# Supplementary material for: Gene Expression in the Hippocampus in a Rat Model of Premenstrual Dysphoric Disorder After Treatment With Baixiangdan Capsules
Source: Front Psychol. 2018 Nov 13;9:2065. doi: 10.3389/fpsyg.2018.02065 (PMC6242977; doi:10.3389/fpsyg.2018.02065)
Supplement: Supplementary file 2 [file Data_Sheet_2.ZIP]

Archive with 13 entries (12 files):
- Raw Data Files/
- Raw Data Files/14_21.txt
- Raw Data Files/15_11.txt
- Raw Data Files/17_11.txt
- Raw Data Files/17_4.txt
- Raw Data Files/18_8.txt
- Raw Data Files/21_20.txt
- Raw Data Files/24_14.txt
- Raw Data Files/24_22.txt
- Raw Data Files/2_26.txt
- Raw Data Files/3_1.txt
- Raw Data Files/4_4.txt
- Raw Data Files/6_25.txt
