# Supplementary material for: Gene Expression in the Hippocampus in a Rat Model of Premenstrual Dysphoric Disorder After Treatment With Baixiangdan Capsules
Source: Front Psychol. 2018 Nov 13;9:2065. doi: 10.3389/fpsyg.2018.02065 (PMC6242977; doi:10.3389/fpsyg.2018.02065)
Supplement: Supplementary file 2 [file Data_Sheet_2.ZIP › Raw Data Files/2_26.txt]

TYPE	text	text	text	integer	text	float	float	text	integer	text	text	integer	integer	integer	integer	float	float	float	float	float	float	text	text	text	text	text	text	text	text	text	text	text	integer	integer	integer	text	integer	boolean
FEPARAMS	Protocol_Name	Protocol_date	Scan_ScannerName	Scan_NumChannels	Scan_Date	Scan_MicronsPerPixelX	Scan_MicronsPerPixelY	Scan_OriginalGUID	Scan_NumScanPass	Grid_Name	Grid_Date	Grid_NumSubGridRows	Grid_NumSubGridCols	Grid_NumRows	Grid_NumCols	Grid_RowSpacing	Grid_ColSpacing	Grid_OffsetX	Grid_OffsetY	Grid_NomSpotWidth	Grid_NomSpotHeight	Grid_GenomicBuild	FeatureExtractor_Barcode	FeatureExtractor_Sample	FeatureExtractor_ScanFileName	FeatureExtractor_ArrayName	FeatureExtractor_ScanFileGUID	FeatureExtractor_DesignFileName	FeatureExtractor_ExtractionTime	FeatureExtractor_UserName	FeatureExtractor_ComputerName	FeatureExtractor_Version	FeatureExtractor_IsXDRExtraction	FeatureExtractor_ColorMode	FeatureExtractor_QCReportType	DyeNorm_NormFilename	DyeNorm_NormNumProbes	Grid_IsGridFile
DATA	GE1_1100_Jul11 (Read Only)	1-Jul-2011 22:30	Agilent Technologies Scanner G2505C US10450393	1	07-19-2013 10:55:47	5	5	891b3bcf-7e8d-49b3-9f1b-211571655d1e	1	028282_D_F_20120224	24-Feb-2012 00:00	1	1	532	85	73.3235	63.5	0	36.6617	65	65	rn4:RGSCv3.4:Nov2004	1_4		M:\2013.07.19 Rat GE 1-color 4x44k(sunpeng)\\US10450393_S01.tif	US10450393_S01	0de24e3c-411a-4c92-b222-bf3524e92ef4	028282_D_F_20120224.xml	19-Jul-2013 11:52:30	admin	KCSY01	11.0.1.1	0	0	0		0	0
*
TYPE	float	float	float	integer	integer	float	float	float	integer	float	float	float	integer	float	float	integer	integer	integer	integer	integer	float	float	float	integer	float	float	float	float	float	integer	integer	float	float	float	float	float	integer	float	float	float	float	integer	float	float	float	float	float	integer	float	float	float	float	float	float	float	integer	float	integer	float	float	float	float	integer	float	float	float	float	text	float	float	float	float	float	float	float	float	float	float	float	float	float	float	float	float	float	float	float	float	float	integer	integer	integer	integer	float	integer	text	integer	text	float	float	float	integer	boolean	float	float	boolean	float	boolean	float	boolean	float	boolean	float	boolean	float	boolean	float	boolean	float	boolean	float	boolean	float	boolean	float	boolean
STATS	gDarkOffsetAverage	gDarkOffsetMedian	gDarkOffsetStdDev	gDarkOffsetNumPts	gSaturationValue	gAvgSig2BkgeQC	gAvgSig2BkgNegCtrl	gRatioSig2BkgeQC_NegCtrl	gNumSatFeat	gLocalBGInlierNetAve	gLocalBGInlierAve	gLocalBGInlierSDev	gLocalBGInlierNum	gGlobalBGInlierAve	gGlobalBGInlierSDev	gGlobalBGInlierNum	gNumFeatureNonUnifOL	gNumPopnOL	gNumNonUnifBGOL	gNumPopnBGOL	gOffsetUsed	gGlobalFeatInlierAve	gGlobalFeatInlierSDev	gGlobalFeatInlierNum	AnyColorPrcntFeatNonUnifOL	AnyColorPrcntBGNonUnifOL	AnyColorPrcntFeatPopnOL	AnyColorPrcntBGPopnOL	TotalPrcntFeatOL	gNumNegBGSubFeat	gNonCtrlNumNegFeatBGSubSig	gSpatialDetrendRMSFit	gSpatialDetrendRMSFilteredMinusFit	gSpatialDetrendSurfaceArea	gSpatialDetrendVolume	gSpatialDetrendAveFit	gNonCtrlNumSatFeat	gNonCtrl99PrcntNetSig	gNonCtrl50PrcntNetSig	gNonCtrl1PrcntNetSig	gNonCtrlMedPrcntCVBGSubSig	gCtrleQCNumSatFeat	gCtrleQC99PrcntNetSig	gCtrleQC50PrcntNetSig	gCtrleQC1PrcntNetSig	geQCMedPrcntCVBGSubSig	geQCSig2BkgLow2	gNegCtrlNumInliers	gNegCtrlAveNetSig	gNegCtrlSDevNetSig	gNegCtrlAveBGSubSig	gNegCtrlSDevBGSubSig	gAveNumPixOLLo	gAveNumPixOLHi	gPixCVofHighSignalFeat	gNumHighSignalFeat	AddErrorEstimateGreen	TotalNumFeatures	ROIHeight	ROIWidth	CentroidDiffX	CentroidDiffY	NumFoundFeat	MaxNonUnifEdges	MaxSpotNotFoundEdges	gMultDetrendRMSFit	gMultDetrendSurfaceAverage	eQCLowSigName2	eQCOneColorLogLowSignal	eQCOneColorLogLowSignalError	eQCOneColorLogHighSignal	eQCOneColorLinFitLogLowConc	eQCOneColorLinFitLogLowSignal	eQCOneColorLinFitLogHighConc	eQCOneColorLinFitLogHighSignal	eQCOneColorLinFitSlope	eQCOneColorLinFitIntercept	eQCOneColorLinFitRSQ	eQCOneColorSpikeDetectionLimit	gNonCtrl50PrcntBGSubSig	gCtrleQC50PrcntBGSubSig	gMedPrcntCVProcSignal	geQCMedPrcntCVProcSignal	gOutlierFlagger_Auto_FeatB_Term	gOutlierFlagger_Auto_FeatC_Term	gOutlierFlagger_Auto_BgndB_Term	gOutlierFlagger_Auto_BgndC_Term	OutlierFlagger_FeatChiSq	OutlierFlagger_BgndChiSq	GriddingStatus	IsGoodGrid	NumGeneNonUnifOL	TotalNumberOfReplicatedGenes	gPercentileIntensityProcessedSignal	ExtractionStatus	QCMetricResults	gNonCtrlNumWellAboveBG	ImageDepth	AFHold	gPMTVolts	GlassThickness	gDDN	GridHasBeenOptimized	gNegCtrlSpread	Metric_IsGoodGrid	Metric_IsGoodGrid_IsInRange	Metric_AnyColorPrcntFeatNonUnifOL	Metric_AnyColorPrcntFeatNonUnifOL_IsInRange	Metric_gNegCtrlAveNetSig	Metric_gNegCtrlAveNetSig_IsInRange	Metric_gNegCtrlAveBGSubSig	Metric_gNegCtrlAveBGSubSig_IsInRange	Metric_gNegCtrlSDevBGSubSig	Metric_gNegCtrlSDevBGSubSig_IsInRange	Metric_gSpatialDetrendRMSFilteredMinusFit	Metric_gSpatialDetrendRMSFilteredMinusFit_IsInRange	Metric_gNonCntrlMedCVProcSignal	Metric_gNonCntrlMedCVProcSignal_IsInRange	Metric_gE1aMedCVProcSignal	Metric_gE1aMedCVProcSignal_IsInRange	Metric_absGE1E1aSlope	Metric_absGE1E1aSlope_IsInRange	Metric_DetectionLimit	Metric_DetectionLimit_IsInRange	Metric_gDDN	Metric_gDDN_IsInRange
DATA	7.24727	7.24727	1.71313	0	778248	1.33657	1.51612	0.881569	0	34.6084	41.8557	3.54925	43422	41.8557	3.54925	43422	4	577	33	832	7.24727	1927.23	7033.27	43674	0.00903873	0.0745695	1.30384	1.88006	0.00932901	1518	791	1.2291	2.47665	1.00012	3.78633	63.31	0	28611.3	238.146	54.1721	7.71327	0	185.498	61.9947	50.6604	-1	1.36531	148	51.7689	2.52881	-4.25149	2.37892	0.636327	0.669363	0.12258	2734	2.47665	44254	4.36651	7.61785	0.736343	1.14617	42299	0	0.0977444	0.0598728	1.00014	(+)E1A_r60_3	0	0	0	0	0	0	0	0	0	0	-1	181.954	6.01581	3.38805	-1	1148.06	104.353	117.25	57.1553	1.9459	2.48847	0	1	3	30367	1154.02	1	ExtractionEvaluate	37921	20 Bit	0	354	968.949	0	0	7.38772	1	1	0.00903873	1	51.7689	0	-4.25149	1	2.37892	1	2.47665	1	3.38805	1	-1	0	0	0	-1	0	0	1
*
TYPE	integer	integer	integer	integer	integer	text	text	float	float	float	float	float	float	float	boolean	boolean	boolean	boolean	boolean	boolean	float	boolean	boolean	float	float
FEATURES	FeatureNum	Row	Col	SubTypeMask	ControlType	ProbeName	SystematicName	PositionX	PositionY	gProcessedSignal	gProcessedSigError	gMedianSignal	gBGMedianSignal	gBGPixSDev	gIsSaturated	gIsFeatNonUnifOL	gIsBGNonUnifOL	gIsFeatPopnOL	gIsBGPopnOL	IsManualFlag	gBGSubSignal	gIsPosAndSignif	gIsWellAboveBG	SpotExtentX	gBGMeanSignal
DATA	1	1	1	260	1	GE_BrightCorner	GE_BrightCorner	9886.66	183.419	2.851626e+004	2.851627e+003	25426	34	8.323753e+000	0	0	0	0	0	0	25487.2	1	1	56.419	34.4834
DATA	2	1	2	66	1	DarkCorner	DarkCorner	9911.89	183.5	2.769510e+000	2.759235e+000	58.5	35	9.019176e+000	0	0	0	0	0	0	-3.80688	0	0	56.9804	36.1906
DATA	3	1	3	66	1	DarkCorner	DarkCorner	9937.42	183.427	3.540762e+000	2.770287e+000	64	36	8.134621e+000	0	0	0	0	0	0	3.19164	1	0	57.5363	36.4675
DATA	4	1	4	66	1	DarkCorner	DarkCorner	9962.93	183.059	2.746419e+000	2.736229e+000	58	36	8.510616e+000	0	0	0	0	0	0	-3.85393	0	0	46.8651	36.158
DATA	5	1	5	66	1	DarkCorner	DarkCorner	9988.11	183.5	2.735063e+000	2.724932e+000	64	35	7.772277e+000	0	0	0	0	0	0	0.087325	0	0	56.9804	35.3215
DATA	6	1	6	66	1	DarkCorner	DarkCorner	10013.5	183.408	2.724099e+000	2.713993e+000	61.5	35	7.829350e+000	0	0	0	0	0	0	-1.24795	0	0	49.8279	35.6743
DATA	7	1	7	66	1	DarkCorner	DarkCorner	10039	183.295	2.713422e+000	2.703355e+000	61	36	7.840289e+000	0	0	0	0	0	0	-2.04974	0	0	49.5074	36.2233
DATA	8	1	8	66	1	DarkCorner	DarkCorner	10063.9	183.526	2.703215e+000	2.693186e+000	57	36	7.947361e+000	0	0	0	0	0	0	-3.85972	0	0	49.8279	35.9436
DATA	9	1	9	66	1	DarkCorner	DarkCorner	10090.1	182.949	2.693157e+000	2.683166e+000	56	35	7.500989e+000	0	0	0	0	0	0	-6.08684	0	0	47.8731	35.4946
DATA	10	1	10	66	1	DarkCorner	DarkCorner	10115.1	183.479	2.683514e+000	2.673558e+000	61	36	7.813455e+000	0	0	0	0	0	0	-2.15622	0	0	48.5334	35.8178
DATA	11	1	11	66	1	DarkCorner	DarkCorner	10140.3	183.176	2.674551e+000	2.664628e+000	60	35	7.618947e+000	0	0	0	0	0	0	-2.01054	0	0	46.1809	35.6531
DATA	12	1	12	0	0	A_64_P076162	A_64_P076162	10165.7	183.5	4.504982e+001	5.229566e+000	102	33	8.186753e+000	0	0	0	0	0	0	42.0103	1	1	57.5363	34.4255
DATA	13	1	13	0	0	A_64_P002176	NM_001170551	10190.9	183.611	4.701135e+002	4.708584e+001	499.5	34	7.614860e+000	0	0	0	0	0	0	439.753	1	1	48.2044	34.3801
DATA	14	1	14	0	0	A_42_P664913	NM_001108400	10216.2	183.595	1.824536e+002	1.843537e+001	231	35	7.905295e+000	0	0	0	0	0	0	171.167	1	1	50.4627	35.6488
DATA	15	1	15	0	0	A_43_P13320	NM_138880	10242	183.545	1.418363e+001	2.990445e+000	78	35	7.686532e+000	0	0	0	0	0	0	13.343	1	1	55.8519	35.4489
DATA	16	1	16	0	0	A_64_P126523	A_64_P126523	10267.5	183.595	1.791552e+001	3.178889e+000	79.5	34	7.534219e+000	0	0	0	0	0	0	16.8968	1	1	50.1463	34.9714
DATA	17	1	17	0	0	A_64_P038045	XM_002730109	10292.6	183.573	2.980279e+001	3.968140e+000	91	35	7.518756e+000	0	0	0	0	0	0	28.1728	1	1	57.5363	35.1948
DATA	18	1	18	0	0	A_43_P11804	NM_017066	10317.9	183.614	6.472677e+003	6.472730e+002	5955.5	35	8.345346e+000	0	0	0	0	0	0	6131.71	1	1	47.2035	35.7276
DATA	19	1	19	0	0	A_44_P808710	XM_001069205	10343.6	183.573	2.274086e+001	3.461239e+000	82.5	36	8.205921e+000	0	0	0	0	0	0	21.5844	1	1	57.5363	36.1866
DATA	20	1	20	0	0	A_64_P142111	NM_001100887	10368.9	183.733	7.649892e+002	7.654326e+001	780	34	8.079062e+000	0	0	0	0	0	0	727.32	1	1	52.3208	34.8346
DATA	21	1	21	0	0	A_64_P095642	A_64_P095642	10394.4	183.573	1.012249e+002	1.045136e+001	158.5	34	7.754329e+000	0	0	0	0	0	0	96.3799	1	1	57.5363	34.9218
DATA	22	1	22	0	0	A_42_P735279	NM_001004446	10419.7	183.82	1.123521e+004	1.123524e+003	10495	35	7.946809e+000	0	0	0	0	0	0	10710.9	1	1	52.3208	35.222
DATA	23	1	23	0	0	A_44_P902822	XM_001063709	10445.2	183.831	3.062795e+001	4.014521e+000	93.5	35	7.515454e+000	0	0	0	0	0	0	29.2275	1	1	46.8651	35.0723
DATA	24	1	24	0	0	A_42_P563843	NM_022263	10470.2	183.814	2.603053e+000	2.595844e+000	66	34	7.724783e+000	0	0	0	0	0	0	1.07632	0	0	43.7019	34.7104
DATA	25	1	25	0	0	A_42_P610788	NM_031544	10495.6	183.52	2.784373e+003	2.784493e+002	2626	34	7.681024e+000	0	0	0	0	0	0	2660.3	1	1	49.5074	34.3853
DATA	26	1	26	0	0	A_44_P242429	NM_001134842	10520.8	183.711	1.150030e+003	1.150322e+002	1093	34	7.943728e+000	0	0	0	0	0	0	1099.1	1	1	49.5074	34.7861
DATA	27	1	27	0	0	A_64_P020571	NM_001031659	10546.3	183.905	1.938813e+002	1.956053e+001	244	34	7.893780e+000	0	0	0	0	0	0	185.304	1	1	48.8603	34.5192
DATA	28	1	28	0	0	A_42_P518462	NM_001007020	10571.8	184	3.060733e+003	3.060843e+002	2867	35	8.071256e+000	0	0	0	0	0	0	2924.7	1	1	46.8651	35.6646
DATA	29	1	29	0	0	A_42_P469751	XM_001054007	10597.3	183.986	1.375013e+002	1.399251e+001	189	35	7.810341e+000	0	0	0	0	0	0	131.327	1	1	47.2035	35.1321
DATA	30	1	30	0	0	A_44_P209459	NM_022387	10622.9	183.935	4.843977e+003	4.844047e+002	4554	35	8.159274e+000	0	0	0	0	0	0	4623.07	1	1	54.4085	35.0654
DATA	31	1	31	0	0	A_64_P018547	NM_001108717	10648.2	184.111	5.177516e+002	5.184028e+001	542.5	34	7.588400e+000	0	0	0	0	0	0	493.673	1	1	46.8651	34.588
DATA	32	1	32	0	0	A_64_P111513	A_64_P111513	10673.8	183.95	1.174040e+001	2.853414e+000	76	34	7.542182e+000	0	0	0	0	0	0	11.1804	1	0	44.7812	34.316
DATA	33	1	33	0	0	A_42_P493925	NM_198785	10698.8	184	1.897083e+002	1.914877e+001	242.5	34	7.476022e+000	0	0	0	0	0	0	180.402	1	1	46.8651	34.6257
DATA	34	1	34	0	0	A_64_P049828	NM_012543	10724.3	184	5.318586e+002	5.324981e+001	568	34	7.771581e+000	0	0	0	0	0	0	504.907	1	1	49.1849	34.6608
DATA	35	1	35	0	0	A_64_P137927	NM_001191885	10749.7	183.882	1.479993e+002	1.502900e+001	199	34	7.633356e+000	0	0	0	0	0	0	140.225	1	1	45.835	34.3126
DATA	36	1	36	0	0	A_43_P19848	NM_001106018	10775.3	184.03	3.860769e+001	4.665618e+000	101	35	8.257949e+000	0	0	0	0	0	0	36.5005	1	1	46.1809	35.2042
DATA	37	1	37	0	0	A_44_P308673	NM_139108	10800.4	183.908	1.521654e+002	1.544146e+001	205	34	7.682477e+000	0	0	0	0	0	0	143.517	1	1	49.1849	34.9751
DATA	38	1	38	0	0	A_64_P004269	NM_001191660	10825.8	184.111	9.165483e+002	9.169263e+001	910	35	7.741533e+000	0	0	0	0	0	0	862.21	1	1	49.5074	35.2581
DATA	39	1	39	0	0	A_42_P543670	NM_012572	10851.1	184.155	1.071311e+002	1.103364e+001	165	35	8.191486e+000	0	0	0	0	0	0	100.495	1	1	46.8651	35.5067
DATA	40	1	40	0	0	A_64_P164696	TC605704	10876.5	184.26	2.658092e+000	2.648231e+000	63	34	7.616290e+000	0	0	0	0	0	0	-0.0704481	0	0	48.8603	34.3327
DATA	41	1	41	0	0	A_64_P055763	NM_001191822	10902.1	184.027	6.530206e+003	6.530260e+002	6182	34	7.434876e+000	0	0	0	0	0	0	6086.91	1	1	46.8651	34.2182
DATA	42	1	42	0	0	A_64_P068622	NM_001013056	10927.3	184.389	9.941244e+002	9.944818e+001	975	34	7.909493e+000	0	0	0	0	0	0	923.5	1	1	48.2044	35.0178
DATA	43	1	43	0	0	A_44_P915877	XM_001065403	10953	184.455	1.069855e+002	1.102812e+001	158	35	8.178888e+000	0	0	0	0	0	0	99.0196	1	1	55.8519	35.517
DATA	44	1	44	0	0	A_42_P647599	NM_024129	10978.1	183.969	3.211077e+002	3.222293e+001	358.5	35	7.547708e+000	0	0	0	1	0	0	296.057	1	1	46.5243	34.9273
DATA	45	1	45	0	0	A_42_P798776	XM_002725203	11003.7	184.222	2.252278e+003	2.252439e+002	2064.5	35	7.953902e+000	0	0	0	0	0	0	2068.26	1	1	47.5395	34.6365
DATA	46	1	46	0	0	A_42_P781735	NM_053319	11029.4	184.427	5.505413e+004	5.505414e+003	50323	34	7.749836e+000	0	0	0	0	0	0	50344.9	1	1	57.5363	35.1984
DATA	47	1	47	0	0	A_42_P553611	TC630296	11054.4	184.444	1.763334e+003	1.763544e+002	1624.5	34	7.669129e+000	0	0	0	0	0	0	1605.68	1	1	48.2044	34.4872
DATA	48	1	48	0	0	A_43_P12729	NM_032615	11079.6	184.521	1.532841e+003	1.533085e+002	1421	34	7.760376e+000	0	0	0	0	0	0	1389.65	1	1	48.2044	34.6074
DATA	49	1	49	0	0	A_42_P507072	FQ213070	11105.1	183.969	1.467697e+003	1.467954e+002	1352	35	7.736743e+000	0	0	0	0	0	0	1324.37	1	1	46.5243	35.4906
DATA	50	1	50	0	0	A_42_P645467	NM_001108804	11130.4	184.211	1.750644e+001	3.266241e+000	77	35	7.842267e+000	0	0	0	0	0	0	15.7237	1	1	47.5395	34.5521
DATA	51	1	51	0	0	A_42_P738431	NM_019175	11156	184.289	7.272790e+002	7.278066e+001	695	35	7.663683e+000	0	0	0	0	0	0	650.065	1	1	49.1849	34.5019
DATA	52	1	52	0	0	A_42_P712297	NM_001135583	11181.4	184.237	1.860756e+003	1.860965e+002	1704.5	33	7.430010e+000	0	0	0	0	0	0	1655.07	1	1	49.1849	33.4275
DATA	53	1	53	0	0	A_42_P657538	NM_001008362	11206.8	184.533	1.213148e+003	1.213471e+002	1091	35	7.129969e+000	0	0	0	0	0	0	1073.74	1	1	49.5074	34.8449
DATA	54	1	54	0	0	A_42_P515405	NM_212505	11232.1	184.771	3.029632e+002	3.042655e+001	333	36	7.451949e+000	0	0	0	1	0	0	266.816	1	1	46.5243	35.7773
DATA	55	1	55	0	0	A_64_P089886	NM_053476	11257.3	184.629	2.065727e+003	2.065920e+002	1799	34	7.809697e+000	0	0	0	0	0	0	1810.09	1	1	47.8731	34.6868
DATA	56	1	56	0	0	A_42_P528580	NM_001107528	11282.7	184.577	2.467041e+003	2.467205e+002	2122	34	7.678730e+000	0	0	0	0	0	0	2150.72	1	1	50.1463	34.6371
DATA	57	1	57	0	0	A_43_P14285	NM_001034145	11308.4	184.267	4.678453e+003	4.678541e+002	3986.5	35	8.244290e+000	0	0	0	0	0	0	4057.31	1	1	49.1849	35.2418
DATA	58	1	58	0	0	A_42_P616287	NM_001134555	11333.7	184.357	1.098187e+002	1.135078e+001	156.5	35	8.186383e+000	0	0	0	0	0	0	94.7567	1	1	47.8731	35.5504
DATA	59	1	59	0	0	A_42_P496411	NM_001109410	11359.1	184.627	2.273946e+003	2.274129e+002	1955	36	8.477497e+000	0	0	0	0	0	0	1952.17	1	1	45.835	36.6238
DATA	60	1	60	0	0	A_44_P494310	NM_001009604	11384.4	184.575	2.630917e+003	2.631077e+002	2199	35	8.220584e+000	0	0	0	0	0	0	2247.31	1	1	48.5334	35.5433
DATA	61	1	61	0	0	A_42_P645142	NM_019375	11409.8	184.553	3.471274e+002	3.483483e+001	354	35	7.131320e+000	0	0	0	0	0	0	295.034	1	1	49.8279	35.074
DATA	62	1	62	0	0	A_64_P042132	AABR03024196	11435.5	184.757	6.565867e+003	6.565933e+002	5622.5	35	7.629708e+000	0	0	0	0	0	0	5553.1	1	1	49.1849	35.2775
DATA	63	1	63	0	0	A_42_P508085	NM_001009620	11460.6	184.623	1.191856e+003	1.192219e+002	1016.5	34	7.264893e+000	0	0	0	0	0	0	1003.21	1	1	49.5074	34.0507
DATA	64	1	64	0	0	A_64_P051159	NM_001100684	11486	184.873	7.972005e+002	7.977483e+001	730	34	8.291225e+000	0	0	0	0	0	0	667.911	1	1	46.8651	34.9438
DATA	65	1	65	0	0	A_64_P124041	ENSRNOT00000019667	11511.5	184.676	6.683521e+001	7.313571e+000	112.5	36	8.126769e+000	0	0	0	0	0	0	55.7396	1	1	49.1849	36.4195
DATA	66	1	66	0	0	A_64_P131122	XR_086302	11536.6	184.857	4.842750e+001	5.687454e+000	105	35	7.428562e+000	0	0	0	0	0	0	40.2148	1	1	50.1463	35.5049
DATA	67	1	67	0	0	A_64_P021601	NM_031737	11562.3	184.743	5.481494e+001	6.246418e+000	106	35	7.616791e+000	0	0	0	0	0	0	45.3257	1	1	48.8603	35.3872
DATA	68	1	68	0	0	A_44_P776423	NM_001017386	11587.4	184.747	4.414240e+003	4.414342e+002	3529	35	7.918915e+000	0	0	0	0	0	0	3635.7	1	1	49.1849	35.411
DATA	69	1	69	0	0	A_64_P120445	NM_080694	11613.2	184.662	4.840941e+001	5.704911e+000	97	34	7.528898e+000	0	0	0	0	0	0	39.7196	1	1	45.4864	35.2015
DATA	70	1	70	0	0	A_42_P772878	NM_001011936	11638.2	185.043	1.671254e+003	1.671528e+002	1403	34	7.364271e+000	0	0	0	0	0	0	1366.66	1	1	46.8651	34.7714
DATA	71	1	71	0	0	A_42_P736315	NM_001108321	11663.7	184.753	1.170891e+003	1.171285e+002	944.5	34	6.868981e+000	0	0	0	0	0	0	954.369	1	1	48.2044	34.3949
DATA	73	1	73	0	0	A_64_P041004	NM_001108599	11714.6	184.732	1.261525e+004	1.261528e+003	10080	35	8.410534e+000	0	0	0	0	0	0	10226.5	1	1	47.5395	35.9207
DATA	74	1	74	0	0	A_42_P494276	NM_001109663	11739.8	184.912	3.397479e+002	3.411247e+001	340	34	8.074162e+000	0	0	0	0	0	0	274.825	1	1	46.5243	34.8121
DATA	75	1	75	66	1	DarkCorner	DarkCorner	11766.2	184.685	3.078959e+000	3.067536e+000	58	34	7.621793e+000	0	0	0	0	0	0	-0.874416	0	0	47.5395	34.4391
DATA	76	1	76	66	1	DarkCorner	DarkCorner	11791	185	3.082880e+000	3.071443e+000	56	34	8.029966e+000	0	0	0	0	0	0	-3.4651	0	0	54.9904	34.9864
DATA	77	1	77	66	1	DarkCorner	DarkCorner	11816.7	185.721	3.085332e+000	3.073885e+000	60	34	7.932137e+000	0	0	0	0	0	0	-0.281573	0	0	36.5637	35.1802
DATA	78	1	78	66	1	DarkCorner	DarkCorner	11841.5	185	3.087070e+000	3.075617e+000	58	36	7.833493e+000	0	0	0	0	0	0	-0.143698	0	0	54.1152	35.7931
DATA	79	1	79	66	1	DarkCorner	DarkCorner	11867.5	185	3.086853e+000	3.075400e+000	60	36	8.161800e+000	0	0	0	0	0	0	-0.425206	0	0	54.1152	36.2744
DATA	80	1	80	66	1	DarkCorner	DarkCorner	11892.5	185	3.084997e+000	3.078122e+000	62	36	8.321576e+000	0	0	0	0	0	0	1.35106	0	0	54.1152	36.3393
DATA	81	1	81	66	1	DarkCorner	DarkCorner	11918	184.983	3.081351e+000	3.069919e+000	59	34	7.856425e+000	0	0	0	0	0	0	-0.126137	0	0	44.0646	34.8073
DATA	82	1	82	66	1	DarkCorner	DarkCorner	11943.6	184.958	3.075820e+000	3.064408e+000	56	34	7.977166e+000	0	0	0	0	0	0	-1.99748	0	0	48.5334	35.0544
DATA	83	1	83	66	1	DarkCorner	DarkCorner	11968.5	185	3.068522e+000	3.057138e+000	57	34	8.573663e+000	0	0	0	0	0	0	-1.68367	0	0	54.1152	34.9923
DATA	84	1	84	260	1	GE_BrightCorner	GE_BrightCorner	11994.1	185.065	3.291072e+004	3.291074e+003	26759.5	34	8.283825e+000	0	0	0	0	0	0	26745	1	1	54.4085	34.0781
DATA	85	1	85	260	1	GE_BrightCorner	GE_BrightCorner	12019.5	185.352	3.265269e+004	3.265271e+003	26529	33	7.944724e+000	0	0	0	0	0	0	26637.5	1	1	57.5363	33.3013
DATA	86	2	1	260	1	GE_BrightCorner	GE_BrightCorner	9899.42	190.573	2.794171e+004	2.794173e+003	24783	36	9.512331e+000	0	0	0	0	0	0	25058.1	1	1	57.5363	37.1422
DATA	87	2	2	66	1	DarkCorner	DarkCorner	9924.58	190.573	4.345023e+000	2.784255e+000	66	36	9.468752e+000	0	0	0	0	0	0	3.91293	1	0	57.5363	37.3403
DATA	88	2	3	66	1	DarkCorner	DarkCorner	9950.06	190.663	2.748810e+000	2.738611e+000	56.5	39	7.975218e+000	0	0	0	0	0	0	-5.89899	0	0	52.3208	38.3842
DATA	89	2	4	66	1	DarkCorner	DarkCorner	9975.31	190.632	2.737601e+000	2.727444e+000	55.5	35	7.717834e+000	0	0	0	0	0	0	-7.31906	0	0	46.5243	35.1292
DATA	90	2	5	66	1	DarkCorner	DarkCorner	10000.6	190.573	2.726639e+000	2.717207e+000	63	36	8.556910e+000	0	0	0	0	0	0	0.555884	0	0	65	36.6875
DATA	91	2	6	66	1	DarkCorner	DarkCorner	10025.8	191.267	2.715664e+000	2.705589e+000	57	36	8.012521e+000	0	0	0	0	0	0	-4.31926	0	0	48.2044	36.4726
DATA	92	2	7	66	1	DarkCorner	DarkCorner	10051.1	191	2.705389e+000	2.695352e+000	55	37	8.309079e+000	0	0	0	0	0	0	-6.84113	0	0	48.5334	36.9847
DATA	93	2	8	66	1	DarkCorner	DarkCorner	10076.5	190.975	2.695312e+000	2.685312e+000	58.5	36	7.644309e+000	0	0	0	0	0	0	-1.65238	0	0	50.4627	35.7917
DATA	94	2	9	66	1	DarkCorner	DarkCorner	10103.2	190.844	2.685163e+000	2.675201e+000	60	36	7.201062e+000	0	0	0	0	0	0	-3.62818	0	0	48.2044	36.8143
DATA	95	2	10	66	1	DarkCorner	DarkCorner	10127.3	190.806	2.676336e+000	2.666407e+000	59	35	7.693138e+000	0	0	0	0	0	0	-4.33185	0	0	47.8731	35.9847
DATA	96	2	11	0	0	A_44_P212746	ENSRNOT00000049707	10153.3	190.821	1.387375e+001	2.997739e+000	76	37	8.435692e+000	0	0	0	0	0	0	12.9302	1	1	42.2201	37.1256
DATA	97	2	12	0	0	A_64_P103615	NM_001107179	10178.5	191	3.473323e+001	4.368188e+000	95.5	33	7.809376e+000	0	0	0	0	0	0	32.4737	1	1	48.5334	34.4154
DATA	98	2	13	0	0	A_44_P550697	NM_001106400	10203.5	191.261	1.503013e+002	1.526041e+001	199	35	7.604804e+000	0	0	0	0	0	0	140.943	1	1	46.8651	35.8711
DATA	99	2	14	0	0	A_64_P045429	A_64_P045429	10229.2	191.127	6.903583e+001	7.388881e+000	127.5	35	8.927926e+000	0	0	0	0	0	0	64.9204	1	1	47.2035	36.784
DATA	100	2	15	0	0	A_64_P075175	ENSRNOT00000044322	10254.9	191.154	2.666542e+002	2.679448e+001	311.5	35	7.280625e+000	0	0	0	0	0	0	251.423	1	1	48.5334	35.6425
DATA	101	2	16	0	0	A_44_P472801	NM_173121	10279.6	191.307	1.771182e+003	1.771376e+002	1686	34	7.856438e+000	0	0	0	0	0	0	1673.99	1	1	47.8731	34.911
DATA	102	2	17	0	0	A_42_P491486	NM_022533	10305.1	191.099	1.865401e+003	1.865584e+002	1781	35	7.405809e+000	0	0	0	0	0	0	1766.92	1	1	46.8651	35.885
DATA	103	2	18	0	0	A_43_P12736	NM_033299	10330.6	191.069	5.541191e+001	6.124857e+000	115	36	8.673878e+000	0	0	0	0	0	0	52.5925	1	1	53.8203	36.5692
DATA	104	2	19	0	0	A_64_P158790	A_64_P158790	10356.5	191	1.587993e+004	1.587995e+003	15222.5	36	7.713468e+000	0	0	0	0	0	0	15099.3	1	1	54.1152	35.8619
DATA	105	2	20	0	0	A_44_P229481	NM_001191077	10381.5	191	1.683374e+002	1.703344e+001	222	35	8.371477e+000	0	0	0	0	0	0	160.309	1	1	54.1152	35.3349
DATA	106	2	21	0	0	A_64_P133836	ENSRNOT00000039319	10407.1	191.386	8.954041e+000	2.747085e+000	70	36	7.552542e+000	0	0	0	0	0	0	8.53889	1	0	65	35.6111
DATA	107	2	22	0	0	A_43_P13137	NM_130818	10432.5	191.352	8.886501e+000	2.742191e+000	69	36	8.536148e+000	0	0	0	0	0	0	8.48381	1	0	57.5363	36.5049
DATA	108	2	23	0	0	A_42_P586141	NM_017035	10457.6	191.36	1.092366e+002	1.122697e+001	168.5	35.5	7.595890e+000	0	0	0	0	0	0	104.376	1	1	48.8603	35.9559
DATA	109	2	24	0	0	A_44_P142850	NM_001106975	10483	191.215	3.111032e+001	4.048292e+000	94	34	7.489936e+000	0	0	0	0	0	0	29.7443	1	1	45.4864	34.0991
DATA	110	2	25	0	0	A_44_P1042504	NM_001044232	10508.4	191.155	8.324686e+001	8.718111e+000	141	35	8.081153e+000	0	0	0	0	0	0	79.6217	1	1	47.5395	36.1084
DATA	111	2	26	0	0	A_42_P476474	NM_001033926	10533.7	191.222	1.919870e+003	1.920044e+002	1902.5	34	8.330487e+000	0	0	0	0	0	0	1836.54	1	1	47.5395	35.165
DATA	112	2	27	0	0	A_44_P480882	ENSRNOT00000035496	10559.4	191.427	7.207117e+000	2.687671e+000	67.5	35.5	8.697292e+000	0	0	0	0	0	0	6.89373	1	0	57.5363	35.5962
DATA	113	2	28	0	0	A_44_P1042696	NM_001106377	10584.7	191.301	3.961271e+003	3.961355e+002	3799.5	37	1.060649e+001	0	0	0	0	0	0	3787.64	1	1	51.4001	38.6343
DATA	114	2	29	0	0	A_64_P132576	NM_001012357	10610.4	191.52	2.408944e+002	2.422845e+001	295.5	34	7.756054e+000	0	0	0	0	0	0	230.201	1	1	49.1849	35.2451
DATA	115	2	30	0	0	A_42_P652357	NM_021868	10635.5	191.5	1.275734e+004	1.275737e+003	11813	36	8.468905e+000	0	0	0	0	0	0	12180.8	1	1	52.9257	36.134
DATA	116	2	31	0	0	A_64_P134935	NM_001107976	10661	191.455	1.266271e+001	2.889018e+000	74	35	7.173732e+000	0	0	0	0	0	0	12.0772	1	0	55.8519	34.6965
DATA	117	2	32	0	0	A_64_P034019	NM_001107145	10686.4	191.427	2.341446e+001	3.499065e+000	82	34	7.686243e+000	0	0	0	0	0	0	22.3018	1	1	57.5363	34.6847
DATA	118	2	33	0	0	A_64_P140634	A_64_P140634	10711.4	191.471	2.848394e+003	2.848513e+002	2690	34	6.769022e+000	0	0	0	0	0	0	2708.86	1	1	46.5243	34.1553
DATA	120	2	35	0	0	A_42_P746029	NM_144748	10762.5	191.5	2.129429e+001	3.371845e+000	82.5	35	9.046987e+000	0	0	0	0	0	0	20.1726	1	1	57.5363	36.1759
DATA	121	2	36	0	0	A_64_P009032	NM_001105801	10787.9	191.5	2.157573e+004	2.157575e+003	20048	35	7.606147e+000	0	0	0	0	0	0	20392.7	1	1	56.9804	35.198
DATA	122	2	37	0	0	A_42_P764792	NM_001014036	10813.5	191.5	1.931492e+002	1.949275e+001	234.5	35	7.050351e+000	0	0	0	0	0	0	182.097	1	1	57.5363	35.7143
DATA	123	2	38	0	0	A_64_P029278	NM_001108687	10838.5	191.769	3.669159e+002	3.678601e+001	410	36	8.483126e+000	0	0	0	0	0	0	345.005	1	1	49.8279	36.6497
DATA	124	2	39	0	0	A_43_P12266	NM_022622	10863.6	192.077	5.033348e+001	5.684381e+000	107.5	35	7.977774e+000	0	0	0	0	0	0	47.192	1	1	45.1352	35.6071
DATA	125	2	40	0	0	A_44_P204710	ENSRNOT00000049315	10889.5	191.5	2.027359e+001	3.336727e+000	78.5	34	7.636454e+000	0	0	0	0	0	0	18.946	1	1	57.5363	34.219
DATA	126	2	41	0	0	A_64_P163837	NM_001013149	10914.9	191.5	1.045315e+002	1.078606e+001	156.5	34	7.646726e+000	0	0	0	0	0	0	97.3591	1	1	56.9804	34.7143
DATA	127	2	42	0	0	A_64_P016202	XM_001080153	10940.4	191.573	2.678514e+000	2.669026e+000	63	35	8.488218e+000	0	0	0	0	0	0	0.454275	0	0	57.5363	35.9246
DATA	128	2	43	0	0	A_64_P137168	NM_053912	10965.4	191.63	3.376759e+003	3.376865e+002	3146	35	8.241523e+000	0	0	0	0	0	0	3122.45	1	1	48.2044	35.4394
DATA	129	2	44	0	0	A_42_P830598	XM_001063895	10990.6	191.594	4.261015e+002	4.269490e+001	448.5	35	7.340601e+000	0	0	0	0	0	0	392.483	1	1	47.5395	34.4038
DATA	130	2	45	0	0	A_42_P525886	NM_001105716	11016.5	191.5	5.950858e+001	6.534738e+000	115	35	7.836900e+000	0	0	0	0	0	0	54.5856	1	1	57.5363	35.4512
DATA	131	2	46	0	0	A_42_P836392	NM_134383	11041.7	191.5	4.231551e+003	4.231638e+002	3916.5	36	8.491652e+000	0	0	0	0	0	0	3865.24	1	1	57.5363	36.2741
DATA	132	2	47	0	0	A_44_P146783	NM_001001366	11067.3	191.5	2.830523e+001	3.927937e+000	85	34	7.618937e+000	0	0	0	0	0	0	25.7408	1	1	46.5243	34.6509
DATA	133	2	48	0	0	A_44_P294675	NM_053687	11092.4	192.13	4.183332e+001	4.998211e+000	98	35	7.204640e+000	0	0	0	0	0	0	37.8776	1	1	46.8651	34.7732
DATA	134	2	49	0	0	A_64_P047137	NM_001001283	11118	191.545	1.478589e+001	3.120820e+000	74	36	7.492348e+000	0	0	0	0	0	0	13.3243	1	1	55.8519	36.4597
DATA	135	2	50	0	0	A_44_P170396	NM_017267	11143.5	191.648	1.477663e+001	3.131909e+000	74	35	7.339212e+000	0	0	0	0	0	0	13.2529	1	1	65	34.8955
DATA	136	2	51	0	0	A_64_P077603	ENSRNOT00000037503	11168.7	191.853	4.835146e+001	5.574681e+000	108	35	7.637310e+000	0	0	0	0	0	0	43.1592	1	1	45.835	34.4608
DATA	137	2	52	0	0	A_42_P648800	AA998304	11194	191.435	7.386392e+001	7.895193e+000	126.5	34	7.294148e+000	0	0	0	0	0	0	65.6053	1	1	47.8731	34.3832
DATA	138	2	53	0	0	A_64_P143186	A_64_P143186	11219.2	191.831	4.923442e+001	5.664982e+000	108	36	7.463810e+000	0	0	0	0	0	0	43.5162	1	1	47.5395	36.8058
DATA	139	2	54	0	0	A_42_P622681	NM_001030020	11244.7	192.028	1.324531e+003	1.324830e+002	1209	35	6.963519e+000	0	0	0	1	0	0	1164.82	1	1	47.8731	35.3906
DATA	140	2	55	0	0	A_42_P506076	NM_019253	11270.5	192	1.226536e+004	1.226540e+003	10490.5	33	7.269847e+000	0	0	0	1	0	0	10730.8	1	1	54.1152	33.8528
DATA	141	2	56	0	0	A_64_P158975	NM_001109536	11295.3	192.083	8.849522e+001	9.295562e+000	142	35	7.401552e+000	0	0	0	0	0	0	77.0404	1	1	47.8731	34.7423
DATA	142	2	57	0	0	A_42_P655425	NM_001106406	11320.9	191.896	3.294921e+002	3.307307e+001	343	35	8.028515e+000	0	0	0	1	0	0	285.361	1	1	46.8651	35.5073
DATA	143	2	58	0	0	A_44_P408520	NM_031569	11346.4	191.794	1.093780e+002	1.130917e+001	156	35	8.183832e+000	0	0	0	0	0	0	94.2448	1	1	46.8651	36.2385
DATA	144	2	59	0	0	A_64_P031259	NM_001002022	11372	191.841	1.441873e+002	1.470531e+001	188	36	8.732115e+000	0	0	0	0	0	0	123.607	1	1	46.8651	37.5377
DATA	145	2	60	0	0	A_43_P10227	NM_024397	11396.8	192.103	5.740638e+003	5.740712e+002	4825.5	34	7.154601e+000	0	0	0	0	0	0	4897.39	1	1	46.5243	34.8119
DATA	146	2	61	0	0	A_42_P542744	NM_001107544	11422.4	191.972	2.737400e+003	2.737555e+002	2339	36	7.108607e+000	0	0	0	1	0	0	2323.66	1	1	48.2044	35.7062
DATA	147	2	62	0	0	A_64_P052387	A_64_P052387	11448	192.23	5.496929e+001	6.229879e+000	107.5	35	7.747304e+000	0	0	0	0	0	0	46.4363	1	1	47.8731	35.9356
DATA	149	2	64	0	0	A_64_P064823	ENSRNOT00000050238	11498.9	192.107	1.658104e+002	1.684307e+001	200	36	9.138912e+000	0	0	0	0	0	0	138.764	1	1	47.8731	37.3122
DATA	150	2	65	0	0	A_42_P730292	NM_001004244	11524	192	1.244637e+003	1.244992e+002	1090	36	7.557428e+000	0	0	0	0	0	0	1037.02	1	1	46.8651	36.2414
DATA	151	2	66	0	0	A_64_P052878	FM104687	11549.4	192.072	2.902215e+002	2.917527e+001	296	35	7.342491e+000	0	0	0	0	0	0	240.782	1	1	46.5243	35.0637
DATA	152	2	67	0	0	A_64_P157171	XM_001063008	11574.9	192.186	1.848372e+003	1.848615e+002	1647	36	8.110272e+000	0	0	0	0	0	0	1527.25	1	1	44.4243	35.4975
DATA	153	2	68	0	0	A_44_P693350	ENSRNOT00000030985	11600.4	192.176	1.618874e+001	3.416849e+000	75	34.5	7.683323e+000	0	0	0	0	0	0	13.3246	1	1	46.8651	35.5192
DATA	154	2	69	0	0	A_64_P090168	NM_001000720	11625.9	192.386	3.480805e+001	4.608161e+000	89	34.5	7.625277e+000	0	0	0	0	0	0	28.5475	1	1	57.259	35.2449
DATA	155	2	70	0	0	A_42_P726392	NM_001106353	11650.8	192.411	6.666151e+002	6.673032e+001	581	35	6.724955e+000	0	0	0	0	0	0	544.938	1	1	48.5334	35.206
DATA	156	2	71	0	0	A_64_P015727	FQ218047	11676.6	192.479	1.735603e+003	1.735869e+002	1464	34	7.669205e+000	0	0	0	0	0	0	1414.46	1	1	48.2044	34.6746
DATA	157	2	72	0	0	A_44_P897023	NM_001008364	11702	192.455	3.517413e+002	3.530588e+001	342.5	34	7.928846e+000	0	0	0	0	0	0	285.879	1	1	55.8519	35.1604
DATA	158	2	73	0	0	A_44_P104776	NM_001001425	11727.2	192.304	4.800102e+001	5.689531e+000	98.5	35.5	9.195808e+000	0	0	0	0	0	0	38.9206	1	1	46.8651	36.5556
DATA	159	2	74	0	0	A_64_P142521	A_64_P142521	11752.8	192.297	1.238891e+001	3.301810e+000	71	35	7.924187e+000	0	0	0	0	0	0	10.0253	1	0	48.8603	35.1005
DATA	160	2	75	66	1	DarkCorner	DarkCorner	11778.3	192.492	3.076721e+000	3.065307e+000	57	34	7.623381e+000	0	0	0	0	0	0	-1.63508	0	0	42.9674	33.9849
DATA	161	2	76	66	1	DarkCorner	DarkCorner	11803.6	192.427	3.391850e+000	3.087515e+000	63	35	8.004583e+000	0	0	0	0	0	0	2.73734	1	0	57.5363	35.5556
DATA	162	2	77	66	1	DarkCorner	DarkCorner	11829	192.455	3.082327e+000	3.070892e+000	56	35	7.524172e+000	0	0	0	0	0	0	-3.39703	0	0	55.8519	35.7806
DATA	163	2	78	66	1	DarkCorner	DarkCorner	11854.5	192.5	3.082866e+000	3.071495e+000	61	36	7.636825e+000	0	0	0	0	0	0	0.162213	0	0	65	36.5124
DATA	164	2	79	66	1	DarkCorner	DarkCorner	11879.5	192.215	3.082007e+000	3.070572e+000	60	37	8.573536e+000	0	0	0	0	0	0	-0.289727	0	0	45.835	36.7744
DATA	165	2	80	66	1	DarkCorner	DarkCorner	11905.3	192.5	3.079040e+000	3.072383e+000	59.5	36	7.968586e+000	0	0	0	0	0	0	1.38117	0	0	57.5363	36.1281
DATA	166	2	81	66	1	DarkCorner	DarkCorner	11930.5	192.5	3.074521e+000	3.071371e+000	62	35	7.644580e+000	0	0	0	0	0	0	1.81971	0	0	57.5363	35.1756
DATA	167	2	82	66	1	DarkCorner	DarkCorner	11956	192.667	3.067964e+000	3.056581e+000	57	34	8.499947e+000	0	0	0	0	0	0	-0.867343	0	0	51.7088	35.4541
DATA	168	2	83	66	1	DarkCorner	DarkCorner	11981.5	192.5	3.059576e+000	3.048225e+000	58	34	8.508198e+000	0	0	0	0	0	0	-0.80179	0	0	57.5363	34.7062
DATA	169	2	84	66	1	DarkCorner	DarkCorner	12006.7	192.5	4.644124e+000	3.073155e+000	65	34.5	7.939011e+000	0	0	0	0	0	0	3.78617	1	0	65	34.8738
DATA	170	2	85	260	1	GE_BrightCorner	GE_BrightCorner	12032.3	192.5	2.998130e+004	2.998132e+003	24815	32	7.703331e+000	0	0	0	0	0	0	24545.5	1	1	57.5363	33.2444
DATA	171	3	1	66	1	DarkCorner	DarkCorner	9886.5	198	2.774351e+000	2.770573e+000	62	35	8.154450e+000	0	0	0	0	0	0	1.70153	0	0	54.1152	35.7591
DATA	172	3	2	66	1	DarkCorner	DarkCorner	9911.61	197.931	2.762888e+000	2.752663e+000	63	39	9.727638e+000	0	0	0	0	0	0	0.10579	0	0	53.8203	39.84
DATA	173	3	3	66	1	DarkCorner	DarkCorner	9937.31	197.915	2.751274e+000	2.741067e+000	61	41	6.283279e+000	0	0	0	0	0	0	-1.64645	0	0	43.7019	41.1
DATA	174	3	4	66	1	DarkCorner	DarkCorner	9962.62	198.233	2.739872e+000	2.729707e+000	58	38	5.551413e+000	0	0	0	0	0	0	-2.8174	0	0	42.9674	38.3333
DATA	175	3	5	66	1	DarkCorner	DarkCorner	9988.21	198.194	2.728731e+000	2.718607e+000	60	36	6.704978e+000	0	0	0	0	0	0	-1.11812	0	0	46.1809	36.68
DATA	176	3	6	66	1	DarkCorner	DarkCorner	10013.5	198	2.718045e+000	2.707960e+000	58	39	8.472736e+000	0	0	0	0	0	0	-4.86386	0	0	54.1152	38.7288
DATA	177	3	7	66	1	DarkCorner	DarkCorner	10039	198.043	2.707473e+000	2.697428e+000	59	36	9.177569e+000	0	0	0	0	0	0	-2.4215	0	0	46.8651	37.0172
DATA	178	3	8	66	1	DarkCorner	DarkCorner	10064.4	197.937	2.697327e+000	2.687320e+000	58.5	37	6.793176e+000	0	0	0	0	0	0	-3.49778	0	0	44.0646	36.1754
DATA	179	3	9	66	1	DarkCorner	DarkCorner	10088.6	197.75	2.688032e+000	2.678059e+000	53	36	8.027082e+000	0	0	0	0	0	0	-6.14303	0	0	39.4933	36.5584
DATA	180	3	10	66	1	DarkCorner	DarkCorner	10115.1	198.386	2.677922e+000	2.667987e+000	58	37	8.189917e+000	0	0	0	0	0	0	-5.15128	0	0	65	38.3396
DATA	181	3	11	0	0	A_64_P269465	ENSRNOT00000055742	10140.5	198.352	1.251195e+001	2.938673e+000	73	35	9.204303e+000	0	0	0	0	0	0	11.6539	1	0	57.5363	38.0545
DATA	182	3	12	0	0	A_64_P140776	NM_001114502	10165.4	198.029	2.530097e+003	2.530236e+002	2352.5	36	6.837121e+000	0	0	0	0	0	0	2363.95	1	1	46.1809	36.3654
DATA	183	3	13	0	0	A_42_P662683	NM_001108855	10191	198.271	6.140467e+003	6.140524e+002	5646	39	7.446279e+000	0	0	0	0	0	0	5755.11	1	1	46.8651	38.4828
DATA	184	3	14	0	0	A_44_P308687	NM_181389	10216.2	198.4	7.670261e+001	8.110211e+000	133	35.5	7.559019e+000	0	0	0	0	0	0	72.0963	1	1	49.1849	36.1923
DATA	185	3	15	0	0	A_42_P705255	NM_078622	10242	198.455	7.090476e+001	7.561707e+000	128	37	6.366883e+000	0	0	0	0	0	0	66.8301	1	1	55.8519	37.2414
DATA	186	3	16	0	0	A_44_P142472	NM_001106072	10267.1	198.616	3.935736e+003	3.935823e+002	3641	37	6.483233e+000	0	0	0	0	0	0	3718.86	1	1	48.5334	37.2653
DATA	187	3	17	0	0	A_64_P015946	NM_001009720	10292.7	197.985	6.577430e+002	6.582627e+001	683	34	7.953831e+000	0	0	0	0	0	0	622.897	1	1	45.4864	35.0755
DATA	188	3	18	0	0	A_64_P118698	ENSRNOT00000050943	10317.9	198.297	2.529972e+001	3.634694e+000	87	36	7.733658e+000	0	0	0	0	0	0	24.0104	1	1	45.4864	36.1864
DATA	189	3	19	0	0	A_42_P705302	NM_001107361	10343.3	198.338	3.516269e+003	3.516366e+002	3313	38	7.467287e+000	0	0	0	0	0	0	3343.4	1	1	48.5334	37.7119
DATA	190	3	20	0	0	A_64_P097547	NM_001100528	10368.9	198.477	2.820669e+001	3.836354e+000	88.5	35	7.285488e+000	0	0	0	0	0	0	26.8656	1	1	55.8519	35.619
DATA	191	3	21	0	0	A_42_P815485	NM_001013908	10394.1	198.352	4.178983e+003	4.179063e+002	4037	38	9.467954e+000	0	0	0	0	0	0	3985.94	1	1	47.8731	38.25
DATA	192	3	22	0	0	A_42_P526728	ENSRNOT00000060758	10419.4	198.529	8.642650e+002	8.646540e+001	860	38	9.060710e+000	0	0	0	0	0	0	825.358	1	1	47.5395	39.0588
DATA	193	3	23	0	0	A_42_P692317	NM_001107565	10444.8	198.535	4.400196e+002	4.407817e+001	476	40.5	8.102958e+000	0	0	0	0	0	0	420.625	1	1	47.5395	40.7593
DATA	194	3	24	0	0	A_44_P383949	NM_175593	10470.5	198.853	1.324615e+001	2.908004e+000	75	36	6.227342e+000	0	0	0	0	0	0	12.6723	1	1	46.8651	36.6538
DATA	195	3	25	0	0	A_42_P589570	NM_001014105	10495.9	198.5	9.627312e+001	9.968993e+000	154	34	6.962983e+000	0	0	0	0	0	0	92.1451	1	1	56.9804	35.6078
DATA	196	3	26	0	0	A_64_P012384	NM_001039338	10521.4	198.573	9.874449e+001	1.020768e+001	151.5	39.5	9.553556e+000	0	0	0	0	0	0	94.536	1	1	57.5363	38.2222
DATA	197	3	27	0	0	A_64_P088612	NM_053871	10546.4	198.479	1.901790e+003	1.901966e+002	1859	38	8.647883e+000	0	0	0	0	0	0	1820.74	1	1	48.2044	36.8824
DATA	198	3	28	0	0	A_42_P668072	NM_013130	10572.1	198.5	1.558616e+002	1.579948e+001	208	38	8.210332e+000	0	0	0	0	0	0	149.185	1	1	56.9804	38.5517
DATA	199	3	29	0	0	A_44_P624451	NM_001134605	10597.4	198.817	4.130075e+001	4.874264e+000	103	37	1.043521e+001	0	0	0	0	0	0	39.5144	1	1	47.5395	38.383
DATA	200	3	30	0	0	A_64_P118502	A_64_P118502	10622.6	198.838	1.785385e+002	1.804080e+001	230	39	6.455519e+000	0	0	0	0	0	0	170.695	1	1	46.8651	39.7451
DATA	201	3	31	0	0	A_43_P15761	NM_031608	10648.1	198.768	1.080553e+002	1.111230e+001	169	38	9.458860e+000	0	0	0	0	0	0	103.207	1	1	46.5243	39.7818
DATA	202	3	32	0	0	A_42_P667696	NM_001191800	10673.5	198.769	9.419493e+002	9.423070e+001	948.5	34	7.845168e+000	0	0	0	0	0	0	898.6	1	1	49.8279	35.3333
DATA	203	3	33	0	0	A_44_P899121	NM_001079941	10698.8	198.261	1.808015e+003	1.808202e+002	1766.5	35	6.649571e+000	0	0	0	0	0	0	1722.21	1	1	46.5243	35.1228
DATA	204	3	34	0	0	A_42_P642757	NM_031235	10724.1	198.62	2.015269e+003	2.015438e+002	1935	38	8.908514e+000	0	0	0	0	0	0	1916.48	1	1	47.2035	38.4364
DATA	205	3	35	0	0	A_64_P066694	NM_001033898	10749.4	198.943	3.054848e+001	4.017463e+000	94	38	8.734347e+000	0	0	0	0	0	0	28.9966	1	1	41.4593	37.434
DATA	206	3	36	0	0	A_42_P699201	TC594545	10775.4	198.573	1.726800e+001	3.133780e+000	80	37	1.066562e+001	0	0	0	0	0	0	16.3538	1	1	65	38.6607
DATA	207	3	37	0	0	A_42_P591944	NM_172093	10800.6	198.573	8.775854e+001	9.158974e+000	145	35	6.939140e+000	0	0	0	0	0	0	82.9159	1	1	57.5363	36.3396
DATA	208	3	38	0	0	A_44_P115293	NM_001108294	10826	198.545	1.107792e+002	1.138541e+001	160	38	7.946737e+000	0	0	0	0	0	0	104.393	1	1	55.8519	39.2759
DATA	209	3	39	1028	1	(+)E1A_r60_a107	E1A_r60_a107	10851.5	198.648	1.822737e+001	3.204502e+000	81.5	36	6.827666e+000	0	0	0	1	0	0	17.128	1	1	57.5363	37.75
DATA	210	3	40	0	0	A_44_P194531	NM_001007742	10876.6	198.573	1.428334e+002	1.452591e+001	199	37	7.324889e+000	0	0	0	0	0	0	133.815	1	1	57.5363	37.0339
DATA	211	3	41	0	0	A_43_P20016	NM_001107377	10902.1	198.657	7.749681e+001	8.190945e+000	133.5	36	8.503997e+000	0	0	0	0	0	0	72.3679	1	1	45.835	36.5238
DATA	212	3	42	0	0	A_64_P105550	A_64_P105550	10927.5	198.906	1.002080e+002	1.036815e+001	157	37.5	7.211806e+000	0	0	0	0	0	0	93.2583	1	1	44.4243	37.1087
DATA	213	3	43	0	0	A_42_P791872	NM_001135174	10952.6	198.972	4.148992e+003	4.149078e+002	3739	40	1.061717e+001	0	0	0	0	0	0	3847.45	1	1	48.2044	41.4043
DATA	214	3	44	0	0	A_42_P499273	NM_001012148	10978.2	198.897	9.031695e+002	9.035673e+001	879	35	9.376711e+000	0	0	0	0	0	0	834.31	1	1	46.5243	37.3654
DATA	215	3	45	0	0	A_64_P021960	NM_001109493	11004.1	198.915	2.128746e+002	2.145699e+001	261	37	8.778790e+000	0	0	0	0	0	0	195.847	1	1	46.8651	38.4194
DATA	216	3	46	0	0	A_64_P083725	A_64_P083725	11029.4	198.931	8.157365e+004	8.157366e+003	75746.5	36	7.435777e+000	0	0	0	0	0	0	74739.5	1	1	53.8203	36.6667
DATA	217	3	47	0	0	A_42_P524536	NM_012698	11054.5	199	1.732766e+002	1.753901e+001	218	36	6.030112e+000	0	0	0	0	0	0	158.089	1	1	48.5334	36.3673
DATA	218	3	48	0	0	A_64_P151675	NM_175755	11079.7	199.114	4.936864e+001	5.639721e+000	105	37	7.416654e+000	0	0	0	0	0	0	44.8446	1	1	46.8651	35.4348
DATA	219	3	49	0	0	A_64_P146914	A_64_P146914	11105.3	198.778	1.759807e+003	1.760021e+002	1666	37	6.450331e+000	0	0	0	0	0	0	1591.13	1	1	45.1352	37.2759
DATA	220	3	50	0	0	A_64_P115065	NM_001109631	11131.2	199.247	1.468695e+001	3.119516e+000	76	37	7.924279e+000	0	0	0	0	0	0	13.2167	1	1	48.5334	38.3043
DATA	221	3	51	0	0	A_42_P468771	NM_001107362	11156	198.912	2.570576e+003	2.570725e+002	2291	37	9.466266e+000	0	0	0	0	0	0	2302.38	1	1	46.8651	39.4314
DATA	222	3	52	0	0	A_44_P226461	NM_053798	11181.1	199.104	7.555635e+002	7.560742e+001	740.5	35.5	6.673615e+000	0	0	0	0	0	0	673.507	1	1	46.8651	35.44
DATA	223	3	53	0	0	A_64_P009440	NM_001109313	11206.8	198.722	5.097506e+000	2.838649e+000	67	38	7.639470e+000	0	0	0	0	0	0	4.52094	1	0	47.2035	37.1587
DATA	224	3	54	0	0	A_44_P282433	NM_033230	11232.2	199.103	3.696725e+002	3.707361e+001	383.5	37	7.841283e+000	0	0	0	0	0	0	326.245	1	1	46.5243	38.0714
DATA	225	3	55	0	0	A_42_P461003	NM_001044283	11257.3	199.261	5.933758e+003	5.933825e+002	5196.5	39	1.034457e+001	0	0	0	0	0	0	5210.68	1	1	47.2035	39.902
DATA	226	3	56	0	1	ETG10_236652	ETG10_236652	11283.1	199.386	1.525560e+001	3.219262e+000	77.5	35.5	8.319716e+000	0	0	0	0	0	0	13.328	1	1	65	36.9074
DATA	227	3	57	0	0	A_42_P529780	NM_138855	11308.2	198.677	2.983406e+002	2.996982e+001	326	35	8.255590e+000	0	0	0	1	0	0	259.31	1	1	45.4864	35.8125
DATA	228	3	58	0	0	A_42_P492976	NM_001126099	11333.6	198.929	1.787556e+002	1.810352e+001	215	34	7.679201e+000	0	0	0	0	0	0	154.586	1	1	47.2035	34.3929
DATA	229	3	59	0	0	A_42_P533865	NM_001127650	11359.4	199.427	2.679472e+001	3.932541e+000	84	37	7.420356e+000	0	0	0	0	0	0	23.0547	1	1	57.5363	38.4717
DATA	230	3	60	0	0	A_64_P026399	NM_001007626	11384.3	199.203	3.998510e+002	4.008961e+001	399	38	7.048549e+000	0	0	0	0	0	0	342.337	1	1	46.8651	38.54
DATA	231	3	61	0	0	A_64_P152543	XM_221353	11409.8	199.361	9.715486e+003	9.715529e+002	8217	37	7.882909e+000	0	0	0	0	0	0	8276.94	1	1	47.8731	36.4286
DATA	232	3	62	0	0	A_44_P203195	NM_053585	11435.2	199.466	9.916188e+002	9.920490e+001	883.5	39	6.703350e+000	0	0	0	0	0	0	840.697	1	1	48.2044	38.8431
DATA	233	3	63	0	0	A_42_P490612	NM_001108262	11460.7	199.338	3.538188e+003	3.538309e+002	2874.5	34	5.655988e+000	0	0	0	0	0	0	2985.26	1	1	48.5334	33.64
DATA	234	3	64	0	0	A_44_P457548	NM_001103351	11486.4	199.427	5.180622e+001	5.961267e+000	105	38	9.621879e+000	0	0	0	0	0	0	43.5051	1	1	57.5363	39.3585
DATA	235	3	65	0	0	A_42_P755665	NM_001013154	11511.5	199.333	7.221152e+002	7.227226e+001	663	39	7.290788e+000	0	0	0	0	0	0	603.703	1	1	49.1849	38.6875
DATA	236	3	66	0	0	A_42_P781999	NM_001106378	11536.7	199.444	1.124325e+004	1.124329e+003	9173	37.5	6.297268e+000	0	0	0	0	0	0	9359.16	1	1	48.5334	37.5625
DATA	237	3	67	0	0	A_44_P100289	ENSRNOT00000049514	11562.1	199.425	6.885764e+001	7.505985e+000	115	40	8.333627e+000	0	0	0	0	0	0	57.0804	1	1	48.5334	39.8519
DATA	238	3	68	0	0	A_42_P629599	ENSRNOT00000023101	11587.5	199.397	1.146781e+002	1.185359e+001	158	35.5	7.205327e+000	0	0	0	1	0	0	94.6886	1	1	48.5334	35.96
DATA	239	3	69	0	0	A_44_P192083	NM_001047088	11613.4	199.803	3.837301e+001	4.877391e+000	91	35.5	6.952704e+000	0	0	0	0	0	0	31.5667	1	1	47.5395	35.5652
DATA	240	3	70	0	0	A_42_P498066	NM_031136	11638.5	199.5	4.322138e+004	4.322139e+003	34478	37	9.030146e+000	0	0	0	0	0	0	35431.8	1	1	57.5363	37.2353
DATA	241	3	71	0	0	A_42_P519910	NM_001106292	11663.6	199.392	9.488843e+003	9.488891e+002	7844.5	34.5	9.024077e+000	0	0	0	0	0	0	7754.22	1	1	49.1849	35.3333
DATA	242	3	72	0	0	A_42_P657538	NM_001008362	11689.1	199.386	1.253090e+003	1.253459e+002	1054	37	8.549556e+000	0	0	0	0	0	0	1021.07	1	1	47.2035	37.5098
DATA	243	3	73	0	0	A_64_P030630	NM_001109610	11714.6	199.13	2.099528e+003	2.099749e+002	1775	38	8.945851e+000	0	0	0	0	0	0	1706.36	1	1	46.8651	37.8393
DATA	244	3	74	0	0	A_44_P126366	NM_001017456	11740.1	199.634	2.992479e+001	4.275480e+000	82.5	36	7.232549e+000	0	0	0	0	0	0	24.2704	1	1	47.5395	37.6364
DATA	245	3	75	0	0	A_43_P15627	ENSRNOT00000067029	11765.5	199.5	1.949606e+001	3.627575e+000	75.5	38	7.802022e+000	0	0	0	0	0	0	15.7838	1	1	57.5363	37.8868
DATA	246	3	76	0	0	A_42_P754784	CB328432	11790.7	199.557	2.882218e+003	2.882381e+002	2306	36	8.609569e+000	0	0	0	0	0	0	2330.31	1	1	47.5395	36.6429
DATA	247	3	77	66	1	DarkCorner	DarkCorner	11816.2	198.859	3.077824e+000	3.066405e+000	58	35	9.197173e+000	0	0	0	0	0	0	-1.85462	0	0	45.4864	35.8571
DATA	248	3	78	66	1	DarkCorner	DarkCorner	11841.6	199.573	3.078735e+000	3.067382e+000	59.5	39	6.904596e+000	0	0	0	0	0	0	0.166512	0	0	57.5363	39.566
DATA	249	3	79	66	1	DarkCorner	DarkCorner	11867.3	199.5	3.078516e+000	3.067314e+000	61.5	38	9.428198e+000	0	0	0	0	0	0	0.29607	0	0	57.5363	38.1273
DATA	250	3	80	66	1	DarkCorner	DarkCorner	11892.7	199.793	3.076419e+000	3.065565e+000	62	37.5	9.234240e+000	0	0	0	0	0	0	0.473511	0	0	43.3362	38.4048
DATA	251	3	81	66	1	DarkCorner	DarkCorner	11917.9	199.523	4.175275e+000	3.089870e+000	64	35.5	7.893590e+000	0	0	0	0	0	0	3.37762	1	0	65	36.0179
DATA	252	3	82	66	1	DarkCorner	DarkCorner	11943.4	199.573	3.067375e+000	3.058860e+000	60.5	37.5	8.947788e+000	0	0	0	0	0	0	1.07269	0	0	57.5363	37.7241
DATA	253	3	83	66	1	DarkCorner	DarkCorner	11969.1	200.018	3.059578e+000	3.050193e+000	59	35	9.943206e+000	0	0	0	0	0	0	0.889823	0	0	42.2201	35.9
DATA	254	3	84	66	1	DarkCorner	DarkCorner	11994	199.827	3.050409e+000	3.050883e+000	60.5	36	8.539367e+000	0	0	0	0	0	0	2.18379	0	0	47.8731	38.1373
DATA	255	3	85	66	1	DarkCorner	DarkCorner	12019.5	199.648	3.038905e+000	3.027631e+000	54	36	8.000809e+000	0	0	0	0	0	0	-3.31388	0	0	57.5363	35.9559
DATA	256	4	1	66	1	DarkCorner	DarkCorner	9899.33	205.5	2.764922e+000	2.754664e+000	60	38	9.962282e+000	0	0	0	0	0	0	-1.70172	0	0	65	39.4
DATA	257	4	2	66	1	DarkCorner	DarkCorner	9924.5	205.5	2.753573e+000	2.743357e+000	61	44.5	5.628744e+000	0	0	0	0	0	0	-0.959076	0	0	57.5363	44.2
DATA	258	4	3	66	1	DarkCorner	DarkCorner	9950.13	205.391	2.742225e+000	2.732051e+000	58	40	6.261807e+000	0	0	0	0	0	0	-2.82737	0	0	44.7812	38.9091
DATA	259	4	4	66	1	DarkCorner	DarkCorner	9974.95	205.667	2.731257e+000	2.721124e+000	60	38	7.535029e+000	0	0	0	0	0	0	-0.894355	0	0	43.7019	38.88
DATA	260	4	5	66	1	DarkCorner	DarkCorner	10000.7	205.5	2.720330e+000	2.710237e+000	56	39	7.750585e+000	0	0	0	0	0	0	-5.81225	0	0	57.5363	38.8438
DATA	261	4	6	66	1	DarkCorner	DarkCorner	10026.2	205.912	2.709529e+000	2.699477e+000	55	36	6.799594e+000	0	0	0	0	0	0	-7.42859	0	0	50.1463	38.2
DATA	262	4	7	66	1	DarkCorner	DarkCorner	10051.5	205.5	2.699448e+000	2.689433e+000	56	36	4.874423e+000	0	0	0	0	0	0	-5.38386	0	0	57.5363	36.48
DATA	263	4	8	66	1	DarkCorner	DarkCorner	10077	205.558	2.689447e+000	2.679469e+000	56	40	8.946976e+000	0	0	0	0	0	0	-5.26034	0	0	51.7088	41.125
DATA	264	4	9	66	1	DarkCorner	DarkCorner	10102.3	205.164	2.680059e+000	2.670116e+000	59	38	6.999229e+000	0	0	0	0	0	0	-4.15121	0	0	45.835	37.5641
DATA	265	4	10	0	0	A_44_P807031	NM_001108921	10127.6	205.36	2.617001e+003	2.617136e+002	2437.5	38	8.582272e+000	0	0	0	0	0	0	2435.76	1	1	48.8603	40.1538
DATA	266	4	11	0	0	A_64_P025813	NM_001009379	10153.1	205.5	2.662013e+000	2.652137e+000	58	35	1.196086e+001	0	0	0	0	0	0	-4.94621	0	0	65	39.3929
DATA	267	4	12	0	0	A_64_P130551	XM_001081846	10178.5	205.5	4.372328e+000	2.679779e+000	66.5	38	6.176057e+000	0	0	0	0	0	0	4.09579	1	0	57.5363	38.1667
DATA	268	4	13	0	0	A_42_P715449	NM_001033709	10203.9	205.5	7.971430e+002	7.975787e+001	795	39	8.554951e+000	0	0	0	1	0	0	748.935	1	1	56.9804	38.5172
DATA	269	4	14	0	0	A_42_P727584	NM_031622	10229	205.689	1.560138e+003	1.560360e+002	1468	38	9.014274e+000	0	0	0	0	0	0	1469.85	1	1	49.1849	38.9143
DATA	270	4	15	0	0	A_42_P600642	NM_001008386	10254.3	205.714	1.288090e+002	1.314505e+001	179	39	6.446805e+000	0	0	0	0	0	0	121.669	1	1	49.5074	39.1935
DATA	271	4	16	0	0	A_42_P669103	NM_001108329	10279.4	205.76	4.972362e+002	4.979238e+001	527	37	6.987674e+000	0	0	0	0	0	0	470.795	1	1	48.8603	36.4483
DATA	272	4	17	0	0	A_44_P715330	NM_001024966	10305.3	205.662	5.714231e+002	5.720188e+001	585	34	6.932439e+000	0	0	0	0	0	0	542.243	1	1	48.5334	33.9394
DATA	273	4	18	0	0	A_64_P083185	NM_001107199	10330.7	205.603	3.510830e+002	3.520479e+001	396	39	6.489307e+000	0	0	0	0	0	0	333.814	1	1	46.8651	39.5
DATA	274	4	19	0	0	A_64_P037313	ENSRNOT00000030164	10355.9	205.657	1.034603e+001	2.798451e+000	73	38	7.681673e+000	0	0	0	0	0	0	9.85452	1	0	45.835	37.6923
DATA	275	4	20	0	0	A_44_P321009	NM_012540	10382	206.167	2.605547e+000	2.595880e+000	60.5	37	7.902349e+000	0	0	0	0	0	0	-0.523161	0	0	46.1809	38.3667
DATA	276	4	21	0	0	A_42_P700753	FQ212883	10406.7	205.924	8.635944e+002	8.639835e+001	878	38	8.586550e+000	0	0	0	0	0	0	824.964	1	1	45.835	40.1071
DATA	277	4	22	0	0	A_44_P775974	NM_001024363	10432.1	205.611	2.599519e+000	2.597139e+000	64	38	9.330145e+000	0	0	0	0	0	0	1.85628	0	0	48.5334	39.5806
DATA	278	4	23	0	0	A_44_P503868	A_44_P503868	10457.5	206.273	2.150906e+003	2.151062e+002	2084	40	7.922704e+000	0	0	0	0	0	0	2058.8	1	1	46.5243	40.6667
DATA	279	4	24	0	0	A_64_P122541	A_64_P122541	10483.1	206.286	8.306160e+001	8.699355e+000	143.5	37	7.088456e+000	0	0	0	0	0	0	79.5547	1	1	45.1352	37.6061
DATA	280	4	25	0	0	A_64_P080967	NM_001033890	10508.3	205.775	5.692417e+003	5.692475e+002	5511	41	8.037556e+000	0	0	0	0	0	0	5453.82	1	1	47.2035	40.1333
DATA	281	4	26	0	0	A_44_P1056309	NM_001105912	10533.9	206.118	2.017146e+001	3.278523e+000	81	38.5	9.513995e+000	0	0	0	0	0	0	19.3294	1	1	39.4933	38.3667
DATA	282	4	27	0	0	A_44_P199514	NM_001005564	10559	205.797	9.751753e+002	9.755178e+001	1007	42	9.153412e+000	0	0	0	0	0	0	934.336	1	1	46.8651	40.5806
DATA	283	4	28	0	0	A_64_P097952	NM_001134962	10584.5	206	2.129686e+001	3.349875e+000	83	36.5	9.841795e+000	0	0	0	0	0	0	20.3983	1	1	65	37.9667
DATA	284	4	29	0	0	A_42_P813939	NM_001108741	10609.8	206	8.285995e+002	8.290034e+001	867	39.5	7.812416e+000	0	0	0	0	0	0	793.168	1	1	46.8651	38.9231
DATA	285	4	30	0	0	A_64_P006423	NM_012584	10635.3	206.25	1.324382e+001	2.908421e+000	75	39	7.180212e+000	0	0	0	0	0	0	12.6672	1	1	47.5395	39.8438
DATA	286	4	31	0	0	A_42_P670614	NM_001107097	10660.7	206.014	2.675697e+003	2.675822e+002	2566	38	9.330943e+000	0	0	0	1	0	0	2556.36	1	1	47.2035	38.931
DATA	287	4	32	0	0	A_64_P084088	NM_001011954	10686.1	206.214	1.122731e+002	1.152345e+001	173	36	8.119508e+000	0	0	0	0	0	0	107.126	1	1	46.8651	36.4063
DATA	288	4	33	0	0	A_64_P025643	XM_001073566	10711.6	205.781	3.171026e+002	3.181666e+001	358	35.5	6.742304e+000	0	0	0	0	0	0	302.073	1	1	44.7812	37.3438
DATA	289	4	34	0	0	A_42_P719607	NM_153721	10737.4	206.069	1.513950e+001	3.012595e+000	76	38.5	1.043563e+001	0	0	0	0	0	0	14.396	1	1	53.8203	41.1667
DATA	290	4	35	0	0	A_42_P843603	NM_052800	10762	206	3.749040e+002	3.758112e+001	409	39	9.792909e+000	0	0	0	0	0	0	355.787	1	1	46.8651	38.9118
DATA	291	4	36	0	0	A_44_P234129	NM_001135802	10787.5	205.942	8.272359e+001	8.676041e+000	140	42	1.081791e+001	0	0	0	0	0	0	78.3268	1	1	47.8731	41.7931
DATA	292	4	37	0	0	A_42_P701161	NM_001033666	10812.9	206.268	3.186200e+003	3.186307e+002	2977.5	39	6.218298e+000	0	0	0	0	0	0	3009.45	1	1	47.5395	38.7429
DATA	293	4	38	0	0	A_44_P1017335	NM_001108607	10838.4	206.267	3.993143e+003	3.993229e+002	3693.5	43	8.985291e+000	0	0	0	0	0	0	3761.37	1	1	49.1849	44.0714
DATA	294	4	39	0	0	A_44_P900209	CV121387	10864	206.662	3.518810e+001	4.397175e+000	94	37	7.977372e+000	0	0	0	0	0	0	33.0499	1	1	47.2035	38.0385
DATA	295	4	40	0	0	A_64_P037517	ENSRNOT00000014921	10889.4	206.297	1.458966e+001	3.020940e+000	77	36	8.002844e+000	0	0	0	0	0	0	13.6596	1	1	48.5334	36.575
DATA	296	4	41	0	0	A_64_P128528	NM_001106013	10914.7	205.94	9.747505e+002	9.751118e+001	959.5	34	7.989411e+000	0	0	0	0	0	0	909.538	1	1	45.835	34.8571
DATA	297	4	42	0	0	A_64_P378865	NM_001000706	10940.2	206.03	7.576615e+001	8.031183e+000	132	38	8.891691e+000	0	0	0	0	0	0	70.4482	1	1	46.1809	37.1071
DATA	298	4	43	0	0	A_42_P553960	NM_001107831	10965.5	206	4.019227e+003	4.019316e+002	3697.5	40.5	1.013265e+001	0	0	0	0	0	0	3723.33	1	1	48.5334	42.3214
DATA	299	4	44	0	0	A_42_P717654	XM_001063683	10990.6	205.901	2.196507e+003	2.196671e+002	2000	35	6.730465e+000	0	0	0	0	0	0	2026.98	1	1	47.8731	36.2286
DATA	300	4	45	0	0	A_44_P295118	NM_001107228	11016.4	206.427	1.780977e+002	1.801248e+001	226	38.5	8.275342e+000	0	0	0	0	0	0	163.687	1	1	57.5363	38.9412
DATA	301	4	46	0	0	A_64_P049057	ENSRNOT00000014519	11041.5	206.25	6.191934e+002	6.197844e+001	616	34	6.445744e+000	0	0	0	0	0	0	566.723	1	1	49.5074	35.619
DATA	302	4	47	0	0	A_42_P810287	NM_001004107	11067	206.384	7.522538e+002	7.527446e+001	753	38	5.617883e+000	0	0	0	0	0	0	685.515	1	1	48.8603	37.6818
DATA	303	4	48	0	0	A_42_P702729	NM_001107557	11092.4	206.254	9.346944e+002	9.350930e+001	902	41	4.947390e+000	0	0	0	0	0	0	847.938	1	1	47.5395	40.68
DATA	304	4	49	0	0	A_42_P811084	NM_173147	11117.9	206.042	1.051291e+003	1.051649e+002	995.5	39.5	6.670459e+000	0	0	0	0	0	0	949.288	1	1	46.8651	39.7895
DATA	305	4	50	0	0	A_64_P151473	A_64_P151473	11143.5	206.5	3.238622e+004	3.238623e+003	28899	36.5	7.738479e+000	0	0	0	0	0	0	29106.8	1	1	57.5363	38.3333
DATA	306	4	51	0	0	A_44_P134634	ENSRNOT00000000260	11169	206.348	6.679904e+001	7.231115e+000	121	40	9.353458e+000	0	0	0	0	0	0	59.7443	1	1	46.5243	39.7778
DATA	307	4	52	0	0	A_44_P178479	NM_001135039	11194	206.271	3.489862e+002	3.500937e+001	365.5	34	7.325959e+000	0	0	0	0	0	0	310.625	1	1	46.8651	35.3243
DATA	308	4	53	0	0	A_64_P317400	ENSRNOT00000068382	11219.5	206.5	1.117433e+001	3.011315e+000	71	39	1.003632e+001	0	0	0	0	0	0	9.89694	1	0	57.5363	38.9143
DATA	309	4	54	0	0	A_42_P781735	NM_053319	11245	206.545	5.504267e+004	5.504267e+003	48844.5	41	9.725739e+000	0	0	0	0	0	0	48505.9	1	1	55.8519	40.56
DATA	310	4	55	0	0	A_64_P144869	NM_017131	11270.3	206.429	1.119360e+002	1.154449e+001	162	39.5	8.918176e+000	0	0	0	0	0	0	98.1452	1	1	47.5395	40.2647
DATA	311	4	56	0	0	A_44_P445484	ENSRNOT00000049980	11295.5	206.5	6.773893e+002	6.779839e+001	662	39	8.108885e+000	0	0	0	0	0	0	590.961	1	1	46.5243	38.9412
DATA	312	4	57	0	0	A_42_P487832	NM_001108389	11320.9	206.232	9.304186e+002	9.308560e+001	841.5	39.5	9.463741e+000	0	0	0	0	0	0	807.557	1	1	46.5243	40.2059
DATA	313	4	58	0	0	A_42_P482829	NM_001108138	11346.2	206.211	4.157860e+002	4.167739e+001	412	39.5	7.956573e+000	0	0	0	0	0	0	359.068	1	1	47.5395	40.225
DATA	314	4	59	0	0	A_64_P101440	XM_001065775	11372	206.545	2.893138e+000	2.896344e+000	64	40	7.369555e+000	0	0	0	0	0	0	2.43869	0	0	55.8519	39.1034
DATA	315	4	60	0	0	A_64_P072268	NM_001002277	11397.5	206.333	7.158770e+002	7.164629e+001	684	38	8.353835e+000	0	0	0	0	0	0	612.012	1	1	49.1849	39.4857
DATA	316	4	61	0	0	A_42_P589190	NM_023104	11422.5	206.5	5.032086e+002	5.040499e+001	489.5	40	5.903845e+000	0	0	0	0	0	0	428.139	1	1	46.5243	38.8462
DATA	317	4	62	0	0	A_64_P027328	A_64_P027328	11448.2	206.62	3.316842e+002	3.329715e+001	340	38.5	7.102321e+000	0	0	0	0	0	0	280.837	1	1	47.5395	39.2647
DATA	318	4	63	0	0	A_42_P788541	NM_001106794	11473.4	206.643	2.439715e+003	2.439892e+002	2105	36	5.849489e+000	0	0	0	0	0	0	2056.06	1	1	47.5395	36.7037
DATA	319	4	64	0	0	A_42_P457003	NM_012802	11498.6	206.63	2.295972e+003	2.296162e+002	1964	36	8.643458e+000	0	0	0	0	0	0	1926.15	1	1	48.2044	39.069
DATA	320	4	65	0	0	A_64_P095695	A_64_P095695	11524.4	206.573	9.304571e+001	9.765712e+000	139	41	8.016105e+000	0	0	0	0	0	0	77.708	1	1	57.5363	39.4643
DATA	321	4	66	0	0	A_42_P463880	NM_001013927	11549.6	206.573	5.966320e+001	6.668238e+000	113	38.5	8.297622e+000	0	0	0	0	0	0	49.619	1	1	57.5363	37.4643
DATA	322	4	67	0	0	A_43_P20354	NM_001134574	11575.4	206.514	8.849521e+001	9.341082e+000	134	36	6.860873e+000	0	0	0	0	0	0	73.2946	1	1	47.8731	36.3438
DATA	323	4	68	0	0	A_64_P055958	ENSRNOT00000056114	11600.3	206.708	2.784286e+001	4.093999e+000	84.5	38	5.039689e+000	0	0	0	0	0	0	22.9747	1	1	48.2044	36.9615
DATA	324	4	69	0	0	A_64_P159044	ENSRNOT00000040690	11625.9	206.614	7.059354e+002	7.065778e+001	654	36	8.220747e+000	0	0	0	0	0	0	580.398	1	1	57.259	37.3929
DATA	325	4	70	0	0	A_44_P473234	ENSRNOT00000024858	11651.1	206.826	2.586867e+002	2.604460e+001	267	38	1.041315e+001	0	0	0	0	0	0	211.995	1	1	46.8651	40.4857
DATA	326	4	71	0	0	A_42_P797965	NM_001108497	11676.2	206.864	3.375975e+002	3.389555e+001	343.5	40.5	8.927068e+000	0	0	0	0	0	0	275.844	1	1	46.1809	40.7188
DATA	327	4	72	0	0	A_42_P592157	NM_001002828	11702.1	206.935	1.770866e+002	1.796760e+001	203	39	9.221804e+000	0	0	0	1	0	0	144.298	1	1	54.4085	38.3333
DATA	328	4	73	0	0	A_64_P016419	NM_001000622	11727.4	206.952	3.822263e+001	4.887809e+000	90	37	8.369622e+000	0	0	0	0	0	0	31.0734	1	1	44.0646	37.1333
DATA	329	4	74	0	0	A_44_P306863	XM_344447	11752.6	206.958	4.812257e+002	4.821928e+001	458	39	9.592681e+000	0	0	0	0	0	0	390.454	1	1	48.2044	39.6216
DATA	330	4	75	0	0	A_42_P471835	TC610276	11778.1	206.896	1.250583e+003	1.250957e+002	1055	38	7.377230e+000	0	0	0	0	0	0	1013.09	1	1	46.8651	38.4
DATA	331	4	76	0	1	ETG02_36680	ETG02_36680	11803.5	207	1.005110e+001	3.221426e+000	69	39	7.725003e+000	0	0	0	0	0	0	8.13337	1	0	54.1152	38.8649
DATA	332	4	77	66	1	DarkCorner	DarkCorner	11829.8	206.644	3.074288e+000	3.062883e+000	60	37	6.652094e+000	0	0	0	0	0	0	-2.09545	0	0	47.2035	37.5789
DATA	333	4	78	66	1	DarkCorner	DarkCorner	11854.5	207	4.423096e+000	3.094922e+000	64	43	9.543256e+000	0	0	0	0	0	0	3.57621	1	0	54.1152	42.5111
DATA	334	4	79	66	1	DarkCorner	DarkCorner	11880.5	206.814	3.073518e+000	3.062115e+000	57.5	41	7.025229e+000	0	0	0	0	0	0	-1.97761	0	0	42.9674	41.9231
DATA	335	4	80	66	1	DarkCorner	DarkCorner	11905.5	207	3.070631e+000	3.059239e+000	55.5	36	8.890538e+000	0	0	0	0	0	0	-2.22789	0	0	54.1152	36.2083
DATA	336	4	81	66	1	DarkCorner	DarkCorner	11930.5	207	3.066111e+000	3.062524e+000	60	40	8.482747e+000	0	0	0	0	0	0	1.76972	0	0	65	40.9032
DATA	337	4	82	66	1	DarkCorner	DarkCorner	11956	207	3.059620e+000	3.048269e+000	56	39	7.957684e+000	0	0	0	0	0	0	-1.95104	0	0	54.9904	37.5161
DATA	338	4	83	66	1	DarkCorner	DarkCorner	11981.5	207.352	3.050938e+000	3.039619e+000	56	38	9.762799e+000	0	0	0	0	0	0	-3.54277	0	0	57.5363	38.6957
DATA	339	4	84	66	1	DarkCorner	DarkCorner	12006.6	207.427	3.040534e+000	3.029253e+000	57	38	4.959954e+000	0	0	0	0	0	0	-1.45467	0	0	57.5363	37.7037
DATA	340	4	85	66	1	DarkCorner	DarkCorner	12032.7	207.029	3.027768e+000	3.016535e+000	58	34	7.433200e+000	0	0	0	0	0	0	-1.87349	0	0	46.5243	34.3272
DATA	341	5	1	66	1	DarkCorner	DarkCorner	9886.5	212.5	2.767415e+000	2.761429e+000	63	35	7.760772e+000	0	0	0	0	0	0	1.38077	0	0	57.5363	35.8182
DATA	342	5	2	66	1	DarkCorner	DarkCorner	9911.67	212.5	2.756104e+000	2.745878e+000	58	41	7.644606e+000	0	0	0	0	0	0	-2.80091	0	0	57.5363	42.24
DATA	343	5	3	66	1	DarkCorner	DarkCorner	9936.92	212.738	2.744778e+000	2.734595e+000	56.5	42	5.620105e+000	0	0	0	0	0	0	-4.86507	0	0	51.7088	41.4324
DATA	344	5	4	66	1	DarkCorner	DarkCorner	9963.46	212.487	2.733281e+000	2.723141e+000	56.5	41	6.457431e+000	0	0	0	0	0	0	-6.83905	0	0	49.5074	41.0714
DATA	345	5	5	66	1	DarkCorner	DarkCorner	9988	212.545	2.722732e+000	2.712630e+000	59	39	8.350922e+000	0	0	0	0	0	0	-4.23566	0	0	55.8519	39.5625
DATA	346	5	6	66	1	DarkCorner	DarkCorner	10014.1	212.477	2.711803e+000	2.701743e+000	54	40	8.147564e+000	0	0	0	0	0	0	-7.94921	0	0	52.3208	40.129
DATA	347	5	7	66	1	DarkCorner	DarkCorner	10039.3	212.814	2.701421e+000	2.691399e+000	54	36	8.904968e+000	0	0	0	0	0	0	-6.25235	0	0	43.7019	39.5385
DATA	348	5	8	66	1	DarkCorner	DarkCorner	10064.2	212.594	2.691663e+000	2.681677e+000	58	40	9.149838e+000	0	0	0	0	0	0	-4.77776	0	0	45.1352	42.0667
DATA	349	5	9	66	1	DarkCorner	DarkCorner	10089.5	212.648	2.681991e+000	2.672040e+000	58.5	40	8.789604e+000	0	0	0	0	0	0	-4.20744	0	0	57.5363	39.6667
DATA	350	5	10	0	0	A_43_P17919	XM_001070979	10115	212.545	2.950088e+001	3.974083e+000	90	39	8.073248e+000	0	0	0	0	0	0	27.4389	1	1	55.8519	39.9655
DATA	351	5	11	0	0	A_42_P826221	NM_012933	10140.1	212.648	3.314826e+003	3.314933e+002	3052	38	1.296115e+001	0	0	0	0	0	0	3093.37	1	1	47.8731	41.5161
DATA	352	5	12	0	0	A_64_P011524	NM_001194951	10165.8	212.726	5.305817e+002	5.312407e+001	559	37	6.820116e+000	0	0	0	0	0	0	496.736	1	1	51.4001	36.7742
DATA	353	5	13	0	0	A_44_P258417	NM_001009699	10191	212.929	6.602275e+001	7.109560e+000	126.5	40	5.359261e+000	0	0	0	0	0	0	61.9989	1	1	46.8651	39.6897
DATA	354	5	14	0	0	A_64_P164617	A_64_P164617	10216.5	213	2.779309e+004	2.779310e+003	25773	40	6.533783e+000	0	0	0	0	0	0	26174.3	1	1	54.1152	38.9032
DATA	355	5	15	0	0	A_42_P758933	NM_001106476	10241.8	213.194	4.662192e+003	4.662266e+002	4402	41	6.839792e+000	0	0	0	1	0	0	4402.45	1	1	47.5395	40.1
DATA	356	5	16	0	0	A_42_P573312	NM_001134761	10267.1	213.214	3.491084e+002	3.500874e+001	393	39.5	5.821974e+000	0	0	0	0	0	0	330.476	1	1	46.8651	40.1538
DATA	357	5	17	0	0	A_64_P096257	NM_001160228	10292.7	212.905	4.819131e+002	4.826196e+001	503.5	37	6.015784e+000	0	0	0	0	0	0	457.228	1	1	48.8603	36.7586
DATA	358	5	18	0	0	A_43_P15847	NM_178847	10318.5	213.096	5.195489e+001	5.811893e+000	113	37	7.463171e+000	0	0	0	0	0	0	49.3988	1	1	48.5334	36.0323
DATA	359	5	19	0	0	A_64_P139962	NM_001000675	10343.5	213	2.609726e+000	2.604660e+000	61.5	38.5	7.113543e+000	0	0	0	0	0	0	1.47648	0	0	54.1152	38.9412
DATA	360	5	20	0	0	A_64_P117474	NM_001000646	10369	213	2.605401e+000	2.599517e+000	64	37	8.939150e+000	0	0	0	0	0	0	1.3375	0	0	54.9904	37.3784
DATA	361	5	21	0	1	ERCC-00075_180	ERCC-00075_180	10394.4	212.882	2.068434e+001	3.316210e+000	81	39.5	9.146668e+000	0	0	0	0	0	0	19.7633	1	1	46.5243	41.3077
DATA	362	5	22	0	0	A_42_P740730	NM_001012136	10419.5	213	2.598589e+000	2.601363e+000	64	39	1.009829e+001	0	0	0	0	0	0	2.42831	0	0	48.5334	39.8462
DATA	363	5	23	0	0	A_42_P702258	NM_017227	10445	213.075	5.614321e+001	6.181430e+000	115	40.5	8.119074e+000	0	0	0	0	0	0	53.7609	1	1	46.8651	40.625
DATA	364	5	24	0	0	A_42_P668800	NM_001127553	10470.1	213.2	5.712819e+002	5.718662e+001	576	39	8.458041e+000	0	0	0	0	0	0	547.447	1	1	46.8651	40.3333
DATA	365	5	25	0	0	A_42_P842513	NM_031077	10495.6	212.735	2.175230e+003	2.175383e+002	2144	40	7.431129e+000	0	0	0	0	0	0	2085.41	1	1	46.5243	39.6897
DATA	366	5	26	0	0	A_64_P047697	NM_001161835	10520.8	213.176	2.247369e+002	2.262159e+001	278.5	41	9.435349e+000	0	0	0	0	0	0	215.524	1	1	48.2044	41.3226
DATA	367	5	27	0	0	A_42_P660036	NM_001134727	10546.6	212.833	1.089219e+002	1.119418e+001	170	39	9.240226e+000	0	0	0	0	0	0	104.454	1	1	46.1809	37.8966
DATA	368	5	28	0	0	A_64_P095050	A_64_P095050	10572.1	213.386	3.342556e+004	3.342557e+003	32094.5	39	8.196343e+000	0	0	0	0	0	0	32049.2	1	1	57.259	39.1765
DATA	369	5	29	0	0	A_42_P561835	ENSRNOT00000043937	10597.3	213.29	8.465604e+001	8.851263e+000	140	38	7.972710e+000	0	0	0	0	0	0	81.1309	1	1	47.2035	38.4444
DATA	370	5	30	0	0	A_64_P098774	ENSRNOT00000002068	10622.8	213.247	8.008101e+000	2.707281e+000	70.5	39	5.305857e+000	0	0	0	0	0	0	7.66909	1	0	48.5334	39.6786
DATA	371	5	31	0	0	A_64_P163184	NM_001107855	10648.1	213.382	2.249287e+002	2.264133e+001	273	41	7.084447e+000	0	0	0	0	0	0	215.204	1	1	46.1809	40.2424
DATA	372	5	32	0	0	A_42_P549675	NM_080577	10673.4	213.521	2.057992e+003	2.058156e+002	1974	34	8.931198e+000	0	0	0	0	0	0	1966.68	1	1	48.2044	35.875
DATA	373	5	33	0	0	A_64_P287740	NM_001127601	10698.6	213.238	2.085496e+001	3.329494e+000	81	37	8.841954e+000	0	0	0	0	0	0	19.9006	1	1	44.7812	38.3611
DATA	374	5	34	0	0	A_64_P059545	NM_053477	10724.4	213.406	2.133472e+003	2.133631e+002	2100	38	9.589865e+000	0	0	0	0	0	0	2032.4	1	1	47.5395	40.5862
DATA	375	5	35	0	0	A_44_P465856	NM_199398	10749.7	213.5	2.614445e+000	2.609983e+000	64	37.5	1.131683e+001	0	0	0	0	0	0	1.57139	0	0	65	40.625
DATA	376	5	36	0	0	A_42_P714075	NM_031723	10774.9	213.232	5.450704e+002	5.456951e+001	569	39	7.182116e+000	0	0	0	0	0	0	517.143	1	1	46.5243	37.871
DATA	377	5	37	0	0	A_42_P605265	NM_053677	10800.4	213.366	2.469454e+001	3.597862e+000	84	39	5.748529e+000	0	0	0	0	0	0	23.3741	1	1	48.2044	38.7407
DATA	378	5	38	0	0	A_64_P047401	NM_001009369	10825.7	213.417	1.471617e+003	1.471851e+002	1439.5	38	6.257097e+000	0	0	0	0	0	0	1389.33	1	1	48.5334	38.7143
DATA	379	5	39	0	0	A_64_P018891	A_64_P018891	10851.3	213.733	8.857516e+001	9.239915e+000	146.5	38	1.139513e+001	0	0	0	0	0	0	83.3892	1	1	48.8603	41.8148
DATA	380	5	40	0	0	A_64_P026297	NM_022583	10876.9	213.516	3.678306e+001	4.526937e+000	96	36.5	9.293429e+000	0	0	0	0	0	0	34.5229	1	1	43.7019	39.3333
DATA	381	5	41	0	0	A_43_P13508	NM_001015031	10902.3	213.5	4.408719e+001	5.142487e+000	104.5	37	8.207169e+000	0	0	0	0	0	0	41.2448	1	1	57.5363	36.8974
DATA	382	5	42	0	0	A_64_P077426	XM_001080794	10927.2	213.412	6.339656e+003	6.339712e+002	5917.5	38	8.068124e+000	0	0	0	0	0	0	5911.02	1	1	46.5243	37.1935
DATA	383	5	43	0	0	A_44_P370175	NM_031773	10952.9	213.5	4.444062e+001	5.182365e+000	100.5	40	8.919386e+000	0	0	0	0	0	0	41.2853	1	1	56.9804	40.8438
DATA	384	5	44	0	0	A_64_P084288	NM_001000496	10978.4	213.573	6.526397e+000	2.754520e+000	68	38	1.044380e+001	0	0	0	0	0	0	6.04001	1	0	57.5363	40.1111
DATA	385	5	45	0	0	A_44_P400936	A_44_P400936	11003.8	213.662	2.216048e+002	2.232275e+001	261	37	9.302457e+000	0	0	0	0	0	0	204.281	1	1	46.5243	38.9167
DATA	386	5	46	0	0	A_64_P019599	NM_012713	11029.3	213.5	1.510053e+002	1.533964e+001	199	39.5	9.473201e+000	0	0	0	0	0	0	138.622	1	1	57.5363	40.6923
DATA	387	5	47	0	0	A_44_P644356	AI556299	11054.6	213.779	2.963780e+001	4.015488e+000	89	38	8.146715e+000	0	0	0	0	0	0	27.0931	1	1	50.1463	39.1
DATA	388	5	48	0	0	A_64_P057076	A_64_P057076	11080.1	213.538	8.799486e+001	9.210692e+000	144	39	9.997735e+000	0	0	0	0	0	0	80.0818	1	1	50.1463	38.7083
DATA	389	5	49	0	0	A_64_P087392	NM_001108764	11105.3	213.597	1.103991e+002	1.137332e+001	169	41.5	6.043384e+000	0	0	0	0	0	0	100.021	1	1	46.5243	39.8214
DATA	390	5	50	0	0	A_44_P436604	NM_001025627	11130.6	213.573	1.064223e+001	2.945338e+000	71.5	43	8.007933e+000	0	0	0	0	0	0	9.59712	1	0	65	41.1429
DATA	391	5	51	0	0	A_43_P23200	NM_001107832	11156.2	213.57	2.929323e+002	2.942293e+001	316	40	9.029521e+000	0	0	0	0	0	0	262.902	1	1	58.0869	41.375
DATA	392	5	52	0	0	A_42_P515876	NM_031097	11181.3	213.725	3.139404e+002	3.151625e+001	339	40	9.723157e+000	0	0	0	0	0	0	280.418	1	1	46.8651	40.1613
DATA	393	5	53	0	0	A_44_P1047924	NM_053523	11206.7	213.729	1.744927e+003	1.745150e+002	1617.5	37	1.116892e+001	0	0	0	0	0	0	1550.94	1	1	46.8651	39.2432
DATA	394	5	54	0	0	A_44_P682668	NM_001014228	11232.4	213.573	1.039521e+002	1.076584e+001	154.5	41	8.106309e+000	0	0	0	0	0	0	91.9294	1	1	65	39.5926
DATA	395	5	55	0	0	A_64_P061489	NM_001108746	11257.6	213.573	1.438198e+001	3.160687e+000	74.5	43	9.544238e+000	0	0	0	0	0	0	12.6555	1	1	57.5363	42.3226
DATA	396	5	56	0	0	A_64_P047747	NM_182474	11282.8	214.323	1.021703e+003	1.022095e+002	971	43	8.416171e+000	0	0	0	0	0	0	894.649	1	1	45.4864	41.1429
DATA	397	5	57	0	0	A_64_P091163	NM_001107083	11308.5	213.648	5.352512e+001	6.060776e+000	106	37	9.183465e+000	0	0	0	0	0	0	46.6251	1	1	57.5363	40.0769
DATA	398	5	58	0	0	A_64_P133992	NM_001008825	11333.6	213.931	3.891906e+001	4.828156e+000	92	42	7.929566e+000	0	0	0	0	0	0	33.7343	1	1	53.8203	42.6563
DATA	399	5	59	0	0	A_42_P503768	NM_001009466	11359.5	214	1.491860e+002	1.519252e+001	188	37	8.025416e+000	0	0	0	0	0	0	128.651	1	1	54.1152	39.6765
DATA	400	5	60	0	0	A_44_P400346	ENSRNOT00000059540	11384.1	214.045	5.106333e+001	5.865401e+000	107	38	8.904529e+000	0	0	0	0	0	0	43.8224	1	1	46.8651	38.1724
DATA	401	5	61	0	0	A_64_P128438	NM_012591	11409.8	213.903	1.109370e+003	1.109749e+002	982.5	40	9.482163e+000	0	0	0	0	0	0	947.287	1	1	46.8651	39.2432
DATA	402	5	62	0	0	A_44_P531758	NM_012935	11435.1	214.099	1.432736e+004	1.432739e+003	11974	40	7.606388e+000	0	0	0	0	0	0	12175.6	1	1	46.8651	40.7143
DATA	403	5	63	0	0	A_43_P10257	NM_203335	11460.6	214	2.527113e+003	2.527282e+002	2179	38.5	6.255884e+000	0	0	0	0	0	0	2137.3	1	1	48.5334	38.3438
DATA	404	5	64	0	0	A_64_P011744	NM_001108789	11486.2	214.042	2.081259e+002	2.101950e+001	239.5	37	6.712426e+000	0	0	0	0	0	0	175.204	1	1	46.8651	38.16
DATA	405	5	65	0	0	A_44_P282794	NM_001107523	11511.5	214	2.721293e+001	4.017319e+000	85.5	37.5	6.876503e+000	0	0	0	0	0	0	22.8059	1	1	54.1152	38.0625
DATA	406	5	66	0	0	A_42_P463784	NM_001008526	11536.5	214	4.316187e+002	4.326379e+001	414	39	7.952156e+000	0	0	0	1	0	0	360.183	1	1	48.5334	37.7333
DATA	407	5	67	0	0	A_42_P630463	NM_022238	11561.9	214.104	1.731496e+002	1.756955e+001	202.5	39	6.621390e+000	0	0	0	1	0	0	143.897	1	1	46.8651	37.9697
DATA	408	5	68	0	0	A_64_P006728	NM_001108905	11587.7	214	1.463712e+003	1.464018e+002	1258	37	6.710608e+000	0	0	0	0	0	0	1211.56	1	1	50.4627	37.0323
DATA	409	5	69	0	0	A_44_P360629	NM_001000030	11613	214.212	7.086349e+001	7.696388e+000	119	37	8.231562e+000	0	0	0	0	0	0	58.4428	1	1	45.835	36.5172
DATA	410	5	70	0	0	A_64_P024620	NM_001006995	11638.1	214.104	1.031901e+004	1.031905e+003	8543	34	8.513509e+000	0	0	0	0	0	0	8481.3	1	1	46.8651	37.8125
DATA	411	5	71	0	0	A_64_P091194	ENSRNOT00000049254	11664.2	213.861	5.191795e+003	5.191883e+002	4324	40	8.824653e+000	0	0	0	0	0	0	4253.19	1	1	47.8731	39.6154
DATA	412	5	72	0	0	A_44_P334922	NM_022379	11689.5	214.352	3.042780e+000	3.031491e+000	59.5	42	8.915246e+000	0	0	0	0	0	0	-0.0225296	0	0	65	41.6333
DATA	413	5	73	0	0	A_42_P482051	XM_001059157	11714.6	214.427	5.276509e+002	5.285253e+001	469	41	9.048855e+000	0	0	0	1	0	0	430.018	1	1	57.5363	40.1034
DATA	414	5	74	0	0	A_42_P674742	XM_002726367	11739.9	213.778	3.639480e+003	3.639608e+002	2990	44	8.088408e+000	0	0	0	0	0	0	2959.37	1	1	45.4864	41.8788
DATA	415	5	75	0	0	A_64_P105211	XM_233310	11765.5	214.528	1.580058e+001	3.435684e+000	71	38	7.258958e+000	0	0	0	0	0	0	12.827	1	1	49.1849	38.6774
DATA	416	5	76	0	0	A_64_P058523	NM_134385	11791	214.455	5.191458e+000	3.098714e+000	64	41	6.615490e+000	0	0	0	0	0	0	4.20877	1	0	65	40
DATA	417	5	77	0	0	A_44_P586876	NM_001100805	11816.1	214.11	9.473416e+002	9.478349e+001	813	38	7.249103e+000	0	0	0	0	0	0	767.297	1	1	46.8651	38.1915
DATA	418	5	78	66	1	DarkCorner	DarkCorner	11841.2	214.308	3.070325e+000	3.058934e+000	60	41.5	8.024146e+000	0	0	0	0	0	0	-0.417188	0	0	49.8279	41.2105
DATA	419	5	79	66	1	DarkCorner	DarkCorner	11867.6	214.611	3.069839e+000	3.058450e+000	60.5	40	7.938359e+000	0	0	0	0	0	0	-0.73211	0	0	47.8731	41.6667
DATA	420	5	80	66	1	DarkCorner	DarkCorner	11892.5	214.5	3.067973e+000	3.058507e+000	60	38	9.198286e+000	0	0	0	0	0	0	0.87728	0	0	57.5363	37.6429
DATA	421	5	81	66	1	DarkCorner	DarkCorner	11917.9	214.5	3.064280e+000	3.052912e+000	58	37	9.541984e+000	0	0	0	0	0	0	-2.10298	0	0	56.9804	38.129
DATA	422	5	82	66	1	DarkCorner	DarkCorner	11943.4	214.427	3.058764e+000	3.047416e+000	57	39	7.341149e+000	0	0	0	0	0	0	-2.51763	0	0	57.5363	40.3226
DATA	423	5	83	66	1	DarkCorner	DarkCorner	11968.5	214.647	3.051288e+000	3.040355e+000	60	35	8.457369e+000	0	0	0	0	0	0	0.395324	0	0	46.5243	38.2069
DATA	424	5	84	66	1	DarkCorner	DarkCorner	11994.1	214.5	3.041841e+000	3.030555e+000	57	41	9.893264e+000	0	0	0	0	0	0	-2.37181	0	0	56.9804	42.72
DATA	425	5	85	66	1	DarkCorner	DarkCorner	12019.1	214.391	3.030553e+000	3.019309e+000	57	37	7.217500e+000	0	0	0	0	0	0	-2.26937	0	0	52.3208	37.1
DATA	426	6	1	66	1	DarkCorner	DarkCorner	9899.5	220	2.758052e+000	2.747819e+000	59.5	38	9.422933e+000	0	0	0	0	0	0	-1.74282	0	0	54.1152	38.3333
DATA	427	6	2	66	1	DarkCorner	DarkCorner	9924.16	219.667	2.747281e+000	2.737091e+000	62	44	6.195214e+000	0	0	0	0	0	0	0.0378041	0	0	46.5243	43.4545
DATA	428	6	3	66	1	DarkCorner	DarkCorner	9950.54	220.354	2.735442e+000	2.725294e+000	56.5	41	6.512316e+000	0	0	0	0	0	0	-6.42796	0	0	48.8603	40.5
DATA	429	6	4	66	1	DarkCorner	DarkCorner	9975.64	219.899	2.724863e+000	2.715616e+000	64	39	8.928792e+000	0	0	0	0	0	0	0.624637	0	0	46.5243	39.84
DATA	430	6	5	66	1	DarkCorner	DarkCorner	10000.4	219.904	2.714424e+000	2.704354e+000	55	43	9.019735e+000	0	0	0	0	0	0	-4.59529	0	0	48.2044	41.9118
DATA	431	6	6	66	1	DarkCorner	DarkCorner	10026.4	220.069	2.703706e+000	2.693675e+000	61	36	7.768187e+000	0	0	0	0	0	0	-2.35125	0	0	53.8203	38.037
DATA	432	6	7	66	1	DarkCorner	DarkCorner	10051.4	220.062	2.693729e+000	2.683735e+000	58.5	42	1.096181e+001	0	0	0	0	0	0	-2.53838	0	0	44.7812	43.1935
DATA	433	6	8	66	1	DarkCorner	DarkCorner	10076.9	220.386	2.683778e+000	2.673821e+000	59	38.5	8.421439e+000	0	0	0	0	0	0	-3.85546	0	0	57.259	39.5714
DATA	434	6	9	0	0	A_64_P034324	NM_001108282	10102.4	220.427	3.888890e+001	4.714057e+000	98	39	8.933247e+000	0	0	0	0	0	0	36.149	1	1	65	40.1071
DATA	435	6	10	0	0	A_64_P071506	ENSRNOT00000025007	10127.6	220.427	1.451759e+001	3.026382e+000	74	38	8.338065e+000	0	0	0	0	0	0	13.5401	1	1	57.5363	39.76
DATA	436	6	11	0	0	A_64_P050705	NM_001106061	10153.1	220.386	1.118518e+002	1.149408e+001	165.5	36	7.708138e+000	0	0	0	0	0	0	104.66	1	1	65	36.1538
DATA	437	6	12	0	0	A_64_P032242	NM_001008898	10178.5	220.352	2.648501e+000	2.639358e+000	63	40	6.393105e+000	0	0	0	0	0	0	0.563582	0	0	57.5363	40.2222
DATA	438	6	13	0	0	A_42_P730320	NM_001013877	10203.6	220.427	2.778429e+001	3.826494e+000	87	39	5.113089e+000	0	0	0	0	0	0	26.1539	1	1	65	38.1667
DATA	439	6	14	0	0	A_64_P123073	A_64_P123073	10229.4	220.427	2.179312e+002	2.195049e+001	272.5	40	6.080535e+000	0	0	0	0	0	0	205.717	1	1	57.5363	40.4828
DATA	440	6	15	0	0	A_64_P064709	NM_001166303	10254.6	220.427	5.685617e+001	6.259007e+000	115.5	36.5	6.838466e+000	0	0	0	0	0	0	53.806	1	1	57.5363	38.2692
DATA	441	6	16	0	0	A_44_P123381	NM_013012	10280	220.455	5.608485e+000	2.670392e+000	68	38	4.740300e+000	0	0	0	0	0	0	5.32024	1	0	65	38.5517
DATA	442	6	17	0	0	A_44_P557487	NM_053617	10305.2	220.382	1.693110e+001	3.107064e+000	79	37	6.529338e+000	0	0	0	0	0	0	16.0955	1	1	46.5243	36.0323
DATA	443	6	18	0	0	A_64_P084971	NM_017007	10330.7	220.5	2.091189e+004	2.091191e+003	19496.5	37	7.663993e+000	0	0	0	0	0	0	19919.3	1	1	57.5363	36.5667
DATA	444	6	19	0	0	A_42_P770556	NM_033096	10356.2	220.417	2.924306e+003	2.924421e+002	2801	36	5.882531e+000	0	0	0	1	0	0	2790.4	1	1	47.8731	36.3333
DATA	445	6	20	0	0	A_64_P023381	XM_001073278	10381.5	220.5	5.194735e+001	5.805277e+000	110	37.5	9.279215e+000	0	0	0	0	0	0	49.6448	1	1	57.5363	39.6563
DATA	446	6	21	0	0	A_64_P059217	NM_053667	10407.1	220.477	1.995411e+002	2.012126e+001	255	44	1.236165e+001	0	0	0	0	0	0	190.948	1	1	55.8519	44.8966
DATA	447	6	22	0	0	A_44_P286215	NM_001008885	10432.5	220.722	1.614164e+002	1.634735e+001	211	41	9.364565e+000	0	0	0	0	0	0	154.636	1	1	48.2044	40.8485
DATA	448	6	23	0	0	A_64_P138056	A_64_P138056	10457.7	220.5	3.228269e+002	3.238587e+001	369	38	6.910861e+000	0	0	0	0	0	0	309.52	1	1	50.4627	38
DATA	449	6	24	0	0	A_44_P280799	NM_001000654	10483.3	220.5	7.330376e+000	2.683590e+000	69	39	8.126160e+000	0	0	0	0	0	0	7.03256	1	0	57.5363	39.9655
DATA	450	6	25	0	0	A_64_P111599	NM_001191586	10508.4	220.36	1.896503e+002	1.913980e+001	244.5	42	7.889233e+000	0	0	0	0	0	0	182.009	1	1	48.8603	43
DATA	451	6	26	0	0	A_64_P088635	ENSRNOT00000059643	10534	220.545	1.249305e+001	2.866755e+000	72	40	9.197004e+000	0	0	0	0	0	0	11.9916	1	0	55.8519	39.0571
DATA	452	6	27	0	0	A_64_P042332	NM_021860	10559.4	220.573	2.590100e+000	2.580490e+000	62	38	8.041559e+000	0	0	0	0	0	0	-1.92781	0	0	65	37
DATA	453	6	28	0	0	A_42_P599080	NM_053753	10584.6	220.573	5.895659e+001	6.436021e+000	119	40	9.830617e+000	0	0	0	0	0	0	56.5645	1	1	57.5363	39.8889
DATA	454	6	29	0	0	A_44_P576954	NM_001106645	10609.8	220.761	2.712130e+002	2.724401e+001	322	39	5.487139e+000	0	0	0	0	0	0	260.061	1	1	46.8651	38.25
DATA	455	6	30	0	0	A_64_P046687	A_64_P046687	10635.2	220.824	1.901247e+003	1.901423e+002	1865.5	37	6.916262e+000	0	0	0	0	0	0	1821.56	1	1	48.2044	38.3125
DATA	456	6	31	0	0	A_42_P694928	NM_001109046	10661	220.545	1.175393e+002	1.203545e+001	180	38	8.008187e+000	0	0	0	0	0	0	112.486	1	1	55.8519	38.8519
DATA	457	6	32	0	0	A_64_P032811	NM_001134575	10686.2	220.776	3.452298e+001	4.316578e+000	94	37	6.838001e+000	0	0	0	0	0	0	32.9964	1	1	49.1849	37.2703
DATA	458	6	33	0	0	A_64_P141070	ENSRNOT00000058701	10711.9	220.471	5.697292e+001	6.260617e+000	117	40	7.903222e+000	0	0	0	0	0	0	54.3659	1	1	47.5395	40.2333
DATA	459	6	34	0	0	A_64_P093462	NM_001108129	10736.9	220.757	5.577932e+003	5.577992e+002	5331	42	1.192057e+001	0	0	0	0	0	0	5313.46	1	1	46.5243	43.5
DATA	460	6	35	0	0	A_42_P799306	ENSRNOT00000015782	10762.3	220.783	3.083014e+001	4.036338e+000	91	42	8.801472e+000	0	0	0	0	0	0	29.3089	1	1	47.2035	41.8182
DATA	461	6	36	0	0	A_42_P726743	NM_001108985	10787.6	220.761	5.305646e+002	5.312067e+001	572	39	8.511725e+000	0	0	0	0	0	0	503.255	1	1	46.5243	36.871
DATA	462	6	37	0	0	A_44_P228341	NM_001025701	10812.9	220.768	1.158444e+003	1.158739e+002	1115.5	40	5.862676e+000	0	0	0	0	0	0	1096.1	1	1	46.5243	39.125
DATA	463	6	38	0	0	A_42_P571433	NM_031059	10838.5	221	8.981163e+002	8.984997e+001	901	38	8.492100e+000	0	0	0	0	0	0	847.504	1	1	48.5334	39.5172
DATA	464	6	39	0	0	A_44_P132783	NM_214833	10864.1	220.614	6.295585e+001	6.823771e+000	121	40	1.038412e+001	0	0	0	0	0	0	59.2313	1	1	57.259	41.4828
DATA	465	6	40	0	0	A_44_P119215	NM_001108941	10888.7	221.516	3.539142e+001	4.415349e+000	92.5	38	9.235178e+000	0	0	0	0	0	0	33.2011	1	1	44.4243	38.7667
DATA	466	6	41	0	0	A_44_P124259	XM_345871	10914.6	220.931	1.986137e+001	3.311026e+000	83	37	8.213814e+000	0	0	0	0	0	0	18.5679	1	1	53.8203	35.7813
DATA	467	6	42	0	0	A_44_P422063	NM_001107631	10939.9	220.889	1.173472e+002	1.203209e+001	173	40.5	8.104927e+000	0	0	0	0	0	0	109.321	1	1	45.4864	40.3529
DATA	468	6	43	0	0	A_44_P1033023	NM_013063	10965.3	220.971	3.358843e+003	3.358949e+002	3109	39	7.672758e+000	0	0	0	0	0	0	3117.64	1	1	46.1809	39.0606
DATA	469	6	44	0	0	A_64_P121618	NM_001134542	10990.9	220.985	1.580980e+002	1.603512e+001	207	35	6.909262e+000	0	0	0	0	0	0	146.174	1	1	46.8651	35.9375
DATA	470	6	45	0	0	A_64_P042188	ENSRNOT00000034890	11016.5	221.09	2.718618e+003	2.718751e+002	2569.5	38	6.955905e+000	0	0	0	0	0	0	2503.42	1	1	45.835	37.3333
DATA	471	6	46	0	0	A_42_P561616	AI234869	11041.6	220.912	4.321536e+002	4.329967e+001	446.5	39	7.217373e+000	0	0	0	0	0	0	396.294	1	1	46.5243	39.0952
DATA	472	6	47	0	0	A_42_P588606	NM_001134544	11067.4	220.986	1.231868e+002	1.261381e+001	170	41	8.244887e+000	0	0	0	0	0	0	112.471	1	1	48.2044	42.5667
DATA	473	6	48	0	0	A_42_P568897	NM_001005563	11092.7	220.988	3.233346e+002	3.244806e+001	359.5	39	9.118488e+000	0	0	0	0	0	0	293.898	1	1	49.1849	37.0357
DATA	474	6	49	0	0	A_64_P096356	NM_012640	11118	221	1.810122e+004	1.810124e+003	16447	43	6.025711e+000	0	0	0	0	0	0	16378.3	1	1	54.9904	41.3667
DATA	475	6	50	0	0	A_64_P006418	A_64_P006418	11143.7	220.88	5.881118e+003	5.881183e+002	5390	41.5	7.384747e+000	0	0	0	0	0	0	5296.07	1	1	48.8603	41.5
DATA	476	6	51	0	0	A_64_P156389	A_64_P156389	11168.8	220.913	5.440303e+001	6.101855e+000	111	41	8.063991e+000	0	0	0	0	0	0	48.7598	1	1	46.5243	41.1935
DATA	477	6	52	0	0	A_42_P576446	NM_001107673	11194.1	220.672	2.969235e+003	2.969365e+002	2604	39	1.043696e+001	0	0	0	0	0	0	2648.26	1	1	45.1352	39.3889
DATA	478	6	53	0	0	A_64_P022804	A_64_P022804	11219.5	221.299	9.387268e+002	9.391414e+001	895	39	8.787586e+000	0	0	0	0	0	0	833.206	1	1	52.0157	40.3103
DATA	479	6	54	0	0	A_64_P162356	A_64_P162356	11244.7	221.1	3.975280e+003	3.975379e+002	3550	41	7.631152e+000	0	0	0	0	0	0	3510.88	1	1	47.2035	39.8
DATA	480	6	55	0	0	A_44_P266776	NM_199388	11270.1	221.232	4.324246e+002	4.333420e+001	447	41	7.254831e+000	0	0	0	0	0	0	380.004	1	1	46.5243	40.1515
DATA	481	6	56	0	0	A_64_P035066	NM_001008960	11295.6	221.427	5.831119e+000	2.891940e+000	67	43	8.747554e+000	0	0	0	0	0	0	5.09847	1	0	65	40.3448
DATA	482	6	57	0	0	A_64_P072728	NM_001100667	11321	220.723	2.926537e+003	2.926676e+002	2632	42	9.545207e+000	0	0	0	0	0	0	2545.65	1	1	45.4864	42.1951
DATA	483	6	58	0	0	A_64_P028446	NM_001106007	11346.1	221.086	8.719358e+002	8.724051e+001	805	43	7.953350e+000	0	0	0	0	0	0	754.738	1	1	46.8651	41.975
DATA	484	6	59	0	0	A_44_P251212	NM_031715	11371.7	221.222	1.898298e+004	1.898300e+003	16006	37	9.728836e+000	0	0	0	0	0	0	16349.2	1	1	47.5395	39.3103
DATA	485	6	60	0	0	A_42_P818240	NM_001108334	11397.1	220.956	6.774821e+003	6.774883e+002	5706	38	8.975982e+000	0	0	0	0	0	0	5805.79	1	1	46.8651	39.0556
DATA	486	6	61	0	0	A_64_P023122	NM_001080208	11422.6	221.427	1.735060e+001	3.382865e+000	77	40	8.442354e+000	0	0	0	0	0	0	14.7972	1	1	57.5363	40.76
DATA	487	6	62	0	0	A_44_P217821	NM_001107292	11447.9	221.243	2.032657e+002	2.053495e+001	234	39	7.240264e+000	0	0	0	0	0	0	172.522	1	1	46.5243	39.4167
DATA	488	6	63	0	0	A_64_P007372	NM_001105895	11473.9	221.342	1.797131e+001	3.438929e+000	75	39	6.637625e+000	0	0	0	0	0	0	15.1804	1	1	48.5334	38.4839
DATA	489	6	64	0	0	A_42_P792382	NM_017257	11498.7	221.506	2.636751e+003	2.636915e+002	2268	35	8.410582e+000	0	0	0	0	0	0	2217.46	1	1	50.4627	37.2593
DATA	490	6	65	0	0	A_43_P12232	NM_022512	11524.2	221.373	1.036820e+003	1.037242e+002	920	39	7.514287e+000	0	0	0	0	0	0	868.086	1	1	45.835	38.7419
DATA	491	6	66	0	0	A_64_P158475	A_64_P158475	11549.6	221.427	5.139746e+003	5.139832e+002	4362	39	8.057521e+000	0	0	0	0	0	0	4285.21	1	1	51.0895	39.069
DATA	492	6	67	0	0	A_64_P043361	NM_001197023	11575.1	221.5	6.731470e+001	7.362624e+000	117	36.5	7.095270e+000	0	0	0	0	0	0	55.897	1	1	56.9804	37
DATA	493	6	68	0	0	A_64_P080851	NM_001105753	11600.7	221.466	3.102843e+001	4.311796e+000	86	38	8.491975e+000	0	0	0	0	0	0	25.667	1	1	48.5334	36.6364
DATA	494	6	69	0	0	A_44_P129330	NM_001107505	11625.6	221.36	4.742344e+002	4.751852e+001	451	37.5	8.372712e+000	0	0	0	0	0	0	390.915	1	1	48.8603	39.3667
DATA	495	6	70	0	0	A_64_P008827	NM_001014012	11650.9	221.464	8.391588e+002	8.397001e+001	777	40	8.197933e+000	0	0	0	0	0	0	689.476	1	1	47.5395	40.5122
DATA	496	6	71	0	0	A_64_P026222	NM_001101019	11676.7	221.35	5.713881e+001	6.464533e+000	107	42	8.685637e+000	0	0	0	0	0	0	46.8038	1	1	44.0646	41.8824
DATA	497	6	72	0	0	A_64_P067749	NM_012659	11702.1	221.5	3.023223e+004	3.023225e+003	24229	42	9.092121e+000	0	0	0	0	0	0	24698.7	1	1	56.9804	40
DATA	498	6	73	0	0	A_44_P362981	NM_145878	11727.5	221.5	1.939728e+004	1.939731e+003	15355.5	42	8.646275e+000	0	0	0	0	0	0	15810.3	1	1	57.5363	40.875
DATA	499	6	74	0	0	A_64_P146654	NM_031698	11752.7	221.338	1.357576e+003	1.357918e+002	1170	43	7.913955e+000	0	0	0	0	0	0	1104.37	1	1	48.5334	42.4545
DATA	500	6	75	0	0	A_42_P548800	NM_001007696	11778	221.343	2.199179e+003	2.199390e+002	1782	39	7.205895e+000	0	0	0	0	0	0	1786.26	1	1	45.4864	39.2703
DATA	501	6	76	0	0	A_44_P310581	BG673348	11803.6	221.573	1.898700e+003	1.898945e+002	1576	40	6.863223e+000	0	0	0	0	0	0	1540.54	1	1	57.5363	39.8438
DATA	502	6	77	0	0	A_64_P062269	XM_001067531	11828.9	221.649	1.732467e+002	1.759185e+001	201	39	6.054824e+000	0	0	0	0	0	0	140.479	1	1	48.8603	39.825
DATA	503	6	78	66	1	DarkCorner	DarkCorner	11854.6	222.041	4.297423e+000	3.084678e+000	64	40	8.425426e+000	0	0	0	0	0	0	3.48433	1	0	49.1849	41.6341
DATA	504	6	79	66	1	DarkCorner	DarkCorner	11879.6	221.573	3.065122e+000	3.053750e+000	58	39	8.289933e+000	0	0	0	0	0	0	-2.04492	0	0	57.5363	40.6333
DATA	505	6	80	66	1	DarkCorner	DarkCorner	11905.4	221.573	3.062246e+000	3.050885e+000	56.5	39	1.177326e+001	0	0	0	0	0	0	-4.38441	0	0	57.5363	41.0741
DATA	506	6	81	66	1	DarkCorner	DarkCorner	11930.6	221.573	3.057670e+000	3.046326e+000	59	39.5	7.895861e+000	0	0	0	0	0	0	-0.208175	0	0	57.5363	40.2308
DATA	507	6	82	66	1	DarkCorner	DarkCorner	11955.8	221.408	3.051342e+000	3.040021e+000	58	40	7.387748e+000	0	0	0	0	0	0	-1.34582	0	0	47.8731	40.3103
DATA	508	6	83	66	1	DarkCorner	DarkCorner	11981.5	221.329	3.042831e+000	3.031542e+000	57	39	5.468897e+000	0	0	0	0	0	0	-2.50648	0	0	48.8603	39.2963
DATA	509	6	84	66	1	DarkCorner	DarkCorner	12007.1	221.6	3.032105e+000	3.020856e+000	54.5	38	7.336503e+000	0	0	0	0	0	0	-4.56662	0	0	53.5237	39.4583
DATA	510	6	85	66	1	DarkCorner	DarkCorner	12031.9	221.707	3.019724e+000	3.008521e+000	58	33	7.595516e+000	0	0	0	0	0	0	-1.50802	0	0	50.7771	33.7245
DATA	511	7	1	66	1	DarkCorner	DarkCorner	9886.3	226.711	2.760765e+000	2.750523e+000	61	36	8.108396e+000	0	0	0	0	0	0	-1.682	0	0	50.1463	36.5676
DATA	512	7	2	66	1	DarkCorner	DarkCorner	9911.46	227.286	2.749396e+000	2.739195e+000	61	41	6.994836e+000	0	0	0	0	0	0	-1.27199	0	0	51.7088	40.6857
DATA	513	7	3	66	1	DarkCorner	DarkCorner	9937.41	226.838	2.738276e+000	2.728117e+000	58	44	6.166026e+000	0	0	0	0	0	0	-4.73786	0	0	48.5334	43.075
DATA	514	7	4	66	1	DarkCorner	DarkCorner	9963.03	226.775	2.727285e+000	2.717166e+000	59	41	7.677778e+000	0	0	0	0	0	0	-3.74073	0	0	46.8651	40.3448
DATA	515	7	5	66	1	DarkCorner	DarkCorner	9988	227.455	2.716459e+000	2.706381e+000	58	41	9.653734e+000	0	0	0	0	0	0	-3.1271	0	0	55.8519	40.8621
DATA	516	7	6	66	1	DarkCorner	DarkCorner	10013.5	227.5	2.705927e+000	2.695887e+000	59	41.5	7.559343e+000	0	0	0	0	0	0	-5.38287	0	0	65	41.2105
DATA	517	7	7	66	1	DarkCorner	DarkCorner	10038.5	227.667	2.695820e+000	2.685818e+000	56.5	43.5	1.101586e+001	0	0	0	0	0	0	-4.88909	0	0	51.7088	43.6429
DATA	518	7	8	66	1	DarkCorner	DarkCorner	10063.9	227.171	2.686114e+000	2.676148e+000	56	38	7.127110e+000	0	0	0	0	0	0	-6.55753	0	0	51.0895	39.0645
DATA	519	7	9	0	0	A_64_P051297	NM_001107416	10089.6	226.862	1.763468e+003	1.763669e+002	1706	41	9.690781e+000	0	0	0	0	0	0	1637.83	1	1	45.4864	41.7917
DATA	520	7	10	0	0	A_64_P162378	A_64_P162378	10115	227.455	2.762793e+004	2.762794e+003	25128	40	9.428784e+000	0	0	0	0	0	0	25749.9	1	1	55.8519	40.6471
DATA	521	7	11	0	0	A_64_P030634	ENSRNOT00000042606	10140.4	227.103	6.380371e+001	6.908287e+000	121	37.5	8.245166e+000	0	0	0	0	0	0	59.6606	1	1	46.8651	37.5
DATA	522	7	12	0	0	A_64_P110009	NM_024392	10165.6	227.392	3.448201e+003	3.448302e+002	3203	40	3.937004e+000	0	0	0	0	0	0	3234.48	1	1	49.1849	40
DATA	523	7	13	0	0	A_42_P618145	NM_001080783	10190.9	227.5	1.751341e+003	1.751539e+002	1640.5	39.5	6.480266e+000	0	0	0	0	0	0	1647.72	1	1	49.8279	40.0769
DATA	525	7	15	0	0	A_64_P101770	NM_001000074	10241.9	227.5	2.627742e+000	2.626238e+000	63.5	41	7.470632e+000	0	0	0	0	0	0	1.96707	0	0	56.9804	40.8966
DATA	526	7	16	0	0	A_42_P735934	NM_001105729	10267.2	227.639	3.384066e+003	3.384167e+002	3295	39.5	5.109041e+000	0	0	0	0	0	0	3209.26	1	1	47.8731	39.3667
DATA	528	7	18	0	0	A_42_P718331	NM_133522	10318.2	227.471	7.745273e+002	7.749637e+001	794	39	5.546712e+000	0	0	0	0	0	0	737.697	1	1	47.5395	38.1379
DATA	529	7	19	0	0	A_64_P118054	NM_001037651	10343.6	227.573	1.215596e+001	2.866022e+000	73	37	6.027950e+000	0	0	0	0	0	0	11.5995	1	0	57.5363	37.5185
DATA	530	7	20	0	0	A_64_P044613	A_64_P044613	10369	227.545	6.739497e+004	6.739497e+003	64595	36	8.810935e+000	0	0	0	0	0	0	64415	1	1	55.8519	39.1515
DATA	531	7	21	0	0	A_43_P13241	NM_134334	10394.4	227.573	1.331536e+004	1.331539e+003	12491.5	41	8.461154e+000	0	0	0	0	0	0	12744.7	1	1	57.5363	41.6552
DATA	532	7	22	0	0	A_44_P524748	NM_001000712	10419.6	227.573	2.594124e+000	2.584500e+000	61.5	42	1.309314e+001	0	0	0	0	0	0	-0.048308	0	0	57.5363	43.7407
DATA	533	7	23	0	0	A_64_P126797	ENSRNOT00000048363	10444.9	227.733	5.947893e+001	6.484137e+000	118	41	7.816167e+000	0	0	0	0	0	0	57.0526	1	1	48.8603	41.3226
DATA	535	7	25	0	0	A_42_P730411	NM_001012181	10495.7	227.5	4.134721e+002	4.142756e+001	441	40	8.135703e+000	0	0	0	0	0	0	397.08	1	1	49.1849	40.7586
DATA	536	7	26	0	0	A_64_P049501	NM_001047970	10521.3	227.507	2.260856e+001	3.429103e+000	85	43	9.157192e+000	0	0	0	0	0	0	21.7178	1	1	46.8651	42.3333
DATA	537	7	27	0	0	A_42_P623688	NM_031031	10546.2	227.658	3.225972e+003	3.226075e+002	3067	38	8.203087e+000	0	0	0	0	0	0	3098.96	1	1	48.2044	37.1724
DATA	538	7	28	0	0	A_42_P601217	NM_053460	10571.6	227.942	9.715549e+001	1.005193e+001	156	38	6.855581e+000	0	0	0	0	0	0	93.3124	1	1	46.5243	37.9688
DATA	540	7	30	0	0	A_42_P791872	NM_001135174	10622.4	228	4.114485e+003	4.114566e+002	3967	38	4.109182e+000	0	0	0	0	0	0	3947.1	1	1	48.5334	37.6087
DATA	542	7	32	0	0	A_44_P557172	NM_177936	10673.3	227.926	6.052693e+001	6.582478e+000	121.5	41.5	9.936563e+000	0	0	0	0	0	0	57.9393	1	1	45.835	41.1471
DATA	543	7	33	0	0	A_64_P118812	NM_001000512	10699	228	6.284990e+000	2.666139e+000	69	40	6.885986e+000	0	0	0	0	0	0	6.00761	1	0	54.9904	38.3714
DATA	544	7	34	0	0	A_64_P019425	NM_172035	10724.3	227.75	1.100193e+002	1.130392e+001	170	45.5	1.101130e+001	0	0	0	0	0	0	104.985	1	1	47.5395	46.7143
DATA	545	7	35	0	0	A_42_P726743	NM_001108985	10749.6	227.825	5.546687e+002	5.552779e+001	586	40	9.231327e+000	0	0	0	0	0	0	528.29	1	1	49.5074	41
DATA	546	7	36	0	0	A_42_P558703	NM_001106810	10775.1	227.901	2.638716e+002	2.651552e+001	320	40	6.069194e+000	0	0	0	0	0	0	250.788	1	1	46.8651	39.7941
DATA	547	7	37	0	0	A_42_P619806	TC590118	10800.4	228.092	2.888593e+002	2.900378e+001	334	38	6.720418e+000	0	0	0	0	0	0	273.897	1	1	49.1849	38.1429
DATA	548	7	38	0	0	A_64_P072247	XM_001055615	10826.1	228.284	6.403896e+001	6.918640e+000	122	38	7.769473e+000	0	0	0	0	0	0	60.5647	1	1	45.835	39.6
DATA	549	7	39	0	0	A_64_P104164	A_64_P104164	10851.3	228	1.013848e+004	1.013851e+003	9916.5	39	1.157913e+001	0	0	0	0	0	0	9561.61	1	1	49.1849	43.1724
DATA	550	7	40	0	0	A_42_P672103	NM_021770	10876.4	228.122	8.842983e+003	8.843022e+002	8104	40	7.840345e+000	0	0	0	0	0	0	8315.15	1	1	48.5334	41.5833
DATA	551	7	41	0	0	A_64_P090942	NM_001000406	10901.6	228.082	6.801593e+000	2.728413e+000	69.5	38	9.718360e+000	0	0	0	0	0	0	6.37525	1	0	44.0646	38.0882
DATA	552	7	42	0	0	A_64_P149491	ENSRNOT00000025458	10926.9	227.582	2.324976e+001	3.526373e+000	83	41	8.391777e+000	0	0	0	0	0	0	21.7176	1	1	45.835	41.5405
DATA	553	7	43	0	0	A_42_P552441	NR_002704	10952.4	228.028	7.391188e+003	7.391236e+002	6692	40	1.036705e+001	0	0	0	0	0	0	6879.59	1	1	48.2044	42.3714
DATA	554	7	44	0	0	A_64_P060419	ENSRNOT00000055060	10978.4	228.427	2.680912e+000	2.670966e+000	58.5	38	6.541842e+000	0	0	0	0	0	0	-2.21188	0	0	57.5363	38.9355
DATA	555	7	45	0	0	A_44_P161233	NM_019165	11003.5	228.043	3.024900e+002	3.036762e+001	345	38.5	8.454359e+000	0	0	0	0	0	0	279.381	1	1	47.8731	38.9286
DATA	556	7	46	66	-1	(-)3xSLv1	NegativeControl	11029.4	228.427	2.702642e+000	2.692615e+000	59	39	7.364230e+000	0	0	0	0	0	0	-4.22527	0	0	57.5363	38.6667
DATA	557	7	47	0	0	A_43_P12519	NM_031114	11054.1	228.352	3.461022e+003	3.461128e+002	3226	41	8.428319e+000	0	0	0	0	0	0	3170.27	1	1	47.8731	41.6452
DATA	558	7	48	0	0	A_44_P317600	NM_012612	11079.8	228.114	3.069239e+002	3.081232e+001	347	39	6.014760e+000	0	0	0	0	0	0	279.888	1	1	46.8651	39.9655
DATA	559	7	49	0	0	A_64_P034166	A_64_P034166	11105.4	228.427	2.738327e+000	2.736020e+000	64	39	7.489730e+000	0	0	0	0	0	0	1.88039	0	0	57.5363	38.1034
DATA	560	7	50	0	0	A_64_P024585	NM_001109337	11130.6	228.344	9.774472e+000	2.909809e+000	70	41	6.055851e+000	0	0	0	0	0	0	8.83268	1	0	45.1352	41.56
DATA	561	7	51	0	0	A_42_P654682	NM_012724	11156.1	228.5	2.763988e+000	2.754557e+000	63	40	7.878190e+000	0	0	0	0	0	0	0.605603	0	0	65	40.8611
DATA	562	7	52	0	0	A_42_P524610	NM_001108992	11181.1	228.104	9.432322e+002	9.436380e+001	883	41	9.404872e+000	0	0	0	0	0	0	844.266	1	1	46.8651	41.75
DATA	563	7	53	0	0	A_64_P046677	NM_020093	11206.9	228.5	1.291004e+001	3.065681e+000	74	39	1.058361e+001	0	0	0	0	0	0	11.4989	1	0	56.9804	40.2903
DATA	564	7	54	0	0	A_64_P042742	XM_001061779	11232.3	228.222	2.637644e+002	2.652406e+001	303	43	8.919934e+000	0	0	0	0	0	0	233.764	1	1	47.5395	43.5
DATA	565	7	55	0	0	A_64_P058430	ENSRNOT00000062073	11257.5	228.389	1.514473e+001	3.190667e+000	74.5	41	7.616815e+000	0	0	0	0	0	0	13.356	1	1	48.5334	40.3889
DATA	566	7	56	0	0	A_42_P479251	NM_001108686	11283.1	228.518	3.793350e+003	3.793455e+002	3339	44	9.146993e+000	0	0	0	0	0	0	3328.53	1	1	51.7088	42.1034
DATA	567	7	57	0	0	A_42_P777329	NM_001106943	11308.2	228.136	3.079267e+002	3.092306e+001	334.5	37	8.211490e+000	0	0	0	0	0	0	268.838	1	1	46.1809	39.4286
DATA	568	7	58	0	0	A_64_P103414	NM_001106472	11333.7	228.5	2.861584e+000	2.860033e+000	61	41.5	8.969721e+000	0	0	0	0	0	0	1.97659	0	0	57.5363	42.2368
DATA	569	7	59	0	0	A_64_P082164	A_64_P082164	11359.3	228.5	8.207766e+001	8.693568e+000	134	38	1.009572e+001	0	0	0	0	0	0	70.9414	1	1	65	40.069
DATA	570	7	60	0	0	A_42_P702729	NM_001107557	11384.4	228.479	9.498735e+002	9.503099e+001	878	36	8.545234e+000	0	0	0	0	0	0	816.972	1	1	48.2044	37.9189
DATA	571	7	61	0	0	A_64_P130922	A_64_P130922	11410.1	228.397	3.480196e+002	3.492208e+001	360	38	9.859497e+000	0	0	0	0	0	0	297.841	1	1	48.5334	38.375
DATA	572	7	62	0	0	A_42_P509843	NM_001100480	11435.1	228.427	3.283953e+002	3.296800e+001	344	44	6.869890e+000	0	0	0	0	0	0	279.718	1	1	48.8603	43.3462
DATA	573	7	63	0	0	A_64_P110759	A_64_P110759	11460.6	228.573	4.884815e+001	5.691755e+000	102	39.5	6.419389e+000	0	0	0	0	0	0	41.4114	1	1	57.5363	38.9412
DATA	574	7	64	0	0	A_64_P006235	A_64_P006235	11486.3	228.582	8.650314e+002	8.655291e+001	789.5	41	7.681580e+000	0	0	0	0	0	0	729.93	1	1	50.7771	40.44
DATA	575	7	65	0	0	A_44_P506064	NM_001191778	11511.3	228.473	3.484454e+001	4.564256e+000	88	37	7.292654e+000	0	0	0	0	0	0	29.2728	1	1	49.1849	36.871
DATA	576	7	66	0	0	A_64_P075425	A_64_P075425	11537	228.5	4.497734e+003	4.497832e+002	3839	39	6.708627e+000	0	0	0	0	0	0	3762.15	1	1	54.7002	38.5455
DATA	577	7	67	0	0	A_42_P544898	NM_001108279	11562	228.45	3.420628e+001	4.531983e+000	89	40.5	6.899038e+000	0	0	0	0	0	0	28.4963	1	1	50.4627	40.6053
DATA	578	7	68	0	0	A_44_P837192	ENSRNOT00000038251	11587.6	228.961	5.503567e+001	6.260671e+000	105	40.5	9.160751e+000	0	0	0	0	0	0	45.6719	1	1	49.1849	39.875
DATA	580	7	70	0	0	A_44_P325657	NM_001014007	11638.6	228.878	1.130016e+002	1.169307e+001	152	39	7.971799e+000	0	0	0	0	0	0	93.1109	1	1	48.5334	39.7429
DATA	581	7	71	0	0	A_64_P004598	ENSRNOT00000024034	11663.9	228.757	2.017650e+002	2.040055e+001	223	41	9.453635e+000	0	0	0	0	0	0	165.729	1	1	46.5243	41.3939
DATA	582	7	72	0	0	A_42_P607183	XM_001081723	11689.5	228.648	6.939470e+002	6.946054e+001	636	42	8.797159e+000	0	0	0	1	0	0	568.377	1	1	57.5363	40.16
DATA	584	7	74	0	0	A_42_P589190	NM_023104	11740	229	5.004086e+002	5.013297e+001	458	39	7.991947e+000	0	0	0	0	0	0	408.013	1	1	46.8651	41.3939
DATA	585	7	75	0	0	A_42_P757323	TC587630	11765.2	228.866	1.484213e+003	1.484525e+002	1240.5	39	6.893990e+000	0	0	0	1	0	0	1208.06	1	1	46.1809	39.2069
DATA	586	7	76	0	0	A_42_P688320	NM_001108569	11791.2	228.859	1.258492e+002	1.294850e+001	158.5	38	7.116048e+000	0	0	0	0	0	0	102.296	1	1	46.8651	38.973
DATA	587	7	77	0	0	A_44_P224705	NM_031002	11816.1	228.891	8.576541e+001	9.102548e+000	128	40	8.129560e+000	0	0	0	0	0	0	69.6548	1	1	45.835	41.25
DATA	588	7	78	0	0	A_42_P481849	NM_001100563	11841.4	228.986	7.673093e+002	7.679155e+001	673	39	6.795490e+000	0	0	0	1	0	0	622.939	1	1	48.2044	39.6486
DATA	589	7	79	66	1	DarkCorner	DarkCorner	11867.5	229.447	3.061366e+000	3.050008e+000	57	39	8.650436e+000	0	0	0	0	0	0	-0.779544	0	0	48.2044	40.5172
DATA	590	7	80	66	1	DarkCorner	DarkCorner	11892.6	229.114	3.059570e+000	3.048219e+000	58	39	9.746017e+000	0	0	0	0	0	0	-1.95898	0	0	47.2035	40.1212
DATA	591	7	81	66	1	DarkCorner	DarkCorner	11917.9	229.065	3.055886e+000	3.044549e+000	56	39	1.005344e+001	0	0	0	0	0	0	-4.02552	0	0	54.4085	39.6563
DATA	592	7	82	66	1	DarkCorner	DarkCorner	11943.2	228.87	3.050485e+000	3.039168e+000	53.5	40	7.097550e+000	0	0	0	0	0	0	-4.42852	0	0	37.847	40.4412
DATA	593	7	83	66	1	DarkCorner	DarkCorner	11968.5	228.806	3.043106e+000	3.031816e+000	56	39	8.060651e+000	0	0	0	0	0	0	-2.84308	0	0	42.9674	39.1591
DATA	594	7	84	66	1	DarkCorner	DarkCorner	11993.8	229.299	3.033412e+000	3.022158e+000	58	39.5	6.648655e+000	0	0	0	0	0	0	-1.0484	0	0	48.5334	41.2692
DATA	595	7	85	66	1	DarkCorner	DarkCorner	12019.5	228.756	3.022075e+000	3.010863e+000	56	36	8.005202e+000	0	0	0	0	0	0	-4.05051	0	0	49.1849	36.7021
DATA	596	8	1	66	1	DarkCorner	DarkCorner	9899.42	234.573	2.751320e+000	2.741112e+000	59	39	9.497625e+000	0	0	0	0	0	0	-2.35686	0	0	57.5363	38.4419
DATA	597	8	2	66	1	DarkCorner	DarkCorner	9925.13	234.32	2.740252e+000	2.730086e+000	56.5	44	6.569110e+000	0	0	0	0	0	0	-4.53082	0	0	49.1849	42.975
DATA	598	8	3	66	1	DarkCorner	DarkCorner	9950.03	234.984	2.729268e+000	2.719142e+000	57.5	41	7.451142e+000	0	0	0	0	0	0	-4.53971	0	0	44.0646	40.3784
DATA	599	8	4	66	1	DarkCorner	DarkCorner	9975.46	235.075	2.718492e+000	2.708411e+000	61	41	8.095692e+000	0	0	0	0	0	0	0.0484252	0	0	45.835	41.6667
DATA	600	8	5	66	1	DarkCorner	DarkCorner	10000.6	234.573	2.708306e+000	2.698258e+000	59	39.5	8.308511e+000	0	0	0	0	0	0	-2.84694	0	0	57.5363	40.5714
DATA	601	8	6	66	1	DarkCorner	DarkCorner	10026.1	234.614	2.697985e+000	2.687975e+000	58	41	9.284280e+000	0	0	0	0	0	0	-5.36021	0	0	65	41.2581
DATA	602	8	7	66	1	DarkCorner	DarkCorner	10052.1	234.714	2.687752e+000	2.677781e+000	61	40	8.680023e+000	0	0	0	0	0	0	-1.89027	0	0	51.7088	41.0303
DATA	603	8	8	0	0	A_44_P487081	NM_001033951	10076.9	234.614	3.160199e+002	3.171444e+001	354	39.5	7.604899e+000	0	0	0	0	0	0	293.309	1	1	57.259	40.4
DATA	604	8	9	0	0	A_64_P054403	NM_001170340	10102.4	234.573	3.116310e+002	3.127635e+001	350	38.5	8.114199e+000	0	0	0	0	0	0	290.246	1	1	57.5363	39.7667
DATA	605	8	10	0	0	A_44_P665685	NM_001109325	10127.7	234.771	1.305556e+001	2.954341e+000	73	36	8.614901e+000	0	0	0	0	0	0	12.2005	1	0	47.2035	37.2963
DATA	606	8	11	0	0	A_42_P531684	NM_001014215	10153	234.722	8.871483e+001	9.256464e+000	143	39.5	7.656912e+000	0	0	0	0	0	0	83.1701	1	1	47.2035	39.0357
DATA	607	8	12	0	0	A_42_P722904	ENSRNOT00000006525	10178.3	234.971	8.982032e+002	8.985893e+001	888.5	40	7.423878e+000	0	0	0	0	0	0	844.654	1	1	46.1809	41.963
DATA	608	8	13	0	0	A_42_P514057	NM_031839	10203.8	235.068	1.004787e+001	2.811657e+000	71	40	6.006151e+000	0	0	0	0	0	0	9.47646	1	0	46.8651	40.0769
DATA	609	8	14	0	0	A_64_P087459	A_64_P087459	10229.5	235	4.791333e+004	4.791333e+003	45005	41	6.878252e+000	0	0	0	0	0	0	45312.4	1	1	54.1152	40.8966
DATA	610	8	15	0	0	A_42_P581060	NM_001108722	10254.5	235.055	5.222780e+003	5.222845e+002	4822	39	8.469123e+000	0	0	0	0	0	0	4951.62	1	1	48.5334	39.5429
DATA	611	8	16	0	0	A_42_P658220	NM_001109598	10279.9	235.1	9.460152e+002	9.463741e+001	947	37	6.881954e+000	0	0	0	0	0	0	899.015	1	1	46.8651	37.1935
DATA	612	8	17	0	0	A_42_P758454	NM_001108101	10305.2	235.076	2.764936e+002	2.777139e+001	328.5	36.5	7.869654e+000	0	0	0	0	0	0	263.319	1	1	46.1809	35.9375
DATA	613	8	18	0	0	A_64_P140956	NM_001013141	10330.5	235	1.264443e+002	1.290808e+001	180	38	4.365600e+000	0	0	0	0	0	0	120.653	1	1	54.1152	37.5385
DATA	614	8	19	0	0	A_42_P508984	NM_001007729	10356.2	235.076	4.152440e+002	4.160515e+001	459.5	36	5.382094e+000	0	0	0	1	0	0	396.924	1	1	46.1809	36.3214
DATA	615	8	20	0	0	A_42_P619008	NM_001013079	10381.2	235	2.445935e+003	2.446072e+002	2293	41	8.251509e+000	0	0	0	0	0	0	2341.52	1	1	46.8651	42.1714
DATA	616	8	21	0	0	A_64_P058351	NM_017101	10407	235	9.794188e+004	9.794189e+003	95199	41	1.256106e+001	0	0	0	0	0	0	93884.2	1	1	54.9904	42.303
DATA	617	8	22	0	0	A_64_P083800	XM_001058776	10432.3	235.278	1.812188e+001	3.153542e+000	78.5	42	1.272541e+001	0	0	0	0	0	0	17.3902	1	1	48.2044	44.6897
DATA	618	8	23	0	0	A_64_P028088	NM_001106073	10457.8	235.32	2.836004e+002	2.847704e+001	335.5	40.5	8.163628e+000	0	0	0	0	0	0	272.381	1	1	49.1849	41.1
DATA	619	8	24	0	0	A_44_P105441	ENSRNOT00000042202	10483	235.191	8.583364e+003	8.583403e+002	8340	38	7.359915e+000	0	0	0	0	0	0	8248.64	1	1	46.8651	38.3438
DATA	620	8	25	0	0	A_42_P675802	NM_145777	10508.5	235.352	7.310185e+002	7.314722e+001	763	42	7.893846e+000	0	0	0	0	0	0	702.786	1	1	57.5363	41.7931
DATA	621	8	26	0	0	A_64_P018525	ENSRNOT00000027134	10534	235.455	3.979688e+002	3.988014e+001	446	41	9.150419e+000	0	0	0	0	0	0	382.653	1	1	55.8519	40.3889
DATA	622	8	27	0	0	A_42_P749382	NM_001106731	10559.1	234.956	4.137635e+003	4.137715e+002	3943.5	40	7.928867e+000	0	0	0	0	0	0	3977.75	1	1	46.8651	40.6875
DATA	623	8	28	0	0	A_44_P316364	NM_001077675	10584.6	235.427	1.624243e+001	3.046130e+000	81	38	7.787036e+000	0	0	0	0	0	0	15.6102	1	1	57.5363	38.931
DATA	624	8	29	0	0	A_64_P143596	ENSRNOT00000060139	10610.4	235.427	6.414062e+001	6.912956e+000	126.5	39	8.315660e+000	0	0	0	0	0	0	61.6066	1	1	57.5363	39.1739
DATA	625	8	30	0	0	A_42_P468723	NM_001191689	10635.5	235.5	2.755979e+002	2.768035e+001	327	37	6.581724e+000	0	0	0	0	0	0	264.494	1	1	46.5243	37.3704
DATA	626	8	31	0	0	A_42_P533792	NM_001106575	10660.6	235.37	4.189616e+003	4.189696e+002	3949.5	38	8.371309e+000	0	0	0	0	0	0	4016.48	1	1	48.2044	37.6897
DATA	627	8	32	0	0	A_43_P16773	XM_217313	10686.1	235.338	3.122103e+002	3.132801e+001	359	40	9.876149e+000	0	0	0	0	0	0	298.914	1	1	45.835	41.2143
DATA	628	8	33	0	0	A_42_P765830	NM_001106426	10711.5	235.119	7.312781e+003	7.312827e+002	6950.5	38.5	6.931852e+000	0	0	0	0	0	0	6990.32	1	1	46.1809	38.8667
DATA	629	8	34	0	0	A_43_P15073	ENSRNOT00000030771	10737.4	235.791	5.145753e+001	5.763243e+000	112	47	8.413630e+000	0	0	0	0	0	0	49.1028	1	1	46.5243	47.5926
DATA	630	8	35	0	0	A_42_P538527	NM_001108885	10762.1	235.232	3.797056e+002	3.805951e+001	429.5	39	6.138187e+000	0	0	0	0	0	0	361.599	1	1	46.5243	39.0345
DATA	631	8	36	0	0	A_64_P037130	A_64_P037130	10787.9	235.5	2.616228e+000	2.606521e+000	56	43	4.911551e+000	0	0	0	0	0	0	-6.55206	0	0	56.9804	41.96
DATA	632	8	37	0	0	A_44_P536115	NM_023957	10813.4	235.427	1.769167e+003	1.769360e+002	1675	39	9.844049e+000	0	0	0	0	0	0	1676.84	1	1	57.5363	38.303
DATA	633	8	38	0	0	A_43_P11800	NM_017059	10838.6	235.466	2.113348e+002	2.129526e+001	260	44	8.181440e+000	0	0	0	0	0	0	199.776	1	1	49.1849	44.3103
DATA	634	8	39	0	0	A_64_P004922	NM_001191924	10863.8	235.351	1.676901e+003	1.677107e+002	1603	42	8.671182e+000	0	0	0	0	0	0	1580.6	1	1	49.8279	42.2424
DATA	635	8	40	0	0	A_64_P145058	NM_001107951	10889.3	235.611	4.112111e+002	4.120549e+001	433	39	8.695166e+000	0	0	0	0	0	0	386.406	1	1	48.2044	38.9655
DATA	636	8	41	0	0	A_64_P075372	A_64_P075372	10914.9	235.97	2.042319e+001	3.341163e+000	80	38	6.061467e+000	0	0	0	0	0	0	19.1284	1	1	46.8651	38.5
DATA	637	8	42	0	0	A_64_P118792	NM_001107034	10940.4	235.573	1.924275e+001	3.277960e+000	82	43	1.087396e+001	0	0	0	0	0	0	17.9588	1	1	57.5363	43.6154
DATA	638	8	43	0	0	A_42_P469685	NM_001100532	10965.4	235.671	1.943128e+003	1.943310e+002	1913	36.5	7.690654e+000	0	0	0	0	0	0	1806.97	1	1	48.5334	39.1154
DATA	639	8	44	0	0	A_42_P759822	NM_001109673	10991	235.545	1.824294e+002	1.843782e+001	236.5	37	6.241425e+000	0	0	0	0	0	0	168.987	1	1	55.8519	37.3462
DATA	640	8	45	0	0	A_64_P014687	NM_012650	11016.3	235.612	6.733822e+003	6.733875e+002	6486	41	7.388715e+000	0	0	0	0	0	0	6212.78	1	1	45.835	41.4
DATA	641	8	46	0	0	A_43_P18505	NM_001012010	11041.6	235.389	5.597080e+001	6.212354e+000	110.5	41.5	8.340142e+000	0	0	0	0	0	0	51.4254	1	1	48.2044	41.9167
DATA	642	8	47	0	0	A_43_P12580	NM_031548	11067.4	235.573	1.402671e+002	1.428560e+001	189	40.5	9.282857e+000	0	0	0	0	0	0	128.315	1	1	57.5363	41
DATA	643	8	48	0	0	A_64_P052980	NM_001014786	11092.6	235.573	2.630641e+001	3.783476e+000	86	41	8.036293e+000	0	0	0	0	0	0	23.9593	1	1	57.5363	39.7143
DATA	644	8	49	0	0	A_64_P397764	ENSRNOT00000028709	11117.9	235.451	3.497778e+002	3.508429e+001	381	39	5.638195e+000	0	0	0	0	0	0	317.118	1	1	48.2044	39.5484
DATA	645	8	50	0	0	A_64_P048408	NM_001008858	11142.9	235.828	7.630950e+001	8.109358e+000	127	40	7.320933e+000	0	0	0	0	0	0	68.8712	1	1	45.835	41.1034
DATA	647	8	52	0	0	A_64_P059500	ENSRNOT00000043917	11194.4	235.573	2.781416e+000	2.784624e+000	63	40.5	9.152744e+000	0	0	0	0	0	0	2.45012	0	0	57.5363	40.5
DATA	648	8	53	0	0	A_64_P220198	AW917371	11219.5	235.648	9.566523e+000	2.944288e+000	69	39	8.782938e+000	0	0	0	0	0	0	8.50875	1	0	57.5363	41.16
DATA	649	8	54	0	0	A_64_P109764	NM_001007756	11244.9	235.624	2.737942e+002	2.752206e+001	303	40.5	7.395509e+000	0	0	0	0	0	0	242.316	1	1	52.0157	40.125
DATA	650	8	55	0	0	A_64_P142685	NM_001130498	11270.5	235.648	1.852611e+001	3.367857e+000	77	42	6.960489e+000	0	0	0	0	0	0	16.3137	1	1	57.5363	41.1786
DATA	651	8	56	0	0	A_44_P395709	NM_134366	11295.4	235.853	1.169872e+003	1.170213e+002	1051	35	9.026929e+000	0	0	0	0	0	0	1025.13	1	1	47.2035	38.3214
DATA	652	8	57	0	0	A_64_P165071	NM_001110165	11320.9	235.687	4.550526e+003	4.550615e+002	3978	43	8.523920e+000	0	0	0	0	0	0	3967.37	1	1	45.835	42.0256
DATA	653	8	58	0	0	A_64_P009147	ENSRNOT00000042587	11346.5	235.956	4.220912e+001	5.095738e+000	97	41	9.590773e+000	0	0	0	0	0	0	36.6168	1	1	46.5243	41.2632
DATA	654	8	59	0	0	A_42_P647072	NM_178102	11371.7	236	9.581773e+002	9.586067e+001	909	34	5.130452e+000	0	0	0	0	0	0	827.133	1	1	50.4627	34.1923
DATA	655	8	60	0	0	A_64_P125585	XM_001063000	11397.5	236	2.303695e+001	3.690682e+000	81.5	38	7.847361e+000	0	0	0	0	0	0	19.7871	1	1	54.1152	38.4054
DATA	656	8	61	0	0	A_42_P610317	NM_001108225	11422.4	236	3.327116e+003	3.327242e+002	2807	41.5	8.520538e+000	0	0	0	0	0	0	2844.2	1	1	48.5334	41.1364
DATA	657	8	62	0	0	A_42_P755831	NM_152935	11447.8	235.903	9.954431e+003	9.954473e+002	8174.5	42	6.693280e+000	0	0	0	0	0	0	8468.86	1	1	46.8651	41
DATA	659	8	64	0	0	A_44_P386375	NM_053842	11498.6	236.119	3.683925e+002	3.695621e+001	377	37.5	8.550008e+000	0	0	0	0	0	0	310.561	1	1	45.835	39.55
DATA	660	8	65	0	0	A_43_P15565	NM_023953	11524.5	236	1.864056e+001	3.490433e+000	79	40	7.641068e+000	0	0	0	0	0	0	15.6442	1	1	54.1152	39.0882
DATA	661	8	66	0	0	A_42_P456701	NM_001009697	11549.4	235.87	4.465544e+002	4.475365e+001	435	40	7.351675e+000	0	0	0	0	0	0	373.229	1	1	46.8651	39.7667
DATA	662	8	67	0	0	A_43_P20388	ENSRNOT00000061333	11574.9	235.765	4.807899e+002	4.817096e+001	467	41	8.850078e+000	0	0	0	0	0	0	400.221	1	1	46.1809	41.3077
DATA	663	8	68	0	0	A_44_P572504	TC585660	11600.1	235.672	3.417158e+002	3.430183e+001	338.5	40.5	9.570568e+000	0	0	0	0	0	0	283.385	1	1	45.1352	40.7813
DATA	664	8	69	0	0	A_64_P059964	NM_001013858	11625.5	236.122	1.820178e+003	1.820425e+002	1565	41	7.550023e+000	0	0	0	0	0	0	1504.25	1	1	48.8603	40.1852
DATA	665	8	70	0	0	A_44_P1056293	ENSRNOT00000022862	11651.1	236.232	1.400145e+003	1.400468e+002	1193	41	7.520724e+000	0	0	0	0	0	0	1153.36	1	1	46.5243	41.1935
DATA	666	8	71	0	0	A_64_P133276	NM_001107464	11676.5	236.184	3.012258e+002	3.027314e+001	312	37	8.093825e+000	0	0	0	0	0	0	247.394	1	1	49.8279	39.48
DATA	667	8	72	0	0	A_42_P667782	NM_001009673	11701.7	236.155	5.062366e+002	5.071387e+001	476	41	5.781940e+000	0	0	0	0	0	0	414.674	1	1	47.5395	40.6087
DATA	668	8	73	0	0	A_64_P023624	A_64_P023624	11727.3	235.986	1.915658e+002	1.939482e+001	218	36	7.981460e+000	0	0	0	0	0	0	156.55	1	1	47.2035	38.3704
DATA	669	8	74	0	0	A_64_P110130	NM_001106172	11752.7	236.273	7.934360e+002	7.940167e+001	715	41.5	9.874974e+000	0	0	0	0	0	0	647.195	1	1	49.8279	41.9688
DATA	670	8	75	0	0	A_64_P087728	XM_001078778	11777.9	236.076	1.102524e+002	1.143693e+001	152	38	8.175627e+000	0	0	0	0	0	0	89.7925	1	1	46.1809	38.5238
DATA	671	8	76	0	0	A_44_P475356	NM_001177823	11803.6	236.427	1.360536e+002	1.394176e+001	175.5	42.5	7.908873e+000	0	0	0	0	0	0	110.691	1	1	57.5363	42.4286
DATA	672	8	77	0	0	A_42_P560984	NM_001109179	11828.6	236.366	5.290540e+003	5.290627e+002	4300	39	6.121095e+000	0	0	0	0	0	0	4301.58	1	1	47.8731	38.9697
DATA	673	8	78	0	0	A_42_P566906	NM_001006966	11854.1	236.284	1.423247e+003	1.423573e+002	1216.5	41.5	8.249277e+000	0	0	0	0	0	0	1157.02	1	1	48.5334	42.1333
DATA	674	8	79	66	1	DarkCorner	DarkCorner	11879.6	236.427	3.056628e+000	3.045530e+000	59	38.5	5.589684e+000	0	0	0	0	0	0	0.312058	0	0	65	37.875
DATA	675	8	80	66	1	DarkCorner	DarkCorner	11905.3	236.5	3.053688e+000	3.042358e+000	55	40	1.173137e+001	0	0	0	0	0	0	-4.36604	0	0	57.5363	42
DATA	676	8	81	66	1	DarkCorner	DarkCorner	11930.5	236.5	3.049092e+000	3.037780e+000	55.5	40.5	6.905267e+000	0	0	0	0	0	0	-3.66101	0	0	57.5363	41.1176
DATA	677	8	82	66	1	DarkCorner	DarkCorner	11955.7	236.494	3.042664e+000	3.031376e+000	58	40	7.064289e+000	0	0	0	0	0	0	-1.9617	0	0	49.8279	40.2051
DATA	678	8	83	66	1	DarkCorner	DarkCorner	11982.7	236.114	3.033860e+000	3.022604e+000	57	39	7.079311e+000	0	0	0	0	0	0	-3.15612	0	0	36.9964	38.2105
DATA	679	8	84	66	1	DarkCorner	DarkCorner	12006.5	236.707	3.023643e+000	3.012425e+000	56	40	7.930502e+000	0	0	0	0	0	0	-3.52929	0	0	49.1849	41.1786
DATA	680	8	85	66	1	DarkCorner	DarkCorner	12032.3	236.5	3.010952e+000	2.999781e+000	59	33	7.462147e+000	0	0	0	0	0	0	-0.337969	0	0	57.5363	33.3743
DATA	681	9	1	66	1	DarkCorner	DarkCorner	9886.5	242	2.753496e+000	2.743280e+000	61	36	8.112794e+000	0	0	0	0	0	0	-1.11943	0	0	54.1152	36.1573
DATA	682	9	2	66	1	DarkCorner	DarkCorner	9912.14	242.036	2.742382e+000	2.732207e+000	58	42	7.287531e+000	0	0	0	0	0	0	-3.99797	0	0	50.4627	40.9459
DATA	683	9	3	66	1	DarkCorner	DarkCorner	9937.26	242	2.731640e+000	2.721506e+000	57	42.5	7.326419e+000	0	0	0	0	0	0	-4.26821	0	0	36.1258	42.5313
DATA	684	9	4	66	1	DarkCorner	DarkCorner	9962.62	241.6	2.721097e+000	2.711001e+000	58	41	7.264361e+000	0	0	0	0	0	0	-3.95516	0	0	41.4593	41.6765
DATA	685	9	5	66	1	DarkCorner	DarkCorner	9988	242	2.710395e+000	2.700340e+000	56.5	40.5	8.453923e+000	0	0	0	0	0	0	-5.79249	0	0	65	40.4706
DATA	686	9	6	66	1	DarkCorner	DarkCorner	10014.5	242.169	2.699576e+000	2.689560e+000	60.5	41	8.932743e+000	0	0	0	0	0	0	-0.699046	0	0	45.1352	41.3902
DATA	687	9	7	66	1	DarkCorner	DarkCorner	10038.5	242.045	2.690140e+000	2.680159e+000	62	40.5	8.042722e+000	0	0	0	0	0	0	-1.56912	0	0	44.7812	41.2647
DATA	688	9	8	0	0	A_44_P195306	NM_019377	10064.4	242.069	1.515726e+004	1.515728e+003	13747.5	39	8.740312e+000	0	0	0	0	0	0	14058.3	1	1	53.8203	39.9706
DATA	689	9	9	0	0	A_44_P653240	NM_001202552	10089.3	241.775	3.377711e+002	3.388178e+001	373	40.5	8.338320e+000	0	0	0	0	0	0	314.349	1	1	47.2035	40.7
DATA	690	9	10	0	0	A_64_P012778	ENSRNOT00000038310	10114.9	242.386	6.001349e+000	2.718919e+000	68.5	38.5	1.056371e+001	0	0	0	0	0	0	5.60484	1	0	57.259	40.1667
DATA	691	9	11	0	0	A_43_P11430	NM_001130503	10140.1	241.825	3.095778e+002	3.107044e+001	350.5	37	9.201332e+000	0	0	0	0	0	0	290.037	1	1	45.4864	37.7419
DATA	692	9	12	0	0	A_44_P225353	NM_001009678	10165.4	241.761	2.657329e+002	2.670365e+001	304.5	40.5	6.940793e+000	0	0	0	0	0	0	249.733	1	1	46.5243	41.7857
DATA	693	9	13	0	0	A_64_P055231	NM_001106620	10191.3	242.122	5.715703e+002	5.721738e+001	585.5	40	8.183960e+000	0	0	0	0	0	0	538.804	1	1	48.8603	41.1481
DATA	694	9	14	0	0	A_42_P540950	NM_001009541	10216.4	242.291	5.569978e+002	5.576137e+001	578	40	6.833194e+000	0	0	0	0	0	0	526.525	1	1	50.4627	40.2188
DATA	695	9	15	0	0	A_64_P135888	ENSRNOT00000029916	10242	242.455	2.622764e+000	2.616439e+000	65	42	6.428582e+000	0	0	0	0	0	0	1.26496	0	0	65	41.08
DATA	696	9	16	0	0	A_64_P086448	NM_001008819	10267.6	242.414	8.285380e+001	8.685749e+000	136.5	38	9.078009e+000	0	0	0	0	0	0	78.7211	1	1	47.8731	38.1026
DATA	697	9	17	0	0	A_42_P701779	NM_001108048	10292.4	241.761	9.976757e+002	9.980148e+001	967	38	6.790859e+000	0	0	0	0	0	0	949.917	1	1	46.5243	38.4828
DATA	698	9	18	0	0	A_44_P409965	ENSRNOT00000036078	10318.3	242.5	2.811465e+001	3.826372e+000	92	36	4.079216e+000	0	0	0	0	0	0	26.8269	1	1	57.5363	36.16
DATA	699	9	19	0	0	A_44_P474037	NM_052807	10343.5	242.068	1.187759e+002	1.215690e+001	175	38.5	6.540760e+000	0	0	0	0	0	0	113.536	1	1	48.5334	39.3077
DATA	700	9	20	0	0	A_64_P156985	NM_001000385	10368.9	242.5	2.596267e+000	2.586635e+000	61	41	7.773582e+000	0	0	0	0	0	0	-3.10168	0	0	65	41
DATA	701	9	21	0	0	A_42_P635228	NM_001107651	10394.4	242.427	4.553579e+001	5.235175e+000	107	46	9.227245e+000	0	0	0	0	0	0	43.6606	1	1	57.5363	42.7273
DATA	702	9	22	0	0	A_64_P240508	ENSRNOT00000018000	10419.6	242.427	2.120685e+002	2.136321e+001	269	42	1.124011e+001	0	0	0	0	0	0	203.573	1	1	57.5363	43.44
DATA	703	9	23	0	0	A_64_P026509	NM_020656	10445.1	242.5	9.894758e+001	1.022496e+001	155.5	39.5	9.640432e+000	0	0	0	0	0	0	95.0754	1	1	56.9804	40.6
DATA	704	9	24	0	0	A_42_P570241	NM_177928	10470.2	242.324	1.987485e+002	2.004106e+001	254	40.5	6.988398e+000	0	0	0	0	0	0	191.103	1	1	47.5395	40.5313
DATA	706	9	26	0	0	A_64_P032893	TC597420	10520.8	242.176	1.627603e+004	1.627605e+003	15463	38	8.767947e+000	0	0	0	0	0	0	15661.2	1	1	48.2044	40.2424
DATA	707	9	27	0	0	A_64_P043605	NM_001024799	10546.5	242.5	1.979297e+003	1.979465e+002	1926.5	40	8.172206e+000	0	0	0	0	0	0	1904.62	1	1	57.5363	40.4194
DATA	708	9	28	0	0	A_64_P095890	NM_019337	10572	242.314	4.345590e+003	4.345666e+002	4208	37	8.547250e+000	0	0	0	0	0	0	4180.59	1	1	52.3208	37.8421
DATA	709	9	29	0	0	A_42_P513145	NM_001107288	10597.3	242.273	2.431003e+002	2.444609e+001	289	42	8.785741e+000	0	0	0	0	0	0	233.759	1	1	49.8279	41.5484
DATA	710	9	30	0	0	A_64_P122317	NM_001108031	10622.5	242.205	7.601150e+001	8.026252e+000	138	39	8.912518e+000	0	0	0	0	0	0	73.0388	1	1	48.2044	40.9583
DATA	711	9	31	0	0	A_64_P065492	NM_001109101	10648.4	242.573	1.487002e+001	2.977714e+000	76	40	8.605264e+000	0	0	0	0	0	0	14.2752	1	1	57.5363	40.1333
DATA	712	9	32	0	0	A_64_P129273	NM_001105871	10673.1	242.474	2.764508e+001	3.783340e+000	89	39	1.090347e+001	0	0	0	0	0	0	26.5083	1	1	49.1849	41.1667
DATA	713	9	33	0	0	A_64_P050748	NM_181824	10699	242.545	2.371755e+001	3.509375e+000	87.5	39	8.312894e+000	0	0	0	0	0	0	22.7094	1	1	65	39.6857
DATA	714	9	34	0	0	A_42_P689755	NM_053306	10724.2	242.26	3.883603e+001	4.668557e+000	98	42	6.492170e+000	0	0	0	0	0	0	37.1227	1	1	48.5334	42.7
DATA	715	9	35	0	0	A_64_P039586	TC635481	10749.6	242.573	1.141340e+002	1.170486e+001	169	40	7.691987e+000	0	0	0	0	0	0	108.896	1	1	57.5363	42.2
DATA	716	9	36	0	0	A_64_P083474	NM_001134731	10774.9	242.534	2.101691e+003	2.101852e+002	2024	39	5.747282e+000	0	0	0	0	0	0	2000.99	1	1	48.5334	39.5313
DATA	718	9	38	0	0	A_42_P763553	NM_001107486	10826	242.545	8.882669e+001	9.259356e+000	150	41	9.206063e+000	0	0	0	0	0	0	84.154	1	1	55.8519	42.1389
DATA	719	9	39	0	0	A_44_P151513	NM_001000901	10851.4	242.573	2.631210e+000	2.628783e+000	63.5	39	9.041276e+000	0	0	0	0	0	0	1.85402	0	0	57.5363	41.6579
DATA	720	9	40	0	0	A_42_P460204	ENSRNOT00000020886	10876.3	242.605	1.926999e+002	1.944852e+001	246	41	9.247453e+000	0	0	0	0	0	0	181.525	1	1	49.8279	40.3462
DATA	721	9	41	0	0	A_44_P218147	NM_001013432	10902.1	242.493	1.406125e+001	2.989068e+000	76	40	6.071982e+000	0	0	0	0	0	0	13.2028	1	1	48.5334	39.4
DATA	722	9	42	0	0	A_42_P554722	NM_001099758	10927.1	242.493	3.178436e+003	3.178546e+002	2940.5	42	9.590573e+000	0	0	0	0	0	0	2974.45	1	1	47.8731	42.8571
DATA	723	9	43	0	0	A_44_P135450	XM_223143	10952.9	242.935	1.594833e+002	1.616797e+001	215	42.5	1.132204e+001	0	0	0	0	0	0	148.716	1	1	65	43.8667
DATA	724	9	44	0	0	A_64_P107329	NM_001013207	10978.1	242.896	3.252978e+003	3.253088e+002	3104	38.5	7.440430e+000	0	0	0	0	0	0	3022.1	1	1	46.8651	40
DATA	725	9	45	0	0	A_64_P116219	NM_001004085	11003.6	242.87	8.190336e+003	8.190380e+002	7338	42	5.077111e+000	0	0	0	0	0	0	7579.08	1	1	46.8651	41.4091
DATA	726	9	46	0	0	A_44_P147396	NM_001191744	11029.4	242.931	2.513296e+001	3.679552e+000	83	42	6.931935e+000	0	0	0	0	0	0	23.1615	1	1	53.8203	42.8621
DATA	727	9	47	0	0	A_44_P975743	TC626448	11054.2	243	8.918342e+002	8.922424e+001	875	41	8.924907e+000	0	0	0	0	0	0	818.494	1	1	46.8651	41.0556
DATA	728	9	48	0	0	A_42_P728472	NM_001007600	11079.9	242.9	6.396197e+003	6.396255e+002	5929	43	6.649086e+000	0	0	0	0	0	0	5844.34	1	1	46.8651	42.8235
DATA	729	9	49	0	0	A_64_P130139	NM_013181	11105.2	242.75	6.070337e+003	6.070398e+002	5533.5	41	6.425779e+000	0	0	0	0	0	0	5521.69	1	1	45.1352	41.1724
DATA	730	9	50	0	0	A_42_P481087	XM_232226	11130.6	242.928	4.273046e+002	4.281791e+001	446.5	38	9.362171e+000	0	0	0	0	0	0	386.908	1	1	46.5243	40.3103
DATA	731	9	51	0	0	A_44_P102465	NM_001000424	11155.8	242.959	4.373978e+001	5.165580e+000	104	38.5	5.986758e+000	0	0	0	0	0	0	39.4207	1	1	47.2035	38.2857
DATA	732	9	52	0	0	A_64_P082557	ENSRNOT00000029274	11181.5	243	1.722332e+001	3.254447e+000	78	41	8.464108e+000	0	0	0	0	0	0	15.4476	1	1	54.1152	40.3125
DATA	733	9	53	0	0	A_64_P064873	XM_228599	11206.6	243.069	3.455339e+001	4.431469e+000	91	40	1.054459e+001	0	0	0	0	0	0	30.8426	1	1	53.8203	42.1667
DATA	734	9	54	0	0	A_64_P042298	A_64_P042298	11232.4	243.233	5.083175e+001	5.797774e+000	105	39	3.785243e+000	0	0	0	0	0	0	45.1477	1	1	42.9674	39.6522
DATA	735	9	55	0	0	A_44_P286341	ENSRNOT00000038519	11257.9	243.426	1.417793e+001	3.140552e+000	73.5	42	5.310516e+000	0	0	0	0	0	0	12.5303	1	1	43.3362	41.7391
DATA	736	9	56	0	0	A_44_P994614	NM_001106646	11282.6	243.36	1.977734e+004	1.977736e+003	16974.5	43	9.731337e+000	0	0	0	0	0	0	17393.9	1	1	48.8603	42.0323
DATA	737	9	57	0	0	A_64_P098354	XM_001066867	11308.5	242.794	1.023550e+002	1.061971e+001	151	35.5	8.686823e+000	0	0	0	0	0	0	89.5539	1	1	46.5243	38.225
DATA	738	9	58	0	0	A_64_P117373	NM_001107752	11333.6	243.427	7.158179e+001	7.702613e+000	125	42	9.225957e+000	0	0	0	0	0	0	62.3266	1	1	57.5363	41.4194
DATA	739	9	59	0	0	A_64_P111395	ENSRNOT00000025391	11359	242.774	2.565296e+002	2.581177e+001	285.5	37.5	8.856519e+000	0	0	0	0	0	0	222.229	1	1	45.4864	39.1
DATA	740	9	60	0	0	A_64_P059465	XM_229201	11384.4	243.461	8.368892e+000	2.992173e+000	68	34	4.325950e+000	0	0	0	0	0	0	7.21497	1	0	52.9257	35.0769
DATA	741	9	61	0	0	A_64_P010852	NM_001106214	11409.9	242.825	9.805907e+003	9.805950e+002	8177.5	39.5	7.666991e+000	0	0	0	0	0	0	8411.58	1	1	45.4864	40.1
DATA	742	9	62	0	0	A_64_P024967	NM_001008359	11435.4	242.875	7.156840e+001	7.722471e+000	122	41	7.334110e+000	0	0	0	0	0	0	61.0981	1	1	45.1352	41.5926
DATA	743	9	63	0	0	A_44_P278418	NM_012538	11460.6	243.427	7.393672e+000	3.006708e+000	69	39.5	6.145933e+000	0	0	0	0	0	0	6.28316	1	0	65	39.0714
DATA	744	9	64	0	0	A_44_P821875	NM_001009500	11486.2	243.532	3.253401e+001	4.376855e+000	86	42.5	7.433034e+000	0	0	0	0	0	0	27.5204	1	1	43.3362	41.75
DATA	745	9	65	0	0	A_64_P066737	A_64_P066737	11511.6	243.427	3.505757e+001	4.575932e+000	90.5	39.5	6.184969e+000	0	0	0	0	0	0	29.5235	1	1	57.5363	39.4231
DATA	746	9	66	0	0	A_64_P003943	TC616650	11537	243.455	5.829470e+001	6.534964e+000	109	40	8.036965e+000	0	0	0	0	0	0	48.8832	1	1	65	40.697
DATA	747	9	67	0	0	A_64_P047035	ENSRNOT00000066263	11562.2	243.849	1.390666e+001	3.275185e+000	73.5	41	9.020302e+000	0	0	0	0	0	0	11.6151	1	0	47.8731	42
DATA	748	9	68	0	0	A_64_P113867	NM_001077201	11587.8	243.116	4.156326e+002	4.166976e+001	410	45	9.695979e+000	0	0	0	0	0	0	345.747	1	1	46.5243	43.3514
DATA	749	9	69	0	0	A_64_P013758	NM_012582	11613.3	243.5	6.770059e+001	7.400124e+000	117	39.5	9.476573e+000	0	0	0	0	0	0	56.1147	1	1	65	40.4688
DATA	750	9	70	0	0	A_44_P303982	NM_001106381	11638.5	243.5	8.182841e+001	8.714766e+000	131	43	9.605100e+000	0	0	0	0	0	0	67.5976	1	1	57.5363	43.4643
DATA	751	9	71	0	0	A_64_P048601	A_64_P048601	11663.6	243.308	3.654227e+002	3.666581e+001	364	39.5	6.817737e+000	0	0	0	0	0	0	300.937	1	1	45.4864	38.1923
DATA	752	9	72	0	0	A_44_P304880	NM_001014261	11689.3	243.718	6.205988e+001	6.899897e+000	111.5	39	7.528169e+000	0	0	0	0	0	0	50.9673	1	1	47.5395	39.56
DATA	753	9	73	0	0	A_64_P096767	ENSRNOT00000039549	11714.3	243.183	5.001907e+000	3.064394e+000	63	36.5	6.906021e+000	0	0	0	0	0	0	4.09751	1	0	47.5395	38.2857
DATA	754	9	74	0	0	A_43_P21810	NM_001025000	11740.3	243.5	1.859522e+001	3.554791e+000	74	36.5	9.383786e+000	0	0	0	0	0	0	15.2011	1	1	57.5363	38.4063
DATA	756	9	76	0	0	A_64_P084976	NM_001008916	11790.9	243.5	3.050031e+000	3.038716e+000	58	37	7.991737e+000	0	0	0	0	0	0	-0.300093	0	0	56.9804	38.5135
DATA	757	9	77	0	0	A_64_P040004	XM_001054754	11816	243.5	1.422856e+003	1.423181e+002	1194	40.5	7.799687e+000	0	0	0	0	0	0	1158.7	1	1	47.2035	41.7941
DATA	758	9	78	0	0	A_64_P156785	XM_001058828	11841.6	243.573	5.698938e+000	3.095318e+000	64.5	39	7.432945e+000	0	0	0	0	0	0	4.63919	1	0	57.5363	39.2857
DATA	759	9	79	0	0	A_64_P123914	XM_217505	11866.7	243.7	1.158739e+004	1.158743e+003	9420.5	39	5.150370e+000	0	0	0	0	0	0	9434.03	1	1	47.2035	39
DATA	760	9	80	66	1	DarkCorner	DarkCorner	11892.4	243.573	3.051322e+000	3.040001e+000	59	38	7.311385e+000	0	0	0	0	0	0	-1.57542	0	0	57.5363	36.5278
DATA	761	9	81	66	1	DarkCorner	DarkCorner	11918.1	243.263	3.047695e+000	3.036388e+000	56	44	8.066695e+000	0	0	0	0	0	0	-2.99131	0	0	49.1849	43.3438
DATA	762	9	82	66	1	DarkCorner	DarkCorner	11943.2	242.848	3.042427e+000	3.031140e+000	54	41	6.031624e+000	0	0	0	0	0	0	-5.54292	0	0	49.1849	41.3415
DATA	763	9	83	66	1	DarkCorner	DarkCorner	11968.2	243.422	3.034789e+000	3.023530e+000	55	37	7.591998e+000	0	0	0	0	0	0	-3.95454	0	0	44.7812	37.6275
DATA	764	9	84	66	1	DarkCorner	DarkCorner	11993.8	243.526	3.025220e+000	3.013996e+000	54	41	8.015533e+000	0	0	0	0	0	0	-3.63983	0	0	49.8279	41.9655
DATA	765	9	85	66	1	DarkCorner	DarkCorner	12019.5	243.648	3.013487e+000	3.002306e+000	57	37	8.794699e+000	0	0	0	0	0	0	-2.38706	0	0	65	36.9545
DATA	766	10	1	66	1	DarkCorner	DarkCorner	9898.95	249.228	2.744777e+000	2.734594e+000	63	38	7.653848e+000	0	0	0	0	0	0	-0.433206	0	0	49.8279	37.5
DATA	767	10	2	66	1	DarkCorner	DarkCorner	9924.5	249.5	2.733748e+000	2.723605e+000	59	42	6.758886e+000	0	0	0	0	0	0	-2.6768	0	0	57.5363	41.5556
DATA	768	10	3	66	1	DarkCorner	DarkCorner	9949.89	249.5	2.723037e+000	2.712934e+000	58	42.5	6.394132e+000	0	0	0	0	0	0	-2.61937	0	0	65	42.5278
DATA	769	10	4	66	1	DarkCorner	DarkCorner	9975.04	249.298	2.712681e+000	2.702837e+000	61	41	8.521141e+000	0	0	0	0	0	0	0.316406	0	0	42.9674	41.1212
DATA	770	10	5	66	1	DarkCorner	DarkCorner	10000.6	249.427	2.702225e+000	2.692199e+000	55.5	41.5	8.910051e+000	0	0	0	0	0	0	-5.88229	0	0	57.5363	41.7727
DATA	771	10	6	66	1	DarkCorner	DarkCorner	10026.2	249.391	2.692054e+000	2.682066e+000	56	38	7.890651e+000	0	0	0	0	0	0	-5.20631	0	0	47.2035	39.0645
DATA	772	10	7	0	0	A_64_P139937	XM_001070013	10051.5	249.5	2.682233e+000	2.672282e+000	59.5	39.5	8.600480e+000	0	0	0	0	0	0	-2.34388	0	0	57.5363	40.5556
DATA	773	10	8	0	0	A_44_P185613	XM_001080030	10076.9	249.5	5.714951e+001	6.304858e+000	115.5	38.5	6.919205e+000	0	0	0	0	0	0	53.1541	1	1	65	39.6944
DATA	774	10	9	0	0	A_42_P738520	NM_001007746	10102	249.431	4.151342e+002	4.159816e+001	446	43.5	8.835393e+000	0	0	0	1	0	0	387.421	1	1	48.5334	42.7647
DATA	775	10	10	66	-1	(-)3xSLv1	NegativeControl	10127.8	249.787	2.654633e+000	2.644784e+000	60	39	1.043721e+001	0	0	0	0	0	0	-3.65418	0	0	50.1463	40.1538
DATA	776	10	11	0	0	A_42_P626023	NM_001107265	10153.1	249.5	2.022807e+002	2.039917e+001	250	37	8.265481e+000	0	0	0	0	0	0	190.013	1	1	56.9804	38.5
DATA	777	10	12	0	0	A_43_P11120	XR_085824	10178.4	249.556	9.846849e+002	9.850357e+001	981	42	8.124038e+000	0	0	0	0	0	0	927.756	1	1	48.2044	42
DATA	778	10	13	0	0	A_42_P473425	NM_138844	10203.7	249.5	4.300053e+001	5.035968e+000	103	38	7.290913e+000	0	0	0	0	0	0	40.6297	1	1	65	38.75
DATA	779	10	14	0	0	A_44_P692981	ENSRNOT00000007422	10229.5	249.836	2.835750e+001	3.856674e+000	87	40	6.669448e+000	0	0	0	0	0	0	26.8686	1	1	47.8731	41.1923
DATA	780	10	15	0	0	A_64_P102366	A_64_P102366	10254.1	249.959	2.137588e+001	3.371702e+000	83.5	39.5	9.137771e+000	0	0	0	0	0	0	20.3031	1	1	46.8651	39.1333
DATA	781	10	16	0	0	A_42_P616287	NM_001134555	10280	249.545	1.036986e+002	1.069119e+001	157.5	37	7.800328e+000	0	0	0	0	0	0	98.7232	1	1	55.8519	36.8293
DATA	782	10	17	0	0	A_64_P073995	XM_001081370	10305.4	249.573	4.436572e+001	5.140233e+000	100	38.5	7.383504e+000	0	0	0	0	0	0	42.3273	1	1	57.5363	38.5
DATA	783	10	18	0	0	A_42_P595381	NM_001107258	10330.6	249.608	1.275478e+003	1.275741e+002	1261.5	38	4.120978e+000	0	0	0	0	0	0	1219.2	1	1	49.1849	37.7368
DATA	784	10	19	0	0	A_42_P462205	NM_001007745	10355.9	249.614	2.208015e+003	2.208166e+002	2120.5	38	7.967535e+000	0	0	0	0	0	0	2114.23	1	1	47.2035	40.0333
DATA	785	10	20	0	0	A_64_P016102	A_64_P016102	10381.6	249.746	3.662032e+001	4.481075e+000	100	38	8.934649e+000	0	0	0	0	0	0	35.1187	1	1	46.5243	39.8065
DATA	786	10	21	0	0	A_64_P017829	NM_001128216	10407	249.545	4.528558e+000	2.618741e+000	67	45	9.829031e+000	0	0	0	0	0	0	4.34835	1	0	65	43.2121
DATA	787	10	22	0	0	A_64_P090244	NM_001127449	10432.5	249.648	1.152497e+005	1.152497e+004	110927	41	1.069678e+001	0	0	0	0	0	0	110783	1	1	57.5363	42.2759
DATA	788	10	23	0	0	A_42_P503626	NM_001044247	10457.7	249.985	2.669288e+001	3.708377e+000	88	38	9.401682e+000	0	0	0	0	0	0	25.6805	1	1	45.4864	40.9655
DATA	789	10	24	0	0	A_64_P144850	ENSRNOT00000002335	10482.8	249.935	4.501810e+001	5.185119e+000	103.5	41	8.531581e+000	0	0	0	0	0	0	43.3361	1	1	45.4864	40
DATA	790	10	25	0	0	A_42_P703023	NM_145776	10508.3	249.7	1.681564e+002	1.701119e+001	225	36.5	6.385644e+000	0	0	0	0	0	0	161.929	1	1	46.8651	36.9643
DATA	791	10	26	0	0	A_64_P153581	NM_001109367	10533.9	249.935	3.619744e+001	4.440169e+000	98	42.5	8.496041e+000	0	0	0	0	0	0	34.8625	1	1	54.4085	42.3824
DATA	792	10	27	0	0	A_44_P156782	NM_001013879	10559	249.797	8.792374e+002	8.796134e+001	906	40	9.178248e+000	0	0	0	0	0	0	846.706	1	1	46.8651	39.9024
DATA	793	10	28	0	0	A_43_P12841	NM_053535	10584.4	249.862	1.213638e+002	1.240607e+001	177.5	41.5	7.380351e+000	0	0	0	0	0	0	116.834	1	1	45.4864	42.3929
DATA	794	10	29	0	0	A_64_P097715	NM_001135710	10610.4	249.931	1.257717e+002	1.283790e+001	185.5	41	8.758575e+000	0	0	0	0	0	0	121.005	1	1	53.8203	40.3333
DATA	795	10	30	0	0	A_42_P769597	NM_001106230	10635.4	250.092	4.000037e+002	4.008325e+001	448	39	9.288745e+000	0	0	0	0	0	0	384.536	1	1	49.1849	39.931
DATA	796	10	31	0	0	A_42_P561835	ENSRNOT00000043937	10660.6	250.116	8.590870e+001	8.969630e+000	144	38	9.633052e+000	0	0	0	0	0	0	82.4995	1	1	46.5243	38.0645
DATA	797	10	32	0	0	A_42_P604399	NM_012941	10686	250.203	5.251978e+003	5.252042e+002	5081	38	9.621646e+000	0	0	0	0	0	0	5037.05	1	1	46.8651	39.2381
DATA	798	10	33	0	0	A_42_P744495	NM_017125	10711.4	250	1.458187e+003	1.458416e+002	1442	40	6.196773e+000	0	0	0	0	0	0	1396.33	1	1	48.5334	41
DATA	799	10	34	0	0	A_64_P047391	A_64_P047391	10737.1	250.065	1.427886e+002	1.451203e+001	196	40	8.566604e+000	0	0	0	0	0	0	136.487	1	1	54.4085	41.6207
DATA	800	10	35	0	0	A_44_P856007	NM_001108489	10762.3	250.088	6.796810e+001	7.275753e+000	127	39	6.590135e+000	0	0	0	0	0	0	64.8398	1	1	45.835	39.8667
DATA	801	10	36	0	0	A_64_P057562	ENSRNOT00000031129	10787.6	250.137	2.591838e+002	2.604866e+001	307	39	7.695670e+000	0	0	0	0	0	0	246.707	1	1	48.5334	39.16
DATA	802	10	37	0	0	A_64_P102395	ENSRNOT00000029656	10813	250.215	1.003499e+002	1.036841e+001	159	42	1.063010e+001	0	0	0	0	0	0	95.2863	1	1	45.835	42.9688
DATA	803	10	38	0	0	A_64_P132318	NM_133296	10838.6	250.427	2.482499e+002	2.496236e+001	306	43.5	7.896444e+000	0	0	0	0	0	0	235.098	1	1	57.5363	42.9688
DATA	805	10	40	0	0	A_64_P158848	NM_001130540	10889.2	250.118	4.815846e+002	4.823027e+001	513	41	6.588827e+000	0	0	0	0	0	0	453.357	1	1	46.5243	39.6333
DATA	806	10	41	0	0	A_64_P302888	NM_001135015	10914.6	249.986	4.356633e+001	5.093874e+000	101	38	7.129416e+000	0	0	0	0	0	0	40.8774	1	1	49.1849	39.1667
DATA	807	10	42	0	0	A_42_P604331	NM_001108533	10940.4	250.427	6.225859e+004	6.225859e+003	58902	41.5	1.059446e+001	0	0	0	0	0	0	58213.9	1	1	57.5363	42.9737
DATA	808	10	43	0	0	A_64_P166406	NM_019152	10965.6	249.959	2.993583e+002	3.005365e+001	339	38	7.210442e+000	0	0	0	0	0	0	278.882	1	1	48.5334	37.7619
DATA	809	10	44	0	0	A_64_P123660	NM_001031655	10990.7	250.11	6.714419e+002	6.719720e+001	651	42	9.278966e+000	0	0	0	0	0	0	623.172	1	1	48.5334	42.3929
DATA	810	10	45	0	0	A_42_P668800	NM_001127553	11015.9	250.389	5.582745e+002	5.589169e+001	583	42	9.304642e+000	0	0	0	0	0	0	516.11	1	1	48.2044	41.8276
DATA	811	10	46	0	0	A_64_P090458	NM_001109516	11041.6	250.427	8.999418e+000	2.836734e+000	71	44	8.241516e+000	0	0	0	0	0	0	8.28505	1	0	57.5363	42.5484
DATA	812	10	47	0	0	A_42_P635396	NM_001109506	11067	250.356	1.184924e+003	1.185232e+002	1110	41	7.586746e+000	0	0	0	0	0	0	1086.19	1	1	49.1849	39.9394
DATA	813	10	48	0	0	A_64_P002989	NM_031604	11092.6	250.427	5.438556e+004	5.438557e+003	48918.5	42.5	5.133148e+000	0	0	0	0	0	0	49633.2	1	1	57.5363	43.1429
DATA	814	10	49	0	0	A_44_P914346	DV717012	11118	250.296	9.991396e+002	9.995115e+001	948	38	6.016835e+000	0	0	0	0	0	0	907.689	1	1	47.2035	38.2667
DATA	815	10	50	0	0	A_44_P791176	NM_001130577	11143.4	250.087	1.937403e+001	3.354898e+000	81	40	7.932253e+000	0	0	0	0	0	0	17.5187	1	1	46.5243	40.5714
DATA	816	10	51	0	0	A_64_P011894	NM_001004210	11168.6	250.373	1.512069e+004	1.512071e+003	13439.5	38	6.599846e+000	0	0	0	0	0	0	13609.1	1	1	45.835	38.0833
DATA	817	10	52	0	0	A_42_P717654	XM_001063683	11193.7	250.264	2.155636e+003	2.155813e+002	1902	41	9.067609e+000	0	0	0	0	0	0	1930.88	1	1	47.5395	40.6923
DATA	818	10	53	0	0	A_64_P006102	NM_001100784	11219.5	250.295	1.998138e+002	2.017366e+001	239	42.5	8.274111e+000	0	0	0	0	0	0	178.096	1	1	50.1463	42.5667
DATA	819	10	54	0	0	A_64_P116038	NM_001000335	11244.9	250.5	1.030569e+001	2.976417e+000	71	38	7.482021e+000	0	0	0	0	0	0	9.14068	1	0	65	39.2258
DATA	820	10	55	0	0	A_42_P581567	NM_001011899	11270.5	250.5	6.845988e+001	7.398857e+000	122	43	7.288576e+000	0	0	0	0	0	0	60.4172	1	1	65	42.04
DATA	821	10	56	0	0	A_42_P671206	FQ231880	11295.3	250.408	6.075885e+002	6.082426e+001	584	39	8.642631e+000	0	0	0	0	0	0	533.598	1	1	47.8731	40.4848
DATA	823	10	58	0	0	A_64_P078205	NM_001044255	11346.3	250.222	2.670782e+003	2.670934e+002	2351	38.5	8.357631e+000	0	0	0	0	0	0	2322.07	1	1	47.5395	39.0833
DATA	824	10	59	66	-1	(-)3xSLv1	NegativeControl	11372.2	250.365	2.873564e+000	2.862903e+000	55	34	6.596456e+000	0	0	0	0	0	0	-5.21056	0	0	49.1849	36.5714
DATA	825	10	60	0	0	A_44_P259051	NM_001037658	11397.2	250.254	2.753385e+002	2.768372e+001	295.5	36	5.786153e+000	0	0	0	0	0	0	237.043	1	1	47.5395	36.7097
DATA	826	10	61	0	0	A_64_P325262	A_64_P325262	11422.6	250.573	3.006602e+001	4.170728e+000	87.5	39	6.172781e+000	0	0	0	0	0	0	25.7608	1	1	57.5363	39.6452
DATA	827	10	62	0	0	A_64_P140005	NM_001191804	11448.1	250.5	2.197923e+001	3.642299e+000	82	38.5	7.621859e+000	0	0	0	0	0	0	18.7423	1	1	56.9804	39.3125
DATA	828	10	63	0	0	A_42_P588606	NM_001134544	11473.6	250.849	1.323521e+002	1.355301e+001	174	42	5.938013e+000	0	0	0	0	0	0	112.343	1	1	48.5334	40.48
DATA	829	10	64	0	0	A_42_P788541	NM_001106794	11498.7	250.746	2.349028e+003	2.349211e+002	2044.5	41	8.552470e+000	0	0	0	0	0	0	1985.04	1	1	47.5395	41.25
DATA	830	10	65	0	0	A_44_P1050200	NM_001108000	11524.2	250.621	8.821109e+002	8.826019e+001	819	42	7.971185e+000	0	0	0	0	0	0	742.164	1	1	45.4864	41.8387
DATA	831	10	66	0	0	A_42_P777935	ENSRNOT00000027369	11549.4	250.563	1.290481e+002	1.323902e+001	168	40	8.690633e+000	0	0	0	0	0	0	108.124	1	1	47.8731	41.7931
DATA	832	10	67	0	0	A_44_P349475	NM_031333	11574.8	250.639	6.648509e+002	6.655129e+001	601	40	1.006218e+001	0	0	0	0	0	0	554.85	1	1	47.8731	40.1429
DATA	833	10	68	0	0	A_64_P136188	XM_001059617	11600.5	250.648	1.035886e+002	1.077869e+001	146	40.5	9.290506e+000	0	0	0	0	0	0	86.1223	1	1	57.5363	41.4063
DATA	834	10	69	0	0	A_64_P023386	NM_001106232	11625.6	250.573	2.361318e+004	2.361320e+003	19414	38	8.311381e+000	0	0	0	0	0	0	19563.5	1	1	57.5363	39.5217
DATA	835	10	70	0	0	A_64_P048576	NM_001000163	11651.4	250.729	3.575255e+001	4.666578e+000	88	43	7.972666e+000	0	0	0	0	0	0	29.5245	1	1	47.5395	42.5417
DATA	836	10	71	1028	1	(+)E1A_r60_a20	E1A_r60_a20	11676.7	250.855	3.002057e+001	4.249627e+000	85	37.5	6.614878e+000	0	0	0	0	0	0	24.719	1	1	46.1809	39.1429
DATA	837	10	72	0	0	A_64_P078510	XM_001053102	11702	250.956	5.436146e+002	5.444504e+001	522	39	5.243340e+000	0	0	0	0	0	0	446.456	1	1	46.8651	39.2759
DATA	838	10	73	0	0	A_64_P101533	A_64_P101533	11727.5	251	3.033757e+000	3.022502e+000	55	37	8.172995e+000	0	0	0	0	0	0	-2.92272	0	0	54.1152	37.2581
DATA	839	10	74	0	0	A_64_P164601	ENSRNOT00000050537	11752.8	250.864	6.512173e+001	7.181857e+000	114	42	9.379361e+000	0	0	0	0	0	0	53.2587	1	1	46.1809	41.4
DATA	840	10	75	0	0	A_42_P694928	NM_001109046	11778.1	250.986	1.179120e+002	1.217497e+001	162	39	8.703378e+000	0	0	0	0	0	0	96.2908	1	1	46.8651	39.4146
DATA	841	10	76	0	0	A_42_P510565	ENSRNOT00000046259	11803.3	250.897	6.258900e+002	6.266259e+001	567	41.5	7.072808e+000	0	0	0	0	0	0	510.571	1	1	45.835	39.7692
DATA	842	10	77	0	0	A_64_P050877	XM_001081816	11829	251	1.738522e+001	3.500144e+000	74	38.5	5.932075e+000	0	0	0	0	0	0	14.1735	1	1	54.9904	39.6875
DATA	843	10	78	0	0	A_44_P281352	NM_001013076	11854.5	251	2.177199e+002	2.198295e+001	237	39	9.533193e+000	0	0	0	0	0	0	177.478	1	1	54.1152	39.8966
DATA	844	10	79	0	0	A_44_P269675	ENSRNOT00000031839	11879.5	251	3.901172e+002	3.912976e+001	381.5	37.5	9.048956e+000	0	0	0	0	0	0	318.135	1	1	54.1152	36.5714
DATA	845	10	80	66	1	DarkCorner	DarkCorner	11905.4	251.069	3.045346e+000	3.035877e+000	60.5	40	8.464474e+000	0	0	0	0	0	0	0.860203	0	0	53.8203	39.2258
DATA	846	10	81	66	1	DarkCorner	DarkCorner	11930.1	251.017	3.040863e+000	3.029581e+000	57	42	7.055592e+000	0	0	0	0	0	0	-1.82369	0	0	44.0646	41.5385
DATA	847	10	82	66	1	DarkCorner	DarkCorner	11955.9	251.065	3.034226e+000	3.022969e+000	56	38	8.627358e+000	0	0	0	0	0	0	-2.42387	0	0	54.4085	38.0222
DATA	848	10	83	66	1	DarkCorner	DarkCorner	11981.7	250.754	3.025815e+000	3.014589e+000	58	38.5	6.660205e+000	0	0	0	0	0	0	-2.6549	0	0	46.8651	37.525
DATA	849	10	84	66	1	DarkCorner	DarkCorner	12006.6	251.427	3.015149e+000	3.003963e+000	54	43	8.102057e+000	0	0	0	0	0	0	-3.45942	0	0	57.5363	42.32
DATA	850	10	85	66	1	DarkCorner	DarkCorner	12032.4	251.404	3.002385e+000	2.991246e+000	57.5	33	7.291437e+000	0	0	0	0	0	0	-2.11864	0	0	57.8122	33.9838
DATA	851	11	1	66	1	DarkCorner	DarkCorner	9886.66	255.839	2.746986e+000	2.736795e+000	61	34	7.428646e+000	0	0	0	0	0	0	-0.380405	0	0	44.4243	34.6667
DATA	852	11	2	66	1	DarkCorner	DarkCorner	9911.31	256.932	2.736016e+000	2.725865e+000	62	40.5	6.778688e+000	0	0	0	0	0	0	-1.2093	0	0	48.8603	39.2813
DATA	853	11	3	66	1	DarkCorner	DarkCorner	9937.42	256.573	2.725192e+000	2.715081e+000	61	44	5.191269e+000	0	0	0	0	0	0	-2.27612	0	0	57.5363	44.5833
DATA	854	11	4	66	1	DarkCorner	DarkCorner	9962.53	256.955	2.714604e+000	2.704533e+000	60	43	7.423900e+000	0	0	0	0	0	0	-2.09723	0	0	45.1352	42.3429
DATA	855	11	5	66	1	DarkCorner	DarkCorner	9988	256.545	2.704385e+000	2.694352e+000	57.5	42	8.057507e+000	0	0	0	0	0	0	-5.00742	0	0	55.8519	40.5135
DATA	856	11	6	66	1	DarkCorner	DarkCorner	10014	257.083	2.693808e+000	2.683814e+000	60	41.5	7.991283e+000	0	0	0	0	0	0	-1.43876	0	0	51.7088	41.6316
DATA	857	11	7	0	0	A_64_P077381	A_64_P077381	10039	257.137	2.189961e+001	3.456409e+000	84	40	9.204227e+000	0	0	0	0	0	0	20.2825	1	1	46.8651	40.9697
DATA	858	11	8	0	0	A_64_P085926	NM_030860	10064.2	256.72	7.159198e+002	7.164155e+001	713	38	7.392382e+000	0	0	0	0	0	0	665.38	1	1	49.1849	38.2258
DATA	859	11	9	0	0	A_42_P598560	NM_001033693	10089.6	256.608	5.251758e+002	5.258468e+001	550.5	43	8.986417e+000	0	0	0	0	0	0	489.79	1	1	49.1849	42.5455
DATA	860	11	10	0	1	ETG08_142674	ETG08_142674	10115	256.545	1.240856e+001	2.923144e+000	75.5	41.5	1.067330e+001	0	0	0	0	0	0	11.6113	1	0	55.8519	41.375
DATA	861	11	11	0	0	A_42_P724142	NM_001106340	10140.3	256.913	4.673245e+002	4.680686e+001	491.5	39.5	8.649480e+000	0	0	0	0	0	0	438.724	1	1	46.5243	39.6563
DATA	862	11	12	0	0	A_64_P054193	NM_001014193	10165.7	256.662	1.521293e+004	1.521296e+003	13977	39	7.509928e+000	0	0	0	0	0	0	14325.5	1	1	48.5334	39.5517
DATA	863	11	13	0	0	A_42_P750554	NM_001107846	10191	256.889	6.022887e+002	6.028593e+001	615	40.5	9.315331e+000	0	0	0	0	0	0	568.826	1	1	46.8651	41.1538
DATA	864	11	14	0	0	A_44_P285547	NM_053393	10216.4	257.13	4.889665e+001	5.545026e+000	109	37.5	7.654989e+000	0	0	0	0	0	0	46.3088	1	1	46.8651	38.5667
DATA	865	11	15	0	0	A_42_P623374	NM_138845	10241.6	257.157	8.474072e+002	8.478086e+001	832	38.5	8.328353e+000	0	0	0	1	0	0	804.625	1	1	47.5395	39.8636
DATA	866	11	16	0	0	A_64_P064888	NM_001127303	10267.2	257.212	2.242575e+002	2.257619e+001	269	38	7.723804e+000	0	0	0	0	0	0	213.455	1	1	45.835	37
DATA	867	11	17	0	0	A_44_P522406	NM_001001103	10293.1	256.948	4.432753e+001	5.137084e+000	105	38	8.792786e+000	0	0	0	0	0	0	42.2861	1	1	47.8731	38.2821
DATA	868	11	18	0	0	A_42_P660129	NM_130422	10318.1	256.935	3.267866e+001	4.170438e+000	94	40	9.342966e+000	0	0	0	0	0	0	31.2357	1	1	54.4085	42.4286
DATA	869	11	19	0	0	A_64_P035679	A_64_P035679	10343.5	257	2.905987e+004	2.905988e+003	27241.5	41	8.076756e+000	0	0	0	0	0	0	27827.4	1	1	54.1152	41.6552
DATA	870	11	20	0	0	A_64_P118862	NM_001191999	10368.6	257.145	4.728464e+001	5.387588e+000	107	42	8.991449e+000	0	0	0	0	0	0	45.3519	1	1	44.0646	41.6667
DATA	871	11	21	0	0	A_42_P638181	NM_133395	10394.2	257	3.785965e+003	3.786053e+002	3527	41	9.508071e+000	0	0	0	0	0	0	3636.25	1	1	46.8651	41.1818
DATA	872	11	22	0	0	A_44_P423803	NM_031144	10419.5	257	1.423961e+004	1.423963e+003	13665.5	38.5	8.918990e+000	0	0	0	0	0	0	13692.4	1	1	54.1152	40
DATA	874	11	24	0	0	A_44_P445195	NM_133300	10470.2	257.116	9.283271e+002	9.286831e+001	957	38	8.946706e+000	0	0	0	0	0	0	894.143	1	1	46.5243	39.8919
DATA	875	11	25	0	0	A_42_P563276	NM_013093	10495.6	256.735	8.760003e+001	9.129273e+000	146.5	37.5	7.269837e+000	0	0	0	0	0	0	84.4113	1	1	46.5243	37.5357
DATA	876	11	26	0	0	A_42_P535608	NM_001107160	10521.1	256.803	2.265750e+002	2.280274e+001	281	37	7.988391e+000	0	0	0	0	0	0	218.383	1	1	44.7812	39.2424
DATA	877	11	27	0	0	A_44_P233080	ENSRNOT00000026303	10546.5	256.727	2.002235e+003	2.002400e+002	1978	40	8.264763e+000	0	0	0	0	0	0	1929.85	1	1	46.5243	39.1622
DATA	878	11	28	0	0	A_43_P13320	NM_138880	10572	257.455	8.194120e+000	2.697399e+000	69.5	38	1.027524e+001	0	0	0	0	0	0	7.89671	1	0	55.8519	40.3415
DATA	879	11	29	0	0	A_42_P548007	NM_001135020	10597.2	257.042	4.950819e+003	4.950886e+002	4727.5	42	7.952787e+000	0	0	0	0	0	0	4768.69	1	1	46.8651	41.6944
DATA	880	11	30	0	0	A_44_P282853	NM_031983	10622.6	257.37	1.409013e+003	1.409248e+002	1364.5	40.5	8.676658e+000	0	0	0	0	0	0	1356.27	1	1	48.2044	40.1071
DATA	881	11	31	0	0	A_42_P552341	NM_053519	10647.9	257.356	4.788421e+002	4.795342e+001	525	42	9.151297e+000	0	0	0	0	0	0	460.484	1	1	48.5334	41.2903
DATA	882	11	32	0	0	A_64_P031476	NM_001107172	10673.5	257.455	1.836210e+002	1.854225e+001	238.5	39	1.057030e+001	0	0	0	0	0	0	176.373	1	1	46.5243	39.8649
DATA	883	11	33	0	0	A_42_P620762	NM_024403	10698.9	256.825	6.385329e+003	6.385382e+002	6244	40	7.655613e+000	0	0	0	0	0	0	6124.12	1	1	45.4864	39.4571
DATA	884	11	34	0	0	A_64_P135370	A_64_P135370	10724.2	256.967	2.322412e+002	2.336770e+001	286	39	7.310484e+000	0	0	0	0	0	0	222.378	1	1	44.7812	40.5455
DATA	885	11	35	0	0	A_42_P576202	NM_001108583	10749.5	257.108	3.430537e+002	3.440310e+001	387	38	8.227905e+000	0	0	0	0	0	0	327.876	1	1	48.5334	39.0714
DATA	886	11	36	0	0	A_64_P022879	NM_001109019	10775	257.127	1.987454e+001	3.270068e+000	83	39	5.996304e+000	0	0	0	0	0	0	18.955	1	1	45.4864	40.2069
DATA	887	11	37	0	0	A_42_P711589	NM_022948	10800.2	257.379	2.927168e+003	2.927284e+002	2837	41	1.052527e+001	0	0	0	1	0	0	2785.38	1	1	45.4864	42.1563
DATA	888	11	38	0	0	A_64_P007244	A_64_P007244	10825.9	257.411	4.186563e+003	4.186644e+002	4078	41	9.079944e+000	0	0	0	0	0	0	3973.49	1	1	53.5237	42.7143
DATA	889	11	39	0	0	A_42_P477625	NM_001108719	10851.1	257.608	1.719615e+003	1.719814e+002	1721	37	9.095195e+000	0	0	0	0	0	0	1627.68	1	1	49.1849	38.5484
DATA	890	11	40	0	0	A_64_P153091	XM_341223	10876.6	257.392	5.578395e+002	5.584565e+001	587	41	7.894392e+000	0	0	0	0	0	0	526.429	1	1	49.1849	39.3929
DATA	891	11	41	0	0	A_64_P016347	NM_130819	10901.8	257.551	2.642452e+000	2.632649e+000	58.5	40	6.659297e+000	0	0	0	0	0	0	-2.43289	0	0	50.1463	38.7097
DATA	892	11	42	0	0	A_42_P495598	NM_001014026	10927.5	257.5	3.987169e+000	2.671570e+000	67	38	6.775481e+000	0	0	0	0	0	0	3.73813	1	0	65	38.75
DATA	893	11	43	0	0	A_42_P759043	NM_001134509	10952.9	257.5	2.825182e+002	2.837593e+001	328.5	39	1.111195e+001	0	0	0	0	0	0	263.933	1	1	56.9804	41.2414
DATA	894	11	44	0	0	A_64_P071595	XM_002728361	10978.4	257.573	8.332032e+000	2.788366e+000	72	40	6.945424e+000	0	0	0	0	0	0	7.75489	1	0	57.5363	40.8966
DATA	895	11	45	0	0	A_42_P780882	NM_001008511	11003.6	257.392	3.181632e+003	3.181744e+002	2974.5	46	1.145916e+001	0	0	0	0	0	0	2949.78	1	1	49.1849	44.3043
DATA	896	11	46	0	0	A_64_P044420	NM_001134983	11028.8	257.652	6.511738e+001	7.042428e+000	125	45	7.726943e+000	0	0	0	0	0	0	60.1319	1	1	46.8651	43.6875
DATA	897	11	47	0	0	A_64_P000596	NM_001025732	11054.3	257.662	1.465558e+003	1.465805e+002	1401.5	41	9.248067e+000	0	0	0	0	0	0	1347.65	1	1	48.5334	41.5588
DATA	898	11	48	0	0	A_44_P468873	ENSRNOT00000015693	11079.9	257.5	3.018390e+001	4.053236e+000	90	41	6.541244e+000	0	0	0	0	0	0	27.6339	1	1	56.9804	42
DATA	900	11	50	0	0	A_42_P727022	NM_001107076	11130.4	257.5	4.187678e+003	4.187767e+002	3767.5	38	7.272692e+000	0	0	0	0	0	0	3799.61	1	1	47.8731	39.7273
DATA	901	11	51	0	0	A_64_P135604	NM_001009641	11156.1	257.538	1.596170e+003	1.596406e+002	1531	42	1.077536e+001	0	0	0	0	0	0	1441.43	1	1	44.7812	43.4138
DATA	902	11	52	0	0	A_42_P813939	NM_001108741	11181.1	257.465	8.188236e+002	8.192871e+001	807.5	41	7.991037e+000	0	0	0	0	0	0	735.962	1	1	47.8731	41.24
DATA	903	11	53	0	0	A_64_P052494	A_64_P052494	11206.6	257.573	1.242728e+001	3.034938e+000	71	41	9.009175e+000	0	0	0	0	0	0	11.1159	1	0	65	40.3704
DATA	904	11	54	0	0	A_44_P323678	NM_001107651	11232.4	257.573	8.859612e+000	2.920305e+000	68	42.5	9.213732e+000	0	0	0	0	0	0	7.88529	1	0	57.5363	41.8214
DATA	905	11	55	0	0	A_44_P435764	NM_001191810	11257.6	257.573	8.347170e+000	2.918254e+000	69	42	8.673901e+000	0	0	0	0	0	0	7.39292	1	0	65	41.6452
DATA	906	11	56	0	0	A_42_P688320	NM_001108569	11282.9	258.116	1.312345e+002	1.342091e+001	178	44	8.510237e+000	0	0	0	0	0	0	115.668	1	1	46.8651	43.7
DATA	907	11	57	0	0	A_42_P798500	NM_001014023	11308.2	257.873	2.049260e+002	2.068627e+001	241.5	39	8.384582e+000	0	0	0	1	0	0	179.717	1	1	46.8651	40.7317
DATA	908	11	58	0	0	A_44_P279083	NM_133401	11333.6	257.573	1.964206e+002	1.984606e+001	232.5	36	8.308535e+000	0	0	0	0	0	0	171.395	1	1	57.5363	38.0714
DATA	909	11	59	0	0	A_64_P129850	NM_001002855	11359.5	258	1.319708e+001	3.142963e+000	73	37.5	7.244889e+000	0	0	0	0	0	0	11.4583	1	0	54.1152	38.7647
DATA	910	11	60	0	0	A_64_P029468	NM_001105784	11384.6	257.847	1.461533e+001	3.217503e+000	71.5	38	5.314360e+000	0	0	0	0	0	0	12.6281	1	1	47.8731	36.6364
DATA	911	11	61	0	0	A_43_P18571	NM_001013965	11409.8	257.879	1.806664e+002	1.829479e+001	216	39	5.792200e+000	0	0	0	0	0	0	155.351	1	1	45.835	38.7429
DATA	912	11	62	0	1	ERCC-00104_60	ERCC-00104_60	11435.4	258.169	2.314138e+001	3.705456e+000	82	39	6.694997e+000	0	0	0	0	0	0	19.8042	1	1	45.1352	40.0667
DATA	913	11	63	0	0	A_44_P653701	NM_001106536	11460.5	258	8.620808e+001	9.097894e+000	134	41	6.182643e+000	0	0	0	0	0	0	73.4342	1	1	54.1152	39.9259
DATA	914	11	64	0	0	A_64_P093593	NM_001107077	11485.9	258	2.374788e+002	2.392681e+001	260.5	37	6.608607e+000	0	0	0	0	0	0	201.37	1	1	46.8651	39.1
DATA	915	11	65	0	0	A_44_P1034793	NM_001008300	11511.4	257.761	4.737756e+002	4.746831e+001	451.5	41	8.307385e+000	0	0	0	0	0	0	399.946	1	1	46.5243	41.5667
DATA	916	11	66	0	0	A_42_P768355	NM_057130	11536.8	258	3.806894e+002	3.818277e+001	377	41	9.276501e+000	0	0	0	0	0	0	320.017	1	1	49.1849	40.3529
DATA	917	11	67	0	0	A_44_P714581	NM_001107480	11562.2	258.093	2.434355e+003	2.434535e+002	2096	40	1.064313e+001	0	0	0	0	0	0	2038.11	1	1	48.2044	41.7647
DATA	918	11	68	0	0	A_64_P084521	NM_019351	11587.8	258.084	2.539350e+003	2.539524e+002	2192.5	41	9.895183e+000	0	0	0	0	0	0	2117.78	1	1	49.8279	42.3684
DATA	919	11	69	0	0	A_42_P562625	NM_131913	11613	258	9.879998e+002	9.884492e+001	865	40.5	1.037976e+001	0	0	0	0	0	0	821.008	1	1	46.8651	42.9643
DATA	920	11	70	0	0	A_42_P468662	NM_001108886	11638.4	258.027	7.265963e+002	7.272114e+001	662	42	8.975451e+000	0	0	0	0	0	0	601.759	1	1	48.5334	41.3939
DATA	921	11	71	0	0	A_42_P778587	NM_001135767	11663.6	257.754	2.521445e+002	2.539226e+001	261	40	9.445105e+000	0	0	0	0	0	0	208.177	1	1	45.4864	41.28
DATA	922	11	72	0	0	A_64_P139957	NM_001008525	11689	257.774	8.330639e+003	8.330693e+002	6940	39	5.356736e+000	0	0	0	0	0	0	6858.89	1	1	45.4864	39.1935
DATA	923	11	73	0	0	A_44_P318402	NM_001000187	11714.8	257.423	8.419403e+001	8.943209e+000	129	38.5	6.451978e+000	0	0	0	0	0	0	69.1438	1	1	46.5243	38.2813
DATA	924	11	74	0	0	A_64_P090359	NM_001033565	11739.7	258	1.529064e+001	3.386452e+000	73	43	8.459264e+000	0	0	0	0	0	0	12.533	1	1	45.4864	41.3226
DATA	925	11	75	0	0	A_43_P17778	NM_001134991	11765.1	258.371	2.727875e+001	4.074461e+000	81	40	8.453863e+000	0	0	0	0	0	0	22.3225	1	1	44.4243	40.697
DATA	926	11	76	0	0	A_64_P093176	A_64_P093176	11790.9	258.407	2.409579e+001	3.871651e+000	79	39	8.144184e+000	0	0	0	0	0	0	19.6924	1	1	65	39.7143
DATA	927	11	77	0	0	A_64_P100123	NM_182821	11815.9	258.268	2.115709e+003	2.115927e+002	1792.5	40	6.704109e+000	0	0	0	0	0	0	1727.6	1	1	47.5395	40.4848
DATA	928	11	78	0	0	A_44_P426660	NM_001135717	11841.6	258.125	1.233012e+001	3.275183e+000	69.5	38.5	7.295409e+000	0	0	0	0	0	0	10.0643	1	0	48.5334	39.4667
DATA	929	11	79	0	0	A_42_P696084	NM_031022	11867	258.271	1.382313e+003	1.382646e+002	1157	39	1.058784e+001	0	0	0	0	0	0	1128.49	1	1	46.8651	39.3667
DATA	930	11	80	66	1	DarkCorner	DarkCorner	11892	258.543	3.042840e+000	3.031551e+000	58	36	8.532221e+000	0	0	0	0	0	0	-1.72747	0	0	47.8731	35.9189
DATA	931	11	81	66	1	DarkCorner	DarkCorner	11917.7	258.5	3.039067e+000	3.027792e+000	57.5	42	6.854549e+000	0	0	0	0	0	0	-2.21389	0	0	57.5363	41.7879
DATA	932	11	82	66	1	DarkCorner	DarkCorner	11943.4	258.427	3.033448e+000	3.022194e+000	57	40.5	8.203155e+000	0	0	0	0	0	0	-2.84815	0	0	57.5363	41.3182
DATA	933	11	83	66	1	DarkCorner	DarkCorner	11968.6	258.427	3.026037e+000	3.014810e+000	55.5	37	7.894871e+000	0	0	0	0	0	0	-3.30647	0	0	57.5363	37.0652
DATA	934	11	84	66	1	DarkCorner	DarkCorner	11994.3	258.297	3.016537e+000	3.005346e+000	59	39.5	7.160683e+000	0	0	0	0	0	0	-1.93172	0	0	45.1352	41.3462
DATA	935	11	85	66	1	DarkCorner	DarkCorner	12019.5	258.5	3.004975e+000	2.994801e+000	57.5	40	9.241121e+000	0	0	0	0	0	0	0.632086	0	0	65	40.8857
DATA	936	12	1	66	1	DarkCorner	DarkCorner	9899.66	264	2.737739e+000	2.727582e+000	57	33	7.118835e+000	0	0	0	0	0	0	-4.2394	0	0	45.4864	34.3947
DATA	937	12	2	66	1	DarkCorner	DarkCorner	9924.7	263.818	2.727331e+000	2.717213e+000	58.5	41	7.403138e+000	0	0	0	0	0	0	-1.91582	0	0	45.4864	40.1613
DATA	938	12	3	66	1	DarkCorner	DarkCorner	9948.93	263.911	2.717245e+000	2.707164e+000	59	42.5	7.080200e+000	0	0	0	0	0	0	-3.26484	0	0	42.5954	42.8529
DATA	939	12	4	66	1	DarkCorner	DarkCorner	9975.2	263.836	2.706548e+000	2.696516e+000	60	41	7.324847e+000	0	0	0	0	0	0	0.0660578	0	0	44.7812	40.3256
DATA	940	12	5	66	1	DarkCorner	DarkCorner	10000.6	264	2.696296e+000	2.686293e+000	61	40	9.082121e+000	0	0	0	0	0	0	-0.464711	0	0	46.5243	39.9722
DATA	941	12	6	0	0	A_64_P118227	XM_002728056	10026.1	264	1.651836e+001	3.145062e+000	75	38	8.077366e+000	0	0	0	0	0	0	15.2858	1	1	46.8651	39.3793
DATA	942	12	7	0	0	A_64_P051317	NM_130425	10051.5	264.352	7.654560e+001	8.105739e+000	134	38	7.622284e+000	0	0	0	0	0	0	71.0932	1	1	57.5363	39.1071
DATA	943	12	8	0	0	A_42_P756350	NM_021772	10076.5	264.506	5.325831e+001	5.951968e+000	112	40	7.993100e+000	0	0	0	0	0	0	49.637	1	1	49.8279	41.2
DATA	944	12	9	0	0	A_42_P816479	NM_022278	10102.1	263.825	5.368310e+003	5.368375e+002	4927	45	7.821275e+000	0	0	0	0	0	0	5019.91	1	1	45.4864	43.7879
DATA	945	12	10	0	0	A_64_P351634	NM_001029901	10127.6	263.828	1.645210e+002	1.666255e+001	218.5	40	1.162496e+001	0	0	0	0	0	0	154.35	1	1	44.7812	42.7037
DATA	946	12	11	0	0	A_64_P136597	A_64_P136597	10153	264.455	2.547789e+002	2.561342e+001	297	37.5	8.595909e+000	0	0	0	0	0	0	239.798	1	1	55.8519	38.2
DATA	947	12	12	0	0	A_64_P052017	ENSRNOT00000033592	10178.3	263.841	6.073555e+002	6.079220e+001	642	39	8.332676e+000	0	0	0	0	0	0	573.304	1	1	44.7812	40.1724
DATA	948	12	13	0	0	A_44_P444485	TC589779	10203.3	264.377	8.557583e+002	8.561581e+001	827	38.5	7.440120e+000	0	0	0	0	0	0	810.087	1	1	47.5395	38.6538
DATA	949	12	14	0	0	A_44_P147373	XM_226249	10228.9	264.438	6.358295e+002	6.363646e+001	653	38	7.314741e+000	0	0	0	0	0	0	603.513	1	1	48.5334	38.125
DATA	950	12	15	0	0	A_64_P059939	NM_001134540	10254.2	264.356	1.536983e+004	1.536985e+003	14399.5	38	9.181146e+000	0	0	0	0	0	0	14624.8	1	1	48.5334	39.2963
DATA	951	12	16	0	0	A_42_P637279	NM_012743	10280	264.455	8.246327e+000	2.724515e+000	72	37.5	8.654025e+000	0	0	0	0	0	0	7.86502	1	0	55.8519	38.3235
DATA	952	12	17	0	0	A_42_P771570	XM_001080365	10305.2	264.149	2.833347e+002	2.845173e+001	332	39.5	9.647485e+000	0	0	0	0	0	0	270.79	1	1	46.1809	40.6765
DATA	953	12	18	0	0	A_43_P12942	NM_053817	10330.5	264.176	7.227820e+003	7.227866e+002	6748.5	41	7.750011e+000	0	0	0	0	0	0	6920.98	1	1	48.8603	41.2963
DATA	954	12	19	0	0	A_64_P053307	NM_001191900	10356.2	264.262	1.857552e+001	3.180747e+000	81	38	8.593731e+000	0	0	0	0	0	0	17.8177	1	1	44.4243	39.069
DATA	955	12	20	0	0	A_42_P595630	NM_001013189	10381.3	264.338	1.948914e+003	1.949085e+002	1972	41.5	8.732655e+000	0	0	0	0	0	0	1872.18	1	1	48.5334	42.5
DATA	956	12	21	0	0	A_64_P154760	A_64_P154760	10407	264.455	2.169650e+002	2.184875e+001	272	38	8.352231e+000	0	0	0	0	0	0	208.694	1	1	55.8519	39.122
DATA	957	12	22	0	0	A_42_P764359	NM_145086	10432.1	264.623	8.853576e+002	8.857311e+001	910	39	9.067355e+000	0	0	0	0	0	0	852.51	1	1	46.8651	39.9286
DATA	958	12	23	0	0	A_43_P10405	NM_001109257	10457.3	264.875	3.139600e+001	4.057275e+000	94	39	8.248428e+000	0	0	0	0	0	0	30.2568	1	1	45.835	39.6452
DATA	959	12	24	0	0	A_44_P269950	ENSRNOT00000014054	10483.3	264.5	3.814939e+001	4.598984e+000	99	38.5	8.716545e+000	0	0	0	0	0	0	36.786	1	1	57.5363	39.2333
DATA	960	12	25	0	0	A_44_P160763	NM_001106513	10508.5	264.5	8.898393e+001	9.261403e+000	151	37	6.793662e+000	0	0	0	0	0	0	85.8344	1	1	57.5363	38.6667
DATA	961	12	26	0	0	A_64_P127678	NM_001008553	10533.4	264.411	3.845799e+002	3.854359e+001	433.5	42	8.687951e+000	0	0	0	0	0	0	371.011	1	1	48.5334	41.6585
DATA	962	12	27	0	0	A_42_P684885	NM_133517	10558.8	264.958	4.446273e+000	2.605558e+000	68	38	9.894281e+000	0	0	0	0	0	0	4.28921	1	0	46.8651	39.525
DATA	963	12	28	0	0	A_64_P102708	NM_001034149	10585.2	264.328	1.247553e+001	2.855408e+000	76	41	7.360024e+000	0	0	0	0	0	0	12.0296	1	0	45.1352	40.7931
DATA	964	12	29	0	0	A_42_P547629	NM_001106718	10610.3	264.5	3.487518e+002	3.496974e+001	397.5	40	7.820432e+000	0	0	0	0	0	0	336.097	1	1	57.5363	39.7027
DATA	965	12	30	0	0	A_42_P522285	NM_001044263	10635.1	264.582	2.708233e+002	2.720418e+001	309	38.5	8.716743e+000	0	0	0	0	0	0	260.788	1	1	50.1463	39.5333
DATA	966	12	31	0	0	A_64_P164423	NM_057193	10661.2	264.679	2.046206e+001	3.288796e+000	83	39	9.562093e+000	0	0	0	0	0	0	19.6826	1	1	50.7771	39.0857
DATA	967	12	32	0	0	A_44_P256143	NM_001047917	10686.1	264.824	4.642626e+001	5.310359e+000	107.5	35	7.877014e+000	0	0	0	0	0	0	44.6016	1	1	46.1809	36.1212
DATA	968	12	33	0	0	A_44_P727294	NM_001160314	10711.6	264.568	1.304326e+003	1.304582e+002	1269	39.5	7.659000e+000	0	0	0	0	0	0	1251.1	1	1	49.1849	40.2813
DATA	969	12	34	0	0	A_64_P108404	NM_001000092	10737.3	264.642	4.532000e+001	5.218192e+000	107	40	1.167527e+001	0	0	0	0	0	0	43.3936	1	1	46.1809	42.3871
DATA	970	12	35	0	0	A_44_P520829	NM_001108777	10762.1	264.732	3.634723e+002	3.643951e+001	416.5	41	6.611980e+000	0	0	0	0	0	0	347.35	1	1	47.5395	40.4194
DATA	971	12	36	0	0	A_44_P229677	NM_001014221	10787.6	264.761	5.124153e+002	5.130731e+001	542	42	9.048461e+000	0	0	0	0	0	0	488.601	1	1	46.5243	41.5185
DATA	972	12	37	0	0	A_64_P126215	A_64_P126215	10813.4	264.573	1.174978e+001	2.856693e+000	73	41	9.867440e+000	0	0	0	0	0	0	11.1757	1	0	57.5363	42.4595
DATA	973	12	38	0	0	A_64_P090035	A_64_P090035	10838.6	264.771	8.188947e+002	8.193107e+001	836	41	8.364216e+000	0	0	0	0	0	0	776.858	1	1	47.2035	41.963
DATA	974	12	39	0	0	A_64_P089330	ENSRNOT00000012374	10864.1	264.614	8.649426e+001	9.037015e+000	142.5	39	8.700609e+000	0	0	0	0	0	0	81.8175	1	1	57.259	38.9063
DATA	975	12	40	0	0	A_44_P454429	NM_012712	10889.4	265.153	9.806986e+001	1.015250e+001	156	41	7.044370e+000	0	0	0	0	0	0	92.4902	1	1	42.9674	40.8621
DATA	976	12	41	0	1	ERCC-00144_60	ERCC-00144_60	10914.4	264.712	1.567688e+001	3.065757e+000	76	38	6.779024e+000	0	0	0	0	0	0	14.7369	1	1	45.835	37.9
DATA	977	12	42	0	0	A_42_P759843	XR_086347	10940.1	264.896	2.032583e+003	2.032755e+002	1971	38	7.392794e+000	0	0	0	0	0	0	1904.1	1	1	46.8651	39.1818
DATA	978	12	43	0	0	A_43_P14264	NM_053653	10965.5	264.87	3.213576e+002	3.224511e+001	360	40	7.170095e+000	0	0	0	0	0	0	299.951	1	1	47.2035	39.4444
DATA	979	12	44	0	0	A_64_P011223	NM_024353	10991	265	1.290327e+002	1.317530e+001	188	37	1.177609e+001	0	0	0	0	0	0	119.981	1	1	54.9904	39.0313
DATA	980	12	45	0	0	A_42_P701169	NM_001109572	11016.3	264.986	6.532688e+002	6.538158e+001	671	45	1.146020e+001	0	0	0	0	0	0	605.045	1	1	47.2035	41.4815
DATA	981	12	46	0	0	A_64_P143307	NM_001014106	11041.5	265	3.687730e+002	3.697491e+001	396.5	42.5	7.398341e+000	0	0	0	0	0	0	340.159	1	1	54.1152	42.9286
DATA	982	12	47	0	0	A_44_P480636	NM_001005381	11067	265	1.341977e+002	1.368799e+001	186	40	8.360815e+000	0	0	0	0	0	0	123.258	1	1	46.8651	39.3548
DATA	983	12	48	0	0	A_64_P163564	ENSRNOT00000010609	11092.5	265	5.866837e+001	6.461824e+000	112	41	2.803476e+000	0	0	0	0	0	0	53.6484	1	1	54.1152	40.2778
DATA	984	12	49	0	0	A_42_P774028	NM_001017447	11117.8	264.806	1.276705e+003	1.276995e+002	1227	39	5.762382e+000	0	0	0	0	0	0	1162.2	1	1	47.5395	38.8286
DATA	985	12	50	0	0	A_43_P20110	ENSRNOT00000050558	11143.5	265	1.488530e+001	3.112360e+000	73	42	9.029912e+000	0	0	0	0	0	0	13.4875	1	1	65	41.5938
DATA	986	12	51	0	0	A_44_P552865	NM_001170399	11168.6	264.847	6.467578e+002	6.473406e+001	645.5	43.5	9.703290e+000	0	0	0	0	0	0	583.287	1	1	48.2044	43.0769
DATA	987	12	52	0	0	A_43_P17428	NM_001012189	11194.5	264.764	1.703089e+002	1.725302e+001	217	44	7.932836e+000	0	0	0	0	0	0	152.845	1	1	47.8731	43.9667
DATA	988	12	53	0	0	A_64_P146222	TC633165	11219.5	265.352	1.696009e+004	1.696012e+003	15163.5	41	8.880706e+000	0	0	0	0	0	0	15149.7	1	1	57.5363	40.8125
DATA	989	12	54	0	0	A_64_P054856	NM_001135894	11245.1	264.768	2.610042e+002	2.624875e+001	288.5	43	1.101338e+001	0	0	0	0	0	0	231.972	1	1	46.5243	42.8065
DATA	990	12	55	0	0	A_64_P154982	ENSRNOT00000018118	11270	265.127	5.867875e+003	5.867942e+002	5089.5	41	9.852039e+000	0	0	0	0	0	0	5190.23	1	1	46.8651	41.2963
DATA	991	12	56	0	0	A_42_P726363	NM_031536	11295.6	265.427	2.106576e+001	3.515066e+000	81	42	7.427860e+000	0	0	0	0	0	0	18.541	1	1	57.5363	42.0571
DATA	992	12	57	0	0	A_64_P139685	A_64_P139685	11321.4	265.427	1.675327e+001	3.287119e+000	79	40	9.685211e+000	0	0	0	0	0	0	14.6711	1	1	57.5363	41.4054
DATA	993	12	58	0	0	A_64_P114104	NM_001034136	11346.2	264.727	3.394361e+003	3.394480e+002	2954	36.5	6.440797e+000	0	0	0	0	0	0	2957.83	1	1	45.4864	37.75
DATA	994	12	59	0	0	A_42_P480273	A_42_P480273	11371.6	264.735	2.638192e+003	2.638347e+002	2333	36.5	6.627402e+000	0	0	0	0	0	0	2287.62	1	1	46.5243	37.3235
DATA	995	12	60	0	0	A_64_P004344	ENSRNOT00000047696	11397.1	264.857	5.352210e+003	5.352287e+002	4703	37.5	6.260153e+000	0	0	0	0	0	0	4618.43	1	1	45.4864	36.3125
DATA	996	12	61	0	0	A_42_P723584	NM_001109099	11422.3	265.254	1.580960e+003	1.581223e+002	1395	37	6.081348e+000	0	0	0	0	0	0	1357.82	1	1	47.2035	38.129
DATA	997	12	62	0	0	A_64_P114813	A_64_P114813	11448.1	265.5	7.573715e+000	2.994730e+000	67	39	6.685725e+000	0	0	0	0	0	0	6.47394	1	0	56.9804	39.9677
DATA	998	12	63	0	0	A_64_P034551	NM_053818	11473.5	265.07	8.639872e+001	9.117062e+000	134.5	37	7.547550e+000	0	0	0	0	0	0	73.5093	1	1	48.2044	38.4138
DATA	999	12	64	0	0	A_42_P492976	NM_001126099	11498.5	265.188	1.666158e+002	1.691616e+001	203	38.5	7.355861e+000	0	0	0	0	0	0	141.137	1	1	47.2035	39.75
DATA	1000	12	65	0	0	A_64_P141799	NM_001025709	11523.9	265.333	3.679230e+002	3.690928e+001	370	41	8.919838e+000	0	0	0	0	0	0	310.326	1	1	45.1352	40.2813
DATA	1001	12	66	0	0	A_44_P337088	NM_133609	11549.4	265.286	2.205264e+002	2.224889e+001	244	40	1.039409e+001	0	0	0	0	0	0	185.229	1	1	46.8651	41.037
DATA	1002	12	67	0	0	A_64_P137961	A_64_P137961	11575.1	265.5	6.211789e+001	6.881112e+000	113.5	40	9.537894e+000	0	0	0	0	0	0	51.9692	1	1	56.9804	41.6667
DATA	1003	12	68	0	0	A_64_P053822	ENSRNOT00000028268	11600.5	265.5	6.971523e+001	7.578328e+000	119	40	8.862364e+000	0	0	0	0	0	0	58.1083	1	1	57.5363	40.7826
DATA	1004	12	69	0	0	A_42_P484456	NM_001106601	11625.7	265.318	1.551174e+003	1.551460e+002	1358	40	9.904097e+000	0	0	0	0	0	0	1288.42	1	1	45.835	41.3448
DATA	1005	12	70	0	0	A_44_P508632	NM_001107594	11651.3	265.848	8.886708e+000	3.120361e+000	67	43	9.479561e+000	0	0	0	0	0	0	7.35815	1	0	45.835	42.1724
DATA	1006	12	71	0	0	A_64_P080598	NM_001047865	11676.7	266.017	2.864043e+001	4.147466e+000	85	40	7.284507e+000	0	0	0	0	0	0	23.6458	1	1	44.0646	40.7241
DATA	1007	12	72	0	0	A_64_P144243	A_64_P144243	11702	265.545	2.462969e+001	3.887567e+000	79	38.5	6.262258e+000	0	0	0	0	0	0	20.2802	1	1	55.8519	38.6111
DATA	1008	12	73	0	0	A_44_P479917	NM_030864	11727.5	265.5	1.057699e+001	3.194818e+000	69	42	7.763185e+000	0	0	0	0	0	0	8.6894	1	0	57.5363	41.2727
DATA	1009	12	74	0	0	A_44_P974524	NM_001025764	11752.6	265.344	3.376812e+001	4.530491e+000	87	43	9.923953e+000	0	0	0	0	0	0	27.6895	1	1	43.7019	43.1212
DATA	1010	12	75	0	0	A_42_P522899	NM_021578	11778.1	265.538	8.845571e+001	9.348429e+000	134	38	8.019569e+000	0	0	0	0	0	0	72.4275	1	1	44.7812	38.9722
DATA	1011	12	76	0	0	A_64_P069892	NM_019201	11803.3	265.373	1.151131e+004	1.151135e+003	9329.5	41	6.755585e+000	0	0	0	0	0	0	9415.33	1	1	46.1809	41.069
DATA	1012	12	77	0	0	A_44_P415199	NM_001108748	11829	265.545	2.036668e+001	3.650645e+000	76	38	6.503101e+000	0	0	0	0	0	0	16.6488	1	1	55.8519	39.9032
DATA	1013	12	78	0	0	A_64_P034610	NM_022622	11854.4	265.714	1.092935e+002	1.134157e+001	148	40	9.148684e+000	0	0	0	0	0	0	89.3358	1	1	47.5395	41.0714
DATA	1014	12	79	0	0	A_42_P473828	ENSRNOT00000035309	11879.6	265.573	1.430234e+003	1.430554e+002	1228	35	9.113845e+000	0	0	0	1	0	0	1169.51	1	1	57.5363	35.3929
DATA	1015	12	80	66	1	DarkCorner	DarkCorner	11905.4	265.573	3.037077e+000	3.025809e+000	56	34	9.771121e+000	0	0	0	0	0	0	-1.67143	0	0	57.5363	37.5938
DATA	1016	12	81	66	1	DarkCorner	DarkCorner	11930.5	265.648	3.032403e+000	3.021153e+000	58	40.5	6.634865e+000	0	0	0	0	0	0	-0.697575	0	0	57.5363	39.9167
DATA	1017	12	82	66	1	DarkCorner	DarkCorner	11955.1	265.407	3.026267e+000	3.015039e+000	60	38	9.860545e+000	0	0	0	0	0	0	-0.345932	0	0	43.3362	38.7674
DATA	1018	12	83	66	1	DarkCorner	DarkCorner	11981.5	265.707	3.017336e+000	3.006141e+000	53.5	39	8.876108e+000	0	0	0	0	0	0	-3.3979	0	0	51.4001	39.2162
DATA	1019	12	84	66	1	DarkCorner	DarkCorner	12006.9	265.885	3.006720e+000	2.996075e+000	61	39	7.768187e+000	0	0	0	0	0	0	0.457082	0	0	48.8603	40.037
DATA	1020	12	85	66	1	DarkCorner	DarkCorner	12032.5	265.36	2.994359e+000	2.983249e+000	58.5	34	7.921560e+000	0	0	0	0	0	0	-0.148351	0	0	49.5074	35.1266
DATA	1021	13	1	66	1	DarkCorner	DarkCorner	9886.42	271.427	2.739903e+000	2.729737e+000	57	35	8.105636e+000	0	0	0	0	0	0	-5.96767	0	0	57.5363	35.7218
DATA	1022	13	2	66	1	DarkCorner	DarkCorner	9911.42	271.244	2.729568e+000	2.719441e+000	62	39	6.476502e+000	0	0	0	0	0	0	-0.842053	0	0	50.4627	38.1515
DATA	1023	13	3	66	1	DarkCorner	DarkCorner	9937.42	271.427	2.718749e+000	2.708662e+000	60.5	43.5	7.898978e+000	0	0	0	0	0	0	-2.95578	0	0	57.5363	42.9231
DATA	1024	13	4	66	1	DarkCorner	DarkCorner	9962.14	272	2.708425e+000	2.698376e+000	54	40	6.291111e+000	0	0	0	0	0	0	-6.4527	0	0	36.9964	40.2432
DATA	1025	13	5	66	1	DarkCorner	DarkCorner	9987.85	271.149	2.698463e+000	2.688452e+000	58	42.5	7.661123e+000	0	0	0	0	0	0	-3.74943	0	0	52.6241	40.5476
DATA	1026	13	6	0	0	A_64_P029912	NM_001109143	10013.2	271.644	1.183409e+002	1.213338e+001	168	42	8.519088e+000	0	0	0	0	0	0	109.43	1	1	48.5334	41.9706
DATA	1027	13	7	0	0	A_42_P574731	NM_012948	10038.5	271.427	2.186749e+003	2.186912e+002	2000	37	8.777537e+000	0	0	0	0	0	0	2029.34	1	1	49.1849	36.6129
DATA	1028	13	8	0	0	A_44_P137448	NM_017043	10064.1	271.611	1.588606e+002	1.610709e+001	207.5	40	8.587563e+000	0	0	0	1	0	0	147.954	1	1	48.2044	41.7097
DATA	1029	13	9	0	0	A_42_P770614	NM_001013235	10089.5	271.5	2.057157e+004	2.057159e+003	18880	44	9.704505e+000	0	0	0	1	0	0	19224.9	1	1	57.5363	43.625
DATA	1030	13	10	0	0	A_42_P785419	NM_199501	10114.9	271.5	7.993875e+001	8.418961e+000	137.5	41.5	9.445034e+000	0	0	0	0	0	0	74.9535	1	1	56.9804	41.2188
DATA	1031	13	11	0	0	A_42_P581043	TC622715	10140.1	271.278	3.363963e+003	3.364066e+002	3129	39.5	9.214244e+000	0	0	0	0	0	0	3164.08	1	1	47.8731	39.8333
DATA	1032	13	12	0	0	A_64_P098532	NM_001029928	10165.7	271.5	1.839980e+001	3.205636e+000	77	39	7.102705e+000	0	0	0	0	0	0	17.36	1	1	57.5363	39.6786
DATA	1033	13	13	0	0	A_64_P090758	A_64_P090758	10191.1	271.292	1.194926e+003	1.195213e+002	1195	39	7.827761e+000	0	0	0	0	0	0	1130.64	1	1	47.8731	38.9231
DATA	1034	13	14	0	0	A_43_P12079	NM_021583	10216.2	271.658	8.298051e+001	8.698921e+000	142	39	9.489553e+000	0	0	0	0	0	0	78.7323	1	1	48.2044	39.5806
DATA	1035	13	15	0	0	A_64_P001947	A_64_P001947	10241.9	271.5	1.749448e+001	3.136761e+000	78.5	37	8.484193e+000	0	0	0	0	0	0	16.6415	1	1	56.9804	37.3077
DATA	1036	13	16	0	0	A_64_P064461	A_64_P064461	10267.1	271.716	3.689000e+001	4.511667e+000	97	38	9.665846e+000	0	0	0	0	0	0	35.1752	1	1	45.835	40
DATA	1037	13	17	0	0	A_42_P575398	NM_020538	10292.2	271.782	2.836618e+000	2.607200e+000	64	39	8.910528e+000	0	0	0	0	0	0	2.71067	1	0	50.1463	39.2353
DATA	1038	13	18	0	0	A_42_P482623	NM_199463	10318.1	271.611	6.082597e+002	6.088093e+001	654	37.5	9.008611e+000	0	0	0	0	0	0	582.424	1	1	48.2044	37.7647
DATA	1039	13	19	0	0	A_42_P738431	NM_019175	10343.4	271.556	7.297314e+002	7.301880e+001	749	39	8.007572e+000	0	0	0	0	0	0	699.985	1	1	48.2044	39.6061
DATA	1040	13	20	0	0	A_44_P1027780	ENSRNOT00000065815	10368.9	271.5	1.691157e+001	3.083026e+000	81	38	8.586229e+000	0	0	0	0	0	0	16.248	1	1	56.9804	38.84
DATA	1041	13	21	0	0	A_42_P479802	NM_053679	10394.1	271.657	8.479636e+002	8.483542e+001	887	44	8.145765e+000	0	0	0	0	0	0	815.82	1	1	45.835	43.3947
DATA	1042	13	22	0	0	A_44_P496624	NM_022302	10419.9	271.608	6.913039e+001	7.375725e+000	129.5	38	5.149381e+000	0	0	0	0	0	0	66.5875	1	1	48.5334	37.25
DATA	1043	13	23	0	0	A_42_P700753	FQ212883	10444.8	271.875	8.662725e+002	8.666533e+001	903	35.5	6.444079e+000	0	0	0	0	0	0	835.198	1	1	47.5395	35.6154
DATA	1044	13	24	0	0	A_44_P229299	NM_001100678	10470.2	271.882	3.261908e+002	3.271993e+001	381.5	39	7.857114e+000	0	0	0	0	0	0	314.712	1	1	46.5243	39.6486
DATA	1045	13	25	0	0	A_42_P728472	NM_001007600	10495.6	271.392	6.584020e+003	6.584070e+002	6382.5	41.5	9.412575e+000	0	0	0	0	0	0	6355.01	1	1	49.1849	40.3214
DATA	1046	13	26	0	0	A_42_P488904	NM_001108947	10521	271.809	4.684401e+003	4.684472e+002	4497	41.5	9.196024e+000	0	0	0	0	0	0	4522.79	1	1	46.8651	40.9737
DATA	1047	13	27	0	0	A_42_P458494	NM_001034951	10546.8	271.831	6.970448e+001	7.427449e+000	132	41	9.383966e+000	0	0	0	0	0	0	67.3004	1	1	46.8651	40
DATA	1048	13	28	0	0	A_64_P100331	ENSRNOT00000048614	10572.1	271.762	1.260455e+001	2.858624e+000	75.5	37	9.191397e+000	0	0	0	0	0	0	12.1669	1	0	45.1352	37.6923
DATA	1049	13	29	0	0	A_64_P113989	NM_181631	10597.1	271.786	4.459456e+003	4.459530e+002	4377	39.5	9.513789e+000	0	0	0	0	0	0	4302.67	1	1	46.8651	40.525
DATA	1050	13	30	0	0	A_64_P042105	ENSRNOT00000061599	10622.9	272.029	3.607319e+001	4.428404e+000	96.5	38	6.671880e+000	0	0	0	0	0	0	34.781	1	1	46.8651	38.2258
DATA	1051	13	31	0	0	A_64_P044435	NM_001015020	10648.5	272	1.962379e+002	1.979150e+001	255	44	8.947372e+000	0	0	0	0	0	0	189.028	1	1	54.1152	42.0571
DATA	1052	13	32	0	0	A_64_P149011	NM_031352	10673.6	272	2.539508e+003	2.539639e+002	2462	41	8.229833e+000	0	0	0	0	0	0	2443.35	1	1	50.4627	38.7857
DATA	1053	13	33	0	0	A_42_P580844	NM_019296	10698.7	271.667	3.419054e+002	3.428758e+001	389	38	8.578794e+000	0	0	0	0	0	0	328.489	1	1	43.7019	38.9355
DATA	1054	13	34	0	0	A_64_P052972	A_64_P052972	10724.2	272	8.650149e+001	9.027266e+000	145.5	39.5	8.284203e+000	0	0	0	0	0	0	82.9738	1	1	46.8651	41.2188
DATA	1055	13	35	0	0	A_44_P454300	NM_001003979	10749.7	272.318	2.596344e+000	2.595755e+000	64.5	39	8.109999e+000	0	0	0	0	0	0	2.07275	0	0	45.835	38.1852
DATA	1056	13	36	0	0	A_44_P149743	ENSRNOT00000005476	10774.8	272.016	1.757030e+001	3.131534e+000	78	41	6.871648e+000	0	0	0	0	0	0	16.7873	1	1	45.4864	40.4333
DATA	1057	13	37	0	0	A_42_P841017	NM_173309	10800.2	271.899	3.486040e+003	3.486137e+002	3280	39	7.893487e+000	0	0	0	0	0	0	3322.92	1	1	46.5243	40.25
DATA	1058	13	38	0	0	A_44_P206844	NM_013074	10825.8	272.088	5.768723e+001	6.329554e+000	115.5	41	6.961322e+000	0	0	0	0	0	0	54.8488	1	1	46.5243	41.72
DATA	1059	13	39	0	0	A_64_P073400	NM_001000705	10851.5	272	1.339687e+002	1.364915e+001	195	39	8.754169e+000	0	0	0	0	0	0	127.022	1	1	54.1152	39.9706
DATA	1060	13	40	0	0	A_64_P066676	A_64_P066676	10876.6	271.828	2.239345e+001	3.446435e+000	85	42	7.552585e+000	0	0	0	0	0	0	21.17	1	1	44.7812	40.8077
DATA	1061	13	41	0	0	A_44_P386965	NM_001134594	10902.2	272.419	8.785263e+000	2.770883e+000	70.5	40	8.877519e+000	0	0	0	0	0	0	8.27955	1	0	43.7019	39.8966
DATA	1062	13	42	0	0	A_64_P095895	NM_019338	10927.4	272.07	3.768809e+001	4.599621e+000	98.5	38	7.067853e+000	0	0	0	0	0	0	35.3994	1	1	47.5395	38.5
DATA	1063	13	43	1028	1	(+)E1A_r60_a22	E1A_r60_a22	10953	271.729	1.413787e+002	1.438340e+001	194	39	7.262337e+000	0	0	0	1	0	0	132.315	1	1	46.8651	38.5294
DATA	1064	13	44	0	0	A_42_P541625	NM_001126090	10977.9	271.956	1.001963e+004	1.001967e+003	9087	40	7.327515e+000	0	0	0	0	0	0	9343.48	1	1	46.8651	39.6774
DATA	1065	13	45	0	0	A_64_P033895	NM_001126084	11003.6	272.027	1.059135e+002	1.092179e+001	163.5	42	1.241915e+001	0	0	0	0	0	0	98.3821	1	1	48.5334	39.3462
DATA	1066	13	46	0	0	A_64_P012546	NM_022300	11029.1	272.407	4.712832e+004	4.712833e+003	43428.5	43.5	1.026858e+001	0	0	0	0	0	0	43601.9	1	1	56.9804	42.9333
DATA	1067	13	47	0	0	A_42_P495598	NM_001014026	11054.5	272.352	5.761053e+000	2.749205e+000	68	39.5	8.410987e+000	0	0	0	0	0	0	5.30775	1	0	65	40.8214
DATA	1068	13	48	0	0	A_42_P483463	NM_001130999	11079.7	272.155	1.606085e+003	1.606312e+002	1563	39	7.241722e+000	0	0	0	0	0	0	1473.35	1	1	47.5395	38.4063
DATA	1069	13	49	0	0	A_42_P575104	NM_153737	11105.2	271.879	2.323491e+002	2.339264e+001	274	41	6.915465e+000	0	0	0	0	0	0	212.192	1	1	45.835	40.9032
DATA	1070	13	50	0	0	A_42_P461726	NM_133549	11130.9	272.587	2.293850e+001	3.561299e+000	81	40.5	7.208197e+000	0	0	0	0	0	0	20.8543	1	1	44.4243	39.7353
DATA	1071	13	51	0	0	A_64_P098688	A_64_P098688	11156.1	272.5	4.955031e+004	4.955032e+003	45648.5	43	8.900389e+000	0	0	0	0	0	0	44839.9	1	1	56.9804	43.4286
DATA	1072	13	52	0	0	A_64_P105797	A_64_P105797	11181.4	272.123	2.816057e+001	3.936030e+000	85	44.5	8.040129e+000	0	0	0	0	0	0	25.362	1	1	42.9674	45.2895
DATA	1073	13	53	0	0	A_42_P545943	NM_019291	11206.8	272.5	2.910147e+003	2.910278e+002	2663.5	38	8.654479e+000	0	0	0	0	0	0	2608.53	1	1	46.5243	39
DATA	1074	13	54	0	0	A_44_P520045	NM_001001371	11232.4	272.5	8.779657e+001	9.208256e+000	140	38	7.457466e+000	0	0	0	0	0	0	78.3116	1	1	47.8731	38.8
DATA	1075	13	55	0	0	A_44_P306964	NM_001012184	11257.7	272.38	2.148734e+001	3.521768e+000	81	39	9.253770e+000	0	0	0	0	0	0	19.072	1	1	48.2044	40.0323
DATA	1076	13	56	0	0	A_44_P156043	NM_001039012	11282.6	272.521	7.591402e+002	7.596578e+001	743	41.5	6.950792e+000	0	0	0	0	0	0	670.567	1	1	48.2044	41.5938
DATA	1077	13	57	0	0	A_64_P054686	TC585752	11308.2	271.723	1.220843e+004	1.220846e+003	10513	40	8.435725e+000	0	0	0	0	0	0	10729	1	1	45.835	41.0263
DATA	1078	13	58	0	0	A_42_P575104	NM_153737	11333.5	272.452	2.342781e+002	2.359833e+001	260	42	9.535794e+000	0	0	0	0	0	0	204.898	1	1	49.1849	43.0882
DATA	1079	13	59	0	0	A_64_P142194	NM_053426	11358.9	272.232	9.145641e+002	9.150068e+001	853.5	41	7.804942e+000	0	0	0	0	0	0	795.903	1	1	46.5243	39.8529
DATA	1080	13	60	0	0	A_64_P043314	A_64_P043314	11384.5	272.5	3.895120e+001	4.832227e+000	95	39.5	6.356908e+000	0	0	0	0	0	0	33.7326	1	1	57.5363	37.9063
DATA	1081	13	61	0	0	A_44_P684315	NM_001109104	11410	272.545	2.149738e+004	2.149740e+003	18067	38	7.137663e+000	0	0	0	0	0	0	18527.4	1	1	55.8519	37.2903
DATA	1082	13	62	0	0	A_64_P142620	NM_201417	11435.4	272.427	3.857104e+001	4.818106e+000	94	39	6.235235e+000	0	0	0	0	0	0	33.0845	1	1	49.1849	40.4667
DATA	1083	13	63	0	0	A_42_P568419	NM_001011894	11460.8	272.589	1.215236e+003	1.215582e+002	1108.5	37	7.504887e+000	0	0	0	1	0	0	1037.56	1	1	52.6241	39.36
DATA	1084	13	64	0	0	A_42_P519868	NM_053906	11486.2	272.575	1.219669e+002	1.253995e+001	167	38	6.814240e+000	0	0	0	1	0	0	103.663	1	1	48.5334	38.7143
DATA	1085	13	65	0	0	A_43_P12346	NM_022943	11511.6	272.373	1.039601e+002	1.080016e+001	153	40	9.021718e+000	0	0	0	0	0	0	87.9697	1	1	45.835	39.5161
DATA	1087	13	67	0	0	A_44_P556989	NM_012610	11562.4	272.573	4.108537e+001	5.058514e+000	95	40	1.040173e+001	0	0	0	0	0	0	34.4811	1	1	57.5363	41.5294
DATA	1088	13	68	0	0	A_64_P113079	XM_218149	11588	272.603	8.929316e+000	3.094059e+000	69	41	9.450676e+000	0	0	0	0	0	0	7.46514	1	0	46.1809	42.3793
DATA	1089	13	69	0	0	A_64_P003937	NM_173111	11612.8	272.487	3.482290e+003	3.482417e+002	2931	39	9.060861e+000	0	0	0	0	0	0	2901.05	1	1	49.1849	40.1071
DATA	1090	13	70	0	0	A_42_P771337	NM_001012015	11638.2	272.657	6.684089e+001	7.319418e+000	117	40.5	1.014510e+001	0	0	0	0	0	0	55.4995	1	1	47.2035	41.6389
DATA	1091	13	71	0	0	A_44_P401035	A_44_P401035	11663.9	272.614	5.166100e+001	5.969995e+000	103.5	40	7.331439e+000	0	0	0	0	0	0	42.7623	1	1	57.259	40
DATA	1092	13	72	0	0	A_42_P536292	NM_033359	11689	272.932	3.871574e+002	3.883180e+001	378	41.5	6.597544e+000	0	0	0	0	0	0	319.616	1	1	46.8651	40.7
DATA	1093	13	73	0	0	A_44_P128564	NM_001109121	11714.6	272.507	1.114738e+002	1.154598e+001	151	40	7.438798e+000	0	0	0	0	0	0	91.7956	1	1	46.5243	39.75
DATA	1094	13	74	0	0	A_64_P069957	NM_173315	11740.1	272.935	8.164134e+000	3.122207e+000	67	43	7.630804e+000	0	0	0	0	0	0	6.70954	1	0	65	42.6667
DATA	1095	13	75	0	0	A_44_P538691	NM_031772	11765.4	272.716	6.108375e+001	6.813589e+000	106	40.5	8.399134e+000	0	0	0	0	0	0	50.1148	1	1	46.5243	41
DATA	1096	13	76	0	0	A_44_P499231	NM_001034148	11790.8	272.826	1.975476e+002	1.998464e+001	224	40	8.706690e+000	0	0	0	0	0	0	161.873	1	1	46.1809	42.5
DATA	1097	13	77	0	0	A_64_P121489	XM_001065883	11815.9	272.89	8.923841e+000	3.153778e+000	66	39	6.820199e+000	0	0	0	0	0	0	7.30646	1	0	46.8651	39.4688
DATA	1098	13	78	0	0	A_42_P507072	FQ213070	11841.4	273.028	1.439352e+003	1.439670e+002	1215	42	8.196930e+000	0	0	0	0	0	0	1178.1	1	1	48.2044	40.7586
DATA	1099	13	79	0	0	A_64_P120075	ENSRNOT00000027841	11867.2	273.103	2.626007e+002	2.643377e+001	276	38	9.331445e+000	0	0	0	0	0	0	214.974	1	1	46.5243	39.4
DATA	1100	13	80	0	0	A_44_P1007362	NM_138864	11892.3	273.125	1.227546e+002	1.264228e+001	162.5	34	1.255983e+001	0	0	0	0	0	0	100.56	1	1	45.4864	39.2778
DATA	1101	13	81	66	1	DarkCorner	DarkCorner	11917.1	273.068	3.030874e+000	3.019629e+000	55	40	8.737629e+000	0	0	0	0	0	0	-4.267	0	0	43.7019	40.1154
DATA	1102	13	82	66	1	DarkCorner	DarkCorner	11943	273.29	3.025083e+000	3.013859e+000	59.5	39	6.622828e+000	0	0	0	0	0	0	-1.99156	0	0	46.1809	39.3235
DATA	1103	13	83	66	1	DarkCorner	DarkCorner	11968.5	273	3.017736e+000	3.006540e+000	59	39	1.031331e+001	0	0	0	0	0	0	-1.89595	0	0	65	40.4167
DATA	1104	13	84	66	1	DarkCorner	DarkCorner	11994	272.676	3.008453e+000	2.997292e+000	60	40.5	7.550720e+000	0	0	0	0	0	0	-2.12027	0	0	45.835	42.3235
DATA	1105	13	85	66	1	DarkCorner	DarkCorner	12019.3	273.188	2.996678e+000	2.985560e+000	60	36.5	6.397467e+000	0	0	0	0	0	0	-0.81246	0	0	45.4864	37.8409
DATA	1106	14	1	66	1	DarkCorner	DarkCorner	9898.74	278.487	2.731577e+000	2.728492e+000	64	38.5	8.955935e+000	0	0	0	0	0	0	1.78376	0	0	50.4627	39.0227
DATA	1107	14	2	66	1	DarkCorner	DarkCorner	9924.99	278.473	2.720790e+000	2.710696e+000	57	41	7.794732e+000	0	0	0	0	0	0	-5.14858	0	0	48.5334	39.2143
DATA	1108	14	3	66	1	DarkCorner	DarkCorner	9949.64	278.342	2.710807e+000	2.700750e+000	53	41	7.926872e+000	0	0	0	0	0	0	-7.16696	0	0	48.8603	39.6
DATA	1109	14	4	66	1	DarkCorner	DarkCorner	9974.58	278.344	2.700794e+000	2.690774e+000	58	40	7.934510e+000	0	0	0	0	0	0	-3.71692	0	0	53.2255	39.6486
DATA	1110	14	5	66	1	DarkCorner	DarkCorner	10000.4	278.645	2.690482e+000	2.680500e+000	57	42	8.265138e+000	0	0	0	0	0	0	-4.5161	0	0	44.0646	41
DATA	1111	14	6	0	0	A_64_P151415	NM_001191684	10026.1	278.614	1.142298e+002	1.173102e+001	169	35	6.935190e+000	0	0	0	0	0	0	105.931	1	1	57.259	36.5926
DATA	1112	14	7	0	0	A_42_P475623	NM_053394	10051.2	279.284	3.468176e+002	3.478370e+001	377.5	38	1.084032e+001	0	0	0	0	0	0	322.785	1	1	45.835	38.0667
DATA	1113	14	8	0	0	A_44_P123636	ENSRNOT00000023689	10076.7	278.704	2.661910e+000	2.652762e+000	64	41	7.035242e+000	0	0	0	0	0	0	0.580411	0	0	48.2044	41.1935
DATA	1114	14	9	0	0	A_64_P135207	ENSRNOT00000043866	10102.3	278.465	1.825512e+002	1.844548e+001	234.5	46	1.132364e+001	0	0	0	0	0	0	171.05	1	1	47.2035	44.9688
DATA	1115	14	10	0	0	A_42_P516693	NM_001107330	10127.3	278.613	3.242606e+000	2.654596e+000	66	39	1.013818e+001	0	0	0	0	0	0	3.04807	1	0	44.4243	41.1
DATA	1116	14	11	0	0	A_64_P125447	NM_001109231	10153	278.806	6.415001e+001	6.931826e+000	121	38	9.785759e+000	0	0	0	0	0	0	60.4924	1	1	46.1809	39.7586
DATA	1117	14	12	0	0	A_42_P701756	NM_001107646	10178.5	279	9.924298e+002	9.927752e+001	980	38	6.486759e+000	0	0	0	0	0	0	938.641	1	1	54.1152	37.1786
DATA	1118	14	13	0	0	A_44_P344181	NM_017204	10203.3	278.986	3.476410e+002	3.486204e+001	389	39.5	7.968010e+000	0	0	0	0	0	0	329.699	1	1	48.5334	37.8182
DATA	1119	14	14	0	0	A_64_P035330	ENSRNOT00000066415	10229.2	279	4.916217e+002	4.923111e+001	528	38	7.840338e+000	0	0	0	0	0	0	467.504	1	1	46.8651	37.7143
DATA	1120	14	15	0	0	A_42_P837533	NM_001134546	10254.5	279	2.667349e+003	2.667475e+002	2570	37.5	9.285731e+000	0	0	0	0	0	0	2542.7	1	1	48.5334	39.0313
DATA	1121	14	16	0	0	A_42_P744291	NM_001025729	10279.7	279.1	7.429615e+002	7.434135e+001	759	37	8.447232e+000	0	0	0	0	0	0	709.853	1	1	47.2035	38.913
DATA	1122	14	17	0	0	A_44_P149267	NM_001013099	10305.4	279.058	1.181658e+001	2.843825e+000	74	39	1.021656e+001	0	0	0	0	0	0	11.3138	1	0	47.2035	38.4063
DATA	1123	14	18	0	0	A_64_P002546	NM_144741	10330.7	278.904	5.936600e+000	2.649270e+000	69	39	8.582099e+000	0	0	0	0	0	0	5.6946	1	0	48.8603	36.963
DATA	1124	14	19	0	0	A_42_P808236	NM_001107189	10356.5	279	5.461774e+002	5.467852e+001	584.5	35	7.570685e+000	0	0	0	1	0	0	524.817	1	1	54.1152	36.6207
DATA	1125	14	20	0	0	A_44_P425848	NM_001108747	10381.4	279.028	1.369120e+002	1.393101e+001	196.5	40	7.225850e+000	0	0	0	0	0	0	131.749	1	1	48.2044	40.2903
DATA	1126	14	21	0	0	A_43_P17405	TC612613	10407	279	9.781447e+001	1.011355e+001	153	40	7.289044e+000	0	0	0	0	0	0	94.2447	1	1	54.9904	40.2895
DATA	1127	14	22	0	0	A_64_P022402	NM_001142304	10432.5	279	9.602118e+000	2.741440e+000	73	38	6.338560e+000	0	0	0	0	0	0	9.26135	1	0	54.1152	37.0345
DATA	1128	14	23	0	0	A_44_P1019726	ENSRNOT00000025138	10457.6	279.427	9.219362e+001	9.569685e+000	153.5	38.5	8.109238e+000	0	0	0	0	0	0	88.9978	1	1	57.5363	38.9545
DATA	1129	14	24	0	0	A_44_P128186	NM_053305	10483.2	279.306	9.852030e+001	1.018023e+001	161	39.5	9.035863e+000	0	0	0	0	0	0	95.1603	1	1	47.5395	40.1944
DATA	1130	14	25	0	0	A_44_P203665	NM_001105725	10508.2	278.823	8.938695e+001	9.298976e+000	151	40	6.071244e+000	0	0	0	0	0	0	86.3641	1	1	45.1352	38.88
DATA	1131	14	26	0	0	A_42_P688802	DV723748	10533.9	279.386	1.169512e+003	1.169793e+002	1167	40	9.937874e+000	0	0	0	0	0	0	1130.18	1	1	57.259	40.6571
DATA	1132	14	27	0	0	A_64_P129943	NM_001105712	10559.2	278.677	2.201504e+002	2.216377e+001	275	40	9.144009e+000	0	0	0	0	0	0	212.706	1	1	45.4864	39.7097
DATA	1133	14	28	0	0	A_64_P017577	NM_001106982	10584.6	279.427	2.698750e+001	3.722547e+000	87	38	1.073230e+001	0	0	0	0	0	0	26.0681	1	1	57.5363	40.4815
DATA	1134	14	29	0	0	A_44_P235926	NM_024138	10610.2	279.43	2.416629e+002	2.430209e+001	304	37.5	6.961058e+000	0	0	0	0	0	0	233.293	1	1	58.0869	38.2941
DATA	1135	14	30	0	0	A_42_P611638	NM_001034137	10635.3	279.361	4.727904e+002	4.734871e+001	525	40	7.675719e+000	0	0	0	0	0	0	456.041	1	1	48.2044	40.3333
DATA	1136	14	31	0	0	A_42_P654878	NM_001107919	10660.9	279.5	8.756795e+002	8.760567e+001	905	42.5	1.038956e+001	0	0	0	0	0	0	843.774	1	1	56.9804	41.2353
DATA	1137	14	32	0	0	A_64_P017464	NM_001135687	10686.4	279.427	2.583244e+000	2.573660e+000	61	37	8.872314e+000	0	0	0	0	0	0	-0.0179557	0	0	57.5363	38.5556
DATA	1138	14	33	0	0	A_64_P152873	NM_001207022	10711.6	279.427	5.163741e+001	5.771306e+000	114	39	1.077150e+001	0	0	0	0	0	0	49.6161	1	1	65	41.8929
DATA	1139	14	34	0	0	A_64_P013243	A_64_P013243	10736.6	279.243	2.512370e+003	2.512503e+002	2441	38	1.120349e+001	0	0	0	0	0	0	2409.81	1	1	47.2035	39.5806
DATA	1140	14	35	0	0	A_64_P029720	NM_001109405	10762.2	279.25	9.712226e+001	1.005092e+001	152.5	40	6.530656e+000	0	0	0	0	0	0	92.9722	1	1	45.1352	40.129
DATA	1141	14	36	0	0	A_43_P13459	NM_001107548	10787.4	279.108	1.216327e+002	1.243658e+001	180	38	7.223143e+000	0	0	0	0	0	0	116.179	1	1	44.7812	38.5926
DATA	1142	14	37	0	0	A_64_P053923	NM_001107323	10812.9	279.232	5.753152e+002	5.759020e+001	610.5	41	7.333671e+000	0	0	0	0	0	0	548.195	1	1	46.5243	41.5128
DATA	1143	14	38	0	0	A_44_P1005199	ENSRNOT00000032786	10838.2	279.531	1.682322e+001	3.101757e+000	78	43.5	8.220747e+000	0	0	0	0	0	0	15.9888	1	1	44.7812	42.1071
DATA	1144	14	39	0	0	A_44_P104821	NM_024369	10864.1	279.5	1.284864e+002	1.311174e+001	182.5	41.5	7.752695e+000	0	0	0	0	0	0	121.76	1	1	56.9804	41.6765
DATA	1145	14	40	0	0	A_64_P009956	A_64_P009956	10889.4	279.577	2.202316e+002	2.217862e+001	272	42	6.486888e+000	0	0	0	0	0	0	208.073	1	1	47.8731	41.9167
DATA	1146	14	41	0	0	A_64_P060947	NM_203334	10914.7	279.5	1.989636e+001	3.297710e+000	83	41.5	9.261058e+000	0	0	0	0	0	0	18.7371	1	1	57.5363	41.2857
DATA	1147	14	42	0	0	A_64_P103419	NM_001106291	10939.8	279.09	3.136607e+000	2.657527e+000	65	39	6.757489e+000	0	0	0	0	0	0	2.9437	1	0	46.1809	38.9459
DATA	1148	14	43	0	0	A_44_P220827	NM_001012051	10965.5	279.358	3.495656e+002	3.505675e+001	392	38	7.273340e+000	0	0	0	0	0	0	326.884	1	1	46.5243	38.5172
DATA	1149	14	44	0	1	ETG07_105829	ETG07_105829	10991	279.545	1.210879e+001	2.921286e+000	74	36.5	8.843206e+000	0	0	0	0	0	0	11.2805	1	0	65	36.7333
DATA	1150	14	45	0	0	A_42_P719478	NM_001191779	11016.4	279.573	9.524615e+000	2.833866e+000	72	42	9.630105e+000	0	0	0	0	0	0	8.83816	1	0	57.5363	40.1034
DATA	1151	14	46	0	0	A_42_P462257	NM_001109481	11041.5	279.529	5.887714e+003	5.887775e+002	5484.5	38	1.016995e+001	0	0	0	0	0	0	5441.31	1	1	47.2035	41.1935
DATA	1152	14	47	0	0	A_44_P105634	NM_001007658	11067.2	279.918	1.411047e+002	1.436482e+001	194	39	3.938760e+000	0	0	0	0	0	0	129.856	1	1	46.8651	38.8261
DATA	1153	14	48	0	0	A_64_P100594	NM_001000360	11092.4	279.403	6.786195e+001	7.304722e+000	125	41	8.839063e+000	0	0	0	0	0	0	62.1778	1	1	44.0646	42.25
DATA	1154	14	49	0	0	A_64_P004266	A_64_P004266	11118	279.545	1.479346e+001	3.092108e+000	75	38	6.412697e+000	0	0	0	0	0	0	13.4934	1	1	55.8519	38.7714
DATA	1155	14	50	0	0	A_44_P156343	NM_001000102	11143.4	279.573	9.167681e+000	2.877696e+000	70	42	7.827860e+000	0	0	0	0	0	0	8.32373	1	0	57.5363	41.6538
DATA	1156	14	51	0	0	A_42_P504358	NM_001108674	11168.6	279.573	1.050957e+002	1.086099e+001	158.5	42.5	1.001289e+001	0	0	0	1	0	0	94.9791	1	1	65	42.9643
DATA	1157	14	52	0	0	A_44_P281468	NM_001127556	11195.3	279.391	1.316729e+001	3.052866e+000	75	42.5	7.608807e+000	0	0	0	0	0	0	11.8399	1	0	45.1352	43.5
DATA	1158	14	53	0	0	A_43_P12785	NM_053364	11219.3	280.041	5.879121e+000	2.828434e+000	65	40	6.925324e+000	0	0	0	0	0	0	5.26286	1	0	49.1849	41.037
DATA	1159	14	54	0	0	A_64_P053297	NM_001107278	11244.6	279.9	1.016905e+003	1.017285e+002	977	38.5	1.165166e+001	0	0	0	0	0	0	905.892	1	1	47.8731	40.2353
DATA	1160	14	55	0	0	A_64_P062986	NM_001001018	11270.4	279.573	1.378509e+001	3.115778e+000	74	39.5	8.018167e+000	0	0	0	0	0	0	12.2183	1	0	57.5363	39.0714
DATA	1161	14	56	0	0	A_44_P529226	NM_023091	11295.5	280	2.818173e+000	2.807718e+000	60	39	8.580280e+000	0	0	0	0	0	0	-1.69285	0	0	54.1152	40.0606
DATA	1162	14	57	0	0	A_42_P559737	NM_020074	11321	279.716	1.029349e+003	1.029736e+002	962	38	8.958530e+000	0	0	0	0	0	0	903.445	1	1	46.1809	40.4595
DATA	1163	14	58	0	0	A_44_P1017458	NM_199402	11346.3	279.667	8.255899e+001	8.729327e+000	135	40.5	8.482641e+000	0	0	0	0	0	0	72.1051	1	1	46.8651	41.8684
DATA	1164	14	59	0	0	A_44_P407750	NM_001127680	11371.9	279.935	5.268446e+002	5.276146e+001	529	41	9.182335e+000	0	0	0	0	0	0	457.891	1	1	54.4085	39.6207
DATA	1165	14	60	0	0	A_64_P033872	NM_001037353	11397.5	280	1.150330e+001	3.085933e+000	71	40	8.460294e+000	0	0	0	0	0	0	9.94918	1	0	54.1152	40.0811
DATA	1166	14	61	0	0	A_42_P472699	NM_001108061	11422.6	280.134	3.083026e+001	4.216887e+000	88.5	38	7.235064e+000	0	0	0	0	0	0	26.5401	1	1	46.1809	38.8846
DATA	1167	14	62	0	0	A_44_P201215	ENSRNOT00000014231	11448.4	280.154	1.978653e+001	3.503054e+000	77.5	41	9.256245e+000	0	0	0	0	0	0	16.9522	1	1	44.7812	42.2963
DATA	1168	14	63	0	0	A_64_P129910	NM_001107648	11473.2	279.912	1.928355e+002	1.950095e+001	227	38	8.138729e+000	0	0	0	0	0	0	164.473	1	1	46.5243	39.1034
DATA	1169	14	64	0	0	A_64_P027927	NM_022255	11498.4	280.028	7.538128e+001	8.082680e+000	125.5	37.5	7.059835e+000	0	0	0	0	0	0	64.0113	1	1	48.2044	37.7143
DATA	1170	14	65	0	0	A_64_P101623	A_64_P101623	11524.5	280	1.623667e+004	1.623669e+003	13714.5	42	1.163174e+001	0	0	0	0	0	0	13727	1	1	54.1152	41.2121
DATA	1171	14	66	0	0	A_42_P645110	NM_001029919	11549.2	279.884	1.489782e+004	1.489785e+003	12205	40	6.344345e+000	0	0	0	0	0	0	12544.4	1	1	46.5243	40.4074
DATA	1172	14	67	0	0	A_64_P017781	NM_001010956	11575	279.831	7.185707e+001	7.768849e+000	122	40	9.044242e+000	0	0	0	0	0	0	60.2644	1	1	45.835	41.7143
DATA	1173	14	68	0	0	A_64_P057106	NM_001004087	11600.5	280.352	9.395191e+001	9.851583e+000	140	38	8.344367e+000	0	0	0	0	0	0	78.5096	1	1	57.5363	39.087
DATA	1174	14	69	0	0	A_44_P187005	NM_022238	11625.6	280.427	4.060055e+001	5.032705e+000	95	41	9.795342e+000	0	0	0	0	0	0	33.812	1	1	57.5363	42.5556
DATA	1175	14	70	0	0	A_42_P779933	NM_017117	11651.4	280.323	1.826295e+001	3.498187e+000	75	37	8.281211e+000	0	0	0	0	0	0	15.1598	1	1	45.4864	38.4615
DATA	1176	14	71	0	0	A_42_P555701	NM_001107554	11676.4	279.735	3.930279e+003	3.930393e+002	3240	41	8.457053e+000	0	0	0	1	0	0	3252.84	1	1	46.5243	40.3913
DATA	1177	14	72	0	0	A_42_P705302	NM_001107361	11701.7	279.884	3.551934e+003	3.552060e+002	3020.5	41	7.289694e+000	0	0	0	1	0	0	2932.22	1	1	46.1809	40.1622
DATA	1178	14	73	0	0	A_64_P015435	A_64_P015435	11727.1	279.672	1.420711e+004	1.420714e+003	11642	42	1.027759e+001	0	0	0	0	0	0	11701.7	1	1	45.1352	42.9487
DATA	1179	14	74	0	0	A_64_P036217	NM_001000569	11752.6	280.427	3.972205e+001	4.985114e+000	91.5	43	7.427427e+000	0	0	0	0	0	0	32.6604	1	1	57.5363	41.6667
DATA	1180	14	75	0	0	A_44_P543511	NM_001024749	11777.9	279.738	1.529813e+003	1.530110e+002	1385	40	8.416942e+000	0	0	0	0	0	0	1255.86	1	1	44.7812	41.9412
DATA	1181	14	76	0	0	A_42_P759043	NM_001134509	11803.2	280.122	2.845925e+002	2.861902e+001	294	42	9.574755e+000	0	0	0	0	0	0	233.403	1	1	48.2044	42.25
DATA	1182	14	77	0	0	A_42_P679982	NM_001107835	11828.5	280.151	2.185848e+003	2.186057e+002	1886	38	7.290187e+000	0	0	0	0	0	0	1791.65	1	1	47.8731	39.0357
DATA	1183	14	78	0	0	A_43_P18064	NM_001106904	11854.4	280.319	1.157551e+001	3.235875e+000	69.5	44	7.933705e+000	0	0	0	0	0	0	9.48738	1	0	48.5334	42.4333
DATA	1184	14	79	0	0	A_64_P092143	NM_001129879	11879.5	280.37	1.392880e+003	1.393208e+002	1168	34	1.125093e+001	0	0	0	0	0	0	1142.11	1	1	48.5334	38.2
DATA	1185	14	80	0	0	A_64_P102886	A_64_P102886	11905.3	280.5	8.529454e+000	3.135618e+000	66.5	37	1.124640e+001	0	0	0	0	0	0	7.00093	1	0	57.5363	39.1923
DATA	1186	14	81	66	1	DarkCorner	DarkCorner	11930.5	280.5	3.023951e+000	3.012732e+000	61	37	7.026405e+000	0	0	0	0	0	0	-0.120521	0	0	57.5363	37.5
DATA	1187	14	82	66	1	DarkCorner	DarkCorner	11956.3	280.773	3.017155e+000	3.005995e+000	59	40	1.154365e+001	0	0	0	0	0	0	0.117386	0	0	52.3208	42.3235
DATA	1188	14	83	66	1	DarkCorner	DarkCorner	11980.8	280.169	3.009345e+000	2.998180e+000	56.5	39	7.786327e+000	0	0	0	0	0	0	-3.25026	0	0	45.835	40.2424
DATA	1189	14	84	66	1	DarkCorner	DarkCorner	12006.9	280.514	2.998396e+000	2.987272e+000	59	36	5.527993e+000	0	0	0	0	0	0	-0.262727	0	0	48.5334	37.6061
DATA	1190	14	85	66	1	DarkCorner	DarkCorner	12032	280.573	2.985940e+000	2.974862e+000	56.5	35	7.711724e+000	0	0	0	0	0	0	-2.95892	0	0	49.1849	34.992
DATA	1191	15	1	66	1	DarkCorner	DarkCorner	9886.09	285.594	2.733569e+000	2.723427e+000	60.5	36	8.688387e+000	0	0	0	0	0	0	-1.50952	0	0	46.1809	36.2949
DATA	1192	15	2	66	1	DarkCorner	DarkCorner	9911.01	286.068	2.723167e+000	2.713064e+000	57	39	6.744684e+000	0	0	0	0	0	0	-5.45322	0	0	46.8651	37.4571
DATA	1193	15	3	66	1	DarkCorner	DarkCorner	9936.02	285.962	2.713066e+000	2.703001e+000	55.5	40	8.674324e+000	0	0	0	0	0	0	-6.05849	0	0	48.8603	39.6098
DATA	1194	15	4	66	1	DarkCorner	DarkCorner	9962.91	286.092	2.702235e+000	2.692210e+000	59	40	7.605548e+000	0	0	0	0	0	0	-4.44824	0	0	51.4001	39.2381
DATA	1195	15	5	66	1	DarkCorner	DarkCorner	9988	286	2.692378e+000	2.682390e+000	57	41	7.555798e+000	0	0	0	0	0	0	-3.88058	0	0	65	40.5135
DATA	1196	15	6	0	0	A_44_P451392	NM_001108023	10013.2	286.116	1.947400e+002	1.965655e+001	238	44	8.096270e+000	0	0	0	0	0	0	180.46	1	1	46.5243	43.4571
DATA	1197	15	7	0	0	A_64_P012661	ENSRNOT00000010298	10038.4	286.13	6.091338e+002	6.097157e+001	627.5	38	1.027894e+001	0	0	0	0	0	0	566.47	1	1	46.8651	38.36
DATA	1198	15	8	0	0	A_42_P546058	NM_053670	10063.8	286.097	1.175422e+003	1.175721e+002	1071.5	38.5	9.030108e+000	0	0	0	0	0	0	1096.92	1	1	46.8651	41
DATA	1199	15	9	0	0	A_42_P695401	NM_031530	10089.3	285.9	2.411804e+002	2.426264e+001	286	44.5	1.110266e+001	0	0	0	0	0	0	225.833	1	1	47.2035	43.9412
DATA	1200	15	10	0	0	A_44_P192193	A_44_P192193	10114.9	286.065	8.930678e+001	9.311632e+000	146	39.5	1.016310e+001	0	0	0	0	0	0	83.902	1	1	65	40.7667
DATA	1201	15	11	0	0	A_42_P473886	NM_001165922	10140.3	285.859	1.723708e+002	1.743626e+001	224	40	7.716946e+000	0	0	0	0	0	0	162.444	1	1	45.4864	40.4857
DATA	1202	15	12	0	0	A_42_P576953	NM_138882	10165.5	285.794	3.140949e+002	3.151859e+001	364	39.5	6.890297e+000	0	0	0	1	0	0	296.89	1	1	46.5243	40.9286
DATA	1203	15	13	0	0	A_44_P260227	ENSRNOT00000036745	10191.4	286.404	3.001326e+001	3.978987e+000	90	39	6.770032e+000	0	0	0	0	0	0	28.4542	1	1	65	38
DATA	1204	15	14	0	0	A_44_P276435	NM_053853	10216.5	286.352	6.542512e+001	7.042199e+000	126.5	40	8.140434e+000	0	0	0	0	0	0	62.1921	1	1	57.5363	39
DATA	1205	15	15	0	0	A_43_P19066	NM_001017494	10241.9	286.386	1.076706e+002	1.107625e+001	160	38	9.414387e+000	0	0	0	0	0	0	102.61	1	1	57.259	39.4545
DATA	1206	15	16	0	0	A_64_P113200	ENSRNOT00000061930	10267.4	286.427	1.585989e+001	3.039270e+000	77	37	8.225905e+000	0	0	0	0	0	0	15.1503	1	1	57.5363	38.7
DATA	1207	15	17	0	0	A_42_P480108	NM_001007637	10292.4	285.738	5.065163e+002	5.071767e+001	554	38.5	9.439219e+000	0	0	0	0	0	0	484.851	1	1	45.835	39.0667
DATA	1209	15	19	0	0	A_44_P420046	NM_021669	10343.3	286.108	4.841842e+001	5.485149e+000	107.5	38	7.753182e+000	0	0	0	0	0	0	46.5242	1	1	45.835	37.3871
DATA	1210	15	20	0	0	A_64_P077021	A_64_P077021	10368.7	286.5	1.992483e+001	3.254520e+000	82.5	37.5	7.074983e+000	0	0	0	0	0	0	19.1764	1	1	57.5363	38.8462
DATA	1211	15	21	0	0	A_44_P292558	NM_213559	10394.4	286.427	1.493512e+002	1.515459e+001	207	40	7.381899e+000	0	0	0	0	0	0	143.939	1	1	57.5363	39.4857
DATA	1212	15	22	0	0	A_42_P471653	NM_001031654	10419.7	286.726	1.159701e+001	2.816596e+000	71.5	39	7.164428e+000	0	0	0	0	0	0	11.1898	1	0	44.4243	38.0645
DATA	1213	15	23	0	0	A_43_P12000	NM_019272	10444.9	286.558	5.782785e+002	5.788468e+001	620	38	7.040257e+000	0	0	0	0	0	0	558.477	1	1	50.1463	38.7391
DATA	1214	15	24	0	0	A_64_P131395	NM_001037523	10469.8	286.257	4.123640e+000	2.595746e+000	67	38	8.318244e+000	0	0	0	0	0	0	3.98505	1	0	46.5243	38.5455
DATA	1215	15	25	0	0	A_42_P682853	NM_017193	10495.8	285.703	1.424417e+002	1.447269e+001	196	41.5	9.092184e+000	0	0	0	0	0	0	137.712	1	1	45.1352	41.7667
DATA	1216	15	26	0	0	A_42_P647505	TC640289	10521.1	286.389	1.222509e+003	1.222777e+002	1223.5	37	6.172563e+000	0	0	0	0	0	0	1182.29	1	1	48.2044	35.7857
DATA	1217	15	27	0	0	A_44_P682959	NM_001025139	10546.5	286.5	5.066285e+000	2.610475e+000	66	39	8.409160e+000	0	0	0	0	0	0	4.89973	1	0	57.5363	39.2258
DATA	1218	15	28	0	0	A_64_P249426	NM_001014271	10572.1	286.5	1.761309e+001	3.108559e+000	76	37	1.050038e+001	0	0	0	0	0	0	17.0301	1	1	56.9804	38.5161
DATA	1219	15	29	0	0	A_64_P133430	NM_001044282	10597.1	286.425	1.065662e+004	1.065665e+003	9927	39.5	7.299706e+000	0	0	0	0	0	0	10299.1	1	1	48.2044	40.7857
DATA	1220	15	30	0	0	A_42_P635611	NM_001025685	10622.7	286.5	2.573949e+000	2.564399e+000	62	39.5	8.607668e+000	0	0	0	0	0	0	-0.772409	0	0	57.5363	40.3333
DATA	1221	15	31	0	0	A_42_P592013	NM_001127600	10647.8	286.639	1.085879e+003	1.086182e+002	1085	42	8.088066e+000	0	0	0	0	0	0	1047.77	1	1	47.8731	41.6286
DATA	1222	15	32	0	1	ETG02_36680	ETG02_36680	10674.1	286.803	5.143903e+000	2.620764e+000	68	43	9.795156e+000	0	0	0	0	0	0	4.95747	1	0	46.8651	41.5152
DATA	1223	15	33	0	0	A_42_P608478	NM_001025131	10699	286.545	1.660769e+001	3.062775e+000	79	42	8.756700e+000	0	0	0	0	0	0	15.9832	1	1	65	40.5862
DATA	1224	15	34	0	0	A_44_P137397	NM_017236	10724.4	286.573	6.077462e+004	6.077463e+003	59021.5	38	1.123928e+001	0	0	0	0	0	0	58394.2	1	1	57.5363	40.1071
DATA	1226	15	36	0	0	A_64_P110789	A_64_P110789	10775.2	286.933	1.143938e+001	2.829274e+000	74	39	6.783093e+000	0	0	0	0	0	0	10.9485	1	0	48.5334	38.7
DATA	1227	15	37	0	0	A_64_P061562	A_64_P061562	10800.2	286.603	1.153433e+003	1.153725e+002	1086	38.5	6.548390e+000	0	0	0	0	0	0	1101.39	1	1	50.1463	39.125
DATA	1228	15	38	0	0	A_44_P511359	NM_001108736	10825.6	286.653	2.888356e+002	2.900036e+001	345	39.5	5.611190e+000	0	0	0	0	0	0	275.112	1	1	48.2044	41.1786
DATA	1229	15	39	0	0	A_42_P658220	NM_001109598	10851	286.809	9.529438e+002	9.533004e+001	984	41	8.478312e+000	0	0	0	0	0	0	905.207	1	1	46.8651	41.8966
DATA	1230	15	40	0	0	A_42_P479096	NM_001008293	10876.3	286.845	4.545363e+002	4.552878e+001	491.5	42	5.157629e+000	0	0	0	0	0	0	430.51	1	1	47.5395	41.2963
DATA	1231	15	41	0	0	A_64_P275280	NM_001109569	10901.9	286.534	3.343837e+003	3.343940e+002	3252	41	8.391938e+000	0	0	0	0	0	0	3156.95	1	1	48.5334	40.7692
DATA	1232	15	42	0	0	A_42_P785926	NM_001108289	10927.2	286.621	5.720155e+002	5.726207e+001	596.5	40.5	9.650249e+000	0	0	0	0	0	0	538.266	1	1	52.3208	40.8158
DATA	1233	15	43	0	0	A_64_P005238	A_64_P005238	10952.9	286.614	3.342001e+001	4.259739e+000	93	38	5.062301e+000	0	0	0	0	0	0	31.3368	1	1	57.259	37.4242
DATA	1234	15	44	0	0	A_42_P555753	NM_001106401	10978.1	286.896	1.862003e+003	1.862191e+002	1766	40.5	1.043393e+001	0	0	0	0	0	0	1739.64	1	1	46.8651	40.6875
DATA	1235	15	45	0	0	A_42_P469751	XM_001054007	11003.5	286.929	1.287208e+002	1.314427e+001	181	36.5	7.427289e+000	0	0	0	0	0	0	119.799	1	1	47.8731	37.2692
DATA	1236	15	46	0	0	A_44_P506124	XM_222590	11029.1	286.896	1.558991e+003	1.559220e+002	1538	40	9.755671e+000	0	0	0	0	0	0	1445.09	1	1	46.8651	41.3429
DATA	1237	15	47	0	0	A_44_P441947	XM_001079870	11054.4	286.894	6.332580e+002	6.338261e+001	650	38	9.723535e+000	0	0	0	0	0	0	584.564	1	1	45.4864	40.0667
DATA	1238	15	48	0	0	A_64_P127659	NM_001106228	11079.7	286.9	2.047493e+003	2.047670e+002	1939.5	41	8.499425e+000	0	0	0	0	0	0	1882.01	1	1	47.2035	43.0333
DATA	1239	15	49	0	0	A_42_P733076	NM_001033867	11105.2	286.868	2.023660e+002	2.041677e+001	244.5	40	9.064671e+000	0	0	0	0	0	0	185.187	1	1	46.1809	40.9444
DATA	1240	15	50	0	0	A_64_P145939	NM_001109499	11130.5	287	4.178065e+001	4.984667e+000	103	41	6.808463e+000	0	0	0	0	0	0	38.0626	1	1	54.1152	40.3
DATA	1241	15	51	0	0	A_44_P1040796	NM_001106660	11156.1	286.896	6.608498e+003	6.608554e+002	5948	42	8.092619e+000	0	0	0	0	0	0	5992.32	1	1	46.8651	43.2381
DATA	1242	15	52	0	0	A_42_P588072	NM_001106829	11181.5	287	4.303544e+001	5.104026e+000	98.5	42	6.572077e+000	0	0	0	0	0	0	38.8397	1	1	44.4243	43.5946
DATA	1243	15	53	0	0	A_64_P045823	ENSRNOT00000023172	11206.6	287.069	1.164808e+002	1.196995e+001	170	38	7.800375e+000	0	0	0	0	0	0	104.63	1	1	53.8203	38.1304
DATA	1244	15	54	0	0	A_42_P591344	NM_001037780	11232.5	287	1.139638e+002	1.172839e+001	161.5	36	7.096836e+000	0	0	0	0	0	0	101.863	1	1	54.1152	36.0714
DATA	1245	15	55	0	0	A_64_P120322	A_64_P120322	11257.3	287.188	2.794422e+000	2.787867e+000	65	38	7.271737e+000	0	0	0	0	0	0	1.29666	0	0	46.8651	38.5333
DATA	1246	15	56	0	0	A_64_P062665	NM_001170470	11282.7	287.101	1.878481e+002	1.899202e+001	222	39	7.782556e+000	0	0	0	0	0	0	166.288	1	1	46.5243	38.5455
DATA	1247	15	57	0	0	A_44_P398300	NM_001005538	11308.1	286.672	1.008501e+003	1.008893e+002	926.5	40	8.573096e+000	0	0	0	0	0	0	888.301	1	1	45.1352	40.2308
DATA	1248	15	58	0	0	A_64_P001545	ENSRNOT00000029141	11333.6	287.427	2.328646e+004	2.328648e+003	20217	39	8.588314e+000	0	0	0	0	0	0	20412.3	1	1	57.5363	40.3226
DATA	1249	15	59	0	0	A_44_P1010653	NM_001109021	11359.2	286.803	2.012035e+003	2.012235e+002	1749	41	9.965210e+000	0	0	0	0	0	0	1754.85	1	1	45.835	42.3448
DATA	1250	15	60	0	0	A_44_P398969	NM_001013225	11384.2	286.921	3.593945e+002	3.605253e+001	371	41	9.366148e+000	0	0	0	0	0	0	311.963	1	1	45.4864	41.4839
DATA	1251	15	61	0	0	A_64_P059495	NM_001109986	11410	287	2.670600e+003	2.670754e+002	2388	39.5	7.299305e+000	0	0	0	0	0	0	2306.91	1	1	46.8651	39.4118
DATA	1252	15	62	0	0	A_64_P037040	A_64_P037040	11435.5	287.147	1.994024e+002	2.014725e+001	228.5	40	9.645438e+000	0	0	0	0	0	0	171.436	1	1	49.8279	41.9655
DATA	1253	15	63	0	0	A_64_P051446	NM_001142942	11460.6	287.392	4.128554e+003	4.128656e+002	3551	42	8.442446e+000	0	0	0	0	0	0	3533.53	1	1	49.1849	43.3182
DATA	1254	15	64	0	0	A_42_P701756	NM_001107646	11486.1	287.3	1.042539e+003	1.042944e+002	958	38	1.059747e+001	0	0	0	0	0	0	888.251	1	1	46.8651	41.375
DATA	1255	15	65	0	0	A_44_P172604	NM_031795	11511.2	286.677	1.974395e+003	1.974611e+002	1649.5	41	9.090246e+000	0	0	0	0	0	0	1674.79	1	1	45.4864	39.8485
DATA	1256	15	66	0	0	A_64_P152000	A_64_P152000	11536.9	287.477	2.942695e+000	2.944825e+000	63	42.5	8.760488e+000	0	0	0	0	0	0	2.33917	0	0	55.8519	41.1154
DATA	1257	15	67	0	0	A_44_P339008	NM_001024975	11561.9	286.969	4.503121e+002	4.512732e+001	447	40	8.837978e+000	0	0	0	0	0	0	378.874	1	1	46.8651	41.7879
DATA	1258	15	68	0	0	A_44_P560070	A_44_P560070	11587.6	287.427	2.965739e+000	2.959548e+000	64	38	9.818802e+000	0	0	0	0	0	0	1.41415	0	0	57.5363	40.1379
DATA	1259	15	69	0	0	A_44_P520509	NM_001033868	11613	287.139	3.852628e+003	3.852742e+002	3180	42.5	1.066122e+001	0	0	0	0	0	0	3217.59	1	1	46.8651	43.3077
DATA	1260	15	70	0	0	A_42_P643349	NM_001109495	11638.5	287.129	3.410917e+001	4.526266e+000	89	40	7.914054e+000	0	0	0	0	0	0	28.3921	1	1	47.5395	40.0323
DATA	1261	15	71	0	0	A_44_P215075	NM_012667	11663.7	287.394	1.528475e+002	1.557335e+001	191	39.5	7.843464e+000	0	0	0	0	0	0	126.85	1	1	47.5395	38.7083
DATA	1262	15	72	0	0	A_44_P560363	ENSRNOT00000049736	11689	287.629	1.556509e+003	1.556797e+002	1352	38	6.176429e+000	0	0	0	0	0	0	1288.31	1	1	44.0646	39.3
DATA	1263	15	73	0	0	A_44_P553158	NM_001014014	11714.3	287.313	8.824922e+002	8.830018e+001	780	42	8.554278e+000	0	0	0	0	0	0	728.648	1	1	46.1809	41.5
DATA	1264	15	74	0	0	A_64_P165277	NM_001106370	11740.1	287.5	3.016894e+000	3.007939e+000	61.5	43	8.282662e+000	0	0	0	0	0	0	0.955821	0	0	65	41.9412
DATA	1265	15	75	0	0	A_64_P138187	A_64_P138187	11765.5	287.5	9.862791e+002	9.867385e+001	886	41.5	8.708311e+000	0	0	0	0	0	0	811.336	1	1	49.1849	41.6875
DATA	1266	15	76	0	0	A_44_P429041	XM_227654	11790.7	287.652	2.201236e+002	2.221779e+001	245.5	43	8.853144e+000	0	0	0	0	0	0	180.861	1	1	45.835	44.3667
DATA	1267	15	77	0	0	A_44_P465880	NM_199389	11815.9	287.464	1.378868e+003	1.379198e+002	1185	42.5	9.555404e+000	0	0	0	0	0	0	1131.98	1	1	47.5395	40.9333
DATA	1268	15	78	0	0	A_44_P381740	NM_001000239	11841.4	287.857	1.789827e+001	3.508477e+000	73	43	8.594042e+000	0	0	0	0	0	0	14.6897	1	1	47.5395	41.3704
DATA	1269	15	79	0	0	A_64_P045211	NM_001191733	11867	287.545	2.124415e+001	3.690120e+000	76.5	42	9.103987e+000	0	0	0	0	0	0	17.4378	1	1	55.8519	41.8485
DATA	1270	15	80	0	0	A_64_P010896	A_64_P010896	11892.4	287.573	1.017979e+001	3.182328e+000	69	41	1.223499e+001	0	0	0	0	0	0	8.36179	1	0	57.5363	40.8485
DATA	1271	15	81	0	0	A_42_P566906	NM_001006966	11917.6	287.36	1.381786e+003	1.382114e+002	1205	44	8.840707e+000	0	0	0	0	0	0	1136.39	1	1	48.8603	43.6087
DATA	1272	15	82	66	1	DarkCorner	DarkCorner	11943.4	287.573	3.016844e+000	3.005651e+000	57	40.5	1.022000e+001	0	0	0	0	0	0	-0.575718	0	0	57.5363	42.3214
DATA	1273	15	83	66	1	DarkCorner	DarkCorner	11968.6	287.573	7.052498e+000	3.080077e+000	64	40	1.091947e+001	0	0	0	0	0	0	5.82559	1	0	57.5363	42.2121
DATA	1274	15	84	66	1	DarkCorner	DarkCorner	11994	287.545	2.999973e+000	2.988843e+000	57	40	7.634775e+000	0	0	0	0	0	0	-1.48039	0	0	55.8519	40.6486
DATA	1275	15	85	66	1	DarkCorner	DarkCorner	12018.9	287.525	2.988765e+000	2.977677e+000	57.5	36	7.712992e+000	0	0	0	0	0	0	-1.83388	0	0	50.4627	36.9024
DATA	1276	16	1	66	1	DarkCorner	DarkCorner	9899.45	293.047	2.724773e+000	2.714664e+000	56	37	8.218550e+000	0	0	0	0	0	0	-5.72314	0	0	51.0895	37.9706
DATA	1277	16	2	66	1	DarkCorner	DarkCorner	9923.99	293.606	2.714626e+000	2.704555e+000	58.5	40.5	9.333503e+000	0	0	0	0	0	0	-2.67353	0	0	47.8731	39.1667
DATA	1278	16	3	66	1	DarkCorner	DarkCorner	9949.42	293.25	2.704611e+000	2.694577e+000	57	40	9.299614e+000	0	0	0	0	0	0	-3.98013	0	0	42.9674	38.2889
DATA	1279	16	4	66	1	DarkCorner	DarkCorner	9975.42	293.427	2.694284e+000	2.684288e+000	59.5	40	8.076915e+000	0	0	0	0	0	0	-4.34284	0	0	57.5363	39.3548
DATA	1280	16	5	0	0	A_42_P708614	NM_001130505	10000.6	293.427	1.817318e+004	1.817320e+003	16764	42	7.925907e+000	0	0	0	0	0	0	16828.3	1	1	51.0895	41.5
DATA	1281	16	6	0	0	A_44_P427177	NM_053923	10026.3	293.708	2.674695e+000	2.664772e+000	61	42	8.304271e+000	0	0	0	0	0	0	-1.86583	0	0	39.0882	40.9333
DATA	1282	16	7	0	0	A_44_P417051	NM_001024886	10051.5	293.5	3.888277e+001	4.708587e+000	97	40	1.166950e+001	0	0	0	0	0	0	36.2629	1	1	57.5363	39.9655
DATA	1283	16	8	0	0	A_64_P052917	ENSRNOT00000029053	10076.7	293.5	3.152090e+001	4.115844e+000	91	39.5	9.942533e+000	0	0	0	0	0	0	29.4968	1	1	57.5363	42.0556
DATA	1284	16	9	0	0	A_42_P689013	NM_053800	10102	293.271	7.097103e+003	7.097152e+002	6619	43	7.921744e+000	0	0	0	0	0	0	6663.12	1	1	46.8651	41.7333
DATA	1285	16	10	0	0	A_42_P668072	NM_013130	10127.5	293.5	1.554083e+002	1.576170e+001	210	40	1.426224e+001	0	0	0	0	0	0	146.378	1	1	57.5363	43.8214
DATA	1286	16	11	0	0	A_44_P762596	XM_237156	10152.8	293.529	1.000555e+002	1.034325e+001	152	38	8.058516e+000	0	0	0	0	0	0	94.5299	1	1	47.5395	39.4444
DATA	1287	16	12	0	0	A_44_P673662	TC577636	10178.4	293.119	4.485080e+001	5.191161e+000	105	38	8.563488e+000	0	0	0	0	0	0	42.4966	1	1	46.1809	38.1111
DATA	1288	16	13	0	0	A_42_P674598	NM_013067	10203.7	293.5	1.829803e+004	1.829805e+003	17067	40	8.808737e+000	0	0	0	0	0	0	17386.1	1	1	57.5363	38.9231
DATA	1289	16	14	0	0	A_44_P529994	NM_001191720	10229.4	293.565	8.585493e+000	2.737767e+000	74	39.5	7.672255e+000	0	0	0	0	0	0	8.17923	1	0	47.5395	38.7778
DATA	1290	16	15	0	0	A_42_P655644	NM_133618	10254.1	293.986	7.339039e+002	7.343620e+001	767	38.5	8.418926e+000	0	0	0	0	0	0	700.865	1	1	46.8651	39.2857
DATA	1291	16	16	0	0	A_42_P589674	NM_001044225	10279.6	293.8	2.379046e+003	2.379187e+002	2305	38	8.458132e+000	0	0	0	0	0	0	2277.05	1	1	45.4864	39.96
DATA	1292	16	17	0	0	A_64_P010139	A_64_P010139	10305.4	293.573	1.472030e+002	1.494507e+001	202	38	8.847643e+000	0	0	0	0	0	0	141.185	1	1	57.5363	37.931
DATA	1293	16	18	0	0	A_42_P586883	NM_001106416	10330.6	293.573	2.346874e+001	3.485828e+000	82	38	8.946075e+000	0	0	0	0	0	0	22.551	1	1	57.5363	37.0323
DATA	1294	16	19	0	0	A_42_P461144	DV724416	10356.4	293.573	7.119775e+002	7.124423e+001	760	36.5	8.436356e+000	0	0	0	0	0	0	685.299	1	1	57.5363	37.9583
DATA	1295	16	20	0	0	A_64_P130565	NM_031668	10381.5	293.543	8.246784e+001	8.637770e+000	140	37	6.476343e+000	0	0	0	0	0	0	79.492	1	1	47.2035	38.5926
DATA	1296	16	21	0	0	A_64_P002826	NM_001134527	10407	293.545	1.031854e+002	1.063284e+001	164	40	7.256987e+000	0	0	0	0	0	0	99.5867	1	1	55.8519	38.4286
DATA	1298	16	23	0	0	A_64_P036099	A_64_P036099	10457.5	293.853	1.306701e+003	1.306952e+002	1323	39	8.372006e+000	0	0	0	0	0	0	1263.48	1	1	49.8279	40.2381
DATA	1299	16	24	0	0	A_64_P080580	ENSRNOT00000040473	10482.8	293.942	3.444086e+002	3.453586e+001	397	38.5	7.423286e+000	0	0	0	0	0	0	333.215	1	1	46.5243	38.5294
DATA	1300	16	25	0	0	A_43_P12276	NM_022636	10508.5	293.648	3.341885e+001	4.209126e+000	93	39.5	9.549689e+000	0	0	0	0	0	0	32.3433	1	1	57.5363	40.1
DATA	1301	16	26	0	0	A_42_P505393	NM_199085	10533.8	293.765	3.911118e+002	3.919478e+001	435.5	38	7.482934e+000	0	0	0	0	0	0	378.575	1	1	46.1809	38.0741
DATA	1302	16	27	0	0	A_44_P883619	ENSRNOT00000032374	10559.4	293.8	2.568471e+000	2.564215e+000	63	39	8.358438e+000	0	0	0	0	0	0	1.59068	0	0	41.8414	39.7222
DATA	1303	16	28	0	0	A_44_P493894	ENSRNOT00000050156	10584.5	294	1.875584e+005	1.875584e+004	181766	41	7.115011e+000	0	0	0	0	0	0	181469	1	1	54.1152	39.3636
DATA	1304	16	29	0	0	A_64_P085334	TC585414	10609.5	293.905	3.551227e+003	3.551319e+002	3357	43	8.807048e+000	0	0	0	0	0	0	3433.94	1	1	48.5334	43.4444
DATA	1306	16	31	0	0	A_64_P045433	A_64_P045433	10660.7	294.106	2.099148e+003	2.099305e+002	2084	40.5	8.839074e+000	0	0	0	0	0	0	2026.07	1	1	45.835	41.1471
DATA	1307	16	32	0	0	A_64_P025351	AY724474	10686.5	294	2.148353e+004	2.148355e+003	20705	36	8.100508e+000	0	0	0	0	0	0	20708.4	1	1	54.1152	37.7586
DATA	1308	16	33	0	0	A_44_P501626	ENSRNOT00000050744	10711.6	293.848	1.286492e+001	2.876913e+000	74.5	36	9.259797e+000	0	0	0	0	0	0	12.382	1	0	46.1809	38.6207
DATA	1309	16	34	0	0	A_64_P071525	NM_001000141	10737	294	2.587284e+000	2.582151e+000	62	37	1.113508e+001	0	0	0	0	0	0	1.45855	0	0	65	39.64
DATA	1310	16	35	0	0	A_64_P006545	A_64_P006545	10762.1	293.814	6.544360e+003	6.544411e+002	6347	40.5	5.911318e+000	0	0	0	0	0	0	6275.52	1	1	46.8651	41.4333
DATA	1311	16	36	0	0	A_64_P089561	NM_001044265	10787.6	293.747	5.268076e+001	5.869642e+000	114	38	6.656922e+000	0	0	0	0	0	0	50.4054	1	1	48.5334	38.5588
DATA	1312	16	37	0	0	A_44_P791108	NM_001014070	10813.8	293.635	2.291388e+001	3.461812e+000	85	39	7.048511e+000	0	0	0	0	0	0	21.8694	1	1	47.8731	40.2821
DATA	1313	16	38	0	0	A_44_P161535	A_44_P161535	10838.6	293.851	2.660346e+003	2.660473e+002	2612.5	41	6.970839e+000	0	0	0	0	0	0	2532.66	1	1	46.1809	39.8519
DATA	1314	16	39	0	0	A_44_P299136	NM_001108539	10864.1	294.386	1.414912e+002	1.438760e+001	197.5	40	8.432477e+000	0	0	0	0	0	0	134.327	1	1	57.259	41.76
DATA	1315	16	40	1028	1	(+)E1A_r60_a97	E1A_r60_a97	10889.5	294.352	2.626402e+000	2.616658e+000	61	42	8.538060e+000	0	0	0	0	0	0	-1.85542	0	0	57.5363	40.5385
DATA	1316	16	41	0	0	A_44_P161723	NM_001134526	10914.6	294.427	6.588380e+001	7.092053e+000	121	39.5	9.105957e+000	0	0	0	0	0	0	62.1612	1	1	57.5363	42.0385
DATA	1317	16	42	0	0	A_64_P121443	A_64_P121443	10940.6	294.172	2.644050e+000	2.634240e+000	59	39	7.165199e+000	0	0	0	0	0	0	-2.1119	0	0	45.1352	40.2308
DATA	1318	16	43	0	0	A_42_P771373	NM_012614	10965.4	294	5.703246e+003	5.703308e+002	5224	39	6.626394e+000	0	0	0	1	0	0	5343.21	1	1	48.5334	39
DATA	1319	16	44	0	0	A_44_P1025944	NM_147140	10990.4	293.761	5.178513e+003	5.178581e+002	4955	36	8.586569e+000	0	0	0	0	0	0	4833.51	1	1	46.5243	38.3333
DATA	1320	16	45	0	0	A_64_P014085	NM_001007678	11016.1	294.104	4.600995e+002	4.608700e+001	484	38	6.732844e+000	0	0	0	0	0	0	427.77	1	1	46.8651	38.2581
DATA	1321	16	46	0	0	A_64_P095298	NM_001047963	11041.8	294.286	3.453183e+001	4.367937e+000	94	38	9.867973e+000	0	0	0	0	0	0	31.9741	1	1	45.1352	41.2424
DATA	1322	16	47	0	0	A_64_P122037	A_64_P122037	11067.1	294.243	9.274743e+003	9.274782e+002	8352	42	7.403126e+000	0	0	0	0	0	0	8551.76	1	1	46.5243	44.037
DATA	1323	16	48	0	0	A_64_P098094	A_64_P098094	11092.6	294.427	4.495334e+004	4.495335e+003	41602	40	1.072871e+001	0	0	0	0	0	0	41270.3	1	1	57.5363	42.4706
DATA	1324	16	49	0	0	A_44_P353708	ENSRNOT00000033510	11117.9	293.862	5.078074e+001	5.755900e+000	107	41	7.174348e+000	0	0	0	0	0	0	46.4099	1	1	45.835	40.6667
DATA	1325	16	50	0	0	A_42_P541669	ENSRNOT00000043345	11143.3	293.971	4.536443e+002	4.544603e+001	472	41	8.627862e+000	0	0	0	0	0	0	412.714	1	1	46.1809	41.24
DATA	1326	16	51	0	0	A_42_P560894	NM_019138	11168.4	293.899	2.022825e+003	2.023010e+002	1933	43.5	7.939878e+000	0	0	0	0	0	0	1831.83	1	1	47.5395	43.5417
DATA	1327	16	52	0	0	A_42_P498066	NM_031136	11194.3	294.5	4.156993e+004	4.156994e+003	35998	41.5	7.192044e+000	0	0	0	0	0	0	37466.8	1	1	57.5363	42.1765
DATA	1328	16	53	0	0	A_42_P538928	NM_053021	11219.3	294.465	7.923406e+003	7.923455e+002	7005	37	8.063991e+000	0	0	0	1	0	0	7107.64	1	1	47.8731	37.8065
DATA	1329	16	54	0	0	A_64_P302169	NM_001099493	11244.8	294.922	3.256462e+001	4.277933e+000	91	38	6.681394e+000	0	0	0	0	0	0	29.0719	1	1	45.835	37.7778
DATA	1330	16	55	0	0	A_43_P18282	NM_001173436	11270.4	294.573	5.925116e+001	6.548301e+000	114	38	7.751974e+000	0	0	0	0	0	0	52.6333	1	1	57.5363	36.9
DATA	1331	16	56	0	0	A_44_P304169	NM_001000482	11295.7	294.348	1.571289e+002	1.596074e+001	202	40	9.245667e+000	0	0	0	0	0	0	138.893	1	1	47.2035	39.4
DATA	1332	16	57	0	0	A_44_P318932	XM_231081	11320.7	294.343	2.525198e+003	2.525355e+002	2288.5	41	9.352476e+000	0	0	0	0	0	0	2221.36	1	1	47.5395	41.4706
DATA	1333	16	58	0	0	A_64_P124621	A_64_P124621	11346.3	294	1.490132e+002	1.516757e+001	194.5	37	9.790054e+000	0	0	0	0	0	0	130.432	1	1	45.4864	39.3871
DATA	1334	16	59	0	0	A_42_P553960	NM_001107831	11371.6	294.192	4.064368e+003	4.064468e+002	3547.5	43.5	9.708710e+000	0	0	0	0	0	0	3540.46	1	1	48.2044	42.7917
DATA	1335	16	60	0	0	A_64_P129459	A_64_P129459	11396.9	294.232	5.087102e+002	5.095117e+001	501.5	42	9.256846e+000	0	0	0	0	0	0	441.014	1	1	46.5243	41.2432
DATA	1336	16	61	0	0	A_64_P083224	ENSRNOT00000017383	11422.6	294.573	2.566797e+001	3.850660e+000	83.5	42.5	1.102612e+001	0	0	0	0	0	0	22.147	1	1	57.5363	43.1538
DATA	1337	16	62	0	0	A_64_P031840	NM_001017445	11448.1	294.361	6.509862e+002	6.516247e+001	617	40	9.972894e+000	0	0	0	0	0	0	559.046	1	1	48.2044	43.3
DATA	1338	16	63	0	0	A_43_P16427	NM_001191000	11472.9	294.443	3.906081e+001	4.862974e+000	94	38	1.036557e+001	0	0	0	0	0	0	33.3963	1	1	43.3362	41.4848
DATA	1339	16	64	0	0	A_64_P159034	NM_001191681	11498.6	294.611	1.187943e+004	1.187947e+003	9967	39	9.025443e+000	0	0	0	0	0	0	10111.6	1	1	48.2044	39.7
DATA	1340	16	65	0	0	A_64_P009007	A_64_P009007	11524.3	294.931	4.528811e+001	5.389706e+000	99	42	1.162933e+001	0	0	0	0	0	0	38.384	1	1	43.3362	41.7931
DATA	1341	16	66	0	0	A_42_P489817	NM_001107681	11549.3	294.652	1.785527e+003	1.785768e+002	1582	39	6.622101e+000	0	0	0	0	0	0	1507.18	1	1	45.835	40.931
DATA	1342	16	67	0	0	A_42_P643272	NM_053389	11575	294.545	8.995830e+002	9.000651e+001	819	39	8.096270e+000	0	0	0	0	0	0	756.342	1	1	55.8519	40.4571
DATA	1343	16	68	0	0	A_64_P076063	XM_001061753	11600.4	294.606	7.734439e+001	8.280256e+000	127	43.5	1.154983e+001	0	0	0	0	0	0	64.7904	1	1	45.1352	41.9615
DATA	1344	16	69	0	0	A_64_P047371	NM_001109423	11625.7	294.778	1.131610e+003	1.131999e+002	1021	43	9.979425e+000	0	0	0	0	0	0	944.723	1	1	47.5395	43.0435
DATA	1345	16	70	0	0	A_44_P991940	XM_225667	11651.4	294.573	5.669795e+001	6.403468e+000	109	39	8.227534e+000	0	0	0	0	0	0	47.1811	1	1	57.5363	39
DATA	1346	16	71	0	0	A_42_P667802	ENSRNOT00000014585	11676.5	294.812	7.704561e+001	8.262437e+000	124	40	7.531489e+000	0	0	0	0	0	0	63.9341	1	1	46.8651	40.84
DATA	1347	16	72	0	0	A_44_P433942	A_44_P433942	11702.2	294.838	2.682017e+001	4.018307e+000	82.5	37	7.376674e+000	0	0	0	0	0	0	22.1987	1	1	46.1809	38.8125
DATA	1348	16	73	0	0	A_42_P735279	NM_001004446	11727.2	294.785	1.125340e+004	1.125344e+003	9249.5	44	9.231588e+000	0	0	0	0	0	0	9293.95	1	1	45.835	43
DATA	1349	16	74	0	0	A_64_P000316	A_64_P000316	11752.8	294.794	7.041577e+001	7.655725e+000	118	40.5	8.480200e+000	0	0	0	0	0	0	58.0469	1	1	45.1352	40.5
DATA	1350	16	75	0	0	A_64_P073357	XM_001070426	11778.1	295.053	6.740277e+001	7.381247e+000	118.5	42	8.230549e+000	0	0	0	0	0	0	55.4859	1	1	42.9674	43.75
DATA	1351	16	76	0	0	A_42_P501972	NM_001025418	11803.1	294.896	1.827340e+002	1.851992e+001	215	44	9.894606e+000	0	0	0	1	0	0	150.272	1	1	46.8651	44.3548
DATA	1352	16	77	0	0	A_64_P030824	ENSRNOT00000002002	11828.7	295.03	7.052539e+001	7.669311e+000	118	39.5	9.357276e+000	0	0	0	0	0	0	57.9651	1	1	45.835	40.4
DATA	1353	16	78	0	0	A_42_P537715	NM_001025743	11854	295	9.207665e+002	9.212596e+001	803	42	8.716815e+000	0	0	0	0	0	0	756.718	1	1	46.8651	41.7813
DATA	1354	16	79	0	0	A_44_P596424	TC642059	11879.5	295	3.320433e+002	3.334068e+001	329.5	41	8.679478e+000	0	0	0	0	0	0	273.004	1	1	54.1152	40.4444
DATA	1355	16	80	0	0	A_42_P528891	XM_001074805	11905	294.889	1.080201e+002	1.121336e+001	147.5	40	8.562253e+000	0	0	0	0	0	0	88.8995	1	1	45.4864	41.1429
DATA	1356	16	81	0	0	A_64_P130516	A_64_P130516	11930.6	294.897	1.109543e+002	1.149505e+001	152	40.5	8.097123e+000	0	0	0	0	0	0	91.4585	1	1	46.5243	40.4583
DATA	1357	16	82	66	1	DarkCorner	DarkCorner	11955.9	295.065	3.009142e+000	2.999078e+000	60	37	1.015513e+001	0	0	0	0	0	0	0.670834	0	0	54.4085	39.28
DATA	1358	16	83	66	1	DarkCorner	DarkCorner	11981.8	295.111	3.000488e+000	2.989356e+000	56	37	8.667341e+000	0	0	0	0	0	0	-2.99244	0	0	47.8731	38.6667
DATA	1359	16	84	66	1	DarkCorner	DarkCorner	12006.1	294.898	2.990607e+000	2.979512e+000	60	38	8.236340e+000	0	0	0	0	0	0	-0.303219	0	0	38.6789	38.1389
DATA	1360	16	85	66	1	DarkCorner	DarkCorner	12032.1	295.386	2.977519e+000	2.966472e+000	61	35	8.264134e+000	0	0	0	0	0	0	-0.175604	0	0	57.259	35.0885
DATA	1361	17	1	66	1	DarkCorner	DarkCorner	9886.51	300.312	2.726741e+000	2.716624e+000	56	35	7.907524e+000	0	0	0	0	0	0	-5.55219	0	0	49.8279	35.3863
DATA	1362	17	2	66	1	DarkCorner	DarkCorner	9911.58	300.573	2.716572e+000	2.706493e+000	58	38	6.338344e+000	0	0	0	0	0	0	-3.62696	0	0	65	37.7857
DATA	1363	17	3	66	1	DarkCorner	DarkCorner	9937.33	300.5	2.706350e+000	2.696309e+000	58	42	9.278617e+000	0	0	0	0	0	0	-2.61899	0	0	57.5363	41.8125
DATA	1364	17	4	66	1	DarkCorner	DarkCorner	9963.22	300.389	2.696203e+000	2.686199e+000	57	38	6.836851e+000	0	0	0	0	0	0	-4.83108	0	0	47.8731	37.5263
DATA	1365	17	5	0	0	A_44_P434817	NM_001012187	9988	300.545	1.363503e+003	1.363766e+002	1265.5	42.5	6.305991e+000	0	0	0	0	0	0	1261.66	1	1	55.8519	41.6
DATA	1366	17	6	0	0	A_64_P153319	A_64_P153319	10013.1	300.884	3.605966e+002	3.615814e+001	390	42	8.910064e+000	0	0	0	0	0	0	334.872	1	1	46.8651	42.4516
DATA	1367	17	7	0	0	A_64_P034394	XM_218828	10038.6	300.716	1.884389e+001	3.257825e+000	78	44	7.439490e+000	0	0	0	0	0	0	17.5613	1	1	48.5334	41.9583
DATA	1368	17	8	0	0	A_64_P001399	A_64_P001399	10064	301.134	9.034679e+003	9.034718e+002	8243	43.5	9.109214e+000	0	0	0	0	0	0	8449.24	1	1	46.8651	44.2222
DATA	1369	17	9	0	0	A_42_P712191	NM_001109207	10089.5	300.648	9.450121e+001	9.811835e+000	153	40	8.476812e+000	0	0	0	0	0	0	88.6685	1	1	57.5363	40.9722
DATA	1370	17	10	0	0	A_44_P746633	NM_001109580	10114.7	300.662	6.150877e+003	6.150933e+002	5570	41	8.305977e+000	0	0	0	0	0	0	5789.78	1	1	48.5334	41.4516
DATA	1371	17	11	0	0	A_42_P772157	NM_017020	10140.1	300.7	5.396499e+002	5.402870e+001	555	40	9.016977e+000	0	0	0	0	0	0	509.556	1	1	47.2035	40.4
DATA	1372	17	12	0	0	A_44_P407543	NM_001024996	10165.6	301.03	7.448381e+001	7.894087e+000	131	40	8.176152e+000	0	0	0	0	0	0	70.5431	1	1	45.4864	41.129
DATA	1374	17	14	0	0	A_64_P057225	NM_001008857	10216.2	301.075	1.083641e+002	1.114412e+001	165	40	7.825806e+000	0	0	0	0	0	0	103.196	1	1	45.835	39.9189
DATA	1375	17	15	0	0	A_42_P462015	NM_001011943	10241.9	300.935	1.655142e+002	1.675348e+001	224	42.5	9.125856e+000	0	0	0	0	0	0	158.017	1	1	54.4085	42.5938
DATA	1376	17	16	0	0	A_42_P596050	NM_053572	10267.5	301	1.355572e+002	1.380057e+001	188	42	8.187890e+000	0	0	0	1	0	0	129.723	1	1	54.1152	41.8077
DATA	1377	17	17	0	0	A_44_P213776	NM_052829	10292.7	300.88	1.096471e+002	1.126475e+001	165	39	8.035328e+000	0	0	0	0	0	0	105.15	1	1	48.8603	39.931
DATA	1378	17	18	0	0	A_64_P004468	A_64_P004468	10318.1	300.765	4.960109e+003	4.960176e+002	4879	39	9.434605e+000	0	0	0	0	0	0	4765.93	1	1	46.1809	39.4
DATA	1379	17	19	0	0	A_44_P290394	NM_053580	10343.3	300.986	1.471255e+003	1.471480e+002	1464	39	8.533135e+000	0	0	0	0	0	0	1416.17	1	1	47.2035	40.4242
DATA	1380	17	20	0	0	A_64_P076911	XM_215948	10368.4	300.986	7.580064e+001	8.003572e+000	136	37	7.558860e+000	0	0	0	0	0	0	73.0756	1	1	48.2044	39.2273
DATA	1381	17	21	0	0	A_64_P155895	NM_001009658	10394.2	301	1.217669e+003	1.217939e+002	1226	39	5.291037e+000	0	0	0	0	0	0	1175.5	1	1	46.8651	40.069
DATA	1382	17	22	0	0	A_43_P16338	ENSRNOT00000034555	10419.5	301	5.609496e+001	6.167113e+000	118	38	7.043671e+000	0	0	0	0	0	0	54.2139	1	1	54.1152	37.5517
DATA	1383	17	23	0	0	A_42_P716283	NM_001107983	10445	301	2.771701e+002	2.783500e+001	334	37	5.803391e+000	0	0	0	0	0	0	268.122	1	1	54.9904	37.875
DATA	1384	17	24	0	0	A_43_P13355	NM_139082	10470	301.088	6.027688e+001	6.548182e+000	118	39	7.458403e+000	0	0	0	0	0	0	58.3497	1	1	46.8651	39.4722
DATA	1385	17	25	0	0	A_64_P126065	NM_001005900	10495.7	300.775	1.140349e+002	1.168672e+001	172.5	40.5	8.530617e+000	0	0	0	0	0	0	110.437	1	1	47.2035	40.1667
DATA	1386	17	26	0	0	A_44_P838532	NM_001107144	10521.1	300.627	4.275281e+002	4.282919e+001	473	38	7.756288e+000	0	0	0	0	0	0	414.132	1	1	45.835	38
DATA	1387	17	27	0	0	A_42_P785861	NM_001009422	10546.2	300.641	1.831632e+003	1.831810e+002	1847	39	7.800752e+000	0	0	0	0	0	0	1774.26	1	1	44.7812	38.1
DATA	1388	17	28	0	0	A_42_P641962	NM_012999	10572.2	300.735	1.134644e+003	1.134932e+002	1145	41.5	7.121568e+000	0	0	0	0	0	0	1098.86	1	1	46.1809	40.8438
DATA	1389	17	29	0	0	A_64_P085201	TC633318	10597.5	301.352	8.774706e+001	9.140043e+000	150.5	41	8.977665e+000	0	0	0	0	0	0	84.9464	1	1	57.5363	39.9615
DATA	1390	17	30	0	0	A_64_P015687	NM_053573	10622.5	301.176	3.111068e+003	3.111173e+002	2948.5	40.5	8.949173e+000	0	0	0	0	0	0	3009.65	1	1	48.8603	41.9063
DATA	1391	17	31	0	0	A_64_P078332	NM_012794	10648.2	301.28	9.143208e+000	2.720715e+000	70.5	39	9.018289e+000	0	0	0	0	0	0	8.83696	1	0	49.1849	40.2727
DATA	1392	17	32	0	0	A_42_P637189	NM_031612	10673.3	301.312	2.782189e+003	2.782307e+002	2697	40	7.916910e+000	0	0	0	0	0	0	2685.92	1	1	49.8279	38.5128
DATA	1393	17	33	0	0	A_42_P602472	NM_001008290	10699	301.455	1.248634e+003	1.248898e+002	1264	41	8.436666e+000	0	0	0	0	0	0	1203.75	1	1	55.8519	40.0345
DATA	1394	17	34	0	0	A_64_P003749	NM_031799	10724.4	301.427	4.585240e+001	5.257911e+000	106	35	9.397340e+000	0	0	0	0	0	0	44.1325	1	1	57.5363	37.32
DATA	1395	17	35	0	0	A_42_P785861	NM_001009422	10749.6	301.13	1.787327e+003	1.787513e+002	1793	40	8.820309e+000	0	0	0	0	0	0	1717.07	1	1	46.8651	40.7419
DATA	1396	17	36	0	0	A_64_P138889	NM_001013050	10774.9	301.243	1.936745e+003	1.936917e+002	1893.5	40	6.775608e+000	0	0	0	0	0	0	1856.81	1	1	46.5243	40.8621
DATA	1397	17	37	0	0	A_44_P409820	NM_012908	10800.5	301.5	2.595969e+001	3.666444e+000	87	39	7.294370e+000	0	0	0	0	0	0	24.8316	1	1	57.5363	39.9487
DATA	1398	17	38	0	0	A_44_P529880	ENSRNOT00000033370	10825.9	301.5	2.605322e+000	2.605854e+000	67	39	8.320943e+000	0	0	0	0	0	0	2.19761	0	0	65	39.8571
DATA	1399	17	39	0	0	A_64_P084851	ENSRNOT00000029593	10851.4	301.427	1.036088e+002	1.068280e+001	160	40	6.261789e+000	0	0	0	0	0	0	98.5883	1	1	57.5363	41.28
DATA	1400	17	40	0	0	A_44_P654068	NM_001114402	10876.4	301.366	1.970633e+002	1.987845e+001	247	37	7.527062e+000	0	0	0	0	0	0	186.976	1	1	47.8731	36.64
DATA	1401	17	41	0	0	A_64_P094855	NM_001109591	10902.2	300.913	2.045389e+003	2.045557e+002	1989.5	40	9.352695e+000	0	0	0	0	0	0	1934.45	1	1	46.8651	40.5172
DATA	1402	17	42	0	0	A_42_P516658	NM_001024888	10927.4	301.043	2.469394e+002	2.483331e+001	295	38.5	9.428778e+000	0	0	0	0	0	0	232.785	1	1	46.8651	40.6905
DATA	1403	17	43	0	0	A_64_P092394	ENSRNOT00000064749	10952.9	301.5	1.938238e+001	3.272149e+000	81.5	41	9.762274e+000	0	0	0	0	0	0	18.2085	1	1	56.9804	39.9259
DATA	1404	17	44	0	0	A_44_P280755	NM_148890	10978.1	301.203	5.600116e+001	6.193768e+000	113	39	7.136518e+000	0	0	0	0	0	0	52.4164	1	1	46.5243	38.0333
DATA	1405	17	45	0	0	A_42_P629062	AF072835	11003.4	301.514	2.780996e+002	2.793650e+001	318	37.5	6.359179e+000	0	0	0	0	0	0	259.32	1	1	47.8731	37.9286
DATA	1406	17	46	0	0	A_64_P131141	ENSRNOT00000012638	11028.9	301.479	3.078510e+001	4.072873e+000	90.5	38.5	9.363000e+000	0	0	0	0	0	0	28.5916	1	1	47.8731	39.9706
DATA	1407	17	47	0	0	A_42_P756350	NM_021772	11054.5	301.5	5.057524e+001	5.722685e+000	110	41	7.599261e+000	0	0	0	0	0	0	46.7763	1	1	57.5363	42.9655
DATA	1408	17	48	66	-1	(-)3xSLv1	NegativeControl	11079.7	301.5	2.699147e+000	2.689133e+000	56	39	5.275731e+000	0	0	0	0	0	0	-5.91201	0	0	57.5363	40.6
DATA	1409	17	49	0	0	A_64_P124796	A_64_P124796	11105.4	301.573	1.498316e+001	3.088833e+000	74	40	9.898921e+000	0	0	0	0	0	0	13.7381	1	1	57.5363	42.3636
DATA	1410	17	50	0	0	A_44_P288443	NM_001108878	11130.4	301.521	2.568746e+002	2.583034e+001	296	40	6.079600e+000	0	0	0	0	0	0	234.486	1	1	48.2044	40.1923
DATA	1411	17	51	0	0	A_42_P748004	NM_001135873	11155.8	301.361	5.988995e+002	5.995194e+001	592	42	7.027289e+000	0	0	0	0	0	0	544.181	1	1	47.8731	44.129
DATA	1412	17	52	0	0	A_64_P067310	NM_001139507	11181.3	301.493	1.656367e+003	1.656594e+002	1580	42	7.767735e+000	0	0	0	0	0	0	1498	1	1	46.8651	41.2813
DATA	1413	17	53	0	0	A_44_P210809	NM_001107334	11206.6	301.573	1.418245e+002	1.444688e+001	192	37.5	8.260259e+000	0	0	0	0	0	0	127.66	1	1	57.5363	37.8333
DATA	1414	17	54	1028	1	(+)E1A_r60_a104	E1A_r60_a104	11232.4	301.573	2.775260e+000	2.772213e+000	62.5	36	8.732217e+000	0	0	0	0	0	0	1.79462	0	0	57.5363	37.5806
DATA	1415	17	55	0	0	A_44_P1042711	NM_001108426	11257.4	301.902	1.243891e+002	1.274537e+001	164.5	38	6.887129e+000	0	0	0	0	0	0	110.892	1	1	43.7019	36.6071
DATA	1416	17	56	0	0	A_42_P661992	TC596141	11282.8	302	1.338762e+002	1.367558e+001	184	38	9.203816e+000	0	0	0	0	0	0	118.771	1	1	46.1809	37.9091
DATA	1417	17	57	0	0	A_42_P565621	NM_001105971	11308.5	301.648	1.099165e+002	1.134408e+001	155.5	40	8.397979e+000	0	0	0	0	0	0	97.0266	1	1	57.5363	39.6571
DATA	1418	17	58	0	0	A_44_P264600	NM_001013132	11333.4	301.194	6.413402e+001	7.005756e+000	119	40	9.612862e+000	0	0	0	0	0	0	56.3378	1	1	44.0646	41.0435
DATA	1419	17	59	0	0	A_64_P034901	TC591400	11359.4	301.573	1.109504e+001	3.042791e+000	69.5	40.5	1.234970e+001	0	0	0	0	0	0	9.69843	1	0	57.5363	43.5313
DATA	1420	17	60	0	0	A_42_P468216	NM_001030026	11384.5	301.916	1.013929e+003	1.014329e+002	951	40	1.057765e+001	0	0	0	1	0	0	882.132	1	1	49.8279	41.6207
DATA	1421	17	61	0	0	A_64_P062855	XM_343708	11410	302	2.248443e+001	3.638258e+000	80.5	42	8.303780e+000	0	0	0	0	0	0	19.4685	1	1	54.9904	40.6765
DATA	1422	17	62	0	0	A_64_P048421	AABR03055399	11435.1	302.053	3.283352e+000	2.892294e+000	64	39.5	1.117165e+001	0	0	0	0	0	0	2.8298	1	0	47.8731	43.2333
DATA	1423	17	63	0	0	A_44_P342166	NM_013187	11460.7	301.776	1.193713e+002	1.228130e+001	163.5	42	9.631000e+000	0	0	0	0	0	0	102.403	1	1	45.835	42.4483
DATA	1424	17	64	0	0	A_42_P748154	XM_001059949	11486	301.797	1.714539e+003	1.714784e+002	1535	40	1.015757e+001	0	0	0	0	0	0	1464.28	1	1	46.8651	41.6364
DATA	1425	17	65	0	0	A_64_P157763	A_64_P157763	11511.2	301.806	9.271352e+002	9.275926e+001	823	42	1.313268e+001	0	0	0	0	0	0	788.41	1	1	47.5395	42.6571
DATA	1426	17	66	0	0	A_64_P155645	NM_022706	11536.7	301.877	7.703757e+003	7.703812e+002	6373	39	8.308853e+000	0	0	0	0	0	0	6523.8	1	1	48.5334	42.037
DATA	1427	17	67	0	0	A_42_P622436	NM_022298	11562.5	302	4.824232e+004	4.824233e+003	39881	39	7.188781e+000	0	0	0	1	0	0	40688.7	1	1	54.1152	40.75
DATA	1428	17	68	0	0	A_44_P304190	NM_001014044	11587.5	301.877	1.038937e+002	1.079936e+001	147	40.5	1.152683e+001	0	0	0	0	0	0	87.2991	1	1	45.1352	42.2083
DATA	1429	17	69	1028	1	(+)E1A_r60_a104	E1A_r60_a104	11613.1	302.065	2.968916e+000	2.957902e+000	59	43.5	1.065851e+001	0	0	0	0	0	0	-1.30848	0	0	54.4085	43.4063
DATA	1430	17	70	0	0	A_42_P771373	NM_012614	11638.2	302	5.560106e+003	5.560186e+002	4698	40	8.630878e+000	0	0	0	1	0	0	4640.3	1	1	46.8651	41.2778
DATA	1431	17	71	0	0	A_64_P101976	A_64_P101976	11664.1	301.893	2.365058e+001	3.801940e+000	79	40.5	5.959741e+000	0	0	0	0	0	0	19.677	1	1	47.8731	41.5
DATA	1432	17	72	0	0	A_42_P777935	ENSRNOT00000027369	11689.2	302.118	1.345664e+002	1.378366e+001	169	39	6.801961e+000	0	0	0	0	0	0	111.664	1	1	46.5243	40
DATA	1433	17	73	0	0	A_64_P041521	NM_012945	11714.6	302.427	9.923518e+001	1.036464e+001	142	42	8.568361e+000	0	0	0	0	0	0	82.1543	1	1	57.5363	41.3714
DATA	1434	17	74	0	0	A_44_P102661	NM_138862	11739.6	301.841	6.400205e+002	6.407222e+001	578	39.5	8.299432e+000	0	0	0	0	0	0	528.746	1	1	47.2035	38.7059
DATA	1435	17	75	0	0	A_42_P714166	NM_001017491	11765.5	302.352	5.373901e+000	3.050311e+000	65	41	7.999748e+000	0	0	0	0	0	0	4.43258	1	0	57.5363	41.9375
DATA	1436	17	76	0	0	A_64_P098703	NM_198728	11790.5	301.818	5.017214e+002	5.026214e+001	486	46	9.617692e+000	0	0	0	0	0	0	413.299	1	1	45.835	46.5
DATA	1437	17	77	0	0	A_44_P624151	NM_001107932	11816.2	301.662	2.288907e+002	2.308601e+001	248	44	8.174706e+000	0	0	0	0	0	0	188.396	1	1	45.4864	42.2973
DATA	1438	17	78	0	0	A_42_P674843	NM_001008880	11841.3	302.122	2.600897e+002	2.618252e+001	278	41	1.002223e+001	0	0	0	0	0	0	214.027	1	1	48.8603	41.3871
DATA	1439	17	79	0	0	A_44_P1039634	NM_001108924	11867	302.455	8.275769e+001	8.805794e+000	125	43	8.260771e+000	0	0	0	0	0	0	68.1179	1	1	65	41.7714
DATA	1440	17	80	0	0	A_42_P517253	NM_001012275	11892	302.319	2.740807e+002	2.757251e+001	288.5	43	7.695647e+000	0	0	0	1	0	0	225.748	1	1	48.2044	43.1333
DATA	1441	17	81	0	0	A_42_P485589	NM_017246	11917.6	301.833	1.128192e+002	1.167483e+001	153	39	7.611082e+000	0	0	0	0	0	0	93.0353	1	1	45.4864	40
DATA	1442	17	82	66	1	DarkCorner	DarkCorner	11943.5	302.111	3.008598e+000	2.997436e+000	59.5	40	1.099702e+001	0	0	0	0	0	0	-0.820523	0	0	47.8731	41.6296
DATA	1443	17	83	66	1	DarkCorner	DarkCorner	11968.2	302.259	3.001214e+000	2.990079e+000	57	36	9.051659e+000	0	0	0	0	0	0	-3.10359	0	0	50.7771	37.1944
DATA	1444	17	84	66	1	DarkCorner	DarkCorner	11994	302.455	2.991525e+000	2.980426e+000	58	41	9.384992e+000	0	0	0	0	0	0	-2.04518	0	0	55.8519	41.7568
DATA	1445	17	85	66	1	DarkCorner	DarkCorner	12019.5	302.5	2.979972e+000	2.968916e+000	59.5	35	5.758647e+000	0	0	0	0	0	0	-1.41369	0	0	65	34.6429
DATA	1446	18	1	66	1	DarkCorner	DarkCorner	9899	307.925	2.718359e+000	2.708274e+000	57	38	6.176977e+000	0	0	0	0	0	0	-5.39254	0	0	49.5074	38.186
DATA	1447	18	2	66	1	DarkCorner	DarkCorner	9924.44	308.137	2.708197e+000	2.698149e+000	59.5	42.5	9.925721e+000	0	0	0	0	0	0	-2.04396	0	0	48.5334	42.2083
DATA	1448	18	3	66	1	DarkCorner	DarkCorner	9949.36	308.09	2.698435e+000	2.688423e+000	58.5	40	8.018361e+000	0	0	0	0	0	0	-4.02372	0	0	45.835	40
DATA	1449	18	4	0	0	A_42_P608713	TC595074	9974.97	307.925	2.337708e+002	2.353004e+001	284	40	8.114412e+000	0	0	0	0	0	0	216.146	1	1	46.8651	39.5333
DATA	1450	18	5	0	0	A_44_P411771	XM_001056376	10000.5	308.056	2.672492e+002	2.685785e+001	304	41.5	7.592784e+000	0	0	0	0	0	0	248.002	1	1	48.5334	41.5417
DATA	1451	18	6	0	0	A_42_P703647	NM_001108688	10025.3	308.185	1.656443e+001	3.133253e+000	80	43	9.190451e+000	0	0	0	0	0	0	15.425	1	1	45.4864	41.8148
DATA	1452	18	7	0	0	A_64_P139212	NM_001030052	10051.1	308.104	1.022224e+004	1.022227e+003	9482	44	7.396985e+000	0	0	0	0	0	0	9552.54	1	1	46.8651	44.3462
DATA	1453	18	8	0	0	A_64_P082461	FQ211879	10076.6	308.427	6.802069e+001	7.296855e+000	124	43	7.838710e+000	0	0	0	0	0	0	63.7829	1	1	57.5363	42.2857
DATA	1454	18	9	0	0	A_64_P144053	NM_001108100	10102	307.615	1.991533e+002	2.008861e+001	247	41	7.037777e+000	0	0	0	0	0	0	187.338	1	1	45.4864	40.303
DATA	1455	18	10	0	0	A_42_P455802	NM_001013929	10127.4	307.735	1.753492e+003	1.753688e+002	1648	41	8.682079e+000	0	0	0	0	0	0	1654.68	1	1	46.5243	41.3871
DATA	1456	18	11	0	0	A_44_P575367	ENSRNOT00000068160	10153	308.455	5.115210e+000	2.665831e+000	65	40	9.154586e+000	0	0	0	0	0	0	4.84219	1	0	55.8519	40.8387
DATA	1457	18	12	0	0	A_64_P008259	ENSRNOT00000040453	10178.4	308.048	2.599025e+003	2.599156e+002	2529	40	9.303053e+000	0	0	0	0	0	0	2467.29	1	1	50.4627	41.2414
DATA	1458	18	13	0	0	A_44_P433935	NM_001024894	10203.4	308.803	4.941255e+000	2.648128e+000	67	40	9.659827e+000	0	0	0	0	0	0	4.7039	1	0	42.9674	39.3043
DATA	1459	18	14	0	0	A_64_P027747	TC585156	10228.8	308.301	4.335934e+003	4.336012e+002	4099	40.5	7.712472e+000	0	0	0	0	0	0	4138.03	1	1	48.2044	40.6316
DATA	1460	18	15	0	0	A_44_P247880	ENSRNOT00000032333	10254.6	308.427	5.882993e+000	2.654722e+000	68.5	45	1.045966e+001	0	0	0	0	0	0	5.62832	1	0	57.5363	43.5926
DATA	1461	18	16	0	0	A_44_P422321	NM_001105813	10279.7	308.292	7.509272e+002	7.513713e+001	775.5	40	8.632140e+000	0	0	0	0	0	0	719.997	1	1	47.8731	39.8261
DATA	1462	18	17	0	0	A_44_P374824	ENSRNOT00000025777	10305.4	308.427	1.713810e+001	3.095401e+000	78	42	9.252080e+000	0	0	0	0	0	0	16.4665	1	1	65	41.6207
DATA	1463	18	18	0	0	A_64_P029482	A_64_P029482	10330.6	308.427	5.835467e+001	6.377514e+000	119	44	8.744738e+000	0	0	0	0	0	0	56.1708	1	1	65	42.5517
DATA	1464	18	19	0	0	A_64_P083918	NM_053396	10356.5	307.868	1.877070e+001	3.181508e+000	83	38	1.009950e+001	0	0	0	0	0	0	18.0975	1	1	49.1849	38.6
DATA	1465	18	20	1028	1	(+)E1A_r60_3	E1A_r60_3	10381.6	308.236	1.680349e+001	3.066388e+000	78	41	5.742286e+000	0	0	0	0	0	0	16.2248	1	1	47.8731	41.4231
DATA	1466	18	21	0	0	A_42_P508415	CV108834	10406.8	308.41	9.848743e+001	1.017647e+001	155	37.5	6.825518e+000	0	0	0	0	0	0	95.2144	1	1	50.1463	36.8438
DATA	1467	18	22	0	0	A_64_P018331	NM_001107720	10432.1	308.394	9.767603e+002	9.770955e+001	999	36.5	5.017430e+000	0	0	0	0	0	0	945.259	1	1	47.5395	36.7143
DATA	1468	18	23	0	0	A_64_P142056	NM_001011938	10457.5	308.5	4.824392e+003	4.824460e+002	4636	37.5	5.636600e+000	0	0	0	0	0	0	4672.6	1	1	49.1849	37.7667
DATA	1469	18	24	0	0	A_44_P1030098	NM_001105866	10483.3	308.5	7.685430e+001	8.099193e+000	134.5	40.5	8.725942e+000	0	0	0	0	0	0	74.48	1	1	57.5363	40.5278
DATA	1470	18	25	0	0	A_64_P125958	NM_177933	10508.5	308.5	4.706537e+001	5.355191e+000	108	40	7.590754e+000	0	0	0	0	0	0	45.6271	1	1	57.5363	39.9667
DATA	1471	18	26	0	0	A_64_P002066	XM_001056138	10533.9	308.5	5.241314e+001	5.830641e+000	113	39	7.754014e+000	0	0	0	0	0	0	50.8176	1	1	56.9804	38.4839
DATA	1472	18	27	0	0	A_42_P521242	ENSRNOT00000003841	10559	308.032	3.124175e+002	3.134603e+001	372	40	7.279069e+000	0	0	0	0	0	0	302.859	1	1	44.7812	39.5
DATA	1473	18	28	0	0	A_42_P652827	NM_001024274	10584.1	308.243	1.336571e+003	1.336815e+002	1352.5	41.5	8.049845e+000	0	0	0	0	0	0	1295.27	1	1	46.5243	40.6
DATA	1474	18	29	0	0	A_42_P533792	NM_001106575	10609.8	308.644	4.116768e+003	4.116847e+002	3878	40.5	6.817733e+000	0	0	0	0	0	0	3987.44	1	1	48.5334	39.5
DATA	1475	18	30	1028	1	(+)E1A_r60_1	E1A_r60_1	10635.5	308.5	2.568644e+000	2.559114e+000	61	37	6.426605e+000	0	0	0	0	0	0	-0.462285	0	0	57.5363	38.8235
DATA	1476	18	31	0	0	A_64_P210103	NM_001100666	10660.9	308.757	8.355544e+001	8.739421e+000	145.5	39	9.736977e+000	0	0	0	0	0	0	80.7811	1	1	48.2044	38.9394
DATA	1477	18	32	0	0	A_64_P131745	A_64_P131745	10686.5	308.662	4.872648e+001	5.506545e+000	110.5	40	7.236519e+000	0	0	0	0	0	0	47.0477	1	1	46.5243	38.7647
DATA	1478	18	33	0	0	A_64_P017791	XM_002727063	10712.1	308.674	4.242439e+000	2.603717e+000	64.5	33	8.398718e+000	0	0	0	0	0	0	4.09006	1	0	37.4241	35.6667
DATA	1479	18	34	0	0	A_42_P560288	NM_198788	10736.6	308.406	4.481426e+003	4.481500e+002	4227.5	37	7.868219e+000	0	0	0	0	0	0	4313.11	1	1	47.5395	38.1379
DATA	1480	18	35	0	0	A_42_P571463	NM_001013221	10762.2	308.471	8.788624e+002	8.792405e+001	912	41	7.314887e+000	0	0	0	0	0	0	844.196	1	1	47.2035	42.8485
DATA	1481	18	36	0	0	A_42_P648207	NM_001013882	10787.6	308.573	3.788228e+002	3.797030e+001	431.5	39.5	7.396049e+000	0	0	0	0	0	0	363.096	1	1	57.5363	39.3077
DATA	1482	18	37	0	0	A_64_P120833	NM_131910	10812.8	308.761	5.911915e+003	5.911972e+002	5415	40	9.053343e+000	0	0	0	0	0	0	5653.19	1	1	46.8651	41.0857
DATA	1483	18	38	0	0	A_42_P705337	TC582694	10838.1	308.616	1.595830e+003	1.596041e+002	1556	41	7.813877e+000	0	0	0	0	0	0	1522.01	1	1	48.5334	40.84
DATA	1484	18	39	0	0	A_44_P544340	NM_001034939	10863.4	308.662	3.026568e+002	3.037749e+001	348.5	36	9.029781e+000	0	0	0	0	0	0	287.854	1	1	49.8279	37.4138
DATA	1486	18	41	0	0	A_44_P310596	NM_001014166	10914.5	308.5	3.900993e+002	3.909784e+001	431	40	8.129728e+000	0	0	0	0	0	0	368.704	1	1	49.1849	41.3226
DATA	1487	18	42	0	0	A_64_P013409	A_64_P013409	10940.9	308.716	2.639334e+000	2.629541e+000	61	42	9.998044e+000	0	0	0	0	0	0	-0.277265	0	0	45.835	42.3421
DATA	1488	18	43	0	0	A_64_P076485	A_64_P076485	10965.6	308.761	2.163800e+003	2.163961e+002	2146.5	39.5	7.038466e+000	0	0	0	0	0	0	2030.95	1	1	46.5243	39.5
DATA	1489	18	44	0	0	A_64_P096121	ENSRNOT00000028891	10991	309	3.480687e+001	4.373735e+000	94	38	7.684229e+000	0	0	0	0	0	0	32.5488	1	1	54.9904	39.2813
DATA	1490	18	45	0	0	A_42_P521086	NM_001100857	11016.4	308.957	3.041081e+001	4.039490e+000	90	39.5	7.290902e+000	0	0	0	0	0	0	28.3272	1	1	46.5243	38.9375
DATA	1491	18	46	0	0	A_64_P143133	TC637520	11041.3	308.69	5.988136e+001	6.556218e+000	117	40	9.605995e+000	0	0	0	0	0	0	55.5554	1	1	42.2201	42.1429
DATA	1492	18	47	0	0	A_64_P067163	NM_017248	11067.5	309	2.746604e+004	2.746606e+003	25282.5	41	6.932643e+000	0	0	0	0	0	0	25373.3	1	1	54.1152	42.6923
DATA	1493	18	48	0	0	A_64_P118288	NM_053448	11092.3	308.971	3.179722e+002	3.191099e+001	347	43	7.148840e+000	0	0	0	0	0	0	292.508	1	1	46.1809	42.9655
DATA	1494	18	49	0	0	A_64_P112342	A_64_P112342	11117.8	309.031	4.775072e+001	5.487648e+000	106.5	40	8.828108e+000	0	0	0	0	0	0	43.7318	1	1	45.835	40.25
DATA	1495	18	50	0	0	A_64_P074741	NM_001077680	11143.3	308.73	4.488536e+001	5.246657e+000	104.5	43	7.292448e+000	0	0	0	0	0	0	40.9193	1	1	45.1352	43.5862
DATA	1496	18	51	0	0	A_64_P153062	NM_001107890	11168.4	308.853	2.137985e+002	2.155333e+001	251	42	8.087575e+000	0	0	0	0	0	0	194.018	1	1	46.8651	42.1379
DATA	1497	18	52	0	0	A_64_P051942	A_64_P051942	11194.1	309.065	2.816359e+002	2.829676e+001	321	40	7.444507e+000	0	0	0	0	0	0	254.374	1	1	54.4085	40.4
DATA	1498	18	53	0	0	A_44_P233080	ENSRNOT00000026303	11219.3	309	2.036674e+003	2.036860e+002	1834	37	7.949918e+000	0	0	0	0	0	0	1830.81	1	1	46.1809	39.5135
DATA	1499	18	54	0	0	A_64_P127747	A_64_P127747	11244.9	309.386	7.877555e+001	8.349851e+000	131.5	39.5	8.737541e+000	0	0	0	0	0	0	70.4733	1	1	57.259	38.7692
DATA	1500	18	55	0	0	A_42_P773155	NM_001106996	11270.4	309.427	1.793112e+004	1.793114e+003	15405	38	7.985207e+000	0	0	0	1	0	0	15963.3	1	1	57.5363	36.0741
DATA	1501	18	56	0	0	A_64_P003624	NM_175591	11295.6	309.427	3.245185e+001	4.283187e+000	89	39	9.898921e+000	0	0	0	0	0	0	28.7511	1	1	57.5363	39.3636
DATA	1502	18	57	0	0	A_64_P148728	NM_030989	11321.1	309.386	2.204093e+002	2.221923e+001	256.5	42	7.344979e+000	0	0	0	0	0	0	194.318	1	1	57.259	41.5556
DATA	1503	18	58	0	0	A_44_P436284	ENSRNOT00000031389	11346	308.774	2.523287e+002	2.539029e+001	282	40	1.172320e+001	0	0	0	0	0	0	221.378	1	1	45.4864	42.55
DATA	1504	18	59	0	0	A_42_P626851	NM_001107917	11371.6	308.701	3.923117e+002	3.933359e+001	394	38	1.065053e+001	0	0	0	0	0	0	342.513	1	1	46.1809	39.2143
DATA	1505	18	60	0	0	A_42_P797303	TC587453	11396.9	308.894	7.099348e+003	7.099405e+002	6064	42.5	9.531896e+000	0	0	0	1	0	0	6168.82	1	1	46.1809	42.8158
DATA	1506	18	61	0	0	A_64_P096312	A_64_P096312	11422.4	308.911	2.307197e+003	2.307375e+002	2133	42	6.821844e+000	0	0	0	0	0	0	1995.3	1	1	42.9674	42.913
DATA	1507	18	62	0	0	A_64_P150894	A_64_P150894	11448	309.455	1.475982e+002	1.503758e+001	186	40	9.779094e+000	0	0	0	0	0	0	127.063	1	1	55.8519	41.4545
DATA	1508	18	63	0	0	A_64_P241372	NM_001000593	11473.3	309.583	1.758071e+001	3.382611e+000	75	39	8.270299e+000	0	0	0	0	0	0	15.067	1	1	43.3362	41.2581
DATA	1509	18	64	0	0	A_44_P433621	NM_001025016	11498.5	309.3	1.563516e+002	1.590230e+001	193	38	8.461170e+000	0	0	0	0	0	0	133.407	1	1	47.2035	39.4839
DATA	1510	18	65	0	0	A_64_P163511	NM_013190	11523.8	309.101	1.307571e+003	1.307896e+002	1173	38	9.459023e+000	0	0	0	0	0	0	1110.95	1	1	46.5243	38.8387
DATA	1511	18	66	0	0	A_44_P129412	AF155959	11549.3	309	1.086121e+003	1.086515e+002	936	39	5.710683e+000	0	0	0	0	0	0	919.02	1	1	45.4864	39.0313
DATA	1512	18	67	0	0	A_64_P143037	NM_001025134	11575	309.455	3.649579e+002	3.661387e+001	368	39	9.355006e+000	0	0	0	0	0	0	307.622	1	1	55.8519	40.871
DATA	1513	18	68	0	0	A_64_P032693	XM_002724830	11600.1	309.045	1.824623e+001	3.467926e+000	76	43	1.127296e+001	0	0	0	0	0	0	15.3231	1	1	46.5243	43.2188
DATA	1514	18	69	0	0	A_42_P727368	NM_001025693	11625.5	309.235	5.704532e+001	6.426350e+000	109	45	1.084207e+001	0	0	0	0	0	0	47.7446	1	1	46.8651	43.9667
DATA	1515	18	70	0	0	A_64_P075765	A_64_P075765	11651.3	309.185	2.568928e+001	3.925809e+000	82	38	5.799839e+000	0	0	0	0	0	0	21.4321	1	1	45.4864	39.027
DATA	1516	18	71	0	0	A_42_P639174	NM_001106592	11676.5	309.386	1.017611e+003	1.018046e+002	898.5	39	8.707094e+000	0	0	0	0	0	0	846.609	1	1	47.5395	40.0357
DATA	1517	18	72	0	0	A_64_P063135	NM_001109623	11701.9	309.5	5.140404e+001	5.943942e+000	101.5	35.5	8.740797e+000	0	0	0	0	0	0	42.6583	1	1	56.9804	38.8077
DATA	1518	18	73	0	0	A_64_P018236	NM_001108882	11727.4	309.573	7.861484e+000	3.092544e+000	67	43	9.066802e+000	0	0	0	0	0	0	6.50968	1	0	57.5363	42.7241
DATA	1519	18	74	0	0	A_43_P14648	NM_001012034	11752.6	309.573	3.875857e+002	3.887422e+001	374	40	7.402779e+000	0	0	0	0	0	0	320.36	1	1	57.5363	39.3636
DATA	1520	18	75	0	0	A_42_P698520	NM_001108216	11777.9	309.464	4.123832e+003	4.123941e+002	3489	44.5	9.753514e+000	0	0	0	1	0	0	3403.65	1	1	47.5395	45.2
DATA	1521	18	76	0	0	A_43_P19450	NM_001105713	11803.2	309.063	1.395933e+002	1.427887e+001	174	42	9.499272e+000	0	0	0	0	0	0	115.092	1	1	45.835	42.9744
DATA	1522	18	77	0	0	A_64_P013012	XM_225619	11828.9	309.809	2.979920e+002	2.995035e+001	308.5	41	8.062072e+000	0	0	0	0	0	0	245.586	1	1	46.5243	41.0541
DATA	1523	18	78	0	0	A_42_P499684	NM_001108642	11853.9	309.462	1.889743e+002	1.913494e+001	213	41	8.637713e+000	0	0	0	1	0	0	155.721	1	1	44.7812	41.5143
DATA	1524	18	79	0	0	A_64_P297479	ENSRNOT00000044350	11879.4	309.704	1.187186e+004	1.187189e+003	9867	43.5	8.922918e+000	0	0	0	0	0	0	9787.65	1	1	48.2044	42.5385
DATA	1525	18	80	0	0	A_64_P103238	NM_001014158	11905.2	309.562	1.616285e+002	1.643911e+001	193	41	7.336223e+000	0	0	0	0	0	0	133.385	1	1	48.2044	39.6571
DATA	1526	18	81	0	0	A_42_P751562	NM_001037355	11930.4	309.377	1.941345e+003	1.941576e+002	1665.5	39.5	8.808115e+000	0	0	0	1	0	0	1604.56	1	1	47.5395	39.5882
DATA	1527	18	82	66	1	DarkCorner	DarkCorner	11955.9	309.614	3.000916e+000	2.989782e+000	58	39	8.710518e+000	0	0	0	0	0	0	-1.77324	0	0	57.259	39.8387
DATA	1528	18	83	66	1	DarkCorner	DarkCorner	11981.5	309.984	2.992182e+000	2.981081e+000	55.5	37	1.019535e+001	0	0	0	0	0	0	-1.75483	0	0	44.0646	39.1707
DATA	1529	18	84	66	1	DarkCorner	DarkCorner	12006.6	309.573	2.982080e+000	2.971287e+000	61.5	39.5	9.395226e+000	0	0	0	0	0	0	0.33433	0	0	57.5363	41
DATA	1530	18	85	66	1	DarkCorner	DarkCorner	12032	309.528	2.969599e+000	2.967347e+000	59	34	8.495361e+000	0	0	0	0	0	0	1.90782	0	0	48.5334	34.6989
DATA	1531	19	1	66	1	DarkCorner	DarkCorner	9886.22	315.151	2.720208e+000	2.710116e+000	57	35	7.460005e+000	0	0	0	0	0	0	-3.33835	0	0	47.8731	34.7237
DATA	1532	19	2	66	1	DarkCorner	DarkCorner	9911.95	314.747	2.710268e+000	2.700213e+000	58	42	6.371697e+000	0	0	0	0	0	0	-4.07156	0	0	48.8603	42.2069
DATA	1533	19	3	66	1	DarkCorner	DarkCorner	9936.68	315.309	2.700361e+000	2.690343e+000	59	43	9.093430e+000	0	0	0	0	0	0	-5.11993	0	0	51.0895	42.9048
DATA	1534	19	4	66	1	DarkCorner	DarkCorner	9962.58	315.427	2.690293e+000	2.680312e+000	58	40	7.643309e+000	0	0	0	0	0	0	-1.3427	0	0	57.5363	40.1429
DATA	1535	19	5	0	0	A_44_P198705	NM_012578	9987.69	315.338	5.484409e+003	5.484474e+002	5000	39	8.314774e+000	0	0	0	0	0	0	5085.7	1	1	48.5334	39.7241
DATA	1536	19	6	0	0	A_42_P604252	NM_001108797	10013.1	315.284	5.562050e+002	5.568413e+001	583	42	8.488039e+000	0	0	0	0	0	0	517.604	1	1	48.5334	41.2414
DATA	1537	19	7	0	0	A_43_P20016	NM_001107377	10038.6	315.356	7.292867e+001	7.760106e+000	130.5	42.5	8.848468e+000	0	0	0	0	0	0	68.1055	1	1	48.5334	40.8462
DATA	1538	19	8	0	0	A_42_P491486	NM_022533	10063.7	315.532	1.868539e+003	1.868726e+002	1695	48	7.221513e+000	0	0	0	0	0	0	1750.87	1	1	49.8279	45.6897
DATA	1539	19	9	0	0	A_64_P345929	NM_001191639	10089.3	315.632	1.440229e+001	3.002270e+000	75.5	43	7.954175e+000	0	0	0	0	0	0	13.5405	1	1	46.5243	42.2857
DATA	1540	19	10	0	0	A_64_P152047	NM_001000521	10114.9	315.5	3.160545e+000	2.644814e+000	66	41	7.547128e+000	0	0	0	0	0	0	2.98095	1	0	56.9804	39.6774
DATA	1541	19	11	0	0	A_42_P724510	NM_001007625	10140.2	315.176	7.147354e+003	7.147402e+002	6405.5	44	1.041846e+001	0	0	0	0	0	0	6761.6	1	1	48.2044	44.3125
DATA	1542	19	12	0	0	A_42_P552906	NM_001007701	10165.4	315.213	1.048368e+003	1.048693e+002	1039	40	8.830367e+000	0	0	0	0	0	0	994.688	1	1	49.1849	42.1538
DATA	1543	19	13	0	0	A_64_P121673	A_64_P121673	10191.1	315.5	5.320705e+000	2.656662e+000	67	39	6.611102e+000	0	0	0	0	0	0	5.06276	1	0	56.9804	37.96
DATA	1544	19	14	0	0	A_64_P047470	NM_001008875	10215.5	315.846	3.509700e+001	4.365526e+000	95.5	42.5	8.290621e+000	0	0	0	0	0	0	33.4819	1	1	45.1352	41.4118
DATA	1545	19	15	0	0	A_43_P14911	NM_031512	10241.7	315.5	1.908517e+002	1.926006e+001	249	45	9.785986e+000	0	0	0	0	0	0	182.528	1	1	65	44.4
DATA	1546	19	16	0	0	A_44_P117234	NM_001191788	10266.8	315.5	1.810217e+001	3.154734e+000	79	41	1.010087e+001	0	0	0	0	0	0	17.3522	1	1	46.5243	42.1304
DATA	1547	19	17	0	0	A_64_P066782	ENSRNOT00000046676	10292.6	315.319	2.125968e+002	2.141544e+001	258	40.5	9.410326e+000	0	0	0	0	0	0	204.226	1	1	48.5334	41.0357
DATA	1548	19	18	0	0	A_64_P125013	NM_019167	10318.1	315.5	2.566492e+004	2.566494e+003	24644.5	43	7.848971e+000	0	0	0	0	0	0	24703.1	1	1	56.9804	41.7778
DATA	1549	19	19	0	0	A_64_P143121	NM_001099510	10343.5	315.485	9.769295e+000	2.748099e+000	72.5	38	9.729030e+000	0	0	0	0	0	0	9.41961	1	0	46.5243	39.9667
DATA	1550	19	20	0	0	A_64_P065600	NM_022954	10368.6	315.573	2.574204e+000	2.564653e+000	60	39.5	8.375133e+000	0	0	0	0	0	0	-3.01076	0	0	65	41.9286
DATA	1551	19	21	0	0	A_44_P300818	AF030087	10393.9	315.389	3.345492e+002	3.355282e+001	393	39	7.533010e+000	0	0	0	0	0	0	323.495	1	1	48.2044	39.7097
DATA	1552	19	22	0	0	A_64_P103130	A_64_P103130	10419.6	315.573	1.507727e+003	1.507944e+002	1543	35	6.699005e+000	0	0	0	0	0	0	1459.6	1	1	57.5363	35.72
DATA	1553	19	23	0	0	A_64_P064938	NM_001109332	10445	315.545	8.193555e+000	2.684116e+000	70	37	5.300264e+000	0	0	0	0	0	0	7.93919	1	0	55.8519	37.9697
DATA	1554	19	24	0	0	A_64_P087276	NM_138527	10470.4	315.573	2.563747e+000	2.554235e+000	56.5	39	6.975666e+000	0	0	0	0	0	0	-4.25785	0	0	57.5363	38.8462
DATA	1555	19	25	0	0	A_64_P032728	NM_001037778	10495.6	315.37	7.929461e+003	7.929502e+002	7561.5	43.5	7.552234e+000	0	0	0	0	0	0	7691.96	1	1	48.2044	43.9167
DATA	1556	19	26	0	0	A_44_P956203	NM_001134992	10521.4	315.573	1.352912e+001	2.888839e+000	76	38	7.098690e+000	0	0	0	0	0	0	13.1273	1	1	65	37.4839
DATA	1557	19	27	0	0	A_64_P106488	A_64_P106488	10546.7	315.522	4.364944e+001	5.056460e+000	102.5	40	7.781948e+000	0	0	0	0	0	0	42.353	1	1	46.8651	39.9394
DATA	1558	19	28	0	0	A_43_P10011	NM_001025274	10571.8	315.459	2.460858e+002	2.474066e+001	307	39	7.068732e+000	0	0	0	0	0	0	238.722	1	1	48.8603	38.7568
DATA	1559	19	29	0	0	A_44_P321009	NM_012540	10597.5	316	8.675476e+000	2.697393e+000	68	41	8.234222e+000	0	0	0	0	0	0	8.41249	1	0	54.1152	38.5625
DATA	1560	19	30	0	0	A_44_P133453	XM_236776	10622.4	316.027	2.775896e+003	2.776014e+002	2653	38.5	5.630479e+000	0	0	0	0	0	0	2689.94	1	1	48.5334	39.5667
DATA	1561	19	31	0	0	A_64_P027323	NM_001000088	10647.9	315.884	6.206641e+001	6.713178e+000	126	38	8.556627e+000	0	0	0	0	0	0	60.088	1	1	46.8651	39.6111
DATA	1562	19	32	0	0	A_44_P374568	NM_001107778	10672.9	315.896	1.669729e+002	1.689256e+001	232	38	8.662334e+000	0	0	0	0	0	0	161.468	1	1	46.8651	38.2703
DATA	1563	19	33	0	0	A_64_P040176	NM_001108498	10698.9	315.789	1.207782e+003	1.208054e+002	1218	37	8.816714e+000	0	0	0	0	0	0	1166.3	1	1	47.2035	37.8286
DATA	1564	19	34	0	0	A_64_P347204	ENSRNOT00000002350	10724.3	315.718	8.315119e+001	8.702900e+000	145	35.5	7.583788e+000	0	0	0	0	0	0	80.1651	1	1	47.5395	35.9231
DATA	1565	19	35	0	0	A_64_P142544	A_64_P142544	10749.7	315.803	1.664916e+001	3.065186e+000	78	42	8.128537e+000	0	0	0	0	0	0	16.022	1	1	45.4864	42.8387
DATA	1566	19	36	0	0	A_64_P047367	NM_017050	10775.4	316.069	3.332169e+004	3.332170e+003	32256.5	39	6.277759e+000	0	0	0	0	0	0	32000.7	1	1	53.8203	39.4444
DATA	1567	19	37	0	0	A_64_P130858	NM_001003705	10800.4	315.913	5.994904e+001	6.528371e+000	120	38.5	9.117370e+000	0	0	0	0	0	0	57.4426	1	1	46.5243	40.6667
DATA	1568	19	38	0	0	A_42_P647009	NM_053814	10825.6	316.028	1.283493e+003	1.283754e+002	1301	40	8.833783e+000	0	0	0	0	0	0	1226.82	1	1	48.2044	41.0357
DATA	1569	19	39	0	0	A_42_P618538	NM_001030031	10850.8	316	5.002388e+002	5.009130e+001	538	39	6.593012e+000	0	0	0	0	0	0	476.868	1	1	46.8651	39.0303
DATA	1570	19	40	0	0	A_64_P048225	NM_001108643	10876.5	316	2.241874e+001	3.437357e+000	83.5	33	6.766514e+000	0	0	0	0	0	0	21.3088	1	1	65	34
DATA	1571	19	41	0	0	A_64_P044826	A_64_P044826	10901.9	315.814	8.845128e+001	9.223245e+000	146	39	7.549508e+000	0	0	0	0	0	0	83.8101	1	1	46.8651	38.931
DATA	1572	19	42	0	0	A_64_P046273	NM_001168559	10927	315.687	1.460100e+002	1.483462e+001	205	40	9.862516e+000	0	0	0	0	0	0	137.899	1	1	45.835	41.25
DATA	1573	19	43	0	0	A_43_P16232	NM_024395	10952.7	316.167	6.263814e+002	6.269339e+001	661	42	1.111283e+001	0	0	0	0	0	0	589.551	1	1	47.8731	42.069
DATA	1574	19	44	0	0	A_44_P147356	XM_225859	10978	315.922	7.276723e+003	7.276771e+002	6895	37	8.131180e+000	0	0	0	0	0	0	6823.83	1	1	46.1809	38.5667
DATA	1575	19	45	0	0	A_44_P979417	ENSRNOT00000068382	11003.6	316.043	1.103433e+001	2.871594e+000	73	40	7.673302e+000	0	0	0	0	0	0	10.3081	1	0	47.8731	40.7097
DATA	1576	19	46	0	0	A_44_P283784	NM_001107682	11028.7	316	3.498876e+002	3.508984e+001	396	40	9.441630e+000	0	0	0	0	0	0	325.58	1	1	45.4864	40.3529
DATA	1577	19	47	0	0	A_44_P112061	ENSRNOT00000046359	11054.3	316.237	2.619543e+002	2.633140e+001	307	40	8.660652e+000	0	0	0	0	0	0	242.757	1	1	49.5074	40.4
DATA	1578	19	48	0	0	A_42_P541025	NM_212546	11079.6	316.135	2.027736e+002	2.045420e+001	243	43	5.493798e+000	0	0	0	0	0	0	187.12	1	1	48.5334	42
DATA	1579	19	49	0	0	A_44_P156521	NM_001025135	11105	315.774	7.009077e+002	7.014259e+001	711	39	8.520859e+000	0	0	0	0	0	0	643.952	1	1	45.4864	40.4286
DATA	1580	19	50	0	0	A_42_P562202	NM_001107959	11130.5	315.727	4.999998e+001	5.686167e+000	106	39	8.542116e+000	0	0	0	0	0	0	45.7307	1	1	46.5243	38.5
DATA	1581	19	51	0	0	A_42_P522899	NM_021578	11156	316.455	8.742325e+001	9.155705e+000	145	42	8.111556e+000	0	0	0	0	0	0	79.6002	1	1	55.8519	41.8788
DATA	1582	19	52	0	0	A_42_P581060	NM_001108722	11181.3	316.014	5.226455e+003	5.226527e+002	4650	40.5	7.740400e+000	0	0	0	0	0	0	4736.43	1	1	47.2035	40.5
DATA	1583	19	53	0	1	ERCC-00043_129	ERCC-00043_129	11206.7	316.5	2.755857e+000	2.745633e+000	59	38	8.797015e+000	0	0	0	0	0	0	-1.33401	0	0	57.5363	40.1852
DATA	1584	19	54	0	0	A_64_P098577	A_64_P098577	11232.3	316.5	2.769229e+000	2.758955e+000	61	39	9.440078e+000	0	0	0	0	0	0	-0.970623	0	0	57.5363	39.6786
DATA	1585	19	55	0	0	A_64_P043164	ENSRNOT00000009696	11257.6	316.438	3.068852e+002	3.081349e+001	333.5	38	9.673320e+000	0	0	0	0	0	0	274.16	1	1	48.2044	37.1304
DATA	1586	19	56	0	0	A_42_P576446	NM_001107673	11282.7	316.611	2.942132e+003	2.942264e+002	2642	40.5	9.085354e+000	0	0	0	0	0	0	2615.87	1	1	48.2044	39.3929
DATA	1587	19	57	0	0	A_42_P801593	NM_001134744	11308.2	316	8.864966e+002	8.869385e+001	834.5	40	6.954467e+000	0	0	0	0	0	0	784.276	1	1	46.8651	38.7308
DATA	1588	19	58	0	0	A_42_P535743	NM_199393	11333.5	316.151	1.951877e+003	1.952079e+002	1778	39	6.369828e+000	0	0	0	0	0	0	1718.5	1	1	47.8731	38.6667
DATA	1589	19	59	0	0	A_64_P051890	ENSRNOT00000056631	11359.3	316.5	3.018966e+001	4.135776e+000	84	40	1.151992e+001	0	0	0	0	0	0	26.4506	1	1	57.5363	41.7692
DATA	1590	19	60	0	0	A_64_P098379	NM_001013890	11384.5	316.5	7.018270e+000	2.925654e+000	68.5	39	1.107952e+001	0	0	0	0	0	0	6.11986	1	0	57.5363	40.4545
DATA	1591	19	61	0	0	A_64_P144513	XR_086096	11409.9	316.5	3.804257e+004	3.804258e+003	32844.5	40	7.200257e+000	0	0	0	0	0	0	33015.8	1	1	56.9804	40.7429
DATA	1592	19	62	0	0	A_44_P325337	NM_001030041	11435	316.391	8.404057e+001	8.879624e+000	135	41.5	8.937392e+000	0	0	0	0	0	0	72.5989	1	1	46.8651	41.6071
DATA	1593	19	63	0	0	A_44_P142029	NM_001002851	11460.4	316.479	3.566291e+003	3.566407e+002	3080	40	7.025078e+000	0	0	0	0	0	0	3066.75	1	1	48.2044	41.4
DATA	1594	19	64	0	0	A_44_P292568	NM_001000207	11486.1	316.526	1.459828e+002	1.488218e+001	183.5	40	1.259544e+001	0	0	0	0	0	0	124.972	1	1	49.8279	44
DATA	1595	19	65	0	0	A_42_P624092	XR_007263	11511.2	316.247	3.365257e+003	3.365382e+002	2849	34.5	7.543423e+000	0	0	0	0	0	0	2868.56	1	1	48.2044	37.25
DATA	1596	19	66	0	0	A_42_P597322	NM_001103357	11536.7	316.343	2.815572e+002	2.830648e+001	310.5	40	7.617097e+000	0	0	0	1	0	0	239.005	1	1	47.5395	40.5429
DATA	1597	19	67	0	0	A_64_P034409	NM_001108146	11562.2	316.588	1.618085e+003	1.618350e+002	1447	39	7.370647e+000	0	0	0	0	0	0	1368.15	1	1	46.5243	41.5333
DATA	1598	19	68	0	0	A_64_P112797	NM_001001121	11587.7	316.778	4.146446e+002	4.156856e+001	419	42	1.109768e+001	0	0	0	0	0	0	349.292	1	1	47.5395	41.9615
DATA	1599	19	69	0	0	A_42_P761023	NM_001144870	11613.1	316.614	1.283653e+002	1.317126e+001	165	43	1.010810e+001	0	0	0	1	0	0	107.749	1	1	57.259	43.075
DATA	1600	19	70	0	0	A_42_P465408	NM_031647	11638	316.671	3.646271e+002	3.658266e+001	355	41	7.243284e+000	0	0	0	1	0	0	305.09	1	1	48.8603	40.7857
DATA	1601	19	71	0	0	A_64_P115761	NM_001109379	11663.9	316.689	1.792386e+001	3.468086e+000	74	40	7.918537e+000	0	0	0	0	0	0	14.9515	1	1	48.8603	41.3548
DATA	1602	19	72	0	0	A_64_P086487	A_64_P086487	11689.4	316.573	1.930539e+001	3.548253e+000	78	36	9.090161e+000	0	0	0	0	0	0	16.0602	1	1	57.5363	39.3
DATA	1603	19	73	0	0	A_42_P774028	NM_001017447	11714.1	316.5	1.300956e+003	1.301298e+002	1127	42	8.500377e+000	0	0	0	0	0	0	1079.77	1	1	47.8731	41.5556
DATA	1604	19	74	0	0	A_44_P233080	ENSRNOT00000026303	11739.7	316.662	2.037517e+003	2.037736e+002	1732	39.5	7.405316e+000	0	0	0	0	0	0	1687.74	1	1	48.5334	37.75
DATA	1605	19	75	0	0	A_64_P078002	ENSRNOT00000056206	11765.1	316.904	8.270050e+000	3.106745e+000	67	40	7.137184e+000	0	0	0	0	0	0	6.83954	1	0	46.8651	39.7576
DATA	1606	19	76	0	0	A_64_P047888	A_64_P047888	11790.6	316.931	1.174519e+001	3.220119e+000	71	38.5	1.012570e+001	0	0	0	0	0	0	9.70181	1	0	53.8203	42.4333
DATA	1607	19	77	0	0	A_44_P236001	NM_001000623	11816.3	316.866	6.883885e+001	7.509441e+000	115.5	42	9.080265e+000	0	0	0	0	0	0	56.8179	1	1	45.835	42.2683
DATA	1608	19	78	0	0	A_42_P819040	TC636720	11841.5	317	2.661545e+001	4.011546e+000	83	42	8.293468e+000	0	0	0	0	0	0	21.9618	1	1	54.1152	42.3333
DATA	1609	19	79	0	0	A_44_P168184	NM_001166675	11866.9	316.985	1.943696e+003	1.943927e+002	1710	38	7.981969e+000	0	0	0	0	0	0	1604.16	1	1	46.8651	40.6129
DATA	1610	19	80	0	0	A_64_P094925	NM_001024748	11891.9	316.896	2.147579e+002	2.168414e+001	237	43	7.890257e+000	0	0	0	0	0	0	177.367	1	1	46.8651	41.5517
DATA	1611	19	81	0	0	A_44_P332483	NM_173338	11917.5	317	5.200470e+000	3.039649e+000	63	39	7.633774e+000	0	0	0	0	0	0	4.30066	1	0	54.1152	38.7059
DATA	1612	19	82	0	0	A_42_P530071	NM_001107153	11943	316.797	3.852763e+003	3.852879e+002	3153	40	8.323720e+000	0	0	0	1	0	0	3192.02	1	1	46.8651	41.4412
DATA	1613	19	83	66	1	DarkCorner	DarkCorner	11967.9	317.173	2.992905e+000	2.981802e+000	57.5	37	8.679045e+000	0	0	0	0	0	0	-2.16499	0	0	49.8279	37.2973
DATA	1614	19	84	66	1	DarkCorner	DarkCorner	11994	317	2.983320e+000	2.972251e+000	59	40	9.884316e+000	0	0	0	0	0	0	-1.21053	0	0	54.9904	40.5405
DATA	1615	19	85	66	1	DarkCorner	DarkCorner	12019.9	316.971	2.971618e+000	2.960593e+000	56	38	9.859687e+000	0	0	0	0	0	0	-4.41096	0	0	46.8651	38.4898
DATA	1616	20	1	66	1	DarkCorner	DarkCorner	9899.13	322.357	2.711973e+000	2.701912e+000	58	38	6.312973e+000	0	0	0	0	0	0	-4.02926	0	0	46.8651	38.5435
DATA	1617	20	2	66	1	DarkCorner	DarkCorner	9924.42	322.573	2.702057e+000	2.692032e+000	59	45	6.085964e+000	0	0	0	0	0	0	-1.89416	0	0	57.5363	45.0909
DATA	1618	20	3	66	1	DarkCorner	DarkCorner	9949.5	322.475	2.692428e+000	2.682439e+000	55	41	8.412990e+000	0	0	0	0	0	0	-7.05084	0	0	50.4627	40.8182
DATA	1619	20	4	0	0	A_42_P787775	NM_001127566	9975.42	322.573	2.836828e+002	2.849389e+001	319	39.5	8.448647e+000	0	0	0	0	0	0	262.887	1	1	57.5363	40.25
DATA	1620	20	5	0	0	A_42_P607770	NM_001134616	10000.5	323	4.217848e+003	4.217932e+002	3818.5	42	9.327282e+000	0	0	0	0	0	0	3922.64	1	1	48.5334	40.7083
DATA	1621	20	6	0	0	A_42_P484738	NM_022266	10025.8	323.015	5.648961e+002	5.655191e+001	586	43	7.952909e+000	0	0	0	0	0	0	527.19	1	1	46.1809	41.9655
DATA	1622	20	7	0	0	A_64_P075273	NM_031743	10051.5	322.648	1.936598e+002	1.954574e+001	245	41.5	8.840679e+000	0	0	0	0	0	0	181.35	1	1	57.5363	41.375
DATA	1623	20	8	0	0	A_42_P674050	NM_001107225	10076.5	323.083	3.352173e+003	3.352277e+002	3121	44	6.879539e+000	0	0	0	0	0	0	3149.57	1	1	48.2044	44.6522
DATA	1624	20	9	1028	1	(+)E1A_r60_a107	E1A_r60_a107	10102	323.017	8.072121e+000	2.748651e+000	71	42	6.410219e+000	0	0	0	0	0	0	7.60883	1	0	44.0646	40.8182
DATA	1625	20	10	0	0	A_64_P144253	NM_201350	10127.5	322.648	1.528865e+001	3.032905e+000	74	43.5	1.185868e+001	0	0	0	0	0	0	14.4556	1	1	65	43.0357
DATA	1626	20	11	0	0	A_44_P791729	NM_181377	10152.7	322.943	5.087203e+003	5.087270e+002	4880	48.5	9.245789e+000	0	0	0	0	0	0	4824.48	1	1	46.8651	46.7308
DATA	1627	20	12	0	0	A_42_P550624	NM_001109319	10178.2	322.897	8.636279e+002	8.640204e+001	875	36.5	6.284903e+000	0	0	0	0	0	0	821.372	1	1	46.5243	37.25
DATA	1628	20	13	0	0	A_43_P11580	NM_012833	10203.5	322.863	7.761914e+001	8.184863e+000	138.5	39	5.706304e+000	0	0	0	0	0	0	74.0207	1	1	47.8731	39.4762
DATA	1629	20	14	0	0	A_44_P417055	XM_223442	10228.9	322.985	5.018254e+002	5.024935e+001	535	41	9.898816e+000	0	0	0	0	0	0	479.791	1	1	46.8651	41.8857
DATA	1630	20	15	0	0	A_64_P142867	A_64_P142867	10254.4	323.231	4.682434e+003	4.682505e+002	4571.5	41	1.125978e+001	0	0	0	0	0	0	4487.7	1	1	45.4864	43.3478
DATA	1631	20	16	0	0	A_64_P013002	XM_001072551	10279.6	323.213	1.792217e+001	3.140163e+000	78	40	9.376922e+000	0	0	0	0	0	0	17.2144	1	1	42.9674	40.52
DATA	1632	20	17	0	0	A_42_P457692	NM_001008363	10305.2	323	2.424844e+003	2.424980e+002	2419	42	1.021016e+001	0	0	0	0	0	0	2333.79	1	1	46.8651	40.7742
DATA	1633	20	18	0	0	A_42_P788480	NM_019194	10330.5	323	4.418177e+003	4.418252e+002	4160	42	9.453234e+000	0	0	0	0	0	0	4260.06	1	1	48.5334	40.3636
DATA	1634	20	19	0	0	A_42_P518462	NM_001007020	10356	323	2.819150e+003	2.819267e+002	2785	38.5	1.074746e+001	0	0	0	0	0	0	2722.74	1	1	46.8651	39.7857
DATA	1635	20	20	0	0	A_64_P007578	NM_001000851	10381.7	322.891	1.206583e+001	2.830696e+000	74	39	8.417040e+000	0	0	0	0	0	0	11.67	1	0	45.1352	40.4286
DATA	1636	20	21	0	0	A_64_P139350	NM_001191727	10406.5	323.159	4.646017e+001	5.303428e+000	108.5	40	7.023769e+000	0	0	0	0	0	0	44.9912	1	1	47.2035	39.8889
DATA	1637	20	22	0	0	A_64_P100442	ENSRNOT00000067861	10432.1	323.087	2.556531e+002	2.569266e+001	313	36	4.942900e+000	0	0	0	0	0	0	247.821	1	1	46.8651	36.1471
DATA	1638	20	23	1028	1	(+)E1A_r60_a135	E1A_r60_a135	10456.8	323.236	2.562400e+000	2.552900e+000	63	37.5	4.808322e+000	0	0	0	0	0	0	0.056606	0	0	41.0736	37.9063
DATA	1639	20	24	0	0	A_44_P459760	NM_001108187	10483.1	323.386	3.442713e+001	4.285038e+000	98	40	8.611945e+000	0	0	0	0	0	0	33.4194	1	1	57.259	41.0323
DATA	1640	20	25	0	0	A_64_P115536	NM_212545	10508.5	323.352	4.795519e+000	2.595145e+000	67	38.5	1.009008e+001	0	0	0	0	0	0	4.65675	1	0	65	40.375
DATA	1641	20	26	0	0	A_44_P538406	NM_013102	10533.4	322.71	1.244428e+004	1.244431e+003	11646	40	8.090084e+000	0	0	0	0	0	0	12084.8	1	1	46.8651	39.129
DATA	1642	20	27	0	0	A_64_P120871	NM_198743	10559	322.662	4.949593e+002	4.956160e+001	524	39	6.508115e+000	0	0	0	0	0	0	480.605	1	1	45.4864	38.9111
DATA	1643	20	28	0	0	A_44_P173048	NM_001009255	10584.4	323.137	6.349974e+002	6.355097e+001	685	39	6.899989e+000	0	0	0	0	0	0	616.407	1	1	48.5334	38.1212
DATA	1644	20	29	0	0	A_64_P058060	NM_001037541	10610	323.455	2.369065e+001	3.482651e+000	84	37	8.059966e+000	0	0	0	0	0	0	22.9847	1	1	55.8519	37.9655
DATA	1645	20	30	0	0	A_64_P145982	NM_001109366	10635.7	323.2	5.327686e+001	5.908607e+000	113	37.5	8.040917e+000	0	0	0	0	0	0	51.6456	1	1	46.8651	38.9722
DATA	1646	20	31	0	0	A_42_P514244	NM_012791	10660.5	323.718	1.173613e+002	1.201151e+001	186	38	8.892881e+000	0	0	0	0	0	0	113.66	1	1	47.8731	38.75
DATA	1648	20	33	0	0	A_64_P159155	XM_001071429	10711.6	323.21	1.305792e+001	2.877854e+000	75	37	9.053607e+000	0	0	0	0	0	0	12.6103	1	1	44.4243	37.0303
DATA	1649	20	34	0	0	A_64_P030272	ENSRNOT00000041731	10737	323.455	1.785515e+002	1.803900e+001	236	37.5	8.185030e+000	0	0	0	0	0	0	172.141	1	1	55.8519	38.5714
DATA	1650	20	35	0	0	A_42_P733076	NM_001033867	10762.5	323.5	1.992385e+002	2.008942e+001	264.5	40.5	7.959380e+000	0	0	0	0	0	0	191.712	1	1	57.5363	42.4
DATA	1651	20	36	0	0	A_44_P349475	NM_031333	10787.4	323.062	6.520409e+002	6.525509e+001	681.5	40	6.451873e+000	0	0	0	0	0	0	626.051	1	1	45.1352	39.72
DATA	1652	20	37	0	0	A_64_P009848	NM_001034135	10812.8	323.239	1.990015e+003	1.990183e+002	1990	40	9.110028e+000	0	0	0	0	0	0	1906.2	1	1	46.8651	41.2759
DATA	1653	20	38	0	0	A_64_P116685	NM_001166763	10838.6	323.409	3.940379e+003	3.940464e+002	3853	37	7.983411e+000	0	0	0	0	0	0	3764.6	1	1	52.9257	37.7879
DATA	1654	20	39	0	0	A_64_P072659	NM_001109296	10863.9	323.519	1.016066e+003	1.016399e+002	1032	38.5	8.934106e+000	0	0	0	0	0	0	968.052	1	1	50.4627	39.1944
DATA	1655	20	40	0	0	A_42_P808442	NM_001108759	10889.3	323.521	3.468413e+002	3.478199e+001	388	35	9.518524e+000	0	0	0	0	0	0	329.466	1	1	47.8731	36.8667
DATA	1656	20	41	0	0	A_64_P140836	NM_001017486	10914.4	323.278	7.577336e+001	8.016054e+000	132	39	7.512387e+000	0	0	0	0	0	0	71.7494	1	1	48.5334	39.6897
DATA	1657	20	42	0	0	A_64_P034384	NM_019227	10939.8	323.621	1.538628e+002	1.560847e+001	210	40	8.138602e+000	0	0	0	0	0	0	145.209	1	1	45.4864	41.9211
DATA	1658	20	43	0	0	A_42_P730411	NM_001012181	10965.3	323.373	4.034123e+002	4.042711e+001	443	41	9.591387e+000	0	0	0	0	0	0	379.362	1	1	46.1809	42.0714
DATA	1659	20	44	0	0	A_44_P396450	ENSRNOT00000018433	10990.7	323.214	8.478069e+001	8.880647e+000	144.5	39	7.789780e+000	0	0	0	0	0	0	79.4287	1	1	47.2035	40.7143
DATA	1660	20	45	0	0	A_44_P268610	NM_001109134	11016.1	323.613	2.987016e+003	2.987134e+002	2821.5	40	7.395860e+000	0	0	0	0	0	0	2787.77	1	1	49.1849	40.2941
DATA	1661	20	46	0	0	A_64_P059105	NM_001134544	11041.6	323.573	7.190543e+001	7.668305e+000	124.5	39	6.884040e+000	0	0	0	0	0	0	66.8388	1	1	57.5363	36.84
DATA	1662	20	47	0	0	A_42_P524851	NM_001130061	11067.1	323.56	5.114251e+002	5.121245e+001	534.5	42	1.017930e+001	0	0	0	0	0	0	473.404	1	1	48.8603	41.7586
DATA	1663	20	48	0	0	A_64_P141675	FM127585	11092.3	323.493	1.225632e+003	1.225927e+002	1191	42.5	9.848677e+000	0	0	0	0	0	0	1129.68	1	1	46.8651	44.2368
DATA	1664	20	49	0	0	A_64_P002979	ENSRNOT00000034762	11118	323.868	2.708913e+000	2.698862e+000	61.5	39	1.017554e+001	0	0	0	0	0	0	-1.63099	0	0	40.2912	39.3333
DATA	1665	20	50	0	0	A_44_P175822	NM_001109511	11143.4	323.573	1.215602e+002	1.245469e+001	174	40.5	8.939936e+000	0	0	0	0	0	0	111.044	1	1	57.5363	40.6765
DATA	1666	20	51	0	0	A_44_P1008751	NM_001137645	11168.6	323.573	1.093197e+002	1.126614e+001	160.5	41.5	7.432672e+000	0	0	0	0	0	0	99.4077	1	1	57.5363	40.7308
DATA	1667	20	52	0	0	A_44_P255350	NM_001007674	11194.1	323.614	1.937837e+002	1.957062e+001	235.5	38.5	7.620978e+000	0	0	0	0	0	0	175.387	1	1	57.259	39.7
DATA	1668	20	53	0	0	A_64_P017328	NM_012758	11219.4	323.742	8.591711e+002	8.596109e+001	859	43	9.015859e+000	0	0	0	0	0	0	773.956	1	1	46.1809	43
DATA	1669	20	54	0	0	A_64_P132571	NM_001107703	11244.6	324.032	3.842574e+003	3.842673e+002	3517	39	9.179284e+000	0	0	0	0	0	0	3445.15	1	1	44.0646	38.4815
DATA	1670	20	55	0	0	A_44_P107535	NM_001170336	11270.1	324	3.228319e+002	3.240231e+001	352	41	8.215838e+000	0	0	0	0	0	0	288.037	1	1	46.1809	40.75
DATA	1671	20	56	0	0	A_44_P353618	NM_053587	11295.4	324.159	7.189323e+002	7.194732e+001	716.5	41	8.611940e+000	0	0	0	0	0	0	638.368	1	1	47.2035	40.8
DATA	1672	20	57	0	0	A_44_P213336	A_44_P213336	11320.9	323.764	2.174293e+002	2.192286e+001	251	41	8.943425e+000	0	0	0	0	0	0	192.113	1	1	47.2035	40.1212
DATA	1673	20	58	0	0	A_42_P507072	FQ213070	11346.1	323.567	1.409776e+003	1.410058e+002	1296	39	5.098690e+000	0	0	0	0	0	0	1239.62	1	1	45.835	38.9429
DATA	1674	20	59	0	0	A_44_P428886	NM_001099516	11371.6	323.931	1.445773e+002	1.473212e+001	186	40	9.680796e+000	0	0	0	0	0	0	126.522	1	1	53.8203	41.303
DATA	1675	20	60	0	0	A_64_P086784	NM_001108657	11396.9	323.765	2.948236e+003	2.948373e+002	2511	39	6.688112e+000	0	0	0	0	0	0	2567.77	1	1	46.1809	38.7647
DATA	1676	20	61	0	0	A_42_P654682	NM_012724	11422.5	324	2.867614e+000	2.870506e+000	63	43	7.002035e+000	0	0	0	0	0	0	2.41329	0	0	54.1152	43.4815
DATA	1677	20	62	0	0	A_44_P443008	NM_001013068	11447.9	323.809	2.833153e+002	2.847655e+001	297	41	7.440260e+000	0	0	0	0	0	0	244.464	1	1	46.5243	41.5667
DATA	1678	20	63	0	0	A_64_P027229	A_64_P027229	11473.4	323.927	1.156420e+003	1.156780e+002	1057	40	8.139174e+000	0	0	0	0	0	0	993.363	1	1	49.8279	41.3846
DATA	1679	20	64	0	0	A_64_P134277	ENSRNOT00000029167	11498.9	324.145	6.759592e+001	7.353728e+000	115.5	38.5	1.829838e+001	0	0	0	0	0	0	57.8133	1	1	45.4864	45.6429
DATA	1680	20	65	0	0	A_64_P165548	XM_001055860	11524.3	323.875	6.896000e+001	7.484101e+000	121	37	9.877852e+000	0	0	0	0	0	0	58.7293	1	1	45.4864	38.3171
DATA	1681	20	66	0	0	A_64_P014737	NM_001000069	11550.1	324.173	7.278384e+000	3.009275e+000	65	39	8.037726e+000	0	0	0	0	0	0	6.17344	1	0	47.8731	41.4286
DATA	1682	20	67	0	0	A_42_P627330	NM_001106628	11574.7	323.754	3.487465e+002	3.499760e+001	359	42	9.508768e+000	0	0	0	0	0	0	294.682	1	1	45.1352	40.6
DATA	1683	20	68	0	0	A_64_P039452	NM_001109063	11600	324	2.111271e+002	2.131664e+001	243	42	1.117690e+001	0	0	0	0	0	0	177.76	1	1	46.8651	42.3611
DATA	1684	20	69	0	0	A_44_P516885	ENSRNOT00000005601	11625.6	324.427	2.629741e+004	2.629743e+003	21353	41	8.929714e+000	0	0	0	0	0	0	22067.4	1	1	57.5363	40.8387
DATA	1685	20	70	0	0	A_44_P839176	NM_001107114	11651	324.061	1.218117e+003	1.218476e+002	1078	37.5	5.814114e+000	0	0	0	0	0	0	1018.92	1	1	46.8651	38.1176
DATA	1686	20	71	0	0	A_64_P083342	AABR03026150	11676.5	324.352	2.402254e+001	3.819208e+000	81.5	42	1.052892e+001	0	0	0	0	0	0	20.0382	1	1	57.5363	41.5161
DATA	1687	20	72	0	0	A_42_P618185	NM_001108486	11701.7	324.187	1.363334e+003	1.363658e+002	1182	37	9.282778e+000	0	0	0	1	0	0	1134.35	1	1	49.5074	40.4783
DATA	1688	20	73	0	0	A_42_P619957	NM_053830	11727.4	324.427	1.290201e+002	1.324237e+001	171	41	8.053666e+000	0	0	0	0	0	0	107.118	1	1	57.5363	39.6923
DATA	1689	20	74	0	0	A_44_P375042	NM_001014243	11752.6	324.427	1.696817e+002	1.722931e+001	200.5	39	6.272454e+000	0	0	0	0	0	0	140.626	1	1	57.5363	38.0333
DATA	1690	20	75	0	0	A_44_P438053	NM_001004201	11778	324.061	8.136215e+001	8.669179e+000	130.5	40	7.758727e+000	0	0	0	0	0	0	67.3308	1	1	46.8651	39.7419
DATA	1691	20	76	0	0	A_43_P19181	ENSRNOT00000018440	11803.3	324.055	1.115482e+002	1.155008e+001	153	38	7.316730e+000	0	0	0	0	0	0	92.2205	1	1	48.8603	38.5135
DATA	1692	20	77	0	0	A_42_P664259	NM_024396	11828.8	324.484	1.797799e+004	1.797801e+003	14781	41	8.216299e+000	0	0	0	0	0	0	14856.3	1	1	53.2255	41.1515
DATA	1693	20	78	0	0	A_44_P588645	FQ230244	11854.5	324.494	6.334489e+001	7.007773e+000	114	41	7.020831e+000	0	0	0	0	0	0	52.3435	1	1	50.4627	41.2778
DATA	1694	20	79	0	0	A_64_P030844	XM_001065657	11879.7	324.153	2.407912e+001	3.843679e+000	78.5	41	9.962884e+000	0	0	0	0	0	0	19.9053	1	1	47.5395	40.9583
DATA	1695	20	80	0	0	A_64_P054823	A_64_P054823	11904.9	324.229	6.823078e+003	6.823143e+002	5665	40	6.652027e+000	0	0	0	0	0	0	5646.1	1	1	46.5243	39.129
DATA	1696	20	81	0	0	A_42_P516860	XM_001059330	11930.8	324.246	6.192308e+001	6.875554e+000	112	40	8.978369e+000	0	0	0	0	0	0	51.3247	1	1	45.1352	40
DATA	1697	20	82	0	0	A_64_P085772	NM_001191606	11955.9	324.5	7.255259e+001	7.843964e+000	119.5	40	8.297841e+000	0	0	0	0	0	0	60.2686	1	1	56.9804	42.3333
DATA	1698	20	83	66	1	DarkCorner	DarkCorner	11981.1	324.478	2.984160e+000	2.973088e+000	55	36	9.463190e+000	0	0	0	0	0	0	-3.86372	0	0	53.2255	38.0256
DATA	1699	20	84	66	1	DarkCorner	DarkCorner	12007.2	324.171	2.973602e+000	2.962570e+000	59	40.5	8.734395e+000	0	0	0	0	0	0	-1.5365	0	0	50.7771	41.2059
DATA	1700	20	85	66	1	DarkCorner	DarkCorner	12032.1	324.5	2.961131e+000	2.950145e+000	55.5	35	7.860509e+000	0	0	0	0	0	0	-4.95759	0	0	65	34.6772
DATA	1701	21	1	66	1	DarkCorner	DarkCorner	9885.92	329.787	2.713832e+000	2.703764e+000	59	35	8.095187e+000	0	0	0	0	0	0	-3.40002	0	0	44.7812	35.2652
DATA	1702	21	2	66	1	DarkCorner	DarkCorner	9911.5	330	2.703879e+000	2.693848e+000	58	41	8.644636e+000	0	0	0	0	0	0	-4.97307	0	0	54.1152	41.2162
DATA	1703	21	3	66	1	DarkCorner	DarkCorner	9936.3	329.803	2.694451e+000	2.684455e+000	55	45	8.873049e+000	0	0	0	0	0	0	-6.19346	0	0	44.4243	44.2105
DATA	1704	21	4	0	0	A_44_P277669	NM_001163736	9962.28	329.905	3.353344e+002	3.363993e+001	372	39	7.899367e+000	0	0	0	0	0	0	310.519	1	1	48.8603	40
DATA	1705	21	5	0	0	A_42_P788480	NM_019194	9987.86	329.974	4.524625e+003	4.524703e+002	4142.5	41.5	8.546403e+000	0	0	0	0	0	0	4204.85	1	1	48.5334	40.8214
DATA	1706	21	6	0	0	A_42_P558354	NM_001007686	10013.1	330.104	1.246997e+003	1.247280e+002	1206	37.5	8.297914e+000	0	0	0	0	0	0	1162.92	1	1	46.8651	39.1538
DATA	1707	21	7	0	0	A_44_P714409	NM_001047907	10038.4	330.027	1.727598e+003	1.727800e+002	1649	40	8.277663e+000	0	0	0	0	0	0	1616.64	1	1	48.5334	41.3448
DATA	1708	21	8	0	0	A_42_P604331	NM_001108533	10064.1	330.065	6.150970e+004	6.150971e+003	58979	40	8.911954e+000	0	0	0	0	0	0	57754.6	1	1	54.4085	42.1739
DATA	1709	21	9	0	0	A_64_P139472	NM_173119	10089.3	329.9	1.987473e+003	1.987647e+002	1933	43	7.078727e+000	0	0	0	0	0	0	1872.14	1	1	47.2035	41.5862
DATA	1710	21	10	0	0	A_42_P711589	NM_022948	10114.6	329.9	2.822620e+003	2.822742e+002	2691	41	9.805881e+000	0	0	0	1	0	0	2667.19	1	1	47.5395	42.0303
DATA	1711	21	11	0	0	A_42_P813567	NM_031841	10140.4	330.427	4.370197e+004	4.370198e+003	41391	49	1.231114e+001	0	0	0	0	0	0	41426.1	1	1	57.5363	45.5556
DATA	1712	21	12	0	0	A_42_P647505	TC640289	10165.4	329.886	1.174117e+003	1.174406e+002	1142	41	9.554760e+000	0	0	0	0	0	0	1116.07	1	1	46.8651	42.2963
DATA	1713	21	13	0	0	A_64_P094313	NM_032073	10191	329.774	5.093062e+002	5.099685e+001	552	36	5.200180e+000	0	0	0	0	0	0	485.476	1	1	45.4864	36.4483
DATA	1714	21	14	0	0	A_42_P577421	NM_001106819	10216.1	330.104	2.970196e+002	2.981479e+001	342	41	7.885266e+000	0	0	0	0	0	0	283.866	1	1	46.8651	41.125
DATA	1715	21	15	0	0	A_42_P477311	NM_001013170	10241.7	330.296	5.339516e+003	5.339578e+002	5132	47	9.834342e+000	0	0	0	0	0	0	5115.82	1	1	48.2044	46
DATA	1716	21	16	0	0	A_42_P630249	NM_031824	10267	330.384	1.208112e+003	1.208387e+002	1190	37	6.929629e+000	0	0	0	1	0	0	1160.15	1	1	48.8603	36.7391
DATA	1717	21	17	0	0	A_42_P618256	NM_001024759	10292.3	329.746	2.470715e+002	2.484084e+001	297.5	39	1.022927e+001	0	0	0	0	0	0	237.744	1	1	45.835	39.931
DATA	1718	21	18	0	0	A_64_P101584	A_64_P101584	10318	329.828	2.732368e+002	2.744417e+001	325	42	8.768631e+000	0	0	0	0	0	0	263.436	1	1	45.4864	40.4444
DATA	1719	21	19	0	0	A_64_P045461	NM_001106750	10343.3	330	7.945697e+001	8.349236e+000	138	38	8.436102e+000	0	0	0	0	0	0	76.741	1	1	45.4864	36.9333
DATA	1720	21	20	0	0	A_64_P056485	ENSRNOT00000033663	10368.8	330.125	7.307201e+002	7.311685e+001	767	39	7.805360e+000	0	0	0	0	0	0	706.837	1	1	47.5395	40.931
DATA	1721	21	21	0	0	A_64_P013077	A_64_P013077	10394	330.229	8.369071e+001	8.750958e+000	144.5	43	8.259641e+000	0	0	0	0	0	0	81.0629	1	1	46.8651	42.6897
DATA	1722	21	22	0	0	A_44_P348952	NM_001000368	10419.4	330.314	7.119160e+000	2.651416e+000	69	41	9.624910e+000	0	0	0	0	0	0	6.90341	1	0	47.5395	41.75
DATA	1723	21	23	0	0	A_64_P147609	NM_001106295	10444.9	330.473	2.219103e+003	2.219250e+002	2218	37.5	8.348044e+000	0	0	0	0	0	0	2153.84	1	1	53.8203	40.3529
DATA	1724	21	24	0	0	A_44_P193928	NM_183328	10470	330.423	3.488807e+002	3.498113e+001	387	41	8.011628e+000	0	0	0	0	0	0	338.846	1	1	47.8731	42.3784
DATA	1725	21	25	0	0	A_44_P441947	XM_001079870	10495.5	329.727	6.543174e+002	6.548137e+001	688	39	7.683718e+000	0	0	0	0	0	0	635.743	1	1	46.5243	40.3043
DATA	1726	21	26	0	0	A_42_P666259	NM_001009661	10520.9	330.243	5.305418e+003	5.305479e+002	5091.5	38	1.006112e+001	0	0	0	0	0	0	5156.32	1	1	48.2044	39.8846
DATA	1727	21	27	0	0	A_64_P082486	A_64_P082486	10546.2	330.116	5.423480e+002	5.429463e+001	605	38.5	5.931014e+000	0	0	0	0	0	0	527.103	1	1	46.5243	37.95
DATA	1728	21	28	0	0	A_64_P091940	NM_033237	10571.9	330.5	8.305631e+001	8.687899e+000	143.5	38	5.742075e+000	0	0	0	0	0	0	80.7071	1	1	56.9804	38.3333
DATA	1729	21	29	0	0	A_64_P144899	NM_001107736	10597	330.271	4.512721e+002	4.519920e+001	502	39	9.272850e+000	0	0	0	0	0	0	438.3	1	1	46.8651	38.7037
DATA	1730	21	30	0	0	A_44_P410062	XM_224553	10622.5	330.62	2.554901e+002	2.567611e+001	312	37	7.787241e+000	0	0	0	0	0	0	247.986	1	1	47.8731	38.4375
DATA	1731	21	31	0	0	A_42_P489764	NM_001004099	10647.8	330.639	1.097861e+003	1.098158e+002	1120	42	9.383960e+000	0	0	0	0	0	0	1064.65	1	1	47.8731	40.0606
DATA	1732	21	32	0	0	A_42_P640277	NM_001003401	10673.4	330.743	1.204804e+004	1.204807e+003	11358.5	36	8.734169e+000	0	0	0	0	0	0	11670.3	1	1	48.5334	36.7143
DATA	1733	21	33	0	0	A_44_P212850	NM_019305	10698.9	330.671	2.776170e+001	3.776597e+000	89	39.5	7.882606e+000	0	0	0	0	0	0	26.8538	1	1	48.8603	39.4706
DATA	1734	21	34	0	0	A_64_P125506	NM_021677	10724.4	330.392	2.090481e+002	2.106153e+001	269.5	37	8.934152e+000	0	0	0	0	0	0	201.88	1	1	49.1849	37.6176
DATA	1735	21	35	0	0	A_42_P802358	NM_001024341	10749.5	330.589	7.300149e+003	7.300194e+002	7022	38	7.736766e+000	0	0	0	0	0	0	7037.32	1	1	48.5334	40.3704
DATA	1736	21	36	0	0	A_44_P552852	XM_346367	10775.1	330.5	1.358400e+001	2.910869e+000	76.5	40	7.480938e+000	0	0	0	0	0	0	13.0678	1	1	56.9804	41.3478
DATA	1738	21	38	0	0	A_64_P141187	NM_001108899	10825.9	330.523	1.213959e+001	2.857394e+000	74	40	9.578903e+000	0	0	0	0	0	0	11.6231	1	0	65	40.3462
DATA	1739	21	39	0	0	A_44_P274823	NM_001105831	10850.9	330.648	1.240441e+003	1.240712e+002	1255	38	8.138602e+000	0	0	0	0	0	0	1184.56	1	1	47.8731	38.9211
DATA	1740	21	40	0	0	A_42_P804913	ENSRNOT00000022886	10876.3	330.812	4.730814e+001	5.398645e+000	106	37	9.337058e+000	0	0	0	0	0	0	45.0479	1	1	46.8651	38.7742
DATA	1741	21	41	0	0	A_64_P113970	NM_212501	10901.9	330.417	1.234307e+003	1.234583e+002	1240.5	38.5	6.129047e+000	0	0	0	0	0	0	1171.64	1	1	48.2044	38.5
DATA	1742	21	42	1028	1	(+)E1A_r60_3	E1A_r60_3	10927.3	330.259	2.625370e+001	3.707411e+000	86	39	8.119704e+000	0	0	0	0	0	0	24.8391	1	1	42.2201	40.5526
DATA	1743	21	43	0	0	A_42_P661992	TC596141	10952.7	330.761	1.321302e+002	1.347155e+001	188.5	44	8.537959e+000	0	0	0	0	0	0	124.588	1	1	47.2035	43.125
DATA	1744	21	44	0	0	A_42_P577431	NM_001109422	10978.4	330.573	8.853739e+001	9.237889e+000	144	39	8.830581e+000	0	0	0	0	0	0	83.1767	1	1	57.5363	40.6667
DATA	1745	21	45	0	0	A_44_P524785	NM_001000184	11003.5	331	4.860417e+000	2.690261e+000	68	40.5	8.710477e+000	0	0	0	0	0	0	4.54936	1	0	54.1152	42.3
DATA	1746	21	46	0	0	A_64_P027634	NM_001000223	11029	331	3.600322e+001	4.474276e+000	93	38	7.167768e+000	0	0	0	0	0	0	33.5661	1	1	54.9904	37.2424
DATA	1747	21	47	0	0	A_42_P492976	NM_001126099	11054.1	330.896	1.727647e+002	1.748115e+001	221	36	8.369256e+000	0	0	0	0	0	0	160.42	1	1	46.8651	37.1111
DATA	1748	21	48	0	0	A_64_P157479	AABR03127998	11079.8	330.87	3.292464e+003	3.292573e+002	3126.5	40	1.030400e+001	0	0	0	0	0	0	3044.17	1	1	46.5243	42.1212
DATA	1749	21	49	0	0	A_44_P391706	NM_001007796	11105.4	330.697	1.098616e+002	1.131080e+001	165	39.5	9.317802e+000	0	0	0	0	0	0	101.131	1	1	45.835	40.5833
DATA	1750	21	50	0	0	A_44_P184685	NM_001007735	11130.2	330.892	7.415456e+001	7.892422e+000	126	36.5	7.670574e+000	0	0	0	0	0	0	67.9675	1	1	45.835	36.4688
DATA	1751	21	51	0	0	A_44_P475275	NM_001000893	11156	331	4.761282e+001	5.480753e+000	107.5	40	7.136518e+000	0	0	0	0	0	0	43.4399	1	1	54.9904	39.9667
DATA	1752	21	52	0	0	A_44_P270056	NM_001007800	11181	331	1.515971e+002	1.540303e+001	201	37.5	8.731565e+000	0	0	0	0	0	0	137.682	1	1	46.8651	37.9667
DATA	1753	21	53	0	0	A_64_P059351	NM_001145175	11206.7	331.132	7.992843e+001	8.449424e+000	136	42	9.900790e+000	0	0	0	0	0	0	72.2481	1	1	45.835	42.1111
DATA	1754	21	54	0	0	A_42_P573441	NM_001105742	11232.2	331	3.106089e+003	3.106211e+002	2802	43.5	1.027837e+001	0	0	0	0	0	0	2794.19	1	1	46.8651	43.4167
DATA	1755	21	55	0	0	A_42_P485589	NM_017246	11257.5	331	1.018407e+002	1.055309e+001	153	41	8.723179e+000	0	0	0	0	0	0	91.1765	1	1	54.1152	40.4231
DATA	1756	21	56	0	0	A_44_P149540	XM_223051	11282.6	331.13	7.467671e+003	7.467722e+002	6548	40.5	8.226411e+000	0	0	0	0	0	0	6653.93	1	1	46.8651	41.9231
DATA	1757	21	57	0	0	A_44_P323236	NM_001000513	11308.3	331.109	1.777853e+001	3.310979e+000	76	41	9.693699e+000	0	0	0	0	0	0	15.7639	1	1	42.2201	39.303
DATA	1759	21	59	0	0	A_64_P100447	NM_001173469	11359.4	331.427	1.063092e+001	3.014017e+000	70.5	42	8.480528e+000	0	0	0	0	0	0	9.33554	1	0	65	41.875
DATA	1760	21	60	0	0	A_64_P150008	A_64_P150008	11384.5	330.969	6.775742e+001	7.344479e+000	121	38	7.266017e+000	0	0	0	0	0	0	59.2168	1	1	44.4243	38.5882
DATA	1761	21	61	0	0	A_42_P481696	NM_022508	11410	330.742	8.391797e+002	8.396626e+001	790	40.5	7.849975e+000	0	0	0	0	0	0	729.923	1	1	45.835	39.8824
DATA	1762	21	62	0	0	A_64_P033755	AABR03073220	11435.4	330.806	6.438729e+001	7.045589e+000	119.5	41	7.422286e+000	0	0	0	0	0	0	55.745	1	1	46.5243	42.0968
DATA	1763	21	63	0	0	A_64_P115980	NM_001109458	11460.7	330.971	1.992110e+002	2.012727e+001	228	44	8.904633e+000	0	0	0	0	0	0	171.699	1	1	46.1809	43.7391
DATA	1764	21	64	0	0	A_64_P001426	NM_001126301	11485.4	331.02	1.002695e+002	1.043398e+001	145	42.5	2.580872e+001	0	0	0	0	1	0	86.0519	1	1	65	53.6429
DATA	1765	21	65	0	0	A_64_P012987	NM_001108668	11511.1	331.029	5.961420e+002	5.968462e+001	586	37.5	1.125999e+001	0	0	0	0	0	0	509.398	1	1	46.8651	39.8889
DATA	1767	21	67	0	0	A_42_P668289	TC585832	11561.9	330.825	1.333291e+003	1.333611e+002	1173	43.5	1.174362e+001	0	0	0	0	0	0	1130.1	1	1	45.4864	45.4667
DATA	1768	21	68	0	0	A_64_P052690	ENSRNOT00000036634	11587.6	330.968	3.529866e+002	3.542030e+001	364	41	1.020275e+001	0	0	0	0	0	0	298.073	1	1	44.0646	42.1034
DATA	1769	21	69	0	0	A_42_P593020	NM_013413	11613.1	331.5	3.233187e+001	4.372037e+000	88	41	9.597149e+000	0	0	0	0	0	0	27.2086	1	1	65	41
DATA	1770	21	70	0	0	A_64_P037303	NM_001127530	11637.9	331.211	4.002131e+002	4.013007e+001	400	41	7.679191e+000	0	0	0	0	0	0	335.712	1	1	46.8651	40.5946
DATA	1771	21	71	0	0	A_44_P684180	NM_001037363	11663.6	331.127	3.740299e+003	3.740416e+002	3182	38	6.580696e+000	0	0	0	0	0	0	3128	1	1	47.5395	38.75
DATA	1772	21	72	0	0	A_64_P104743	NM_133518	11689.3	331.5	1.371400e+002	1.403176e+001	181.5	44	1.108598e+001	0	0	0	0	0	0	114.388	1	1	57.5363	42.5517
DATA	1773	21	73	0	0	A_44_P941132	NM_001108128	11714.5	330.813	3.182525e+003	3.182664e+002	2633.5	41	8.989393e+000	0	0	0	0	0	0	2648.09	1	1	44.4243	41.4667
DATA	1774	21	74	0	0	A_44_P187080	NM_001110823	11739.7	331.222	1.254592e+004	1.254595e+003	10133	36	7.393959e+000	0	0	0	0	0	0	10419.3	1	1	47.5395	37.6786
DATA	1775	21	75	0	0	A_42_P574960	ENSRNOT00000068719	11765.3	331.3	3.286696e+002	3.300240e+001	328	37	5.166728e+000	0	0	0	0	0	0	272.522	1	1	47.2035	37.4848
DATA	1776	21	76	0	0	A_64_P094850	A_64_P094850	11790.6	331.087	5.437553e+001	6.205688e+000	105	36	1.006371e+001	0	0	0	0	0	0	45.0311	1	1	46.5243	38.2759
DATA	1777	21	77	0	0	A_43_P13418	NM_172042	11816.2	331.182	2.281288e+003	2.281484e+002	1931	38	6.413796e+000	0	0	0	0	0	0	1887.85	1	1	45.835	37.6333
DATA	1778	21	78	66	-1	(-)3xSLv1	NegativeControl	11841.6	331.573	3.004564e+000	2.993417e+000	56.5	44	8.495013e+000	0	0	0	0	0	0	-2.3471	0	0	65	44.3704
DATA	1779	21	79	0	0	A_44_P321594	ENSRNOT00000006966	11867	331.545	3.876677e+001	4.897487e+000	91	37	7.178752e+000	0	0	0	0	0	0	32.0811	1	1	55.8519	37.9655
DATA	1780	21	80	0	0	A_44_P792531	NM_001025700	11892.4	331.573	9.704901e+001	1.015522e+001	141	39.5	9.322769e+000	0	0	0	0	0	0	80.3724	1	1	57.5363	40.3929
DATA	1781	21	81	0	0	A_43_P14795	NM_001044248	11917.5	331.164	5.744424e+002	5.752184e+001	538.5	41	8.908931e+000	0	0	0	0	0	0	476.308	1	1	48.2044	40.4643
DATA	1782	21	82	0	0	A_42_P671502	NM_053467	11942.9	331.353	2.870089e+003	2.870243e+002	2383	39	8.110905e+000	0	0	0	0	0	0	2384.35	1	1	46.1809	40.1351
DATA	1783	21	83	66	1	DarkCorner	DarkCorner	11967.7	331.347	2.985003e+000	2.973929e+000	56	36.5	8.101724e+000	0	0	0	0	0	0	-4.09225	0	0	48.5334	38.5
DATA	1784	21	84	66	1	DarkCorner	DarkCorner	11994.2	331.278	2.975215e+000	2.964177e+000	56	41	9.886746e+000	0	0	0	0	0	0	-2.819	0	0	47.5395	40.4054
DATA	1785	21	85	66	1	DarkCorner	DarkCorner	12019.4	331.573	2.963674e+000	2.952678e+000	59	37	8.117197e+000	0	0	0	0	0	0	-1.53788	0	0	57.5363	36.4444
DATA	1786	22	1	66	1	DarkCorner	DarkCorner	9898.92	337.197	2.705605e+000	2.695568e+000	60.5	36	8.688976e+000	0	0	0	0	0	0	-2.13016	0	0	46.8651	37.4
DATA	1787	22	2	66	1	DarkCorner	DarkCorner	9924.55	337.233	2.695825e+000	2.685823e+000	61	44	6.013873e+000	0	0	0	0	0	0	-2.85725	0	0	48.8603	43.0833
DATA	1788	22	3	66	1	DarkCorner	DarkCorner	9949.37	337.2	2.686444e+000	2.676477e+000	57	39.5	8.231272e+000	0	0	0	0	0	0	-3.04083	0	0	45.4864	39.9231
DATA	1789	22	4	0	0	A_42_P704824	NM_001009640	9975.06	337.171	9.878547e+001	1.023221e+001	154	41	8.076458e+000	0	0	0	0	0	0	91.738	1	1	46.8651	40.6667
DATA	1790	22	5	0	0	A_42_P517554	NM_001107060	10000.2	337.514	5.852998e+001	6.428069e+000	116	39	7.800577e+000	0	0	0	0	0	0	54.5462	1	1	47.2035	39.8148
DATA	1791	22	6	0	0	A_42_P586883	NM_001106416	10026	337.455	2.867230e+001	3.903134e+000	90	38	8.273943e+000	0	0	0	0	0	0	26.814	1	1	55.8519	39.3793
DATA	1792	22	7	0	0	A_64_P060302	BF559343	10051.5	337.5	1.962296e+002	1.979966e+001	245	40	7.826647e+000	0	0	0	0	0	0	184.135	1	1	57.5363	40.1111
DATA	1793	22	8	0	0	A_64_P055418	NM_001025641	10076.7	337.5	7.676322e+000	2.740453e+000	69	38.5	9.317954e+000	0	0	0	0	0	0	7.22668	1	0	57.5363	42.0417
DATA	1794	22	9	0	0	A_44_P317600	NM_012612	10101.9	337.232	3.076160e+002	3.087319e+001	353.5	41	9.055176e+000	0	0	0	0	0	0	290.507	1	1	46.5243	40.6061
DATA	1795	22	10	0	0	A_44_P433359	NM_022710	10127.6	337.157	1.912130e+002	1.929920e+001	247	46	1.061066e+001	0	0	0	0	0	0	181.138	1	1	47.5395	44.1154
DATA	1796	22	11	0	0	A_42_P788480	NM_019194	10152.6	337.164	4.394001e+003	4.394078e+002	4106	42.5	1.118029e+001	0	0	0	0	0	0	4174.65	1	1	48.5334	42.6333
DATA	1797	22	12	0	0	A_44_P269808	NM_001025281	10178.5	337.5	5.185531e+001	5.800477e+000	109.5	39	7.515307e+000	0	0	0	0	0	0	49.4105	1	1	57.5363	40.1875
DATA	1798	22	13	0	0	A_64_P108165	NM_001108889	10203.7	337.5	1.171173e+001	2.844594e+000	75	41	8.827856e+000	0	0	0	0	0	0	11.1892	1	0	57.5363	42
DATA	1799	22	14	0	0	A_42_P581567	NM_001011899	10229.3	337.5	7.210160e+001	7.659786e+000	129.5	41	7.814241e+000	0	0	0	0	0	0	69.0605	1	1	57.5363	42.0645
DATA	1800	22	15	0	0	A_42_P746029	NM_144748	10254.5	337.5	1.233432e+001	2.859386e+000	75	37.5	7.908158e+000	0	0	0	0	0	0	11.8417	1	0	57.5363	38.5909
DATA	1801	22	16	0	0	A_42_P481087	XM_232226	10279.6	337.91	3.904080e+002	3.912556e+001	435	41.5	8.912864e+000	0	0	0	0	0	0	375.646	1	1	46.1809	40.4286
DATA	1802	22	17	0	0	A_64_P031020	ENSRNOT00000032728	10305	337.781	6.605825e+000	2.652435e+000	70	42	1.123843e+001	0	0	0	0	0	0	6.36871	1	0	45.4864	41.5349
DATA	1803	22	18	0	0	A_44_P344228	NM_183051	10330.8	337.63	3.512761e+001	4.349067e+000	97	41	9.091048e+000	0	0	0	0	0	0	33.9288	1	1	48.5334	39.2703
DATA	1804	22	19	0	0	A_64_P009798	NM_021742	10356.4	337.573	2.569520e+000	2.559987e+000	61	35	7.883074e+000	0	0	0	0	0	0	-0.887223	0	0	57.5363	35.9286
DATA	1805	22	20	0	0	A_44_P775747	ENSRNOT00000051510	10381.4	337.742	9.983777e+003	9.983810e+002	9745.5	43	7.882762e+000	0	0	0	0	0	0	9672.45	1	1	46.1809	42.069
DATA	1806	22	21	0	0	A_44_P349475	NM_031333	10406.5	337.849	6.500880e+002	6.505893e+001	711	41.5	9.822229e+000	0	0	0	0	0	0	630.583	1	1	47.8731	41.4286
DATA	1807	22	22	0	0	A_64_P114198	NM_001080153	10432	337.94	1.122595e+003	1.122885e+002	1100.5	39	7.708459e+000	0	0	0	0	0	0	1090.02	1	1	46.8651	40.6579
DATA	1808	22	23	0	0	A_42_P719060	NM_001108994	10457.4	338	1.315459e+003	1.315705e+002	1286	39.5	8.656004e+000	0	0	0	0	0	0	1278.31	1	1	48.5334	40.9063
DATA	1809	22	24	0	0	A_44_P163243	NM_175759	10483.1	337.614	2.556748e+000	2.547544e+000	63	40	8.220614e+000	0	0	0	0	0	0	0.367825	0	0	65	40.6129
DATA	1810	22	25	0	0	A_44_P156864	A_44_P156864	10508.4	337.424	1.113488e+002	1.142234e+001	169	37	7.504604e+000	0	0	0	0	0	0	108.297	1	1	45.1352	38.3704
DATA	1811	22	26	0	0	A_42_P758052	NM_001031645	10533.6	337.729	1.650834e+003	1.651031e+002	1705	40	6.763288e+000	0	0	0	0	0	0	1605.84	1	1	47.5395	39.4722
DATA	1812	22	27	0	0	A_44_P280659	NM_001100971	10559.1	338.057	4.541049e+001	5.206190e+000	109	37	6.269833e+000	0	0	0	0	0	0	44.1696	1	1	46.8651	36.4595
DATA	1813	22	28	0	0	A_42_P768380	NM_001100158	10584.6	337.829	2.575176e+003	2.575302e+002	2569	40	9.122257e+000	0	0	0	0	0	0	2503.89	1	1	49.8279	40.2083
DATA	1814	22	29	0	0	A_44_P486312	NM_144737	10609.7	337.971	2.499331e+002	2.512291e+001	304.5	34	8.711269e+000	0	0	0	0	0	0	242.883	1	1	46.1809	36.9
DATA	1815	22	30	0	0	A_64_P005288	XM_575125	10634.9	338.041	5.905535e+001	6.432772e+000	120	39.5	7.550956e+000	0	0	0	0	0	0	57.3447	1	1	46.8651	39.2059
DATA	1816	22	31	0	0	A_64_P101885	ENSRNOT00000058341	10660.6	337.986	1.461374e+002	1.483510e+001	206	35	9.907405e+000	0	0	0	0	0	0	141.757	1	1	47.2035	36.64
DATA	1817	22	32	0	0	A_64_P113645	ENSRNOT00000055538	10685.6	338	2.565850e+000	2.556331e+000	57	40	6.931210e+000	0	0	0	0	0	0	-3.28398	0	0	45.835	39.3333
DATA	1818	22	33	0	0	A_42_P588869	NM_001008348	10711.2	337.882	1.089950e+003	1.090251e+002	1086.5	39	9.324028e+000	0	0	0	1	0	0	1054.39	1	1	46.5243	38
DATA	1819	22	34	0	0	A_64_P028027	NM_001000473	10737	338	2.591212e+001	3.645743e+000	88	38	8.866291e+000	0	0	0	0	0	0	25.0237	1	1	54.9904	40
DATA	1820	22	35	0	0	A_42_P468805	NM_145721	10762.2	337.806	1.940586e+002	1.957524e+001	252	39	7.859928e+000	0	0	0	0	0	0	187.043	1	1	47.5395	40.4615
DATA	1821	22	36	0	0	A_42_P522194	NM_012914	10787.3	338.043	7.272261e+001	7.714663e+000	135	39	7.864233e+000	0	0	0	0	0	0	69.9471	1	1	46.1809	39.3333
DATA	1822	22	37	0	0	A_64_P002969	A_64_P002969	10813.4	338.069	2.590776e+000	2.594082e+000	65.5	40	6.977621e+000	0	0	0	0	0	0	2.48088	0	0	53.8203	39.5172
DATA	1823	22	38	0	0	A_42_P453935	NM_001198580	10838.1	338.104	1.770669e+003	1.770858e+002	1758	41.5	9.741781e+000	0	0	0	0	0	0	1694.74	1	1	46.8651	41.1667
DATA	1824	22	39	0	0	A_42_P523551	NM_001014087	10863.9	338.386	2.604483e+000	2.594820e+000	63	41	9.301192e+000	0	0	0	0	0	0	-0.706619	0	0	57.259	40.525
DATA	1825	22	40	0	0	A_64_P046076	NM_053952	10889.5	338.352	8.607150e+002	8.611084e+001	854	37.5	6.405767e+000	0	0	0	0	0	0	819.059	1	1	57.5363	37.0769
DATA	1826	22	41	0	0	A_42_P607770	NM_001134616	10914.4	338	4.308187e+003	4.308266e+002	3982	36.5	6.590337e+000	0	0	0	0	0	0	4086.83	1	1	48.5334	36.8929
DATA	1827	22	42	0	0	A_64_P089400	NM_022605	10940.2	338.031	1.425571e+002	1.449441e+001	199.5	40	6.089388e+000	0	0	0	0	0	0	134.774	1	1	45.835	41.875
DATA	1828	22	43	0	0	A_64_P072064	FQ221714	10965.5	338.352	6.187752e+004	6.187752e+003	57419.5	41	7.258715e+000	0	0	0	0	0	0	58296.6	1	1	57.5363	42.0882
DATA	1829	22	44	0	0	A_42_P555125	NM_012913	10991	338.455	2.857624e+003	2.857745e+002	2784	42	9.113710e+000	0	0	0	0	0	0	2682.33	1	1	55.8519	43.0294
DATA	1830	22	45	0	0	A_42_P768776	NM_001108443	11016	338.3	2.370064e+003	2.370212e+002	2284	39	7.432780e+000	0	0	0	1	0	0	2216.24	1	1	46.5243	38.9394
DATA	1831	22	46	0	0	A_42_P593930	NM_001195606	11041.7	338.066	1.766555e+001	3.192654e+000	78	39	9.125411e+000	0	0	0	0	0	0	16.4517	1	1	44.0646	38.8387
DATA	1832	22	47	0	0	A_64_P013545	NM_001115046	11067.3	338.382	1.239118e+002	1.267566e+001	177	39	1.033866e+001	0	0	0	0	0	0	114.922	1	1	49.5074	40.4872
DATA	1833	22	48	0	0	A_42_P548520	NM_001100834	11092.3	338.338	1.816863e+003	1.817061e+002	1718.5	39	9.054758e+000	0	0	0	0	0	0	1677.97	1	1	48.5334	40.3636
DATA	1834	22	49	0	0	A_42_P692317	NM_001107565	11117.6	337.986	4.323821e+002	4.332202e+001	473	41	1.077902e+001	0	0	0	0	0	0	397.569	1	1	47.2035	42.4828
DATA	1835	22	50	0	0	A_64_P078303	NM_001106526	11143.2	338.077	3.640739e+001	4.536041e+000	95	40	8.517163e+000	0	0	0	0	0	0	33.3256	1	1	45.835	38.9722
DATA	1836	22	51	0	0	A_64_P031771	A_64_P031771	11168.7	338.186	3.112789e+001	4.132490e+000	93	40	8.034924e+000	0	0	0	0	0	0	28.3629	1	1	43.3362	39.32
DATA	1837	22	52	0	0	A_44_P393929	NM_001039713	11193.7	338.076	7.110353e+001	7.616649e+000	125	40	7.496168e+000	0	0	0	0	0	0	64.4906	1	1	45.835	39.4688
DATA	1838	22	53	0	0	A_44_P135730	XM_228802	11219.3	338.269	9.492141e+001	9.880690e+000	151.5	42	1.065793e+001	0	0	0	0	0	0	85.6859	1	1	46.1809	41.4839
DATA	1839	22	54	0	0	A_43_P23215	NM_001025737	11244.5	338.301	1.098390e+002	1.132452e+001	160	42.5	7.646015e+000	0	0	0	0	0	0	98.685	1	1	48.5334	43.6923
DATA	1840	22	55	0	0	A_64_P118427	A_64_P118427	11270.3	338.5	6.045496e+001	6.649892e+000	115	41	8.016515e+000	0	0	0	0	0	0	54.0522	1	1	57.5363	41.7419
DATA	1841	22	56	0	0	A_64_P075560	NM_001037526	11295.8	338.375	2.077101e+001	3.473080e+000	79	40	9.798617e+000	0	0	0	0	0	0	18.4812	1	1	45.1352	39.2903
DATA	1842	22	57	0	0	A_64_P150311	NM_177935	11321.1	338.5	3.861165e+001	4.767722e+000	96	40	7.173273e+000	0	0	0	0	0	0	34.1907	1	1	56.9804	38.9259
DATA	1843	22	58	0	0	A_44_P272393	NM_001106892	11346.5	338.5	3.231627e+001	4.282718e+000	87.5	40	8.153683e+000	0	0	0	0	0	0	28.4787	1	1	57.5363	39.5556
DATA	1844	22	59	0	0	A_44_P421887	NM_001191565	11370.8	338.318	1.452823e+002	1.480003e+001	191	40	9.974047e+000	0	0	0	0	0	0	127.441	1	1	45.4864	41.3667
DATA	1845	22	60	0	0	A_64_P045102	A_64_P045102	11397.4	338.573	9.361081e+002	9.365380e+001	896	41	8.379870e+000	0	0	0	0	0	0	817.122	1	1	57.5363	42
DATA	1846	22	61	0	0	A_42_P818546	NM_001191600	11422.6	338.389	2.987264e+002	3.000833e+001	320	40	8.320851e+000	0	0	0	0	0	0	259.547	1	1	48.2044	39.6452
DATA	1847	22	62	0	0	A_42_P777445	ENSRNOT00000012684	11447.9	338.667	5.691453e+001	6.371164e+000	111	43	1.012570e+001	0	0	0	0	0	0	49.2272	1	1	45.835	42.7667
DATA	1848	22	63	0	0	A_64_P111709	NM_001000554	11473.4	338.573	1.343856e+002	1.374293e+001	178	42	1.729533e+001	0	0	0	0	0	0	115.711	1	1	57.5363	46.1429
DATA	1849	22	64	0	0	A_64_P107509	NM_001191874	11499.3	338.685	4.337495e+001	5.211563e+000	96	43	2.723722e+001	0	0	0	0	1	0	37.1835	1	1	62.0609	52.5926
DATA	1850	22	65	0	0	A_64_P121836	ENSRNOT00000007828	11523.9	338.439	2.612788e+001	3.904106e+000	82	38	7.797994e+000	0	0	0	0	0	0	22.3065	1	1	45.4864	37.3939
DATA	1851	22	66	0	0	A_42_P684281	XR_008784	11549.3	338.689	1.352019e+003	1.352333e+002	1206.5	41.5	1.337596e+001	0	0	0	0	0	0	1149.71	1	1	48.5334	44.4118
DATA	1852	22	67	0	0	A_64_P060804	ENSRNOT00000000462	11575	338.545	4.774130e+001	5.598317e+000	101	44.5	1.056213e+001	0	0	0	0	0	0	40.4395	1	1	55.8519	43.4
DATA	1853	22	68	0	0	A_64_P075675	A_64_P075675	11600.1	338.657	2.078947e+002	2.099552e+001	238	41	9.734747e+000	0	0	0	0	0	0	175.474	1	1	45.835	42.2105
DATA	1854	22	69	0	0	A_44_P254973	NM_198051	11625.3	338.861	3.259330e+001	4.392053e+000	87.5	39	8.300602e+000	0	0	0	0	0	0	27.4196	1	1	47.8731	39.5
DATA	1855	22	70	0	0	A_42_P492976	NM_001126099	11651.4	338.573	1.500446e+002	1.529238e+001	189	37.5	6.564638e+000	0	0	0	0	0	0	125.82	1	1	57.5363	38.2353
DATA	1856	22	71	0	0	A_42_P619114	NM_001014204	11676	338.381	2.122794e+001	3.643851e+000	78	35	1.046353e+001	0	0	0	0	0	0	17.7516	1	1	44.0646	39.6786
DATA	1857	22	72	0	0	A_42_P541625	NM_001126090	11701.7	338.75	9.676249e+003	9.676295e+002	7977.5	39	1.040027e+001	0	0	0	0	0	0	8071.8	1	1	47.5395	40.9677
DATA	1858	22	73	0	0	A_42_P469136	NM_001044288	11727	338.797	5.047429e+002	5.056191e+001	489	41	7.175457e+000	0	0	0	1	0	0	420.149	1	1	46.8651	41.1111
DATA	1859	22	74	0	0	A_64_P101480	ENSRNOT00000034261	11752.5	339	4.467160e+001	5.370208e+000	97	37	5.584115e+000	0	0	0	0	0	0	37.1194	1	1	54.1152	36.5185
DATA	1860	22	75	0	0	A_64_P078554	ENSRNOT00000020079	11778.2	338.971	2.552683e+002	2.570074e+001	275	40	9.031281e+000	0	0	0	0	0	0	211.814	1	1	46.1809	39.2759
DATA	1861	22	76	0	0	A_44_P131067	ENSRNOT00000045483	11803.5	339	1.223901e+001	3.228562e+000	68	37	7.595353e+000	0	0	0	0	0	0	10.1459	1	0	65	37.2424
DATA	1862	22	77	0	0	A_64_P055699	ENSRNOT00000010871	11828.9	338.987	3.837029e+002	3.848655e+001	385.5	40.5	7.045457e+000	0	0	0	0	0	0	317.919	1	1	48.5334	40.9615
DATA	1863	22	78	0	0	A_64_P117203	NM_001106002	11854.2	339	5.346501e+003	5.346584e+002	4461	40	6.844745e+000	0	0	0	0	0	0	4429.76	1	1	46.8651	39.9643
DATA	1864	22	79	0	0	A_44_P357870	NM_031559	11879.6	338.986	2.254998e+002	2.274705e+001	250.5	37.5	8.864238e+000	0	0	0	1	0	0	186.924	1	1	48.2044	39.6667
DATA	1865	22	80	0	0	A_42_P732101	NM_022624	11904.7	338.905	2.657455e+003	2.657623e+002	2187.5	42	8.965863e+000	0	0	0	0	0	0	2205.04	1	1	48.8603	41.6207
DATA	1866	22	81	0	0	A_64_P155054	XM_001062835	11930.2	338.636	4.620275e+001	5.498040e+000	95	41.5	9.388477e+000	0	0	0	0	0	0	38.3963	1	1	45.4864	41.9118
DATA	1867	22	82	0	0	A_44_P534154	NM_001108852	11955.6	339.069	6.500322e+001	7.148094e+000	115.5	39.5	8.754118e+000	0	0	0	0	0	0	54.1436	1	1	53.8203	41.8235
DATA	1868	22	83	66	1	DarkCorner	DarkCorner	11981.3	338.671	2.976114e+000	2.965073e+000	53.5	37.5	9.318759e+000	0	0	0	1	0	0	-7.31504	0	0	47.5395	40.1579
DATA	1869	22	84	66	1	DarkCorner	DarkCorner	12006.5	339	2.965601e+000	2.954599e+000	57	38.5	9.795847e+000	0	0	0	0	0	0	-1.27121	0	0	54.1152	39.8
DATA	1870	22	85	66	1	DarkCorner	DarkCorner	12032.1	339.386	2.952825e+000	2.941870e+000	58	34	7.643527e+000	0	0	0	0	0	0	-1.66171	0	0	57.259	34.4053
DATA	1871	23	1	66	1	DarkCorner	DarkCorner	9886.42	344.079	2.707362e+000	2.697317e+000	59	35	8.088542e+000	0	0	0	0	0	0	-3.07998	0	0	49.1849	35.4164
DATA	1872	23	2	66	1	DarkCorner	DarkCorner	9912.3	343.802	2.697696e+000	2.687688e+000	54	38	8.012473e+000	0	0	0	0	0	0	-6.29923	0	0	52.9257	39.1026
DATA	1873	23	3	66	1	DarkCorner	DarkCorner	9937.33	344.5	2.687979e+000	2.678006e+000	59	44	7.063518e+000	0	0	0	0	0	0	-3.48572	0	0	57.5363	42.5652
DATA	1874	23	4	0	0	A_44_P246268	NM_001106862	9962.4	345.075	1.827340e+001	3.234167e+000	76.5	39	6.035175e+000	0	0	0	0	0	0	16.9599	1	1	46.1809	38.44
DATA	1875	23	5	0	0	A_64_P028396	ENSRNOT00000051835	9987.91	344.307	3.515304e+001	4.407923e+000	94	42	7.585800e+000	0	0	0	0	0	0	32.7374	1	1	48.8603	41.5625
DATA	1876	23	6	0	0	A_64_P020451	XM_219275	10013.4	344.573	2.458174e+001	3.614645e+000	86	38	5.752606e+000	0	0	0	0	0	0	22.9728	1	1	57.5363	38.3226
DATA	1878	23	8	0	0	A_64_P106264	ENSRNOT00000029671	10064.2	344.57	8.183786e+002	8.188019e+001	825	42	1.064511e+001	0	0	0	0	0	0	769.95	1	1	58.0869	44.0385
DATA	1879	23	9	0	0	A_44_P524805	NM_214832	10089.5	344.529	2.347526e+001	3.520833e+000	84	39.5	1.147375e+001	0	0	0	0	0	0	22.157	1	1	47.5395	42.6944
DATA	1880	23	10	0	0	A_42_P764228	NM_031707	10114.8	344.482	1.311652e+003	1.311913e+002	1295	41	8.556036e+000	0	0	0	0	0	0	1241.83	1	1	51.7088	40.9667
DATA	1881	23	11	0	0	A_44_P533760	NM_182843	10140.1	344.662	6.923815e+002	6.928725e+001	692.5	43	1.108122e+001	0	0	0	0	0	0	657.503	1	1	47.8731	43.28
DATA	1882	23	12	0	0	A_42_P524610	NM_001108992	10165.6	344.63	8.972667e+002	8.976434e+001	887	42	1.091272e+001	0	0	0	0	0	0	854.526	1	1	48.2044	43.1714
DATA	1883	23	13	0	0	A_42_P570756	NM_134345	10191.1	344.614	8.354752e+004	8.354752e+003	78938.5	40	9.642172e+000	0	0	0	0	0	0	79786	1	1	57.259	41.973
DATA	1884	23	14	0	0	A_44_P362969	NM_053688	10216.5	345.232	3.837844e+001	4.628080e+000	100	41	8.272461e+000	0	0	0	0	0	0	36.7482	1	1	46.8651	42.4857
DATA	1885	23	15	0	0	A_44_P308197	NM_001012190	10241.7	345	1.333207e+003	1.333456e+002	1364	38.5	7.620895e+000	0	0	0	0	0	0	1279.63	1	1	49.1849	39.3214
DATA	1886	23	16	0	1	ETG05_36762	ETG05_36762	10267	345	3.605829e+001	4.430611e+000	95	39	7.406913e+000	0	0	0	0	0	0	34.6871	1	1	46.8651	39.0645
DATA	1887	23	17	0	0	A_42_P744033	NM_001100846	10292.4	344.769	1.403275e+002	1.426601e+001	196	43	1.150437e+001	0	0	0	0	0	0	135.27	1	1	45.4864	43.1667
DATA	1888	23	18	0	0	A_42_P726363	NM_031536	10318	345	1.816890e+001	3.142688e+000	79.5	39	8.237816e+000	0	0	0	0	0	0	17.5482	1	1	54.9904	38.9556
DATA	1889	23	19	0	0	A_64_P010393	NM_053363	10343.2	345	2.157976e+003	2.158128e+002	2108	38.5	7.864075e+000	0	0	0	0	0	0	2087.8	1	1	46.8651	38.1333
DATA	1890	23	20	0	0	A_42_P612220	NM_001191711	10368.7	344.9	3.220340e+002	3.230468e+001	378	38	7.349173e+000	0	0	0	0	0	0	312.033	1	1	47.2035	38.3
DATA	1891	23	21	0	0	A_44_P393551	NM_012567	10394.1	345.104	1.494428e+004	1.494430e+003	14466	44.5	7.084057e+000	0	0	0	0	0	0	14499.6	1	1	46.8651	44.0357
DATA	1892	23	22	0	0	A_44_P278688	NM_053682	10419.4	345.043	6.725130e+002	6.729962e+001	704	43	9.682264e+000	0	0	0	0	0	0	653.215	1	1	46.8651	42.7097
DATA	1893	23	23	0	0	A_44_P186989	NM_001000076	10445.4	345.014	4.521300e+000	2.587305e+000	69	40.5	5.863289e+000	0	0	0	0	0	0	4.39557	1	0	48.5334	40.6333
DATA	1894	23	24	0	0	A_42_P640277	NM_001003401	10470.2	345	1.217631e+004	1.217633e+003	11302	40	6.124866e+000	0	0	0	0	0	0	11845.5	1	1	46.8651	40.2258
DATA	1895	23	25	0	0	A_44_P398792	NM_053867	10495.7	344.781	4.246330e+003	4.246406e+002	4252	40	4.980578e+000	0	0	0	0	0	0	4132.74	1	1	48.2044	39.6154
DATA	1896	23	26	0	0	A_64_P052552	ENSRNOT00000056797	10521.1	344.931	5.654612e+001	6.200566e+000	120	39	7.112988e+000	0	0	0	0	0	0	55.0472	1	1	46.8651	39
DATA	1897	23	27	0	0	A_64_P119254	NM_001013202	10547.2	345.299	2.553449e+000	2.545174e+000	63	38	5.221663e+000	0	0	0	0	0	0	0.760302	0	0	45.835	38.1081
DATA	1898	23	28	0	0	A_64_P159614	NM_053614	10571.6	344.735	1.288449e+003	1.288700e+002	1354	38	8.619365e+000	0	0	0	0	0	0	1254	1	1	46.5243	38.7037
DATA	1899	23	29	0	0	A_42_P814107	NM_001024750	10597.2	344.825	9.430897e+001	9.768467e+000	150.5	33.5	9.732398e+000	0	0	0	0	0	0	91.7471	1	1	45.1352	37.8571
DATA	1900	23	30	0	0	A_64_P150751	NM_212494	10622.5	345.278	3.882141e+002	3.890490e+001	437	39	9.680709e+000	0	0	0	0	0	0	377.432	1	1	48.2044	40.129
DATA	1902	23	32	0	0	A_44_P838888	ENSRNOT00000038829	10673.5	345.072	4.111638e+001	4.839607e+000	104.5	36	7.464446e+000	0	0	0	0	0	0	39.8916	1	1	47.8731	35.8889
DATA	1903	23	33	0	0	A_43_P12927	NM_053769	10699	345.455	1.671130e+002	1.690565e+001	226	41.5	8.172821e+000	0	0	0	0	0	0	161.92	1	1	55.8519	41.4118
DATA	1904	23	34	0	0	A_64_P140806	A_64_P140806	10723.9	344.969	1.424172e+004	1.424175e+003	13686	41	8.846307e+000	0	0	0	0	0	0	13776.9	1	1	46.8651	40.4857
DATA	1905	23	35	0	0	A_42_P607026	NM_001106839	10749.5	344.773	2.706907e+003	2.707028e+002	2619	39.5	7.631614e+000	0	0	0	0	0	0	2613.74	1	1	46.5243	40.8077
DATA	1906	23	36	0	0	A_44_P272186	NM_001107950	10774.6	344.985	1.654394e+001	3.056476e+000	77.5	38	8.713297e+000	0	0	0	0	0	0	15.9429	1	1	45.4864	39.8077
DATA	1907	23	37	0	0	A_44_P226658	NM_017046	10800.2	345.543	2.507279e+001	3.594505e+000	83.5	39.5	7.706041e+000	0	0	0	0	0	0	24.109	1	1	47.5395	39.3125
DATA	1908	23	38	0	0	A_64_P119279	NM_001108109	10825.6	345.392	6.095108e+003	6.095162e+002	5921	40	1.145679e+001	0	0	0	0	0	0	5846.33	1	1	49.1849	41.5161
DATA	1909	23	39	0	0	A_44_P1042876	NM_212504	10851	345.427	1.343522e+003	1.343771e+002	1340.5	41	9.674373e+000	0	0	0	0	0	0	1285.26	1	1	49.1849	41.3333
DATA	1910	23	40	0	0	A_64_P119607	ENSRNOT00000037601	10876.4	345.5	1.250827e+002	1.277488e+001	180	38.5	6.324412e+000	0	0	0	0	0	0	119.318	1	1	47.8731	39.2083
DATA	1911	23	41	0	0	A_42_P784252	NM_133557	10901.9	344.969	4.122999e+003	4.123082e+002	3972	37	7.682432e+000	0	0	0	0	0	0	3920.65	1	1	46.8651	38.7391
DATA	1912	23	42	0	0	A_44_P1033194	NM_139328	10927.3	345.373	1.421853e+003	1.422093e+002	1417	39	6.748531e+000	0	0	0	0	0	0	1347.77	1	1	46.1809	40.6053
DATA	1913	23	43	0	0	A_42_P800048	NM_207610	10952.7	345.1	2.854506e+003	2.854626e+002	2724	41	6.806859e+000	0	0	0	0	0	0	2696.43	1	1	47.2035	41.4444
DATA	1914	23	44	0	0	A_43_P11525	NM_012710	10978.3	345.5	4.506108e+001	5.218092e+000	106	40.5	8.898367e+000	0	0	0	0	0	0	42.4135	1	1	57.5363	41.9706
DATA	1915	23	45	0	0	A_64_P019037	NM_001013886	11003.5	345.5	3.057910e+004	3.057911e+003	28037	41	8.480411e+000	0	0	0	0	0	0	28675.4	1	1	57.5363	40.9259
DATA	1916	23	46	0	0	A_64_P003378	NM_001024336	11029.1	345.5	2.315244e+002	2.330378e+001	280	37	7.611910e+000	0	0	0	0	0	0	216.256	1	1	56.9804	38
DATA	1917	23	47	0	0	A_44_P258855	NM_053431	11054.2	345.639	3.011473e+003	3.011590e+002	2873	35	5.412094e+000	0	0	0	0	0	0	2801.68	1	1	47.8731	34.9429
DATA	1918	23	48	0	1	ETG09_35454	ETG09_35454	11079.7	345.5	7.662893e+000	2.781024e+000	68.5	39	9.236391e+000	0	0	0	0	0	0	7.09903	1	0	57.5363	39.4286
DATA	1919	23	49	0	0	A_64_P089677	NM_001105977	11105.4	345.573	9.651446e+001	1.001798e+001	150	37.5	5.594090e+000	0	0	0	0	0	0	89.0233	1	1	57.5363	37.5769
DATA	1920	23	50	0	0	A_64_P013609	A_64_P013609	11129.7	345.419	2.706513e+000	2.701874e+000	65	40	8.433420e+000	0	0	0	0	0	0	1.56853	0	0	48.5334	40.4516
DATA	1921	23	51	0	0	A_44_P357470	NM_030849	11155.8	345.356	3.109120e+002	3.120900e+001	334	40	8.170144e+000	0	0	0	0	0	0	284.241	1	1	48.5334	38.3143
DATA	1922	23	52	0	0	A_44_P404064	ENSRNOT00000015387	11181.1	345.534	4.528902e+002	4.537071e+001	464.5	36.5	8.408329e+000	0	0	0	0	0	0	412.154	1	1	48.5334	38.7
DATA	1923	23	53	0	0	A_64_P092167	A_64_P092167	11206.6	345.573	2.271138e+001	3.554457e+000	83	40	9.306645e+000	0	0	0	0	0	0	20.5717	1	1	57.5363	40.3636
DATA	1924	23	54	0	0	A_42_P463036	ENSRNOT00000038596	11231.9	345.735	1.585777e+003	1.586015e+002	1445.5	43	9.972117e+000	0	0	0	0	0	0	1429.65	1	1	45.835	42.0357
DATA	1925	23	55	0	0	A_44_P1003794	NM_012576	11257.4	345.742	6.902978e+002	6.908495e+001	672.5	44	9.100154e+000	0	0	0	0	0	0	619.362	1	1	46.1809	45.7931
DATA	1926	23	56	0	0	A_64_P099006	BC105831	11283.1	345.852	7.730731e+000	2.879432e+000	69	42.5	8.284690e+000	0	0	0	0	0	0	6.90277	1	0	45.1352	42.5938
DATA	1927	23	57	0	0	A_42_P795467	NM_001108055	11308.2	345.542	1.986934e+002	2.006386e+001	237.5	39	8.583551e+000	0	0	0	1	0	0	176.561	1	1	47.8731	37.9655
DATA	1928	23	58	0	0	A_42_P629321	NM_031590	11333.7	345.712	2.493011e+001	3.749384e+000	83	37	5.633749e+000	0	0	0	0	0	0	22.0472	1	1	42.9674	37.5
DATA	1929	23	59	0	0	A_42_P549786	NM_022609	11358.9	345.735	1.690774e+003	1.691008e+002	1555	40	8.845447e+000	0	0	0	0	0	0	1488.17	1	1	45.835	39.125
DATA	1930	23	60	0	0	A_64_P006354	ENSRNOT00000043959	11384.1	345.697	4.666070e+001	5.455725e+000	105	38	1.055182e+001	0	0	0	0	0	0	40.876	1	1	45.835	41.2162
DATA	1931	23	61	0	0	A_64_P057109	A_64_P057109	11409.8	345.75	5.866786e+002	5.873658e+001	576.5	38	9.330803e+000	0	0	0	0	0	0	511.518	1	1	45.1352	39.0952
DATA	1932	23	62	0	0	A_44_P101361	NM_032070	11435.5	346	1.794473e+001	3.371045e+000	76.5	40	8.807185e+000	0	0	0	0	0	0	15.5736	1	1	65	40.931
DATA	1933	23	63	0	0	A_64_P103354	ENSRNOT00000066893	11460.4	345.971	3.083529e+002	3.096823e+001	325.5	44	1.155712e+001	0	0	0	0	0	0	266.427	1	1	46.1809	44.4815
DATA	1934	23	64	0	0	A_42_P746868	NM_001127580	11485.8	345.794	1.230858e+004	1.230862e+003	10470	51.5	7.197337e+001	0	0	1	0	1	0	10588	1	1	46.1809	85.2
DATA	1935	23	65	0	0	A_42_P707838	NM_012979	11511.1	345.786	7.370186e+002	7.375855e+001	688	37.5	7.672479e+000	0	0	0	0	0	0	631.313	1	1	46.8651	37.6875
DATA	1936	23	66	0	0	A_42_P628098	NM_001107991	11536.8	346.059	1.156698e+003	1.157062e+002	1054	39	7.606388e+000	0	0	0	0	0	0	986.746	1	1	50.7771	40
DATA	1937	23	67	0	0	A_64_P028071	ENSRNOT00000042928	11562.5	346	3.034471e+005	3.034471e+004	252370	41	1.272277e+001	0	0	0	0	0	0	257836	1	1	54.1152	43.1143
DATA	1938	23	68	0	0	A_64_P002944	A_64_P002944	11587.6	345.985	3.730641e+003	3.730756e+002	3210.5	42	9.112056e+000	0	0	0	0	0	0	3158.32	1	1	47.5395	43.6207
DATA	1939	23	69	0	0	A_64_P072159	XM_574060	11613.1	345.857	2.556799e+001	3.893045e+000	81.5	40	7.365974e+000	0	0	0	0	0	0	21.5697	1	1	42.5954	39.5
DATA	1940	23	70	0	0	A_64_P052365	NM_001109318	11638.4	346	1.645555e+002	1.671702e+001	199	41	8.684611e+000	0	0	0	0	0	0	138.38	1	1	48.5334	40.8235
DATA	1941	23	71	0	0	A_64_P023150	ENSRNOT00000042777	11663.8	346	5.436417e+002	5.444435e+001	525	44	1.232675e+001	0	0	0	0	0	0	455.819	1	1	49.1849	44.5556
DATA	1942	23	72	0	0	A_44_P374902	NM_133429	11689	346.061	4.755676e+002	4.764888e+001	465	38	1.002277e+001	0	0	0	0	0	0	397.7	1	1	46.8651	40.2368
DATA	1943	23	73	0	0	A_44_P163271	NM_198733	11714.8	346.082	1.344869e+001	3.258963e+000	70.5	44	7.915685e+000	0	0	0	0	0	0	11.2203	1	0	47.2035	43.4839
DATA	1944	23	74	0	0	A_42_P548520	NM_001100834	11739.8	345.727	1.804180e+003	1.804425e+002	1599	38	7.512999e+000	0	0	0	0	0	0	1502.24	1	1	45.4864	39.6129
DATA	1945	23	75	0	0	A_64_P012154	XM_225935	11765.3	345.925	1.841320e+001	3.502180e+000	75	37	7.376510e+000	0	0	0	0	0	0	15.3079	1	1	45.835	37.2903
DATA	1946	23	76	0	0	A_64_P033574	NM_001000606	11790.5	346.159	5.420343e+000	3.031259e+000	63	43.5	1.167930e+001	0	0	0	0	0	0	4.50117	1	0	44.4243	42.0357
DATA	1947	23	77	0	0	A_64_P027764	NM_022685	11816.4	346.427	1.064804e+002	1.105839e+001	148.5	39	9.440931e+000	0	0	0	0	0	0	88.3617	1	1	57.5363	41.2581
DATA	1948	23	78	0	0	A_42_P484738	NM_022266	11841.4	346.257	5.871707e+002	5.879291e+001	552	40.5	5.349865e+000	0	0	0	0	0	0	487.116	1	1	48.5334	39.9
DATA	1949	23	79	0	0	A_64_P036355	NM_053311	11866.6	346.389	7.196158e+003	7.196220e+002	6084	39.5	7.576430e+000	0	0	0	0	0	0	5971.4	1	1	48.2044	39.6667
DATA	1950	23	80	0	0	A_42_P694928	NM_001109046	11892.4	346.427	1.181301e+002	1.218366e+001	159.5	37	5.862878e+000	0	0	0	0	0	0	98.1008	1	1	57.5363	36.96
DATA	1951	23	81	0	0	A_42_P588738	NM_133542	11917.6	345.623	3.541008e+002	3.553515e+001	345	42	9.550404e+000	0	0	0	0	0	0	294.401	1	1	43.3362	42.8919
DATA	1952	23	82	0	0	A_64_P141254	XM_001060542	11943.3	346.5	1.908190e+001	3.532400e+000	75	38	8.568684e+000	0	0	0	0	0	0	15.898	1	1	57.5363	40.7879
DATA	1953	23	83	0	0	A_42_P546054	NM_001013873	11968.6	346.377	1.375605e+002	1.407202e+001	176.5	39	1.021879e+001	0	0	0	1	0	0	114.893	1	1	49.8279	41.0968
DATA	1954	23	84	66	1	DarkCorner	DarkCorner	11994.2	346.351	2.966774e+000	2.955767e+000	57.5	40	8.817894e+000	0	0	0	0	0	0	-2.8617	0	0	49.8279	40.4595
DATA	1955	23	85	66	1	DarkCorner	DarkCorner	12018.4	346.288	2.955966e+000	2.944999e+000	58	36	7.840470e+000	0	0	0	0	0	0	-0.384047	0	0	51.0895	36.8378
DATA	1956	24	1	66	1	DarkCorner	DarkCorner	9899.14	352.658	2.698868e+000	2.688855e+000	61	34	7.549886e+000	0	0	0	0	0	0	-2.2417	0	0	47.8731	35.8627
DATA	1957	24	2	66	1	DarkCorner	DarkCorner	9924.99	351.985	2.689503e+000	2.679525e+000	58	39	6.490610e+000	0	0	0	0	0	0	-4.07911	0	0	46.8651	39.5313
DATA	1958	24	3	0	0	A_64_P000371	NM_017308	9949.71	351.754	1.094236e+003	1.094561e+002	1075.5	40	6.357673e+000	0	0	0	0	0	0	1014.82	1	1	45.1352	39.5
DATA	1959	24	4	0	0	A_42_P772356	NM_001191597	9975	351.817	2.090420e+003	2.090589e+002	2031	41.5	7.907221e+000	0	0	0	0	0	0	1945.47	1	1	46.8651	40.4
DATA	1961	24	6	0	0	A_42_P470757	NM_001004075	10025.8	352	1.766445e+003	1.766642e+002	1676	38	6.385058e+000	0	0	0	0	0	0	1655.29	1	1	46.8651	38.3
DATA	1962	24	7	0	0	A_64_P034250	ENSRNOT00000041464	10051.5	352	4.192629e+001	4.951411e+000	99	36	8.626138e+000	0	0	0	0	0	0	39.4206	1	1	54.1152	39.4444
DATA	1963	24	8	0	0	A_64_P065063	NM_012954	10076.6	352.069	7.100228e+001	7.570144e+000	133	45	1.149520e+001	0	0	0	0	0	0	66.974	1	1	53.8203	45.2963
DATA	1964	24	9	0	0	A_64_P088866	ENSRNOT00000049194	10102.4	352.427	3.514177e+002	3.523909e+001	391	40	8.792974e+000	0	0	0	0	0	0	332.558	1	1	57.5363	40.6765
DATA	1965	24	10	0	0	A_44_P111759	NM_001000956	10127.7	352.169	6.690999e+000	2.693723e+000	70	42	9.305514e+000	0	0	0	0	0	0	6.35085	1	0	47.5395	41
DATA	1966	24	11	0	0	A_64_P045019	ENSRNOT00000032417	10152.9	351.818	8.986482e+002	8.990248e+001	923	43.5	1.004107e+001	0	0	0	0	0	0	855.407	1	1	48.5334	43.2667
DATA	1967	24	12	0	0	A_64_P138989	XM_001053562	10178.4	352.427	7.025817e+001	7.489520e+000	128	45	9.841995e+000	0	0	0	0	0	0	67.07	1	1	65	44
DATA	1968	24	13	0	0	A_42_P537715	NM_001025743	10203.4	352.36	9.168378e+002	9.172029e+001	914.5	42	6.880519e+000	0	0	0	0	0	0	877.506	1	1	48.8603	42.3077
DATA	1969	24	14	0	0	A_42_P453171	NM_001107063	10228.8	352.176	7.471000e+002	7.475458e+001	772.5	40	9.212661e+000	0	0	0	0	0	0	716.823	1	1	48.2044	41.8387
DATA	1971	24	16	0	0	A_64_P096157	ENSRNOT00000059486	10280	352.455	7.743370e+001	8.158556e+000	131	43	9.286364e+000	0	0	0	0	0	0	74.6359	1	1	55.8519	43.3548
DATA	1972	24	17	0	0	A_43_P10076	NM_031665	10305	352.3	5.806782e+003	5.806838e+002	5398	40	9.354245e+000	0	0	0	0	0	0	5607.82	1	1	46.5243	39.2424
DATA	1974	24	19	0	0	A_42_P772878	NM_001011936	10355.9	352.042	1.654178e+003	1.654375e+002	1667.5	35	8.136074e+000	0	0	0	0	0	0	1602.93	1	1	46.8651	36.9355
DATA	1976	24	21	0	0	A_44_P447394	NM_019193	10406.5	352.5	3.641514e+003	3.641603e+002	3547.5	43	7.682815e+000	0	0	0	0	0	0	3538.1	1	1	49.1849	41.4444
DATA	1977	24	22	0	0	A_42_P504250	NM_001134987	10432.1	352.159	3.418231e+002	3.427704e+001	396	39	7.152011e+000	0	0	0	0	0	0	332.437	1	1	46.8651	39.7143
DATA	1978	24	23	0	0	A_42_P675802	NM_145777	10457.3	352.338	7.094822e+002	7.099384e+001	742	38	7.934305e+000	0	0	0	0	0	0	690.552	1	1	48.5334	39.1034
DATA	1979	24	24	0	0	A_64_P111843	XM_001074913	10483.1	352.5	6.184436e+002	6.189662e+001	653	40	6.660652e+000	0	0	0	0	0	0	602.299	1	1	56.9804	39.5833
DATA	1980	24	25	0	0	A_44_P118724	NM_019361	10508.1	351.825	4.103341e+003	4.103419e+002	4059	39.5	5.979720e+000	0	0	0	0	0	0	3997.27	1	1	45.4864	40.7188
DATA	1981	24	26	0	0	A_43_P21749	NM_001108329	10533.7	352.5	3.834505e+001	4.600491e+000	100	39	5.263456e+000	0	0	0	0	0	0	37.3612	1	1	57.5363	39.1944
DATA	1982	24	27	0	0	A_43_P11879	NM_017250	10559.1	352.258	4.845963e+001	5.472310e+000	109.5	41	8.156565e+000	0	0	0	0	0	0	47.21	1	1	44.7812	38.6207
DATA	1983	24	28	0	0	A_64_P023182	NM_001000033	10584.5	352.338	1.043579e+001	2.748832e+000	73	40	9.668035e+000	0	0	0	0	0	0	10.1634	1	0	46.5243	40.2857
DATA	1985	24	30	0	0	A_44_P368461	NM_001107085	10635.5	352.5	2.028378e+001	3.255565e+000	81	38.5	9.850984e+000	0	0	0	0	0	0	19.7278	1	1	57.5363	39.5588
DATA	1986	24	31	0	0	A_64_P097257	A_64_P097257	10660.8	352.309	5.387538e+001	5.960152e+000	116.5	37	1.136743e+001	0	0	0	0	0	0	52.3444	1	1	46.5243	38.5385
DATA	1987	24	32	0	0	A_64_P100634	NM_001100171	10686.1	352.621	1.989544e+002	2.005846e+001	260	39.5	9.319253e+000	0	0	0	0	0	0	193.068	1	1	45.4864	41
DATA	1988	24	33	0	0	A_64_P041902	NM_001025653	10711.4	352.329	1.493464e+003	1.493683e+002	1506.5	45	9.898730e+000	0	0	0	0	0	0	1447.11	1	1	48.5334	43.2121
DATA	1990	24	35	0	0	A_64_P116171	NM_001004266	10762.1	352.582	7.667908e+001	8.085588e+000	138	38.5	1.037016e+001	0	0	0	0	0	0	74.0341	1	1	46.1809	41.3333
DATA	1991	24	36	0	0	A_44_P243279	NM_001134780	10787.6	352.573	3.147504e+002	3.157984e+001	378	40	1.091221e+001	0	0	0	0	0	0	303.245	1	1	57.5363	42.1724
DATA	1992	24	37	0	0	A_64_P151468	XM_001062494	10813.4	352.573	1.833481e+001	3.162489e+000	81	41	9.855733e+000	0	0	0	0	0	0	17.6225	1	1	57.5363	42.7241
DATA	1993	24	38	0	0	A_64_P075769	ENSRNOT00000043984	10838.3	352.627	2.203043e+003	2.203194e+002	2157.5	43	1.107803e+001	0	0	0	0	0	0	2112.19	1	1	46.1809	43.4286
DATA	1994	24	39	0	0	A_42_P508921	NM_031703	10864	352.545	2.600075e+000	2.599777e+000	63	42	7.726381e+000	0	0	0	0	0	0	2.10606	0	0	65	42
DATA	1995	24	40	0	0	A_44_P503376	NM_001000274	10889.5	352.648	2.607762e+000	2.598087e+000	59	39.5	8.326029e+000	0	0	0	0	0	0	-3.98719	0	0	57.5363	39.2857
DATA	1996	24	41	0	0	A_64_P093088	NM_001000816	10914.1	352.742	1.039234e+001	2.805552e+000	72	37	6.499397e+000	0	0	0	0	0	0	9.8766	1	0	44.7812	38.3704
DATA	1997	24	42	0	0	A_44_P489608	NM_023967	10940.3	352.698	9.023150e+001	9.394425e+000	148.5	39	4.599489e+000	0	0	0	0	0	0	85.4592	1	1	44.4243	39.697
DATA	1998	24	43	0	0	A_44_P213088	ENSRNOT00000037507	10965.5	353	1.796883e+001	3.180227e+000	80	41	8.593047e+000	0	0	0	0	0	0	16.9602	1	1	54.1152	41.9118
DATA	1999	24	44	0	0	A_64_P060725	NM_001025278	10990.9	352.935	2.643411e+000	2.645085e+000	65	39	7.388694e+000	0	0	0	0	0	0	2.31507	0	0	54.4085	39.0303
DATA	2000	24	45	0	0	A_44_P384698	XM_216321	11016.4	352.781	1.824266e+003	1.824458e+002	1835	39	7.536025e+000	0	0	0	0	0	0	1708.95	1	1	44.7812	39.3333
DATA	2001	24	46	0	0	A_42_P696084	NM_031022	11041.9	352.949	1.295401e+003	1.295673e+002	1262	38.5	8.511792e+000	0	0	0	0	0	0	1208.7	1	1	49.1849	39.4688
DATA	2002	24	47	0	0	A_64_P014918	NM_001108246	11067.1	352.935	8.173536e+002	8.177880e+001	824	38	9.727928e+000	0	0	0	0	0	0	759.54	1	1	54.4085	38.5152
DATA	2003	24	48	0	0	A_64_P032690	ENSRNOT00000049975	11092.5	353	3.473854e+004	3.473855e+003	32911	38.5	8.637067e+000	0	0	0	0	0	0	32145	1	1	54.1152	38.6471
DATA	2004	24	49	0	0	A_42_P481516	NM_134364	11117.8	352.913	3.448062e+003	3.448167e+002	3228	46	1.041728e+001	0	0	0	1	0	0	3176.77	1	1	46.8651	43.6552
DATA	2005	24	50	0	0	A_64_P166158	ENSRNOT00000013694	11143.5	353	9.696939e+001	1.006589e+001	152	41	7.393502e+000	0	0	0	0	0	0	88.939	1	1	54.1152	40.4286
DATA	2006	24	51	0	0	A_64_P140338	A_64_P140338	11168.3	353.304	5.488053e+000	2.767162e+000	67	40.5	8.565921e+000	0	0	0	0	0	0	5.01144	1	0	41.4593	40.625
DATA	2007	24	52	0	1	ERCC-00062_278	ERCC-00062_278	11194	352.698	2.493953e+002	2.508798e+001	289	41	8.302975e+000	0	0	0	0	0	0	226.652	1	1	45.1352	40.2424
DATA	2008	24	53	0	0	A_64_P110838	NM_001013175	11219.3	353.222	1.333156e+002	1.360976e+001	181	42	8.287774e+000	0	0	0	0	0	0	120.603	1	1	45.1352	42.4828
DATA	2009	24	54	0	0	A_42_P802358	NM_001024341	11244.6	353	7.245109e+003	7.245161e+002	6599	42	1.158977e+001	0	0	0	0	0	0	6523.07	1	1	48.5334	42.2143
DATA	2010	24	55	0	0	A_64_P010421	A_64_P010421	11270.2	352.825	2.431129e+001	3.681128e+000	83.5	41.5	5.081490e+000	0	0	0	0	0	0	21.783	1	1	45.1352	42.6923
DATA	2011	24	56	0	0	A_43_P13320	NM_138880	11295.2	353.191	1.121210e+001	2.994849e+000	71	40	9.320213e+000	0	0	0	0	0	0	9.99926	1	0	46.1809	40.4595
DATA	2012	24	57	0	0	A_42_P800916	NM_022403	11321.3	352.844	4.057003e+001	4.924286e+000	99	37	6.369760e+000	0	0	0	0	0	0	36.0015	1	1	45.4864	37.4231
DATA	2013	24	58	0	0	A_42_P554610	XM_001064863	11346.1	352.672	6.345563e+003	6.345625e+002	5417.5	39	7.890569e+000	0	0	0	0	0	0	5604.55	1	1	45.1352	37.7586
DATA	2014	24	59	0	0	A_42_P476353	NM_001012113	11371.4	352.656	5.055341e+003	5.055419e+002	4434	43	1.075432e+001	0	0	0	0	0	0	4443.89	1	1	45.1352	42.303
DATA	2015	24	60	0	0	A_43_P12234	NM_022516	11397	352.742	1.082186e+003	1.082556e+002	971	38	1.029669e+001	0	0	0	0	0	0	946.807	1	1	45.835	40.5143
DATA	2016	24	61	0	0	A_64_P048315	ENSRNOT00000044039	11422.8	352.716	1.162341e+002	1.196634e+001	162	40	9.520722e+000	0	0	0	0	0	0	101.214	1	1	45.835	40.5405
DATA	2017	24	62	0	0	A_44_P477047	NM_171983	11448	353.455	3.404469e+004	3.404470e+003	28619.5	42.5	7.604857e+000	0	0	0	0	0	0	29515.3	1	1	55.8519	41.0769
DATA	2018	24	63	0	0	A_43_P11871	NM_017230	11473.4	352.833	5.088915e+001	5.842284e+000	104	43	1.107231e+001	0	0	0	0	0	0	43.919	1	1	42.9674	44.8966
DATA	2019	24	64	0	0	A_64_P060608	XM_001068783	11498.6	353.427	4.010530e+001	4.938499e+000	93	41.5	2.618787e+001	0	0	0	0	0	0	34.4676	1	1	57.5363	49.2692
DATA	2020	24	65	0	0	A_64_P115811	NM_001008516	11524.6	353.327	2.217904e+001	3.646209e+000	79	38	9.022552e+000	0	0	0	0	0	0	18.98	1	1	41.4593	38.8387
DATA	2021	24	66	0	0	A_44_P131296	ENSRNOT00000039892	11549.5	353.5	2.935733e+001	4.130338e+000	83.5	40	1.103660e+001	0	0	0	0	0	0	25.0253	1	1	57.5363	42.25
DATA	2022	24	67	0	0	A_44_P668388	NM_001109245	11575	353.455	2.119697e+002	2.139667e+001	239	42.5	7.741184e+000	0	0	0	0	0	0	180.002	1	1	55.8519	42
DATA	2023	24	68	0	0	A_64_P069729	NM_019189	11599.9	353.273	4.277862e+001	5.183293e+000	96	42	9.225213e+000	0	0	0	0	0	0	36.1986	1	1	45.835	43.2368
DATA	2024	24	69	1028	1	(+)E1A_r60_1	E1A_r60_1	11625.7	353.233	4.302439e+000	2.968188e+000	64	39	7.276557e+000	0	0	0	0	0	0	3.62827	1	0	44.0646	38.3448
DATA	2025	24	70	0	0	A_64_P165441	NM_001109059	11651.3	353.5	2.384711e+001	3.790083e+000	79	38	8.873773e+000	0	0	0	0	0	0	20.049	1	1	57.5363	40.3793
DATA	2026	24	71	0	0	A_44_P1034910	NM_201562	11676.3	353.382	1.367262e+003	1.367581e+002	1185	38	1.053778e+001	0	0	0	0	0	0	1146.33	1	1	46.5243	39.7
DATA	2027	24	72	0	0	A_42_P631818	NM_030854	11702	353.243	7.686876e+001	8.237605e+000	127	39.5	8.550272e+000	0	0	0	0	0	0	64.2855	1	1	46.8651	40.5833
DATA	2028	24	73	0	0	A_64_P095620	ENSRNOT00000031258	11727.2	353.212	3.645031e+001	4.700390e+000	92.5	40	5.936214e+000	0	0	0	0	0	0	30.4188	1	1	40.6843	40.3636
DATA	2029	24	74	0	0	A_42_P726573	NM_053838	11752.3	353.389	5.737257e+002	5.744954e+001	539.5	38	8.598575e+000	0	0	0	0	0	0	477.97	1	1	48.5334	40
DATA	2030	24	75	0	0	A_64_P029142	NM_001107866	11777.6	353.574	3.319154e+001	4.458486e+000	89	40	9.530752e+000	0	0	0	0	0	0	27.6149	1	1	46.5243	40.9091
DATA	2031	24	76	0	0	A_43_P22902	NM_001106874	11803.4	353.4	2.990871e+000	2.979774e+000	59	41	1.045050e+001	0	0	0	0	0	0	-1.90117	0	0	47.5395	41.7097
DATA	2032	24	77	0	0	A_42_P619008	NM_001013079	11828.5	353.427	2.321278e+003	2.321470e+002	1976.5	39	7.353895e+000	0	0	0	0	0	0	1928.4	1	1	49.1849	39.8148
DATA	2033	24	78	0	0	A_64_P054421	A_64_P054421	11854.4	353.573	1.013472e+001	3.148749e+000	67	40	6.443031e+000	0	0	0	0	0	0	8.41951	1	0	65	39.0667
DATA	2034	24	79	0	0	A_42_P627330	NM_001106628	11879.3	353.473	3.313572e+002	3.326943e+001	342.5	39	8.381023e+000	0	0	0	0	0	0	275.407	1	1	48.8603	41.1923
DATA	2035	24	80	0	0	A_64_P049613	A_64_P049613	11904.5	353.6	2.128374e+001	3.659330e+000	78	41	7.909470e+000	0	0	0	0	0	0	17.7084	1	1	47.5395	41.5294
DATA	2036	24	81	0	0	A_42_P708614	NM_001130505	11930.4	353.373	1.836406e+004	1.836409e+003	15313.5	43.5	9.377533e+000	0	0	0	1	0	0	15303.5	1	1	51.7088	43.1842
DATA	2037	24	82	0	0	A_42_P660068	NM_031350	11955.8	353.356	9.243008e+002	9.247763e+001	849.5	44	7.938869e+000	0	0	0	0	0	0	771.957	1	1	48.5334	42.5556
DATA	2038	24	83	66	1	DarkCorner	DarkCorner	11980.5	353.37	2.968226e+000	2.957214e+000	60	39	8.707349e+000	0	0	0	0	0	0	-0.0150949	0	0	39.0882	39.5789
DATA	2039	24	84	66	1	DarkCorner	DarkCorner	12006.7	353.382	2.957513e+000	2.946541e+000	58	41.5	7.751037e+000	0	0	0	0	0	0	-0.595888	0	0	46.5243	42.25
DATA	2040	24	85	66	1	DarkCorner	DarkCorner	12032.3	353.575	2.944843e+000	2.933917e+000	59	34	7.717884e+000	0	0	0	0	0	0	-1.67827	0	0	52.0157	34.6898
DATA	2041	25	1	66	1	DarkCorner	DarkCorner	9886.42	359.427	2.700692e+000	2.690672e+000	62	36	8.040991e+000	0	0	0	0	0	0	-1.74167	0	0	57.5363	36.7326
DATA	2042	25	2	66	1	DarkCorner	DarkCorner	9911.57	359.261	2.691450e+000	2.681464e+000	60	37	7.328028e+000	0	0	0	0	0	0	-2.107	0	0	52.0157	39
DATA	2043	25	3	0	0	A_64_P106975	A_64_P106975	9937.04	359.028	1.395487e+002	1.420841e+001	191	40	6.600098e+000	0	0	0	0	0	0	129.337	1	1	46.8651	40.1935
DATA	2044	25	4	0	0	A_42_P799702	NM_145093	9962.58	359.427	1.583009e+002	1.605247e+001	207.5	39.5	7.590683e+000	0	0	0	1	0	0	147.24	1	1	57.5363	39.5385
DATA	2045	25	5	0	0	A_42_P704429	NM_053428	9987.63	359.36	1.750238e+004	1.750240e+003	15665.5	42.5	6.136140e+000	0	0	0	0	0	0	16334.7	1	1	48.8603	43.3438
DATA	2046	25	6	0	0	A_64_P129730	NM_001033896	10013.2	359.5	5.890289e+001	6.456733e+000	116	39	6.563790e+000	0	0	0	0	0	0	55.1622	1	1	49.8279	38.6
DATA	2047	25	7	0	0	A_64_P156308	NM_001008284	10038.4	359.64	3.526645e+002	3.536481e+001	381	43	1.224594e+001	0	0	0	0	0	0	331.372	1	1	48.8603	44.0857
DATA	2048	25	8	0	0	A_44_P152029	A_44_P152029	10064.1	359.5	1.760802e+001	3.162639e+000	80.5	45.5	1.824622e+001	0	0	0	0	0	0	16.5994	1	1	56.9804	50.7308
DATA	2049	25	9	0	0	A_42_P751152	NM_001106360	10089.5	359.5	2.002715e+004	2.002717e+003	19051.5	43	1.290564e+001	0	0	0	0	0	0	18940	1	1	57.5363	45.5
DATA	2050	25	10	0	0	A_64_P010494	NM_001001421	10114.7	359.214	8.294168e+001	8.695414e+000	140	41	1.000231e+001	0	0	0	0	0	0	78.6758	1	1	47.2035	40.25
DATA	2051	25	11	0	0	A_64_P054606	NM_001107279	10140.2	359.397	2.831760e+002	2.843699e+001	335	43	9.406372e+000	0	0	0	0	0	0	269.421	1	1	46.5243	42.3125
DATA	2052	25	12	0	0	A_44_P335679	NM_001108168	10165.5	359.5	2.815776e+001	3.829666e+000	87	47	9.335246e+000	0	0	0	0	0	0	26.8662	1	1	57.5363	45.5357
DATA	2053	25	13	0	0	A_64_P128766	NM_001034912	10191.1	359.5	1.311972e+002	1.337267e+001	184	42	1.035753e+001	0	0	0	0	0	0	125.521	1	1	56.9804	43.8182
DATA	2054	25	14	0	0	A_42_P595591	NM_031011	10216.3	359.757	7.938715e+003	7.938757e+002	7369	40	6.704593e+000	0	0	0	0	0	0	7614.75	1	1	48.8603	40.4815
DATA	2055	25	15	0	0	A_44_P962846	ENSRNOT00000058887	10241.5	359.442	1.373491e+002	1.397437e+001	192	38	7.856557e+000	0	0	0	0	0	0	132.055	1	1	49.8279	40.1765
DATA	2056	25	16	0	0	A_64_P111878	XR_005569	10267.1	359.896	1.232685e+003	1.232953e+002	1292.5	39	7.067004e+000	0	0	0	0	0	0	1187.91	1	1	46.8651	40.1563
DATA	2057	25	17	0	0	A_64_P149225	NM_001100833	10292.6	359.573	8.393342e+004	8.393342e+003	80317	43	1.306994e+001	0	0	0	0	0	0	81049.5	1	1	57.5363	44.36
DATA	2058	25	18	0	0	A_64_P032361	ENSRNOT00000061428	10317.6	359.559	8.872777e+002	8.876470e+001	895.5	39	5.714228e+000	0	0	0	0	0	0	858.386	1	1	46.8651	37.8824
DATA	2059	25	19	0	0	A_64_P038843	A_64_P038843	10343.8	359.486	1.136951e+001	2.797062e+000	74.5	39	7.089747e+000	0	0	0	0	0	0	11.0184	1	0	47.8731	37.7419
DATA	2060	25	20	1028	1	(+)E1A_r60_a97	E1A_r60_a97	10368.6	359.573	2.561290e+000	2.551788e+000	60	41	7.450986e+000	0	0	0	0	0	0	-0.222106	0	0	57.5363	40.9643
DATA	2061	25	21	0	0	A_42_P586883	NM_001106416	10394.4	359.573	2.335723e+001	3.456876e+000	86	43	8.561373e+000	0	0	0	0	0	0	22.6995	1	1	57.5363	42.9167
DATA	2062	25	22	0	0	A_42_P626023	NM_001107265	10419.6	359.573	1.948778e+002	1.965335e+001	256.5	42	6.977468e+000	0	0	0	0	0	0	189.596	1	1	57.5363	41.2667
DATA	2063	25	23	0	0	A_64_P304646	ENSRNOT00000046873	10444.3	360.241	3.206866e+001	4.092935e+000	94	37.5	8.620988e+000	0	0	0	0	0	0	31.2289	1	1	42.9674	38.3929
DATA	2064	25	24	0	0	A_42_P540711	NM_133568	10470.2	359.916	4.191361e+003	4.191438e+002	4106	40	7.862907e+000	0	0	0	0	0	0	4084.25	1	1	46.8651	39.5882
DATA	2065	25	25	0	0	A_64_P079149	XM_001063529	10495.7	359.288	8.755155e+001	9.116331e+000	143.5	41	4.421238e+000	0	0	0	0	0	0	85.3471	1	1	48.2044	40.7879
DATA	2066	25	26	0	0	A_42_P507072	FQ213070	10521.1	359.575	1.444783e+003	1.445006e+002	1498	39.5	5.381553e+000	0	0	0	0	0	0	1408.77	1	1	52.0157	39.1944
DATA	2067	25	27	0	0	A_44_P314270	ENSRNOT00000015469	10546.3	359.662	1.351900e+002	1.375553e+001	194.5	39	7.959969e+000	0	0	0	0	0	0	131.823	1	1	48.5334	37.6944
DATA	2068	25	28	0	0	A_64_P026098	ENSRNOT00000027092	10571.9	359.614	6.591445e+001	7.064080e+000	127	41	7.753050e+000	0	0	0	0	0	0	64.2582	1	1	57.259	40.4643
DATA	2069	25	29	0	0	A_64_P018599	XM_229548	10597.6	359.448	2.551149e+000	2.541684e+000	59	39	9.619760e+000	0	0	0	0	0	0	-2.2607	0	0	45.835	38.8387
DATA	2070	25	30	0	0	A_43_P15907	NM_001134567	10622.5	360	3.348608e+001	4.204889e+000	96	38.5	7.494136e+000	0	0	0	0	0	0	32.6097	1	1	54.1152	38.9
DATA	2071	25	31	0	0	A_64_P151804	A_64_P151804	10647.7	359.941	6.631394e+001	7.103164e+000	128	39	1.310734e+001	0	0	0	0	0	0	64.5204	1	1	45.835	41.0625
DATA	2072	25	32	0	0	A_42_P642743	NM_017005	10673.1	359.901	5.730533e+003	5.730590e+002	5547	37	7.462473e+000	0	0	0	0	0	0	5569.26	1	1	46.8651	36.6333
DATA	2073	25	33	0	0	A_42_P630463	NM_022238	10698.8	359.873	1.674998e+002	1.694325e+001	215.5	44	1.018633e+001	0	0	0	0	0	0	162.563	1	1	46.8651	42.6571
DATA	2074	25	34	0	0	A_64_P119533	NM_001000351	10724.1	359.877	1.297454e+001	2.866345e+000	75	40	8.911561e+000	0	0	0	0	0	0	12.5723	1	1	46.1809	39.973
DATA	2075	25	35	0	0	A_64_P158068	FQ219182	10749.6	360	1.486591e+003	1.486812e+002	1491	41.5	1.114378e+001	0	0	0	0	0	0	1437.93	1	1	50.4627	42.9643
DATA	2076	25	36	0	0	A_64_P000779	XM_225838	10775.3	359.971	2.562920e+001	3.626476e+000	88	41	1.172824e+001	0	0	0	0	0	0	24.7397	1	1	46.1809	41.8621
DATA	2077	25	37	0	0	A_44_P630082	ENSRNOT00000020640	10800.3	359.897	1.413764e+002	1.436958e+001	202.5	40	9.788077e+000	0	0	0	0	0	0	136.17	1	1	45.835	41.8387
DATA	2078	25	38	0	0	A_42_P717654	XM_001063683	10825.3	360.123	2.172250e+003	2.172403e+002	2070	41	7.756718e+000	0	0	0	0	0	0	2087.27	1	1	48.5334	39.6
DATA	2079	25	39	0	0	A_42_P792382	NM_017257	10851.1	360.099	2.556219e+003	2.556349e+002	2480	41.5	9.018302e+000	0	0	0	0	0	0	2449.64	1	1	46.8651	40.9412
DATA	2080	25	40	0	0	A_64_P075035	NM_001001014	10876.6	360.028	1.320289e+002	1.345488e+001	188	42	6.826491e+000	0	0	0	0	0	0	126.163	1	1	48.2044	42.6207
DATA	2081	25	41	0	0	A_64_P021281	NM_001039022	10902.1	359.87	2.668839e+003	2.668966e+002	2607	43	7.250111e+000	0	0	0	0	0	0	2542.44	1	1	48.2044	41.1111
DATA	2082	25	42	0	0	A_44_P729533	TC581820	10927	359.774	2.954915e+003	2.955030e+002	2823	40.5	7.314858e+000	0	0	0	0	0	0	2806.04	1	1	45.4864	42.0833
DATA	2083	25	43	0	0	A_42_P802358	NM_001024341	10952.4	360.028	7.377882e+003	7.377929e+002	6888	41	7.967884e+000	0	0	0	0	0	0	6982.57	1	1	48.2044	41.7778
DATA	2084	25	44	0	0	A_42_P481087	XM_232226	10978	360.147	4.061714e+002	4.070196e+001	447	38.5	8.489023e+000	0	0	0	0	0	0	383.033	1	1	46.8651	37.5313
DATA	2085	25	45	0	0	A_42_P561597	NM_001106486	11003.5	360.151	3.733377e+003	3.733470e+002	3530	39	7.236147e+000	0	0	0	0	0	0	3507.54	1	1	47.8731	38.1481
DATA	2086	25	46	0	0	A_64_P113381	A_64_P113381	11029	360.455	4.973248e+000	2.692654e+000	68	36	6.804215e+000	0	0	0	0	0	0	4.65437	1	0	55.8519	37.2121
DATA	2087	25	47	0	0	A_64_P088695	NM_001134414	11054.1	360.352	7.433056e+002	7.437803e+001	734	38	8.778300e+000	0	0	0	0	0	0	692.869	1	1	47.8731	39.6757
DATA	2088	25	48	0	0	A_44_P728586	ENSRNOT00000013367	11079.4	360.103	8.834241e+002	8.838269e+001	884	40	8.558075e+000	0	0	0	0	0	0	820.043	1	1	46.5243	39.8235
DATA	2089	25	49	0	0	A_42_P544898	NM_001108279	11105	360.075	2.614630e+001	3.743879e+000	83.5	40	8.974238e+000	0	0	0	0	0	0	24.1659	1	1	46.8651	39.5862
DATA	2090	25	50	0	0	A_44_P432910	NM_012814	11130.6	360.427	9.541586e+004	9.541587e+003	89262.5	41	7.404227e+000	0	0	0	0	0	0	87803	1	1	57.5363	40.375
DATA	2091	25	51	0	0	A_64_P157820	XM_001079095	11156.1	359.943	7.345830e+001	7.827608e+000	129	43	9.706012e+000	0	0	0	0	0	0	67.2884	1	1	46.8651	44.04
DATA	2092	25	52	0	0	A_42_P601802	NM_134465	11181.1	360.127	1.720418e+003	1.720632e+002	1583	37	8.569011e+000	0	0	0	0	0	0	1568.85	1	1	46.8651	38.1935
DATA	2093	25	53	0	0	A_64_P039737	NM_001130508	11206.6	360.427	2.808401e+002	2.821624e+001	312	41.5	8.872700e+000	0	0	0	0	0	0	254.919	1	1	57.5363	42.2813
DATA	2094	25	54	0	0	A_42_P648800	AA998304	11232.3	360.5	6.785706e+001	7.318585e+000	120.5	41	7.041660e+000	0	0	0	0	0	0	61.3014	1	1	57.5363	40.6957
DATA	2095	25	55	0	0	A_64_P007009	ENSRNOT00000014567	11257.6	360.393	2.034717e+003	2.034903e+002	1900	42	7.173273e+000	0	0	0	0	0	0	1829.44	1	1	52.9257	41.0741
DATA	2096	25	56	0	0	A_64_P049527	TC606896	11282.9	360.232	2.110660e+002	2.128730e+001	250.5	43	6.292281e+000	0	0	0	0	0	0	188.866	1	1	46.5243	43.0303
DATA	2097	25	57	0	0	A_44_P281595	NM_001037556	11308.3	360.014	3.642720e+001	4.583020e+000	92	40	7.927345e+000	0	0	0	0	0	0	32.4392	1	1	49.1849	39.0303
DATA	2098	25	58	0	0	A_44_P374638	NM_024391	11333.6	360.362	1.128908e+002	1.162976e+001	160	33.5	7.106227e+000	0	0	0	0	0	0	100.059	1	1	47.5395	35.4615
DATA	2100	25	60	0	0	A_64_P046416	A_64_P046416	11384.7	360.348	5.190727e+001	5.907776e+000	107.5	40.5	1.018771e+001	0	0	0	0	0	0	45.5708	1	1	45.835	41.6842
DATA	2101	25	61	0	0	A_44_P428560	NM_001001358	11410.1	360.465	4.603617e+001	5.406077e+000	100	38	9.617775e+000	0	0	0	0	0	0	40.2292	1	1	48.2044	39.1111
DATA	2102	25	62	0	0	A_44_P208887	NM_001105774	11435.4	360.573	6.228510e+001	6.848377e+000	117.5	40	6.949839e+000	0	0	0	0	0	0	54.181	1	1	57.5363	40.3214
DATA	2103	25	63	0	0	A_42_P533792	NM_001106575	11460.5	360.377	4.090486e+003	4.090586e+002	3588	46	1.155379e+001	0	0	0	1	0	0	3542.42	1	1	49.8279	48.4815
DATA	2104	25	64	0	0	A_42_P802550	NM_017365	11486.1	360.5	1.843194e+002	1.865441e+001	220.5	42	1.092407e+001	0	0	0	0	0	0	158.925	1	1	56.9804	43.9091
DATA	2105	25	65	0	0	A_42_P545129	ENSRNOT00000007554	11511.2	360.356	6.391153e+002	6.397659e+001	606	38.5	8.908177e+000	0	0	0	0	0	0	548.748	1	1	48.5334	39.0882
DATA	2106	25	66	0	0	A_42_P500675	NM_013179	11536.8	360.529	3.076502e+002	3.090104e+001	326	40	9.792688e+000	0	0	0	0	0	0	263.08	1	1	47.2035	40.375
DATA	2107	25	67	0	0	A_44_P127238	NM_001127655	11561.9	360.5	3.927315e+002	3.938063e+001	396	41	1.110417e+001	0	0	0	0	0	0	334.544	1	1	47.8731	41.1429
DATA	2108	25	68	0	0	A_64_P042142	ENSRNOT00000027371	11587.3	360.917	8.347661e+001	8.842955e+000	133	43.5	9.102808e+000	0	0	0	0	0	0	70.8521	1	1	47.8731	44.75
DATA	2109	25	69	0	0	A_44_P279756	NM_022848	11613	360.545	1.412208e+001	3.251089e+000	72	40	9.353819e+000	0	0	0	0	0	0	11.9437	1	0	55.8519	41.0769
DATA	2110	25	70	0	0	A_64_P119597	NM_001106871	11638.5	360.648	1.050896e+001	3.120035e+000	69	40.5	9.172076e+000	0	0	0	0	0	0	8.85958	1	0	57.5363	40.8571
DATA	2111	25	71	0	0	A_44_P790674	NM_001191933	11663.7	360.474	2.135871e+001	3.639084e+000	80	40.5	1.132983e+001	0	0	0	0	0	0	17.9538	1	1	49.1849	43.0714
DATA	2112	25	72	0	0	A_44_P405618	ENSRNOT00000025426	11688.9	360.768	1.419750e+002	1.450153e+001	181	40.5	9.091337e+000	0	0	0	0	0	0	119.037	1	1	46.5243	42.8824
DATA	2113	25	73	0	0	A_42_P719478	NM_001191779	11714.5	360.648	3.276795e+000	2.978874e+000	63	40.5	7.220532e+000	0	0	0	1	0	0	2.74098	1	0	57.5363	39.8438
DATA	2114	25	74	0	0	A_64_P061424	A_64_P061424	11740.1	360.614	2.757811e+001	4.050469e+000	83	42	8.704165e+000	0	0	0	0	0	0	23.0234	1	1	57.259	41.9744
DATA	2115	25	75	0	0	A_44_P1042876	NM_212504	11765.2	360.753	1.328113e+003	1.328445e+002	1131	39	8.839560e+000	0	0	0	0	0	0	1107.08	1	1	48.2044	40.7429
DATA	2116	25	76	0	0	A_44_P470043	NM_001108103	11790.6	360.931	1.183796e+002	1.220593e+001	157	47	9.712002e+000	0	0	0	0	0	0	98.5676	1	1	53.8203	45.4333
DATA	2117	25	77	0	0	A_64_P108484	ENSRNOT00000046584	11816.1	360.833	4.020626e+001	5.002587e+000	93	40	8.853626e+000	0	0	0	0	0	0	33.4527	1	1	44.7812	39.3793
DATA	2118	25	78	0	0	A_42_P666065	NM_001014069	11841.2	360.884	3.093773e+002	3.108067e+001	317	40.5	6.794136e+000	0	0	0	0	0	0	257.348	1	1	46.5243	39.9688
DATA	2119	25	79	0	0	A_64_P136571	NM_001134545	11867	361	3.990723e+001	4.978540e+000	93.5	39	9.680820e+000	0	0	0	0	0	0	33.2047	1	1	54.9904	40.4194
DATA	2120	25	80	0	0	A_42_P816740	NM_001108705	11892.2	361	1.715012e+002	1.740612e+001	202	39	6.843068e+000	0	0	0	0	0	0	142.806	1	1	46.8651	39.5517
DATA	2121	25	81	0	0	A_64_P018142	NM_001100716	11917.8	360.877	1.458114e+002	1.488063e+001	181	42.5	9.231340e+000	0	0	0	0	0	0	121.574	1	1	47.5395	43.1579
DATA	2122	25	82	0	0	A_42_P779687	ENSRNOT00000034449	11943.1	360.786	3.111756e+003	3.111897e+002	2585.5	40	9.256550e+000	0	0	0	0	0	0	2599.42	1	1	46.5243	41.9394
DATA	2124	25	84	66	1	DarkCorner	DarkCorner	11994	361	2.958726e+000	2.947749e+000	59	42	8.496237e+000	0	0	0	0	0	0	0.00974063	0	0	54.9904	41
DATA	2125	25	85	66	1	DarkCorner	DarkCorner	12019.5	361.226	2.947110e+000	2.946529e+000	60.5	39	8.682405e+000	0	0	0	0	0	0	2.08167	0	0	43.3362	39.5574
DATA	2126	26	1	66	1	DarkCorner	DarkCorner	9898.58	366.086	2.693357e+000	2.683365e+000	60.5	36	8.386814e+000	0	0	0	0	0	0	-1.63197	0	0	50.4627	37.8043
DATA	2127	26	2	66	1	DarkCorner	DarkCorner	9924.42	366.573	2.683684e+000	2.673728e+000	56	40.5	6.388090e+000	0	0	0	0	0	0	-5.44876	0	0	57.5363	40.75
DATA	2128	26	3	0	0	A_42_P713844	NM_001106167	9949.58	366.573	3.050240e+002	3.061856e+001	338	40	8.242880e+000	0	0	0	0	0	0	283.51	1	1	57.5363	40.1515
DATA	2129	26	4	0	0	A_42_P627219	NM_001012468	9975.06	366.47	3.897286e+003	3.897377e+002	3640.5	41.5	8.517001e+000	0	0	0	0	0	0	3634.86	1	1	45.1352	41.0938
DATA	2130	26	5	0	0	A_42_P461003	NM_001044283	10000.3	367.029	5.720591e+003	5.720652e+002	5389	40.5	8.417276e+000	0	0	0	0	0	0	5353.86	1	1	46.1809	41.0357
DATA	2131	26	6	0	0	A_44_P1019923	NM_022522	10025.6	367.129	9.533634e+002	9.537281e+001	942.5	37	8.246326e+000	0	0	0	0	0	0	895.244	1	1	46.8651	39.7576
DATA	2132	26	7	0	0	A_42_P814056	NM_001108866	10051.3	366.868	3.801555e+003	3.801646e+002	3601	46	1.137636e+001	0	0	0	0	0	0	3581.55	1	1	49.8279	46.963
DATA	2133	26	8	0	0	A_42_P795269	NM_001134730	10076.6	367.09	3.252396e+003	3.252502e+002	3089	45	1.042818e+001	0	0	0	0	0	0	3074.03	1	1	46.1809	46.7391
DATA	2134	26	9	0	0	A_42_P763522	NM_001013980	10102	366.729	1.034880e+003	1.035210e+002	1054	40	8.018440e+000	0	0	0	0	0	0	981.125	1	1	46.8651	39.1538
DATA	2135	26	10	0	0	A_44_P292437	NM_153309	10127.5	366.778	1.286631e+002	1.312727e+001	186	42	8.693791e+000	0	0	0	0	0	0	122.349	1	1	47.8731	40.7857
DATA	2136	26	11	0	0	A_64_P065313	ENSRNOT00000042070	10152.9	366.614	7.051610e+001	7.514628e+000	131	42.5	8.398285e+000	0	0	0	0	0	0	67.2481	1	1	57.259	40.8824
DATA	2137	26	12	0	0	A_64_P008047	NM_001033670	10178.2	367	1.396844e+004	1.396847e+003	12829	46	8.978290e+000	0	0	0	0	0	0	13358.3	1	1	46.8651	45.0741
DATA	2138	26	13	0	0	A_64_P080612	TC638889	10203.7	367.086	2.389290e+003	2.389429e+002	2346	42.5	8.435912e+000	0	0	0	0	0	0	2290.96	1	1	49.5074	43.2692
DATA	2139	26	14	0	0	A_43_P17696	NM_001004257	10229	366.986	1.059769e+003	1.060083e+002	1100	41	8.057663e+000	0	0	0	0	0	0	1018.66	1	1	46.8651	42.5
DATA	2140	26	15	0	0	A_64_P019608	NM_001105713	10254.4	367.027	3.670817e+002	3.679807e+001	427	39	7.897065e+000	0	0	0	0	0	0	353.659	1	1	48.5334	40.6364
DATA	2141	26	16	0	0	A_64_P108575	ENSRNOT00000046600	10280	367	4.493057e+001	5.173722e+000	104	44	6.582806e+000	0	0	0	0	0	0	43.381	1	1	54.9904	43.8
DATA	2142	26	17	0	0	A_64_P136859	NM_001109642	10305.1	366.896	3.459971e+003	3.460066e+002	3427	37	6.730918e+000	0	0	0	0	0	0	3347.1	1	1	46.8651	36.6
DATA	2143	26	18	0	0	A_64_P021597	A_64_P021597	10330.5	367	1.224999e+001	2.833998e+000	76	38	6.783941e+000	0	0	0	0	0	0	11.8717	1	0	54.1152	37.0857
DATA	2144	26	19	0	0	A_64_P148032	A_64_P148032	10356.1	367.065	1.101577e+002	1.130739e+001	168.5	35.5	8.169018e+000	0	0	0	0	0	0	106.929	1	1	54.4085	37.9063
DATA	2145	26	20	0	0	A_42_P743580	NM_017214	10381.4	367	3.852669e+003	3.852753e+002	3789	43	7.571594e+000	0	0	0	0	0	0	3744.91	1	1	48.5334	41.9355
DATA	2146	26	21	0	0	A_42_P693964	NM_181087	10406.5	367.056	9.274202e+002	9.277693e+001	927	38	7.449700e+000	0	0	0	0	0	0	902.554	1	1	48.5334	39.9565
DATA	2147	26	22	0	0	A_44_P1058389	NM_012992	10431.9	367.214	7.529635e+003	7.529678e+002	6958	41.5	7.021805e+000	0	0	0	0	0	0	7335.15	1	1	46.8651	40.9333
DATA	2148	26	23	0	0	A_44_P135224	NM_022187	10457.4	367.116	1.013968e+002	1.045307e+001	160	37	8.219286e+000	0	0	0	0	0	0	98.8538	1	1	46.5243	38.16
DATA	2149	26	24	0	0	A_64_P070249	ENSRNOT00000048236	10482.7	367.114	5.166286e+002	5.172521e+001	581	41	8.551574e+000	0	0	0	0	0	0	503.954	1	1	46.8651	39.6
DATA	2150	26	25	0	0	A_42_P806899	NM_001108829	10508.1	366.776	2.566076e+001	3.609295e+000	86	41	4.847593e+000	0	0	0	0	0	0	25.0389	1	1	45.835	41.0286
DATA	2151	26	26	0	0	A_42_P465144	NM_001107714	10533.6	367.427	2.444655e+001	3.523651e+000	85	39	9.338612e+000	0	0	0	0	0	0	23.8587	1	1	57.5363	37.375
DATA	2152	26	27	0	0	A_43_P19712	NM_001106751	10559.5	367.079	1.574511e+001	2.986763e+000	79.5	41	7.820293e+000	0	0	0	0	0	0	15.3643	1	1	44.0646	39.9032
DATA	2153	26	28	0	0	A_42_P728472	NM_001007600	10584.4	366.773	6.421616e+003	6.421666e+002	6392	42	8.349719e+000	0	0	0	0	0	0	6264.03	1	1	45.835	41.303
DATA	2154	26	29	66	-1	(-)3xSLv1	NegativeControl	10609	367.621	2.549536e+000	2.540078e+000	57.5	39	6.940870e+000	0	0	0	0	0	0	-5.04621	0	0	45.4864	38.1351
DATA	2155	26	30	0	0	A_42_P629394	NM_031683	10635	367.343	1.261863e+003	1.262119e+002	1240	41	9.656285e+000	0	0	0	0	0	0	1229.34	1	1	45.4864	43.6207
DATA	2156	26	31	0	0	A_64_P041977	A_64_P041977	10660.9	367	5.193844e+001	5.783815e+000	114	38	9.651540e+000	0	0	0	0	0	0	50.5456	1	1	46.8651	39.4063
DATA	2157	26	32	0	0	A_44_P126406	XM_228958	10686.1	367.373	3.034343e+003	3.034450e+002	3018	41	1.135460e+001	0	0	0	0	0	0	2949.47	1	1	45.835	43
DATA	2158	26	33	0	0	A_64_P021878	NM_001167664	10712	367.121	5.176616e+001	5.771395e+000	115	41	1.306680e+001	0	0	0	0	0	0	50.2418	1	1	46.5243	41.7931
DATA	2159	26	34	0	0	A_64_P058719	NM_001014175	10736.8	367.116	2.961232e+003	2.961342e+002	2923	39.5	1.039107e+001	0	0	0	0	0	0	2869.32	1	1	46.5243	40.8421
DATA	2160	26	35	0	0	A_42_P495579	NM_001107564	10762.2	367.071	1.114183e+002	1.143235e+001	166	44	1.203978e+001	0	0	0	0	0	0	107.754	1	1	46.5243	45.7941
DATA	2161	26	36	0	0	A_64_P054979	NM_001109615	10787.8	367.143	5.293824e+001	5.883069e+000	112	40	1.217109e+001	0	0	0	0	0	0	51.0888	1	1	45.1352	43.7241
DATA	2162	26	37	0	0	A_44_P713838	ENSRNOT00000032874	10813.3	367.5	6.108227e+001	6.627726e+000	120	44	1.219515e+001	0	0	0	0	0	0	58.8128	1	1	57.5363	46.3103
DATA	2163	26	38	0	0	A_64_P158913	NM_001108101	10838.7	367.775	1.009543e+001	2.769227e+000	71	41	8.805693e+000	0	0	0	0	0	0	9.6961	1	0	52.3208	41.6667
DATA	2164	26	39	0	0	A_43_P13018	NM_054004	10863.6	367.562	7.020813e+003	7.020861e+002	6785.5	42	7.222575e+000	0	0	0	0	0	0	6724.83	1	1	48.2044	42.9677
DATA	2165	26	40	0	0	A_64_P114383	A_64_P114383	10889.1	367.382	9.248758e+003	9.248794e+002	8809.5	45	7.749008e+000	0	0	0	0	0	0	8832.69	1	1	46.1809	43.7667
DATA	2166	26	41	0	0	A_43_P16629	XM_001080634	10914.4	367.07	2.315309e+003	2.315455e+002	2228.5	40	7.772214e+000	0	0	0	0	0	0	2204.19	1	1	48.2044	40.6765
DATA	2167	26	42	0	0	A_42_P810313	NM_001108677	10940.3	367.5	6.821904e+001	7.304195e+000	128	41	7.351980e+000	0	0	0	0	0	0	64.7299	1	1	57.5363	41.4194
DATA	2168	26	43	0	0	A_42_P537516	NM_001106023	10965.3	367.246	5.111781e+003	5.111848e+002	4866	39	8.599480e+000	0	0	0	0	0	0	4833.62	1	1	45.1352	39.3929
DATA	2169	26	44	0	0	A_64_P006964	A_64_P006964	10990.9	367.246	9.480676e+001	9.838393e+000	151	39	9.877995e+000	0	0	0	0	0	0	89.3184	1	1	42.9674	38.6857
DATA	2170	26	45	0	0	A_42_P829251	NM_133381	11016.4	367.573	7.678277e+000	2.748211e+000	68.5	38	5.013941e+000	0	0	0	0	0	0	7.20654	1	0	57.5363	37.2963
DATA	2171	26	46	0	0	A_42_P687443	NM_020100	11041.4	367.603	8.070435e+001	8.494070e+000	139	39.5	1.045068e+001	0	0	0	0	0	0	75.453	1	1	50.1463	41.5938
DATA	2172	26	47	0	0	A_44_P196146	NM_031349	11067.1	367.5	1.149461e+002	1.179839e+001	169.5	41	8.476165e+000	0	0	0	0	0	0	107.021	1	1	56.9804	41.5143
DATA	2173	26	48	0	0	A_64_P050137	ENSRNOT00000058586	11092.4	367.873	1.535045e+002	1.558111e+001	208	39	9.182264e+000	0	0	0	0	0	0	142.329	1	1	47.5395	39.7742
DATA	2174	26	49	0	0	A_44_P637827	NM_001108797	11117.9	367.5	1.949939e+003	1.950123e+002	1783	41	8.754486e+000	0	0	0	0	0	0	1800.05	1	1	56.9804	41.5556
DATA	2175	26	50	0	0	A_64_P070073	NM_001109590	11143.4	367.573	8.805632e+001	9.208761e+000	144	45	6.702583e+000	0	0	0	0	0	0	80.927	1	1	65	44.2692
DATA	2176	26	51	0	0	A_64_P130572	NM_001109400	11168.5	367.5	5.371551e+002	5.378367e+001	554.5	39.5	8.789713e+000	0	0	0	0	0	0	491.459	1	1	49.1849	40.2917
DATA	2177	26	52	0	0	A_42_P658815	NM_198745	11193.7	367.618	9.031855e+002	9.035947e+001	860	40	7.853898e+000	0	0	0	0	0	0	822.602	1	1	46.5243	40.9394
DATA	2179	26	54	0	0	A_43_P14809	TC581403	11244.6	367.806	5.264305e+002	5.271456e+001	542	43	1.031056e+001	0	0	0	0	0	0	474.988	1	1	47.8731	44.3333
DATA	2180	26	55	0	0	A_42_P553319	TC597248	11270.4	367.573	5.537928e+001	6.186820e+000	111.5	41	8.915640e+000	0	0	0	0	0	0	49.7249	1	1	57.5363	41.3636
DATA	2181	26	56	0	0	A_64_P004162	NM_019139	11295.5	368	9.791220e+000	2.939035e+000	69	40	7.894465e+000	0	0	0	0	0	0	8.75069	1	0	47.2035	41.25
DATA	2182	26	57	0	0	A_64_P032450	NM_172330	11320.9	367.46	1.600739e+002	1.624779e+001	206	35	8.057502e+000	0	0	0	0	0	0	142.369	1	1	44.0646	37.44
DATA	2183	26	58	0	0	A_44_P470976	NM_001013133	11346.3	367.677	4.065197e+001	4.934942e+000	97	39	7.747922e+000	0	0	0	0	0	0	35.9853	1	1	45.835	37.303
DATA	2184	26	59	0	0	A_64_P166428	NM_001037205	11371.5	367.735	7.609728e+001	8.112298e+000	128	43	9.150842e+000	0	0	0	0	0	0	67.0473	1	1	46.5243	42.5625
DATA	2185	26	60	0	0	A_43_P11576	NM_012821	11397.5	368	1.504114e+001	3.199871e+000	75	43	9.754568e+000	0	0	0	0	0	0	13.1896	1	1	54.1152	43.8611
DATA	2186	26	61	0	0	A_64_P156910	A_64_P156910	11422.3	367.97	1.334180e+002	1.364011e+001	174	40	7.727024e+000	0	0	0	0	0	0	116.468	1	1	45.835	40.7241
DATA	2187	26	62	0	0	A_64_P126140	NM_001191648	11448	368	6.213927e+001	6.836364e+000	117	39	1.075339e+001	0	0	0	0	0	0	53.9975	1	1	54.9904	39.5926
DATA	2188	26	63	0	0	A_42_P637122	NM_001108351	11473	368	1.068518e+003	1.068902e+002	951	43.5	1.095868e+001	0	0	0	0	0	0	924.488	1	1	46.8651	45.2941
DATA	2189	26	64	0	0	A_64_P081208	NM_001009712	11498.5	368.023	4.973517e+003	4.973600e+002	4323	39.5	8.945814e+000	0	0	0	0	0	0	4284.64	1	1	49.8279	40.2
DATA	2190	26	65	0	0	A_42_P465608	NM_130894	11523.9	367.969	1.684288e+003	1.684535e+002	1527	44	1.248110e+001	0	0	0	0	0	0	1445	1	1	45.835	45
DATA	2191	26	66	0	0	A_42_P485589	NM_017246	11549.2	367.882	1.022317e+002	1.062606e+001	149.5	41	1.001590e+001	0	0	0	0	0	0	87.3601	1	1	46.5243	40.5455
DATA	2192	26	67	0	0	A_64_P031383	NM_020308	11575.1	367.754	3.596712e+002	3.608461e+001	372.5	46	1.052999e+001	0	0	0	0	0	0	306.163	1	1	46.5243	45.4545
DATA	2193	26	68	0	0	A_44_P220647	NM_001107097	11599.8	368	7.286233e+001	7.849374e+000	122.5	44	9.096992e+000	0	0	0	0	0	0	61.8101	1	1	45.4864	43.4595
DATA	2194	26	69	0	0	A_44_P294687	NM_080885	11625.6	367.957	2.276892e+002	2.295659e+001	253	39	9.387393e+000	0	0	0	1	0	0	192.5	1	1	46.8651	39.1379
DATA	2195	26	70	0	0	A_42_P512838	NM_001106884	11650.6	367.901	4.859055e+002	4.867930e+001	468	37	7.361124e+000	0	0	0	0	0	0	409.573	1	1	47.8731	39.1154
DATA	2196	26	71	0	0	A_42_P635228	NM_001107651	11676.4	368.127	4.335250e+001	5.241715e+000	97	39	5.837056e+000	0	0	0	0	0	0	36.4409	1	1	47.5395	40.0741
DATA	2197	26	72	0	0	A_44_P254687	NM_001105728	11701.9	368.386	9.285732e+001	9.744133e+000	138	40	7.769404e+000	0	0	0	0	0	0	77.8646	1	1	57.259	39.6364
DATA	2198	26	73	0	0	A_64_P049628	NM_001169145	11727	367.774	2.400687e+003	2.400870e+002	2075.5	39	7.174735e+000	0	0	0	0	0	0	2008.66	1	1	45.4864	38.0882
DATA	2199	26	74	0	0	A_64_P007703	NM_031674	11752.6	368.427	7.171839e+001	7.760530e+000	121	38	8.729072e+000	0	0	0	0	0	0	59.9083	1	1	57.5363	39.4324
DATA	2200	26	75	0	0	A_42_P645376	NM_001014135	11777.9	368.086	1.816346e+004	1.816348e+003	15165	44	8.125251e+000	0	0	0	0	0	0	15151.1	1	1	46.8651	43.6552
DATA	2201	26	76	0	0	A_64_P040920	XM_577408	11803	367.774	2.213721e+003	2.213921e+002	1941	39.5	1.102993e+001	0	0	0	0	0	0	1844.77	1	1	45.4864	41.5526
DATA	2202	26	77	0	0	A_42_P819656	NM_130409	11828.6	367.972	1.378563e+003	1.378883e+002	1193	38	4.795832e+000	0	0	0	1	0	0	1148.28	1	1	48.2044	38.3333
DATA	2203	26	78	0	0	A_64_P018921	NM_001135012	11854	368.104	2.259248e+002	2.278729e+001	252	39	9.856278e+000	0	0	0	0	0	0	188.19	1	1	46.8651	39.8286
DATA	2204	26	79	0	0	A_43_P15253	NM_012967	11879.5	368.13	1.893203e+002	1.916385e+001	215.5	39	8.893274e+000	0	0	0	0	0	0	157.78	1	1	47.2035	41.9032
DATA	2205	26	80	0	0	A_64_P093063	NM_001136272	11904.8	368.141	2.000494e+002	2.022401e+001	226	42	8.674356e+000	0	0	0	0	0	0	166.895	1	1	45.835	42.1111
DATA	2206	26	81	0	0	A_44_P477406	NM_012751	11930.5	368.111	1.972043e+002	1.994190e+001	224.5	41.5	9.585761e+000	0	0	0	0	0	0	164.79	1	1	47.8731	40.8529
DATA	2207	26	82	0	0	A_64_P056816	NM_001100697	11955.7	368.5	7.448828e+001	8.014315e+000	122.5	44	1.033539e+001	0	0	0	0	0	0	62.3868	1	1	65	44.0345
DATA	2208	26	83	0	0	A_42_P580733	NM_001006981	11981.1	368.26	3.141278e+003	3.141416e+002	2671	39.5	7.518545e+000	0	0	0	0	0	0	2638.34	1	1	47.8731	40.3235
DATA	2209	26	84	66	1	DarkCorner	DarkCorner	12006.1	368.797	3.467044e+000	2.958665e+000	61.5	42	8.453332e+000	0	0	0	0	0	0	2.92234	1	0	46.5243	42.2
DATA	2210	26	85	66	1	DarkCorner	DarkCorner	12032.3	368.695	2.936449e+000	2.926385e+000	61	36	8.423799e+000	0	0	0	0	0	0	0.590101	0	0	51.4001	36.3029
DATA	2211	27	1	66	1	DarkCorner	DarkCorner	9886.5	374	2.694393e+000	2.684397e+000	57	36	7.475430e+000	0	0	0	0	0	0	-3.95263	0	0	54.1152	36.5081
DATA	2212	27	2	66	1	DarkCorner	DarkCorner	9911.07	373.75	2.685583e+000	2.675619e+000	57	40	8.392874e+000	0	0	0	0	0	0	-5.1055	0	0	48.2044	40.9714
DATA	2213	27	3	0	0	A_44_P289922	NM_139103	9936.77	373.884	1.668648e+002	1.689816e+001	214	40	6.980991e+000	0	0	0	0	0	0	154.997	1	1	46.5243	41.3514
DATA	2214	27	4	0	0	A_64_P117149	ENSRNOT00000065538	9962.2	373.561	9.492412e+000	2.821753e+000	71	41	8.662985e+000	0	0	0	0	0	0	8.8471	1	0	45.4864	41.2258
DATA	2215	27	5	0	0	A_42_P524308	NM_019213	9987.74	373.945	6.712455e+002	6.717676e+001	674.5	42.5	8.943370e+000	0	0	0	0	0	0	627.787	1	1	47.8731	41.625
DATA	2216	27	6	0	0	A_64_P037562	XM_001070892	10013.5	374	2.823463e+002	2.835770e+001	330.5	40.5	1.029485e+001	0	0	0	0	0	0	264.967	1	1	54.1152	41.375
DATA	2217	27	7	0	0	A_44_P267706	XR_085883	10039	374.189	9.737877e+000	2.804791e+000	71	44	1.055706e+001	0	0	0	0	0	0	9.16896	1	0	47.2035	45.4194
DATA	2218	27	8	0	0	A_64_P082569	XM_001053354	10064	374	6.742460e+000	2.707360e+000	69	45	1.022660e+001	0	0	0	0	0	0	6.36855	1	0	65	46.6
DATA	2219	27	9	0	0	A_64_P000539	NM_053930	10089.4	373.823	6.631745e+003	6.631796e+002	6222	44	1.100856e+001	0	0	0	0	0	0	6283.53	1	1	49.5074	45.6667
DATA	2220	27	10	0	0	A_43_P22124	NM_213625	10114.7	373.929	8.080427e+002	8.084628e+001	831	40	8.495097e+000	0	0	0	0	0	0	767.945	1	1	46.8651	37.9167
DATA	2221	27	11	0	0	A_44_P1012556	NM_001013988	10140.1	373.783	5.907644e+001	6.453825e+000	118	41	8.404694e+000	0	0	0	0	0	0	56.3087	1	1	46.1809	39.75
DATA	2222	27	12	0	0	A_64_P115457	NM_001106361	10165.4	373.779	7.229980e+001	7.680275e+000	131	40.5	1.000377e+001	0	0	0	0	0	0	69.1052	1	1	46.5243	41.6538
DATA	2223	27	13	0	0	A_64_P064229	A_64_P064229	10191.1	374.386	1.603449e+001	3.041020e+000	79	48	9.190965e+000	0	0	0	0	0	0	15.3687	1	1	57.259	46.0769
DATA	2224	27	14	0	0	A_64_P039066	ENSRNOT00000041345	10216.5	373.944	4.150783e+001	4.885972e+000	99.5	40	7.519964e+000	0	0	0	0	0	0	39.8831	1	1	48.5334	40.6296
DATA	2225	27	15	0	0	A_42_P574960	ENSRNOT00000068719	10241.6	374.441	3.112189e+002	3.122793e+001	360	42	8.029917e+000	0	0	0	0	0	0	299.759	1	1	46.8651	43.2903
DATA	2226	27	16	0	0	A_42_P600215	NM_175844	10267.4	374.427	2.536552e+001	3.607793e+000	88	39	5.837281e+000	0	0	0	0	0	0	24.4865	1	1	65	38.9231
DATA	2227	27	17	0	0	A_42_P607770	NM_001134616	10292.4	373.735	4.112336e+003	4.112415e+002	3882	44.5	1.293465e+001	0	0	0	0	0	0	3977.5	1	1	46.5243	46.6
DATA	2228	27	18	0	0	A_64_P003348	NM_001077660	10317.6	373.912	3.103788e+002	3.114293e+001	357	38	6.158421e+000	0	0	0	0	0	0	300.768	1	1	46.1809	36.6154
DATA	2229	27	19	0	0	A_64_P057828	A_64_P057828	10343.4	374.427	5.944939e+002	5.950411e+001	638	37	7.952379e+000	0	0	0	0	0	0	577.104	1	1	57.5363	37.6286
DATA	2230	27	20	0	0	A_64_P081765	NM_134355	10368.6	374.427	2.807983e+001	3.791384e+000	89	43	9.925647e+000	0	0	0	0	0	0	27.2987	1	1	57.5363	42.0385
DATA	2231	27	21	0	0	A_42_P758886	NM_019258	10394.2	373.985	5.696131e+002	5.701811e+001	632	43	7.517959e+000	0	0	0	0	0	0	554.464	1	1	46.1809	42.6552
DATA	2232	27	22	0	0	A_42_P745470	XM_001066818	10419.3	374.413	4.174404e+003	4.174482e+002	4026	38.5	8.113349e+000	0	0	0	0	0	0	4067.94	1	1	48.8603	38.9667
DATA	2233	27	23	0	0	A_42_P800949	NM_031787	10444.7	374.1	1.119387e+002	1.147827e+001	170	37	8.135929e+000	0	0	0	0	0	0	109.176	1	1	46.8651	36.88
DATA	2234	27	24	0	0	A_42_P738559	NM_012801	10470.1	374.389	6.239798e+003	6.239849e+002	6147.5	39	6.503125e+000	0	0	0	0	0	0	6090.07	1	1	48.2044	40.1724
DATA	2235	27	25	0	0	A_42_P749550	NM_001109359	10495.8	374.182	1.647313e+003	1.647508e+002	1681.5	41	7.572297e+000	0	0	0	0	0	0	1608.48	1	1	52.9257	38.5556
DATA	2236	27	26	0	0	A_64_P007493	ENSRNOT00000006658	10521.1	374.029	2.155527e+001	3.328230e+000	84	40	7.998611e+000	0	0	0	0	0	0	21.0516	1	1	46.8651	38.7222
DATA	2237	27	27	0	0	A_64_P056182	NM_053363	10546.3	374.239	1.338830e+003	1.339070e+002	1340	37	7.849194e+000	0	0	0	0	0	0	1307.59	1	1	47.2035	36.2121
DATA	2238	27	28	0	0	A_42_P818546	NM_001191600	10571.9	374.5	3.091682e+002	3.102068e+001	362.5	43.5	8.827879e+000	0	0	0	0	0	0	301.896	1	1	56.9804	42.9375
DATA	2239	27	29	0	0	A_44_P407948	XM_001055260	10597.2	374	2.653410e+001	3.671486e+000	90	39	8.329397e+000	0	0	0	0	0	0	25.8972	1	1	46.8651	39.425
DATA	2240	27	30	66	-1	(-)3xSLv1	NegativeControl	10622.7	374.274	2.548644e+000	2.539189e+000	58	38.5	8.183333e+000	0	0	0	0	0	0	-3.88967	0	0	44.4243	38.6786
DATA	2241	27	31	0	0	A_64_P044505	NM_031587	10647.7	374.487	1.738864e+002	1.757337e+001	228.5	40	9.281716e+000	0	0	0	0	0	0	169.459	1	1	49.1849	39.3103
DATA	2242	27	32	0	0	A_42_P685138	NM_153621	10673.3	374.587	2.378406e+002	2.391975e+001	300.5	38	1.044060e+001	0	0	0	1	0	0	231.526	1	1	48.8603	40.4878
DATA	2243	27	33	0	0	A_64_P121747	ENSRNOT00000050332	10698.8	374.069	1.282105e+001	2.852188e+000	77.5	38	1.009135e+001	0	0	0	0	0	0	12.4631	1	1	46.8651	40.1795
DATA	2244	27	34	0	0	A_42_P791436	NM_012750	10724	374.423	5.504731e+002	5.510641e+001	592	36	9.044893e+000	0	0	0	0	0	0	534.297	1	1	47.8731	37.8857
DATA	2245	27	35	0	0	A_44_P349309	NM_001100890	10749.4	374.551	3.065204e+002	3.075844e+001	360	40.5	1.185734e+001	0	0	0	0	0	0	296.986	1	1	47.2035	42.3214
DATA	2246	27	36	0	0	A_42_P502621	NM_024401	10774.6	374.847	3.382402e+001	4.242647e+000	96	45	1.136775e+001	0	0	0	0	0	0	32.7082	1	1	47.8731	45.3226
DATA	2247	27	37	0	0	A_43_P21574	NM_001012043	10800.5	374.457	6.246315e+001	6.753233e+000	121	40	8.198581e+000	0	0	0	0	0	0	60.2636	1	1	47.2035	41.4063
DATA	2248	27	38	0	0	A_44_P496331	NM_001001085	10825.6	374.387	2.363491e+001	3.493929e+000	84	39	9.048855e+000	0	0	0	0	0	0	22.7479	1	1	44.0646	40.8966
DATA	2249	27	39	0	0	A_64_P016503	ENSRNOT00000003659	10851.4	374.573	8.719931e+001	9.093615e+000	143.5	41	7.253197e+000	0	0	0	0	0	0	83.7048	1	1	57.5363	40.6875
DATA	2250	27	40	0	0	A_43_P13270	NM_134415	10876.4	374.705	8.433754e+003	8.433794e+002	7865	46	6.554245e+000	0	0	0	0	0	0	8073.44	1	1	50.4627	45.3793
DATA	2251	27	41	0	0	A_42_P553960	NM_001107831	10901.9	374.38	3.999581e+003	3.999665e+002	3823	45.5	8.065037e+000	0	0	0	0	0	0	3816.98	1	1	47.2035	45.3
DATA	2252	27	42	0	0	A_44_P428997	NM_001107661	10927.1	374.5	1.970998e+002	1.988116e+001	242	43	8.961992e+000	0	0	0	0	0	0	187.507	1	1	48.5334	44.125
DATA	2253	27	43	0	0	A_42_P619926	NM_001106578	10952.7	374.77	3.557400e+001	4.413447e+000	92.5	38.5	1.071333e+001	0	0	0	0	0	0	33.7285	1	1	48.8603	37.4167
DATA	2255	27	45	0	0	A_44_P524471	NM_001106408	11003.6	374.926	4.391677e+002	4.399552e+001	463.5	35	6.590596e+000	0	0	0	0	0	0	413.373	1	1	46.1809	35.3103
DATA	2256	27	46	0	0	A_43_P10009	XM_347035	11029.2	374.916	2.570657e+003	2.570793e+002	2513	40	9.998740e+000	0	0	0	0	0	0	2410.25	1	1	49.8279	43.6563
DATA	2257	27	47	0	0	A_64_P068112	A_64_P068112	11054.7	375	4.618791e+003	4.618867e+002	4452	38.5	8.803093e+000	0	0	0	0	0	0	4313.22	1	1	49.1849	40.1389
DATA	2258	27	48	0	0	A_44_P191715	NM_021666	11079.8	374.733	7.097299e+000	2.756014e+000	68	41	7.473825e+000	0	0	0	0	0	0	6.6005	1	0	48.2044	40.5161
DATA	2259	27	49	0	0	A_64_P035769	NM_001108962	11105.3	374.754	1.387495e+003	1.387752e+002	1357	34	9.182737e+000	0	0	0	0	0	0	1284.87	1	1	45.1352	37.4138
DATA	2260	27	50	0	0	A_64_P158469	XM_579990	11130.5	375	1.019671e+001	2.873044e+000	74	42.5	7.695853e+000	0	0	0	0	0	0	9.40194	1	0	54.1152	42.8846
DATA	2261	27	51	0	0	A_43_P12811	NM_053464	11156	375	9.734352e+002	9.738090e+001	971	42	9.216703e+000	0	0	0	0	0	0	893.544	1	1	54.9904	42.0476
DATA	2262	27	52	0	0	A_44_P370694	NM_001107961	11181.5	374.692	1.701643e+001	3.200415e+000	77	39	8.375335e+000	0	0	0	0	0	0	15.5481	1	1	45.1352	40.2903
DATA	2263	27	53	0	0	A_42_P749550	NM_001109359	11206.6	374.972	1.702582e+003	1.702800e+002	1598	38	4.809802e+000	0	0	0	0	0	0	1548.63	1	1	48.2044	39.0909
DATA	2264	27	54	0	0	A_64_P125893	ENSRNOT00000021391	11231.8	374.806	8.747787e+003	8.747830e+002	7931	40	1.016389e+001	0	0	0	0	0	0	7919.71	1	1	47.5395	41.7692
DATA	2265	27	55	0	0	A_44_P1000653	NM_031531	11257.6	375.103	1.346550e+002	1.374317e+001	184	44	9.839431e+000	0	0	0	0	0	0	121.331	1	1	46.5243	43.2424
DATA	2266	27	56	0	0	A_64_P035992	A_64_P035992	11283.1	375.104	1.388729e+002	1.415925e+001	187	42	8.272931e+000	0	0	0	0	0	0	124.535	1	1	46.8651	42.2
DATA	2267	27	57	0	0	A_42_P592385	NM_022935	11308.7	374.914	4.329091e+000	2.808709e+000	65	40	7.743741e+000	0	0	0	0	0	0	3.86345	1	0	43.3362	39.4138
DATA	2268	27	58	0	0	A_64_P065624	ENSRNOT00000039260	11333.5	374.837	9.364803e+000	2.941178e+000	71	34.5	7.986316e+000	0	0	0	0	0	0	8.31868	1	0	39.4933	35.3438
DATA	2269	27	59	0	1	ERCC-00097_63	ERCC-00097_63	11359.1	374.841	2.834746e+001	3.985464e+000	88	40	7.515403e+000	0	0	0	0	0	0	25.0608	1	1	45.4864	39.9412
DATA	2270	27	60	0	0	A_42_P477625	NM_001108719	11384.1	374.672	1.691039e+003	1.691273e+002	1537.5	42	9.711513e+000	0	0	0	0	0	0	1488.06	1	1	45.1352	42.4722
DATA	2271	27	61	0	0	A_42_P788030	NM_031618	11409.8	374.785	1.019719e+004	1.019723e+003	9019	41.5	9.665312e+000	0	0	0	0	0	0	8931.43	1	1	45.1352	42.3056
DATA	2272	27	62	0	0	A_44_P278247	XM_219377	11435	375.127	3.492075e+003	3.492191e+002	2969	39.5	9.126254e+000	0	0	0	0	0	0	3044.94	1	1	46.8651	40.4333
DATA	2273	27	63	0	0	A_44_P189262	NM_024000	11460.5	375.254	9.017008e+003	9.017053e+002	7793	45	1.390139e+001	0	0	0	0	0	0	7827.58	1	1	47.5395	45.9655
DATA	2274	27	64	0	0	A_44_P212850	NM_019305	11486	375.455	2.748674e+001	3.970589e+000	83	42	1.173115e+001	0	0	0	0	0	0	23.7578	1	1	65	44.1563
DATA	2275	27	65	0	0	A_64_P144278	NM_001106525	11511.2	374.703	5.910873e+003	5.910944e+002	5125	41	1.066408e+001	0	0	0	0	0	0	5087.07	1	1	45.1352	42.5484
DATA	2276	27	66	0	0	A_44_P683816	NM_001127488	11536.6	374.919	1.070439e+002	1.108747e+001	150	48	1.061948e+001	0	0	0	0	0	0	91.7564	1	1	44.0646	45.24
DATA	2277	27	67	0	0	A_64_P048712	A_64_P048712	11562.4	375.427	4.761222e+001	5.575076e+000	102	41	1.044774e+001	0	0	0	0	0	0	40.6563	1	1	57.5363	40.7179
DATA	2278	27	68	0	0	A_64_P012813	NM_001106456	11587.2	374.984	1.498688e+001	3.274100e+000	73	48	9.794178e+000	0	0	0	0	0	0	12.7509	1	1	45.4864	48.1852
DATA	2280	27	70	0	0	A_42_P598602	NM_001077646	11638.4	375.535	3.064050e+001	4.239593e+000	87	40	9.836471e+000	0	0	0	0	0	0	25.8983	1	1	47.8731	40.5517
DATA	2281	27	71	0	0	A_44_P375380	NM_001191572	11663.5	375.362	6.625033e+001	7.247543e+000	116.5	37	9.991825e+000	0	0	0	0	0	0	55.8343	1	1	47.5395	41.3548
DATA	2282	27	72	0	0	A_64_P113555	NM_001000025	11689	375	1.103922e+001	3.146553e+000	68	42	8.173880e+000	0	0	0	0	0	0	9.27875	1	0	44.0646	41.4865
DATA	2283	27	73	0	0	A_42_P590466	NM_001009676	11714.3	375.221	1.608135e+003	1.608406e+002	1393	41	1.058331e+001	0	0	0	0	0	0	1348.67	1	1	46.5243	43.1613
DATA	2284	27	74	0	0	A_44_P224987	XM_001058317	11740.1	375.5	4.027079e+001	4.997160e+000	94	40.5	9.350155e+000	0	0	0	0	0	0	33.709	1	1	56.9804	41.0556
DATA	2285	27	75	0	0	A_42_P557315	NM_001106280	11765.3	376.034	2.128010e+003	2.128216e+002	1812.5	38.5	9.195897e+000	0	0	0	0	0	0	1778.71	1	1	43.7019	39.875
DATA	2286	27	76	0	0	A_44_P375364	A_44_P375364	11790.7	375.5	1.556719e+001	3.350277e+000	74.5	42	9.511854e+000	0	0	0	0	0	0	12.996	1	1	57.5363	40.2414
DATA	2287	27	77	0	0	A_44_P880152	NM_031553	11816.3	375.313	1.101942e+002	1.141234e+001	150	39	8.726368e+000	0	0	0	0	0	0	91.9258	1	1	46.1809	39.3953
DATA	2288	27	78	0	0	A_64_P057575	NM_001191967	11841.7	375.421	9.010224e+001	9.486931e+000	134	38	6.894876e+000	0	0	0	0	0	0	75.1488	1	1	49.5074	37.5938
DATA	2289	27	79	0	0	A_64_P122183	ENSRNOT00000009823	11867	375.545	2.385706e+001	3.808454e+000	79.5	40	1.076831e+001	0	0	0	0	0	0	19.9034	1	1	55.8519	42.6486
DATA	2290	27	80	0	0	A_64_P057587	NM_019313	11892.4	375.573	4.188539e+001	5.132511e+000	96.5	40.5	8.493695e+000	0	0	0	0	0	0	34.9716	1	1	57.5363	40.9286
DATA	2291	27	81	0	0	A_42_P480769	XM_001081609	11917.6	375.573	2.347899e+002	2.366513e+001	257	41	9.931215e+000	0	0	0	0	0	0	196.294	1	1	65	42.125
DATA	2292	27	82	0	0	A_42_P623151	NM_031026	11943	375.347	8.325947e+003	8.325999e+002	6846	38	9.592714e+000	0	0	0	1	0	0	6973.9	1	1	48.5334	39.5429
DATA	2293	27	83	0	0	A_42_P550241	NM_022954	11968.7	374.797	1.166190e+001	3.171690e+000	69	40.5	9.273401e+000	0	0	0	0	0	0	9.79228	1	0	48.5334	42.0625
DATA	2294	27	84	66	1	DarkCorner	DarkCorner	11994	375.545	2.950673e+000	2.939757e+000	59.5	41.5	8.275610e+000	0	0	0	0	0	0	0.114022	0	0	55.8519	40.8333
DATA	2295	27	85	66	1	DarkCorner	DarkCorner	12019	375.471	3.806964e+000	2.953211e+000	64	38.5	9.089169e+000	0	0	0	0	0	0	3.2195	1	0	46.8651	40.0714
DATA	2296	28	1	66	1	DarkCorner	DarkCorner	9899	381.455	2.686723e+000	2.676755e+000	59	37	8.169480e+000	0	0	0	0	0	0	-3.75246	0	0	65	37.4474
DATA	2297	28	2	0	0	A_42_P802550	NM_017365	9924.42	381.427	1.732219e+002	1.752640e+001	224	41	8.142406e+000	0	0	0	0	0	0	160.818	1	1	57.5363	41.4146
DATA	2299	28	4	0	0	A_42_P619926	NM_001106578	9974.77	381.292	3.679913e+001	4.534698e+000	99	39	9.129367e+000	0	0	0	0	0	0	34.3938	1	1	45.1352	40.6486
DATA	2300	28	5	0	0	A_64_P052441	ENSRNOT00000004876	10000.6	381.427	3.404725e+001	4.308827e+000	94.5	37	9.897172e+000	0	0	0	0	0	0	31.9309	1	1	57.5363	39.3333
DATA	2301	28	6	0	0	A_64_P056823	CA510211	10026	381.455	1.992155e+001	3.300995e+000	80	43.5	8.072882e+000	0	0	0	0	0	0	18.7451	1	1	55.8519	42.1667
DATA	2302	28	7	0	0	A_42_P669870	NM_001011919	10051.3	381.627	1.553882e+003	1.554103e+002	1501	43	8.682268e+000	0	0	0	0	0	0	1466.86	1	1	49.1849	43.8966
DATA	2303	28	8	0	0	A_42_P683634	NM_012946	10076.7	381.5	2.760464e+004	2.760466e+003	26375.5	43	7.757564e+000	0	0	0	0	0	0	26140.8	1	1	57.5363	44.5862
DATA	2304	28	9	0	0	A_42_P542809	NM_021671	10102	381.435	2.307726e+002	2.322409e+001	281	40	8.387176e+000	0	0	0	0	0	0	219.202	1	1	47.2035	41.963
DATA	2305	28	10	0	0	A_64_P065887	ENSRNOT00000024693	10127.5	381.614	1.226972e+002	1.254207e+001	177	40	8.053935e+000	0	0	0	0	0	0	116.897	1	1	47.5395	38.1389
DATA	2306	28	11	0	0	A_64_P043406	NM_001024902	10153	381.347	4.721004e+002	4.728116e+001	513	40	8.685056e+000	0	0	0	0	0	0	451.058	1	1	48.5334	40.2593
DATA	2307	28	12	0	0	A_64_P060769	NM_001191090	10178.4	381.258	6.560728e+002	6.565819e+001	698	45.5	8.899092e+000	0	0	0	0	0	0	628.53	1	1	46.1809	44.9231
DATA	2308	28	13	0	0	A_64_P150789	A_64_P150789	10203.4	381.329	1.088767e+001	2.799000e+000	72	42	8.101915e+000	0	0	0	0	0	0	10.4574	1	0	48.5334	42.2222
DATA	2309	28	14	0	0	A_64_P110254	NM_022404	10228.9	381.819	3.474671e+003	3.474766e+002	3384.5	42	9.445592e+000	0	0	0	0	0	0	3345.75	1	1	46.8651	42.8276
DATA	2310	28	15	0	0	A_42_P700753	FQ212883	10254.5	381.5	8.223252e+002	8.227255e+001	861	43	6.511528e+000	0	0	0	0	0	0	793.611	1	1	57.5363	43
DATA	2311	28	16	0	0	A_42_P503768	NM_001009466	10279.7	381.675	1.340093e+002	1.364341e+001	193.5	41	1.144547e+001	0	0	0	0	0	0	129.605	1	1	50.7771	44.9643
DATA	2312	28	17	0	0	A_64_P106021	ENSRNOT00000017892	10305.4	381.729	5.482733e+001	6.049150e+000	117	41	9.037688e+000	0	0	0	0	0	0	53.1304	1	1	47.5395	38.5862
DATA	2313	28	18	0	0	A_43_P10861	NM_001024879	10330.5	381.583	1.362547e+002	1.386228e+001	196	38.5	6.768566e+000	0	0	0	0	0	0	132.267	1	1	48.2044	38.4643
DATA	2314	28	19	0	0	A_44_P562251	BF545174	10356.1	381.5	4.502431e+001	5.173061e+000	107	35	8.295787e+000	0	0	0	0	0	0	43.7758	1	1	56.9804	37.4848
DATA	2315	28	20	0	0	A_42_P608768	ENSRNOT00000009898	10381.2	381.536	8.297165e+001	8.678354e+000	142.5	44.5	5.469492e+000	0	0	0	0	0	0	80.7816	1	1	47.2035	43.2857
DATA	2316	28	21	0	0	A_64_P117115	NM_001109329	10406.6	381.573	1.667435e+001	3.039048e+000	76.5	39	6.430694e+000	0	0	0	0	0	0	16.2536	1	1	57.5363	39.5313
DATA	2317	28	22	0	0	A_64_P043331	ENSRNOT00000032411	10432.4	381.684	1.149250e+002	1.176945e+001	178.5	39.5	8.921987e+000	0	0	0	0	0	0	112.138	1	1	49.5074	37.75
DATA	2318	28	23	0	0	A_42_P664274	NM_001079705	10457.4	381.87	5.005594e+002	5.012015e+001	544	37	7.670289e+000	0	0	0	0	0	0	488.801	1	1	46.8651	38.4
DATA	2319	28	24	0	0	A_64_P044593	NM_001173451	10483.1	381.614	2.139489e+002	2.154454e+001	272	40	7.488634e+000	0	0	0	0	0	0	209.035	1	1	57.259	39.7188
DATA	2320	28	25	0	0	A_64_P006978	NM_001109371	10508.5	381.648	2.538828e+001	3.587034e+000	87	41	8.393668e+000	0	0	0	0	0	0	24.8137	1	1	57.5363	39.0294
DATA	2321	28	26	0	0	A_64_P119390	NM_001109519	10533.6	381.537	1.808852e+001	3.113158e+000	81	34	7.403663e+000	0	0	0	0	0	0	17.681	1	1	46.1809	34.7826
DATA	2322	28	27	0	0	A_64_P034714	A_64_P034714	10559	381.613	1.147531e+001	2.781697e+000	72	39	9.307718e+000	0	0	0	0	0	0	11.2157	1	0	44.0646	37.8857
DATA	2323	28	28	0	0	A_44_P535959	NM_001107650	10584.1	381.789	1.425552e+002	1.447912e+001	202	41	9.058238e+000	0	0	0	0	0	0	139.288	1	1	47.2035	41.5952
DATA	2324	28	29	0	0	A_64_P286274	ENSRNOT00000055318	10609.9	381.985	1.124896e+002	1.153130e+001	172	40	7.041064e+000	0	0	0	0	0	0	109.853	1	1	46.8651	39.9189
DATA	2325	28	30	0	0	A_44_P333384	NM_001024788	10635.3	381.727	2.652824e+001	3.671463e+000	89	39.5	9.962363e+000	0	0	0	0	0	0	25.8855	1	1	45.1352	40.2857
DATA	2326	28	31	0	0	A_42_P522194	NM_012914	10660.4	382.1	7.485833e+001	7.905195e+000	137	42	1.290371e+001	0	0	0	0	0	0	72.9754	1	1	47.5395	43.4545
DATA	2327	28	32	0	0	A_44_P273859	NM_017021	10686.5	382	2.553255e+000	2.555816e+000	63.5	39.5	1.052223e+001	0	0	0	0	0	0	2.41186	0	0	54.1152	40.725
DATA	2328	28	33	0	0	A_43_P11665	NM_013024	10711.5	381.843	4.708240e+001	5.353228e+000	108	35	1.039677e+001	0	0	0	0	0	0	45.7738	1	1	47.5395	38.3125
DATA	2329	28	34	0	0	A_64_P118273	NM_001170593	10737	382	4.236591e+001	4.945688e+000	104	38	1.064736e+001	0	0	0	0	0	0	41.12	1	1	54.9904	40.5405
DATA	2330	28	35	0	0	A_42_P762814	NM_031318	10762	381.797	1.504686e+003	1.504903e+002	1502	42	7.437106e+000	0	0	0	0	0	0	1457.69	1	1	46.8651	42.8148
DATA	2331	28	36	0	0	A_44_P384017	NM_031688	10787.4	381.853	2.303536e+002	2.317738e+001	288	44	9.973924e+000	0	0	0	0	0	0	222.692	1	1	47.2035	43.3333
DATA	2332	28	37	0	0	A_64_P118872	A_64_P118872	10812.9	381.2	6.839919e+000	2.657525e+000	70	40	1.229398e+001	0	0	0	0	0	0	6.59662	1	0	36.9964	44.7273
DATA	2333	28	38	0	0	A_42_P599210	NM_001008326	10838.2	382.116	5.745272e+002	5.751036e+001	616.5	41	8.054379e+000	0	0	0	0	0	0	552.763	1	1	46.5243	42.3889
DATA	2334	28	39	0	0	A_44_P305801	NM_001033894	10863.7	382.104	1.584348e+003	1.584558e+002	1547	42	7.560940e+000	0	0	0	0	0	0	1520.19	1	1	49.1849	42.9333
DATA	2335	28	40	0	0	A_64_P085462	A_64_P085462	10889.5	382.352	2.251604e+004	2.251606e+003	21880.5	46	6.910941e+000	0	0	0	0	0	0	21540.9	1	1	57.5363	45.3056
DATA	2336	28	41	0	0	A_42_P488000	NM_001108479	10914.2	381.688	5.986097e+002	5.991727e+001	635	47	9.709122e+000	0	0	0	0	0	0	570.914	1	1	45.1352	46.7273
DATA	2337	28	42	0	0	A_42_P818546	NM_001191600	10939.8	381.677	3.077878e+002	3.088886e+001	357	41	1.048592e+001	0	0	0	0	0	0	292.578	1	1	45.4864	40.5
DATA	2338	28	43	0	0	A_44_P488489	TC610872	10965.4	382	6.523124e+002	6.528361e+001	678	37.5	1.043876e+001	0	0	0	0	0	0	617.95	1	1	48.5334	38.25
DATA	2339	28	44	0	0	A_64_P153971	A_64_P153971	10990.8	382.077	5.915282e+000	2.689700e+000	67	35.5	9.267283e+000	0	0	0	0	0	0	5.58343	1	0	49.5074	37.0556
DATA	2340	28	45	0	0	A_64_P077985	NM_001170478	11016.4	382.427	3.728350e+001	4.564777e+000	97	39	1.041386e+001	0	0	0	0	0	0	35.0597	1	1	57.5363	41.6786
DATA	2341	28	46	0	0	A_44_P576822	NM_080771	11041.6	382.427	4.127723e+002	4.136183e+001	459	40	1.017638e+001	0	0	0	0	0	0	386.645	1	1	57.5363	42.4
DATA	2342	28	47	0	0	A_64_P134310	A_64_P134310	11067.1	382.5	4.474882e+001	5.203127e+000	104	38.5	7.892775e+000	0	0	0	0	0	0	41.746	1	1	56.9804	39.3529
DATA	2343	28	48	0	0	A_64_P134706	NM_001107533	11092.5	382.5	1.638137e+001	3.129016e+000	76	36	8.041559e+000	0	0	0	0	0	0	15.2182	1	1	57.5363	39
DATA	2344	28	49	0	0	A_42_P469751	XM_001054007	11117.6	381.712	1.214304e+002	1.243475e+001	178.5	45.5	1.012797e+001	0	0	0	0	0	0	112.317	1	1	45.835	43.1
DATA	2345	28	50	0	0	A_64_P082653	ENSRNOT00000020906	11143.3	381.935	4.856529e+001	5.551496e+000	103.5	41	6.888343e+000	0	0	0	0	0	0	44.7223	1	1	45.1352	41.3333
DATA	2346	28	51	0	0	A_43_P18902	NM_001109221	11168.2	381.985	8.630946e+001	9.043806e+000	139.5	40	1.001305e+001	0	0	0	0	0	0	79.1306	1	1	45.835	40.2414
DATA	2347	28	52	0	0	A_64_P086719	ENSRNOT00000065918	11194.1	382.5	3.619058e+000	2.737818e+000	65	37	7.119116e+000	0	0	0	0	0	0	3.30281	1	0	56.9804	39.5
DATA	2348	28	53	0	0	A_64_P138585	TC587165	11219.1	382.311	1.557442e+003	1.557681e+002	1485.5	39	9.904056e+000	0	0	0	0	0	0	1414.84	1	1	48.8603	40.9032
DATA	2349	28	54	0	0	A_64_P230444	ENSRNOT00000010282	11244.7	382.413	2.040995e+003	2.041178e+002	1890.5	41.5	1.016616e+001	0	0	0	0	0	0	1845.38	1	1	48.8603	42.4375
DATA	2350	28	55	0	0	A_64_P124427	TC642834	11270.4	382.447	4.742090e+001	5.482917e+000	102	41	9.882354e+000	0	0	0	0	0	0	42.6721	1	1	49.8279	43.1667
DATA	2351	28	56	0	0	A_42_P778587	NM_001135767	11295.4	382.37	2.189436e+002	2.206829e+001	264.5	40	7.796193e+000	0	0	0	0	0	0	196.099	1	1	48.2044	40.3704
DATA	2352	28	57	0	0	A_42_P526030	NM_057197	11320.7	382.296	2.130394e+003	2.130575e+002	1939	34	7.543361e+000	0	0	0	1	0	0	1899.08	1	1	48.2044	36.1667
DATA	2353	28	58	0	0	A_64_P022561	XM_001070923	11346.5	382.5	5.494699e+001	6.163187e+000	112	39	7.762761e+000	0	0	0	0	0	0	48.7474	1	1	57.5363	37.9487
DATA	2354	28	59	0	0	A_64_P126226	NM_001105901	11371.8	382.412	9.361993e+001	9.773112e+000	144	41	6.571884e+000	0	0	0	0	0	0	82.6673	1	1	46.8651	39.2414
DATA	2355	28	60	0	0	A_64_P089541	NM_001106214	11397	382.074	1.546251e+002	1.571719e+001	190	45	8.950099e+000	0	0	0	0	0	0	135.9	1	1	46.8651	45.6765
DATA	2356	28	61	0	0	A_44_P205869	NM_138891	11422.4	382.267	3.929785e+002	3.939967e+001	389	40.5	8.496179e+000	0	0	0	0	0	0	343.818	1	1	49.1849	41.5667
DATA	2357	28	62	0	0	A_44_P491796	NM_012881	11448	382.545	9.882916e+001	1.028384e+001	146	39	8.537335e+000	0	0	0	0	0	0	86.0794	1	1	55.8519	38.2188
DATA	2358	28	63	0	0	A_64_P132706	NM_001008304	11473.4	382.573	2.908081e+004	2.908083e+003	24434.5	43	1.422449e+001	0	0	0	0	0	0	25218.3	1	1	57.5363	45.5185
DATA	2359	28	64	0	0	A_64_P040715	NM_001011979	11498.6	382.573	4.126445e+002	4.136401e+001	418	45	1.347957e+001	0	0	0	0	0	0	356.329	1	1	57.5363	44.0323
DATA	2360	28	65	0	0	A_44_P191055	NM_001107693	11523.7	382.52	1.378403e+003	1.378703e+002	1200	49	1.299996e+001	0	0	0	0	0	0	1185.44	1	1	49.1849	49.3667
DATA	2361	28	66	0	0	A_64_P077493	XR_005942	11549.5	382.703	1.015776e+001	3.064490e+000	70	41.5	9.875563e+000	0	0	0	0	0	0	8.70117	1	0	49.1849	41.4412
DATA	2362	28	67	0	0	A_44_P317600	NM_012612	11574.8	382.64	3.107276e+002	3.120799e+001	329	46	1.110214e+001	0	0	0	0	0	0	265.173	1	1	49.5074	44.8485
DATA	2363	28	68	0	0	A_42_P751368	NM_001047874	11600	382.603	1.426763e+003	1.427060e+002	1243	42	1.017510e+001	0	0	0	0	0	0	1213.32	1	1	48.5334	42.575
DATA	2364	28	69	0	0	A_42_P711568	NM_001107584	11625.4	382.5	4.167146e+003	4.167249e+002	3507	38.5	9.706790e+000	0	0	0	0	0	0	3532.03	1	1	47.8731	38.6875
DATA	2365	28	70	0	0	A_64_P091817	A_64_P091817	11651.2	382.74	3.969954e+002	3.980758e+001	395.5	36	6.413796e+000	0	0	0	0	0	0	335.466	1	1	48.5334	37.6333
DATA	2366	28	71	0	0	A_64_P006628	NM_172328	11676.7	382.47	4.659509e+001	5.509030e+000	101	40	8.667468e+000	0	0	0	0	0	0	39.2635	1	1	46.5243	40
DATA	2367	28	72	0	0	A_64_P057760	NM_001191643	11701.9	382.634	1.387556e+002	1.418488e+001	174.5	40	8.636616e+000	0	0	0	0	0	0	116.644	1	1	47.5395	37.6552
DATA	2368	28	73	0	0	A_44_P150013	NM_001134495	11727.4	382.804	2.963219e+000	2.952225e+000	55	40	9.349426e+000	0	0	0	0	0	0	-2.74289	0	0	42.2201	40
DATA	2369	28	74	0	0	A_44_P526975	NM_001002822	11752.5	382.984	1.328624e+002	1.361136e+001	172	37	8.838740e+000	0	0	0	0	0	0	111.273	1	1	43.7019	39.04
DATA	2370	28	75	66	-1	(-)3xSLv1	NegativeControl	11778.2	382.343	2.972534e+000	2.961505e+000	56.5	36	8.161165e+000	0	0	0	0	0	0	-3.70704	0	0	45.1352	37.7308
DATA	2371	28	76	0	0	A_42_P648937	NM_001191732	11803.1	382.896	4.983844e+002	4.992649e+001	478	38	7.108870e+000	0	0	0	0	0	0	416.459	1	1	46.8651	39.2703
DATA	2372	28	77	0	0	A_44_P533786	NM_053749	11828.8	382.91	3.981633e+001	4.964483e+000	94	38	4.762849e+000	0	0	0	0	0	0	33.2556	1	1	45.835	38.5517
DATA	2373	28	78	0	0	A_64_P156165	S68987	11854.1	382.896	3.447045e+003	3.447172e+002	2914	38	9.568236e+000	0	0	0	0	0	0	2879.09	1	1	46.8651	39.6364
DATA	2374	28	79	0	0	A_64_P084293	NM_001000525	11879.5	383.123	1.850644e+001	3.493915e+000	76	41.5	1.009518e+001	0	0	0	0	0	0	15.466	1	1	42.9674	42.5333
DATA	2375	28	80	0	0	A_42_P708569	NM_001191837	11904.9	383.012	3.647930e+003	3.648050e+002	3103	42	1.017313e+001	0	0	0	0	0	0	3051.76	1	1	49.5074	41.7241
DATA	2376	28	81	0	0	A_64_P112215	NM_001110141	11930	382.785	2.743703e+002	2.759579e+001	289	41	9.558752e+000	0	0	0	0	0	0	229.891	1	1	45.835	40.5714
DATA	2377	28	82	0	0	A_42_P567793	NM_001107668	11955.5	382.88	1.232956e+003	1.233309e+002	1052	38	8.222707e+000	0	0	0	0	0	0	1035.41	1	1	48.8603	37.7097
DATA	2378	28	83	0	0	A_42_P481087	XM_232226	11981.5	383	4.258397e+002	4.268537e+001	416	41.5	9.500393e+000	0	0	0	0	0	0	358.666	1	1	54.1152	41.5333
DATA	2379	28	84	66	1	DarkCorner	DarkCorner	12006.5	383.282	3.368425e+000	2.949412e+000	62	39	8.250034e+000	0	0	0	0	0	0	2.84713	1	0	50.4627	41.2162
DATA	2380	28	85	66	1	DarkCorner	DarkCorner	12032.9	383.872	2.927795e+000	2.916933e+000	59	37	8.583063e+000	0	0	0	0	0	0	-1.07383	0	0	49.1849	37.9848
DATA	2381	29	1	66	1	DarkCorner	DarkCorner	9886.42	388.573	2.688219e+000	2.678380e+000	61	36	7.637976e+000	0	0	0	0	0	0	0.248621	0	0	57.5363	35.9569
DATA	2382	29	2	66	1	DarkCorner	DarkCorner	9911.51	388.594	2.679288e+000	2.669347e+000	59	44	7.965922e+000	0	0	0	0	0	0	-2.42429	0	0	47.2035	42.5484
DATA	2383	29	3	0	0	A_64_P096512	NM_031782	9936.63	388.64	9.085441e+003	9.085480e+002	7914	42	7.174046e+000	0	0	0	0	0	0	8457.81	1	1	48.8603	40.8205
DATA	2384	29	4	0	0	A_44_P172814	NM_173102	9962.26	388.58	1.227015e+004	1.227018e+003	11469	42	9.297330e+000	0	0	0	0	0	0	11461.3	1	1	46.8651	42.0286
DATA	2385	29	5	0	0	A_42_P788040	NM_001025053	9987.89	388.5	4.752242e+001	5.437541e+000	107	38	8.128934e+000	0	0	0	0	0	0	44.5391	1	1	56.9804	39.7097
DATA	2386	29	6	0	0	A_42_P808945	NM_181368	10013.1	388.878	2.798570e+002	2.810936e+001	319	39	8.184659e+000	0	0	0	1	0	0	263.163	1	1	47.5395	39.6364
DATA	2387	29	7	0	0	A_64_P162713	A_64_P162713	10038.8	388.84	2.634909e+000	2.633485e+000	64	42	8.338617e+000	0	0	0	0	0	0	1.97706	0	0	48.2044	42.8056
DATA	2388	29	8	0	0	A_44_P501204	NM_017361	10064	388.545	1.152887e+002	1.182216e+001	174.5	40	8.895330e+000	0	0	0	0	0	0	109.107	1	1	65	41.7576
DATA	2389	29	9	0	0	A_42_P785926	NM_001108289	10089.5	388.648	5.733434e+002	5.739366e+001	618.5	42	9.672880e+000	0	0	0	0	0	0	544.297	1	1	57.5363	44.2692
DATA	2390	29	10	0	0	A_42_P616287	NM_001134555	10114.6	388.573	1.012882e+002	1.045748e+001	157	41	9.370024e+000	0	0	0	0	0	0	96.4413	1	1	57.5363	41.2121
DATA	2391	29	11	66	-1	(-)3xSLv1	NegativeControl	10140.4	388.573	2.603132e+000	2.597152e+000	64	40	9.136040e+000	0	0	0	0	0	0	1.31941	0	0	57.5363	38.9429
DATA	2392	29	12	0	0	A_43_P12365	NM_023101	10165.7	389.043	2.909664e+001	3.892870e+000	88	43.5	1.009224e+001	0	0	0	0	0	0	27.8644	1	1	46.1809	42.875
DATA	2393	29	13	0	0	A_64_P076643	ENSRNOT00000057620	10191.1	388.614	5.857325e+000	2.645145e+000	68	43	8.427809e+000	0	0	0	0	0	0	5.62383	1	0	65	43.8065
DATA	2394	29	14	0	0	A_64_P074865	XR_008898	10216.5	388.648	2.582594e+000	2.579802e+000	63.5	42.5	8.460928e+000	0	0	0	0	0	0	1.80034	0	0	57.5363	41.4286
DATA	2395	29	15	0	0	A_64_P009582	XM_214287	10241.7	389.095	1.582657e+004	1.582659e+003	15218	46	1.270445e+001	0	0	0	0	0	0	15270.3	1	1	48.8603	44.6957
DATA	2396	29	16	0	0	A_44_P527270	NM_020073	10267.3	389.185	4.846895e+001	5.481975e+000	109.5	41	8.262477e+000	0	0	0	0	0	0	46.8692	1	1	45.4864	42.75
DATA	2397	29	17	0	0	A_44_P530813	NM_012922	10292.6	388.768	1.615466e+002	1.635564e+001	221	41	9.189976e+000	0	0	0	0	0	0	156.523	1	1	46.8651	40.2069
DATA	2398	29	18	0	0	A_64_P078210	NM_001044303	10318	388.697	2.426620e+001	3.521118e+000	87	39.5	7.387599e+000	0	0	0	0	0	0	23.555	1	1	45.4864	39.9375
DATA	2399	29	19	0	0	A_42_P764985	NM_133402	10343.2	389	2.778107e+003	2.778224e+002	2721	38	7.594690e+000	0	0	0	0	0	0	2701.24	1	1	46.8651	37.9
DATA	2400	29	20	0	0	A_43_P23097	NM_001011965	10368.6	388.958	2.696004e+001	3.706368e+000	90	41	8.776101e+000	0	0	0	0	0	0	26.2528	1	1	48.2044	39.5926
DATA	2401	29	21	0	0	A_43_P19450	NM_001105713	10394.1	389.104	1.279680e+002	1.304646e+001	181	41	7.880980e+000	0	0	0	0	0	0	124.774	1	1	46.8651	41.2121
DATA	2402	29	22	0	0	A_42_P514419	NM_001009599	10419.3	389.014	5.177316e+002	5.183530e+001	571	39	7.457234e+000	0	0	0	0	0	0	505.345	1	1	47.2035	38.9
DATA	2403	29	23	0	0	A_64_P123974	A_64_P123974	10444.7	389.206	8.629701e+000	2.677945e+000	72	35	7.306452e+000	0	0	0	0	0	0	8.43077	1	0	46.5243	35.2069
DATA	2404	29	24	0	0	A_64_P221399	NM_134415	10470.2	389	9.493931e+002	9.497311e+001	981	36.5	8.240097e+000	0	0	0	0	0	0	928.104	1	1	46.8651	38.6875
DATA	2405	29	25	0	0	A_44_P760124	A_44_P760124	10495.6	388.853	2.602177e+002	2.614470e+001	321	37	6.333729e+000	0	0	0	0	0	0	254.492	1	1	47.2035	37.871
DATA	2406	29	26	0	0	A_42_P589551	NM_001037093	10521.1	389.104	9.957173e+002	9.960391e+001	1029	37	7.610123e+000	0	0	0	1	0	0	974.061	1	1	46.8651	35.7742
DATA	2407	29	27	0	0	A_42_P645467	NM_001108804	10546.2	388.507	1.663090e+001	3.029218e+000	79	36.5	8.328002e+000	0	0	0	0	0	0	16.2683	1	1	46.8651	36.0882
DATA	2408	29	28	0	0	A_64_P036006	A_64_P036006	10572.1	389.12	6.952704e+000	2.625953e+000	70	41	9.173094e+000	0	0	0	0	0	0	6.80008	1	0	47.8731	41.5135
DATA	2409	29	29	0	0	A_64_P088575	NM_001106355	10597.4	389.427	1.361380e+002	1.384749e+001	194	39	8.814401e+000	0	0	0	0	0	0	133.096	1	1	65	39.7949
DATA	2410	29	30	0	0	A_42_P798776	XM_002725203	10622.5	389.278	2.147477e+003	2.147627e+002	2160	41	1.040032e+001	0	0	0	0	0	0	2098.08	1	1	48.2044	40.8
DATA	2411	29	31	0	0	A_64_P017424	XM_001067041	10648.1	389.386	2.546643e+000	2.537194e+000	58	36.5	7.971037e+000	0	0	0	0	0	0	-4.15395	0	0	57.259	36.9118
DATA	2412	29	32	0	0	A_64_P147358	NM_001105764	10673.3	389.583	8.513084e+002	8.516872e+001	891	40	8.201045e+000	0	0	0	0	0	0	830.096	1	1	48.5334	39.6667
DATA	2413	29	33	0	0	A_42_P522285	NM_001044263	10698.8	389.43	2.719089e+002	2.730958e+001	326	37	8.208112e+000	0	0	0	0	0	0	264.775	1	1	58.0869	37.4571
DATA	2414	29	34	0	0	A_64_P130184	NM_017207	10724	389.265	1.328016e+003	1.328261e+002	1367.5	34	7.361345e+000	0	0	0	0	0	0	1291.16	1	1	46.1809	35.2424
DATA	2415	29	35	0	0	A_44_P167930	NM_012720	10749.5	389.176	1.795973e+003	1.796154e+002	1772	38	8.504128e+000	0	0	0	0	0	0	1743.02	1	1	48.8603	39.9655
DATA	2416	29	36	0	0	A_64_P135305	NM_001013426	10774.8	389.356	3.297507e+003	3.297606e+002	3130	41	7.801726e+000	0	0	0	0	0	0	3194.02	1	1	48.5334	41.8125
DATA	2417	29	37	0	0	A_64_P100182	NM_001077678	10800.4	389.235	1.128592e+001	2.800124e+000	72	40	9.402814e+000	0	0	0	0	0	0	10.9073	1	0	46.5243	42.7097
DATA	2418	29	38	0	0	A_44_P521699	NM_001007728	10825.6	389.411	1.531753e+002	1.553141e+001	205.5	37	5.671972e+000	0	0	0	0	0	0	147.688	1	1	48.5334	38.0333
DATA	2419	29	39	0	0	A_64_P053516	NM_001001280	10851.4	389.427	5.285240e+000	2.629172e+000	66	41	6.216912e+000	0	0	0	0	0	0	5.08239	1	0	57.5363	41.4167
DATA	2420	29	40	0	0	A_64_P073183	XM_001061392	10876.2	389.644	2.716211e+003	2.716333e+002	2599.5	46.5	8.032633e+000	0	0	0	0	0	0	2604.87	1	1	48.5334	44.8438
DATA	2421	29	41	0	0	A_64_P067447	NM_001109440	10902.1	389.5	5.305043e+002	5.311364e+001	570.5	47	7.274930e+000	0	0	0	0	0	0	507.2	1	1	56.9804	47.6842
DATA	2422	29	42	0	0	A_64_P089251	NM_001014109	10927.7	389.444	7.215020e+001	7.668783e+000	130	43.5	1.183065e+001	0	0	0	0	0	0	68.7592	1	1	48.5334	44.9167
DATA	2423	29	43	0	0	A_64_P118192	NM_022797	10952.7	388.971	6.835008e+002	6.839980e+001	715	37.5	1.239728e+001	0	0	0	0	0	0	649.186	1	1	46.1809	37.7188
DATA	2424	29	44	0	0	A_64_P082584	ENSRNOT00000024258	10978.2	389.493	1.766048e+002	1.785327e+001	231.5	37	9.459549e+000	0	0	0	0	0	0	167.156	1	1	46.5243	37.1765
DATA	2425	29	45	0	0	A_42_P465677	NM_001106241	11003.6	389.466	1.555201e+002	1.577221e+001	204	39	7.327559e+000	0	0	0	0	0	0	146.658	1	1	49.1849	37.7143
DATA	2426	29	46	0	0	A_42_P781999	NM_001106378	11028.8	389.739	1.104287e+004	1.104290e+003	10210	40	8.099139e+000	0	0	0	0	0	0	10374.3	1	1	46.5243	41.8966
DATA	2427	29	47	0	0	A_44_P991472	NM_134374	11054.2	389.644	7.651837e+002	7.656413e+001	750	39	8.150372e+000	0	0	0	0	0	0	715.986	1	1	48.5334	40.1667
DATA	2428	29	48	0	0	A_42_P767737	AY724480	11079.6	389.589	1.522193e+003	1.522425e+002	1455.5	40	7.084385e+000	0	0	0	0	0	0	1418.47	1	1	48.8603	40.1333
DATA	2429	29	49	0	0	A_42_P648200	NM_001037356	11105.2	389.364	7.469792e+001	7.932355e+000	128	36	9.499601e+000	0	0	0	0	0	0	69.3101	1	1	45.4864	38
DATA	2430	29	50	0	0	A_64_P006062	NM_001191695	11130.3	389.73	8.295495e+001	8.717832e+000	135	38	9.601728e+000	0	0	0	0	0	0	76.6448	1	1	44.7812	38.5455
DATA	2431	29	51	0	0	A_42_P728230	NM_001037782	11155.7	389.486	1.673126e+003	1.673342e+002	1579	41.5	1.015154e+001	0	0	0	0	0	0	1538.95	1	1	47.2035	41.4231
DATA	2432	29	52	0	0	A_64_P106011	A_64_P106011	11181.4	389.746	8.918993e+000	2.848101e+000	70	38	8.595744e+000	0	0	0	0	0	0	8.16654	1	0	42.9674	38.1471
DATA	2433	29	53	0	0	A_42_P622661	NM_001024292	11206.6	389.573	9.273087e+002	9.277067e+001	857	38	8.148714e+000	0	0	0	0	0	0	845.201	1	1	57.5363	39.8077
DATA	2434	29	54	0	0	A_42_P619844	NM_001030037	11231.7	389.863	3.136792e+003	3.136911e+002	2808	36	9.110745e+000	0	0	0	0	0	0	2846.03	1	1	48.2044	39.4545
DATA	2436	29	56	0	0	A_64_P128260	XM_001056985	11282.6	389.849	4.574126e+002	4.582419e+001	480	40	9.398407e+000	0	0	0	0	0	0	411.116	1	1	48.5334	40.5172
DATA	2437	29	57	0	0	A_44_P1034950	NM_053294	11308.4	389.573	1.844866e+002	1.865529e+001	231	39	7.149357e+000	0	0	0	0	0	0	165.011	1	1	57.5363	37.4483
DATA	2438	29	58	0	0	A_64_P080316	NM_139113	11333.6	389.573	2.140213e+002	2.158218e+001	251.5	36.5	7.910762e+000	0	0	0	0	0	0	190.534	1	1	57.5363	36.3611
DATA	2439	29	59	0	0	A_64_P053069	NM_001106820	11359	389.925	3.469939e+002	3.481177e+001	379	38.5	8.437567e+000	0	0	0	0	0	0	307.477	1	1	46.8651	39.0313
DATA	2440	29	60	0	0	A_42_P498066	NM_031136	11384.5	389.648	4.179108e+004	4.179109e+003	35669	42	9.518584e+000	0	0	0	0	0	0	36857.4	1	1	57.5363	43.5
DATA	2441	29	61	0	0	A_44_P277068	ENSRNOT00000058491	11409.8	389.866	3.177287e+003	3.177412e+002	2852.5	42	9.416345e+000	0	0	0	0	0	0	2789.47	1	1	46.1809	42.6176
DATA	2442	29	62	0	0	A_44_P685613	XM_225679	11435	389.797	7.207175e+002	7.212744e+001	687	36	8.089111e+000	0	0	0	0	0	0	629.9	1	1	46.8651	38.6061
DATA	2443	29	63	0	0	A_64_P124364	ENSRNOT00000015807	11460.7	389.774	1.074573e+002	1.111634e+001	152	36.5	1.182044e+001	0	0	0	0	0	0	93.4964	1	1	44.7812	39.375
DATA	2444	29	64	0	0	A_42_P466362	NM_017142	11485.7	390.045	3.765208e+002	3.776042e+001	389	43	1.372387e+001	0	0	0	1	0	0	326.229	1	1	45.4864	44.963
DATA	2445	29	65	0	0	A_64_P081517	ENSRNOT00000037639	11511.3	389.97	8.923885e+001	9.374210e+000	139	42	1.145879e+001	0	0	0	0	0	0	76.9932	1	1	45.835	42.8056
DATA	2446	29	66	0	0	A_42_P629394	NM_031683	11536.4	389.843	1.196663e+003	1.197010e+002	1095	43	1.120376e+001	0	0	0	0	0	0	1028.33	1	1	47.5395	42.2963
DATA	2447	29	67	0	0	A_44_P500975	NM_001000833	11561.9	390.516	3.830521e+001	4.800152e+000	93	42	9.128120e+000	0	0	0	0	0	0	32.7942	1	1	43.7019	40.5484
DATA	2448	29	68	0	0	A_64_P165046	ENSRNOT00000015927	11587.2	389.831	4.162662e+001	5.075353e+000	95	43	9.541401e+000	0	0	0	0	0	0	35.5046	1	1	45.835	43.8529
DATA	2449	29	69	0	0	A_44_P222865	XM_235305	11612.9	389.8	2.919083e+003	2.919229e+002	2559	38	9.302295e+000	0	0	0	0	0	0	2481.19	1	1	46.8651	38.075
DATA	2451	29	71	0	0	A_64_P131688	XM_574187	11663.7	389.975	2.942215e+000	2.943349e+000	63	38	7.894307e+000	0	0	0	0	0	0	2.2479	0	0	49.1849	40.4848
DATA	2452	29	72	0	0	A_42_P556457	NM_001033931	11688.9	390.104	1.025990e+003	1.026411e+002	934	41	9.527174e+000	0	0	0	1	0	0	864.662	1	1	46.8651	40.2727
DATA	2453	29	73	0	0	A_42_P734384	NM_001108406	11714.2	389.667	1.620209e+003	1.620476e+002	1414	40	1.209464e+001	0	0	0	1	0	0	1362.27	1	1	45.4864	41.303
DATA	2454	29	74	0	0	A_42_P728032	XM_001066058	11739.6	390.014	6.339326e+002	6.346191e+001	591.5	38.5	1.064452e+001	0	0	0	0	0	0	532.029	1	1	48.2044	41.0667
DATA	2455	29	75	0	0	A_64_P151525	A_64_P151525	11765.6	389.794	3.929352e+001	4.916935e+000	93	38.5	9.653776e+000	0	0	0	0	0	0	32.9244	1	1	46.8651	40.6538
DATA	2456	29	76	0	0	A_43_P19276	ENSRNOT00000039523	11790.4	390.068	2.992309e+002	3.006902e+001	312	37.5	9.610982e+000	0	0	0	0	0	0	250.467	1	1	48.5334	38.875
DATA	2457	29	77	0	0	A_44_P529811	NM_001107657	11816.2	390.306	1.463148e+001	3.302561e+000	73	39	7.985336e+000	0	0	0	0	0	0	12.2391	1	0	44.4243	39.1471
DATA	2458	29	78	0	0	A_64_P104640	A_64_P104640	11841.4	390.151	1.008181e+004	1.008185e+003	8675	38	5.351039e+000	0	0	0	0	0	0	8431.26	1	1	48.5334	37.6857
DATA	2459	29	79	0	0	A_64_P003234	NM_001109048	11867	390.455	2.830729e+001	4.096055e+000	84	39	1.227487e+001	0	0	0	0	0	0	23.6808	1	1	55.8519	43.6207
DATA	2460	29	80	0	0	A_64_P097158	NM_001000875	11892.4	390.427	2.969182e+000	2.958166e+000	62.5	38	1.012520e+001	0	0	0	0	0	0	-0.507125	0	0	57.5363	40.3448
DATA	2461	29	81	0	0	A_64_P141814	NM_001134629	11917.6	390.125	1.218957e+002	1.254248e+001	164.5	41	7.939983e+000	0	0	0	0	0	0	102.185	1	1	44.7812	40.28
DATA	2462	29	82	0	0	A_42_P463602	NM_001107592	11943.3	390.5	2.959369e+000	2.961408e+000	64	40	7.937366e+000	0	0	0	0	0	0	2.32992	0	0	57.5363	39.7059
DATA	2463	29	83	0	0	A_64_P083366	NM_001077643	11968.4	390	7.008565e+003	7.008627e+002	5977	39.5	9.333807e+000	0	0	0	0	0	0	5901.47	1	1	48.5334	40.0938
DATA	2464	29	84	0	0	A_44_P121039	NM_172008	11993.8	390.296	3.322863e+002	3.335772e+001	341	43	7.869846e+000	0	0	0	0	0	0	280.707	1	1	47.2035	42.6296
DATA	2465	29	85	66	1	DarkCorner	DarkCorner	12019.3	390.342	2.931190e+000	2.920315e+000	59	39.5	7.250397e+000	0	0	0	0	0	0	-1.12091	0	0	50.4627	40.9808
DATA	2466	30	1	66	1	DarkCorner	DarkCorner	9899.45	395.532	2.680691e+000	2.670745e+000	58	38	1.029390e+001	0	0	0	0	0	0	-5.32073	0	0	43.7019	39.9167
DATA	2467	30	2	0	0	A_42_P687443	NM_020100	9924.03	395.828	8.083067e+001	8.510124e+000	136	43	6.079364e+000	0	0	0	0	0	0	75.2027	1	1	45.4864	41.5938
DATA	2468	30	3	0	0	A_42_P563382	ENSRNOT00000055321	9949.77	395.913	9.415616e+002	9.419353e+001	952	43	7.113304e+000	0	0	0	0	0	0	878.987	1	1	46.5243	42.8919
DATA	2469	30	4	0	0	A_42_P667100	NM_001013932	9974.91	395.896	6.532196e+002	6.537546e+001	671	41	9.499648e+000	0	0	0	0	0	0	611.819	1	1	46.8651	42.3824
DATA	2470	30	5	0	0	A_42_P553319	TC597248	10000.3	396.1	5.403569e+001	6.012005e+000	114	39	7.552605e+000	0	0	0	0	0	0	50.7796	1	1	47.2035	40.1026
DATA	2471	30	6	0	0	A_64_P151358	NM_181695	10026	396	2.078737e+001	3.349839e+000	79.5	43	8.288075e+000	0	0	0	0	0	0	19.5989	1	1	54.9904	42.4054
DATA	2472	30	7	0	0	A_44_P196743	ENSRNOT00000007795	10051.6	396.258	2.628061e+000	2.618311e+000	57	40	7.638246e+000	0	0	0	0	0	0	-5.96414	0	0	43.7019	39.9697
DATA	2474	30	9	0	0	A_64_P127111	NM_001106004	10101.8	395.727	5.829369e+003	5.829427e+002	5505.5	39.5	6.848299e+000	0	0	0	0	0	0	5547.19	1	1	45.4864	41.0625
DATA	2475	30	10	0	0	A_42_P470775	NM_001025126	10127.2	395.923	8.146240e+002	8.150372e+001	819.5	40	8.877486e+000	0	0	0	0	0	0	777.491	1	1	45.835	40.122
DATA	2476	30	11	0	0	A_44_P472855	NM_001000961	10152.7	395.836	1.094666e+002	1.124834e+001	172	40	8.565342e+000	0	0	0	0	0	0	104.772	1	1	45.835	40.5714
DATA	2477	30	12	0	0	A_64_P080682	NM_001109652	10178.4	396.262	8.941490e+000	2.730967e+000	71	43	8.822385e+000	0	0	0	0	0	0	8.58184	1	0	45.1352	42.6
DATA	2478	30	13	0	0	A_42_P727368	NM_001025693	10203.6	396.597	4.893517e+001	5.529092e+000	109	41.5	8.435136e+000	0	0	0	0	0	0	47.0884	1	1	49.8279	41
DATA	2479	30	14	0	0	A_64_P034427	A_64_P034427	10229.1	396.407	1.458027e+003	1.458253e+002	1476	43	9.169151e+000	0	0	0	0	0	0	1406.38	1	1	56.9804	41.64
DATA	2480	30	15	0	0	A_64_P042871	A_64_P042871	10254.5	396.352	2.903103e+002	2.914385e+001	347	41	8.866164e+000	0	0	0	0	0	0	280.659	1	1	57.5363	41.8125
DATA	2481	30	16	0	0	A_64_P152617	NM_001105747	10279.9	396.5	5.465340e+000	2.614163e+000	65	42	9.060505e+000	0	0	0	0	0	0	5.29486	1	0	56.9804	43.3125
DATA	2482	30	17	0	0	A_44_P468879	NM_001007798	10305	395.75	1.647736e+001	3.037492e+000	77	42	9.154164e+000	0	0	0	0	0	0	15.9926	1	1	45.4864	41.3421
DATA	2483	30	18	0	0	A_44_P252976	NM_001012071	10330.4	396.014	4.584677e+001	5.244753e+000	108	41	8.070904e+000	0	0	0	0	0	0	44.5772	1	1	47.8731	40.9143
DATA	2484	30	19	0	0	A_64_P014080	NM_022189	10356.1	396.5	9.974513e+000	2.731630e+000	71	38.5	7.351692e+000	0	0	0	0	0	0	9.71423	1	0	56.9804	38.2188
DATA	2485	30	20	0	0	A_44_P204789	NM_001025684	10381.3	396.186	3.227300e+002	3.237277e+001	381.5	41	7.431379e+000	0	0	0	0	0	0	314.727	1	1	47.2035	41.5556
DATA	2486	30	21	0	0	A_64_P030373	NM_001127319	10406.7	396.5	1.841499e+001	3.134526e+000	81	39	7.077452e+000	0	0	0	0	0	0	17.9801	1	1	57.5363	38.9032
DATA	2487	30	22	0	0	A_42_P558703	NM_001106810	10432	396.347	2.594056e+002	2.606404e+001	314	38	8.935732e+000	0	0	0	0	0	0	253.521	1	1	48.5334	38.2258
DATA	2488	30	23	0	0	A_44_P241190	NM_001013199	10457.6	396.534	3.458470e+002	3.467727e+001	397	36	6.833661e+000	0	0	0	0	0	0	338.269	1	1	49.1849	35.9677
DATA	2489	30	24	0	0	A_42_P539095	XM_001081794	10483.1	396.5	4.358402e+002	4.365743e+001	484	38.5	8.556678e+000	0	0	0	0	0	0	426.526	1	1	56.9804	40.4063
DATA	2490	30	25	0	0	A_64_P010905	ENSRNOT00000057216	10508.5	396.5	3.280260e+001	4.142515e+000	92	37	6.104186e+000	0	0	0	0	0	0	32.1123	1	1	57.5363	36.7586
DATA	2491	30	26	0	0	A_44_P500660	NM_001007645	10533.4	396.076	2.046905e+002	2.062477e+001	255	35	7.732635e+000	0	0	0	0	0	0	200.397	1	1	45.1352	34.3571
DATA	2492	30	27	0	0	A_64_P056436	A_64_P056436	10559.2	396.231	1.938055e+002	1.954498e+001	249	39	1.039129e+001	0	0	0	0	0	0	189.725	1	1	45.835	40.4865
DATA	2493	30	28	0	0	A_42_P773816	NM_017079	10584.5	396.5	5.539165e+001	6.089877e+000	118	40	9.209855e+000	0	0	0	0	0	0	54.2094	1	1	57.5363	40.5833
DATA	2494	30	29	0	0	A_64_P138604	NM_001009967	10610	396.545	2.775226e+004	2.775228e+003	26773	40	6.477587e+000	0	0	0	0	0	0	27145.2	1	1	55.8519	38.6774
DATA	2495	30	30	0	0	A_42_P705302	NM_001107361	10635.1	396.616	3.574639e+003	3.574729e+002	3520.5	39	9.723814e+000	0	0	0	0	0	0	3493.81	1	1	48.5334	39.9459
DATA	2496	30	31	0	0	A_64_P027259	NM_001191656	10660.8	396.573	1.725028e+004	1.725030e+003	17206	39	7.911749e+000	0	0	0	0	0	0	16843.2	1	1	52.6241	39.2813
DATA	2497	30	32	0	0	A_44_P288333	ENSRNOT00000006659	10686	397.078	1.475014e+002	1.496714e+001	211.5	38	8.117752e+000	0	0	0	0	0	0	143.855	1	1	46.1809	38.1351
DATA	2498	30	33	0	0	A_42_P618217	NM_130752	10711.6	396.468	6.310635e+001	6.803851e+000	123	34	9.655788e+000	0	0	0	0	0	0	61.4531	1	1	43.7019	37.3514
DATA	2499	30	34	0	0	A_64_P151587	A_64_P151587	10737	396.545	3.633235e+000	2.573259e+000	67	37.5	8.097396e+000	0	0	0	0	0	0	3.53222	1	0	55.8519	39.1333
DATA	2500	30	35	0	0	A_42_P771107	NM_001108217	10762.3	396.4	2.694006e+002	2.706069e+001	327	38	5.952009e+000	0	0	0	0	0	0	261.418	1	1	46.8651	38.8438
DATA	2501	30	36	0	0	A_42_P689013	NM_053800	10787.5	396.634	7.171392e+003	7.171438e+002	6957	42.5	8.296426e+000	0	0	0	0	0	0	6944.68	1	1	47.8731	42.6429
DATA	2502	30	37	0	0	A_64_P155334	NM_001100945	10812.7	396.778	1.720626e+003	1.720817e+002	1716.5	39	8.618602e+000	0	0	0	0	0	0	1662.47	1	1	47.5395	41.0303
DATA	2503	30	38	0	0	A_64_P049007	A_64_P049007	10838.1	397	3.158233e+001	4.071536e+000	93	39.5	5.420347e+000	0	0	0	0	0	0	30.4396	1	1	46.1809	39.8611
DATA	2504	30	39	0	0	A_44_P351461	ENSRNOT00000027179	10863.9	396.614	2.746030e+001	3.765708e+000	89	43	8.874500e+000	0	0	0	0	0	0	26.3931	1	1	65	43.5135
DATA	2505	30	40	0	0	A_44_P604267	NM_022933	10889.1	396.985	2.530230e+002	2.543391e+001	311.5	46	6.754167e+000	0	0	0	0	0	0	242.504	1	1	46.8651	46.0526
DATA	2506	30	41	0	0	A_64_P070475	XM_001061514	10915.3	396.687	2.602059e+000	2.598485e+000	63.5	45	9.350504e+000	0	0	0	0	0	0	1.69718	0	0	46.1809	44.5429
DATA	2507	30	42	0	0	A_64_P119963	A_64_P119963	10939.9	396.757	8.314304e+002	8.318370e+001	856.5	43	1.217090e+001	0	0	0	0	0	0	791.809	1	1	46.5243	42.3684
DATA	2508	30	43	0	0	A_42_P658562	NM_001134416	10965.3	396.844	2.235932e+002	2.251108e+001	273.5	38.5	1.010057e+001	0	0	0	0	0	0	212.21	1	1	45.4864	38.4167
DATA	2509	30	44	0	0	A_64_P116830	A_64_P116830	10990.9	396.935	1.003360e+002	1.036977e+001	158	39	8.799686e+000	0	0	0	0	0	0	94.8839	1	1	54.4085	39.2813
DATA	2510	30	45	0	0	A_64_P048531	ENSRNOT00000019473	11016.3	396.757	7.587048e+001	8.029592e+000	132	39	6.195925e+000	0	0	0	0	0	0	71.4769	1	1	47.5395	37.7083
DATA	2511	30	46	0	0	A_64_P122716	NM_139331	11041.5	397	2.874151e+000	2.654589e+000	63.5	40	1.027865e+001	0	0	0	0	0	0	2.69735	1	0	54.1152	40.9333
DATA	2512	30	47	0	0	A_64_P077323	NM_201992	11067	397	1.133100e+001	2.881812e+000	73	39	6.716534e+000	0	0	0	0	0	0	10.591	1	0	54.9904	39.6129
DATA	2513	30	48	0	0	A_42_P569711	NM_001108977	11092.2	397	1.052631e+002	1.085737e+001	158	40	7.277768e+000	0	0	0	0	0	0	97.9821	1	1	46.8651	40.1818
DATA	2514	30	49	0	0	A_42_P474100	NM_001191820	11117.8	396.912	2.387287e+003	2.387436e+002	2345	39	9.805881e+000	0	0	0	0	0	0	2212.57	1	1	46.5243	40.9697
DATA	2515	30	50	0	0	A_64_P026404	A_64_P026404	11143.5	397	2.694037e+000	2.684187e+000	60.5	39.5	9.044496e+000	0	0	0	0	0	0	0.258042	0	0	54.1152	40.6071
DATA	2516	30	51	0	0	A_64_P026581	ENSRNOT00000029099	11168.4	396.894	2.347313e+003	2.347467e+002	2243	43	1.056662e+001	0	0	0	0	0	0	2156.42	1	1	45.4864	41.1818
DATA	2517	30	52	0	0	A_64_P043624	NM_133565	11194.1	396.923	1.333884e+003	1.334159e+002	1282	38	7.342523e+000	0	0	0	0	0	0	1219.78	1	1	49.1849	38.5333
DATA	2518	30	53	0	0	A_44_P417429	NM_001011983	11219.2	397	1.041544e+003	1.041900e+002	1019	37	8.378168e+000	0	0	0	0	0	0	948.128	1	1	46.8651	39.973
DATA	2519	30	54	0	0	A_64_P007574	ENSRNOT00000028681	11244.6	397.028	1.401868e+004	1.401871e+003	12434	36	1.002718e+001	0	0	0	0	0	0	12702.2	1	1	48.2044	40.4828
DATA	2520	30	55	0	0	A_42_P529690	NM_001173510	11269.9	397.352	9.580315e+003	9.580355e+002	8633	40	1.130369e+001	0	0	0	0	0	0	8640.5	1	1	47.8731	41.76
DATA	2521	30	56	0	0	A_42_P505070	TC624062	11295.2	396.868	1.503606e+003	1.503859e+002	1366	40	6.464460e+000	0	0	0	1	0	0	1349.65	1	1	46.1809	37.4516
DATA	2522	30	57	0	0	A_42_P504653	NM_017143	11321	397.455	1.922551e+001	3.373598e+000	76.5	41.5	1.122098e+001	0	0	0	0	0	0	17.176	1	1	65	41.3438
DATA	2523	30	58	0	0	A_64_P017891	A_64_P017891	11346.9	397.52	2.795826e+000	2.785536e+000	63	39	7.653109e+000	0	0	0	0	0	0	0.190751	0	0	49.8279	37.5152
DATA	2524	30	59	0	0	A_42_P642724	NM_001107585	11371.4	396.972	1.760181e+003	1.760403e+002	1580	38	7.064788e+000	0	0	0	0	0	0	1557.85	1	1	48.2044	38.4583
DATA	2525	30	60	0	0	A_42_P780943	NM_001011906	11396.7	397	3.580545e+002	3.591564e+001	385	42	6.524874e+000	0	0	0	0	0	0	315.443	1	1	45.4864	42.1765
DATA	2526	30	61	0	0	A_44_P482325	NM_145669	11422.5	397.254	5.796246e+002	5.803122e+001	556	39	8.394729e+000	0	0	0	0	0	0	508.31	1	1	47.5395	38.7941
DATA	2527	30	62	0	0	A_42_P716750	NM_001024757	11447.6	397.26	1.772280e+002	1.794838e+001	216	35	9.134568e+000	0	0	0	0	0	0	154.736	1	1	48.5334	36.8286
DATA	2528	30	63	0	0	A_64_P009565	NM_001191823	11473.3	397.155	7.728277e+001	8.236771e+000	128	38	9.364569e+000	0	0	0	0	0	0	67.1768	1	1	47.5395	38.8148
DATA	2529	30	64	0	0	A_42_P495969	NM_012824	11498.4	397.406	4.385448e+003	4.385541e+002	3838.5	41	8.309872e+000	0	0	0	1	0	0	3796.21	1	1	47.5395	39.5556
DATA	2530	30	65	0	0	A_64_P154671	ENSRNOT00000024704	11524.1	397.169	1.021326e+002	1.060967e+001	148	44	1.121247e+001	0	0	0	0	0	0	88.041	1	1	46.8651	43.0667
DATA	2531	30	66	0	0	A_44_P111337	NM_001108724	11549.1	397.338	1.158889e+003	1.159247e+002	1039	43	1.046454e+001	0	0	0	0	0	0	995.183	1	1	45.835	42.1071
DATA	2532	30	67	0	0	A_42_P665627	NM_023095	11574.9	397.016	6.673157e+001	7.274122e+000	117	41.5	9.749638e+000	0	0	0	0	0	0	57.0856	1	1	45.1352	41.0938
DATA	2533	30	68	0	0	A_44_P447585	NM_001166676	11599.8	397.458	9.172449e+000	3.046298e+000	67	40.5	9.394181e+000	0	0	0	0	0	0	7.82015	1	0	39.4933	39.825
DATA	2534	30	69	0	0	A_42_P463754	NM_030994	11625.4	397.406	1.741200e+002	1.765424e+001	203.5	38	9.235276e+000	0	0	0	0	0	0	147.959	1	1	47.5395	37.9032
DATA	2535	30	70	0	0	A_42_P644717	NM_001108927	11651.1	397.5	5.813823e+000	2.980658e+000	65.5	36	7.927379e+000	0	0	0	0	0	0	4.92535	1	0	65	38.52
DATA	2536	30	71	0	0	A_42_P546539	NM_001135801	11676.5	397.5	2.988401e+002	3.002743e+001	311	38.5	8.482392e+000	0	0	0	1	0	0	252.483	1	1	57.5363	40.4412
DATA	2537	30	72	0	0	A_42_P818297	XM_001073988	11701.7	397.453	7.663249e+002	7.668881e+001	701	39.5	1.154217e+001	0	0	0	0	0	0	645.9	1	1	49.1849	39.9375
DATA	2538	30	73	0	0	A_64_P047416	NM_001109501	11727.2	397.691	1.378110e+002	1.409213e+001	175.5	35.5	1.253061e+001	0	0	0	0	0	0	115.918	1	1	46.1809	38.875
DATA	2539	30	74	0	0	A_43_P18389	XM_002726292	11752.7	397.113	1.596421e+001	3.354060e+000	74	37.5	6.220437e+000	0	0	0	0	0	0	13.4037	1	1	47.5395	38.4583
DATA	2540	30	75	0	0	A_64_P044276	NM_001105946	11778	397.343	1.626417e+003	1.626685e+002	1401	37	8.073980e+000	0	0	0	0	0	0	1363.82	1	1	45.4864	37.3214
DATA	2541	30	76	0	0	A_64_P059475	ENSRNOT00000029976	11803.5	397.5	2.967086e+000	2.956078e+000	59	42	8.822664e+000	0	0	0	0	0	0	-1.21429	0	0	65	41.9487
DATA	2542	30	77	0	0	A_64_P005496	A_64_P005496	11828.7	397.5	2.968401e+000	2.958375e+000	62	38	5.488012e+000	0	0	0	0	0	0	0.639781	0	0	57.5363	37.5806
DATA	2544	30	79	0	0	A_42_P739860	NM_133578	11879.4	397.753	1.047148e+003	1.047565e+002	890	42	1.325752e+001	0	0	0	0	0	0	877.461	1	1	48.5334	43.5238
DATA	2545	30	80	0	0	A_42_P681251	NM_030844	11904.9	397.582	1.361922e+003	1.362242e+002	1225	39.5	1.028108e+001	0	0	0	0	0	0	1142.42	1	1	46.1809	40.2353
DATA	2546	30	81	0	0	A_42_P567793	NM_001107668	11930.4	397.573	1.001982e+003	1.002415e+002	893	39.5	8.135276e+000	0	0	0	0	0	0	841.876	1	1	57.5363	39.6176
DATA	2547	30	82	0	0	A_64_P041662	NM_182843	11955.6	397.594	2.780454e+002	2.795966e+001	290	40	9.153643e+000	0	0	0	0	0	0	234.137	1	1	47.5395	41.5926
DATA	2548	30	83	0	0	A_42_P534679	NM_001134974	11981.1	397.507	1.360627e+003	1.360943e+002	1227	39	9.885303e+000	0	0	0	0	0	0	1149.04	1	1	47.8731	39.8276
DATA	2549	30	84	66	1	DarkCorner	DarkCorner	12006.6	397.573	2.933161e+000	2.922279e+000	61.5	43	8.423275e+000	0	0	0	0	0	0	-0.587532	0	0	57.5363	42.5185
DATA	2550	30	85	66	1	DarkCorner	DarkCorner	12032.4	397.548	4.056751e+000	2.937889e+000	63	38	8.089735e+000	0	0	0	0	0	0	3.45293	1	0	53.5237	38.3403
DATA	2551	31	1	66	1	DarkCorner	DarkCorner	9886.42	403.427	2.681961e+000	2.672010e+000	59	35	8.106482e+000	0	0	0	0	0	0	-2.94095	0	0	65	35.6578
DATA	2552	31	2	0	0	A_42_P576549	NM_001106490	9912.06	402.912	9.634009e+000	2.832211e+000	70	41	7.426803e+000	0	0	0	0	0	0	8.95877	1	0	46.8651	40.25
DATA	2553	31	3	0	0	A_42_P542638	NM_001012202	9936.97	403.342	2.198408e+002	2.214376e+001	265	42	6.172177e+000	0	0	0	0	0	0	205.112	1	1	48.8603	41.0313
DATA	2554	31	4	0	0	A_42_P765736	NM_001025670	9962.64	403.375	2.462742e+001	3.614473e+000	86	43	7.653197e+000	0	0	0	1	0	0	23.0545	1	1	50.7771	44
DATA	2555	31	5	0	0	A_44_P372461	NM_001170708	9987.67	403.5	4.492575e+002	4.500308e+001	484	39	5.766235e+000	0	0	0	0	0	0	421.937	1	1	57.5363	38.871
DATA	2556	31	6	0	0	A_64_P070554	XM_001059856	10013.5	403.431	3.527451e+001	4.398982e+000	94.5	42.5	6.488692e+000	0	0	0	0	0	0	33.2388	1	1	48.5334	41.7105
DATA	2557	31	7	0	0	A_64_P030859	ENSRNOT00000045252	10038.4	403.521	5.981444e+003	5.981501e+002	5710	41	8.287963e+000	0	0	0	0	0	0	5654.06	1	1	48.2044	40.9032
DATA	2558	31	8	0	0	A_64_P079260	NM_001005546	10064	403.419	7.729006e+001	8.158382e+000	134	39.5	7.963057e+000	0	0	0	0	0	0	73.2897	1	1	49.1849	40.4063
DATA	2559	31	9	0	0	A_64_P149846	A_64_P149846	10089.3	403.373	4.682211e+003	4.682284e+002	4565	36	5.538814e+000	0	0	0	0	0	0	4453.36	1	1	46.1809	36.0385
DATA	2560	31	10	0	0	A_64_P120624	NM_031634	10114.7	403.5	1.458960e+001	2.978028e+000	73	41.5	8.680065e+000	0	0	0	0	0	0	13.918	1	1	57.5363	40.8158
DATA	2561	31	11	0	0	A_64_P158020	NM_001008909	10140.7	403.542	3.561002e+001	4.402433e+000	95	40	9.839719e+000	0	0	0	0	0	0	34.0704	1	1	48.2044	40.5152
DATA	2562	31	12	0	0	A_64_P116606	NM_153724	10165.3	403.446	4.393607e+001	5.095979e+000	103.5	45	9.693743e+000	0	0	0	0	0	0	42.1481	1	1	45.1352	43.7407
DATA	2563	31	13	0	0	A_44_P532436	ENSRNOT00000006946	10190.9	403.838	9.880156e+000	2.757858e+000	74.5	43	7.731405e+000	0	0	0	0	0	0	9.50352	1	0	46.5243	42.4103
DATA	2564	31	14	0	0	A_64_P027545	NM_023095	10216.5	403.731	1.102081e+002	1.131614e+001	172	42	8.531887e+000	0	0	0	0	0	0	106.271	1	1	50.4627	41.6897
DATA	2565	31	15	0	0	A_64_P076705	NM_017088	10241.7	403.5	7.320690e+004	7.320690e+003	69278	40	8.114564e+000	0	0	0	0	0	0	70752.8	1	1	57.5363	41
DATA	2566	31	16	0	0	A_44_P238642	NM_001127201	10266.9	404.031	1.917330e+003	1.917501e+002	1965	39	9.824260e+000	0	0	0	0	0	0	1857.18	1	1	46.8651	40.3667
DATA	2567	31	17	0	0	A_64_P037249	NM_001105802	10292.7	403.382	4.202894e+001	4.916936e+000	104	41.5	8.378118e+000	0	0	0	0	0	0	40.7904	1	1	46.5243	42.0833
DATA	2568	31	18	0	0	A_64_P061524	NM_172064	10318.2	403.667	2.670950e+002	2.683067e+001	315	38	9.305388e+000	0	0	0	0	0	0	259.71	1	1	49.5074	39.0976
DATA	2569	31	19	0	0	A_42_P536564	NM_001008344	10343.4	403.573	1.379235e+003	1.379469e+002	1375	39	7.927345e+000	0	0	0	0	0	0	1343.29	1	1	57.5363	38.697
DATA	2570	31	20	0	0	A_64_P062433	NM_001135804	10368.6	403.754	2.329942e+002	2.343738e+001	290	41	9.712908e+000	0	0	0	0	0	0	227.256	1	1	45.4864	41.4167
DATA	2571	31	21	0	0	A_42_P665509	NM_053777	10394.4	403.573	2.516315e+004	2.516316e+003	24198	40.5	6.639250e+000	0	0	0	0	0	0	24574.7	1	1	57.5363	40.7188
DATA	2572	31	22	0	0	A_44_P250144	NM_001001373	10419.6	403.573	4.707369e+000	2.576635e+000	66	40.5	8.812414e+000	0	0	0	0	0	0	4.60216	1	0	57.5363	41.0882
DATA	2573	31	23	0	0	A_42_P746838	NM_001024286	10444.8	403.81	8.994773e+000	2.686100e+000	71	36	7.785505e+000	0	0	0	0	0	0	8.80155	1	0	43.7019	36.1471
DATA	2574	31	24	0	0	A_44_P210852	NM_001034187	10470.4	403.573	4.569035e+001	5.222453e+000	109	36	8.169116e+000	0	0	0	0	0	0	44.7373	1	1	57.5363	38.9714
DATA	2575	31	25	0	0	A_64_P019390	A_64_P019390	10495.3	403.329	1.482016e+001	2.930711e+000	78	35	5.678908e+000	0	0	0	0	0	0	14.517	1	1	47.2035	34.8
DATA	2576	31	26	0	0	A_64_P134709	NM_001105760	10520.9	403.771	8.010776e+001	8.400098e+000	142	38	5.955931e+000	0	0	0	0	0	0	78.4909	1	1	46.8651	37.1613
DATA	2578	31	28	0	0	A_64_P028117	NM_001000372	10571.9	403.614	3.021393e+001	3.939634e+000	91	42	8.754665e+000	0	0	0	0	0	0	29.5976	1	1	65	43.5313
DATA	2579	31	29	0	0	A_44_P391517	NM_001034144	10597.4	403.573	2.012849e+002	2.028678e+001	260	36	8.950298e+000	0	0	0	0	0	0	197.092	1	1	57.5363	37.7941
DATA	2580	31	30	0	0	A_42_P743682	NM_133599	10622.6	403.573	3.697702e+001	4.480944e+000	98.5	39	6.789867e+000	0	0	0	0	0	0	36.1833	1	1	57.5363	39.0333
DATA	2581	31	31	0	0	A_64_P163075	NM_001109321	10648.1	403.935	1.361161e+001	2.875661e+000	77	37	8.271166e+000	0	0	0	0	0	0	13.3082	1	1	54.4085	37.7073
DATA	2582	31	32	0	0	A_44_P393422	NM_001013188	10673.5	404	7.787628e+002	7.791755e+001	832	39.5	7.776878e+000	0	0	0	0	0	0	760.571	1	1	54.1152	39.3125
DATA	2583	31	33	0	0	A_44_P288982	NM_001107913	10698.9	403.652	3.171355e+001	4.062726e+000	93.5	36.5	7.125318e+000	0	0	0	0	0	0	30.9306	1	1	45.835	36.4375
DATA	2584	31	34	0	0	A_64_P009788	NM_001191099	10724.7	403.524	1.306493e+001	2.859306e+000	72	39	8.091164e+000	0	0	0	0	0	0	12.7222	1	1	44.4243	38.8205
DATA	2585	31	35	0	0	A_42_P764228	NM_031707	10749.7	404	1.344041e+003	1.344283e+002	1377	37	5.772925e+000	0	0	0	0	0	0	1306.59	1	1	50.4627	36.92
DATA	2586	31	36	0	0	A_64_P161621	NM_001101015	10775.1	404.096	2.007843e+002	2.024004e+001	254.5	40	9.336613e+000	0	0	0	0	0	0	194.806	1	1	46.8651	40.8788
DATA	2587	31	37	0	0	A_42_P763522	NM_001013980	10800.3	403.914	1.015359e+003	1.015681e+002	1059	39	8.363950e+000	0	0	0	0	0	0	982.974	1	1	49.5074	40.7931
DATA	2588	31	38	0	0	A_64_P029935	NM_001109299	10825.7	403.895	4.784147e+002	4.791015e+001	525	36	6.128951e+000	0	0	0	0	0	0	462.05	1	1	48.8603	38.2759
DATA	2589	31	39	0	0	A_64_P045053	A_64_P045053	10851	404.203	2.340199e+002	2.354279e+001	288	41	7.824869e+000	0	0	0	0	0	0	225.441	1	1	46.8651	42.1667
DATA	2590	31	40	0	0	A_42_P540920	NM_001135045	10876.1	404.214	1.473157e+003	1.473382e+002	1513.5	47	9.433803e+000	0	0	0	0	0	0	1415.26	1	1	46.8651	43.9429
DATA	2591	31	41	0	0	A_64_P055323	NM_001191930	10902	404	1.617276e+002	1.637818e+001	219	42	9.564288e+000	0	0	0	0	0	0	154.896	1	1	46.8651	41.2195
DATA	2592	31	42	0	0	A_64_P047162	NM_153472	10927.2	404	2.161671e+003	2.161826e+002	2118	43	1.113566e+001	0	0	0	0	0	0	2063.89	1	1	46.8651	43.3243
DATA	2593	31	43	0	0	A_64_P279594	NM_001170476	10952.9	404.161	1.595310e+001	3.052720e+000	74	42	1.280326e+001	0	0	0	0	0	0	15.1804	1	1	45.1352	41.4865
DATA	2594	31	44	0	0	A_42_P665509	NM_053777	10978.4	404.427	2.575197e+004	2.575198e+003	24235.5	38.5	7.970713e+000	0	0	0	0	0	0	24419.2	1	1	57.5363	39.125
DATA	2595	31	45	0	0	A_64_P106638	NM_001108198	11003.4	404.167	4.660718e+001	5.347320e+000	108.5	38	6.085740e+000	0	0	0	0	0	0	44.0342	1	1	47.8731	37.5833
DATA	2596	31	46	0	0	A_64_P141245	NM_001105920	11029	404.455	6.311202e+002	6.316685e+001	648	40.5	6.906407e+000	0	0	0	0	0	0	594.015	1	1	55.8519	40.4615
DATA	2597	31	47	0	0	A_42_P503739	FQ231471	11054.1	404.352	5.534407e+003	5.534470e+002	5038	39	5.812476e+000	0	0	0	0	0	0	5188.61	1	1	47.8731	38.2571
DATA	2598	31	48	0	0	A_44_P282433	NM_033230	11079.7	404.167	3.601909e+002	3.611664e+001	399	39.5	7.697316e+000	0	0	0	0	0	0	336.291	1	1	47.8731	38.7143
DATA	2599	31	49	0	0	A_42_P585750	NM_001202463	11105.1	404.281	8.113575e+000	2.784640e+000	69.5	38	7.540033e+000	0	0	0	0	0	0	7.5435	1	0	45.4864	37.8286
DATA	2600	31	50	0	0	A_42_P523517	FQ229104	11130.2	404	2.307979e+003	2.308134e+002	2133	38.5	6.903266e+000	0	0	0	0	0	0	2136.6	1	1	46.8651	39.2647
DATA	2601	31	51	0	0	A_64_P126190	NM_001113789	11156	404.455	1.313518e+001	2.991027e+000	73	44	1.045535e+001	0	0	0	0	0	0	12.1061	1	0	55.8519	43.5758
DATA	2602	31	52	0	0	A_42_P549675	NM_080577	11181.1	404.232	2.015205e+003	2.015386e+002	1856.5	41	8.753494e+000	0	0	0	0	0	0	1849.04	1	1	46.5243	39.9032
DATA	2603	31	53	0	0	A_42_P535644	NM_024400	11206.6	404.427	1.560933e+002	1.584310e+001	206.5	39	7.228230e+000	0	0	0	0	0	0	142.571	1	1	57.5363	39.2258
DATA	2604	31	54	0	0	A_64_P050233	XM_345239	11232.3	404.5	1.299927e+002	1.328167e+001	182	37	9.061476e+000	0	0	0	0	0	0	118.177	1	1	57.5363	39.6
DATA	2605	31	55	0	0	A_64_P121575	NM_001013144	11257.5	404.5	3.823632e+001	4.702214e+000	96	35	9.055385e+000	0	0	0	0	0	0	34.6004	1	1	57.5363	38.6667
DATA	2606	31	56	0	0	A_64_P018263	NM_012728	11282.7	404.5	2.612923e+002	2.627351e+001	301.5	40	1.026209e+001	0	0	0	0	0	0	235.347	1	1	49.1849	39.8148
DATA	2607	31	57	0	0	A_64_P164682	TC600307	11308	404.061	4.679588e+003	4.679669e+002	4239	40	7.314887e+000	0	0	0	0	0	0	4194.92	1	1	46.8651	38.5152
DATA	2608	31	58	0	0	A_44_P1045612	NM_172317	11333.5	404.181	2.174801e+002	2.192444e+001	256	37	1.144252e+001	0	0	0	0	0	0	194.042	1	1	47.8731	40.2581
DATA	2609	31	59	0	0	A_42_P529514	NM_001008308	11359.2	404.268	2.026408e+002	2.045510e+001	240	43	9.573718e+000	0	0	0	0	0	0	179.95	1	1	47.2035	42.7857
DATA	2610	31	60	0	0	A_44_P870348	NM_001107522	11384.3	404.217	1.130320e+002	1.164526e+001	160	40	7.564098e+000	0	0	0	0	0	0	99.9163	1	1	46.8651	39.5417
DATA	2611	31	61	0	0	A_64_P108264	XM_223835	11409.7	404.5	5.096282e+001	5.821805e+000	107	39	9.529433e+000	0	0	0	0	0	0	44.8455	1	1	57.5363	39.3143
DATA	2612	31	62	0	0	A_42_P754784	CB328432	11434.9	404.534	2.817077e+003	2.817219e+002	2547	38.5	8.144479e+000	0	0	0	0	0	0	2467.86	1	1	48.5334	38.1944
DATA	2613	31	63	0	0	A_64_P084525	NM_001101001	11460.5	404.5	6.950095e+002	6.955894e+001	654	35	1.019922e+001	0	0	0	0	0	0	606.157	1	1	46.5243	37.9
DATA	2614	31	64	0	0	A_64_P378583	NM_001099516	11486.1	404.5	2.862609e+000	2.855814e+000	65	39	8.795815e+000	0	0	0	0	0	0	1.2831	0	0	65	39.4595
DATA	2615	31	65	0	0	A_64_P154172	NM_001000557	11512.3	404.839	2.874724e+000	2.864059e+000	57.5	41	1.003398e+001	0	0	0	0	0	0	-4.34531	0	0	44.4243	40.7143
DATA	2616	31	66	0	0	A_64_P074634	NM_001024287	11536.9	404.757	1.711548e+002	1.735530e+001	207	42	1.221909e+001	0	0	0	0	0	0	147.432	1	1	46.5243	41.8846
DATA	2617	31	67	1028	1	(+)E1A_r60_a22	E1A_r60_a22	11562.1	404.442	1.531876e+002	1.558828e+001	191	43	8.956655e+000	0	0	0	0	0	0	131.45	1	1	49.1849	41.3103
DATA	2618	31	68	0	0	A_43_P12780	NM_053350	11587.5	404.606	6.015826e+001	6.676856e+000	111	41	8.841982e+000	0	0	0	0	0	0	51.4367	1	1	47.8731	39.2258
DATA	2619	31	69	0	0	A_44_P442169	NM_001013034	11613.1	404.527	1.888058e+003	1.888282e+002	1661	38	9.057839e+000	0	0	0	0	0	0	1608.83	1	1	53.8203	38.1111
DATA	2620	31	70	0	0	A_64_P093894	A_64_P093894	11638.6	404.568	1.994172e+001	3.532382e+000	77.5	38	8.100508e+000	0	0	0	0	0	0	16.9392	1	1	49.1849	38.8148
DATA	2621	31	71	0	0	A_64_P073378	NM_001025287	11663.3	404.746	2.646265e+002	2.662367e+001	288	36	7.487899e+000	0	0	0	0	0	0	224.166	1	1	47.5395	37.1471
DATA	2622	31	72	0	0	A_64_P096076	A_64_P096076	11689.4	404.573	2.942379e+000	2.931462e+000	56.5	40.5	9.353160e+000	0	0	0	0	0	0	-3.88413	0	0	65	40.6333
DATA	2623	31	73	0	0	A_42_P471835	TC610276	11714.2	404.425	1.224741e+003	1.225094e+002	1084	34	1.266720e+001	0	0	0	0	0	0	1032.44	1	1	48.5334	40.5161
DATA	2624	31	74	0	0	A_42_P767737	AY724480	11739.8	404.533	1.463339e+003	1.463635e+002	1308	36	1.173799e+001	0	0	0	0	0	0	1231.26	1	1	49.5074	41.0303
DATA	2625	31	75	0	0	A_64_P016393	A_64_P016393	11765.2	404.632	1.854780e+003	1.855014e+002	1661	37	7.540562e+000	0	0	0	0	0	0	1558.29	1	1	52.3208	37.5588
DATA	2626	31	76	0	0	A_42_P803752	XM_580093	11790.1	404.714	1.846842e+001	3.481278e+000	76	39	9.409275e+000	0	0	0	0	0	0	15.4997	1	1	46.8651	40.7714
DATA	2627	31	77	0	0	A_42_P589025	NM_134363	11816.4	404.931	2.456474e+004	2.456476e+003	19757	41	7.153365e+000	0	0	0	0	0	0	20602.6	1	1	53.8203	41.5278
DATA	2628	31	78	0	0	A_64_P107938	NM_001000930	11841.9	404.627	2.964691e+000	2.966507e+000	62	36.5	5.171096e+000	0	0	0	0	0	0	2.30952	0	0	45.835	36.8667
DATA	2629	31	79	0	0	A_64_P088817	A_64_P088817	11866.6	405.068	2.174415e+002	2.194370e+001	244	37	7.560864e+000	0	0	0	0	0	0	182.389	1	1	48.5334	37.8
DATA	2630	31	80	0	0	A_64_P000579	A_64_P000579	11892.1	404.896	7.050104e+003	7.050165e+002	6078	38	9.155510e+000	0	0	0	0	0	0	5918.17	1	1	46.8651	38.8519
DATA	2631	31	81	0	0	A_44_P570046	TC630334	11917.7	404.667	1.374125e+002	1.405359e+001	179.5	40.5	7.328552e+000	0	0	0	0	0	0	115.503	1	1	46.8651	40.8214
DATA	2632	31	82	0	0	A_44_P431629	NM_001106835	11942.9	405.045	6.467157e+001	7.104296e+000	114	40	6.176429e+000	0	0	0	0	0	0	54.4688	1	1	46.8651	40.7
DATA	2634	31	84	0	0	A_42_P485932	NM_001034927	11993.8	404.806	6.231918e+003	6.231986e+002	5202	40	7.823141e+000	0	0	0	1	0	0	5278.86	1	1	47.5395	38.8077
DATA	2635	31	85	66	1	DarkCorner	DarkCorner	12019.5	405	2.923056e+000	2.912212e+000	57	41	7.831190e+000	0	0	0	0	0	0	-1.41491	0	0	54.1152	42.3043
DATA	2636	32	1	66	1	DarkCorner	DarkCorner	9899	410.545	2.674651e+000	2.664727e+000	58	36	8.124993e+000	0	0	0	0	0	0	-4.06367	0	0	55.8519	37.2791
DATA	2637	32	2	0	0	A_64_P048366	ENSRNOT00000059330	9924.21	410.463	6.664421e+002	6.669712e+001	695	41	6.288430e+000	0	0	0	0	0	0	621.419	1	1	46.5243	40.5625
DATA	2638	32	3	0	0	A_44_P1058980	NM_001012036	9949.5	410.788	6.724958e+002	6.730167e+001	708.5	43	6.716185e+000	0	0	0	0	0	0	629.15	1	1	46.5243	42.75
DATA	2639	32	4	0	0	A_64_P062562	ENSRNOT00000027655	9975.01	410.702	3.336442e+001	4.253723e+000	94	43.5	8.107083e+000	0	0	0	0	0	0	31.3164	1	1	45.835	42.7813
DATA	2640	32	5	0	0	A_44_P490100	ENSRNOT00000043641	10000.1	411.081	1.956652e+001	3.278032e+000	80	42	6.561734e+000	0	0	0	0	0	0	18.4255	1	1	45.1352	42.0278
DATA	2641	32	6	0	0	A_42_P473886	NM_001165922	10026	410.545	1.683948e+002	1.704233e+001	223	42.5	7.564089e+000	0	0	0	0	0	0	159.082	1	1	55.8519	42.1667
DATA	2642	32	7	0	0	A_64_P393339	ENSRNOT00000057753	10051.5	411.292	6.597457e+001	7.096109e+000	121.5	43	1.126676e+001	0	0	0	0	0	0	62.5294	1	1	47.2035	43.8387
DATA	2643	32	8	0	0	A_44_P461154	NM_053819	10076.7	411.06	1.085937e+003	1.086249e+002	1098	38	7.796746e+000	0	0	0	0	0	0	1032.34	1	1	45.835	39.4516
DATA	2644	32	9	0	0	A_42_P701991	NM_001100671	10101.9	410.768	1.287132e+003	1.287394e+002	1263	38	7.774603e+000	0	0	0	0	0	0	1227.21	1	1	46.5243	39.1111
DATA	2645	32	10	1028	1	(+)E1A_r60_1	E1A_r60_1	10127.7	411.368	2.599408e+000	2.589764e+000	60.5	42	8.510467e+000	0	0	0	0	0	0	-1.80646	0	0	48.2044	41.1463
DATA	2646	32	11	0	0	A_44_P541230	ENSRNOT00000010675	10152.7	410.9	5.941771e+002	5.947382e+001	643.5	42	1.086749e+001	0	0	0	0	0	0	569.75	1	1	47.2035	42.9667
DATA	2647	32	12	0	0	A_64_P004593	NM_001166761	10178	410.789	6.735667e+000	2.662609e+000	68	44.5	5.829375e+000	0	0	0	0	0	0	6.47588	1	0	46.8651	43.4667
DATA	2648	32	13	0	0	A_64_P018385	ENSRNOT00000063845	10204.1	410.725	2.578908e+000	2.569340e+000	61	40	6.647477e+000	0	0	0	0	0	0	-0.924274	0	0	46.1809	39.5882
DATA	2649	32	14	0	0	A_64_P017590	NM_001000096	10229.1	410.935	2.572775e+000	2.563230e+000	59	39.5	8.031411e+000	0	0	0	0	0	0	-3.89939	0	0	54.4085	39.7353
DATA	2650	32	15	0	0	A_42_P810118	XM_001075984	10254.1	410.944	2.548456e+002	2.561258e+001	292	39	8.651174e+000	0	0	0	0	0	0	246.783	1	1	46.8651	39.697
DATA	2651	32	16	0	0	A_42_P772157	NM_017020	10279.5	411.265	5.478402e+002	5.484344e+001	576	41	1.012440e+001	0	0	0	0	0	0	531.633	1	1	46.5243	41.7353
DATA	2652	32	17	0	0	A_42_P542809	NM_021671	10305.1	411.029	2.118307e+002	2.133568e+001	263.5	42	8.333636e+000	0	0	0	0	0	0	205.956	1	1	46.8651	41.7778
DATA	2653	32	18	0	0	A_42_P645352	NM_001126371	10330.6	411.028	1.425105e+003	1.425332e+002	1435	39.5	8.992371e+000	0	0	0	0	0	0	1387.99	1	1	48.2044	40.4706
DATA	2654	32	19	0	0	A_64_P106933	NM_001130493	10356	411.104	6.213824e+001	6.712497e+000	126	39.5	8.778295e+000	0	0	0	0	0	0	60.6148	1	1	46.8651	40.5385
DATA	2655	32	20	0	0	A_42_P614175	NM_033237	10381.2	411	3.842282e+002	3.850639e+001	440	40.5	7.548993e+000	0	0	0	0	0	0	375.311	1	1	46.8651	41.3889
DATA	2656	32	21	0	0	A_64_P147190	NM_031840	10406.7	410.942	9.984337e+002	9.987548e+001	1038	42	7.986969e+000	0	0	0	0	0	0	976.401	1	1	46.5243	42.6667
DATA	2657	32	22	0	0	A_43_P11268	NM_031762	10432	411.118	2.121563e+003	2.121714e+002	2141	38.5	8.288237e+000	0	0	0	0	0	0	2076.79	1	1	46.8651	38.65
DATA	2658	32	23	0	0	A_64_P022215	A_64_P022215	10457.3	411.194	1.077518e+002	1.106778e+001	169.5	37.5	8.748963e+000	0	0	0	0	0	0	105.559	1	1	45.835	37.8125
DATA	2659	32	24	0	0	A_64_P001080	NM_001109379	10483.1	411.184	4.501108e+001	5.161798e+000	106	35	7.647211e+000	0	0	0	0	0	0	44.1196	1	1	47.8731	37.3125
DATA	2660	32	25	0	0	A_42_P468662	NM_001108886	10508.1	410.778	6.359233e+002	6.364248e+001	687.5	38	5.420723e+000	0	0	0	0	0	0	623.507	1	1	45.4864	36.7931
DATA	2661	32	26	0	0	A_42_P522285	NM_001044263	10533.4	410.735	2.767423e+002	2.778924e+001	319	37	9.607922e+000	0	0	0	0	0	0	271.371	1	1	46.5243	38.6429
DATA	2662	32	27	0	0	A_42_P478500	NM_177421	10559.4	411.427	9.488463e+004	9.488464e+003	94738	39	8.697518e+000	0	0	0	0	0	0	93040.5	1	1	57.5363	40.1944
DATA	2663	32	28	0	0	A_42_P739860	NM_133578	10584.5	411.11	1.057864e+003	1.058166e+002	1077	38	8.751264e+000	0	0	0	0	0	0	1036.94	1	1	48.2044	37.7692
DATA	2664	32	29	0	0	A_42_P708614	NM_001130505	10609.9	411.352	1.824603e+004	1.824605e+003	17827	40	7.351539e+000	0	0	0	0	0	0	17875.9	1	1	47.8731	39.8293
DATA	2665	32	30	0	0	A_64_P067000	NM_001108721	10635.2	411.412	2.418369e+002	2.431565e+001	307	39	7.093109e+000	0	0	0	0	0	0	236.753	1	1	46.5243	38.7073
DATA	2666	32	31	0	0	A_44_P590748	NM_001109199	10660.4	411.538	2.354427e+001	3.457705e+000	86	39	8.374941e+000	0	0	0	0	0	0	23.0271	1	1	45.1352	39.1622
DATA	2667	32	32	0	0	A_42_P742797	NM_001106761	10685.8	411.508	1.388842e+003	1.389073e+002	1451	39.5	9.356355e+000	0	0	0	0	0	0	1356.7	1	1	45.4864	39.9
DATA	2668	32	33	0	0	A_42_P761277	NM_001008297	10711.1	411.123	6.046672e+002	6.052000e+001	638	39	8.249903e+000	0	0	0	0	0	0	589.81	1	1	46.1809	38.875
DATA	2669	32	34	0	0	A_42_P503739	FQ231471	10736.7	411.254	5.570789e+003	5.570848e+002	5270	39	6.901890e+000	0	0	0	0	0	0	5425.03	1	1	47.5395	38.9063
DATA	2670	32	35	0	0	A_42_P635760	ENSRNOT00000023806	10762.1	411.303	3.867418e+003	3.867502e+002	3874	38	7.926833e+000	0	0	0	0	0	0	3759.27	1	1	45.835	38.9375
DATA	2671	32	36	0	0	A_64_P136337	ENSRNOT00000064588	10787.4	411.284	1.465290e+003	1.465512e+002	1465	39	8.409416e+000	0	0	0	0	0	0	1421.37	1	1	48.5334	39.5806
DATA	2672	32	37	0	0	A_64_P128316	ENSRNOT00000062007	10813.2	410.899	1.129955e+001	2.797555e+000	73.5	37	7.980426e+000	0	0	0	0	0	0	10.9351	1	0	46.5243	39.4828
DATA	2673	32	38	0	0	A_64_P050799	A_64_P050799	10838.5	411.5	1.065277e+002	1.095730e+001	165	39.5	7.537560e+000	0	0	0	0	0	0	102.844	1	1	57.5363	39
DATA	2674	32	39	0	0	A_42_P701779	NM_001108048	10863.3	411.662	1.023383e+003	1.023706e+002	1017	41	8.270484e+000	0	0	0	0	0	0	985.432	1	1	48.5334	42.3514
DATA	2675	32	40	0	0	A_42_P604900	NM_199117	10889	411.5	1.737334e+003	1.737526e+002	1675.5	42	1.009115e+001	0	0	0	0	0	0	1668.03	1	1	48.5334	42.4359
DATA	2676	32	41	0	0	A_44_P1060444	NM_001106644	10914.3	411.125	1.513505e+003	1.513726e+002	1502	42	8.100692e+000	0	0	0	0	0	0	1448.63	1	1	45.1352	40.6061
DATA	2677	32	42	0	0	A_64_P090339	NM_001000756	10940.1	411.5	2.748185e+001	3.780410e+000	86	43.5	1.091925e+001	0	0	0	0	0	0	26.2189	1	1	56.9804	43.275
DATA	2678	32	43	0	0	A_42_P770556	NM_033096	10965.2	411.536	2.997967e+003	2.998080e+002	2804	41	8.677835e+000	0	0	0	1	0	0	2850.59	1	1	47.2035	40.2941
DATA	2679	32	44	0	0	A_44_P606502	NM_001130502	10990.9	411.5	8.076243e+000	2.736066e+000	69	39	8.344120e+000	0	0	0	0	0	0	7.65144	1	0	65	39.9286
DATA	2680	32	45	0	0	A_64_P372189	NM_212516	11016.4	411.573	2.252959e+004	2.252960e+003	20955	38	5.909185e+000	0	0	0	0	0	0	21264.8	1	1	57.5363	38.0385
DATA	2681	32	46	0	0	A_42_P540518	NM_199399	11041.4	411.63	1.371788e+003	1.372041e+002	1324	39	6.889344e+000	0	0	0	0	0	0	1289.87	1	1	48.2044	38.0345
DATA	2682	32	47	0	0	A_64_P158955	ENSRNOT00000020260	11067.1	411.5	4.695937e+000	2.686087e+000	67	39	6.019743e+000	0	0	0	0	0	0	4.39751	1	0	56.9804	38.3611
DATA	2683	32	48	0	0	A_44_P325841	NM_024130	11092.3	411.775	9.200117e+002	9.203948e+001	919	40	7.058587e+000	0	0	0	0	0	0	858.05	1	1	47.2035	40.0968
DATA	2684	32	49	0	0	A_64_P007743	XM_001071416	11117.4	411.657	7.971950e+001	8.406151e+000	136.5	39	8.325621e+000	0	0	0	0	0	0	74.0376	1	1	47.8731	39.9143
DATA	2685	32	50	0	0	A_64_P136213	A_64_P136213	11143.4	411.573	2.688652e+000	2.678677e+000	61	41	8.816041e+000	0	0	0	0	0	0	-1.51569	0	0	57.5363	39.5484
DATA	2686	32	51	0	0	A_43_P17392	NM_001191693	11168.2	411.412	1.534222e+003	1.534458e+002	1410	44	1.038948e+001	0	0	0	0	0	0	1412.34	1	1	46.5243	43.3
DATA	2687	32	52	0	0	A_42_P708569	NM_001191837	11193.7	411.5	3.798949e+003	3.799045e+002	3590	36	7.499580e+000	0	0	0	0	0	0	3481.34	1	1	46.5243	37.8571
DATA	2688	32	53	0	0	A_64_P062068	XM_002728030	11219	412.048	1.221750e+002	1.251548e+001	174	43	1.001840e+001	0	0	0	0	0	0	111.46	1	1	45.4864	43.4444
DATA	2689	32	54	0	0	A_43_P20266	NM_001106416	11244.4	411.951	1.226846e+002	1.256796e+001	172	40	8.546898e+000	0	0	0	0	0	0	111.406	1	1	44.0646	40.129
DATA	2690	32	55	0	0	A_44_P248235	NM_001106048	11270.4	411.573	2.995741e+001	4.060228e+000	90	39	7.426343e+000	0	0	0	0	0	0	27.072	1	1	57.5363	39.2333
DATA	2691	32	56	0	0	A_64_P134717	NM_001101007	11295.4	411.587	6.692967e+000	2.833462e+000	69	40	7.716019e+000	0	0	0	0	0	0	6.02051	1	0	49.5074	37.5862
[truncated: 6,316,724 more chars]
