# Supplementary material for: Gene Expression in the Hippocampus in a Rat Model of Premenstrual Dysphoric Disorder After Treatment With Baixiangdan Capsules
Source: Front Psychol. 2018 Nov 13;9:2065. doi: 10.3389/fpsyg.2018.02065 (PMC6242977; doi:10.3389/fpsyg.2018.02065)
Supplement: Supplementary file 2 [file Data_Sheet_2.ZIP › Raw Data Files/3_1.txt]

TYPE	text	text	text	integer	text	float	float	text	integer	text	text	integer	integer	integer	integer	float	float	float	float	float	float	text	text	text	text	text	text	text	text	text	text	text	integer	integer	integer	text	integer	boolean
FEPARAMS	Protocol_Name	Protocol_date	Scan_ScannerName	Scan_NumChannels	Scan_Date	Scan_MicronsPerPixelX	Scan_MicronsPerPixelY	Scan_OriginalGUID	Scan_NumScanPass	Grid_Name	Grid_Date	Grid_NumSubGridRows	Grid_NumSubGridCols	Grid_NumRows	Grid_NumCols	Grid_RowSpacing	Grid_ColSpacing	Grid_OffsetX	Grid_OffsetY	Grid_NomSpotWidth	Grid_NomSpotHeight	Grid_GenomicBuild	FeatureExtractor_Barcode	FeatureExtractor_Sample	FeatureExtractor_ScanFileName	FeatureExtractor_ArrayName	FeatureExtractor_ScanFileGUID	FeatureExtractor_DesignFileName	FeatureExtractor_ExtractionTime	FeatureExtractor_UserName	FeatureExtractor_ComputerName	FeatureExtractor_Version	FeatureExtractor_IsXDRExtraction	FeatureExtractor_ColorMode	FeatureExtractor_QCReportType	DyeNorm_NormFilename	DyeNorm_NormNumProbes	Grid_IsGridFile
DATA	GE1_1100_Jul11 (Read Only)	1-Jul-2011 22:30	Agilent Technologies Scanner G2505C US10450393	1	07-19-2013 10:55:47	5	5	891b3bcf-7e8d-49b3-9f1b-211571655d1e	1	028282_D_F_20120224	24-Feb-2012 00:00	1	1	532	85	73.3235	63.5	0	36.6617	65	65	rn4:RGSCv3.4:Nov2004	1_1		M:\2013.07.19 Rat GE 1-color 4x44k(sunpeng)\\US10450393_S01.tif	US10450393_S01	0de24e3c-411a-4c92-b222-bf3524e92ef4	028282_D_F_20120224.xml	19-Jul-2013 11:52:30	admin	KCSY01	11.0.1.1	0	0	0		0	0
*
TYPE	float	float	float	integer	integer	float	float	float	integer	float	float	float	integer	float	float	integer	integer	integer	integer	integer	float	float	float	integer	float	float	float	float	float	integer	integer	float	float	float	float	float	integer	float	float	float	float	integer	float	float	float	float	float	integer	float	float	float	float	float	float	float	integer	float	integer	float	float	float	float	integer	float	float	float	float	text	float	float	float	float	float	float	float	float	float	float	float	float	float	float	float	float	float	float	float	float	float	integer	integer	integer	integer	float	integer	text	integer	text	float	float	float	integer	boolean	float	float	boolean	float	boolean	float	boolean	float	boolean	float	boolean	float	boolean	float	boolean	float	boolean	float	boolean	float	boolean	float	boolean
STATS	gDarkOffsetAverage	gDarkOffsetMedian	gDarkOffsetStdDev	gDarkOffsetNumPts	gSaturationValue	gAvgSig2BkgeQC	gAvgSig2BkgNegCtrl	gRatioSig2BkgeQC_NegCtrl	gNumSatFeat	gLocalBGInlierNetAve	gLocalBGInlierAve	gLocalBGInlierSDev	gLocalBGInlierNum	gGlobalBGInlierAve	gGlobalBGInlierSDev	gGlobalBGInlierNum	gNumFeatureNonUnifOL	gNumPopnOL	gNumNonUnifBGOL	gNumPopnBGOL	gOffsetUsed	gGlobalFeatInlierAve	gGlobalFeatInlierSDev	gGlobalFeatInlierNum	AnyColorPrcntFeatNonUnifOL	AnyColorPrcntBGNonUnifOL	AnyColorPrcntFeatPopnOL	AnyColorPrcntBGPopnOL	TotalPrcntFeatOL	gNumNegBGSubFeat	gNonCtrlNumNegFeatBGSubSig	gSpatialDetrendRMSFit	gSpatialDetrendRMSFilteredMinusFit	gSpatialDetrendSurfaceArea	gSpatialDetrendVolume	gSpatialDetrendAveFit	gNonCtrlNumSatFeat	gNonCtrl99PrcntNetSig	gNonCtrl50PrcntNetSig	gNonCtrl1PrcntNetSig	gNonCtrlMedPrcntCVBGSubSig	gCtrleQCNumSatFeat	gCtrleQC99PrcntNetSig	gCtrleQC50PrcntNetSig	gCtrleQC1PrcntNetSig	geQCMedPrcntCVBGSubSig	geQCSig2BkgLow2	gNegCtrlNumInliers	gNegCtrlAveNetSig	gNegCtrlSDevNetSig	gNegCtrlAveBGSubSig	gNegCtrlSDevBGSubSig	gAveNumPixOLLo	gAveNumPixOLHi	gPixCVofHighSignalFeat	gNumHighSignalFeat	AddErrorEstimateGreen	TotalNumFeatures	ROIHeight	ROIWidth	CentroidDiffX	CentroidDiffY	NumFoundFeat	MaxNonUnifEdges	MaxSpotNotFoundEdges	gMultDetrendRMSFit	gMultDetrendSurfaceAverage	eQCLowSigName2	eQCOneColorLogLowSignal	eQCOneColorLogLowSignalError	eQCOneColorLogHighSignal	eQCOneColorLinFitLogLowConc	eQCOneColorLinFitLogLowSignal	eQCOneColorLinFitLogHighConc	eQCOneColorLinFitLogHighSignal	eQCOneColorLinFitSlope	eQCOneColorLinFitIntercept	eQCOneColorLinFitRSQ	eQCOneColorSpikeDetectionLimit	gNonCtrl50PrcntBGSubSig	gCtrleQC50PrcntBGSubSig	gMedPrcntCVProcSignal	geQCMedPrcntCVProcSignal	gOutlierFlagger_Auto_FeatB_Term	gOutlierFlagger_Auto_FeatC_Term	gOutlierFlagger_Auto_BgndB_Term	gOutlierFlagger_Auto_BgndC_Term	OutlierFlagger_FeatChiSq	OutlierFlagger_BgndChiSq	GriddingStatus	IsGoodGrid	NumGeneNonUnifOL	TotalNumberOfReplicatedGenes	gPercentileIntensityProcessedSignal	ExtractionStatus	QCMetricResults	gNonCtrlNumWellAboveBG	ImageDepth	AFHold	gPMTVolts	GlassThickness	gDDN	GridHasBeenOptimized	gNegCtrlSpread	Metric_IsGoodGrid	Metric_IsGoodGrid_IsInRange	Metric_AnyColorPrcntFeatNonUnifOL	Metric_AnyColorPrcntFeatNonUnifOL_IsInRange	Metric_gNegCtrlAveNetSig	Metric_gNegCtrlAveNetSig_IsInRange	Metric_gNegCtrlAveBGSubSig	Metric_gNegCtrlAveBGSubSig_IsInRange	Metric_gNegCtrlSDevBGSubSig	Metric_gNegCtrlSDevBGSubSig_IsInRange	Metric_gSpatialDetrendRMSFilteredMinusFit	Metric_gSpatialDetrendRMSFilteredMinusFit_IsInRange	Metric_gNonCntrlMedCVProcSignal	Metric_gNonCntrlMedCVProcSignal_IsInRange	Metric_gE1aMedCVProcSignal	Metric_gE1aMedCVProcSignal_IsInRange	Metric_absGE1E1aSlope	Metric_absGE1E1aSlope_IsInRange	Metric_DetectionLimit	Metric_DetectionLimit_IsInRange	Metric_gDDN	Metric_gDDN_IsInRange
DATA	7.24727	7.24727	1.71313	0	778248	1.30691	1.53847	0.84949	0	35.3864	42.6336	3.34498	43345	42.6336	3.34498	43345	6	458	25	908	7.24727	2302.19	7804.74	43791	0.0135581	0.0564921	1.03493	2.05179	0.0139935	1951	1189	1.69927	3.21751	1.00454	6.6227	67.0382	0	34039	270.44	56.0108	8.77478	0	196.043	64.2527	51.722	-1	1.32727	145	53.4448	3.20018	-6.37322	2.96886	0.454987	0.710376	0.123535	3291	3.21751	44254	4.36651	7.61785	0.745351	0.902879	41923	0	0.093985	0.0736667	1.00129	(+)E1A_r60_3	0	0	0	0	0	0	0	0	0	0	-1	210.673	4.00004	3.17967	-1	1163.87	102.143	120	58.4864	1.94491	2.50867	0	1	5	30367	1449.52	1	ExtractionEvaluate	36461	20 Bit	0	354	968.949	0	0	11.0251	1	1	0.0135581	1	53.4448	0	-6.37322	1	2.96886	1	3.21751	1	3.17967	1	-1	0	0	0	-1	0	0	1
*
TYPE	integer	integer	integer	integer	integer	text	text	float	float	float	float	float	float	float	boolean	boolean	boolean	boolean	boolean	boolean	float	boolean	boolean	float	float
FEATURES	FeatureNum	Row	Col	SubTypeMask	ControlType	ProbeName	SystematicName	PositionX	PositionY	gProcessedSignal	gProcessedSigError	gMedianSignal	gBGMedianSignal	gBGPixSDev	gIsSaturated	gIsFeatNonUnifOL	gIsBGNonUnifOL	gIsFeatPopnOL	gIsBGPopnOL	IsManualFlag	gBGSubSignal	gIsPosAndSignif	gIsWellAboveBG	SpotExtentX	gBGMeanSignal
DATA	1	1	1	260	1	GE_BrightCorner	GE_BrightCorner	439.505	175	2.435550e+004	2.435553e+003	20264.5	36	8.195901e+000	0	0	0	0	0	0	20673.8	1	1	54.1152	36.3211
DATA	2	1	2	66	1	DarkCorner	DarkCorner	464.5	175	6.697026e+000	3.830803e+000	65	36	7.986380e+000	0	0	0	0	0	0	5.71285	1	0	54.1152	36.1139
DATA	3	1	3	66	1	DarkCorner	DarkCorner	489.824	175.027	3.768021e+000	3.753013e+000	58.5	36	7.938284e+000	0	0	0	0	0	0	-1.51935	0	0	47.5395	36.4903
DATA	4	1	4	66	1	DarkCorner	DarkCorner	515.5	175	3.749143e+000	3.737120e+000	62	37	7.846557e+000	0	0	0	0	0	0	1.27039	0	0	54.1152	36.6185
DATA	5	1	5	66	1	DarkCorner	DarkCorner	540.375	174.736	3.731262e+000	3.716400e+000	60	35	7.871533e+000	0	0	0	0	0	0	-1.00115	0	0	47.5395	35.3089
DATA	6	1	6	66	1	DarkCorner	DarkCorner	566.178	174.877	3.712779e+000	3.698179e+000	61	35	8.135663e+000	0	0	0	0	0	0	0.324659	0	0	47.5395	35.0845
DATA	7	1	7	66	1	DarkCorner	DarkCorner	591.746	175.418	3.694618e+000	3.680804e+000	61	35	7.513667e+000	0	0	0	0	0	0	0.712651	0	0	46.1809	35.2587
DATA	8	1	8	66	1	DarkCorner	DarkCorner	616.575	175	3.677921e+000	3.663300e+000	61	35	7.452109e+000	0	0	0	0	0	0	0.12734	0	0	48.5334	34.9071
DATA	9	1	9	66	1	DarkCorner	DarkCorner	641.962	175.241	3.660929e+000	3.646348e+000	61	35	6.864652e+000	0	0	0	0	0	0	-0.998372	0	0	49.5074	35.0061
DATA	10	1	10	66	1	DarkCorner	DarkCorner	666.985	175.164	3.644831e+000	3.630314e+000	61.5	36	7.863380e+000	0	0	0	0	0	0	-0.301316	0	0	46.5243	36.0647
DATA	11	1	11	66	1	DarkCorner	DarkCorner	693.512	175.07	3.628331e+000	3.613879e+000	60	35	7.805996e+000	0	0	0	0	0	0	-0.987988	0	0	51.0895	35.543
DATA	12	1	12	0	0	A_64_P076162	A_64_P076162	718.37	175.397	4.603653e+001	5.843395e+000	102	36	8.245311e+000	0	0	0	0	0	0	41.1586	1	1	48.5334	36.6614
DATA	13	1	13	0	0	A_64_P002176	NM_001170551	743.567	174.761	5.213452e+002	5.225761e+001	514.5	37	8.326464e+000	0	0	0	0	0	0	467.954	1	1	46.5243	37.0133
DATA	14	1	14	0	0	A_42_P664913	NM_001108400	769.418	175.427	4.230691e+002	4.245727e+001	435	38	8.091434e+000	0	0	0	0	0	0	381.289	1	1	57.5363	38.3179
DATA	15	1	15	0	0	A_43_P13320	NM_138880	794.532	175	1.623519e+001	3.910055e+000	77	37	8.310974e+000	0	0	0	0	0	0	14.6854	1	0	49.8279	37.3372
DATA	16	1	16	0	0	A_64_P126523	A_64_P126523	820	175.455	4.336365e+001	5.600469e+000	102.5	37	8.522245e+000	0	0	0	0	0	0	39.3669	1	1	55.8519	37.585
DATA	17	1	17	0	0	A_64_P038045	XM_002730109	845.418	175.427	3.256637e+001	4.804396e+000	93	37	8.136879e+000	0	0	0	0	0	0	29.6649	1	1	57.5363	37.5481
DATA	18	1	18	0	0	A_43_P11804	NM_017066	870.311	175.662	1.064793e+004	1.064799e+003	9649	37	8.279476e+000	0	0	0	0	0	0	9729.88	1	1	48.5334	37.3973
DATA	19	1	19	0	0	A_44_P808710	XM_001069205	896.333	175.5	2.434807e+001	4.272137e+000	85	36	8.840982e+000	0	0	0	0	0	0	22.3167	1	1	65	36.9848
DATA	20	1	20	0	0	A_64_P142111	NM_001100887	921.311	175.662	8.180622e+002	8.188109e+001	819	36	8.791367e+000	0	0	0	0	0	0	751.874	1	1	48.5334	37.0098
DATA	21	1	21	0	0	A_64_P095642	A_64_P095642	946.581	175.122	1.113504e+002	1.166976e+001	163	37	9.174506e+000	0	0	0	0	0	0	102.598	1	1	48.5334	37.8646
DATA	22	1	22	0	0	A_42_P735279	NM_001004446	971.747	175.373	1.398979e+004	1.398983e+003	12984	37	8.769656e+000	0	0	0	0	0	0	12920.5	1	1	49.1849	37.831
DATA	23	1	23	0	0	A_44_P902822	XM_001063709	997.342	175.395	2.562960e+001	4.318989e+000	84	37	8.272409e+000	0	0	0	0	0	0	23.7214	1	1	49.5074	37.3969
DATA	24	1	24	0	0	A_42_P563843	NM_022263	1023.11	175.5	3.483510e+000	3.469636e+000	59.5	37	7.818783e+000	0	0	0	0	0	0	-0.874145	0	0	65	37.3405
DATA	25	1	25	0	0	A_42_P610788	NM_031544	1047.96	175.347	4.271482e+003	4.271623e+002	3964	36	7.695230e+000	0	0	0	0	0	0	3967.48	1	1	48.5334	36.874
DATA	26	1	26	0	0	A_44_P242429	NM_001134842	1073.49	175.689	1.597051e+003	1.597426e+002	1574	38	8.595352e+000	0	0	0	0	0	0	1485.55	1	1	49.1849	38.8256
DATA	27	1	27	0	0	A_64_P020571	NM_001031659	1098.92	175.595	2.539119e+002	2.562517e+001	291	39	8.437477e+000	0	0	0	0	0	0	236.462	1	1	48.8603	39.5942
DATA	28	1	28	0	0	A_42_P518462	NM_001007020	1124.11	175.644	4.408508e+003	4.408643e+002	4097	39	8.283290e+000	0	0	0	0	0	0	4109.38	1	1	48.5334	38.7784
DATA	29	1	29	0	0	A_42_P469751	XM_001054007	1149.85	175.32	1.996948e+002	2.026520e+001	243	38	8.805313e+000	0	0	0	0	0	0	186.271	1	1	49.1849	39.1803
DATA	30	1	30	0	0	A_44_P209459	NM_022387	1175.18	175.556	6.198763e+003	6.198859e+002	5725.5	38	8.631207e+000	0	0	0	0	0	0	5784.71	1	1	47.8731	38.6902
DATA	31	1	31	0	0	A_64_P018547	NM_001108717	1200.3	175.608	5.481676e+002	5.492504e+001	550	38	8.566175e+000	0	0	0	0	0	0	511.653	1	1	48.5334	37.7451
DATA	32	1	32	0	0	A_64_P111513	A_64_P111513	1226.16	175.343	2.191450e+001	4.084975e+000	83	38.5	8.562687e+000	0	0	0	0	0	0	20.4532	1	1	47.2035	38.5401
DATA	33	1	33	0	0	A_42_P493925	NM_198785	1251.57	175.392	2.150463e+002	2.177937e+001	267	39	8.361649e+000	0	0	0	0	0	0	200.645	1	1	49.1849	39.2486
DATA	34	1	34	0	0	A_64_P049828	NM_012543	1276.64	175.776	1.062737e+003	1.063297e+002	1048	39	8.566374e+000	0	0	0	0	0	0	991.054	1	1	49.5074	39.9152
DATA	35	1	35	0	0	A_64_P137927	NM_001191885	1302.34	175.689	1.773667e+002	1.806967e+001	229	41	1.026617e+001	0	0	0	0	0	0	165.268	1	1	48.5334	41.4522
DATA	36	1	36	0	0	A_43_P19848	NM_001106018	1327.99	175.797	4.256819e+001	5.483545e+000	103	38	8.640349e+000	0	0	0	0	0	0	39.6227	1	1	46.8651	39.1725
DATA	37	1	37	0	0	A_44_P308673	NM_139108	1352.79	175.417	1.855536e+002	1.887541e+001	237	38	8.379869e+000	0	0	0	0	0	0	172.492	1	1	47.8731	38.2287
DATA	38	1	38	0	0	A_64_P004269	NM_001191660	1378.14	175.768	1.013068e+003	1.013660e+002	995.5	36	7.708770e+000	0	0	0	0	0	0	940.34	1	1	46.1809	36.0586
DATA	39	1	39	0	0	A_42_P543670	NM_012572	1403.44	175.633	1.418355e+002	1.460244e+001	191.5	36	8.275388e+000	0	0	0	0	0	0	131.42	1	1	50.4627	37.1374
DATA	40	1	40	0	0	A_64_P164696	TC605704	1429.5	175.648	3.493559e+000	3.479644e+000	62.5	39	8.766498e+000	0	0	0	0	0	0	-2.30064	0	0	57.5363	39.2973
DATA	41	1	41	0	0	A_64_P055763	NM_001191822	1454.56	175.675	7.168690e+003	7.168775e+002	6747.5	39	8.022046e+000	0	0	0	0	0	0	6614.07	1	1	49.8279	38.8164
DATA	42	1	42	0	0	A_64_P068622	NM_001013056	1480	176.078	1.083502e+003	1.084066e+002	1046	38	8.630691e+000	0	0	0	0	0	0	997.242	1	1	46.1809	39.0214
DATA	43	1	43	0	0	A_44_P915877	XM_001065403	1505.5	176	1.659269e+002	1.695890e+001	205	39	8.682828e+000	0	0	0	0	0	0	152.306	1	1	54.1152	39.8214
DATA	44	1	44	0	0	A_42_P647599	NM_024129	1530.39	176.108	1.885379e+002	1.917868e+001	239	39	7.931965e+000	0	0	0	0	0	0	172.573	1	1	48.5334	39.3495
DATA	45	1	45	0	0	A_42_P798776	XM_002725203	1556.13	175.676	2.984110e+003	2.984318e+002	2723	38	7.756558e+000	0	0	0	0	0	0	2722.78	1	1	45.835	37.8355
DATA	46	1	46	0	0	A_42_P781735	NM_053319	1581.5	176	6.070727e+004	6.070728e+003	54831	38	8.370581e+000	0	0	0	0	0	0	55210	1	1	54.1152	38.4638
DATA	47	1	47	0	0	A_42_P553611	TC630296	1606.59	175.685	2.603517e+003	2.603759e+002	2361	37	8.602830e+000	0	0	0	0	0	0	2359.56	1	1	47.8731	37.4614
DATA	48	1	48	0	0	A_43_P12729	NM_032615	1632.34	175.909	2.541400e+003	2.541650e+002	2310	39	9.257636e+000	0	0	0	0	0	0	2294.74	1	1	49.1849	39.2746
DATA	49	1	49	0	0	A_42_P507072	FQ213070	1657.56	175.973	2.265851e+003	2.266134e+002	2110	38	8.955885e+000	0	0	0	0	0	0	2038.13	1	1	48.5334	39.0351
DATA	50	1	50	0	0	A_42_P645467	NM_001108804	1683.29	176	2.177490e+001	4.200112e+000	84	39	8.733351e+000	0	0	0	0	0	0	19.507	1	1	47.8731	38.7554
DATA	51	1	51	0	0	A_42_P738431	NM_019175	1708.28	176.095	1.287721e+003	1.288226e+002	1184.5	38	8.356005e+000	0	0	0	0	0	0	1148.88	1	1	48.8603	38.7129
DATA	52	1	52	0	0	A_42_P712297	NM_001135583	1733.69	176.014	4.144504e+003	4.144662e+002	3602	39	8.457757e+000	0	0	0	0	0	0	3681.69	1	1	47.2035	39.3688
DATA	53	1	53	0	0	A_42_P657538	NM_001008362	1759.31	176.014	1.703597e+003	1.703986e+002	1517	41	8.484902e+000	0	0	0	0	0	0	1506.57	1	1	47.2035	41.0218
DATA	54	1	54	0	0	A_42_P515405	NM_212505	1784.81	176.086	2.070457e+002	2.102472e+001	249	42	8.861248e+000	0	0	0	0	0	0	182.26	1	1	46.8651	42.6052
DATA	55	1	55	0	0	A_64_P089886	NM_053476	1810.09	176.167	1.860759e+003	1.861121e+002	1646	40	8.842985e+000	0	0	0	0	0	0	1630.38	1	1	46.1809	40.5514
DATA	56	1	56	0	0	A_42_P528580	NM_001107528	1835.07	176.071	2.893049e+003	2.893285e+002	2512	40	8.681668e+000	0	0	0	0	0	0	2522.92	1	1	46.8651	40.2725
DATA	57	1	57	0	0	A_43_P14285	NM_001034145	1860.73	176.137	5.579651e+003	5.579774e+002	4874	39	9.008454e+000	0	0	0	0	0	0	4841.9	1	1	48.2044	39.7753
DATA	58	1	58	0	0	A_42_P616287	NM_001134555	1886.33	176.6	1.301230e+002	1.353530e+001	178	39	8.669469e+000	0	0	0	0	0	0	112.359	1	1	50.7771	38.6673
DATA	59	1	59	0	0	A_42_P496411	NM_001109410	1911.38	176.237	2.952415e+003	2.952653e+002	2546.5	39	8.572019e+000	0	0	0	0	0	0	2536.71	1	1	49.1849	39.4178
DATA	60	1	60	0	0	A_44_P494310	NM_001009604	1936.88	176.459	3.822493e+003	3.822679e+002	3229.5	39	8.722076e+000	0	0	0	0	0	0	3267.69	1	1	48.8603	39.6462
DATA	61	1	61	0	0	A_42_P645142	NM_019375	1962.21	176.069	4.608959e+002	4.624458e+001	439	40	9.021827e+000	0	0	0	1	0	0	391.992	1	1	46.8651	39.9404
DATA	62	1	62	0	0	A_64_P042132	AABR03024196	1987.88	176.267	8.708867e+003	8.708950e+002	7576	38	9.302652e+000	0	0	0	0	0	0	7368.86	1	1	52.3208	39.1612
DATA	63	1	63	0	0	A_42_P508085	NM_001009620	2013.18	176.361	1.454319e+003	1.454821e+002	1224	39	9.220538e+000	0	0	0	0	0	0	1224.31	1	1	47.8731	39.5566
DATA	64	1	64	0	0	A_64_P051159	NM_001100684	2038.58	176.427	8.721011e+002	8.729467e+001	808	38	8.580422e+000	0	0	0	0	0	0	730.451	1	1	57.5363	38.4289
DATA	65	1	65	0	0	A_64_P124041	ENSRNOT00000019667	2064.31	176.365	6.615158e+001	7.659579e+000	117.5	38	8.908778e+000	0	0	0	0	0	0	55.1237	1	1	48.5334	38.6164
DATA	66	1	66	0	0	A_64_P131122	XR_086302	2089.58	176.427	6.281317e+001	7.383275e+000	110	37	8.184531e+000	0	0	0	0	0	0	52.0823	1	1	57.5363	37.9028
DATA	67	1	67	0	0	A_64_P021601	NM_031737	2115.09	176.446	4.550233e+001	5.992685e+000	104	37	7.998597e+000	0	0	0	0	0	0	37.5425	1	1	48.8603	37.3004
DATA	68	1	68	0	0	A_44_P776423	NM_001017386	2140.07	176.732	1.041411e+004	1.041419e+003	8545.5	37	8.512399e+000	0	0	0	0	0	0	8551.76	1	1	47.5395	37.6455
DATA	69	1	69	0	0	A_64_P120445	NM_080694	2165.67	176.5	4.324211e+001	5.847987e+000	98	37.5	8.682019e+000	0	0	0	0	0	0	35.3394	1	1	57.5363	38.1434
DATA	70	1	70	0	0	A_42_P772878	NM_001011936	2190.59	176.436	1.980157e+003	1.980552e+002	1652.5	38	8.142015e+000	0	0	0	0	0	0	1610.97	1	1	50.1463	38.276
DATA	71	1	71	0	0	A_42_P736315	NM_001108321	2216.37	176.373	9.143847e+002	9.152474e+001	773	37	7.537009e+000	0	0	0	0	0	0	740.542	1	1	48.8603	37.66
DATA	73	1	73	0	0	A_64_P041004	NM_001108599	2267.07	176.507	1.301046e+004	1.301052e+003	10173	37	8.173470e+000	0	0	0	0	0	0	10449.3	1	1	48.5334	37.977
DATA	74	1	74	0	0	A_42_P494276	NM_001109663	2292.57	176.608	5.523909e+002	5.538530e+001	490	37	8.407711e+000	0	0	0	0	0	0	441.931	1	1	49.1849	37.6865
DATA	75	1	75	66	1	DarkCorner	DarkCorner	2318.33	176.5	4.052798e+000	4.036655e+000	62	38	9.181969e+000	0	0	0	0	0	0	-1.27537	0	0	57.5363	38.6531
DATA	76	1	76	66	1	DarkCorner	DarkCorner	2343.5	176.5	4.066397e+000	4.050201e+000	59	39	8.362005e+000	0	0	0	0	0	0	-3.15608	0	0	65	39.4125
DATA	77	1	77	66	1	DarkCorner	DarkCorner	2368.89	176.767	4.078902e+000	4.062655e+000	57.5	40	8.461557e+000	0	0	0	0	0	0	-4.1333	0	0	47.8731	40.6243
DATA	78	1	78	66	1	DarkCorner	DarkCorner	2394.42	176.573	4.090442e+000	4.074150e+000	59.5	39	8.518990e+000	0	0	0	0	0	0	-3.22355	0	0	57.5363	39.6541
DATA	79	1	79	66	1	DarkCorner	DarkCorner	2419.8	176.488	4.100540e+000	4.084208e+000	58	39	8.467424e+000	0	0	0	0	0	0	-3.11123	0	0	52.3208	39.7674
DATA	80	1	80	66	1	DarkCorner	DarkCorner	2444.47	176.453	4.108952e+000	4.093225e+000	60.5	39	8.469820e+000	0	0	0	0	0	0	0.568653	0	0	49.1849	39.5472
DATA	81	1	81	66	1	DarkCorner	DarkCorner	2470.85	176.764	4.116167e+000	4.099772e+000	63	39	8.820382e+000	0	0	0	0	0	0	-0.746244	0	0	47.8731	39.7977
DATA	82	1	82	66	1	DarkCorner	DarkCorner	2495.89	176.5	4.121596e+000	4.105179e+000	61	39	8.489484e+000	0	0	0	0	0	0	-0.325272	0	0	65	39.7045
DATA	83	1	83	66	1	DarkCorner	DarkCorner	2521.38	176.792	4.125075e+000	4.108644e+000	60	38	8.494205e+000	0	0	0	0	0	0	-0.743521	0	0	47.8731	38.8929
DATA	84	1	84	260	1	GE_BrightCorner	GE_BrightCorner	2546.58	176.573	3.075386e+004	3.075389e+003	23972	38	8.583978e+000	0	0	0	0	0	0	24073.2	1	1	57.5363	38.5781
DATA	85	1	85	260	1	GE_BrightCorner	GE_BrightCorner	2571.76	176.582	2.972306e+004	2.972309e+003	23157.5	38	8.443723e+000	0	0	0	0	0	0	23268.1	1	1	53.2255	38.9389
DATA	86	2	1	260	1	GE_BrightCorner	GE_BrightCorner	451.561	182.402	2.654259e+004	2.654262e+003	21937	37	8.423539e+000	0	0	0	0	0	0	22615.7	1	1	51.4001	37.4101
DATA	87	2	2	66	1	DarkCorner	DarkCorner	477.111	182.903	3.772057e+000	3.775593e+000	62.5	36	8.115337e+000	0	0	0	0	0	0	3.20215	0	0	46.8651	36.2828
DATA	88	2	3	66	1	DarkCorner	DarkCorner	502.814	182.57	3.753466e+000	3.738760e+000	60	36	8.469401e+000	0	0	0	0	0	0	0.367841	0	0	52.3208	36.7163
DATA	89	2	4	66	1	DarkCorner	DarkCorner	527.736	182.681	3.735376e+000	3.720499e+000	59	36	7.889141e+000	0	0	0	0	0	0	0.0185249	0	0	48.2044	36.649
DATA	90	2	5	66	1	DarkCorner	DarkCorner	553.418	182.427	3.717254e+000	3.702448e+000	58	34	7.913279e+000	0	0	0	0	0	0	-1.34525	0	0	57.5363	34.3662
DATA	91	2	6	66	1	DarkCorner	DarkCorner	578.29	181.952	3.700152e+000	3.685414e+000	57	35	8.109609e+000	0	0	0	0	0	0	-1.3274	0	0	45.1352	36.2622
DATA	92	2	7	66	1	DarkCorner	DarkCorner	604.319	182.819	3.681861e+000	3.667196e+000	57	34	6.792424e+000	0	0	0	0	0	0	-3.9867	0	0	54.1152	34.0051
DATA	93	2	8	66	1	DarkCorner	DarkCorner	629.494	182.139	3.665450e+000	3.650851e+000	57	35	7.536500e+000	0	0	0	0	0	0	-4.85934	0	0	50.4627	35.2977
DATA	94	2	9	66	1	DarkCorner	DarkCorner	654.893	182.5	3.648788e+000	3.634255e+000	56	35	7.532185e+000	0	0	0	0	0	0	-4.26432	0	0	56.9804	35.8731
DATA	95	2	10	66	1	DarkCorner	DarkCorner	680.418	182.573	3.632711e+000	3.618242e+000	58.5	36	7.796218e+000	0	0	0	0	0	0	-4.19305	0	0	57.5363	36.177
DATA	96	2	11	0	0	A_44_P212746	ENSRNOT00000049707	705.786	182.214	1.790418e+001	4.023400e+000	75	35	8.016452e+000	0	0	0	0	0	0	15.9883	1	0	46.8651	35.4146
DATA	97	2	12	0	0	A_64_P103615	NM_001107179	731.107	182.5	5.165672e+001	6.289620e+000	106.5	37	7.996973e+000	0	0	0	0	0	0	46.3203	1	1	56.9804	36.7696
DATA	98	2	13	0	0	A_44_P550697	NM_001106400	756.5	182.5	1.670017e+002	1.707833e+001	207.5	36	7.917448e+000	0	0	0	0	0	0	150.344	1	1	57.5363	37.2749
DATA	99	2	14	0	0	A_64_P045429	A_64_P045429	781.855	182.768	7.305342e+001	8.126761e+000	129	38	7.144659e+000	0	0	0	0	0	0	66.0185	1	1	46.1809	38.4286
DATA	100	2	15	0	0	A_64_P075175	ENSRNOT00000044322	807.23	182.459	3.315797e+002	3.334721e+001	362	36	7.877642e+000	0	0	0	0	0	0	300.727	1	1	48.8603	36.8244
DATA	101	2	16	0	0	A_44_P472801	NM_173121	832.243	182.543	1.544476e+003	1.544881e+002	1412	37	8.261088e+000	0	0	0	0	0	0	1405.55	1	1	47.2035	37.686
DATA	102	2	17	0	0	A_42_P491486	NM_022533	858	182.545	2.789140e+003	2.789363e+002	2534	37	7.708199e+000	0	0	0	0	0	0	2546.66	1	1	55.8519	37.6588
DATA	103	2	18	0	0	A_43_P12736	NM_033299	883	182.786	6.334061e+001	7.243106e+000	121	38	8.355183e+000	0	0	0	0	0	0	58.0104	1	1	46.8651	38
DATA	104	2	19	0	0	A_64_P158790	A_64_P158790	908.582	182.573	2.011396e+004	2.011399e+003	18552	36	9.126423e+000	0	0	0	0	0	0	18474.1	1	1	57.5363	36.8
DATA	105	2	20	0	0	A_44_P229481	NM_001191077	933.955	183.394	1.724442e+002	1.759474e+001	221	36	8.528459e+000	0	0	0	0	0	0	158.819	1	1	45.4864	36.8261
DATA	106	2	21	0	0	A_64_P133836	ENSRNOT00000039319	959.5	182.648	1.083342e+001	3.649739e+000	71.5	39	9.343827e+000	0	0	0	0	0	0	10.0012	1	0	65	38.5
DATA	107	2	22	0	0	A_43_P13137	NM_130818	985	182.545	1.278560e+001	3.705132e+000	73.5	37	7.933784e+000	0	0	0	0	0	0	11.8296	1	0	65	36.8252
DATA	108	2	23	0	0	A_42_P586141	NM_017035	1010.08	182.833	1.451012e+002	1.491941e+001	197.5	38	7.917488e+000	0	0	0	0	0	0	134.519	1	1	46.8651	38.7014
DATA	109	2	24	0	0	A_44_P142850	NM_001106975	1035.61	182.931	3.181047e+001	4.703357e+000	93	36	6.833909e+000	0	0	0	0	0	0	29.543	1	1	65	36.3402
DATA	110	2	25	0	0	A_44_P1042504	NM_001044232	1060.7	182.9	1.140915e+002	1.192205e+001	164.5	38	7.903130e+000	0	0	0	0	0	0	106.118	1	1	47.2035	37.513
DATA	111	2	26	0	0	A_42_P476474	NM_001033926	1086.24	183	1.638234e+003	1.638598e+002	1583	40	9.191735e+000	0	0	0	0	0	0	1525.73	1	1	46.8651	39.9031
DATA	112	2	27	0	0	A_44_P480882	ENSRNOT00000035496	1112	183	1.107852e+001	3.624567e+000	73	38	7.614954e+000	0	0	0	0	0	0	10.3287	1	0	54.9904	38.7005
DATA	113	2	28	0	0	A_44_P1042696	NM_001106377	1137	182.797	4.198302e+003	4.198444e+002	3847	39	9.192704e+000	0	0	0	0	0	0	3917.15	1	1	46.8651	39.3825
DATA	114	2	29	0	0	A_64_P132576	NM_001012357	1162.56	182.972	7.572387e+002	7.580226e+001	751	38	8.538727e+000	0	0	0	0	0	0	706.931	1	1	48.2044	39.5373
DATA	115	2	30	0	0	A_42_P652357	NM_021868	1188.5	183	2.071796e+004	2.071799e+003	18943	38	9.128712e+000	0	0	0	0	0	0	19347.6	1	1	54.1152	38.7621
DATA	116	2	31	0	0	A_64_P134935	NM_001107976	1213.95	183.137	9.420729e+000	3.571673e+000	73	38	9.026142e+000	0	0	0	0	0	0	8.79815	1	0	46.8651	38.5025
DATA	117	2	32	0	0	A_64_P034019	NM_001107145	1239.16	183.114	2.771806e+001	4.422319e+000	88	39	9.000492e+000	0	0	0	0	0	0	25.8812	1	1	49.5074	39.767
DATA	118	2	33	0	0	A_64_P140634	A_64_P140634	1264.17	183	2.853137e+003	2.853346e+002	2709	40	7.958922e+000	0	0	0	0	0	0	2662.89	1	1	46.8651	40.2266
DATA	120	2	35	0	0	A_42_P746029	NM_144748	1314.92	182.901	4.155645e+001	5.403009e+000	101	39	9.747491e+000	0	0	0	0	0	0	38.7225	1	1	46.8651	40.6457
DATA	121	2	36	0	0	A_64_P009032	NM_001105801	1340.5	183	3.307298e+004	3.307300e+003	30533	40	8.340486e+000	0	0	0	0	0	0	30781.3	1	1	54.1152	39.6049
DATA	122	2	37	0	0	A_42_P764792	NM_001014036	1365.91	183.386	2.269829e+002	2.296077e+001	268.5	38	7.912170e+000	0	0	0	0	0	0	210.961	1	1	57.259	38.359
DATA	123	2	38	0	0	A_64_P029278	NM_001108687	1391.26	183.289	1.969304e+002	1.999600e+001	243	34	7.463768e+000	0	0	0	0	0	0	182.726	1	1	49.5074	35.0653
DATA	124	2	39	0	0	A_43_P12266	NM_022622	1416.58	183.427	3.683186e+001	5.063150e+000	98.5	39	8.976267e+000	0	0	0	0	0	0	34.1112	1	1	57.5363	38.6515
DATA	125	2	40	0	0	A_44_P204710	ENSRNOT00000049315	1442.09	183.386	1.983550e+001	4.006961e+000	80	39	8.003967e+000	0	0	0	0	0	0	18.3311	1	1	57.259	39.1497
DATA	126	2	41	0	0	A_64_P163837	NM_001013149	1467.23	183.329	1.078141e+002	1.133211e+001	166	38	7.911110e+000	0	0	0	0	0	0	99.4056	1	1	50.4627	38.657
DATA	127	2	42	0	0	A_64_P016202	XM_001080153	1492.58	183.427	3.512603e+000	3.498921e+000	65	39	9.685292e+000	0	0	0	0	0	0	0.427195	0	0	57.5363	40.2312
DATA	128	2	43	0	0	A_64_P137168	NM_053912	1518.42	183.427	5.917738e+003	5.917842e+002	5246	40	7.993195e+000	0	0	0	0	0	0	5426.87	1	1	57.5363	40.1929
DATA	129	2	44	0	0	A_42_P830598	XM_001063895	1543.27	183.418	5.735571e+002	5.746356e+001	551	39	8.036741e+000	0	0	0	0	0	0	524.442	1	1	50.7771	39.756
DATA	130	2	45	0	0	A_42_P525886	NM_001105716	1569	183.455	1.601190e+002	1.639645e+001	205	37	7.614007e+000	0	0	0	0	0	0	145.935	1	1	55.8519	37.2864
DATA	131	2	46	0	0	A_42_P836392	NM_134383	1594.09	183.086	3.764957e+003	3.765124e+002	3415	38	9.941345e+000	0	0	0	0	0	0	3419.86	1	1	46.8651	39.7831
DATA	132	2	47	0	0	A_44_P146783	NM_001001366	1619.7	183.159	3.746394e+001	5.164627e+000	97	39	8.560901e+000	0	0	0	0	0	0	33.9076	1	1	46.5243	38.886
DATA	133	2	48	0	0	A_44_P294675	NM_053687	1645.42	183.427	2.030191e+001	4.105577e+000	84	40	9.285817e+000	0	0	0	0	0	0	18.3052	1	1	57.5363	40.9076
DATA	134	2	49	0	0	A_64_P047137	NM_001001283	1670.37	183.562	1.689847e+001	3.960831e+000	80	38	8.408577e+000	0	0	0	0	0	0	15.1779	1	0	48.5334	38.1796
DATA	135	2	50	0	0	A_44_P170396	NM_017267	1696	183.455	2.394538e+001	4.321232e+000	85	38	8.113460e+000	0	0	0	0	0	0	21.4184	1	1	55.8519	38.2828
DATA	136	2	51	0	0	A_64_P077603	ENSRNOT00000037503	1721.27	183.453	7.305264e+001	8.149592e+000	129.5	38	8.266835e+000	0	0	0	0	0	0	65.0681	1	1	49.1849	39.1212
DATA	137	2	52	0	0	A_42_P648800	AA998304	1746.41	183.351	2.308801e+002	2.337133e+001	259	39.5	8.507598e+000	0	0	0	0	0	0	204.753	1	1	48.5334	38.8857
DATA	138	2	53	0	0	A_64_P143186	A_64_P143186	1772.28	183.654	5.071917e+001	6.245663e+000	109	43	8.964868e+000	0	0	0	0	0	0	44.7743	1	1	50.1463	43.2344
DATA	139	2	54	0	0	A_42_P622681	NM_001030020	1797.26	183.243	1.818246e+003	1.818615e+002	1604	40	8.270077e+000	0	0	0	1	0	0	1597.78	1	1	48.8603	41.2335
DATA	140	2	55	0	0	A_42_P506076	NM_019253	1822.57	183.392	1.442113e+004	1.442118e+003	12268.5	41	9.236403e+000	0	0	0	0	0	0	12613	1	1	49.1849	40.6329
DATA	141	2	56	0	0	A_64_P158975	NM_001109536	1848.5	183.5	1.169896e+002	1.226919e+001	165	42	1.005807e+001	0	0	0	0	0	0	101.818	1	1	57.5363	42.2158
DATA	142	2	57	0	0	A_42_P655425	NM_001106406	1873.29	183.494	4.365600e+002	4.381376e+001	429	39	8.723730e+000	0	0	0	1	0	0	378.129	1	1	49.8279	38.6794
DATA	143	2	58	0	0	A_44_P408520	NM_031569	1899.33	183.5	6.658978e+001	7.634308e+000	120	38	8.489520e+000	0	0	0	0	0	0	57.3834	1	1	57.5363	38.3365
DATA	144	2	59	0	0	A_64_P031259	NM_001002022	1924.29	183.62	1.441852e+002	1.489875e+001	183	38	7.645520e+000	0	0	0	0	0	0	123.639	1	1	50.4627	38.8627
DATA	145	2	60	0	0	A_43_P10227	NM_024397	1949.44	183.733	8.892965e+003	8.893045e+002	7329.5	41	8.034646e+000	0	0	0	0	0	0	7587.61	1	1	49.1849	40.4356
DATA	146	2	61	0	0	A_42_P542744	NM_001107544	1975.12	183.603	2.658533e+003	2.658803e+002	2235	38	9.978413e+000	0	0	0	1	0	0	2256.62	1	1	48.5334	39.6878
DATA	147	2	62	0	0	A_64_P052387	A_64_P052387	2000.58	183.573	9.029033e+001	9.799977e+000	136	38	9.550937e+000	0	0	0	0	0	0	76.2494	1	1	57.5363	39.0631
DATA	149	2	64	0	0	A_64_P064823	ENSRNOT00000050238	2051.24	183.634	2.045309e+002	2.081206e+001	239.5	39	8.505634e+000	0	0	0	0	0	0	170.985	1	1	47.5395	39.5665
DATA	150	2	65	0	0	A_42_P730292	NM_001004244	2076.55	183.795	1.875418e+003	1.875817e+002	1533	37	9.836616e+000	0	0	0	0	0	0	1560.02	1	1	50.1463	39.372
DATA	151	2	66	0	0	A_64_P052878	FM104687	2101.92	183.761	3.122476e+002	3.146579e+001	321.5	37	8.519854e+000	0	0	0	0	0	0	258.451	1	1	46.8651	37.8605
DATA	152	2	67	0	0	A_64_P157171	XM_001063008	2127.39	184.129	2.072615e+003	2.072983e+002	1786.5	37	7.831554e+000	0	0	0	0	0	0	1707.22	1	1	47.2035	37.4343
DATA	153	2	68	0	0	A_44_P693350	ENSRNOT00000030985	2153.09	183.614	3.940986e+000	3.927724e+000	66	37	8.827138e+000	0	0	0	0	0	0	1.13354	0	0	65	37.9644
DATA	154	2	69	0	0	A_64_P090168	NM_001000720	2178.5	183.648	2.958213e+001	4.929822e+000	88.5	38	8.430393e+000	0	0	0	0	0	0	24.1354	1	1	65	38.5455
DATA	155	2	70	0	0	A_42_P726392	NM_001106353	2203.53	183.625	8.006076e+002	8.015870e+001	683	38	8.140778e+000	0	0	0	0	0	0	650.294	1	1	50.4627	39.3015
DATA	156	2	71	0	0	A_64_P015727	FQ218047	2229	183.797	2.411162e+003	2.411490e+002	2018	38	7.838828e+000	0	0	0	0	0	0	1949.95	1	1	46.8651	38.4369
DATA	157	2	72	0	0	A_44_P897023	NM_001008364	2254.28	183.905	5.252994e+002	5.268164e+001	480	37	7.567630e+000	0	0	0	0	0	0	423.059	1	1	48.8603	37.3125
DATA	158	2	73	0	0	A_44_P104776	NM_001001425	2280	184	5.284612e+001	6.634507e+000	105	38	7.627438e+000	0	0	0	0	0	0	42.3898	1	1	54.9904	38.3869
DATA	159	2	74	0	0	A_64_P142521	A_64_P142521	2305.5	184	1.023429e+001	4.154349e+000	68.5	38	9.197628e+000	0	0	0	0	0	0	8.17844	1	0	54.1152	38.3102
DATA	160	2	75	66	1	DarkCorner	DarkCorner	2330.32	183.938	4.056317e+000	4.040160e+000	59	38	8.862066e+000	0	0	0	0	0	0	-2.73874	0	0	45.4864	39.4721
DATA	161	2	76	66	1	DarkCorner	DarkCorner	2356.5	184	4.069833e+000	4.053622e+000	60	40.5	8.212773e+000	0	0	0	0	0	0	-2.56124	0	0	54.1152	40.24
DATA	162	2	77	66	1	DarkCorner	DarkCorner	2381.41	183.94	4.081600e+000	4.065343e+000	57	41	8.360556e+000	0	0	0	0	0	0	-4.28767	0	0	49.8279	41.0332
DATA	163	2	78	66	1	DarkCorner	DarkCorner	2407	184	4.092361e+000	4.076061e+000	62	39	8.356653e+000	0	0	0	0	0	0	-1.18145	0	0	54.9904	38.8
DATA	164	2	79	66	1	DarkCorner	DarkCorner	2432.25	184.426	4.101437e+000	4.085101e+000	57	40	8.984535e+000	0	0	0	0	0	0	-4.84786	0	0	46.1809	40.6919
DATA	165	2	80	66	1	DarkCorner	DarkCorner	2457.78	184.435	4.109295e+000	4.092928e+000	59	39	8.812339e+000	0	0	0	0	0	0	-2.35945	0	0	39.0882	39.1185
DATA	166	2	81	66	1	DarkCorner	DarkCorner	2483.49	184.267	4.115640e+000	4.099247e+000	59	39	9.358475e+000	0	0	0	0	0	0	-4.07324	0	0	48.5334	40.8413
DATA	167	2	82	66	1	DarkCorner	DarkCorner	2508.5	184	4.120159e+000	4.103748e+000	58	39	8.177329e+000	0	0	0	0	0	0	-2.8945	0	0	54.1152	39.5896
DATA	168	2	83	66	1	DarkCorner	DarkCorner	2533.91	184.065	4.122759e+000	4.106338e+000	60	38	8.783241e+000	0	0	0	0	0	0	-1.90601	0	0	54.4085	39.52
DATA	169	2	84	66	1	DarkCorner	DarkCorner	2559.5	184.352	4.123284e+000	4.106860e+000	58	39	8.990153e+000	0	0	0	0	0	0	-2.46589	0	0	65	39.802
DATA	170	2	85	260	1	GE_BrightCorner	GE_BrightCorner	2584.44	183.973	2.783302e+004	2.783305e+003	21576	37	8.123151e+000	0	0	0	0	0	0	21812.1	1	1	48.5334	37.1483
DATA	171	3	1	66	1	DarkCorner	DarkCorner	439	189.545	9.110513e+000	3.888524e+000	69	36	7.928473e+000	0	0	0	0	0	0	7.75422	1	0	55.8519	37.1
DATA	172	3	2	66	1	DarkCorner	DarkCorner	464.418	189.573	3.776734e+000	3.771563e+000	62	39	8.729735e+000	0	0	0	0	0	0	2.3326	0	0	65	38.9434
DATA	173	3	3	66	1	DarkCorner	DarkCorner	489.656	189.753	3.758231e+000	3.748425e+000	63	35	8.226869e+000	0	0	0	0	0	0	1.69051	0	0	53.8203	36.25
DATA	174	3	4	66	1	DarkCorner	DarkCorner	515.013	189.861	3.739896e+000	3.725000e+000	60.5	35.5	6.949150e+000	0	0	0	0	0	0	-0.0252866	0	0	49.8279	35.9138
DATA	175	3	5	66	1	DarkCorner	DarkCorner	540.882	189.724	3.721609e+000	3.706867e+000	59.5	36	5.570782e+000	0	0	0	0	0	0	0.212427	0	0	49.1849	34.8167
DATA	176	3	6	66	1	DarkCorner	DarkCorner	566.663	189.791	3.703571e+000	3.688819e+000	59	36.5	6.375535e+000	0	0	0	0	0	0	-2.78575	0	0	51.7088	36.3519
DATA	177	3	7	66	1	DarkCorner	DarkCorner	590.853	190.16	3.686802e+000	3.673073e+000	59.5	35	6.589447e+000	0	0	0	0	0	0	0.734329	0	0	47.8731	35.26
DATA	178	3	8	66	1	DarkCorner	DarkCorner	616.481	190.195	3.669644e+000	3.655027e+000	59	36	8.663879e+000	0	0	0	0	0	0	-2.65163	0	0	49.1849	36.7826
DATA	179	3	9	66	1	DarkCorner	DarkCorner	642.209	190.149	3.652911e+000	3.638361e+000	56	35	6.901427e+000	0	0	0	0	0	0	-4.10182	0	0	46.1809	35.3684
DATA	180	3	10	66	1	DarkCorner	DarkCorner	667.5	189.648	3.637171e+000	3.622684e+000	56	36	7.130802e+000	0	0	0	0	0	0	-4.92715	0	0	57.5363	36.1887
DATA	181	3	11	0	0	A_64_P269465	ENSRNOT00000055742	693	189.681	6.715890e+000	3.669098e+000	67.5	35	9.015480e+000	0	0	0	0	0	0	5.99052	1	0	58.0869	36.1379
DATA	182	3	12	0	0	A_64_P140776	NM_001114502	718.09	190.104	3.547523e+003	3.547705e+002	3148	37	6.339529e+000	0	0	0	0	0	0	3177.54	1	1	46.8651	37.3469
DATA	183	3	13	0	0	A_42_P662683	NM_001108855	743.347	189.88	8.062421e+003	8.062500e+002	7075	37.5	7.538580e+000	0	0	0	0	0	0	7250.2	1	1	48.8603	37.6667
DATA	184	3	14	0	0	A_44_P308687	NM_181389	769.028	189.958	1.028947e+002	1.088923e+001	153.5	39.5	9.007933e+000	0	0	0	0	0	0	92.891	1	1	46.8651	40.8
DATA	185	3	15	0	0	A_42_P705255	NM_078622	794.437	189.972	7.949942e+001	8.706918e+000	132	36	9.628381e+000	0	0	0	0	0	0	72.0355	1	1	48.2044	37.78
DATA	186	3	16	0	0	A_44_P142472	NM_001106072	819.562	189.973	6.467256e+003	6.467353e+002	5816	40	8.689220e+000	0	0	0	0	0	0	5880.47	1	1	48.5334	39.551
DATA	187	3	17	0	0	A_64_P015946	NM_001009720	845.042	190.141	6.969502e+002	6.978419e+001	681	37	8.143798e+000	0	0	0	0	0	0	635.848	1	1	46.8651	37.5926
DATA	188	3	18	0	0	A_64_P118698	ENSRNOT00000050943	870.5	190	4.077546e+001	5.383896e+000	96.5	40	7.757607e+000	0	0	0	0	0	0	37.3174	1	1	54.1152	39.6909
DATA	189	3	19	0	0	A_42_P705302	NM_001107361	895.904	190.178	4.954546e+003	4.954670e+002	4517.5	36	1.020518e+001	0	0	0	0	0	0	4547.81	1	1	47.5395	38.7
DATA	190	3	20	0	0	A_64_P097547	NM_001100528	921.311	190.162	2.993953e+001	4.602574e+000	90	36.5	1.009094e+001	0	0	0	0	0	0	27.5569	1	1	48.5334	38.9444
DATA	191	3	21	0	0	A_42_P815485	NM_001013908	946.437	189.972	5.229124e+003	5.229241e+002	4707	38	7.570544e+000	0	0	0	0	0	0	4824.94	1	1	48.2044	38.7778
DATA	192	3	22	0	0	A_42_P526728	ENSRNOT00000060758	971.696	190.029	9.729149e+002	9.735368e+001	943	39	6.444514e+000	0	0	0	0	0	0	899.784	1	1	46.1809	38.7059
DATA	193	3	23	0	0	A_42_P692317	NM_001107565	997.415	190.073	5.531159e+002	5.542044e+001	570	38	9.698635e+000	0	0	0	0	0	0	512.624	1	1	49.8279	39.2353
DATA	194	3	24	0	0	A_44_P383949	NM_175593	1023.09	190.386	2.881898e+001	4.506878e+000	88	38	6.208979e+000	0	0	0	0	0	0	26.7602	1	1	57.259	38.7083
DATA	195	3	25	0	0	A_42_P589570	NM_001014105	1048.5	190.352	1.370930e+002	1.413905e+001	190.5	37	9.574113e+000	0	0	0	0	0	0	127.506	1	1	57.5363	38.4667
DATA	196	3	26	0	0	A_64_P012384	NM_001039338	1073.63	190.404	8.047429e+001	8.757623e+000	138.5	37.5	7.849651e+000	0	0	0	0	0	0	74.9496	1	1	57.8122	37.5
DATA	197	3	27	0	0	A_64_P088612	NM_053871	1098.85	190.164	2.437627e+003	2.437871e+002	2251	39	7.493572e+000	0	0	0	0	0	0	2272.83	1	1	47.5395	38.7581
DATA	198	3	28	0	0	A_42_P668072	NM_013130	1124.29	190.301	2.471139e+002	2.495073e+001	292	38	8.125157e+000	0	0	0	0	0	0	230.62	1	1	48.2044	38.0182
DATA	199	3	29	0	0	A_44_P624451	NM_001134605	1150	190.455	4.643325e+001	5.781897e+000	105	38.5	9.045693e+000	0	0	0	0	0	0	43.3637	1	1	55.8519	39
DATA	200	3	30	0	0	A_64_P118502	A_64_P118502	1175.42	190.427	2.602776e+002	2.625460e+001	311	40	9.051741e+000	0	0	0	0	0	0	243.173	1	1	57.5363	40.6545
DATA	201	3	31	0	0	A_43_P15761	NM_031608	1200.81	190.218	1.305116e+002	1.349775e+001	182.5	39	7.994011e+000	0	0	0	0	0	0	121.953	1	1	49.8279	38.566
DATA	202	3	32	0	0	A_42_P667696	NM_001191800	1226.11	190.352	1.605730e+003	1.606100e+002	1528.5	42	1.177866e+001	0	0	0	0	0	0	1500.34	1	1	47.8731	43
DATA	203	3	33	0	0	A_44_P899121	NM_001079941	1251.16	190.118	2.070777e+003	2.071064e+002	1929.5	39	6.751331e+000	0	0	0	0	0	0	1934.21	1	1	46.5243	38.7091
DATA	204	3	34	0	0	A_42_P642757	NM_031235	1276.81	190.389	2.867571e+003	2.867778e+002	2644	41.5	8.552493e+000	0	0	0	0	0	0	2676.98	1	1	47.8731	42.9821
DATA	205	3	35	0	0	A_64_P066694	NM_001033898	1301.95	190.565	4.305369e+001	5.516705e+000	100	42	7.077318e+000	0	0	0	0	0	0	40.1603	1	1	44.0646	42.4898
DATA	206	3	36	0	0	A_42_P699201	TC594545	1327.57	190.418	2.205951e+001	4.097525e+000	83	42	1.074751e+001	0	0	0	0	0	0	20.5549	1	1	46.5243	43.3559
DATA	207	3	37	0	0	A_42_P591944	NM_172093	1353.33	190.5	1.027516e+002	1.084130e+001	160.5	39	7.927960e+000	0	0	0	0	0	0	95.6173	1	1	57.5363	38.451
DATA	208	3	38	0	0	A_44_P115293	NM_001108294	1378.5	190.5	4.483126e+001	5.664795e+000	105	38	6.785163e+000	0	0	0	0	0	0	41.6548	1	1	57.5363	36.9608
DATA	209	3	39	1028	1	(+)E1A_r60_a107	E1A_r60_a107	1404	190.455	1.200776e+001	3.671007e+000	74	38.5	8.367448e+000	0	0	0	0	0	0	11.137	1	0	55.8519	39.1667
DATA	210	3	40	0	0	A_44_P194531	NM_001007742	1429.5	190.5	1.345653e+002	1.389825e+001	189.5	37	9.549014e+000	0	0	0	0	0	0	124.556	1	1	57.5363	37.9388
DATA	211	3	41	0	0	A_43_P20016	NM_001107377	1454.5	190.303	8.649569e+001	9.324792e+000	143	41	8.402778e+000	0	0	0	0	0	0	79.8848	1	1	49.1849	42.3208
DATA	212	3	42	0	0	A_64_P105550	A_64_P105550	1480.03	190.364	1.129678e+002	1.182429e+001	171	36	7.819706e+000	0	0	0	0	0	0	104.076	1	1	45.4864	37.6111
DATA	213	3	43	0	0	A_42_P791872	NM_001135174	1505.21	190.603	4.673940e+003	4.674071e+002	4189.5	42.5	9.302585e+000	0	0	0	0	0	0	4294.73	1	1	50.1463	42.8269
DATA	214	3	44	0	0	A_42_P499273	NM_001012148	1530.55	190.671	1.217825e+003	1.218332e+002	1088.5	39	7.011814e+000	0	0	0	0	0	0	1115.81	1	1	49.5074	39.1731
DATA	215	3	45	0	0	A_64_P021960	NM_001109493	1557.09	190.705	2.602690e+002	2.626426e+001	291.5	40	7.177150e+000	0	0	0	0	0	0	237.695	1	1	49.8279	40.2951
DATA	216	3	46	0	0	A_64_P083725	A_64_P083725	1581.58	190.573	7.681955e+004	7.681956e+003	69974	41.5	1.130983e+001	0	0	0	0	0	0	69933.5	1	1	57.5363	42.119
DATA	217	3	47	0	0	A_42_P524536	NM_012698	1606.81	190.533	1.821963e+002	1.856160e+001	218	39.5	8.094154e+000	0	0	0	0	0	0	165.291	1	1	49.5074	39.7045
DATA	218	3	48	0	0	A_64_P151675	NM_175755	1632.4	190.56	4.896971e+001	6.054082e+000	109.5	39.5	7.870601e+000	0	0	0	0	0	0	44.2621	1	1	49.5074	40.3958
DATA	219	3	49	0	0	A_64_P146914	A_64_P146914	1657.69	190.662	2.139020e+003	2.139319e+002	1955.5	38	9.018325e+000	0	0	0	0	0	0	1926.02	1	1	48.5334	39.6981
DATA	220	3	50	0	0	A_64_P115065	NM_001109631	1683.42	190.573	9.977831e+000	3.724059e+000	74.5	40	8.603114e+000	0	0	0	0	0	0	8.94779	1	0	57.5363	40.4231
DATA	221	3	51	0	0	A_42_P468771	NM_001107362	1708.32	190.773	2.508412e+003	2.508670e+002	2196	39	7.085626e+000	0	0	0	0	0	0	2240.33	1	1	49.1849	40.4878
DATA	222	3	52	0	0	A_44_P226461	NM_053798	1733.66	190.878	8.673418e+002	8.680961e+001	808	43	8.896238e+000	0	0	0	0	0	0	771.329	1	1	48.8603	40.4103
DATA	223	3	53	0	0	A_64_P009440	NM_001109313	1759.35	190.282	1.684464e+001	4.005855e+000	80	38	7.561731e+000	0	0	0	0	0	0	14.9121	1	0	50.1463	37.7705
DATA	224	3	54	0	0	A_44_P282433	NM_033230	1784.63	190.63	4.391193e+002	4.406345e+001	454	41	8.247559e+000	0	0	0	0	0	0	386.987	1	1	48.2044	41.4222
DATA	225	3	55	0	0	A_42_P461003	NM_001044283	1810	190.583	7.820913e+003	7.820999e+002	6799	43	7.529550e+000	0	0	0	0	0	0	6860.25	1	1	48.5334	42.4706
DATA	226	3	56	0	1	ETG10_236652	ETG10_236652	1835.58	190.573	1.713846e+001	4.064757e+000	81	41	1.024962e+001	0	0	0	0	0	0	14.9611	1	0	57.5363	41.7258
DATA	227	3	57	0	0	A_42_P529780	NM_138855	1860.88	190.571	4.847779e+002	4.861907e+001	470	41	1.004555e+001	0	0	0	0	0	0	421.141	1	1	51.7088	42
DATA	228	3	58	0	0	A_42_P492976	NM_001126099	1886.09	190.914	2.905637e+002	2.929376e+001	305	38	8.535141e+000	0	0	0	0	0	0	251.194	1	1	46.8651	38.339
DATA	229	3	59	0	0	A_42_P533865	NM_001127650	1911.51	191.356	1.908101e+001	4.198919e+000	78	42	1.010585e+001	0	0	0	0	0	0	16.4139	1	1	47.8731	42.0889
DATA	230	3	60	0	0	A_64_P026399	NM_001007626	1937	191.236	5.292932e+002	5.306266e+001	517	41.5	8.238411e+000	0	0	0	0	0	0	453.006	1	1	46.8651	41.3269
DATA	231	3	61	0	0	A_64_P152543	XM_221353	1962.37	190.866	8.846733e+003	8.846813e+002	7586	38.5	8.580170e+000	0	0	0	0	0	0	7533.12	1	1	45.835	39.7391
DATA	232	3	62	0	0	A_44_P203195	NM_053585	1987.72	190.905	1.246081e+003	1.246659e+002	1124	38	1.142731e+001	0	0	0	0	0	0	1055.68	1	1	48.8603	40.4286
DATA	233	3	63	0	0	A_42_P490612	NM_001108262	2013.24	191	5.013471e+003	5.013616e+002	4102	40	1.021976e+001	0	0	0	0	0	0	4225.8	1	1	46.8651	41.5
DATA	234	3	64	0	0	A_44_P457548	NM_001103351	2038.63	190.904	6.154253e+001	7.252232e+000	116.5	39	8.619210e+000	0	0	0	0	0	0	51.6109	1	1	48.5334	39.0833
DATA	235	3	65	0	0	A_42_P755665	NM_001013154	2064.17	191	9.265789e+002	9.273809e+001	822	38	1.078568e+001	0	0	0	0	0	0	773.131	1	1	46.8651	41.5283
DATA	236	3	66	0	0	A_42_P781999	NM_001106378	2089.24	191	1.459229e+004	1.459234e+003	11790	39	9.442155e+000	0	0	0	0	0	0	12116	1	1	46.8651	40.8136
DATA	237	3	67	0	0	A_44_P100289	ENSRNOT00000049514	2115.14	191.096	6.410823e+001	7.501070e+000	115.5	36	6.515094e+000	0	0	0	0	0	0	52.9637	1	1	46.8651	36.7705
DATA	238	3	68	0	0	A_42_P629599	ENSRNOT00000023101	2140.13	191.254	2.685815e+002	2.714169e+001	274	38	1.007146e+001	0	0	0	1	0	0	220.845	1	1	47.2035	38.7458
DATA	239	3	69	0	0	A_44_P192083	NM_001047088	2166.17	190.879	3.486103e+001	5.254914e+000	97	39	9.539239e+000	0	0	0	0	0	0	28.5259	1	1	46.1809	39.9464
DATA	240	3	70	0	0	A_42_P498066	NM_031136	2191.39	191.069	6.699554e+004	6.699555e+003	53748	40	9.124766e+000	0	0	0	0	0	0	54572.9	1	1	53.8203	39.9767
DATA	241	3	71	0	0	A_42_P519910	NM_001106292	2216.23	190.727	1.267986e+004	1.267993e+003	10289	43.5	9.023885e+000	0	0	0	0	0	0	10283.7	1	1	45.4864	42.6
DATA	242	3	72	0	0	A_42_P657538	NM_001008362	2241.69	191.338	1.605090e+003	1.605584e+002	1305.5	38	7.979055e+000	0	0	0	0	0	0	1296.29	1	1	48.5334	39.0364
DATA	243	3	73	0	0	A_64_P030630	NM_001109610	2267.09	191.28	2.579618e+003	2.579928e+002	2130.5	38.5	8.882074e+000	0	0	0	0	0	0	2074.86	1	1	48.8603	38.4167
DATA	244	3	74	0	0	A_44_P126366	NM_001017456	2292.14	191.608	4.648573e+001	6.142676e+000	101	41	8.215195e+000	0	0	0	0	0	0	37.2489	1	1	48.5334	40.0484
DATA	245	3	75	0	0	A_43_P15627	ENSRNOT00000067029	2318.42	191.427	2.663234e+001	4.830936e+000	84	38	5.614455e+000	0	0	0	0	0	0	21.2602	1	1	57.5363	37.7551
DATA	246	3	76	0	0	A_42_P754784	CB328432	2343.2	191.28	4.914016e+003	4.914182e+002	3720	39.5	9.464951e+000	0	0	0	0	0	0	3909.89	1	1	49.1849	40.08
DATA	247	3	77	66	1	DarkCorner	DarkCorner	2369	191.455	4.072640e+000	4.056418e+000	57.5	39	8.927995e+000	0	0	0	0	0	0	-3.40644	0	0	55.8519	40
DATA	248	3	78	66	1	DarkCorner	DarkCorner	2394.31	191.708	4.083784e+000	4.067518e+000	63	38	8.582588e+000	0	0	0	0	0	0	-0.90441	0	0	48.2044	39.18
DATA	249	3	79	66	1	DarkCorner	DarkCorner	2419.22	191.507	4.093669e+000	4.077363e+000	59	39	8.969909e+000	0	0	0	0	0	0	-2.51378	0	0	48.5334	41.2
DATA	250	3	80	66	1	DarkCorner	DarkCorner	2444.66	191.34	4.102320e+000	4.085980e+000	59	39	8.604567e+000	0	0	0	0	0	0	-2.90829	0	0	54.4085	39.4068
DATA	251	3	81	66	1	DarkCorner	DarkCorner	2469.99	191.364	4.109299e+000	4.092931e+000	58.5	40	9.101111e+000	0	0	0	0	0	0	-3.51861	0	0	49.1849	40.3167
DATA	252	3	82	66	1	DarkCorner	DarkCorner	2495.33	191.72	4.114466e+000	4.098078e+000	57	41	8.166481e+000	0	0	0	0	0	0	-4.94646	0	0	51.0895	42.7119
DATA	253	3	83	66	1	DarkCorner	DarkCorner	2521.42	191.427	4.118236e+000	4.101833e+000	57	39	7.641299e+000	0	0	0	0	0	0	-4.35637	0	0	57.5363	39.8367
DATA	254	3	84	66	1	DarkCorner	DarkCorner	2546.58	191.427	4.119837e+000	4.103427e+000	59	40	8.971760e+000	0	0	0	0	0	0	-3.95535	0	0	65	41.1579
DATA	255	3	85	66	1	DarkCorner	DarkCorner	2572.11	191.5	4.119398e+000	4.103361e+000	60	40	1.028109e+001	0	0	0	0	0	0	0.433122	0	0	56.9804	41.4576
DATA	256	4	1	66	1	DarkCorner	DarkCorner	451.708	196.892	3.780792e+000	3.776637e+000	63	40	8.149212e+000	0	0	0	0	0	0	2.45025	0	0	45.835	41.6522
DATA	257	4	2	66	1	DarkCorner	DarkCorner	477.392	197.069	3.762098e+000	3.747113e+000	56	41	3.756898e+000	0	0	0	0	0	0	-4.013	0	0	53.8203	41.2857
DATA	258	4	3	66	1	DarkCorner	DarkCorner	502.449	196.768	3.744343e+000	3.731691e+000	62	36	7.228695e+000	0	0	0	0	0	0	1.12074	0	0	46.8651	36.0625
DATA	259	4	4	66	1	DarkCorner	DarkCorner	527.727	197.442	3.726009e+000	3.711168e+000	59	36	6.795126e+000	0	0	0	0	0	0	-0.414039	0	0	48.5334	36.9111
DATA	260	4	5	66	1	DarkCorner	DarkCorner	553.031	197.047	3.708613e+000	3.693841e+000	54	36	5.751180e+000	0	0	0	0	0	0	-3.97841	0	0	46.1809	36.4048
DATA	261	4	6	66	1	DarkCorner	DarkCorner	577.939	197.427	3.691327e+000	3.676624e+000	56.5	39	5.752061e+000	0	0	0	0	0	0	-4.72319	0	0	51.0895	38.5
DATA	262	4	7	66	1	DarkCorner	DarkCorner	604.088	197.386	3.673826e+000	3.659193e+000	58	39	7.455946e+000	0	0	0	0	0	0	-2.52613	0	0	57.259	38.6552
DATA	263	4	8	66	1	DarkCorner	DarkCorner	629.167	197.218	3.657518e+000	3.642950e+000	59	38	8.427671e+000	0	0	0	0	0	0	-3.46894	0	0	49.5074	38.0256
DATA	264	4	9	66	1	DarkCorner	DarkCorner	654.701	197.724	3.641005e+000	3.626503e+000	59	34	6.647795e+000	0	0	0	0	0	0	-1.91178	0	0	52.3208	34.4545
DATA	265	4	10	0	0	A_44_P807031	NM_001108921	680.216	197.176	3.298300e+003	3.298497e+002	2992.5	36	8.441751e+000	0	0	0	0	0	0	2938.8	1	1	48.2044	37
DATA	266	4	11	0	0	A_64_P025813	NM_001009379	705.582	197.427	3.610303e+000	3.595923e+000	62	36.5	6.659623e+000	0	0	0	0	0	0	-0.259154	0	0	57.5363	36.1667
DATA	267	4	12	0	0	A_64_P130551	XM_001081846	731	197.455	7.688989e+000	3.662987e+000	69	36	7.610673e+000	0	0	0	0	0	0	6.9078	1	0	55.8519	36.1212
DATA	268	4	13	0	0	A_42_P715449	NM_001033709	756.418	197.427	9.510958e+002	9.517647e+001	901	36	9.383527e+000	0	0	0	1	0	0	857.802	1	1	57.5363	39.1333
DATA	269	4	14	0	0	A_42_P727584	NM_031622	781.348	197.015	2.294451e+003	2.294727e+002	2042	39	6.987370e+000	0	0	0	0	0	0	2076.89	1	1	45.4864	39.36
DATA	270	4	15	0	0	A_42_P600642	NM_001008386	807.418	197.427	1.806109e+002	1.840501e+001	230	35	7.875817e+000	0	0	0	0	0	0	164.094	1	1	57.5363	35.5185
DATA	271	4	16	0	0	A_42_P669103	NM_001108329	832.338	197.31	4.988091e+002	5.000564e+001	506	41	8.147188e+000	0	0	0	0	0	0	454.699	1	1	48.2044	40.72
DATA	272	4	17	0	0	A_44_P715330	NM_001024966	857.85	197.762	3.063761e+002	3.083894e+001	332	38	7.126469e+000	0	0	0	0	0	0	280.199	1	1	50.4627	38.5143
DATA	273	4	18	0	0	A_64_P083185	NM_001107199	883.189	197.581	4.737424e+002	4.750391e+001	485	43.5	1.064292e+001	0	0	0	0	0	0	434.563	1	1	49.1849	41.6
DATA	274	4	19	0	0	A_64_P037313	ENSRNOT00000030164	908.667	197.5	1.259211e+001	3.717496e+000	73.5	38	9.791385e+000	0	0	0	0	0	0	11.5833	1	0	57.5363	42.0606
DATA	275	4	20	0	0	A_44_P321009	NM_012540	934.25	197.368	5.655800e+000	3.534156e+000	64	36	9.437123e+000	0	0	0	0	0	0	5.2163	1	0	46.5243	40.1739
DATA	276	4	21	0	0	A_42_P700753	FQ212883	959.471	197.259	1.121193e+003	1.121734e+002	1097	41	6.325346e+000	0	0	0	0	0	0	1036.52	1	1	51.7088	41.48
DATA	277	4	22	0	0	A_44_P775974	NM_001024363	985.1	197.4	3.486565e+000	3.478033e+000	63	40	8.167775e+000	0	0	0	0	0	0	1.78758	0	0	39.8942	40.1538
DATA	278	4	23	0	0	A_44_P503868	A_44_P503868	1010.04	197.304	2.241959e+003	2.242227e+002	2102	38	6.715310e+000	0	0	0	0	0	0	2081.19	1	1	46.1809	39.8462
DATA	279	4	24	0	0	A_64_P122541	A_64_P122541	1035.63	197.284	6.417129e+001	7.290505e+000	123.5	37	5.679956e+000	0	0	0	0	0	0	59.6732	1	1	46.1809	39.1905
DATA	280	4	25	0	0	A_64_P080967	NM_001033890	1060.68	197.395	6.682132e+003	6.682221e+002	6149	41	7.697835e+000	0	0	0	0	0	0	6222.97	1	1	49.5074	40.44
DATA	281	4	26	0	0	A_44_P1056309	NM_001105912	1086.5	197.5	1.699218e+001	3.846187e+000	77	42	5.909185e+000	0	0	0	0	0	0	15.8449	1	0	57.5363	41.0385
DATA	282	4	27	0	0	A_44_P199514	NM_001005564	1112	197.545	8.596086e+002	8.602994e+001	857.5	37	8.366600e+000	0	0	0	0	0	0	802.39	1	1	65	38
DATA	283	4	28	0	0	A_64_P097952	NM_001134962	1137.42	197.573	2.981164e+001	4.555268e+000	92	42	1.044580e+001	0	0	0	0	0	0	27.8488	1	1	65	43.8718
DATA	284	4	29	0	0	A_42_P813939	NM_001108741	1162.34	197.31	1.419255e+003	1.419672e+002	1383.5	38	1.012209e+001	0	0	0	0	0	0	1326.47	1	1	48.2044	39.96
DATA	285	4	30	0	0	A_64_P006423	NM_012584	1188.23	197.547	5.850006e+001	6.787234e+000	116	41	7.596355e+000	0	0	0	0	0	0	54.6925	1	1	49.1849	41.7692
DATA	286	4	31	0	0	A_42_P670614	NM_001107097	1213.32	197.533	3.424848e+003	3.425021e+002	3149	39.5	9.978152e+000	0	0	0	0	0	0	3202.06	1	1	49.1849	40.2813
DATA	287	4	32	0	0	A_64_P084088	NM_001011954	1239	197.545	1.599074e+002	1.635701e+001	200.5	43.5	8.883146e+000	0	0	0	0	0	0	149.474	1	1	65	42.8438
DATA	288	4	33	0	0	A_64_P025643	XM_001073566	1264.34	197.724	3.372104e+002	3.389642e+001	384	40	5.650007e+000	0	0	0	0	0	0	315.069	1	1	49.8279	40.4516
DATA	289	4	34	0	0	A_42_P719607	NM_153721	1289.58	197.573	2.289911e+001	4.137512e+000	84	39.5	4.383765e+000	0	0	0	0	0	0	21.3804	1	1	57.5363	39.5
DATA	290	4	35	0	0	A_42_P843603	NM_052800	1315.2	197.972	2.153272e+002	2.180723e+001	264.5	43	9.336399e+000	0	0	0	0	0	0	200.861	1	1	46.8651	44.1563
DATA	291	4	36	0	0	A_44_P234129	NM_001135802	1340.36	197.71	9.251925e+001	9.875416e+000	148.5	42	9.988047e+000	0	0	0	0	0	0	86.2006	1	1	46.8651	43.2414
DATA	292	4	37	0	0	A_42_P701161	NM_001033666	1365.5	197.5	4.445236e+003	4.445370e+002	4041.5	39.5	5.508228e+000	0	0	0	0	0	0	4135.75	1	1	49.1849	38.9167
DATA	293	4	38	0	0	A_44_P1017335	NM_001108607	1390.81	197.662	4.974167e+003	4.974288e+002	4554	39	6.613578e+000	0	0	0	0	0	0	4620.26	1	1	46.5243	37.5357
DATA	294	4	39	0	0	A_44_P900209	CV121387	1416.49	197.479	3.919604e+001	5.235335e+000	101	37.5	1.007467e+001	0	0	0	0	0	0	36.3372	1	1	49.1849	38.7188
DATA	295	4	40	0	0	A_64_P037517	ENSRNOT00000014921	1442.09	197.935	5.912678e+000	3.527883e+000	69	40	8.898286e+000	0	0	0	0	0	0	5.46987	1	0	65	41.1111
DATA	296	4	41	0	0	A_64_P128528	NM_001106013	1467.09	197.896	1.211408e+003	1.211910e+002	1193	40.5	8.934751e+000	0	0	0	0	0	0	1118.09	1	1	46.8651	41.4412
DATA	297	4	42	0	0	A_64_P378865	NM_001000706	1492.52	198.096	7.378779e+001	8.164630e+000	131	43	9.079343e+000	0	0	0	0	0	0	67.93	1	1	48.5334	43.2188
DATA	298	4	43	0	0	A_42_P553960	NM_001107831	1518	197.797	4.699538e+003	4.699668e+002	4295	40	8.601180e+000	0	0	0	0	0	0	4314.3	1	1	46.8651	41.8621
DATA	299	4	44	0	0	A_42_P717654	XM_001063683	1543.28	197.905	2.817856e+003	2.818075e+002	2499	40	7.755630e+000	0	0	0	0	0	0	2579.2	1	1	48.8603	40.4615
DATA	300	4	45	0	0	A_44_P295118	NM_001107228	1569	198	2.097088e+002	2.126534e+001	250	39	7.939870e+000	0	0	0	0	0	0	191.329	1	1	54.9904	39.1923
DATA	301	4	46	0	0	A_64_P049057	ENSRNOT00000014519	1594.14	197.789	6.167182e+002	6.177325e+001	608	39.5	6.924078e+000	0	0	0	0	0	0	560.775	1	1	47.2035	39
DATA	302	4	47	0	0	A_42_P810287	NM_001004107	1619.43	197.821	8.279935e+002	8.287546e+001	802	39	5.868844e+000	0	0	0	0	0	0	750.212	1	1	46.5243	39.88
DATA	303	4	48	0	0	A_42_P702729	NM_001107557	1644.84	197.897	1.170080e+003	1.170622e+002	1100	39	6.987985e+000	0	0	0	0	0	0	1056.2	1	1	46.5243	39.8571
DATA	304	4	49	0	0	A_42_P811084	NM_173147	1670.24	198.014	1.340058e+003	1.340536e+002	1247	43	8.402253e+000	0	0	0	0	0	0	1204.91	1	1	46.8651	42.2581
DATA	305	4	50	0	0	A_64_P151473	A_64_P151473	1695.7	198.1	2.216369e+004	2.216372e+003	19990.5	42	9.290434e+000	0	0	0	0	0	0	19847.2	1	1	47.2035	42.3571
DATA	306	4	51	0	0	A_44_P134634	ENSRNOT00000000260	1721.37	198.206	8.685483e+001	9.405230e+000	141	42	7.714916e+000	0	0	0	0	0	0	77.4456	1	1	46.8651	41.7083
DATA	307	4	52	0	0	A_44_P178479	NM_001135039	1746.28	198.095	5.733865e+002	5.745306e+001	576	40.5	7.221001e+000	0	0	0	0	0	0	509.077	1	1	48.8603	40.0714
DATA	308	4	53	0	0	A_64_P317400	ENSRNOT00000068382	1772.47	197.809	1.530996e+001	3.949704e+000	78	37.5	7.183443e+000	0	0	0	0	0	0	13.5296	1	0	46.8651	38.25
DATA	309	4	54	0	0	A_42_P781735	NM_053319	1797.5	198.352	5.993819e+004	5.993820e+003	52736	43.5	9.012337e+000	0	0	0	0	0	0	52729.7	1	1	57.5363	45.5
DATA	310	4	55	0	0	A_64_P144869	NM_017131	1822.95	197.932	1.419198e+002	1.466004e+001	188	41	8.142415e+000	0	0	0	0	0	0	124.258	1	1	46.8651	39.9677
DATA	311	4	56	0	0	A_44_P445484	ENSRNOT00000049980	1848.24	197.667	8.413351e+002	8.421450e+001	789	42	1.036949e+001	0	0	0	0	0	0	733.089	1	1	45.4864	43
DATA	312	4	57	0	0	A_42_P487832	NM_001108389	1873.32	198.273	1.089599e+003	1.090231e+002	939	38	6.008000e+000	0	0	0	0	0	0	944.878	1	1	49.8279	38.8966
DATA	313	4	58	0	0	A_42_P482829	NM_001108138	1899.42	198.427	4.667366e+002	4.682241e+001	448	39.5	4.976406e+000	0	0	0	0	0	0	402.691	1	1	57.5363	39.2692
DATA	314	4	59	0	0	A_64_P101440	XM_001065775	1924.58	198.427	3.762808e+000	3.748897e+000	67	41	7.655932e+000	0	0	0	0	0	0	0.771059	0	0	57.5363	40.4483
DATA	315	4	60	0	0	A_64_P072268	NM_001002277	1950	198.455	7.517154e+002	7.526586e+001	707	39	6.898473e+000	0	0	0	0	0	0	642.096	1	1	55.8519	39.0435
DATA	316	4	61	0	0	A_42_P589190	NM_023104	1975.19	198.188	7.188728e+002	7.198690e+001	657	41	1.071090e+001	0	0	0	0	0	0	610.946	1	1	46.1809	43.2174
DATA	317	4	62	0	0	A_64_P027328	A_64_P027328	2000.58	198.427	3.892265e+002	3.910821e+001	398.5	47.5	1.035174e+001	0	0	0	0	0	0	329.121	1	1	57.5363	46.0385
DATA	318	4	63	0	0	A_42_P788541	NM_001106794	2026	198.191	3.362019e+003	3.362237e+002	2909.5	42	8.689025e+000	0	0	0	0	0	0	2828.4	1	1	46.8651	42.8286
DATA	319	4	64	0	0	A_42_P457003	NM_012802	2051.09	198.104	2.942324e+003	2.942575e+002	2399	39	7.327578e+000	0	0	0	0	0	0	2462.99	1	1	46.8651	40.0588
DATA	320	4	65	0	0	A_64_P095695	A_64_P095695	2076.89	198.5	8.083688e+001	8.959337e+000	131	40	7.199822e+000	0	0	0	0	0	0	67.3274	1	1	56.9804	40.8621
DATA	321	4	66	0	0	A_42_P463880	NM_001013927	2102.02	198.164	6.210644e+001	7.324156e+000	112.5	38	8.464510e+000	0	0	0	0	0	0	51.4735	1	1	45.1352	38.9737
DATA	322	4	67	0	0	A_43_P20354	NM_001134574	2127.75	198.438	9.574202e+001	1.033851e+001	145	39.5	8.476110e+000	0	0	0	0	0	0	78.9629	1	1	48.8603	41.6111
DATA	323	4	68	0	0	A_64_P055958	ENSRNOT00000056114	2153.11	198.5	2.627476e+001	4.718915e+000	87	37	9.798670e+000	0	0	0	0	0	0	21.5675	1	1	56.9804	38.7143
DATA	324	4	69	0	0	A_64_P159044	ENSRNOT00000040690	2178.34	198.185	1.034337e+003	1.035086e+002	906	42	9.618951e+000	0	0	0	0	0	0	845.1	1	1	45.4864	42.2963
DATA	325	4	70	0	0	A_44_P473234	ENSRNOT00000024858	2203.67	198.5	2.923248e+002	2.949889e+001	292.5	42	8.710163e+000	0	0	0	0	0	0	237.781	1	1	57.5363	42.5625
DATA	326	4	71	0	0	A_42_P797965	NM_001108497	2229.18	198.347	4.012798e+002	4.032417e+001	385	42	8.149596e+000	0	0	0	0	0	0	324.981	1	1	47.5395	42.973
DATA	327	4	72	0	0	A_42_P592157	NM_001002828	2254.58	198.573	2.023330e+002	2.062284e+001	231.5	39.5	1.091709e+001	0	0	0	1	0	0	163.185	1	1	57.5363	41.7
DATA	328	4	73	0	0	A_64_P016419	NM_001000622	2280.05	198.523	3.443460e+001	5.282001e+000	87	39	7.924478e+000	0	0	0	0	0	0	27.6621	1	1	55.8519	38.8788
DATA	329	4	74	0	0	A_44_P306863	XM_344447	2305.66	198.513	6.409532e+002	6.422128e+001	576	42	8.678180e+000	0	0	0	0	0	0	512.959	1	1	49.8279	41.4595
DATA	330	4	75	0	0	A_42_P471835	TC610276	2330.57	198.608	1.511882e+003	1.512420e+002	1240	38	6.472060e+000	0	0	0	0	0	0	1205.86	1	1	49.1849	37.4643
DATA	331	4	76	0	1	ETG02_36680	ETG02_36680	2356.22	198.721	6.865728e+000	4.104955e+000	70	40	9.530652e+000	0	0	0	0	0	0	5.45833	1	0	46.5243	40.1667
DATA	332	4	77	66	1	DarkCorner	DarkCorner	2381.58	198.573	4.075235e+000	4.059003e+000	59	34	9.242758e+000	0	0	0	0	0	0	-3.00724	0	0	57.5363	37
DATA	333	4	78	66	1	DarkCorner	DarkCorner	2407	198.545	4.085859e+000	4.069585e+000	60	39	8.794781e+000	0	0	0	0	0	0	-0.772909	0	0	55.8519	40.6154
DATA	334	4	79	66	1	DarkCorner	DarkCorner	2432.06	199.52	4.094517e+000	4.078208e+000	58	39	6.168608e+000	0	0	0	0	0	0	-3.08563	0	0	40.2912	40.5
DATA	335	4	80	66	1	DarkCorner	DarkCorner	2456.74	198.348	4.102608e+000	4.086267e+000	59	39	8.859908e+000	0	0	0	0	0	0	-2.45518	0	0	52.9257	39.7692
DATA	336	4	81	66	1	DarkCorner	DarkCorner	2483.08	198.6	4.108871e+000	4.092505e+000	60	43	8.719027e+000	0	0	0	0	0	0	-1.35677	0	0	49.1849	42.4167
DATA	337	4	82	66	1	DarkCorner	DarkCorner	2509.21	198.789	4.113276e+000	4.096927e+000	64	41	8.150408e+000	0	0	0	0	0	0	0.130562	0	0	48.8603	43.3077
DATA	338	4	83	66	1	DarkCorner	DarkCorner	2534	198.545	4.115855e+000	4.099462e+000	55	39	8.498891e+000	0	0	0	0	0	0	-6.32486	0	0	55.8519	41.6579
DATA	339	4	84	66	1	DarkCorner	DarkCorner	2559.88	198.792	4.116309e+000	4.099914e+000	59	40	9.433981e+000	0	0	0	0	0	0	-3.06334	0	0	49.5074	42
DATA	340	4	85	66	1	DarkCorner	DarkCorner	2584.58	198.573	4.114954e+000	4.098563e+000	62	35	8.146699e+000	0	0	0	0	0	0	-0.442176	0	0	57.5363	35.4466
DATA	341	5	1	66	1	DarkCorner	DarkCorner	439	204.455	5.679191e+000	3.811943e+000	64.5	38	8.711328e+000	0	0	0	0	0	0	4.84769	1	0	55.8519	39.1452
DATA	342	5	2	66	1	DarkCorner	DarkCorner	464.418	204.427	7.487383e+000	3.825264e+000	67	42	7.965443e+000	0	0	0	0	0	0	6.42202	1	0	65	43.3448
DATA	343	5	3	66	1	DarkCorner	DarkCorner	489.667	204.5	3.748247e+000	3.733317e+000	57.5	38.5	4.007887e+000	0	0	0	0	0	0	-0.596543	0	0	57.5363	38.8
DATA	344	5	4	66	1	DarkCorner	DarkCorner	514.1	204.9	3.730762e+000	3.715902e+000	59	37	7.091662e+000	0	0	0	0	0	0	-3.05472	0	0	38.6789	37.625
DATA	345	5	5	66	1	DarkCorner	DarkCorner	540.2	204.824	3.712663e+000	3.697875e+000	58	36	7.684761e+000	0	0	0	0	0	0	-2.7249	0	0	51.4001	38
DATA	346	5	6	66	1	DarkCorner	DarkCorner	566.685	204.449	3.694780e+000	3.680063e+000	55	37	5.829653e+000	0	0	0	0	0	0	-5.09953	0	0	52.6241	36.7879
DATA	347	5	7	66	1	DarkCorner	DarkCorner	591.5	204.5	3.678108e+000	3.663458e+000	58	39	4.573185e+000	0	0	0	0	0	0	-3.37986	0	0	57.5363	39.1071
DATA	348	5	8	66	1	DarkCorner	DarkCorner	616.667	204.5	3.661603e+000	3.647018e+000	51	41	8.093136e+000	0	0	0	0	0	0	-9.27362	0	0	57.5363	38.5333
DATA	349	5	9	66	1	DarkCorner	DarkCorner	643.143	203.779	3.645073e+000	3.630555e+000	56	38	8.477105e+000	0	0	0	0	0	0	-6.05791	0	0	48.5334	38.7632
DATA	350	5	10	0	0	A_43_P17919	XM_001070979	667.5	204.5	3.713090e+001	5.182288e+000	93	35	7.233463e+000	0	0	0	0	0	0	33.0471	1	1	57.5363	36.2333
DATA	351	5	11	0	0	A_42_P826221	NM_012933	692.886	204.835	2.628824e+003	2.629071e+002	2388	37	7.337258e+000	0	0	0	0	0	0	2349.68	1	1	50.1463	37.5128
DATA	352	5	12	0	0	A_64_P011524	NM_001194951	718.263	204.711	5.897897e+002	5.908784e+001	580.5	36	7.560393e+000	0	0	0	0	0	0	529.309	1	1	49.5074	35.8529
DATA	353	5	13	0	0	A_44_P258417	NM_001009699	743.7	204.1	9.323684e+001	9.984254e+000	148	36	8.809981e+000	0	0	0	0	0	0	84.0002	1	1	47.2035	36.5172
DATA	354	5	14	0	0	A_64_P164617	A_64_P164617	769.333	204.5	3.701771e+004	3.701773e+003	33038	37	7.823641e+000	0	0	0	0	0	0	33480	1	1	57.5363	40.069
DATA	355	5	15	0	0	A_42_P758933	NM_001106476	794.31	204.465	6.069398e+003	6.069501e+002	5406	39	8.516712e+000	0	0	0	1	0	0	5508.95	1	1	47.8731	39.3571
DATA	356	5	16	0	0	A_42_P573312	NM_001134761	819.737	204.579	4.342653e+002	4.356997e+001	446.5	40	8.580203e+000	0	0	0	0	0	0	395.538	1	1	49.5074	38.7895
DATA	357	5	17	0	0	A_64_P096257	NM_001160228	844.689	204.662	7.127845e+002	7.136537e+001	693.5	38.5	7.152204e+000	0	0	0	0	0	0	651.32	1	1	48.5334	38.1333
DATA	358	5	18	0	0	A_43_P15847	NM_178847	870.573	204.92	7.948561e+001	8.689048e+000	135.5	39	8.334598e+000	0	0	0	0	0	0	72.8626	1	1	48.8603	39.5862
DATA	359	5	19	0	0	A_64_P139962	NM_001000675	896.333	204.5	3.513849e+000	3.515418e+000	63	43	1.025908e+001	0	0	0	0	0	0	3.03787	0	0	57.5363	43.4146
DATA	360	5	20	0	0	A_64_P117474	NM_001000646	921.738	204.934	3.504255e+000	3.494306e+000	65	38	8.954868e+000	0	0	0	0	0	0	1.54239	0	0	44.7812	40.5
DATA	361	5	21	0	1	ERCC-00075_180	ERCC-00075_180	946.858	204.593	2.401817e+001	4.229909e+000	83	43	9.375144e+000	0	0	0	0	0	0	22.1946	1	1	56.9804	43.68
DATA	362	5	22	0	0	A_42_P740730	NM_001012136	972.165	204.532	8.477971e+000	3.575985e+000	70	39	6.508225e+000	0	0	0	0	0	0	7.85197	1	0	50.1463	39.9032
DATA	363	5	23	0	0	A_42_P702258	NM_017227	997.582	204.573	1.774868e+001	3.894821e+000	77	43	9.021613e+000	0	0	0	0	0	0	16.4719	1	1	57.5363	43.5417
DATA	364	5	24	0	0	A_42_P668800	NM_001127553	1022.7	204.9	6.589652e+002	6.598732e+001	668	38	6.573195e+000	0	0	0	0	0	0	612.683	1	1	47.2035	39.2759
DATA	365	5	25	0	0	A_42_P842513	NM_031077	1048.3	204.522	2.863475e+003	2.863683e+002	2753	42	9.179115e+000	0	0	0	0	0	0	2666.55	1	1	46.8651	42.4483
DATA	366	5	26	0	0	A_64_P047697	NM_001161835	1073.77	204.487	2.327208e+002	2.352648e+001	287	42	7.285352e+000	0	0	0	0	0	0	217.011	1	1	49.8279	41.1724
DATA	367	5	27	0	0	A_42_P660036	NM_001134727	1098.7	204.9	1.293850e+002	1.338967e+001	174	39	7.413517e+000	0	0	0	1	0	0	120.788	1	1	47.2035	38.9091
DATA	368	5	28	0	0	A_64_P095050	A_64_P095050	1124.5	205	4.226399e+004	4.226400e+003	38931	40	9.160604e+000	0	0	0	0	0	0	39491.6	1	1	54.1152	40.6667
DATA	369	5	29	0	0	A_42_P561835	ENSRNOT00000043937	1150	205	1.180185e+002	1.229331e+001	172.5	38	1.040668e+001	0	0	0	0	0	0	110.348	1	1	54.9904	39.9677
DATA	370	5	30	0	0	A_64_P098774	ENSRNOT00000002068	1175.32	204.616	1.508437e+001	3.756132e+000	77	41.5	1.072648e+001	0	0	0	0	0	0	14.109	1	0	47.5395	41.6667
DATA	371	5	31	0	0	A_64_P163184	NM_001107855	1200.59	204.851	3.888395e+002	3.903576e+001	425.5	39	8.188659e+000	0	0	0	0	0	0	363.76	1	1	48.5334	38.8519
DATA	372	5	32	0	0	A_42_P549675	NM_080577	1226.17	205	2.674290e+003	2.674511e+002	2452	45	1.153516e+001	0	0	0	0	0	0	2501.6	1	1	46.8651	45.5
DATA	373	5	33	0	0	A_64_P287740	NM_001127601	1251.5	205	3.337096e+001	4.793253e+000	95	43	8.505280e+000	0	0	0	0	0	0	31.2054	1	1	54.1152	44.1613
DATA	374	5	34	0	0	A_64_P059545	NM_053477	1276.66	205.068	2.854301e+003	2.854509e+002	2691	40	6.524202e+000	0	0	0	0	0	0	2667.55	1	1	48.8603	40.7391
DATA	375	5	35	0	0	A_44_P465856	NM_199398	1302.5	205	1.097570e+001	3.616265e+000	72.5	40	7.382724e+000	0	0	0	0	0	0	10.2489	1	0	54.1152	40.7692
DATA	376	5	36	0	0	A_42_P714075	NM_031723	1327.5	205	8.144865e+002	8.152166e+001	815	42	8.823595e+000	0	0	0	0	0	0	759.752	1	1	48.5334	43.3214
DATA	377	5	37	0	0	A_42_P605265	NM_053677	1353	204.902	2.778164e+001	4.432542e+000	90.5	39	1.136544e+001	0	0	0	0	0	0	25.8805	1	1	44.7812	41.44
DATA	378	5	38	0	0	A_64_P047401	NM_001009369	1378.24	205	1.195185e+003	1.195685e+002	1161	39	4.170189e+000	0	0	0	0	0	0	1111.69	1	1	46.8651	38.0952
DATA	379	5	39	0	0	A_64_P018891	A_64_P018891	1403.65	204.903	9.219463e+001	9.849220e+000	148	40	9.448934e+000	0	0	0	0	0	0	85.6011	1	1	48.2044	41.8
DATA	380	5	40	0	0	A_64_P026297	NM_022583	1429.4	204.643	3.118842e+001	4.667479e+000	91	40	1.036744e+001	0	0	0	0	0	0	28.8983	1	1	47.2035	41
DATA	381	5	41	0	0	A_43_P13508	NM_001015031	1453.91	205.17	4.947332e+001	6.048596e+000	111	41	9.297094e+000	0	0	0	0	0	0	45.7435	1	1	38.2652	42.6897
DATA	382	5	42	0	0	A_64_P077426	XM_001080794	1479.74	205.222	8.605647e+003	8.605718e+002	7816	41	1.043103e+001	0	0	0	0	0	0	7937.05	1	1	47.5395	43.1622
DATA	383	5	43	0	0	A_44_P370175	NM_031773	1505.5	205.352	5.617473e+001	6.617552e+000	119	42	9.591037e+000	0	0	0	0	0	0	51.6704	1	1	57.5363	42.8919
DATA	384	5	44	0	0	A_64_P084288	NM_001000496	1531	205.455	4.651605e+000	3.538835e+000	68	40.5	8.215286e+000	0	0	0	0	0	0	4.26626	1	0	55.8519	42.1563
DATA	385	5	45	0	0	A_44_P400936	A_44_P400936	1556.42	205.427	2.336954e+002	2.363300e+001	281	39	6.381862e+000	0	0	0	0	0	0	213.673	1	1	57.5363	38.6176
DATA	386	5	46	0	0	A_64_P019599	NM_012713	1581.26	204.955	2.753721e+002	2.776261e+001	316.5	40	7.389581e+000	0	0	0	0	0	0	250.961	1	1	45.835	38.9655
DATA	387	5	47	0	0	A_44_P644356	AI556299	1607.28	205.083	2.750516e+001	4.485371e+000	92	38	6.033316e+000	0	0	0	0	0	0	24.978	1	1	43.7019	38.3514
DATA	388	5	48	0	0	A_64_P057076	A_64_P057076	1632.03	204.952	1.082480e+002	1.139384e+001	163	38.5	6.567896e+000	0	0	0	0	0	0	97.9511	1	1	45.4864	40.1176
DATA	389	5	49	0	0	A_64_P087392	NM_001108764	1657.89	205.5	1.211963e+002	1.263435e+001	173	38	8.097951e+000	0	0	0	0	0	0	109.245	1	1	65	39.8684
DATA	390	5	50	0	0	A_44_P436604	NM_001025627	1683.42	205.427	1.853330e+001	4.034751e+000	80	43	9.078774e+000	0	0	0	0	0	0	16.6386	1	1	65	43.3
DATA	391	5	51	0	0	A_43_P23200	NM_001107832	1708.58	205.427	3.038321e+002	3.059558e+001	332.5	42	9.376389e+000	0	0	0	0	0	0	271.65	1	1	57.5363	43.8
DATA	392	5	52	0	0	A_42_P515876	NM_031097	1733.86	205.419	3.581736e+002	3.599924e+001	365	41	6.562560e+000	0	0	0	0	0	0	318.868	1	1	48.5334	40.3913
DATA	393	5	53	0	0	A_44_P1047924	NM_053523	1759.14	205.127	2.492810e+003	2.493074e+002	2218	38	6.352186e+000	0	0	0	0	0	0	2209.44	1	1	46.8651	38.7941
DATA	394	5	54	0	0	A_44_P682668	NM_001014228	1784.74	205.274	1.134383e+002	1.191562e+001	162	44	7.621242e+000	0	0	0	0	0	0	100.084	1	1	44.4243	43.6
DATA	395	5	55	0	0	A_64_P061489	NM_001108746	1810.33	205.5	1.585367e+001	3.992245e+000	78	40	1.002513e+001	0	0	0	0	0	0	13.9219	1	0	57.5363	41.3548
DATA	396	5	56	0	0	A_64_P047747	NM_182474	1835.31	205.535	1.342335e+003	1.342840e+002	1249	44.5	9.630144e+000	0	0	0	0	0	0	1173.27	1	1	47.8731	43.0556
DATA	397	5	57	0	0	A_64_P091163	NM_001107083	1861.11	205.5	4.676688e+001	5.962940e+000	105.5	42	8.493893e+000	0	0	0	0	0	0	40.6755	1	1	56.9804	42.1714
DATA	398	5	58	0	0	A_64_P133992	NM_001008825	1886.5	205.5	4.312461e+001	5.693679e+000	100	40	8.222535e+000	0	0	0	0	0	0	37.3234	1	1	57.5363	41.0857
DATA	399	5	59	0	0	A_42_P503768	NM_001009466	1911.66	205.709	2.069225e+002	2.102680e+001	241	39	4.943555e+000	0	0	0	0	0	0	178.208	1	1	50.7771	38.5652
DATA	400	5	60	0	0	A_44_P400346	ENSRNOT00000059540	1937.33	205.5	5.621796e+001	6.760544e+000	112	42	7.603055e+000	0	0	0	0	0	0	48.1704	1	1	57.5363	41.8387
DATA	401	5	61	0	0	A_64_P128438	NM_012591	1962.48	205.147	1.338589e+003	1.339120e+002	1182	39	1.077784e+001	0	0	0	0	0	0	1141.21	1	1	49.8279	41.4762
DATA	402	5	62	0	0	A_44_P531758	NM_012935	1987.75	205.487	2.310864e+004	2.310867e+003	19054	41	1.024334e+001	0	0	0	0	0	0	19602.6	1	1	49.1849	42.5
DATA	403	5	63	0	0	A_43_P10257	NM_203335	2013.16	205.747	3.556944e+003	3.557148e+002	2984	45	1.011707e+001	0	0	0	0	0	0	3002.09	1	1	48.5334	45.7
DATA	404	5	64	0	0	A_64_P011744	NM_001108789	2038.58	205.573	2.310739e+002	2.342290e+001	265	39.5	9.290506e+000	0	0	0	0	0	0	194.042	1	1	57.5363	40.4063
DATA	405	5	65	0	0	A_44_P282794	NM_001107523	2064.06	205.521	2.668092e+001	4.684881e+000	84.5	40	8.247434e+000	0	0	0	0	0	0	22.2925	1	1	48.2044	41.2571
DATA	406	5	66	0	0	A_42_P463784	NM_001008526	2089.23	205.884	7.729417e+002	7.739098e+001	698	42	6.526943e+000	0	0	0	1	0	0	642.665	1	1	46.5243	41.6207
DATA	407	5	67	0	0	A_42_P630463	NM_022238	2114.33	206.167	1.694525e+002	1.738565e+001	202.5	39	7.454005e+000	0	0	0	0	0	0	140.216	1	1	47.8731	40.2927
DATA	408	5	68	0	0	A_64_P006728	NM_001108905	2140.38	206	1.742563e+003	1.743001e+002	1472	42	9.486620e+000	0	0	0	0	0	0	1434.81	1	1	48.5334	42.5625
DATA	409	5	69	0	0	A_44_P360629	NM_001000030	2165.65	205.58	6.937537e+001	7.971420e+000	122.5	37	1.008288e+001	0	0	0	0	0	0	56.8547	1	1	47.2035	38.7419
DATA	410	5	70	0	0	A_64_P024620	NM_001006995	2190.81	205.739	1.287887e+004	1.287893e+003	10519	43	1.052565e+001	0	0	0	0	0	0	10507.1	1	1	46.5243	43.4516
DATA	411	5	71	0	0	A_64_P091194	ENSRNOT00000049254	2216.56	205.6	8.399365e+003	8.399459e+002	6841	43	8.412102e+000	0	0	0	0	0	0	6821.87	1	1	50.7771	43.575
DATA	412	5	72	0	0	A_44_P334922	NM_022379	2241.91	205.614	3.994244e+000	3.978335e+000	61.5	40	1.009501e+001	0	0	0	0	0	0	-1.55549	0	0	57.259	43.7667
DATA	413	5	73	0	0	A_42_P482051	XM_001059157	2267.17	205.829	5.959189e+002	5.972561e+001	526	38.5	1.014810e+001	0	0	0	1	0	0	480.028	1	1	46.8651	39.5294
DATA	414	5	74	0	0	A_42_P674742	XM_002726367	2292.2	206	3.914569e+003	3.914774e+002	3133.5	42	7.726183e+000	0	0	0	0	0	0	3141.44	1	1	49.1849	41.3902
DATA	415	5	75	0	0	A_64_P105211	XM_233310	2318.09	205.935	1.291556e+001	4.226325e+000	72	41	7.747922e+000	0	0	0	0	0	0	10.3267	1	0	54.4085	41.0303
DATA	416	5	76	0	0	A_64_P058523	NM_134385	2343.5	206	7.024465e+000	4.098228e+000	66.5	40	8.099512e+000	0	0	0	0	0	0	5.59774	1	0	54.1152	39.8108
DATA	417	5	77	0	0	A_44_P586876	NM_001100805	2368.94	205.814	8.824341e+002	8.833630e+001	769	36	7.209760e+000	0	0	0	0	0	0	701.04	1	1	51.4001	36.7742
DATA	418	5	78	66	1	DarkCorner	DarkCorner	2393.65	205.986	4.077072e+000	4.060833e+000	59	38	8.689315e+000	0	0	0	0	0	0	-2.18294	0	0	47.5395	39.2857
DATA	419	5	79	66	1	DarkCorner	DarkCorner	2420.24	206.075	4.087373e+000	4.071093e+000	61.5	39	7.201030e+000	0	0	0	0	0	0	-3.0738	0	0	45.835	40.125
DATA	420	5	80	66	1	DarkCorner	DarkCorner	2445.57	206.045	4.095773e+000	4.079459e+000	56	40	8.154424e+000	0	0	0	0	0	0	-4.24679	0	0	45.835	40.8065
DATA	421	5	81	66	1	DarkCorner	DarkCorner	2470.5	206	4.102542e+000	4.086201e+000	57	42	8.713670e+000	0	0	0	0	0	0	-4.07948	0	0	54.1152	41.1463
DATA	422	5	82	66	1	DarkCorner	DarkCorner	2495.44	206.063	4.107655e+000	4.091294e+000	59	40.5	7.302261e+000	0	0	0	0	0	0	-3.09054	0	0	44.0646	40.6389
DATA	423	5	83	66	1	DarkCorner	DarkCorner	2521.5	206	4.111224e+000	4.094849e+000	57	40.5	8.519079e+000	0	0	0	0	0	0	-3.25967	0	0	54.1152	42.6667
DATA	424	5	84	66	1	DarkCorner	DarkCorner	2546.69	205.971	4.112759e+000	4.096378e+000	59	38	9.276383e+000	0	0	0	0	0	0	-0.861205	0	0	46.1809	40.5
DATA	425	5	85	66	1	DarkCorner	DarkCorner	2572.09	206.065	4.112236e+000	4.095857e+000	57	38	8.917178e+000	0	0	0	0	0	0	-4.62384	0	0	54.4085	39.2326
DATA	426	6	1	66	1	DarkCorner	DarkCorner	452.113	211.525	6.752616e+000	3.815190e+000	65	44	7.138064e+000	0	0	0	0	0	0	5.78612	1	0	50.4627	43.7838
DATA	427	6	2	66	1	DarkCorner	DarkCorner	477.418	211.573	3.752054e+000	3.741181e+000	63	41	5.325888e+000	0	0	0	0	0	0	1.50225	0	0	65	42.0714
DATA	428	6	3	66	1	DarkCorner	DarkCorner	501.873	211.825	3.734741e+000	3.726525e+000	62	41	6.677035e+000	0	0	0	0	0	0	1.92614	0	0	45.4864	39.129
DATA	429	6	4	66	1	DarkCorner	DarkCorner	528.353	211.553	3.716569e+000	3.701765e+000	56	37.5	6.919832e+000	0	0	0	0	0	0	-4.22176	0	0	52.0157	38.1842
DATA	430	6	5	66	1	DarkCorner	DarkCorner	552.698	211.337	3.700071e+000	3.685334e+000	57	39	6.922597e+000	0	0	0	0	0	0	-3.65185	0	0	52.0157	38.8788
DATA	431	6	6	66	1	DarkCorner	DarkCorner	578.442	211.675	3.682584e+000	3.671176e+000	60.5	40	6.241250e+000	0	0	0	0	0	0	1.35667	0	0	49.8279	39.8966
DATA	432	6	7	66	1	DarkCorner	DarkCorner	604.239	211.268	3.665863e+000	3.651262e+000	56.5	38.5	6.941174e+000	0	0	0	0	0	0	-3.68707	0	0	47.2035	37.5714
DATA	433	6	8	66	1	DarkCorner	DarkCorner	629.5	211.648	3.649442e+000	3.634906e+000	58.5	38	7.261860e+000	0	0	0	0	0	0	-3.90614	0	0	65	38.2619
DATA	434	6	9	0	0	A_64_P034324	NM_001108282	654.85	212	5.256898e+001	6.382149e+000	108	39	8.480028e+000	0	0	0	0	0	0	46.7376	1	1	49.1849	39.7059
DATA	435	6	10	0	0	A_64_P071506	ENSRNOT00000025007	679.825	212.439	1.535708e+001	3.917252e+000	74	34.5	7.159409e+000	0	0	0	0	0	0	13.7115	1	0	42.9674	36
DATA	436	6	11	0	0	A_64_P050705	NM_001106061	705.437	212.028	1.610988e+002	1.650481e+001	203	36.5	7.925246e+000	0	0	0	0	0	0	144.426	1	1	48.2044	36.9286
DATA	437	6	12	0	0	A_64_P032242	NM_001008898	731	212	4.170103e+000	3.598848e+000	65	36	6.589511e+000	0	0	0	0	0	0	3.75352	1	0	65	35.037
DATA	438	6	13	0	0	A_42_P730320	NM_001013877	756.5	212	3.397741e+001	4.921831e+000	94	36	7.793453e+000	0	0	0	0	0	0	30.7012	1	1	54.1152	37.3125
DATA	439	6	14	0	0	A_64_P123073	A_64_P123073	781.5	212	2.475905e+002	2.501197e+001	285	39	8.466010e+000	0	0	0	0	0	0	224.529	1	1	48.5334	40.44
DATA	440	6	15	0	0	A_64_P064709	NM_001166303	806.897	211.985	4.719516e+001	5.896940e+000	104.5	38	6.925078e+000	0	0	0	0	0	0	42.9498	1	1	46.8651	36.6364
DATA	441	6	16	0	0	A_44_P123381	NM_013012	832.625	212.109	8.258137e+000	3.619027e+000	69	39.5	8.043248e+000	0	0	0	0	0	0	7.54089	1	0	45.1352	38.5417
DATA	442	6	17	0	0	A_44_P557487	NM_053617	858.153	212.139	2.382066e+001	4.243938e+000	83	41	8.114412e+000	0	0	0	0	0	0	21.8209	1	1	46.8651	40.4667
DATA	443	6	18	0	0	A_64_P084971	NM_017007	883	212.203	1.665907e+004	1.665910e+003	15056	44	9.102876e+000	0	0	0	0	0	0	15305	1	1	46.8651	44.0769
DATA	444	6	19	0	0	A_42_P770556	NM_033096	908.347	212.067	4.417791e+003	4.417929e+002	4065	39	8.557043e+000	0	0	0	0	0	0	4069.9	1	1	49.1849	40.5333
DATA	445	6	20	0	0	A_64_P023381	XM_001073278	934.392	212.069	4.332575e+001	5.559230e+000	103	42	1.033719e+001	0	0	0	0	0	0	40.0191	1	1	65	43.6296
DATA	446	6	21	0	0	A_64_P059217	NM_053667	959.5	212.352	1.627039e+002	1.663738e+001	218	43	1.003226e+001	0	0	0	0	0	0	150.641	1	1	57.5363	44.6154
DATA	447	6	22	0	0	A_44_P286215	NM_001008885	984.912	212.386	2.206082e+002	2.233170e+001	265	41	8.300741e+000	0	0	0	0	0	0	204.69	1	1	57.259	40.8333
DATA	448	6	23	0	0	A_64_P138056	A_64_P138056	1010	211.576	2.900917e+002	2.921496e+001	335	38	7.583312e+000	0	0	0	0	0	0	269.649	1	1	45.4864	39.3929
DATA	449	6	24	0	0	A_44_P280799	NM_001000654	1035.48	211.467	1.552993e+001	3.788536e+000	78	40	7.407639e+000	0	0	0	0	0	0	14.4599	1	0	43.7019	40.8387
DATA	450	6	25	0	0	A_64_P111599	NM_001191586	1060.93	212.067	2.893298e+002	2.913798e+001	331	42	7.383607e+000	0	0	0	0	0	0	269.804	1	1	46.8651	42.2
DATA	451	6	26	0	0	A_64_P088635	ENSRNOT00000059643	1086.5	212.352	1.149584e+001	3.632712e+000	73	43	7.557389e+000	0	0	0	0	0	0	10.7335	1	0	65	41.625
DATA	452	6	27	0	0	A_64_P042332	NM_021860	1112	212.455	3.456344e+000	3.447459e+000	66	39	9.482004e+000	0	0	0	0	0	0	1.71402	0	0	55.8519	39.6216
DATA	453	6	28	0	0	A_42_P599080	NM_053753	1137.19	212.365	1.916700e+002	1.947326e+001	240	38.5	1.028720e+001	0	0	0	0	0	0	179.271	1	1	49.1849	41.9667
DATA	454	6	29	0	0	A_44_P576954	NM_001106645	1162.44	212.208	2.300734e+002	2.326285e+001	273	41.5	9.908243e+000	0	0	0	0	0	0	215.296	1	1	49.8279	42.1071
DATA	455	6	30	0	0	A_64_P046687	A_64_P046687	1188.07	212.014	1.648568e+003	1.648926e+002	1573	42	1.160664e+001	0	0	0	0	0	0	1543.07	1	1	46.8651	44.7742
DATA	456	6	31	0	0	A_42_P694928	NM_001109046	1213.29	211.884	2.620992e+002	2.643437e+001	305	45	1.044679e+001	0	0	0	0	0	0	245.328	1	1	46.1809	46.2759
DATA	457	6	32	0	0	A_64_P032811	NM_001134575	1238.51	211.926	3.722235e+001	5.067184e+000	98	46	1.074784e+001	0	0	0	0	0	0	34.833	1	1	47.2035	47.129
DATA	458	6	33	0	0	A_64_P141070	ENSRNOT00000058701	1264.42	212.427	6.060933e+001	6.968973e+000	123	46	7.796604e+000	0	0	0	0	0	0	56.694	1	1	57.5363	45.75
DATA	459	6	34	0	0	A_64_P093462	NM_001108129	1289.56	212.26	9.564541e+003	9.564603e+002	8889	39	6.123724e+000	0	0	0	0	0	0	8940.24	1	1	49.5074	40
DATA	460	6	35	0	0	A_42_P799306	ENSRNOT00000015782	1314.44	212.467	4.283935e+001	5.497502e+000	104.5	41	4.055446e+000	0	0	0	0	0	0	40.0064	1	1	49.5074	41.087
DATA	461	6	36	0	0	A_42_P726743	NM_001108985	1340.38	212.237	6.720482e+002	6.729329e+001	681.5	44	8.121764e+000	0	0	0	0	0	0	626.832	1	1	49.1849	45.0345
DATA	462	6	37	0	0	A_44_P228341	NM_001025701	1365.73	212.155	1.679078e+003	1.679433e+002	1583.5	39	4.966075e+000	0	0	0	0	0	0	1563.86	1	1	47.5395	38.4762
DATA	463	6	38	0	0	A_42_P571433	NM_031059	1390.8	212.421	1.603646e+003	1.604019e+002	1516	38	6.548824e+000	0	0	0	0	0	0	1491.18	1	1	49.1849	37.625
DATA	464	6	39	0	0	A_44_P132783	NM_214833	1416.5	212.5	7.314851e+001	8.094803e+000	130	40	7.210315e+000	0	0	0	0	0	0	67.8884	1	1	57.5363	40.3636
DATA	465	6	40	0	0	A_44_P119215	NM_001108941	1442.11	212.5	3.533563e+001	4.955456e+000	97.5	40	9.962751e+000	0	0	0	0	0	0	32.7244	1	1	65	41.8889
DATA	466	6	41	0	0	A_44_P124259	XM_345871	1467.5	212.5	2.915944e+001	4.542039e+000	90	41	9.421313e+000	0	0	0	0	0	0	26.9411	1	1	57.5363	41.7692
DATA	467	6	42	0	0	A_44_P422063	NM_001107631	1492.53	212.48	1.565334e+002	1.603796e+001	208	41.5	9.370295e+000	0	0	0	0	0	0	144.259	1	1	49.1849	43.0625
DATA	468	6	43	0	0	A_44_P1033023	NM_013063	1517.81	212.533	4.762830e+003	4.762958e+002	4234	39	8.776802e+000	0	0	0	0	0	0	4377.25	1	1	49.5074	40.75
DATA	469	6	44	0	0	A_64_P121618	NM_001134542	1543.58	212.573	2.217306e+002	2.244940e+001	269	42	7.216514e+000	0	0	0	0	0	0	203.164	1	1	57.5363	42.7568
DATA	470	6	45	0	0	A_64_P042188	ENSRNOT00000034890	1568.81	212.261	4.023989e+003	4.024143e+002	3803	41	6.858349e+000	0	0	0	0	0	0	3675.29	1	1	46.5243	39.5862
DATA	471	6	46	0	0	A_42_P561616	AI234869	1594.01	212.192	4.343652e+002	4.358009e+001	445	38	7.942739e+000	0	0	0	0	0	0	395.394	1	1	47.2035	37.7143
DATA	472	6	47	0	0	A_42_P588606	NM_001134544	1619.58	212.573	1.405742e+002	1.449807e+001	193	39	7.653659e+000	0	0	0	0	0	0	127.507	1	1	57.5363	40.6129
DATA	473	6	48	0	0	A_42_P568897	NM_001005563	1644.81	212.608	3.520843e+002	3.538799e+001	375.5	39	7.697276e+000	0	0	0	0	0	0	318.172	1	1	49.1849	40.1163
DATA	474	6	49	0	0	A_64_P096356	NM_012640	1670.5	212.5	1.414467e+004	1.414472e+003	12852	41.5	7.942897e+000	0	0	0	0	0	0	12731.7	1	1	49.1849	41.7895
DATA	475	6	50	0	0	A_64_P006418	A_64_P006418	1696.05	212.527	3.486675e+003	3.486860e+002	3245.5	38.5	7.485436e+000	0	0	0	0	0	0	3125.54	1	1	53.8203	40.5714
DATA	476	6	51	0	0	A_64_P156389	A_64_P156389	1721.04	212.436	6.537656e+001	7.465351e+000	127	42	9.615711e+000	0	0	0	0	0	0	58.3619	1	1	49.8279	43.4762
DATA	477	6	52	0	0	A_42_P576446	NM_001107673	1746.62	212.763	4.061738e+003	4.061900e+002	3507.5	39	5.839428e+000	0	0	0	0	0	0	3610.13	1	1	49.1849	39.9677
DATA	478	6	53	0	0	A_64_P022804	A_64_P022804	1771.87	212.757	1.155886e+003	1.156458e+002	1087	38	7.615078e+000	0	0	0	0	0	0	1022.79	1	1	46.5243	39.2857
DATA	479	6	54	0	0	A_64_P162356	A_64_P162356	1797.27	212.845	5.553489e+003	5.553610e+002	4862.5	43.5	7.167877e+000	0	0	0	0	0	0	4891.51	1	1	47.5395	43.5385
DATA	480	6	55	0	0	A_44_P266776	NM_199388	1822.9	212.74	5.640779e+002	5.652708e+001	549.5	40	7.401460e+000	0	0	0	0	0	0	494.479	1	1	47.8731	39.6667
DATA	481	6	56	0	0	A_64_P035066	NM_001008960	1848.33	213.108	7.691056e+000	3.767300e+000	73	46	9.211759e+000	0	0	0	0	0	0	6.70997	1	0	50.1463	45.1471
DATA	482	6	57	0	0	A_64_P072728	NM_001100667	1873.64	212.87	3.801879e+003	3.802059e+002	3324	41	8.041559e+000	0	0	0	0	0	0	3300.74	1	1	46.8651	39.8
DATA	483	6	58	0	0	A_64_P028446	NM_001106007	1898.96	213	1.296749e+003	1.297284e+002	1135	40.5	8.401229e+000	0	0	0	0	0	0	1120.29	1	1	46.8651	40.5
DATA	484	6	59	0	0	A_44_P251212	NM_031715	1924.24	213	2.087289e+004	2.087292e+003	18026	41	6.148407e+000	0	0	0	0	0	0	17943.1	1	1	46.8651	39.8929
DATA	485	6	60	0	0	A_42_P818240	NM_001108334	1949.56	212.973	8.487125e+003	8.487208e+002	7156	40	9.327317e+000	0	0	0	0	0	0	7259.32	1	1	48.5334	41.0333
DATA	486	6	61	0	0	A_64_P023122	NM_001080208	1975.5	213	1.444315e+001	4.047631e+000	76.5	40	1.192099e+001	0	0	0	0	0	0	12.2901	1	0	54.1152	40.12
DATA	487	6	62	0	0	A_44_P217821	NM_001107292	2000.46	212.841	3.358203e+002	3.379636e+001	339	46	9.915812e+000	0	0	0	0	0	0	284.337	1	1	47.2035	46.36
DATA	488	6	63	0	0	A_64_P007372	NM_001105895	2026	213	6.056102e+000	3.867096e+000	70	43	9.632122e+000	0	0	0	0	0	0	5.10177	1	0	65	44
DATA	489	6	64	0	0	A_42_P792382	NM_017257	2051.24	213	2.905823e+003	2.906076e+002	2446	41	7.375096e+000	0	0	0	0	0	0	2435.72	1	1	46.8651	41.7273
DATA	490	6	65	0	0	A_43_P12232	NM_022512	2076.72	213.11	1.307511e+003	1.308080e+002	1117	39	8.190918e+000	0	0	0	0	0	0	1090.53	1	1	49.8279	39.3448
DATA	491	6	66	0	0	A_64_P158475	A_64_P158475	2102.28	213.135	4.648552e+003	4.648714e+002	3907.5	42	5.723346e+000	0	0	0	0	0	0	3858.01	1	1	48.5334	41.9706
DATA	492	6	67	0	0	A_64_P043361	NM_001197023	2127.92	213.329	6.913205e+001	7.935296e+000	117.5	41	8.322401e+000	0	0	0	0	0	0	57.0971	1	1	47.8731	41.9355
DATA	493	6	68	0	0	A_64_P080851	NM_001105753	2153.09	213.386	2.527123e+001	4.658947e+000	85	42	1.026784e+001	0	0	0	0	0	0	20.7743	1	1	57.259	42
DATA	494	6	69	0	0	A_44_P129330	NM_001107505	2178.09	212.672	6.381637e+002	6.393740e+001	586	42	9.235276e+000	0	0	0	0	0	0	522.186	1	1	45.1352	41.5
DATA	495	6	70	0	0	A_64_P008827	NM_001014012	2203.58	213.427	1.068146e+003	1.068876e+002	905	41	9.438497e+000	0	0	0	0	0	0	870.172	1	1	57.5363	43.0909
DATA	496	6	71	0	0	A_64_P026222	NM_001101019	2229.42	213.427	3.932981e+001	5.586124e+000	97	41	9.750388e+000	0	0	0	0	0	0	31.8999	1	1	57.5363	42.8485
DATA	497	6	72	0	0	A_64_P067749	NM_012659	2254.16	212.821	1.317525e+004	1.317531e+003	10607	38.5	9.439109e+000	0	0	0	0	0	0	10642.6	1	1	46.1809	39.5
DATA	498	6	73	0	0	A_44_P362981	NM_145878	2279.69	213.338	2.326725e+004	2.326728e+003	18103.5	42	9.951607e+000	0	0	0	0	0	0	18721.4	1	1	48.5334	42.0345
DATA	499	6	74	0	0	A_64_P146654	NM_031698	2305.18	213.25	1.368484e+003	1.369073e+002	1148.5	42.5	7.914223e+000	0	0	0	0	0	0	1097.01	1	1	47.8731	41.7778
DATA	500	6	75	0	0	A_42_P548800	NM_001007696	2330.57	213.392	2.566120e+003	2.566436e+002	2016	38	6.157651e+000	0	0	0	0	0	0	2049.99	1	1	49.1849	37.6
DATA	501	6	76	0	0	A_44_P310581	BG673348	2355.7	213	2.343488e+003	2.343836e+002	1911	39	7.852313e+000	0	0	0	0	0	0	1866.15	1	1	49.1849	38.4
DATA	502	6	77	0	0	A_64_P062269	XM_001067531	2381.63	213.37	1.961125e+002	2.002554e+001	224	38.5	1.034964e+001	0	0	0	0	0	0	155.711	1	1	48.2044	40.8214
DATA	503	6	78	66	1	DarkCorner	DarkCorner	2407	213.455	4.078985e+000	4.062738e+000	61	39.5	7.552304e+000	0	0	0	0	0	0	-1.68911	0	0	55.8519	39.8611
DATA	504	6	79	66	1	DarkCorner	DarkCorner	2432.42	213.427	4.088127e+000	4.071844e+000	59	40.5	8.434343e+000	0	0	0	0	0	0	-4.97174	0	0	65	41.7941
DATA	505	6	80	66	1	DarkCorner	DarkCorner	2457.98	213.864	4.095590e+000	4.079277e+000	56	41	7.735457e+000	0	0	0	0	0	0	-6.10312	0	0	52.9257	39.6389
DATA	506	6	81	66	1	DarkCorner	DarkCorner	2483.48	214.015	4.101548e+000	4.091897e+000	63	41	6.563258e+000	0	0	0	0	0	0	1.84152	0	0	47.2035	40.1724
DATA	507	6	82	66	1	DarkCorner	DarkCorner	2508.57	213.538	4.106022e+000	4.089667e+000	56.5	43	7.253281e+000	0	0	0	0	0	0	-4.76841	0	0	45.1352	43.4857
DATA	508	6	83	66	1	DarkCorner	DarkCorner	2533.07	213.482	4.108462e+000	4.092097e+000	56	38	8.948687e+000	0	0	0	0	0	0	-6.18201	0	0	51.0895	41.4571
DATA	509	6	84	66	1	DarkCorner	DarkCorner	2559.5	213.5	4.109016e+000	4.092650e+000	58.5	38	8.545282e+000	0	0	0	0	0	0	-3.30274	0	0	57.5363	40.5143
DATA	510	6	85	66	1	DarkCorner	DarkCorner	2584.67	213.5	4.107470e+000	4.091110e+000	58	35	8.036119e+000	0	0	0	0	0	0	-2.82625	0	0	57.5363	35.0054
DATA	511	7	1	66	1	DarkCorner	DarkCorner	438.535	218.718	1.018825e+001	3.894890e+000	71	41	9.497135e+000	0	0	0	0	0	0	8.71999	1	0	47.2035	41.9638
DATA	512	7	2	66	1	DarkCorner	DarkCorner	464.5	219	3.755916e+000	3.755717e+000	65	42.5	8.681826e+000	0	0	0	0	0	0	2.86113	0	0	65	41.6316
DATA	513	7	3	66	1	DarkCorner	DarkCorner	489.5	219	3.738511e+000	3.723621e+000	57	41	6.705450e+000	0	0	0	0	0	0	-3.81576	0	0	54.1152	40.9655
DATA	514	7	4	66	1	DarkCorner	DarkCorner	514.839	219.161	3.720930e+000	3.706109e+000	55	38	8.332497e+000	0	0	0	0	0	0	-5.16371	0	0	45.1352	39.7949
DATA	515	7	5	66	1	DarkCorner	DarkCorner	540.448	218.687	3.703792e+000	3.689040e+000	58	41	1.134578e+001	0	0	0	0	0	0	-2.30124	0	0	46.5243	42.32
DATA	516	7	6	66	1	DarkCorner	DarkCorner	565.479	218.945	3.686848e+000	3.672163e+000	55.5	40	6.427504e+000	0	0	0	0	0	0	-5.11248	0	0	48.5334	40.2069
DATA	517	7	7	66	1	DarkCorner	DarkCorner	591.339	219.242	3.669665e+000	3.655049e+000	56.5	36	6.820271e+000	0	0	0	0	0	0	-3.48888	0	0	44.4243	36.6333
DATA	518	7	8	66	1	DarkCorner	DarkCorner	616.878	219.378	3.653169e+000	3.638618e+000	57	36	7.098879e+000	0	0	0	0	0	0	-4.51957	0	0	49.1849	36.4138
DATA	519	7	9	0	0	A_64_P051297	NM_001107416	642.031	218.723	2.562341e+003	2.562597e+002	2336	41	8.595533e+000	0	0	0	0	0	0	2275.4	1	1	45.4864	41.0227
DATA	520	7	10	0	0	A_64_P162378	A_64_P162378	667.5	219.352	3.417944e+004	3.417946e+003	30311	41	8.974151e+000	0	0	0	0	0	0	30484.7	1	1	57.5363	40.1538
DATA	521	7	11	0	0	A_64_P030634	ENSRNOT00000042606	692.912	219.386	7.631050e+001	8.434405e+000	128.5	34	7.855871e+000	0	0	0	0	0	0	68.3446	1	1	57.259	35.7027
DATA	522	7	12	0	0	A_64_P110009	NM_024392	718	218.922	4.366485e+003	4.366631e+002	3947	39	7.594236e+000	0	0	0	0	0	0	3925.98	1	1	46.1809	38.6207
DATA	523	7	13	0	0	A_42_P618145	NM_001080783	743.242	218.667	2.458619e+003	2.458877e+002	2198.5	36	7.189745e+000	0	0	0	0	0	0	2219.06	1	1	45.4864	36.1143
DATA	525	7	15	0	0	A_64_P101770	NM_001000074	794.5	219.352	4.641053e+000	3.568688e+000	67.5	39	8.507458e+000	0	0	0	0	0	0	4.22019	1	0	57.5363	39.3448
DATA	526	7	16	0	0	A_42_P735934	NM_001105729	819.712	218.833	3.382262e+003	3.382446e+002	3223	39	9.331502e+000	0	0	0	0	0	0	3085.77	1	1	45.835	37.3333
DATA	528	7	18	0	0	A_42_P718331	NM_133522	870.437	219.521	9.142103e+002	9.148817e+001	885	37	6.489222e+000	0	0	0	0	0	0	839.371	1	1	48.2044	38.12
DATA	529	7	19	0	0	A_64_P118054	NM_001037651	896.107	219.5	1.586839e+001	3.837763e+000	78	41.5	8.516781e+000	0	0	0	0	0	0	14.6113	1	0	56.9804	41.7105
DATA	530	7	20	0	0	A_64_P044613	A_64_P044613	921.5	219.5	5.865379e+004	5.865380e+003	54995	38	8.423157e+000	0	0	0	0	0	0	54150.3	1	1	57.5363	38.8571
DATA	531	7	21	0	0	A_43_P13241	NM_134334	946.893	219.5	1.396368e+004	1.396372e+003	12834	43	7.851774e+000	0	0	0	0	0	0	12923	1	1	56.9804	43.5417
DATA	532	7	22	0	0	A_44_P524748	NM_001000712	972.418	219.427	3.482748e+000	3.468876e+000	60.5	41	6.386966e+000	0	0	0	0	0	0	-2.56444	0	0	57.5363	42.28
DATA	533	7	23	0	0	A_64_P126797	ENSRNOT00000048363	997.877	219.4	6.770802e+001	7.604512e+000	126	42.5	1.222691e+001	0	0	0	0	0	0	62.9281	1	1	45.1352	43.3571
DATA	535	7	25	0	0	A_42_P730411	NM_001012181	1048.14	219.194	6.312322e+002	6.321746e+001	654.5	42	8.148620e+000	0	0	0	0	0	0	588.603	1	1	47.5395	42.6
DATA	536	7	26	0	0	A_64_P049501	NM_001047970	1073.94	219.482	2.707258e+001	4.382097e+000	87	43	9.566774e+000	0	0	0	0	0	0	25.279	1	1	51.0895	44.1471
DATA	537	7	27	0	0	A_42_P623688	NM_031031	1098.82	219.361	4.548448e+003	4.548578e+002	4135	42	9.467293e+000	0	0	0	0	0	0	4251.62	1	1	47.8731	42
DATA	538	7	28	0	0	A_42_P601217	NM_053460	1124.4	219.562	1.178315e+002	1.227477e+001	170.5	35	8.439874e+000	0	0	0	0	0	0	110.239	1	1	48.2044	37.75
DATA	540	7	30	0	0	A_42_P791872	NM_001135174	1175.27	219.418	4.538057e+003	4.538187e+002	4125.5	45	1.226993e+001	0	0	0	0	0	0	4249.82	1	1	50.7771	46.0857
DATA	542	7	32	0	0	A_44_P557172	NM_177936	1226.42	219.573	5.388558e+001	6.390626e+000	115	50	1.155315e+001	0	0	0	0	0	0	50.4646	1	1	57.5363	49.7586
DATA	543	7	33	0	0	A_64_P118812	NM_001000512	1251.58	219.573	3.569027e+000	3.455322e+000	65.5	47	8.659643e+000	0	0	0	0	0	0	3.34126	1	0	57.5363	47.2143
DATA	544	7	34	0	0	A_64_P019425	NM_172035	1277	219.545	1.079994e+002	1.133423e+001	164	44	8.447394e+000	0	0	0	0	0	0	101.047	1	1	55.8519	44.6071
DATA	545	7	35	0	0	A_42_P726743	NM_001108985	1302.01	219.583	7.189978e+002	7.198211e+001	715.5	37.5	6.989324e+000	0	0	0	0	0	0	672.157	1	1	48.5334	37.2273
DATA	546	7	36	0	0	A_42_P558703	NM_001106810	1327.56	219.74	2.157315e+002	2.184655e+001	264.5	43	4.978106e+000	0	0	0	0	0	0	201.461	1	1	49.5074	44.3077
DATA	547	7	37	0	0	A_42_P619806	TC590118	1353.06	219.3	4.330852e+002	4.344573e+001	465	40	7.355531e+000	0	0	0	0	0	0	403.889	1	1	46.8651	40.3438
DATA	548	7	38	0	0	A_64_P072247	XM_001055615	1378.47	219.579	6.508815e+001	7.369155e+000	125	37	9.930547e+000	0	0	0	0	0	0	60.6072	1	1	41.8414	39.5172
DATA	549	7	39	0	0	A_64_P104164	A_64_P104164	1403.94	219.54	1.431944e+004	1.431948e+003	13633	40	7.377800e+000	0	0	0	0	0	0	13309.7	1	1	44.0646	39.7429
DATA	550	7	40	0	0	A_42_P672103	NM_021770	1429.19	219.608	1.306648e+004	1.306653e+003	11997	44	9.588503e+000	0	0	0	0	0	0	12120.9	1	1	49.1849	42.5758
DATA	551	7	41	0	0	A_64_P090942	NM_001000406	1454.24	219.646	3.973042e+000	3.498820e+000	67	40	1.183240e+001	0	0	0	0	0	0	3.67739	1	0	50.4627	41.5455
DATA	552	7	42	0	0	A_64_P149491	ENSRNOT00000025458	1479.49	220.403	4.924034e+001	6.032228e+000	108.5	41	8.916221e+000	0	0	0	0	0	0	45.4676	1	1	45.835	41.7188
DATA	553	7	43	0	0	A_42_P552441	NR_002704	1505.17	220	1.046474e+004	1.046480e+003	9355	42	1.099246e+001	0	0	0	0	0	0	9636.57	1	1	46.8651	43.1176
DATA	554	7	44	0	0	A_64_P060419	ENSRNOT00000055060	1530.07	219.492	3.518056e+000	3.504043e+000	61	39	7.250576e+000	0	0	0	0	0	0	-2.79727	0	0	43.3362	40.4615
DATA	555	7	45	0	0	A_44_P161233	NM_019165	1556.12	219.716	3.488070e+002	3.505737e+001	369.5	41.5	8.329966e+000	0	0	0	0	0	0	319.278	1	1	45.835	41.2632
DATA	556	7	46	66	-1	(-)3xSLv1	NegativeControl	1581.5	220	3.540665e+000	3.526562e+000	57	39	7.254267e+000	0	0	0	0	0	0	-4.78053	0	0	54.1152	39.0244
DATA	557	7	47	0	0	A_43_P12519	NM_031114	1606.78	219.866	4.712462e+003	4.712595e+002	4200	38	8.477926e+000	0	0	0	0	0	0	4284.62	1	1	46.1809	37.9412
DATA	558	7	48	0	0	A_44_P317600	NM_012612	1632.22	219.75	1.707672e+002	1.744218e+001	216	37	7.435287e+000	0	0	0	0	0	0	154.695	1	1	45.1352	38.9535
DATA	559	7	49	0	0	A_64_P034166	A_64_P034166	1658	220	3.579816e+000	3.579235e+000	68	41	7.948468e+000	0	0	0	0	0	0	2.82097	0	0	65	41.9231
DATA	560	7	50	0	0	A_64_P024585	NM_001109337	1683.5	220	3.594188e+000	3.585571e+000	65	39	7.421635e+000	0	0	0	0	0	0	1.81629	0	0	54.1152	40.0857
DATA	561	7	51	0	0	A_42_P654682	NM_012724	1708.5	220	1.660352e+001	3.959446e+000	79.5	43	9.371690e+000	0	0	0	0	0	0	14.8622	1	0	65	44.1429
DATA	562	7	52	0	0	A_42_P524610	NM_001108992	1733.28	220.189	1.328929e+003	1.329419e+002	1198	40.5	5.643254e+000	0	0	0	0	0	0	1184.61	1	1	48.2044	40.3182
DATA	563	7	53	0	0	A_64_P046677	NM_020093	1759.77	219.699	1.390490e+001	3.883770e+000	76	38.5	5.883676e+000	0	0	0	0	0	0	12.3374	1	0	47.8731	38.4412
DATA	564	7	54	0	0	A_64_P042742	XM_001061779	1784.7	219.971	2.721429e+002	2.745696e+001	307	42.5	7.025002e+000	0	0	0	0	0	0	240.395	1	1	46.1809	42.2727
DATA	565	7	55	0	0	A_64_P058430	ENSRNOT00000062073	1810.54	219.957	2.624112e+001	4.503289e+000	90	42.5	6.876461e+000	0	0	0	0	0	0	23.0703	1	1	47.8731	40.7857
DATA	566	7	56	0	0	A_42_P479251	NM_001108686	1835.38	220	5.323678e+003	5.323805e+002	4616	42	9.383141e+000	0	0	0	0	0	0	4658.73	1	1	48.5334	43.28
DATA	567	7	57	0	0	A_42_P777329	NM_001106943	1861.17	220.352	4.018684e+002	4.035632e+001	419	43.5	9.522257e+000	0	0	0	0	0	0	349.961	1	1	47.5395	41.8125
DATA	568	7	58	0	0	A_64_P103414	NM_001106472	1886.5	220.352	6.003307e+000	3.761092e+000	68	43	7.957391e+000	0	0	0	0	0	0	5.20237	1	0	57.5363	41.8485
DATA	569	7	59	0	0	A_64_P082164	A_64_P082164	1911.84	219.985	8.895790e+001	9.646690e+000	141	40	6.874450e+000	0	0	0	0	0	0	76.7061	1	1	46.5243	38.4839
DATA	570	7	60	0	0	A_42_P702729	NM_001107557	1936.97	220.297	1.122606e+003	1.123233e+002	996	41.5	7.128562e+000	0	0	0	0	0	0	963.234	1	1	49.1849	40.8235
DATA	571	7	61	0	0	A_64_P130922	A_64_P130922	1962.39	219.871	3.693595e+002	3.712775e+001	388	39.5	1.097977e+001	0	0	0	0	0	0	315.317	1	1	47.2035	42.3462
DATA	572	7	62	0	0	A_42_P509843	NM_001100480	1988	220.455	5.252195e+002	5.265837e+001	508	41	1.313929e+001	0	0	0	0	0	0	446.118	1	1	55.8519	42.4444
DATA	573	7	63	0	0	A_64_P110759	A_64_P110759	2013.42	220.427	5.858093e+001	6.986565e+000	112	41	9.958992e+000	0	0	0	0	0	0	49.5074	1	1	57.5363	42.6286
DATA	574	7	64	0	0	A_64_P006235	A_64_P006235	2038.87	220.221	8.471946e+002	8.480583e+001	778	41	1.000718e+001	0	0	0	0	0	0	712.36	1	1	46.1809	43.1667
DATA	575	7	65	0	0	A_44_P506064	NM_001191778	2064.42	220.427	3.182374e+001	4.991694e+000	92	40	8.109321e+000	0	0	0	0	0	0	26.6253	1	1	57.5363	41.7586
DATA	576	7	66	0	0	A_64_P075425	A_64_P075425	2089.38	220.444	6.052651e+003	6.052775e+002	5109.5	39	8.377652e+000	0	0	0	0	0	0	5039.44	1	1	48.2044	38.7667
DATA	577	7	67	0	0	A_42_P544898	NM_001108279	2115	220.455	3.973873e+001	5.556329e+000	98	40	6.505581e+000	0	0	0	0	0	0	32.9244	1	1	55.8519	41.25
DATA	578	7	68	0	0	A_44_P837192	ENSRNOT00000038251	2140.33	220.608	2.746755e+001	4.771763e+000	86	42	9.961354e+000	0	0	0	0	0	0	22.6496	1	1	50.7771	42.1429
DATA	580	7	70	0	0	A_44_P325657	NM_001014007	2191.03	220.269	1.124502e+002	1.191466e+001	156	44	9.542662e+000	0	0	0	0	0	0	91.8744	1	1	45.835	43.2941
DATA	581	7	71	0	0	A_64_P004598	ENSRNOT00000024034	2216.29	220.156	3.577390e+002	3.599190e+001	354	40	9.459591e+000	0	0	0	0	0	0	291.004	1	1	49.5074	40
DATA	582	7	72	0	0	A_42_P607183	XM_001081723	2241.89	220.5	7.900583e+002	7.910562e+001	707	38	6.911735e+000	0	0	0	1	0	0	639.971	1	1	56.9804	38.8148
DATA	584	7	74	0	0	A_42_P589190	NM_023104	2292.16	220.39	6.840382e+002	6.852085e+001	601	41	7.962212e+000	0	0	0	0	0	0	549.8	1	1	49.8279	41.4444
DATA	585	7	75	0	0	A_42_P757323	TC587630	2318.13	220.474	1.610294e+003	1.610795e+002	1343	38	8.543117e+000	0	0	0	1	0	0	1289.56	1	1	50.1463	39.8788
DATA	586	7	76	0	0	A_42_P688320	NM_001108569	2343.11	220.662	1.530849e+002	1.583026e+001	187.5	39	8.235300e+000	0	0	0	0	0	0	122.197	1	1	47.8731	37.6571
DATA	587	7	77	0	0	A_44_P224705	NM_031002	2368.89	220.5	9.488808e+001	1.031436e+001	139	37.5	7.995152e+000	0	0	0	0	0	0	75.5079	1	1	56.9804	38.3235
DATA	588	7	78	0	0	A_42_P481849	NM_001100563	2394.25	220.587	9.978193e+002	9.986426e+001	839	40	1.010458e+001	0	0	0	1	0	0	791.869	1	1	48.8603	41.5556
DATA	589	7	79	66	1	DarkCorner	DarkCorner	2419.58	220.573	4.080306e+000	4.064054e+000	57	42	8.684962e+000	0	0	0	0	0	0	-6.95457	0	0	57.5363	42
DATA	590	7	80	66	1	DarkCorner	DarkCorner	2445.33	220.656	4.088722e+000	4.072437e+000	55	40	8.711999e+000	0	0	0	0	0	0	-7.82542	0	0	53.5237	43.0323
DATA	591	7	81	66	1	DarkCorner	DarkCorner	2470.42	220.573	4.095472e+000	4.079159e+000	60	39.5	7.181406e+000	0	0	0	0	0	0	-3.46015	0	0	65	38.8095
DATA	592	7	82	66	1	DarkCorner	DarkCorner	2496.2	220.683	4.100623e+000	4.084290e+000	58	43	8.292960e+000	0	0	0	0	0	0	-4.22399	0	0	43.7019	43.4688
DATA	593	7	83	66	1	DarkCorner	DarkCorner	2520.49	221.149	4.103618e+000	4.087273e+000	57.5	40.5	9.428261e+000	0	0	0	0	0	0	-5.08934	0	0	48.5334	42.45
DATA	594	7	84	66	1	DarkCorner	DarkCorner	2546.35	221.03	4.105212e+000	4.088861e+000	55	37	8.758488e+000	0	0	0	0	0	0	-6.90253	0	0	45.4864	40.4444
DATA	595	7	85	66	1	DarkCorner	DarkCorner	2572	220.545	4.104926e+000	4.088576e+000	57.5	38	6.831908e+000	0	0	0	0	0	0	-3.71337	0	0	65	38.0263
DATA	596	8	1	66	1	DarkCorner	DarkCorner	451.675	226.363	4.907132e+000	3.776609e+000	66	42	7.924365e+000	0	0	0	0	0	0	4.21642	1	0	50.7771	41.8507
DATA	597	8	2	66	1	DarkCorner	DarkCorner	477	226.704	3.742995e+000	3.745688e+000	65	43	6.441058e+000	0	0	0	0	0	0	3.23137	1	0	47.2035	42.9762
DATA	598	8	3	66	1	DarkCorner	DarkCorner	502.5	226.5	3.724512e+000	3.709677e+000	58	37	8.395176e+000	0	0	0	0	0	0	-2.80014	0	0	57.5363	38.5135
DATA	599	8	4	66	1	DarkCorner	DarkCorner	527.893	226.5	3.707297e+000	3.692530e+000	60	38	7.315923e+000	0	0	0	0	0	0	-2.60117	0	0	56.9804	37.9091
DATA	600	8	5	66	1	DarkCorner	DarkCorner	553.304	226.319	3.690420e+000	3.675721e+000	54	40	8.220102e+000	0	0	0	0	0	0	-7.53478	0	0	46.8651	40.5152
DATA	601	8	6	66	1	DarkCorner	DarkCorner	578.462	226.731	3.673637e+000	3.659004e+000	55	41	5.273975e+000	0	0	0	0	0	0	-4.15655	0	0	50.4627	40.7407
DATA	602	8	7	66	1	DarkCorner	DarkCorner	604.107	226.5	3.657258e+000	3.642691e+000	57	36	7.349015e+000	0	0	0	0	0	0	-4.1628	0	0	65	36.8529
DATA	603	8	8	0	0	A_44_P487081	NM_001033951	629.015	226.333	4.194318e+002	4.209972e+001	428	41	8.454758e+000	0	0	0	0	0	0	372.06	1	1	46.5243	40.7632
DATA	604	8	9	0	0	A_64_P054403	NM_001170340	654.897	226.462	3.147875e+002	3.168522e+001	340	43	8.094877e+000	0	0	0	0	0	0	280.461	1	1	50.1463	42.027
DATA	605	8	10	0	0	A_44_P665685	NM_001109325	679.823	226.354	1.556525e+001	3.918981e+000	73	37	6.735253e+000	0	0	0	0	0	0	13.9246	1	0	50.4627	36.3636
DATA	606	8	11	0	0	A_42_P531684	NM_001014215	705.75	226.553	1.182324e+002	1.235384e+001	165	36	7.629548e+000	0	0	0	0	0	0	106.211	1	1	49.5074	35.72
DATA	607	8	12	0	0	A_42_P722904	ENSRNOT00000006525	730.662	226.325	1.180357e+003	1.180896e+002	1100	39	8.082478e+000	0	0	0	1	0	0	1064.4	1	1	49.8279	38.6053
DATA	608	8	13	0	0	A_42_P514057	NM_031839	756.5	226.5	1.668454e+002	1.705892e+001	213	40	6.636390e+000	0	0	0	0	0	0	151.037	1	1	57.5363	38.3333
DATA	609	8	14	0	0	A_64_P087459	A_64_P087459	781.667	226.5	5.763467e+004	5.763468e+003	51225	38	7.327608e+000	0	0	0	0	0	0	52361.3	1	1	57.5363	39.0417
DATA	610	8	15	0	0	A_42_P581060	NM_001108722	807.056	226.389	5.910954e+003	5.911059e+002	5398	39	7.020787e+000	0	0	0	0	0	0	5388.66	1	1	48.2044	37.2647
DATA	611	8	16	0	0	A_42_P658220	NM_001109598	832.362	226.13	1.214271e+003	1.214781e+002	1128.5	39	8.696241e+000	0	0	0	0	0	0	1110.58	1	1	46.8651	38.2308
DATA	612	8	17	0	0	A_42_P758454	NM_001108101	857.921	226.566	1.269363e+002	1.316912e+001	179	38.5	8.510371e+000	0	0	0	0	0	0	116.466	1	1	49.1849	37.6563
DATA	613	8	18	0	0	A_64_P140956	NM_001013141	882.896	226.636	2.563371e+002	2.587110e+001	295.5	43	9.703133e+000	0	0	0	0	0	0	235.872	1	1	49.8279	43.1053
DATA	614	8	19	0	0	A_42_P508984	NM_001007729	908.582	226.573	1.748930e+002	1.783354e+001	219.5	36	8.690872e+000	0	0	0	0	0	0	161.373	1	1	57.5363	37.7813
DATA	615	8	20	0	0	A_42_P619008	NM_001013079	934.418	226.573	2.635923e+003	2.636153e+002	2438	43	6.744418e+000	0	0	0	0	0	0	2438.41	1	1	57.5363	42.2222
DATA	616	8	21	0	0	A_64_P058351	NM_017101	959.5	226.648	1.021536e+005	1.021536e+004	95104	47	1.364710e+001	0	0	0	0	0	0	94715.9	1	1	57.5363	50.08
DATA	617	8	22	0	0	A_64_P083800	XM_001058776	984.65	226.45	2.012561e+001	4.005367e+000	80.5	44	1.586895e+001	0	0	0	0	0	0	18.6988	1	1	51.0895	51.0968
DATA	618	8	23	0	0	A_64_P028088	NM_001106073	1009.95	226.534	3.568003e+002	3.584707e+001	394	37	5.858548e+000	0	0	0	0	0	0	332.13	1	1	48.5334	35.75
DATA	619	8	24	0	0	A_44_P105441	ENSRNOT00000042202	1035.63	226.488	7.799231e+003	7.799307e+002	7279	39	8.733751e+000	0	0	0	0	0	0	7272.12	1	1	52.3208	40.1818
DATA	620	8	25	0	0	A_42_P675802	NM_145777	1060.84	226.838	1.200616e+003	1.201110e+002	1145	44	7.533455e+000	0	0	0	0	0	0	1121.1	1	1	47.8731	43.8
DATA	621	8	26	0	0	A_64_P018525	ENSRNOT00000027134	1086.47	226.647	4.887233e+002	4.899336e+001	518.5	42.5	8.846087e+000	0	0	0	0	0	0	456.899	1	1	46.5243	44.4091
DATA	622	8	27	0	0	A_42_P749382	NM_001106731	1111.8	226.784	4.951085e+003	4.951204e+002	4672	39	1.320777e+001	0	0	0	0	0	0	4633.18	1	1	47.8731	43.1515
DATA	623	8	28	0	0	A_44_P316364	NM_001077675	1137.5	227	2.184247e+001	4.071237e+000	84	41	9.625218e+000	0	0	0	0	0	0	20.4554	1	1	54.1152	42.1
DATA	624	8	29	0	0	A_64_P143596	ENSRNOT00000060139	1162.79	226.806	1.100288e+002	1.152633e+001	163	40	1.164130e+001	0	0	0	0	0	0	103.089	1	1	47.5395	41.0417
DATA	625	8	30	0	0	A_42_P468723	NM_001191689	1188.07	226.8	3.150111e+002	3.168765e+001	354	42.5	1.069145e+001	0	0	0	0	0	0	295.214	1	1	46.8651	46.4167
DATA	626	8	31	0	0	A_42_P533792	NM_001106575	1213.38	226.816	6.076297e+003	6.076394e+002	5535	50	1.106087e+001	0	0	0	0	0	0	5694.45	1	1	48.8603	50
DATA	627	8	32	0	0	A_43_P16773	XM_217313	1238.79	226.806	3.210533e+002	3.228847e+001	366	49.5	7.506408e+000	0	0	0	0	0	0	300.805	1	1	47.5395	49.8846
DATA	628	8	33	0	0	A_42_P765830	NM_001106426	1264.17	227	8.196156e+003	8.196228e+002	7540	46	7.709695e+000	0	0	0	0	0	0	7675.65	1	1	46.8651	45.4242
DATA	629	8	34	0	0	A_43_P15073	ENSRNOT00000030771	1289.72	226.819	5.852703e+001	6.787911e+000	117	38	7.085156e+000	0	0	0	0	0	0	54.7695	1	1	47.5395	38.7407
DATA	630	8	35	0	0	A_42_P538527	NM_001108885	1314.72	226.905	1.976619e+002	2.006355e+001	240	42.5	7.368540e+000	0	0	0	0	0	0	184.797	1	1	48.8603	42.8462
DATA	631	8	36	0	0	A_64_P037130	A_64_P037130	1340.5	227	3.459455e+000	3.445676e+000	63	42	5.929068e+000	0	0	0	0	0	0	-0.316074	0	0	54.1152	43.3333
DATA	632	8	37	0	0	A_44_P536115	NM_023957	1365.73	226.643	2.074831e+003	2.075118e+002	1948.5	42	9.703878e+000	0	0	0	0	0	0	1934.62	1	1	46.8651	42.6296
DATA	633	8	38	0	0	A_43_P11800	NM_017059	1391	226.774	2.648795e+002	2.671251e+001	302	40	7.124435e+000	0	0	0	0	0	0	246.571	1	1	45.4864	38.8485
DATA	634	8	39	0	0	A_64_P004922	NM_001191924	1416.44	227.027	1.612936e+003	1.613307e+002	1473	39	8.192137e+000	0	0	0	0	0	0	1498.62	1	1	48.5334	39
DATA	635	8	40	0	0	A_64_P145058	NM_001107951	1441.61	226.853	4.861795e+002	4.874165e+001	517	40	9.593146e+000	0	0	0	0	0	0	450.765	1	1	48.8603	41.8421
DATA	636	8	41	0	0	A_64_P075372	A_64_P075372	1467.5	227.352	2.514776e+001	4.292317e+000	88	39	9.501595e+000	0	0	0	0	0	0	23.261	1	1	57.5363	39.697
DATA	637	8	42	0	0	A_64_P118792	NM_001107034	1492.58	227.427	2.297369e+001	4.176026e+000	87	41	8.720977e+000	0	0	0	0	0	0	21.1964	1	1	57.5363	42.5938
DATA	638	8	43	0	0	A_42_P469685	NM_001100532	1518.19	227.233	1.723001e+003	1.723356e+002	1652	42	8.509807e+000	0	0	0	0	0	0	1585.23	1	1	48.2044	41.2286
DATA	639	8	44	0	0	A_42_P759822	NM_001109673	1543.58	227.427	2.701296e+002	2.723973e+001	316	39	8.529143e+000	0	0	0	0	0	0	247.793	1	1	57.5363	41.2051
DATA	640	8	45	0	0	A_64_P014687	NM_012650	1569	226.774	9.569455e+003	9.569519e+002	9049	42	8.791568e+000	0	0	0	0	0	0	8749.79	1	1	45.4864	40.6667
DATA	641	8	46	0	0	A_43_P18505	NM_001012010	1594.42	227.427	5.403149e+001	6.454422e+000	111	39	8.122130e+000	0	0	0	0	0	0	49.2393	1	1	57.5363	39.5349
DATA	642	8	47	0	0	A_43_P12580	NM_031548	1619.58	227.427	1.935374e+002	1.967539e+001	235	40	8.606067e+000	0	0	0	0	0	0	175.751	1	1	57.5363	39.4242
DATA	643	8	48	0	0	A_64_P052980	NM_001014786	1645.33	227.5	2.071438e+001	4.115822e+000	81.5	39	8.809500e+000	0	0	0	0	0	0	18.7397	1	1	65	40.8462
DATA	644	8	49	0	0	A_64_P397764	ENSRNOT00000028709	1670.41	227.473	3.441273e+002	3.459744e+001	372	41	8.612337e+000	0	0	0	0	0	0	310.123	1	1	49.1849	42.7879
DATA	645	8	50	0	0	A_64_P048408	NM_001008858	1695.84	227.233	8.059377e+001	8.820727e+000	138	39	9.547937e+000	0	0	0	0	0	0	72.334	1	1	47.8731	40.5588
DATA	647	8	52	0	0	A_64_P059500	ENSRNOT00000043917	1746.4	226.985	1.471109e+001	3.903482e+000	77	41	6.680978e+000	0	0	0	0	0	0	13.0911	1	0	45.4864	42.2759
DATA	648	8	53	0	0	A_64_P220198	AW917371	1772.33	227.5	1.329526e+001	3.867755e+000	77	39	8.212893e+000	0	0	0	0	0	0	11.7778	1	0	57.5363	40.4194
DATA	649	8	54	0	0	A_64_P109764	NM_001007756	1797.58	227.272	2.992769e+002	3.014930e+001	335	44	6.839041e+000	0	0	0	0	0	0	263.906	1	1	51.0895	43.5714
DATA	650	8	55	0	0	A_64_P142685	NM_001130498	1822.89	227.5	2.055705e+001	4.202851e+000	85	40	6.934574e+000	0	0	0	0	0	0	18.0432	1	1	56.9804	40.3704
DATA	651	8	56	0	0	A_44_P395709	NM_134366	1847.74	227.222	1.186072e+003	1.186644e+002	1097	40.5	1.196705e+001	0	0	0	0	0	0	1036.14	1	1	47.5395	41.6071
DATA	652	8	57	0	0	A_64_P165071	NM_001110165	1873.57	227.392	5.674962e+003	5.675083e+002	4926.5	41	8.196380e+000	0	0	0	0	0	0	4933.22	1	1	49.1849	40.7742
DATA	653	8	58	0	0	A_64_P009147	ENSRNOT00000042587	1899.11	227.703	3.977321e+001	5.445579e+000	96	39	7.886647e+000	0	0	0	0	0	0	34.4047	1	1	48.8603	39.4722
DATA	654	8	59	0	0	A_42_P647072	NM_178102	1924.38	227.556	9.260599e+002	9.268141e+001	866.5	42	8.019409e+000	0	0	0	0	0	0	797.093	1	1	48.2044	40.5714
DATA	655	8	60	0	0	A_64_P125585	XM_001063000	1949.89	227.5	1.610290e+001	4.087556e+000	77	40	1.011907e+001	0	0	0	0	0	0	13.7906	1	0	56.9804	40.1071
DATA	656	8	61	0	0	A_42_P610317	NM_001108225	1974.93	227.282	4.338487e+003	4.338651e+002	3594.5	38	8.819007e+000	0	0	0	0	0	0	3697.02	1	1	47.2035	38.1818
DATA	657	8	62	0	0	A_42_P755831	NM_152935	2000.51	227.411	1.274122e+004	1.274128e+003	10727.5	42	1.094717e+001	0	0	0	0	0	0	10802.5	1	1	48.5334	42.0741
DATA	659	8	64	0	0	A_44_P386375	NM_053842	2051.4	227.521	4.819851e+002	4.835070e+001	471	40	9.687152e+000	0	0	0	0	0	0	404.562	1	1	48.5334	42.8182
DATA	660	8	65	0	0	A_43_P15565	NM_023953	2076.86	227.634	1.956258e+001	4.320576e+000	82	40	9.181252e+000	0	0	0	0	0	0	16.3389	1	1	47.5395	41.8462
DATA	661	8	66	0	0	A_42_P456701	NM_001009697	2102.11	227.648	6.351392e+002	6.363178e+001	580	37	7.999538e+000	0	0	0	0	0	0	527.901	1	1	47.8731	36.7241
DATA	662	8	67	0	0	A_43_P20388	ENSRNOT00000061333	2127.38	227.763	6.704301e+002	6.715575e+001	603	41	7.287151e+000	0	0	0	0	0	0	554.576	1	1	49.1849	39.4444
DATA	663	8	68	0	0	A_44_P572504	TC585660	2152.6	227.853	3.866279e+002	3.885979e+001	379	40	7.458992e+000	0	0	0	0	0	0	318.325	1	1	48.8603	39.6452
DATA	664	8	69	0	0	A_64_P059964	NM_001013858	2178.32	227.32	1.761175e+003	1.761613e+002	1462	42	8.649531e+000	0	0	0	0	0	0	1443.23	1	1	48.8603	42.5758
DATA	665	8	70	0	0	A_44_P1056293	ENSRNOT00000022862	2203.51	227.427	1.706432e+003	1.706887e+002	1450	40	9.304658e+000	0	0	0	0	0	0	1392.21	1	1	49.1849	41.08
DATA	666	8	71	0	0	A_64_P133276	NM_001107464	2229.12	227.527	4.814302e+002	4.830567e+001	456	39.5	7.247750e+000	0	0	0	0	0	0	391.086	1	1	48.8603	38.5667
DATA	667	8	72	0	0	A_42_P667782	NM_001009673	2254.19	227.471	6.836024e+002	6.847582e+001	598.5	39.5	1.197045e+001	0	0	0	0	0	0	553.064	1	1	45.835	41.875
DATA	668	8	73	0	0	A_64_P023624	A_64_P023624	2279.64	227.788	2.484128e+002	2.516007e+001	261	37	8.920558e+000	0	0	0	0	0	0	200.197	1	1	45.835	37.8276
DATA	669	8	74	0	0	A_64_P110130	NM_001106172	2305.32	228	7.550892e+002	7.561518e+001	678	36.5	9.414942e+000	0	0	0	0	0	0	606.277	1	1	49.1849	38.4375
DATA	670	8	75	0	0	A_64_P087728	XM_001078778	2330.5	228	1.444937e+002	1.499841e+001	177	39.5	8.198402e+000	0	0	0	0	0	0	115.622	1	1	54.1152	40.6
DATA	671	8	76	0	0	A_44_P475356	NM_001177823	2356.21	228.093	1.321535e+002	1.381729e+001	167.5	38.5	8.188945e+000	0	0	0	0	0	0	105.409	1	1	48.2044	38.1765
DATA	672	8	77	0	0	A_42_P560984	NM_001109179	2381.38	228	5.591240e+003	5.591386e+002	4331	40	1.046092e+001	0	0	0	0	0	0	4446.99	1	1	48.5334	42.3913
DATA	673	8	78	0	0	A_42_P566906	NM_001006966	2406.68	228.027	1.417041e+003	1.417621e+002	1194	39	9.363656e+000	0	0	0	0	0	0	1124.18	1	1	49.1849	40.7037
DATA	674	8	79	66	1	DarkCorner	DarkCorner	2432.26	228.591	4.080774e+000	4.064520e+000	56	42	7.031719e+000	0	0	0	0	0	0	-6.48735	0	0	45.1352	42.8485
DATA	675	8	80	66	1	DarkCorner	DarkCorner	2456.63	227.958	4.088356e+000	4.072072e+000	55	39	8.583059e+000	0	0	0	0	0	0	-6.02242	0	0	47.8731	39.0857
DATA	676	8	81	66	1	DarkCorner	DarkCorner	2483.39	228.069	4.094588e+000	4.078279e+000	55	40	7.285647e+000	0	0	0	0	0	0	-3.85787	0	0	65	39.375
DATA	677	8	82	66	1	DarkCorner	DarkCorner	2509.03	228.029	4.098845e+000	4.082519e+000	59	42	6.791355e+000	0	0	0	0	0	0	-3.56329	0	0	46.8651	42.7407
DATA	678	8	83	66	1	DarkCorner	DarkCorner	2533.39	228.143	4.101082e+000	4.084747e+000	58	41	8.056467e+000	0	0	0	0	0	0	-4.92216	0	0	42.9674	41.64
DATA	679	8	84	66	1	DarkCorner	DarkCorner	2559.5	228.352	4.101443e+000	4.085107e+000	55	42.5	8.787542e+000	0	0	0	0	0	0	-7.12319	0	0	57.5363	40.9643
DATA	680	8	85	66	1	DarkCorner	DarkCorner	2584.58	228.427	4.099800e+000	4.083810e+000	62	34.5	8.099803e+000	0	0	0	0	0	0	0.414826	0	0	57.5363	34.9011
DATA	681	9	1	66	1	DarkCorner	DarkCorner	438.75	233.357	8.493390e+000	3.843392e+000	67	42	1.084280e+001	0	0	0	0	0	0	7.29053	1	0	51.7088	43.3968
DATA	682	9	2	66	1	DarkCorner	DarkCorner	464.188	233.512	3.745841e+000	3.730921e+000	60	42	8.212829e+000	0	0	0	0	0	0	-0.63023	0	0	51.0895	41.0725
DATA	683	9	3	66	1	DarkCorner	DarkCorner	489.582	233.573	1.019844e+001	4.032414e+000	63	40.5	8.133401e+000	0	0	0	0	0	0	8.83591	1	0	57.5363	39.0938
DATA	684	9	4	66	1	DarkCorner	DarkCorner	515.737	233.895	3.710661e+000	3.695882e+000	58	38	1.196872e+001	0	0	0	0	0	0	-2.89632	0	0	49.1849	41.186
DATA	685	9	5	66	1	DarkCorner	DarkCorner	540.582	233.573	3.694315e+000	3.679600e+000	57	39.5	9.896046e+000	0	0	0	0	0	0	-4.23757	0	0	57.5363	40.4737
DATA	686	9	6	66	1	DarkCorner	DarkCorner	565.765	233.868	3.677603e+000	3.662955e+000	57.5	39	4.995236e+000	0	0	0	0	0	0	-4.38905	0	0	46.1809	39
DATA	687	9	7	66	1	DarkCorner	DarkCorner	591.418	233.573	3.661250e+000	3.646667e+000	57	37	7.103829e+000	0	0	0	0	0	0	-3.99403	0	0	65	37.1852
DATA	688	9	8	0	0	A_44_P195306	NM_019377	616.543	233.614	1.387411e+004	1.387415e+003	12072.5	37	9.211816e+000	0	0	0	0	0	0	12294.6	1	1	47.5395	37.3704
DATA	689	9	9	0	0	A_44_P653240	NM_001202552	641.955	233.788	4.356870e+002	4.371843e+001	443	42	8.229399e+000	0	0	0	0	0	0	387.76	1	1	45.835	42.1389
DATA	690	9	10	0	0	A_64_P012778	ENSRNOT00000038310	667.671	233.976	7.476400e+000	3.676609e+000	68	41	6.721205e+000	0	0	0	0	0	0	6.68245	1	0	51.0895	40.7143
DATA	691	9	11	0	0	A_43_P11430	NM_001130503	692.79	234.065	3.605677e+002	3.623458e+001	384.5	38	7.787050e+000	0	0	0	0	0	0	323.584	1	1	45.4864	37.2941
DATA	692	9	12	0	0	A_44_P225353	NM_001009678	717.859	233.775	3.055207e+002	3.076011e+001	321.5	39	9.245494e+000	0	0	0	0	0	0	275.244	1	1	47.5395	38.6667
DATA	693	9	13	0	0	A_64_P055231	NM_001106620	743.6	233.643	5.869271e+002	5.880044e+001	598	39.5	7.145428e+000	0	0	0	0	0	0	530.804	1	1	47.2035	38.1667
DATA	694	9	14	0	0	A_42_P540950	NM_001009541	769.042	233.746	6.162115e+002	6.172301e+001	618.5	38	6.513344e+000	0	0	0	0	0	0	559.348	1	1	46.8651	38.069
DATA	695	9	15	0	0	A_64_P135888	ENSRNOT00000029916	794.145	233.516	3.546539e+000	3.549555e+000	63.5	41	6.311966e+000	0	0	0	0	0	0	3.17357	0	0	43.7019	40.1818
DATA	696	9	16	0	0	A_64_P086448	NM_001008819	819.775	233.775	7.732572e+001	8.496221e+000	135	38	7.857128e+000	0	0	0	0	0	0	70.6732	1	1	46.8651	37.1714
DATA	697	9	17	0	0	A_42_P701779	NM_001108048	844.929	234	1.354628e+003	1.355082e+002	1263	35	8.235512e+000	0	0	0	0	0	0	1242.02	1	1	46.8651	35.0968
DATA	698	9	18	0	0	A_44_P409965	ENSRNOT00000036078	870.265	234.088	3.517706e+001	4.961397e+000	96	37	6.342045e+000	0	0	0	0	0	0	32.3495	1	1	45.835	36.3077
DATA	699	9	19	0	0	A_44_P474037	NM_052807	896	234	1.270418e+002	1.317454e+001	180	38	7.269907e+000	0	0	0	0	0	0	117.161	1	1	54.9904	39.8718
DATA	700	9	20	0	0	A_64_P156985	NM_001000385	921.5	234	3.493672e+000	3.480294e+000	62	39	7.401319e+000	0	0	0	0	0	0	0.565292	0	0	54.1152	38.6316
DATA	701	9	21	0	0	A_42_P635228	NM_001107651	946.608	234.069	5.729221e+001	6.698896e+000	114.5	42	5.029164e+000	0	0	0	0	0	0	53.1007	1	1	53.8203	42.7391
DATA	702	9	22	0	0	A_64_P240508	ENSRNOT00000018000	972.5	234	1.768918e+002	1.802511e+001	226	44	1.323422e+001	0	0	0	0	0	0	164.315	1	1	65	49.2308
DATA	703	9	23	0	0	A_64_P026509	NM_020656	997.5	234	4.115617e+001	5.374902e+000	101	38	8.701016e+000	0	0	0	0	0	0	38.3044	1	1	65	38.3214
DATA	704	9	24	0	0	A_42_P570241	NM_177928	1022.84	233.836	2.996079e+002	3.015889e+001	338	37	6.513077e+000	0	0	0	0	0	0	279.331	1	1	46.1809	37.1429
DATA	706	9	26	0	0	A_64_P032893	TC597420	1073.48	234.147	2.337845e+004	2.337848e+003	22063	48	1.100954e+001	0	0	0	0	0	0	21858.5	1	1	49.8279	46.72
DATA	707	9	27	0	0	A_64_P043605	NM_001024799	1098.6	234.147	2.595821e+003	2.596048e+002	2371	43	1.060653e+001	0	0	0	0	0	0	2429.62	1	1	48.8603	46.037
DATA	708	9	28	0	0	A_64_P095890	NM_019337	1124.67	234.189	8.147555e+003	8.147627e+002	7406	43.5	1.046687e+001	0	0	0	0	0	0	7632.44	1	1	52.6241	43.1563
DATA	709	9	29	0	0	A_42_P513145	NM_001107288	1150	233.588	2.404268e+002	2.428652e+001	286	42	1.002878e+001	0	0	0	0	0	0	225.348	1	1	45.4864	40.8276
DATA	710	9	30	0	0	A_64_P122317	NM_001108031	1175.25	234.026	8.489025e+001	9.156340e+000	139	44	1.535514e+001	0	0	0	0	0	0	79.5971	1	1	49.1849	49.0303
DATA	711	9	31	0	0	A_64_P065492	NM_001109101	1200.63	234.24	2.860848e+001	4.467253e+000	92	44.5	9.732183e+000	0	0	0	0	0	0	26.8282	1	1	49.1849	46.95
DATA	712	9	32	0	0	A_64_P129273	NM_001105871	1226.42	234.427	3.724959e+001	5.064576e+000	99.5	45.5	1.093140e+001	0	0	0	0	0	0	34.9276	1	1	57.5363	48.2333
DATA	713	9	33	0	0	A_64_P050748	NM_181824	1251.58	234.427	3.258085e+001	4.732694e+000	93	48	6.074726e+000	0	0	0	0	0	0	30.5386	1	1	57.5363	48.1667
DATA	714	9	34	0	0	A_42_P689755	NM_053306	1277	234.455	4.917069e+001	5.997934e+000	108	41	7.874128e+000	0	0	0	0	0	0	46.0605	1	1	55.8519	40.7576
DATA	715	9	35	0	0	A_64_P039586	TC635481	1302.06	234.314	1.233359e+002	1.280372e+001	178	39	7.764388e+000	0	0	0	0	0	0	115.437	1	1	46.8651	39
DATA	716	9	36	0	0	A_64_P083474	NM_001134731	1327.5	234.289	4.676000e+003	4.676126e+002	4321	42	1.093488e+001	0	0	0	0	0	0	4371.74	1	1	49.1849	42.0938
DATA	718	9	38	0	0	A_42_P763553	NM_001107486	1378.56	233.871	8.559673e+001	9.229366e+000	143	43	8.528029e+000	0	0	0	0	0	0	79.7927	1	1	47.5395	44
DATA	719	9	39	0	0	A_44_P151513	NM_001000901	1403.89	234.5	3.471379e+000	3.457552e+000	62	38	7.501971e+000	0	0	0	0	0	0	-2.09085	0	0	56.9804	39.2903
DATA	720	9	40	0	0	A_42_P460204	ENSRNOT00000020886	1428.81	234.343	2.675111e+002	2.697452e+001	306.5	40.5	9.030191e+000	0	0	0	0	0	0	248.444	1	1	47.2035	40.9375
DATA	721	9	41	0	0	A_44_P218147	NM_001013432	1454.67	234.5	2.552372e+001	4.309471e+000	86	41	9.903817e+000	0	0	0	0	0	0	23.6508	1	1	57.5363	40.4324
DATA	722	9	42	0	0	A_42_P554722	NM_001099758	1479.92	234.592	3.909973e+003	3.910128e+002	3639.5	39	9.881133e+000	0	0	0	0	0	0	3614.24	1	1	49.1849	40.4667
DATA	723	9	43	0	0	A_44_P135450	XM_223143	1505.5	234.5	1.888873e+002	1.920848e+001	237.5	41	8.481374e+000	0	0	0	0	0	0	174.13	1	1	57.5363	41.3939
DATA	724	9	44	0	0	A_64_P107329	NM_001013207	1530.63	234.5	5.003783e+003	5.003905e+002	4593.5	39	9.247155e+000	0	0	0	0	0	0	4599.7	1	1	49.8279	42.381
DATA	725	9	45	0	0	A_64_P116219	NM_001004085	1555.87	234.229	8.931266e+003	8.931335e+002	8016	43	8.776592e+000	0	0	0	0	0	0	8184.75	1	1	46.5243	41.9714
DATA	726	9	46	0	0	A_44_P147396	NM_001191744	1581.18	234.806	2.353317e+001	4.236115e+000	86	41	8.374746e+000	0	0	0	0	0	0	21.4969	1	1	47.5395	41
DATA	727	9	47	0	0	A_44_P975743	TC626448	1606.56	234.397	1.093209e+003	1.093780e+002	1007.5	40	8.685767e+000	0	0	0	0	0	0	995.131	1	1	50.1463	39.9063
DATA	728	9	48	0	0	A_42_P728472	NM_001007600	1632.11	234.352	8.741459e+003	8.741531e+002	7858	39	9.747950e+000	0	0	0	0	0	0	7928.08	1	1	47.8731	40.7568
DATA	729	9	49	0	0	A_64_P130139	NM_013181	1657.59	234.579	7.818891e+003	7.818972e+002	6952.5	40	1.018963e+001	0	0	0	0	0	0	7064.4	1	1	49.5074	43.3714
DATA	730	9	50	0	0	A_42_P481087	XM_232226	1682.97	234.753	5.758449e+002	5.769538e+001	576	39.5	7.703276e+000	0	0	0	0	0	0	518.222	1	1	47.5395	39.5882
DATA	731	9	51	0	0	A_44_P102465	NM_001000424	1708.58	234.573	4.350941e+001	5.640979e+000	103	41	9.174672e+000	0	0	0	0	0	0	38.9922	1	1	57.5363	42.2143
DATA	732	9	52	0	0	A_64_P082557	ENSRNOT00000029274	1734	234.545	1.375699e+001	3.859186e+000	76	43.5	7.866678e+000	0	0	0	0	0	0	12.2761	1	0	65	42.7308
DATA	733	9	53	0	0	A_64_P064873	XM_228599	1759.5	234.648	3.120307e+001	4.780419e+000	94	41	7.375995e+000	0	0	0	0	0	0	27.7214	1	1	57.5363	41.303
DATA	734	9	54	0	0	A_64_P042298	A_64_P042298	1784.58	234.573	7.235088e+001	8.098183e+000	130	42	6.725594e+000	0	0	0	0	0	0	63.9908	1	1	57.5363	41.1852
DATA	735	9	55	0	0	A_44_P286341	ENSRNOT00000038519	1810.06	234.577	1.037607e+001	3.799255e+000	72.5	43.5	9.025443e+000	0	0	0	0	0	0	9.13455	1	0	48.2044	43.3
DATA	736	9	56	0	0	A_44_P994614	NM_001106646	1835.44	234.468	2.184961e+004	2.184964e+003	18562.5	39	6.999918e+000	0	0	0	0	0	0	19144.3	1	1	49.8279	38.0333
DATA	737	9	57	0	0	A_64_P098354	XM_001066867	1861.09	234.614	1.305615e+002	1.356759e+001	176	44	9.124248e+000	0	0	0	0	0	0	113.842	1	1	57.259	42.2424
DATA	738	9	58	0	0	A_64_P117373	NM_001107752	1886.07	235.059	6.567077e+001	7.541453e+000	120	38.5	7.255073e+000	0	0	0	0	0	0	56.9886	1	1	46.8651	39.5938
DATA	739	9	59	0	0	A_64_P111395	ENSRNOT00000025391	1911.88	234.961	2.216298e+002	2.247407e+001	250.5	40	6.975240e+000	0	0	0	0	0	0	191.363	1	1	48.2044	39.4444
DATA	740	9	60	0	0	A_64_P059465	XM_229201	1936.99	235.071	4.048110e+000	3.766620e+000	67	42	9.383355e+000	0	0	0	0	0	0	3.47811	1	0	46.8651	40.8788
DATA	741	9	61	0	0	A_64_P010852	NM_001106214	1962.61	234.732	1.111110e+004	1.111116e+003	9225.5	40	1.112460e+001	0	0	0	0	0	0	9498.08	1	1	47.5395	41.44
DATA	742	9	62	0	0	A_64_P024967	NM_001008359	1988.15	234.797	7.739179e+001	8.614291e+000	129.5	36	8.186125e+000	0	0	0	0	0	0	65.8231	1	1	47.5395	36.5667
DATA	743	9	63	0	0	A_44_P278418	NM_012538	2013.34	235.189	9.766517e+000	3.925218e+000	71	40	7.108075e+000	0	0	0	0	0	0	8.26559	1	0	48.2044	40.4839
DATA	744	9	64	0	0	A_44_P821875	NM_001009500	2038.56	234.955	2.695142e+001	4.675732e+000	89	38	1.168328e+001	0	0	0	0	0	0	22.6958	1	1	45.4864	43.0323
DATA	745	9	65	0	0	A_64_P066737	A_64_P066737	2064.26	234.786	4.418850e+001	5.854320e+000	97	38.5	8.260138e+000	0	0	0	0	0	0	37.0237	1	1	46.8651	39.6667
DATA	746	9	66	0	0	A_64_P003943	TC616650	2089.67	235.25	5.060623e+001	6.364055e+000	107	37.5	7.767897e+000	0	0	0	0	0	0	42.1947	1	1	47.5395	38.0667
DATA	747	9	67	0	0	A_64_P047035	ENSRNOT00000066263	2114.98	234.936	7.307133e+000	3.945984e+000	71	38	7.477476e+000	0	0	0	0	0	0	6.06302	1	0	45.4864	38.1333
DATA	748	9	68	0	0	A_64_P113867	NM_001077201	2140.31	235.014	2.495415e+002	2.525648e+001	268	39.5	6.465559e+000	0	0	0	0	0	0	206.077	1	1	47.2035	38.3
DATA	749	9	69	0	0	A_64_P013758	NM_012582	2166.15	234.893	9.593358e+002	9.601342e+001	860	39.5	7.603689e+000	0	0	0	0	0	0	788.492	1	1	50.1463	38.6667
DATA	750	9	70	0	0	A_44_P303982	NM_001106381	2191.14	235.242	3.804138e+001	5.470977e+000	94.5	44	9.670707e+000	0	0	0	0	0	0	31.1294	1	1	45.835	43.4516
DATA	751	9	71	0	0	A_64_P048601	A_64_P048601	2216.24	235	4.105328e+002	4.124278e+001	387	41	6.870556e+000	0	0	0	0	0	0	334.484	1	1	46.8651	39.2727
DATA	752	9	72	0	0	A_44_P304880	NM_001014261	2241.92	234.742	6.753684e+001	7.832060e+000	118.5	39	1.140579e+001	0	0	0	0	0	0	54.7913	1	1	45.835	40.2778
DATA	753	9	73	0	0	A_64_P096767	ENSRNOT00000039549	2267.82	235.386	3.997831e+000	3.981907e+000	60	34	8.755361e+000	0	0	0	0	0	0	-1.8976	0	0	52.6241	37.0278
DATA	754	9	74	0	0	A_43_P21810	NM_001025000	2292.79	235.288	1.960039e+001	4.451547e+000	78	36	7.159307e+000	0	0	0	0	0	0	15.7787	1	0	45.4864	36.5455
DATA	756	9	76	0	0	A_64_P084976	NM_001008916	2343.71	235.667	4.040272e+000	4.024179e+000	61	39	8.123161e+000	0	0	0	0	0	0	-2.13958	0	0	48.2044	38.8824
DATA	757	9	77	0	0	A_64_P040004	XM_001054754	2368.74	234.778	1.935673e+003	1.936094e+002	1594.5	38.5	9.643055e+000	0	0	0	0	0	0	1542.91	1	1	47.2035	39.3333
DATA	758	9	78	0	0	A_64_P156785	XM_001058828	2394.42	235.427	6.485744e+000	4.098975e+000	68	40	9.811262e+000	0	0	0	0	0	0	5.15597	1	0	57.5363	41.5217
DATA	759	9	79	0	0	A_64_P123914	XM_217505	2419.51	235.37	1.572154e+004	1.572159e+003	12175	42	8.757283e+000	0	0	0	0	0	0	12468.7	1	1	48.5334	42.24
DATA	760	9	80	66	1	DarkCorner	DarkCorner	2445	235.628	4.081271e+000	4.065015e+000	51	43	7.930451e+000	0	0	0	0	0	0	-9.42128	0	0	52.3208	42.2727
DATA	761	9	81	66	1	DarkCorner	DarkCorner	2470.42	235.427	4.088087e+000	4.071804e+000	58.5	36	8.518345e+000	0	0	0	0	0	0	-4.21501	0	0	57.5363	37.2927
DATA	762	9	82	66	1	DarkCorner	DarkCorner	2495.67	235.5	4.093079e+000	4.076776e+000	59	41.5	6.880405e+000	0	0	0	0	0	0	-4.30349	0	0	57.5363	41.8947
DATA	763	9	83	66	1	DarkCorner	DarkCorner	2521.42	235.427	1.348845e+001	4.297302e+000	70	41	8.719922e+000	0	0	0	0	0	0	10.6368	1	0	57.5363	39.963
DATA	764	9	84	66	1	DarkCorner	DarkCorner	2546.58	235.427	4.097816e+000	4.081495e+000	54	43	8.098623e+000	0	0	0	0	0	0	-5.2177	0	0	57.5363	41.6563
DATA	765	9	85	66	1	DarkCorner	DarkCorner	2572	235.455	4.097195e+000	4.080875e+000	61	39.5	6.204550e+000	0	0	0	0	0	0	-1.31878	0	0	55.8519	39.4412
DATA	766	10	1	66	1	DarkCorner	DarkCorner	450.957	241.362	3.749192e+000	3.742315e+000	65	40	8.315104e+000	0	0	0	0	0	0	2.11462	0	0	46.1809	40.2921
DATA	767	10	2	66	1	DarkCorner	DarkCorner	477.093	241.065	3.731778e+000	3.716914e+000	60	41.5	8.398825e+000	0	0	0	0	0	0	-0.144088	0	0	54.4085	41.0714
DATA	768	10	3	66	1	DarkCorner	DarkCorner	502.4	241.031	3.714845e+000	3.702392e+000	61	41	1.260539e+001	0	0	0	0	0	0	1.14548	0	0	45.1352	41.907
DATA	769	10	4	66	1	DarkCorner	DarkCorner	527.907	241.065	3.697901e+000	3.683172e+000	58	39	1.082796e+001	0	0	0	0	0	0	-1.63165	0	0	54.4085	40.2432
DATA	770	10	5	66	1	DarkCorner	DarkCorner	553.629	241.258	3.680946e+000	3.666285e+000	56	39.5	9.377078e+000	0	0	0	0	0	0	-5.96367	0	0	44.4243	40.4474
DATA	771	10	6	66	1	DarkCorner	DarkCorner	578.5	241.352	3.664883e+000	3.650286e+000	56	42	5.660389e+000	0	0	0	0	0	0	-3.38154	0	0	57.5363	40.04
DATA	772	10	7	0	0	A_64_P139937	XM_001070013	604.088	241.386	3.648719e+000	3.634186e+000	60	42	9.281603e+000	0	0	0	0	0	0	-1.33154	0	0	57.259	39.9259
DATA	773	10	8	0	0	A_44_P185613	XM_001080030	629.394	241.225	3.824091e+001	5.264876e+000	96	38	8.663240e+000	0	0	0	0	0	0	34.001	1	1	47.5395	40.1379
DATA	774	10	9	0	0	A_42_P738520	NM_001007746	654.7	241.1	6.851546e+002	6.861017e+001	649	40	6.742100e+000	0	0	0	1	0	0	611.737	1	1	47.2035	40.5484
DATA	775	10	10	66	-1	(-)3xSLv1	NegativeControl	679.929	241.696	3.603053e+000	3.588702e+000	58	40	8.158905e+000	0	0	0	0	0	0	-4.34792	0	0	42.2201	39.9118
DATA	776	10	11	0	0	A_42_P626023	NM_001107265	705.582	241.427	2.815970e+002	2.838566e+001	321	40	1.109531e+001	0	0	0	0	0	0	253.479	1	1	57.5363	41.9655
DATA	777	10	12	0	0	A_43_P11120	XR_085824	731	241.455	1.500113e+003	1.500536e+002	1423.5	41	1.026064e+001	0	0	0	0	0	0	1355.54	1	1	55.8519	41.8529
DATA	778	10	13	0	0	A_42_P473425	NM_138844	756.319	240.899	4.634475e+001	5.836524e+000	105	40	5.833397e+000	0	0	0	0	0	0	42.0306	1	1	46.5243	38.1765
DATA	779	10	14	0	0	A_44_P692981	ENSRNOT00000007422	781.708	241.138	3.086388e+001	4.692792e+000	90	38	6.283883e+000	0	0	0	0	0	0	28.0916	1	1	45.835	38.8889
DATA	780	10	15	0	0	A_64_P102366	A_64_P102366	806.914	241.657	2.342190e+001	4.230438e+000	81.5	41	7.126105e+000	0	0	0	0	0	0	21.3916	1	1	46.8651	40.4615
DATA	781	10	16	0	0	A_42_P616287	NM_001134555	832.375	241.125	9.903221e+001	1.050742e+001	153.5	35	8.159696e+000	0	0	0	0	0	0	90.7358	1	1	44.7812	34.75
DATA	782	10	17	0	0	A_64_P073995	XM_001081370	858	241.455	2.061147e+001	4.062461e+000	79	38	1.155673e+001	0	0	0	0	0	0	18.9438	1	1	55.8519	38.1714
DATA	783	10	18	0	0	A_42_P595381	NM_001107258	883.171	241.553	1.676104e+003	1.676467e+002	1583	41	8.879997e+000	0	0	0	0	0	0	1544.9	1	1	49.8279	42.0811
DATA	784	10	19	0	0	A_42_P462205	NM_001007745	908.311	241.662	2.620334e+003	2.620565e+002	2367.5	39	9.521905e+000	0	0	0	0	0	0	2421.67	1	1	48.5334	40
DATA	785	10	20	0	0	A_64_P016102	A_64_P016102	934.333	241.5	2.954118e+001	4.559211e+000	87.5	41	8.027539e+000	0	0	0	0	0	0	27.3705	1	1	65	41.2
DATA	786	10	21	0	0	A_64_P017829	NM_001128216	959.5	241.5	3.924023e+000	3.487028e+000	64	44	8.360220e+000	0	0	0	0	0	0	3.64388	1	0	65	44.4348
DATA	787	10	22	0	0	A_64_P090244	NM_001127449	984.893	241.5	1.276376e+005	1.276376e+004	119429	41.5	1.392605e+001	0	0	0	0	0	0	118770	1	1	56.9804	44.25
DATA	788	10	23	0	0	A_42_P503626	NM_001044247	1010.5	241.5	3.180730e+001	4.693467e+000	91.5	36.5	4.801442e+000	0	0	0	0	0	0	29.6526	1	1	57.5363	35.5769
DATA	789	10	24	0	0	A_64_P144850	ENSRNOT00000002335	1035.52	240.77	3.852666e+001	5.168970e+000	101.5	45	9.772032e+000	0	0	0	0	0	0	35.9717	1	1	42.9674	44.2759
DATA	790	10	25	0	0	A_42_P703023	NM_145776	1061.33	241.5	1.750841e+002	1.784333e+001	224	42.5	8.652615e+000	0	0	0	1	0	0	163.717	1	1	57.5363	41.2083
DATA	791	10	26	0	0	A_64_P153581	NM_001109367	1086.5	241.5	3.830841e+001	5.146635e+000	101	49.5	1.897134e+001	0	0	0	0	1	0	35.8627	1	1	65	55.5
DATA	792	10	27	0	0	A_44_P156782	NM_001013879	1111.7	241.189	8.760842e+002	8.767569e+001	835	43	1.098946e+001	0	0	0	0	0	0	820.893	1	1	48.8603	43.5556
DATA	793	10	28	0	0	A_43_P12841	NM_053535	1137.42	241.573	9.979711e+001	1.055312e+001	156	42.5	1.060059e+001	0	0	0	0	0	0	93.5797	1	1	57.5363	42.2
DATA	794	10	29	0	0	A_64_P097715	NM_001135710	1162.75	241.592	1.256239e+002	1.302216e+001	182	46	1.515243e+001	0	0	0	0	0	0	117.852	1	1	49.5074	48.1034
DATA	795	10	30	0	0	A_42_P769597	NM_001106230	1187.82	241.361	6.404885e+002	6.414057e+001	663	48	1.269414e+001	0	0	0	0	0	0	600.984	1	1	47.8731	50.4324
DATA	796	10	31	0	0	A_42_P561835	ENSRNOT00000043937	1213.5	241.5	1.239027e+002	1.285601e+001	178.5	45	8.502280e+000	0	0	0	0	0	0	116.26	1	1	57.5363	45.8824
DATA	797	10	32	0	0	A_42_P604399	NM_012941	1238.63	241.37	7.884463e+003	7.884538e+002	7168	46	7.499821e+000	0	0	0	0	0	0	7396.18	1	1	48.2044	45.7742
DATA	798	10	33	0	0	A_42_P744495	NM_017125	1263.99	241.616	1.687585e+003	1.687934e+002	1611	44.5	7.059210e+000	0	0	0	0	0	0	1582.33	1	1	48.8603	43.5294
DATA	799	10	34	0	0	A_64_P047391	A_64_P047391	1289.42	241.758	2.135545e+002	2.162979e+001	270	37.5	7.814385e+000	0	0	0	0	0	0	200.09	1	1	46.1809	38.7692
DATA	800	10	35	0	0	A_44_P856007	NM_001108489	1315	241.545	8.910423e+001	9.550488e+000	147	42	1.071780e+001	0	0	0	0	0	0	83.4028	1	1	55.8519	40.6061
DATA	801	10	36	0	0	A_64_P057562	ENSRNOT00000031129	1340.35	241.77	3.209362e+002	3.227762e+001	358	40.5	1.121855e+001	0	0	0	0	0	0	300.043	1	1	48.8603	43.1786
DATA	802	10	37	0	0	A_64_P102395	ENSRNOT00000029656	1365.58	241.573	9.995201e+001	1.057274e+001	154	43	8.798827e+000	0	0	0	0	0	0	93.3095	1	1	57.5363	43.25
DATA	803	10	38	0	0	A_64_P132318	NM_133296	1391.17	241.449	2.563333e+002	2.586478e+001	310	42	9.949113e+000	0	0	0	0	0	0	238.892	1	1	46.8651	42.1212
DATA	805	10	40	0	0	A_64_P158848	NM_001130540	1441.88	241.5	7.016712e+002	7.025269e+001	712	39	9.211968e+000	0	0	0	0	0	0	651.299	1	1	47.2035	40.973
DATA	806	10	41	0	0	A_64_P302888	NM_001135015	1467.07	241.814	4.878624e+001	5.989337e+000	108	38.5	8.834378e+000	0	0	0	0	0	0	45.1797	1	1	46.8651	38.8158
DATA	807	10	42	0	0	A_42_P604331	NM_001108533	1492.61	241.931	5.848924e+004	5.848925e+003	53251	41	9.366394e+000	0	0	0	0	0	0	54026.3	1	1	53.8203	42.037
DATA	808	10	43	0	0	A_64_P166406	NM_019152	1518.19	241.847	3.429137e+002	3.446882e+001	378	38	8.498774e+000	0	0	0	0	0	0	315.861	1	1	47.5395	40.6667
DATA	809	10	44	0	0	A_64_P123660	NM_001031655	1543.28	241.905	9.221248e+002	9.227900e+001	846	44	9.508008e+000	0	0	0	0	0	0	846.884	1	1	48.8603	43.2813
DATA	810	10	45	0	0	A_42_P668800	NM_001127553	1568.46	241.597	6.669425e+002	6.678678e+001	672.5	41	8.481590e+000	0	0	0	0	0	0	610.582	1	1	47.5395	42.7111
DATA	811	10	46	0	0	A_64_P090458	NM_001109516	1595.48	242.063	5.545981e+000	3.570344e+000	68	40	7.789289e+000	0	0	0	0	0	0	5.05932	1	0	38.2652	40.1111
DATA	812	10	47	0	0	A_42_P635396	NM_001109506	1619.21	241.806	1.560596e+003	1.560997e+002	1437	41	8.370277e+000	0	0	0	0	0	0	1418.9	1	1	47.5395	42.6923
DATA	813	10	48	0	0	A_64_P002989	NM_031604	1645.5	242	5.172150e+004	5.172151e+003	46420.5	41.5	9.188897e+000	0	0	0	0	0	0	46845.2	1	1	54.1152	41.4412
DATA	814	10	49	0	0	A_44_P914346	DV717012	1670.41	241.912	1.158843e+003	1.159392e+002	1073	38	1.119485e+001	0	0	0	0	0	0	1045.58	1	1	49.8279	39.4839
DATA	815	10	50	0	0	A_44_P791176	NM_001130577	1696	242	1.814213e+001	4.014002e+000	80	38	8.871031e+000	0	0	0	0	0	0	16.3024	1	1	54.9904	39.8378
DATA	816	10	51	0	0	A_64_P011894	NM_001004210	1721.14	242.031	1.637804e+004	1.637808e+003	14813.5	44	9.842347e+000	0	0	0	0	0	0	14656.2	1	1	45.835	44.4444
DATA	817	10	52	0	0	A_42_P717654	XM_001063683	1746.38	242	2.729645e+003	2.729884e+002	2447	42	8.249033e+000	0	0	0	0	0	0	2432.17	1	1	48.5334	42.1892
DATA	818	10	53	0	0	A_64_P006102	NM_001100784	1772	241.576	2.825257e+002	2.848450e+001	317	42.5	1.008020e+001	0	0	0	0	0	0	250.596	1	1	45.4864	42.1
DATA	819	10	54	0	0	A_64_P116038	NM_001000335	1797.5	242.352	7.370059e+000	3.717709e+000	71	44	6.924806e+000	0	0	0	0	0	0	6.50762	1	0	65	42.4
DATA	820	10	55	0	0	A_42_P581567	NM_001011899	1822.91	242.386	9.337909e+001	1.002993e+001	149	39	7.473675e+000	0	0	0	0	0	0	82.0671	1	1	57.259	39.1786
DATA	821	10	56	0	0	A_42_P671206	FQ231880	1848.27	241.643	6.195151e+002	6.206064e+001	591	41	9.790443e+000	0	0	0	0	0	0	541.843	1	1	46.8651	41.3421
DATA	823	10	58	0	0	A_64_P078205	NM_001044255	1898.54	242.176	3.001837e+003	3.002066e+002	2611.5	41	7.930369e+000	0	0	0	0	0	0	2600.38	1	1	48.8603	40.8571
DATA	824	10	59	66	-1	(-)3xSLv1	NegativeControl	1923.8	242.462	3.747447e+000	3.732520e+000	62	39.5	9.383343e+000	0	0	0	0	0	0	-3.55021	0	0	45.835	38.7667
DATA	825	10	60	0	0	A_44_P259051	NM_001037658	1949.65	242.12	4.053549e+002	4.070874e+001	398	44	9.841212e+000	0	0	0	0	0	0	347.641	1	1	48.8603	42.871
DATA	826	10	61	0	0	A_64_P325262	A_64_P325262	1975.25	241.82	2.602173e+001	4.581511e+000	84	36	6.827546e+000	0	0	0	0	0	0	22.2036	1	1	44.4243	36.3333
DATA	827	10	62	0	0	A_64_P140005	NM_001191804	2000.35	242.405	2.335620e+001	4.451327e+000	85	39.5	7.348051e+000	0	0	0	0	0	0	19.8316	1	1	48.5334	39.0769
DATA	828	10	63	0	0	A_42_P588606	NM_001134544	2025.88	241.846	1.326303e+002	1.379906e+001	180	41	8.470028e+000	0	0	0	0	0	0	112.043	1	1	45.835	41.7931
DATA	829	10	64	0	0	A_42_P788541	NM_001106794	2051.17	242	3.304997e+003	3.305219e+002	2803	37	7.519023e+000	0	0	0	0	0	0	2778.22	1	1	46.8651	37.75
DATA	830	10	65	0	0	A_44_P1050200	NM_001108000	2076.67	242.5	1.009905e+003	1.010637e+002	931.5	35	8.694331e+000	0	0	0	0	0	0	844.782	1	1	57.5363	37.5161
DATA	831	10	66	0	0	A_42_P777935	ENSRNOT00000027369	2102.15	242.176	1.537418e+002	1.585266e+001	191	36	6.679688e+000	0	0	0	0	0	0	127.973	1	1	46.1809	35.7586
DATA	832	10	67	0	0	A_44_P349475	NM_031333	2127.19	242.392	8.584451e+002	8.593231e+001	757	39	8.202607e+000	0	0	0	0	0	0	711.205	1	1	49.1849	38.4
DATA	833	10	68	0	0	A_64_P136188	XM_001059617	2153.11	242.5	1.446272e+002	1.497991e+001	183	38	6.548719e+000	0	0	0	0	0	0	119.25	1	1	56.9804	37.1667
DATA	834	10	69	0	0	A_64_P023386	NM_001106232	2178.38	242.237	2.344932e+004	2.344935e+003	19343.5	41	1.074292e+001	0	0	0	0	0	0	19246.3	1	1	49.1849	40.1111
DATA	835	10	70	0	0	A_64_P048576	NM_001000163	2203.66	241.81	2.632826e+001	4.736774e+000	83.5	44	8.159449e+000	0	0	0	0	0	0	21.5131	1	1	42.9674	44.4375
DATA	836	10	71	1028	1	(+)E1A_r60_a20	E1A_r60_a20	2229.33	242.5	2.297013e+001	4.573155e+000	80.5	41	9.453824e+000	0	0	0	0	0	0	18.6896	1	1	57.5363	40.5143
DATA	837	10	72	0	0	A_64_P078510	XM_001053102	2254.46	242.139	5.170222e+002	5.185446e+001	485.5	36	1.139592e+001	0	0	0	0	0	0	418.957	1	1	47.8731	39.6053
DATA	838	10	73	0	0	A_64_P101533	A_64_P101533	2279.77	242.62	4.001790e+000	3.985850e+000	59	38	8.404300e+000	0	0	0	0	0	0	-5.14417	0	0	50.4627	37.9677
DATA	839	10	74	0	0	A_64_P164601	ENSRNOT00000050537	2305.28	242.5	4.917031e+001	6.338938e+000	104	37.5	1.010308e+001	0	0	0	0	0	0	39.5454	1	1	42.9674	38.4412
DATA	840	10	75	0	0	A_42_P694928	NM_001109046	2330.4	242.26	2.534106e+002	2.565705e+001	257	38	9.605075e+000	0	0	0	0	0	0	203.112	1	1	50.1463	38.5333
DATA	841	10	76	0	0	A_42_P510565	ENSRNOT00000046259	2356	242.5	9.828431e+002	9.836678e+001	837.5	38	7.202405e+000	0	0	0	1	0	0	785.286	1	1	48.5334	37.4815
DATA	842	10	77	0	0	A_64_P050877	XM_001081816	2381.58	242.573	4.863013e+000	4.067695e+000	67	40	8.997311e+000	0	0	0	0	0	0	3.87439	1	0	57.5363	40.875
DATA	843	10	78	0	0	A_44_P281352	NM_001013076	2407	242.545	2.915862e+002	2.943838e+001	292	38	8.146165e+000	0	0	0	0	0	0	231.719	1	1	55.8519	40.12
DATA	844	10	79	0	0	A_44_P269675	ENSRNOT00000031839	2432.12	242.397	5.108198e+002	5.124289e+001	467.5	39	7.807294e+000	0	0	0	0	0	0	405.052	1	1	48.5334	39.9231
DATA	845	10	80	66	1	DarkCorner	DarkCorner	2457.58	242.573	4.081296e+000	4.065040e+000	59.5	41	8.411768e+000	0	0	0	0	0	0	-0.214466	0	0	57.5363	39.7857
DATA	846	10	81	66	1	DarkCorner	DarkCorner	2483.47	242.72	4.087178e+000	4.070898e+000	52	38.5	6.967802e+000	0	0	0	0	0	0	-9.03016	0	0	49.1849	37.5714
DATA	847	10	82	66	1	DarkCorner	DarkCorner	2508.59	242.114	4.091574e+000	4.075277e+000	56.5	41	9.491727e+000	0	0	0	0	0	0	-3.83029	0	0	50.1463	41.9434
DATA	848	10	83	66	1	DarkCorner	DarkCorner	2533.91	242.614	4.093619e+000	4.077314e+000	61	42	5.081759e+000	0	0	0	0	0	0	-0.482211	0	0	65	42.4583
DATA	849	10	84	66	1	DarkCorner	DarkCorner	2559.87	242.407	4.094086e+000	4.077779e+000	56	43	8.566561e+000	0	0	0	0	0	0	-5.77128	0	0	53.5237	40.6667
DATA	850	10	85	66	1	DarkCorner	DarkCorner	2584.15	242.585	4.092381e+000	4.076081e+000	59	35	7.947300e+000	0	0	0	0	0	0	-1.87115	0	0	45.1352	35.2331
DATA	851	11	1	66	1	DarkCorner	DarkCorner	438.443	248.67	3.752244e+000	3.744299e+000	62.5	47	3.494807e+001	0	0	0	0	1	0	1.97023	0	0	52.6241	61.375
DATA	852	11	2	66	1	DarkCorner	DarkCorner	464.559	250.574	1.820104e+001	4.140129e+000	73	40	8.681588e+000	0	0	0	1	0	0	15.7485	1	0	43.7019	40.6866
DATA	853	11	3	66	1	DarkCorner	DarkCorner	489.582	248.427	3.718351e+000	3.707270e+000	64	40.5	9.926907e+000	0	0	0	0	0	0	1.4443	0	0	57.5363	40.75
DATA	854	11	4	66	1	DarkCorner	DarkCorner	515.277	249.606	3.700627e+000	3.686753e+000	63	44	1.339330e+001	0	0	0	0	0	0	0.697414	0	0	52.3208	44.3947
DATA	855	11	5	66	1	DarkCorner	DarkCorner	539.304	248.759	3.685521e+000	3.670842e+000	56	44.5	1.133318e+001	0	0	0	0	0	0	-5.0741	0	0	50.1463	43.2105
DATA	856	11	6	66	1	DarkCorner	DarkCorner	565.444	248.1	3.669126e+000	3.654511e+000	60	38.5	7.658035e+000	0	0	0	0	0	0	-2.45185	0	0	52.0157	38.1429
DATA	857	11	7	0	0	A_64_P077381	A_64_P077381	591.418	248.427	2.541521e+001	4.437818e+000	84	39	8.852871e+000	0	0	0	0	0	0	22.4778	1	1	65	38.04
DATA	858	11	8	0	0	A_64_P085926	NM_030860	616.611	248.278	7.642132e+002	7.650713e+001	716	35	8.413877e+000	0	0	0	0	0	0	678.765	1	1	48.5334	36.28
DATA	859	11	9	0	0	A_42_P598560	NM_001033693	642.039	248.342	7.333929e+002	7.342795e+001	686.5	40	7.900422e+000	0	0	0	0	0	0	654.156	1	1	49.1849	40
DATA	860	11	10	0	1	ETG08_142674	ETG08_142674	667.5	248.5	6.059536e+000	3.643040e+000	66	41	8.014642e+000	0	0	0	0	0	0	5.42735	1	0	57.5363	39.8
DATA	861	11	11	0	0	A_42_P724142	NM_001106340	692.817	248.493	6.146067e+002	6.156473e+001	602.5	38	5.818584e+000	0	0	0	0	0	0	552.69	1	1	47.8731	38.5484
DATA	862	11	12	0	0	A_64_P054193	NM_001014193	718.418	248.573	2.715541e+004	2.715543e+003	24300.5	44.5	1.067628e+001	0	0	0	0	0	0	24515.9	1	1	57.5363	45.2188
DATA	863	11	13	0	0	A_42_P750554	NM_001107846	743.539	248.118	5.410790e+002	5.422429e+001	533.5	36.5	6.436811e+000	0	0	0	0	0	0	490.273	1	1	49.8279	36.8929
DATA	864	11	14	0	0	A_44_P285547	NM_053393	769.107	248.5	7.254105e+001	8.070850e+000	126.5	38	6.302841e+000	0	0	0	0	0	0	65.9723	1	1	56.9804	37.625
DATA	865	11	15	0	0	A_42_P623374	NM_138845	794.5	248.5	1.170786e+003	1.171317e+002	1094	42	7.451017e+000	0	0	0	0	0	0	1068.45	1	1	57.5363	41.2
DATA	866	11	16	0	0	A_64_P064888	NM_001127303	819.893	248.5	2.142743e+002	2.171367e+001	259.5	38	9.066150e+000	0	0	0	0	0	0	196.191	1	1	56.9804	38.8485
DATA	867	11	17	0	0	A_44_P522406	NM_001001103	845.209	248.776	2.349749e+001	4.218134e+000	84	33	7.250626e+000	0	0	0	0	1	0	21.5822	1	1	46.1809	32.5938
DATA	868	11	18	0	0	A_42_P660129	NM_130422	870.582	248.573	2.616122e+001	4.363953e+000	88	39.5	1.044466e+001	0	0	0	0	0	0	24.099	1	1	57.5363	42
DATA	869	11	19	0	0	A_64_P035679	A_64_P035679	896.107	248.5	3.206309e+004	3.206311e+003	29633	40.5	7.029812e+000	0	0	0	0	0	0	29617.3	1	1	56.9804	39.8056
DATA	870	11	20	0	0	A_64_P118862	NM_001191999	921	248.871	4.100041e+001	5.374144e+000	102.5	41	8.078085e+000	0	0	0	0	0	0	37.9695	1	1	46.8651	39.5429
DATA	871	11	21	0	0	A_42_P638181	NM_133395	946.5	248.5	7.166920e+003	7.167004e+002	6636	38.5	9.080799e+000	0	0	0	0	0	0	6652.61	1	1	49.1849	38.4333
DATA	872	11	22	0	0	A_44_P423803	NM_031144	972.068	248.479	1.749628e+004	1.749631e+003	16387	43	8.098955e+000	0	0	0	0	0	0	16275.9	1	1	48.5334	42.4545
DATA	874	11	24	0	0	A_44_P445195	NM_133300	1022.63	248.64	9.427768e+002	9.434064e+001	952.5	38	8.151883e+000	0	0	0	0	0	0	880.234	1	1	48.8603	40.1034
DATA	875	11	25	0	0	A_42_P563276	NM_013093	1048.38	248.425	7.158825e+001	7.942861e+000	130.5	44	9.065732e+000	0	0	0	1	0	0	66.9394	1	1	48.5334	43
DATA	876	11	26	0	0	A_42_P535608	NM_001107160	1073.48	248.875	1.546757e+002	1.584472e+001	208	46.5	1.366081e+001	0	0	0	0	0	0	144.819	1	1	44.0646	48.8333
DATA	877	11	27	0	0	A_44_P233080	ENSRNOT00000026303	1098.94	248.708	4.512866e+003	4.512996e+002	4122	48	1.030492e+001	0	0	0	0	0	0	4229.64	1	1	53.2255	46.5161
DATA	878	11	28	0	0	A_43_P13320	NM_138880	1124.38	249.111	1.323539e+001	3.676561e+000	72.5	43	8.879397e+000	0	0	0	0	0	0	12.4152	1	0	48.5334	42.2571
DATA	879	11	29	0	0	A_42_P548007	NM_001135020	1149.77	248.676	5.745389e+003	5.745491e+002	5424	44	1.263382e+001	0	0	0	0	0	0	5392.24	1	1	46.8651	44.4483
DATA	880	11	30	0	0	A_44_P282853	NM_031983	1175.23	248.788	2.436598e+003	2.436839e+002	2287	48	1.331036e+001	0	0	0	0	1	0	2287.62	1	1	45.835	52.0323
DATA	881	11	31	0	0	A_42_P552341	NM_053519	1200.16	249.176	6.203077e+002	6.212534e+001	638	47	8.706995e+000	0	0	0	0	0	0	582.457	1	1	47.8731	46.2
DATA	882	11	32	0	0	A_64_P031476	NM_001107172	1226.15	248.785	1.599410e+002	1.635718e+001	215	44	7.089258e+000	0	0	0	0	0	0	150.155	1	1	45.835	44.1515
DATA	883	11	33	0	0	A_42_P620762	NM_024403	1251.51	248.87	7.821648e+003	7.821724e+002	7431.5	45	7.508818e+000	0	0	0	0	0	0	7340.3	1	1	47.2035	44.2647
DATA	884	11	34	0	0	A_64_P135370	A_64_P135370	1276.82	248.845	2.622049e+002	2.644397e+001	304	41	7.525012e+000	0	0	0	0	0	0	245.916	1	1	46.8651	41.3226
DATA	885	11	35	0	0	A_42_P576202	NM_001108583	1302.17	249	5.120323e+002	5.131822e+001	540	39	1.082808e+001	0	0	0	0	0	0	479.817	1	1	46.8651	40.2258
DATA	886	11	36	0	0	A_64_P022879	NM_001109019	1327.81	249.027	2.387459e+001	4.185127e+000	85	42	1.149679e+001	0	0	0	0	0	0	22.3477	1	1	47.5395	41.6364
DATA	887	11	37	0	0	A_42_P711589	NM_022948	1352.94	248.765	2.693624e+003	2.693844e+002	2543.5	39	8.961090e+000	0	0	0	0	0	0	2517.98	1	1	46.1809	40.3636
DATA	888	11	38	0	0	A_64_P007244	A_64_P007244	1378.24	249	3.682560e+003	3.682721e+002	3482	43.5	1.028719e+001	0	0	0	0	0	0	3437.14	1	1	46.8651	44.8529
DATA	889	11	39	0	0	A_42_P477625	NM_001108719	1403.68	248.863	1.758679e+003	1.759018e+002	1629	43	9.342713e+000	0	0	0	0	0	0	1638.51	1	1	48.2044	43.5625
DATA	890	11	40	0	0	A_64_P153091	XM_341223	1429.07	248.957	4.437499e+002	4.450971e+001	477	42	6.676874e+000	0	0	0	0	0	0	412.598	1	1	46.8651	41.75
DATA	891	11	41	0	0	A_64_P016347	NM_130819	1454.58	249.427	3.481976e+000	3.475688e+000	65.5	39	7.231235e+000	0	0	0	0	0	0	2.12857	0	0	57.5363	38.6571
DATA	892	11	42	0	0	A_42_P495598	NM_001014026	1480.09	249.386	8.970663e+000	3.590565e+000	72	39.5	9.512961e+000	0	0	0	0	0	0	8.30191	1	0	57.259	39.4412
DATA	893	11	43	0	0	A_42_P759043	NM_001134509	1505.5	249.352	4.211805e+002	4.226207e+001	442	42	8.795771e+000	0	0	0	0	0	0	388.74	1	1	57.5363	42.9677
DATA	894	11	44	0	0	A_64_P071595	XM_002728361	1531	249.567	7.580311e+000	3.577284e+000	70	39	9.494427e+000	0	0	0	0	0	0	6.97638	1	0	45.835	41.7188
DATA	895	11	45	0	0	A_42_P780882	NM_001008511	1556.09	248.672	3.729261e+003	3.729426e+002	3465.5	41	9.464697e+000	0	0	0	0	0	0	3421.47	1	1	45.1352	41.6585
DATA	896	11	46	0	0	A_64_P044420	NM_001134983	1581.49	249.059	6.865016e+001	7.714087e+000	126	41	7.350089e+000	0	0	0	0	0	0	62.7805	1	1	46.8651	42.9762
DATA	897	11	47	0	0	A_64_P000596	NM_001025732	1606.74	249.222	1.525041e+003	1.525450e+002	1434	42	1.347368e+001	0	0	0	0	0	0	1389.88	1	1	47.5395	45.96
DATA	898	11	48	0	0	A_44_P468873	ENSRNOT00000015693	1632.54	249.014	3.209931e+001	4.781242e+000	95	41	8.805439e+000	0	0	0	0	0	0	29.1461	1	1	48.5334	41.2051
DATA	900	11	50	0	0	A_42_P727022	NM_001107076	1683	249.5	9.380861e+003	9.380929e+002	8474	38.5	9.381022e+000	0	0	0	0	0	0	8452.6	1	1	48.5334	38.7647
DATA	901	11	51	0	0	A_64_P135604	NM_001009641	1708.5	249.5	1.880776e+003	1.881118e+002	1735	46	1.089979e+001	0	0	0	0	0	0	1687.68	1	1	49.1849	44.6552
DATA	902	11	52	0	0	A_42_P813939	NM_001108741	1733.59	249.28	1.413603e+003	1.414062e+002	1310	42	8.160641e+000	0	0	0	0	0	0	1263.12	1	1	48.8603	40.8966
DATA	903	11	53	0	0	A_64_P052494	A_64_P052494	1759.5	249.5	9.571278e+000	3.741443e+000	73.5	40	8.322492e+000	0	0	0	0	0	0	8.51429	1	0	65	39.9714
DATA	904	11	54	0	0	A_44_P323678	NM_001107651	1784.67	249.5	7.560385e+000	3.710987e+000	71	44	7.964167e+000	0	0	0	0	0	0	6.69546	1	0	65	43.1935
DATA	905	11	55	0	0	A_44_P435764	NM_001191810	1810.33	249.5	1.062533e+001	3.801668e+000	73.5	42.5	8.912151e+000	0	0	0	0	0	0	9.36592	1	0	57.5363	42.2333
DATA	906	11	56	0	0	A_42_P688320	NM_001108569	1835.07	249.448	1.609814e+002	1.651051e+001	205	40	8.224423e+000	0	0	0	0	0	0	141.249	1	1	45.835	40.8125
DATA	907	11	57	0	0	A_42_P798500	NM_001014023	1860.75	249.447	2.566941e+002	2.593254e+001	285.5	41.5	7.260460e+000	0	0	0	0	0	0	224.14	1	1	49.5074	40.8333
DATA	908	11	58	0	0	A_44_P279083	NM_133401	1886.25	249.795	3.460041e+002	3.479798e+001	364	44	8.139906e+000	0	0	0	0	0	0	300.659	1	1	48.5334	41.75
DATA	909	11	59	0	0	A_64_P129850	NM_001002855	1911.67	249.5	1.891586e+001	4.174372e+000	80	41	9.358505e+000	0	0	0	0	0	0	16.3555	1	1	57.5363	41.9333
DATA	910	11	60	0	0	A_64_P029468	NM_001105784	1937.33	249.5	1.560582e+001	4.052475e+000	78	41	1.018538e+001	0	0	0	0	0	0	13.4259	1	0	57.5363	40.25
DATA	911	11	61	0	0	A_43_P18571	NM_001013965	1962.34	248.831	1.647600e+002	1.689929e+001	211	42.5	8.105174e+000	0	0	0	0	0	0	141.04	1	1	45.4864	41.9583
DATA	912	11	62	0	1	ERCC-00104_60	ERCC-00104_60	1988	249.545	1.867611e+001	4.213925e+000	79.5	38	8.019271e+000	0	0	0	0	0	0	15.9077	1	0	55.8519	39.3939
DATA	913	11	63	0	0	A_44_P653701	NM_001106536	2013.07	249.479	7.107325e+001	8.057620e+000	123.5	39	7.006240e+000	0	0	0	0	0	0	60.2389	1	1	47.8731	38.1714
DATA	914	11	64	0	0	A_64_P093593	NM_001107077	2038.3	249.551	2.482425e+002	2.511570e+001	270	39	1.066325e+001	0	0	0	0	0	0	209.362	1	1	46.8651	42.8529
DATA	915	11	65	0	0	A_44_P1034793	NM_001008300	2064.33	249.5	5.829548e+002	5.842145e+001	561	36	6.146940e+000	0	0	0	0	0	0	489.158	1	1	57.5363	36.4571
DATA	916	11	66	0	0	A_42_P768355	NM_057130	2089.31	249.662	3.387324e+002	3.409167e+001	342.5	35	7.833050e+000	0	0	0	0	0	0	282.87	1	1	48.5334	36.76
DATA	917	11	67	0	0	A_44_P714581	NM_001107480	2114.72	249.84	3.173376e+003	3.173612e+002	2669	39	7.747922e+000	0	0	0	0	0	0	2637.32	1	1	49.1849	40.303
DATA	918	11	68	0	0	A_64_P084521	NM_019351	2140.05	249.808	3.141708e+003	3.141949e+002	2648.5	38	9.645591e+000	0	0	0	0	0	0	2598.69	1	1	49.5074	39.4118
DATA	919	11	69	0	0	A_42_P562625	NM_131913	2165.37	249.471	1.187429e+003	1.188072e+002	1044	38	9.865016e+000	0	0	0	0	0	0	977.635	1	1	46.5243	38.8125
DATA	920	11	70	0	0	A_42_P468662	NM_001108886	2191.14	249.593	8.542922e+002	8.551938e+001	761.5	42.5	8.340732e+000	0	0	0	0	0	0	700.164	1	1	56.9804	42.4667
DATA	921	11	71	0	0	A_42_P778587	NM_001135767	2216.35	249.212	1.339667e+002	1.396486e+001	171	41	7.344281e+000	0	0	0	0	0	0	109.32	1	1	41.0736	41.1
DATA	922	11	72	0	0	A_64_P139957	NM_001008525	2241.61	249.594	9.629645e+003	9.629726e+002	7820.5	42	1.087797e+001	0	0	0	0	0	0	7825.74	1	1	47.5395	41.8889
DATA	923	11	73	0	0	A_44_P318402	NM_001000187	2267.21	249.74	7.433993e+001	8.430022e+000	119	33	8.512668e+000	0	0	0	0	0	0	60.1728	1	1	48.5334	35.4138
DATA	924	11	74	0	0	A_64_P090359	NM_001033565	2292.22	249.776	1.019923e+001	4.118134e+000	72	35	9.253685e+000	0	0	0	0	0	0	8.22494	1	0	43.7019	38.4545
DATA	925	11	75	0	0	A_43_P17778	NM_001134991	2318.09	249.935	1.851037e+001	4.411309e+000	78	38	1.130619e+001	0	0	0	0	0	0	14.8739	1	0	54.4085	39.8158
DATA	926	11	76	0	0	A_64_P093176	A_64_P093176	2343.5	250	3.251060e+001	5.167968e+000	89	38	9.504978e+000	0	0	0	0	0	0	26.0384	1	1	54.1152	39.2308
DATA	927	11	77	0	0	A_64_P100123	NM_182821	2368.66	249.836	2.591386e+003	2.591700e+002	2079	39	7.382796e+000	0	0	0	0	0	0	2069.3	1	1	48.2044	39.5455
DATA	928	11	78	0	0	A_44_P426660	NM_001135717	2394.5	250	1.126542e+001	4.194369e+000	70	37	8.135097e+000	0	0	0	0	0	0	8.97138	1	0	65	38.5862
DATA	929	11	79	0	0	A_42_P696084	NM_031022	2419.7	249.971	1.402827e+003	1.403411e+002	1201.5	39	1.075895e+001	0	0	0	0	0	0	1114.55	1	1	46.1809	41.1304
DATA	930	11	80	66	1	DarkCorner	DarkCorner	2445	250	4.074029e+000	4.057802e+000	59	39	9.708669e+000	0	0	0	0	0	0	-4.42279	0	0	54.9904	40.7297
DATA	931	11	81	66	1	DarkCorner	DarkCorner	2470.82	250.051	4.080720e+000	4.064466e+000	57	37.5	7.922457e+000	0	0	0	0	0	0	-5.11963	0	0	49.1849	38.4545
DATA	932	11	82	66	1	DarkCorner	DarkCorner	2495.15	250.153	4.085434e+000	4.069161e+000	55	40	9.769207e+000	0	0	0	0	0	0	-6.61151	0	0	50.4627	40.1154
DATA	933	11	83	66	1	DarkCorner	DarkCorner	2521.93	249.904	4.088937e+000	4.072650e+000	58	40	6.619271e+000	0	0	0	0	0	0	-4.51106	0	0	46.8651	40.075
DATA	934	11	84	66	1	DarkCorner	DarkCorner	2546.22	250.096	4.090085e+000	4.073794e+000	58	43	8.001783e+000	0	0	0	0	0	0	-3.71505	0	0	47.8731	40.8378
DATA	935	11	85	66	1	DarkCorner	DarkCorner	2572.32	249.806	4.089548e+000	4.073259e+000	58	36	7.951156e+000	0	0	0	0	0	0	-3.04974	0	0	44.4243	37.2364
DATA	936	12	1	66	1	DarkCorner	DarkCorner	451.721	257.397	2.821793e+001	4.670862e+000	86	40	1.381154e+001	0	0	0	1	0	0	24.3922	1	1	65	44.3061
DATA	937	12	2	66	1	DarkCorner	DarkCorner	477.054	255.523	1.787727e+001	4.115453e+000	75.5	43	9.039187e+000	0	0	0	1	0	0	15.5172	1	0	65	42.5
DATA	938	12	3	66	1	DarkCorner	DarkCorner	501.373	255.932	5.972197e+000	3.738745e+000	63.5	47	2.200045e+001	0	0	0	0	1	0	5.20645	1	0	65	52.675
DATA	939	12	4	66	1	DarkCorner	DarkCorner	527.27	255.162	3.689192e+000	3.675944e+000	62	43.5	1.185109e+001	0	0	0	0	0	0	0.902855	0	0	48.5334	43.6786
DATA	940	12	5	66	1	DarkCorner	DarkCorner	553.313	255.711	3.672148e+000	3.657522e+000	58	41.5	1.031054e+001	0	0	0	0	0	0	-3.31582	0	0	51.4001	40.9167
DATA	941	12	6	0	0	A_64_P118227	XM_002728056	578.597	255.312	1.249380e+001	3.850228e+000	70	40	7.965132e+000	0	0	0	0	0	0	11.038	1	0	49.8279	39.12
DATA	942	12	7	0	0	A_64_P051317	NM_130425	604.088	255.614	8.969088e+001	9.674316e+000	141	38	8.243885e+000	0	0	0	0	0	0	79.5869	1	1	57.259	37.5357
DATA	943	12	8	0	0	A_42_P756350	NM_021772	629.5	255.648	7.218779e+001	8.071414e+000	125.5	38	8.976822e+000	0	0	0	0	0	0	64.3274	1	1	57.5363	38.6
DATA	944	12	9	0	0	A_42_P816479	NM_022278	654.541	255.824	5.573356e+003	5.573472e+002	4823	39	7.874008e+000	0	0	0	0	0	0	4986.91	1	1	48.8603	39
DATA	945	12	10	0	0	A_64_P351634	NM_001029901	680.114	256.057	1.802631e+002	1.837860e+001	222	39	7.880156e+000	0	0	0	0	0	0	161.957	1	1	46.8651	39.5926
DATA	946	12	11	0	0	A_64_P136597	A_64_P136597	705.426	255.897	3.455188e+002	3.473554e+001	370	37.5	8.259342e+000	0	0	0	0	0	0	311.638	1	1	46.5243	38.9063
DATA	947	12	12	0	0	A_64_P052017	ENSRNOT00000033592	731	256	1.761197e+001	3.966160e+000	78	42	1.140161e+001	0	0	0	0	0	0	15.946	1	0	54.9904	43.0571
DATA	948	12	13	0	0	A_44_P444485	TC589779	756	255.797	1.370281e+003	1.370739e+002	1246	38	5.586599e+000	0	0	0	0	0	0	1245.1	1	1	46.8651	38.2857
DATA	949	12	14	0	0	A_44_P147373	XM_226249	781.565	256	9.680038e+002	9.686467e+001	903	38	8.025093e+000	0	0	0	0	0	0	882.704	1	1	49.8279	38.5714
DATA	950	12	15	0	0	A_64_P059939	NM_001134540	807.5	256	1.943712e+004	1.943716e+003	17434	40.5	8.510453e+000	0	0	0	0	0	0	17785	1	1	54.1152	40.7647
DATA	951	12	16	0	0	A_42_P637279	NM_012743	832.534	255.699	1.290607e+001	3.735543e+000	77	35	9.395007e+000	0	0	0	0	0	0	11.8458	1	0	47.8731	35.8846
DATA	952	12	17	0	0	A_42_P771570	XM_001080365	857.5	256.237	2.028729e+002	2.058613e+001	249.5	34	7.421126e+000	0	0	0	0	0	0	186.769	1	1	48.5334	35.1613
DATA	953	12	18	0	0	A_43_P12942	NM_053817	882.929	256.2	5.675867e+003	5.675974e+002	5068.5	41.5	1.086278e+001	0	0	0	0	0	0	5240.13	1	1	46.8651	42.6667
DATA	954	12	19	0	0	A_64_P053307	NM_001191900	908.5	256	1.968924e+001	3.994814e+000	80	38	8.011252e+000	0	0	0	0	0	0	18.2256	1	1	54.1152	37.6389
DATA	955	12	20	0	0	A_42_P595630	NM_001013189	933.87	256.232	3.153833e+003	3.154024e+002	2952	37.5	8.749484e+000	0	0	0	0	0	0	2926.59	1	1	46.1809	37.1471
DATA	956	12	21	0	0	A_64_P154760	A_64_P154760	959.471	255.814	2.862069e+002	2.882904e+001	333	41	8.798106e+000	0	0	0	0	0	0	266.172	1	1	47.5395	42.64
DATA	957	12	22	0	0	A_42_P764359	NM_145086	984.5	255.794	1.357787e+003	1.358226e+002	1289	40	1.088531e+001	0	0	0	0	0	0	1265.27	1	1	46.5243	41.36
DATA	958	12	23	0	0	A_43_P10405	NM_001109257	1010.5	256.352	2.587185e+001	4.309269e+000	87	37	4.454448e+000	0	0	0	0	0	0	24.155	1	1	57.5363	37.5
DATA	959	12	24	0	0	A_44_P269950	ENSRNOT00000014054	1035.58	256.427	3.508105e+001	4.913821e+000	98	42	1.020154e+001	0	0	0	0	0	0	32.8049	1	1	57.5363	43
DATA	960	12	25	0	0	A_44_P160763	NM_001106513	1061.37	256.404	8.919013e+001	9.557974e+000	145.5	41	6.431829e+000	0	0	0	0	0	0	83.5189	1	1	57.8122	39.5789
DATA	961	12	26	0	0	A_64_P127678	NM_001008553	1086.32	256.063	5.420713e+002	5.431568e+001	551	41.5	1.302896e+001	0	0	0	0	0	0	508.155	1	1	49.8279	42.9231
DATA	962	12	27	0	0	A_42_P684885	NM_133517	1111.91	256.386	3.442721e+000	3.432436e+000	65	41.5	9.282696e+000	0	0	0	0	0	0	1.43897	0	0	57.259	42.2059
DATA	963	12	28	0	0	A_64_P102708	NM_001034149	1137.42	256.427	1.374366e+001	3.692010e+000	79	41	9.604893e+000	0	0	0	0	0	0	12.9048	1	0	65	42.4286
DATA	964	12	29	0	0	A_42_P547629	NM_001106718	1162.58	256.427	4.050254e+002	4.064711e+001	435	50.5	1.483042e+001	0	0	0	0	0	0	380.47	1	1	57.5363	50.3
DATA	965	12	30	0	0	A_42_P522285	NM_001044263	1188.11	256.5	3.393076e+002	3.410313e+001	380.5	46	8.594071e+000	0	0	0	0	0	0	318.804	1	1	56.9804	45.4839
DATA	966	12	31	0	0	A_64_P164423	NM_057193	1213.33	256.157	2.319796e+001	4.136394e+000	85.5	47	9.770217e+000	0	0	0	0	0	0	21.7948	1	1	47.2035	45.8857
DATA	967	12	32	0	0	A_44_P256143	NM_001047917	1238.67	256.5	6.291850e+001	7.163889e+000	124.5	45	7.117254e+000	0	0	0	0	0	0	59.0986	1	1	57.5363	43.9697
DATA	968	12	33	0	0	A_44_P727294	NM_001160314	1263.99	256.384	1.793906e+003	1.794234e+002	1703	42	8.257560e+000	0	0	0	0	0	0	1684.12	1	1	48.8603	41.3889
DATA	969	12	34	0	0	A_64_P108404	NM_001000092	1289.52	256.097	4.808172e+001	5.906166e+000	108	36	5.883742e+000	0	0	0	0	0	0	45.1043	1	1	43.7019	36.25
DATA	970	12	35	0	0	A_44_P520829	NM_001108777	1314.64	256.5	4.656372e+002	4.669011e+001	489	42	9.680636e+000	0	0	0	0	0	0	436.394	1	1	48.5334	42.7027
DATA	971	12	36	0	0	A_44_P229677	NM_001014221	1340.06	256.389	9.475099e+002	9.481332e+001	951.5	37	5.879891e+000	0	0	0	0	0	0	886.915	1	1	48.2044	35.8696
DATA	972	12	37	0	0	A_64_P126215	A_64_P126215	1365.67	256.5	1.073573e+001	3.605864e+000	71	39	9.574619e+000	0	0	0	0	0	0	10.0346	1	0	57.5363	39.56
DATA	973	12	38	0	0	A_64_P090035	A_64_P090035	1390.99	256.384	1.043813e+004	1.043819e+003	9652	43	8.748160e+000	0	0	0	0	0	0	9739.97	1	1	48.8603	44.0303
DATA	974	12	39	0	0	A_64_P089330	ENSRNOT00000012374	1416.26	256.257	1.293573e+002	1.338912e+001	182	42.5	7.359213e+000	0	0	0	0	0	0	120.475	1	1	48.8603	42.4091
DATA	975	12	40	0	0	A_44_P454429	NM_012712	1441.88	256.418	1.013225e+002	1.070742e+001	160	39	6.199014e+000	0	0	0	0	0	0	94.1637	1	1	46.1809	39.9722
DATA	976	12	41	0	1	ERCC-00144_60	ERCC-00144_60	1467.07	256.224	9.424073e+000	3.595948e+000	70	39	8.248962e+000	0	0	0	0	0	0	8.7377	1	0	48.8603	37.6857
DATA	977	12	42	0	0	A_42_P759843	XR_086347	1492.76	256.38	1.584838e+003	1.585220e+002	1533	41	6.688556e+000	0	0	0	0	0	0	1465.62	1	1	47.5395	40.5667
DATA	978	12	43	0	0	A_43_P14264	NM_053653	1518.33	256.5	2.516026e+002	2.540101e+001	297.5	39	8.670913e+000	0	0	0	0	0	0	232.029	1	1	57.5363	40.5517
DATA	979	12	44	0	0	A_64_P011223	NM_024353	1543.58	256.573	2.079641e+002	2.108876e+001	262.5	40	9.016115e+000	0	0	0	0	0	0	191.22	1	1	57.5363	41.75
DATA	980	12	45	0	0	A_42_P701169	NM_001109572	1569	256.545	8.187684e+002	8.195206e+001	832	41	7.526010e+000	0	0	0	0	0	0	750.455	1	1	55.8519	40.8158
DATA	981	12	46	0	0	A_64_P143307	NM_001014106	1594.01	256.417	4.308945e+002	4.323316e+001	453	40	7.884789e+000	0	0	0	0	0	0	393.633	1	1	48.5334	41.6452
DATA	982	12	47	0	0	A_44_P480636	NM_001005381	1619.54	256.143	1.608384e+002	1.646767e+001	211	41	7.364547e+000	0	0	0	0	0	0	146.404	1	1	47.5395	41.3548
DATA	983	12	48	0	0	A_64_P163564	ENSRNOT00000010609	1645.06	256.314	6.120102e+001	7.074127e+000	120	41	9.788263e+000	0	0	0	0	0	0	55.5018	1	1	46.8651	40.6857
DATA	984	12	49	0	0	A_42_P774028	NM_001017447	1670.26	256.757	1.662460e+003	1.662841e+002	1516.5	36	9.490214e+000	0	0	0	0	0	0	1501.91	1	1	48.8603	38.2353
DATA	985	12	50	0	0	A_43_P20110	ENSRNOT00000050558	1696	256.545	2.335039e+001	4.270970e+000	85	39	9.280920e+000	0	0	0	0	0	0	21.0087	1	1	55.8519	39.4706
DATA	986	12	51	0	0	A_44_P552865	NM_001170399	1721.04	256.863	5.770073e+002	5.781235e+001	583	46	1.114589e+001	0	0	0	0	0	0	517.02	1	1	46.8651	44.3333
DATA	987	12	52	0	0	A_43_P17428	NM_001012189	1746.58	257.101	1.859630e+002	1.894276e+001	235	40.5	9.351934e+000	0	0	0	0	0	0	165.911	1	1	47.2035	40.3438
DATA	988	12	53	0	0	A_64_P146222	TC633165	1772.06	256.621	1.708820e+004	1.708824e+003	15121	41	7.904080e+000	0	0	0	0	0	0	15177.1	1	1	45.4864	40.4324
DATA	989	12	54	0	0	A_64_P054856	NM_001135894	1797.38	256.62	2.677489e+002	2.702107e+001	298	43	6.385984e+000	0	0	0	0	0	0	236.726	1	1	47.8731	41.931
DATA	990	12	55	0	0	A_64_P154982	ENSRNOT00000018118	1822.63	256.63	7.089783e+003	7.089877e+002	5967.5	43.5	7.616034e+000	0	0	0	0	0	0	6239.32	1	1	48.2044	43.6786
DATA	991	12	56	0	0	A_42_P726363	NM_031536	1848.42	256.573	1.492799e+001	3.965497e+000	77	39	9.628175e+000	0	0	0	0	0	0	13.074	1	0	57.5363	41.3333
DATA	992	12	57	0	0	A_64_P139685	A_64_P139685	1873.5	257	1.378146e+001	3.940087e+000	79	42.5	7.503762e+000	0	0	0	0	0	0	12.0129	1	0	54.1152	41.125
DATA	993	12	58	0	0	A_64_P114104	NM_001034136	1898.8	257	3.800837e+003	3.801018e+002	3289	45	7.656415e+000	0	0	0	0	0	0	3296.97	1	1	49.1849	45
DATA	994	12	59	0	0	A_42_P480273	A_42_P480273	1924.31	256.986	2.702768e+003	2.703025e+002	2372	44	1.067069e+001	0	0	0	0	0	0	2332.85	1	1	47.2035	44.6364
DATA	995	12	60	0	0	A_64_P004344	ENSRNOT00000047696	1949.87	257	4.569298e+003	4.569452e+002	3971.5	43	7.284124e+000	0	0	0	0	0	0	3924.22	1	1	48.5334	42.4615
DATA	996	12	61	0	0	A_42_P723584	NM_001109099	1974.86	256.803	2.177138e+003	2.177463e+002	1823.5	40	7.579843e+000	0	0	0	0	0	0	1860.57	1	1	46.8651	40.8333
DATA	997	12	62	0	0	A_64_P114813	A_64_P114813	2000.5	257	3.799082e+000	3.791017e+000	66	40.5	6.811910e+000	0	0	0	0	0	0	1.96742	0	0	54.1152	41.5714
DATA	998	12	63	0	0	A_64_P034551	NM_053818	2026.03	256.986	8.686193e+001	9.482228e+000	136	40.5	8.910528e+000	0	0	0	0	0	0	73.4895	1	1	46.8651	41.2353
DATA	999	12	64	0	0	A_42_P492976	NM_001126099	2051.24	256.971	2.876819e+002	2.902093e+001	303	37	7.967439e+000	0	0	0	0	0	0	242.197	1	1	46.1809	37.9211
DATA	1000	12	65	0	0	A_64_P141799	NM_001025709	2076.65	257.12	5.019687e+002	5.034358e+001	471	36	7.953818e+000	0	0	0	0	0	0	420.535	1	1	48.8603	37.8214
DATA	1001	12	66	0	0	A_44_P337088	NM_133609	2102.12	256.985	3.446298e+002	3.467840e+001	349	39	8.902941e+000	0	0	0	0	0	0	287.315	1	1	46.8651	38.9355
DATA	1002	12	67	0	0	A_64_P137961	A_64_P137961	2127.5	257	6.747870e+001	7.782741e+000	120	37.5	7.903834e+000	0	0	0	0	0	0	55.9889	1	1	54.1152	38.1176
DATA	1003	12	68	0	0	A_64_P053822	ENSRNOT00000028268	2153	257	6.490441e+001	7.569997e+000	120	39	1.041683e+001	0	0	0	0	0	0	53.601	1	1	54.9904	39.8
DATA	1004	12	69	0	0	A_42_P484456	NM_001106601	2178.46	256.938	1.622255e+003	1.622727e+002	1398	38.5	1.020498e+001	0	0	0	0	0	0	1333.62	1	1	49.8279	41.3077
DATA	1005	12	70	0	0	A_44_P508632	NM_001107594	2203.58	257.427	9.371480e+000	4.040949e+000	70	42.5	7.794330e+000	0	0	0	0	0	0	7.67096	1	0	57.5363	42.3611
DATA	1006	12	71	0	0	A_64_P080598	NM_001047865	2229.41	257.028	2.760964e+001	4.817631e+000	84	42	7.246906e+000	0	0	0	0	0	0	22.5012	1	1	48.2044	41.2
DATA	1007	12	72	0	0	A_64_P144243	A_64_P144243	2254.96	256.947	1.376724e+001	4.196482e+000	73	41	1.132247e+001	0	0	0	0	0	0	11.174	1	0	46.8651	41.0857
DATA	1008	12	73	0	0	A_44_P479917	NM_030864	2279.83	257.449	9.159941e+000	4.083108e+000	69	41	1.013638e+001	0	0	0	0	0	0	7.40688	1	0	46.8651	40.2903
DATA	1009	12	74	0	0	A_44_P974524	NM_001025764	2305.05	257.098	3.282945e+001	5.169805e+000	91	38	9.852762e+000	0	0	0	0	0	0	26.4494	1	1	44.7812	39.2308
DATA	1010	12	75	0	0	A_42_P522899	NM_021578	2330.59	257.274	5.335603e+001	6.672825e+000	107	36.5	9.914503e+000	0	0	0	0	0	0	42.8409	1	1	48.5334	38.6563
DATA	1011	12	76	0	0	A_64_P069892	NM_019201	2355.69	257.338	1.686989e+004	1.686994e+003	13310	39	9.682264e+000	0	0	0	0	0	0	13503.5	1	1	48.5334	41.7097
DATA	1012	12	77	0	0	A_44_P415199	NM_001108748	2381.35	257.507	2.430643e+001	4.707194e+000	85	39	8.147300e+000	0	0	0	0	0	0	19.4008	1	1	47.2035	40.3871
DATA	1013	12	78	0	0	A_64_P034610	NM_022622	2407	257.455	9.846057e+001	1.064319e+001	143	39	8.301845e+000	0	0	0	0	0	0	78.3887	1	1	55.8519	39.4286
DATA	1014	12	79	0	0	A_42_P473828	ENSRNOT00000035309	2432.32	257.273	1.685047e+003	1.685534e+002	1398.5	39.5	8.490744e+000	0	0	0	1	0	0	1338.6	1	1	49.8279	41.1875
DATA	1015	12	80	66	1	DarkCorner	DarkCorner	2457.66	257.5	4.073655e+000	4.057429e+000	57	39	9.655454e+000	0	0	0	0	0	0	-5.66167	0	0	47.8731	40.0682
DATA	1016	12	81	66	1	DarkCorner	DarkCorner	2483.51	257.732	4.079387e+000	4.063139e+000	56.5	39	9.410793e+000	0	0	0	0	0	0	-5.40053	0	0	36.5637	39.7143
DATA	1017	12	82	66	1	DarkCorner	DarkCorner	2508.41	257.938	4.083243e+000	4.066979e+000	58	40	7.770135e+000	0	0	0	0	0	0	-2.84354	0	0	50.4627	40.1429
DATA	1018	12	83	66	1	DarkCorner	DarkCorner	2533.89	257.5	4.085722e+000	4.069448e+000	59	41	8.755459e+000	0	0	0	0	0	0	-3.7368	0	0	65	39.5161
DATA	1019	12	84	66	1	DarkCorner	DarkCorner	2558.75	257.873	4.085835e+000	4.069561e+000	57.5	41	7.261270e+000	0	0	0	0	0	0	-5.11438	0	0	47.5395	39.5641
DATA	1020	12	85	66	1	DarkCorner	DarkCorner	2584.73	257.688	4.084165e+000	4.067898e+000	56	36	7.980708e+000	0	0	0	0	0	0	-6.41195	0	0	54.1152	36.6472
DATA	1021	13	1	66	1	DarkCorner	DarkCorner	439	263	2.673887e+001	4.586441e+000	82	106	4.303441e+001	0	0	0	1	1	0	23.0876	1	1	54.9904	101.018
DATA	1022	13	2	66	1	DarkCorner	DarkCorner	464.5	263	2.125486e+001	4.275552e+000	79	43	1.105049e+001	0	0	0	1	0	0	18.4343	1	1	65	43.4483
DATA	1023	13	3	66	1	DarkCorner	DarkCorner	489.5	263	3.708402e+000	3.702694e+000	61	49.5	1.623212e+001	0	0	0	0	0	0	2.25519	0	0	65	50.3667
DATA	1024	13	4	66	1	DarkCorner	DarkCorner	515.885	263.356	3.691154e+000	3.677568e+000	60	44	1.290859e+001	0	0	0	0	0	0	0.792881	0	0	50.7771	45.2632
DATA	1025	13	5	66	1	DarkCorner	DarkCorner	540.169	262.539	3.676190e+000	3.661548e+000	59	40.5	1.126621e+001	0	0	0	0	0	0	-2.37447	0	0	51.0895	41.2105
DATA	1026	13	6	0	0	A_64_P029912	NM_001109143	565.779	263	1.327868e+002	1.376992e+001	178	38	9.268241e+000	0	0	0	0	0	0	117.207	1	1	46.1809	37.8519
DATA	1027	13	7	0	0	A_42_P574731	NM_012948	591.243	263	2.140787e+003	2.141094e+002	1883	38	9.929946e+000	0	0	0	0	0	0	1897.77	1	1	46.8651	38.0938
DATA	1028	13	8	0	0	A_44_P137448	NM_017043	616.625	263	2.109676e+002	2.140411e+001	252	38	9.094874e+000	0	0	0	1	0	0	187.812	1	1	48.5334	37.8438
DATA	1029	13	9	0	0	A_42_P770614	NM_001013235	642.392	263.069	2.420324e+004	2.420326e+003	21506	36	6.701584e+000	0	0	0	1	0	0	21637.8	1	1	53.8203	37.2917
DATA	1030	13	10	0	0	A_42_P785419	NM_199501	667.473	263	1.260573e+002	1.310550e+001	175.5	37	7.864233e+000	0	0	0	0	0	0	113.146	1	1	48.5334	38
DATA	1031	13	11	0	0	A_42_P581043	TC622715	692.52	263.147	4.580586e+003	4.580726e+002	4006.5	35	6.623149e+000	0	0	0	0	0	0	4127.54	1	1	49.8279	36.4074
DATA	1032	13	12	0	0	A_64_P098532	NM_001029928	718.418	263.427	1.593290e+001	3.897212e+000	76	37	1.000938e+001	0	0	0	0	0	0	14.4137	1	0	57.5363	38.9189
DATA	1033	13	13	0	0	A_64_P090758	A_64_P090758	743.736	262.625	1.071621e+003	1.072207e+002	1033	38	6.786417e+000	0	0	0	0	0	0	972.911	1	1	47.5395	38.6571
DATA	1034	13	14	0	0	A_43_P12079	NM_021583	768.945	263.027	4.324721e+001	5.583301e+000	99	36	7.319684e+000	0	0	0	0	0	0	39.4044	1	1	46.8651	36.7222
DATA	1035	13	15	0	0	A_64_P001947	A_64_P001947	794.5	263.352	1.287180e+001	3.747102e+000	72	38	8.294954e+000	0	0	0	0	0	0	11.7688	1	0	57.5363	38.963
DATA	1036	13	16	0	0	A_64_P064461	A_64_P064461	819.807	263.43	3.950085e+001	5.282722e+000	99	37.5	1.038777e+001	0	0	0	0	0	0	36.233	1	1	58.0869	39.0833
DATA	1037	13	17	0	0	A_42_P575398	NM_020538	845.101	263.772	3.510829e+000	3.496845e+000	59	35	9.984114e+000	0	0	0	0	0	0	-4.29176	0	0	49.8279	37.1429
DATA	1038	13	18	0	0	A_42_P482623	NM_199463	870.181	263.639	9.093070e+002	9.099753e+001	900	39	1.062980e+001	0	0	0	0	0	0	839.053	1	1	47.8731	41.2759
DATA	1039	13	19	0	0	A_42_P738431	NM_019175	895.467	263.333	1.232892e+003	1.233383e+002	1198	39	7.861453e+000	0	0	0	0	0	0	1140.67	1	1	49.1849	38.439
DATA	1040	13	20	0	0	A_44_P1027780	ENSRNOT00000065815	920.908	263.369	2.463842e+001	4.254814e+000	85.5	36.5	8.164575e+000	0	0	0	0	0	0	22.8532	1	1	45.1352	36.7857
DATA	1041	13	21	0	0	A_42_P479802	NM_053679	946.769	262.785	9.684368e+002	9.690550e+001	963	37	7.887516e+000	0	0	0	0	0	0	900.336	1	1	45.1352	36.7097
DATA	1042	13	22	0	0	A_44_P496624	NM_022302	972.257	262.8	4.200706e+001	5.438096e+000	101	38.5	7.614339e+000	0	0	0	0	0	0	39.1361	1	1	46.8651	38.7667
DATA	1043	13	23	0	0	A_42_P700753	FQ212883	997.391	263.406	1.098656e+003	1.099196e+002	1107	38	7.375945e+000	0	0	0	0	0	0	1025.56	1	1	47.5395	38.4074
DATA	1044	13	24	0	0	A_44_P229299	NM_001100678	1022.78	263.256	3.630659e+002	3.646929e+001	407	40	7.983207e+000	0	0	0	0	0	0	339.479	1	1	49.8279	41.7273
DATA	1045	13	25	0	0	A_42_P728472	NM_001007600	1048.13	263	8.472202e+003	8.472272e+002	7772.5	42.5	1.043322e+001	0	0	0	0	0	0	7933.21	1	1	46.8651	44.2353
DATA	1046	13	26	0	0	A_42_P488904	NM_001108947	1073.57	263.392	5.592019e+003	5.592125e+002	4993.5	43.5	1.050459e+001	0	0	0	0	0	0	5242.99	1	1	49.1849	42.8182
DATA	1047	13	27	0	0	A_42_P458494	NM_001034951	1099.15	263.48	6.978060e+001	7.774683e+000	129	40	7.863990e+000	0	0	0	0	0	0	65.4926	1	1	49.8279	41.1351
DATA	1048	13	28	0	0	A_64_P100331	ENSRNOT00000048614	1124.94	263.101	1.004508e+001	3.569821e+000	74	42.5	9.201199e+000	0	0	0	0	0	0	9.43496	1	0	46.8651	43.4
DATA	1049	13	29	0	0	A_64_P113989	NM_181631	1149.7	263.1	6.675620e+003	6.675708e+002	6105	44	9.466239e+000	0	0	0	0	0	0	6273.51	1	1	47.2035	43.9259
DATA	1050	13	30	0	0	A_64_P042105	ENSRNOT00000061599	1175.5	263.5	3.355208e+001	4.792819e+000	93	47	1.292980e+001	0	0	0	0	0	0	31.5423	1	1	57.5363	49.5862
DATA	1051	13	31	0	0	A_64_P044435	NM_001015020	1200.44	263.534	3.354931e+002	3.372341e+001	383	45	9.180681e+000	0	0	0	0	0	0	315.422	1	1	49.1849	44.1481
DATA	1052	13	32	0	0	A_64_P149011	NM_031352	1225.94	263.389	2.385130e+003	2.385375e+002	2271.5	43	8.645589e+000	0	0	0	0	0	0	2242.05	1	1	48.2044	43.0606
DATA	1053	13	33	0	0	A_42_P580844	NM_019296	1251.16	263.371	1.594885e+002	1.631229e+001	216	45	8.106953e+000	0	0	0	0	0	0	149.862	1	1	44.0646	45.4286
DATA	1054	13	34	0	0	A_64_P052972	A_64_P052972	1277	263.545	9.820832e+001	1.040137e+001	156	39	8.932242e+000	0	0	0	0	0	0	92.2227	1	1	55.8519	39.5806
DATA	1055	13	35	0	0	A_44_P454300	NM_001003979	1301.72	263.462	3.442981e+000	3.430690e+000	64.5	39	6.296338e+000	0	0	0	0	0	0	0.926877	0	0	46.1809	39.5185
DATA	1056	13	36	0	0	A_44_P149743	ENSRNOT00000005476	1327.53	263.789	1.311730e+001	3.675082e+000	74.5	39	7.362924e+000	0	0	0	0	0	0	12.2939	1	0	49.8279	39.1667
DATA	1057	13	37	0	0	A_42_P841017	NM_173309	1352.94	262.969	3.251550e+003	3.251732e+002	3098	38	7.245590e+000	0	0	0	0	0	0	3043.15	1	1	46.8651	36.963
DATA	1058	13	38	0	0	A_44_P206844	NM_013074	1378.5	263.648	7.634746e+001	8.375216e+000	133	40.5	6.777598e+000	0	0	0	0	0	0	71.3455	1	1	57.5363	41.0588
DATA	1059	13	39	0	0	A_64_P073400	NM_001000705	1403.91	263.614	1.441434e+002	1.482130e+001	195	42	7.581322e+000	0	0	0	0	0	0	134.457	1	1	57.259	41.2083
DATA	1060	13	40	0	0	A_64_P066676	A_64_P066676	1429.36	263.597	1.582348e+001	3.801304e+000	79	42	8.766975e+000	0	0	0	0	0	0	14.7302	1	0	49.8279	41.7879
DATA	1061	13	41	0	0	A_44_P386965	NM_001134594	1454.26	264	1.048218e+001	3.618931e+000	73	41	7.313493e+000	0	0	0	0	0	0	9.73687	1	0	44.7812	39.2222
DATA	1062	13	42	0	0	A_64_P095895	NM_019338	1480.28	263.583	4.291128e+001	5.520245e+000	104	38	6.171937e+000	0	0	0	0	0	0	39.7585	1	1	48.5334	37.9697
DATA	1063	13	43	1028	1	(+)E1A_r60_a22	E1A_r60_a22	1505.44	263.333	1.571230e+002	1.609348e+001	211.5	37	7.263475e+000	0	0	0	0	0	0	145.191	1	1	49.5074	38.125
DATA	1064	13	44	0	0	A_42_P541625	NM_001126090	1530.59	263.851	1.317906e+004	1.317910e+003	11873.5	40	9.344011e+000	0	0	0	0	0	0	12144.2	1	1	48.5334	41.8148
DATA	1065	13	45	0	0	A_64_P033895	NM_001126084	1555.85	263.785	8.742370e+001	9.417846e+000	143	41	8.270356e+000	0	0	0	0	0	0	80.3127	1	1	45.835	41.4146
DATA	1066	13	46	0	0	A_64_P012546	NM_022300	1581.5	264	4.305681e+004	4.305682e+003	39770.5	41	7.930342e+000	0	0	0	0	0	0	39425.1	1	1	54.1152	41.0968
DATA	1067	13	47	0	0	A_42_P495598	NM_001014026	1607	264	3.879659e+000	3.547374e+000	68	39	7.894465e+000	0	0	0	0	0	0	3.54014	1	0	54.9904	40.4516
DATA	1068	13	48	0	0	A_42_P483463	NM_001130999	1632.06	263.687	2.102116e+003	2.102414e+002	1904	41.5	8.717349e+000	0	0	0	0	0	0	1911.25	1	1	45.835	42.8158
DATA	1069	13	49	0	0	A_42_P575104	NM_153737	1657.5	264	1.171195e+002	1.223879e+001	168.5	41	1.028081e+001	0	0	0	0	0	0	106.084	1	1	54.1152	40.8485
DATA	1070	13	50	0	0	A_42_P461726	NM_133549	1683.38	264.116	1.977879e+001	4.078249e+000	81	39	9.537990e+000	0	0	0	0	0	0	17.8433	1	1	46.5243	39.7647
DATA	1071	13	51	0	0	A_64_P098688	A_64_P098688	1708.5	264	6.178241e+004	6.178242e+003	55239.5	44	1.233896e+001	0	0	0	0	0	0	55509.9	1	1	54.1152	43.4
DATA	1072	13	52	0	0	A_64_P105797	A_64_P105797	1733.47	263.782	2.150884e+001	4.190291e+000	87	45	9.502645e+000	0	0	0	0	0	0	19.2442	1	1	42.2201	42.8214
DATA	1073	13	53	0	0	A_42_P545943	NM_019291	1759.13	263.9	4.872458e+003	4.872592e+002	4355	38	8.663454e+000	0	0	0	0	0	0	4340.26	1	1	46.8651	38.9063
DATA	1074	13	54	0	0	A_44_P520045	NM_001001371	1784.72	263.841	1.063178e+002	1.123390e+001	160	42	8.723119e+000	0	0	0	0	0	0	94.2765	1	1	46.5243	41.303
DATA	1075	13	55	0	0	A_44_P306964	NM_001012184	1810.5	264	1.785918e+001	4.059380e+000	81	43	8.301205e+000	0	0	0	0	0	0	15.7629	1	0	54.1152	43.08
DATA	1076	13	56	0	0	A_44_P156043	NM_001039012	1835	264	9.232000e+002	9.239260e+001	890	43	9.034970e+000	0	0	0	0	0	0	811.147	1	1	46.8651	43.4545
DATA	1077	13	57	0	0	A_64_P054686	TC585752	1860.54	264.118	1.626628e+004	1.626632e+003	14097.5	39	6.180076e+000	0	0	0	0	0	0	14223.6	1	1	49.8279	39.12
DATA	1078	13	58	0	0	A_42_P575104	NM_153737	1885.97	264.227	1.171309e+002	1.228283e+001	166	44	8.887078e+000	0	0	0	0	0	0	101.926	1	1	48.8603	43.6389
DATA	1079	13	59	0	0	A_64_P142194	NM_053426	1911.38	264.237	1.319044e+003	1.319567e+002	1179	44	8.977256e+000	0	0	0	0	0	0	1142.19	1	1	49.1849	44.6552
DATA	1080	13	60	0	0	A_64_P043314	A_64_P043314	1937.42	264.427	2.386063e+001	4.431710e+000	85	41.5	1.069514e+001	0	0	0	0	0	0	20.5573	1	1	57.5363	40.9118
DATA	1081	13	61	0	0	A_44_P684315	NM_001109104	1962.5	264.352	2.412766e+004	2.412769e+003	20120.5	42	6.428277e+000	0	0	0	0	0	0	20685.2	1	1	57.5363	41.2857
DATA	1082	13	62	0	0	A_64_P142620	NM_201417	1987.55	264.208	4.699475e+001	6.025751e+000	101	39	8.586812e+000	0	0	0	0	0	0	40.0913	1	1	49.8279	39
DATA	1083	13	63	0	0	A_42_P568419	NM_001011894	2013.15	263.723	1.265604e+003	1.266171e+002	1123	40	6.924917e+000	0	0	0	0	0	0	1074.22	1	1	45.835	40.7895
DATA	1084	13	64	0	0	A_42_P519868	NM_053906	2038.69	264.185	1.567943e+002	1.613559e+001	195.5	41	1.001883e+001	0	0	0	0	0	0	132.427	1	1	45.4864	40.4242
DATA	1085	13	65	0	0	A_43_P12346	NM_022943	2064.33	264.5	1.055283e+002	1.122583e+001	152	36	7.744695e+000	0	0	0	0	0	0	88.6883	1	1	65	36.8621
DATA	1087	13	67	0	0	A_44_P556989	NM_012610	2114.89	264.5	4.035058e+001	5.587834e+000	96	42.5	7.335137e+000	0	0	0	0	0	0	33.5864	1	1	65	42.7857
DATA	1088	13	68	0	0	A_64_P113079	XM_218149	2140.42	264.427	3.899430e+000	3.900817e+000	65	39.5	1.019616e+001	0	0	0	0	0	0	3.00641	0	0	57.5363	41.9118
DATA	1089	13	69	0	0	A_64_P003937	NM_173111	2165.3	263.985	3.668967e+003	3.669175e+002	3047	37	8.666641e+000	0	0	0	0	0	0	3025.63	1	1	46.1809	39.2609
DATA	1090	13	70	0	0	A_42_P771337	NM_001012015	2191.11	264.5	7.968792e+001	8.880417e+000	128	43	8.865475e+000	0	0	0	0	0	0	65.4207	1	1	56.9804	43.1429
DATA	1091	13	71	0	0	A_44_P401035	A_44_P401035	2216.8	264.614	3.363880e+001	5.177874e+000	92	41.5	8.208032e+000	0	0	0	0	0	0	27.496	1	1	47.2035	41.75
DATA	1092	13	72	0	0	A_42_P536292	NM_033359	2241.89	264.5	4.725680e+002	4.742181e+001	447	40	9.619613e+000	0	0	0	0	0	0	384.686	1	1	56.9804	40.5862
DATA	1093	13	73	0	0	A_44_P128564	NM_001109121	2267.33	264.5	1.370343e+002	1.426643e+001	171.5	39	8.999956e+000	0	0	0	0	0	0	111.108	1	1	57.5363	38.5278
DATA	1094	13	74	0	0	A_64_P069957	NM_173315	2292.58	264.573	3.998994e+000	3.986232e+000	66	42	8.541612e+000	0	0	0	0	0	0	1.28318	0	0	65	41.6774
DATA	1095	13	75	0	0	A_44_P538691	NM_031772	2318.18	264.875	5.652349e+001	6.922821e+000	110	37	9.355883e+000	0	0	0	0	0	0	45.4998	1	1	47.2035	38.8056
DATA	1096	13	76	0	0	A_44_P499231	NM_001034148	2343.5	264.5	2.705093e+002	2.734657e+001	272.5	38	9.994703e+000	0	0	0	0	0	0	217.037	1	1	57.5363	40.4138
DATA	1097	13	77	0	0	A_64_P121489	XM_001065883	2368.67	264.5	4.174337e+000	4.043664e+000	66	39	9.755930e+000	0	0	0	0	0	0	3.33933	1	0	65	40.8333
DATA	1098	13	78	0	0	A_42_P507072	FQ213070	2393.86	264.58	2.374092e+003	2.374434e+002	1967	44	9.231755e+000	0	0	0	0	0	0	1894.19	1	1	47.2035	42.9565
DATA	1099	13	79	0	0	A_64_P120075	ENSRNOT00000027841	2419.63	264.873	2.182874e+002	2.219984e+001	232	39	9.496842e+000	0	0	0	0	0	0	173.755	1	1	47.5395	40.76
DATA	1100	13	80	0	0	A_44_P1007362	NM_138864	2445	264.545	1.340197e+002	1.400064e+001	169	40.5	9.670797e+000	0	0	0	0	0	0	106.463	1	1	55.8519	41.6818
DATA	1101	13	81	66	1	DarkCorner	DarkCorner	2470.89	264.811	4.073022e+000	4.056799e+000	55	38	9.318308e+000	0	0	0	0	0	0	-7.48808	0	0	47.8731	38.7727
DATA	1102	13	82	66	1	DarkCorner	DarkCorner	2496.91	264.818	4.077962e+000	4.061720e+000	55	39	1.137720e+001	0	0	0	0	0	0	-5.61151	0	0	36.9964	41.186
DATA	1103	13	83	66	1	DarkCorner	DarkCorner	2521.42	264.573	4.081060e+000	4.064805e+000	56	38.5	9.543934e+000	0	0	0	0	0	0	-6.27338	0	0	57.5363	39.2727
DATA	1104	13	84	66	1	DarkCorner	DarkCorner	2546.51	265.084	4.082007e+000	4.065748e+000	56	41	8.260882e+000	0	0	0	0	0	0	-4.61462	0	0	47.8731	38.3704
DATA	1105	13	85	66	1	DarkCorner	DarkCorner	2572	264.545	4.081558e+000	4.065301e+000	60	37	7.074648e+000	0	0	0	0	0	0	-0.19765	0	0	55.8519	37.525
DATA	1106	14	1	66	1	DarkCorner	DarkCorner	451.582	270.427	1.464589e+001	3.991235e+000	73.5	108	4.734745e+001	0	0	0	1	1	0	12.6921	1	0	57.5363	100.538
DATA	1107	14	2	66	1	DarkCorner	DarkCorner	476.094	269.66	1.450082e+001	3.971811e+000	70	44	1.200017e+001	0	0	0	1	0	0	12.6179	1	0	65	47.8214
DATA	1108	14	3	66	1	DarkCorner	DarkCorner	501.951	269.691	5.404043e+000	3.720572e+000	64.5	42	1.788588e+001	0	0	0	0	0	0	4.72345	1	0	49.1849	47.4634
DATA	1109	14	4	66	1	DarkCorner	DarkCorner	527.345	269.964	3.679526e+000	3.665453e+000	61.5	39	8.481121e+000	0	0	0	0	0	0	0.574061	0	0	50.4627	38.8
DATA	1110	14	5	66	1	DarkCorner	DarkCorner	553.429	270.143	3.663049e+000	3.648459e+000	60	39	9.092844e+000	0	0	0	0	0	0	-3.26475	0	0	47.5395	39.4138
DATA	1111	14	6	0	0	A_64_P151415	NM_001191684	578.636	270.377	1.393542e+002	1.440116e+001	178	37.5	7.526057e+000	0	0	0	0	0	0	123.423	1	1	49.8279	35.8077
DATA	1112	14	7	0	0	A_42_P475623	NM_053394	603.506	270.545	2.598062e+002	2.623129e+001	276	38	1.021393e+001	0	0	0	0	0	0	231.067	1	1	49.8279	37.8108
DATA	1113	14	8	0	0	A_44_P123636	ENSRNOT00000023689	629.5	270.5	3.809359e+000	3.622470e+000	64	37.5	8.533160e+000	0	0	0	0	0	0	3.40238	1	0	57.5363	38
DATA	1114	14	9	0	0	A_64_P135207	ENSRNOT00000043866	654.667	270.5	2.297715e+002	2.325559e+001	264.5	33.5	6.578365e+000	0	0	0	0	0	0	206.051	1	1	57.5363	35.6818
DATA	1115	14	10	0	0	A_42_P516693	NM_001107330	680.333	270.5	3.587852e+000	3.573561e+000	61	36	1.005856e+001	0	0	0	0	0	0	-1.6214	0	0	65	37.7143
DATA	1116	14	11	0	0	A_64_P125447	NM_001109231	705.205	270.577	7.723919e+001	8.504881e+000	129	34.5	8.168062e+000	0	0	0	0	0	0	69.8072	1	1	50.1463	35.8
DATA	1117	14	12	0	0	A_42_P701756	NM_001107646	730.627	270.64	1.442147e+003	1.442583e+002	1309.5	37	8.168023e+000	0	0	0	0	0	0	1308.27	1	1	48.8603	37.6154
DATA	1118	14	13	0	0	A_44_P344181	NM_017204	756	270.271	3.343223e+002	3.361851e+001	355.5	37	8.470349e+000	0	0	0	0	0	0	304.363	1	1	46.8651	37.0952
DATA	1119	14	14	0	0	A_64_P035330	ENSRNOT00000066415	781.662	270.162	4.989967e+002	5.002381e+001	512.5	36	7.193148e+000	0	0	0	0	0	0	455.861	1	1	49.1849	37.2069
DATA	1120	14	15	0	0	A_42_P837533	NM_001134546	807	270.31	3.651940e+003	3.652109e+002	3430	40	8.001154e+000	0	0	0	0	0	0	3347.3	1	1	51.7088	39.4615
DATA	1121	14	16	0	0	A_42_P744291	NM_001025729	832.132	270.5	9.126789e+002	9.133496e+001	874.5	38	9.495988e+000	0	0	0	0	0	0	839.164	1	1	49.8279	37.5926
DATA	1122	14	17	0	0	A_44_P149267	NM_001013099	858	270.545	1.937894e+001	3.990908e+000	81.5	37	1.045155e+001	0	0	0	0	0	0	17.8719	1	1	55.8519	39.2121
DATA	1123	14	18	0	0	A_64_P002546	NM_144741	883.418	270.573	3.493037e+000	3.486454e+000	65	39	8.579534e+000	0	0	0	0	0	0	2.08968	0	0	57.5363	38.5429
DATA	1124	14	19	0	0	A_42_P808236	NM_001107189	908.77	271.23	3.516533e+001	4.940247e+000	97.5	33.5	7.560707e+000	0	0	0	0	0	0	32.6078	1	1	48.2044	35.0833
DATA	1125	14	20	0	0	A_44_P425848	NM_001108747	933.736	270.778	2.199449e+002	2.226527e+001	260	34	7.370300e+000	0	0	0	0	0	0	204.42	1	1	47.5395	35.1081
DATA	1126	14	21	0	0	A_43_P17405	TC612613	959.5	270.648	1.771496e+002	1.804859e+001	225	37	7.086856e+000	0	0	0	0	0	0	165.01	1	1	57.5363	37.2
DATA	1127	14	22	0	0	A_64_P022402	NM_001142304	984.912	270.614	3.461142e+000	3.458334e+000	66	40.5	6.031420e+000	0	0	0	0	0	0	2.56979	0	0	57.259	40.4063
DATA	1128	14	23	0	0	A_44_P1019726	ENSRNOT00000025138	1010.47	270.743	8.347381e+001	9.028859e+000	147	39.5	6.585882e+000	0	0	0	0	0	0	78.049	1	1	49.1849	39.4231
DATA	1129	14	24	0	0	A_44_P128186	NM_053305	1035.49	270.528	8.015193e+001	8.720608e+000	135.5	41.5	1.244087e+001	0	0	0	0	0	0	75.0566	1	1	49.1849	45.4167
DATA	1130	14	25	0	0	A_44_P203665	NM_001105725	1061.09	270.614	1.407112e+002	1.448344e+001	192	40	8.924952e+000	0	0	0	0	0	0	131.945	1	1	57.259	39.8929
DATA	1131	14	26	0	0	A_42_P688802	DV723748	1086.08	270.89	1.756387e+003	1.756722e+002	1673	40	1.156147e+001	0	0	0	0	0	0	1648.83	1	1	46.8651	42.1034
DATA	1132	14	27	0	0	A_64_P129943	NM_001105712	1111.79	270.806	2.844249e+002	2.864789e+001	334	43	6.021352e+000	0	0	0	0	0	0	267.245	1	1	47.5395	42.5294
DATA	1133	14	28	0	0	A_64_P017577	NM_001106982	1137.5	271	2.314801e+001	4.131415e+000	86	46	9.299848e+000	0	0	0	0	0	0	21.7646	1	1	54.1152	44.8889
DATA	1134	14	29	0	0	A_44_P235926	NM_024138	1162.43	270.686	3.741661e+002	3.757265e+001	412.5	45	9.643268e+000	0	0	0	0	0	0	351.94	1	1	46.8651	43.2759
DATA	1135	14	30	0	0	A_42_P611638	NM_001034137	1187.79	270.806	5.175201e+002	5.186489e+001	532	46	9.016288e+000	0	0	0	0	0	0	486.875	1	1	47.5395	45.2963
DATA	1136	14	31	0	0	A_42_P654878	NM_001107919	1213.28	270.768	1.285920e+003	1.286375e+002	1246	42	1.128459e+001	0	0	0	0	0	0	1209.71	1	1	46.8651	42.4722
DATA	1137	14	32	0	0	A_64_P017464	NM_001135687	1238.8	270.536	3.434938e+000	3.428252e+000	64.5	45	7.469170e+000	0	0	0	0	0	0	2.05856	0	0	42.2201	44.7333
DATA	1138	14	33	0	0	A_64_P152873	NM_001207022	1264.5	271	6.089153e+001	6.985286e+000	120.5	42	9.454691e+000	0	0	0	0	0	0	57.2373	1	1	54.1152	41.4737
DATA	1139	14	34	0	0	A_64_P013243	A_64_P013243	1289.38	271	3.317809e+003	3.317986e+002	3155	36	6.122841e+000	0	0	0	0	0	0	3116.39	1	1	48.5334	36.1818
DATA	1140	14	35	0	0	A_64_P029720	NM_001109405	1314.79	271.141	1.306705e+002	1.350943e+001	185.5	40	6.785060e+000	0	0	0	0	0	0	122.617	1	1	47.2035	39.963
DATA	1141	14	36	0	0	A_43_P13459	NM_001107548	1340.38	271	1.615241e+002	1.651323e+001	213	39	3.890294e+000	0	0	0	0	0	0	151.381	1	1	48.5334	39.9565
DATA	1142	14	37	0	0	A_64_P053923	NM_001107323	1365.57	270.843	7.720803e+002	7.728455e+001	764	37	4.219286e+000	0	0	0	0	0	0	722.539	1	1	47.5395	37.4348
DATA	1143	14	38	0	0	A_44_P1005199	ENSRNOT00000032786	1391.42	271.427	2.945333e+001	4.531572e+000	90	42	7.484994e+000	0	0	0	0	0	0	27.5175	1	1	57.5363	41.6071
DATA	1144	14	39	0	0	A_44_P104821	NM_024369	1416.38	270.836	1.034927e+002	1.090933e+001	160.5	43	9.822423e+000	0	0	0	0	0	0	96.5043	1	1	48.5334	43
DATA	1145	14	40	0	0	A_64_P009956	A_64_P009956	1442	271.455	2.066280e+002	2.095012e+001	257	39	6.472807e+000	0	0	0	0	0	0	192.271	1	1	55.8519	38.4783
DATA	1146	14	41	0	0	A_64_P060947	NM_203334	1467.34	270.986	2.033820e+001	4.018674e+000	84.5	40	7.578251e+000	0	0	0	0	0	0	18.88	1	1	49.1849	38.4667
DATA	1147	14	42	0	0	A_64_P103419	NM_001106291	1492.58	271.427	5.187063e+000	3.513236e+000	68	36	6.373774e+000	0	0	0	0	0	0	4.80309	1	0	57.5363	37
DATA	1148	14	43	0	0	A_44_P220827	NM_001012051	1518.12	270.868	5.967511e+002	5.977676e+001	614	40	7.446151e+000	0	0	0	0	0	0	551.013	1	1	46.8651	38.6129
DATA	1149	14	44	0	1	ETG07_105829	ETG07_105829	1543.58	271.427	7.870876e+000	3.582363e+000	70.5	41	6.028499e+000	0	0	0	0	0	0	7.24633	1	0	57.5363	39.9697
DATA	1150	14	45	0	0	A_42_P719478	NM_001191779	1569	271.455	9.724733e+000	3.638290e+000	73.5	41	9.758702e+000	0	0	0	0	0	0	8.92476	1	0	55.8519	41.0323
DATA	1151	14	46	0	0	A_42_P462257	NM_001109481	1593.81	270.735	9.867122e+003	9.867185e+002	8912	40	7.015528e+000	0	0	0	0	0	0	9025.25	1	1	46.1809	39.8421
DATA	1152	14	47	0	0	A_44_P105634	NM_001007658	1619.75	271.015	1.563024e+002	1.602396e+001	204	40	6.461965e+000	0	0	0	0	0	0	142.455	1	1	45.4864	40.9032
DATA	1153	14	48	0	0	A_64_P100594	NM_001000360	1645.33	271.5	7.114533e+001	7.948073e+000	135	41.5	8.224491e+000	0	0	0	0	0	0	64.6031	1	1	57.5363	41.9211
DATA	1154	14	49	0	0	A_64_P004266	A_64_P004266	1670.29	271.487	9.080153e+000	3.670931e+000	73	39	1.059652e+001	0	0	0	0	0	0	8.21385	1	0	49.1849	40.6875
DATA	1155	14	50	0	0	A_44_P156343	NM_001000102	1695.89	271.5	9.100265e+000	3.685444e+000	73.5	42	9.662167e+000	0	0	0	0	0	0	8.19871	1	0	56.9804	41.4333
DATA	1156	14	51	0	0	A_42_P504358	NM_001108674	1721.42	271.427	2.172015e+002	2.201424e+001	257	43	7.885334e+000	0	0	0	0	0	0	194.863	1	1	57.5363	42.3871
DATA	1157	14	52	0	0	A_44_P281468	NM_001127556	1746.63	271.676	1.372309e+001	3.854231e+000	77.5	45	9.065172e+000	0	0	0	0	0	0	12.2595	1	0	46.5243	42.0345
DATA	1158	14	53	0	0	A_43_P12785	NM_053364	1772.11	271.5	6.619123e+000	3.677808e+000	70	40.5	9.016770e+000	0	0	0	0	0	0	5.88683	1	0	56.9804	40.0294
DATA	1159	14	54	0	0	A_64_P053297	NM_001107278	1797.64	271.402	1.097282e+003	1.097884e+002	1055	43	7.813037e+000	0	0	0	0	0	0	971.428	1	1	52.3208	41.1081
DATA	1160	14	55	0	0	A_64_P062986	NM_001001018	1822.89	271.5	1.572170e+001	3.975258e+000	77.5	41	7.506398e+000	0	0	0	0	0	0	13.8544	1	0	56.9804	41.7917
DATA	1161	14	56	0	0	A_44_P529226	NM_023091	1848.42	271.573	3.683225e+000	3.668554e+000	60.5	40	8.223965e+000	0	0	0	0	0	0	-2.65654	0	0	65	40.8214
DATA	1162	14	57	0	0	A_42_P559737	NM_020074	1873.21	271.627	8.349425e+002	8.357556e+001	801	41	9.429933e+000	0	0	0	0	0	0	728.86	1	1	49.1849	41.931
DATA	1163	14	58	0	0	A_44_P1017458	NM_199402	1899.11	271.5	8.538860e+001	9.307705e+000	136.5	44	9.186947e+000	0	0	0	0	0	0	74.1692	1	1	56.9804	43.3333
DATA	1164	14	59	0	0	A_44_P407750	NM_001127680	1924.31	271.662	6.800617e+002	6.810796e+001	653	42.5	1.050029e+001	0	0	0	0	0	0	587.837	1	1	48.5334	42.5263
DATA	1165	14	60	0	0	A_64_P033872	NM_001037353	1950.11	271.482	7.282478e+000	3.811388e+000	69	43	9.246372e+000	0	0	0	0	0	0	6.26314	1	0	51.7088	41.7667
DATA	1166	14	61	0	0	A_42_P472699	NM_001108061	1975.42	271.573	3.604642e+001	5.208559e+000	96	41	4.939418e+000	0	0	0	0	0	0	30.8479	1	1	57.5363	41.7419
DATA	1167	14	62	0	0	A_44_P201215	ENSRNOT00000014231	2000.52	272.061	1.191463e+001	3.961520e+000	75	41	8.124133e+000	0	0	0	0	0	0	10.1468	1	0	45.4864	41.8077
DATA	1168	14	63	0	0	A_64_P129910	NM_001107648	2025.75	271.403	2.027621e+002	2.062868e+001	236.5	40.5	8.317318e+000	0	0	0	0	0	0	171.814	1	1	48.2044	40.2778
DATA	1169	14	64	0	0	A_64_P027927	NM_022255	2051.5	271.471	6.336088e+001	7.396534e+000	118.5	40	6.851797e+000	0	0	0	0	0	0	53.4221	1	1	47.2035	38.4667
DATA	1170	14	65	0	0	A_64_P101623	A_64_P101623	2076.75	271.447	2.113319e+004	2.113323e+003	17753.5	39	7.255540e+000	0	0	0	0	0	0	17731.7	1	1	49.5074	38
DATA	1171	14	66	0	0	A_42_P645110	NM_001029919	2101.79	271.603	1.701553e+004	1.701557e+003	14018.5	40	8.154048e+000	0	0	0	0	0	0	14209.1	1	1	50.1463	40.8333
DATA	1172	14	67	0	0	A_64_P017781	NM_001010956	2127.21	271.889	8.376844e+001	9.228108e+000	131.5	44	8.624297e+000	0	0	0	0	0	0	69.6228	1	1	47.5395	44.3871
DATA	1173	14	68	0	0	A_64_P057106	NM_001004087	2153	271.545	7.695067e+001	8.622291e+000	129.5	37	5.491252e+000	0	0	0	0	0	0	63.6525	1	1	55.8519	38
DATA	1174	14	69	0	0	A_44_P187005	NM_022238	2178.5	271.648	3.890342e+001	5.513847e+000	96.5	41	1.039408e+001	0	0	0	0	0	0	32.0347	1	1	57.5363	41.5862
DATA	1175	14	70	0	0	A_42_P779933	NM_017117	2203.58	271.573	1.689904e+001	4.272795e+000	77	43.5	6.285865e+000	0	0	0	0	0	0	13.855	1	0	57.5363	42.6875
DATA	1176	14	71	0	0	A_42_P555701	NM_001107554	2229	271.5	6.982634e+003	6.982745e+002	5744.5	38	8.518887e+000	0	0	0	0	0	0	5700.62	1	1	47.2035	39.1429
DATA	1177	14	72	0	0	A_42_P705302	NM_001107361	2254.27	271.657	5.003625e+003	5.003782e+002	4021.5	40.5	9.426334e+000	0	0	0	0	0	0	4068.6	1	1	46.8651	41.375
DATA	1178	14	73	0	0	A_64_P015435	A_64_P015435	2279.74	271.647	2.117790e+004	2.117794e+003	17128	44	6.545262e+000	0	0	0	0	0	0	17154	1	1	46.1809	44.0741
DATA	1179	14	74	0	0	A_64_P036217	NM_001000569	2305.17	272.106	4.048464e+001	5.681734e+000	98.5	44	1.013228e+001	0	0	0	0	0	0	32.6754	1	1	46.1809	42.9412
DATA	1180	14	75	0	0	A_44_P543511	NM_001024749	2330.57	272.013	1.747162e+003	1.747620e+002	1490	41	9.821307e+000	0	0	0	0	0	0	1405.37	1	1	49.8279	41.4839
DATA	1181	14	76	0	0	A_42_P759043	NM_001134509	2355.87	271.987	4.271582e+002	4.290385e+001	397.5	35.5	6.485487e+000	0	0	0	0	0	0	342.531	1	1	47.5395	36.3077
DATA	1182	14	77	0	0	A_42_P679982	NM_001107835	2381.43	271.823	3.386525e+003	3.386764e+002	2734.5	42	8.513247e+000	0	0	0	0	0	0	2707.86	1	1	49.5074	43.7586
DATA	1183	14	78	0	0	A_43_P18064	NM_001106904	2406.72	271.986	1.975855e+001	4.491771e+000	78.5	44	7.976249e+000	0	0	0	0	0	0	15.76	1	0	47.5395	42.5652
DATA	1184	14	79	0	0	A_64_P092143	NM_001129879	2432.09	271.896	1.635832e+003	1.636332e+002	1346	42	7.674143e+000	0	0	0	0	0	0	1301.96	1	1	46.8651	41.6774
DATA	1185	14	80	0	0	A_64_P102886	A_64_P102886	2457.63	272.633	7.901918e+000	4.125875e+000	71	40	9.412714e+000	0	0	0	0	0	0	6.27844	1	0	42.9674	40.9231
DATA	1186	14	81	66	1	DarkCorner	DarkCorner	2482.7	272.343	4.071461e+000	4.055244e+000	60	41.5	1.119763e+001	0	0	0	0	0	0	-2.76708	0	0	47.2035	42.6471
DATA	1187	14	82	66	1	DarkCorner	DarkCorner	2508.5	272	4.075696e+000	4.059462e+000	60	41	1.104199e+001	0	0	0	0	0	0	-2.6234	0	0	54.1152	41.85
DATA	1188	14	83	66	1	DarkCorner	DarkCorner	2534.21	272.145	4.077789e+000	4.061547e+000	58	39.5	6.262096e+000	0	0	0	0	0	0	-4.86259	0	0	44.7812	38.5769
DATA	1189	14	84	66	1	DarkCorner	DarkCorner	2559.5	272	4.078077e+000	4.061834e+000	59	38	8.442795e+000	0	0	0	0	0	0	-2.44378	0	0	65	38.931
DATA	1190	14	85	66	1	DarkCorner	DarkCorner	2584.8	272.094	4.076205e+000	4.062023e+000	63.5	37.5	8.728415e+000	0	0	0	0	0	0	1.02366	0	0	45.835	38.3984
DATA	1191	15	1	66	1	DarkCorner	DarkCorner	439	277.545	1.150638e+001	3.889706e+000	72	87	3.440592e+001	0	0	0	0	1	0	9.96386	1	0	55.8519	91.206
DATA	1192	15	2	66	1	DarkCorner	DarkCorner	463.857	276.738	9.202919e+000	3.813165e+000	69	43	1.174403e+001	0	0	0	0	0	0	8.00188	1	0	59.4411	45.7879
DATA	1193	15	3	66	1	DarkCorner	DarkCorner	488.8	277.063	3.699170e+000	3.691879e+000	63	41	1.156683e+001	0	0	0	0	0	0	2.0461	0	0	49.8279	42.6667
DATA	1194	15	4	66	1	DarkCorner	DarkCorner	514.437	278	3.682369e+000	3.667702e+000	56	37	7.340409e+000	0	0	0	0	0	0	-5.81837	0	0	48.5334	36.5455
DATA	1195	15	5	66	1	DarkCorner	DarkCorner	540.582	277.573	3.666331e+000	3.651728e+000	57	39	8.927486e+000	0	0	0	0	0	0	-3.56727	0	0	65	40
DATA	1196	15	6	0	0	A_44_P451392	NM_001108023	566	277.545	2.609089e+002	2.634304e+001	289	36	7.672796e+000	0	0	0	0	0	0	230.87	1	1	55.8519	35.7778
DATA	1197	15	7	0	0	A_64_P012661	ENSRNOT00000010298	591.095	277.667	7.970235e+002	7.978456e+001	762.5	37	6.769317e+000	0	0	0	0	0	0	708.223	1	1	45.1352	36.0968
DATA	1198	15	8	0	0	A_42_P546058	NM_053670	616.479	277.648	1.323714e+003	1.324205e+002	1185	35	9.686076e+000	0	0	0	0	0	0	1181.12	1	1	47.8731	37.1515
DATA	1199	15	9	0	0	A_42_P695401	NM_031530	642.367	277.596	3.371710e+001	4.925840e+000	90.5	36	9.422452e+000	0	0	0	0	0	0	30.2101	1	1	57.8122	39
DATA	1200	15	10	0	0	A_44_P192193	A_44_P192193	667.5	277.648	1.057076e+002	1.115952e+001	160	37	7.562059e+000	0	0	0	0	0	0	95.0873	1	1	57.5363	36.4483
DATA	1201	15	11	0	0	A_42_P473886	NM_001165922	692.357	278.129	1.868546e+002	1.902214e+001	221	36	8.280516e+000	0	0	0	0	0	0	168.732	1	1	46.8651	35.4815
DATA	1202	15	12	0	0	A_42_P576953	NM_138882	717.909	278.182	3.863284e+002	3.879556e+001	409	36	8.247128e+000	0	0	0	0	0	0	350.185	1	1	45.835	35.7188
DATA	1203	15	13	0	0	A_44_P260227	ENSRNOT00000036745	743.5	278	3.090310e+001	4.696636e+000	90	37	8.961095e+000	0	0	0	0	0	0	28.114	1	1	54.1152	36.2683
DATA	1204	15	14	0	0	A_44_P276435	NM_053853	769.093	277.935	5.179366e+001	6.264714e+000	106	36	8.899929e+000	0	0	0	0	0	0	47.2848	1	1	65	36.1389
DATA	1205	15	15	0	0	A_43_P19066	NM_001017494	794.5	278	1.150434e+002	1.202862e+001	167	43	6.612062e+000	0	0	0	0	0	0	105.381	1	1	54.1152	40.087
DATA	1206	15	16	0	0	A_64_P113200	ENSRNOT00000061930	819.426	277.603	2.313134e+001	4.196730e+000	84	38	8.089421e+000	0	0	0	0	0	0	21.254	1	1	46.5243	38.5652
DATA	1207	15	17	0	0	A_42_P480108	NM_001007637	844.708	278.031	5.711811e+002	5.722469e+001	596.5	39	9.509588e+000	0	0	0	0	0	0	526.436	1	1	45.4864	37.9677
DATA	1209	15	19	0	0	A_44_P420046	NM_021669	896.061	278.273	5.527386e+001	6.527112e+000	114	36	7.628892e+000	0	0	0	0	0	0	51.2301	1	1	45.835	37
DATA	1210	15	20	0	0	A_64_P077021	A_64_P077021	921.211	278.634	1.670318e+001	3.844639e+000	78	36	7.034712e+000	0	0	0	0	0	0	15.5198	1	0	46.1809	36
DATA	1211	15	21	0	0	A_44_P292558	NM_213559	946.329	277.8	2.110285e+002	2.138387e+001	258	34.5	6.102572e+000	0	0	0	0	0	0	196.502	1	1	47.2035	34
DATA	1212	15	22	0	0	A_42_P471653	NM_001031654	972.091	278.091	6.551301e+000	3.509662e+000	69	40	7.546353e+000	0	0	0	0	0	0	6.11341	1	0	41.4593	39.6757
DATA	1213	15	23	0	0	A_43_P12000	NM_019272	996.91	278.104	5.040235e+002	5.051972e+001	508	40	6.662987e+000	0	0	0	0	0	0	471.196	1	1	46.8651	39.5333
DATA	1214	15	24	0	0	A_64_P131395	NM_001037523	1023	278	3.840981e+000	3.457260e+000	66	38	6.182528e+000	0	0	0	0	0	0	3.59689	1	0	54.9904	37.9032
DATA	1215	15	25	0	0	A_42_P682853	NM_017193	1048.07	277.792	3.337543e+002	3.355133e+001	375.5	44	9.761400e+000	0	0	0	0	0	0	312.982	1	1	46.8651	44.4722
DATA	1216	15	26	0	0	A_42_P647505	TC640289	1073.38	278	1.775762e+003	1.776093e+002	1650	45	1.367016e+001	0	0	0	0	0	0	1667.3	1	1	48.5334	45.96
DATA	1217	15	27	0	0	A_44_P682959	NM_001025139	1098.95	278.012	1.162616e+001	3.615438e+000	71	40	7.983181e+000	0	0	0	0	0	0	10.9269	1	0	51.7088	39.7419
DATA	1218	15	28	0	0	A_64_P249426	NM_001014271	1124.5	278.352	1.425407e+001	3.705783e+000	77	44	8.981343e+000	0	0	0	0	0	0	13.4075	1	0	57.5363	44.2581
DATA	1219	15	29	0	0	A_64_P133430	NM_001044282	1150	278.455	1.465059e+004	1.465063e+003	13565	42	8.751571e+000	0	0	0	0	0	0	13787.9	1	1	55.8519	42.56
DATA	1220	15	30	0	0	A_42_P635611	NM_001025685	1175.42	278.427	1.542187e+001	3.749660e+000	78.5	41.5	7.392260e+000	0	0	0	0	0	0	14.518	1	0	57.5363	40.1429
DATA	1221	15	31	0	0	A_42_P592013	NM_001127600	1200.37	277.735	1.055536e+003	1.056089e+002	1009	40.5	1.030283e+001	0	0	0	0	0	0	993.667	1	1	46.5243	40.7
DATA	1222	15	32	0	1	ETG02_36680	ETG02_36680	1226.42	278.427	3.431914e+000	3.428609e+000	65	41.5	8.923414e+000	0	0	0	0	0	0	2.50746	0	0	57.5363	41.3158
DATA	1223	15	33	0	0	A_42_P608478	NM_001025131	1251.58	278.427	7.613375e+001	8.346103e+000	136	43	9.807458e+000	0	0	0	0	0	0	71.6336	1	1	57.5363	41.1538
DATA	1224	15	34	0	0	A_44_P137397	NM_017236	1277	278.455	5.820880e+004	5.820881e+003	54609	40	1.047411e+001	0	0	0	0	0	0	54732.9	1	1	55.8519	41.7241
DATA	1226	15	36	0	0	A_64_P110789	A_64_P110789	1327.58	278.427	9.632661e+000	3.561406e+000	72	41.5	6.092745e+000	0	0	0	0	0	0	9.03945	1	0	65	41.8077
DATA	1227	15	37	0	0	A_64_P061562	A_64_P061562	1352.96	277.945	1.408409e+003	1.408828e+002	1308	38	4.782752e+000	0	0	0	0	0	0	1319.84	1	1	46.8651	38.4333
DATA	1228	15	38	0	0	A_44_P511359	NM_001108736	1378.17	278	2.784988e+002	2.806138e+001	321.5	38	3.532202e+000	0	0	0	0	0	0	260.58	1	1	46.8651	38.2917
DATA	1229	15	39	0	0	A_42_P658220	NM_001109598	1403.62	278.258	1.179030e+003	1.179533e+002	1191	42	8.613555e+000	0	0	0	0	0	0	1101.21	1	1	46.1809	43.12
DATA	1230	15	40	0	0	A_42_P479096	NM_001008293	1429.12	278.258	5.952682e+002	5.962683e+001	622.5	39	1.021553e+001	0	0	0	0	0	0	554.85	1	1	45.835	41.0968
DATA	1231	15	41	0	0	A_64_P275280	NM_001109569	1454.38	278.237	3.953204e+003	3.953355e+002	3574	40.5	8.026590e+000	0	0	0	0	0	0	3676.57	1	1	49.1849	38.8846
DATA	1232	15	42	0	0	A_42_P785926	NM_001108289	1480.06	278.389	6.048682e+002	6.058617e+001	606	34	7.612320e+000	0	0	0	0	0	0	561.154	1	1	48.2044	35.1471
DATA	1233	15	43	0	0	A_64_P005238	A_64_P005238	1505.5	278.5	3.648479e+001	5.040215e+000	97.5	36	7.414893e+000	0	0	0	0	0	0	33.758	1	1	57.5363	37.2258
DATA	1234	15	44	0	0	A_42_P555753	NM_001106401	1530.31	278.417	2.407326e+003	2.407578e+002	2174	41	5.881811e+000	0	0	0	0	0	0	2221.16	1	1	48.5334	40.0645
DATA	1235	15	45	0	0	A_42_P469751	XM_001054007	1555.97	278.084	1.623988e+002	1.661236e+001	212	41	9.780114e+000	0	0	0	0	0	0	149.372	1	1	46.8651	40.5294
DATA	1236	15	46	0	0	A_44_P506124	XM_222590	1581.28	278.275	1.733381e+003	1.733736e+002	1630	40	7.225762e+000	0	0	0	0	0	0	1589.2	1	1	46.8651	39.2857
DATA	1237	15	47	0	0	A_44_P441947	XM_001079870	1606.8	278.314	9.649047e+002	9.655471e+001	924	40	5.949359e+000	0	0	0	0	0	0	881.594	1	1	47.2035	40.8
DATA	1238	15	48	0	0	A_64_P127659	NM_001106228	1632.11	278.56	1.973122e+003	1.973439e+002	1833	40.5	8.930501e+000	0	0	0	0	0	0	1796.32	1	1	48.8603	41.2
DATA	1239	15	49	0	0	A_42_P733076	NM_001033867	1657.67	278.5	2.067209e+002	2.097430e+001	253	42	8.457199e+000	0	0	0	0	0	0	187.48	1	1	65	43.7037
DATA	1240	15	50	0	0	A_64_P145939	NM_001109499	1683.29	279.19	6.008885e+001	6.985125e+000	118	41	9.774678e+000	0	0	0	0	0	0	54.2831	1	1	45.1352	41.5172
DATA	1241	15	51	0	0	A_44_P1040796	NM_001106660	1708.07	278.732	8.622610e+003	8.622684e+002	7813	44	7.423110e+000	0	0	0	0	0	0	7758.11	1	1	47.5395	42.1111
DATA	1242	15	52	0	0	A_42_P588072	NM_001106829	1734	278.545	5.127784e+001	6.260491e+000	112	41.5	8.461562e+000	0	0	0	0	0	0	45.937	1	1	55.8519	41.0882
DATA	1243	15	53	0	0	A_64_P045823	ENSRNOT00000023172	1759.42	278.573	1.281101e+002	1.330919e+001	175	44	8.390912e+000	0	0	0	0	0	0	114.267	1	1	57.5363	43.5
DATA	1244	15	54	0	0	A_42_P591344	NM_001037780	1784.58	278.573	1.207827e+002	1.261005e+001	170	42.5	9.759131e+000	0	0	0	0	0	0	107.254	1	1	57.5363	40.1765
DATA	1245	15	55	0	0	A_64_P120322	A_64_P120322	1810.42	278.573	3.654888e+000	3.640330e+000	63	39	7.755659e+000	0	0	0	0	0	0	-2.42749	0	0	65	39.3103
DATA	1246	15	56	0	0	A_64_P062665	NM_001170470	1835.44	278.639	3.110058e+002	3.131486e+001	332.5	41	7.281166e+000	0	0	0	0	0	0	273.619	1	1	48.2044	39.8462
DATA	1247	15	57	0	0	A_44_P398300	NM_001005538	1860.69	278.662	1.435660e+003	1.436130e+002	1269	39	6.640099e+000	0	0	0	0	0	0	1257.11	1	1	48.5334	39
DATA	1248	15	58	0	0	A_64_P001545	ENSRNOT00000029141	1886.19	279.043	2.164102e+004	2.164106e+003	18889.5	41.5	7.927599e+000	0	0	0	0	0	0	18858.5	1	1	46.8651	41.8056
DATA	1249	15	59	0	0	A_44_P1010653	NM_001109021	1911.26	278.711	2.474415e+003	2.474694e+002	2147.5	39.5	8.781209e+000	0	0	0	0	0	0	2145.8	1	1	49.5074	39.7353
DATA	1250	15	60	0	0	A_44_P398969	NM_001013225	1936.87	278.9	3.577291e+002	3.596671e+001	362	42	1.004486e+001	0	0	0	0	0	0	308.687	1	1	46.8651	41.5625
DATA	1251	15	61	0	0	A_64_P059495	NM_001109986	1962.15	278.785	3.044855e+003	3.045086e+002	2538	40	7.400295e+000	0	0	0	0	0	0	2614.46	1	1	45.835	40.1667
DATA	1252	15	62	0	0	A_64_P037040	A_64_P037040	1988	279	2.043073e+002	2.077494e+001	243	42	7.870751e+000	0	0	0	0	0	0	174.547	1	1	46.8651	42.1111
DATA	1253	15	63	0	0	A_64_P051446	NM_001142942	2013.09	278.896	4.502386e+003	4.502545e+002	3800	40	7.497883e+000	0	0	0	0	0	0	3827.67	1	1	46.8651	40.6944
DATA	1254	15	64	0	0	A_42_P701756	NM_001107646	2038.5	279	1.490893e+003	1.491378e+002	1302	39.5	1.001292e+001	0	0	0	0	0	0	1261.23	1	1	48.5334	39.5
DATA	1255	15	65	0	0	A_44_P172604	NM_031795	2063.72	278.905	2.066691e+003	2.067044e+002	1769	40	7.135554e+000	0	0	0	0	0	0	1739.8	1	1	48.8603	38.871
DATA	1256	15	66	0	0	A_64_P152000	A_64_P152000	2089.5	279	3.856253e+000	3.840893e+000	64	38	8.176678e+000	0	0	0	0	0	0	-1.06712	0	0	54.1152	38.5161
DATA	1257	15	67	0	0	A_44_P339008	NM_001024975	2114.6	278.971	3.971647e+002	3.990352e+001	393.5	45	8.670925e+000	0	0	0	0	0	0	331.134	1	1	46.1809	43.4194
DATA	1258	15	68	0	0	A_44_P560070	A_44_P560070	2140.35	279.149	7.683538e+000	3.952825e+000	71.5	41	9.291529e+000	0	0	0	0	0	0	6.37585	1	0	48.8603	42.2414
DATA	1259	15	69	0	0	A_44_P520509	NM_001033868	2165.59	278.851	4.214654e+003	4.214834e+002	3486	40	1.010280e+001	0	0	0	0	0	0	3481.34	1	1	48.5334	41.931
DATA	1260	15	70	0	0	A_42_P643349	NM_001109495	2191.04	278.896	3.625299e+001	5.334011e+000	93	39	6.288868e+000	0	0	0	0	0	0	29.8121	1	1	46.8651	39.6296
DATA	1261	15	71	0	0	A_44_P215075	NM_012667	2216.36	278.928	5.043880e+001	6.393855e+000	105	40	7.329720e+000	0	0	0	0	0	0	41.3002	1	1	46.5243	40.7813
DATA	1262	15	72	0	0	A_44_P560363	ENSRNOT00000049736	2241.65	278.8	1.595312e+003	1.595800e+002	1373	38	9.761745e+000	0	0	0	0	0	0	1300.89	1	1	45.4864	40.3333
DATA	1263	15	73	0	0	A_44_P553158	NM_001014014	2267.42	279.427	9.234463e+002	9.242955e+001	810	40.5	7.532611e+000	0	0	0	0	0	0	750.07	1	1	57.5363	41.1333
DATA	1264	15	74	0	0	A_64_P165277	NM_001106370	2292.58	279.427	7.530511e+000	4.046574e+000	68.5	43.5	9.857718e+000	0	0	0	0	0	0	6.09412	1	0	57.5363	44.2857
DATA	1265	15	75	0	0	A_64_P138187	A_64_P138187	2318	279.191	9.698595e+002	9.706799e+001	850	42	9.713659e+000	0	0	0	0	0	0	782.104	1	1	46.8651	43.7
DATA	1266	15	76	0	0	A_44_P429041	XM_227654	2343.27	279.343	2.563155e+002	2.594220e+001	269	36.5	7.539269e+000	0	0	0	0	0	0	206.035	1	1	46.1809	37.3333
DATA	1267	15	77	0	0	A_44_P465880	NM_199389	2368.73	278.643	1.791515e+003	1.791965e+002	1496	40.5	1.178572e+001	0	0	0	0	0	0	1435.69	1	1	46.8651	43.75
DATA	1268	15	78	0	0	A_44_P381740	NM_001000239	2394.42	279.427	1.365413e+001	4.250580e+000	72	43	9.979425e+000	0	0	0	0	0	0	10.914	1	0	65	42.9565
DATA	1269	15	79	0	0	A_64_P045211	NM_001191733	2419.58	279.427	1.468872e+001	4.293627e+000	72	43	7.755490e+000	0	0	0	0	0	0	11.7141	1	0	57.5363	45.0476
DATA	1270	15	80	0	0	A_64_P010896	A_64_P010896	2445	279.455	7.447593e+000	4.110513e+000	69	42	1.005590e+001	0	0	0	0	0	0	5.92773	1	0	55.8519	43.0606
DATA	1271	15	81	0	0	A_42_P566906	NM_001006966	2470.34	279.122	1.457722e+003	1.458285e+002	1197	43.5	1.041671e+001	0	0	0	0	0	0	1158.35	1	1	48.8603	42.7143
DATA	1272	15	82	66	1	DarkCorner	DarkCorner	2495.58	279.427	4.069859e+000	4.053649e+000	61	46	1.327323e+001	0	0	0	0	0	0	-1.31064	0	0	57.5363	44.3514
DATA	1273	15	83	66	1	DarkCorner	DarkCorner	2521.17	279.805	4.072722e+000	4.056986e+000	62	39	6.285908e+000	0	0	0	0	0	0	0.498312	0	0	50.7771	39.0667
DATA	1274	15	84	66	1	DarkCorner	DarkCorner	2546.58	279.427	4.074102e+000	4.057875e+000	58	44	9.785130e+000	0	0	0	0	0	0	-3.65381	0	0	57.5363	43.0345
DATA	1275	15	85	66	1	DarkCorner	DarkCorner	2572	279.455	4.073273e+000	4.057049e+000	58	42	1.036399e+001	0	0	0	0	0	0	-3.48021	0	0	55.8519	42.2927
DATA	1276	16	1	66	1	DarkCorner	DarkCorner	451.5	285	7.457063e+000	3.776643e+000	64.5	51	1.361982e+001	0	0	0	0	0	0	6.48064	1	0	54.1152	50.9787
DATA	1277	16	2	66	1	DarkCorner	DarkCorner	477.221	284.935	3.700992e+000	3.691959e+000	63	42	8.084614e+000	0	0	0	0	0	0	1.79126	0	0	49.1849	42.8049
DATA	1278	16	3	66	1	DarkCorner	DarkCorner	501.762	284.952	3.685633e+000	3.675748e+000	63	34.5	7.166667e+000	0	0	0	0	0	0	1.64516	0	0	45.4864	35.1944
DATA	1279	16	4	66	1	DarkCorner	DarkCorner	527.877	285.281	3.669213e+000	3.654599e+000	58	38	6.858375e+000	0	0	0	0	0	0	-4.25579	0	0	42.5954	37.1389
DATA	1280	16	5	0	0	A_42_P708614	NM_001130505	553.5	285	2.332204e+004	2.332206e+003	20727.5	37	8.073980e+000	0	0	0	0	0	0	20620.1	1	1	54.1152	37.6786
DATA	1281	16	6	0	0	A_44_P427177	NM_053923	578.74	285.247	3.828401e+000	3.643951e+000	64.5	37	7.137837e+000	0	0	0	0	0	0	3.39919	1	0	48.2044	36.4444
DATA	1282	16	7	0	0	A_44_P417051	NM_001024886	604.088	285.386	6.051380e+001	7.045714e+000	112	39	8.479474e+000	0	0	0	0	0	0	53.9537	1	1	65	37.5172
DATA	1283	16	8	0	0	A_64_P052917	ENSRNOT00000029053	629.5	285.352	2.635183e+001	4.456611e+000	85	34	9.982986e+000	0	0	0	0	0	0	23.591	1	1	57.5363	37.92
DATA	1284	16	9	0	0	A_42_P689013	NM_053800	654.565	284.768	7.779975e+003	7.780058e+002	7024	37.5	1.014023e+001	0	0	0	0	0	0	6991.78	1	1	46.8651	39.0417
DATA	1285	16	10	0	0	A_42_P668072	NM_013130	680.418	285.427	2.364224e+002	2.390962e+001	274	38	9.426640e+000	0	0	0	0	0	0	213.336	1	1	65	37.6923
DATA	1286	16	11	0	0	A_44_P762596	XM_237156	705.298	285.328	1.528893e+002	1.569624e+001	205.5	34	6.637887e+000	0	0	0	0	0	0	138.47	1	1	46.1809	34.3077
DATA	1287	16	12	0	0	A_44_P673662	TC577636	730.676	285.382	8.548211e+001	9.252038e+000	139	37	8.465277e+000	0	0	0	0	0	0	77.7051	1	1	46.5243	35.8333
DATA	1288	16	13	0	0	A_42_P674598	NM_013067	756.418	285.427	2.169726e+004	2.169729e+003	19771	37	1.236604e+001	0	0	0	0	0	0	19794.2	1	1	57.5363	38.4324
DATA	1289	16	14	0	0	A_44_P529994	NM_001191720	781.688	285.104	7.665203e+000	3.597721e+000	68	39	6.433088e+000	0	0	0	0	0	0	7.01624	1	0	49.8279	38.2308
DATA	1290	16	15	0	0	A_42_P655644	NM_133618	806.809	284.735	9.216122e+002	9.222781e+001	866	38	6.486629e+000	0	0	0	0	0	0	846.256	1	1	46.1809	36.8276
DATA	1291	16	16	0	0	A_42_P589674	NM_001044225	832.433	284.761	2.506235e+003	2.506479e+002	2372	38	7.350815e+000	0	0	0	0	0	0	2308.49	1	1	46.5243	38.0345
DATA	1292	16	17	0	0	A_64_P010139	A_64_P010139	858	285.455	2.603720e+002	2.626907e+001	301	37.5	9.284048e+000	0	0	0	0	0	0	240.553	1	1	55.8519	38
DATA	1293	16	18	0	0	A_42_P586883	NM_001106416	883.418	285.427	3.893266e+001	5.217270e+000	96.5	39	6.744651e+000	0	0	0	0	0	0	36.0676	1	1	57.5363	39.9032
DATA	1294	16	19	0	0	A_42_P461144	DV724416	908.311	285.662	1.001545e+003	1.002144e+002	968.5	34	7.276337e+000	0	0	0	0	0	0	930.19	1	1	48.5334	35.1515
DATA	1295	16	20	0	0	A_64_P130565	NM_031668	934.333	285.5	9.315330e+001	9.935771e+000	147.5	36	7.716991e+000	0	0	0	0	0	0	86.7243	1	1	57.5363	35.641
DATA	1296	16	21	0	0	A_64_P002826	NM_001134527	959.2	285.24	1.082443e+002	1.136058e+001	165	38.5	6.689845e+000	0	0	0	0	0	0	100.984	1	1	48.8603	39.2667
DATA	1298	16	23	0	0	A_64_P036099	A_64_P036099	1009.77	285.116	1.812890e+003	1.813216e+002	1774	39	6.635391e+000	0	0	0	0	0	0	1697.53	1	1	46.5243	38.1818
DATA	1299	16	24	0	0	A_64_P080580	ENSRNOT00000040473	1035.41	285.284	4.809543e+002	4.821764e+001	505	39.5	7.737047e+000	0	0	0	0	0	0	451.055	1	1	48.5334	40.4063
DATA	1300	16	25	0	0	A_43_P12276	NM_022636	1061.11	285.5	3.559250e+001	4.940333e+000	95	44.5	1.294077e+001	0	0	0	0	0	0	33.4249	1	1	56.9804	44.7222
DATA	1301	16	26	0	0	A_42_P505393	NM_199085	1086.04	285.347	3.636914e+002	3.652983e+001	395	44.5	1.475953e+001	0	0	0	0	0	0	341.903	1	1	48.5334	47.5333
DATA	1302	16	27	0	0	A_44_P883619	ENSRNOT00000032374	1111.89	285.5	3.433172e+000	3.419566e+000	65	43.5	9.930200e+000	0	0	0	0	0	0	0.203335	0	0	65	42.3125
DATA	1303	16	28	0	0	A_44_P493894	ENSRNOT00000050156	1137.42	285.573	1.889442e+005	1.889442e+004	177828	44	1.300900e+001	0	0	0	0	0	0	177898	1	1	57.5363	47.6552
DATA	1304	16	29	0	0	A_64_P085334	TC585414	1162.38	285.276	5.061131e+003	5.061246e+002	4613	40	8.582775e+000	0	0	0	0	0	0	4766.99	1	1	49.1849	39.8696
DATA	1306	16	31	0	0	A_64_P045433	A_64_P045433	1213.12	285.343	2.809250e+003	2.809457e+002	2680	41	9.316990e+000	0	0	0	0	0	0	2646.29	1	1	45.835	41.1622
DATA	1307	16	32	0	0	A_64_P025351	AY724474	1238.63	285.36	1.720924e+004	1.720927e+003	16400	40	7.836470e+000	0	0	0	0	0	0	16206.1	1	1	48.8603	38.8974
DATA	1308	16	33	0	0	A_44_P501626	ENSRNOT00000050744	1264.42	285.573	8.883674e+000	3.532004e+000	73	40	8.731090e+000	0	0	0	0	0	0	8.36147	1	0	57.5363	40.3429
DATA	1309	16	34	0	0	A_64_P071525	NM_001000141	1289.58	285.573	3.434746e+000	3.433600e+000	65.5	39	1.369235e+001	0	0	0	0	0	0	2.75677	0	0	57.5363	42.3636
DATA	1310	16	35	0	0	A_64_P006545	A_64_P006545	1314.74	285.543	7.708080e+003	7.708156e+002	7220	41.5	5.659660e+000	0	0	0	0	0	0	7242.25	1	1	47.2035	42.5714
DATA	1311	16	36	0	0	A_64_P089561	NM_001044265	1340.4	285.612	5.030997e+001	6.088268e+000	112	41	6.846091e+000	0	0	0	0	0	0	47.211	1	1	46.1809	40.6
DATA	1312	16	37	0	0	A_44_P791108	NM_001014070	1365.58	285.573	2.626748e+001	4.323206e+000	88.5	39	5.388603e+000	0	0	0	0	0	0	24.6137	1	1	57.5363	39
DATA	1313	16	38	0	0	A_44_P161535	A_44_P161535	1391.12	285.657	3.365853e+003	3.366029e+002	3312	41	6.998333e+000	0	0	0	0	0	0	3148.61	1	1	45.835	41.68
DATA	1314	16	39	0	0	A_44_P299136	NM_001108539	1416.37	285.5	2.646250e+002	2.668594e+001	306.5	42	1.076869e+001	0	0	0	0	0	0	247.071	1	1	47.8731	42.7308
DATA	1315	16	40	1028	1	(+)E1A_r60_a97	E1A_r60_a97	1441.91	285.614	3.467286e+000	3.453475e+000	62	40	8.866164e+000	0	0	0	0	0	0	-1.26634	0	0	65	38.8125
DATA	1316	16	41	0	0	A_44_P161723	NM_001134526	1467.3	285.773	7.142755e+001	7.937334e+000	129	35	8.276387e+000	0	0	0	0	0	0	66.392	1	1	45.4864	35.963
DATA	1317	16	42	0	0	A_64_P121443	A_64_P121443	1493.33	285.875	3.544974e+000	3.488681e+000	66	36	8.784029e+000	0	0	0	0	0	0	3.28644	1	0	45.1352	37.7027
DATA	1318	16	43	0	0	A_42_P771373	NM_012614	1517.86	285.789	4.495639e+003	4.495773e+002	4052.5	40	6.563921e+000	0	0	0	1	0	0	4156.61	1	1	47.2035	37.8667
DATA	1319	16	44	0	0	A_44_P1025944	NM_147140	1543	285.797	6.857501e+003	6.857589e+002	6146	41	8.177616e+000	0	0	0	0	0	0	6321.79	1	1	46.8651	40.2105
DATA	1320	16	45	0	0	A_64_P014085	NM_001007678	1568.37	285.873	6.512585e+002	6.521990e+001	649	42	8.958687e+000	0	0	0	0	0	0	598.496	1	1	47.5395	40.4839
DATA	1321	16	46	0	0	A_64_P095298	NM_001047963	1594.19	285.94	3.928202e+001	5.269961e+000	101	40	5.638516e+000	0	0	0	0	0	0	35.9771	1	1	46.1809	40.0833
DATA	1322	16	47	0	0	A_64_P122037	A_64_P122037	1619.51	285.87	1.304891e+004	1.304896e+003	11851	40	5.299783e+000	0	0	0	0	0	0	11909.1	1	1	47.2035	39.9063
DATA	1323	16	48	0	0	A_64_P098094	A_64_P098094	1645.5	286	5.359377e+004	5.359378e+003	48402	40.5	9.804336e+000	0	0	0	0	0	0	48728	1	1	54.1152	42.4375
DATA	1324	16	49	0	0	A_44_P353708	ENSRNOT00000033510	1670.45	286.016	5.739972e+001	6.750243e+000	114.5	42	8.656295e+000	0	0	0	0	0	0	51.9908	1	1	44.0646	43.8125
DATA	1325	16	50	0	0	A_42_P541669	ENSRNOT00000043345	1695.91	286.065	6.296873e+002	6.306965e+001	633	41	6.578754e+000	0	0	0	0	0	0	568.062	1	1	54.4085	42
DATA	1326	16	51	0	0	A_42_P560894	NM_019138	1720.83	286	3.106469e+003	3.106675e+002	2828	40	7.889613e+000	0	0	0	0	0	0	2791.02	1	1	46.8651	39.7647
DATA	1327	16	52	0	0	A_42_P498066	NM_031136	1746.5	286	6.554172e+004	6.554173e+003	57982	44	5.982411e+000	0	0	0	0	0	0	58631.3	1	1	54.1152	43.4516
DATA	1328	16	53	0	0	A_42_P538928	NM_053021	1771.74	285.783	1.008377e+004	1.008384e+003	8821	44	6.855558e+000	0	0	0	1	0	0	8980.89	1	1	46.8651	43.9643
DATA	1329	16	54	0	0	A_64_P302169	NM_001099493	1797.54	286.138	3.153708e+001	4.807989e+000	91.5	38	8.061792e+000	0	0	0	0	0	0	27.9598	1	1	45.1352	38.7027
DATA	1330	16	55	0	0	A_43_P18282	NM_001173436	1822.74	285.757	6.533518e+001	7.482002e+000	121	39	6.009873e+000	0	0	0	0	0	0	57.6565	1	1	46.8651	38.1304
DATA	1331	16	56	0	0	A_44_P304169	NM_001000482	1848.37	285.647	1.686533e+002	1.725863e+001	210.5	38	6.861604e+000	0	0	0	0	0	0	148.123	1	1	46.5243	37.5667
DATA	1332	16	57	0	0	A_44_P318932	XM_231081	1873.36	286.13	2.942820e+003	2.943050e+002	2643.5	39	8.661734e+000	0	0	0	0	0	0	2572.55	1	1	46.8651	39.5556
DATA	1333	16	58	0	0	A_64_P124621	A_64_P124621	1899.09	286.386	1.029324e+002	1.093759e+001	155	35	8.615929e+000	0	0	0	0	0	0	89.542	1	1	57.259	36.6486
DATA	1334	16	59	0	0	A_42_P553960	NM_001107831	1924.07	286.28	4.625826e+003	4.625976e+002	3984.5	39	9.290266e+000	0	0	0	0	0	0	4004.65	1	1	48.8603	39.4872
DATA	1335	16	60	0	0	A_64_P129459	A_64_P129459	1949.44	286.26	6.333850e+002	6.344853e+001	607	38	8.199528e+000	0	0	0	0	0	0	545.631	1	1	49.5074	39.9677
DATA	1336	16	61	0	0	A_64_P083224	ENSRNOT00000017383	1975.18	286.104	2.622320e+001	4.579087e+000	86.5	38	6.731406e+000	0	0	0	0	0	0	22.4765	1	1	46.1809	37.3871
DATA	1337	16	62	0	0	A_64_P031840	NM_001017445	2000.38	286	8.221008e+002	8.229659e+001	750	43	6.993293e+000	0	0	0	0	0	0	701.172	1	1	48.5334	43.1154
DATA	1338	16	63	0	0	A_43_P16427	NM_001191000	2026	286.455	4.091999e+001	5.578270e+000	99	37	7.753787e+000	0	0	0	0	0	0	34.7286	1	1	55.8519	37.6061
DATA	1339	16	64	0	0	A_64_P159034	NM_001191681	2051.12	285.956	1.800902e+004	1.800906e+003	15225.5	39	6.588270e+000	0	0	0	0	0	0	15209.2	1	1	46.8651	38.9697
DATA	1340	16	65	0	0	A_64_P009007	A_64_P009007	2076.67	286.5	4.522819e+001	5.925535e+000	102	40	7.254336e+000	0	0	0	0	0	0	38.012	1	1	57.5363	39.9444
DATA	1341	16	66	0	0	A_42_P489817	NM_001107681	2101.99	286.357	2.130478e+003	2.130825e+002	1820	40.5	1.000984e+001	0	0	0	0	0	0	1781.96	1	1	46.8651	39.4444
DATA	1342	16	67	0	0	A_42_P643272	NM_053389	2127.5	286.5	1.484821e+003	1.485324e+002	1304	44	7.839523e+000	0	0	0	0	0	0	1236.06	1	1	57.5363	43.3793
DATA	1343	16	68	0	0	A_64_P076063	XM_001061753	2153	286.455	7.063937e+001	8.060856e+000	124	40	9.002991e+000	0	0	0	0	0	0	58.5319	1	1	55.8519	41.5769
DATA	1344	16	69	0	0	A_64_P047371	NM_001109423	2178.21	286.265	1.444713e+003	1.445239e+002	1280	40	7.764863e+000	0	0	0	0	0	0	1191.72	1	1	46.1809	40.3103
DATA	1345	16	70	0	0	A_44_P991940	XM_225667	2203.67	286.5	8.148938e+001	9.041716e+000	132	39	8.154951e+000	0	0	0	0	0	0	66.9273	1	1	57.5363	40.3548
DATA	1346	16	71	0	0	A_42_P667802	ENSRNOT00000014585	2229.33	286.5	9.372963e+001	1.016518e+001	143.5	39	8.635216e+000	0	0	0	0	0	0	76.6536	1	1	57.5363	40.4815
DATA	1347	16	72	0	0	A_44_P433942	A_44_P433942	2254.35	286.477	2.510794e+001	4.680388e+000	83	39.5	9.413612e+000	0	0	0	0	0	0	20.4523	1	1	45.4864	41.2667
DATA	1348	16	73	0	0	A_42_P735279	NM_001004446	2279.57	286.392	1.379572e+004	1.379577e+003	10850	41	8.222857e+000	0	0	0	0	0	0	11194.9	1	1	49.1849	43.3333
DATA	1349	16	74	0	0	A_64_P000316	A_64_P000316	2305.42	286.573	6.724052e+001	7.813400e+000	118	43	1.036502e+001	0	0	0	0	0	0	54.3656	1	1	57.5363	43.6061
DATA	1350	16	75	0	0	A_64_P073357	XM_001070426	2330.74	286.385	6.547584e+001	7.669045e+000	115	36	6.710333e+000	0	0	0	0	0	0	52.7608	1	1	45.1352	37.8571
DATA	1351	16	76	0	0	A_42_P501972	NM_001025418	2355.69	286.465	2.901076e+002	2.928591e+001	294.5	39	7.793514e+000	0	0	0	1	0	0	233.064	1	1	47.8731	39.5588
DATA	1352	16	77	0	0	A_64_P030824	ENSRNOT00000002002	2382.09	286.524	8.614319e+001	9.504721e+000	130	42	1.165081e+001	0	0	0	0	0	0	69.005	1	1	50.7771	45.7931
DATA	1353	16	78	0	0	A_42_P537715	NM_001025743	2406.62	286.367	1.383328e+003	1.383914e+002	1146	45	6.270832e+000	0	0	0	0	0	0	1105.45	1	1	50.7771	45.36
DATA	1354	16	79	0	0	A_44_P596424	TC642059	2432.13	286.487	1.230987e+002	1.295428e+001	163.5	42	8.845833e+000	0	0	0	0	0	0	98.1613	1	1	50.1463	43.9655
DATA	1355	16	80	0	0	A_42_P528891	XM_001074805	2457.59	286.746	1.466952e+002	1.521618e+001	184	45	8.911856e+000	0	0	0	1	0	0	116.774	1	1	47.5395	46.2759
DATA	1356	16	81	0	0	A_64_P130516	A_64_P130516	2483.11	286.5	1.067829e+002	1.141970e+001	147	41	1.108140e+001	0	0	0	0	0	0	84.8825	1	1	65	41.9063
DATA	1357	16	82	66	1	DarkCorner	DarkCorner	2508.73	286.227	4.067914e+000	4.051712e+000	58	41	8.443385e+000	0	0	0	0	0	0	-3.56928	0	0	45.4864	41.6571
DATA	1358	16	83	66	1	DarkCorner	DarkCorner	2533.86	286.593	4.069764e+000	4.053554e+000	57	38	7.293124e+000	0	0	0	0	0	0	-4.13015	0	0	56.9804	39.2414
DATA	1359	16	84	66	1	DarkCorner	DarkCorner	2559.31	286.081	4.070212e+000	4.055301e+000	63	45	9.660367e+000	0	0	0	0	0	0	0.815136	0	0	54.9904	45.0286
DATA	1360	16	85	66	1	DarkCorner	DarkCorner	2584.68	286.485	4.206739e+000	4.073683e+000	65.5	38	8.637047e+000	0	0	0	0	0	0	3.34046	1	0	46.5243	38.9362
DATA	1361	17	1	66	1	DarkCorner	DarkCorner	438.051	291.763	4.887920e+000	3.737798e+000	65	54	1.817346e+001	0	0	0	0	1	0	4.24399	1	0	43.7019	56.6272
DATA	1362	17	2	66	1	DarkCorner	DarkCorner	464.418	292.427	3.703667e+000	3.705124e+000	62.5	41	8.813309e+000	0	0	0	0	0	0	3.01954	0	0	57.5363	43
DATA	1363	17	3	66	1	DarkCorner	DarkCorner	489.661	291.984	3.688340e+000	3.673649e+000	61	38	8.384942e+000	0	0	0	0	0	0	-1.56433	0	0	44.0646	38.7368
DATA	1364	17	4	66	1	DarkCorner	DarkCorner	515.333	292.5	3.672176e+000	3.657549e+000	56	38.5	7.306628e+000	0	0	0	0	0	0	-3.89664	0	0	57.5363	36.6471
DATA	1365	17	5	0	0	A_44_P434817	NM_001012187	540.368	291.735	1.734404e+003	1.734787e+002	1545	37	7.346881e+000	0	0	0	0	0	0	1531.91	1	1	46.5243	37.32
DATA	1366	17	6	0	0	A_64_P153319	A_64_P153319	565.677	292.015	4.624099e+002	4.638306e+001	464	37	8.750108e+000	0	0	0	0	0	0	410.154	1	1	45.4864	37.4242
DATA	1367	17	7	0	0	A_64_P034394	XM_218828	591.418	292.427	1.882288e+001	4.073017e+000	77	38	6.535306e+000	0	0	0	0	0	0	16.7672	1	1	57.5363	38.0909
DATA	1368	17	8	0	0	A_64_P001399	A_64_P001399	616.5	292.265	8.098365e+003	8.098445e+002	7062.5	40	8.703277e+000	0	0	0	0	0	0	7242.86	1	1	46.5243	37.7391
DATA	1369	17	9	0	0	A_42_P712191	NM_001109207	642.107	292.5	9.811362e+001	1.044511e+001	150	35	1.039840e+001	0	0	0	0	0	0	88.1071	1	1	56.9804	38.72
DATA	1370	17	10	0	0	A_44_P746633	NM_001109580	667.123	292.397	6.148843e+003	6.148947e+002	5373	41	8.871302e+000	0	0	0	0	0	0	5542.97	1	1	48.5334	40.3
DATA	1371	17	11	0	0	A_42_P772157	NM_017020	692.397	292.562	5.787495e+002	5.798407e+001	567	37	6.391451e+000	0	0	0	0	0	0	523.718	1	1	48.2044	35.2273
DATA	1372	17	12	0	0	A_44_P407543	NM_001024996	717.931	292.556	1.246541e+002	1.295898e+001	177	34	7.041658e+000	0	0	0	0	0	0	113.221	1	1	48.2044	34.4194
DATA	1374	17	14	0	0	A_64_P057225	NM_001008857	769.107	292.5	1.300892e+002	1.347608e+001	188	39	1.170144e+001	0	0	0	0	0	0	118.995	1	1	56.9804	40.069
DATA	1375	17	15	0	0	A_42_P462015	NM_001011943	794.329	292.315	2.084723e+002	2.114000e+001	246	39	5.855807e+000	0	0	0	0	0	0	191.313	1	1	48.2044	38.2381
DATA	1376	17	16	0	0	A_42_P596050	NM_053572	819.667	292.5	3.300920e+002	3.319372e+001	364.5	38	6.573652e+000	0	0	0	0	0	0	303.879	1	1	57.5363	37.7097
DATA	1377	17	17	0	0	A_44_P213776	NM_052829	844.91	292.462	1.281884e+002	1.328406e+001	181	39	8.856269e+000	0	0	0	0	0	0	118.358	1	1	50.1463	38.8276
DATA	1378	17	18	0	0	A_64_P004468	A_64_P004468	870.438	292.6	5.145702e+003	5.145819e+002	4842	40	8.596024e+000	0	0	0	0	0	0	4764.57	1	1	50.7771	39.9655
DATA	1379	17	19	0	0	A_44_P290394	NM_053580	895.736	292.778	1.495982e+003	1.496383e+002	1443.5	38	5.222470e+000	0	0	0	0	0	0	1388.83	1	1	47.5395	38.375
DATA	1380	17	20	0	0	A_64_P076911	XM_215948	921.098	293.197	8.550423e+001	9.222891e+000	143	36.5	7.351614e+000	0	0	0	0	0	0	79.5771	1	1	44.7812	35.8158
DATA	1381	17	21	0	0	A_64_P155895	NM_001009658	946.348	292.333	1.532623e+003	1.533011e+002	1432.5	36.5	7.680801e+000	0	0	0	0	0	0	1429.43	1	1	47.2035	37.5714
DATA	1382	17	22	0	0	A_43_P16338	ENSRNOT00000034555	972.092	292.646	6.719378e+001	7.549912e+000	129	39	7.179648e+000	0	0	0	0	0	0	62.8014	1	1	45.1352	39.1212
DATA	1383	17	23	0	0	A_42_P716283	NM_001107983	997.308	292.538	2.910757e+002	2.930970e+001	334	38	7.725589e+000	0	0	0	0	0	0	272.542	1	1	45.1352	38.4483
DATA	1384	17	24	0	0	A_43_P13355	NM_139082	1023	292.545	7.225280e+001	7.998388e+000	126	40	7.426836e+000	0	0	0	0	0	0	67.7634	1	1	55.8519	40.3684
DATA	1385	17	25	0	0	A_64_P126065	NM_001005900	1048.35	292.333	4.881350e+001	5.963608e+000	109	40	9.030645e+000	0	0	0	0	0	0	45.8438	1	1	50.7771	41.0541
DATA	1386	17	26	0	0	A_44_P838532	NM_001107144	1073.57	292.605	4.090153e+002	4.104442e+001	448.5	51	1.518002e+001	0	0	0	0	0	0	384.596	1	1	49.5074	50.5417
DATA	1387	17	27	0	0	A_42_P785861	NM_001009422	1098.69	292.662	1.689875e+003	1.690221e+002	1667.5	41	7.794308e+000	0	0	0	0	0	0	1590.51	1	1	48.5334	41.4138
DATA	1388	17	28	0	0	A_42_P641962	NM_012999	1124.5	292.648	2.282578e+003	2.282834e+002	2198	43.5	1.024907e+001	0	0	0	0	0	0	2149.98	1	1	65	43.5
DATA	1389	17	29	0	0	A_64_P085201	TC633318	1149.91	292.935	5.490834e+001	6.465716e+000	117	45	1.195230e+001	0	0	0	0	0	0	51.7463	1	1	54.4085	45.3704
DATA	1390	17	30	0	0	A_64_P015687	NM_053573	1175.06	292.687	3.973687e+003	3.973834e+002	3732	36	6.429101e+000	0	0	0	0	0	0	3745.8	1	1	45.835	37
DATA	1391	17	31	0	0	A_64_P078332	NM_012794	1200.55	293	2.523347e+001	4.244513e+000	84	41	9.661933e+000	0	0	0	0	0	0	23.7881	1	1	49.8279	41
DATA	1392	17	32	0	0	A_42_P637189	NM_031612	1225.93	292.786	4.114343e+003	4.114485e+002	3839.5	40	7.226476e+000	0	0	0	0	0	0	3877.87	1	1	46.8651	38.6829
DATA	1393	17	33	0	0	A_42_P602472	NM_001008290	1251.09	292.896	1.543407e+003	1.543785e+002	1485.5	39.5	9.417309e+000	0	0	0	0	0	0	1454.11	1	1	46.8651	39.3333
DATA	1394	17	34	0	0	A_64_P003749	NM_031799	1277	293	6.699205e+001	7.520484e+000	129	40	1.020092e+001	0	0	0	0	0	0	63.0744	1	1	54.9904	40.6061
DATA	1395	17	35	0	0	A_42_P785861	NM_001009422	1302.01	292.912	1.673770e+003	1.674119e+002	1592	42	8.968493e+000	0	0	0	0	0	0	1574.5	1	1	46.8651	43.2857
DATA	1396	17	36	0	0	A_64_P138889	NM_001013050	1327.44	293.027	2.245617e+003	2.245878e+002	2103	43	6.910954e+000	0	0	0	0	0	0	2110.09	1	1	48.5334	42.8065
DATA	1397	17	37	0	0	A_44_P409820	NM_012908	1353.09	293.065	2.222974e+001	4.086386e+000	85.5	38	6.678495e+000	0	0	0	0	0	0	20.8597	1	1	54.4085	38.1333
DATA	1398	17	38	0	0	A_44_P529880	ENSRNOT00000033370	1378.5	293	3.448015e+000	3.438468e+000	66	39.5	5.754570e+000	0	0	0	0	0	0	1.58939	0	0	54.1152	39.8214
DATA	1399	17	39	0	0	A_64_P084851	ENSRNOT00000029593	1403.55	292.884	1.311342e+002	1.355723e+001	191	39	8.007408e+000	0	0	0	0	0	0	122.638	1	1	47.5395	40.1304
DATA	1400	17	40	0	0	A_44_P654068	NM_001114402	1429.17	293	2.456408e+002	2.480481e+001	283.5	39.5	1.034819e+001	0	0	0	0	0	0	229.259	1	1	46.8651	40.4667
DATA	1401	17	41	0	0	A_64_P094855	NM_001109591	1454.73	292.643	2.029890e+003	2.030184e+002	1964.5	37	8.340235e+000	0	0	0	0	0	0	1890.19	1	1	46.8651	36.6786
DATA	1402	17	42	0	0	A_42_P516658	NM_001024888	1479.57	293.1	2.307151e+002	2.333003e+001	276.5	35	8.751897e+000	0	0	0	0	0	0	214.33	1	1	47.5395	38.0645
DATA	1403	17	43	0	0	A_64_P092394	ENSRNOT00000064749	1505.5	293.352	1.812830e+001	3.917511e+000	79	37	8.596597e+000	0	0	0	0	0	0	16.7955	1	1	57.5363	37.4828
DATA	1404	17	44	0	0	A_44_P280755	NM_148890	1530.58	293.427	5.792084e+001	6.758480e+000	120	40.5	7.225762e+000	0	0	0	0	0	0	53.5114	1	1	57.5363	39.2857
DATA	1405	17	45	0	0	A_42_P629062	AF072835	1556.09	292.672	4.328668e+002	4.342743e+001	461	41	9.980351e+000	0	0	0	0	0	0	398.658	1	1	45.1352	40.4737
DATA	1406	17	46	0	0	A_64_P131141	ENSRNOT00000012638	1581.71	292.7	3.549032e+001	4.988106e+000	100.5	42	1.021984e+001	0	0	0	0	0	0	32.5786	1	1	46.8651	42.5152
DATA	1407	17	47	0	0	A_42_P756350	NM_021772	1607	293.455	6.929071e+001	7.770470e+000	126	40	5.367164e+000	0	0	0	0	0	0	63.3932	1	1	55.8519	40.1613
DATA	1408	17	48	66	-1	(-)3xSLv1	NegativeControl	1632.42	293.427	3.543693e+000	3.529579e+000	59	39	4.716284e+000	0	0	0	0	0	0	-4.97018	0	0	57.5363	38.92
DATA	1409	17	49	0	0	A_64_P124796	A_64_P124796	1657.58	293.427	1.982152e+001	4.059606e+000	82	42	9.241921e+000	0	0	0	0	0	0	18.0016	1	1	65	43.5185
DATA	1410	17	50	0	0	A_44_P288443	NM_001108878	1682.97	293.061	2.376202e+002	2.402676e+001	282	42	5.813336e+000	0	0	0	0	0	0	214.948	1	1	46.8651	42.4444
DATA	1411	17	51	0	0	A_42_P748004	NM_001135873	1708.28	293.2	9.068197e+002	9.075226e+001	855	36	8.038261e+000	0	0	0	0	0	0	816.979	1	1	49.1849	36.6364
DATA	1412	17	52	0	0	A_64_P067310	NM_001139507	1734	293.455	1.900262e+003	1.900600e+002	1757	42	7.325868e+000	0	0	0	0	0	0	1704.74	1	1	55.8519	41.4063
DATA	1413	17	53	0	0	A_44_P210809	NM_001107334	1759.42	293.427	1.815290e+002	1.850685e+001	223	44	6.814887e+000	0	0	0	0	0	0	162.143	1	1	57.5363	44.5217
DATA	1414	17	54	1028	1	(+)E1A_r60_a104	E1A_r60_a104	1784.67	293.5	3.632678e+000	3.618209e+000	59.5	43	1.062559e+001	0	0	0	0	0	0	-5.502	0	0	65	41.3548
DATA	1415	17	55	0	0	A_44_P1042711	NM_001108426	1810.33	293.5	6.802903e+001	7.713139e+000	123	37	6.220561e+000	0	0	0	0	0	0	60.2162	1	1	57.5363	37.8462
DATA	1416	17	56	0	0	A_42_P661992	TC596141	1835.26	293.411	1.557002e+002	1.599251e+001	198.5	37.5	7.195148e+000	0	0	0	0	0	0	137.188	1	1	48.5334	37.3125
DATA	1417	17	57	0	0	A_42_P565621	NM_001105971	1860.89	293.5	3.168191e+001	4.847732e+000	92	39	7.712978e+000	0	0	0	0	0	0	27.7817	1	1	56.9804	39.5185
DATA	1418	17	58	0	0	A_44_P264600	NM_001013132	1885.91	293.559	5.956643e+001	7.005206e+000	118	38	8.139178e+000	0	0	0	0	0	0	51.9866	1	1	46.8651	39.0606
DATA	1419	17	59	0	0	A_64_P034901	TC591400	1911.89	293.292	5.125772e+000	3.740452e+000	69	34	7.806806e+000	0	0	0	0	0	0	4.45115	1	0	45.835	35.6286
DATA	1420	17	60	0	0	A_42_P468216	NM_001030026	1937.33	293.5	1.189365e+003	1.189947e+002	1075	40	9.213354e+000	0	0	0	1	0	0	1027.78	1	1	57.5363	40.9459
DATA	1421	17	61	0	0	A_64_P062855	XM_343708	1962.5	293.5	1.797920e+001	4.151193e+000	81	39	7.585311e+000	0	0	0	0	0	0	15.4607	1	0	57.5363	39.5862
DATA	1422	17	62	0	0	A_64_P048421	AABR03055399	1987.89	293.5	3.775250e+000	3.760213e+000	58	37	9.663316e+000	0	0	0	0	0	0	-6.18227	0	0	65	37.8824
DATA	1423	17	63	0	0	A_44_P342166	NM_013187	2013.42	293.573	1.343629e+002	1.395759e+001	181	37	9.708549e+000	0	0	0	1	0	0	114.401	1	1	57.5363	38.4516
DATA	1424	17	64	0	0	A_42_P748154	XM_001059949	2038.23	293.288	2.002034e+003	2.002394e+002	1725	36	7.522805e+000	0	0	0	0	0	0	1696.37	1	1	45.4864	37.1481
DATA	1425	17	65	0	0	A_64_P157763	A_64_P157763	2064.11	293.5	7.424201e+002	7.434002e+001	651	40	8.223350e+000	0	0	0	0	0	0	625.957	1	1	56.9804	40.4615
DATA	1426	17	66	0	0	A_64_P155645	NM_022706	2088.99	293.616	9.841760e+003	9.841835e+002	7993	35	9.251469e+000	0	0	0	0	0	0	8258.8	1	1	48.8603	36.6944
DATA	1427	17	67	0	0	A_42_P622436	NM_022298	2114.89	293.5	5.594592e+004	5.594593e+003	46762.5	44	9.411418e+000	0	0	0	0	0	0	46719.4	1	1	56.9804	42.1143
DATA	1428	17	68	0	0	A_44_P304190	NM_001014044	2140.42	293.573	1.164703e+002	1.227347e+001	160.5	40	1.171352e+001	0	0	0	0	0	0	96.8076	1	1	57.5363	43.04
DATA	1429	17	69	1028	1	(+)E1A_r60_a104	E1A_r60_a104	2165.58	293.573	3.904102e+000	3.888552e+000	61	39.5	6.899275e+000	0	0	0	0	0	0	-3.32145	0	0	57.5363	38
DATA	1430	17	70	0	0	A_42_P771373	NM_012614	2190.75	293.356	4.400893e+003	4.401066e+002	3619	38	7.463621e+000	0	0	0	1	0	0	3625.39	1	1	48.5334	39.8125
DATA	1431	17	71	0	0	A_64_P101976	A_64_P101976	2216.5	293.648	2.175027e+001	4.485273e+000	81	38	7.671200e+000	0	0	0	0	0	0	17.8406	1	1	57.5363	40.2258
DATA	1432	17	72	0	0	A_42_P777935	ENSRNOT00000027369	2241.71	294.119	1.482373e+002	1.533800e+001	184	35	6.624989e+000	0	0	0	0	0	0	121.103	1	1	43.7019	36.0952
DATA	1433	17	73	0	0	A_64_P041521	NM_012945	2267.42	293.573	1.215880e+002	1.278567e+001	159	38	6.836767e+000	0	0	0	0	0	0	98.932	1	1	57.5363	38.5
DATA	1434	17	74	0	0	A_44_P102661	NM_138862	2292.21	293.6	6.938366e+002	6.949707e+001	611	40.5	9.484602e+000	0	0	0	0	0	0	562.513	1	1	49.1849	41.5714
DATA	1435	17	75	0	0	A_42_P714166	NM_001017491	2318.09	293.614	3.998655e+000	3.982728e+000	59	39	5.728031e+000	0	0	0	0	0	0	-2.50731	0	0	65	38.8966
DATA	1436	17	76	0	0	A_64_P098703	NM_198728	2343.23	293.913	5.921606e+002	5.935069e+001	544	39	9.614704e+000	0	0	0	0	0	0	476.885	1	1	46.5243	40.5938
DATA	1437	17	77	0	0	A_44_P624151	NM_001107932	2368.61	293.931	3.473816e+002	3.496850e+001	342	41	8.722809e+000	0	0	0	0	0	0	278.939	1	1	53.8203	42.8286
DATA	1438	17	78	0	0	A_42_P674843	NM_001008880	2394.07	293.786	1.232206e+003	1.232860e+002	1008	46	1.657470e+001	0	0	0	0	0	0	986.807	1	1	46.8651	49.4815
DATA	1439	17	79	0	0	A_44_P1039634	NM_001108924	2419.43	293.9	7.776064e+001	8.756852e+000	126.5	44.5	1.053259e+001	0	0	0	0	0	0	62.1324	1	1	47.5395	45.1538
DATA	1440	17	80	0	0	A_42_P517253	NM_001012275	2444.73	293.925	3.131451e+002	3.157335e+001	318.5	49	8.519554e+000	0	0	0	1	0	0	249.725	1	1	45.835	47.871
DATA	1441	17	81	0	0	A_42_P485589	NM_017246	2470.5	294	1.269949e+002	1.332692e+001	167	46	9.218660e+000	0	0	0	0	0	0	101.115	1	1	65	46.125
DATA	1442	17	82	66	1	DarkCorner	DarkCorner	2495.5	294	4.061804e+000	4.045626e+000	56.5	41.5	1.345200e+001	0	0	0	0	0	0	-6.19441	0	0	65	43.2059
DATA	1443	17	83	66	1	DarkCorner	DarkCorner	2521.5	294	4.064833e+000	4.048643e+000	58	41	4.680088e+000	0	0	0	0	0	0	-3.39548	0	0	65	40.6452
DATA	1444	17	84	66	1	DarkCorner	DarkCorner	2545.87	293.85	4.065985e+000	4.049790e+000	55	44	9.093410e+000	0	0	0	0	0	0	-6.00699	0	0	44.4243	43.4894
DATA	1445	17	85	66	1	DarkCorner	DarkCorner	2572	294	4.065024e+000	4.048833e+000	57	41.5	1.035325e+001	0	0	0	0	0	0	-3.33924	0	0	54.9904	42.2917
DATA	1446	18	1	66	1	DarkCorner	DarkCorner	451.048	299.53	3.706780e+000	3.702795e+000	62.5	42.5	9.780209e+000	0	0	0	0	0	0	2.46046	0	0	51.0895	43.4167
DATA	1447	18	2	66	1	DarkCorner	DarkCorner	476.944	299.264	3.691097e+000	3.676395e+000	57.5	40	4.275787e+000	0	0	0	0	0	0	-3.31174	0	0	47.5395	38.8
DATA	1448	18	3	66	1	DarkCorner	DarkCorner	502.418	299.573	3.675321e+000	3.660682e+000	62	36	7.883023e+000	0	0	0	0	0	0	-0.277572	0	0	57.5363	36.2727
DATA	1449	18	4	0	0	A_42_P608713	TC595074	527.569	300.262	3.297381e+002	3.317467e+001	354.5	37	9.542456e+000	0	0	0	0	0	0	291.063	1	1	45.835	35.4615
DATA	1450	18	5	0	0	A_44_P411771	XM_001056376	552.846	299.785	4.186727e+002	4.202436e+001	428.5	40	7.193037e+000	0	0	0	0	0	0	371.073	1	1	45.835	38.8387
DATA	1451	18	6	0	0	A_42_P703647	NM_001108688	578.338	299.465	1.521545e+001	3.922539e+000	76	40	7.910793e+000	0	0	0	0	0	0	13.5409	1	0	47.8731	38.7742
DATA	1452	18	7	0	0	A_64_P139212	NM_001030052	603.806	299.611	1.133728e+004	1.133733e+003	10256	39	7.755532e+000	0	0	0	0	0	0	10131.1	1	1	47.8731	38.3
DATA	1453	18	8	0	0	A_64_P082461	FQ211879	629.5	299.648	9.047837e+001	9.732557e+000	139.5	39	9.220712e+000	0	0	0	0	0	0	81.1814	1	1	57.5363	38.6923
DATA	1454	18	9	0	0	A_64_P144053	NM_001108100	654.514	299.689	2.699176e+002	2.722711e+001	298.5	38	9.117776e+000	0	0	0	0	0	0	243.122	1	1	49.1849	38.5769
DATA	1455	18	10	0	0	A_42_P455802	NM_001013929	680.042	299.859	2.334829e+003	2.335100e+002	2122	39	8.457738e+000	0	0	0	0	0	0	2111.21	1	1	46.8651	38.3333
DATA	1456	18	11	0	0	A_44_P575367	ENSRNOT00000068160	705.5	300	1.096443e+001	3.710668e+000	72.5	34.5	8.092922e+000	0	0	0	0	0	0	9.9516	1	0	54.1152	35.8462
DATA	1457	18	12	0	0	A_64_P008259	ENSRNOT00000040453	730.708	299.754	2.616520e+003	2.616759e+002	2469	38	7.492361e+000	0	0	0	0	0	0	2383.25	1	1	45.1352	38.2759
DATA	1458	18	13	0	0	A_44_P433935	NM_001024894	756.412	299.368	3.534285e+000	3.521757e+000	64	39	1.080474e+001	0	0	0	0	0	0	0.954844	0	0	45.835	39.5
DATA	1459	18	14	0	0	A_64_P027747	TC585156	781.338	299.676	4.564083e+003	4.564218e+002	4193.5	42	9.547054e+000	0	0	0	0	0	0	4185.5	1	1	47.5395	44.3478
DATA	1460	18	15	0	0	A_44_P247880	ENSRNOT00000032333	806.803	299.426	1.098133e+001	3.665784e+000	71	36.5	6.965280e+000	0	0	0	0	0	0	10.1024	1	0	42.9674	36.5313
DATA	1461	18	16	0	0	A_44_P422321	NM_001105813	832.5	299.821	1.061342e+003	1.061914e+002	1002.5	38	6.533712e+000	0	0	0	0	0	0	979.446	1	1	49.1849	37.2424
DATA	1462	18	17	0	0	A_44_P374824	ENSRNOT00000025777	858	300	2.469407e+001	4.264235e+000	85	39	8.731571e+000	0	0	0	0	0	0	22.8548	1	1	54.9904	37.6286
DATA	1463	18	18	0	0	A_64_P029482	A_64_P029482	883.014	300.197	6.505114e+001	7.371416e+000	126	39	7.419937e+000	0	0	0	0	0	0	60.3671	1	1	46.8651	39.3429
DATA	1464	18	19	0	0	A_64_P083918	NM_053396	908.068	300.123	1.572748e+001	3.799423e+000	78	38	5.489578e+000	0	0	0	0	0	0	14.6311	1	0	46.8651	38.2759
DATA	1465	18	20	1028	1	(+)E1A_r60_3	E1A_r60_3	933.94	300.657	2.014711e+001	3.995405e+000	81.5	37	7.357984e+000	0	0	0	0	0	0	18.7881	1	1	44.7812	36.2647
DATA	1466	18	21	0	0	A_42_P508415	CV108834	959.208	299.806	1.121825e+002	1.173480e+001	165	39	7.200465e+000	0	0	0	0	0	0	104.827	1	1	47.5395	40.1765
DATA	1467	18	22	0	0	A_64_P018331	NM_001107720	984.69	299.977	1.504125e+003	1.504517e+002	1427.5	40	7.595295e+000	0	0	0	0	0	0	1408.24	1	1	50.7771	38.9667
DATA	1468	18	23	0	0	A_64_P142056	NM_001011938	1009.7	299.746	5.771370e+003	5.771472e+002	5254	40	9.505445e+000	0	0	0	0	0	0	5412.46	1	1	45.835	41.3947
DATA	1469	18	24	0	0	A_44_P1030098	NM_001105866	1035.58	300.427	1.089097e+002	1.141693e+001	161.5	39	8.124392e+000	0	0	0	0	0	0	102.301	1	1	57.5363	40.1667
DATA	1470	18	25	0	0	A_64_P125958	NM_177933	1061.09	300.386	5.227023e+001	6.246991e+000	113.5	36	1.461095e+001	0	0	0	0	0	0	49.1614	1	1	65	42.5625
DATA	1471	18	26	0	0	A_64_P002066	XM_001056138	1086.5	299.926	4.462153e+001	5.620514e+000	106	50	1.832369e+001	0	0	0	0	0	0	42.0103	1	1	46.5243	50.8485
DATA	1472	18	27	0	0	A_42_P521242	ENSRNOT00000003841	1111.58	299.845	2.703557e+002	2.725037e+001	319	43	9.194635e+000	0	0	0	0	0	0	254.743	1	1	47.5395	41.8148
DATA	1473	18	28	0	0	A_42_P652827	NM_001024274	1136.97	300.307	1.672951e+003	1.673299e+002	1578	45.5	1.431734e+001	0	0	0	0	0	0	1577.38	1	1	49.1849	47.8846
DATA	1474	18	29	0	0	A_42_P533792	NM_001106575	1162.38	300	5.833610e+003	5.833710e+002	5334	38	7.678324e+000	0	0	0	0	0	0	5502.32	1	1	48.5334	38.96
DATA	1475	18	30	1028	1	(+)E1A_r60_1	E1A_r60_1	1188	300.455	3.424204e+000	3.410565e+000	61	40	8.485281e+000	0	0	0	0	0	0	-3.36656	0	0	65	39
DATA	1476	18	31	0	0	A_64_P210103	NM_001100666	1213.42	300.427	7.330558e+001	8.085232e+000	131	37	7.598594e+000	0	0	0	0	0	0	69.1504	1	1	57.5363	37.3636
DATA	1477	18	32	0	0	A_64_P131745	A_64_P131745	1238.87	300.608	4.991778e+001	6.046376e+000	109	41	6.652067e+000	0	0	0	0	0	0	47.0743	1	1	50.1463	41
DATA	1478	18	33	0	0	A_64_P017791	XM_002727063	1263.94	300.321	3.427443e+000	3.415696e+000	64.5	39	8.501364e+000	0	0	0	0	0	0	1.07476	0	0	49.8279	38.7188
DATA	1479	18	34	0	0	A_42_P560288	NM_198788	1289.25	300.342	5.969679e+003	5.969776e+002	5551	39	1.046695e+001	0	0	0	0	0	0	5622.11	1	1	48.2044	39.9032
DATA	1480	18	35	0	0	A_42_P571463	NM_001013221	1315	300.455	8.573534e+002	8.580352e+001	843	41.5	9.986230e+000	0	0	0	0	0	0	806.62	1	1	55.8519	42.7813
DATA	1481	18	36	0	0	A_42_P648207	NM_001013882	1340.5	300.5	4.796584e+002	4.808790e+001	508	42	6.896313e+000	0	0	0	0	0	0	450.715	1	1	57.5363	41.6774
DATA	1482	18	37	0	0	A_64_P120833	NM_131910	1365.42	300.122	7.110442e+003	7.110524e+002	6429	41	5.217869e+000	0	0	0	0	0	0	6671.54	1	1	48.5334	39.8846
DATA	1483	18	38	0	0	A_42_P705337	TC582694	1391.03	299.857	2.152219e+003	2.152493e+002	2067.5	41	9.941424e+000	0	0	0	0	0	0	2015.88	1	1	46.8651	42.2963
DATA	1484	18	39	0	0	A_44_P544340	NM_001034939	1416.29	300.118	2.679101e+002	2.701115e+001	314	38	9.677418e+000	0	0	0	0	0	0	250.467	1	1	45.835	40.037
DATA	1486	18	41	0	0	A_44_P310596	NM_001014166	1467.05	300.392	5.662809e+002	5.673351e+001	585	37	7.607779e+000	0	0	0	0	0	0	527.061	1	1	49.1849	38.2143
DATA	1487	18	42	0	0	A_64_P013409	A_64_P013409	1492.38	301.092	3.479396e+000	3.465537e+000	61	36	8.434440e+000	0	0	0	0	0	0	-3.00709	0	0	45.1352	38.1613
DATA	1488	18	43	0	0	A_64_P076485	A_64_P076485	1518.19	300.481	2.508781e+003	2.509022e+002	2386	42	7.068501e+000	0	0	0	0	0	0	2322.57	1	1	49.8279	40.6875
DATA	1489	18	44	0	0	A_64_P096121	ENSRNOT00000028891	1543.24	300.662	3.654155e+001	5.049960e+000	97	41	9.179112e+000	0	0	0	0	0	0	33.7313	1	1	47.5395	40.5122
DATA	1490	18	45	0	0	A_42_P521086	NM_001100857	1568.4	300.836	5.397928e+001	6.431374e+000	115	41.5	9.540093e+000	0	0	0	0	0	0	49.6734	1	1	48.5334	41.6765
DATA	1491	18	46	0	0	A_64_P143133	TC637520	1594.09	300.286	4.855712e+001	5.990571e+000	107	40	7.482237e+000	0	0	0	0	0	0	44.5309	1	1	46.8651	39.375
DATA	1492	18	47	0	0	A_64_P067163	NM_017248	1619.58	300.573	3.198696e+004	3.198698e+003	28721	40	5.231026e+000	0	0	0	0	0	0	29232.1	1	1	57.5363	39
DATA	1493	18	48	0	0	A_64_P118288	NM_053448	1644.82	300.493	3.925853e+002	3.941725e+001	403	38	6.580858e+000	0	0	0	0	0	0	357.459	1	1	47.8731	39
DATA	1494	18	49	0	0	A_64_P112342	A_64_P112342	1670.84	300.299	4.987088e+001	6.120241e+000	107	43	7.390134e+000	0	0	0	0	0	0	45.2292	1	1	45.835	42.8529
DATA	1495	18	50	0	0	A_64_P074741	NM_001077680	1696	300.545	4.443963e+001	5.695156e+000	105	41	8.116759e+000	0	0	0	0	0	0	40.1448	1	1	55.8519	39.8966
DATA	1496	18	51	0	0	A_64_P153062	NM_001107890	1721.42	300.573	1.137008e+002	1.191933e+001	166	36	8.039785e+000	0	0	0	0	0	0	102.287	1	1	57.5363	37.7059
DATA	1497	18	52	0	0	A_64_P051942	A_64_P051942	1746.46	300.916	3.244306e+002	3.264125e+001	357	42	4.925288e+000	0	0	0	0	0	0	290.643	1	1	47.8731	41.4615
DATA	1498	18	53	0	0	A_44_P233080	ENSRNOT00000026303	1771.69	300.662	4.745812e+003	4.745949e+002	4198.5	41	8.146155e+000	0	0	0	0	0	0	4232.92	1	1	48.5334	40.2121
DATA	1499	18	54	0	0	A_64_P127747	A_64_P127747	1797.31	300.611	2.054834e+002	2.086544e+001	244	40.5	8.327617e+000	0	0	0	0	0	0	182.443	1	1	48.2044	40.3571
DATA	1500	18	55	0	0	A_42_P773155	NM_001106996	1822.63	300.596	2.648180e+004	2.648182e+003	23128	38	9.840761e+000	0	0	0	0	0	0	23404.5	1	1	57.8122	39.6667
DATA	1501	18	56	0	0	A_64_P003624	NM_175591	1847.79	300.699	3.030136e+001	4.749652e+000	89	38	7.206404e+000	0	0	0	0	0	0	26.656	1	1	48.2044	37.3529
DATA	1502	18	57	0	0	A_64_P148728	NM_030989	1872.96	300.676	2.258164e+002	2.287870e+001	264	38	9.137469e+000	0	0	0	0	0	0	197.712	1	1	46.8651	37.92
DATA	1503	18	58	0	0	A_44_P436284	ENSRNOT00000031389	1898.62	301.137	2.496029e+002	2.523197e+001	276	34	8.499968e+000	0	0	0	0	0	0	217.483	1	1	48.5334	35.129
DATA	1504	18	59	0	0	A_42_P626851	NM_001107917	1924	300.797	6.273003e+002	6.283969e+001	590	40	9.896791e+000	0	0	0	0	0	0	543.896	1	1	46.8651	40.0889
DATA	1505	18	60	0	0	A_42_P797303	TC587453	1949.5	300.944	9.316998e+003	9.317073e+002	7810.5	36	5.871683e+000	0	0	0	0	0	0	8038.56	1	1	48.5334	36.68
DATA	1506	18	61	0	0	A_64_P096312	A_64_P096312	1975.16	300.714	4.548121e+003	4.548276e+002	4143	36	7.670392e+000	0	0	0	0	0	0	3904.42	1	1	45.1352	36.7222
DATA	1507	18	62	0	0	A_64_P150894	A_64_P150894	2000.22	300.866	2.307182e+002	2.337719e+001	260.5	35	9.625906e+000	0	0	0	0	0	0	197.104	1	1	46.1809	36.4839
DATA	1508	18	63	0	0	A_64_P241372	NM_001000593	2026	301	1.754479e+001	4.171907e+000	80	35	7.880105e+000	0	0	0	0	0	0	14.9141	1	0	54.9904	37.1034
DATA	1509	18	64	0	0	A_44_P433621	NM_001025016	2050.97	300.846	2.217280e+002	2.249664e+001	249	40	6.447374e+000	0	0	0	0	0	0	187.573	1	1	45.835	40.3529
DATA	1510	18	65	0	0	A_64_P163511	NM_013190	2076.87	301	1.008660e+003	1.009384e+002	917.5	38	7.810136e+000	0	0	0	0	0	0	849.088	1	1	48.5334	38.8235
DATA	1511	18	66	0	0	A_44_P129412	AF155959	2101.91	300.948	8.731025e+002	8.739466e+001	789	35	9.993166e+000	0	0	0	0	0	0	731.509	1	1	47.8731	37.5676
DATA	1512	18	67	0	0	A_64_P143037	NM_001025134	2127.5	301	4.310513e+002	4.327749e+001	416	43	9.523147e+000	0	0	0	0	0	0	359.44	1	1	54.1152	41.9032
DATA	1513	18	68	0	0	A_64_P032693	XM_002724830	2152.37	301	1.121025e+001	4.034848e+000	72.5	40	8.694472e+000	0	0	0	0	0	0	9.30579	1	0	49.1849	39.9231
DATA	1514	18	69	0	0	A_42_P727368	NM_001025693	2178.28	300.892	4.575797e+001	6.008308e+000	102	37	7.028230e+000	0	0	0	0	0	0	37.8104	1	1	45.835	38.3704
DATA	1515	18	70	0	0	A_64_P075765	A_64_P075765	2203.44	300.968	2.207303e+001	4.490541e+000	78	40	6.880751e+000	0	0	0	0	0	0	18.161	1	1	44.0646	39.963
DATA	1516	18	71	0	0	A_42_P639174	NM_001106592	2228.8	300.638	1.119014e+003	1.119703e+002	952.5	37	8.666913e+000	0	0	0	0	0	0	916.809	1	1	46.5243	38.3462
DATA	1517	18	72	0	0	A_64_P063135	NM_001109623	2254.37	300.985	5.151110e+001	6.486913e+000	107	35	6.737457e+000	0	0	0	0	0	0	42.0349	1	1	45.4864	36.68
DATA	1518	18	73	0	0	A_64_P018236	NM_001108882	2279.91	301.386	3.973598e+000	3.957776e+000	63	38.5	8.764086e+000	0	0	0	0	0	0	0.0496013	0	0	57.259	39.4667
DATA	1519	18	74	0	0	A_43_P14648	NM_001012034	2305.03	301.127	7.930086e+002	7.940027e+001	667	37	6.469532e+000	0	0	0	0	0	0	642.385	1	1	46.8651	38.375
DATA	1520	18	75	0	0	A_42_P698520	NM_001108216	2330.71	301.171	6.334397e+003	6.334522e+002	5044	39.5	1.019259e+001	0	0	0	0	0	0	5114	1	1	50.7771	41.5
DATA	1521	18	76	0	0	A_43_P19450	NM_001105713	2355.93	301.014	1.421457e+002	1.476600e+001	179.5	39	8.548570e+000	0	0	0	1	0	0	114.408	1	1	46.8651	40.1463
DATA	1522	18	77	0	0	A_64_P013012	XM_225619	2381.44	300.875	3.375214e+002	3.398937e+001	329	43	1.052986e+001	0	0	0	0	0	0	270.899	1	1	44.4243	45.9706
DATA	1523	18	78	0	0	A_42_P499684	NM_001108642	2406.89	301.5	2.535826e+002	2.567467e+001	263.5	46	9.318152e+000	0	0	0	1	0	0	203.045	1	1	56.9804	45.1935
DATA	1524	18	79	0	0	A_64_P297479	ENSRNOT00000044350	2432.09	301.086	1.546304e+004	1.546309e+003	12229.5	47	8.495729e+000	0	0	0	0	0	0	12354.7	1	1	46.8651	45.625
DATA	1525	18	80	0	0	A_64_P103238	NM_001014158	2457.63	301.37	2.042530e+002	2.081984e+001	231	49	8.323242e+000	0	0	0	0	0	0	162.914	1	1	48.2044	47.2593
DATA	1526	18	81	0	0	A_42_P751562	NM_001037355	2482.84	301.234	3.926833e+003	3.927041e+002	3105	44.5	1.037268e+001	0	0	0	0	0	0	3127.79	1	1	49.5074	43.5
DATA	1527	18	82	66	1	DarkCorner	DarkCorner	2508.5	301.5	4.059331e+000	4.043163e+000	61	40.5	8.073865e+000	0	0	0	0	0	0	-2.5931	0	0	57.5363	39.8889
DATA	1528	18	83	66	1	DarkCorner	DarkCorner	2533.67	301.5	4.061323e+000	4.045147e+000	59.5	41	6.608660e+000	0	0	0	0	0	0	-2.73917	0	0	57.5363	41.9756
DATA	1529	18	84	66	1	DarkCorner	DarkCorner	2559.42	301.427	4.061456e+000	4.045279e+000	60.5	43.5	1.065917e+001	0	0	0	0	0	0	-3.027	0	0	57.5363	43.65
DATA	1530	18	85	66	1	DarkCorner	DarkCorner	2584.5	301.5	4.059498e+000	4.043329e+000	61	39	8.352050e+000	0	0	0	0	0	0	-1.05695	0	0	57.5363	39.4316
DATA	1531	19	1	66	1	DarkCorner	DarkCorner	438.862	306.569	6.981109e+000	3.759630e+000	67	44.5	1.073013e+001	0	0	0	0	0	0	6.08022	1	0	44.7812	44.957
DATA	1532	19	2	66	1	DarkCorner	DarkCorner	463.851	307	3.693579e+000	3.678893e+000	60	38	5.475458e+000	0	0	0	0	0	0	0.121348	0	0	46.8651	37.2258
DATA	1533	19	3	66	1	DarkCorner	DarkCorner	489.685	307.123	3.677873e+000	3.663224e+000	57	39	7.161307e+000	0	0	0	0	0	0	-4.44214	0	0	48.5334	38.5588
DATA	1534	19	4	66	1	DarkCorner	DarkCorner	514.754	306.918	3.662926e+000	3.648337e+000	59	36	1.048761e+001	0	0	0	0	0	0	-3.55076	0	0	44.7812	35.36
DATA	1535	19	5	0	0	A_44_P198705	NM_012578	540.298	306.776	6.996914e+003	6.997008e+002	6278.5	37	8.492248e+000	0	0	0	0	0	0	6196.3	1	1	45.835	37.5806
DATA	1536	19	6	0	0	A_42_P604252	NM_001108797	565.863	306.808	6.875312e+002	6.884826e+001	655	40	8.505297e+000	0	0	0	0	0	0	611.392	1	1	47.5395	40.2308
DATA	1537	19	7	0	0	A_43_P20016	NM_001107377	591.21	307	8.063065e+001	8.831631e+000	136	38	7.094732e+000	0	0	0	0	0	0	71.9954	1	1	45.4864	37.9091
DATA	1538	19	8	0	0	A_42_P491486	NM_022533	616.443	306.9	2.865267e+003	2.865491e+002	2576.5	40	6.464519e+000	0	0	0	0	0	0	2568.57	1	1	47.8731	39.96
DATA	1539	19	9	0	0	A_64_P345929	NM_001191639	642.093	307.065	2.282597e+001	4.241437e+000	81.5	40	8.259915e+000	0	0	0	0	0	0	20.5443	1	1	54.4085	40.8214
DATA	1540	19	10	0	0	A_64_P152047	NM_001000521	667.5	307.352	6.879174e+000	3.626807e+000	70	39	7.252873e+000	0	0	0	0	0	0	6.21568	1	0	57.5363	36.6667
DATA	1541	19	11	0	0	A_42_P724510	NM_001007625	692.565	306.768	8.998471e+003	8.998541e+002	7961	37.5	9.039533e+000	0	0	0	1	0	0	8159.98	1	1	46.8651	39.35
DATA	1542	19	12	0	0	A_42_P552906	NM_001007701	717.937	306.825	1.564344e+003	1.564743e+002	1463.5	33.5	8.937543e+000	0	0	0	0	0	0	1423.75	1	1	45.4864	35.3824
DATA	1543	19	13	0	0	A_64_P121673	A_64_P121673	742.328	306.875	5.477338e+000	3.565603e+000	68	38	5.915058e+000	0	0	0	0	0	0	5.00199	1	0	45.1352	37.3421
DATA	1544	19	14	0	0	A_64_P047470	NM_001008875	769.088	307.386	2.656965e+001	4.402616e+000	86	39	1.073710e+001	0	0	0	0	0	0	24.3522	1	1	57.259	41.2162
DATA	1545	19	15	0	0	A_43_P14911	NM_031512	794.5	307.352	1.707401e+001	3.893496e+000	77	37.5	1.159051e+001	0	0	0	1	0	0	15.6997	1	0	57.5363	40.5
DATA	1546	19	16	0	0	A_44_P117234	NM_001191788	819.582	307.427	1.702947e+001	3.881941e+000	77	38	9.297936e+000	0	0	0	0	0	0	15.7068	1	0	57.5363	38.5806
DATA	1547	19	17	0	0	A_64_P066782	ENSRNOT00000046676	845.063	306.906	2.987208e+002	3.007393e+001	341	38	9.347257e+000	0	0	0	0	0	0	276.311	1	1	45.835	37.3939
DATA	1548	19	18	0	0	A_64_P125013	NM_019167	870.582	307.427	4.461410e+004	4.461412e+003	41435	40	6.829884e+000	0	0	0	0	0	0	41384.2	1	1	57.5363	39.7742
DATA	1549	19	19	0	0	A_64_P143121	NM_001099510	896	307.455	9.077259e+000	3.576776e+000	74	40	6.302244e+000	0	0	0	0	0	0	8.44189	1	0	65	40.5806
DATA	1550	19	20	0	0	A_64_P065600	NM_022954	920.508	307.769	3.465361e+000	3.451558e+000	58.5	38	6.674547e+000	0	0	0	0	0	0	-4.29539	0	0	45.835	37.4571
DATA	1551	19	21	0	0	A_44_P300818	AF030087	946.567	306.701	4.181212e+002	4.195373e+001	459	39	8.397260e+000	0	0	0	0	0	0	390.605	1	1	46.1809	39.7742
DATA	1552	19	22	0	0	A_64_P103130	A_64_P103130	972	306.855	1.762716e+003	1.763051e+002	1791	38	6.128871e+000	0	0	0	0	0	0	1650.05	1	1	45.4864	38.7838
DATA	1553	19	23	0	0	A_64_P064938	NM_001109332	997.5	307.5	6.974388e+000	3.500915e+000	68.5	42	1.030455e+001	0	0	0	0	0	0	6.54092	1	0	57.5363	41.6061
DATA	1554	19	24	0	0	A_64_P087276	NM_138527	1023	307.455	3.438977e+000	3.425279e+000	58	38	8.421694e+000	0	0	0	0	0	0	-6.26485	0	0	55.8519	39.2703
DATA	1555	19	25	0	0	A_64_P032728	NM_001037778	1048.01	306.916	9.444075e+003	9.444137e+002	8554	39	9.462946e+000	0	0	0	0	0	0	8882.79	1	1	46.8651	40.2121
DATA	1556	19	26	0	0	A_44_P956203	NM_001134992	1073.67	307.5	6.289210e+000	3.474003e+000	68.5	46	1.524174e+001	0	0	0	0	0	0	5.92274	1	0	65	46.1852
DATA	1557	19	27	0	0	A_64_P106488	A_64_P106488	1099.33	307.5	3.730263e+001	5.056273e+000	96	44	1.019019e+001	0	0	0	0	0	0	35.1623	1	1	57.5363	44
DATA	1558	19	28	0	0	A_43_P10011	NM_001025274	1124.36	307.258	4.217632e+002	4.231403e+001	466	47	1.366870e+001	0	0	0	0	0	0	397.834	1	1	46.1809	48.2
DATA	1559	19	29	0	0	A_44_P321009	NM_012540	1149.89	307.5	5.916175e+000	3.460236e+000	67	43	8.504207e+000	0	0	0	0	0	0	5.58339	1	0	56.9804	42.8077
DATA	1560	19	30	0	0	A_44_P133453	XM_236776	1175.06	307.379	2.540924e+003	2.541152e+002	2399.5	37	8.074964e+000	0	0	0	0	0	0	2398.59	1	1	45.4864	37.0286
DATA	1561	19	31	0	0	A_64_P027323	NM_001000088	1200.63	307.239	4.592488e+001	5.719098e+000	107.5	34	6.160245e+000	0	0	0	0	0	0	43.353	1	1	46.1809	35.3043
DATA	1562	19	32	0	0	A_44_P374568	NM_001107778	1225.8	307.508	2.018438e+002	2.047023e+001	253	40	7.430010e+000	0	0	0	0	0	0	190.507	1	1	45.4864	39.9714
DATA	1563	19	33	0	0	A_64_P040176	NM_001108498	1251.28	307.16	2.228498e+003	2.228759e+002	2076	41	8.508472e+000	0	0	0	0	0	0	2102.35	1	1	49.1849	40.5862
DATA	1564	19	34	0	0	A_64_P347204	ENSRNOT00000002350	1276.89	307.5	8.551682e+001	9.207509e+000	145.5	38	8.511189e+000	0	0	0	0	0	0	80.6243	1	1	56.9804	39.0286
DATA	1565	19	35	0	0	A_64_P142544	A_64_P142544	1302.31	307.426	1.357042e+001	3.675548e+000	74	39.5	7.336634e+000	0	0	0	0	0	0	12.7824	1	0	41.4593	40.1471
DATA	1566	19	36	0	0	A_64_P047367	NM_017050	1327.58	307.573	3.808142e+004	3.808144e+003	35777	41	1.013056e+001	0	0	0	0	0	0	35830.4	1	1	57.5363	41.4643
DATA	1567	19	37	0	0	A_64_P130858	NM_001003705	1353.11	307.5	7.110985e+001	7.892540e+000	132	38	7.327662e+000	0	0	0	0	0	0	66.815	1	1	56.9804	39.1935
DATA	1568	19	38	0	0	A_42_P647009	NM_053814	1378.5	307.648	1.528052e+003	1.528436e+002	1498	41	7.794229e+000	0	0	0	0	0	0	1433.51	1	1	57.5363	41
DATA	1569	19	39	0	0	A_42_P618538	NM_001030031	1403.52	307.563	5.136252e+002	5.147731e+001	543	38	9.778469e+000	0	0	0	0	0	0	480.987	1	1	48.2044	40.4615
DATA	1570	19	40	0	0	A_64_P048225	NM_001108643	1429.48	307.299	2.860991e+001	4.476587e+000	88	38.5	6.909372e+000	0	0	0	0	0	0	26.7359	1	1	46.5243	38.4643
DATA	1571	19	41	0	0	A_64_P044826	A_64_P044826	1454.46	307.527	9.562680e+001	1.016618e+001	151	39	7.313375e+000	0	0	0	0	0	0	89.168	1	1	49.1849	38.8214
DATA	1572	19	42	0	0	A_64_P046273	NM_001168559	1479.82	307.589	1.640796e+002	1.676860e+001	217	36	8.974805e+000	0	0	0	0	0	0	152.624	1	1	48.2044	38.0667
DATA	1573	19	43	0	0	A_43_P16232	NM_024395	1505.13	307.786	1.295161e+003	1.295625e+002	1289.5	42.5	8.361378e+000	0	0	0	0	0	0	1201.57	1	1	46.5243	40.1333
DATA	1574	19	44	0	0	A_44_P147356	XM_225859	1530.48	307.648	6.478465e+003	6.478558e+002	5872	41	7.304260e+000	0	0	0	0	0	0	5993.13	1	1	47.8731	38.931
DATA	1575	19	45	0	0	A_44_P979417	ENSRNOT00000068382	1556.5	308	2.363101e+001	4.213836e+000	85.5	40	9.101608e+000	0	0	0	0	0	0	21.7931	1	1	54.1152	39.8421
DATA	1576	19	46	0	0	A_44_P283784	NM_001107682	1581.06	307.531	3.744005e+002	3.760329e+001	414.5	36	8.710518e+000	0	0	0	0	0	0	344.185	1	1	44.0646	36.8387
DATA	1577	19	47	0	0	A_44_P112061	ENSRNOT00000046359	1606.86	307.768	3.232183e+002	3.251208e+001	353	40	5.722762e+000	0	0	0	0	0	0	296.108	1	1	46.1809	41
DATA	1578	19	48	0	0	A_42_P541025	NM_212546	1632.19	307.642	1.740633e+002	1.775962e+001	223	38	6.039592e+000	0	0	0	0	0	0	158.89	1	1	45.835	38.68
DATA	1579	19	49	0	0	A_44_P156521	NM_001025135	1657.71	307.754	8.249099e+002	8.256683e+001	815	42.5	8.240097e+000	0	0	0	0	0	0	750.169	1	1	45.1352	43.3125
DATA	1580	19	50	0	0	A_42_P562202	NM_001107959	1682.86	307.789	5.023917e+001	6.152662e+000	111	41	8.405355e+000	0	0	0	0	0	0	45.5104	1	1	47.2035	40.0833
DATA	1581	19	51	0	0	A_42_P522899	NM_021578	1708.13	308.1	4.644777e+001	5.855870e+000	104	36	7.990922e+000	0	0	0	0	0	0	41.9072	1	1	46.8651	37.375
DATA	1582	19	52	0	0	A_42_P581060	NM_001108722	1733.5	308	6.220378e+003	6.220481e+002	5534	36.5	7.310480e+000	0	0	0	0	0	0	5588.71	1	1	48.5334	37.0357
DATA	1583	19	53	0	1	ERCC-00043_129	ERCC-00043_129	1759.5	308	3.611485e+000	3.597100e+000	59	44	6.270493e+000	0	0	0	0	0	0	-5.08275	0	0	54.1152	43.3704
DATA	1584	19	54	0	0	A_64_P098577	A_64_P098577	1784.88	307.4	3.627811e+000	3.613361e+000	61.5	41.5	9.513096e+000	0	0	0	0	0	0	-3.59906	0	0	43.3362	40.7813
DATA	1585	19	55	0	0	A_64_P043164	ENSRNOT00000009696	1810.39	308.069	2.997889e+002	3.019783e+001	337.5	42	1.031532e+001	0	0	0	0	0	0	265.745	1	1	53.8203	43.1667
DATA	1586	19	56	0	0	A_42_P576446	NM_001107673	1835.25	308	4.048155e+003	4.048320e+002	3522	39.5	9.569304e+000	0	0	0	0	0	0	3572.13	1	1	49.1849	38.9063
DATA	1587	19	57	0	0	A_42_P801593	NM_001134744	1860.54	308.118	1.217022e+003	1.217573e+002	1095.5	39.5	8.501354e+000	0	0	0	0	0	0	1068.88	1	1	49.8279	40.1111
DATA	1588	19	58	0	0	A_42_P535743	NM_199393	1885.81	308	2.506093e+003	2.506363e+002	2167	36.5	8.329444e+000	0	0	0	0	0	0	2190.52	1	1	46.8651	38.25
DATA	1589	19	59	0	0	A_64_P051890	ENSRNOT00000056631	1911.58	308.427	2.563488e+001	4.500484e+000	87	40	1.174962e+001	0	0	0	0	0	0	22.2978	1	1	57.5363	42.3529
DATA	1590	19	60	0	0	A_64_P098379	NM_001013890	1937.42	308.427	3.732368e+000	3.734862e+000	67	41	8.888094e+000	0	0	0	0	0	0	3.11312	0	0	57.5363	40.8235
DATA	1591	19	61	0	0	A_64_P144513	XR_086096	1962.5	308.352	3.640962e+004	3.640964e+003	31590	34	9.958890e+000	0	0	0	0	0	0	31359.7	1	1	57.5363	37.4444
DATA	1592	19	62	0	0	A_44_P325337	NM_001030041	1988	308.455	8.480350e+001	9.274151e+000	136	35.5	9.370295e+000	0	0	0	0	0	0	72.6815	1	1	55.8519	36.0625
DATA	1593	19	63	0	0	A_44_P142029	NM_001002851	2012.91	307.672	2.261786e+003	2.262100e+002	1960	35	9.288739e+000	0	0	0	0	0	0	1928.97	1	1	45.1352	37.1143
DATA	1594	19	64	0	0	A_44_P292568	NM_001000207	2038.45	308.123	1.236268e+002	1.293091e+001	167.5	37	9.322767e+000	0	0	0	0	0	0	104.922	1	1	48.2044	39.2258
DATA	1595	19	65	0	0	A_42_P624092	XR_007263	2063.87	308.229	3.886225e+003	3.886412e+002	3175	43	8.534950e+000	0	0	0	1	0	0	3282.24	1	1	46.5243	41.0857
DATA	1596	19	66	0	0	A_42_P597322	NM_001103357	2089.06	308.389	2.866519e+002	2.891963e+001	301	34.5	6.565249e+000	0	0	0	0	0	0	240.953	1	1	48.2044	34.4412
DATA	1597	19	67	0	0	A_64_P034409	NM_001108146	2114.75	308.373	1.601038e+003	1.601499e+002	1423.5	42	1.098148e+001	0	0	0	0	0	0	1339.36	1	1	46.1809	40.5833
DATA	1598	19	68	0	0	A_64_P112797	NM_001001121	2140.07	308.282	4.080096e+002	4.098352e+001	408	39.5	9.326893e+000	0	0	0	0	0	0	339.741	1	1	47.2035	39.9063
DATA	1599	19	69	0	0	A_42_P761023	NM_001144870	2165.24	308.203	1.437850e+002	1.489319e+001	181	40	8.373369e+000	0	0	0	1	0	0	119.188	1	1	48.5334	39.5517
DATA	1600	19	70	0	0	A_42_P465408	NM_031647	2191.11	308.5	5.232125e+002	5.246632e+001	497	39	6.397463e+000	0	0	0	1	0	0	431.782	1	1	56.9804	39.1667
DATA	1601	19	71	0	0	A_64_P115761	NM_001109379	2216.11	308.07	1.889355e+001	4.347434e+000	80	38	6.784391e+000	0	0	0	0	0	0	15.5259	1	0	46.8651	39.1935
DATA	1602	19	72	0	0	A_64_P086487	A_64_P086487	2241.68	307.967	1.546103e+001	4.224706e+000	77	35	8.741663e+000	0	0	0	0	0	0	12.6528	1	0	43.7019	36
DATA	1603	19	73	0	0	A_42_P774028	NM_001017447	2267	308.191	1.593419e+003	1.593908e+002	1325	35	6.285908e+000	0	0	0	0	0	0	1298.98	1	1	46.8651	36.7333
DATA	1604	19	74	0	0	A_44_P233080	ENSRNOT00000026303	2292.31	308.338	4.705467e+003	4.705634e+002	3844	40.5	8.951257e+000	0	0	0	0	0	0	3821.98	1	1	48.5334	40.4375
DATA	1605	19	75	0	0	A_64_P078002	ENSRNOT00000056206	2318.11	308.5	7.390478e+000	4.043218e+000	70	40	6.566147e+000	0	0	0	0	0	0	5.98198	1	0	65	39.9429
DATA	1606	19	76	0	0	A_64_P047888	A_64_P047888	2343.09	308.891	4.003346e+000	3.987408e+000	62	40	8.789234e+000	0	0	0	0	0	0	0.0640188	0	0	45.835	40.675
DATA	1607	19	77	0	0	A_44_P236001	NM_001000623	2368.81	308.377	8.255415e+001	9.173192e+000	132	42	9.036842e+000	0	0	0	0	0	0	66.414	1	1	49.8279	42.7419
DATA	1608	19	78	0	0	A_42_P819040	TC636720	2394.33	308.5	2.069956e+001	4.512624e+000	79	44	1.107446e+001	0	0	0	0	0	0	16.6093	1	1	57.5363	44.6571
DATA	1609	19	79	0	0	A_44_P168184	NM_001166675	2419.5	308.742	2.174231e+003	2.174603e+002	1834.5	47	8.864724e+000	0	0	0	0	0	0	1740.72	1	1	46.5243	46
DATA	1610	19	80	0	0	A_64_P094925	NM_001024748	2445	308.545	1.919776e+002	1.961551e+001	212.5	45.5	8.476243e+000	0	0	0	0	0	0	153.399	1	1	55.8519	45.8235
DATA	1611	19	81	0	0	A_44_P332483	NM_173338	2470.42	308.573	4.049026e+000	4.032899e+000	60.5	49.5	6.434653e+000	0	0	0	0	0	0	-1.74935	0	0	65	48.5
DATA	1612	19	82	0	0	A_42_P530071	NM_001107153	2495.5	308.711	5.406247e+003	5.406398e+002	4167.5	42	1.203461e+001	0	0	0	0	0	0	4308.41	1	1	49.1849	43.7037
DATA	1613	19	83	66	1	DarkCorner	DarkCorner	2521.42	308.573	4.056541e+000	4.040384e+000	59	40	8.189204e+000	0	0	0	0	0	0	-4.14959	0	0	57.5363	40.7838
DATA	1614	19	84	66	1	DarkCorner	DarkCorner	2547	308.947	4.057330e+000	4.041169e+000	58	41	8.528615e+000	0	0	0	0	0	0	-4.85526	0	0	43.3362	41.9574
DATA	1615	19	85	66	1	DarkCorner	DarkCorner	2572	308.545	4.056614e+000	4.041147e+000	63	41	1.045011e+001	0	0	0	0	0	0	0.594613	0	0	55.8519	42.4634
DATA	1616	20	1	66	1	DarkCorner	DarkCorner	451.5	314.162	3.695830e+000	3.681109e+000	58.5	41	1.065907e+001	0	0	0	0	0	0	-2.15155	0	0	47.2035	43.8372
DATA	1617	20	2	66	1	DarkCorner	DarkCorner	476.62	314.19	3.680791e+000	3.666130e+000	62	39	7.539596e+000	0	0	0	0	0	0	-0.517408	0	0	50.4627	37.975
DATA	1618	20	3	66	1	DarkCorner	DarkCorner	502.757	314.343	3.665098e+000	3.650499e+000	56	36	9.858756e+000	0	0	0	0	0	0	-3.32019	0	0	47.5395	36.8485
DATA	1619	20	4	0	0	A_42_P787775	NM_001127566	527.543	314.386	3.482974e+002	3.501900e+001	374	37	9.329605e+000	0	0	0	0	0	0	308.224	1	1	47.5395	36.8077
DATA	1620	20	5	0	0	A_42_P607770	NM_001134616	552.849	314.164	4.600826e+003	4.600968e+002	3944.5	40	8.726368e+000	0	0	0	0	0	0	4087.95	1	1	47.5395	37.3953
DATA	1621	20	6	0	0	A_42_P484738	NM_022266	578.5	314.5	7.355593e+002	7.364427e+001	719	38.5	8.053688e+000	0	0	0	0	0	0	656.281	1	1	57.5363	39.0938
DATA	1622	20	7	0	0	A_64_P075273	NM_031743	604	314.455	2.382690e+002	2.409610e+001	282.5	38	7.075486e+000	0	0	0	0	0	0	213.443	1	1	55.8519	37
DATA	1623	20	8	0	0	A_42_P674050	NM_001107225	628.959	314.452	2.737674e+003	2.737908e+002	2438	39	8.810468e+000	0	0	0	0	0	0	2461.92	1	1	48.5334	40.0714
DATA	1624	20	9	1028	1	(+)E1A_r60_a107	E1A_r60_a107	654.667	314.5	8.088096e+000	3.654555e+000	68	37	7.130214e+000	0	0	0	0	0	0	7.30193	1	0	57.5363	37.6071
DATA	1625	20	10	0	0	A_64_P144253	NM_201350	680.333	314.5	1.931419e+001	4.041747e+000	78.5	39	7.532382e+000	0	0	0	0	0	0	17.5033	1	1	57.5363	38.5667
DATA	1626	20	11	0	0	A_44_P791729	NM_181377	705.015	314.565	5.676638e+003	5.676748e+002	5067	38	9.682140e+000	0	0	0	0	0	0	5162.78	1	1	47.5395	39.6207
DATA	1627	20	12	0	0	A_42_P550624	NM_001109319	730.627	314.64	1.057512e+003	1.058099e+002	985.5	37	7.996288e+000	0	0	0	0	0	0	965.241	1	1	48.8603	36.5128
DATA	1628	20	13	0	0	A_43_P11580	NM_012833	756.288	314.26	9.420065e+001	1.005383e+001	148.5	39	8.266359e+000	0	0	0	0	0	0	86.2746	1	1	48.2044	40.225
DATA	1629	20	14	0	0	A_44_P417055	XM_223442	781.373	314.149	5.965885e+002	5.976153e+001	601	38.5	1.070449e+001	0	0	0	0	0	0	548.16	1	1	46.1809	40.1154
DATA	1630	20	15	0	0	A_64_P142867	A_64_P142867	807.059	314.618	6.298562e+003	6.298658e+002	5836	37	8.267959e+000	0	0	0	0	0	0	5806.03	1	1	46.1809	37.3226
DATA	1631	20	16	0	0	A_64_P013002	XM_001072551	832.647	313.985	1.660593e+001	3.856140e+000	77	35.5	9.545255e+000	0	0	0	0	0	0	15.3522	1	0	46.1809	37.2813
DATA	1632	20	17	0	0	A_42_P457692	NM_001008363	858	314.545	2.669230e+003	2.669455e+002	2514.5	38	1.051440e+001	0	0	0	0	0	0	2474.84	1	1	55.8519	38.9459
DATA	1633	20	18	0	0	A_42_P788480	NM_019194	882.824	314.878	6.383437e+003	6.383530e+002	5766	38.5	6.002450e+000	0	0	0	0	0	0	5934.12	1	1	47.8731	39.0294
DATA	1634	20	19	0	0	A_42_P518462	NM_001007020	908.188	315.043	4.263812e+003	4.263952e+002	4007	40	7.280110e+000	0	0	0	0	0	0	3973.56	1	1	46.8651	40.4
DATA	1635	20	20	0	0	A_64_P007578	NM_001000851	933.612	315.047	3.458436e+000	3.454795e+000	64	39	6.844180e+000	0	0	0	0	0	0	2.46984	0	0	50.4627	39.303
DATA	1636	20	21	0	0	A_64_P139350	NM_001191727	959.194	314.444	5.345684e+001	6.355614e+000	113	38	6.640425e+000	0	0	0	0	0	0	50.0335	1	1	47.8731	38.9524
DATA	1637	20	22	0	0	A_64_P100442	ENSRNOT00000067861	984.912	314.614	1.776923e+002	1.809744e+001	226.5	38	7.482416e+000	0	0	0	0	0	0	166.634	1	1	57.259	37.8857
DATA	1638	20	23	1028	1	(+)E1A_r60_a135	E1A_r60_a135	1010.46	314.468	3.438986e+000	3.433921e+000	65	41.5	1.045824e+001	0	0	0	0	0	0	2.28582	0	0	50.4627	42.2368
DATA	1639	20	24	0	0	A_44_P459760	NM_001108187	1035.58	314.573	2.776838e+001	4.405573e+000	89	38.5	9.447701e+000	0	0	0	0	0	0	26.1223	1	1	57.5363	40.2917
DATA	1640	20	25	0	0	A_64_P115536	NM_212545	1061.09	314.614	3.429601e+000	3.425246e+000	64	36.5	1.075165e+001	0	0	0	0	0	0	2.37652	0	0	57.259	40.0882
DATA	1641	20	26	0	0	A_44_P538406	NM_013102	1086.08	314.89	1.856660e+004	1.856663e+003	17096	47.5	1.694795e+001	0	0	0	0	0	0	17506.5	1	1	46.8651	50.8438
DATA	1642	20	27	0	0	A_64_P120871	NM_198743	1111.38	314.816	5.865485e+002	5.875387e+001	595	46	1.491878e+001	0	0	0	0	0	0	553.505	1	1	48.8603	46.8485
DATA	1643	20	28	0	0	A_44_P173048	NM_001009255	1136.86	314.803	7.336959e+002	7.344868e+001	741	46.5	9.801564e+000	0	0	0	0	0	0	692.775	1	1	46.8651	45.375
DATA	1644	20	29	0	0	A_64_P058060	NM_001037541	1162.39	314.829	7.729852e+000	3.492906e+000	69	38.5	8.409050e+000	0	0	0	0	0	0	7.30144	1	0	49.8279	39.0455
DATA	1645	20	30	0	0	A_64_P145982	NM_001109366	1188.29	314.879	3.084439e+001	4.594926e+000	92	39	7.500379e+000	0	0	0	0	0	0	29.139	1	1	45.835	37.5455
DATA	1646	20	31	0	0	A_42_P514244	NM_012791	1213.36	314.836	1.541601e+002	1.578782e+001	202	37	6.930978e+000	0	0	0	0	0	0	145.622	1	1	48.2044	37.0385
DATA	1648	20	33	0	0	A_64_P159155	XM_001071429	1264.13	315	1.420505e+001	3.693214e+000	76	41	7.937612e+000	0	0	0	0	0	0	13.4067	1	0	46.8651	40.5455
DATA	1649	20	34	0	0	A_64_P030272	ENSRNOT00000041731	1289.93	314.814	1.605118e+002	1.640980e+001	213.5	37	8.266662e+000	0	0	0	0	0	0	151.367	1	1	46.8651	37.7188
DATA	1650	20	35	0	0	A_42_P733076	NM_001033867	1315	315	2.102656e+002	2.130212e+001	264	37	6.171907e+000	0	0	0	0	0	0	198.09	1	1	54.9904	36.7143
DATA	1651	20	36	0	0	A_44_P349475	NM_031333	1340.08	315.099	8.431598e+002	8.438529e+001	828	38	8.302323e+000	0	0	0	0	0	0	793.369	1	1	46.8651	40
DATA	1652	20	37	0	0	A_64_P009848	NM_001034135	1365.59	314.851	2.527200e+003	2.527432e+002	2427	38	7.221762e+000	0	0	0	0	0	0	2374.4	1	1	48.5334	38
DATA	1653	20	38	0	0	A_64_P116685	NM_001166763	1391.07	314.8	4.133654e+003	4.133796e+002	3978.5	41	8.402467e+000	0	0	0	0	0	0	3877.11	1	1	46.8651	42.9167
DATA	1654	20	39	0	0	A_64_P072659	NM_001109296	1416.49	314.697	9.733898e+002	9.739965e+001	979	38	9.247305e+000	0	0	0	0	0	0	911.221	1	1	48.5334	39.9333
DATA	1655	20	40	0	0	A_42_P808442	NM_001108759	1441.87	314.629	5.112978e+002	5.124567e+001	535	40	6.462002e+000	0	0	0	1	0	0	477.619	1	1	46.5243	39.0333
DATA	1656	20	41	0	0	A_64_P140836	NM_001017486	1466.99	314.843	9.676243e+001	1.027366e+001	155.5	41	1.092372e+001	0	0	0	0	0	0	90.1813	1	1	46.8651	41.7143
DATA	1657	20	42	0	0	A_64_P034384	NM_019227	1492.41	314.652	1.826220e+002	1.858731e+001	234.5	36	8.601114e+000	0	0	0	0	0	0	169.764	1	1	46.8651	37.3333
DATA	1658	20	43	0	0	A_42_P730411	NM_001012181	1517.83	314.853	6.093361e+002	6.103237e+001	603	42	7.166529e+000	0	0	0	0	0	0	564.884	1	1	47.8731	41.6774
DATA	1659	20	44	0	0	A_44_P396450	ENSRNOT00000018433	1543.18	314.723	1.144798e+002	1.196552e+001	172	35.5	8.277174e+000	0	0	0	0	0	0	105.815	1	1	45.4864	37.0238
DATA	1660	20	45	0	0	A_44_P268610	NM_001109134	1568.8	315.025	2.923055e+003	2.923263e+002	2710.5	39	8.203087e+000	0	0	0	0	0	0	2693.32	1	1	49.8279	39.1724
DATA	1661	20	46	0	0	A_64_P059105	NM_001134544	1594.19	314.662	6.931039e+001	7.766302e+000	129	37.5	8.048242e+000	0	0	0	0	0	0	63.6484	1	1	46.5243	37
DATA	1662	20	47	0	0	A_42_P524851	NM_001130061	1619.43	314.657	6.794829e+002	6.803920e+001	679	39	6.289636e+000	0	0	0	0	0	0	621.804	1	1	46.5243	39.3214
DATA	1663	20	48	0	0	A_64_P141675	FM127585	1644.62	314.718	1.321303e+003	1.321774e+002	1248	39.5	6.185355e+000	0	0	0	0	0	0	1204.75	1	1	47.5395	40.5
DATA	1664	20	49	0	0	A_64_P002979	ENSRNOT00000034762	1669.94	315.318	3.556270e+000	3.546991e+000	66	42	9.757611e+000	0	0	0	0	0	0	1.69063	0	0	45.835	42.8049
DATA	1665	20	50	0	0	A_44_P175822	NM_001109511	1695.62	315.237	1.295184e+002	1.343125e+001	180	42	9.135944e+000	0	0	0	0	0	0	117.175	1	1	49.1849	40.9189
DATA	1666	20	51	0	0	A_44_P1008751	NM_001137645	1721.42	315.427	9.846462e+001	1.047412e+001	154	40	9.776442e+000	0	0	0	0	0	0	88.7094	1	1	57.5363	39.6897
DATA	1667	20	52	0	0	A_44_P255350	NM_001007674	1746.18	315.122	2.084506e+002	2.115132e+001	247	40	7.892598e+000	0	0	0	0	0	0	187.014	1	1	47.8731	42.3103
DATA	1668	20	53	0	0	A_64_P017328	NM_012758	1772.11	315.5	9.655098e+002	9.661816e+001	931	42	6.684042e+000	0	0	0	0	0	0	862.38	1	1	56.9804	41.9688
DATA	1669	20	54	0	0	A_64_P132571	NM_001107703	1797.3	315.029	4.038116e+003	4.038278e+002	3655	38.5	8.462493e+000	0	0	0	0	0	0	3590.56	1	1	46.1809	38.2
DATA	1670	20	55	0	0	A_44_P107535	NM_001170336	1822.63	315.342	3.006696e+002	3.028590e+001	325.5	41	1.028383e+001	0	0	0	0	0	0	266.132	1	1	48.2044	40.4286
DATA	1671	20	56	0	0	A_44_P353618	NM_053587	1848.13	315.203	4.912951e+001	6.121772e+000	107	40	9.527418e+000	0	0	0	0	0	0	43.2814	1	1	45.835	39.3421
DATA	1672	20	57	0	0	A_44_P213336	A_44_P213336	1873.44	315.534	2.825769e+002	2.849495e+001	317	39.5	9.724429e+000	0	0	0	0	0	0	247.771	1	1	49.1849	40.375
DATA	1673	20	58	0	0	A_42_P507072	FQ213070	1898.63	315.36	2.167723e+003	2.168037e+002	1968	38	8.561565e+000	0	0	0	0	0	0	1891.62	1	1	48.8603	37.1304
DATA	1674	20	59	0	0	A_44_P428886	NM_001099516	1924.21	315.397	1.327131e+002	1.377884e+001	180.5	41	9.917710e+000	0	0	0	0	0	0	115.244	1	1	50.1463	40.8049
DATA	1675	20	60	0	0	A_64_P086784	NM_001108657	1949.44	315.532	2.852907e+003	2.853150e+002	2397	38	8.967177e+000	0	0	0	0	0	0	2465.38	1	1	49.8279	38.7778
DATA	1676	20	61	0	0	A_42_P654682	NM_012724	1974.95	315.367	6.831020e+000	3.803610e+000	72	34	7.817500e+000	0	0	0	1	0	0	5.87394	1	0	49.8279	34.4483
DATA	1677	20	62	0	0	A_44_P443008	NM_001013068	2000.22	315.176	3.315900e+002	3.337152e+001	347.5	38	9.289721e+000	0	0	0	0	0	0	283.733	1	1	48.2044	38.9677
DATA	1678	20	63	0	0	A_64_P027229	A_64_P027229	2025.88	315.28	1.139533e+003	1.140160e+002	1043	40	1.032058e+001	0	0	0	0	0	0	970.258	1	1	50.7771	38.6667
DATA	1679	20	64	0	0	A_64_P134277	ENSRNOT00000029167	2051.47	315.317	5.324299e+001	6.539789e+000	110	43	7.624662e+000	0	0	0	0	0	0	45.1118	1	1	42.9674	42.2759
DATA	1680	20	65	0	0	A_64_P165548	XM_001055860	2076.58	315.573	5.858951e+001	6.991822e+000	112.5	38	7.337212e+000	0	0	0	0	0	0	49.4067	1	1	57.5363	37.8125
DATA	1681	20	66	0	0	A_64_P014737	NM_001000069	2102.42	315.573	3.849407e+000	3.835857e+000	65	33	8.226111e+000	0	0	0	0	0	0	0.981199	0	0	57.5363	35.5143
DATA	1682	20	67	0	0	A_42_P627330	NM_001106628	2127.31	315.611	4.722202e+002	4.737884e+001	449.5	43	1.046293e+001	0	0	0	0	0	0	394.469	1	1	48.2044	41.5172
DATA	1683	20	68	0	0	A_64_P039452	NM_001109063	2153.12	315.783	2.378690e+002	2.409959e+001	259	41	9.345993e+000	0	0	0	0	0	0	197.784	1	1	46.5243	40.4706
DATA	1684	20	69	0	0	A_44_P516885	ENSRNOT00000005601	2178.42	315.573	2.642842e+004	2.642845e+003	21699.5	40	8.845903e+000	0	0	0	0	0	0	21876.8	1	1	57.5363	39.6
DATA	1685	20	70	0	0	A_44_P839176	NM_001107114	2203.38	315.425	2.244666e+003	2.245005e+002	1851.5	39	7.210707e+000	0	0	0	0	0	0	1850.16	1	1	48.5334	39.0741
DATA	1686	20	71	0	0	A_64_P083342	AABR03026150	2229.32	315.529	2.419125e+001	4.606504e+000	82	37	6.641970e+000	0	0	0	0	0	0	19.8552	1	1	46.5243	38.5172
DATA	1687	20	72	0	0	A_42_P618185	NM_001108486	2254.26	315.429	1.846669e+003	1.847088e+002	1585	34.5	6.946874e+000	0	0	0	1	0	0	1509.73	1	1	49.5074	35.4583
DATA	1688	20	73	0	0	A_42_P619957	NM_053830	2279.91	315.935	1.802996e+002	1.845766e+001	209	37	9.624287e+000	0	0	0	0	0	0	146.85	1	1	54.4085	39.2424
DATA	1689	20	74	0	0	A_44_P375042	NM_001014243	2305	315.797	1.761790e+002	1.805842e+001	204	40	8.484673e+000	0	0	0	0	0	0	142.988	1	1	46.8651	39.6944
DATA	1690	20	75	0	0	A_44_P438053	NM_001004201	2330.45	315.806	8.470257e+001	9.357686e+000	132.5	39	9.535917e+000	0	0	0	0	0	0	68.5172	1	1	46.5243	39.0606
DATA	1691	20	76	0	0	A_43_P19181	ENSRNOT00000018440	2356.83	316.31	1.237961e+002	1.300669e+001	161.5	39	8.269681e+000	0	0	0	0	0	0	99.8315	1	1	50.7771	40.1316
DATA	1692	20	77	0	0	A_42_P664259	NM_024396	2381.5	316	2.949736e+004	2.949739e+003	23284	45	9.908506e+000	0	0	0	0	0	0	23722.9	1	1	54.1152	45.3871
DATA	1693	20	78	0	0	A_44_P588645	FQ230244	2406.97	315.727	7.837819e+001	8.804351e+000	123	46	6.672581e+000	0	0	0	0	0	0	62.8786	1	1	45.835	45.24
DATA	1694	20	79	0	0	A_64_P030844	XM_001065657	2431.88	316.234	2.290457e+001	4.625515e+000	82	44.5	8.249145e+000	0	0	0	0	0	0	18.3386	1	1	45.835	44.125
DATA	1695	20	80	0	0	A_64_P054823	A_64_P054823	2457.63	316	9.921170e+003	9.921252e+002	7863	47.5	6.002645e+000	0	0	0	0	0	0	7929.23	1	1	50.4627	47.4286
DATA	1696	20	81	0	0	A_42_P516860	XM_001059330	2483	316	6.140220e+001	7.345255e+000	114	45	9.771046e+000	0	0	0	0	0	0	49.0085	1	1	54.9904	45.84
DATA	1697	20	82	0	0	A_64_P085772	NM_001191606	2508.34	315.958	8.608030e+001	9.506773e+000	131	42	1.200305e+001	0	0	0	0	0	0	68.6419	1	1	46.8651	43.8387
DATA	1698	20	83	66	1	DarkCorner	DarkCorner	2533.05	316.323	4.052751e+000	4.036608e+000	54.5	39	8.706258e+000	0	0	0	0	0	0	-7.38238	0	0	44.4243	40.1282
DATA	1699	20	84	66	1	DarkCorner	DarkCorner	2559.5	316	4.052980e+000	4.036837e+000	60	40	8.260262e+000	0	0	0	0	0	0	-1.70117	0	0	65	41.0571
DATA	1700	20	85	66	1	DarkCorner	DarkCorner	2584.49	315.723	4.051169e+000	4.035033e+000	58	39	8.194023e+000	0	0	0	0	0	0	-4.86151	0	0	50.4627	39.7989
DATA	1701	21	1	66	1	DarkCorner	DarkCorner	438.893	321.5	7.370131e+000	3.756197e+000	68	45	1.049668e+001	0	0	0	0	0	0	6.43832	1	0	56.9804	45.373
DATA	1702	21	2	66	1	DarkCorner	DarkCorner	463.929	321.94	3.682821e+000	3.668152e+000	56	39	7.730459e+000	0	0	0	0	0	0	-4.02098	0	0	52.0157	38.52
DATA	1703	21	3	66	1	DarkCorner	DarkCorner	489.25	321.438	3.668235e+000	3.653624e+000	56	38	8.726622e+000	0	0	0	0	0	0	-4.32383	0	0	45.1352	37.4186
DATA	1704	21	4	0	0	A_44_P277669	NM_001163736	514.938	322.031	4.541784e+002	4.556332e+001	465	40	1.034241e+001	0	0	0	0	0	0	401.663	1	1	46.8651	39
DATA	1705	21	5	0	0	A_42_P788480	NM_019194	540.253	321.413	6.371742e+003	6.371845e+002	5441	37	6.928203e+000	0	0	0	0	0	0	5657.24	1	1	48.8603	36.6667
DATA	1706	21	6	0	0	A_42_P558354	NM_001007686	565.946	321.523	1.728510e+003	1.728886e+002	1509	38	9.463175e+000	0	0	0	0	0	0	1540.99	1	1	55.8519	38.0952
DATA	1707	21	7	0	0	A_44_P714409	NM_001047907	590.986	321.616	2.207467e+003	2.207760e+002	1992	37.5	6.886936e+000	0	0	0	0	0	0	1975.78	1	1	48.8603	37.4667
DATA	1708	21	8	0	0	A_42_P604331	NM_001108533	616.582	321.573	5.679361e+004	5.679362e+003	52074	37	6.641520e+000	0	0	0	0	0	0	51034.3	1	1	57.5363	36.9643
DATA	1709	21	9	0	0	A_64_P139472	NM_173119	641.877	321.397	2.175699e+003	2.175991e+002	1971	38.5	7.914891e+000	0	0	0	0	0	0	1962.55	1	1	48.5334	39.8571
DATA	1710	21	10	0	0	A_42_P711589	NM_022948	667.181	321.639	2.612730e+003	2.612972e+002	2363	37	5.202709e+000	0	0	0	0	0	0	2365.75	1	1	47.8731	37.5455
DATA	1711	21	11	0	0	A_42_P813567	NM_031841	692.633	321.596	7.142226e+004	7.142227e+003	65217.5	40	8.648403e+000	0	0	0	0	0	0	64909.4	1	1	57.8122	40.8889
DATA	1712	21	12	0	0	A_42_P647505	TC640289	717.923	322.077	1.851353e+003	1.851689e+002	1686	35.5	7.699365e+000	0	0	0	0	0	0	1688.65	1	1	46.1809	35.7368
DATA	1713	21	13	0	0	A_64_P094313	NM_032073	743.609	321.362	5.136549e+002	5.148566e+001	538	38	7.877289e+000	0	0	0	0	0	0	470.106	1	1	47.5395	37.2619
DATA	1714	21	14	0	0	A_42_P577421	NM_001106819	768.773	321.788	1.125606e+002	1.178879e+001	162	38	9.421321e+000	0	0	0	0	0	0	103.364	1	1	45.835	38.1935
DATA	1715	21	15	0	0	A_42_P477311	NM_001013170	793.94	321.687	6.029528e+003	6.029629e+002	5630	39	1.165556e+001	0	0	0	0	0	0	5554.33	1	1	45.835	40.8286
DATA	1716	21	16	0	0	A_42_P630249	NM_031824	819.3	321.9	1.768076e+003	1.768419e+002	1644.5	37	1.096445e+001	0	0	0	1	0	0	1633.73	1	1	47.2035	37.8276
DATA	1717	21	17	0	0	A_42_P618256	NM_001024759	844.97	321.866	3.687371e+002	3.703681e+001	411	38.5	1.047248e+001	0	0	0	0	0	0	341.71	1	1	46.8651	37.9474
DATA	1718	21	18	0	0	A_64_P101584	A_64_P101584	870.5	322	3.123710e+002	3.142841e+001	354	38	8.021236e+000	0	0	0	0	0	0	290.271	1	1	54.1152	38.9333
DATA	1719	21	19	0	0	A_64_P045461	NM_001106750	896	322	9.335086e+001	9.953478e+000	146	39.5	6.544516e+000	0	0	0	0	0	0	86.9675	1	1	54.9904	39.6429
DATA	1720	21	20	0	0	A_64_P056485	ENSRNOT00000033663	920.838	322.103	9.566090e+002	9.572294e+001	951.5	40	6.089316e+000	0	0	0	0	0	0	893.262	1	1	46.5243	41.8148
DATA	1721	21	21	0	0	A_64_P013077	A_64_P013077	946.284	321.97	1.056369e+002	1.110915e+001	163	38	6.161178e+000	0	0	0	0	0	0	98.8546	1	1	45.835	38.963
DATA	1722	21	22	0	0	A_44_P348952	NM_001000368	972.5	322	3.444986e+000	3.443797e+000	67	36	6.784371e+000	0	0	0	0	0	0	2.75246	0	0	54.1152	36.8605
DATA	1723	21	23	0	0	A_64_P147609	NM_001106295	997.3	322.1	2.181852e+003	2.182120e+002	2159	38	7.639362e+000	0	0	0	0	0	0	2049.49	1	1	47.2035	38.7879
DATA	1724	21	24	0	0	A_44_P193928	NM_183328	1023	322	4.929096e+002	4.940946e+001	510	42	1.170670e+001	0	0	0	0	0	0	463.735	1	1	65	42.2414
DATA	1725	21	25	0	0	A_44_P441947	XM_001079870	1047.93	321.8	9.315226e+002	9.321486e+001	947	40	1.051453e+001	0	0	0	0	0	0	877.532	1	1	46.8651	41.6563
DATA	1726	21	26	0	0	A_42_P666259	NM_001009661	1073.31	322	7.134254e+003	7.134335e+002	6661	39	1.274350e+001	0	0	0	0	0	0	6728.55	1	1	47.2035	42.7857
DATA	1727	21	27	0	0	A_64_P082486	A_64_P082486	1098.85	321.909	6.748022e+002	6.756624e+001	697	49	1.236199e+001	0	0	0	0	0	0	637.011	1	1	46.1809	51.3214
DATA	1728	21	28	0	0	A_64_P091940	NM_033237	1124.69	321.65	1.231790e+002	1.278014e+001	178	46	1.304436e+001	0	0	0	0	0	0	116.36	1	1	49.5074	46.0303
DATA	1729	21	29	0	0	A_64_P144899	NM_001107736	1149.44	321.712	3.076771e+002	3.095549e+001	354.5	45.5	9.610909e+000	0	0	0	0	0	0	290.778	1	1	46.1809	44.75
DATA	1730	21	30	0	0	A_44_P410062	XM_224553	1175	321.774	2.596253e+002	2.618468e+001	311	38	7.492629e+000	0	0	0	0	0	0	245.428	1	1	45.4864	36.9143
DATA	1731	21	31	0	0	A_42_P489764	NM_001004099	1200.39	321.871	1.227054e+003	1.227526e+002	1217	38	7.910541e+000	0	0	0	0	0	0	1159.98	1	1	47.2035	36.92
DATA	1732	21	32	0	0	A_42_P640277	NM_001003401	1226.42	322.427	2.396751e+004	2.396753e+003	22441	40	7.490947e+000	0	0	0	0	0	0	22653.6	1	1	57.5363	39.0571
DATA	1733	21	33	0	0	A_44_P212850	NM_019305	1251.56	321.971	3.417216e+001	4.824601e+000	97	43	8.728527e+000	0	0	0	0	0	0	32.2831	1	1	47.8731	41.5172
DATA	1734	21	34	0	0	A_64_P125506	NM_021677	1276.77	322.076	2.198370e+002	2.224630e+001	271.5	39.5	6.670765e+000	0	0	0	0	0	0	207.547	1	1	45.835	39.5294
DATA	1735	21	35	0	0	A_42_P802358	NM_001024341	1302.11	322.352	7.537275e+003	7.537352e+002	7130	37	6.561101e+000	0	0	0	0	0	0	7109.65	1	1	47.8731	36.2973
DATA	1736	21	36	0	0	A_44_P552852	XM_346367	1327.81	321.931	9.032916e+000	3.532533e+000	73	38	5.316014e+000	0	0	0	0	0	0	8.51032	1	0	46.8651	38.48
DATA	1738	21	38	0	0	A_64_P141187	NM_001108899	1378.5	322.5	1.647369e+001	3.800561e+000	81	41	8.612428e+000	0	0	0	0	0	0	15.4758	1	0	57.5363	42.087
DATA	1739	21	39	0	0	A_44_P274823	NM_001105831	1403.39	321.871	1.527897e+003	1.528282e+002	1472	39	7.729892e+000	0	0	0	0	0	0	1432.73	1	1	47.2035	40.4138
DATA	1740	21	40	0	0	A_42_P804913	ENSRNOT00000022886	1429.11	322.074	4.213051e+001	5.437933e+000	103	40.5	9.122597e+000	0	0	0	0	0	0	39.4261	1	1	41.4593	42.0625
DATA	1741	21	41	0	0	A_64_P113970	NM_212501	1454.58	322.427	1.715414e+003	1.715760e+002	1624.5	41	7.717429e+000	0	0	0	0	0	0	1601.75	1	1	57.5363	40.6061
DATA	1742	21	42	1028	1	(+)E1A_r60_3	E1A_r60_3	1480.11	322.5	2.398865e+001	4.205562e+000	85	36	1.061767e+001	0	0	0	0	0	0	22.3443	1	1	56.9804	38.8788
DATA	1743	21	43	0	0	A_42_P661992	TC596141	1505.5	322.5	1.461017e+002	1.501509e+001	199	37	8.099181e+000	0	0	0	0	0	0	135.726	1	1	57.5363	37.6053
DATA	1744	21	44	0	0	A_42_P577431	NM_001109422	1530.67	322.5	3.715489e+001	5.086125e+000	96.5	37	9.578426e+000	0	0	0	0	0	0	34.4187	1	1	57.5363	37.2903
DATA	1745	21	45	0	0	A_44_P524785	NM_001000184	1556.33	322.5	3.497950e+000	3.484017e+000	62	34	7.546824e+000	0	0	0	0	0	0	-0.688929	0	0	57.5363	36.7273
DATA	1746	21	46	0	0	A_64_P027634	NM_001000223	1581.53	322.169	3.448151e+001	4.909896e+000	94	38	7.800370e+000	0	0	0	0	0	0	31.7408	1	1	42.9674	36.8438
DATA	1747	21	47	0	0	A_42_P492976	NM_001126099	1606.63	322.37	2.933810e+002	2.954697e+001	322.5	39.5	8.401625e+000	0	0	0	0	0	0	269.157	1	1	48.2044	39.0714
DATA	1748	21	48	0	0	A_64_P157479	AABR03127998	1632.06	322.314	3.934489e+003	3.934646e+002	3621	39	5.294002e+000	0	0	0	0	0	0	3596.67	1	1	46.8651	39.7857
DATA	1749	21	49	0	0	A_44_P391706	NM_001007796	1657.62	322.203	1.239723e+002	1.289085e+001	176	41	8.323024e+000	0	0	0	0	0	0	112.9	1	1	49.1849	40.9091
DATA	1750	21	50	0	0	A_44_P184685	NM_001007735	1683.24	322.792	7.638720e+001	8.421997e+000	132.5	42	9.200212e+000	0	0	0	0	0	0	69.2949	1	1	47.8731	42.6098
DATA	1751	21	51	0	0	A_44_P475275	NM_001000893	1708.71	322.639	4.607799e+001	5.823656e+000	106.5	39.5	9.676610e+000	0	0	0	0	0	0	41.6294	1	1	48.2044	38.5333
DATA	1752	21	52	0	0	A_44_P270056	NM_001007800	1733.62	322.887	1.868435e+002	1.902346e+001	233	41	8.837798e+000	0	0	0	0	0	0	168.116	1	1	47.8731	41.24
DATA	1753	21	53	0	0	A_64_P059351	NM_001145175	1759.42	322.573	1.009429e+002	1.071427e+001	154	40	5.681618e+000	0	0	0	0	0	0	90.425	1	1	57.5363	40.931
DATA	1754	21	54	0	0	A_42_P573441	NM_001105742	1784.47	322.685	4.978723e+003	4.978854e+002	4422	41.5	1.024504e+001	0	0	0	0	0	0	4440.54	1	1	48.5334	41.7333
DATA	1755	21	55	0	0	A_42_P485589	NM_017246	1810.07	322.647	1.204262e+002	1.257610e+001	174	42	9.264628e+000	0	0	0	0	0	0	106.917	1	1	46.1809	39.6
DATA	1756	21	56	0	0	A_44_P149540	XM_223051	1835.18	322.507	9.998489e+003	9.998555e+002	8536	41.5	9.102514e+000	0	0	0	0	0	0	8836.22	1	1	47.8731	41.625
DATA	1757	21	57	0	0	A_44_P323236	NM_001000513	1860.91	322.614	1.882683e+001	4.114155e+000	81	42.5	1.108037e+001	0	0	0	0	0	0	16.5593	1	1	57.259	42.7941
DATA	1759	21	59	0	0	A_64_P100447	NM_001173469	1911.58	322.573	3.708155e+000	3.693935e+000	64	39	9.494188e+000	0	0	0	0	0	0	0.555014	0	0	57.5363	39.7037
DATA	1760	21	60	0	0	A_64_P150008	A_64_P150008	1937.37	322.596	7.239940e+001	8.135936e+000	125	38	9.374380e+000	0	0	0	0	0	0	62.7599	1	1	65	38.9429
DATA	1761	21	61	0	0	A_42_P481696	NM_022508	1962.22	322.75	1.043735e+003	1.044401e+002	944.5	36	8.562434e+000	0	0	0	0	0	0	900.456	1	1	45.1352	37.6207
DATA	1762	21	62	0	0	A_64_P033755	AABR03073220	1987.82	323.031	6.376739e+001	7.396571e+000	119	36	7.671901e+000	0	0	0	0	0	0	54.7439	1	1	45.835	36.4839
DATA	1763	21	63	0	0	A_64_P115980	NM_001109458	2013.5	323	1.916699e+002	1.953356e+001	226	40	1.020736e+001	0	0	0	0	0	0	163.733	1	1	54.1152	38.6154
DATA	1764	21	64	0	0	A_64_P001426	NM_001126301	2038.43	322.761	7.437751e+001	8.345311e+000	126	44	8.499412e+000	0	0	0	0	0	0	63.2308	1	1	46.5243	43
DATA	1765	21	65	0	0	A_64_P012987	NM_001108668	2063.79	322.806	7.234135e+002	7.244124e+001	657	38.5	9.963593e+000	0	0	0	0	0	0	612.033	1	1	47.5395	40.2188
DATA	1767	21	67	0	0	A_42_P668289	TC585832	2114.75	323	2.026817e+003	2.027180e+002	1730	38	1.089460e+001	0	0	0	0	0	0	1698.52	1	1	49.1849	39.6667
DATA	1768	21	68	0	0	A_64_P052690	ENSRNOT00000036634	2140.09	322.896	4.352694e+002	4.369752e+001	430	38.5	8.979827e+000	0	0	0	0	0	0	363.081	1	1	46.8651	39.8611
DATA	1769	21	69	0	0	A_42_P593020	NM_013413	2165.77	322.833	2.079497e+001	4.397634e+000	82	42	8.355161e+000	0	0	0	1	0	0	17.267	1	1	45.835	40.6061
DATA	1770	21	70	0	0	A_64_P037303	NM_001127530	2190.69	322.704	4.828174e+002	4.843833e+001	452.5	37	5.655457e+000	0	0	0	0	0	0	399.178	1	1	47.5395	37.5652
DATA	1771	21	71	0	0	A_44_P684180	NM_001037363	2216.24	323	5.977290e+003	5.977418e+002	4849	39	6.563459e+000	0	0	0	0	0	0	4920.99	1	1	46.8651	39.2571
DATA	1772	21	72	0	0	A_64_P104743	NM_133518	2241.67	322.757	1.676902e+002	1.722206e+001	202	36	6.401272e+000	0	0	0	0	0	0	137.491	1	1	47.2035	37.3913
DATA	1773	21	73	0	0	A_44_P941132	NM_001108128	2266.88	322.87	3.459300e+003	3.459525e+002	2771	35	9.322568e+000	0	0	0	0	0	0	2825.46	1	1	46.8651	37.8438
DATA	1774	21	74	0	0	A_44_P187080	NM_001110823	2292.4	323.093	1.390460e+004	1.390466e+003	10946	41	7.724633e+000	0	0	0	0	0	0	11315.5	1	1	49.1849	40.7931
DATA	1775	21	75	0	0	A_42_P574960	ENSRNOT00000068719	2317.91	322.969	3.696696e+002	3.717925e+001	370	41	8.568835e+000	0	0	0	0	0	0	299.796	1	1	46.5243	39.2703
DATA	1776	21	76	0	0	A_64_P094850	A_64_P094850	2343.5	323.352	5.869753e+001	7.091803e+000	110	40	8.842798e+000	0	0	0	0	0	0	47.4534	1	1	57.5363	39.8485
DATA	1777	21	77	0	0	A_43_P13418	NM_172042	2368.65	322.8	3.639553e+003	3.639772e+002	2973	42	7.345452e+000	0	0	0	0	0	0	2933.73	1	1	45.4864	42.2069
DATA	1778	21	78	66	-1	(-)3xSLv1	NegativeControl	2394.42	323.427	4.017755e+000	4.001752e+000	58	43	7.090030e+000	0	0	0	0	0	0	-5.04599	0	0	57.5363	41.75
DATA	1779	21	79	0	0	A_44_P321594	ENSRNOT00000006966	2419.59	323.229	3.576365e+001	5.373737e+000	89	45	1.004919e+001	0	0	0	0	0	0	28.6899	1	1	47.2035	46.1154
DATA	1780	21	80	0	0	A_44_P792531	NM_001025700	2445	323.455	1.166718e+002	1.233978e+001	156	42	7.253197e+000	0	0	0	0	0	0	93.4199	1	1	55.8519	44.3125
DATA	1781	21	81	0	0	A_43_P14795	NM_001044248	2470.3	322.916	5.842057e+002	5.855905e+001	527	48	5.146844e+000	0	0	0	0	0	0	467.031	1	1	47.2035	48.36
DATA	1782	21	82	0	0	A_42_P671502	NM_053467	2495.59	323.247	3.743636e+003	3.743853e+002	2937	42	1.423470e+001	0	0	0	0	0	0	2989.56	1	1	48.5334	45.28
DATA	1783	21	83	66	1	DarkCorner	DarkCorner	2520.93	324.074	4.047521e+000	4.031399e+000	57	39	8.773474e+000	0	0	0	0	0	0	-4.40648	0	0	53.5237	39.4231
DATA	1784	21	84	66	1	DarkCorner	DarkCorner	2546.5	323.5	4.048824e+000	4.032697e+000	58	38	8.855823e+000	0	0	0	0	0	0	-4.71152	0	0	57.5363	39.7805
DATA	1785	21	85	66	1	DarkCorner	DarkCorner	2572.1	323.522	4.047786e+000	4.031664e+000	59	41	8.640305e+000	0	0	0	0	0	0	-3.62341	0	0	47.5395	41.5366
DATA	1786	22	1	66	1	DarkCorner	DarkCorner	451.5	329	3.685002e+000	3.674665e+000	65	42	7.316114e+000	0	0	0	0	0	0	1.56522	0	0	54.1152	42.4054
DATA	1787	22	2	66	1	DarkCorner	DarkCorner	476.197	329.212	3.670457e+000	3.655837e+000	60	38	8.777537e+000	0	0	0	0	0	0	-2.29292	0	0	46.1809	37.3871
DATA	1788	22	3	66	1	DarkCorner	DarkCorner	502.033	328.689	3.655778e+000	3.641216e+000	55	38	8.270080e+000	0	0	0	0	0	0	-6.38444	0	0	44.0646	38.625
DATA	1789	22	4	0	0	A_42_P704824	NM_001009640	527.634	328.93	1.195360e+002	1.249154e+001	165	37	9.269907e+000	0	0	0	0	0	0	106.061	1	1	47.5395	37.7419
DATA	1790	22	5	0	0	A_42_P517554	NM_001107060	552.937	329.111	7.764327e+001	8.563247e+000	131	36	7.219161e+000	0	0	0	0	0	0	69.169	1	1	45.4864	35.5
DATA	1791	22	6	0	0	A_42_P586883	NM_001106416	578.53	329.106	3.487476e+001	5.010273e+000	93	36	8.307579e+000	0	0	0	0	0	0	31.1931	1	1	45.4864	35.8571
DATA	1792	22	7	0	0	A_64_P060302	BF559343	604	329	1.941382e+002	1.974172e+001	236	37	8.444545e+000	0	0	0	0	0	0	174.325	1	1	54.9904	36.8966
DATA	1793	22	8	0	0	A_64_P055418	NM_001025641	629.5	329.352	5.898720e+000	3.617539e+000	66	38	8.267391e+000	0	0	0	0	0	0	5.31761	1	0	57.5363	37.7241
DATA	1794	22	9	0	0	A_44_P317600	NM_012612	654.739	328.812	1.634055e+002	1.672300e+001	199	36	6.145406e+000	0	0	0	0	0	0	147.851	1	1	46.5243	36.8621
DATA	1795	22	10	0	0	A_44_P433359	NM_022710	680.418	329.427	2.303825e+002	2.330900e+001	275	37	4.660057e+000	0	0	0	0	0	0	209.253	1	1	57.5363	37.129
DATA	1796	22	11	0	0	A_42_P788480	NM_019194	705.338	329.162	6.373603e+003	6.373701e+002	5726	37	8.386301e+000	0	0	0	0	0	0	5809.28	1	1	49.1849	38.5172
DATA	1797	22	12	0	0	A_44_P269808	NM_001025281	731	329.455	4.869605e+001	6.007154e+000	106	39	7.864555e+000	0	0	0	0	0	0	44.543	1	1	55.8519	38.2683
DATA	1798	22	13	0	0	A_64_P108165	NM_001108889	756.418	329.427	1.081582e+001	3.668757e+000	72	41	1.182129e+001	0	0	0	0	0	0	9.92669	1	0	57.5363	41.1667
DATA	1799	22	14	0	0	A_42_P581567	NM_001011899	781.582	329.427	9.182937e+001	9.825370e+000	150	39	9.697646e+000	0	0	0	0	0	0	84.5505	1	1	57.5363	38.4828
DATA	1800	22	15	0	0	A_42_P746029	NM_144748	807.092	328.631	2.998894e+001	4.596954e+000	90	38	8.372144e+000	0	0	0	0	0	0	27.6947	1	1	45.1352	37.9697
DATA	1801	22	16	0	0	A_42_P481087	XM_232226	832.227	328.727	5.415884e+002	5.427014e+001	556.5	35	1.005236e+001	0	0	0	0	0	0	501.618	1	1	45.4864	36.25
DATA	1802	22	17	0	0	A_64_P031020	ENSRNOT00000032728	857.743	329.614	4.851459e+000	3.497648e+000	66	37.5	1.090904e+001	0	0	0	0	0	0	4.50646	1	0	47.5395	39.5789
DATA	1803	22	18	0	0	A_44_P344228	NM_183051	883.418	329.427	3.417780e+001	4.859730e+000	92	37	6.232701e+000	0	0	0	0	0	0	31.8302	1	1	57.5363	37.5714
DATA	1804	22	19	0	0	A_64_P009798	NM_021742	908.582	329.427	3.460306e+000	3.446665e+000	61	40	5.625289e+000	0	0	0	0	0	0	0.291892	0	0	57.5363	41.5185
DATA	1805	22	20	0	0	A_44_P775747	ENSRNOT00000051510	933.868	329.691	1.180157e+004	1.180162e+003	11071.5	39	5.409124e+000	0	0	0	0	0	0	11042.4	1	1	45.835	39.4828
DATA	1806	22	21	0	0	A_44_P349475	NM_031333	958.847	329.306	8.256862e+002	8.263991e+001	828	38.5	9.442913e+000	0	0	0	0	0	0	774.096	1	1	47.8731	41.25
DATA	1807	22	22	0	0	A_64_P114198	NM_001080153	984.568	329.392	1.223262e+003	1.223741e+002	1163	36	7.247841e+000	0	0	0	0	0	0	1149	1	1	49.1849	37.1176
DATA	1808	22	23	0	0	A_42_P719060	NM_001108994	1010.33	329.5	1.756045e+003	1.756378e+002	1652	37	7.921412e+000	0	0	0	0	0	0	1652.22	1	1	57.5363	37.9655
DATA	1809	22	24	0	0	A_44_P163243	NM_175759	1035.5	329.5	3.428468e+000	3.414812e+000	62	45	1.209091e+001	0	0	0	0	0	0	-1.3285	0	0	57.5363	44.24
DATA	1810	22	25	0	0	A_44_P156864	A_44_P156864	1061.11	329.5	8.320126e+001	8.992027e+000	141.5	39.5	9.484881e+000	0	0	0	0	0	0	78.4914	1	1	56.9804	40.5
DATA	1811	22	26	0	0	A_42_P758052	NM_001031645	1086.1	329.125	2.533377e+003	2.533606e+002	2403	41	1.687959e+001	0	0	0	0	0	0	2392.26	1	1	46.8651	48.4286
DATA	1812	22	27	0	0	A_44_P280659	NM_001100971	1111.17	329.261	6.906749e+001	7.700282e+000	124	47	1.043662e+001	0	0	0	0	0	0	65.2726	1	1	46.1809	46.1389
DATA	1813	22	28	0	0	A_42_P768380	NM_001100158	1136.76	329.141	3.744810e+003	3.744965e+002	3427.5	45	1.163398e+001	0	0	0	0	0	0	3541.06	1	1	47.5395	43.9429
DATA	1814	22	29	0	0	A_44_P486312	NM_144737	1162.37	329.057	2.888350e+002	2.908310e+001	325.5	40	7.838895e+000	0	0	0	0	0	0	273.214	1	1	46.8651	39.3448
DATA	1815	22	30	0	0	A_64_P005288	XM_575125	1188	329.545	4.485796e+001	5.629252e+000	108.5	38	7.335288e+000	0	0	0	0	0	0	42.4391	1	1	55.8519	37.5
DATA	1816	22	31	0	0	A_64_P101885	ENSRNOT00000058341	1213.17	329.7	1.866749e+002	1.897481e+001	233	39	8.053985e+000	0	0	0	0	0	0	176.593	1	1	47.2035	39
DATA	1817	22	32	0	0	A_64_P113645	ENSRNOT00000055538	1238.58	329.573	3.416005e+000	3.402399e+000	59.5	38.5	8.032193e+000	0	0	0	0	0	0	-3.9922	0	0	57.5363	39
DATA	1818	22	33	0	0	A_42_P588869	NM_001008348	1263.97	329.558	1.449490e+003	1.449889e+002	1397	43	7.594979e+000	0	0	0	1	0	0	1369.95	1	1	49.1849	41.9394
DATA	1819	22	34	0	0	A_64_P028027	NM_001000473	1289.58	329.573	1.879664e+001	3.891165e+000	84	37	6.919395e+000	0	0	0	0	0	0	17.7509	1	1	57.5363	37.1563
DATA	1820	22	35	0	0	A_42_P468805	NM_145721	1315	329.545	2.366691e+002	2.391139e+001	290.5	38	6.872465e+000	0	0	0	0	0	0	223.273	1	1	55.8519	37.0769
DATA	1821	22	36	0	0	A_42_P522194	NM_012914	1340.12	329.616	7.227204e+001	7.993312e+000	134.5	38	7.399661e+000	0	0	0	0	0	0	68.0975	1	1	48.5334	38.2963
DATA	1822	22	37	0	0	A_64_P002969	A_64_P002969	1365.47	329.281	5.445817e+000	3.462979e+000	67	38	6.546580e+000	0	0	0	0	0	0	5.12355	1	0	44.7812	37.6957
DATA	1823	22	38	0	0	A_42_P453935	NM_001198580	1390.76	329.394	2.249161e+003	2.249422e+002	2126	43	6.925075e+000	0	0	0	0	0	0	2112.52	1	1	47.5395	42.96
DATA	1824	22	39	0	0	A_42_P523551	NM_001014087	1416.51	329.661	3.445928e+000	3.432202e+000	63	40	8.041630e+000	0	0	0	0	0	0	-2.24445	0	0	42.2201	40.7667
DATA	1825	22	40	0	0	A_64_P046076	NM_053952	1441.68	329.453	1.310650e+003	1.311101e+002	1218	42	8.973462e+000	0	0	0	0	0	0	1226.05	1	1	49.1849	42.1389
DATA	1826	22	41	0	0	A_42_P607770	NM_001134616	1467	329.5	4.712347e+003	4.712473e+002	4270.5	41	9.751537e+000	0	0	0	0	0	0	4397.91	1	1	48.5334	40.3226
DATA	1827	22	42	0	0	A_64_P089400	NM_022605	1492.5	330	8.962311e+001	9.605650e+000	147	36	7.786692e+000	0	0	0	0	0	0	83.4331	1	1	54.1152	36.8485
DATA	1828	22	43	0	0	A_64_P072064	FQ221714	1518.39	329.931	6.924187e+004	6.924188e+003	63148.5	38	9.671756e+000	0	0	0	0	0	0	64278.4	1	1	53.8203	39
DATA	1829	22	44	0	0	A_42_P555125	NM_012913	1543	329.797	4.453126e+003	4.453262e+002	4044	35.5	9.097488e+000	0	0	0	0	0	0	4122.07	1	1	46.8651	36.4167
DATA	1830	22	45	0	0	A_42_P768776	NM_001108443	1568.39	329.806	3.162912e+003	3.163104e+002	2956.5	40.5	6.897971e+000	0	0	0	0	0	0	2918.61	1	1	46.5243	38.7857
DATA	1831	22	46	0	0	A_42_P593930	NM_001195606	1594.5	330	2.413204e+001	4.250228e+000	88	37	7.112309e+000	0	0	0	0	0	0	22.1926	1	1	54.1152	36.5806
DATA	1832	22	47	0	0	A_64_P013545	NM_001115046	1619.54	329.779	1.800968e+002	1.834870e+001	224.5	39.5	7.581305e+000	0	0	0	0	0	0	165.049	1	1	46.8651	40.0714
DATA	1833	22	48	0	0	A_42_P548520	NM_001100834	1644.49	329.87	1.983579e+003	1.983892e+002	1856.5	42	8.871031e+000	0	0	0	0	0	0	1811.32	1	1	47.2035	42.8235
DATA	1834	22	49	0	0	A_42_P692317	NM_001107565	1670	329.797	5.566639e+002	5.577865e+001	560	41	8.303537e+000	0	0	0	0	0	0	506.371	1	1	46.8651	40.4318
DATA	1835	22	50	0	0	A_64_P078303	NM_001106526	1696.07	330.129	2.963358e+001	4.625379e+000	88	43	8.394100e+000	0	0	0	0	0	0	26.8474	1	1	46.8651	42.4333
DATA	1836	22	51	0	0	A_64_P031771	A_64_P031771	1720.65	330.226	4.148753e+001	5.470416e+000	101	43	1.052101e+001	0	0	0	0	0	0	37.4377	1	1	44.4243	42.3478
DATA	1837	22	52	0	0	A_44_P393929	NM_001039713	1746.66	329.935	8.576496e+001	9.294165e+000	139	40	7.670675e+000	0	0	0	0	0	0	77.0545	1	1	49.1849	41.1579
DATA	1838	22	53	0	0	A_44_P135730	XM_228802	1772.09	330.065	1.298547e+002	1.347443e+001	180.5	39	6.402955e+000	0	0	0	0	0	0	116.158	1	1	54.4085	37.9545
DATA	1839	22	54	0	0	A_43_P23215	NM_001025737	1797.01	329.897	2.475004e+002	2.501234e+001	286	41	9.196273e+000	0	0	0	0	0	0	220.42	1	1	46.8651	40
DATA	1840	22	55	0	0	A_64_P118427	A_64_P118427	1822.69	329.718	6.105054e+001	7.102531e+000	119	41	9.413229e+000	0	0	0	0	0	0	54.1186	1	1	47.5395	40.1875
DATA	1841	22	56	0	0	A_64_P075560	NM_001037526	1848.42	330.427	2.459709e+001	4.398584e+000	89.5	41	8.668572e+000	0	0	0	0	0	0	21.7031	1	1	57.5363	41.4595
DATA	1842	22	57	0	0	A_64_P150311	NM_177935	1873.29	330.562	3.765194e+001	5.253347e+000	98	41	8.639743e+000	0	0	0	0	0	0	33.0686	1	1	48.5334	42.25
DATA	1843	22	58	0	0	A_44_P272393	NM_001106892	1899	330.455	4.683896e+001	5.957450e+000	107	39	6.494145e+000	0	0	0	0	0	0	40.9374	1	1	55.8519	38
DATA	1844	22	59	0	0	A_44_P421887	NM_001191565	1924.11	330.296	1.031891e+002	1.096189e+001	156.5	36	8.565031e+000	0	0	0	0	0	0	89.7549	1	1	47.5395	37.122
DATA	1845	22	60	0	0	A_64_P045102	A_64_P045102	1949.96	330.103	1.190562e+003	1.191143e+002	1090.5	34	6.810597e+000	0	0	0	0	0	0	1030.41	1	1	46.8651	34.2069
DATA	1846	22	61	0	0	A_42_P818546	NM_001191600	1974.77	329.703	3.978964e+002	3.996461e+001	404.5	37	7.249225e+000	0	0	0	0	0	0	342.714	1	1	45.1352	37.5143
DATA	1847	22	62	0	0	A_42_P777445	ENSRNOT00000012684	2000.42	329.833	4.968989e+001	6.227666e+000	107	40	9.448502e+000	0	0	0	0	0	0	42.588	1	1	48.2044	40.375
DATA	1848	22	63	0	0	A_64_P111709	NM_001000554	2026	330.455	1.376636e+002	1.427386e+001	179.5	39	8.015994e+000	0	0	0	0	0	0	117.417	1	1	55.8519	38.5517
DATA	1849	22	64	0	0	A_64_P107509	NM_001191874	2051.42	330.427	5.079321e+001	6.337892e+000	108	44	8.235492e+000	0	0	0	0	0	0	43.1129	1	1	57.5363	43.64
DATA	1850	22	65	0	0	A_64_P121836	ENSRNOT00000007828	2076.58	330.427	2.451894e+001	4.529761e+000	85	38	8.786413e+000	0	0	0	0	0	0	20.7126	1	1	57.5363	37.6429
DATA	1851	22	66	0	0	A_42_P684281	XR_008784	2102.33	330.5	1.373359e+003	1.373892e+002	1192	36	7.505465e+000	0	0	0	0	0	0	1154.6	1	1	57.5363	36.4643
DATA	1852	22	67	0	0	A_64_P060804	ENSRNOT00000000462	2127.5	330.5	3.808694e+001	5.411933e+000	97	42	1.361854e+001	0	0	0	0	0	0	31.8726	1	1	57.5363	43.2581
DATA	1853	22	68	0	0	A_64_P075675	A_64_P075675	2152.89	330.5	2.178102e+002	2.212083e+001	247.5	38	1.008927e+001	0	0	0	0	0	0	181.442	1	1	56.9804	39.1714
DATA	1854	22	69	0	0	A_44_P254973	NM_198051	2178.25	329.764	4.127361e+001	5.664726e+000	98	37.5	8.092923e+000	0	0	0	0	0	0	34.2268	1	1	47.2035	37.5667
DATA	1855	22	70	0	0	A_42_P492976	NM_001126099	2203.38	330.237	2.827496e+002	2.854215e+001	287	37	6.771426e+000	0	0	0	0	0	0	233.493	1	1	49.1849	38.931
DATA	1856	22	71	0	0	A_42_P619114	NM_001014204	2228.89	329.778	6.940749e+001	7.967663e+000	119	39	8.172864e+000	0	0	0	0	0	0	57.0748	1	1	44.7812	38.9355
DATA	1857	22	72	0	0	A_42_P541625	NM_001126090	2254.38	330.237	1.292127e+004	1.292133e+003	10364	36.5	9.610982e+000	0	0	0	0	0	0	10583.8	1	1	49.1849	37.875
DATA	1858	22	73	0	0	A_42_P469136	NM_001044288	2279.89	330.5	5.877193e+002	5.890404e+001	536.5	37.5	9.380071e+000	0	0	0	0	0	0	479.601	1	1	56.9804	40.1176
DATA	1859	22	74	0	0	A_64_P101480	ENSRNOT00000034261	2305.26	330.385	4.465347e+001	5.966243e+000	98	36.5	9.350808e+000	0	0	0	0	0	0	36.3099	1	1	50.1463	38.6765
DATA	1860	22	75	0	0	A_64_P078554	ENSRNOT00000020079	2331.31	330.831	3.009450e+002	3.035522e+001	301.5	42	1.032285e+001	0	0	0	0	0	0	243.904	1	1	49.5074	39.8065
DATA	1861	22	76	0	0	A_44_P131067	ENSRNOT00000045483	2356.11	330.5	6.815427e+000	4.039788e+000	71	40	8.250550e+000	0	0	0	0	0	0	5.50713	1	0	65	40.1563
DATA	1862	22	77	0	0	A_64_P055699	ENSRNOT00000010871	2381.35	330.222	5.062867e+002	5.078587e+001	462.5	43	7.305412e+000	0	0	0	0	0	0	407.975	1	1	47.5395	41.5357
DATA	1863	22	78	0	0	A_64_P117203	NM_001106002	2406.63	330.411	7.362325e+003	7.362434e+002	5857.5	43.5	5.935611e+000	0	0	0	0	0	0	5918.59	1	1	48.5334	42.75
DATA	1864	22	79	0	0	A_44_P357870	NM_031559	2432.09	330.453	2.473481e+002	2.505786e+001	265	45.5	9.258485e+000	0	0	0	1	0	0	198.431	1	1	48.8603	46.7333
DATA	1865	22	80	0	0	A_42_P732101	NM_022624	2457.44	330.479	3.428457e+003	3.428692e+002	2733	45	8.290946e+000	0	0	0	0	0	0	2745.74	1	1	48.2044	44.1613
DATA	1866	22	81	0	0	A_64_P155054	XM_001062835	2483	330.545	5.901171e+001	7.141923e+000	108.5	43	7.682815e+000	0	0	0	0	0	0	47.1982	1	1	55.8519	43.1111
DATA	1867	22	82	0	0	A_44_P534154	NM_001108852	2508.5	330.648	7.198261e+001	8.247851e+000	121	37	9.358172e+000	0	0	0	0	0	0	57.5213	1	1	57.5363	40.1538
DATA	1868	22	83	66	1	DarkCorner	DarkCorner	2533.58	330.573	4.044407e+000	4.028298e+000	56	36	1.006829e+001	0	0	0	0	0	0	-5.47897	0	0	57.5363	38.5
DATA	1869	22	84	66	1	DarkCorner	DarkCorner	2559.26	330.287	4.044535e+000	4.028426e+000	56	37	7.489214e+000	0	0	0	0	0	0	-6.31038	0	0	52.0157	38.3704
DATA	1870	22	85	66	1	DarkCorner	DarkCorner	2584.14	330.726	4.042270e+000	4.026169e+000	60.5	36	8.476407e+000	0	0	0	0	0	0	-3.52987	0	0	51.7088	36.4901
DATA	1871	23	1	66	1	DarkCorner	DarkCorner	439	336.455	3.686742e+000	3.674720e+000	62.5	45	1.031862e+001	0	0	0	0	0	0	1.22544	0	0	55.8519	46.1264
DATA	1872	23	2	66	1	DarkCorner	DarkCorner	464.418	336.427	3.672151e+000	3.657524e+000	57.5	38	9.224904e+000	0	0	0	0	0	0	-4.30375	0	0	65	37.9333
DATA	1873	23	3	66	1	DarkCorner	DarkCorner	489.077	336.397	3.657979e+000	3.643409e+000	60	37.5	8.552103e+000	0	0	0	0	0	0	-1.44669	0	0	49.8279	36.8
DATA	1874	23	4	0	0	A_44_P246268	NM_001106862	515.107	336.5	1.805896e+001	4.053022e+000	75	40	7.393843e+000	0	0	0	0	0	0	16.0137	1	0	56.9804	39.9143
DATA	1875	23	5	0	0	A_64_P028396	ENSRNOT00000051835	540.176	336.365	3.034212e+001	4.719081e+000	90.5	36	7.320169e+000	0	0	0	0	0	0	27.011	1	1	48.8603	35.6571
DATA	1876	23	6	0	0	A_64_P020451	XM_219275	565.893	336.5	2.386295e+001	4.318894e+000	82	35.5	6.451959e+000	0	0	0	0	0	0	21.3289	1	1	56.9804	34.9722
DATA	1878	23	8	0	0	A_64_P106264	ENSRNOT00000029671	616.58	336.188	1.304701e+003	1.305190e+002	1244	40	1.017759e+001	0	0	0	0	0	0	1175.17	1	1	47.2035	39.6
DATA	1879	23	9	0	0	A_44_P524805	NM_214832	642.338	336.392	2.204445e+001	4.185830e+000	82	37	6.925941e+000	0	0	0	0	0	0	19.9331	1	1	48.5334	37.7407
DATA	1880	23	10	0	0	A_42_P764228	NM_031707	667.5	336.5	2.284579e+003	2.284854e+002	2115.5	36	5.198901e+000	0	0	0	0	0	0	2073.42	1	1	57.5363	37.0286
DATA	1881	23	11	0	0	A_44_P533760	NM_182843	692.627	336.64	7.278757e+002	7.287324e+001	728	37	5.015690e+000	0	0	0	0	0	0	662.982	1	1	48.8603	35.4286
DATA	1882	23	12	0	0	A_42_P524610	NM_001108992	717.868	336.5	1.252208e+003	1.252703e+002	1173	36	7.066504e+000	0	0	0	0	0	0	1144.53	1	1	49.8279	35
DATA	1883	23	13	0	0	A_42_P570756	NM_134345	743.5	336.5	8.893662e+004	8.893663e+003	81188	39.5	9.382352e+000	0	0	0	0	0	0	81568.5	1	1	57.5363	39.8235
DATA	1884	23	14	0	0	A_44_P362969	NM_053688	769.107	336.5	4.319704e+001	5.557524e+000	103.5	42	1.316776e+001	0	0	0	0	0	0	39.7492	1	1	56.9804	41.84
DATA	1885	23	15	0	0	A_44_P308197	NM_001012190	794.031	336.215	1.535560e+003	1.535956e+002	1472	38	8.875219e+000	0	0	0	0	0	0	1417.3	1	1	45.835	37.9268
DATA	1886	23	16	0	1	ETG05_36762	ETG05_36762	819.493	336.313	3.530792e+001	4.954363e+000	98	38	1.011223e+001	0	0	0	0	0	0	32.6869	1	1	46.5243	37.9143
DATA	1887	23	17	0	0	A_42_P744033	NM_001100846	845.418	336.573	1.891590e+002	1.923071e+001	246	36.5	1.105218e+001	0	0	0	0	0	0	175.63	1	1	57.5363	38.0294
DATA	1888	23	18	0	0	A_42_P726363	NM_031536	870.582	336.573	1.798245e+001	3.896046e+000	75.5	36	6.647345e+000	0	0	0	0	0	0	16.7405	1	1	57.5363	37.5172
DATA	1889	23	19	0	0	A_64_P010393	NM_053363	895.671	336.753	2.754292e+003	2.754508e+002	2547	40	7.450884e+000	0	0	0	0	0	0	2570.45	1	1	48.2044	40.1481
DATA	1890	23	20	0	0	A_42_P612220	NM_001191711	921.418	336.573	4.405624e+002	4.419031e+001	475	39	6.675666e+000	0	0	0	0	0	0	412.113	1	1	57.5363	38.625
DATA	1891	23	21	0	0	A_44_P393551	NM_012567	946.437	336.479	2.007413e+004	2.007416e+003	18027	39	9.279062e+000	0	0	0	0	0	0	18817.1	1	1	48.2044	41.6207
DATA	1892	23	22	0	0	A_44_P278688	NM_053682	971.8	336.6	8.761060e+002	8.767755e+001	865	37	7.333932e+000	0	0	0	0	0	0	822.846	1	1	49.1849	38.0857
DATA	1893	23	23	0	0	A_44_P186989	NM_001000076	997.582	336.573	3.433419e+000	3.434917e+000	66.5	37	8.313233e+000	0	0	0	0	0	0	3.03441	0	0	57.5363	38.7879
DATA	1894	23	24	0	0	A_42_P640277	NM_001003401	1022.63	336.5	2.463096e+004	2.463099e+003	23402.5	38	1.188116e+001	0	0	0	0	0	0	23209.3	1	1	49.8279	40.1905
DATA	1895	23	25	0	0	A_44_P398792	NM_053867	1048.18	336.361	7.718883e+003	7.718958e+002	7429.5	41	1.064379e+001	0	0	0	0	0	0	7282.95	1	1	47.8731	42.9032
DATA	1896	23	26	0	0	A_64_P052552	ENSRNOT00000056797	1073.58	336.573	7.545419e+001	8.278636e+000	132	39	8.300759e+000	0	0	0	0	0	0	71.2736	1	1	57.5363	41.0455
DATA	1897	23	27	0	0	A_64_P119254	NM_001013202	1098.72	336.649	3.416804e+000	3.405802e+000	65.5	41.5	9.264128e+000	0	0	0	0	0	0	1.25962	0	0	41.8414	43.75
DATA	1898	23	28	0	0	A_64_P159614	NM_053614	1124.13	336.623	1.852842e+003	1.853154e+002	1807	45	1.321433e+001	0	0	0	0	0	0	1752.93	1	1	46.8651	46.2162
DATA	1899	23	29	0	0	A_42_P814107	NM_001024750	1149.71	336.029	8.890156e+001	9.517978e+000	147	40	8.550689e+000	0	0	0	0	0	0	84.1408	1	1	46.8651	40.3429
DATA	1900	23	30	0	0	A_64_P150751	NM_212494	1174.79	336.806	3.147605e+002	3.165899e+001	361	38	7.874128e+000	0	0	0	0	0	0	297.995	1	1	47.5395	36.5758
DATA	1902	23	32	0	0	A_44_P838888	ENSRNOT00000038829	1225.88	336.65	2.755882e+001	4.376129e+000	91.5	36	7.580146e+000	0	0	0	0	0	0	26.0846	1	1	43.7019	37.7
DATA	1903	23	33	0	0	A_43_P12927	NM_053769	1251.17	337	1.805451e+002	1.837201e+001	236	38	8.314258e+000	0	0	0	0	0	0	170.815	1	1	46.8651	38.4242
DATA	1904	23	34	0	0	A_64_P140806	A_64_P140806	1276.64	336.87	1.487242e+004	1.487246e+003	13694	39	7.125352e+000	0	0	0	0	0	0	14061.1	1	1	46.8651	39.4722
DATA	1905	23	35	0	0	A_42_P607026	NM_001106839	1301.88	336.905	3.319545e+003	3.319719e+002	3178	37.5	6.853704e+000	0	0	0	0	0	0	3135.63	1	1	47.5395	37.2353
DATA	1906	23	36	0	0	A_44_P272186	NM_001107950	1327.73	337.045	2.308614e+001	4.118100e+000	87	38.5	7.838313e+000	0	0	0	0	0	0	21.7821	1	1	45.835	38.5714
DATA	1907	23	37	0	0	A_44_P226658	NM_017046	1352.94	336.969	3.059795e+001	4.585099e+000	92	38	9.133996e+000	0	0	0	0	0	0	28.8303	1	1	45.835	38.8667
DATA	1908	23	38	0	0	A_64_P119279	NM_001108109	1378.24	336.971	8.729363e+003	8.729430e+002	8057	40	7.409800e+000	0	0	0	0	0	0	8212.07	1	1	46.1809	41.2174
DATA	1909	23	39	0	0	A_44_P1042876	NM_212504	1403.63	336.873	8.970319e+002	8.976861e+001	882	41	6.789302e+000	0	0	0	0	0	0	842.343	1	1	47.5395	41.8065
DATA	1910	23	40	0	0	A_64_P119607	ENSRNOT00000037601	1429.09	336.896	1.578684e+002	1.615587e+001	209.5	42	8.286813e+000	0	0	0	0	0	0	147.944	1	1	46.8651	42.8667
DATA	1911	23	41	0	0	A_42_P784252	NM_133557	1454.44	336.973	5.947623e+003	5.947722e+002	5409	39.5	1.298269e+001	0	0	0	0	0	0	5561.33	1	1	48.5334	42.4286
DATA	1912	23	42	0	0	A_44_P1033194	NM_139328	1479.71	336.833	1.902484e+003	1.902796e+002	1816	36	8.742344e+000	0	0	0	0	0	0	1774.57	1	1	45.835	39
DATA	1913	23	43	0	0	A_42_P800048	NM_207610	1505.09	336.672	3.563006e+003	3.563174e+002	3246	35.5	7.563341e+000	0	0	0	0	0	0	3314.61	1	1	45.1352	36.6579
DATA	1914	23	44	0	0	A_43_P11525	NM_012710	1530.58	337.427	5.497589e+001	6.500185e+000	117.5	32	1.001287e+001	0	0	0	0	0	0	51.0011	1	1	57.5363	35.5152
DATA	1915	23	45	0	0	A_64_P019037	NM_001013886	1555.78	336.594	2.725523e+004	2.725525e+003	25239	40	6.776382e+000	0	0	0	0	0	0	25206.5	1	1	46.5243	37.875
DATA	1916	23	46	0	0	A_64_P003378	NM_001024336	1581.63	337.07	2.203598e+002	2.231069e+001	269.5	38	7.316501e+000	0	0	0	0	0	0	203.137	1	1	47.5395	37.7419
DATA	1917	23	47	0	0	A_44_P258855	NM_053431	1606.63	336.735	3.070278e+003	3.070478e+002	2857	39	8.164966e+000	0	0	0	0	0	0	2820.74	1	1	46.5243	40
DATA	1918	23	48	0	1	ETG09_35454	ETG09_35454	1632.42	337.427	3.715905e+000	3.534241e+000	69	40	8.464474e+000	0	0	0	0	0	0	3.40175	1	0	57.5363	40.7742
DATA	1919	23	49	0	0	A_64_P089677	NM_001105977	1657.58	337.427	1.056982e+002	1.114297e+001	157	41	9.386790e+000	0	0	0	0	0	0	96.4042	1	1	57.5363	41.6129
DATA	1920	23	50	0	0	A_64_P013609	A_64_P013609	1683.42	337.427	8.286807e+000	3.637372e+000	72	41	1.015392e+001	0	0	0	0	0	0	7.52825	1	0	57.5363	41.1892
DATA	1921	23	51	0	0	A_44_P357470	NM_030849	1708.58	337.427	3.726927e+002	3.743853e+001	392	40.5	9.079310e+000	0	0	0	0	0	0	337.223	1	1	57.5363	39.7143
DATA	1922	23	52	0	0	A_44_P404064	ENSRNOT00000015387	1733.63	337.37	5.465287e+002	5.476939e+001	541	41	8.621843e+000	0	0	0	0	0	0	492.479	1	1	48.2044	41.5185
DATA	1923	23	53	0	0	A_64_P092167	A_64_P092167	1759.76	336.92	3.028340e+001	4.694138e+000	91.5	42	8.880154e+000	0	0	0	0	0	0	27.1666	1	1	48.8603	41.7143
DATA	1924	23	54	0	0	A_42_P463036	ENSRNOT00000038596	1784.37	337.043	1.767410e+003	1.767777e+002	1591	42	8.108475e+000	0	0	0	0	0	0	1578.75	1	1	46.8651	41.8
DATA	1925	23	55	0	0	A_44_P1003794	NM_012576	1809.72	336.971	1.170208e+003	1.170767e+002	1062	42	9.228641e+000	0	0	0	0	0	0	1040.58	1	1	46.1809	40.9333
DATA	1926	23	56	0	0	A_64_P099006	BC105831	1835.5	337.5	3.649646e+000	3.648095e+000	68.5	41	8.894915e+000	0	0	0	0	0	0	2.72211	0	0	65	42.0732
DATA	1927	23	57	0	0	A_42_P795467	NM_001108055	1860.69	337.338	2.279206e+002	2.308281e+001	269	41	9.346504e+000	0	0	0	1	0	0	200.797	1	1	48.5334	42
DATA	1928	23	58	0	0	A_42_P629321	NM_031590	1886.5	337.5	2.337531e+001	4.351024e+000	84.5	40	7.941739e+000	0	0	0	0	0	0	20.4945	1	1	65	39.9259
DATA	1929	23	59	0	0	A_42_P549786	NM_022609	1911.44	337.389	2.540465e+003	2.540732e+002	2225	40	7.924322e+000	0	0	0	0	0	0	2216.83	1	1	48.2044	39.4444
DATA	1930	23	60	0	0	A_64_P006354	ENSRNOT00000043959	1937.11	337.5	3.497191e+001	5.095068e+000	95	34	7.088224e+000	0	0	0	0	0	0	30.3679	1	1	56.9804	35.3846
DATA	1931	23	61	0	0	A_64_P057109	A_64_P057109	1962.21	337.125	6.159543e+002	6.170787e+001	596	37	7.182624e+000	0	0	0	0	0	0	532.268	1	1	47.5395	37.4865
DATA	1932	23	62	0	0	A_44_P101361	NM_032070	1987.89	337.5	1.548064e+001	4.049285e+000	81	40	8.057737e+000	0	0	0	0	0	0	13.312	1	0	56.9804	40.6154
DATA	1933	23	63	0	0	A_64_P103354	ENSRNOT00000066893	2013.42	337.573	3.417975e+002	3.438594e+001	352.5	40	9.626139e+000	0	0	0	0	0	0	292.479	1	1	57.5363	39.6552
DATA	1934	23	64	0	0	A_42_P746868	NM_001127580	2038.32	337.417	1.309060e+004	1.309065e+003	10987	41	8.965429e+000	0	0	0	0	0	0	11148.2	1	1	48.5334	40.0741
DATA	1935	23	65	0	0	A_42_P707838	NM_012979	2063.81	337.467	1.001434e+003	1.002153e+002	883	41.5	9.267976e+000	0	0	0	0	0	0	848.729	1	1	49.5074	42.1538
DATA	1936	23	66	0	0	A_42_P628098	NM_001107991	2089.5	337.705	1.259171e+003	1.259748e+002	1117.5	38	8.492535e+000	0	0	0	0	0	0	1062.06	1	1	50.4627	38.1379
DATA	1937	23	67	0	0	A_64_P028071	ENSRNOT00000042928	2114.67	337.5	2.784819e+005	2.784819e+004	233064	42	1.215639e+001	0	0	0	0	0	0	233793	1	1	57.5363	44
DATA	1938	23	68	0	0	A_64_P002944	A_64_P002944	2140.25	337.688	3.834882e+003	3.835076e+002	3287	34	8.532358e+000	0	0	0	0	0	0	3204.66	1	1	51.0895	36.6364
DATA	1939	23	69	0	0	A_64_P072159	XM_574060	2164.93	337.81	1.521855e+001	4.155738e+000	76	38.5	8.921374e+000	0	0	0	0	0	0	12.6623	1	0	43.3362	38.5
DATA	1940	23	70	0	0	A_64_P052365	NM_001109318	2190.91	337.588	1.806118e+002	1.847418e+001	213.5	38	8.491419e+000	0	0	0	0	0	0	149.601	1	1	46.5243	40.6857
DATA	1941	23	71	0	0	A_64_P023150	ENSRNOT00000042777	2216.37	337.855	1.400153e+002	1.453475e+001	178.5	36.5	8.109072e+000	0	0	0	0	0	0	115.49	1	1	44.0646	37.7188
DATA	1942	23	72	0	0	A_44_P374902	NM_133429	2241.57	337.478	4.762275e+002	4.778354e+001	468	36.5	7.390828e+000	0	0	0	0	0	0	391.219	1	1	46.5243	38.4286
DATA	1943	23	73	0	0	A_44_P163271	NM_198733	2267.42	337.573	1.078728e+001	4.077281e+000	73.5	39.5	8.009508e+000	0	0	0	0	0	0	8.82714	1	0	57.5363	39.9063
DATA	1944	23	74	0	0	A_42_P548520	NM_001100834	2292.36	337.863	1.966268e+003	1.966664e+002	1639	37	7.626054e+000	0	0	0	0	0	0	1603.3	1	1	48.5334	38.8148
DATA	1945	23	75	0	0	A_64_P012154	XM_225935	2318.09	337.614	2.859715e+001	4.884376e+000	86	40	8.949777e+000	0	0	0	0	0	0	23.2371	1	1	57.259	39.4872
DATA	1946	23	76	0	0	A_64_P033574	NM_001000606	2343.5	338	3.987856e+000	3.975668e+000	64.5	42	8.578613e+000	0	0	0	0	0	0	1.38835	0	0	65	40.8519
DATA	1947	23	77	0	0	A_64_P027764	NM_022685	2368.94	337.725	1.857361e+002	1.899599e+001	212	42.5	7.125623e+000	0	0	0	0	0	0	150.019	1	1	46.1809	41.7941
DATA	1948	23	78	0	0	A_42_P484738	NM_022266	2394	337.797	7.405611e+002	7.416372e+001	668	41	6.310599e+000	0	0	0	0	0	0	596.646	1	1	46.8651	40.0968
DATA	1949	23	79	0	0	A_64_P036355	NM_053311	2419.14	337.789	1.642361e+004	1.642366e+003	13063	44.5	9.351931e+000	0	0	0	0	0	0	13202.6	1	1	47.2035	45.3
DATA	1950	23	80	0	0	A_42_P694928	NM_001109046	2444.76	337.829	2.516284e+002	2.548038e+001	267	41.5	7.743819e+000	0	0	0	0	0	0	201.895	1	1	48.5334	41.9688
DATA	1951	23	81	0	0	A_42_P588738	NM_133542	2470.5	338	3.612135e+001	5.401550e+000	95	42	6.397115e+000	0	0	0	0	0	0	28.9386	1	1	54.1152	43
DATA	1952	23	82	0	0	A_64_P141254	XM_001060542	2495.5	338	2.485012e+001	4.726481e+000	82	37	6.795139e+000	0	0	0	0	0	0	19.887	1	1	54.1152	38.5
DATA	1953	23	83	0	0	A_42_P546054	NM_001013873	2520.76	338	1.708886e+002	1.755606e+001	194	40	1.160057e+001	0	0	0	1	0	0	136.666	1	1	46.8651	42.64
DATA	1954	23	84	66	1	DarkCorner	DarkCorner	2546.42	338.145	4.040115e+000	4.024023e+000	57	36	7.090496e+000	0	0	0	0	0	0	-5.26822	0	0	44.0646	36.8571
DATA	1955	23	85	66	1	DarkCorner	DarkCorner	2571.82	337.922	4.039181e+000	4.023093e+000	57.5	39	8.002867e+000	0	0	0	0	0	0	-5.24159	0	0	39.8942	39.4872
DATA	1956	24	1	66	1	DarkCorner	DarkCorner	451.064	343.397	3.674745e+000	3.660781e+000	62	41.5	7.631996e+000	0	0	0	0	0	0	0.617034	0	0	49.8279	40.4091
DATA	1957	24	2	66	1	DarkCorner	DarkCorner	477.222	343.309	3.659935e+000	3.645357e+000	56	33.5	8.222461e+000	0	0	0	0	0	0	-5.38514	0	0	51.0895	34.4375
DATA	1958	24	3	0	0	A_64_P000371	NM_017308	502.5	343.5	1.044432e+003	1.045063e+002	992	39.5	7.396911e+000	0	0	0	0	0	0	925.517	1	1	52.9257	38.8333
DATA	1959	24	4	0	0	A_42_P772356	NM_001191597	527.3	343.9	2.851339e+003	2.851568e+002	2561	39	6.130613e+000	0	0	0	0	0	0	2536.64	1	1	47.2035	39.1818
DATA	1961	24	6	0	0	A_42_P470757	NM_001004075	578.437	343.521	2.397730e+003	2.397999e+002	2201	35	5.177427e+000	0	0	0	0	0	0	2149.84	1	1	48.2044	35.2333
DATA	1962	24	7	0	0	A_64_P034250	ENSRNOT00000041464	603.746	343.606	3.419173e+001	4.946646e+000	92	38	8.157622e+000	0	0	0	0	0	0	30.7752	1	1	47.5395	37.2414
DATA	1963	24	8	0	0	A_64_P065063	NM_012954	629.5	343.648	5.509902e+001	6.560447e+000	111	36	8.534996e+000	0	0	0	0	0	0	49.7848	1	1	57.5363	35.3333
DATA	1964	24	9	0	0	A_64_P088866	ENSRNOT00000049194	654.582	343.573	3.877960e+002	3.894156e+001	418.5	36	6.048016e+000	0	0	0	0	0	0	351.68	1	1	57.5363	37.3871
DATA	1965	24	10	0	0	A_44_P111759	NM_001000956	679.893	343.853	3.549094e+000	3.551046e+000	65	35.5	5.238563e+000	0	0	0	0	0	0	3.07318	0	0	47.8731	35.0938
DATA	1966	24	11	0	0	A_64_P045019	ENSRNOT00000032417	705.333	343.667	1.083447e+003	1.084019e+002	1083.5	36	7.950654e+000	0	0	0	0	0	0	989.625	1	1	46.8651	36.2903
DATA	1967	24	12	0	0	A_64_P138989	XM_001053562	730.907	343.935	6.140904e+001	7.073382e+000	119	37	7.882302e+000	0	0	0	0	0	0	56.2874	1	1	54.4085	36.4545
DATA	1968	24	13	0	0	A_42_P537715	NM_001025743	756.042	343.859	1.283932e+003	1.284409e+002	1226	41	1.026624e+001	0	0	0	0	0	0	1180.7	1	1	46.8651	42.0645
DATA	1969	24	14	0	0	A_42_P453171	NM_001107063	781.271	343.7	1.169770e+003	1.170290e+002	1111.5	39	9.391542e+000	0	0	0	0	0	0	1079.09	1	1	46.8651	37.8571
DATA	1971	24	16	0	0	A_64_P096157	ENSRNOT00000059486	832.5	344	9.216622e+001	9.847129e+000	146.5	40	9.014181e+000	0	0	0	0	0	0	85.5348	1	1	65	40.2571
DATA	1972	24	17	0	0	A_43_P10076	NM_031665	857.347	344.12	1.186372e+004	1.186377e+003	10837	39	9.065447e+000	0	0	0	0	0	0	11039.7	1	1	48.8603	40.4815
DATA	1974	24	19	0	0	A_42_P772878	NM_001011936	908.208	344.194	1.879995e+003	1.880310e+002	1761	38	6.805746e+000	0	0	0	0	0	0	1758.13	1	1	47.5395	36.5455
DATA	1976	24	21	0	0	A_44_P447394	NM_019193	959.069	343.806	4.454601e+003	4.454733e+002	4073.5	41	8.822358e+000	0	0	0	0	0	0	4183.32	1	1	46.8651	40.4615
DATA	1977	24	22	0	0	A_42_P504250	NM_001134987	984.438	344.027	5.155253e+002	5.166583e+001	528	37	7.620822e+000	0	0	0	0	0	0	485.026	1	1	48.5334	38.6667
DATA	1978	24	23	0	0	A_42_P675802	NM_145777	1010.5	344	1.114247e+003	1.114770e+002	1078	39	9.907851e+000	0	0	0	0	0	0	1050.07	1	1	54.1152	41.2
DATA	1979	24	24	0	0	A_64_P111843	XM_001074913	1035.17	343.718	8.665492e+002	8.672197e+001	878	43	9.668582e+000	0	0	0	0	0	0	817.734	1	1	47.2035	43.4074
DATA	1980	24	25	0	0	A_44_P118724	NM_019361	1060.5	343.743	6.050189e+003	6.050285e+002	5553.5	40.5	9.685190e+000	0	0	0	0	0	0	5716.27	1	1	47.2035	42.3929
DATA	1981	24	26	0	0	A_43_P21749	NM_001108329	1086.5	344.352	2.934301e+001	4.492473e+000	92.5	39.5	9.409834e+000	0	0	0	0	0	0	27.7535	1	1	57.5363	40.7857
DATA	1982	24	27	0	0	A_43_P11879	NM_017250	1111.39	344.21	3.009586e+001	4.540113e+000	89.5	40	1.113317e+001	0	0	0	0	0	0	28.4867	1	1	44.0646	43.3243
DATA	1983	24	28	0	0	A_64_P023182	NM_001000033	1136.95	343.742	1.114639e+001	3.575706e+000	73	41	1.003455e+001	0	0	0	0	0	0	10.5558	1	0	45.1352	42.4054
DATA	1985	24	30	0	0	A_44_P368461	NM_001107085	1187.63	343.986	1.086989e+001	3.565691e+000	74	39.5	7.593503e+000	0	0	0	0	0	0	10.2987	1	0	47.2035	39.375
DATA	1986	24	31	0	0	A_64_P097257	A_64_P097257	1213.42	344.427	4.879649e+001	5.945199e+000	110	36	6.750119e+000	0	0	0	0	0	0	46.2286	1	1	57.5363	37.5556
DATA	1987	24	32	0	0	A_64_P100634	NM_001100171	1238.58	344.427	1.914607e+002	1.944516e+001	243.5	37	8.038864e+000	0	0	0	0	0	0	181.322	1	1	57.5363	36.96
DATA	1988	24	33	0	0	A_64_P041902	NM_001025653	1263.93	344.268	2.013637e+003	2.013924e+002	1935	38	8.005902e+000	0	0	0	0	0	0	1905.89	1	1	47.5395	38.5641
DATA	1990	24	35	0	0	A_64_P116171	NM_001004266	1315	344.455	7.154244e+001	7.923479e+000	134.5	37.5	7.342523e+000	0	0	0	0	0	0	67.5907	1	1	65	37.4667
DATA	1991	24	36	0	0	A_44_P243279	NM_001134780	1340.06	343.969	2.822607e+002	2.843130e+001	336.5	41	9.106211e+000	0	0	0	0	0	0	266.327	1	1	46.8651	41.6667
DATA	1992	24	37	0	0	A_64_P151468	XM_001062494	1365.75	344.159	1.634277e+001	3.785950e+000	79	39	5.630591e+000	0	0	0	0	0	0	15.3975	1	0	45.1352	38.6087
DATA	1993	24	38	0	0	A_64_P075769	ENSRNOT00000043984	1390.79	343.857	2.328356e+003	2.328607e+002	2231.5	40.5	6.172894e+000	0	0	0	0	0	0	2189.94	1	1	45.1352	41.7692
DATA	1994	24	39	0	0	A_42_P508921	NM_031703	1416.5	344.5	3.441003e+000	3.427297e+000	60	41	8.655410e+000	0	0	0	0	0	0	-5.72321	0	0	57.5363	41.871
DATA	1995	24	40	0	0	A_44_P503376	NM_001000274	1441.89	344.5	3.448343e+000	3.434608e+000	56.5	40.5	1.604701e+001	0	0	0	0	0	0	-8.36088	0	0	56.9804	46.6071
DATA	1996	24	41	0	0	A_64_P093088	NM_001000816	1467.5	344.5	9.942256e+000	3.583416e+000	74	39.5	9.057987e+000	0	0	0	0	0	0	9.29186	1	0	57.5363	39.4333
DATA	1997	24	42	0	0	A_44_P489608	NM_023967	1492.46	344.583	9.539580e+001	1.014472e+001	156.5	39	7.218298e+000	0	0	0	0	0	0	88.9331	1	1	48.2044	39.6563
DATA	1998	24	43	0	0	A_44_P213088	ENSRNOT00000037507	1517.96	344.26	2.681066e+001	4.377947e+000	89	40.5	9.334734e+000	0	0	0	0	0	0	24.9247	1	1	48.2044	39.1176
DATA	1999	24	44	0	0	A_64_P060725	NM_001025278	1543.5	344.5	3.485024e+000	3.471143e+000	61	37	8.210683e+000	0	0	0	0	0	0	-1.84932	0	0	57.5363	36.0625
DATA	2000	24	45	0	0	A_44_P384698	XM_216321	1568.52	344.328	1.571591e+003	1.571977e+002	1586	39	6.136617e+000	0	0	0	0	0	0	1452.25	1	1	46.5243	38.4839
DATA	2001	24	46	0	0	A_42_P696084	NM_031022	1594.42	344.573	1.347942e+003	1.348395e+002	1310.5	37	1.029006e+001	0	0	0	0	0	0	1241.41	1	1	57.5363	39.6087
DATA	2002	24	47	0	0	A_64_P014918	NM_001108246	1619.32	344.253	1.101072e+003	1.101630e+002	1046	39	8.814337e+000	0	0	0	0	0	0	1010.56	1	1	49.1849	39.2813
DATA	2003	24	48	0	0	A_64_P032690	ENSRNOT00000049975	1645.11	344.5	4.387845e+004	4.387847e+003	40487.5	40.5	8.112633e+000	0	0	0	0	0	0	40123.3	1	1	56.9804	40.5
DATA	2004	24	49	0	0	A_42_P481516	NM_134364	1669.95	344.534	4.034723e+003	4.034878e+002	3700	41	1.159000e+001	0	0	0	1	0	0	3675.71	1	1	48.5334	42.1463
DATA	2005	24	50	0	0	A_64_P166158	ENSRNOT00000013694	1695.58	344.573	9.268769e+001	9.923891e+000	148	42.5	8.653356e+000	0	0	0	0	0	0	84.1035	1	1	57.5363	41.7059
DATA	2006	24	51	0	0	A_64_P140338	A_64_P140338	1721.42	344.573	3.574993e+000	3.567945e+000	67	38.5	8.370064e+000	0	0	0	0	0	0	2.04605	0	0	57.5363	38.8333
DATA	2007	24	52	0	1	ERCC-00062_278	ERCC-00062_278	1746.37	344.529	2.663141e+002	2.687037e+001	307	39	9.053607e+000	0	0	0	0	0	0	239.643	1	1	46.5243	39.303
DATA	2008	24	53	0	0	A_64_P110838	NM_001013175	1772	344.545	1.637441e+002	1.676362e+001	210.5	44	8.503735e+000	0	0	0	0	0	0	146.699	1	1	55.8519	42.5938
DATA	2009	24	54	0	0	A_42_P802358	NM_001024341	1797.07	344.507	7.497497e+003	7.497584e+002	6572	40	8.947869e+000	0	0	0	0	0	0	6687.48	1	1	48.5334	40.0667
DATA	2010	24	55	0	0	A_64_P010421	A_64_P010421	1822.13	344.704	2.640453e+001	4.483435e+000	88	40.5	7.140228e+000	0	0	0	0	0	0	23.4466	1	1	41.4593	40.7188
DATA	2011	24	56	0	0	A_43_P13320	NM_138880	1848.03	344.563	6.150236e+000	3.692274e+000	71	39	7.907251e+000	0	0	0	0	0	0	5.43536	1	0	44.0646	39.2692
DATA	2012	24	57	0	0	A_42_P800916	NM_022403	1873.32	344.68	1.361177e+002	1.409467e+001	183	39.5	8.343131e+000	0	0	0	0	0	0	119.733	1	1	48.8603	39.2941
DATA	2013	24	58	0	0	A_42_P554610	XM_001064863	1898.65	344.88	6.879987e+003	6.880085e+002	5773	40.5	7.076702e+000	0	0	0	0	0	0	6023.21	1	1	48.8603	40.0833
DATA	2014	24	59	0	0	A_42_P476353	NM_001012113	1924.09	344.896	5.396334e+003	5.396460e+002	4530	37	8.862056e+000	0	0	0	0	0	0	4701.54	1	1	46.8651	37.7297
DATA	2015	24	60	0	0	A_43_P12234	NM_022516	1949.31	344.986	1.290966e+003	1.291499e+002	1145	36	7.224416e+000	0	0	0	0	0	0	1119.35	1	1	47.2035	36.5946
DATA	2016	24	61	0	0	A_64_P048315	ENSRNOT00000044039	1975.5	345	1.217018e+002	1.272881e+001	170	40	7.497089e+000	0	0	0	0	0	0	104.994	1	1	54.1152	39.7222
DATA	2017	24	62	0	0	A_44_P477047	NM_171983	2000.5	345	3.617045e+004	3.617047e+003	30372	40	7.381960e+000	0	0	0	0	0	0	31055.4	1	1	54.1152	40.92
DATA	2018	24	63	0	0	A_43_P11871	NM_017230	2026	345	3.769662e+001	5.328382e+000	96	41	7.446923e+000	0	0	0	0	0	0	32.2081	1	1	54.9904	39.96
DATA	2019	24	64	0	0	A_64_P060608	XM_001068783	2051.53	344.882	3.454261e+001	5.123681e+000	97	40	8.708970e+000	0	0	0	0	0	0	29.3698	1	1	46.8651	40.6154
DATA	2020	24	65	0	0	A_64_P115811	NM_001008516	2076.5	345	2.443954e+001	4.519747e+000	85	39	8.146448e+000	0	0	0	0	0	0	20.6824	1	1	54.1152	40.7308
DATA	2021	24	66	0	0	A_44_P131296	ENSRNOT00000039892	2102.39	345.069	3.530662e+001	5.201958e+000	95	40	9.371412e+000	0	0	0	0	0	0	29.7357	1	1	65	40.1481
DATA	2022	24	67	0	0	A_44_P668388	NM_001109245	2127.5	345	2.117372e+002	2.151873e+001	243	39.5	1.082732e+001	0	0	0	0	0	0	177.51	1	1	65	40.7353
DATA	2023	24	68	0	0	A_64_P069729	NM_019189	2152.91	345.065	6.592150e+001	7.636759e+000	120	35	1.240328e+001	0	0	0	0	0	0	55.0155	1	1	54.4085	38.7143
DATA	2024	24	69	1028	1	(+)E1A_r60_1	E1A_r60_1	2178.72	344.763	3.888330e+000	3.872843e+000	62	38	9.077945e+000	0	0	0	0	0	0	-2.64193	0	0	48.5334	40.3333
DATA	2025	24	70	0	0	A_64_P165441	NM_001109059	2203.83	345.017	2.256716e+001	4.496451e+000	85	37	9.386475e+000	0	0	0	0	0	0	18.67	1	1	44.0646	39.9655
DATA	2026	24	71	0	0	A_44_P1034910	NM_201562	2229.17	344.677	1.828952e+003	1.829368e+002	1573.5	39.5	8.308662e+000	0	0	0	0	0	0	1506.84	1	1	45.4864	39.2353
DATA	2027	24	72	0	0	A_42_P631818	NM_030854	2254.57	344.746	4.606302e+001	6.048956e+000	102	38	7.837305e+000	0	0	0	0	0	0	37.8016	1	1	46.5243	40.0294
DATA	2028	24	73	0	0	A_64_P095620	ENSRNOT00000031258	2279.91	345.386	3.879324e+001	5.525707e+000	95	38.5	8.172072e+000	0	0	0	0	0	0	31.7198	1	1	57.259	39.9
DATA	2029	24	74	0	0	A_42_P726573	NM_053838	2305.65	345.038	6.253982e+002	6.266439e+001	572	34.5	9.550892e+000	0	0	0	0	0	0	509.524	1	1	49.5074	38.2333
DATA	2030	24	75	0	0	A_64_P029142	NM_001107866	2330.58	345.427	3.916522e+001	5.570837e+000	94	42	1.102977e+001	0	0	0	0	0	0	31.8082	1	1	57.5363	41.5484
DATA	2031	24	76	0	0	A_43_P22902	NM_001106874	2355.33	345.304	3.989278e+000	3.973389e+000	58	42	9.463044e+000	0	0	0	0	0	0	-5.77241	0	0	46.8651	40.7778
DATA	2032	24	77	0	0	A_42_P619008	NM_001013079	2381.23	344.727	2.701361e+003	2.701655e+002	2217.5	42.5	5.702203e+000	0	0	0	0	0	0	2181.25	1	1	45.4864	41.5313
DATA	2033	24	78	0	0	A_64_P054421	A_64_P054421	2406.54	345	1.056906e+001	4.131577e+000	71	41.5	6.367445e+000	0	0	0	0	0	0	8.51407	1	0	45.835	41.3125
DATA	2034	24	79	0	0	A_42_P627330	NM_001106628	2432.1	345.125	4.932793e+002	4.949003e+001	459	42	9.833744e+000	0	0	0	0	0	0	396.554	1	1	46.8651	43.6571
DATA	2035	24	80	0	0	A_64_P049613	A_64_P049613	2457.43	345.125	2.460513e+001	4.703914e+000	80	40.5	6.112157e+000	0	0	0	0	0	0	19.747	1	1	47.8731	41.3929
DATA	2036	24	81	0	0	A_42_P708614	NM_001130505	2482.75	345.356	2.380421e+004	2.380424e+003	19102	39	6.098130e+000	0	0	0	1	0	0	19080.1	1	1	48.5334	40.4828
DATA	2037	24	82	0	0	A_42_P660068	NM_031350	2508.37	345.5	1.313003e+003	1.313618e+002	1123.5	40	7.029144e+000	0	0	0	0	0	0	1051.51	1	1	47.8731	39.1379
DATA	2038	24	83	66	1	DarkCorner	DarkCorner	2533.47	345.082	4.035742e+000	4.019667e+000	54	37.5	7.143331e+000	0	0	0	0	0	0	-7.48321	0	0	51.0895	39.375
DATA	2039	24	84	66	1	DarkCorner	DarkCorner	2559.33	345.5	4.035378e+000	4.019304e+000	56	37.5	8.063256e+000	0	0	0	0	0	0	-5.46273	0	0	57.5363	36.8667
DATA	2040	24	85	66	1	DarkCorner	DarkCorner	2584.53	344.926	4.033617e+000	4.017551e+000	56	35	7.765869e+000	0	0	0	0	0	0	-6.38618	0	0	46.8651	35.4072
DATA	2041	25	1	66	1	DarkCorner	DarkCorner	438.178	350.945	3.676447e+000	3.678331e+000	65	38	1.026961e+001	0	0	0	0	0	0	3.06045	0	0	46.8651	39.2677
DATA	2042	25	2	66	1	DarkCorner	DarkCorner	464.017	351.117	3.661849e+000	3.647264e+000	56	38	9.512754e+000	0	0	0	0	0	0	-4.33492	0	0	44.4243	37.2973
DATA	2043	25	3	0	0	A_64_P106975	A_64_P106975	489.638	350.87	1.797312e+002	1.833665e+001	219.5	36	7.591102e+000	0	0	0	0	0	0	159.172	1	1	46.8651	34.8205
DATA	2044	25	4	0	0	A_42_P799702	NM_145093	515.041	351.137	1.726685e+002	1.764198e+001	217	40.5	9.203786e+000	0	0	0	1	0	0	153.523	1	1	46.8651	39.75
DATA	2045	25	5	0	0	A_42_P704429	NM_053428	540.368	350.794	1.971481e+004	1.971485e+003	17373	37	1.009160e+001	0	0	0	0	0	0	17596.1	1	1	46.8651	38.0882
DATA	2046	25	6	0	0	A_64_P129730	NM_001033896	565.907	351.065	6.129311e+001	7.103642e+000	117	35	6.712936e+000	0	0	0	0	0	0	54.9225	1	1	54.4085	35.9688
DATA	2047	25	7	0	0	A_64_P156308	NM_001008284	591.243	351	3.492169e+002	3.510440e+001	377	37.5	6.648388e+000	0	0	0	0	0	0	314.118	1	1	46.8651	37.1429
DATA	2048	25	8	0	0	A_44_P152029	A_44_P152029	616.5	351	1.280027e+001	3.786493e+000	74	37	8.226674e+000	0	0	0	0	0	0	11.5572	1	0	54.1152	36.6667
DATA	2049	25	9	0	0	A_42_P751152	NM_001106360	642.093	351.065	2.728671e+004	2.728673e+003	24566	38	7.168795e+000	0	0	0	0	0	0	24729.8	1	1	54.4085	38.9655
DATA	2050	25	10	0	0	A_64_P010494	NM_001001421	667.309	351.088	8.457445e+001	9.167398e+000	139	35	5.684713e+000	0	0	0	0	0	0	76.9276	1	1	45.835	35.5143
DATA	2051	25	11	0	0	A_64_P054606	NM_001107279	692.937	350.825	2.544969e+002	2.569262e+001	299	36	6.027714e+000	0	0	0	0	0	0	232.309	1	1	45.4864	33.7778
DATA	2052	25	12	0	0	A_44_P335679	NM_001108168	718.418	351.427	1.691334e+001	3.898323e+000	77	36	7.736527e+000	0	0	0	0	0	0	15.4938	1	0	57.5363	34.5769
DATA	2053	25	13	0	0	A_64_P128766	NM_001034912	743.582	351.427	1.170388e+002	1.221621e+001	173	33	1.091286e+001	0	0	0	0	0	0	107.571	1	1	57.5363	37.0952
DATA	2054	25	14	0	0	A_42_P595591	NM_031011	768.632	350.735	1.035841e+004	1.035847e+003	9532	39.5	7.419828e+000	0	0	0	0	0	0	9549.79	1	1	46.5243	38.4231
DATA	2055	25	15	0	0	A_44_P962846	ENSRNOT00000058887	794.186	351.029	2.653894e+002	2.676600e+001	302	36	9.236887e+000	0	0	0	0	0	0	245.443	1	1	46.8651	38.4848
DATA	2056	25	16	0	0	A_64_P111878	XR_005569	819.377	350.77	1.757990e+003	1.758332e+002	1731.5	36	9.047845e+000	0	0	0	0	0	0	1630.55	1	1	43.7019	37.2778
DATA	2057	25	17	0	0	A_64_P149225	NM_001100833	845.418	351.427	9.183959e+004	9.183959e+003	85575	40	8.945751e+000	0	0	0	0	0	0	85433.1	1	1	57.5363	40.7857
DATA	2058	25	18	0	0	A_64_P032361	ENSRNOT00000061428	870.181	351.653	9.457434e+002	9.463724e+001	918	37	8.067965e+000	0	0	0	0	0	0	882.049	1	1	47.5395	37.2222
DATA	2059	25	19	0	0	A_64_P038843	A_64_P038843	896	351.455	1.775274e+001	3.872265e+000	81	36	7.694527e+000	0	0	0	0	0	0	16.5981	1	1	55.8519	37.3667
DATA	2060	25	20	1028	1	(+)E1A_r60_a97	E1A_r60_a97	921.418	351.427	3.447255e+000	3.433524e+000	61	34	5.970096e+000	0	0	0	0	0	0	-1.86841	0	0	65	35.7273
DATA	2061	25	21	0	0	A_42_P586883	NM_001106416	946.917	351.208	3.458872e+001	4.868684e+000	94	37.5	8.187857e+000	0	0	0	0	0	0	32.48	1	1	47.2035	39.3214
DATA	2062	25	22	0	0	A_42_P626023	NM_001107265	972.333	351.5	2.650939e+002	2.672906e+001	312	37	8.185283e+000	0	0	0	0	0	0	249.414	1	1	57.5363	38.3667
DATA	2063	25	23	0	0	A_64_P304646	ENSRNOT00000046873	996.571	351.161	4.748113e+001	5.848277e+000	105	39.5	9.421975e+000	0	0	0	0	0	0	44.7439	1	1	42.9674	39.8824
DATA	2064	25	24	0	0	A_42_P540711	NM_133568	1022.42	350.901	1.342545e+004	1.342549e+003	12649	43.5	1.037896e+001	0	0	0	0	0	0	12670.6	1	1	47.8731	43.625
DATA	2065	25	25	0	0	A_64_P079149	XM_001063529	1048.17	350.677	6.446713e+002	6.455698e+001	687	41	9.906091e+000	0	0	0	0	0	0	609.21	1	1	45.4864	41.6216
DATA	2066	25	26	0	0	A_42_P507072	FQ213070	1073.37	351.057	2.189148e+003	2.189412e+002	2062	40	8.469883e+000	0	0	0	0	0	0	2071.05	1	1	46.8651	41.1034
DATA	2067	25	27	0	0	A_44_P314270	ENSRNOT00000015469	1098.77	351.116	1.325441e+002	1.368305e+001	188.5	46	1.157434e+001	0	0	0	0	0	0	125.504	1	1	46.5243	46.1818
DATA	2068	25	28	0	0	A_64_P026098	ENSRNOT00000027092	1124.5	351.5	5.994365e+001	6.889308e+000	121.5	36	1.054984e+001	0	0	0	0	0	0	56.7997	1	1	57.5363	39.2286
DATA	2069	25	29	0	0	A_64_P018599	XM_229548	1149.89	351.5	3.407717e+000	3.394144e+000	59.5	39	8.012003e+000	0	0	0	0	0	0	-3.57773	0	0	65	38.4054
DATA	2070	25	30	0	0	A_43_P15907	NM_001134567	1175.42	351.573	2.886908e+001	4.455276e+000	92	37	6.647184e+000	0	0	0	0	0	0	27.3726	1	1	57.5363	36.7667
DATA	2071	25	31	0	0	A_64_P151804	A_64_P151804	1200.57	351.127	4.761128e+001	5.846796e+000	109	38	8.627330e+000	0	0	0	0	0	0	45.1405	1	1	44.4243	39.3913
DATA	2072	25	32	0	0	A_42_P642743	NM_017005	1225.87	351.243	6.172892e+003	6.172985e+002	5766	38	6.385058e+000	0	0	0	0	0	0	5851.22	1	1	46.5243	37.7
DATA	2073	25	33	0	0	A_42_P630463	NM_022238	1251.12	351.418	1.708547e+002	1.741969e+001	221	35	9.066672e+000	0	0	0	0	0	0	161.879	1	1	46.1809	36.7273
DATA	2074	25	34	0	0	A_64_P119533	NM_001000351	1276.89	351.5	8.082748e+000	3.493079e+000	70.5	37	8.452059e+000	0	0	0	0	0	0	7.6528	1	0	65	38.6389
DATA	2075	25	35	0	0	A_64_P158068	FQ219182	1302.06	351.611	1.930546e+003	1.930846e+002	1869	35	6.473703e+000	0	0	0	0	0	0	1826.21	1	1	48.2044	35.7037
DATA	2076	25	36	0	0	A_64_P000779	XM_225838	1327.5	351.258	3.161221e+001	4.646484e+000	93	42	9.029645e+000	0	0	0	0	0	0	29.8684	1	1	46.5243	43.0345
DATA	2077	25	37	0	0	A_44_P630082	ENSRNOT00000020640	1352.89	351.106	1.456360e+002	1.495751e+001	201	40	8.240704e+000	0	0	0	0	0	0	137.412	1	1	46.1809	40.2333
DATA	2078	25	38	0	0	A_42_P717654	XM_001063683	1378.2	351.357	2.846331e+003	2.846536e+002	2603	39.5	8.606616e+000	0	0	0	0	0	0	2681.42	1	1	47.5395	39.9231
DATA	2079	25	39	0	0	A_42_P792382	NM_017257	1403.5	351.5	2.746130e+003	2.746343e+002	2606	39	7.142825e+000	0	0	0	0	0	0	2582.41	1	1	49.1849	40.5926
DATA	2080	25	40	0	0	A_64_P075035	NM_001001014	1429.42	351.573	1.219360e+002	1.266644e+001	180	41	9.713199e+000	0	0	0	0	0	0	114.431	1	1	57.5363	43.7097
DATA	2081	25	41	0	0	A_64_P021281	NM_001039022	1454.32	351.382	3.329109e+003	3.329286e+002	3104	39	1.410462e+001	0	0	0	0	0	0	3117.3	1	1	46.5243	43.375
DATA	2082	25	42	0	0	A_44_P729533	TC581820	1479.54	351.614	4.079620e+003	4.079766e+002	3861.5	40	8.918597e+000	0	0	0	0	0	0	3810.9	1	1	47.5395	37.9
DATA	2083	25	43	0	0	A_42_P802358	NM_001024341	1505.11	351.648	7.533619e+003	7.533698e+002	7070	36	7.758363e+000	0	0	0	0	0	0	7018.71	1	1	47.8731	37.5946
DATA	2084	25	44	0	0	A_42_P481087	XM_232226	1530.48	351.849	5.562157e+002	5.572929e+001	568.5	41	8.266512e+000	0	0	0	0	0	0	516.741	1	1	47.8731	38.0909
DATA	2085	25	45	0	0	A_42_P561597	NM_001106486	1555.86	351.538	4.701236e+003	4.701365e+002	4265.5	39	6.025027e+000	0	0	0	0	0	0	4354.24	1	1	44.7812	37.7436
DATA	2086	25	46	0	0	A_64_P113381	A_64_P113381	1581.5	352	4.866767e+000	3.518877e+000	68	38.5	9.844831e+000	0	0	0	0	0	0	4.49315	1	0	65	40.9
DATA	2087	25	47	0	0	A_64_P088695	NM_001134414	1606.42	351.507	1.220999e+003	1.221499e+002	1113.5	37.5	9.732499e+000	0	0	0	0	0	0	1123.46	1	1	47.8731	40.8077
DATA	2088	25	48	0	0	A_44_P728586	ENSRNOT00000013367	1632.24	351.597	8.781709e+002	8.788719e+001	875.5	38	9.830936e+000	0	0	0	0	0	0	805.102	1	1	46.1809	39.7742
DATA	2089	25	49	0	0	A_42_P544898	NM_001108279	1657.36	351.855	3.868351e+001	5.231774e+000	101	38	9.796153e+000	0	0	0	0	0	0	35.3352	1	1	46.8651	39.2692
DATA	2090	25	50	0	0	A_44_P432910	NM_012814	1683.5	352	1.040865e+005	1.040865e+004	93650	41	9.351222e+000	0	0	0	0	0	0	94699.2	1	1	54.1152	40.2308
DATA	2091	25	51	0	0	A_64_P157820	XM_001079095	1708.31	352.123	7.057832e+001	7.900507e+000	130.5	41	8.345120e+000	0	0	0	0	0	0	63.9617	1	1	45.4864	40.4444
DATA	2092	25	52	0	0	A_42_P601802	NM_134465	1733.44	351.973	2.054079e+003	2.054388e+002	1839	39	7.974413e+000	0	0	0	0	0	0	1853.83	1	1	48.5334	38.5357
DATA	2093	25	53	0	0	A_64_P039737	NM_001130508	1758.91	351.896	1.310858e+002	1.358877e+001	184	40	7.902940e+000	0	0	0	0	0	0	117.798	1	1	46.8651	40.6486
DATA	2094	25	54	0	0	A_42_P648800	AA998304	1784.29	351.868	2.008621e+002	2.040561e+001	247	45	8.637186e+000	0	0	0	0	0	0	179.709	1	1	45.835	43.3793
DATA	2095	25	55	0	0	A_64_P007009	ENSRNOT00000014567	1809.88	352	2.062821e+003	2.063137e+002	1888	39	7.040752e+000	0	0	0	0	0	0	1837.25	1	1	49.8279	40.0588
DATA	2096	25	56	0	0	A_64_P049527	TC606896	1835.5	352	3.582928e+002	3.601263e+001	377	42	1.846770e+001	0	0	0	0	0	0	317.636	1	1	54.1152	48.4516
DATA	2097	25	57	0	0	A_44_P281595	NM_001037556	1860.23	351.884	5.876891e+001	6.915983e+000	118	41	7.583535e+000	0	0	0	0	0	0	51.8629	1	1	46.5243	41.48
DATA	2098	25	58	0	0	A_44_P374638	NM_024391	1886.42	352.427	1.081654e+002	1.142014e+001	159	43	9.967487e+000	0	0	0	0	0	0	94.995	1	1	57.5363	41.4375
DATA	2100	25	60	0	0	A_64_P046416	A_64_P046416	1937.09	352.386	5.373663e+001	6.523701e+000	113	38	7.146722e+000	0	0	0	0	0	0	46.7422	1	1	57.259	38.4286
DATA	2101	25	61	0	0	A_44_P428560	NM_001001358	1962.6	352.192	5.691741e+001	6.798029e+000	113	41.5	8.185000e+000	0	0	0	0	0	0	49.2668	1	1	48.2044	41.075
DATA	2102	25	62	0	0	A_44_P208887	NM_001105774	1987.86	352.407	4.827339e+001	6.103621e+000	105	40	1.099316e+001	0	0	0	0	0	0	41.5839	1	1	65	43.129
DATA	2103	25	63	0	0	A_42_P533792	NM_001106575	2012.91	351.818	5.798883e+003	5.799004e+002	4904.5	41	8.445906e+000	0	0	0	0	0	0	4971.06	1	1	45.835	43
DATA	2104	25	64	0	0	A_42_P802550	NM_017365	2038.26	351.812	2.085929e+002	2.119751e+001	241	42.5	9.956719e+000	0	0	0	0	0	0	177.953	1	1	46.5243	43.1071
DATA	2105	25	65	0	0	A_42_P545129	ENSRNOT00000007554	2063.68	352.243	6.696782e+002	6.707495e+001	615.5	39.5	8.958022e+000	0	0	0	0	0	0	568.601	1	1	48.8603	42.3846
DATA	2106	25	66	0	0	A_42_P500675	NM_013179	2089.37	352.36	3.428075e+002	3.449156e+001	357	39	7.253045e+000	0	0	0	0	0	0	289.676	1	1	48.8603	40.24
DATA	2107	25	67	0	0	A_44_P127238	NM_001127655	2114.31	352.465	3.832609e+002	3.851650e+001	376	41	9.128772e+000	0	0	0	0	0	0	322.381	1	1	47.8731	40.9
DATA	2108	25	68	0	0	A_64_P042142	ENSRNOT00000027371	2140.29	352.444	7.568796e+001	8.488584e+000	126	37	8.066634e+000	0	0	0	0	0	0	63.3674	1	1	48.5334	38.6
DATA	2109	25	69	0	0	A_44_P279756	NM_022848	2165.32	351.531	3.875959e+000	3.866927e+000	66	40	1.275984e+001	0	0	0	0	0	0	1.85428	0	0	49.8279	43.3438
DATA	2110	25	70	0	0	A_64_P119597	NM_001106871	2191	352.455	4.062719e+000	3.898265e+000	69	38.5	8.623836e+000	0	0	0	0	0	0	3.37161	1	0	55.8519	41.1842
DATA	2111	25	71	0	0	A_44_P790674	NM_001191933	2216.01	352.118	1.000247e+001	4.019688e+000	71	41	8.787854e+000	0	0	0	0	0	0	8.26638	1	0	46.8651	40.5294
DATA	2112	25	72	0	0	A_44_P405618	ENSRNOT00000025426	2241.56	351.972	2.019490e+002	2.056977e+001	224.5	36	7.053868e+000	0	0	0	0	0	0	166.22	1	1	48.2044	37.7188
DATA	2113	25	73	0	0	A_42_P719478	NM_001191779	2267.33	352.5	1.016181e+001	4.053500e+000	71	39	7.460933e+000	0	0	0	0	0	0	8.33213	1	0	57.5363	40.3
DATA	2114	25	74	0	0	A_64_P061424	A_64_P061424	2292.5	352.5	2.557847e+001	4.695914e+000	85.5	39	9.892028e+000	0	0	0	0	0	0	20.8979	1	1	57.5363	40.931
DATA	2115	25	75	0	0	A_44_P1042876	NM_212504	2317.96	352.727	8.570404e+002	8.579508e+001	753	41.5	8.763802e+000	0	0	0	1	0	0	697.863	1	1	49.1849	40.2857
DATA	2116	25	76	0	0	A_44_P470043	NM_001108103	2343.5	352.5	1.508604e+002	1.559813e+001	184	44	1.096327e+001	0	0	0	0	0	0	122.452	1	1	57.5363	44.12
DATA	2117	25	77	0	0	A_64_P108484	ENSRNOT00000046584	2368.77	352.403	3.733587e+001	5.453666e+000	97	40	8.686705e+000	0	0	0	0	0	0	30.219	1	1	43.7019	39.5897
DATA	2118	25	78	0	0	A_42_P666065	NM_001014069	2393.93	352.493	4.560099e+002	4.577481e+001	419	41	6.062141e+000	0	0	0	0	0	0	368.161	1	1	48.5334	39.9118
DATA	2119	25	79	0	0	A_64_P136571	NM_001134545	2419.55	352.358	3.946904e+001	5.615354e+000	94	42	9.214407e+000	0	0	0	0	0	0	31.7936	1	1	46.1809	42.0303
DATA	2120	25	80	0	0	A_42_P816740	NM_001108705	2444.75	352.627	1.891570e+002	1.933432e+001	213	41	7.479264e+000	0	0	0	0	0	0	152.096	1	1	49.1849	41.4242
DATA	2121	25	81	0	0	A_64_P018142	NM_001100716	2470.42	352.573	1.584514e+002	1.634409e+001	192	41	6.154006e+000	0	0	0	0	0	0	127.214	1	1	57.5363	40.7778
DATA	2122	25	82	0	0	A_42_P779687	ENSRNOT00000034449	2495.56	352.397	6.638951e+003	6.639072e+002	4997	38	8.112358e+000	0	0	0	0	0	0	5324.28	1	1	50.1463	39.8966
DATA	2124	25	84	66	1	DarkCorner	DarkCorner	2546.51	352.292	4.031565e+000	4.015508e+000	53	39	8.616785e+000	0	0	0	0	0	0	-8.51614	0	0	47.8731	39.4063
DATA	2125	25	85	66	1	DarkCorner	DarkCorner	2572	352.545	4.030264e+000	4.014211e+000	57	39	6.913337e+000	0	0	0	0	0	0	-5.14645	0	0	55.8519	38.725
DATA	2126	26	1	66	1	DarkCorner	DarkCorner	451.582	358.427	3.663491e+000	3.648899e+000	55	38	1.015064e+001	0	0	0	0	0	0	-5.52604	0	0	57.5363	39.3333
DATA	2127	26	2	66	1	DarkCorner	DarkCorner	476.4	358.429	3.649745e+000	3.635208e+000	57	34.5	8.246644e+000	0	0	0	0	0	0	-4.85032	0	0	47.8731	34.5882
DATA	2128	26	3	0	0	A_42_P713844	NM_001106167	502.253	358.373	4.317314e+002	4.332472e+001	454.5	39.5	4.171884e+000	0	0	0	0	0	0	383.626	1	1	49.1849	39.7308
DATA	2129	26	4	0	0	A_42_P627219	NM_001012468	527.378	358.5	5.760166e+003	5.760279e+002	5096	37	1.018672e+001	0	0	0	0	0	0	5138.08	1	1	48.5334	37.6667
DATA	2130	26	5	0	0	A_42_P461003	NM_001044283	553.029	358.147	7.486122e+003	7.486208e+002	6782.5	34	8.739479e+000	0	0	0	0	0	0	6703.25	1	1	46.8651	35.3871
DATA	2131	26	6	0	0	A_44_P1019923	NM_022522	578.181	358.361	1.352649e+003	1.353123e+002	1213	35	7.049294e+000	0	0	0	0	0	0	1215.83	1	1	47.8731	35.7188
DATA	2132	26	7	0	0	A_42_P814056	NM_001108866	603.779	358.273	5.151621e+003	5.151745e+002	4582.5	39	7.697228e+000	0	0	0	0	0	0	4648.17	1	1	49.8279	37.2258
DATA	2133	26	8	0	0	A_42_P795269	NM_001134730	629.181	358.361	4.070763e+003	4.070918e+002	3721	37	9.438995e+000	0	0	0	0	0	0	3686.7	1	1	47.8731	35.8065
DATA	2134	26	9	0	0	A_42_P763522	NM_001013980	654.333	358.453	1.511204e+003	1.511618e+002	1419	36	6.358287e+000	0	0	0	0	0	0	1373.61	1	1	49.1849	36.2353
DATA	2135	26	10	0	0	A_44_P292437	NM_153309	679.934	358.447	1.813266e+002	1.847251e+001	227	35.5	6.475350e+000	0	0	0	0	0	0	165.411	1	1	49.1849	35.1111
DATA	2136	26	11	0	0	A_64_P065313	ENSRNOT00000042070	705.514	358.557	9.092152e+001	9.747842e+000	143.5	34.5	6.438480e+000	0	0	0	0	1	0	83.2334	1	1	47.5395	31.8333
DATA	2137	26	12	0	0	A_64_P008047	NM_001033670	730.688	358.532	1.657558e+004	1.657561e+003	15245	37.5	8.538682e+000	0	0	0	0	0	0	15224.7	1	1	49.8279	37.3636
DATA	2138	26	13	0	0	A_64_P080612	TC638889	755.928	358.348	3.245230e+003	3.245418e+002	3028	38	6.332659e+000	0	0	0	0	0	0	2990.33	1	1	46.5243	36.4444
DATA	2139	26	14	0	0	A_43_P17696	NM_001004257	781.214	358.243	1.461674e+003	1.462088e+002	1383.5	37.5	8.849416e+000	0	0	0	0	0	0	1351.04	1	1	46.8651	37.3571
DATA	2140	26	15	0	0	A_64_P019608	NM_001105713	806.744	358.5	4.579065e+002	4.592197e+001	483	35	7.427182e+000	0	0	0	0	0	0	424.538	1	1	50.4627	35.6857
DATA	2141	26	16	0	0	A_64_P108575	ENSRNOT00000046600	832.5	358.5	5.528191e+001	6.521922e+000	117.5	39	7.821647e+000	0	0	0	0	0	0	51.4012	1	1	57.5363	38.8333
DATA	2142	26	17	0	0	A_64_P136859	NM_001109642	857.403	358.701	5.315990e+003	5.316102e+002	4989	39	9.341232e+000	0	0	0	0	0	0	4955.98	1	1	49.8279	39.4828
DATA	2143	26	18	0	0	A_64_P021597	A_64_P021597	883.049	358.395	6.058067e+000	3.495495e+000	67	35.5	7.899999e+000	0	0	0	0	0	0	5.66198	1	0	50.7771	36.8824
DATA	2144	26	19	0	0	A_64_P148032	A_64_P148032	908.5	358.564	9.494625e+001	1.009669e+001	151	34	5.847180e+000	0	0	0	0	0	0	88.9494	1	1	49.8279	34.4375
DATA	2145	26	20	0	0	A_42_P743580	NM_017214	933.646	358.835	3.110402e+003	3.110591e+002	2882.5	38	6.170844e+000	0	0	0	0	0	0	2920.31	1	1	50.1463	37.7
DATA	2146	26	21	0	0	A_42_P693964	NM_181087	959	358.5	1.191149e+003	1.191640e+002	1160	41.5	8.253054e+000	0	0	0	0	0	0	1120.52	1	1	48.5334	40.875
DATA	2147	26	22	0	0	A_44_P1058389	NM_012992	984.506	358.636	1.025701e+004	1.025707e+003	9562	42	9.812747e+000	0	0	0	0	0	0	9666.38	1	1	49.8279	40.96
DATA	2148	26	23	0	0	A_44_P135224	NM_022187	1010.42	358.573	6.830991e+001	7.634198e+000	128	39	1.055918e+001	0	0	0	0	0	0	64.4805	1	1	65	40.0606
DATA	2149	26	24	0	0	A_64_P070249	ENSRNOT00000048236	1035.22	358.541	6.027738e+002	6.037342e+001	632.5	42.5	9.746761e+000	0	0	0	0	0	0	569.752	1	1	48.8603	42.025
DATA	2150	26	25	0	0	A_42_P806899	NM_001108829	1061.09	358.614	2.903163e+001	4.470741e+000	93	40.5	7.078507e+000	0	0	0	0	0	0	27.4744	1	1	65	40.0526
DATA	2151	26	26	0	0	A_42_P465144	NM_001107714	1086.9	358.406	2.456024e+001	4.191553e+000	87	41	1.077972e+001	0	0	0	0	0	0	23.2651	1	1	47.2035	43.9333
DATA	2152	26	27	0	0	A_43_P19712	NM_001106751	1111.61	358.931	2.402975e+001	4.158514e+000	85	40.5	9.314422e+000	0	0	0	0	0	0	22.7805	1	1	53.8203	41.9615
DATA	2153	26	28	0	0	A_42_P728472	NM_001007600	1136.79	358.806	8.492843e+003	8.492911e+002	7952	38	1.005848e+001	0	0	0	0	0	0	8055.48	1	1	47.5395	40.6571
DATA	2154	26	29	66	-1	(-)3xSLv1	NegativeControl	1162.5	359	3.404620e+000	3.391059e+000	57	37	7.209658e+000	0	0	0	0	0	0	-5.92671	0	0	54.1152	36.6667
DATA	2155	26	30	0	0	A_42_P629394	NM_031683	1187.79	358.806	1.371276e+003	1.371696e+002	1368.5	38.5	7.843290e+000	0	0	0	0	0	0	1301.19	1	1	47.5395	38.9643
DATA	2156	26	31	0	0	A_64_P041977	A_64_P041977	1213.66	358.808	5.625447e+001	6.568603e+000	115.5	38	5.851496e+000	0	0	0	0	0	0	53.3718	1	1	48.2044	38.36
DATA	2157	26	32	0	0	A_44_P126406	XM_228958	1238.57	358.897	3.651393e+003	3.651551e+002	3560	37	9.970906e+000	0	0	0	0	0	0	3463.08	1	1	46.5243	37.6522
DATA	2158	26	33	0	0	A_64_P021878	NM_001167664	1263.93	359	4.229111e+001	5.422863e+000	101.5	37	7.886647e+000	0	0	0	0	0	0	40.0871	1	1	46.8651	37.4722
DATA	2159	26	34	0	0	A_64_P058719	NM_001014175	1289.37	358.866	3.873250e+003	3.873399e+002	3622	38	6.138990e+000	0	0	0	0	0	0	3668.36	1	1	45.835	37.4828
DATA	2160	26	35	0	0	A_42_P495579	NM_001107564	1314.87	358.922	2.169852e+002	2.196340e+001	258.5	39	9.898316e+000	0	0	0	0	0	0	205.295	1	1	48.2044	39.68
DATA	2161	26	36	0	0	A_64_P054979	NM_001109615	1340.26	358.884	5.437594e+001	6.415738e+000	114	41	5.258480e+000	0	0	0	0	0	0	51.3814	1	1	46.1809	40.5806
DATA	2162	26	37	0	0	A_44_P713838	ENSRNOT00000032874	1365.5	358.79	7.352408e+001	8.104724e+000	133	37	6.702510e+000	0	0	0	0	0	0	69.3722	1	1	42.9674	38.069
DATA	2163	26	38	0	0	A_64_P158913	NM_001108101	1391.14	358.714	7.487066e+000	3.497050e+000	70.5	37	7.882062e+000	0	0	0	0	0	0	7.05211	1	0	44.7812	39.5758
DATA	2164	26	39	0	0	A_43_P13018	NM_054004	1416.17	358.677	7.946021e+003	7.946095e+002	7265	40	1.254165e+001	0	0	0	0	0	0	7470.26	1	1	45.4864	42.6897
DATA	2165	26	40	0	0	A_64_P114383	A_64_P114383	1441.73	358.643	1.096305e+004	1.096311e+003	10339	41	9.347758e+000	0	0	0	0	0	0	10284.6	1	1	46.8651	42.2059
DATA	2166	26	41	0	0	A_43_P16629	XM_001080634	1466.94	358.768	4.662643e+003	4.662769e+002	4261	40	9.526732e+000	0	0	0	0	0	0	4364	1	1	46.5243	39.5172
DATA	2167	26	42	0	0	A_42_P810313	NM_001108677	1492.34	358.973	6.003039e+001	6.921989e+000	121	39.5	7.350652e+000	0	0	0	0	0	0	56.0441	1	1	49.1849	38.7059
DATA	2168	26	43	0	0	A_42_P537516	NM_001106023	1517.66	359.122	6.707242e+003	6.707331e+002	6135	39	7.785892e+000	0	0	0	0	0	0	6244.87	1	1	48.8603	39.8649
DATA	2169	26	44	0	0	A_64_P006964	A_64_P006964	1543.03	359.081	9.751492e+001	1.034911e+001	156	40	7.151780e+000	0	0	0	0	0	0	90.5266	1	1	45.1352	39.0588
DATA	2170	26	45	0	0	A_42_P829251	NM_133381	1568.86	359.407	3.490701e+000	3.489080e+000	66	38	8.615796e+000	0	0	0	0	0	0	2.70693	0	0	56.9804	38.6571
DATA	2171	26	46	0	0	A_42_P687443	NM_020100	1594.42	359.427	7.370647e+001	8.154458e+000	131.5	39	1.231638e+001	0	0	0	0	0	0	67.9835	1	1	65	43.12
DATA	2172	26	47	0	0	A_44_P196146	NM_031349	1619.31	359.346	8.531840e+001	9.221955e+000	141	39	1.004549e+001	0	0	0	0	0	0	78.4254	1	1	50.4627	40.3871
DATA	2173	26	48	0	0	A_64_P050137	ENSRNOT00000058586	1645.14	358.957	1.419068e+002	1.461916e+001	192	45	9.349347e+000	0	0	0	0	0	0	129.954	1	1	46.8651	43.4063
DATA	2174	26	49	0	0	A_44_P637827	NM_001108797	1669.96	359.139	2.898907e+003	2.899122e+002	2552	38	8.403778e+000	0	0	0	0	0	0	2644.95	1	1	46.8651	38.4615
DATA	2175	26	50	0	0	A_64_P070073	NM_001109590	1695.67	359.5	9.897330e+001	1.051151e+001	145	41.5	8.615206e+000	0	0	0	0	0	0	89.946	1	1	57.5363	40.8125
DATA	2176	26	51	0	0	A_64_P130572	NM_001109400	1720.97	359.247	6.346913e+002	6.356861e+001	646.5	38.5	8.496109e+000	0	0	0	0	0	0	574.441	1	1	47.5395	38.9643
DATA	2177	26	52	0	0	A_42_P658815	NM_198745	1746.26	359.527	1.214602e+003	1.215127e+002	1161	38	7.424169e+000	0	0	0	0	0	0	1094.73	1	1	49.1849	38.4194
DATA	2179	26	54	0	0	A_43_P14809	TC581403	1797.13	359.042	6.472794e+002	6.482806e+001	640	42	8.108637e+000	0	0	0	0	0	0	578.256	1	1	46.8651	41
DATA	2180	26	55	0	0	A_42_P553319	TC597248	1822.43	359.373	6.126263e+001	7.114730e+000	118.5	37.5	7.843037e+000	0	0	0	0	0	0	54.4847	1	1	49.1849	38.4286
DATA	2181	26	56	0	0	A_64_P004162	NM_019139	1848.33	359.5	3.649380e+000	3.651267e+000	69	37	9.200752e+000	0	0	0	0	0	0	3.06199	0	0	57.5363	39.5769
DATA	2182	26	57	0	0	A_64_P032450	NM_172330	1873.54	359.754	1.799606e+002	1.836283e+001	228	41	9.526379e+000	0	0	0	0	0	0	158.562	1	1	46.8651	41.5758
DATA	2183	26	58	0	0	A_44_P470976	NM_001013133	1898.62	359.554	4.305657e+001	5.656896e+000	101	40	9.519619e+000	0	0	0	0	0	0	37.758	1	1	49.1849	41.8621
DATA	2184	26	59	0	0	A_64_P166428	NM_001037205	1924.16	359.671	1.076793e+002	1.138158e+001	159	41	9.125021e+000	0	0	0	0	0	0	93.9741	1	1	48.2044	40.8621
DATA	2185	26	60	0	0	A_43_P11576	NM_012821	1949.67	359.5	1.163880e+001	3.883303e+000	74.5	38	6.179745e+000	0	0	0	0	0	0	10.108	1	0	57.5363	38.5484
DATA	2186	26	61	0	0	A_64_P156910	A_64_P156910	1975.33	359.5	1.243545e+002	1.298080e+001	171	46	1.065035e+001	0	0	0	0	0	0	107.47	1	1	57.5363	47.4667
DATA	2187	26	62	0	0	A_64_P126140	NM_001191648	2000.58	359.573	8.456913e+001	9.247399e+000	137	41	7.933487e+000	0	0	0	0	0	0	72.7354	1	1	57.5363	41.375
DATA	2188	26	63	0	0	A_42_P637122	NM_001108351	2025.5	359.5	3.278770e+003	3.278985e+002	2706	41	8.870427e+000	0	0	0	0	0	0	2806.58	1	1	50.4627	43.6563
DATA	2189	26	64	0	0	A_64_P081208	NM_001009712	2050.95	359.466	6.712752e+003	6.712858e+002	5700	41	1.026758e+001	0	0	0	0	0	0	5718.36	1	1	48.5334	43.3571
DATA	2190	26	65	0	0	A_42_P465608	NM_130894	2076.38	359.763	2.063986e+003	2.064335e+002	1800	40	7.520532e+000	0	0	0	0	0	0	1749.93	1	1	49.1849	40.5926
DATA	2191	26	66	0	0	A_42_P485589	NM_017246	2101.94	359.536	1.243714e+002	1.300853e+001	169.5	39	7.287196e+000	0	0	0	0	0	0	104.946	1	1	47.5395	40.3548
DATA	2192	26	67	0	0	A_64_P031383	NM_020308	2127.31	359.662	3.179767e+002	3.202758e+001	327	40.5	7.248426e+000	0	0	0	0	0	0	267.083	1	1	48.5334	39.5556
DATA	2193	26	68	0	0	A_44_P220647	NM_001107097	2153	359.545	8.901695e+001	9.697884e+000	138	41	1.156372e+001	0	0	0	0	0	0	74.4275	1	1	55.8519	41.6429
DATA	2194	26	69	0	0	A_44_P294687	NM_080885	2178.11	359.648	2.712620e+002	2.740015e+001	292	41	1.141031e+001	0	0	0	1	0	0	225.823	1	1	47.8731	42.8378
DATA	2195	26	70	0	0	A_42_P512838	NM_001106884	2203.37	359.48	5.910920e+002	5.923650e+001	546	37	7.402557e+000	0	0	0	0	0	0	489.987	1	1	49.8279	39.2581
DATA	2196	26	71	0	0	A_42_P635228	NM_001107651	2228.97	359.371	5.692397e+001	6.898858e+000	111.5	38	8.865664e+000	0	0	0	0	0	0	46.9921	1	1	44.0646	39.4
DATA	2197	26	72	0	0	A_44_P254687	NM_001105728	2254.57	359.64	1.191723e+002	1.254314e+001	162	40.5	7.156783e+000	0	0	0	0	0	0	97.9953	1	1	49.1849	41.4333
DATA	2198	26	73	0	0	A_64_P049628	NM_001169145	2279.62	359.57	3.665241e+003	3.665452e+002	2983	39	8.647580e+000	0	0	0	0	0	0	3002.87	1	1	50.4627	39.7742
DATA	2199	26	74	0	0	A_64_P007703	NM_031674	2305.5	360	7.129520e+001	8.146256e+000	121.5	39.5	1.078292e+001	0	0	0	0	0	0	58.207	1	1	54.1152	41.7333
DATA	2200	26	75	0	0	A_42_P645376	NM_001014135	2330.69	359.977	2.014874e+004	2.014878e+003	16263	45.5	1.014669e+001	0	0	0	0	0	0	16397	1	1	50.7771	44.6538
DATA	2201	26	76	0	0	A_64_P040920	XM_577408	2355.7	359.9	2.428497e+003	2.428821e+002	2016.5	39.5	1.141364e+001	0	0	0	0	0	0	1970.49	1	1	47.2035	40.9333
DATA	2202	26	77	0	0	A_42_P819656	NM_130409	2381.43	359.823	1.860944e+003	1.861368e+002	1577.5	38.5	7.502406e+000	0	0	0	0	0	0	1505.84	1	1	49.5074	38.3235
DATA	2203	26	78	0	0	A_64_P018921	NM_001135012	2406.78	359.89	2.606144e+002	2.636444e+001	265	39	7.456252e+000	0	0	0	0	0	0	210.388	1	1	47.8731	38.9355
DATA	2204	26	79	0	0	A_43_P15253	NM_012967	2432.09	359.896	1.014149e+002	1.089952e+001	143	45	7.542689e+000	0	0	0	0	0	0	81.704	1	1	46.8651	44.3235
DATA	2205	26	80	0	0	A_64_P093063	NM_001136272	2457.44	360.014	1.957607e+002	1.998062e+001	218	40	7.210590e+000	0	0	0	0	0	0	157.453	1	1	48.2044	40.2759
DATA	2206	26	81	0	0	A_44_P477406	NM_012751	2483	360	2.100979e+002	2.138820e+001	231	39	8.455449e+000	0	0	0	0	0	0	168.766	1	1	54.9904	38.8065
DATA	2207	26	82	0	0	A_64_P056816	NM_001100697	2507.89	359.945	7.764000e+001	8.737927e+000	124	40.5	7.093964e+000	0	0	0	0	0	0	62.3125	1	1	46.8651	40
DATA	2208	26	83	0	0	A_42_P580733	NM_001006981	2533.5	360	3.666483e+003	3.666703e+002	2961	40	8.909527e+000	0	0	0	0	0	0	2941.4	1	1	48.5334	40.1176
DATA	2209	26	84	66	1	DarkCorner	DarkCorner	2559.18	359.985	4.026526e+000	4.010488e+000	55.5	38	1.011103e+001	0	0	0	0	0	0	-6.53197	0	0	46.8651	38.6563
DATA	2210	26	85	66	1	DarkCorner	DarkCorner	2584.81	359.582	4.024563e+000	4.008533e+000	57	35	7.157318e+000	0	0	0	0	0	0	-5.68525	0	0	46.1809	35.3226
DATA	2211	27	1	66	1	DarkCorner	DarkCorner	438.893	365.5	3.665252e+000	3.650653e+000	62	42	1.822448e+001	0	0	0	0	0	0	-0.057704	0	0	56.9804	46.881
DATA	2212	27	2	66	1	DarkCorner	DarkCorner	464.418	365.573	3.651269e+000	3.636726e+000	58.5	38	9.612374e+000	0	0	0	0	0	0	-2.63599	0	0	57.5363	37.9091
DATA	2213	27	3	0	0	A_44_P289922	NM_139103	489.329	365.753	2.578603e+002	2.603931e+001	285	39	8.595497e+000	0	0	0	0	0	0	228.999	1	1	48.2044	37.5152
DATA	2214	27	4	0	0	A_64_P117149	ENSRNOT00000065538	515.107	365.5	1.559043e+002	1.600273e+001	199	39	9.005609e+000	0	0	0	0	0	0	138.987	1	1	56.9804	42.6207
DATA	2215	27	5	0	0	A_42_P524308	NM_019213	540.277	365.092	8.042575e+002	8.050609e+001	779.5	33.5	9.294249e+000	0	0	0	0	0	0	719.655	1	1	45.835	34.5625
DATA	2216	27	6	0	0	A_64_P037562	XM_001070892	565.667	365.5	3.333397e+002	3.352586e+001	363	33	8.955170e+000	0	0	0	0	0	0	299.432	1	1	57.5363	35.5152
DATA	2217	27	7	0	0	A_44_P267706	XR_085883	591.418	365.573	1.529186e+001	3.882032e+000	77	38.5	7.007988e+000	0	0	0	0	0	0	13.7891	1	0	57.5363	37.7188
DATA	2218	27	8	0	0	A_64_P082569	XM_001053354	616.582	365.573	4.995820e+000	3.589967e+000	65.5	38	7.479202e+000	0	0	0	0	0	0	4.52151	1	0	57.5363	37.4615
DATA	2219	27	9	0	0	A_64_P000539	NM_053930	641.93	365.732	9.391198e+003	9.391265e+002	8363.5	38	8.280045e+000	0	0	0	0	0	0	8530.88	1	1	47.5395	37.3226
DATA	2220	27	10	0	0	A_43_P22124	NM_213625	667	366.078	1.209789e+003	1.210304e+002	1136	34	6.586904e+000	0	0	0	0	0	0	1102.91	1	1	46.1809	35.3889
DATA	2221	27	11	0	0	A_44_P1012556	NM_001013988	692.412	366.191	1.064030e+002	1.120646e+001	161	34	5.342975e+000	0	0	0	0	1	0	97.3445	1	1	46.5243	33.0313
DATA	2222	27	12	0	0	A_64_P115457	NM_001106361	718.418	365.573	7.052627e+001	7.875586e+000	127	35	6.422193e+000	0	0	0	0	1	0	64.7408	1	1	57.5363	32.875
DATA	2223	27	13	0	0	A_64_P064229	A_64_P064229	743.5	365.648	1.136287e+001	3.673790e+000	70.5	39	6.076029e+000	0	0	0	0	0	0	10.4648	1	0	65	38.1579
DATA	2224	27	14	0	0	A_64_P039066	ENSRNOT00000041345	769	366	3.574382e+001	4.990320e+000	99	37	7.158911e+000	0	0	0	0	0	0	33.025	1	1	54.9904	37.2
DATA	2225	27	15	0	0	A_42_P574960	ENSRNOT00000068719	794.298	365.791	3.391291e+002	3.409018e+001	380	35	8.177002e+000	0	0	0	0	0	0	314.272	1	1	45.835	35.5676
DATA	2226	27	16	0	0	A_42_P600215	NM_175844	819.868	366.029	1.965546e+001	3.980880e+000	80	36	7.335218e+000	0	0	0	1	0	0	18.2685	1	1	46.8651	37.3448
DATA	2227	27	17	0	0	A_42_P607770	NM_001134616	844.757	366	4.645724e+003	4.645853e+002	4257	39.5	8.978222e+000	0	0	0	0	0	0	4329.49	1	1	46.8651	39.3571
DATA	2228	27	18	0	0	A_64_P003348	NM_001077660	870.071	366.214	3.374397e+002	3.391922e+001	377.5	37	7.174106e+000	0	0	0	0	0	0	315.29	1	1	46.8651	36.303
DATA	2229	27	19	0	0	A_64_P057828	A_64_P057828	895.569	366.246	6.260754e+002	6.270171e+001	650	35	8.397781e+000	0	0	0	0	0	0	586.402	1	1	45.4864	36.9091
DATA	2230	27	20	0	0	A_64_P081765	NM_134355	921.5	366	1.923793e+001	3.930449e+000	82	34.5	6.248280e+000	0	0	0	0	0	0	18.0596	1	1	54.1152	35.8214
DATA	2231	27	21	0	0	A_42_P758886	NM_019258	946.641	365.734	4.040124e+002	4.054578e+001	450	36	7.604948e+000	0	0	0	0	0	0	380.026	1	1	44.7812	37.9091
DATA	2232	27	22	0	0	A_42_P745470	XM_001066818	971.625	366	4.971442e+003	4.971559e+002	4704	41	8.115895e+000	0	0	0	0	0	0	4685.05	1	1	48.5334	40.9583
DATA	2233	27	23	0	0	A_42_P800949	NM_031787	997.221	366	1.382434e+002	1.423832e+001	189	37	1.059546e+001	0	0	0	0	0	0	130.5	1	1	46.1809	38.8286
DATA	2234	27	24	0	0	A_42_P738559	NM_012801	1022.38	366	7.350547e+003	7.350625e+002	6848	40	1.018686e+001	0	0	0	0	0	0	6948.99	1	1	48.5334	40.1852
DATA	2235	27	25	0	0	A_42_P749550	NM_001109359	1048.06	365.687	2.287651e+003	2.287904e+002	2219	40	7.152987e+000	0	0	0	0	0	0	2165.39	1	1	45.835	39.6522
DATA	2236	27	26	0	0	A_64_P007493	ENSRNOT00000006658	1073.26	366.242	3.467838e+001	4.853302e+000	96	42.5	1.027846e+001	0	0	0	0	0	0	32.8617	1	1	45.1352	44.3056
DATA	2237	27	27	0	0	A_64_P056182	NM_053363	1098.7	365.916	1.653793e+003	1.654141e+002	1614.5	41	1.087485e+001	0	0	0	0	0	0	1568.44	1	1	47.2035	44.0645
DATA	2238	27	28	0	0	A_42_P818546	NM_001191600	1124.04	365.944	4.293266e+002	4.306633e+001	473	38	8.871389e+000	0	0	0	0	0	0	407.428	1	1	46.8651	39.6923
DATA	2239	27	29	0	0	A_44_P407948	XM_001055260	1149.38	365.697	2.017470e+001	3.944153e+000	83	36	8.718871e+000	0	0	0	0	0	0	19.1531	1	1	45.835	38.2647
DATA	2240	27	30	66	-1	(-)3xSLv1	NegativeControl	1175.42	366.427	3.401740e+000	3.388191e+000	56.5	35	7.514860e+000	0	0	0	0	0	0	-7.43704	0	0	57.5363	34.1613
DATA	2241	27	31	0	0	A_64_P044505	NM_031587	1200.64	365.961	2.292224e+002	2.317133e+001	281	39	1.031296e+001	0	0	0	0	0	0	217.658	1	1	49.1849	42
DATA	2242	27	32	0	0	A_42_P685138	NM_153621	1225.86	365.958	4.123616e+002	4.137521e+001	462.5	36	7.962350e+000	0	0	0	1	0	0	391.459	1	1	46.8651	38.5517
DATA	2243	27	33	0	0	A_64_P121747	ENSRNOT00000050332	1250.97	366.014	1.586961e+001	3.743873e+000	79	37	8.179383e+000	0	0	0	0	0	0	15.0582	1	0	46.8651	37.8333
DATA	2244	27	34	0	0	A_42_P791436	NM_012750	1276.5	366.5	8.344015e+002	8.350911e+001	858.5	39	7.753327e+000	0	0	0	0	0	0	791.221	1	1	49.1849	39.3529
DATA	2245	27	35	0	0	A_44_P349309	NM_001100890	1302.42	366.427	3.113270e+002	3.131741e+001	366	40	1.033826e+001	0	0	0	0	0	0	294.934	1	1	57.5363	41.2903
DATA	2246	27	36	0	0	A_42_P502621	NM_024401	1327.19	366.016	2.867145e+001	4.447759e+000	89.5	39	8.356570e+000	0	0	0	0	0	0	27.1302	1	1	45.4864	39.9677
DATA	2247	27	37	0	0	A_43_P21574	NM_001012043	1352.89	365.727	7.594659e+001	8.323081e+000	135	41	8.960346e+000	0	0	0	0	0	0	71.7623	1	1	45.835	40.6341
DATA	2248	27	38	0	0	A_44_P496331	NM_001001085	1378.26	366.044	3.158525e+001	4.648363e+000	92	37	7.347605e+000	0	0	0	0	0	0	29.7986	1	1	46.1809	37.8889
DATA	2249	27	39	0	0	A_64_P016503	ENSRNOT00000003659	1403.75	365.926	7.308926e+001	8.068083e+000	135	40	8.587563e+000	0	0	0	0	0	0	68.8291	1	1	45.835	40.2903
DATA	2250	27	40	0	0	A_43_P13270	NM_134415	1428.79	366.194	1.121454e+004	1.121459e+003	10340	42	9.435139e+000	0	0	0	0	0	0	10540.1	1	1	47.5395	41.4857
DATA	2251	27	41	0	0	A_42_P553960	NM_001107831	1454.42	366.122	4.702615e+003	4.702740e+002	4267	41	1.156032e+001	0	0	0	0	0	0	4409.85	1	1	48.5334	41.7778
DATA	2252	27	42	0	0	A_44_P428997	NM_001107661	1479.53	366.568	2.180118e+002	2.207079e+001	264	37	8.561055e+000	0	0	0	0	0	0	203.957	1	1	49.1849	36.6667
DATA	2253	27	43	0	0	A_42_P619926	NM_001106578	1505.5	366.5	1.624346e+002	1.660550e+001	217.5	36	8.800306e+000	0	0	0	0	0	0	151.552	1	1	57.5363	37.7143
DATA	2255	27	45	0	0	A_44_P524471	NM_001106408	1555.81	366.261	5.475724e+002	5.486699e+001	572	38	6.168211e+000	0	0	0	0	0	0	507.917	1	1	46.5243	37.8056
DATA	2256	27	46	0	0	A_43_P10009	XM_347035	1581.23	366.227	4.596275e+003	4.596406e+002	4295	41.5	1.264348e+001	0	0	0	0	0	0	4249.73	1	1	45.4864	43.0667
DATA	2257	27	47	0	0	A_64_P068112	A_64_P068112	1606.94	366.46	5.933020e+003	5.933123e+002	5661	39	1.005129e+001	0	0	0	0	0	0	5467.06	1	1	44.0646	42.5185
DATA	2258	27	48	0	0	A_44_P191715	NM_021666	1632.28	366.263	7.484248e+000	3.583263e+000	71.5	41	8.349411e+000	0	0	0	0	0	0	6.87188	1	0	41.8414	40.7368
DATA	2259	27	49	0	0	A_64_P035769	NM_001108962	1657.82	366.379	1.604372e+003	1.604757e+002	1561	38.5	9.358830e+000	0	0	0	0	0	0	1467.62	1	1	45.4864	40.3438
DATA	2260	27	50	0	0	A_64_P158469	XM_579990	1683.11	366.671	9.301666e+000	3.651257e+000	72	39	9.095386e+000	0	0	0	0	0	0	8.47636	1	0	46.8651	39.5641
DATA	2261	27	51	0	0	A_43_P12811	NM_053464	1708.37	366.486	8.263487e+002	8.271087e+001	813	39	8.485578e+000	0	0	0	0	0	0	750.015	1	1	47.8731	39.7714
DATA	2262	27	52	0	0	A_44_P370694	NM_001107961	1734	366.545	1.959838e+001	4.063661e+000	81	39	8.351421e+000	0	0	0	0	0	0	17.7138	1	1	55.8519	39.7097
DATA	2263	27	53	0	0	A_42_P749550	NM_001109359	1759.11	366.352	2.315162e+003	2.315438e+002	2118	38	9.224675e+000	0	0	0	0	0	0	2083.67	1	1	47.8731	39.8065
DATA	2264	27	54	0	0	A_64_P125893	ENSRNOT00000021391	1784.32	366.533	1.086131e+004	1.086137e+003	9576	40	8.987813e+000	0	0	0	0	0	0	9733.03	1	1	49.1849	39.069
DATA	2265	27	55	0	0	A_44_P1000653	NM_031531	1810.2	366.614	1.907189e+003	1.907530e+002	1770	40.5	6.680937e+000	0	0	0	0	0	0	1701.29	1	1	47.2035	40.7778
DATA	2266	27	56	0	0	A_64_P035992	A_64_P035992	1835.28	366.705	1.647943e+002	1.687304e+001	217	38	7.060610e+000	0	0	0	0	0	0	146.341	1	1	44.4243	39.069
DATA	2267	27	57	0	0	A_42_P592385	NM_022935	1860.91	366.614	7.659148e+000	3.720041e+000	70	44	8.592355e+000	0	0	0	0	0	0	6.76954	1	0	57.259	43.2286
DATA	2268	27	58	0	0	A_64_P065624	ENSRNOT00000039260	1886.9	367.05	1.249373e+001	3.865281e+000	75	44.5	9.655205e+000	0	0	0	0	0	0	10.9899	1	0	49.5074	45.1333
DATA	2269	27	59	0	1	ERCC-00097_63	ERCC-00097_63	1911.71	366.681	2.790950e+001	4.614699e+000	91	42	8.958086e+000	0	0	0	0	0	0	24.4348	1	1	46.8651	42.2258
DATA	2270	27	60	0	0	A_42_P477625	NM_001108719	1936.66	366.878	1.675744e+003	1.676151e+002	1467	40.5	7.169604e+000	0	0	0	0	0	0	1460.23	1	1	48.8603	40.875
DATA	2271	27	61	0	0	A_42_P788030	NM_031618	1962.14	366.789	1.513505e+004	1.513510e+003	12844	44	9.024130e+000	0	0	0	0	0	0	13124.5	1	1	47.2035	44.7778
DATA	2272	27	62	0	0	A_44_P278247	XM_219377	1987.73	366.775	4.297817e+003	4.297979e+002	3572	46	1.010753e+001	0	0	0	0	0	0	3708.74	1	1	47.2035	46.1
DATA	2273	27	63	0	0	A_44_P189262	NM_024000	2013	366.797	9.549157e+003	9.549230e+002	7989	41	9.850012e+000	0	0	0	0	0	0	8200.74	1	1	46.8651	44.0909
DATA	2274	27	64	0	0	A_44_P212850	NM_019305	2038.5	367	3.181044e+001	4.928639e+000	93.5	43	1.142873e+001	0	0	0	0	0	0	27.1874	1	1	65	44.4828
DATA	2275	27	65	0	0	A_64_P144278	NM_001106525	2063.79	366.806	6.081427e+003	6.081544e+002	5128	44	9.914578e+000	0	0	0	0	0	0	5172.8	1	1	47.5395	46.3333
DATA	2276	27	66	0	0	A_44_P683816	NM_001127488	2089.26	366.824	1.422772e+002	1.472660e+001	185	39	7.491469e+000	0	0	0	0	0	0	120.448	1	1	46.1809	39.6176
DATA	2277	27	67	0	0	A_64_P048712	A_64_P048712	2114.86	367.211	6.138790e+001	7.229394e+000	115	41	6.753506e+000	0	0	0	0	0	0	51.7289	1	1	47.2035	40.7879
DATA	2278	27	68	0	0	A_64_P012813	NM_001106456	2140.5	367.059	1.353770e+001	4.067852e+000	74	37	8.671189e+000	0	0	0	0	0	0	11.355	1	0	47.2035	38.6875
DATA	2280	27	70	0	0	A_42_P598602	NM_001077646	2191	367	2.452220e+001	4.581155e+000	84	37	7.160894e+000	0	0	0	0	0	0	20.39	1	1	65	40.1818
DATA	2281	27	71	0	0	A_44_P375380	NM_001191572	2216.31	366.897	1.071530e+002	1.139809e+001	152	38	8.573656e+000	0	0	0	0	0	0	88.7262	1	1	45.835	38.4848
DATA	2282	27	72	0	0	A_64_P113555	NM_001000025	2241.65	366.827	3.916910e+000	3.902089e+000	64	40	7.710910e+000	0	0	0	0	0	0	0.643446	0	0	48.8603	40.6207
DATA	2283	27	73	0	0	A_42_P590466	NM_001009676	2267.09	366.896	1.949462e+003	1.949855e+002	1624	40	7.219125e+000	0	0	0	0	0	0	1601.67	1	1	46.8651	40.5172
DATA	2284	27	74	0	0	A_44_P224987	XM_001058317	2292.5	367.352	3.826579e+001	5.485251e+000	98	40.5	9.836884e+000	0	0	0	0	0	0	31.328	1	1	57.5363	42.25
DATA	2285	27	75	0	0	A_42_P557315	NM_001106280	2317.85	366.592	2.743747e+003	2.744030e+002	2180	43	1.020898e+001	0	0	0	0	0	0	2238.53	1	1	46.5243	41.16
DATA	2286	27	76	0	0	A_44_P375364	A_44_P375364	2343.42	367.427	4.520403e+001	6.006706e+000	100	41	1.066468e+001	0	0	0	0	0	0	36.7696	1	1	57.5363	41.8462
DATA	2287	27	77	0	0	A_44_P880152	NM_031553	2368.68	366.944	1.724887e+002	1.769916e+001	202	38	9.440506e+000	0	0	0	0	0	0	139.901	1	1	47.2035	39.1379
DATA	2288	27	78	0	0	A_64_P057575	NM_001191967	2394.42	367.427	8.438663e+001	9.328790e+000	133	37	7.227399e+000	0	0	0	0	0	0	68.274	1	1	57.5363	37.6471
DATA	2289	27	79	0	0	A_64_P122183	ENSRNOT00000009823	2419.28	367.104	2.658879e+001	4.791095e+000	84	40	8.156665e+000	0	0	0	0	0	0	21.4648	1	1	45.835	40.7419
DATA	2290	27	80	0	0	A_64_P057587	NM_019313	2445	367.455	4.376199e+001	5.924012e+000	100	41	7.903658e+000	0	0	0	0	0	0	35.2643	1	1	55.8519	42.303
DATA	2291	27	81	0	0	A_42_P480769	XM_001081609	2470.16	366.913	2.851463e+002	2.879368e+001	287.5	42	6.363178e+000	0	0	0	1	0	0	229.424	1	1	46.8651	40.5185
DATA	2292	27	82	0	0	A_42_P623151	NM_031026	2495.63	367.36	1.137374e+004	1.137381e+003	8897	37.5	8.274534e+000	0	0	0	0	0	0	9141.93	1	1	48.8603	37.3235
DATA	2293	27	83	0	0	A_42_P550241	NM_022954	2521.33	367.5	4.021512e+000	4.005494e+000	62	41	6.331859e+000	0	0	0	0	0	0	-1.00019	0	0	65	40.7143
DATA	2294	27	84	66	1	DarkCorner	DarkCorner	2546.5	367.5	4.022231e+000	4.006210e+000	61	40	9.480642e+000	0	0	0	0	0	0	-2.53388	0	0	57.5363	39.5152
DATA	2295	27	85	66	1	DarkCorner	DarkCorner	2571.51	367.095	4.021310e+000	4.005293e+000	52	38	7.374882e+000	0	0	0	0	0	0	-9.67173	0	0	51.0895	37.5556
DATA	2296	28	1	66	1	DarkCorner	DarkCorner	451.529	373	3.652901e+000	3.638351e+000	59	37	1.021812e+001	0	0	0	0	0	0	-2.33351	0	0	47.2035	38.0893
DATA	2297	28	2	0	0	A_42_P802550	NM_017365	476.77	373.176	2.249925e+002	2.278935e+001	267.5	37.5	7.606410e+000	0	0	0	0	0	0	199.72	1	1	48.2044	37.7333
DATA	2299	28	4	0	0	A_42_P619926	NM_001106578	527.486	373.278	1.631223e+002	1.670418e+001	207	38	1.059722e+001	0	0	0	0	0	0	145.9	1	1	47.5395	39.6364
DATA	2300	28	5	0	0	A_64_P052441	ENSRNOT00000004876	553.176	373.162	2.710593e+001	4.493351e+000	86	33	7.948578e+000	0	0	0	0	0	0	24.3362	1	1	46.1809	34.0714
DATA	2301	28	6	0	0	A_64_P056823	CA510211	578.492	372.738	1.523167e+001	3.881906e+000	77	31.5	8.101921e+000	0	0	0	0	0	0	13.7255	1	0	42.9674	34.8125
DATA	2302	28	7	0	0	A_42_P669870	NM_001011919	603.792	373	2.114133e+003	2.114432e+002	1961	38.5	8.046410e+000	0	0	0	0	0	0	1912.21	1	1	46.8651	36.6786
DATA	2303	28	8	0	0	A_42_P683634	NM_012946	629.5	373.352	3.187179e+004	3.187181e+003	29513	38	6.147628e+000	0	0	0	0	0	0	28936.2	1	1	57.5363	38.28
DATA	2304	28	9	0	0	A_42_P542809	NM_021671	654.463	372.776	3.312715e+002	3.331489e+001	363	35	8.379530e+000	0	0	0	0	0	0	301.794	1	1	46.5243	35.7037
DATA	2305	28	10	0	0	A_64_P065887	ENSRNOT00000024693	679.845	372.803	1.230296e+002	1.279644e+001	171	32.5	4.774666e+000	0	0	0	0	1	0	112.476	1	1	47.2035	32.65
DATA	2306	28	11	0	0	A_64_P043406	NM_001024902	705.288	372.879	5.449819e+002	5.461093e+001	547.5	35	5.776049e+000	0	0	0	0	1	0	499.95	1	1	45.835	33.0294
DATA	2307	28	12	0	0	A_64_P060769	NM_001191090	730.576	372.894	9.139141e+002	9.145824e+001	900	38	5.963380e+000	0	0	0	0	0	0	841.17	1	1	45.4864	36.5238
DATA	2308	28	13	0	0	A_64_P150789	A_64_P150789	756.241	373	1.190775e+001	3.682275e+000	72	38	5.600185e+000	0	0	0	0	0	0	10.9956	1	0	43.3362	38.1724
DATA	2309	28	14	0	0	A_64_P110254	NM_022404	781.567	372.761	4.641647e+003	4.641777e+002	4337	37.5	9.206291e+000	0	0	0	0	0	0	4299.11	1	1	46.5243	36.8235
DATA	2310	28	15	0	0	A_42_P700753	FQ212883	807.107	373.5	1.075147e+003	1.075705e+002	1070	36	8.726592e+000	0	0	0	0	0	0	998.852	1	1	56.9804	37.8182
DATA	2311	28	16	0	0	A_42_P503768	NM_001009466	832.147	373.059	2.039603e+002	2.068642e+001	244.5	37	6.412582e+000	0	0	0	0	0	0	189.998	1	1	46.8651	37.6061
DATA	2312	28	17	0	0	A_64_P106021	ENSRNOT00000017892	857.893	373.5	4.689709e+001	5.818771e+000	107	38	6.975856e+000	0	0	0	0	0	0	43.8064	1	1	56.9804	37.3448
DATA	2313	28	18	0	0	A_43_P10861	NM_001024879	883.418	373.427	1.549077e+002	1.586726e+001	202	36	7.432952e+000	0	0	0	0	0	0	145.058	1	1	57.5363	35.9655
DATA	2314	28	19	0	0	A_44_P562251	BF545174	908.582	373.427	4.887735e+001	5.970103e+000	108.5	36	7.083736e+000	0	0	0	0	0	0	45.8742	1	1	57.5363	37.6
DATA	2315	28	20	0	0	A_42_P608768	ENSRNOT00000009898	933.675	373.455	9.211545e+001	9.826253e+000	152	39	6.600763e+000	0	0	0	0	0	0	86.6383	1	1	49.8279	39.4848
DATA	2316	28	21	0	0	A_64_P117115	NM_001109329	959.5	373.5	1.775939e+001	3.848411e+000	78	38	8.142954e+000	0	0	0	0	0	0	16.7366	1	1	57.5363	38.6667
DATA	2317	28	22	0	0	A_64_P043331	ENSRNOT00000032411	984.522	373.145	1.195647e+002	1.243279e+001	175	42	9.222798e+000	0	0	0	0	0	0	112.87	1	1	47.2035	41.68
DATA	2318	28	23	0	0	A_42_P664274	NM_001079705	1010.33	373.5	6.265141e+002	6.274375e+001	643	39	9.940257e+000	0	0	0	0	0	0	592.395	1	1	57.5363	40.3939
DATA	2319	28	24	0	0	A_64_P044593	NM_001173451	1035.08	372.859	3.004091e+002	3.023254e+001	352	40	5.944845e+000	0	0	0	0	0	0	284.406	1	1	45.835	39.2
DATA	2320	28	25	0	0	A_64_P006978	NM_001109371	1061.11	373.5	1.921593e+001	3.900482e+000	83	40	9.193673e+000	0	0	0	0	0	0	18.2151	1	1	65	41.9487
DATA	2321	28	26	0	0	A_64_P119390	NM_001109519	1085.84	373.041	1.863233e+001	3.869476e+000	78	40.5	9.708555e+000	0	0	0	0	0	0	17.6773	1	1	46.8651	42.4737
DATA	2322	28	27	0	0	A_64_P034714	A_64_P034714	1111.67	373.5	2.207815e+001	4.044423e+000	85	40	7.477857e+000	0	0	0	0	0	0	20.9632	1	1	57.5363	41.7813
DATA	2323	28	28	0	0	A_44_P535959	NM_001107650	1136.75	373.342	2.182059e+002	2.208188e+001	278.5	38.5	8.900970e+000	0	0	0	0	0	0	207.288	1	1	48.2044	39.5
DATA	2324	28	29	0	0	A_64_P286274	ENSRNOT00000055318	1162.5	373.5	1.334617e+002	1.376898e+001	192	37	9.057969e+000	0	0	0	0	0	0	126.825	1	1	57.5363	37.2414
DATA	2325	28	30	0	0	A_44_P333384	NM_001024788	1188	373.545	1.602570e+001	3.745762e+000	80	39	7.720965e+000	0	0	0	0	0	0	15.2299	1	0	55.8519	37.5517
DATA	2326	28	31	0	0	A_42_P522194	NM_012914	1213.08	373.162	6.622849e+001	7.438339e+000	124	39	1.061785e+001	0	0	0	0	0	0	62.9281	1	1	47.8731	41.6364
DATA	2327	28	32	0	0	A_44_P273859	NM_017021	1238.66	373.328	3.401012e+000	3.387466e+000	61	40.5	9.176528e+000	0	0	0	0	0	0	-2.60576	0	0	44.4243	39.7188
DATA	2328	28	33	0	0	A_43_P11665	NM_013024	1264.23	373.271	4.275206e+001	5.455843e+000	104	38	7.077836e+000	0	0	0	0	0	0	40.5826	1	1	46.8651	37.9688
DATA	2329	28	34	0	0	A_64_P118273	NM_001170593	1289.58	373.573	3.862766e+001	5.140809e+000	101.5	39	6.101936e+000	0	0	0	0	0	0	36.6386	1	1	57.5363	41.1852
DATA	2330	28	35	0	0	A_42_P762814	NM_031318	1314.45	373.548	2.158487e+003	2.158755e+002	2018.5	38.5	6.828355e+000	0	0	0	0	0	0	2045.25	1	1	49.1849	37.8333
DATA	2331	28	36	0	0	A_44_P384017	NM_031688	1340	373.785	1.178823e+002	1.226872e+001	175	41	8.521551e+000	0	0	0	0	0	0	111.559	1	1	45.4864	41.0465
DATA	2332	28	37	0	0	A_64_P118872	A_64_P118872	1365.06	373.426	4.596623e+000	3.435860e+000	70.5	40	8.105720e+000	0	0	0	0	0	0	4.34356	1	0	46.5243	39.2703
DATA	2333	28	38	0	0	A_42_P599210	NM_001008326	1390.94	373.462	7.268404e+002	7.276403e+001	742	40.5	7.988734e+000	0	0	0	0	0	0	685.64	1	1	44.7812	40.225
DATA	2334	28	39	0	0	A_44_P305801	NM_001033894	1416.25	373.373	2.029639e+003	2.029926e+002	1920	41.5	1.169076e+001	0	0	0	0	0	0	1910.92	1	1	46.1809	42.5882
DATA	2335	28	40	0	0	A_64_P085462	A_64_P085462	1441.91	373.614	2.483284e+004	2.483287e+003	23193	41	8.299825e+000	0	0	0	0	0	0	23330.7	1	1	57.259	40.875
DATA	2336	28	41	0	0	A_42_P488000	NM_001108479	1466.75	373.809	3.903190e+002	3.918253e+001	423	37	7.402139e+000	0	0	0	0	0	0	365.881	1	1	46.1809	37.3333
DATA	2337	28	42	0	0	A_42_P818546	NM_001191600	1492.32	373.746	4.051735e+002	4.066322e+001	432.5	37	9.184660e+000	0	0	0	0	0	0	378.835	1	1	47.5395	37.6286
DATA	2338	28	43	0	0	A_44_P488489	TC610872	1517.85	373.903	9.449290e+002	9.455588e+001	919	37	6.413796e+000	0	0	0	0	0	0	881.093	1	1	46.8651	37.3667
DATA	2339	28	44	0	0	A_64_P153971	A_64_P153971	1543.61	374.096	3.474661e+000	3.469177e+000	66	38	5.413450e+000	0	0	0	0	0	0	2.23719	0	0	49.8279	37.7188
DATA	2340	28	45	0	0	A_64_P077985	NM_001170478	1568.91	373.935	4.169182e+001	5.425339e+000	99	39	9.824239e+000	0	0	0	0	0	0	38.6401	1	1	54.4085	40.1481
DATA	2341	28	46	0	0	A_44_P576822	NM_080771	1594	373.797	7.598928e+002	7.606906e+001	753	42	1.084769e+001	0	0	0	0	0	0	701.972	1	1	46.8651	42.8788
DATA	2342	28	47	0	0	A_64_P134310	A_64_P134310	1619.66	373.923	4.252621e+001	5.504633e+000	104	42.5	9.720644e+000	0	0	0	0	0	0	39.1479	1	1	45.4864	42.3438
DATA	2343	28	48	0	0	A_64_P134706	NM_001107533	1645.03	373.774	3.521955e+000	3.508527e+000	63	43	9.861866e+000	0	0	0	0	0	0	0.595138	0	0	45.4864	41.5128
DATA	2344	28	49	0	0	A_42_P469751	XM_001054007	1670.08	373.901	1.655657e+002	1.692683e+001	215	42	8.972142e+000	0	0	0	0	0	0	151.295	1	1	46.8651	42.0256
DATA	2345	28	50	0	0	A_64_P082653	ENSRNOT00000020906	1695.5	374	4.726486e+001	5.902112e+000	106	42	9.719728e+000	0	0	0	0	0	0	43.0216	1	1	54.1152	42.8387
DATA	2346	28	51	0	0	A_43_P18902	NM_001109221	1720.81	373.794	9.017840e+001	9.691186e+000	144	37	8.359150e+000	0	0	0	0	0	0	81.7482	1	1	46.1809	37.6944
DATA	2347	28	52	0	0	A_64_P086719	ENSRNOT00000065918	1746.69	373.794	4.056300e+000	3.587560e+000	69	38	8.772685e+000	0	0	0	0	0	0	3.66138	1	0	46.5243	39
DATA	2348	28	53	0	0	A_64_P138585	TC587165	1771.67	373.973	2.691373e+003	2.691611e+002	2353	37	9.370165e+000	0	0	0	0	0	0	2419.09	1	1	49.1849	37
DATA	2349	28	54	0	0	A_64_P230444	ENSRNOT00000010282	1796.83	374	2.932652e+003	2.932872e+002	2632	39.5	8.097178e+000	0	0	0	0	0	0	2624.43	1	1	46.8651	38.75
DATA	2350	28	55	0	0	A_64_P124427	TC642834	1822.37	373.809	4.795611e+001	6.003622e+000	108	39	8.385648e+000	0	0	0	0	0	0	42.7201	1	1	46.8651	40.6296
DATA	2351	28	56	0	0	A_42_P778587	NM_001135767	1847.83	373.677	1.193333e+002	1.247283e+001	176	38.5	7.704028e+000	0	0	0	0	0	0	105.812	1	1	45.4864	40.2647
DATA	2352	28	57	0	0	A_42_P526030	NM_057197	1873.28	373.905	3.059016e+003	3.059233e+002	2671	43	1.028508e+001	0	0	0	0	0	0	2699.79	1	1	48.8603	43.871
DATA	2353	28	58	0	0	A_64_P022561	XM_001070923	1898.51	374.532	6.156135e+001	7.163261e+000	115	43	7.841376e+000	0	0	0	0	0	0	54.0809	1	1	50.4627	43.7778
DATA	2354	28	59	0	0	A_64_P126226	NM_001105901	1924.42	374.427	9.139480e+001	9.852734e+000	145	38.5	9.806546e+000	0	0	0	0	0	0	79.8973	1	1	57.5363	40.6563
DATA	2355	28	60	0	0	A_64_P089541	NM_001106214	1949.58	374.427	1.745866e+002	1.784604e+001	218	44	6.755585e+000	0	0	0	0	0	0	151.897	1	1	65	42.931
DATA	2356	28	61	0	0	A_44_P205869	NM_138891	1975.42	374.427	2.780217e+002	2.804946e+001	305	45.5	1.207086e+001	0	0	0	0	0	0	240.703	1	1	57.5363	48.5333
DATA	2357	28	62	0	0	A_44_P491796	NM_012881	2000.58	374.427	4.166240e+001	5.594805e+000	102	42	8.648699e+000	0	0	0	1	0	0	35.8977	1	1	57.5363	43.4
DATA	2358	28	63	0	0	A_64_P132706	NM_001008304	2025.75	374.026	2.875987e+004	2.875989e+003	23538	46	1.116738e+001	0	0	0	0	0	0	24661.1	1	1	49.1849	46.3235
DATA	2359	28	64	0	0	A_64_P040715	NM_001011979	2051	373.774	5.274561e+002	5.288019e+001	517	46	1.078257e+001	0	0	0	0	0	0	450.122	1	1	45.4864	46.0286
DATA	2360	28	65	0	0	A_44_P191055	NM_001107693	2076.38	374.237	1.404510e+003	1.405021e+002	1228.5	38	5.174174e+000	0	0	0	0	0	0	1192.99	1	1	49.1849	37.8148
DATA	2361	28	66	0	0	A_64_P077493	XR_005942	2102.29	374.347	6.732738e+000	3.865149e+000	69	39	7.253088e+000	0	0	0	0	0	0	5.69163	1	0	48.2044	39.8462
DATA	2362	28	67	0	0	A_44_P317600	NM_012612	2127.24	374.394	1.793074e+002	1.833381e+001	221	39	6.247364e+000	0	0	0	0	0	0	150.899	1	1	47.5395	39.3793
DATA	2363	28	68	0	0	A_42_P751368	NM_001047874	2152.68	374.4	1.632144e+003	1.632595e+002	1397	40	1.102458e+001	0	0	0	0	0	0	1367.39	1	1	50.7771	41.8148
DATA	2364	28	69	0	0	A_42_P711568	NM_001107584	2178.12	373.956	4.695348e+003	4.695507e+002	3910.5	41	7.873767e+000	0	0	0	0	0	0	3916.27	1	1	46.8651	40.6061
DATA	2365	28	70	0	0	A_64_P091817	A_64_P091817	2203.6	374.147	3.739667e+002	3.759678e+001	375	36	7.395578e+000	0	0	0	0	0	0	310.601	1	1	48.8603	36.8621
DATA	2366	28	71	0	0	A_64_P006628	NM_172328	2229.44	374.632	3.338520e+001	5.125996e+000	95	39.5	8.026296e+000	0	0	0	0	0	0	27.6155	1	1	41.8414	40.0833
DATA	2367	28	72	0	0	A_64_P057760	NM_001191643	2254.37	374.071	1.280468e+002	1.338687e+001	169	40	6.627306e+000	0	0	0	0	0	0	105.505	1	1	46.8651	40.7241
DATA	2368	28	73	0	0	A_44_P150013	NM_001134495	2279.89	374.5	3.934901e+000	3.919228e+000	55	41	8.487067e+000	0	0	0	0	0	0	-7.25572	0	0	65	41.303
DATA	2369	28	74	0	0	A_44_P526975	NM_001002822	2305.94	374.084	1.321032e+002	1.378348e+001	176	40	8.480465e+000	0	0	0	0	0	0	108.06	1	1	51.7088	40.4194
DATA	2370	28	75	66	-1	(-)3xSLv1	NegativeControl	2330.23	374.39	3.961177e+000	3.945399e+000	55	40	9.368523e+000	0	0	0	0	0	0	-8.61735	0	0	49.8279	40
DATA	2371	28	76	0	0	A_42_P648937	NM_001191732	2356.11	374.5	6.792702e+002	6.804219e+001	596	39	8.632908e+000	0	0	0	0	0	0	552.293	1	1	56.9804	39.2069
DATA	2372	28	77	0	0	A_44_P533786	NM_053749	2381.41	374.69	3.073431e+001	5.018803e+000	88	38	8.345525e+000	0	0	0	0	0	0	24.9235	1	1	42.2201	38.8276
DATA	2373	28	78	0	0	A_64_P156165	S68987	2406.63	374.5	4.422853e+003	4.423032e+002	3629.5	39	8.595778e+000	0	0	0	0	0	0	3578.16	1	1	47.8731	40.2286
DATA	2374	28	79	0	0	A_64_P084293	NM_001000525	2432.11	374.607	1.617313e+001	4.300739e+000	75	41	8.901470e+000	0	0	0	0	0	0	13.0581	1	0	43.7019	41.9744
DATA	2375	28	80	0	0	A_42_P708569	NM_001191837	2457.38	374.444	4.674095e+003	4.674265e+002	3717.5	42	5.700742e+000	0	0	0	1	0	0	3767.55	1	1	48.2044	41.5385
DATA	2376	28	81	0	0	A_64_P112215	NM_001110141	2483	374.545	3.509062e+002	3.531750e+001	341.5	39.5	8.812564e+000	0	0	0	0	0	0	282.492	1	1	55.8519	38.625
DATA	2377	28	82	0	0	A_42_P567793	NM_001107668	2508.25	374.587	1.591916e+003	1.592419e+002	1310	38	7.896754e+000	0	0	0	0	0	0	1280.48	1	1	48.8603	38.3889
DATA	2378	28	83	0	0	A_42_P481087	XM_232226	2533.59	374.72	5.498542e+002	5.513084e+001	502	41	7.793202e+000	0	0	0	0	0	0	442.111	1	1	48.8603	42.6552
DATA	2379	28	84	66	1	DarkCorner	DarkCorner	2559.21	374.738	4.017367e+000	4.001366e+000	61.5	36	6.956848e+000	0	0	0	0	0	0	-2.58968	0	0	50.4627	37.9091
DATA	2380	28	85	66	1	DarkCorner	DarkCorner	2584.51	374.881	4.015041e+000	3.999049e+000	57.5	34	7.218672e+000	0	0	0	0	0	0	-4.13535	0	0	51.0895	34.3887
DATA	2381	29	1	66	1	DarkCorner	DarkCorner	437.988	381.238	7.273561e+000	3.711486e+000	67	51	1.859600e+001	0	0	0	0	1	0	6.43019	1	0	49.1849	52.6825
DATA	2382	29	2	66	1	DarkCorner	DarkCorner	463.973	380.356	3.640924e+000	3.626422e+000	61	38.5	8.454819e+000	0	0	0	0	0	0	-0.949384	0	0	49.1849	39.9706
DATA	2383	29	3	0	0	A_64_P096512	NM_031782	489.385	380.5	5.900667e+003	5.900778e+002	5028	38	7.660596e+000	0	0	0	0	0	0	5255.03	1	1	49.8279	38.5517
DATA	2384	29	4	0	0	A_44_P172814	NM_173102	514.787	380.32	1.310022e+004	1.310027e+003	11806	39	9.372780e+000	0	0	0	0	0	0	11710.2	1	1	49.5074	40.8148
DATA	2385	29	5	0	0	A_42_P788040	NM_001025053	540.721	379.956	5.322324e+001	6.417645e+000	111.5	36	9.191979e+000	0	0	0	0	0	0	47.7549	1	1	46.1809	36.6774
DATA	2386	29	6	0	0	A_42_P808945	NM_181368	565.662	380.122	2.923337e+002	2.945088e+001	323.5	31.5	7.434725e+000	0	0	0	1	0	0	263.267	1	1	48.8603	33.6429
DATA	2387	29	7	0	0	A_64_P162713	A_64_P162713	591.418	380.427	3.573433e+000	3.563739e+000	64	33	7.676976e+000	0	0	0	0	0	0	1.6256	0	0	57.5363	34.6897
DATA	2388	29	8	0	0	A_44_P501204	NM_017361	616.639	380.194	1.537799e+002	1.578163e+001	201	37.5	8.321332e+000	0	0	0	0	0	0	139.516	1	1	47.5395	36.125
DATA	2389	29	9	0	0	A_42_P785926	NM_001108289	642.107	380.5	5.832244e+002	5.842939e+001	586	38	8.599195e+000	0	0	0	0	0	0	531.062	1	1	56.9804	36.8846
DATA	2390	29	10	0	0	A_42_P616287	NM_001134555	666.797	381.031	9.473131e+001	1.010638e+001	148	34	6.039506e+000	0	0	0	0	0	0	86.5614	1	1	45.4864	34.6286
DATA	2391	29	11	66	-1	(-)3xSLv1	NegativeControl	692.667	380.5	3.523221e+000	3.509188e+000	55	34	3.454466e+000	0	0	0	0	0	0	-7.20785	0	0	57.5363	34
DATA	2392	29	12	0	0	A_43_P12365	NM_023101	718.333	380.5	2.433218e+001	4.260538e+000	83	35	5.811464e+000	0	0	0	0	0	0	22.3851	1	1	57.5363	34.1429
DATA	2393	29	13	0	0	A_64_P076643	ENSRNOT00000057620	743.27	379.81	3.500594e+000	3.494655e+000	64	39	5.167872e+000	0	0	0	0	0	0	2.18141	0	0	45.1352	38.2759
DATA	2394	29	14	0	0	A_64_P074865	XR_008898	769	380.545	3.489208e+000	3.475310e+000	62.5	38.5	6.308955e+000	0	0	0	0	0	0	-1.59676	0	0	65	39.3929
DATA	2395	29	15	0	0	A_64_P009582	XM_214287	794.189	380.392	1.419334e+004	1.419338e+003	13196	41	1.001079e+001	0	0	0	0	0	0	13179.1	1	1	49.1849	41.1111
DATA	2396	29	16	0	0	A_44_P527270	NM_020073	819.643	380.443	6.516843e+001	7.376169e+000	124	38	8.007468e+000	0	0	0	0	0	0	60.6849	1	1	47.5395	38.4667
DATA	2397	29	17	0	0	A_44_P530813	NM_012922	845.333	380.5	2.099075e+002	2.127169e+001	265	39	7.058741e+000	0	0	0	0	0	0	196.001	1	1	57.5363	38.2973
DATA	2398	29	18	0	0	A_64_P078210	NM_001044303	870.582	380.573	3.581072e+001	4.963629e+000	95	37	5.674558e+000	0	0	0	0	0	0	33.5231	1	1	57.5363	36.8438
DATA	2399	29	19	0	0	A_42_P764985	NM_133402	895.52	380.853	3.444283e+003	3.444453e+002	3159	37	7.317103e+000	0	0	0	0	0	0	3231.9	1	1	49.8279	38.04
DATA	2400	29	20	0	0	A_43_P23097	NM_001011965	921.094	380.703	3.021870e+001	4.564843e+000	93.5	38.5	6.409176e+000	0	0	0	0	0	0	28.4178	1	1	45.1352	39.2059
DATA	2401	29	21	0	0	A_43_P19450	NM_001105713	946.803	380.535	1.465531e+002	1.504782e+001	196.5	39	7.711537e+000	0	0	0	0	0	0	138.099	1	1	47.5395	39.303
DATA	2402	29	22	0	0	A_42_P514419	NM_001009599	971.671	380.753	6.532313e+002	6.541199e+001	668	41	1.239382e+001	0	0	0	0	0	0	616.673	1	1	48.2044	41.0417
DATA	2403	29	23	0	0	A_64_P123974	A_64_P123974	997.582	380.573	9.016323e+000	3.520047e+000	71	41	8.819681e+000	0	0	0	0	0	0	8.52584	1	0	57.5363	41.2821
DATA	2404	29	24	0	0	A_64_P221399	NM_134415	1022.62	380.735	1.369099e+003	1.369521e+002	1366.5	40	7.125027e+000	0	0	0	0	0	0	1296.49	1	1	46.5243	39.1379
DATA	2405	29	25	0	0	A_44_P760124	A_44_P760124	1048.06	380.621	3.204863e+002	3.222779e+001	376	40	8.735281e+000	0	0	0	0	0	0	303.866	1	1	45.4864	41.05
DATA	2406	29	26	0	0	A_42_P589551	NM_001037093	1073.34	380.816	1.478153e+003	1.478542e+002	1471	44	1.049067e+001	0	0	0	0	0	0	1402.98	1	1	49.5074	46.1481
DATA	2407	29	27	0	0	A_42_P645467	NM_001108804	1098.65	380.649	1.379585e+001	3.657351e+000	75.5	41	5.595927e+000	0	0	0	0	0	0	13.1048	1	0	50.1463	41.2424
DATA	2408	29	28	0	0	A_64_P036006	A_64_P036006	1124.56	380.584	3.605923e+000	3.404229e+000	67	38	9.133648e+000	0	0	0	0	0	0	3.42743	1	0	49.8279	39.6
DATA	2409	29	29	0	0	A_64_P088575	NM_001106355	1149.91	380.614	1.831952e+002	1.862940e+001	238	38	9.681656e+000	0	0	0	0	0	0	174.196	1	1	65	38.1714
DATA	2410	29	30	0	0	A_42_P798776	XM_002725203	1175.06	380.687	2.935292e+003	2.935487e+002	2794	35	8.837986e+000	0	0	0	0	0	0	2791.62	1	1	45.835	35.12
DATA	2411	29	31	0	0	A_64_P017424	XM_001067041	1200.5	381	3.396669e+000	3.383140e+000	64.5	39	1.118715e+001	0	0	0	0	0	0	-0.0813529	0	0	54.1152	41.5938
DATA	2412	29	32	0	0	A_64_P147358	NM_001105764	1225.82	380.845	1.027871e+003	1.028428e+002	1020.5	38	9.470148e+000	0	0	0	0	0	0	977.277	1	1	46.8651	39.0606
DATA	2413	29	33	0	0	A_42_P522285	NM_001044263	1251.22	380.89	3.300960e+002	3.318278e+001	375	41	9.873719e+000	0	0	0	0	0	0	313.697	1	1	47.8731	41.9032
DATA	2414	29	34	0	0	A_64_P130184	NM_017207	1276.57	380.9	6.685529e+002	6.694109e+001	706.5	37.5	5.239628e+000	0	0	0	0	0	0	634.889	1	1	47.5395	37.75
DATA	2415	29	35	0	0	A_44_P167930	NM_012720	1302.08	380.901	3.665439e+003	3.665595e+002	3403	40	7.044501e+000	0	0	0	0	0	0	3477.62	1	1	46.8651	41
DATA	2416	29	36	0	0	A_64_P135305	NM_001013426	1327.31	381.014	3.466586e+003	3.466752e+002	3228	40	6.558662e+000	0	0	0	0	0	0	3285.22	1	1	47.2035	40.1176
DATA	2417	29	37	0	0	A_64_P100182	NM_001077678	1353	381	7.300854e+000	3.477371e+000	70	40.5	8.625543e+000	0	0	0	0	0	0	6.90927	1	0	54.9904	40
DATA	2418	29	38	0	0	A_44_P521699	NM_001007728	1378.24	380.986	2.604603e+002	2.626769e+001	309	37	7.978427e+000	0	0	0	0	0	0	246.1	1	1	46.8651	37.9697
DATA	2419	29	39	0	0	A_64_P053516	NM_001001280	1403.5	381	7.236972e+000	3.487295e+000	70.5	41	1.110035e+001	0	0	0	0	0	0	6.82571	1	0	54.1152	42.0303
DATA	2420	29	40	0	0	A_64_P073183	XM_001061392	1429.01	381.118	4.331020e+003	4.331155e+002	4004	41	8.930921e+000	0	0	0	0	0	0	4076.67	1	1	46.8651	40.9429
DATA	2421	29	41	0	0	A_64_P067447	NM_001109440	1454.5	381	6.561277e+002	6.570215e+001	684	40	8.563297e+000	0	0	0	0	0	0	616.207	1	1	48.5334	38.4828
DATA	2422	29	42	0	0	A_64_P089251	NM_001014109	1480.21	381.162	7.985520e+001	8.692717e+000	137.5	37	7.732875e+000	0	0	0	0	0	0	74.8132	1	1	46.1809	35.2121
DATA	2423	29	43	0	0	A_64_P118192	NM_022797	1505.5	381	7.713260e+002	7.720942e+001	782	36	6.979527e+000	0	0	0	0	0	0	720.719	1	1	48.5334	34.9
DATA	2424	29	44	0	0	A_64_P082584	ENSRNOT00000024258	1530.73	381.239	1.828473e+002	1.860793e+001	240.5	38	6.446598e+000	0	0	0	0	0	0	170.375	1	1	46.1809	39.4
DATA	2425	29	45	0	0	A_42_P465677	NM_001106241	1556.24	380.667	1.417361e+002	1.459071e+001	195	38	5.519197e+000	0	0	0	0	0	0	131.661	1	1	45.4864	38
DATA	2426	29	46	0	0	A_42_P781999	NM_001106378	1581	380.774	1.450005e+004	1.450009e+003	13353.5	40.5	9.799882e+000	0	0	0	0	0	0	13427.5	1	1	45.4864	41.5526
DATA	2427	29	47	0	0	A_44_P991472	NM_134374	1606.64	380.866	1.008026e+003	1.008629e+002	954	42	9.974879e+000	0	0	0	0	0	0	930.3	1	1	45.835	42.6765
DATA	2428	29	48	0	0	A_42_P767737	AY724480	1631.88	380.855	2.040787e+003	2.041087e+002	1887	42	9.643062e+000	0	0	0	0	0	0	1876.81	1	1	46.8651	40.3636
DATA	2429	29	49	0	0	A_42_P648200	NM_001037356	1657.6	381.068	1.192231e+002	1.242874e+001	173	40.5	9.566753e+000	0	0	0	0	0	0	109.235	1	1	48.5334	41.1316
DATA	2430	29	50	0	0	A_64_P006062	NM_001191695	1683.16	381.371	8.699475e+001	9.386596e+000	142.5	42	7.075844e+000	0	0	0	0	0	0	79.4008	1	1	44.0646	41.3514
DATA	2431	29	51	0	0	A_42_P728230	NM_001037782	1708.18	381.493	2.131987e+003	2.132281e+002	1927	38	1.078881e+001	0	0	0	0	0	0	1938.26	1	1	47.8731	40.6857
DATA	2432	29	52	0	0	A_64_P106011	A_64_P106011	1733.95	381.477	6.656170e+000	3.615772e+000	70.5	39	8.238743e+000	0	0	0	0	0	0	6.02601	1	0	55.8519	39.2424
DATA	2433	29	53	0	0	A_42_P622661	NM_001024292	1758.89	381.123	1.179676e+003	1.180215e+002	1090	39	9.835580e+000	0	0	0	0	0	0	1063.5	1	1	46.8651	40.6364
DATA	2434	29	54	0	0	A_42_P619844	NM_001030037	1784.27	381.418	4.582769e+003	4.582909e+002	3876.5	39	8.337063e+000	0	0	0	0	0	0	4113.59	1	1	50.7771	38.1071
DATA	2436	29	56	0	0	A_64_P128260	XM_001056985	1835.25	381.441	7.014488e+002	7.023807e+001	676.5	39	7.084972e+000	0	0	0	0	0	0	623.956	1	1	46.8651	40.4444
DATA	2437	29	57	0	0	A_44_P1034950	NM_053294	1860.89	381.5	2.045237e+002	2.077272e+001	245	44	7.733357e+000	0	0	0	0	0	0	181.08	1	1	56.9804	43.973
DATA	2438	29	58	0	0	A_64_P080316	NM_139113	1886.19	381.519	1.678017e+002	1.717280e+001	212.5	44	9.176759e+000	0	0	0	0	0	0	147.873	1	1	49.8279	46.2903
DATA	2439	29	59	0	0	A_64_P053069	NM_001106820	1911.58	381.427	4.156400e+002	4.172558e+001	426.5	41	9.158640e+000	0	0	0	0	0	0	364.537	1	1	57.5363	41.5455
DATA	2440	29	60	0	0	A_42_P498066	NM_031136	1937.11	381.5	6.376627e+004	6.376628e+003	54625	42	7.346528e+000	0	0	0	0	0	0	55658	1	1	56.9804	40.2941
DATA	2441	29	61	0	0	A_44_P277068	ENSRNOT00000058491	1962.08	380.778	3.520773e+003	3.520968e+002	3129	45	6.876796e+000	0	0	0	0	0	0	3058.29	1	1	45.4864	43.5
DATA	2442	29	62	0	0	A_44_P685613	XM_225679	1987.94	381.494	1.043468e+003	1.044132e+002	952	43	9.498941e+000	0	0	0	0	0	0	902.039	1	1	50.4627	44.3333
DATA	2443	29	63	0	0	A_64_P124364	ENSRNOT00000015807	2013.42	381.573	1.478317e+002	1.524893e+001	193.5	44.5	1.102154e+001	0	0	0	0	0	0	127.18	1	1	57.5363	46.3421
DATA	2444	29	64	0	0	A_42_P466362	NM_017142	2038.58	381.573	2.540364e+002	2.568007e+001	280	45	1.183199e+001	0	0	0	0	0	0	217.512	1	1	57.5363	44.9375
DATA	2445	29	65	0	0	A_64_P081517	ENSRNOT00000037639	2064	381.545	7.655679e+001	8.536138e+000	126	45	1.019068e+001	0	0	0	0	0	0	65.2382	1	1	55.8519	46.25
DATA	2446	29	66	0	0	A_42_P629394	NM_031683	2088.97	381.873	1.414551e+003	1.415060e+002	1254.5	38	7.717457e+000	0	0	0	0	0	0	1199.91	1	1	46.8651	39.6774
DATA	2447	29	67	0	0	A_44_P500975	NM_001000833	2114.58	381.573	3.583862e+001	5.231397e+000	95	40.5	7.570901e+000	0	0	0	0	0	0	30.2578	1	1	57.5363	39.8125
DATA	2448	29	68	0	0	A_64_P165046	ENSRNOT00000015927	2140.42	381.573	3.930961e+001	5.487305e+000	99	38	6.309343e+000	0	0	0	0	0	0	33.0355	1	1	57.5363	38.5676
DATA	2449	29	69	0	0	A_44_P222865	XM_235305	2165.46	381.254	4.279998e+003	4.280170e+002	3669	40	9.143366e+000	0	0	0	0	0	0	3581.06	1	1	47.5395	40.2963
DATA	2451	29	71	0	0	A_64_P131688	XM_574187	2215.72	381.469	3.893149e+000	3.877642e+000	62.5	38.5	8.761110e+000	0	0	0	0	0	0	-2.89343	0	0	44.7812	38.7813
DATA	2452	29	72	0	0	A_42_P556457	NM_001033931	2241.54	381.614	1.193443e+003	1.194078e+002	1018	39.5	6.771814e+000	0	0	0	0	0	0	986.293	1	1	47.5395	39.9333
DATA	2453	29	73	0	0	A_42_P734384	NM_001108406	2266.99	381.616	1.862188e+003	1.862598e+002	1538	39	6.470466e+000	0	0	0	1	0	0	1533.14	1	1	48.8603	38.5625
DATA	2454	29	74	0	0	A_42_P728032	XM_001066058	2292.48	381.853	7.175995e+002	7.186704e+001	662	40.5	9.441593e+000	0	0	0	0	0	0	588.702	1	1	49.8279	41.2105
DATA	2455	29	75	0	0	A_64_P151525	A_64_P151525	2317.91	381.614	5.132562e+001	6.467577e+000	107	40	5.857714e+000	0	0	0	0	0	0	41.9643	1	1	57.259	39.7931
DATA	2456	29	76	0	0	A_43_P19276	ENSRNOT00000039523	2343.5	381.648	3.800546e+002	3.820992e+001	372	43	9.934974e+000	0	0	0	0	0	0	309.774	1	1	57.5363	40.5
DATA	2457	29	77	0	0	A_44_P529811	NM_001107657	2368.64	381.507	1.617486e+001	4.276256e+000	78	38.5	8.239301e+000	0	0	0	0	0	0	13.1469	1	0	46.5243	39.2813
DATA	2458	29	78	0	0	A_64_P104640	A_64_P104640	2394.19	381.974	1.340786e+004	1.340791e+003	11133	39	8.084376e+000	0	0	0	0	0	0	10871.3	1	1	49.1849	40
DATA	2459	29	79	0	0	A_64_P003234	NM_001109048	2419.5	382	2.993904e+001	4.977833e+000	89	38	8.658260e+000	0	0	0	0	0	0	24.2225	1	1	54.1152	40.0811
DATA	2460	29	80	0	0	A_64_P097158	NM_001000875	2445	382	4.000076e+000	3.984144e+000	59	42	8.160223e+000	0	0	0	0	0	0	-4.82667	0	0	54.9904	41.4516
DATA	2461	29	81	0	0	A_64_P141814	NM_001134629	2470.3	381.9	1.155386e+002	1.222340e+001	157	41	7.192906e+000	0	0	0	0	0	0	93.1707	1	1	47.2035	40.7407
DATA	2462	29	82	0	0	A_42_P463602	NM_001107592	2495.47	382.221	4.009884e+000	3.993912e+000	62	38	8.703828e+000	0	0	0	0	0	0	-1.9035	0	0	46.8651	38.1429
DATA	2463	29	83	0	0	A_64_P083366	NM_001077643	2521.06	382.024	8.477520e+003	8.477615e+002	6901	40	6.896693e+000	0	0	0	0	0	0	6825.05	1	1	50.7771	40.7667
DATA	2464	29	84	0	0	A_44_P121039	NM_172008	2546.5	382	3.487151e+002	3.509985e+001	345	43	8.786720e+000	0	0	0	0	0	0	280.694	1	1	54.1152	42.1613
DATA	2465	29	85	66	1	DarkCorner	DarkCorner	2571.77	381.508	4.012250e+000	3.996269e+000	59	36	6.848874e+000	0	0	0	0	0	0	-3.65451	0	0	45.4864	36.9556
DATA	2466	30	1	66	1	DarkCorner	DarkCorner	451.582	387.573	3.642266e+000	3.632350e+000	61	39	9.697287e+000	0	0	0	0	0	0	1.61924	0	0	57.5363	40.6889
DATA	2467	30	2	0	0	A_42_P687443	NM_020100	477	387.545	7.911820e+001	8.698349e+000	131.5	39	8.613568e+000	0	0	0	0	0	0	70.4292	1	1	55.8519	40.25
DATA	2468	30	3	0	0	A_42_P563382	ENSRNOT00000055321	502.413	387.6	1.282007e+003	1.282513e+002	1215.5	39	7.649999e+000	0	0	0	0	0	0	1145.45	1	1	49.5074	40.8214
DATA	2469	30	4	0	0	A_42_P667100	NM_001013932	527.274	387.932	8.644566e+002	8.652009e+001	836.5	40	9.872735e+000	0	0	0	0	0	0	775.232	1	1	48.2044	40.2857
DATA	2470	30	5	0	0	A_42_P553319	TC597248	552.76	387.613	6.138308e+001	7.103357e+000	116	33	6.244998e+000	0	0	0	0	0	0	55.2488	1	1	49.1849	33.8
DATA	2471	30	6	0	0	A_64_P151358	NM_181695	578.5	387.648	2.318480e+001	4.249615e+000	83	31	7.038909e+000	0	0	0	0	1	0	20.9458	1	1	57.5363	32.2903
DATA	2472	30	7	0	0	A_44_P196743	ENSRNOT00000007795	604	387.545	3.562712e+000	3.548521e+000	56.5	35	7.847608e+000	0	0	0	0	0	0	-5.20106	0	0	55.8519	36.4194
DATA	2474	30	9	0	0	A_64_P127111	NM_001106004	654.507	387.87	6.559599e+003	6.559694e+002	5901.5	38	7.683858e+000	0	0	0	0	0	0	5990.23	1	1	47.2035	36.4583
DATA	2475	30	10	0	0	A_42_P470775	NM_001025126	679.838	387.897	1.166587e+003	1.167115e+002	1094	34	5.458938e+000	0	0	0	0	0	0	1069	1	1	46.5243	34.5
DATA	2476	30	11	0	0	A_44_P472855	NM_001000961	705.25	388.029	9.450261e+001	1.007736e+001	145	35.5	5.667717e+000	0	0	0	0	0	0	86.8904	1	1	46.1809	34.6389
DATA	2477	30	12	0	0	A_64_P080682	NM_001109652	730.907	387.935	9.612456e+000	3.617979e+000	71	37.5	6.752013e+000	0	0	0	0	0	0	8.86717	1	0	54.4085	36.3056
DATA	2478	30	13	0	0	A_42_P727368	NM_001025693	756.342	387.808	4.708794e+001	5.853426e+000	108	38.5	6.549950e+000	0	0	0	0	0	0	43.5732	1	1	48.2044	39.2632
DATA	2479	30	14	0	0	A_64_P034427	A_64_P034427	781.076	387.985	1.898888e+003	1.899204e+002	1814	41.5	9.335805e+000	0	0	0	0	0	0	1762.38	1	1	46.8651	40.9375
DATA	2480	30	15	0	0	A_64_P042871	A_64_P042871	807.093	387.935	3.796753e+002	3.812454e+001	428	41	8.311665e+000	0	0	0	0	0	0	353.423	1	1	54.4085	41.3529
DATA	2481	30	16	0	0	A_64_P152617	NM_001105747	832.042	387.761	6.261867e+000	3.503682e+000	68	38	6.996764e+000	0	0	0	0	0	0	5.84452	1	0	46.8651	38.1429
DATA	2482	30	17	0	0	A_44_P468879	NM_001007798	857.608	387.931	9.556983e+000	3.568543e+000	72	37	5.455156e+000	0	0	0	0	0	0	8.94358	1	0	65	37.1111
DATA	2483	30	18	0	0	A_44_P252976	NM_001012071	883.5	388	1.330675e+002	1.374161e+001	188.5	38	6.233125e+000	0	0	0	0	0	0	124.838	1	1	65	38.5
DATA	2484	30	19	0	0	A_64_P014080	NM_022189	908.5	388	1.437416e+001	3.711613e+000	77.5	38.5	8.186406e+000	0	0	0	0	0	0	13.5153	1	0	54.1152	40.5
DATA	2485	30	20	0	0	A_44_P204789	NM_001025684	934	388	4.799134e+002	4.811267e+001	508	41	5.823309e+000	0	0	0	0	0	0	452.189	1	1	54.9904	40.8286
DATA	2486	30	21	0	0	A_64_P030373	NM_001127319	959.5	388	3.633724e+001	4.981964e+000	97	41	1.167141e+001	0	0	0	0	0	0	34.3039	1	1	54.1152	41.6875
DATA	2487	30	22	0	0	A_42_P558703	NM_001106810	984.408	388.056	1.995309e+002	2.024110e+001	252.5	44	1.021225e+001	0	0	0	0	0	0	188.686	1	1	48.2044	42.96
DATA	2488	30	23	0	0	A_44_P241190	NM_001013199	1009.85	388.136	5.388650e+002	5.399348e+001	577	41	8.155835e+000	0	0	0	0	0	0	510.366	1	1	46.1809	41.2
DATA	2489	30	24	0	0	A_42_P539095	XM_001081794	1035.21	387.836	7.132722e+002	7.140786e+001	747	42.5	9.716847e+000	0	0	0	0	0	0	676.428	1	1	46.1809	43.6471
DATA	2490	30	25	0	0	A_64_P010905	ENSRNOT00000057216	1061.09	388.386	8.727465e+001	9.362243e+000	143	41	1.227052e+001	0	0	0	0	0	0	82.867	1	1	57.259	44.0323
DATA	2491	30	26	0	0	A_44_P500660	NM_001007645	1085.96	388.316	2.282999e+002	2.307967e+001	282	42	6.782330e+000	0	0	0	0	0	0	216.964	1	1	49.1849	42.5
DATA	2492	30	27	0	0	A_64_P056436	A_64_P056436	1111.58	388.427	1.573711e+002	1.609666e+001	208	39.5	7.607588e+000	0	0	0	0	0	0	149.667	1	1	57.5363	40.3056
DATA	2493	30	28	0	0	A_42_P773816	NM_017079	1136.84	387.797	8.888020e+001	9.509615e+000	145	40	8.839074e+000	0	0	0	0	0	0	84.565	1	1	45.4864	39.1471
DATA	2494	30	29	0	0	A_64_P138604	NM_001009967	1162.58	388.427	3.614841e+004	3.614843e+003	34139	37.5	9.772749e+000	0	0	0	0	0	0	34405.5	1	1	57.5363	37.8929
DATA	2495	30	30	0	0	A_42_P705302	NM_001107361	1187.6	388.151	5.052196e+003	5.052309e+002	4730	38	9.955401e+000	0	0	0	0	0	0	4808.74	1	1	48.5334	39.12
DATA	2496	30	31	0	0	A_64_P027259	NM_001191656	1213.35	388.136	1.849300e+004	1.849303e+003	17936	42	1.061629e+001	0	0	0	0	0	0	17599	1	1	50.4627	42.0625
DATA	2497	30	32	0	0	A_44_P288333	ENSRNOT00000006659	1238.79	387.77	1.913295e+002	1.942962e+001	243.5	39	1.040141e+001	0	0	0	0	0	0	182.003	1	1	45.1352	40.4242
DATA	2498	30	33	0	0	A_42_P618217	NM_130752	1264.12	388.179	3.725281e+001	5.032998e+000	99	37	7.631536e+000	0	0	0	0	0	0	35.4171	1	1	46.1809	37.6286
DATA	2499	30	34	0	0	A_64_P151587	A_64_P151587	1289.58	388.427	3.400542e+000	3.391254e+000	66	37	4.731500e+000	0	0	0	0	0	0	1.61369	0	0	57.5363	37
DATA	2500	30	35	0	0	A_42_P771107	NM_001108217	1314.89	388.5	3.797928e+002	3.813032e+001	418.5	38	6.309156e+000	0	0	0	0	0	0	360.414	1	1	56.9804	38.4688
DATA	2501	30	36	0	0	A_42_P689013	NM_053800	1340.04	388.347	7.975412e+003	7.975485e+002	7403	41	6.635403e+000	0	0	0	0	0	0	7558.88	1	1	48.5334	38.9714
DATA	2502	30	37	0	0	A_64_P155334	NM_001100945	1365.36	388.137	1.720502e+003	1.720838e+002	1681	37	7.433967e+000	0	0	0	0	0	0	1628.2	1	1	48.5334	37.0286
DATA	2503	30	38	0	0	A_64_P049007	A_64_P049007	1390.77	388.233	2.585893e+001	4.276141e+000	88	40	7.360113e+000	0	0	0	0	0	0	24.4303	1	1	43.7019	40.6333
DATA	2504	30	39	0	0	A_44_P351461	ENSRNOT00000027179	1416.5	388.5	2.523560e+001	4.243974e+000	88	44	1.356865e+001	0	0	0	0	0	0	23.7959	1	1	57.5363	45.5862
DATA	2505	30	40	0	0	A_44_P604267	NM_022933	1441.67	388.132	2.996913e+002	3.016359e+001	339	40.5	6.348138e+000	0	0	0	0	0	0	281.989	1	1	49.5074	38.3333
DATA	2506	30	41	0	0	A_64_P070475	XM_001061514	1467.33	388.5	3.441135e+000	3.433908e+000	68	37.5	6.367445e+000	0	0	0	0	0	0	1.97938	0	0	57.5363	37.6875
DATA	2507	30	42	0	0	A_64_P119963	A_64_P119963	1492.5	388.5	1.413711e+003	1.414129e+002	1399	36	6.351799e+000	0	0	0	0	0	0	1323.8	1	1	52.9257	34.6486
DATA	2508	30	43	0	0	A_42_P658562	NM_001134416	1518.11	388.5	2.325931e+002	2.351313e+001	278.5	38	7.020028e+000	0	0	0	0	0	0	217.202	1	1	56.9804	38.931
DATA	2509	30	44	0	0	A_64_P116830	A_64_P116830	1543.5	388.5	9.517918e+001	1.012580e+001	153	39	7.371888e+000	0	0	0	0	0	0	88.622	1	1	57.5363	39.037
DATA	2510	30	45	0	0	A_64_P048531	ENSRNOT00000019473	1568.66	388.324	8.077537e+001	8.789868e+000	139.5	41	9.896779e+000	0	0	0	0	0	0	74.9781	1	1	48.2044	42.2903
DATA	2511	30	46	0	0	A_64_P122716	NM_139331	1594.42	388.573	4.323524e+000	3.504532e+000	69	40.5	8.974858e+000	0	0	0	0	0	0	3.99999	1	0	57.5363	41.625
DATA	2512	30	47	0	0	A_64_P077323	NM_201992	1619.58	388.573	7.324852e+000	3.565734e+000	71.5	42.5	6.978804e+000	0	0	0	0	0	0	6.75356	1	0	57.5363	43.5
DATA	2513	30	48	0	0	A_42_P569711	NM_001108977	1644.43	388.627	1.354940e+002	1.399466e+001	193	42	8.998208e+000	0	0	0	0	0	0	124.486	1	1	49.1849	41.5
DATA	2514	30	49	0	0	A_42_P474100	NM_001191820	1669.94	388.768	3.315233e+003	3.315419e+002	3010.5	42	8.099922e+000	0	0	0	0	0	0	3034.41	1	1	46.5243	41.8611
DATA	2515	30	50	0	0	A_64_P026404	A_64_P026404	1695.58	388.573	3.543407e+000	3.529293e+000	58	40.5	8.099930e+000	0	0	0	0	0	0	-4.07247	0	0	65	42.4375
DATA	2516	30	51	0	0	A_64_P026581	ENSRNOT00000029099	1720.74	388.778	3.429142e+003	3.429325e+002	3079	43	1.233696e+001	0	0	0	0	0	0	3113.74	1	1	47.5395	42.8438
DATA	2517	30	52	0	0	A_64_P043624	NM_133565	1746.23	388.788	1.810634e+003	1.810983e+002	1699.5	37	9.162671e+000	0	0	0	0	0	0	1637.21	1	1	45.835	39.2727
DATA	2518	30	53	0	0	A_44_P417429	NM_001011983	1772	388.545	9.461080e+002	9.467829e+001	878.5	39	7.250139e+000	0	0	0	0	0	0	851.736	1	1	55.8519	38.375
DATA	2519	30	54	0	0	A_64_P007574	ENSRNOT00000028681	1797.07	388.732	1.366976e+004	1.366981e+003	11817	40.5	9.403961e+000	0	0	0	0	0	0	12253	1	1	47.5395	41.2188
DATA	2520	30	55	0	0	A_42_P529690	NM_001173510	1822.5	388.711	1.197790e+004	1.197796e+003	10478.5	39	1.004766e+001	0	0	0	0	0	0	10688.1	1	1	49.1849	41.3462
DATA	2521	30	56	0	0	A_42_P505070	TC624062	1847.69	388.662	3.259318e+003	3.259520e+002	2816.5	39	7.849289e+000	0	0	0	1	0	0	2895.13	1	1	48.5334	40.6154
DATA	2522	30	57	0	0	A_42_P504653	NM_017143	1873.33	389.071	9.669245e+001	1.033140e+001	150	44.5	4.584925e+000	0	0	0	0	0	0	85.4892	1	1	46.8651	45.3077
DATA	2523	30	58	0	0	A_64_P017891	A_64_P017891	1898.91	388.614	7.057988e+000	3.724202e+000	71	42	1.015376e+001	0	0	0	0	0	0	6.21027	1	0	57.259	42.7333
DATA	2524	30	59	0	0	A_42_P642724	NM_001107585	1924.17	389	1.900359e+003	1.900714e+002	1688	42	8.927182e+000	0	0	0	0	0	0	1664.28	1	1	46.8651	40.8621
DATA	2525	30	60	0	0	A_42_P780943	NM_001011906	1949.5	389	4.998982e+002	5.012594e+001	514	39	8.347823e+000	0	0	0	0	0	0	435.709	1	1	54.1152	39.6154
DATA	2526	30	61	0	0	A_44_P482325	NM_145669	1974.73	388.775	4.854660e+002	4.868810e+001	478	43	8.786231e+000	0	0	0	0	0	0	421.1	1	1	47.2035	44.7419
DATA	2527	30	62	0	0	A_42_P716750	NM_001024757	2000.12	388.652	2.233451e+002	2.264339e+001	261	44.5	1.003741e+001	0	0	0	0	0	0	192.8	1	1	45.835	44.9118
DATA	2528	30	63	0	0	A_64_P009565	NM_001191823	2026	389	7.825959e+001	8.676024e+000	130	44.5	1.317742e+001	0	0	0	0	0	0	67.2301	1	1	54.9904	46.8889
DATA	2529	30	64	0	0	A_42_P495969	NM_012824	2051.22	388.866	4.785644e+003	4.785792e+002	4194.5	45.5	1.068603e+001	0	0	0	1	0	0	4091.69	1	1	46.1809	45.3947
DATA	2530	30	65	0	0	A_64_P154671	ENSRNOT00000024704	2076.66	388.986	8.249356e+001	9.074561e+000	138	40	6.687427e+000	0	0	0	0	0	0	70.1999	1	1	49.1849	41.3103
DATA	2531	30	66	0	0	A_44_P111337	NM_001108724	2101.88	389.095	1.241688e+003	1.242268e+002	1093	38	7.075476e+000	0	0	0	0	0	0	1051.79	1	1	47.5395	39.0645
DATA	2532	30	67	0	0	A_42_P665627	NM_023095	2127.52	388.985	7.316214e+001	8.251625e+000	128	40	7.558677e+000	0	0	0	0	0	0	61.6867	1	1	44.4243	40.1538
DATA	2533	30	68	0	0	A_44_P447585	NM_001166676	2153.57	389.523	1.415110e+001	4.086178e+000	76	40	7.945378e+000	0	0	0	0	0	0	11.8778	1	0	44.7812	40.0645
DATA	2534	30	69	0	0	A_42_P463754	NM_030994	2178.64	388.92	3.066308e+002	3.090385e+001	315	42	8.970391e+000	0	0	0	0	0	0	256.249	1	1	49.1849	41.6765
DATA	2535	30	70	0	0	A_42_P644717	NM_001108927	2203.5	389	6.317132e+000	3.917248e+000	69.5	35.5	1.267299e+001	0	0	0	0	0	0	5.25752	1	0	54.1152	39.7308
DATA	2536	30	71	0	0	A_42_P546539	NM_001135801	2228.93	388.725	4.032232e+002	4.050874e+001	398	39	9.638670e+000	0	0	0	1	0	0	334.217	1	1	46.1809	39.6944
DATA	2537	30	72	0	0	A_42_P818297	XM_001073988	2254.09	388.672	9.165962e+002	9.174242e+001	815.5	40	7.083830e+000	0	0	0	0	0	0	756.816	1	1	45.1352	40.2258
DATA	2538	30	73	0	0	A_64_P047416	NM_001109501	2279.55	389.127	1.862712e+002	1.903326e+001	215	39	7.908674e+000	0	0	0	0	0	0	153.245	1	1	47.8731	38.9333
DATA	2539	30	74	0	0	A_43_P18389	XM_002726292	2305.42	389.427	1.431961e+001	4.177598e+000	74	39.5	8.432386e+000	0	0	0	0	0	0	11.7399	1	0	57.5363	40.85
DATA	2540	30	75	0	0	A_64_P044276	NM_001105946	2330.53	389.278	1.949870e+003	1.950267e+002	1610	43	9.194398e+000	0	0	0	0	0	0	1593.51	1	1	48.2044	41.5862
DATA	2541	30	76	0	0	A_64_P059475	ENSRNOT00000029976	2356	389.455	3.964347e+000	3.948557e+000	59	41.5	7.161445e+000	0	0	0	0	0	0	-2.92297	0	0	55.8519	40.4375
DATA	2542	30	77	0	0	A_64_P005496	A_64_P005496	2381.42	389.427	3.974875e+000	3.968094e+000	64	41	7.981924e+000	0	0	0	0	0	0	2.17698	0	0	57.5363	40.9444
DATA	2544	30	79	0	0	A_42_P739860	NM_133578	2432.12	389.52	1.205197e+003	1.205853e+002	1001	40	8.784823e+000	0	0	0	0	0	0	975.257	1	1	48.8603	40.9429
DATA	2545	30	80	0	0	A_42_P681251	NM_030844	2457.51	389.37	2.006933e+003	2.007328e+002	1704	40.5	8.350127e+000	0	0	0	0	0	0	1621.35	1	1	48.5334	40.7308
DATA	2546	30	81	0	0	A_42_P567793	NM_001107668	2482.62	389.447	1.636364e+003	1.636850e+002	1345	39	7.734770e+000	0	0	0	0	0	0	1320.36	1	1	49.8279	37.08
DATA	2547	30	82	0	0	A_64_P041662	NM_182843	2508.25	389.584	2.521511e+002	2.552897e+001	265	38	8.222461e+000	0	0	0	0	0	0	203.291	1	1	49.5074	40.0625
DATA	2548	30	83	0	0	A_42_P534679	NM_001134974	2533.43	389.568	1.326044e+003	1.326645e+002	1121	43	6.668162e+000	0	0	0	0	0	0	1068.68	1	1	51.0895	44.1852
DATA	2549	30	84	66	1	DarkCorner	DarkCorner	2558.25	390.083	4.007751e+000	3.991788e+000	57	38	7.261622e+000	0	0	0	0	0	0	-7.73351	0	0	47.8731	38.8421
DATA	2550	30	85	66	1	DarkCorner	DarkCorner	2584.21	389.724	4.005672e+000	3.989718e+000	58	35	7.682521e+000	0	0	0	0	0	0	-4.35757	0	0	42.9674	34.7953
DATA	2551	31	1	66	1	DarkCorner	DarkCorner	437.746	394.952	8.740183e+000	3.733276e+000	70	51	1.384145e+001	0	0	0	0	0	0	7.74803	1	0	45.4864	51.7378
DATA	2552	31	2	0	0	A_42_P576549	NM_001106490	463.647	394.941	1.457239e+001	3.898773e+000	75	44.5	8.238143e+000	0	0	0	0	0	0	12.9658	1	0	46.1809	44.6053
DATA	2553	31	3	0	0	A_42_P542638	NM_001012202	489.368	395.015	3.442423e+002	3.461225e+001	365	38	8.017786e+000	0	0	0	0	0	0	307.426	1	1	46.1809	39.1481
DATA	2554	31	4	0	0	A_42_P765736	NM_001025670	514.525	395.186	3.010916e+001	4.685226e+000	88	39	9.304136e+000	0	0	0	0	0	0	26.9876	1	1	42.9674	40.4815
DATA	2555	31	5	0	0	A_44_P372461	NM_001170708	540.3	394.9	4.811018e+002	4.824294e+001	488	34	7.251103e+000	0	0	0	0	0	0	432.807	1	1	47.2035	34.3871
DATA	2556	31	6	0	0	A_64_P070554	XM_001059856	565.5	395	3.212641e+001	4.797908e+000	92	33	8.653217e+000	0	0	0	0	0	0	29.0068	1	1	54.1152	35.1333
DATA	2557	31	7	0	0	A_64_P030859	ENSRNOT00000045252	591.09	395.104	7.723300e+003	7.723381e+002	7038	33.5	7.940586e+000	0	0	0	0	0	0	6998.96	1	1	46.8651	35.3571
DATA	2558	31	8	0	0	A_64_P079260	NM_001005546	616.5	395	4.415505e+002	4.429656e+001	449.5	32	7.229012e+000	0	0	0	0	1	0	401.568	1	1	48.5334	32.5172
DATA	2559	31	9	0	0	A_64_P149846	A_64_P149846	642.09	395.104	7.533034e+003	7.533117e+002	7084	35	6.344289e+000	0	0	0	0	0	0	6875.39	1	1	46.8651	35.8
DATA	2560	31	10	0	0	A_64_P120624	NM_031634	667.315	395.093	4.915612e+000	3.547432e+000	66	35.5	7.108534e+000	0	0	0	0	0	0	4.50188	1	0	41.4593	36.2813
DATA	2561	31	11	0	0	A_64_P158020	NM_001008909	692.636	395.333	3.368174e+001	4.858354e+000	94	35	6.018609e+000	0	0	0	0	0	0	30.9519	1	1	45.835	35.9032
DATA	2562	31	12	0	0	A_64_P116606	NM_153724	718.147	395.187	5.063242e+001	6.149429e+000	108	35	7.757979e+000	0	0	0	0	0	0	46.6812	1	1	48.2044	34.8462
DATA	2563	31	13	0	0	A_44_P532436	ENSRNOT00000006946	743.222	394.984	1.150682e+001	3.664385e+000	71	39	6.444835e+000	0	0	0	0	0	0	10.6419	1	0	45.4864	38.55
DATA	2564	31	14	0	0	A_64_P027545	NM_023095	769	395.455	1.245532e+002	1.292912e+001	176.5	41	1.064466e+001	0	0	0	0	0	0	115.557	1	1	55.8519	40.0606
DATA	2565	31	15	0	0	A_64_P076705	NM_017088	794.418	395.427	7.092252e+004	7.092252e+003	65297.5	41	8.741671e+000	0	0	0	0	0	0	65992.8	1	1	57.5363	40.6286
DATA	2566	31	16	0	0	A_44_P238642	NM_001127201	819.646	394.862	2.498701e+003	2.498939e+002	2356	39	7.426575e+000	0	0	0	0	0	0	2331.31	1	1	45.4864	38.5333
DATA	2567	31	17	0	0	A_64_P037249	NM_001105802	845.418	395.427	3.250918e+001	4.732366e+000	93	36	6.270009e+000	0	0	0	0	0	0	30.4153	1	1	57.5363	36.8333
DATA	2568	31	18	0	0	A_64_P061524	NM_172064	870.481	395.557	2.685499e+002	2.707321e+001	311	38	5.308690e+000	0	0	0	0	0	0	251.877	1	1	50.4627	37.7692
DATA	2569	31	19	0	0	A_42_P536564	NM_001008344	895.438	395.462	1.773118e+003	1.773448e+002	1686	39	5.922801e+000	0	0	0	0	0	0	1666.84	1	1	50.4627	39.7097
DATA	2570	31	20	0	0	A_64_P062433	NM_001135804	921.257	395.581	4.223367e+002	4.237152e+001	463	40.5	7.471002e+000	0	0	0	0	0	0	397.903	1	1	48.8603	41.1111
DATA	2571	31	21	0	0	A_42_P665509	NM_053777	946.582	395.427	3.033385e+004	3.033387e+003	28046	41	7.844319e+000	0	0	0	0	0	0	28635.1	1	1	57.5363	41
DATA	2572	31	22	0	0	A_44_P250144	NM_001001373	972.333	395.5	3.415738e+000	3.404109e+000	64	43	1.282280e+001	0	0	0	0	0	0	1.097	0	0	65	42.7
DATA	2573	31	23	0	0	A_42_P746838	NM_001024286	997.145	395.464	7.627456e+000	3.481367e+000	68	41	8.318034e+000	0	0	0	0	0	0	7.22491	1	0	47.5395	40.3056
DATA	2574	31	24	0	0	A_44_P210852	NM_001034187	1022.89	395.5	3.418076e+001	4.815401e+000	98	40	8.917543e+000	0	0	0	0	0	0	32.4236	1	1	56.9804	41.5484
DATA	2575	31	25	0	0	A_64_P019390	A_64_P019390	1048.42	395.427	2.155053e+001	4.015115e+000	84	42.5	1.133632e+001	0	0	0	0	0	0	20.4676	1	1	57.5363	45.5625
DATA	2576	31	26	0	0	A_64_P134709	NM_001105760	1073.47	394.959	7.025000e+001	7.797805e+000	132.5	44	9.515978e+000	0	0	0	0	0	0	66.7831	1	1	48.5334	42.0769
DATA	2578	31	28	0	0	A_64_P028117	NM_001000372	1124.5	395.5	1.802987e+001	3.830444e+000	83	40	9.704117e+000	0	0	0	0	0	0	17.1653	1	1	65	40.3548
DATA	2579	31	29	0	0	A_44_P391517	NM_001034144	1149.89	395.5	1.641407e+002	1.675812e+001	227	40	8.439439e+000	0	0	0	0	0	0	156.329	1	1	56.9804	38.5
DATA	2580	31	30	0	0	A_42_P743682	NM_133599	1175.42	395.573	2.401659e+001	4.144511e+000	89	37	1.014889e+001	0	0	0	0	0	0	22.8775	1	1	57.5363	38.2
DATA	2581	31	31	0	0	A_64_P163075	NM_001109321	1200.58	395.573	7.634720e+000	3.463120e+000	71	42.5	1.099032e+001	0	0	0	0	0	0	7.27218	1	0	57.5363	42.75
DATA	2582	31	32	0	0	A_44_P393422	NM_001013188	1226.11	395.5	9.330024e+002	9.336140e+001	935.5	38	8.429058e+000	0	0	0	0	0	0	888.444	1	1	56.9804	38.7353
DATA	2583	31	33	0	0	A_44_P288982	NM_001107913	1251.5	395.5	5.037456e+001	6.066646e+000	111.5	38.5	9.265870e+000	0	0	0	0	0	0	47.9449	1	1	57.5363	39.5278
DATA	2584	31	34	0	0	A_64_P009788	NM_001191099	1276.67	395.5	1.896373e+001	3.878240e+000	82.5	36	3.608316e+000	0	0	0	0	0	0	18.0362	1	1	57.5363	35.4074
DATA	2585	31	35	0	0	A_42_P764228	NM_031707	1302.06	395.611	2.380474e+003	2.380715e+002	2341.5	37	6.852645e+000	0	0	0	0	0	0	2261.95	1	1	48.2044	38.5263
DATA	2586	31	36	0	0	A_64_P161621	NM_001101015	1327.57	395.611	1.848649e+002	1.879475e+001	246.5	42	7.150048e+000	0	0	0	0	0	0	175.456	1	1	48.2044	40.5833
DATA	2587	31	37	0	0	A_42_P763522	NM_001013980	1352.69	395.203	1.557430e+003	1.557800e+002	1513	37.5	7.485976e+000	0	0	0	0	0	0	1476.09	1	1	49.1849	37.4737
DATA	2588	31	38	0	0	A_64_P029935	NM_001109299	1378.44	395.521	4.965737e+002	4.977365e+001	543	37	6.873416e+000	0	0	0	0	0	0	469.895	1	1	48.2044	36.3793
DATA	2589	31	39	0	0	A_64_P045053	A_64_P045053	1403.79	395.243	2.358900e+002	2.383369e+001	283.5	46	1.435793e+001	0	0	0	0	0	0	222.808	1	1	46.8651	47.8261
DATA	2590	31	40	0	0	A_42_P540920	NM_001135045	1428.94	395.614	1.600004e+003	1.600368e+002	1515	36.5	7.410400e+000	0	0	0	0	0	0	1508.31	1	1	47.2035	37.1071
DATA	2591	31	41	0	0	A_64_P055323	NM_001191930	1454.58	395.573	1.883416e+002	1.914230e+001	238	38	6.995698e+000	0	0	0	0	0	0	177.149	1	1	57.5363	37.1613
DATA	2592	31	42	0	0	A_64_P047162	NM_153472	1479.48	395.648	2.751540e+003	2.751754e+002	2590	38	6.708129e+000	0	0	0	0	0	0	2581.89	1	1	47.8731	36.0313
DATA	2593	31	43	0	0	A_64_P279594	NM_001170476	1505.5	395.648	5.563714e+000	3.482900e+000	68.5	38	6.952899e+000	0	0	0	0	0	0	5.20664	1	0	57.5363	37.0303
DATA	2594	31	44	0	0	A_42_P665509	NM_053777	1530.58	395.573	3.077652e+004	3.077654e+003	28285.5	41	7.123218e+000	0	0	0	0	0	0	28720.9	1	1	57.5363	40.4667
DATA	2595	31	45	0	0	A_64_P106638	NM_001108198	1556.42	395.573	3.129643e+001	4.664222e+000	92	43	6.200588e+000	0	0	0	0	0	0	29.1168	1	1	65	41.2963
DATA	2596	31	46	0	0	A_64_P141245	NM_001105920	1581.07	395.8	9.256702e+002	9.263200e+001	891.5	40.5	9.422864e+000	0	0	0	0	0	0	858.561	1	1	46.8651	42.119
DATA	2597	31	47	0	0	A_42_P503739	FQ231471	1606.3	395.9	8.088067e+003	8.088141e+002	7265	40.5	7.326212e+000	0	0	0	0	0	0	7476.78	1	1	47.2035	40.0625
DATA	2598	31	48	0	0	A_44_P282433	NM_033230	1632.5	396	4.160440e+002	4.175080e+001	466	42	8.699639e+000	0	0	0	0	0	0	383.206	1	1	54.1152	40.9394
DATA	2599	31	49	0	0	A_42_P585750	NM_001202463	1657.31	395.627	5.954922e+000	3.556210e+000	68	41	7.681566e+000	0	0	0	0	0	0	5.46493	1	0	46.1809	39.8387
DATA	2600	31	50	0	0	A_42_P523517	FQ229104	1682.63	395.986	3.819111e+003	3.819273e+002	3408	43	9.013983e+000	0	0	0	0	0	0	3491.61	1	1	47.2035	43.2424
DATA	2601	31	51	0	0	A_64_P126190	NM_001113789	1708.5	396	1.486396e+001	3.833504e+000	76	39	8.419131e+000	0	0	0	0	0	0	13.5343	1	0	65	40.8966
DATA	2602	31	52	0	0	A_42_P549675	NM_080577	1733.32	396.081	2.642714e+003	2.642952e+002	2313	44	9.587554e+000	0	0	0	0	0	0	2396.68	1	1	48.8603	44.7241
DATA	2603	31	53	0	0	A_42_P535644	NM_024400	1758.78	395.925	2.324203e+002	2.351354e+001	275	37.5	7.522749e+000	0	0	0	0	0	0	209.885	1	1	45.835	37.9474
DATA	2604	31	54	0	0	A_64_P050233	XM_345239	1784.54	395.917	1.413473e+002	1.458074e+001	194	42.5	8.845351e+000	0	0	0	0	0	0	127.08	1	1	48.2044	42.6333
DATA	2605	31	55	0	0	A_64_P121575	NM_001013144	1810.09	396.065	3.351096e+001	4.914472e+000	95.5	41	9.667189e+000	0	0	0	0	0	0	29.9943	1	1	65	43.2727
DATA	2606	31	56	0	0	A_64_P018263	NM_012728	1835	396	2.865252e+002	2.887914e+001	324	39	7.788917e+000	0	0	0	0	0	0	255.316	1	1	46.8651	39.5429
DATA	2607	31	57	0	0	A_64_P164682	TC600307	1860.5	396	4.636714e+003	4.636856e+002	4174.5	43	5.183014e+000	0	0	0	0	0	0	4112.55	1	1	48.5334	43.6364
DATA	2608	31	58	0	0	A_44_P1045612	NM_172317	1886.07	396.014	2.317111e+002	2.345601e+001	258	43	8.591200e+000	0	0	0	0	0	0	204.551	1	1	46.8651	42.0606
DATA	2609	31	59	0	0	A_42_P529514	NM_001008308	1911.29	396.139	2.741247e+002	2.765597e+001	311	40.5	7.690095e+000	0	0	0	0	0	0	240.862	1	1	47.8731	40.2143
DATA	2610	31	60	0	0	A_44_P870348	NM_001107522	1937.09	396.386	1.158928e+002	1.215937e+001	162	43	7.970590e+000	0	0	0	0	0	0	101.341	1	1	57.259	40.303
DATA	2611	31	61	0	0	A_64_P108264	XM_223835	1962.27	395.746	5.949434e+001	7.004732e+000	115	39.5	6.779287e+000	0	0	0	0	0	0	51.7731	1	1	43.3362	40.3889
DATA	2612	31	62	0	0	A_42_P754784	CB328432	1987.38	396	4.831665e+003	4.831807e+002	4033	43.5	1.041702e+001	0	0	0	0	0	0	4184.82	1	1	48.5334	43
DATA	2613	31	63	0	0	A_64_P084525	NM_001101001	2013.09	396.086	1.148948e+003	1.149554e+002	1046	40	9.952824e+000	0	0	0	0	0	0	990.321	1	1	46.8651	43.0606
DATA	2614	31	64	0	0	A_64_P378583	NM_001099516	2038.58	396.427	3.765650e+000	3.750652e+000	65	44	1.110956e+001	0	0	0	0	0	0	-0.0448954	0	0	65	44.8788
DATA	2615	31	65	0	0	A_64_P154172	NM_001000557	2064	396.455	3.783519e+000	3.768449e+000	59.5	41	1.059698e+001	0	0	0	0	0	0	-4.86971	0	0	55.8519	44.6471
DATA	2616	31	66	0	0	A_64_P074634	NM_001024287	2089.25	396.388	1.618037e+002	1.661741e+001	201	42	8.123377e+000	0	0	0	0	0	0	137.506	1	1	46.1809	41.5484
DATA	2617	31	67	1028	1	(+)E1A_r60_a22	E1A_r60_a22	2114.6	396.395	1.632848e+002	1.676561e+001	203	41	6.657897e+000	0	0	0	0	0	0	138.129	1	1	50.7771	40.4483
DATA	2618	31	68	0	0	A_43_P12780	NM_053350	2140	396.648	6.530132e+001	7.565663e+000	119	39.5	8.995583e+000	0	0	0	0	0	0	54.9941	1	1	47.2035	40.05
DATA	2619	31	69	0	0	A_44_P442169	NM_001013034	2165.15	395.723	2.308102e+003	2.308421e+002	1957	45	1.027279e+001	0	0	0	0	0	0	1935.09	1	1	45.835	44.303
DATA	2620	31	70	0	0	A_64_P093894	A_64_P093894	2191	396.455	1.480381e+001	4.128606e+000	75	42	1.285740e+001	0	0	0	0	0	0	12.3587	1	0	55.8519	41.7931
DATA	2621	31	71	0	0	A_64_P073378	NM_001025287	2216.18	396.361	3.265808e+002	3.288657e+001	328	38.5	1.095380e+001	0	0	0	0	0	0	271.525	1	1	47.8731	40.1176
DATA	2622	31	72	0	0	A_64_P096076	A_64_P096076	2241.67	396.5	3.900751e+000	3.885214e+000	54.5	39	7.705879e+000	0	0	0	0	0	0	-9.29715	0	0	65	39.7941
DATA	2623	31	73	0	0	A_42_P471835	TC610276	2266.73	396.137	1.487191e+003	1.487702e+002	1249.5	38	6.022053e+000	0	0	0	0	0	0	1226.98	1	1	48.2044	38.8438
DATA	2624	31	74	0	0	A_42_P767737	AY724480	2292.19	396.481	2.008393e+003	2.008774e+002	1656	39	7.679863e+000	0	0	0	0	0	0	1651.17	1	1	49.8279	39.8621
DATA	2625	31	75	0	0	A_64_P016393	A_64_P016393	2317.93	396.402	2.081304e+003	2.081674e+002	1783	38	9.321082e+000	0	0	0	0	0	0	1705.35	1	1	51.0895	40.4848
DATA	2626	31	76	0	0	A_42_P803752	XM_580093	2343.43	396.825	7.255220e+000	4.004943e+000	70	40	7.435436e+000	0	0	0	0	0	0	5.9268	1	0	44.4243	40.2143
DATA	2627	31	77	0	0	A_42_P589025	NM_134363	2368.67	396.5	3.579167e+004	3.579169e+003	27960.5	42	6.678006e+000	0	0	0	0	0	0	29156.1	1	1	57.5363	41.2813
DATA	2628	31	78	0	0	A_64_P107938	NM_001000930	2394.33	396.5	3.975524e+000	3.959689e+000	61	38	9.232132e+000	0	0	0	0	0	0	-1.6727	0	0	57.5363	38.0323
DATA	2629	31	79	0	0	A_64_P088817	A_64_P088817	2419.5	396.5	2.671490e+002	2.700800e+001	276	37.5	7.413969e+000	0	0	0	0	0	0	216.614	1	1	49.1849	37.8214
DATA	2630	31	80	0	0	A_64_P000579	A_64_P000579	2444.61	396.638	9.122501e+003	9.122588e+002	7422	39	9.381678e+000	0	0	0	0	0	0	7383.79	1	1	47.5395	41.3571
DATA	2631	31	81	0	0	A_44_P570046	TC630334	2470.22	396.553	2.557309e+002	2.588110e+001	270.5	40	9.595817e+000	0	0	0	0	0	0	206.688	1	1	49.5074	40.9167
DATA	2632	31	82	0	0	A_44_P431629	NM_001106835	2495.43	396.627	6.365389e+001	7.509883e+000	116.5	38	7.083784e+000	0	0	0	0	0	0	51.3946	1	1	49.1849	38.5
DATA	2634	31	84	0	0	A_42_P485932	NM_001034927	2546.32	396.481	7.712004e+003	7.712107e+002	6114	42	7.323405e+000	0	0	0	1	0	0	6221.87	1	1	49.8279	43.0323
DATA	2635	31	85	66	1	DarkCorner	DarkCorner	2571.89	396.5	4.002708e+000	3.986765e+000	58.5	38	8.817596e+000	0	0	0	0	0	0	-3.63866	0	0	65	38.4286
DATA	2636	32	1	66	1	DarkCorner	DarkCorner	450.691	401.988	3.632244e+000	3.617777e+000	62	46	9.399804e+000	0	0	0	0	0	0	-0.327835	0	0	49.8279	46.9057
DATA	2637	32	2	0	0	A_64_P048366	ENSRNOT00000059330	476.694	402.389	1.331907e+003	1.332395e+002	1277	44	8.469928e+000	0	0	0	0	0	0	1189	1	1	48.2044	42.4444
DATA	2638	32	3	0	0	A_44_P1058980	NM_001012036	502.123	402.384	8.631495e+002	8.638962e+001	828.5	41	7.825687e+000	0	0	0	0	0	0	773.329	1	1	48.5334	41.2069
DATA	2639	32	4	0	0	A_64_P062562	ENSRNOT00000027655	527.458	402.271	5.256063e+001	6.358514e+000	108.5	35	8.825108e+000	0	0	0	0	0	0	47.2607	1	1	42.9674	37.0556
DATA	2640	32	5	0	0	A_44_P490100	ENSRNOT00000043641	553.333	402.5	1.632148e+001	3.920874e+000	78	34.5	4.455765e+000	0	0	0	0	0	0	14.7305	1	0	65	35.4231
DATA	2641	32	6	0	0	A_42_P473886	NM_001165922	578.5	402.5	1.933210e+002	1.965576e+001	243	36.5	8.234895e+000	0	0	0	0	0	0	175.1	1	1	57.5363	37.0357
DATA	2642	32	7	0	0	A_64_P393339	ENSRNOT00000057753	603.893	402.5	7.413669e+001	8.215340e+000	125	34	8.420405e+000	0	0	0	0	0	0	67.3891	1	1	56.9804	35
DATA	2643	32	8	0	0	A_44_P461154	NM_053819	629.09	402.104	1.243885e+002	1.292937e+001	176	34	6.979678e+000	0	0	0	0	0	0	113.455	1	1	46.8651	34.8182
DATA	2644	32	9	0	0	A_42_P701991	NM_001100671	654.325	402.727	1.989077e+003	1.989387e+002	1818	36	7.807475e+000	0	0	0	0	0	0	1820.67	1	1	49.8279	37.04
DATA	2645	32	10	1028	1	(+)E1A_r60_1	E1A_r60_1	680.107	402.5	3.517197e+000	3.503188e+000	61	36	8.313999e+000	0	0	0	0	0	0	-1.55477	0	0	56.9804	37.5484
DATA	2646	32	11	0	0	A_44_P541230	ENSRNOT00000010675	705.5	402.5	8.313372e+002	8.320701e+001	834.5	36	6.946190e+000	0	0	0	0	0	0	766.066	1	1	57.5363	35.5882
DATA	2647	32	12	0	0	A_64_P004593	NM_001166761	730.893	402.5	3.494421e+000	3.483371e+000	63	37	8.517457e+000	0	0	0	0	0	0	1.30671	0	0	56.9804	37.0233
DATA	2648	32	13	0	0	A_64_P018385	ENSRNOT00000063845	756.923	402.769	3.483238e+000	3.469364e+000	62	39.5	7.344580e+000	0	0	0	0	0	0	-0.00131635	0	0	45.835	39.3333
DATA	2649	32	14	0	0	A_64_P017590	NM_001000096	781.582	402.573	3.473306e+000	3.459472e+000	56	39	9.192551e+000	0	0	0	0	0	0	-4.48443	0	0	65	38.6757
DATA	2650	32	15	0	0	A_42_P810118	XM_001075984	807.107	402.5	3.643843e+002	3.660135e+001	398	40	7.284378e+000	0	0	0	0	0	0	339.865	1	1	56.9804	40.6071
DATA	2651	32	16	0	0	A_42_P772157	NM_017020	831.942	402.768	5.857585e+002	5.867680e+001	598	36	7.945839e+000	0	0	0	0	0	0	547.809	1	1	46.5243	37.3333
DATA	2652	32	17	0	0	A_42_P542809	NM_021671	857.308	403.308	3.491121e+002	3.507943e+001	384	38	6.286108e+000	0	0	0	0	0	0	327.352	1	1	45.1352	39
DATA	2653	32	18	0	0	A_42_P645352	NM_001126371	882.849	402.712	1.806182e+003	1.806506e+002	1692	38	5.422177e+000	0	0	0	0	0	0	1697.56	1	1	48.2044	37.8333
DATA	2654	32	19	0	0	A_64_P106933	NM_001130493	908.582	402.573	5.323907e+001	6.325429e+000	115	42	5.298407e+000	0	0	0	0	0	0	50.1499	1	1	65	41.1613
DATA	2655	32	20	0	0	A_42_P614175	NM_033237	934	402.545	6.469680e+002	6.478653e+001	642	40	6.468450e+000	0	0	0	0	0	0	610.684	1	1	55.8519	41.2162
DATA	2656	32	21	0	0	A_64_P147190	NM_031840	959.129	402.7	1.334924e+003	1.335357e+002	1310.5	41.5	1.078191e+001	0	0	0	0	0	0	1262.43	1	1	47.2035	41.4118
DATA	2657	32	22	0	0	A_43_P11268	NM_031762	984.452	402.767	3.666996e+003	3.667153e+002	3597	39.5	9.307730e+000	0	0	0	0	0	0	3473.76	1	1	48.8603	39.9231
DATA	2658	32	23	0	0	A_64_P022215	A_64_P022215	1010.06	403.234	9.753382e+001	1.032610e+001	161	42	1.012571e+001	0	0	0	0	0	0	92.5396	1	1	45.4864	43.5676
DATA	2659	32	24	0	0	A_64_P001080	NM_001109379	1035.5	402.648	6.440252e+001	7.276557e+000	122	43.5	1.493849e+001	0	0	0	0	0	0	61.1807	1	1	57.5363	46.0385
DATA	2660	32	25	0	0	A_42_P468662	NM_001108886	1060.75	402.553	8.215612e+002	8.222575e+001	824	43	1.215872e+001	0	0	0	0	0	0	781.313	1	1	49.5074	44.4
DATA	2661	32	26	0	0	A_42_P522285	NM_001044263	1086.08	402.628	3.271505e+002	3.288921e+001	363	41	8.675800e+000	0	0	0	0	0	0	311.406	1	1	49.8279	39.9268
DATA	2662	32	27	0	0	A_42_P478500	NM_177421	1111.58	402.573	1.014757e+005	1.014757e+004	95911	41	9.249702e+000	0	0	0	0	0	0	96658.7	1	1	57.5363	40.9032
DATA	2663	32	28	0	0	A_42_P739860	NM_133578	1136.79	402.806	1.276528e+003	1.276974e+002	1223	38.5	7.843158e+000	0	0	0	0	0	0	1216.54	1	1	47.5395	37.9688
DATA	2664	32	29	0	0	A_42_P708614	NM_001130505	1162.5	403	2.338414e+004	2.338416e+003	22386	44	4.915089e+000	0	0	0	0	0	0	22291.8	1	1	54.1152	43.6087
DATA	2665	32	30	0	0	A_64_P067000	NM_001108721	1187.73	402.781	4.739493e+002	4.751495e+001	517	40.5	9.039236e+000	0	0	0	0	0	0	451.82	1	1	48.2044	41.7727
DATA	2666	32	31	0	0	A_44_P590748	NM_001109199	1213.65	402.439	2.930129e+001	4.470105e+000	94.5	39.5	8.406225e+000	0	0	0	0	0	0	27.9272	1	1	45.1352	39.2308
DATA	2667	32	32	0	0	A_42_P742797	NM_001106761	1238.43	402.985	1.911826e+003	1.912124e+002	1846	38	8.533547e+000	0	0	0	0	0	0	1821.58	1	1	47.5395	37.9167
DATA	2668	32	33	0	0	A_42_P761277	NM_001008297	1263.72	403.095	7.698739e+002	7.706150e+001	781	35	4.489304e+000	0	0	0	0	0	0	733.096	1	1	48.8603	35
DATA	2669	32	34	0	0	A_42_P503739	FQ231471	1289.17	403	8.293228e+003	8.293297e+002	7614	36	5.330940e+000	0	0	0	0	0	0	7890.41	1	1	46.8651	36.5676
DATA	2670	32	35	0	0	A_42_P635760	ENSRNOT00000023806	1315	403.161	4.661605e+003	4.661728e+002	4420	37	6.849989e+000	0	0	0	0	0	0	4430.52	1	1	51.4001	37.2121
DATA	2671	32	36	0	0	A_64_P136337	ENSRNOT00000064588	1340.08	403.099	2.037729e+003	2.038011e+002	1960	41	8.290611e+000	0	0	0	0	0	0	1934.27	1	1	46.8651	39.3514
DATA	2672	32	37	0	0	A_64_P128316	ENSRNOT00000062007	1365.84	402.613	1.078127e+001	3.561972e+000	76	37	8.576203e+000	0	0	0	0	0	0	10.218	1	0	44.0646	37.5143
DATA	2673	32	38	0	0	A_64_P050799	A_64_P050799	1391.29	403.057	1.070256e+002	1.122980e+001	165	40	9.680709e+000	0	0	0	0	0	0	101.265	1	1	46.8651	41.129
DATA	2674	32	39	0	0	A_42_P701779	NM_001108048	1416.24	403	1.364704e+003	1.365129e+002	1313	41.5	1.453905e+001	0	0	0	0	0	0	1288.82	1	1	46.8651	45.0833
DATA	2675	32	40	0	0	A_42_P604900	NM_199117	1441.44	403.027	2.376017e+003	2.376263e+002	2216	41	5.650973e+000	0	0	0	0	0	0	2239.2	1	1	48.5334	39.1724
DATA	2676	32	41	0	0	A_44_P1060444	NM_001106644	1466.87	403.214	2.099587e+003	2.099866e+002	1965.5	38	5.945862e+000	0	0	0	0	0	0	1974.13	1	1	46.5243	39.2593
DATA	2677	32	42	0	0	A_64_P090339	NM_001000756	1492.19	403.313	2.719642e+001	4.377820e+000	90	38	6.246613e+000	0	0	0	0	0	0	25.5073	1	1	45.835	36.5429
DATA	2678	32	43	0	0	A_42_P770556	NM_033096	1517.8	403.28	4.412115e+003	4.412249e+002	3992	40	1.001318e+001	0	0	0	0	0	0	4126.75	1	1	49.1849	39.0286
DATA	2679	32	44	0	0	A_44_P606502	NM_001130502	1543.5	403.352	5.093110e+000	3.487518e+000	68	42.5	6.077658e+000	0	0	0	0	0	0	4.74972	1	0	65	41.6
DATA	2680	32	45	0	0	A_64_P372189	NM_212516	1568.58	403.427	2.492098e+004	2.492101e+003	23416	41	8.337066e+000	0	0	0	0	0	0	23170	1	1	57.5363	41.44
DATA	2681	32	46	0	0	A_42_P540518	NM_199399	1594.06	403.045	1.673428e+003	1.673788e+002	1565	41	8.576962e+000	0	0	0	0	0	0	1550.69	1	1	46.8651	42.4167
DATA	2682	32	47	0	0	A_64_P158955	ENSRNOT00000020260	1619.58	403.427	8.718038e+000	3.591488e+000	72	42	8.073320e+000	0	0	0	0	0	0	8.05105	1	0	65	41.6129
DATA	2683	32	48	0	0	A_44_P325841	NM_024130	1645.03	403.176	1.037958e+003	1.038547e+002	1004	45	7.385209e+000	0	0	0	0	0	0	955.063	1	1	46.8651	43.8148
DATA	2684	32	49	0	0	A_64_P007743	XM_001071416	1670.25	403.408	9.372965e+001	1.000855e+001	148	41	8.316436e+000	0	0	0	0	0	0	85.9247	1	1	47.5395	41.4412
DATA	2685	32	50	0	0	A_64_P136213	A_64_P136213	1695.67	403.5	3.537574e+000	3.528966e+000	68	45	7.368989e+000	0	0	0	0	0	0	1.79564	0	0	57.5363	43.0741
DATA	2686	32	51	0	0	A_43_P17392	NM_001191693	1720.93	403.507	1.584251e+003	1.584646e+002	1467	45	8.150224e+000	0	0	0	0	0	0	1440.87	1	1	48.5334	44.1154
DATA	2687	32	52	0	0	A_42_P708569	NM_001191837	1746.06	403.611	4.801474e+003	4.801606e+002	4331.5	39	8.511250e+000	0	0	0	0	0	0	4349.01	1	1	48.2044	40.8
DATA	2688	32	53	0	0	A_64_P062068	XM_002728030	1772	403.455	1.224080e+002	1.275018e+001	171	38	7.520057e+000	0	0	0	0	0	0	110.386	1	1	55.8519	38.4857
DATA	2689	32	54	0	0	A_43_P20266	NM_001106416	1797.33	403.389	1.182150e+002	1.235274e+001	171.5	41	8.350134e+000	0	0	0	0	0	0	106.138	1	1	48.2044	41.4839
DATA	2690	32	55	0	0	A_44_P248235	NM_001106048	1822.67	403.5	3.362531e+001	4.925859e+000	95	40	1.068727e+001	0	0	0	0	0	0	30.0557	1	1	57.5363	40.697
DATA	2691	32	56	0	0	A_64_P134717	NM_001101007	1848.33	403.5	6.711799e+000	3.678078e+000	72	41	6.379234e+000	0	0	0	0	0	0	5.97162	1	0	57.5363	40.8065
DATA	2692	32	57	0	0	A_44_P555005	NM_001000944	1873.5	403.5	3.183187e+001	4.830253e+000	92	45	6.580780e+000	0	0	0	0	0	0	28.1915	1	1	57.5363	44.16
DATA	2693	32	58	0	0	A_42_P832028	NM_001006978	1898.5	403.5	7.565374e+002	7.574173e+001	732	42	8.253138e+000	0	0	0	0	0	0	666.925	1	1	49.1849	40.0571
DATA	2694	32	59	0	0	A_42_P768380	NM_001100158	1924.06	403.611	3.720308e+003	3.720488e+002	3190.5	42.5	9.011870e+000	0	0	0	0	0	0	3264.06	1	1	48.2044	41.6
DATA	2695	32	60	0	0	A_42_P585530	NM_001037791	1949.43	403.605	4.771181e+002	4.785388e+001	481	38	7.434111e+000	0	0	0	0	0	0	416.613	1	1	49.5074	39.1379
DATA	2696	32	61	0	0	A_42_P717175	NM_001013428	1975.12	403.279	2.717090e+002	2.742205e+001	306	39	9.623689e+000	0	0	0	0	0	0	236.096	1	1	45.835	41
DATA	2697	32	62	0	0	A_44_P293001	NM_001047885	2000.37	403.429	1.393626e+001	3.972899e+000	75	40	7.264093e+000	0	0	0	0	0	0	12.0523	1	0	45.1352	41.7273
[truncated: 6,308,241 more chars]
