# Supplementary material for: Gene Expression in the Hippocampus in a Rat Model of Premenstrual Dysphoric Disorder After Treatment With Baixiangdan Capsules
Source: Front Psychol. 2018 Nov 13;9:2065. doi: 10.3389/fpsyg.2018.02065 (PMC6242977; doi:10.3389/fpsyg.2018.02065)
Supplement: Supplementary file 2 [file Data_Sheet_2.ZIP › Raw Data Files/4_4.txt]

TYPE	text	text	text	integer	text	float	float	text	integer	text	text	integer	integer	integer	integer	float	float	float	float	float	float	text	text	text	text	text	text	text	text	text	text	text	integer	integer	integer	text	integer	boolean
FEPARAMS	Protocol_Name	Protocol_date	Scan_ScannerName	Scan_NumChannels	Scan_Date	Scan_MicronsPerPixelX	Scan_MicronsPerPixelY	Scan_OriginalGUID	Scan_NumScanPass	Grid_Name	Grid_Date	Grid_NumSubGridRows	Grid_NumSubGridCols	Grid_NumRows	Grid_NumCols	Grid_RowSpacing	Grid_ColSpacing	Grid_OffsetX	Grid_OffsetY	Grid_NomSpotWidth	Grid_NomSpotHeight	Grid_GenomicBuild	FeatureExtractor_Barcode	FeatureExtractor_Sample	FeatureExtractor_ScanFileName	FeatureExtractor_ArrayName	FeatureExtractor_ScanFileGUID	FeatureExtractor_DesignFileName	FeatureExtractor_ExtractionTime	FeatureExtractor_UserName	FeatureExtractor_ComputerName	FeatureExtractor_Version	FeatureExtractor_IsXDRExtraction	FeatureExtractor_ColorMode	FeatureExtractor_QCReportType	DyeNorm_NormFilename	DyeNorm_NormNumProbes	Grid_IsGridFile
DATA	GE1_1100_Jul11 (Read Only)	1-Jul-2011 22:30	Agilent Technologies Scanner G2505C US10450393	1	07-11-2013 11:36:06	5	5	2b0edc4a-cb3a-4eca-830e-566ae8841b18	1	028282_D_F_20120224	24-Feb-2012 00:00	1	1	532	85	73.3235	63.5	0	36.6617	65	65	rn4:RGSCv3.4:Nov2004	1_2		M:\2013.07.11 Rat GE 1-color 4x44k(sunpeng)\\US10450393_S01.tif	US10450393_S01	6030c60e-d494-4e84-bafe-d546c781a172	028282_D_F_20120224.xml	11-Jul-2013 15:17:26	admin	KCSY01	11.0.1.1	0	0	0		0	0
*
TYPE	float	float	float	integer	integer	float	float	float	integer	float	float	float	integer	float	float	integer	integer	integer	integer	integer	float	float	float	integer	float	float	float	float	float	integer	integer	float	float	float	float	float	integer	float	float	float	float	integer	float	float	float	float	float	integer	float	float	float	float	float	float	float	integer	float	integer	float	float	float	float	integer	float	float	float	float	text	float	float	float	float	float	float	float	float	float	float	float	float	float	float	float	float	float	float	float	float	float	integer	integer	integer	integer	float	integer	text	integer	text	float	float	float	integer	boolean	float	float	boolean	float	boolean	float	boolean	float	boolean	float	boolean	float	boolean	float	boolean	float	boolean	float	boolean	float	boolean	float	boolean
STATS	gDarkOffsetAverage	gDarkOffsetMedian	gDarkOffsetStdDev	gDarkOffsetNumPts	gSaturationValue	gAvgSig2BkgeQC	gAvgSig2BkgNegCtrl	gRatioSig2BkgeQC_NegCtrl	gNumSatFeat	gLocalBGInlierNetAve	gLocalBGInlierAve	gLocalBGInlierSDev	gLocalBGInlierNum	gGlobalBGInlierAve	gGlobalBGInlierSDev	gGlobalBGInlierNum	gNumFeatureNonUnifOL	gNumPopnOL	gNumNonUnifBGOL	gNumPopnBGOL	gOffsetUsed	gGlobalFeatInlierAve	gGlobalFeatInlierSDev	gGlobalFeatInlierNum	AnyColorPrcntFeatNonUnifOL	AnyColorPrcntBGNonUnifOL	AnyColorPrcntFeatPopnOL	AnyColorPrcntBGPopnOL	TotalPrcntFeatOL	gNumNegBGSubFeat	gNonCtrlNumNegFeatBGSubSig	gSpatialDetrendRMSFit	gSpatialDetrendRMSFilteredMinusFit	gSpatialDetrendSurfaceArea	gSpatialDetrendVolume	gSpatialDetrendAveFit	gNonCtrlNumSatFeat	gNonCtrl99PrcntNetSig	gNonCtrl50PrcntNetSig	gNonCtrl1PrcntNetSig	gNonCtrlMedPrcntCVBGSubSig	gCtrleQCNumSatFeat	gCtrleQC99PrcntNetSig	gCtrleQC50PrcntNetSig	gCtrleQC1PrcntNetSig	geQCMedPrcntCVBGSubSig	geQCSig2BkgLow2	gNegCtrlNumInliers	gNegCtrlAveNetSig	gNegCtrlSDevNetSig	gNegCtrlAveBGSubSig	gNegCtrlSDevBGSubSig	gAveNumPixOLLo	gAveNumPixOLHi	gPixCVofHighSignalFeat	gNumHighSignalFeat	AddErrorEstimateGreen	TotalNumFeatures	ROIHeight	ROIWidth	CentroidDiffX	CentroidDiffY	NumFoundFeat	MaxNonUnifEdges	MaxSpotNotFoundEdges	gMultDetrendRMSFit	gMultDetrendSurfaceAverage	eQCLowSigName2	eQCOneColorLogLowSignal	eQCOneColorLogLowSignalError	eQCOneColorLogHighSignal	eQCOneColorLinFitLogLowConc	eQCOneColorLinFitLogLowSignal	eQCOneColorLinFitLogHighConc	eQCOneColorLinFitLogHighSignal	eQCOneColorLinFitSlope	eQCOneColorLinFitIntercept	eQCOneColorLinFitRSQ	eQCOneColorSpikeDetectionLimit	gNonCtrl50PrcntBGSubSig	gCtrleQC50PrcntBGSubSig	gMedPrcntCVProcSignal	geQCMedPrcntCVProcSignal	gOutlierFlagger_Auto_FeatB_Term	gOutlierFlagger_Auto_FeatC_Term	gOutlierFlagger_Auto_BgndB_Term	gOutlierFlagger_Auto_BgndC_Term	OutlierFlagger_FeatChiSq	OutlierFlagger_BgndChiSq	GriddingStatus	IsGoodGrid	NumGeneNonUnifOL	TotalNumberOfReplicatedGenes	gPercentileIntensityProcessedSignal	ExtractionStatus	QCMetricResults	gNonCtrlNumWellAboveBG	ImageDepth	AFHold	gPMTVolts	GlassThickness	gDDN	GridHasBeenOptimized	gNegCtrlSpread	Metric_IsGoodGrid	Metric_IsGoodGrid_IsInRange	Metric_AnyColorPrcntFeatNonUnifOL	Metric_AnyColorPrcntFeatNonUnifOL_IsInRange	Metric_gNegCtrlAveNetSig	Metric_gNegCtrlAveNetSig_IsInRange	Metric_gNegCtrlAveBGSubSig	Metric_gNegCtrlAveBGSubSig_IsInRange	Metric_gNegCtrlSDevBGSubSig	Metric_gNegCtrlSDevBGSubSig_IsInRange	Metric_gSpatialDetrendRMSFilteredMinusFit	Metric_gSpatialDetrendRMSFilteredMinusFit_IsInRange	Metric_gNonCntrlMedCVProcSignal	Metric_gNonCntrlMedCVProcSignal_IsInRange	Metric_gE1aMedCVProcSignal	Metric_gE1aMedCVProcSignal_IsInRange	Metric_absGE1E1aSlope	Metric_absGE1E1aSlope_IsInRange	Metric_DetectionLimit	Metric_DetectionLimit_IsInRange	Metric_gDDN	Metric_gDDN_IsInRange
DATA	7.82249	7.82249	1.82201	0	778132	1.44125	1.80784	0.79722	0	27.2789	35.1014	3.99984	44057	35.1014	3.99984	44057	4	744	26	195	7.82249	4041.5	11733.2	43506	0.00903873	0.0587518	1.6812	0.440638	0.00932901	1103	568	1.93061	2.8394	1.00124	7.01307	62.6506	0	61994.3	368.485	53.7713	5.71726	0	181.226	67.116	49.5994	-1	1.78648	146	47.7296	3.26866	-7.08026	2.74881	0.667849	0.697564	0.107633	6595	2.8394	44254	4.3319	7.61806	0.733006	0.84513	42161	0	0.0864662	0.0450274	0.999608	(+)E1A_r60_3	0	0	0	0	0	0	0	0	0	0	-1	313.257	11.2975	2.72824	-1	1064.69	92.4721	96	54.2058	1.94685	2.49769	0	1	4	30367	2725.4	1	ExtractionEvaluate	38420	20 Bit	0	354	976.117	1	0	10.8619	1	1	0.00903873	1	47.7296	0	-7.08026	1	2.74881	1	2.8394	1	2.72824	1	-1	0	0	0	-1	0	1	1
*
TYPE	integer	integer	integer	integer	integer	text	text	float	float	float	float	float	float	float	boolean	boolean	boolean	boolean	boolean	boolean	float	boolean	boolean	float	float
FEATURES	FeatureNum	Row	Col	SubTypeMask	ControlType	ProbeName	SystematicName	PositionX	PositionY	gProcessedSignal	gProcessedSigError	gMedianSignal	gBGMedianSignal	gBGPixSDev	gIsSaturated	gIsFeatNonUnifOL	gIsBGNonUnifOL	gIsFeatPopnOL	gIsBGPopnOL	IsManualFlag	gBGSubSignal	gIsPosAndSignif	gIsWellAboveBG	SpotExtentX	gBGMeanSignal
DATA	1	1	1	260	1	GE_BrightCorner	GE_BrightCorner	3590.81	187	5.119185e+004	5.119186e+003	45358	25	6.817902e+000	0	0	0	0	0	0	45349.3	1	1	52.0157	25.4446
DATA	2	1	2	66	1	DarkCorner	DarkCorner	3616.09	187.065	1.218290e+001	3.411306e+000	70	25	6.423104e+000	0	0	0	1	0	0	10.8564	1	0	54.4085	25.5785
DATA	3	1	3	66	1	DarkCorner	DarkCorner	3641.5	187	8.625026e+000	3.283376e+000	67	26	6.377476e+000	0	0	0	0	0	0	7.73022	1	0	54.1152	26.0414
DATA	4	1	4	66	1	DarkCorner	DarkCorner	3666.96	187.071	8.013148e+000	3.250560e+000	67	26	6.776099e+000	0	0	0	0	0	0	7.22246	1	0	46.8651	26.998
DATA	5	1	5	66	1	DarkCorner	DarkCorner	3692.42	187.333	3.145124e+000	3.137354e+000	61	26	6.701510e+000	0	0	0	0	0	0	1.51746	0	0	51.0895	26.6218
DATA	6	1	6	66	1	DarkCorner	DarkCorner	3717.02	187.661	5.112166e+000	3.158293e+000	61	25	6.753677e+000	0	0	0	0	0	0	4.6574	1	0	42.5954	25.6441
DATA	7	1	7	66	1	DarkCorner	DarkCorner	3743	187.455	3.112593e+000	3.105074e+000	63	26	7.275210e+000	0	0	0	0	0	0	1.54651	0	0	55.8519	26.418
DATA	8	1	8	66	1	DarkCorner	DarkCorner	3768.5	187.352	3.097217e+000	3.085162e+000	58	26	7.419140e+000	0	0	0	0	0	0	-1.55711	0	0	57.5363	26.8597
DATA	9	1	9	66	1	DarkCorner	DarkCorner	3793.58	187.427	3.082585e+000	3.083699e+000	61	26	6.373040e+000	0	0	0	0	0	0	2.62676	0	0	57.5363	26.4376
DATA	10	1	10	66	1	DarkCorner	DarkCorner	3819.52	187.19	3.068281e+000	3.058828e+000	59	25	6.529652e+000	0	0	0	0	0	0	1.14619	0	0	50.1463	25.7896
DATA	11	1	11	66	1	DarkCorner	DarkCorner	3844.58	187.427	3.054795e+000	3.050828e+000	60	26	7.348050e+000	0	0	0	0	0	0	2.05023	0	0	57.5363	26.3614
DATA	12	1	12	0	0	A_64_P076162	A_64_P076162	3870	187.455	9.194970e+001	9.681350e+000	144	25	7.344895e+000	0	0	0	0	0	0	86.1647	1	1	55.8519	25.6534
DATA	13	1	13	0	0	A_64_P002176	NM_001170551	3895.42	187.427	5.229007e+002	5.237708e+001	551	24	6.518628e+000	0	0	0	0	0	0	491.986	1	1	57.5363	24.2141
DATA	14	1	14	0	0	A_42_P664913	NM_001108400	3920.37	187.471	3.123954e+002	3.138387e+001	348	19	5.878761e+000	0	0	0	1	1	0	295.043	1	1	46.5243	19.6745
DATA	15	1	15	0	0	A_43_P13320	NM_138880	3946.33	187.5	3.006862e+000	2.995159e+000	49	18	6.359769e+000	0	0	0	1	1	0	-10.9366	0	0	57.5363	19.0551
DATA	16	1	16	0	0	A_64_P126523	A_64_P126523	3971.5	187.5	2.585885e+001	3.949243e+000	85.5	24	6.953468e+000	0	0	0	0	0	0	24.5982	1	1	57.5363	24.9609
DATA	17	1	17	0	0	A_64_P038045	XM_002730109	3997	187.455	5.092869e+001	5.898227e+000	105	25	6.251772e+000	0	0	0	0	0	0	48.6042	1	1	55.8519	24.9256
DATA	18	1	18	0	0	A_43_P11804	NM_017066	4022.33	187.443	1.350925e+004	1.350929e+003	12411.5	25	6.325912e+000	0	0	0	0	0	0	12932	1	1	47.5395	25.4388
DATA	19	1	19	0	0	A_44_P808710	XM_001069205	4047.67	187.5	3.075908e+001	4.267219e+000	87	25	6.938357e+000	0	0	0	0	0	0	29.5288	1	1	57.5363	25.425
DATA	20	1	20	0	0	A_64_P142111	NM_001100887	4073.32	187.382	6.066656e+002	6.073823e+001	651	25	7.025386e+000	0	0	0	0	0	0	583.948	1	1	46.5243	25.2286
DATA	21	1	21	0	0	A_64_P095642	A_64_P095642	4098.57	187.532	1.533109e+002	1.561095e+001	207	25	6.538739e+000	0	0	0	0	0	0	147.931	1	1	49.8279	25.1934
DATA	22	1	22	0	0	A_42_P735279	NM_001004446	4123.89	187.5	2.392838e+004	2.392840e+003	22357	26	6.729320e+000	0	0	0	0	0	0	23140	1	1	56.9804	26.595
DATA	23	1	23	0	0	A_44_P902822	XM_001063709	4149.36	187.473	4.229432e+001	5.145314e+000	101.5	26	6.921379e+000	0	0	0	0	0	0	40.9834	1	1	48.8603	25.9566
DATA	24	1	24	0	0	A_42_P563843	NM_022263	4174.67	187.5	9.461419e+000	3.074156e+000	68	26	6.927994e+000	0	0	0	0	0	0	9.18472	1	0	57.5363	26.1825
DATA	25	1	25	0	0	A_42_P610788	NM_031544	4200.25	187.627	9.136216e+003	9.136263e+002	8745	25	6.802627e+000	0	0	0	0	0	0	8883.44	1	1	49.1849	25.3308
DATA	26	1	26	0	0	A_44_P242429	NM_001134842	4225.37	187.63	3.091930e+003	3.092068e+002	2966.5	25	6.723792e+000	0	0	0	0	0	0	3010.5	1	1	48.2044	25.4187
DATA	27	1	27	0	0	A_64_P020571	NM_001031659	4250.89	187.5	3.103993e+002	3.117630e+001	355.5	26	6.965375e+000	0	0	0	0	0	0	302.574	1	1	56.9804	26.1118
DATA	28	1	28	0	0	A_42_P518462	NM_001007020	4276.46	187.614	7.383113e+003	7.383171e+002	7095.5	26	6.432409e+000	0	0	0	0	0	0	7204.01	1	1	47.5395	25.9186
DATA	29	1	29	0	0	A_42_P469751	XM_001054007	4301.5	187.944	8.366777e+002	8.371828e+001	869	26	6.252291e+000	0	0	0	0	0	0	817.018	1	1	48.5334	25.7884
DATA	30	1	30	0	0	A_44_P209459	NM_022387	4327.07	187.732	8.194780e+003	8.194832e+002	7976.5	26	6.892998e+000	0	0	0	0	0	0	8006.25	1	1	47.5395	26.5038
DATA	31	1	31	0	0	A_64_P018547	NM_001108717	4352.44	187.74	1.062394e+003	1.062791e+002	1064.5	25	6.847702e+000	0	0	0	0	0	0	1038.28	1	1	49.5074	26.1147
DATA	32	1	32	0	0	A_64_P111513	A_64_P111513	4378.37	187.575	2.686148e+001	3.956637e+000	86.5	25	6.306185e+000	0	0	0	0	0	0	26.254	1	1	48.5334	26.1912
DATA	33	1	33	0	0	A_42_P493925	NM_198785	4403.32	187.521	4.937520e+002	4.946061e+001	547.5	26	6.823029e+000	0	0	0	1	0	0	482.531	1	1	48.5334	26.2398
DATA	34	1	34	0	0	A_64_P049828	NM_012543	4428.82	187.589	1.807642e+003	1.807876e+002	1808	25	7.081917e+000	0	0	0	0	0	0	1766.02	1	1	52.6241	25.7237
DATA	35	1	35	0	0	A_64_P137927	NM_001191885	4454.06	187.583	2.368917e+002	2.386698e+001	293	25	7.012331e+000	0	0	0	0	0	0	231.316	1	1	51.4001	26.025
DATA	36	1	36	0	0	A_43_P19848	NM_001106018	4479.5	187.648	8.550872e+001	9.032452e+000	148	25	6.657412e+000	0	0	0	0	0	0	83.4356	1	1	57.5363	26.0427
DATA	37	1	37	0	0	A_44_P308673	NM_139108	4504.55	188	2.353840e+002	2.371791e+001	287	25	6.167487e+000	0	0	0	0	0	0	229.477	1	1	50.4627	25.1848
DATA	38	1	38	0	0	A_64_P004269	NM_001191660	4530.38	188	2.063761e+003	2.063967e+002	1975	25	6.602824e+000	0	0	0	0	0	0	2009.64	1	1	48.5334	25.4366
DATA	39	1	39	0	0	A_42_P543670	NM_012572	4555.54	187.882	1.228202e+002	1.262431e+001	180.5	25	6.957548e+000	0	0	0	0	0	0	119.438	1	1	49.8279	25.8863
DATA	40	1	40	0	0	A_64_P164696	TC605704	4581.15	187.972	6.344486e+000	2.992322e+000	65.5	26	6.922353e+000	0	0	0	0	0	0	6.1603	1	0	46.8651	25.9383
DATA	41	1	41	0	0	A_64_P055763	NM_001191822	4606.42	187.905	1.470538e+004	1.470541e+003	13948	26	6.664683e+000	0	0	0	0	0	0	14253.7	1	1	49.8279	25.6438
DATA	42	1	42	0	0	A_64_P068622	NM_001013056	4631.71	187.754	1.143520e+003	1.143896e+002	1149	26	6.362736e+000	0	0	0	0	0	0	1106.24	1	1	45.1352	26.0709
DATA	43	1	43	0	0	A_44_P915877	XM_001065403	4657.39	187.931	2.799477e+002	2.814886e+001	323	26	7.028174e+000	0	0	0	0	0	0	270.248	1	1	53.8203	26.4802
DATA	44	1	44	0	0	A_42_P647599	NM_024129	4682.37	187.753	4.969919e+002	4.978655e+001	514	25.5	7.090711e+000	0	0	0	1	0	0	478.672	1	1	47.8731	26.1888
DATA	45	1	45	0	0	A_42_P798776	XM_002725203	4708	188	5.844892e+003	5.844967e+002	5564	27	7.053654e+000	0	0	0	0	0	0	5615.51	1	1	51.4001	27.3415
DATA	46	1	46	0	0	A_42_P781735	NM_053319	4733.5	188	8.291050e+004	8.291050e+003	79880	27	7.123203e+000	0	0	0	0	0	0	79443	1	1	54.1152	27.0552
DATA	47	1	47	0	0	A_42_P553611	TC630296	4758.76	188	6.499617e+003	6.499685e+002	6141	26	7.067837e+000	0	0	0	0	0	0	6210.16	1	1	46.8651	26.9823
DATA	48	1	48	0	0	A_43_P12729	NM_032615	4784.14	188.183	3.637344e+003	3.637466e+002	3437.5	26	6.471196e+000	0	0	0	0	0	0	3464.97	1	1	46.8651	26.2187
DATA	49	1	49	0	0	A_42_P507072	FQ213070	4809.5	188	4.928436e+003	4.928527e+002	4682	25	6.334909e+000	0	0	0	0	0	0	4679.8	1	1	54.1152	25.4608
DATA	50	1	50	0	0	A_42_P645467	NM_001108804	4835.32	188	2.750651e+001	4.070499e+000	86	25	6.212057e+000	0	0	0	0	0	0	26.0298	1	1	49.1849	25.6818
DATA	51	1	51	0	0	A_42_P738431	NM_019175	4860.38	188	2.564339e+003	2.564515e+002	2390	26	6.732400e+000	0	0	0	0	0	0	2418.26	1	1	48.5334	26.3996
DATA	52	1	52	0	0	A_42_P712297	NM_001135583	4885.77	187.884	3.733338e+003	3.733461e+002	3445.5	26	6.513866e+000	0	0	0	0	0	0	3507.7	1	1	46.5243	26.1683
DATA	53	1	53	0	0	A_42_P657538	NM_001008362	4911.07	188.208	4.673609e+003	4.673707e+002	4145.5	26	6.846045e+000	0	0	0	0	0	0	4374.68	1	1	46.8651	26.2539
DATA	54	1	54	0	0	A_42_P515405	NM_212505	4936.5	188	3.048441e+002	3.063617e+001	350	26	7.272430e+000	0	0	0	0	0	0	284.205	1	1	54.1152	26.6411
DATA	55	1	55	0	0	A_64_P089886	NM_053476	4961.82	188.197	2.758652e+003	2.758821e+002	2466	26	6.963618e+000	0	0	0	0	0	0	2561.46	1	1	47.5395	26.7819
DATA	56	1	56	0	0	A_42_P528580	NM_001107528	4987.27	188.3	7.438890e+003	7.438953e+002	6662	26	6.880254e+000	0	0	0	0	0	0	6877.97	1	1	46.8651	26.8375
DATA	57	1	57	0	0	A_43_P14285	NM_001034145	5012.84	188.103	1.362130e+004	1.362134e+003	12401	26.5	6.983414e+000	0	0	0	0	0	0	12538.5	1	1	46.5243	26.8973
DATA	58	1	58	0	0	A_42_P616287	NM_001134555	5038.22	188	1.542540e+002	1.573352e+001	200	26	6.778942e+000	0	0	0	0	0	0	141.353	1	1	46.1809	26.3659
DATA	59	1	59	0	0	A_42_P496411	NM_001109410	5063.5	187.794	4.684497e+003	4.684600e+002	4259.5	26	6.999251e+000	0	0	0	1	0	0	4272.91	1	1	46.5243	27.1023
DATA	60	1	60	0	0	A_44_P494310	NM_001009604	5088.86	187.97	5.493949e+003	5.494038e+002	4896.5	26	6.718842e+000	0	0	0	0	0	0	4987.85	1	1	46.5243	26.9228
DATA	61	1	61	0	0	A_42_P645142	NM_019375	5114.42	188.427	5.277043e+002	5.286391e+001	536	27	7.217315e+000	0	0	0	0	0	0	476.816	1	1	57.5363	27.388
DATA	62	1	62	0	0	A_64_P042132	AABR03024196	5139.93	188.261	1.222371e+004	1.222375e+003	10978	26	7.082916e+000	0	0	0	0	0	0	10990.2	1	1	46.5243	26.4518
DATA	63	1	63	0	0	A_42_P508085	NM_001009620	5164.64	188.132	3.591371e+003	3.591511e+002	3106	26	7.178556e+000	0	0	0	0	0	0	3213.18	1	1	49.8279	26.4912
DATA	64	1	64	0	0	A_64_P051159	NM_001100684	5190.73	188.427	1.602579e+003	1.602897e+002	1457.5	26	7.263838e+000	0	0	0	0	0	0	1426.43	1	1	48.8603	26.8935
DATA	65	1	65	0	0	A_64_P124041	ENSRNOT00000019667	5215.7	188.027	8.944957e+001	9.502313e+000	137	26	6.635081e+000	0	0	0	0	0	0	79.2085	1	1	48.8603	26.6504
DATA	66	1	66	0	0	A_64_P131122	XR_086302	5241.34	188.041	1.328102e+002	1.366661e+001	178	27	6.362209e+000	0	0	0	0	0	0	116.986	1	1	49.1849	26.8184
DATA	67	1	67	0	0	A_64_P021601	NM_031737	5266.65	188.183	1.523925e+002	1.557995e+001	192	27	6.641661e+000	0	0	0	0	0	0	133.534	1	1	47.5395	26.8616
DATA	68	1	68	0	0	A_44_P776423	NM_001017386	5292.06	188.239	1.052028e+004	1.052033e+003	9070	27	7.067902e+000	0	0	0	0	0	0	9169.41	1	1	46.8651	27.3077
DATA	69	1	69	0	0	A_64_P120445	NM_080694	5317.61	188.216	5.543490e+001	6.438831e+000	108	27	7.128868e+000	0	0	0	0	0	0	48.0556	1	1	49.1849	27.1015
DATA	70	1	70	0	0	A_42_P772878	NM_001011936	5342.74	188.5	3.376030e+003	3.376191e+002	2737	27	6.887556e+000	0	0	0	1	0	0	2911.18	1	1	50.4627	27.3138
DATA	71	1	71	0	0	A_42_P736315	NM_001108321	5368.32	188.479	1.441967e+003	1.442347e+002	1229	27	7.002905e+000	0	0	0	0	0	0	1236.62	1	1	48.5334	27.0595
DATA	73	1	73	0	0	A_64_P041004	NM_001108599	5419.06	188.329	2.332844e+004	2.332846e+003	19376	27	7.172854e+000	0	0	0	0	0	0	19788.7	1	1	51.7088	27.8604
DATA	74	1	74	0	0	A_42_P494276	NM_001109663	5444.37	188.127	7.497668e+002	7.505218e+001	664	26	6.474300e+000	0	0	0	1	0	0	632.518	1	1	47.5395	26.5667
DATA	75	1	75	66	1	DarkCorner	DarkCorner	5469.76	188.5	6.484735e+000	3.445371e+000	64	25	6.381834e+000	0	0	0	0	0	0	5.44144	1	0	51.0895	25.5435
DATA	76	1	76	66	1	DarkCorner	DarkCorner	5495.19	188.662	3.415380e+000	3.413464e+000	64	26	7.208995e+000	0	0	0	0	0	0	2.32401	0	0	48.5334	26.2906
DATA	77	1	77	66	1	DarkCorner	DarkCorner	5520.76	188.741	4.812992e+000	3.454241e+000	63	26	6.800357e+000	0	0	0	0	0	0	3.99526	1	0	51.4001	26.3417
DATA	78	1	78	66	1	DarkCorner	DarkCorner	5545.89	188.5	3.452367e+000	3.440616e+000	60	26	7.173325e+000	0	0	0	0	0	0	0.88935	0	0	56.9804	26.9593
DATA	79	1	79	66	1	DarkCorner	DarkCorner	5571.32	188.494	5.068503e+000	3.494192e+000	62	25	6.816114e+000	0	0	0	0	0	0	4.16271	1	0	50.4627	26.088
DATA	80	1	80	66	1	DarkCorner	DarkCorner	5597.26	188.63	6.474256e+000	3.535440e+000	66	26	6.406955e+000	0	0	0	0	0	0	5.28907	1	0	51.0895	26.4747
DATA	81	1	81	66	1	DarkCorner	DarkCorner	5622.4	188.708	1.014465e+001	3.637710e+000	66	27	6.957756e+000	0	0	0	0	0	0	8.24547	1	0	48.5334	27.1772
DATA	82	1	82	66	1	DarkCorner	DarkCorner	5647.5	188.5	1.224053e+001	3.718437e+000	68	26	6.314508e+000	0	0	0	0	0	0	9.89855	1	0	57.5363	26.5662
DATA	83	1	83	66	1	DarkCorner	DarkCorner	5673.39	188.829	1.495043e+001	3.832380e+000	71	26	6.683814e+000	0	0	0	1	0	0	12.0299	1	0	47.2035	26.2564
DATA	84	1	84	260	1	GE_BrightCorner	GE_BrightCorner	5698.42	188.573	5.703268e+004	5.703269e+003	45655	26	7.183118e+000	0	0	0	0	0	0	45667.6	1	1	57.5363	26.9941
DATA	85	1	85	260	1	GE_BrightCorner	GE_BrightCorner	5723.58	188.573	5.743794e+004	5.743795e+003	45785	28	8.011405e+000	0	0	0	0	0	0	45775.6	1	1	57.5363	28.5472
DATA	86	2	1	260	1	GE_BrightCorner	GE_BrightCorner	3603.56	194.483	5.165742e+004	5.165742e+003	45682	26	7.336618e+000	0	0	0	0	0	0	45981.1	1	1	52.9257	26.8278
DATA	87	2	2	66	1	DarkCorner	DarkCorner	3628.58	194.573	7.475953e+000	3.258608e+000	68	26	6.569533e+000	0	0	0	0	0	0	6.6927	1	0	57.5363	26.4069
DATA	88	2	3	66	1	DarkCorner	DarkCorner	3654.33	194.5	3.641053e+000	3.174589e+000	64	27	7.684968e+000	0	0	0	0	0	0	3.27824	1	0	57.5363	27.5196
DATA	89	2	4	66	1	DarkCorner	DarkCorner	3679.51	194.395	3.148843e+000	3.141817e+000	60	26	6.318434e+000	0	0	0	0	0	0	1.64038	0	0	49.8279	27.2404
DATA	90	2	5	66	1	DarkCorner	DarkCorner	3705.26	194.389	3.131863e+000	3.124825e+000	61	25	6.250355e+000	0	0	0	0	0	0	1.63236	0	0	48.5334	25.6471
DATA	91	2	6	66	1	DarkCorner	DarkCorner	3730.64	194.39	3.115729e+000	3.110040e+000	61	26	6.289048e+000	0	0	0	0	0	0	1.82983	0	0	49.8279	26.1362
DATA	92	2	7	66	1	DarkCorner	DarkCorner	3755.69	194.786	3.100138e+000	3.088072e+000	58.5	26	8.480372e+000	0	0	0	0	0	0	-0.544751	0	0	47.2035	27.7035
DATA	93	2	8	66	1	DarkCorner	DarkCorner	3781.33	194.5	3.085228e+000	3.082607e+000	61	27	6.531776e+000	0	0	0	0	0	0	2.22093	0	0	57.5363	27.3838
DATA	94	2	9	66	1	DarkCorner	DarkCorner	3806.41	194.139	3.071295e+000	3.059342e+000	59	26	6.717449e+000	0	0	0	0	0	0	-0.687139	0	0	50.1463	26.0909
DATA	95	2	10	66	1	DarkCorner	DarkCorner	3832	194.545	3.057224e+000	3.045325e+000	57.5	25	6.901896e+000	0	0	0	0	0	0	-2.7992	0	0	55.8519	26.1692
DATA	96	2	11	0	0	A_44_P212746	ENSRNOT00000049707	3857.63	194.302	2.593061e+001	3.989834e+000	84	26	7.183996e+000	0	0	0	0	0	0	24.281	1	1	44.4243	26.2749
DATA	97	2	12	0	0	A_64_P103615	NM_001107179	3882.58	194.573	1.345118e+002	1.378601e+001	184	25	7.060120e+000	0	0	0	0	0	0	126.47	1	1	57.5363	25.5025
DATA	98	2	13	0	0	A_44_P550697	NM_001106400	3908.09	194.614	2.403279e+002	2.422031e+001	281.5	23	6.371269e+000	0	0	0	0	0	0	226.854	1	1	57.259	23.608
DATA	99	2	14	0	0	A_64_P045429	A_64_P045429	3933.6	194.9	3.135144e+001	4.336944e+000	90	17	5.018782e+000	0	0	0	0	1	0	29.7062	1	1	47.2035	16.9227
DATA	100	2	15	0	0	A_64_P075175	ENSRNOT00000044322	3958.63	194.596	2.161579e+002	2.182111e+001	265	23	7.264215e+000	0	0	0	0	0	0	205.518	1	1	57.8122	23.995
DATA	101	2	16	0	0	A_44_P472801	NM_173121	3984.09	194.896	4.360093e+003	4.360194e+002	4086	25	6.589469e+000	0	0	0	0	0	0	4159.56	1	1	46.8651	25.5291
DATA	102	2	17	0	0	A_42_P491486	NM_022533	4009.67	194.75	4.892999e+003	4.893089e+002	4596	26	6.178934e+000	0	0	0	0	0	0	4682.6	1	1	47.5395	25.7277
DATA	103	2	18	0	0	A_43_P12736	NM_033299	4035.09	194.935	7.165164e+001	7.751804e+000	128.5	26	6.983789e+000	0	0	0	0	0	0	68.7743	1	1	54.4085	26.4902
DATA	104	2	19	0	0	A_64_P158790	A_64_P158790	4060.5	195	4.040583e+004	4.040584e+003	38464.5	26	7.046847e+000	0	0	0	0	0	0	38889.6	1	1	54.1152	26.2079
DATA	105	2	20	0	0	A_44_P229481	NM_001191077	4086.06	194.687	2.631294e+002	2.647698e+001	314	24	6.301011e+000	0	0	0	0	0	0	253.886	1	1	45.835	24.9227
DATA	106	2	21	0	0	A_64_P133836	ENSRNOT00000039319	4111.36	194.959	1.028975e+001	3.110968e+000	69.5	27	6.275098e+000	0	0	0	0	0	0	9.95162	1	0	49.1849	26.505
DATA	107	2	22	0	0	A_43_P13137	NM_130818	4136.5	195	1.978650e+001	3.535311e+000	79	28	7.108537e+000	0	0	0	0	0	0	19.1764	1	1	54.1152	27.8592
DATA	108	2	23	0	0	A_42_P586141	NM_017035	4162.03	194.986	2.820806e+002	2.835922e+001	338	26	6.618512e+000	0	0	0	0	0	0	273.903	1	1	46.8651	26.3828
DATA	109	2	24	0	0	A_44_P142850	NM_001106975	4187.51	194.946	6.783245e+001	7.384738e+000	126	25	7.014662e+000	0	0	0	0	0	0	65.9772	1	1	48.5334	25.3382
DATA	110	2	25	0	0	A_44_P1042504	NM_001044232	4212.5	195	2.005826e+002	2.026897e+001	255.5	25	6.122840e+000	0	0	0	0	0	0	195.382	1	1	54.1152	25.203
DATA	111	2	26	0	0	A_42_P476474	NM_001033926	4238.16	194.897	5.773114e+003	5.773188e+002	5592.5	26	6.862481e+000	0	0	0	0	0	0	5630.53	1	1	46.5243	26.3268
DATA	112	2	27	0	0	A_44_P480882	ENSRNOT00000035496	4263.5	195	1.819664e+001	3.430568e+000	76	26	6.922867e+000	0	0	0	0	0	0	17.7661	1	1	54.1152	26.5049
DATA	113	2	28	0	0	A_44_P1042696	NM_001106377	4288.93	194.786	9.411493e+003	9.411538e+002	8860	27	6.620929e+000	0	0	0	0	0	0	9196.28	1	1	46.8651	26.2913
DATA	114	2	29	0	0	A_64_P132576	NM_001012357	4314.56	195.027	2.820642e+002	2.835551e+001	337	27	6.499827e+000	0	0	0	0	0	0	275.799	1	1	48.5334	26.5588
DATA	115	2	30	0	0	A_42_P652357	NM_021868	4339.5	195	3.128197e+004	3.128198e+003	30404	25	7.232728e+000	0	0	0	0	0	0	30599.5	1	1	54.1152	26.5762
DATA	116	2	31	0	0	A_64_P134935	NM_001107976	4365.43	195.026	1.617702e+001	3.322522e+000	77	26	6.436970e+000	0	0	0	0	0	0	15.8275	1	1	49.1849	26.5377
DATA	117	2	32	0	0	A_64_P034019	NM_001107145	4390.56	195.027	3.978520e+001	4.924521e+000	100	25	6.213851e+000	0	0	0	0	0	0	38.9254	1	1	48.5334	25.8205
DATA	118	2	33	0	0	A_64_P140634	A_64_P140634	4416.22	194.75	3.058945e+003	3.059082e+002	3016.5	27	6.445950e+000	0	0	0	0	0	0	2992.07	1	1	45.1352	27.1089
DATA	120	2	35	0	0	A_42_P746029	NM_144748	4466.69	194.692	2.829396e+001	4.055837e+000	88	26	6.589689e+000	0	0	0	0	0	0	27.6463	1	1	45.1352	26.4833
DATA	121	2	36	0	0	A_64_P009032	NM_001105801	4492.42	195.427	3.013783e+004	3.013784e+003	28663	26	6.463601e+000	0	0	0	0	0	0	29426.1	1	1	57.5363	26.4175
DATA	122	2	37	0	0	A_42_P764792	NM_001014036	4517.68	195.395	3.325023e+002	3.337742e+001	385	25	6.379664e+000	0	0	0	0	0	0	324.314	1	1	49.5074	25.2692
DATA	123	2	38	0	0	A_64_P029278	NM_001108687	4542.76	195.2	3.773574e+002	3.784814e+001	420	26	7.358704e+000	0	0	0	0	0	0	367.605	1	1	48.8603	26.485
DATA	124	2	39	0	0	A_43_P12266	NM_022622	4568.57	195.167	7.477084e+001	8.026665e+000	132	26	6.571624e+000	0	0	0	0	0	0	72.7318	1	1	47.8731	26.6733
DATA	125	2	40	0	0	A_44_P204710	ENSRNOT00000049315	4594.01	195.26	2.255647e+001	3.692727e+000	82	25	6.167894e+000	0	0	0	0	0	0	21.9057	1	1	47.8731	25.3005
DATA	126	2	41	0	0	A_64_P163837	NM_001013149	4619.11	195.5	1.190128e+002	1.225639e+001	175.5	27	5.881409e+000	0	0	0	0	0	0	115.375	1	1	56.9804	27.199
DATA	127	2	42	0	0	A_64_P016202	XM_001080153	4644.5	195.5	6.432667e+000	3.004516e+000	67	27	6.361688e+000	0	0	0	0	0	0	6.22345	1	0	57.5363	26.8922
DATA	128	2	43	0	0	A_64_P137168	NM_053912	4669.51	194.81	9.872689e+003	9.872733e+002	9212	26.5	7.815709e+000	0	0	0	0	0	0	9529.93	1	1	43.7019	27.5
DATA	129	2	44	0	0	A_42_P830598	XM_001063895	4695.33	195.068	9.757111e+002	9.761566e+001	977	27.5	8.582897e+000	0	0	0	0	0	0	939.585	1	1	48.8603	28.3301
DATA	130	2	45	0	0	A_42_P525886	NM_001105716	4720.58	195.427	1.670638e+002	1.696587e+001	212.5	27	7.183648e+000	0	0	0	0	0	0	160.476	1	1	57.5363	28.0657
DATA	131	2	46	0	0	A_42_P836392	NM_134383	4746.11	195.5	1.171309e+004	1.171313e+003	10879	27	7.567219e+000	0	0	0	0	0	0	11220.3	1	1	56.9804	27.4394
DATA	132	2	47	0	0	A_44_P146783	NM_001001366	4771.5	195.5	4.876859e+001	5.711501e+000	107	27	6.698923e+000	0	0	0	0	0	0	46.5802	1	1	57.5363	27.0048
DATA	133	2	48	0	0	A_44_P294675	NM_053687	4796.67	195.5	3.548479e+001	4.635034e+000	92.5	26	6.330239e+000	0	0	0	0	0	0	33.7887	1	1	65	26.2814
DATA	134	2	49	0	0	A_64_P047137	NM_001001283	4822.34	195.11	1.679325e+001	3.431015e+000	75	25	6.380190e+000	0	0	0	0	0	0	15.937	1	1	48.5334	25.1606
DATA	135	2	50	0	0	A_44_P170396	NM_017267	4847.8	195.043	1.932343e+001	3.570364e+000	80	27	6.527503e+000	0	0	0	0	0	0	18.2752	1	1	46.8651	26.6633
DATA	136	2	51	0	0	A_64_P077603	ENSRNOT00000037503	4873.11	195.5	9.285533e+001	9.762063e+000	147.5	27	6.852532e+000	0	0	0	0	0	0	87.5119	1	1	56.9804	26.9109
DATA	137	2	52	0	0	A_42_P648800	AA998304	4898.44	195.347	1.137678e+002	1.177183e+001	166.5	25.5	6.609593e+000	0	0	0	0	0	0	106.82	1	1	49.1849	26.0693
DATA	138	2	53	0	0	A_64_P143186	A_64_P143186	4923.67	195.5	5.922653e+001	6.655303e+000	115	26	7.442798e+000	0	0	0	0	0	0	55.3974	1	1	57.5363	26.7913
DATA	139	2	54	0	0	A_42_P622681	NM_001030020	4948.99	195.616	6.659814e+003	6.659884e+002	5944	26	7.455733e+000	0	0	0	1	0	0	6204.46	1	1	48.8603	26.8905
DATA	140	2	55	0	0	A_42_P506076	NM_019253	4974.5	195.5	3.049960e+004	3.049962e+003	27974	27	6.861117e+000	0	0	0	1	0	0	28295.4	1	1	57.5363	28.1422
DATA	141	2	56	0	0	A_64_P158975	NM_001109536	5000	195.545	1.348802e+002	1.383383e+001	178	26	7.183810e+000	0	0	0	0	0	0	124.597	1	1	55.8519	26.7664
DATA	142	2	57	0	0	A_42_P655425	NM_001106406	5025.68	195.254	1.019620e+003	1.020087e+002	980	27	6.948839e+000	0	0	0	1	0	0	937.644	1	1	47.5395	27.1122
DATA	143	2	58	0	0	A_44_P408520	NM_031569	5050.87	195.214	1.816403e+002	1.842692e+001	222	26	6.997371e+000	0	0	0	0	0	0	166.287	1	1	46.5243	26.4854
DATA	144	2	59	0	0	A_64_P031259	NM_001002022	5076.41	195.32	1.333767e+002	1.369682e+001	182	28	7.465332e+000	0	0	0	0	0	0	121.537	1	1	48.8603	28.6411
DATA	145	2	60	0	0	A_43_P10227	NM_024397	5101.73	195.254	1.138476e+004	1.138480e+003	9903	28	7.207792e+000	0	0	0	0	0	0	10325	1	1	47.2035	28.6602
DATA	146	2	61	0	0	A_42_P542744	NM_001107544	5126.91	195.539	7.428840e+003	7.428906e+002	6587	27	7.412957e+000	0	0	0	1	0	0	6705.45	1	1	48.8603	27.1951
DATA	147	2	62	0	0	A_64_P052387	A_64_P052387	5152.42	195.573	1.123422e+002	1.167055e+001	163	27	7.824269e+000	0	0	0	0	0	0	100.902	1	1	57.5363	27.6788
DATA	149	2	64	0	0	A_64_P064823	ENSRNOT00000050238	5203.01	195.632	3.155447e+002	3.171564e+001	341.5	27	7.529750e+000	0	0	0	0	0	0	280.575	1	1	49.1849	27.7475
DATA	150	2	65	0	0	A_42_P730292	NM_001004244	5228.63	195.444	2.004529e+003	2.004786e+002	1797.5	27	6.067468e+000	0	0	0	0	0	0	1773.05	1	1	48.2044	27.3081
DATA	151	2	66	0	0	A_64_P052878	FM104687	5254	195.545	2.969307e+002	2.986789e+001	319	27	6.660210e+000	0	0	0	0	0	0	261.28	1	1	55.8519	27.0625
DATA	152	2	67	0	0	A_64_P157171	XM_001063008	5279.5	195.5	2.153927e+003	2.154171e+002	1969	26	6.481589e+000	0	0	0	0	0	0	1885.28	1	1	52.9257	26.7317
DATA	153	2	68	0	0	A_44_P693350	ENSRNOT00000030985	5304.58	195.573	9.564220e+000	3.398424e+000	68.5	26	7.617933e+000	0	0	0	0	0	0	8.32752	1	0	65	27.6449
DATA	154	2	69	0	0	A_64_P090168	NM_001000720	5330.37	195.596	4.349536e+001	5.446958e+000	97	27	7.138925e+000	0	0	0	0	0	0	37.6658	1	1	65	27.2816
DATA	155	2	70	0	0	A_42_P726392	NM_001106353	5355.34	196.027	1.542129e+003	1.542481e+002	1329	28	7.474963e+000	0	0	0	1	0	0	1328.51	1	1	49.1849	28.6269
DATA	156	2	71	0	0	A_64_P015727	FQ218047	5380.84	195.897	5.410305e+003	5.410407e+002	4582.5	28	7.304385e+000	0	0	0	0	0	0	4635.47	1	1	46.5243	28.0644
DATA	157	2	72	0	0	A_44_P897023	NM_001008364	5406.3	195.9	7.494575e+002	7.501979e+001	691	27	7.231310e+000	0	0	0	0	0	0	638.643	1	1	47.2035	27.8856
DATA	158	2	73	0	0	A_44_P104776	NM_001001425	5431.5	196	6.588178e+001	7.390968e+000	116.5	26	6.515442e+000	0	0	0	0	0	0	55.8406	1	1	54.1152	26.5183
DATA	159	2	74	0	0	A_64_P142521	A_64_P142521	5457.09	195.935	1.385173e+001	3.642054e+000	71	26	6.724385e+000	0	0	0	0	0	0	11.6765	1	0	54.4085	25.9697
DATA	160	2	75	66	1	DarkCorner	DarkCorner	5482.47	195.785	3.399941e+000	3.389053e+000	61	26	7.464246e+000	0	0	0	0	0	0	1.0568	0	0	49.5074	27.005
DATA	161	2	76	66	1	DarkCorner	DarkCorner	5507.91	195.935	3.785141e+000	3.425825e+000	62.5	25	6.375917e+000	0	0	0	0	0	0	3.15653	1	0	54.4085	25.6808
DATA	162	2	77	66	1	DarkCorner	DarkCorner	5533.5	196	3.436519e+000	3.423143e+000	58	27	7.520425e+000	0	0	0	0	0	0	-0.102728	0	0	54.1152	27.4631
DATA	163	2	78	66	1	DarkCorner	DarkCorner	5558.5	196	3.454450e+000	3.441005e+000	57	26	7.590637e+000	0	0	0	0	0	0	-2.13732	0	0	54.1152	27.024
DATA	164	2	79	66	1	DarkCorner	DarkCorner	5584.46	196.238	3.472738e+000	3.460519e+000	60	26	6.462756e+000	0	0	0	0	0	0	0.777527	0	0	49.5074	26.9764
DATA	165	2	80	66	1	DarkCorner	DarkCorner	5610.04	196.056	3.491007e+000	3.478087e+000	59	27	7.379475e+000	0	0	0	0	0	0	0.556292	0	0	46.8651	27.775
DATA	166	2	81	66	1	DarkCorner	DarkCorner	5635.18	196	3.508660e+000	3.495339e+000	58	26	5.989083e+000	0	0	0	0	0	0	0.393309	0	0	46.8651	26.235
DATA	167	2	82	66	1	DarkCorner	DarkCorner	5660.33	196	3.746149e+000	3.532243e+000	63	26	6.874369e+000	0	0	0	0	0	0	3.02842	1	0	49.1849	27.0625
DATA	168	2	83	66	1	DarkCorner	DarkCorner	5685.5	196	1.317705e+001	3.767349e+000	67	27	6.543191e+000	0	0	0	0	0	0	10.6009	1	0	54.1152	27.4195
DATA	169	2	84	66	1	DarkCorner	DarkCorner	5711	196	1.091810e+001	3.710621e+000	66	27	8.150427e+000	0	0	0	0	0	0	8.74158	1	0	65	28.3299
DATA	170	2	85	260	1	GE_BrightCorner	GE_BrightCorner	5736.5	196	5.251425e+004	5.251426e+003	41143.5	27	7.424241e+000	0	0	0	1	0	0	41849.6	1	1	54.1152	27.4444
DATA	171	3	1	66	1	DarkCorner	DarkCorner	3590.58	201.573	1.402618e+001	3.488493e+000	71	27	7.325801e+000	0	0	0	1	0	0	12.4686	1	0	57.5363	26.7372
DATA	172	3	2	66	1	DarkCorner	DarkCorner	3616.09	201.614	5.658371e+000	3.225458e+000	62	29	7.374640e+000	0	0	0	0	0	0	5.05957	1	0	57.259	29.4333
DATA	173	3	3	66	1	DarkCorner	DarkCorner	3641.44	201.938	3.623159e+000	3.177978e+000	62	29	7.965683e+000	0	0	0	0	0	0	3.25839	1	0	50.4627	29.6346
DATA	174	3	4	66	1	DarkCorner	DarkCorner	3667.12	201.494	3.152241e+000	3.140995e+000	59.5	28	6.371685e+000	0	0	0	0	0	0	0.724696	0	0	49.8279	28.386
DATA	175	3	5	66	1	DarkCorner	DarkCorner	3692.5	202	4.548140e+000	3.155757e+000	61.5	26	7.165472e+000	0	0	0	0	0	0	4.13537	1	0	54.1152	27.3684
DATA	176	3	6	66	1	DarkCorner	DarkCorner	3717.96	201.887	3.118748e+000	3.106610e+000	57	26	6.626859e+000	0	0	0	0	0	0	-2.78863	0	0	49.5074	27.5
DATA	177	3	7	66	1	DarkCorner	DarkCorner	3742.46	202.136	3.103432e+000	3.091354e+000	58	28.5	8.863824e+000	0	0	0	0	0	0	-0.999672	0	0	49.8279	30.1667
DATA	178	3	8	66	1	DarkCorner	DarkCorner	3768.45	202.123	3.087968e+000	3.075949e+000	57	27	7.398462e+000	0	0	0	0	0	0	-2.45739	0	0	48.2044	28.3673
DATA	179	3	9	66	1	DarkCorner	DarkCorner	3793.77	202.014	3.073570e+000	3.062774e+000	60.5	28	6.327043e+000	0	0	0	0	0	0	0.784056	0	0	46.8651	27.6042
DATA	180	3	10	66	1	DarkCorner	DarkCorner	3819.5	202	3.059496e+000	3.047648e+000	61	27	9.195295e+000	0	0	0	0	0	0	0.1783	0	0	54.1152	28.1111
DATA	181	3	11	0	0	A_64_P269465	ENSRNOT00000055742	3844.5	202	1.324914e+001	3.311181e+000	72	27	7.764428e+000	0	0	0	0	0	0	12.397	1	0	54.1152	27.4386
DATA	182	3	12	0	0	A_64_P140776	NM_001114502	3869.84	201.897	6.969379e+003	6.969445e+002	6356.5	26	7.464919e+000	0	0	0	0	0	0	6548.24	1	1	46.5243	26.537
DATA	183	3	13	0	0	A_42_P662683	NM_001108855	3895.44	202.027	1.798123e+004	1.798125e+003	16579	26	7.974264e+000	0	0	0	0	0	0	16963.1	1	1	48.5334	28.0444
DATA	184	3	14	0	0	A_44_P308687	NM_181389	3920.56	202.027	8.686368e+001	9.189354e+000	141	21	6.538662e+000	0	0	0	0	1	0	82.2535	1	1	48.5334	21.8478
DATA	185	3	15	0	0	A_42_P705255	NM_078622	3946.01	202.097	1.181560e+002	1.218748e+001	172	22.5	6.656867e+000	0	0	0	0	1	0	112.291	1	1	46.8651	22.82
DATA	186	3	16	0	0	A_44_P142472	NM_001106072	3971.56	202	8.838359e+003	8.838409e+002	8191	26	7.166990e+000	0	0	0	0	0	0	8428.38	1	1	49.8279	27.434
DATA	187	3	17	0	0	A_64_P015946	NM_001009720	3996.87	201.944	8.781457e+002	8.786471e+001	888.5	27.5	7.579792e+000	0	0	0	0	0	0	840.087	1	1	46.8651	26.5357
DATA	188	3	18	0	0	A_64_P118698	ENSRNOT00000050943	4022.27	201.9	3.804458e+001	4.819782e+000	96	30	6.312500e+000	0	0	0	0	0	0	36.5053	1	1	46.5243	29.037
DATA	189	3	19	0	0	A_42_P705302	NM_001107361	4047.44	202.027	6.828963e+003	6.829026e+002	6431	29	6.662271e+000	0	0	0	0	0	0	6571.08	1	1	48.5334	29.0545
DATA	190	3	20	0	0	A_64_P097547	NM_001100528	4073.12	201.942	5.833511e+001	6.533888e+000	120	27.5	6.599390e+000	0	0	0	0	0	0	56.2796	1	1	46.8651	27.3929
DATA	191	3	21	0	0	A_42_P815485	NM_001013908	4098.43	202.177	1.046504e+004	1.046509e+003	9898	27	5.852228e+000	0	0	0	0	0	0	10120.9	1	1	49.5074	27.42
DATA	192	3	22	0	0	A_42_P526728	ENSRNOT00000060758	4123.86	202.211	2.580935e+003	2.581101e+002	2409.5	31	5.449651e+000	0	0	0	0	0	0	2501.55	1	1	47.2035	31.2857
DATA	193	3	23	0	0	A_42_P692317	NM_001107565	4149.42	202.427	1.048993e+003	1.049400e+002	1047	25.5	6.628639e+000	0	0	0	0	0	0	1018.8	1	1	57.5363	26.2037
DATA	194	3	24	0	0	A_44_P383949	NM_175593	4174.58	202.427	4.124537e+001	5.052614e+000	100.5	26	6.305448e+000	0	0	0	0	0	0	40.1287	1	1	57.5363	26.0769
DATA	195	3	25	0	0	A_42_P589570	NM_001014105	4200.14	202.407	3.279574e+002	3.292493e+001	380	25.5	5.897826e+000	0	0	0	0	0	0	319.581	1	1	56.9804	26.2273
DATA	196	3	26	0	0	A_64_P012384	NM_001039338	4225.5	202.352	7.035840e+001	7.613836e+000	129	25	5.220172e+000	0	0	0	0	0	0	68.6539	1	1	57.5363	24.902
DATA	197	3	27	0	0	A_64_P088612	NM_053871	4250.64	201.871	5.477304e+003	5.477381e+002	5242	26	5.653163e+000	0	0	0	0	0	0	5350.32	1	1	46.8651	25.4909
DATA	198	3	28	0	0	A_42_P668072	NM_013130	4276.42	202.427	1.740454e+002	1.764511e+001	231	26	7.138511e+000	0	0	0	0	0	0	170.186	1	1	57.5363	27.8571
DATA	199	3	29	0	0	A_44_P624451	NM_001134605	4301.5	202.158	6.725121e+001	7.324465e+000	127	27	6.396614e+000	0	0	0	0	0	0	65.8045	1	1	49.8279	28.1429
DATA	200	3	30	0	0	A_64_P118502	A_64_P118502	4327.05	202.477	2.477159e+002	2.494079e+001	287	29	8.852074e+000	0	0	0	0	0	0	242.524	1	1	55.8519	30.6038
DATA	201	3	31	0	0	A_43_P15761	NM_031608	4352.42	202.427	1.171896e+002	1.207228e+001	174	28	7.970822e+000	0	0	0	0	0	0	114.768	1	1	57.5363	29.0545
DATA	202	3	32	0	0	A_42_P667696	NM_001191800	4377.94	202.506	1.650219e+003	1.650473e+002	1631	26	7.503344e+000	0	0	0	0	0	0	1616.29	1	1	50.4627	27.6939
DATA	203	3	33	0	0	A_44_P899121	NM_001079941	4403.3	202.1	5.122495e+003	5.122577e+002	4950.5	28	7.427223e+000	0	0	0	0	0	0	5016.33	1	1	47.2035	29.8545
DATA	204	3	34	0	0	A_42_P642757	NM_031235	4428.37	202	5.534541e+003	5.534617e+002	5168.5	27	7.560842e+000	0	0	0	0	0	0	5418.06	1	1	45.4864	28.6182
DATA	205	3	35	0	0	A_64_P066694	NM_001033898	4454.11	202.5	3.707198e+001	4.707829e+000	96.5	26.5	6.317065e+000	0	0	0	0	0	0	36.2749	1	1	56.9804	27.3043
DATA	206	3	36	0	0	A_42_P699201	TC594545	4479.43	201.783	4.097865e+001	5.022627e+000	101.5	26	6.594788e+000	0	0	0	0	0	0	40.0644	1	1	46.8651	26.386
DATA	207	3	37	0	0	A_42_P591944	NM_172093	4504.67	202.5	1.377108e+002	1.407448e+001	195	28.5	7.662165e+000	0	0	0	0	0	0	134.527	1	1	57.5363	28.8125
DATA	208	3	38	0	0	A_44_P115293	NM_001108294	4530.38	202.608	1.426263e+002	1.455644e+001	200	28	7.942061e+000	0	0	0	0	0	0	139.171	1	1	48.8603	28.6522
DATA	209	3	39	1028	1	(+)E1A_r60_a107	E1A_r60_a107	4555.5	202.5	2.368582e+001	3.755027e+000	83.5	26	6.944077e+000	0	0	0	0	0	0	23.0812	1	1	57.5363	27.2308
DATA	210	3	40	0	0	A_44_P194531	NM_001007742	4581.12	202.397	1.719354e+002	1.743945e+001	226	26	5.003060e+000	0	0	0	0	0	0	167.286	1	1	48.5334	26.1
DATA	211	3	41	0	0	A_43_P20016	NM_001107377	4606.5	202.5	7.209076e+001	7.779234e+000	128	27	5.057062e+000	0	0	0	0	0	0	70.0215	1	1	57.5363	25.76
DATA	212	3	42	0	0	A_64_P105550	A_64_P105550	4631.67	202.5	1.198974e+002	1.234229e+001	177	28	6.741548e+000	0	0	0	0	0	0	116.235	1	1	57.5363	28.1132
DATA	213	3	43	0	0	A_42_P791872	NM_001135174	4657.21	202.26	9.025639e+003	9.025687e+002	8468	28	6.499182e+000	0	0	0	0	0	0	8731.15	1	1	48.5334	28.625
DATA	214	3	44	0	0	A_42_P499273	NM_001012148	4682.61	202.423	2.793909e+003	2.794063e+002	2672	30.5	8.544781e+000	0	0	0	0	0	0	2696.63	1	1	47.8731	30.9259
DATA	215	3	45	0	0	A_64_P021960	NM_001109493	4707.96	202.569	4.687223e+002	4.696491e+001	504	29	6.302901e+000	0	0	0	0	0	0	451.297	1	1	48.2044	29.3103
DATA	216	3	46	0	0	A_64_P083725	A_64_P083725	4733.42	202.573	1.142508e+005	1.142508e+004	109750	30.5	7.213357e+000	0	0	0	0	0	0	109711	1	1	57.5363	30.3333
DATA	217	3	47	0	0	A_42_P524536	NM_012698	4758.47	202.533	3.392254e+002	3.405189e+001	375	27	8.907785e+000	0	0	0	0	0	0	324.839	1	1	49.1849	28.5738
DATA	218	3	48	0	0	A_64_P151675	NM_175755	4784.23	202.473	7.022610e+001	7.626459e+000	128.5	27.5	6.547425e+000	0	0	0	0	0	0	67.0432	1	1	48.8603	28.6154
DATA	219	3	49	0	0	A_64_P146914	A_64_P146914	4809.56	202.534	1.029656e+003	1.030088e+002	1038.5	26	6.586999e+000	0	0	0	0	0	0	979.901	1	1	49.1849	26.9818
DATA	220	3	50	0	0	A_64_P115065	NM_001109631	4835	202.545	1.353299e+001	3.285207e+000	72	28	6.949643e+000	0	0	0	0	0	0	12.8362	1	0	65	28.1698
DATA	221	3	51	0	0	A_42_P468771	NM_001107362	4860.56	202.534	2.878157e+003	2.878313e+002	2718.5	27	7.008717e+000	0	0	0	1	0	0	2720.41	1	1	49.1849	27.4468
DATA	222	3	52	0	0	A_44_P226461	NM_053798	4885.54	202.386	1.217220e+003	1.217594e+002	1151.5	27	5.970917e+000	0	0	0	0	0	0	1146.37	1	1	47.5395	26.8793
DATA	223	3	53	0	0	A_64_P009440	NM_001109313	4911.41	202.823	2.402693e+001	3.864131e+000	82	27	6.628587e+000	0	0	0	0	0	0	22.5429	1	1	50.1463	27.1304
DATA	224	3	54	0	0	A_44_P282433	NM_033230	4936.65	202.675	5.073221e+002	5.082311e+001	527	26	7.345719e+000	0	0	0	0	0	0	474.121	1	1	50.7771	26.86
DATA	225	3	55	0	0	A_42_P461003	NM_001044283	4961.77	202.873	1.183284e+004	1.183288e+003	10787.5	31	8.993244e+000	0	0	0	0	0	0	11014.4	1	1	47.2035	30.6275
DATA	226	3	56	0	1	ETG10_236652	ETG10_236652	4987.42	202.573	2.093516e+001	3.710494e+000	77.5	31	8.029701e+000	0	0	0	0	0	0	19.4038	1	1	65	30.9273
DATA	227	3	57	0	0	A_42_P529780	NM_138855	5012.58	202.573	8.553083e+002	8.558614e+001	823	28	6.198214e+000	0	0	0	0	0	0	789.353	1	1	57.5363	29.2679
DATA	228	3	58	0	0	A_42_P492976	NM_001126099	5037.91	202.613	2.602169e+002	2.620455e+001	298.5	27	8.073208e+000	0	0	0	0	0	0	239.091	1	1	49.1849	29.4211
DATA	229	3	59	0	0	A_42_P533865	NM_001127650	5063.44	202.879	3.360193e+001	4.574688e+000	92	32	8.321228e+000	0	0	0	0	0	0	30.7342	1	1	46.1809	31.7593
DATA	230	3	60	0	0	A_64_P026399	NM_001007626	5089.3	202.827	1.108390e+003	1.108829e+002	1058	32.5	8.465172e+000	0	0	0	0	0	0	1008.98	1	1	49.8279	31.8542
DATA	231	3	61	0	0	A_64_P152543	XM_221353	5114.3	202.9	1.220850e+004	1.220854e+003	10788	29	6.828282e+000	0	0	0	0	0	0	11061.7	1	1	47.2035	29.3571
DATA	232	3	62	0	0	A_44_P203195	NM_053585	5139.44	202.894	7.607564e+002	7.614078e+001	747	32.5	9.506428e+000	0	0	0	0	0	0	685.983	1	1	45.4864	33.0192
DATA	233	3	63	0	0	A_42_P490612	NM_001108262	5164.88	202.905	8.843581e+003	8.843638e+002	7637	28	8.505858e+000	0	0	0	0	0	0	7934.95	1	1	47.5395	28.8421
DATA	234	3	64	0	0	A_44_P457548	NM_001103351	5190.47	203.151	4.537728e+001	5.541320e+000	99	27.5	9.448535e+000	0	0	0	0	0	0	40.5113	1	1	47.8731	28.4583
DATA	235	3	65	0	0	A_42_P755665	NM_001013154	5216.08	202.948	2.804620e+003	2.804802e+002	2463.5	28	6.160899e+000	0	0	0	1	0	0	2490.92	1	1	47.8731	27.9259
DATA	236	3	66	0	0	A_42_P781999	NM_001106378	5241.59	202.902	2.409272e+004	2.409274e+003	20567.5	28	7.247641e+000	0	0	0	0	0	0	21287	1	1	49.8279	28.1698
DATA	237	3	67	0	0	A_44_P100289	ENSRNOT00000049514	5266.86	202.803	7.300326e+001	7.983146e+000	124.5	26	5.936663e+000	0	0	0	0	0	0	64.1658	1	1	46.8651	27.1731
DATA	238	3	68	0	0	A_42_P629599	ENSRNOT00000023101	5292.01	203.118	2.683784e+002	2.703357e+001	286	28.5	7.170882e+000	0	0	0	1	0	0	234.677	1	1	46.8651	29.0625
DATA	239	3	69	0	0	A_44_P192083	NM_001047088	5317.5	203	5.589037e+001	6.472627e+000	109	30	6.324675e+000	0	0	0	0	0	0	48.6109	1	1	54.1152	28.7759
DATA	240	3	70	0	0	A_42_P498066	NM_031136	5342.5	203	7.693216e+004	7.693217e+003	66328	31	9.113328e+000	0	0	0	0	0	0	66561	1	1	54.1152	32.2708
DATA	241	3	71	0	0	A_42_P519910	NM_001106292	5368.5	203	2.964425e+004	2.964427e+003	24536.5	28	5.920036e+000	0	0	0	1	0	0	25507.4	1	1	54.1152	28.4815
DATA	242	3	72	0	0	A_42_P657538	NM_001008362	5393.56	203.027	4.405348e+003	4.405473e+002	3636	29	8.022766e+000	0	0	0	1	0	0	3770.52	1	1	48.5334	29.1111
DATA	243	3	73	0	0	A_64_P030630	NM_001109610	5419.44	202.989	5.154956e+003	5.155064e+002	4379	29	6.942247e+000	0	0	0	0	0	0	4387.91	1	1	49.8279	29.3448
DATA	244	3	74	0	0	A_44_P126366	NM_001017456	5444.5	203	5.340170e+001	6.305827e+000	104.5	27	7.424577e+000	0	0	0	0	0	0	45.2149	1	1	54.1152	27.6964
DATA	245	3	75	0	0	A_43_P15627	ENSRNOT00000067029	5470.01	202.851	3.936795e+001	5.183365e+000	91	27	7.517694e+000	0	0	0	0	0	0	33.1519	1	1	46.8651	28.4444
DATA	246	3	76	0	0	A_42_P754784	CB328432	5495.44	203.027	8.212641e+003	8.212711e+002	6663.5	29	6.557410e+000	0	0	0	0	0	0	6879.28	1	1	48.5334	29.0192
DATA	247	3	77	66	1	DarkCorner	DarkCorner	5520.99	203.295	3.420988e+000	3.407673e+000	57	31	8.376326e+000	0	0	0	0	0	0	-1.86882	0	0	49.1849	29.6557
DATA	248	3	78	66	1	DarkCorner	DarkCorner	5546.03	203.241	3.438863e+000	3.425479e+000	57.5	26	6.945004e+000	0	0	0	0	0	0	-2.56955	0	0	49.5074	26.7368
DATA	249	3	79	66	1	DarkCorner	DarkCorner	5571.42	203.427	3.456680e+000	3.443226e+000	58	29	7.376769e+000	0	0	0	0	0	0	-1.44016	0	0	57.5363	29.1186
DATA	250	3	80	66	1	DarkCorner	DarkCorner	5597.24	203.23	3.475032e+000	3.461507e+000	58	27.5	7.923346e+000	0	0	0	0	0	0	-0.565738	0	0	48.8603	28.75
DATA	251	3	81	66	1	DarkCorner	DarkCorner	5622.42	203.427	3.492380e+000	3.491763e+000	60	27	8.582518e+000	0	0	0	0	0	0	2.45467	0	0	57.5363	28.3137
DATA	252	3	82	66	1	DarkCorner	DarkCorner	5647.97	203.468	3.509931e+000	3.500204e+000	60	26	6.577120e+000	0	0	0	0	0	0	1.34733	0	0	49.5074	26.6939
DATA	253	3	83	66	1	DarkCorner	DarkCorner	5673.54	203.113	3.527640e+000	3.515289e+000	59	28	4.964181e+000	0	0	0	0	0	0	0.795766	0	0	50.4627	28.3636
DATA	254	3	84	66	1	DarkCorner	DarkCorner	5699.05	203.386	3.544359e+000	3.537895e+000	59	29	9.563524e+000	0	0	0	0	0	0	1.83064	0	0	51.0895	30.3333
DATA	255	3	85	66	1	DarkCorner	DarkCorner	5723.79	203.378	1.626036e+001	3.901649e+000	71	28	8.536563e+000	0	0	0	1	0	0	13.0177	1	0	51.0895	29.7164
DATA	256	4	1	66	1	DarkCorner	DarkCorner	3603.42	209.427	4.683240e+000	3.213076e+000	61	28	7.397659e+000	0	0	0	0	0	0	4.18325	1	0	57.5363	28.5814
DATA	257	4	2	66	1	DarkCorner	DarkCorner	3628.87	209.208	3.693239e+000	3.182303e+000	63	29	7.478935e+000	0	0	0	0	0	0	3.31769	1	0	49.5074	29.4688
DATA	258	4	3	66	1	DarkCorner	DarkCorner	3654.41	209.326	3.155378e+000	3.153478e+000	62	29.5	7.680801e+000	0	0	0	0	0	0	2.30964	0	0	52.0157	29.4286
DATA	259	4	4	66	1	DarkCorner	DarkCorner	3679.61	209.342	3.138478e+000	3.126263e+000	56	28	7.573775e+000	0	0	0	0	0	0	-1.57378	0	0	50.7771	28.1724
DATA	260	4	5	66	1	DarkCorner	DarkCorner	3705	209.455	3.121960e+000	3.109809e+000	57	26	5.918192e+000	0	0	0	0	0	0	-3.00326	0	0	55.8519	26.525
DATA	261	4	6	66	1	DarkCorner	DarkCorner	3731.2	209.205	3.105766e+000	3.095062e+000	60	28	7.934544e+000	0	0	0	0	0	0	0.849357	0	0	51.4001	28.9032
DATA	262	4	7	66	1	DarkCorner	DarkCorner	3756.24	209.577	3.090487e+000	3.078459e+000	59	27	8.947775e+000	0	0	0	0	0	0	-2.59386	0	0	50.4627	27.7037
DATA	263	4	8	66	1	DarkCorner	DarkCorner	3781.11	209.5	3.076171e+000	3.064198e+000	58	29	7.487100e+000	0	0	0	0	0	0	-3.5726	0	0	56.9804	27.84
DATA	264	4	9	66	1	DarkCorner	DarkCorner	3806.5	209.5	3.062092e+000	3.050174e+000	56.5	27	7.736657e+000	0	0	0	0	0	0	-4.17856	0	0	57.5363	27.7568
DATA	265	4	10	0	0	A_44_P807031	NM_001108921	3832.19	209.357	6.218409e+003	6.218484e+002	5702	27	8.410799e+000	0	0	0	0	0	0	5814.42	1	1	51.4001	27.5294
DATA	266	4	11	0	0	A_64_P025813	NM_001009379	3857.53	209.486	3.674984e+000	3.046067e+000	61	28	7.016849e+000	0	0	0	0	0	0	3.45085	1	0	49.1849	27.641
DATA	267	4	12	0	0	A_64_P130551	XM_001081846	3882.91	208.955	1.746290e+001	3.481533e+000	78	30	7.787479e+000	0	0	0	0	0	0	16.4627	1	1	46.8651	29.1
DATA	268	4	13	0	0	A_42_P715449	NM_001033709	3908.11	209.5	1.989159e+003	1.989385e+002	1895	28	9.671208e+000	0	0	0	1	0	0	1882.61	1	1	56.9804	30.125
DATA	269	4	14	0	0	A_42_P727584	NM_031622	3933.25	209.627	4.156577e+003	4.156684e+002	3905	27	4.603260e+000	0	0	0	1	0	0	3948.35	1	1	49.1849	26.24
DATA	270	4	15	0	0	A_42_P600642	NM_001008386	3958.56	209.87	2.467996e+002	2.485906e+001	289	29.5	7.328414e+000	0	0	0	0	0	0	235.261	1	1	50.1463	28.8125
DATA	271	4	16	0	0	A_42_P669103	NM_001108329	3983.93	209.732	1.414343e+003	1.414654e+002	1373	28	8.480469e+000	0	0	0	0	0	0	1352.62	1	1	47.5395	28.2188
DATA	272	4	17	0	0	A_44_P715330	NM_001024966	4009.56	209.466	5.697239e+002	5.704923e+001	581	28	5.664655e+000	0	0	0	0	0	0	546.538	1	1	49.1849	28.3704
DATA	273	4	18	0	0	A_64_P083185	NM_001107199	4034.93	209.282	5.183965e+002	5.192360e+001	555.5	29	9.722670e+000	0	0	0	0	0	0	498.722	1	1	47.2035	31.697
DATA	274	4	19	0	0	A_64_P037313	ENSRNOT00000030164	4060.5	209.5	1.265591e+001	3.203888e+000	74	29	9.057987e+000	0	0	0	0	0	0	12.209	1	0	57.5363	31.2333
DATA	275	4	20	0	0	A_44_P321009	NM_012540	4086.29	209.667	9.841992e+000	3.096420e+000	68	27	6.737185e+000	0	0	0	0	0	0	9.51867	1	0	44.4243	28.3
DATA	276	4	21	0	0	A_42_P700753	FQ212883	4110.93	209.732	2.241205e+003	2.241396e+002	2161.5	30.5	5.255473e+000	0	0	0	0	0	0	2172.4	1	1	47.5395	29.5
DATA	277	4	22	0	0	A_44_P775974	NM_001024363	4136.58	209.573	4.959220e+000	2.965031e+000	64	28	8.352326e+000	0	0	0	0	0	0	4.81694	1	0	57.5363	29.6571
DATA	278	4	23	0	0	A_44_P503868	A_44_P503868	4162.09	209.896	1.814916e+003	1.815151e+002	1810	29	6.070553e+000	0	0	0	0	0	0	1766.24	1	1	46.8651	28.4194
DATA	279	4	24	0	0	A_64_P122541	A_64_P122541	4187.47	209.722	3.868175e+002	3.879127e+001	431	26.5	4.814001e+000	0	0	0	0	0	0	377.058	1	1	48.2044	27.2857
DATA	280	4	25	0	0	A_64_P080967	NM_001033890	4212.69	209.338	1.455600e+004	1.455603e+003	13924	25.5	7.243448e+000	0	0	0	0	0	0	14208.4	1	1	48.5334	27.0909
DATA	281	4	26	0	0	A_44_P1056309	NM_001105912	4238.42	209.573	2.538415e+001	3.857872e+000	84	26	4.609772e+000	0	0	0	0	0	0	24.81	1	1	57.5363	25.8
DATA	282	4	27	0	0	A_44_P199514	NM_001005564	4263.43	209.608	3.213877e+003	3.214008e+002	3050.5	28	7.361362e+000	0	0	0	0	0	0	3144.4	1	1	49.1849	27.7586
DATA	283	4	28	0	0	A_64_P097952	NM_001134962	4289	209.545	5.619537e+001	6.323590e+000	116	31	8.923871e+000	0	0	0	0	0	0	55.0256	1	1	55.8519	31.7241
DATA	284	4	29	0	0	A_42_P813939	NM_001108741	4314.3	209.9	2.494285e+003	2.494453e+002	2458.5	30	8.504648e+000	0	0	0	0	0	0	2443.98	1	1	47.2035	29.9355
DATA	285	4	30	0	0	A_64_P006423	NM_012584	4339.96	210.164	2.265717e+001	3.677430e+000	82	30	9.087106e+000	0	0	0	0	0	0	22.2101	1	1	46.5243	30.963
DATA	286	4	31	0	0	A_42_P670614	NM_001107097	4365.27	210.357	8.413235e+003	8.413285e+002	8107.5	28	6.110101e+000	0	0	0	0	0	0	8249.04	1	1	46.8651	28.1111
DATA	287	4	32	0	0	A_64_P084088	NM_001011954	4390.32	210.028	2.817610e+002	2.832454e+001	334	27	7.088155e+000	0	0	0	0	0	0	276.246	1	1	48.2044	29.875
DATA	288	4	33	0	0	A_64_P025643	XM_001073566	4415.91	209.614	3.243742e+002	3.256652e+001	383	30	7.521621e+000	0	0	0	0	0	0	317.938	1	1	57.259	31.3143
DATA	289	4	34	0	0	A_42_P719607	NM_153721	4441.85	209.706	2.851742e+001	4.065883e+000	87	27	6.369219e+000	0	0	0	0	0	0	27.9398	1	1	45.835	28.5185
DATA	290	4	35	0	0	A_42_P843603	NM_052800	4466.64	209.826	4.724082e+002	4.732974e+001	517	28	6.488527e+000	0	0	0	0	0	0	462.563	1	1	46.8651	28.3793
DATA	291	4	36	0	0	A_44_P234129	NM_001135802	4492.37	209.795	1.820710e+002	1.843696e+001	241	32	6.872050e+000	0	0	0	0	0	0	178.125	1	1	49.5074	30.0741
DATA	292	4	37	0	0	A_42_P701161	NM_001033666	4517.38	210	7.293766e+003	7.293824e+002	7058	31	9.189976e+000	0	0	0	0	0	0	7128.66	1	1	48.5334	33.2069
DATA	293	4	38	0	0	A_44_P1017335	NM_001108607	4543.07	209.989	8.812456e+003	8.812504e+002	8491	30	6.354577e+000	0	0	0	0	0	0	8602.25	1	1	52.0157	29.2258
DATA	294	4	39	0	0	A_44_P900209	CV121387	4568.44	209.973	8.370953e+001	8.863299e+000	141	29	6.144604e+000	0	0	0	0	0	0	81.5961	1	1	48.5334	29.4483
DATA	295	4	40	0	0	A_64_P037517	ENSRNOT00000014921	4593.76	209.986	3.073149e+001	4.237561e+000	91	25	5.603775e+000	0	0	0	0	0	0	29.9072	1	1	46.8651	26.6667
DATA	296	4	41	0	0	A_64_P128528	NM_001106013	4618.91	209.896	3.822545e+003	3.822657e+002	3768	29	7.124302e+000	0	0	0	0	0	0	3713.3	1	1	46.8651	29.4545
DATA	297	4	42	0	0	A_64_P378865	NM_001000706	4644.49	209.704	9.814353e+001	1.024207e+001	154.5	28	6.005837e+000	0	0	0	0	0	0	95.144	1	1	47.2035	28.1515
DATA	298	4	43	0	0	A_42_P553960	NM_001107831	4669.91	209.921	1.243737e+004	1.243741e+003	11757	31	7.995856e+000	0	0	0	0	0	0	12031.2	1	1	51.7088	30.6061
DATA	299	4	44	0	0	A_42_P717654	XM_001063683	4695	209.797	4.379339e+003	4.379438e+002	4190	31.5	7.868586e+000	0	0	0	0	0	0	4226.35	1	1	46.8651	31.3684
DATA	300	4	45	0	0	A_44_P295118	NM_001107228	4720.6	209.947	2.608039e+002	2.624666e+001	306.5	32	6.573652e+000	0	0	0	0	0	0	251.052	1	1	49.1849	30.2903
DATA	301	4	46	0	0	A_64_P049057	ENSRNOT00000014519	4745.74	210.041	1.606625e+003	1.606897e+002	1559	32	7.999547e+000	0	0	0	0	0	0	1542.41	1	1	48.2044	32.0833
DATA	302	4	47	0	0	A_42_P810287	NM_001004107	4771.56	210	2.368678e+003	2.368863e+002	2233	26	7.815735e+000	0	0	0	1	0	0	2267.3	1	1	49.8279	27.6667
DATA	303	4	48	0	0	A_42_P702729	NM_001107557	4796.76	210	2.081020e+003	2.081233e+002	1949	25	6.684295e+000	0	0	0	0	0	0	1985.9	1	1	46.8651	26.5862
DATA	304	4	49	0	0	A_42_P811084	NM_173147	4822.19	209.974	2.626086e+003	2.626256e+002	2438.5	27	6.419736e+000	0	0	0	0	0	0	2497.95	1	1	49.1849	28.3824
DATA	305	4	50	0	0	A_64_P151473	A_64_P151473	4847.63	210	2.464093e+004	2.464095e+003	23574	31	6.392725e+000	0	0	0	0	0	0	23359.3	1	1	46.5243	30.8125
DATA	306	4	51	0	0	A_44_P134634	ENSRNOT00000000260	4872.65	209.944	1.072554e+002	1.113873e+001	161	28	7.473269e+000	0	0	0	0	0	0	101.322	1	1	47.5395	28.7241
DATA	307	4	52	0	0	A_44_P178479	NM_001135039	4898.57	209.71	8.166221e+002	8.171793e+001	813	29	6.685231e+000	0	0	0	0	0	0	768.514	1	1	46.8651	29
DATA	308	4	53	0	0	A_64_P317400	ENSRNOT00000068382	4923.58	210.427	2.493740e+001	3.922861e+000	82	27.5	5.325391e+000	0	0	0	0	0	0	23.3825	1	1	65	27.7143
DATA	309	4	54	0	0	A_42_P781735	NM_053319	4949.42	210.427	8.517647e+004	8.517648e+003	79682	29.5	8.662563e+000	0	0	0	0	0	0	79542.9	1	1	57.5363	31
DATA	310	4	55	0	0	A_64_P144869	NM_017131	4974.78	210.444	2.062714e+002	2.085185e+001	253	29	9.115507e+000	0	0	0	0	0	0	191.84	1	1	51.0895	31.3226
DATA	311	4	56	0	0	A_44_P445484	ENSRNOT00000049980	4999.89	210.342	6.698918e+002	6.705930e+001	681.5	30	7.143426e+000	0	0	0	0	0	0	620.408	1	1	48.5334	29.8378
DATA	312	4	57	0	0	A_42_P487832	NM_001108389	5025.44	210.027	2.154337e+003	2.154557e+002	1975	27	6.999179e+000	0	0	0	1	0	0	1986.36	1	1	48.5334	28.3333
DATA	313	4	58	0	0	A_42_P482829	NM_001108138	5050.78	209.918	7.787557e+002	7.793698e+001	762	28	8.747437e+000	0	0	0	0	0	0	714.818	1	1	47.8731	29.2
DATA	314	4	59	0	0	A_64_P101440	XM_001065775	5076.42	210.427	3.119588e+000	3.109194e+000	61	34	5.966669e+000	0	0	0	0	0	0	0.952546	0	0	57.5363	33.2963
DATA	315	4	60	0	0	A_64_P072268	NM_001002277	5101.65	209.841	7.341319e+002	7.347956e+001	739	29	7.599781e+000	0	0	0	0	0	0	667.614	1	1	44.7812	31.44
DATA	316	4	61	0	0	A_42_P589190	NM_023104	5127	210.455	1.004751e+003	1.005241e+002	938	29	6.788962e+000	0	0	0	0	0	0	909.46	1	1	55.8519	30.56
DATA	317	4	62	0	0	A_64_P027328	A_64_P027328	5152.42	210.427	3.619676e+002	3.633376e+001	385	31.5	9.993759e+000	0	0	0	0	0	0	326.041	1	1	57.5363	33.0588
DATA	318	4	63	0	0	A_42_P788541	NM_001106794	5177.81	210.533	6.367579e+003	6.367658e+002	5529	26.5	7.297378e+000	0	0	0	1	0	0	5707.32	1	1	49.5074	27.3
DATA	319	4	64	0	0	A_42_P457003	NM_012802	5202.99	210.384	5.414017e+003	5.414111e+002	4635	29	6.138089e+000	0	0	0	0	0	0	4828.33	1	1	48.8603	28.6364
DATA	320	4	65	0	0	A_64_P095695	A_64_P095695	5228.7	210.406	9.215880e+001	9.755733e+000	139.5	28	4.587501e+000	0	0	0	0	0	0	81.766	1	1	46.8651	27.3871
DATA	321	4	66	0	0	A_42_P463880	NM_001013927	5253.89	210.5	5.625179e+001	6.479939e+000	109	29	7.836338e+000	0	0	0	0	0	0	49.6542	1	1	65	29.5294
DATA	322	4	67	0	0	A_43_P20354	NM_001134574	5279.72	210.095	1.114867e+002	1.160827e+001	158	26	7.456541e+000	0	0	0	0	0	0	97.8818	1	1	48.8603	29
DATA	323	4	68	0	0	A_64_P055958	ENSRNOT00000056114	5304.67	210.5	4.043815e+001	5.188291e+000	96	30	5.727128e+000	0	0	0	0	0	0	35.3235	1	1	57.5363	29.4
DATA	324	4	69	0	0	A_64_P159044	ENSRNOT00000040690	5330.33	210.5	1.044577e+003	1.045088e+002	1004.5	32	7.486441e+000	0	0	0	0	0	0	907.587	1	1	57.5363	32.7586
DATA	325	4	70	0	0	A_44_P473234	ENSRNOT00000024858	5355.5	210.5	7.066639e+002	7.074272e+001	655.5	33	7.243229e+000	0	0	0	0	0	0	610.76	1	1	57.5363	33.1333
DATA	326	4	71	0	0	A_42_P797965	NM_001108497	5380.89	210.5	9.739518e+002	9.745116e+001	886	28.5	9.717859e+000	0	0	0	0	0	0	837.29	1	1	56.9804	30.3333
DATA	327	4	72	0	0	A_42_P592157	NM_001002828	5406.5	210.5	2.789864e+002	2.809558e+001	294	30	6.126094e+000	0	0	0	1	0	0	238.55	1	1	49.1849	30.0645
DATA	328	4	73	0	0	A_64_P016419	NM_001000622	5431.58	210.573	3.699554e+001	4.983025e+000	93.5	31	7.373627e+000	0	0	0	0	0	0	31.4672	1	1	57.5363	30
DATA	329	4	74	0	0	A_44_P306863	XM_344447	5457.11	210.5	1.171363e+003	1.171844e+002	1030	30	8.719352e+000	0	0	0	0	0	0	990.971	1	1	56.9804	30.2069
DATA	330	4	75	0	0	A_42_P471835	TC610276	5482.51	210.36	3.819364e+003	3.819513e+002	3087	33	8.595929e+000	0	0	0	0	0	0	3213.91	1	1	49.8279	31.84
DATA	331	4	76	0	1	ETG02_36680	ETG02_36680	5507.67	210.5	9.905641e+000	3.533605e+000	67	31	8.630778e+000	0	0	0	0	0	0	8.29206	1	0	57.5363	31.0968
DATA	332	4	77	66	1	DarkCorner	DarkCorner	5533.42	210.573	3.423307e+000	3.409983e+000	55.5	30	1.071789e+001	0	0	0	0	0	0	-2.85714	0	0	57.5363	29.8387
DATA	333	4	78	66	1	DarkCorner	DarkCorner	5558.58	210.573	3.441012e+000	3.427619e+000	57	26.5	7.423739e+000	0	0	0	0	0	0	-1.81509	0	0	57.5363	27.2813
DATA	334	4	79	66	1	DarkCorner	DarkCorner	5584	210.545	3.458812e+000	3.445350e+000	56	31	7.729892e+000	0	0	0	0	0	0	-1.81144	0	0	55.8519	31.4138
DATA	335	4	80	66	1	DarkCorner	DarkCorner	5609.42	210.573	3.476408e+000	3.462878e+000	57.5	28	7.782986e+000	0	0	0	0	0	0	-1.18823	0	0	57.5363	29.0294
DATA	336	4	81	66	1	DarkCorner	DarkCorner	5635.26	210.441	3.494261e+000	3.480661e+000	59	32.5	8.540404e+000	0	0	0	0	0	0	-0.00936943	0	0	46.8651	31.0294
DATA	337	4	82	66	1	DarkCorner	DarkCorner	5660.42	210.573	3.511144e+000	3.497478e+000	58	27.5	4.006488e+000	0	0	0	0	0	0	-1.26282	0	0	57.5363	28.3636
DATA	338	4	83	66	1	DarkCorner	DarkCorner	5686.2	210.232	4.846859e+000	3.548183e+000	60	28	6.505581e+000	0	0	0	0	0	0	3.91535	1	0	46.1809	28.4516
DATA	339	4	84	66	1	DarkCorner	DarkCorner	5711.16	210.392	3.544784e+000	3.530988e+000	59	27	6.490233e+000	0	0	0	0	0	0	-0.338724	0	0	50.1463	27.6486
DATA	340	4	85	66	1	DarkCorner	DarkCorner	5736.75	210.593	1.389845e+001	3.809612e+000	70	26	7.098638e+000	0	0	0	1	0	0	11.1257	1	0	51.0895	26.7573
DATA	341	5	1	66	1	DarkCorner	DarkCorner	3590.58	216.427	7.651135e+000	3.273506e+000	65	25	6.506659e+000	0	0	0	0	0	0	6.82555	1	0	57.5363	25.5094
DATA	342	5	2	66	1	DarkCorner	DarkCorner	3615.93	216.282	3.736832e+000	3.186763e+000	62	29.5	7.197663e+000	0	0	0	0	0	0	3.35263	1	0	47.2035	29.7222
DATA	343	5	3	66	1	DarkCorner	DarkCorner	3641.44	216.312	3.159322e+000	3.147204e+000	61	31	7.372719e+000	0	0	0	0	0	0	0.302048	0	0	49.8279	30.9032
DATA	344	5	4	66	1	DarkCorner	DarkCorner	3667.01	216.306	3.142051e+000	3.129822e+000	57	28	7.224241e+000	0	0	0	0	0	0	-0.743511	0	0	47.8731	28.7586
DATA	345	5	5	66	1	DarkCorner	DarkCorner	3691.88	216.654	3.125574e+000	3.113464e+000	60	27	6.367445e+000	0	0	0	0	0	0	0.168193	0	0	50.4627	26.8125
DATA	346	5	6	66	1	DarkCorner	DarkCorner	3718.16	216.469	3.109125e+000	3.097024e+000	60	28	6.999564e+000	0	0	0	0	0	0	-1.9328	0	0	51.0895	28.6098
DATA	347	5	7	66	1	DarkCorner	DarkCorner	3742.85	216.432	3.094146e+000	3.082103e+000	59	30	8.774543e+000	0	0	0	0	0	0	-1.30372	0	0	48.5334	31.2759
DATA	348	5	8	66	1	DarkCorner	DarkCorner	3768.5	216.5	3.079105e+000	3.067121e+000	59.5	23	8.003622e+000	0	0	0	0	0	0	-1.04267	0	0	57.5363	25.8333
DATA	349	5	9	66	1	DarkCorner	DarkCorner	3793.41	216.275	3.065246e+000	3.053316e+000	55	29.5	8.268483e+000	0	0	0	0	0	0	-5.89357	0	0	50.7771	28.6667
DATA	350	5	10	0	0	A_43_P17919	XM_001070979	3819.33	216.5	4.016631e+001	5.036922e+000	96	28	8.592355e+000	0	0	0	0	0	0	37.5246	1	1	57.5363	29.3714
DATA	351	5	11	0	0	A_42_P826221	NM_012933	3844.5	216.5	8.117020e+003	8.117077e+002	7348.5	25.5	8.773589e+000	0	0	0	0	0	0	7615.49	1	1	49.1849	26.3
DATA	352	5	12	0	0	A_64_P011524	NM_001194951	3869.72	216.559	5.375365e+002	5.383808e+001	560	28	7.987697e+000	0	0	0	0	0	0	506.393	1	1	46.8651	28.5946
DATA	353	5	13	0	0	A_44_P258417	NM_001009699	3895.42	216.573	8.337953e+001	8.861929e+000	142.5	30.5	7.768180e+000	0	0	0	0	0	0	78.8618	1	1	57.5363	30.2308
DATA	354	5	14	0	0	A_64_P164617	A_64_P164617	3920.58	216.573	6.443232e+004	6.443233e+003	61631	28.5	9.188371e+000	0	0	0	0	0	0	61167.5	1	1	57.5363	30.8846
DATA	355	5	15	0	0	A_42_P758933	NM_001106476	3945.82	216.662	8.019615e+003	8.019670e+002	7401	29	7.577130e+000	0	0	0	1	0	0	7640.31	1	1	49.1849	30.7097
DATA	356	5	16	0	0	A_42_P573312	NM_001134761	3971.22	216.903	7.223240e+002	7.229344e+001	739.5	26.5	7.699636e+000	0	0	0	0	0	0	690.505	1	1	47.5395	26.3929
DATA	357	5	17	0	0	A_64_P096257	NM_001160228	3997	216.528	8.983744e+002	8.988622e+001	878.5	28	7.429751e+000	0	0	0	0	0	0	861.511	1	1	48.5334	28.5135
DATA	358	5	18	0	0	A_43_P15847	NM_178847	4022.42	216.573	5.364859e+001	6.123442e+000	110.5	27	7.438638e+000	0	0	0	0	0	0	51.6006	1	1	57.5363	28.4444
DATA	359	5	19	0	0	A_64_P139962	NM_001000675	4047.58	216.573	8.118490e+000	3.053889e+000	69	29	8.333287e+000	0	0	0	0	0	0	7.83003	1	0	57.5363	31.0667
DATA	360	5	20	0	0	A_64_P117474	NM_001000646	4072.96	216.589	2.947918e+000	2.938333e+000	59	28.5	8.068386e+000	0	0	0	0	0	0	1.01845	0	0	48.5334	29.7333
DATA	361	5	21	0	1	ERCC-00075_180	ERCC-00075_180	4098.5	216.648	3.182584e+001	4.325558e+000	90.5	29.5	6.854900e+000	0	0	0	0	0	0	30.8476	1	1	57.5363	29.1
DATA	362	5	22	0	0	A_42_P740730	NM_001012136	4123.91	216.614	2.394885e+001	3.778907e+000	80.5	32	7.645727e+000	0	0	0	0	0	0	23.2629	1	1	57.259	32.6667
DATA	363	5	23	0	0	A_42_P702258	NM_017227	4149.44	216.973	3.038436e+001	4.212164e+000	88	28	7.531877e+000	0	0	0	0	0	0	29.5737	1	1	49.1849	29.3333
DATA	364	5	24	0	0	A_42_P668800	NM_001127553	4174.63	217	1.704642e+003	1.704891e+002	1645	29	6.613578e+000	0	0	0	0	0	0	1662.05	1	1	48.5334	28.9643
DATA	365	5	25	0	0	A_42_P842513	NM_031077	4200.29	216.754	4.060432e+003	4.060536e+002	3939.5	31	7.562407e+000	0	0	0	0	0	0	3965	1	1	45.1352	28.76
DATA	366	5	26	0	0	A_64_P047697	NM_001161835	4225.44	216.882	2.474694e+002	2.491673e+001	298.5	25	7.015449e+000	0	0	0	0	0	0	241.977	1	1	47.2035	25.2963
DATA	367	5	27	0	0	A_42_P660036	NM_001134727	4250.7	216.9	2.086272e+002	2.106339e+001	259.5	28	6.405126e+000	0	0	0	0	0	0	204.227	1	1	47.2035	27.7778
DATA	368	5	28	0	0	A_64_P095050	A_64_P095050	4276.5	217	6.176076e+004	6.176076e+003	60242	29	8.821929e+000	0	0	0	0	0	0	60515.3	1	1	54.1152	30.9667
DATA	369	5	29	0	0	A_42_P561835	ENSRNOT00000043937	4301.7	216.9	2.261415e+002	2.279880e+001	283.5	30	9.839166e+000	0	0	0	0	0	0	221.734	1	1	47.2035	31.4667
DATA	370	5	30	0	0	A_64_P098774	ENSRNOT00000002068	4327	217	2.147808e+001	3.604204e+000	80	30.5	8.151590e+000	0	0	0	0	0	0	21.0703	1	1	54.9904	30.6786
DATA	371	5	31	0	0	A_64_P163184	NM_001107855	4352.5	217.056	6.428175e+002	6.434683e+001	665	25.5	5.622312e+000	0	0	0	0	0	0	630.806	1	1	48.5334	26.0909
DATA	372	5	32	0	0	A_42_P549675	NM_080577	4377.63	217.127	4.481397e+003	4.481490e+002	4275	32	6.252466e+000	0	0	0	0	0	0	4398.09	1	1	47.5395	31.52
DATA	373	5	33	0	0	A_64_P287740	NM_001127601	4403.5	217	5.897142e+001	6.568795e+000	117	28	7.617002e+000	0	0	0	0	0	0	57.8672	1	1	65	30.2647
DATA	374	5	34	0	0	A_64_P059545	NM_053477	4428.92	217.015	5.989566e+003	5.989635e+002	5916	32.5	7.728247e+000	0	0	0	0	0	0	5875.51	1	1	46.8651	32.125
DATA	375	5	35	0	0	A_44_P465856	NM_199398	4454	217	1.112116e+001	3.102220e+000	72	29	5.222537e+000	0	0	0	0	0	0	10.9037	1	0	65	28.6818
DATA	376	5	36	0	0	A_42_P714075	NM_031723	4479.5	217	7.807349e+002	7.812726e+001	822	29	6.352940e+000	0	0	0	0	0	0	764.907	1	1	54.1152	28.2121
DATA	377	5	37	0	0	A_42_P605265	NM_053677	4504.98	217.106	3.301939e+001	4.395171e+000	94	32	7.122230e+000	0	0	0	0	0	0	32.3203	1	1	46.8651	30.6154
DATA	378	5	38	0	0	A_64_P047401	NM_001009369	4530.23	217.116	3.507304e+003	3.507424e+002	3494	32	9.012536e+000	0	0	0	0	0	0	3429.2	1	1	46.5243	32.6774
DATA	379	5	39	0	0	A_64_P018891	A_64_P018891	4555.5	217	1.143211e+002	1.179616e+001	171.5	28.5	6.686846e+000	0	0	0	0	0	0	111.626	1	1	54.1152	28.7941
DATA	380	5	40	0	0	A_64_P026297	NM_022583	4581.14	217.014	4.339221e+001	5.225988e+000	104	27	5.654333e+000	0	0	0	0	0	0	42.3044	1	1	46.8651	28.2941
DATA	381	5	41	0	0	A_43_P13508	NM_001015031	4606.22	216.908	3.336151e+001	4.431815e+000	89.5	29	6.353115e+000	0	0	0	0	0	0	32.4698	1	1	45.835	28.8276
DATA	382	5	42	0	0	A_64_P077426	XM_001080794	4631.81	216.871	1.477727e+004	1.477730e+003	14176.5	32	7.014032e+000	0	0	0	0	0	0	14354.7	1	1	46.8651	31.5429
DATA	383	5	43	0	0	A_44_P370175	NM_031773	4657.42	217.427	6.836996e+001	7.437949e+000	127	27	7.538075e+000	0	0	0	0	0	0	66.2802	1	1	57.5363	29.375
DATA	384	5	44	0	0	A_64_P084288	NM_001000496	4682.58	217.427	1.269910e+001	3.198429e+000	72.5	33	8.453608e+000	0	0	0	0	0	0	12.2833	1	0	65	33.7222
DATA	385	5	45	0	0	A_44_P400936	A_44_P400936	4708	217.455	2.707660e+002	2.723604e+001	327	32	7.514850e+000	0	0	0	0	0	0	261.259	1	1	55.8519	31.1622
DATA	386	5	46	0	0	A_64_P019599	NM_012713	4733.25	217.191	1.985458e+002	2.007261e+001	249.5	31	7.012809e+000	0	0	0	0	0	0	191.068	1	1	46.1809	31.4444
DATA	387	5	47	0	0	A_44_P644356	AI556299	4758.21	217.417	2.558495e+001	3.911385e+000	84	28	7.901635e+000	0	0	0	0	0	0	24.5545	1	1	47.8731	29.4412
DATA	388	5	48	0	0	A_64_P057076	A_64_P057076	4784.62	217.309	1.165829e+002	1.203010e+001	173	28	7.421845e+000	0	0	0	0	0	0	111.541	1	1	51.0895	28.6471
DATA	389	5	49	0	0	A_64_P087392	NM_001108764	4809.58	217.427	1.424093e+002	1.454874e+001	198.5	27	5.928250e+000	0	0	0	0	0	0	135.833	1	1	57.5363	27.7813
DATA	390	5	50	0	0	A_44_P436604	NM_001025627	4835	217.455	1.940769e+001	3.561855e+000	78	30.5	6.876008e+000	0	0	0	0	0	0	18.4507	1	1	55.8519	30.05
DATA	391	5	51	0	0	A_43_P23200	NM_001107832	4860.46	217.309	3.103389e+002	3.117827e+001	349	28	7.306478e+000	0	0	0	0	0	0	294.01	1	1	46.8651	29.3333
DATA	392	5	52	0	0	A_42_P515876	NM_031097	4885.69	217.338	6.436952e+002	6.443976e+001	663	28.5	6.720701e+000	0	0	0	0	0	0	607.651	1	1	48.5334	29.0667
DATA	393	5	53	0	0	A_44_P1047924	NM_053523	4911.13	217.5	4.049136e+003	4.049249e+002	3711.5	27	5.966656e+000	0	0	0	0	0	0	3808.17	1	1	49.8279	27.3793
DATA	394	5	54	0	0	A_44_P682668	NM_001014228	4936.76	217.467	1.334853e+002	1.368831e+001	187	28	5.179128e+000	0	0	0	0	0	0	125.049	1	1	49.1849	27.8519
DATA	395	5	55	0	0	A_64_P061489	NM_001108746	4961.89	217.5	1.308613e+001	3.312472e+000	73	28	8.123628e+000	0	0	0	0	0	0	12.2104	1	0	56.9804	29.08
DATA	396	5	56	0	0	A_64_P047747	NM_182474	4987.61	217.594	2.115741e+003	2.115961e+002	2021	29	6.374369e+000	0	0	0	0	0	0	1965.9	1	1	47.5395	29.4848
DATA	397	5	57	0	0	A_64_P091163	NM_001107083	5013.27	217.324	3.792565e+001	4.878882e+000	96	27.5	7.348469e+000	0	0	0	0	0	0	35.0861	1	1	47.8731	28.75
DATA	398	5	58	0	0	A_64_P133992	NM_001008825	5038.11	217.5	1.698463e+002	1.726205e+001	218	29	7.138721e+000	0	0	0	0	0	0	156.46	1	1	56.9804	29.7429
DATA	399	5	59	0	0	A_42_P503768	NM_001009466	5063.5	217.5	3.433232e+002	3.447166e+001	372	34	8.885957e+000	0	0	0	0	0	0	314.841	1	1	57.5363	33.0909
DATA	400	5	60	0	0	A_44_P400346	ENSRNOT00000059540	5088.67	217.5	7.558967e+001	8.173916e+000	132	31	6.870907e+000	0	0	0	0	0	0	69.0025	1	1	65	30.931
DATA	401	5	61	0	0	A_64_P128438	NM_012591	5114.31	217.507	2.809782e+003	2.809955e+002	2447	29	6.575228e+000	0	0	0	0	0	0	2552.75	1	1	49.1849	29.1852
DATA	402	5	62	0	0	A_44_P531758	NM_012935	5139.58	217.573	3.761061e+004	3.761063e+003	32936	32	8.744456e+000	0	0	0	0	0	0	34007.4	1	1	57.5363	33.5862
DATA	403	5	63	0	0	A_43_P10257	NM_203335	5164.85	217.616	7.639540e+003	7.639605e+002	6677	31	9.636852e+000	0	0	0	0	0	0	6874.18	1	1	48.5334	32.3143
DATA	404	5	64	0	0	A_64_P011744	NM_001108789	5190.51	217.676	4.231862e+002	4.243729e+001	437	28.5	3.589607e+000	0	0	0	0	0	0	378.886	1	1	49.1849	28.1364
DATA	405	5	65	0	0	A_44_P282794	NM_001107523	5215.67	217.5	3.419855e+001	4.674903e+000	90.5	28	5.530359e+000	0	0	0	0	0	0	30.465	1	1	65	29.3429
DATA	406	5	66	0	0	A_42_P463784	NM_001008526	5241.63	217.5	1.524522e+003	1.524859e+002	1383.5	28	7.414625e+000	0	0	0	1	0	0	1351.02	1	1	52.3208	28.68
DATA	407	5	67	0	0	A_42_P630463	NM_022238	5266.53	217.421	3.727150e+002	3.741036e+001	382.5	28	6.827893e+000	0	0	0	1	0	0	328.625	1	1	49.8279	29.1351
DATA	408	5	68	0	0	A_64_P006728	NM_001108905	5292.18	217.493	3.378791e+003	3.378946e+002	2983.5	30	6.476591e+000	0	0	0	0	0	0	2963.51	1	1	47.8731	30.7097
DATA	409	5	69	0	0	A_44_P360629	NM_001000030	5317.49	218.154	1.024567e+002	1.074993e+001	150	31.5	5.079219e+000	0	0	0	0	0	0	89.4081	1	1	45.1352	30.9615
DATA	410	5	70	0	0	A_64_P024620	NM_001006995	5342.64	218.129	2.453041e+004	2.453043e+003	20767	33	7.085087e+000	0	0	0	0	0	0	21294.6	1	1	46.8651	33.9615
DATA	411	5	71	0	0	A_64_P091194	ENSRNOT00000049254	5368.3	217.9	1.496693e+004	1.496696e+003	12842	28.5	8.393355e+000	0	0	0	0	0	0	12922.7	1	1	47.2035	30.3214
DATA	412	5	72	0	0	A_44_P334922	NM_022379	5393.58	217.573	8.216390e+000	3.406813e+000	67.5	30	7.870593e+000	0	0	0	0	0	0	7.05621	1	0	57.5363	30.7097
DATA	413	5	73	0	0	A_42_P482051	XM_001059157	5419	217.545	1.592700e+003	1.593047e+002	1387.5	30.5	7.722767e+000	0	0	0	1	0	0	1360.54	1	1	55.8519	30.3125
DATA	414	5	74	0	0	A_42_P674742	XM_002726367	5444.5	217.735	8.403746e+003	8.403812e+002	7020.5	32	9.790918e+000	0	0	0	0	0	0	7140.9	1	1	46.5243	33
DATA	415	5	75	0	0	A_64_P105211	XM_233310	5469.58	217.573	2.998278e+001	4.502646e+000	84	29	8.827579e+000	0	0	0	0	0	0	25.3433	1	1	57.5363	31.6154
DATA	416	5	76	0	0	A_64_P058523	NM_134385	5495.42	217.573	1.250525e+001	3.601341e+000	69	31	7.365460e+000	0	0	0	0	0	0	10.5137	1	0	57.5363	31
DATA	417	5	77	0	0	A_44_P586876	NM_001100805	5520.5	218	1.816618e+003	1.816935e+002	1547	31	9.815782e+000	0	0	0	0	0	0	1519.59	1	1	48.5334	32.6571
DATA	418	5	78	66	1	DarkCorner	DarkCorner	5545.91	217.935	3.425464e+000	3.412131e+000	54.5	29.5	7.855081e+000	0	0	0	0	0	0	-3.43557	0	0	54.4085	29.5667
DATA	419	5	79	66	1	DarkCorner	DarkCorner	5571.46	218.165	3.443001e+000	3.429600e+000	57	29.5	7.051208e+000	0	0	0	0	0	0	-1.46586	0	0	49.5074	28.7333
DATA	420	5	80	66	1	DarkCorner	DarkCorner	5596.7	218.134	3.460428e+000	3.446960e+000	58	28	6.308543e+000	0	0	0	0	0	0	-2.44418	0	0	45.835	29.4815
DATA	421	5	81	66	1	DarkCorner	DarkCorner	5622.44	218	3.478122e+000	3.470992e+000	60	31	8.683995e+000	0	0	0	0	0	0	1.72757	0	0	47.8731	30
DATA	422	5	82	66	1	DarkCorner	DarkCorner	5647.83	217.855	3.495371e+000	3.481766e+000	57	29	6.989260e+000	0	0	0	0	0	0	-2.78788	0	0	46.5243	30.2759
DATA	423	5	83	66	1	DarkCorner	DarkCorner	5673.36	218.149	3.512021e+000	3.498356e+000	60	27	3.986226e+000	0	0	0	0	0	0	0.0445853	0	0	48.5334	27.84
DATA	424	5	84	66	1	DarkCorner	DarkCorner	5698.49	218.07	3.528473e+000	3.514921e+000	58	29	6.511699e+000	0	0	0	0	0	0	0.287913	0	0	47.8731	28.7188
DATA	425	5	85	66	1	DarkCorner	DarkCorner	5724.08	217.916	4.837029e+000	3.564139e+000	61	27	5.996456e+000	0	0	0	0	0	0	3.88944	1	0	46.8651	27.2041
DATA	426	6	1	66	1	DarkCorner	DarkCorner	3603.5	224	3.180330e+000	3.167966e+000	60	28	7.736278e+000	0	0	0	0	0	0	0.0859356	0	0	54.1152	28.4167
DATA	427	6	2	66	1	DarkCorner	DarkCorner	3628.5	224	3.162789e+000	3.150479e+000	56	29.5	8.494152e+000	0	0	0	0	0	0	-1.56233	0	0	54.1152	28.9706
DATA	428	6	3	66	1	DarkCorner	DarkCorner	3654.39	223.931	3.145229e+000	3.132987e+000	58	27.5	7.113126e+000	0	0	0	0	0	0	-0.510355	0	0	53.8203	28.6786
DATA	429	6	4	66	1	DarkCorner	DarkCorner	3679.71	223.771	3.128674e+000	3.116497e+000	60	29	9.655369e+000	0	0	0	0	0	0	-0.883428	0	0	47.2035	30.8846
DATA	430	6	5	66	1	DarkCorner	DarkCorner	3705	224	3.112444e+000	3.100330e+000	58	29	7.020019e+000	0	0	0	0	0	0	-2.79091	0	0	54.9904	27.8857
DATA	431	6	6	66	1	DarkCorner	DarkCorner	3730.11	223.952	3.097068e+000	3.085014e+000	57	26.5	6.779279e+000	0	0	0	0	0	0	-3.10223	0	0	50.7771	27.2
DATA	432	6	7	66	1	DarkCorner	DarkCorner	3755.52	224.342	3.081809e+000	3.069815e+000	58	30	1.015366e+001	0	0	0	0	0	0	-2.36764	0	0	47.8731	30.25
DATA	433	6	8	66	1	DarkCorner	DarkCorner	3781.09	224.065	6.453796e+000	3.122928e+000	65	26	8.444545e+000	0	0	0	0	0	0	5.99731	1	0	54.4085	26.8966
DATA	434	6	9	0	0	A_64_P034324	NM_001108282	3806.5	224	5.184757e+001	6.011158e+000	105	29	9.197460e+000	0	0	0	0	0	0	48.3982	1	1	54.1152	30.7714
DATA	435	6	10	0	0	A_64_P071506	ENSRNOT00000025007	3831.91	224.065	3.035953e+001	4.288235e+000	89	27	7.435856e+000	0	0	0	0	0	0	28.4636	1	1	65	28.1333
DATA	436	6	11	0	0	A_64_P050705	NM_001106061	3857.2	224.169	1.104948e+002	1.145367e+001	163	27	5.548874e+000	0	0	0	0	0	0	104.028	1	1	43.7019	27.04
DATA	437	6	12	0	0	A_64_P032242	NM_001008898	3882.51	224.104	1.146455e+001	3.215314e+000	69	32	8.097930e+000	0	0	0	0	0	0	10.8364	1	0	49.1849	29.8
DATA	438	6	13	0	0	A_42_P730320	NM_001013877	3908.09	224.065	6.677271e+001	7.317171e+000	125.5	30	7.608299e+000	0	0	0	0	0	0	63.3564	1	1	54.4085	30.1
DATA	439	6	14	0	0	A_64_P123073	A_64_P123073	3933.26	224.026	3.514002e+002	3.526631e+001	392	31	8.837978e+000	0	0	0	0	0	0	334.618	1	1	49.1849	32.8788
DATA	440	6	15	0	0	A_64_P064709	NM_001166303	3958.81	224.054	6.821652e+001	7.440754e+000	127	30	7.205806e+000	0	0	0	0	0	0	65.1835	1	1	47.8731	29.931
DATA	441	6	16	0	0	A_44_P123381	NM_013012	3983.78	224.053	7.050173e+000	3.044811e+000	68	26	7.652368e+000	0	0	0	0	0	0	6.7582	1	0	49.1849	27.1111
DATA	442	6	17	0	0	A_44_P557487	NM_053617	4009.32	223.794	1.512237e+001	3.317799e+000	75	27	7.373047e+000	0	0	0	0	0	0	14.54	1	1	46.5243	28.8519
DATA	443	6	18	0	0	A_64_P084971	NM_017007	4035	224.455	5.346638e+004	5.346639e+003	50774.5	29.5	7.593073e+000	0	0	0	0	0	0	51561	1	1	55.8519	30.1071
DATA	444	6	19	0	0	A_42_P770556	NM_033096	4060.48	223.812	7.071357e+003	7.071418e+002	6660	32	8.503954e+000	0	0	0	1	0	0	6836.81	1	1	47.2035	32.6
DATA	445	6	20	0	0	A_64_P023381	XM_001073278	4085.58	224.427	5.224403e+001	5.989654e+000	111	27	7.747473e+000	0	0	0	0	0	0	50.6383	1	1	57.5363	29.24
DATA	446	6	21	0	0	A_64_P059217	NM_053667	4111.42	224.427	2.722326e+002	2.737970e+001	322	35	6.348500e+000	0	0	0	0	0	0	264.469	1	1	57.5363	34.8
DATA	447	6	22	0	0	A_44_P286215	NM_001008885	4136.62	224.5	1.140484e+002	1.177193e+001	169	31.5	7.175629e+000	0	0	0	0	0	0	111.022	1	1	49.8279	31.6
DATA	448	6	23	0	0	A_64_P138056	A_64_P138056	4161.86	224.357	4.461795e+002	4.471285e+001	489	30	4.871805e+000	0	0	0	0	0	0	435.124	1	1	46.8651	29.7
DATA	449	6	24	0	0	A_44_P280799	NM_001000654	4187.62	224.532	1.650772e+001	3.342702e+000	76	29	7.288009e+000	0	0	0	0	0	0	16.1258	1	1	50.1463	29.8214
DATA	450	6	25	0	0	A_64_P111599	NM_001191586	4212.6	224.147	5.542560e+002	5.550156e+001	594	28	8.257724e+000	0	0	0	0	0	0	542.162	1	1	48.8603	27.76
DATA	451	6	26	0	0	A_64_P088635	ENSRNOT00000059643	4238.42	224.427	2.228794e+001	3.656753e+000	83	26	7.004284e+000	0	0	0	0	0	0	21.8295	1	1	57.5363	25.5
DATA	452	6	27	0	0	A_64_P042332	NM_021860	4263.58	224.427	2.907431e+000	2.896168e+000	60	29	6.869975e+000	0	0	0	0	0	0	0.171639	0	0	57.5363	29.9
DATA	453	6	28	0	0	A_42_P599080	NM_053753	4289	224.455	7.920728e+001	8.432783e+000	137.5	28	9.024999e+000	0	0	0	0	0	0	77.719	1	1	55.8519	30.0313
DATA	454	6	29	0	0	A_44_P576954	NM_001106645	4314.47	224.421	3.391472e+002	3.403781e+001	384	30	8.474389e+000	0	0	0	0	0	0	332.973	1	1	49.8279	30.3793
DATA	455	6	30	0	0	A_64_P046687	A_64_P046687	4339.57	224.605	6.017626e+003	6.017696e+002	5880	27.5	5.421208e+000	0	0	0	0	0	0	5910.52	1	1	49.5074	27.2083
DATA	456	6	31	0	0	A_42_P694928	NM_001109046	4365.23	224.338	3.829222e+002	3.840115e+001	425	28	5.791503e+000	0	0	0	0	0	0	376.164	1	1	48.8603	28.2174
DATA	457	6	32	0	0	A_64_P032811	NM_001134575	4390.5	224.5	5.423257e+001	6.145414e+000	114	28	5.796365e+000	0	0	0	0	0	0	53.2756	1	1	57.5363	28.7419
DATA	458	6	33	0	0	A_64_P141070	ENSRNOT00000058701	4415.96	223.765	8.662808e+001	9.132580e+000	145.5	31	7.825274e+000	0	0	0	0	0	0	85.0721	1	1	46.1809	31.7222
DATA	459	6	34	0	0	A_64_P093462	NM_001108129	4441.35	224.205	2.165430e+004	2.165431e+003	20981	31	6.812044e+000	0	0	0	0	0	0	21257.5	1	1	51.0895	30.7586
DATA	460	6	35	0	0	A_42_P799306	ENSRNOT00000015782	4466.47	224.081	5.038236e+001	5.810371e+000	108	31	6.485009e+000	0	0	0	0	0	0	49.4278	1	1	48.5334	29.3478
DATA	461	6	36	0	0	A_42_P726743	NM_001108985	4492	224.191	9.992627e+002	9.996825e+001	999	30	6.462079e+000	0	0	0	0	0	0	979.529	1	1	46.8651	29.6176
DATA	462	6	37	0	0	A_44_P228341	NM_001025701	4517.32	224.6	2.161549e+003	2.161743e+002	2077	33	7.030546e+000	0	0	0	0	0	0	2116.81	1	1	50.7771	33
DATA	463	6	38	0	0	A_42_P571433	NM_031059	4543	224.785	2.470057e+003	2.470228e+002	2391	31	7.081041e+000	0	0	0	0	0	0	2416.01	1	1	49.8279	29.5676
DATA	464	6	39	0	0	A_44_P132783	NM_214833	4568.42	224.573	1.291356e+002	1.323675e+001	188	30.5	6.653708e+000	0	0	0	0	0	0	126.127	1	1	57.5363	31.0294
DATA	465	6	40	0	0	A_44_P119215	NM_001108941	4593.58	224.573	2.534029e+001	3.860015e+000	85	30.5	6.046885e+000	0	0	0	0	0	0	24.7104	1	1	65	28.75
DATA	466	6	41	0	0	A_44_P124259	XM_345871	4619.11	224.5	2.218546e+001	3.664868e+000	81.5	31	7.289488e+000	0	0	0	0	0	0	21.5947	1	1	56.9804	31.4054
DATA	467	6	42	0	0	A_44_P422063	NM_001107631	4644.24	224.5	8.411200e+001	8.904556e+000	142	31	8.461141e+000	0	0	0	0	0	0	81.7115	1	1	47.2035	30.8182
DATA	468	6	43	0	0	A_44_P1033023	NM_013063	4669.73	224.284	8.496692e+003	8.496743e+002	7906.5	34	9.554287e+000	0	0	0	0	0	0	8236	1	1	48.8603	34.1071
DATA	469	6	44	0	0	A_64_P121618	NM_001134542	4695.42	224.573	2.922088e+002	2.936802e+001	347	32	9.197777e+000	0	0	0	0	0	0	282.582	1	1	57.5363	32.8919
DATA	470	6	45	0	0	A_64_P042188	ENSRNOT00000034890	4720.82	224.632	9.960058e+003	9.960102e+002	9596.5	33	6.541517e+000	0	0	0	0	0	0	9607.66	1	1	49.5074	34.2353
DATA	471	6	46	0	0	A_42_P561616	AI234869	4746.36	224.434	8.930548e+002	8.935425e+001	878.5	31	7.810663e+000	0	0	0	0	0	0	859.094	1	1	49.8279	31.1613
DATA	472	6	47	0	0	A_42_P588606	NM_001134544	4771.41	224.759	2.428873e+002	2.446841e+001	288	27.5	7.749111e+000	0	0	0	0	0	0	233.001	1	1	50.4627	28.45
DATA	473	6	48	0	0	A_42_P568897	NM_001005563	4797.09	224.722	6.367799e+002	6.374717e+001	664.5	28	6.896282e+000	0	0	0	0	0	0	608.983	1	1	49.8279	28.3939
DATA	474	6	49	0	0	A_64_P096356	NM_012640	4822.42	224.573	3.035960e+004	3.035961e+003	28385	28	6.263080e+000	0	0	0	0	0	0	28941.1	1	1	57.5363	29.2632
DATA	475	6	50	0	0	A_64_P006418	A_64_P006418	4847.82	224.632	5.640854e+003	5.640933e+002	5437	28.5	7.244181e+000	0	0	0	0	0	0	5359.32	1	1	49.5074	29.0667
DATA	476	6	51	0	0	A_64_P156389	A_64_P156389	4873.29	224.867	6.304698e+001	6.981629e+000	119	30	7.230602e+000	0	0	0	0	0	0	59.6919	1	1	49.1849	29.8333
DATA	477	6	52	0	0	A_42_P576446	NM_001107673	4898.38	224.776	6.596960e+003	6.597029e+002	5939	28.5	5.340645e+000	0	0	0	0	0	0	6223.29	1	1	48.8603	28.6786
DATA	478	6	53	0	0	A_64_P022804	A_64_P022804	4923.86	224.808	1.413124e+003	1.413447e+002	1352.5	28	4.216708e+000	0	0	0	0	0	0	1328.01	1	1	47.5395	27.6296
DATA	479	6	54	0	0	A_64_P162356	A_64_P162356	4949.31	225.014	1.279477e+004	1.279480e+003	11832	31	6.110101e+000	0	0	0	0	0	0	11977.2	1	1	47.2035	29.6
DATA	480	6	55	0	0	A_44_P266776	NM_199388	4974.72	224.882	7.077915e+002	7.084465e+001	701	28	6.153216e+000	0	0	0	0	0	0	659.859	1	1	48.8603	28.1724
DATA	481	6	56	0	0	A_64_P035066	NM_001008960	5000	225	8.662086e+000	3.178636e+000	67	30.5	8.009320e+000	0	0	0	0	0	0	8.04199	1	0	65	30.7222
DATA	482	6	57	0	0	A_64_P072728	NM_001100667	5025.06	224.687	8.550639e+003	8.550694e+002	7687	30.5	8.713548e+000	0	0	0	0	0	0	7904.37	1	1	45.835	31
DATA	483	6	58	0	0	A_64_P028446	NM_001106007	5050.79	224.806	3.159406e+003	3.159557e+002	2845	31	6.616546e+000	0	0	0	0	0	0	2907.59	1	1	47.5395	30.1026
DATA	484	6	59	0	0	A_44_P251212	NM_031715	5076.5	225	4.363457e+004	4.363458e+003	39427	33	9.201226e+000	0	0	0	0	0	0	39974.1	1	1	54.1152	32.3448
DATA	485	6	60	0	0	A_42_P818240	NM_001108334	5101.73	224.781	1.243457e+004	1.243461e+003	11050	31	7.344215e+000	0	0	0	0	0	0	11338.6	1	1	48.2044	30
DATA	486	6	61	0	0	A_64_P023122	NM_001080208	5127	225	1.608248e+001	3.517601e+000	77	32	9.873016e+000	0	0	0	0	0	0	14.5966	1	1	65	32.4583
DATA	487	6	62	0	0	A_44_P217821	NM_001107292	5152.34	224.973	2.354537e+002	2.375429e+001	267.5	32	8.775881e+000	0	0	0	0	0	0	212.674	1	1	49.1849	34.8667
DATA	488	6	63	0	0	A_64_P007372	NM_001105895	5177.5	225	1.360687e+001	3.439424e+000	74	29	5.138685e+000	0	0	0	0	0	0	12.2309	1	0	54.1152	27.9643
DATA	489	6	64	0	0	A_42_P792382	NM_017257	5203.17	225	8.324946e+003	8.325007e+002	7320	28	6.080400e+000	0	0	0	0	0	0	7445.55	1	1	46.8651	29.1667
DATA	490	6	65	0	0	A_43_P12232	NM_022512	5228.65	224.88	2.157896e+003	2.158132e+002	1941	30	7.651670e+000	0	0	0	0	0	0	1920.16	1	1	48.8603	29.7027
DATA	491	6	66	0	0	A_64_P158475	A_64_P158475	5254	224.797	7.923295e+003	7.923360e+002	6978	30	5.617786e+000	0	0	0	0	0	0	7014.46	1	1	46.8651	30.6786
DATA	492	6	67	0	0	A_64_P043361	NM_001197023	5279.5	225	1.018476e+002	1.068280e+001	153	31	5.654008e+000	0	0	0	0	0	0	89.7037	1	1	54.1152	29.9697
DATA	493	6	68	0	0	A_64_P080851	NM_001105753	5304.63	224.775	3.174641e+001	4.536472e+000	88	30	7.579399e+000	0	0	0	0	0	0	27.8164	1	1	47.5395	30.7037
DATA	494	6	69	0	0	A_44_P129330	NM_001107505	5329.87	225	1.156008e+003	1.156467e+002	1063	31	5.229515e+000	0	0	0	0	0	0	1007.7	1	1	48.5334	30.5652
DATA	495	6	70	0	0	A_64_P008827	NM_001014012	5355.44	224.973	2.829004e+003	2.829194e+002	2418	31	7.632637e+000	0	0	0	0	0	0	2453.03	1	1	48.5334	31.5143
DATA	496	6	71	0	0	A_64_P026222	NM_001101019	5380.91	225.386	6.675645e+001	7.443056e+000	116.5	30	7.621808e+000	0	0	0	0	0	0	57.5848	1	1	57.259	29.3333
DATA	497	6	72	0	0	A_64_P067749	NM_012659	5406.42	225.427	4.984245e+004	4.984246e+003	43509	30	6.138697e+000	0	0	0	0	0	0	42767.7	1	1	57.5363	29.2059
DATA	498	6	73	0	0	A_44_P362981	NM_145878	5431.58	225.427	4.526987e+004	4.526989e+003	38010.5	31.5	8.391296e+000	0	0	0	0	0	0	38641.7	1	1	57.5363	31.5769
DATA	499	6	74	0	0	A_64_P146654	NM_031698	5457.38	225	2.620087e+003	2.620300e+002	2238	31	8.326264e+000	0	0	0	0	0	0	2224.31	1	1	48.5334	32.08
DATA	500	6	75	0	0	A_42_P548800	NM_001007696	5482.64	224.871	6.949420e+003	6.949501e+002	5789	32	7.771605e+000	0	0	0	0	0	0	5868.77	1	1	46.8651	32.2581
DATA	501	6	76	0	0	A_44_P310581	BG673348	5507.95	224.712	4.389250e+003	4.389380e+002	3665	32	1.004608e+001	0	0	0	0	0	0	3687.34	1	1	45.835	33.069
DATA	502	6	77	0	0	A_64_P062269	XM_001067531	5533.73	225.238	2.013953e+002	2.042405e+001	230	34	8.338439e+000	0	0	0	0	0	0	168.325	1	1	50.7771	35.3793
DATA	503	6	78	66	1	DarkCorner	DarkCorner	5558.58	225.427	3.427497e+000	3.414157e+000	57	31	7.466354e+000	0	0	0	0	0	0	-1.32178	0	0	57.5363	30.1481
DATA	504	6	79	66	1	DarkCorner	DarkCorner	5584.46	225.602	3.445064e+000	3.431656e+000	55.5	30	6.750157e+000	0	0	0	0	0	0	-2.83726	0	0	51.7088	30.2692
DATA	505	6	80	66	1	DarkCorner	DarkCorner	5609.42	225.427	3.462173e+000	3.448698e+000	52	30	7.392564e+000	0	0	0	0	0	0	-5.87924	0	0	57.5363	30.9167
DATA	506	6	81	66	1	DarkCorner	DarkCorner	5634.82	225.247	3.479396e+000	3.465854e+000	53	31	8.094203e+000	0	0	0	0	0	0	-3.89239	0	0	49.5074	30.129
DATA	507	6	82	66	1	DarkCorner	DarkCorner	5660.58	225.284	3.496407e+000	3.482799e+000	57	27	6.488965e+000	0	0	0	0	0	0	-0.622064	0	0	51.0895	28.76
DATA	508	6	83	66	1	DarkCorner	DarkCorner	5685.96	225.61	3.512581e+000	3.503680e+000	61	29	4.535216e+000	0	0	0	0	0	0	1.48314	0	0	49.1849	28.4545
DATA	509	6	84	66	1	DarkCorner	DarkCorner	5711.15	225.175	3.529088e+000	3.528898e+000	62	29.5	6.632566e+000	0	0	0	0	0	0	2.49499	0	0	50.4627	28.5938
DATA	510	6	85	66	1	DarkCorner	DarkCorner	5736.5	225.5	6.680156e+000	3.593370e+000	64	25	6.476985e+000	0	0	0	0	0	0	5.37215	1	0	57.5363	25.9249
DATA	511	7	1	66	1	DarkCorner	DarkCorner	3590.73	231.133	7.944463e+000	3.269789e+000	66.5	26	6.435968e+000	0	0	0	0	0	0	7.11186	1	0	48.8603	26.0188
DATA	512	7	2	66	1	DarkCorner	DarkCorner	3616.09	231.065	3.166355e+000	3.165022e+000	61	32.5	8.962230e+000	0	0	0	0	0	0	2.37244	0	0	54.4085	32.4688
DATA	513	7	3	66	1	DarkCorner	DarkCorner	3641.5	231	3.149007e+000	3.140415e+000	63	28	6.261353e+000	0	0	0	0	0	0	1.37278	0	0	54.1152	28.2727
DATA	514	7	4	66	1	DarkCorner	DarkCorner	3667.05	231.041	3.132034e+000	3.119844e+000	60	28	8.344787e+000	0	0	0	0	0	0	-0.944437	0	0	46.8651	30.2759
DATA	515	7	5	66	1	DarkCorner	DarkCorner	3692.38	231.078	3.115772e+000	3.103646e+000	56	31	8.118175e+000	0	0	0	0	0	0	-2.39819	0	0	49.5074	31.1429
DATA	516	7	6	66	1	DarkCorner	DarkCorner	3717.75	231.213	3.099976e+000	3.087911e+000	57	28	6.276942e+000	0	0	0	0	0	0	-3.62083	0	0	50.4627	27.8
DATA	517	7	7	66	1	DarkCorner	DarkCorner	3743.14	231.5	3.084650e+000	3.072644e+000	58	30	9.040902e+000	0	0	0	0	0	0	-1.57608	0	0	48.5334	30.4375
DATA	518	7	8	66	1	DarkCorner	DarkCorner	3768.44	231.333	3.070218e+000	3.058269e+000	55	27	6.909080e+000	0	0	0	0	0	0	-3.57873	0	0	51.0895	27.1538
DATA	519	7	9	0	0	A_64_P051297	NM_001107416	3793.78	230.831	4.934815e+003	4.934909e+002	4666	30	8.548183e+000	0	0	0	0	0	0	4602.16	1	1	45.835	30
DATA	520	7	10	0	0	A_64_P162378	A_64_P162378	3819.42	231.427	6.700886e+004	6.700887e+003	62625.5	30.5	1.107168e+001	0	0	0	0	0	0	62777.1	1	1	57.5363	31.7143
DATA	521	7	11	0	0	A_64_P030634	ENSRNOT00000042606	3844.57	231.157	1.383834e+002	1.416367e+001	188	27	8.124038e+000	0	0	0	0	0	0	130.182	1	1	47.5395	29.4
DATA	522	7	12	0	0	A_64_P110009	NM_024392	3869.86	231.278	1.179120e+004	1.179124e+003	10833	28	6.798326e+000	0	0	0	0	0	0	11137.5	1	1	47.8731	28.3
DATA	523	7	13	0	0	A_42_P618145	NM_001080783	3895.36	231.355	4.316542e+003	4.316645e+002	4051	32	6.126532e+000	0	0	0	0	0	0	4093.15	1	1	48.8603	31.1429
DATA	525	7	15	0	0	A_64_P101770	NM_001000074	3946.33	231.5	6.870877e+000	3.051145e+000	64.5	32	8.038240e+000	0	0	0	0	0	0	6.5626	1	0	57.5363	32.4483
DATA	526	7	16	0	0	A_42_P735934	NM_001105729	3971.44	231.521	4.538376e+003	4.538472e+002	4564	28.5	6.917647e+000	0	0	0	1	0	0	4348.97	1	1	48.2044	28.5769
DATA	528	7	18	0	0	A_42_P718331	NM_133522	4022.56	231.324	1.454383e+003	1.454681e+002	1436	26	6.600395e+000	0	0	0	0	0	0	1402.14	1	1	48.2044	26.7391
DATA	529	7	19	0	0	A_64_P118054	NM_001037651	4047.58	231.427	2.154434e+001	3.642657e+000	80	33	7.355337e+000	0	0	0	0	0	0	20.8267	1	1	65	32.6207
DATA	530	7	20	0	0	A_64_P044613	A_64_P044613	4073.33	231.5	7.529161e+004	7.529162e+003	73131	31.5	7.298999e+000	0	0	0	0	0	0	72971.3	1	1	57.5363	31.6538
DATA	531	7	21	0	0	A_43_P13241	NM_134334	4098.5	231.5	2.673951e+004	2.673953e+003	25695	34	8.610339e+000	0	0	0	0	0	0	25975.3	1	1	57.5363	32.931
DATA	532	7	22	0	0	A_44_P524748	NM_001000712	4123.89	231.5	6.795299e+000	2.994830e+000	65	36	7.150175e+000	0	0	0	0	0	0	6.61515	1	0	56.9804	35.1875
DATA	533	7	23	0	0	A_64_P126797	ENSRNOT00000048363	4149.13	231.764	1.204159e+002	1.238846e+001	177	32	6.568910e+000	0	0	0	0	0	0	117.453	1	1	47.8731	31.4333
DATA	535	7	25	0	0	A_42_P730411	NM_001012181	4200.31	231.64	6.507976e+002	6.514441e+001	691	32	8.192421e+000	0	0	0	0	0	0	636.846	1	1	48.5334	30.5172
DATA	536	7	26	0	0	A_64_P049501	NM_001047970	4225.38	231.556	4.518029e+001	5.367522e+000	101	28	7.859522e+000	0	0	0	0	0	0	44.2685	1	1	48.2044	26.1852
DATA	537	7	27	0	0	A_42_P623688	NM_031031	4250.56	231.479	6.303714e+003	6.303780e+002	6017	29	7.720923e+000	0	0	0	0	0	0	6183.22	1	1	48.2044	27.6087
DATA	538	7	28	0	0	A_42_P601217	NM_053460	4276.16	231.836	1.255689e+002	1.288560e+001	187	28	6.242350e+000	0	0	0	0	0	0	123.287	1	1	47.5395	27.3214
DATA	540	7	30	0	0	A_42_P791872	NM_001135174	4327.07	231.726	9.171611e+003	9.171657e+002	8788	31	8.072333e+000	0	0	0	0	0	0	9015.5	1	1	48.2044	31.3448
DATA	542	7	32	0	0	A_44_P557172	NM_177936	4377.58	231.573	5.938812e+001	6.603600e+000	117.5	28	5.267194e+000	0	0	0	0	0	0	58.3974	1	1	57.5363	28.92
DATA	543	7	33	0	0	A_64_P118812	NM_001000512	4403.42	231.573	3.480040e+000	2.908821e+000	64	30.5	7.015798e+000	0	0	0	0	0	0	3.42156	1	0	65	29.75
DATA	544	7	34	0	0	A_64_P019425	NM_172035	4428.73	231.419	1.780887e+002	1.804166e+001	238	31	8.930710e+000	0	0	0	0	0	0	175.035	1	1	48.8603	32.5152
DATA	545	7	35	0	0	A_42_P726743	NM_001108985	4454	231.545	1.102771e+003	1.103150e+002	1108	31	5.276168e+000	0	0	0	0	0	0	1083.31	1	1	55.8519	30.2609
DATA	546	7	36	0	0	A_42_P558703	NM_001106810	4479.5	231.735	6.584324e+002	6.590674e+001	699	31	7.254809e+000	0	0	0	0	0	0	646.357	1	1	46.5243	31.0323
DATA	547	7	37	0	0	A_42_P619806	TC590118	4504.78	232.132	7.352456e+002	7.358153e+001	759.5	30.5	5.727630e+000	0	0	0	0	0	0	721.134	1	1	46.1809	30.5667
DATA	548	7	38	0	0	A_64_P072247	XM_001055615	4530.42	231.573	7.048238e+001	7.620940e+000	132	31.5	7.315466e+000	0	0	0	0	0	0	69.0461	1	1	57.5363	30.3824
DATA	549	7	39	0	0	A_64_P104164	A_64_P104164	4555.51	232.125	3.387334e+004	3.387335e+003	33357	30.5	6.814538e+000	0	0	0	0	0	0	33142.3	1	1	47.8731	29.9
DATA	550	7	40	0	0	A_42_P672103	NM_021770	4580.84	232.224	2.070246e+004	2.070249e+003	20146.5	30	7.107399e+000	0	0	0	0	0	0	20225.5	1	1	46.1809	29.5313
DATA	551	7	41	0	0	A_64_P090942	NM_001000406	4606.47	231.894	7.978563e+000	3.018812e+000	68	29.5	5.187186e+000	0	0	0	0	0	0	7.78105	1	0	45.4864	29.3
DATA	552	7	42	0	0	A_64_P149491	ENSRNOT00000025458	4631.91	231.913	7.158446e+001	7.729947e+000	127.5	33	8.149934e+000	0	0	0	0	0	0	69.6807	1	1	46.8651	31.75
DATA	553	7	43	0	0	A_42_P552441	NR_002704	4657.14	231.808	2.433921e+004	2.433922e+003	22991	34	1.068222e+001	0	0	0	0	0	0	23642.9	1	1	47.5395	34.5357
DATA	554	7	44	0	0	A_64_P060419	ENSRNOT00000055060	4682.06	232.045	3.999225e+000	2.956559e+000	63	38	1.019067e+001	0	0	0	0	0	0	3.87637	1	0	46.8651	37.7241
DATA	555	7	45	0	0	A_44_P161233	NM_019165	4708.04	231.94	8.540725e+002	8.545773e+001	897	33	7.189745e+000	0	0	0	0	0	0	825.769	1	1	46.8651	33.1143
DATA	556	7	46	66	-1	(-)3xSLv1	NegativeControl	4733.09	231.814	2.955822e+000	2.944318e+000	54	31	7.751718e+000	0	0	0	0	0	0	-4.73795	0	0	46.8651	30.8235
DATA	557	7	47	0	0	A_43_P12519	NM_031114	4758.5	232	1.035989e+004	1.035993e+003	9756	31	7.244210e+000	0	0	0	0	0	0	9963.28	1	1	48.5334	30.25
DATA	558	7	48	0	0	A_44_P317600	NM_012612	4784	232	3.982871e+002	3.993863e+001	431	31	7.052266e+000	0	0	0	0	0	0	381.91	1	1	46.8651	30.9714
DATA	559	7	49	0	0	A_64_P034166	A_64_P034166	4809.5	232	9.100316e+000	3.106672e+000	68.5	28	6.802406e+000	0	0	0	0	0	0	8.69897	1	0	54.1152	28.9091
DATA	560	7	50	0	0	A_64_P024585	NM_001109337	4835	232	8.046288e+000	3.086858e+000	68	28	5.857849e+000	0	0	0	0	0	0	7.66627	1	0	65	29.4242
DATA	561	7	51	0	0	A_42_P654682	NM_012724	4860.39	232.054	5.154779e+000	3.034425e+000	64	28	8.155055e+000	0	0	0	0	0	0	4.89461	1	0	49.1849	29.1724
DATA	562	7	52	0	0	A_42_P524610	NM_001108992	4885.63	232	2.941556e+003	2.941709e+002	2667	27	4.388270e+000	0	0	0	0	0	0	2783.19	1	1	48.5334	27.4348
DATA	563	7	53	0	0	A_64_P046677	NM_020093	4911.09	232.065	6.065918e+000	3.072587e+000	65	26	4.900142e+000	0	0	0	0	0	0	5.71809	1	0	54.4085	26.6296
DATA	564	7	54	0	0	A_64_P042742	XM_001061779	4936.59	232.092	7.398805e+002	7.404982e+001	757.5	28.5	5.836847e+000	0	0	0	0	0	0	694.767	1	1	49.1849	27.9286
DATA	565	7	55	0	0	A_64_P058430	ENSRNOT00000062073	4961.91	232.065	1.885397e+001	3.573635e+000	78	32	5.774620e+000	0	0	0	0	0	0	17.6341	1	1	54.4085	30.2903
DATA	566	7	56	0	0	A_42_P479251	NM_001108686	4987.28	232.118	8.505615e+003	8.505670e+002	7776.5	29	5.951190e+000	0	0	0	0	0	0	7922.77	1	1	48.8603	28.6
DATA	567	7	57	0	0	A_42_P777329	NM_001106943	5012.78	232.084	5.095647e+002	5.104834e+001	532.5	32	7.498817e+000	0	0	0	0	0	0	472.63	1	1	49.8279	31.9677
DATA	568	7	58	0	0	A_64_P103414	NM_001106472	5038.09	232.065	6.070710e+000	3.133958e+000	65	30.5	7.794662e+000	0	0	0	0	0	0	5.60631	1	0	65	31
DATA	569	7	59	0	0	A_64_P082164	A_64_P082164	5063.89	231.985	9.008621e+001	9.523380e+000	140	31.5	7.712060e+000	0	0	0	0	0	0	82.8173	1	1	46.1809	31.8
DATA	570	7	60	0	0	A_42_P702729	NM_001107557	5088.92	231.778	2.108344e+003	2.108572e+002	1982	31	6.771790e+000	0	0	0	0	0	0	1929.45	1	1	45.4864	30
DATA	571	7	61	0	0	A_64_P130922	A_64_P130922	5114.37	232.288	5.584999e+002	5.593690e+001	568.5	31	7.536237e+000	0	0	0	0	0	0	508.775	1	1	48.5334	29.5556
DATA	572	7	62	0	0	A_42_P509843	NM_001100480	5139.08	232.391	6.819962e+002	6.827147e+001	662.5	32	1.044671e+001	0	0	0	0	0	0	618.422	1	1	44.7812	34.5769
DATA	573	7	63	0	0	A_64_P110759	A_64_P110759	5165	232.455	5.148050e+001	6.033604e+000	109	31	8.447410e+000	0	0	0	0	0	0	46.4524	1	1	55.8519	31.8889
DATA	574	7	64	0	0	A_64_P006235	A_64_P006235	5190.59	232.308	6.878970e+002	6.886235e+001	673	29	5.412379e+000	0	0	0	0	0	0	617.628	1	1	50.4627	28.4231
DATA	575	7	65	0	0	A_44_P506064	NM_001191778	5215.58	232.427	4.207015e+001	5.272388e+000	97	28.5	6.553748e+000	0	0	0	0	0	0	37.5888	1	1	57.5363	30.125
DATA	576	7	66	0	0	A_64_P075425	A_64_P075425	5241.28	231.971	1.039511e+004	1.039516e+003	9212	29.5	7.009819e+000	0	0	0	0	0	0	9239.7	1	1	46.1809	29.2143
DATA	577	7	67	0	0	A_42_P544898	NM_001108279	5266.58	232.427	4.274827e+001	5.346117e+000	98	28	4.388401e+000	0	0	0	0	0	0	37.8078	1	1	57.5363	28.5161
DATA	578	7	68	0	0	A_44_P837192	ENSRNOT00000038251	5292	232.455	2.805317e+001	4.275880e+000	84	31	7.193677e+000	0	0	0	0	0	0	24.6838	1	1	55.8519	31.8438
DATA	580	7	70	0	0	A_44_P325657	NM_001014007	5342.67	232.5	1.352752e+002	1.391492e+001	176.5	31.5	7.977067e+000	0	0	0	0	0	0	117.802	1	1	57.5363	30.8214
DATA	581	7	71	0	0	A_64_P004598	ENSRNOT00000024034	5368.5	232.5	2.445144e+002	2.467018e+001	268.5	30	7.757826e+000	0	0	0	0	0	0	211.802	1	1	49.1849	30.0357
DATA	582	7	72	0	0	A_42_P607183	XM_001081723	5393.48	232.437	1.515807e+003	1.516165e+002	1331	30	6.911577e+000	0	0	0	0	0	0	1306.24	1	1	48.2044	29.3548
DATA	584	7	74	0	0	A_42_P589190	NM_023104	5444.34	232.405	1.032287e+003	1.032824e+002	898.5	32	1.304313e+001	0	0	0	0	0	0	880.279	1	1	48.5334	36.8621
DATA	585	7	75	0	0	A_42_P757323	TC587630	5469.61	232.271	3.918065e+003	3.918208e+002	3284.5	31	8.685548e+000	0	0	0	1	0	0	3323.69	1	1	47.5395	33.1481
DATA	586	7	76	0	0	A_42_P688320	NM_001108569	5495.71	232.3	2.604436e+002	2.626086e+001	281	32	7.154522e+000	0	0	0	0	0	0	219.759	1	1	47.2035	32.5172
DATA	587	7	77	0	0	A_44_P224705	NM_031002	5520.62	232.636	1.114135e+002	1.164331e+001	153	31	8.119478e+000	0	0	0	0	0	0	93.5429	1	1	49.8279	32
DATA	588	7	78	0	0	A_42_P481849	NM_001100563	5545.89	232.562	2.066185e+003	2.066465e+002	1706	31	7.714082e+000	0	0	0	1	0	0	1725.94	1	1	48.2044	31.9063
DATA	589	7	79	66	1	DarkCorner	DarkCorner	5571.42	232.573	3.429809e+000	3.416460e+000	54	31	6.576980e+000	0	0	0	0	0	0	-4.31213	0	0	57.5363	30.44
DATA	590	7	80	66	1	DarkCorner	DarkCorner	5596.62	232.812	3.446615e+000	3.433200e+000	58	30	6.646233e+000	0	0	0	0	0	0	-0.291956	0	0	46.8651	30.6207
DATA	591	7	81	66	1	DarkCorner	DarkCorner	5622.87	232.415	3.464526e+000	3.451042e+000	53	30	7.678246e+000	0	0	0	0	0	0	-4.61276	0	0	50.7771	30.6923
DATA	592	7	82	66	1	DarkCorner	DarkCorner	5648.28	232.82	3.480889e+000	3.467341e+000	57	29	7.907869e+000	0	0	0	0	0	0	-1.99483	0	0	44.4243	29.6429
DATA	593	7	83	66	1	DarkCorner	DarkCorner	5673.03	232.177	3.497588e+000	3.483975e+000	55	29	4.856341e+000	0	0	0	0	0	0	-3.43841	0	0	49.5074	28.2593
DATA	594	7	84	66	1	DarkCorner	DarkCorner	5698.56	232.278	3.513753e+000	3.500077e+000	56	30.5	6.292802e+000	0	0	0	0	0	0	-2.86581	0	0	48.5334	29.875
DATA	595	7	85	66	1	DarkCorner	DarkCorner	5724.4	232.747	4.769964e+000	3.547833e+000	63	29	6.515502e+000	0	0	0	0	0	0	3.85247	1	0	49.1849	28.2941
DATA	596	8	1	66	1	DarkCorner	DarkCorner	3603.22	238.487	3.759294e+000	3.179973e+000	63	27	8.518932e+000	0	0	0	0	0	0	3.38037	1	0	49.8279	29.1795
DATA	597	8	2	66	1	DarkCorner	DarkCorner	3628.45	238.579	3.152574e+000	3.140304e+000	59	33	9.378539e+000	0	0	0	0	0	0	-1.24267	0	0	49.5074	31.9032
DATA	598	8	3	66	1	DarkCorner	DarkCorner	3654.4	238.403	3.135366e+000	3.123163e+000	61	26	5.502574e+000	0	0	0	0	0	0	-0.15055	0	0	47.8731	27.7241
DATA	599	8	4	66	1	DarkCorner	DarkCorner	3679.52	238.557	3.119034e+000	3.106895e+000	57.5	27.5	6.200358e+000	0	0	0	0	0	0	-0.282219	0	0	50.4627	28
DATA	600	8	5	66	1	DarkCorner	DarkCorner	3704.89	238.5	3.103222e+000	3.091144e+000	58	29	7.374700e+000	0	0	0	0	0	0	-0.648822	0	0	56.9804	30.4
DATA	601	8	6	66	1	DarkCorner	DarkCorner	3730.69	238.5	3.087680e+000	3.075662e+000	56	27.5	8.516238e+000	0	0	0	0	0	0	-3.86711	0	0	49.1849	28.4737
DATA	602	8	7	66	1	DarkCorner	DarkCorner	3755.58	238.573	3.073189e+000	3.061228e+000	55	26	5.987973e+000	0	0	0	0	0	0	-5.02856	0	0	57.5363	26.6786
DATA	603	8	8	0	0	A_44_P487081	NM_001033951	3781.11	238.5	6.212826e+002	6.220294e+001	631	30	9.834640e+000	0	0	0	0	0	0	578.937	1	1	56.9804	30.3529
DATA	604	8	9	0	0	A_64_P054403	NM_001170340	3806.5	238.648	2.499247e+002	2.517589e+001	296	30	9.774834e+000	0	0	0	0	0	0	233.937	1	1	57.5363	31.5313
DATA	605	8	10	0	0	A_44_P665685	NM_001109325	3831.81	238.57	1.431117e+001	3.342444e+000	72	30.5	7.342057e+000	0	0	0	0	0	0	13.4528	1	0	58.0869	31.0833
DATA	606	8	11	0	0	A_42_P531684	NM_001014215	3857.29	238.301	3.979873e+002	3.991226e+001	425.5	28	4.850474e+000	0	0	0	0	0	0	375.644	1	1	48.2044	28.7931
DATA	607	8	12	0	0	A_42_P722904	ENSRNOT00000006525	3882.5	238.5	2.975321e+003	2.975471e+002	2817.5	28	5.774601e+000	0	0	0	1	0	0	2819.37	1	1	49.1849	29.2917
DATA	608	8	13	0	0	A_42_P514057	NM_031839	3908.09	238.614	1.894486e+001	3.535506e+000	76	32	7.762980e+000	0	0	0	0	0	0	18.0202	1	1	57.259	30.0286
DATA	609	8	14	0	0	A_64_P087459	A_64_P087459	3933.5	238.648	9.439388e+004	9.439388e+003	90252	31.5	8.998208e+000	0	0	0	0	0	0	90108.5	1	1	57.5363	32
DATA	610	8	15	0	0	A_42_P581060	NM_001108722	3958.63	238.744	1.218105e+004	1.218108e+003	11369	33.5	9.697201e+000	0	0	0	0	0	0	11667.2	1	1	50.1463	31.9643
DATA	611	8	16	0	0	A_42_P658220	NM_001109598	3984.01	238.9	2.582969e+003	2.583138e+002	2526	28.5	6.103856e+000	0	0	0	0	0	0	2481.98	1	1	46.8651	29.0313
DATA	612	8	17	0	0	A_42_P758454	NM_001108101	4009.57	238.843	2.337486e+002	2.355978e+001	278.5	26	6.200678e+000	0	0	0	0	0	0	225.286	1	1	47.5395	27.1786
DATA	613	8	18	0	0	A_64_P140956	NM_001013141	4034.79	238.806	2.532781e+002	2.549762e+001	299	27	5.361903e+000	0	0	0	0	0	0	244.788	1	1	47.5395	28.4
DATA	614	8	19	0	0	A_42_P508984	NM_001007729	4060.37	238.794	4.716869e+002	4.725962e+001	511	32	6.777413e+000	0	0	0	0	0	0	457.075	1	1	46.8651	33
DATA	615	8	20	0	0	A_42_P619008	NM_001013079	4085.66	238.676	5.646610e+003	5.646686e+002	5392	29	7.455870e+000	0	0	0	0	0	0	5484.76	1	1	47.5395	30.56
DATA	616	8	21	0	0	A_64_P058351	NM_017101	4111.5	239	8.710632e+004	8.710633e+003	84752	35	7.754865e+000	0	0	0	0	0	0	84804.1	1	1	54.1152	34
DATA	617	8	22	0	0	A_64_P083800	XM_001058776	4136.63	239	1.261350e+002	1.294498e+001	183.5	36	6.459359e+000	0	0	0	0	0	0	123.046	1	1	48.5334	35.2174
DATA	618	8	23	0	0	A_64_P028088	NM_001106073	4162.06	239.024	5.758777e+002	5.766101e+001	612	32	4.220133e+000	0	0	0	0	0	0	562.793	1	1	50.7771	31.4286
DATA	619	8	24	0	0	A_44_P105441	ENSRNOT00000042202	4187.29	239.106	1.374266e+004	1.374269e+003	13441.5	29	5.614534e+000	0	0	0	0	0	0	13452	1	1	45.835	28.8333
DATA	620	8	25	0	0	A_42_P675802	NM_145777	4212.91	238.918	3.766821e+003	3.766932e+002	3701	28	7.804913e+000	0	0	0	0	0	0	3692.28	1	1	51.0895	27.4
DATA	621	8	26	0	0	A_64_P018525	ENSRNOT00000027134	4238.44	238.986	3.318271e+002	3.330860e+001	386.5	30	7.743670e+000	0	0	0	0	0	0	325.656	1	1	48.5334	27.3478
DATA	622	8	27	0	0	A_42_P749382	NM_001106731	4263.5	238.944	1.119169e+004	1.119173e+003	10762.5	28	5.955755e+000	0	0	0	0	0	0	10994.3	1	1	48.5334	27.9167
DATA	623	8	28	0	0	A_44_P316364	NM_001077675	4289	239	1.646007e+001	3.324199e+000	76	25.5	6.032098e+000	0	0	0	0	0	0	16.1826	1	1	65	24.6
DATA	624	8	29	0	0	A_64_P143596	ENSRNOT00000060139	4314.5	239	1.466834e+002	1.494963e+001	198	28	8.039085e+000	0	0	0	0	0	0	144.296	1	1	54.1152	28.2424
DATA	625	8	30	0	0	A_42_P468723	NM_001191689	4339.52	238.945	5.825482e+002	5.832623e+001	619.5	31	7.724885e+000	0	0	0	0	0	0	573.277	1	1	48.5334	31.9231
DATA	626	8	31	0	0	A_42_P533792	NM_001106575	4365.08	239.099	1.113241e+004	1.113245e+003	10556	28	5.224044e+000	0	0	0	0	0	0	10957.4	1	1	46.8651	28.1724
DATA	627	8	32	0	0	A_43_P16773	XM_217313	4390.37	239.043	5.701587e+002	5.708880e+001	618	31	5.885417e+000	0	0	0	0	0	0	561.18	1	1	46.8651	30.027
DATA	628	8	33	0	0	A_42_P765830	NM_001106426	4416.24	238.813	2.022043e+004	2.022045e+003	19463.5	31	7.470918e+000	0	0	0	0	0	0	19896.8	1	1	49.5074	30.9412
DATA	629	8	34	0	0	A_43_P15073	ENSRNOT00000030771	4441.22	238.868	8.585331e+001	9.057672e+000	146	29	8.114564e+000	0	0	0	0	0	0	84.444	1	1	46.1809	30.3333
DATA	630	8	35	0	0	A_42_P538527	NM_001108885	4466.57	238.71	1.144812e+003	1.145176e+002	1165	30	6.868733e+000	0	0	0	0	0	0	1125.29	1	1	46.8651	30.7778
DATA	631	8	36	0	0	A_64_P037130	A_64_P037130	4492.37	239.404	2.902107e+000	2.902112e+000	62	32	6.626965e+000	0	0	0	0	0	0	2.51306	0	0	57.8122	31.3333
DATA	632	8	37	0	0	A_44_P536115	NM_023957	4517.38	239.295	2.287919e+003	2.288102e+002	2270	30.5	6.127674e+000	0	0	0	0	0	0	2244.93	1	1	50.4627	29.5
DATA	633	8	38	0	0	A_43_P11800	NM_017059	4542.91	239.386	2.081660e+002	2.101725e+001	259	31	7.427354e+000	0	0	0	0	0	0	204.008	1	1	57.259	29.9677
DATA	634	8	39	0	0	A_64_P004922	NM_001191924	4568.12	239.459	1.747646e+003	1.747887e+002	1719.5	32	7.189340e+000	0	0	0	0	0	0	1710.36	1	1	48.8603	33.0741
DATA	635	8	40	0	0	A_64_P145058	NM_001107951	4593.64	239.316	1.192571e+003	1.192926e+002	1194.5	30	6.056242e+000	0	0	0	0	0	0	1165.23	1	1	49.1849	29.2963
DATA	636	8	41	0	0	A_64_P075372	A_64_P075372	4619.11	239.5	3.277587e+001	4.383765e+000	91	31	8.430869e+000	0	0	0	0	0	0	31.9679	1	1	65	31.7273
DATA	637	8	42	0	0	A_64_P118792	NM_001107034	4644.42	239.427	3.302202e+001	4.406006e+000	92.5	32	9.879770e+000	0	0	0	0	0	0	32.1445	1	1	65	31.7879
DATA	638	8	43	0	0	A_42_P469685	NM_001100532	4669.72	238.971	4.510186e+003	4.510281e+002	4385	37	9.409859e+000	0	0	0	0	0	0	4380.66	1	1	46.1809	36.5455
DATA	639	8	44	0	0	A_42_P759822	NM_001109673	4695.42	239.427	5.404087e+002	5.412025e+001	584	33	9.342524e+000	0	0	0	1	0	0	523.685	1	1	57.5363	34.6
DATA	640	8	45	0	0	A_64_P014687	NM_012650	4720.81	239.419	1.103630e+004	1.103634e+003	11018	33	7.076021e+000	0	0	0	0	0	0	10668	1	1	52.3208	33.1515
DATA	641	8	46	0	0	A_43_P18505	NM_001012010	4746.11	239.5	6.655791e+001	7.278325e+000	126	31	7.427809e+000	0	0	0	0	0	0	64.1659	1	1	56.9804	31.2121
DATA	642	8	47	0	0	A_43_P12580	NM_031548	4771.5	239.5	1.652536e+002	1.678724e+001	213.5	32.5	7.277425e+000	0	0	0	0	0	0	158.862	1	1	57.5363	30.9333
DATA	643	8	48	0	0	A_64_P052980	NM_001014786	4796.67	239.5	1.827005e+001	3.480531e+000	79	30.5	9.752946e+000	0	0	0	0	0	0	17.5111	1	1	65	31.9063
DATA	644	8	49	0	0	A_64_P397764	ENSRNOT00000028709	4822.33	239.5	5.152242e+002	5.160807e+001	552	26.5	6.591182e+000	0	0	0	0	0	0	492.243	1	1	57.5363	27.9333
DATA	645	8	50	0	0	A_64_P048408	NM_001008858	4847.63	239.37	8.576081e+001	9.079688e+000	140	29	7.474688e+000	0	0	0	0	0	0	81.663	1	1	48.2044	30
DATA	647	8	52	0	0	A_64_P059500	ENSRNOT00000043917	4898.5	239.5	6.626345e+000	3.075319e+000	65	28	5.243479e+000	0	0	0	0	0	0	6.26517	1	0	57.5363	28.3043
DATA	648	8	53	0	0	A_64_P220198	AW917371	4923.78	239.403	1.451311e+001	3.345574e+000	70	28	7.220044e+000	0	0	0	0	0	0	13.6706	1	0	49.8279	29.75
DATA	649	8	54	0	0	A_64_P109764	NM_001007756	4949.19	239.469	3.466494e+002	3.479678e+001	389	31.5	5.649370e+000	0	0	0	0	0	0	325.258	1	1	51.0895	30.6538
DATA	650	8	55	0	0	A_64_P142685	NM_001130498	4974.5	239.5	1.659114e+001	3.461772e+000	76	30	6.493095e+000	0	0	0	0	0	0	15.505	1	1	65	30.0313
DATA	651	8	56	0	0	A_44_P395709	NM_134366	5000	239.545	8.009978e+002	8.015786e+001	801.5	32	8.408599e+000	0	0	0	0	0	0	745.454	1	1	55.8519	33.7273
DATA	652	8	57	0	0	A_64_P165071	NM_001110165	5025.58	239.409	1.437270e+004	1.437273e+003	13051	34	8.249277e+000	0	0	0	0	0	0	13318.3	1	1	52.9257	33.4667
DATA	653	8	58	0	0	A_64_P009147	ENSRNOT00000042587	5050.81	239.467	9.664555e+001	1.014272e+001	151	30	6.406650e+000	0	0	0	0	0	0	89.1675	1	1	49.5074	29.6129
DATA	654	8	59	0	0	A_42_P647072	NM_178102	5076.12	239.384	1.461509e+003	1.461835e+002	1367	32	8.470327e+000	0	0	0	0	0	0	1342.38	1	1	48.5334	31.8519
DATA	655	8	60	0	0	A_64_P125585	XM_001063000	5101.58	239.573	2.651347e+001	4.083365e+000	85	31	8.691798e+000	0	0	0	0	0	0	24.2414	1	1	57.5363	31.2121
DATA	656	8	61	0	0	A_42_P610317	NM_001108225	5126.74	239.5	7.888156e+003	7.888218e+002	6946.5	29.5	9.973516e+000	0	0	0	1	0	0	7178.73	1	1	50.4627	30.4167
DATA	657	8	62	0	0	A_42_P755831	NM_152935	5152.31	239.662	2.366351e+004	2.366353e+003	20986	32	1.038656e+001	0	0	0	0	0	0	21432.8	1	1	48.5334	33.5455
DATA	659	8	64	0	0	A_44_P386375	NM_053842	5203.06	239.768	3.516503e+002	3.530723e+001	383.5	30	8.068195e+000	0	0	0	0	0	0	315.415	1	1	46.5243	31.5313
DATA	660	8	65	0	0	A_43_P15565	NM_023953	5228.94	239.291	1.948900e+001	3.731400e+000	78	28	8.750798e+000	0	0	0	0	0	0	17.3906	1	1	49.8279	29.8
DATA	661	8	66	0	0	A_42_P456701	NM_001009697	5254.23	239.301	1.389438e+003	1.389806e+002	1281.5	30	5.901073e+000	0	0	0	0	0	0	1233.63	1	1	48.5334	29.4138
DATA	662	8	67	0	0	A_43_P20388	ENSRNOT00000061333	5279.44	239.466	1.015992e+003	1.016500e+002	929	31	4.450468e+000	0	0	0	0	0	0	897.544	1	1	49.1849	30.16
DATA	663	8	68	0	0	A_44_P572504	TC585660	5305.06	239.382	4.515373e+002	4.526917e+001	446	30	8.030760e+000	0	0	0	0	0	0	396.829	1	1	46.1809	30.3
DATA	664	8	69	0	0	A_64_P059964	NM_001013858	5329.93	239.507	4.770909e+003	4.771020e+002	4067	29	7.900737e+000	0	0	0	0	0	0	4171.82	1	1	48.5334	29.037
DATA	665	8	70	0	0	A_44_P1056293	ENSRNOT00000022862	5355.5	240	1.789044e+003	1.789342e+002	1581	29	7.708221e+000	0	0	0	0	0	0	1556.41	1	1	48.5334	29.6667
DATA	666	8	71	0	0	A_64_P133276	NM_001107464	5380.76	240	8.695937e+002	8.702124e+001	800	28.5	6.206649e+000	0	0	0	0	0	0	752.617	1	1	46.8651	27.6786
DATA	667	8	72	0	0	A_42_P667782	NM_001009673	5406	239.797	1.631952e+003	1.632285e+002	1417	29.5	7.019558e+000	0	0	0	1	0	0	1405.07	1	1	46.8651	29.125
DATA	668	8	73	0	0	A_64_P023624	A_64_P023624	5431.63	239.75	4.236050e+002	4.249003e+001	424.5	29	6.357935e+000	0	0	0	0	0	0	362.798	1	1	46.5243	29.44
DATA	669	8	74	0	0	A_64_P110130	NM_001106172	5457.28	239.902	6.547751e+002	6.556226e+001	629	29.5	6.735735e+000	0	0	0	0	0	0	557.872	1	1	49.8279	29.3182
DATA	670	8	75	0	0	A_64_P087728	XM_001078778	5482.5	239.697	1.702185e+002	1.734835e+001	204	32.5	9.308122e+000	0	0	0	0	0	0	144.277	1	1	46.5243	33.4375
DATA	671	8	76	0	0	A_44_P475356	NM_001177823	5507.78	239.75	3.692972e+002	3.708290e+001	377	31	6.488148e+000	0	0	0	0	0	0	311.423	1	1	45.1352	31.1034
DATA	672	8	77	0	0	A_42_P560984	NM_001109179	5533.14	239.808	1.960449e+004	1.960452e+003	15783	32	7.170095e+000	0	0	0	0	0	0	16448.5	1	1	47.5395	32.7778
DATA	673	8	78	0	0	A_42_P566906	NM_001006966	5558.53	239.88	4.499997e+003	4.500126e+002	3684	32	6.800788e+000	0	0	0	0	0	0	3756.63	1	1	48.8603	31.4074
DATA	674	8	79	66	1	DarkCorner	DarkCorner	5584	240	3.431544e+000	3.418188e+000	54	32	7.070940e+000	0	0	0	0	0	0	-6.34222	0	0	65	32.2083
DATA	675	8	80	66	1	DarkCorner	DarkCorner	5609.78	239.882	3.448799e+000	3.435376e+000	55.5	31	7.149102e+000	0	0	0	0	0	0	-4.53941	0	0	48.8603	31.1522
DATA	676	8	81	66	1	DarkCorner	DarkCorner	5635.23	239.946	3.465462e+000	3.451974e+000	57	30	8.069315e+000	0	0	0	0	0	0	-1.99393	0	0	48.2044	29.9231
DATA	677	8	82	66	1	DarkCorner	DarkCorner	5660.41	240.013	3.481691e+000	3.468140e+000	53.5	28.5	4.862824e+000	0	0	0	0	0	0	-4.6904	0	0	49.5074	28.3333
DATA	678	8	83	66	1	DarkCorner	DarkCorner	5684.93	240.071	3.497228e+000	3.483617e+000	57	29	5.415079e+000	0	0	0	0	0	0	-2.23782	0	0	42.9674	29.1
DATA	679	8	84	66	1	DarkCorner	DarkCorner	5711.35	239.845	3.513915e+000	3.500238e+000	56	31	6.493639e+000	0	0	0	0	0	0	-1.90819	0	0	47.5395	30.8718
DATA	680	8	85	66	1	DarkCorner	DarkCorner	5736.74	240.221	3.528941e+000	3.520151e+000	59.5	25	6.878807e+000	0	0	0	0	0	0	1.5066	0	0	48.8603	26.1528
DATA	681	9	1	66	1	DarkCorner	DarkCorner	3591.02	245.654	5.444474e+000	3.207593e+000	63	26	6.896527e+000	0	0	0	0	0	0	4.89047	1	0	51.0895	26.2259
DATA	682	9	2	66	1	DarkCorner	DarkCorner	3616.15	245.28	3.156268e+000	3.143983e+000	57	31	7.687377e+000	0	0	0	0	0	0	-1.76156	0	0	50.7771	31.4688
DATA	683	9	3	66	1	DarkCorner	DarkCorner	3641.41	246.029	3.138779e+000	3.126563e+000	57.5	30	8.854256e+000	0	0	0	0	0	0	-3.6273	0	0	46.5243	30.7419
DATA	684	9	4	66	1	DarkCorner	DarkCorner	3666.86	245.229	3.122743e+000	3.110589e+000	57.5	27.5	5.581993e+000	0	0	0	0	0	0	-2.13592	0	0	46.5243	28.4118
DATA	685	9	5	66	1	DarkCorner	DarkCorner	3692.51	245.798	3.106218e+000	3.094128e+000	55	28	5.203148e+000	0	0	0	0	0	0	-4.4473	0	0	50.1463	27.9643
DATA	686	9	6	66	1	DarkCorner	DarkCorner	3717.5	246	3.090898e+000	3.078868e+000	53	30.5	6.919708e+000	0	0	0	0	0	0	-3.86168	0	0	54.1152	30.7647
DATA	687	9	7	66	1	DarkCorner	DarkCorner	3742.84	246.147	3.075953e+000	3.063982e+000	52	28.5	6.662289e+000	0	0	0	0	0	0	-5.69987	0	0	46.1809	28.4688
DATA	688	9	8	0	0	A_44_P195306	NM_019377	3768.5	246	3.371552e+004	3.371554e+003	30637	30	1.023750e+001	0	0	0	0	0	0	31391.1	1	1	54.1152	31.1613
DATA	689	9	9	0	0	A_44_P653240	NM_001202552	3793.63	246	8.823624e+002	8.828846e+001	853	30	7.422488e+000	0	0	0	0	0	0	825.2	1	1	48.5334	28.48
DATA	690	9	10	0	0	A_64_P012778	ENSRNOT00000038310	3819.49	245.592	1.415516e+001	3.337926e+000	72.5	36	1.020363e+001	0	0	0	0	0	0	13.2958	1	0	47.2035	35.875
DATA	691	9	11	0	0	A_43_P11430	NM_001130503	3844.36	245.87	3.683677e+002	3.695957e+001	404	30	5.304677e+000	0	0	0	0	0	0	347.436	1	1	46.8651	29.2963
DATA	692	9	12	0	0	A_44_P225353	NM_001009678	3869.91	245.896	6.774511e+002	6.781143e+001	682	32	8.210520e+000	0	0	0	0	0	0	641.531	1	1	46.8651	32.9667
DATA	693	9	13	0	0	A_64_P055231	NM_001106620	3895.25	246	1.225397e+003	1.225761e+002	1242	28	5.899640e+000	0	0	0	0	0	0	1164.87	1	1	49.1849	28.5667
DATA	694	9	14	0	0	A_42_P540950	NM_001009541	3920.54	246.099	1.363974e+003	1.364299e+002	1325	30.5	7.087304e+000	0	0	0	1	0	0	1301.32	1	1	47.8731	30.3333
DATA	695	9	15	0	0	A_64_P135888	ENSRNOT00000029916	3946.5	246	6.213439e+000	3.030062e+000	64	34	1.127740e+001	0	0	0	0	0	0	5.94888	1	0	65	34.5862
DATA	696	9	16	0	0	A_64_P086448	NM_001008819	3971.5	246.056	1.312657e+002	1.345532e+001	184	27	6.888439e+000	0	0	0	0	0	0	126.082	1	1	48.5334	28.2174
DATA	697	9	17	0	0	A_42_P701779	NM_001108048	3996.66	245.932	2.068381e+003	2.068591e+002	1905	27	5.227108e+000	0	0	0	0	0	0	1992.72	1	1	48.8603	28.5862
DATA	698	9	18	0	0	A_44_P409965	ENSRNOT00000036078	4022.31	246.043	2.688263e+001	3.982722e+000	87.5	27	4.686353e+000	0	0	0	0	0	0	25.9752	1	1	46.5243	27.4762
DATA	699	9	19	0	0	A_44_P474037	NM_052807	4047.62	245.913	1.384048e+002	1.414739e+001	193.5	31.5	5.038467e+000	0	0	0	0	0	0	134.089	1	1	46.5243	30.8846
DATA	700	9	20	0	0	A_64_P156985	NM_001000385	4073.39	246.069	2.934743e+000	2.934849e+000	63	29	7.507637e+000	0	0	0	0	0	0	2.52414	0	0	53.8203	31.2692
DATA	701	9	21	0	0	A_42_P635228	NM_001107651	4098.5	246	6.203939e+001	6.855375e+000	118	32	8.641452e+000	0	0	0	0	0	0	60.3945	1	1	54.1152	32.1471
DATA	702	9	22	0	0	A_64_P240508	ENSRNOT00000018000	4123.91	246.065	4.464783e+002	4.474260e+001	497	35.5	8.872033e+000	0	0	0	0	0	0	435.557	1	1	65	34.75
DATA	703	9	23	0	0	A_64_P026509	NM_020656	4149.42	246.427	1.059784e+002	1.098875e+001	166	33	7.835717e+000	0	0	0	0	0	0	103.588	1	1	65	34.0385
DATA	704	9	24	0	0	A_42_P570241	NM_177928	4174.52	246.174	2.354972e+002	2.372762e+001	295	31	6.518219e+000	0	0	0	0	0	0	230.564	1	1	47.2035	30.8889
DATA	706	9	26	0	0	A_64_P032893	TC597420	4225.5	246.352	3.199505e+004	3.199506e+003	30772.5	30	7.290864e+000	0	0	0	0	0	0	31413.2	1	1	57.5363	26.8148
DATA	707	9	27	0	0	A_64_P043605	NM_001024799	4250.64	245.943	5.794499e+003	5.794571e+002	5550	30	6.063003e+000	0	0	0	0	0	0	5694.93	1	1	46.8651	30.52
DATA	708	9	28	0	0	A_64_P095890	NM_019337	4276.38	246.068	1.663212e+004	1.663215e+003	16087.5	28	5.121913e+000	0	0	0	0	0	0	16361.3	1	1	49.1849	25.6552
DATA	709	9	29	0	0	A_42_P513145	NM_001107288	4301.35	246.284	4.947552e+002	4.955953e+001	533	27.5	8.458146e+000	0	0	0	0	0	0	487.038	1	1	48.5334	27.6667
DATA	710	9	30	0	0	A_64_P122317	NM_001108031	4326.97	246.219	2.166914e+002	2.186009e+001	274.5	30	6.505072e+000	0	0	0	0	0	0	213.413	1	1	47.5395	29.0857
DATA	711	9	31	0	0	A_64_P065492	NM_001109101	4352.42	246.427	3.139300e+001	4.261688e+000	91.5	30	5.931230e+000	0	0	0	0	0	0	30.9273	1	1	57.5363	29.2222
DATA	712	9	32	0	0	A_64_P129273	NM_001105871	4377.67	246.5	7.731537e+001	8.251187e+000	134	28.5	6.520785e+000	0	0	0	0	0	0	76.1747	1	1	57.5363	28.7778
DATA	713	9	33	0	0	A_64_P050748	NM_181824	4403.42	246.427	4.045963e+001	4.967653e+000	99.5	31.5	7.965443e+000	0	0	0	0	0	0	39.8571	1	1	57.5363	32
DATA	714	9	34	0	0	A_42_P689755	NM_053306	4428.58	246.427	3.154370e+001	4.273552e+000	93	29	7.107186e+000	0	0	0	0	0	0	31.0638	1	1	57.5363	30.0625
DATA	715	9	35	0	0	A_64_P039586	TC635481	4453.96	246.145	3.237606e+002	3.250434e+001	378	27	6.121819e+000	0	0	0	0	0	0	318.655	1	1	46.8651	27.32
DATA	716	9	36	0	0	A_64_P083474	NM_001134731	4479.09	246.104	8.884017e+003	8.884064e+002	8652	32	6.592315e+000	0	0	0	0	0	0	8737.6	1	1	46.8651	32.7
DATA	718	9	38	0	0	A_42_P763553	NM_001107486	4530.25	246.373	1.300029e+002	1.331825e+001	188	31	7.075218e+000	0	0	0	0	0	0	127.603	1	1	49.1849	29.9394
DATA	719	9	39	0	0	A_44_P151513	NM_001000901	4555.7	246.727	6.812911e+000	2.975518e+000	64	33	9.310201e+000	0	0	0	0	0	0	6.67866	1	0	49.8279	31.9565
DATA	720	9	40	0	0	A_42_P460204	ENSRNOT00000020886	4580.65	246.494	3.751216e+002	3.762416e+001	427	29.5	5.488203e+000	0	0	0	0	0	0	367.178	1	1	49.8279	28.75
DATA	721	9	41	0	0	A_44_P218147	NM_001013432	4606.13	245.986	3.710276e+001	4.712810e+000	96	31	7.426978e+000	0	0	0	0	0	0	36.2533	1	1	46.8651	29.08
DATA	722	9	42	0	0	A_42_P554722	NM_001099758	4631.59	246.284	1.244200e+004	1.244203e+003	12068	29	9.180327e+000	0	0	0	0	0	0	12134.8	1	1	48.5334	31.1818
DATA	723	9	43	0	0	A_44_P135450	XM_223143	4657.33	246.5	3.136360e+002	3.149898e+001	373.5	36	8.684839e+000	0	0	0	0	0	0	305.265	1	1	57.5363	34.7667
DATA	724	9	44	0	0	A_64_P107329	NM_001013207	4682.34	246.388	9.154798e+003	9.154845e+002	8548.5	31.5	8.932922e+000	0	0	0	0	0	0	8890.76	1	1	45.835	32.8333
DATA	725	9	45	0	0	A_64_P116219	NM_001004085	4707.75	246.658	1.549532e+004	1.549535e+003	14529	33	9.251638e+000	0	0	0	0	0	0	15012.8	1	1	48.2044	33.0303
DATA	726	9	46	0	0	A_44_P147396	NM_001191744	4733.42	246.573	3.206632e+001	4.349298e+000	92	28.5	6.846511e+000	0	0	0	0	0	0	30.9864	1	1	57.5363	28.4333
DATA	727	9	47	0	0	A_44_P975743	TC626448	4758.68	246.605	1.360115e+003	1.360434e+002	1302	34	7.488453e+000	0	0	0	0	0	0	1310.72	1	1	49.5074	32.6667
DATA	728	9	48	0	0	A_42_P728472	NM_001007600	4783.91	246.797	7.081434e+003	7.081495e+002	6612	31	7.019103e+000	0	0	0	0	0	0	6804.75	1	1	47.8731	30.963
DATA	729	9	49	0	0	A_64_P130139	NM_013181	4809.27	246.432	1.224725e+004	1.224729e+003	11523.5	30.5	8.184037e+000	0	0	0	0	0	0	11732	1	1	48.8603	31.5385
DATA	730	9	50	0	0	A_42_P481087	XM_232226	4834.67	246.443	1.381868e+003	1.382188e+002	1341	28	7.653659e+000	0	0	0	0	0	0	1319.47	1	1	47.5395	30.3871
DATA	731	9	51	0	0	A_44_P102465	NM_001000424	4860.42	246.573	6.349247e+001	7.015427e+000	122	28.5	7.899082e+000	0	0	0	0	0	0	60.4189	1	1	57.5363	28.6071
DATA	732	9	52	0	0	A_64_P082557	ENSRNOT00000029274	4885.58	246.573	1.855540e+001	3.522617e+000	78	31	9.609328e+000	0	0	0	0	0	0	17.5955	1	1	65	33.6842
DATA	733	9	53	0	0	A_64_P064873	XM_228599	4911.19	246.57	4.213276e+001	5.175343e+000	98	29.5	7.834413e+000	0	0	0	0	0	0	39.8054	1	1	58.0869	30.0938
DATA	734	9	54	0	0	A_64_P042298	A_64_P042298	4936.77	246.689	8.398020e+001	8.923480e+000	136.5	32	8.514377e+000	0	0	0	0	0	0	79.0387	1	1	49.1849	32.1935
DATA	735	9	55	0	0	A_44_P286341	ENSRNOT00000038519	4962.09	246.8	1.546241e+001	3.400612e+000	74	32	7.038988e+000	0	0	0	0	0	0	14.4957	1	1	45.835	32.2121
DATA	736	9	56	0	0	A_44_P994614	NM_001106646	4987.42	246.573	4.167801e+004	4.167802e+003	38201	32	7.739852e+000	0	0	0	0	0	0	38912.7	1	1	57.5363	32.9697
DATA	737	9	57	0	0	A_64_P098354	XM_001066867	5012.71	246.63	1.645919e+002	1.674011e+001	213.5	29	8.231981e+000	0	0	0	0	0	0	153.033	1	1	48.5334	31.4
DATA	738	9	58	0	0	A_64_P117373	NM_001107752	5038.09	246.614	7.779575e+001	8.362326e+000	132	33	9.577812e+000	0	0	0	0	0	0	72.0216	1	1	65	33.3
DATA	739	9	59	0	0	A_64_P111395	ENSRNOT00000025391	5063.62	246.838	3.292845e+002	3.307223e+001	359	31.5	7.709679e+000	0	0	0	0	0	0	303.506	1	1	48.5334	31.4286
DATA	740	9	60	0	0	A_64_P059465	XM_229201	5088.74	246.926	1.354955e+001	3.377950e+000	72.5	29.5	6.555444e+000	0	0	0	0	0	0	12.4334	1	0	45.835	30.4231
DATA	741	9	61	0	0	A_64_P010852	NM_001106214	5114.5	247	2.586555e+004	2.586557e+003	23255	26.5	7.162199e+000	0	0	0	0	0	0	23624.4	1	1	54.1152	27.5833
DATA	742	9	62	0	0	A_64_P024967	NM_001008359	5139.5	247	6.868140e+001	7.544902e+000	122.5	28.5	7.187861e+000	0	0	0	0	0	0	62.4409	1	1	54.1152	29.0357
DATA	743	9	63	0	0	A_44_P278418	NM_012538	5165	247	2.376038e+001	3.936221e+000	82	28.5	8.355602e+000	0	0	0	0	0	0	21.498	1	1	65	29.6667
DATA	744	9	64	0	0	A_44_P821875	NM_001009500	5190.64	247.072	3.997553e+001	5.091706e+000	95	29	6.512316e+000	0	0	0	0	0	0	35.9929	1	1	46.5243	29.2222
DATA	745	9	65	0	0	A_64_P066737	A_64_P066737	5215.5	247	6.008662e+001	6.793059e+000	117	30	8.598516e+000	0	0	0	0	0	0	53.8396	1	1	54.1152	31.5313
DATA	746	9	66	0	0	A_64_P003943	TC616650	5241.6	246.647	8.264411e+001	8.857026e+000	132.5	29	8.205039e+000	0	0	0	0	0	0	73.6684	1	1	46.8651	28.5862
DATA	747	9	67	0	0	A_64_P047035	ENSRNOT00000066263	5266.62	246.821	1.224126e+001	3.427149e+000	73	29	7.920859e+000	0	0	0	0	0	0	10.8582	1	0	49.5074	29.36
DATA	748	9	68	0	0	A_64_P113867	NM_001077201	5292.18	246.958	4.182265e+002	4.194622e+001	432	29	6.071439e+000	0	0	0	0	0	0	369.091	1	1	46.8651	30.0645
DATA	749	9	69	0	0	A_64_P013758	NM_012582	5317.5	247	9.914570e+001	1.042863e+001	141	31.5	7.407747e+000	0	0	0	0	0	0	87.0532	1	1	54.1152	32.2333
DATA	750	9	70	0	0	A_44_P303982	NM_001106381	5342.5	247	8.507716e+001	9.107425e+000	135	28	7.348469e+000	0	0	0	0	0	0	74.3234	1	1	65	30
DATA	751	9	71	0	0	A_64_P048601	A_64_P048601	5368.44	247.028	4.129920e+002	4.142824e+001	420	28	7.250921e+000	0	0	0	0	0	0	358.895	1	1	48.2044	28.1
DATA	752	9	72	0	0	A_44_P304880	NM_001014261	5393.7	247.1	7.837266e+001	8.497561e+000	131	28	8.073029e+000	0	0	0	0	0	0	67.7585	1	1	47.2035	29.4074
DATA	753	9	73	0	0	A_64_P096767	ENSRNOT00000039549	5419	247	6.123372e+000	3.357526e+000	66	27.5	5.672681e+000	0	0	0	0	0	0	5.26675	1	0	54.9904	27.6
DATA	754	9	74	0	0	A_43_P21810	NM_001025000	5444.49	247.07	2.394079e+001	4.091802e+000	81	27.5	7.355584e+000	0	0	0	0	0	0	20.4855	1	1	47.8731	28.7692
DATA	756	9	76	0	0	A_64_P084976	NM_001008916	5495.39	247.069	4.343127e+000	3.380639e+000	62	31	7.609302e+000	0	0	0	0	0	0	3.67827	1	0	53.8203	30.5172
DATA	757	9	77	0	0	A_64_P040004	XM_001054754	5520.5	246.743	3.719316e+003	3.719468e+002	3045	31	6.024502e+000	0	0	0	0	0	0	3133.91	1	1	47.2035	30.8065
DATA	758	9	78	0	0	A_64_P156785	XM_001058828	5545.91	247.386	7.745827e+000	3.473712e+000	67	30	6.795458e+000	0	0	0	0	0	0	6.49493	1	0	65	30.0588
DATA	759	9	79	0	0	A_64_P123914	XM_217505	5571.58	247.214	2.150706e+004	2.150708e+003	17930	30.5	5.978221e+000	0	0	0	0	0	0	17942.6	1	1	51.4001	30
DATA	760	9	80	66	1	DarkCorner	DarkCorner	5596.58	247.427	3.433124e+000	3.419762e+000	53	30.5	7.031166e+000	0	0	0	0	0	0	-5.45213	0	0	57.5363	31.1389
DATA	761	9	81	66	1	DarkCorner	DarkCorner	5622.92	247.515	3.450275e+000	3.436846e+000	52	31	6.046850e+000	0	0	0	0	0	0	-7.46596	0	0	45.4864	30.5758
DATA	762	9	82	66	1	DarkCorner	DarkCorner	5647.65	247.222	3.466506e+000	3.453014e+000	57	27.5	5.903612e+000	0	0	0	0	0	0	-2.01029	0	0	47.5395	27.3
DATA	763	9	83	66	1	DarkCorner	DarkCorner	5672.87	247.183	3.482552e+000	3.468998e+000	54	29.5	7.313749e+000	0	0	0	0	0	0	-5.05183	0	0	46.8651	31.1563
DATA	764	9	84	66	1	DarkCorner	DarkCorner	5698.51	247.584	3.498097e+000	3.484482e+000	56	31	5.579036e+000	0	0	0	0	0	0	-4.16695	0	0	52.9257	31.05
DATA	765	9	85	66	1	DarkCorner	DarkCorner	5724.01	247.128	3.514066e+000	3.506651e+000	60.5	30	9.230229e+000	0	0	0	0	0	0	1.69911	0	0	49.1849	31.3953
DATA	766	10	1	66	1	DarkCorner	DarkCorner	3603.42	253.427	5.281725e+000	3.190980e+000	65	27.5	8.077830e+000	0	0	0	0	0	0	4.76551	1	0	57.5363	28.0625
DATA	767	10	2	66	1	DarkCorner	DarkCorner	3628.42	253.178	3.142536e+000	3.130305e+000	56	29	7.904137e+000	0	0	0	0	0	0	-1.74521	0	0	48.2044	28.6538
DATA	768	10	3	66	1	DarkCorner	DarkCorner	3654.37	253	3.125650e+000	3.113485e+000	57	28	6.068959e+000	0	0	0	0	0	0	-3.09539	0	0	45.4864	28.0323
DATA	769	10	4	66	1	DarkCorner	DarkCorner	3679.91	253.152	3.109356e+000	3.097254e+000	57	28	4.369986e+000	0	0	0	0	0	0	-4.11472	0	0	46.1809	29.25
DATA	770	10	5	66	1	DarkCorner	DarkCorner	3705.32	253.444	3.093597e+000	3.081556e+000	55.5	29	7.789456e+000	0	0	0	0	0	0	-4.06745	0	0	53.5237	30.1714
DATA	771	10	6	66	1	DarkCorner	DarkCorner	3730.78	253.757	3.078354e+000	3.066373e+000	57	30	7.367884e+000	0	0	0	0	0	0	-2.94951	0	0	48.8603	30.6667
DATA	772	10	7	0	0	A_64_P139937	XM_001070013	3755.58	253.427	6.565225e+000	3.122297e+000	66	29	9.509248e+000	0	0	0	0	0	0	6.1069	1	0	57.5363	30.6774
DATA	773	10	8	0	0	A_44_P185613	XM_001080030	3781.11	253.5	1.406125e+002	1.438580e+001	190.5	29.5	9.162477e+000	0	0	0	0	0	0	131.398	1	1	65	30.5588
DATA	774	10	9	0	0	A_42_P738520	NM_001007746	3806.43	252.768	1.579185e+003	1.579475e+002	1518	32	1.014359e+001	0	0	0	0	0	0	1481.97	1	1	46.8651	34.3226
DATA	775	10	10	66	-1	(-)3xSLv1	NegativeControl	3831.62	253.051	3.024619e+000	3.012847e+000	52	30	7.164728e+000	0	0	0	0	0	0	-8.0943	0	0	49.5074	29.8889
DATA	776	10	11	0	0	A_42_P626023	NM_001107265	3857.42	253.427	8.146799e+002	8.152322e+001	803	32	5.430697e+000	0	0	0	0	0	0	770.995	1	1	57.5363	30.6774
DATA	777	10	12	0	0	A_43_P11120	XR_085824	3882.37	253.209	3.015066e+003	3.015214e+002	2830	28.5	6.927821e+000	0	0	0	0	0	0	2864.17	1	1	46.1809	29.9286
DATA	778	10	13	0	0	A_42_P473425	NM_138844	3908.11	253.5	7.234218e+001	7.823067e+000	131	28	7.425617e+000	0	0	0	0	0	0	68.983	1	1	56.9804	29.8387
DATA	779	10	14	0	0	A_44_P692981	ENSRNOT00000007422	3933.5	253.5	4.581416e+001	5.458365e+000	102	32.5	9.033930e+000	0	0	0	0	0	0	43.8406	1	1	57.5363	32.5313
DATA	780	10	15	0	0	A_64_P102366	A_64_P102366	3958.73	253.5	3.790095e+001	4.807403e+000	98	32.5	7.725448e+000	0	0	0	0	0	0	36.3885	1	1	49.1849	32.1429
DATA	781	10	16	0	0	A_42_P616287	NM_001134555	3983.87	253.623	1.472670e+002	1.501890e+001	197	27	4.868501e+000	0	0	0	0	0	0	141.834	1	1	46.8651	27.2333
DATA	782	10	17	0	0	A_64_P073995	XM_001081370	4009.5	253.5	2.866606e+001	4.105815e+000	88.5	27	3.763863e+000	0	0	0	0	0	0	27.6904	1	1	57.5363	27.9167
DATA	783	10	18	0	0	A_42_P595381	NM_001107258	4035.11	253.5	3.855154e+003	3.855266e+002	3622	27.5	6.211868e+000	0	0	0	0	0	0	3734.34	1	1	56.9804	27.9286
DATA	784	10	19	0	0	A_42_P462205	NM_001007745	4060.25	253.413	6.768140e+003	6.768203e+002	6274	29	6.188699e+000	0	0	0	0	0	0	6572.66	1	1	48.8603	28.9
DATA	785	10	20	0	0	A_64_P016102	A_64_P016102	4086.07	253.254	2.906737e+001	4.117911e+000	90	29	7.041223e+000	0	0	0	0	0	0	28.2954	1	1	45.835	29.6897
DATA	786	10	21	0	0	A_64_P017829	NM_001128216	4111.33	253.5	1.113366e+001	3.116135e+000	73	27.5	8.630667e+000	0	0	0	0	0	0	10.8618	1	0	65	30.7647
DATA	787	10	22	0	0	A_64_P090244	NM_001127449	4136.58	253.573	1.391658e+005	1.391658e+004	135031	35	1.170085e+001	0	0	0	0	0	0	136037	1	1	57.5363	36.92
DATA	788	10	23	0	0	A_42_P503626	NM_001044247	4162	253.545	5.811357e+001	6.494550e+000	119	29.5	9.079563e+000	0	0	0	0	0	0	56.9082	1	1	55.8519	31.0385
DATA	789	10	24	0	0	A_64_P144850	ENSRNOT00000002335	4187.08	253.243	5.395583e+001	6.123242e+000	114	29	5.602860e+000	0	0	0	0	0	0	52.9171	1	1	48.2044	29.2727
DATA	790	10	25	0	0	A_42_P703023	NM_145776	4212.7	253.1	3.518443e+002	3.530302e+001	403	26	7.333506e+000	0	0	0	0	0	0	345.545	1	1	47.2035	27.0303
DATA	791	10	26	0	0	A_64_P153581	NM_001109367	4238.42	253.573	6.511824e+001	7.123318e+000	123	30	5.421208e+000	0	0	0	0	0	0	64.0328	1	1	57.5363	27.5417
DATA	792	10	27	0	0	A_44_P156782	NM_001013879	4263.5	253.5	1.242565e+003	1.242900e+002	1289	31	8.338475e+000	0	0	0	0	0	0	1223.02	1	1	49.1849	31.1111
DATA	793	10	28	0	0	A_43_P12841	NM_053535	4289	253.545	2.124972e+002	2.144433e+001	268.5	28	6.642155e+000	0	0	0	0	0	0	209.318	1	1	55.8519	27.2414
DATA	794	10	29	0	0	A_64_P097715	NM_001135710	4314.39	254.014	1.451439e+002	1.479750e+001	202	29	6.290295e+000	0	0	0	0	0	0	143.063	1	1	47.8731	27.8667
DATA	795	10	30	0	0	A_42_P769597	NM_001106230	4339.74	253.647	1.121838e+003	1.122208e+002	1135	27	6.405978e+000	0	0	0	0	0	0	1106.11	1	1	51.7088	28.3548
DATA	796	10	31	0	0	A_42_P561835	ENSRNOT00000043937	4364.85	253.836	2.232206e+002	2.250698e+001	270	29.5	7.050619e+000	0	0	0	0	0	0	220.133	1	1	47.5395	29.4706
DATA	797	10	32	0	0	A_42_P604399	NM_012941	4390.3	253.9	1.874749e+004	1.874751e+003	18343.5	31	7.034317e+000	0	0	0	0	0	0	18487.8	1	1	47.2035	30.9667
DATA	798	10	33	0	0	A_42_P744495	NM_017125	4415.67	253.543	2.316747e+003	2.316926e+002	2232	31	6.876998e+000	0	0	0	0	0	0	2284.03	1	1	47.5395	31.3103
DATA	799	10	34	0	0	A_64_P047391	A_64_P047391	4441.43	253.724	4.595113e+002	4.604137e+001	515	28	6.655073e+000	0	0	0	0	0	0	452.835	1	1	48.5334	28.04
DATA	800	10	35	0	0	A_44_P856007	NM_001108489	4466.5	253.556	1.080441e+002	1.118247e+001	168	29	6.375255e+000	0	0	0	0	0	0	106.406	1	1	47.8731	29.5185
DATA	801	10	36	0	0	A_64_P057562	ENSRNOT00000031129	4492.13	253.574	5.314124e+002	5.321952e+001	579	29	6.767060e+000	0	0	0	0	0	0	522.922	1	1	46.5243	30.6897
DATA	802	10	37	0	0	A_64_P102395	ENSRNOT00000029656	4517.25	253.987	1.687534e+002	1.712072e+001	233	29	6.007701e+000	0	0	0	0	0	0	165.899	1	1	49.1849	29.3226
DATA	803	10	38	0	0	A_64_P132318	NM_133296	4542.91	253.935	2.717158e+002	2.732503e+001	329	29.5	6.535516e+000	0	0	0	0	0	0	266.792	1	1	54.4085	28.75
DATA	805	10	40	0	0	A_64_P158848	NM_001130540	4593.63	254	1.980734e+003	1.980947e+002	1965	30.5	6.757332e+000	0	0	0	0	0	0	1939.07	1	1	46.5243	29.3077
DATA	806	10	41	0	0	A_64_P302888	NM_001135015	4619.1	253.812	6.070364e+001	6.729939e+000	120	27	8.870213e+000	0	0	0	0	0	0	59.3196	1	1	46.8651	28.7143
DATA	807	10	42	0	0	A_42_P604331	NM_001108533	4644.5	254	9.412435e+004	9.412435e+003	91579.5	32.5	8.705180e+000	0	0	0	0	0	0	91800.9	1	1	54.1152	32.3611
DATA	808	10	43	0	0	A_64_P166406	NM_019152	4669.57	253.769	6.578905e+002	6.585371e+001	680	33	6.653821e+000	0	0	0	0	0	0	640.28	1	1	45.4864	33.76
DATA	809	10	44	0	0	A_64_P123660	NM_001031655	4694.84	253.897	1.962478e+003	1.962696e+002	1832.5	33	7.615399e+000	0	0	0	0	0	0	1905.6	1	1	46.5243	32.0741
DATA	810	10	45	0	0	A_42_P668800	NM_001127553	4720.5	254	1.754935e+003	1.755180e+002	1680.5	31	8.288821e+000	0	0	0	0	0	0	1699.82	1	1	48.5334	30.7273
DATA	811	10	46	0	0	A_64_P090458	NM_001109516	4746	254	7.376736e+000	3.030427e+000	66	30	6.447244e+000	0	0	0	0	0	0	7.12607	1	0	54.9904	29.4815
DATA	812	10	47	0	0	A_42_P635396	NM_001109506	4771.38	254	3.126780e+003	3.126919e+002	3066	31.5	7.335945e+000	0	0	0	0	0	0	3012.03	1	1	48.5334	30.6667
DATA	813	10	48	0	0	A_64_P002989	NM_031604	4796.61	254.069	9.669127e+004	9.669127e+003	92455	30.5	9.043426e+000	0	0	0	0	0	0	92868.4	1	1	53.8203	32.5455
DATA	814	10	49	0	0	A_44_P914346	DV717012	4821.91	253.896	1.517223e+003	1.517512e+002	1487	28	8.204127e+000	0	0	0	0	0	0	1452.65	1	1	46.8651	31
DATA	815	10	50	0	0	A_44_P791176	NM_001130577	4847.5	254	2.977700e+001	4.209486e+000	90	29	9.864806e+000	0	0	0	0	0	0	28.4158	1	1	54.1152	31.2424
DATA	816	10	51	0	0	A_64_P011894	NM_001004210	4873	253.797	2.479250e+004	2.479251e+003	23211	31	7.975568e+000	0	0	0	0	0	0	23576.8	1	1	46.8651	31.9259
DATA	817	10	52	0	0	A_42_P717654	XM_001063683	4898	253.576	4.445931e+003	4.446032e+002	4130	33	9.056829e+000	0	0	0	0	0	0	4212.9	1	1	45.4864	34.1154
DATA	818	10	53	0	0	A_64_P006102	NM_001100784	4923.58	253.901	2.409307e+002	2.428006e+001	285	33	9.113976e+000	0	0	0	0	0	0	227.459	1	1	47.8731	32.8649
DATA	819	10	54	0	0	A_64_P116038	NM_001000335	4949.34	254.071	1.146729e+001	3.229704e+000	72	31	8.884132e+000	0	0	0	0	0	0	10.7841	1	0	46.8651	32.7353
DATA	820	10	55	0	0	A_42_P581567	NM_001011899	4974.5	254.352	1.053772e+002	1.096499e+001	160.5	32	7.169697e+000	0	0	0	1	0	0	98.7131	1	1	57.5363	33.5926
DATA	821	10	56	0	0	A_42_P671206	FQ231880	5000	254.455	1.330972e+003	1.331320e+002	1269.5	34	9.520169e+000	0	0	0	0	0	0	1241.69	1	1	55.8519	34.3143
DATA	823	10	58	0	0	A_64_P078205	NM_001044255	5050.66	254.122	7.126164e+003	7.126230e+002	6339	33	9.756266e+000	0	0	0	0	0	0	6591.27	1	1	48.8603	32.5517
DATA	824	10	59	66	-1	(-)3xSLv1	NegativeControl	5076.71	253.79	3.096055e+000	3.084005e+000	54	31	8.328094e+000	0	0	0	0	0	0	-6.35334	0	0	44.7812	32
DATA	825	10	60	0	0	A_44_P259051	NM_001037658	5101.54	254.205	3.964942e+002	3.977023e+001	418	29	8.519428e+000	0	0	0	0	0	0	363.456	1	1	50.1463	30.2258
DATA	826	10	61	0	0	A_64_P325262	A_64_P325262	5127	254.455	3.239831e+001	4.492173e+000	89	29.5	8.158601e+000	0	0	0	0	0	0	29.5625	1	1	65	29.9091
DATA	827	10	62	0	0	A_64_P140005	NM_001191804	5152.42	254.427	1.934638e+001	3.676660e+000	78	28	7.432145e+000	0	0	0	0	0	0	17.5698	1	1	57.5363	28.7333
DATA	828	10	63	0	0	A_42_P588606	NM_001134544	5177.61	254.237	2.480219e+002	2.500036e+001	278.5	29	8.690063e+000	0	0	0	0	0	0	224.171	1	1	49.1849	30.0357
DATA	829	10	64	0	0	A_42_P788541	NM_001106794	5203.06	254.232	6.395072e+003	6.395150e+002	5791.5	31.5	7.998425e+000	0	0	0	1	0	0	5751.99	1	1	46.5243	31.6563
DATA	830	10	65	0	0	A_44_P1050200	NM_001108000	5228.5	254.056	1.697751e+003	1.698048e+002	1566	30	8.298868e+000	0	0	0	0	0	0	1519.46	1	1	48.5334	30.9394
DATA	831	10	66	0	0	A_42_P777935	ENSRNOT00000027369	5253.89	254.5	2.396508e+002	2.417621e+001	274	31.5	8.640988e+000	0	0	0	0	0	0	213.437	1	1	56.9804	31
DATA	832	10	67	0	0	A_44_P349475	NM_031333	5279.36	254.13	9.298933e+002	9.304453e+001	854	29	6.248200e+000	0	0	0	0	0	0	823.953	1	1	46.8651	28.96
DATA	833	10	68	0	0	A_64_P136188	XM_001059617	5304.58	254.427	2.791809e+002	2.810322e+001	302	32	5.383842e+000	0	0	0	0	0	0	246.148	1	1	57.5363	32.2963
DATA	834	10	69	0	0	A_64_P023386	NM_001106232	5330.11	254.5	4.669911e+004	4.669912e+003	41000	30	9.949297e+000	0	0	0	0	0	0	40963.9	1	1	56.9804	32.6667
DATA	835	10	70	0	0	A_64_P048576	NM_001000163	5355.5	254.5	6.685241e+001	7.434912e+000	116.5	28	7.446856e+000	0	0	0	0	0	0	58.3429	1	1	57.5363	29.2069
DATA	836	10	71	1028	1	(+)E1A_r60_a20	E1A_r60_a20	5380.89	254.5	2.141141e+001	3.908854e+000	77	29	7.919466e+000	0	0	0	0	0	0	18.5904	1	1	65	30.2222
DATA	837	10	72	0	0	A_64_P078510	XM_001053102	5406.54	254.714	4.918736e+002	4.929708e+001	499	28.5	8.391909e+000	0	0	0	0	0	0	424.878	1	1	46.8651	29.3
DATA	838	10	73	0	0	A_64_P101533	A_64_P101533	5431.58	254.573	4.540171e+000	3.334948e+000	62	27.5	5.646597e+000	0	0	0	0	0	0	3.90186	1	0	57.5363	27.8333
DATA	839	10	74	0	0	A_64_P164601	ENSRNOT00000050537	5457.37	254.36	8.759052e+001	9.367599e+000	133	27	6.139490e+000	0	0	0	0	0	0	74.882	1	1	48.8603	27.88
DATA	840	10	75	0	0	A_42_P694928	NM_001109046	5482.5	254.5	3.860315e+002	3.874720e+001	375	30	7.542676e+000	0	0	0	0	0	0	328.373	1	1	57.5363	30.9333
DATA	841	10	76	0	0	A_42_P510565	ENSRNOT00000046259	5507.81	254.261	2.063759e+002	2.090853e+001	231	31	6.064879e+000	0	0	0	0	0	0	174.658	1	1	46.5243	31.1
DATA	842	10	77	0	0	A_64_P050877	XM_001081816	5533.34	254.429	1.955534e+001	3.897899e+000	75	31	7.717675e+000	0	0	0	0	0	0	16.4672	1	1	49.8279	32
DATA	843	10	78	0	0	A_44_P281352	NM_001013076	5558.58	254.573	2.374045e+002	2.398104e+001	256	29	5.724442e+000	0	0	0	0	0	0	198.937	1	1	57.5363	29
DATA	844	10	79	0	0	A_44_P269675	ENSRNOT00000031839	5584	254.545	2.543003e+002	2.565699e+001	269	32	8.377028e+000	0	0	0	0	0	0	212.051	1	1	55.8519	32.7857
DATA	845	10	80	66	1	DarkCorner	DarkCorner	5609.84	254.851	3.434983e+000	3.421614e+000	57.5	30	5.488902e+000	0	0	0	0	0	0	-1.08165	0	0	46.1809	30.1463
DATA	846	10	81	66	1	DarkCorner	DarkCorner	5634.77	254.5	3.451342e+000	3.437909e+000	52	28	7.236153e+000	0	0	0	0	0	0	-6.91168	0	0	51.0895	28.4762
DATA	847	10	82	66	1	DarkCorner	DarkCorner	5660.63	254.37	3.467843e+000	3.454345e+000	55	31	7.995864e+000	0	0	0	0	0	0	-2.26807	0	0	50.7771	30.4231
DATA	848	10	83	66	1	DarkCorner	DarkCorner	5685.85	254.941	3.482954e+000	3.469399e+000	57	31	6.685183e+000	0	0	0	0	0	0	-1.06187	0	0	46.8651	30.975
DATA	849	10	84	66	1	DarkCorner	DarkCorner	5710.78	255.103	3.497938e+000	3.497373e+000	60.5	30	8.044738e+000	0	0	0	0	0	0	2.45974	0	0	46.1809	32.303
DATA	850	10	85	66	1	DarkCorner	DarkCorner	5736.88	254.898	3.513604e+000	3.499929e+000	52	25	6.953603e+000	0	0	0	0	0	0	-5.63093	0	0	52.9257	26.2245
DATA	851	11	1	66	1	DarkCorner	DarkCorner	3590.58	260.427	6.679955e+000	3.220870e+000	66.5	26	6.569812e+000	0	0	0	0	0	0	6.01968	1	0	65	25.9385
DATA	852	11	2	66	1	DarkCorner	DarkCorner	3616.16	260.107	3.145992e+000	3.133747e+000	57.5	27	5.623274e+000	0	0	0	0	0	0	-2.79186	0	0	47.8731	26.6061
DATA	853	11	3	66	1	DarkCorner	DarkCorner	3641.5	260.5	3.129018e+000	3.116839e+000	59	28	7.030054e+000	0	0	0	0	0	0	-2.31423	0	0	57.5363	28.037
DATA	854	11	4	66	1	DarkCorner	DarkCorner	3667.16	260.563	3.112590e+000	3.100475e+000	51	30	5.881907e+000	0	0	0	0	0	0	-7.31824	0	0	47.5395	29.4444
DATA	855	11	5	66	1	DarkCorner	DarkCorner	3692.35	260.313	3.097177e+000	3.085123e+000	57	30	4.703923e+000	0	0	0	0	0	0	-2.36427	0	0	50.7771	29.4242
DATA	856	11	6	66	1	DarkCorner	DarkCorner	3717.54	260.474	3.082035e+000	3.070039e+000	57	30	7.768716e+000	0	0	0	0	0	0	-1.65809	0	0	49.5074	31
DATA	857	11	7	0	0	A_64_P077381	A_64_P077381	3743.23	260.845	2.154285e+001	3.738251e+000	81	30	7.874008e+000	0	0	0	0	0	0	20.0219	1	1	47.5395	29
DATA	858	11	8	0	0	A_64_P085926	NM_030860	3768.33	260.747	1.602288e+003	1.602576e+002	1560	34	9.029099e+000	0	0	0	0	0	0	1495.92	1	1	49.1849	32.8966
DATA	859	11	9	0	0	A_42_P598560	NM_001033693	3793.67	260.443	1.507843e+003	1.508147e+002	1394	31	6.452986e+000	0	0	0	0	0	0	1413.92	1	1	47.5395	31.4444
DATA	860	11	10	0	1	ETG08_142674	ETG08_142674	3819.33	260.5	3.026717e+000	3.022215e+000	63	34.5	9.993389e+000	0	0	0	0	0	0	1.97405	0	0	57.5363	35.1667
DATA	861	11	11	0	0	A_42_P724142	NM_001106340	3844.46	260.614	1.834608e+003	1.834854e+002	1774.5	33	8.528422e+000	0	0	0	0	0	0	1734.86	1	1	47.5395	32.3448
DATA	862	11	12	0	0	A_64_P054193	NM_001014193	3870	260.545	4.351505e+004	4.351506e+003	40972	32	7.511895e+000	0	0	0	0	0	0	41311.7	1	1	55.8519	30.8333
DATA	863	11	13	0	0	A_42_P750554	NM_001107846	3895.07	260.74	1.478978e+003	1.479278e+002	1381.5	31	9.462917e+000	0	0	0	0	0	0	1409.36	1	1	47.8731	31.2414
DATA	864	11	14	0	0	A_44_P285547	NM_053393	3920.4	260.829	1.014482e+002	1.057035e+001	159.5	31	8.916001e+000	0	0	0	0	0	0	97.02	1	1	47.2035	30.931
DATA	865	11	15	0	0	A_42_P623374	NM_138845	3945.82	260.958	1.579303e+003	1.579580e+002	1504	32	5.930884e+000	0	0	0	1	0	0	1515.55	1	1	46.8651	31.1538
DATA	866	11	16	0	0	A_64_P064888	NM_001127303	3971.58	260.573	2.310192e+002	2.328943e+001	279	30	7.837324e+000	0	0	0	0	0	0	222.404	1	1	57.5363	30.931
DATA	867	11	17	0	0	A_44_P522406	NM_001001103	3997	260.545	4.615200e+001	5.472337e+000	105	27	4.420233e+000	0	0	0	0	0	0	44.5655	1	1	55.8519	28
DATA	868	11	18	0	0	A_42_P660129	NM_130422	4022.42	260.573	3.779601e+001	4.783589e+000	98	29	6.826908e+000	0	0	0	0	0	0	36.6007	1	1	57.5363	29.24
DATA	869	11	19	0	0	A_64_P035679	A_64_P035679	4047.58	260.573	5.261122e+004	5.261123e+003	50657	28.5	7.791909e+000	0	0	0	0	0	0	51081.2	1	1	57.5363	28.9231
DATA	870	11	20	0	0	A_64_P118862	NM_001191999	4073.14	260.593	7.553893e+001	8.097619e+000	136	29	5.538108e+000	0	0	0	0	0	0	73.5239	1	1	56.9804	29.6786
DATA	871	11	21	0	0	A_42_P638181	NM_133395	4098.44	261.027	7.044372e+003	7.044432e+002	6719	28	6.563459e+000	0	0	0	0	0	0	6872.33	1	1	48.5334	28.7429
DATA	872	11	22	0	0	A_44_P423803	NM_031144	4123.91	260.614	1.310600e+004	1.310603e+003	12961	30.5	9.250054e+000	0	0	0	0	0	0	12811.7	1	1	57.259	32.2813
DATA	874	11	24	0	0	A_44_P445195	NM_133300	4174.7	260.9	1.454136e+003	1.454424e+002	1467	30	6.577565e+000	0	0	0	0	0	0	1426.57	1	1	47.2035	30.3333
DATA	875	11	25	0	0	A_42_P563276	NM_013093	4200.19	260.657	1.458447e+002	1.486807e+001	209	30	5.434557e+000	0	0	0	0	0	0	143.286	1	1	45.835	29.3077
DATA	876	11	26	0	0	A_42_P535608	NM_001107160	4225.55	260.682	1.301936e+002	1.333549e+001	187	27	6.369582e+000	0	0	0	0	0	0	128.072	1	1	45.835	27.4063
DATA	877	11	27	0	0	A_44_P233080	ENSRNOT00000026303	4251.06	260.687	8.603270e+003	8.603318e+002	8444	33	6.412157e+000	0	0	0	0	0	0	8472.12	1	1	45.835	32.4828
DATA	878	11	28	0	0	A_43_P13320	NM_138880	4276.38	260.5	1.469273e+001	3.233966e+000	74.5	31	8.513988e+000	0	0	0	0	0	0	14.4809	1	1	42.2201	31.1081
DATA	879	11	29	0	0	A_42_P548007	NM_001135020	4301.75	261	1.170325e+004	1.170328e+003	11528	29	4.527693e+000	0	0	0	0	0	0	11542.9	1	1	49.1849	28.8
DATA	880	11	30	0	0	A_44_P282853	NM_031983	4326.94	261.101	3.303054e+003	3.303179e+002	3241	28	5.709976e+000	0	0	0	0	0	0	3259.35	1	1	46.8651	29.0938
DATA	881	11	31	0	0	A_42_P552341	NM_053519	4352.5	261	6.014327e+002	6.021203e+001	637	25	5.994816e+000	0	0	0	0	0	0	593.625	1	1	48.5334	26.3429
DATA	882	11	32	0	0	A_64_P031476	NM_001107172	4377.92	261	1.628511e+002	1.653721e+001	224	30	8.483181e+000	0	0	0	0	0	0	160.747	1	1	46.8651	30.6333
DATA	883	11	33	0	0	A_42_P620762	NM_024403	4403.36	260.781	2.161567e+004	2.161569e+003	20949	28	7.174477e+000	0	0	0	0	0	0	21332.9	1	1	44.7812	28.8387
DATA	884	11	34	0	0	A_64_P135370	A_64_P135370	4428.75	261	4.885669e+002	4.894138e+001	552	31	8.285160e+000	0	0	0	0	0	0	482.029	1	1	49.1849	31.4815
DATA	885	11	35	0	0	A_42_P576202	NM_001108583	4453.77	260.899	1.450081e+003	1.450367e+002	1418	29	5.604485e+000	0	0	0	0	0	0	1429.91	1	1	46.5243	28.1111
DATA	886	11	36	0	0	A_64_P022879	NM_001109019	4479.5	261	3.020364e+001	4.174420e+000	90	31	6.386835e+000	0	0	0	0	0	0	29.762	1	1	54.1152	31.3333
DATA	887	11	37	0	0	A_42_P711589	NM_022948	4504.72	261.095	8.974810e+003	8.974857e+002	8638	28	6.084996e+000	0	0	0	0	0	0	8835.63	1	1	48.8603	29.625
DATA	888	11	38	0	0	A_64_P007244	A_64_P007244	4530.66	261.091	6.574107e+003	6.574171e+002	6415	29	7.621242e+000	0	0	0	0	0	0	6464.81	1	1	49.1849	29.6
DATA	889	11	39	0	0	A_42_P477625	NM_001108719	4555.44	261.027	4.729508e+003	4.729597e+002	4486	30	7.316221e+000	0	0	0	0	0	0	4644.93	1	1	48.5334	29.2069
DATA	890	11	40	0	0	A_64_P153091	XM_341223	4581.13	261.184	1.367956e+003	1.368263e+002	1345	28	6.749697e+000	0	0	0	0	0	0	1341.5	1	1	51.7088	28.5926
DATA	891	11	41	0	0	A_64_P016347	NM_130819	4606.25	260.69	3.332461e+000	2.919463e+000	64.5	31	8.395187e+000	0	0	0	0	0	0	3.26239	1	0	46.8651	30.3333
DATA	892	11	42	0	0	A_42_P495598	NM_001014026	4631.58	261.427	2.916831e+000	2.905662e+000	59	30	7.194383e+000	0	0	0	0	0	0	0.318975	0	0	65	29.6774
DATA	893	11	43	0	0	A_42_P759043	NM_001134509	4657.03	260.723	7.242248e+002	7.248099e+001	745	33	5.990140e+000	0	0	0	0	0	0	706.245	1	1	45.4864	33.8966
DATA	894	11	44	0	0	A_64_P071595	XM_002728361	4682.5	260.861	1.005571e+001	3.086500e+000	71	33	7.500667e+000	0	0	0	0	0	0	9.7845	1	0	47.8731	32.48
DATA	895	11	45	0	0	A_42_P780882	NM_001008511	4707.76	261.141	8.304828e+003	8.304880e+002	7963	32	7.253744e+000	0	0	0	0	0	0	8061.97	1	1	47.5395	31.1714
DATA	896	11	46	0	0	A_64_P044420	NM_001134983	4733.42	260.773	7.813862e+001	8.346068e+000	135.5	28	7.976487e+000	0	0	0	0	0	0	75.654	1	1	46.1809	28.9286
DATA	897	11	47	0	0	A_64_P000596	NM_001025732	4758.67	261.247	4.666353e+003	4.666446e+002	4478.5	31	5.190376e+000	0	0	0	0	0	0	4506.04	1	1	48.2044	29.76
DATA	898	11	48	0	0	A_44_P468873	ENSRNOT00000015693	4784.42	261.427	2.234753e+001	3.700066e+000	83	31	1.019200e+001	0	0	0	0	0	0	21.5172	1	1	65	34.5758
DATA	900	11	50	0	0	A_42_P727022	NM_001107076	4834.7	261.1	1.199125e+004	1.199128e+003	11106	28	8.537709e+000	0	0	0	0	0	0	11474	1	1	47.2035	30.6774
DATA	901	11	51	0	0	A_64_P135604	NM_001009641	4860.38	261.388	3.475011e+003	3.475139e+002	3331	30	6.976270e+000	0	0	0	0	0	0	3314.01	1	1	52.0157	31.0938
DATA	902	11	52	0	0	A_42_P813939	NM_001108741	4885.58	260.899	2.396674e+003	2.396861e+002	2258	33.5	9.295487e+000	0	0	0	0	0	0	2277.55	1	1	47.2035	33.4643
DATA	903	11	53	0	0	A_64_P052494	A_64_P052494	4911.11	261.5	3.010290e+000	3.005400e+000	61.5	33	7.477745e+000	0	0	0	0	0	0	1.91711	0	0	56.9804	32.3333
DATA	904	11	54	0	0	A_44_P323678	NM_001107651	4936.5	261.5	1.351939e+001	3.299583e+000	74	31	9.827399e+000	0	0	0	0	0	0	12.7535	1	0	57.5363	33.7778
DATA	905	11	55	0	0	A_44_P435764	NM_001191810	4961.89	261.5	1.072190e+001	3.206252e+000	69	34	8.773842e+000	0	0	0	0	0	0	10.0751	1	0	56.9804	34.1379
DATA	906	11	56	0	0	A_42_P688320	NM_001108569	4987.07	261.64	2.586451e+002	2.604181e+001	302	37	1.643767e+001	0	0	0	0	0	0	242.081	1	1	49.1849	40.5
DATA	907	11	57	0	0	A_42_P798500	NM_001014023	5012.63	261.127	5.043277e+002	5.052471e+001	525	28	7.702813e+000	0	0	0	0	0	0	470.025	1	1	47.5395	30.3333
DATA	908	11	58	0	0	A_44_P279083	NM_133401	5038.11	261.5	5.653472e+002	5.661744e+001	583	32	7.481855e+000	0	0	0	0	0	0	524.681	1	1	56.9804	30.5667
DATA	909	11	59	0	0	A_64_P129850	NM_001002855	5063.5	261.5	2.157419e+001	3.754577e+000	78	33.5	6.430087e+000	0	0	0	0	0	0	19.9351	1	1	57.5363	33.7083
DATA	910	11	60	0	0	A_64_P029468	NM_001105784	5088.67	261.5	1.958674e+001	3.655504e+000	78	29	6.244998e+000	0	0	0	0	0	0	18.0188	1	1	57.5363	29.2
DATA	911	11	61	0	0	A_43_P18571	NM_001013965	5114.33	261.5	3.325633e+002	3.340057e+001	370.5	31	9.644169e+000	0	0	0	0	0	0	304.535	1	1	57.5363	32.52
DATA	912	11	62	0	1	ERCC-00104_60	ERCC-00104_60	5139.37	261.267	2.112310e+001	3.763725e+000	80	27	5.224978e+000	0	0	0	0	0	0	19.2536	1	1	49.1849	26.1304
DATA	913	11	63	0	0	A_44_P653701	NM_001106536	5165.19	261.608	1.939659e+002	1.964750e+001	236	27.5	7.007988e+000	0	0	0	0	0	0	175.963	1	1	49.1849	26.7188
DATA	914	11	64	0	0	A_64_P093593	NM_001107077	5190.5	261.5	3.129932e+002	3.145693e+001	334	34	7.849194e+000	0	0	0	0	0	0	282.582	1	1	57.5363	31.7879
DATA	915	11	65	0	0	A_44_P1034793	NM_001008300	5215.86	261.087	7.506783e+002	7.513433e+001	740	31	9.234709e+000	0	0	0	0	0	0	674.404	1	1	46.8651	32.4118
DATA	916	11	66	0	0	A_42_P768355	NM_057130	5241.22	261.176	1.226898e+003	1.227309e+002	1138	32.5	9.667146e+000	0	0	0	0	0	0	1096.85	1	1	48.2044	32.25
DATA	917	11	67	0	0	A_44_P714581	NM_001107480	5266.53	261.278	4.274180e+003	4.274299e+002	3746	30	8.254421e+000	0	0	0	0	0	0	3802.3	1	1	48.2044	30.2759
DATA	918	11	68	0	0	A_64_P084521	NM_019351	5292.1	261.371	7.125037e+003	7.125109e+002	6297	33	4.812963e+000	0	0	0	0	0	0	6306.59	1	1	47.2035	32.2692
DATA	919	11	69	0	0	A_42_P562625	NM_131913	5317.54	261.691	1.892603e+003	1.892878e+002	1686	30.5	5.187873e+000	0	0	0	0	0	0	1666.86	1	1	46.8651	31.6071
DATA	920	11	70	0	0	A_42_P468662	NM_001108886	5342.58	261.573	1.504805e+003	1.505154e+002	1335.5	30	1.090283e+001	0	0	0	1	0	0	1318.67	1	1	57.5363	31.8889
DATA	921	11	71	0	0	A_42_P778587	NM_001135767	5368.08	261.639	3.020133e+002	3.037642e+001	322.5	29.5	7.687687e+000	0	0	0	0	0	0	263.309	1	1	48.5334	31.2857
DATA	922	11	72	0	0	A_64_P139957	NM_001008525	5393.6	261.853	2.254590e+004	2.254592e+003	19283	31	9.118883e+000	0	0	0	0	0	0	19557	1	1	48.8603	31.5333
DATA	923	11	73	0	0	A_44_P318402	NM_001000187	5419	261.545	1.094295e+002	1.142691e+001	154	28	6.417568e+000	0	0	0	0	0	0	94.4329	1	1	55.8519	28
DATA	924	11	74	0	0	A_64_P090359	NM_001033565	5444.55	261.846	1.598470e+001	3.673040e+000	73.5	28	6.214848e+000	0	0	0	0	0	0	13.7246	1	0	44.7812	28.5714
DATA	925	11	75	0	0	A_43_P17778	NM_001134991	5469.66	261.571	2.777757e+001	4.331705e+000	83	31	8.105908e+000	0	0	0	0	0	0	23.7292	1	1	47.5395	31.4667
DATA	926	11	76	0	0	A_64_P093176	A_64_P093176	5495.42	261.573	6.898645e+001	7.665028e+000	121	29	4.805766e+000	0	0	0	0	0	0	58.6315	1	1	57.5363	29.8462
DATA	927	11	77	0	0	A_64_P100123	NM_182821	5520.65	261.916	5.200213e+003	5.200321e+002	4307	30	6.955078e+000	0	0	0	0	0	0	4398.11	1	1	49.8279	29.5429
DATA	928	11	78	0	0	A_44_P426660	NM_001135717	5545.91	261.935	9.497551e+000	3.504931e+000	67	29.5	5.713242e+000	0	0	0	0	0	0	7.99316	1	0	54.4085	28.9375
DATA	929	11	79	0	0	A_42_P696084	NM_031022	5571.3	261.9	3.368753e+003	3.368924e+002	2925	27.5	6.341265e+000	0	0	0	0	0	0	2821.28	1	1	47.2035	28.2857
DATA	930	11	80	66	1	DarkCorner	DarkCorner	5596.5	262	3.419882e+000	3.406571e+000	55	29	6.231553e+000	0	0	0	0	0	0	-3.94309	0	0	54.1152	29.9677
DATA	931	11	81	66	1	DarkCorner	DarkCorner	5622.59	261.676	3.436897e+000	3.423520e+000	50.5	30	6.813189e+000	0	0	0	0	0	0	-8.25194	0	0	47.8731	31.1667
DATA	932	11	82	66	1	DarkCorner	DarkCorner	5647.57	261.797	3.452553e+000	3.439115e+000	53.5	31	7.302743e+000	0	0	0	0	0	0	-4.07372	0	0	46.8651	29.5172
DATA	933	11	83	66	1	DarkCorner	DarkCorner	5672.89	261.632	3.468433e+000	3.454933e+000	55.5	30	8.188739e+000	0	0	0	0	0	0	-2.08973	0	0	48.5334	30.0938
DATA	934	11	84	66	1	DarkCorner	DarkCorner	5698.73	261.906	3.483869e+000	3.470309e+000	54	35	9.579732e+000	0	0	0	0	0	0	-3.48129	0	0	45.4864	35.2333
DATA	935	11	85	66	1	DarkCorner	DarkCorner	5723.5	262	3.498466e+000	3.484850e+000	56	28.5	1.038070e+001	0	0	0	0	0	0	-0.890492	0	0	54.1152	30.0909
DATA	936	12	1	66	1	DarkCorner	DarkCorner	3602.88	268.25	3.149311e+000	3.139259e+000	60	26	6.246622e+000	0	0	0	0	0	0	1.06502	0	0	44.4243	26.0435
DATA	937	12	2	66	1	DarkCorner	DarkCorner	3628.51	267.657	3.132714e+000	3.120521e+000	56	27	6.322413e+000	0	0	0	0	0	0	-3.30869	0	0	47.2035	27.4828
DATA	938	12	3	66	1	DarkCorner	DarkCorner	3654.2	267.667	3.116182e+000	3.104054e+000	58	26	6.584578e+000	0	0	0	0	0	0	-1.15581	0	0	41.0736	27.76
DATA	939	12	4	66	1	DarkCorner	DarkCorner	3679.5	268	3.100217e+000	3.088151e+000	55.5	30	6.260103e+000	0	0	0	0	0	0	-4.01055	0	0	65	28.6444
DATA	940	12	5	66	1	DarkCorner	DarkCorner	3705.13	268.164	3.084691e+000	3.072685e+000	54.5	27.5	5.462113e+000	0	0	0	0	0	0	-5.39162	0	0	41.4593	27.6875
DATA	941	12	6	0	0	A_64_P118227	XM_002728056	3730.5	268	1.906860e+001	3.603901e+000	77	28.5	8.394100e+000	0	0	0	0	0	0	17.7049	1	1	54.1152	30.4333
DATA	942	12	7	0	0	A_64_P051317	NM_130425	3755.5	268	2.716942e+002	2.733943e+001	317	29	8.111295e+000	0	0	0	0	0	0	253.419	1	1	48.5334	30.3103
DATA	943	12	8	0	0	A_42_P756350	NM_021772	3781	268	7.672133e+001	8.248964e+000	129.5	32	8.069990e+000	0	0	0	0	0	0	71.8838	1	1	65	32.5161
DATA	944	12	9	0	0	A_42_P816479	NM_022278	3806.35	267.88	1.591680e+004	1.591683e+003	14453	30	8.260059e+000	0	0	0	0	0	0	14977.4	1	1	50.1463	32
DATA	945	12	10	0	0	A_64_P351634	NM_001029901	3831.63	268	3.047511e+002	3.062290e+001	348.5	30.5	8.405717e+000	0	0	0	0	0	0	287.961	1	1	48.5334	31.2857
DATA	946	12	11	0	0	A_64_P136597	A_64_P136597	3857.15	268	7.783370e+002	7.789122e+001	793	30	7.959741e+000	0	0	0	0	0	0	738.41	1	1	46.8651	29.7667
DATA	947	12	12	0	0	A_64_P052017	ENSRNOT00000033592	3882.77	267.697	2.175427e+001	3.690830e+000	80	32	8.233916e+000	0	0	0	0	0	0	20.7169	1	1	45.4864	31.4063
DATA	948	12	13	0	0	A_44_P444485	TC589779	3907.49	268.054	2.231975e+003	2.232173e+002	2100	30	8.776980e+000	0	0	0	0	0	0	2133.22	1	1	48.5334	31.3462
DATA	949	12	14	0	0	A_44_P147373	XM_226249	3933.34	268.091	2.307336e+003	2.307526e+002	2179	30	5.069039e+000	0	0	0	0	0	0	2213.06	1	1	49.1849	31.1852
DATA	950	12	15	0	0	A_64_P059939	NM_001134540	3958.61	268.069	3.803680e+004	3.803681e+003	35547	32	7.208028e+000	0	0	0	0	0	0	36601.8	1	1	53.8203	32.2069
DATA	951	12	16	0	0	A_42_P637279	NM_012743	3984.17	268.087	1.434218e+001	3.272536e+000	73	29	4.833414e+000	0	0	0	0	0	0	13.8443	1	0	46.8651	29.1563
DATA	952	12	17	0	0	A_42_P771570	XM_001080365	4009.5	267.743	4.796248e+002	4.805209e+001	516	27	5.424614e+000	0	0	0	1	0	0	464.296	1	1	47.2035	27.2333
DATA	953	12	18	0	0	A_43_P12942	NM_053817	4034.84	267.776	7.627271e+003	7.627327e+002	7306.5	27.5	7.446014e+000	0	0	0	0	0	0	7403.64	1	1	46.1809	27.5357
DATA	954	12	19	0	0	A_64_P053307	NM_001191900	4060.5	268.352	1.519155e+001	3.289269e+000	74	30	8.169258e+000	0	0	0	0	0	0	14.7852	1	1	57.5363	29.7667
DATA	955	12	20	0	0	A_42_P595630	NM_001013189	4085.43	267.701	5.317364e+003	5.317444e+002	5127	27.5	5.385058e+000	0	0	0	0	0	0	5186.54	1	1	46.1809	27.3667
DATA	956	12	21	0	0	A_64_P154760	A_64_P154760	4111.42	268.427	4.185594e+002	4.195658e+001	463.5	29	8.084544e+000	0	0	0	0	0	0	409.201	1	1	57.5363	29.7879
DATA	957	12	22	0	0	A_42_P764359	NM_145086	4136.37	268.36	9.639794e+002	9.644152e+001	956	29.5	8.148242e+000	0	0	0	0	0	0	944.223	1	1	48.8603	30.9231
DATA	958	12	23	0	0	A_43_P10405	NM_001109257	4162	268.455	3.464765e+001	4.514175e+000	94	30	7.328982e+000	0	0	0	0	0	0	33.9981	1	1	55.8519	30.2258
DATA	959	12	24	0	0	A_44_P269950	ENSRNOT00000014054	4187.42	268.427	3.590017e+001	4.608194e+000	97	29	6.646228e+000	0	0	0	0	0	0	35.2818	1	1	57.5363	29.8788
DATA	960	12	25	0	0	A_44_P160763	NM_001106513	4212.58	268.427	1.428658e+002	1.457502e+001	197	28.5	7.080641e+000	0	0	0	0	0	0	140.594	1	1	57.5363	28.5294
DATA	961	12	26	0	0	A_64_P127678	NM_001008553	4238.3	268.1	1.187906e+003	1.188255e+002	1191.5	31	7.313022e+000	0	0	0	0	0	0	1170.34	1	1	47.2035	30.1379
DATA	962	12	27	0	0	A_42_P684885	NM_133517	4263.5	268.5	2.890386e+000	2.892363e+000	63	32	7.996715e+000	0	0	0	0	0	0	2.72474	0	0	57.5363	31.6757
DATA	963	12	28	0	0	A_64_P102708	NM_001034149	4289	268.455	1.433303e+001	3.214230e+000	74	30	8.037413e+000	0	0	0	0	0	0	14.1459	1	0	55.8519	31.5
DATA	964	12	29	0	0	A_42_P547629	NM_001106718	4314.32	268.397	5.603259e+002	5.610632e+001	606	27.5	4.402971e+000	0	0	0	0	0	0	553.313	1	1	50.4627	27.1154
DATA	965	12	30	0	0	A_42_P522285	NM_001044263	4339.44	268.468	3.824858e+002	3.835643e+001	419	27	8.083985e+000	0	0	0	0	0	0	377.836	1	1	49.8279	29.0625
DATA	966	12	31	0	0	A_64_P164423	NM_057193	4365.33	268.5	3.025550e+001	4.172888e+000	89.5	27	6.594304e+000	0	0	0	0	0	0	29.8927	1	1	65	26.7879
DATA	967	12	32	0	0	A_44_P256143	NM_001047917	4390.46	268.595	1.597819e+002	1.623459e+001	217	31	8.724576e+000	0	0	0	0	0	0	157.862	1	1	49.1849	31.2414
DATA	968	12	33	0	0	A_44_P727294	NM_001160314	4415.78	268.176	2.122107e+003	2.122301e+002	2114.5	30	7.345610e+000	0	0	0	0	0	0	2096	1	1	48.2044	29.4286
DATA	969	12	34	0	0	A_64_P108404	NM_001000092	4441.41	268.042	7.787471e+001	8.301591e+000	138	30.5	6.427944e+000	0	0	0	0	0	0	76.882	1	1	48.2044	28.9615
DATA	970	12	35	0	0	A_44_P520829	NM_001108777	4466.51	267.806	6.714184e+002	6.720349e+001	718	30.5	4.937425e+000	0	0	0	0	0	0	662.429	1	1	46.5243	29.9667
DATA	971	12	36	0	0	A_44_P229677	NM_001014221	4492.07	267.82	1.912854e+003	1.913071e+002	1942.5	28	5.999664e+000	0	0	0	0	0	0	1885.69	1	1	44.7812	28.4375
DATA	972	12	37	0	0	A_64_P126215	A_64_P126215	4517.5	268.5	1.158583e+001	3.107065e+000	71	28	8.190016e+000	0	0	0	0	0	0	11.4107	1	0	65	29.1724
DATA	973	12	38	0	0	A_64_P090035	A_64_P090035	4542.68	268.405	1.484172e+003	1.484453e+002	1496	27	6.409084e+000	0	0	0	0	0	0	1459.98	1	1	50.4627	27.1724
DATA	974	12	39	0	0	A_64_P089330	ENSRNOT00000012374	4568.62	268.519	1.435154e+002	1.463973e+001	203	30	8.886088e+000	0	0	0	0	0	0	140.977	1	1	49.8279	30.6471
DATA	975	12	40	0	0	A_44_P454429	NM_012712	4593.55	268.738	1.399405e+002	1.429034e+001	208	28.5	8.176853e+000	0	0	0	0	0	0	137.257	1	1	45.835	28.9667
DATA	976	12	41	0	1	ERCC-00144_60	ERCC-00144_60	4619.12	268.091	1.147294e+001	3.118958e+000	70	31	8.129158e+000	0	0	0	0	0	0	11.2321	1	0	46.1809	29.6053
DATA	977	12	42	0	0	A_42_P759843	XR_086347	4644.07	268.282	5.462018e+003	5.462095e+002	5271.5	31	7.247760e+000	0	0	0	0	0	0	5337.31	1	1	47.2035	30.5676
DATA	978	12	43	0	0	A_43_P14264	NM_053653	4669.99	268.384	8.141692e+002	8.146898e+001	818	32	6.673330e+000	0	0	0	0	0	0	793.875	1	1	48.8603	31.8667
DATA	979	12	44	0	0	A_64_P011223	NM_024353	4694.78	268.56	5.219050e+002	5.227204e+001	628.5	34	8.351278e+000	0	0	0	0	0	0	507.771	1	1	39.8942	31.3793
DATA	980	12	45	0	0	A_42_P701169	NM_001109572	4720.5	268.5	1.663382e+003	1.663639e+002	1667	32	7.784549e+000	0	0	0	0	0	0	1614.29	1	1	49.1849	31.9722
DATA	981	12	46	0	0	A_64_P143307	NM_001014106	4746	268.545	2.509320e+002	2.526408e+001	299.5	30	6.627574e+000	0	0	0	0	0	0	242.886	1	1	65	29.4839
DATA	982	12	47	0	0	A_44_P480636	NM_001005381	4771.2	268.614	2.564572e+002	2.581387e+001	307.5	30	5.910151e+000	0	0	0	0	0	0	247.549	1	1	47.2035	29.6333
DATA	983	12	48	0	0	A_64_P163564	ENSRNOT00000010609	4796.58	268.573	5.887396e+001	6.585253e+000	116	31	8.965314e+000	0	0	0	0	0	0	56.6613	1	1	57.5363	33.6552
DATA	984	12	49	0	0	A_42_P774028	NM_001017447	4822	268.271	2.953398e+003	2.953546e+002	2866	28	7.283211e+000	0	0	0	0	0	0	2833.45	1	1	46.8651	29.6129
DATA	985	12	50	0	0	A_43_P20110	ENSRNOT00000050558	4847.5	268.648	2.265195e+001	3.734552e+000	83	32	8.090178e+000	0	0	0	0	0	0	21.6621	1	1	57.5363	32.0588
DATA	986	12	51	0	0	A_44_P552865	NM_001170399	4873	268.545	4.274876e+002	4.285245e+001	466.5	34	7.508833e+000	0	0	0	0	0	0	407.406	1	1	65	33.5152
DATA	987	12	52	0	0	A_43_P17428	NM_001012189	4898.35	268.5	3.553834e+002	3.566389e+001	398	33	7.301631e+000	0	0	0	0	0	0	337.489	1	1	44.4243	32.7297
DATA	988	12	53	0	0	A_64_P146222	TC633165	4923.79	268.806	2.032450e+004	2.032452e+003	19053	31.5	7.820456e+000	0	0	0	0	0	0	19230.8	1	1	47.5395	32.1471
DATA	989	12	54	0	0	A_64_P054856	NM_001135894	4949.15	268.903	6.300350e+002	6.307547e+001	629.5	30	1.044966e+001	0	0	0	0	0	0	593.874	1	1	46.8651	34.3333
DATA	990	12	55	0	0	A_64_P154982	ENSRNOT00000018118	4974.5	269	1.487982e+004	1.487985e+003	13564.5	33	1.137702e+001	0	0	0	0	0	0	13970.9	1	1	48.5334	35.6452
DATA	991	12	56	0	0	A_42_P726363	NM_031536	5000	269	3.398952e+001	4.557752e+000	92	34	1.260799e+001	0	0	0	0	0	0	31.7834	1	1	54.9904	36.2571
DATA	992	12	57	0	0	A_64_P139685	A_64_P139685	5025.5	269	1.342165e+001	3.331567e+000	72	29	4.861618e+000	0	0	0	0	0	0	12.4979	1	0	54.1152	29.5926
DATA	993	12	58	0	0	A_64_P114104	NM_001034136	5050.73	268.781	8.819107e+003	8.819160e+002	7905	32	8.364727e+000	0	0	0	0	0	0	8176.96	1	1	48.2044	31.7407
DATA	994	12	59	0	0	A_42_P480273	A_42_P480273	5076.13	268.691	6.943739e+003	6.943807e+002	6267	30.5	7.773443e+000	0	0	0	0	0	0	6409.83	1	1	45.835	30.6563
DATA	995	12	60	0	0	A_64_P004344	ENSRNOT00000047696	5101.57	268.853	1.092545e+004	1.092549e+003	10004	31	8.993158e+000	0	0	0	0	0	0	10040.4	1	1	47.2035	32.4242
DATA	996	12	61	0	0	A_42_P723584	NM_001109099	5126.68	268.863	3.824531e+003	3.824657e+002	3443	31	8.633867e+000	0	0	0	1	0	0	3498.86	1	1	48.2044	32.8929
DATA	997	12	62	0	0	A_64_P114813	A_64_P114813	5152.56	268.973	1.084739e+001	3.301673e+000	71	28	7.160636e+000	0	0	0	0	0	0	9.87689	1	0	48.5334	27.3667
DATA	998	12	63	0	0	A_64_P034551	NM_053818	5177.56	268.972	1.088564e+002	1.132752e+001	157	33	7.945378e+000	0	0	0	0	0	0	98.6562	1	1	48.2044	31.0645
DATA	999	12	64	0	0	A_42_P492976	NM_001126099	5203	268.797	2.696002e+002	2.714321e+001	290	34	9.348479e+000	0	0	0	0	0	0	243.157	1	1	46.8651	34.0256
DATA	1000	12	65	0	0	A_64_P141799	NM_001025709	5228.67	268.75	9.195996e+002	9.201436e+001	863.5	29	9.842670e+000	0	0	0	0	0	0	825.327	1	1	47.5395	31.4667
DATA	1001	12	66	0	0	A_44_P337088	NM_133609	5253.79	268.806	7.763634e+002	7.770140e+001	727	31	6.880313e+000	0	0	0	0	0	0	693.399	1	1	47.5395	31.125
DATA	1002	12	67	0	0	A_64_P137961	A_64_P137961	5279.5	269	8.811997e+001	9.373337e+000	140	32	7.848361e+000	0	0	0	0	0	0	78.3117	1	1	54.1152	31.625
DATA	1003	12	68	0	0	A_64_P053822	ENSRNOT00000028268	5304.5	269	8.337037e+001	8.933943e+000	134	32	5.172635e+000	0	0	0	0	0	0	73.7269	1	1	54.1152	32.4483
DATA	1004	12	69	0	0	A_42_P484456	NM_001106601	5330.24	269	4.578845e+003	4.578959e+002	4046	30	1.053371e+001	0	0	0	1	0	0	4028.61	1	1	46.8651	32.3226
DATA	1005	12	70	0	0	A_44_P508632	NM_001107594	5355.45	269.125	1.088667e+001	3.421177e+000	69.5	30.5	8.597406e+000	0	0	0	0	0	0	9.53078	1	0	50.4627	31.3462
DATA	1006	12	71	0	0	A_64_P080598	NM_001047865	5380.63	269.404	4.102039e+001	5.239356e+000	96	29	5.934720e+000	0	0	0	0	0	0	35.7338	1	1	57.8122	30.5357
DATA	1007	12	72	0	0	A_64_P144243	A_64_P144243	5406.3	269.149	2.060501e+001	3.870443e+000	78	32	7.366139e+000	0	0	0	0	0	0	17.8568	1	1	48.5334	31.5
DATA	1008	12	73	0	0	A_44_P479917	NM_030864	5431.74	269.103	2.530281e+001	4.152905e+000	81	31.5	5.513201e+000	0	0	0	0	0	0	21.8169	1	1	49.8279	30.3462
DATA	1009	12	74	0	0	A_44_P974524	NM_001025764	5457	269.455	3.704708e+001	4.967570e+000	92.5	32.5	7.846296e+000	0	0	0	0	0	0	31.786	1	1	55.8519	33.2333
DATA	1010	12	75	0	0	A_42_P522899	NM_021578	5482.63	269	8.220796e+001	8.868329e+000	129	31	6.118493e+000	0	0	0	0	0	0	70.1696	1	1	48.5334	30.6897
DATA	1011	12	76	0	0	A_64_P069892	NM_019201	5507.58	269.427	3.269526e+004	3.269528e+003	27590	29	6.357636e+000	0	0	0	0	0	0	27773.9	1	1	57.5363	29.1667
DATA	1012	12	77	0	0	A_44_P415199	NM_001108748	5533.42	269.427	1.792438e+001	3.807645e+000	72	31	7.022238e+000	0	0	0	0	0	0	15.15	1	1	57.5363	30.6129
DATA	1013	12	78	0	0	A_64_P034610	NM_022622	5558.58	269.427	1.571294e+002	1.607146e+001	192.5	27	6.074253e+000	0	0	0	0	0	0	132.167	1	1	57.5363	28
DATA	1014	12	79	0	0	A_42_P473828	ENSRNOT00000035309	5584.08	269.154	3.615963e+003	3.616122e+002	2977.5	30	8.774352e+000	0	0	0	1	0	0	3026.62	1	1	49.5074	31.4516
DATA	1015	12	80	66	1	DarkCorner	DarkCorner	5609.34	269.403	3.421435e+000	3.408118e+000	55	28.5	7.057369e+000	0	0	0	0	0	0	-3.5468	0	0	49.8279	29.75
DATA	1016	12	81	66	1	DarkCorner	DarkCorner	5634.81	269.152	3.437697e+000	3.424317e+000	52	30	7.007561e+000	0	0	0	0	0	0	-5.7864	0	0	50.4627	29.0345
DATA	1017	12	82	66	1	DarkCorner	DarkCorner	5660.51	269.221	3.453549e+000	3.440107e+000	53	28	7.686286e+000	0	0	0	0	0	0	-4.85258	0	0	46.8651	29.2571
DATA	1018	12	83	66	1	DarkCorner	DarkCorner	5686.01	269.195	3.469054e+000	3.455552e+000	59	30	8.836993e+000	0	0	0	0	0	0	-0.947578	0	0	49.1849	30.2857
DATA	1019	12	84	66	1	DarkCorner	DarkCorner	5711.51	269.571	3.483806e+000	3.478979e+000	58	32.5	9.976280e+000	0	0	0	0	0	0	2.01561	0	0	49.8279	32.6154
DATA	1020	12	85	66	1	DarkCorner	DarkCorner	5736.5	269.5	5.104603e+000	3.521889e+000	62.5	25	6.305989e+000	0	0	0	0	0	0	4.15932	1	0	57.5363	25.6971
DATA	1021	13	1	66	1	DarkCorner	DarkCorner	3590.5	275	4.479293e+000	3.172511e+000	64	25	6.587963e+000	0	0	0	0	0	0	4.04953	1	0	54.1152	25.2327
DATA	1022	13	2	66	1	DarkCorner	DarkCorner	3616.01	275.164	3.135882e+000	3.123677e+000	56	25.5	5.648734e+000	0	0	0	0	0	0	-1.08195	0	0	46.5243	25.9706
DATA	1023	13	3	66	1	DarkCorner	DarkCorner	3641.5	275	3.119501e+000	3.107360e+000	57	27.5	8.532540e+000	0	0	0	0	0	0	-2.62718	0	0	54.1152	29.2857
DATA	1024	13	4	66	1	DarkCorner	DarkCorner	3666.16	274.463	3.104364e+000	3.092281e+000	54	30	6.488204e+000	0	0	0	0	0	0	-3.61334	0	0	45.835	29.575
DATA	1025	13	5	66	1	DarkCorner	DarkCorner	3692.42	275.427	3.087824e+000	3.075806e+000	54	26	5.984995e+000	0	0	0	0	0	0	-5.65292	0	0	65	26.9429
DATA	1026	13	6	0	0	A_64_P029912	NM_001109143	3717.73	275.582	2.634827e+002	2.652547e+001	303.5	30	8.396428e+000	0	0	0	0	0	0	244.413	1	1	50.7771	32
DATA	1027	13	7	0	0	A_42_P574731	NM_012948	3742.68	275.395	4.948658e+003	4.948752e+002	4586	26	6.373204e+000	0	0	0	0	0	0	4611.5	1	1	49.5074	26.6071
DATA	1028	13	8	0	0	A_44_P137448	NM_017043	3768.33	275.371	6.039801e+002	6.047412e+001	617	31	8.282571e+000	0	0	0	1	0	0	565.408	1	1	47.8731	30.6207
DATA	1029	13	9	0	0	A_42_P770614	NM_001013235	3793.58	275.427	4.461434e+004	4.461435e+003	41309	31	6.256032e+000	0	0	0	0	0	0	41947.5	1	1	57.5363	30.931
DATA	1030	13	10	0	0	A_42_P785419	NM_199501	3819.01	275.229	2.459397e+002	2.477715e+001	284	29	9.794117e+000	0	0	0	0	0	0	232.208	1	1	46.8651	32.5161
DATA	1031	13	11	0	0	A_42_P581043	TC622715	3844.44	275.266	1.122913e+004	1.122917e+003	10264	28	9.005877e+000	0	0	0	1	0	0	10645.3	1	1	50.7771	28.9286
DATA	1032	13	12	0	0	A_64_P098532	NM_001029928	3870	275.455	1.759882e+001	3.463770e+000	78.5	34	1.010515e+001	0	0	0	0	0	0	16.7495	1	1	55.8519	32.6471
DATA	1033	13	13	0	0	A_64_P090758	A_64_P090758	3895.42	275.427	1.202960e+003	1.203327e+002	1197	29.5	9.038465e+000	0	0	0	0	0	0	1149.15	1	1	57.5363	30.5769
DATA	1034	13	14	0	0	A_43_P12079	NM_021583	3920.58	275.427	8.342718e+001	8.852925e+000	140	29.5	6.789640e+000	0	0	0	0	0	0	79.9743	1	1	57.5363	29.6071
DATA	1035	13	15	0	0	A_64_P001947	A_64_P001947	3946.33	275.5	2.186501e+001	3.673496e+000	82.5	32	8.410906e+000	0	0	0	0	0	0	21.0316	1	1	57.5363	32.92
DATA	1036	13	16	0	0	A_64_P064461	A_64_P064461	3971.5	275.5	5.398600e+001	6.148510e+000	112	33.5	6.741482e+000	0	0	0	0	0	0	52.0914	1	1	57.5363	32.8125
DATA	1037	13	17	0	0	A_42_P575398	NM_020538	3996.89	275.5	2.945367e+000	2.933904e+000	59	28	7.786003e+000	0	0	0	0	0	0	0.0117996	0	0	56.9804	30.7143
DATA	1038	13	18	0	0	A_42_P482623	NM_199463	4022.26	275.353	2.244178e+003	2.244368e+002	2192.5	26.5	6.110426e+000	0	0	0	0	0	0	2177.91	1	1	51.7088	26.3214
DATA	1039	13	19	0	0	A_42_P738431	NM_019175	4047.63	275.127	2.540247e+003	2.540414e+002	2446	31.5	9.323337e+000	0	0	0	0	0	0	2471.6	1	1	47.5395	30.7308
DATA	1040	13	20	0	0	A_44_P1027780	ENSRNOT00000065815	4073.11	275.5	2.720758e+001	3.984555e+000	88	30	4.050957e+000	0	0	0	0	0	0	26.538	1	1	56.9804	29.4444
DATA	1041	13	21	0	0	A_42_P479802	NM_053679	4098.5	275.5	2.528363e+003	2.528530e+002	2497	30	5.039446e+000	0	0	0	0	0	0	2471.63	1	1	57.5363	30.6296
DATA	1042	13	22	0	0	A_44_P496624	NM_022302	4123.6	275.507	6.768173e+001	7.362802e+000	126	28	5.954301e+000	0	0	0	0	0	0	66.2961	1	1	45.835	28.25
DATA	1043	13	23	0	0	A_42_P700753	FQ212883	4149.19	275.506	2.310339e+003	2.310520e+002	2262	29	7.665311e+000	0	0	0	0	0	0	2267.24	1	1	50.4627	30.9032
DATA	1044	13	24	0	0	A_44_P229299	NM_001100678	4174.73	275.716	4.428822e+002	4.438232e+001	491.5	31	7.109406e+000	0	0	0	0	0	0	435.349	1	1	48.8603	31.3929
DATA	1045	13	25	0	0	A_42_P728472	NM_001007600	4199.75	275.373	7.102076e+003	7.102135e+002	6916	29	3.022622e+000	0	0	0	0	0	0	6990.9	1	1	49.1849	28.8929
DATA	1046	13	26	0	0	A_42_P488904	NM_001108947	4225.44	275.521	1.403407e+004	1.403410e+003	13546	31	5.673159e+000	0	0	0	1	0	0	13832.1	1	1	48.2044	30.4483
DATA	1047	13	27	0	0	A_42_P458494	NM_001034951	4250.42	275.37	9.871318e+001	1.028229e+001	159	31.5	7.531278e+000	0	0	0	0	0	0	97.3912	1	1	48.5334	30.6471
DATA	1048	13	28	0	0	A_64_P100331	ENSRNOT00000048614	4276.51	275.425	2.574640e+001	3.859628e+000	86	30	9.056765e+000	0	0	0	0	0	0	25.4239	1	1	49.1849	31.975
DATA	1049	13	29	0	0	A_64_P113989	NM_181631	4301.62	275.696	1.747874e+004	1.747876e+003	16664	29	5.727710e+000	0	0	0	0	0	0	17271.5	1	1	53.2255	29.16
DATA	1050	13	30	0	0	A_64_P042105	ENSRNOT00000061599	4327	275.545	5.315216e+001	6.041618e+000	114	28	6.192157e+000	0	0	0	0	0	0	52.5448	1	1	55.8519	29.0303
DATA	1051	13	31	0	0	A_64_P044435	NM_001015020	4352.44	275.973	8.825065e+002	8.829734e+001	913	25.5	7.123833e+000	0	0	0	0	0	0	872.691	1	1	48.5334	27.3438
DATA	1052	13	32	0	0	A_64_P149011	NM_031352	4377.66	275.816	5.279242e+003	5.279320e+002	5136	27	8.609822e+000	0	0	0	0	0	0	5220.72	1	1	49.5074	27.9355
DATA	1053	13	33	0	0	A_42_P580844	NM_019296	4403.13	275.377	3.938874e+002	3.949329e+001	439	30	8.448678e+000	0	0	0	0	0	0	389.446	1	1	46.8651	30.6389
DATA	1054	13	34	0	0	A_64_P052972	A_64_P052972	4428.75	275.343	2.072669e+002	2.092482e+001	262	29.5	7.003571e+000	0	0	0	0	0	0	204.859	1	1	46.1809	28.9167
DATA	1055	13	35	0	0	A_44_P454300	NM_001003979	4454	275.545	2.885439e+000	2.883941e+000	63.5	30	6.015750e+000	0	0	0	0	0	0	2.3386	0	0	55.8519	28.4516
DATA	1056	13	36	0	0	A_44_P149743	ENSRNOT00000005476	4479.22	275.191	8.498690e+000	2.999324e+000	69	30	5.837721e+000	0	0	0	0	0	0	8.38936	1	0	46.1809	30.4571
DATA	1057	13	37	0	0	A_42_P841017	NM_173309	4504.42	275.878	6.719483e+003	6.719545e+002	6519	28	6.457134e+000	0	0	0	0	0	0	6627.6	1	1	48.5334	29.1379
DATA	1058	13	38	0	0	A_44_P206844	NM_013074	4530.42	275.573	1.873841e+002	1.895877e+001	242	30	1.196702e+001	0	0	0	0	0	0	184.606	1	1	57.5363	32.375
DATA	1059	13	39	0	0	A_64_P073400	NM_001000705	4555.59	276.167	1.459948e+002	1.488192e+001	205.5	27	6.895692e+000	0	0	0	0	0	0	143.657	1	1	45.835	28.0333
DATA	1060	13	40	0	0	A_64_P066676	A_64_P066676	4581.21	276.088	2.442353e+001	3.783766e+000	84.5	31	8.808476e+000	0	0	0	0	0	0	23.9963	1	1	46.5243	32.4516
DATA	1061	13	41	0	0	A_44_P386965	NM_001134594	4606.34	275.932	8.840814e+000	3.026758e+000	69	31	6.558662e+000	0	0	0	0	0	0	8.67171	1	0	48.8603	29.1176
DATA	1062	13	42	0	0	A_64_P095895	NM_019338	4631.5	276	7.019336e+001	7.594816e+000	128	31	5.896544e+000	0	0	0	0	0	0	68.7259	1	1	54.1152	30.3333
DATA	1063	13	43	1028	1	(+)E1A_r60_a22	E1A_r60_a22	4657.4	275.643	1.252671e+002	1.285940e+001	181	32	6.466844e+000	0	0	0	0	0	0	122.39	1	1	47.2035	32.4848
DATA	1064	13	44	0	0	A_42_P541625	NM_001126090	4682.37	275.873	2.778645e+004	2.778647e+003	26158	28	8.159861e+000	0	0	0	0	0	0	27090.6	1	1	47.5395	29.8
DATA	1065	13	45	0	0	A_64_P033895	NM_001126084	4707.79	275.806	3.664439e+002	3.676049e+001	419	34	7.939335e+000	0	0	0	0	0	0	356.418	1	1	47.5395	32.4595
DATA	1066	13	46	0	0	A_64_P012546	NM_022300	4733.5	276	7.193081e+004	7.193081e+003	68883	32	7.722280e+000	0	0	0	0	0	0	69785.3	1	1	54.1152	32.3143
DATA	1067	13	47	0	0	A_42_P495598	NM_001014026	4758.5	276	2.945944e+000	2.944848e+000	63	32	8.111011e+000	0	0	0	0	0	0	2.38913	0	0	54.1152	33.0667
DATA	1068	13	48	0	0	A_42_P483463	NM_001130999	4783.91	276.104	5.928792e+003	5.928865e+002	5768	30	8.544115e+000	0	0	0	0	0	0	5720.38	1	1	46.8651	32.2424
DATA	1069	13	49	0	0	A_42_P575104	NM_153737	4809.63	275.873	6.947701e+001	7.548809e+000	127.5	30	7.915510e+000	0	0	0	0	0	0	66.8281	1	1	47.5395	30.9697
DATA	1070	13	50	0	0	A_42_P461726	NM_133549	4835.06	275.971	3.784691e+001	4.805529e+000	95.5	32	7.453009e+000	0	0	0	0	0	0	36.2891	1	1	46.8651	30.7879
DATA	1071	13	51	0	0	A_64_P098688	A_64_P098688	4860.5	276	9.276750e+004	9.276750e+003	88791	32.5	7.506702e+000	0	0	0	0	0	0	88654.2	1	1	54.1152	32.8333
DATA	1072	13	52	0	0	A_64_P105797	A_64_P105797	4885.5	276	4.497759e+001	5.396095e+000	104	35	7.153750e+000	0	0	0	0	0	0	42.8371	1	1	54.1152	33.3636
DATA	1073	13	53	0	0	A_42_P545943	NM_019291	4910.93	276.2	6.180711e+003	6.180784e+002	5692.5	30	6.887497e+000	0	0	0	0	0	0	5865.57	1	1	46.8651	30.3235
DATA	1074	13	54	0	0	A_44_P520045	NM_001001371	4936.59	276.042	1.373689e+002	1.406137e+001	191	33	8.561228e+000	0	0	0	0	0	0	129.871	1	1	48.2044	34.8065
DATA	1075	13	55	0	0	A_44_P306964	NM_001012184	4961.76	276.114	3.902957e+001	4.931746e+000	94	28	7.610597e+000	0	0	0	0	0	0	36.7587	1	1	46.5243	29.7241
DATA	1076	13	56	0	0	A_44_P156043	NM_001039012	4986.91	276.104	1.757721e+003	1.757981e+002	1719	33	9.318949e+000	0	0	0	0	0	0	1648.93	1	1	46.8651	34.303
DATA	1077	13	57	0	0	A_64_P054686	TC585752	5012.5	276	2.515785e+004	2.515787e+003	23988.5	29.5	1.176326e+001	0	0	0	0	0	0	23503.1	1	1	54.1152	33.6786
DATA	1078	13	58	0	0	A_42_P575104	NM_153737	5038.09	276.065	7.109005e+001	7.736527e+000	122	32	7.807771e+000	0	0	0	0	0	0	66.1336	1	1	54.4085	31.8065
DATA	1079	13	59	0	0	A_64_P142194	NM_053426	5063.37	275.735	1.158501e+003	1.158907e+002	1114	30	7.692503e+000	0	0	0	0	0	0	1073.05	1	1	46.5243	29.2857
DATA	1080	13	60	0	0	A_64_P043314	A_64_P043314	5088.58	276.427	6.466290e+001	7.161758e+000	121	30	5.767669e+000	0	0	0	0	0	0	59.6384	1	1	57.5363	29.8621
DATA	1081	13	61	0	0	A_44_P684315	NM_001109104	5114.42	276.427	4.971586e+004	4.971587e+003	44691	32	8.100000e+000	0	0	0	0	0	0	45643	1	1	57.5363	33.88
DATA	1082	13	62	0	0	A_64_P142620	NM_201417	5139.58	276.158	6.114709e+001	6.858803e+000	116.5	31	7.718471e+000	0	0	0	0	0	0	55.8803	1	1	49.5074	31.3143
DATA	1083	13	63	0	0	A_42_P568419	NM_001011894	5164.93	276.268	2.034673e+003	2.034913e+002	1858	29	7.663768e+000	0	0	0	0	0	0	1850.81	1	1	47.5395	29
DATA	1084	13	64	0	0	A_42_P519868	NM_053906	5190.32	276.342	6.254955e+001	6.997183e+000	117	33	9.825074e+000	0	0	0	0	0	0	56.6289	1	1	49.1849	33.7941
DATA	1085	13	65	0	0	A_43_P12346	NM_022943	5216	275.969	8.804807e+001	9.351909e+000	140	28.5	9.392457e+000	0	0	0	0	0	0	79.3218	1	1	46.8651	31.6944
DATA	1087	13	67	0	0	A_44_P556989	NM_012610	5266.58	276.427	7.374050e+001	8.031421e+000	124.5	30.5	6.990059e+000	0	0	0	0	0	0	65.7944	1	1	65	30.9667
DATA	1088	13	68	0	0	A_64_P113079	XM_218149	5292.01	276.467	5.030348e+000	3.237426e+000	64	33	5.570315e+000	0	0	0	0	0	0	4.46613	1	0	48.5334	32.1818
DATA	1089	13	69	0	0	A_64_P003937	NM_173111	5317	276.271	5.007708e+003	5.007811e+002	4242	31	7.166733e+000	0	0	0	0	0	0	4424.1	1	1	46.8651	32.1724
DATA	1090	13	70	0	0	A_42_P771337	NM_001012015	5343.18	276.03	8.546915e+001	9.137153e+000	136.5	26	6.260132e+000	0	0	0	0	0	0	75.1157	1	1	46.1809	27.4516
DATA	1091	13	71	0	0	A_44_P401035	A_44_P401035	5368.33	276.5	7.058811e+001	7.769617e+000	124.5	28.5	7.938050e+000	0	0	0	0	0	0	61.7354	1	1	57.5363	29.7667
DATA	1092	13	72	0	0	A_42_P536292	NM_033359	5393.4	276.562	1.032547e+003	1.033062e+002	941	31	9.795923e+000	0	0	0	0	0	0	898.591	1	1	48.2044	32.963
DATA	1093	13	73	0	0	A_44_P128564	NM_001109121	5418.89	276.5	1.348954e+002	1.388240e+001	175	31	4.263741e+000	0	0	0	0	0	0	116.802	1	1	56.9804	30.4444
DATA	1094	13	74	0	0	A_64_P069957	NM_173315	5444.5	276.5	1.986109e+001	3.848032e+000	76	32.5	8.049181e+000	0	0	0	0	0	0	17.1104	1	1	65	32.7188
DATA	1095	13	75	0	0	A_44_P538691	NM_031772	5469.99	276.384	1.276570e+002	1.318847e+001	167.5	32	6.999846e+000	0	0	0	0	0	0	109.424	1	1	48.8603	31.7419
DATA	1096	13	76	0	0	A_44_P499231	NM_001034148	5495.33	276.5	3.340116e+002	3.356664e+001	334	28	5.412332e+000	0	0	0	0	0	0	284.897	1	1	57.5363	28.72
DATA	1097	13	77	0	0	A_64_P121489	XM_001065883	5520.5	276.5	1.571650e+001	3.695993e+000	70	30	7.282162e+000	0	0	0	0	0	0	13.3402	1	0	57.5363	28.7333
DATA	1098	13	78	0	0	A_42_P507072	FQ213070	5546	276.5	4.915834e+003	4.915949e+002	4079	27	6.482297e+000	0	0	0	0	0	0	4152.18	1	1	51.0895	27.4571
DATA	1099	13	79	0	0	A_64_P120075	ENSRNOT00000027841	5571.48	276.384	3.163037e+002	3.181024e+001	314	27.5	6.088995e+000	0	0	0	0	0	0	265.871	1	1	48.5334	27.6
DATA	1100	13	80	0	0	A_44_P1007362	NM_138864	5596.52	276.615	4.573956e+002	4.586528e+001	441.5	29.5	5.724264e+000	0	0	0	0	0	0	382.695	1	1	45.4864	29.2143
DATA	1101	13	81	66	1	DarkCorner	DarkCorner	5622.11	276.5	3.423049e+000	3.409726e+000	52.5	29	6.515490e+000	0	0	0	0	0	0	-6.36117	0	0	65	29.75
DATA	1102	13	82	66	1	DarkCorner	DarkCorner	5648.06	276.217	3.439340e+000	3.425954e+000	56	29	6.590080e+000	0	0	0	0	0	0	-5.87755	0	0	46.5243	28.6923
DATA	1103	13	83	66	1	DarkCorner	DarkCorner	5673.27	276.613	3.454261e+000	3.440816e+000	57	30	8.196424e+000	0	0	0	0	0	0	-3.29776	0	0	51.0895	30.8158
DATA	1104	13	84	66	1	DarkCorner	DarkCorner	5698.74	276.514	3.469467e+000	3.455964e+000	58	30	8.617304e+000	0	0	0	0	0	0	-1.05638	0	0	47.2035	30.4643
DATA	1105	13	85	66	1	DarkCorner	DarkCorner	5723.69	276.708	3.483715e+000	3.482829e+000	60.5	24	5.052664e+000	0	0	0	0	0	0	2.42879	0	0	48.2044	25
DATA	1106	14	1	66	1	DarkCorner	DarkCorner	3603.42	282.573	3.139194e+000	3.126977e+000	57	25	5.852866e+000	0	0	0	0	0	0	-1.82517	0	0	57.5363	25.4737
DATA	1107	14	2	66	1	DarkCorner	DarkCorner	3628.58	282.573	3.122826e+000	3.110672e+000	57	26.5	6.851797e+000	0	0	0	0	0	0	-1.70334	0	0	57.5363	27.8667
DATA	1108	14	3	66	1	DarkCorner	DarkCorner	3654.23	282.253	3.106844e+000	3.094752e+000	53	27.5	6.300726e+000	0	0	0	0	0	0	-5.15255	0	0	48.8603	27.2368
DATA	1109	14	4	66	1	DarkCorner	DarkCorner	3679.74	282.549	3.091063e+000	3.079032e+000	57	27.5	6.911604e+000	0	0	0	0	0	0	-4.5118	0	0	51.4001	27.5
DATA	1110	14	5	66	1	DarkCorner	DarkCorner	3704.94	282.286	3.076327e+000	3.064354e+000	53	27.5	8.869125e+000	0	0	0	0	0	0	-8.04784	0	0	39.4933	28.9286
DATA	1111	14	6	0	0	A_64_P151415	NM_001191684	3730.42	282.573	2.803640e+002	2.820178e+001	314	27.5	6.292579e+000	0	0	0	0	0	0	261.03	1	1	57.5363	28.3
DATA	1112	14	7	0	0	A_42_P475623	NM_053394	3755.63	282.64	9.043064e+002	9.048158e+001	850.5	28	7.851180e+000	0	0	0	0	0	0	845.786	1	1	48.8603	30.2222
DATA	1113	14	8	0	0	A_44_P123636	ENSRNOT00000023689	3781.05	282.523	3.034326e+000	3.031402e+000	61.5	30.5	7.906540e+000	0	0	0	0	0	0	2.17875	0	0	55.8519	31.8235
DATA	1114	14	9	0	0	A_64_P135207	ENSRNOT00000043866	3806.5	282.5	2.434072e+002	2.452608e+001	289	32	9.266605e+000	0	0	0	0	0	0	229.637	1	1	49.1849	32.4688
DATA	1115	14	10	0	0	A_42_P516693	NM_001107330	3831.58	282.573	1.179362e+001	3.221127e+000	71	27	8.629911e+000	0	0	0	0	0	0	11.1717	1	0	57.5363	28.7586
DATA	1116	14	11	0	0	A_64_P125447	NM_001109231	3857.42	282.573	1.117835e+002	1.157016e+001	165	28	9.553179e+000	0	0	0	0	0	0	106.313	1	1	57.5363	29.8214
DATA	1117	14	12	0	0	A_42_P701756	NM_001107646	3882.63	282.477	3.035746e+003	3.035891e+002	2898.5	32.5	8.543398e+000	0	0	0	0	0	0	2897.94	1	1	52.9257	30.9
DATA	1118	14	13	0	0	A_44_P344181	NM_017204	3907.74	282.778	8.729115e+002	8.734145e+001	879	28	8.220908e+000	0	0	0	0	0	0	836.29	1	1	47.5395	30.4
DATA	1119	14	14	0	0	A_64_P035330	ENSRNOT00000066415	3933.43	282.785	4.750763e+002	4.759935e+001	519	29	5.419322e+000	0	0	0	0	0	0	456.72	1	1	50.4627	29.5357
DATA	1120	14	15	0	0	A_42_P837533	NM_001134546	3958.65	282.864	6.883141e+003	6.883204e+002	6617	32	7.043437e+000	0	0	0	0	0	0	6638.56	1	1	50.4627	31.88
DATA	1121	14	16	0	0	A_42_P744291	NM_001025729	3984.39	282.931	1.931132e+003	1.931355e+002	1893	29.5	7.866706e+000	0	0	0	0	0	0	1868.3	1	1	53.8203	31.3333
DATA	1122	14	17	0	0	A_44_P149267	NM_001013099	4009.78	282.667	1.731310e+001	3.400357e+000	78	26	4.084925e+000	0	0	0	0	0	0	16.7972	1	1	46.8651	25.9259
DATA	1123	14	18	0	0	A_64_P002546	NM_144741	4035.06	282.714	4.093108e+000	2.947340e+000	64	24.5	6.866879e+000	0	0	0	0	0	0	3.98178	1	0	46.5243	25.8667
DATA	1124	14	19	0	0	A_42_P808236	NM_001107189	4060.23	282.884	8.080981e+001	8.589476e+000	137	30	5.026806e+000	0	0	0	0	0	0	78.8084	1	1	46.5243	28.7826
DATA	1125	14	20	0	0	A_44_P425848	NM_001108747	4085.67	282.667	4.967636e+002	4.976122e+001	541	30	4.612630e+000	0	0	0	0	0	0	485.565	1	1	46.8651	30.2593
DATA	1126	14	21	0	0	A_43_P17405	TC612613	4111.23	283.07	1.374321e+002	1.404555e+001	193.5	30	4.485060e+000	0	0	0	0	0	0	134.627	1	1	46.8651	29.4828
DATA	1127	14	22	0	0	A_64_P022402	NM_001142304	4136.73	282.945	1.187712e+001	3.127335e+000	70	28.5	5.782660e+000	0	0	0	0	0	0	11.657	1	0	48.5334	28.5714
DATA	1128	14	23	0	0	A_44_P1019726	ENSRNOT00000025138	4162.07	283	2.144970e+002	2.164325e+001	270	30	6.752538e+000	0	0	0	0	0	0	210.885	1	1	46.8651	30.125
DATA	1129	14	24	0	0	A_44_P128186	NM_053305	4187.23	283.116	1.371958e+002	1.401934e+001	198	30	4.667976e+000	0	0	0	0	0	0	135.092	1	1	46.5243	29.96
DATA	1130	14	25	0	0	A_44_P203665	NM_001105725	4212.5	283	9.022724e+001	9.471165e+000	150	29	4.743254e+000	0	0	0	0	0	0	88.9604	1	1	54.1152	29.5385
DATA	1131	14	26	0	0	A_42_P688802	DV723748	4237.87	282.9	4.002969e+003	4.003073e+002	3991	30.5	7.063668e+000	0	0	0	0	0	0	3951.21	1	1	46.8651	29.6333
DATA	1132	14	27	0	0	A_64_P129943	NM_001105712	4263.43	282.769	3.205532e+002	3.218389e+001	380	31	8.271773e+000	0	0	0	0	0	0	316.703	1	1	45.4864	30.8222
DATA	1133	14	28	0	0	A_64_P017577	NM_001106982	4289	283	1.833914e+001	3.407318e+000	78	31	9.708992e+000	0	0	0	0	0	0	18.1329	1	1	54.9904	33.2581
DATA	1134	14	29	0	0	A_44_P235926	NM_024138	4314.16	283.118	2.517879e+002	2.534184e+001	309	28	5.086351e+000	0	0	0	0	0	0	249.095	1	1	46.5243	28.5
DATA	1135	14	30	0	0	A_42_P611638	NM_001034137	4339.5	283	1.000178e+003	1.000590e+002	1020	30	8.092973e+000	0	0	0	0	0	0	989.811	1	1	48.5334	30.6061
DATA	1136	14	31	0	0	A_42_P654878	NM_001107919	4364.86	283.211	1.817775e+003	1.818001e+002	1816.5	29	8.312795e+000	0	0	0	0	0	0	1799.26	1	1	47.2035	28.4444
DATA	1137	14	32	0	0	A_64_P017464	NM_001135687	4390.5	283	2.880030e+000	2.871381e+000	62	28.5	8.655467e+000	0	0	0	0	0	0	1.19975	0	0	54.1152	29.8529
DATA	1138	14	33	0	0	A_64_P152873	NM_001207022	4415.91	283.065	5.601881e+001	6.294047e+000	117	30	8.067843e+000	0	0	0	0	0	0	55.4314	1	1	65	30.5135
DATA	1139	14	34	0	0	A_64_P013243	A_64_P013243	4441.24	283	8.537760e+003	8.537808e+002	8326	29	6.715573e+000	0	0	0	0	0	0	8444.51	1	1	46.8651	29.0323
DATA	1140	14	35	0	0	A_64_P029720	NM_001109405	4466.69	282.971	2.490096e+002	2.506610e+001	304	31	7.271794e+000	0	0	0	0	0	0	246.134	1	1	46.1809	29.3429
DATA	1141	14	36	0	0	A_43_P13459	NM_001107548	4492.25	282.797	1.756576e+002	1.779948e+001	235	28	6.088010e+000	0	0	0	0	0	0	173.483	1	1	45.1352	27.6286
DATA	1142	14	37	0	0	A_64_P053923	NM_001107323	4517.42	282.901	1.604705e+003	1.604963e+002	1596	30	8.686919e+000	0	0	0	0	0	0	1583.27	1	1	47.8731	30.8529
DATA	1143	14	38	0	0	A_44_P1005199	ENSRNOT00000032786	4542.81	283.43	4.485847e+001	5.331366e+000	107	28	6.142422e+000	0	0	0	0	0	0	44.2094	1	1	58.0869	26.963
DATA	1144	14	39	0	0	A_44_P104821	NM_024369	4568.07	283.133	1.754454e+002	1.778018e+001	238	28	9.445258e+000	0	0	0	0	0	0	172.663	1	1	44.4243	30.2903
DATA	1145	14	40	0	0	A_64_P009956	A_64_P009956	4593.77	283.394	6.054311e+002	6.061203e+001	666.5	31.5	8.043203e+000	0	0	0	0	0	0	594.907	1	1	47.5395	32.7857
DATA	1146	14	41	0	0	A_64_P060947	NM_203334	4619	283.455	3.030041e+001	4.190460e+000	89	30	7.739970e+000	0	0	0	0	0	0	29.7223	1	1	65	28.4167
DATA	1147	14	42	0	0	A_64_P103419	NM_001106291	4644.64	282.682	1.152191e+001	3.120994e+000	71	28	6.085868e+000	0	0	0	0	0	0	11.2791	1	0	45.835	28.4103
DATA	1148	14	43	0	0	A_44_P220827	NM_001012051	4669.71	282.833	9.204238e+002	9.208826e+001	936	32	7.870899e+000	0	0	0	0	0	0	899.175	1	1	45.835	31.1071
DATA	1149	14	44	0	1	ETG07_105829	ETG07_105829	4695.42	283.427	4.935321e+000	2.954475e+000	66	34	8.084072e+000	0	0	0	0	0	0	4.81068	1	0	57.5363	31.931
DATA	1150	14	45	0	0	A_42_P719478	NM_001191779	4720.58	283.427	2.199461e+001	3.655696e+000	83.5	33.5	8.241725e+000	0	0	0	0	0	0	21.3874	1	1	57.5363	33.7941
DATA	1151	14	46	0	0	A_42_P462257	NM_001109481	4746.19	283.357	1.727192e+004	1.727194e+003	16412	32	6.386646e+000	0	0	0	0	0	0	16750.8	1	1	51.4001	33.4516
DATA	1152	14	47	0	0	A_44_P105634	NM_001007658	4771.43	283.391	1.624854e+002	1.651162e+001	219.5	30	6.503134e+000	0	0	0	0	0	0	157.151	1	1	47.5395	30.9429
DATA	1153	14	48	0	0	A_64_P100594	NM_001000360	4796.67	283.5	6.651667e+001	7.274163e+000	128	31	6.707779e+000	0	0	0	0	0	0	64.1472	1	1	57.5363	31.0741
DATA	1154	14	49	0	0	A_64_P004266	A_64_P004266	4822.56	283.274	1.834392e+001	3.476912e+000	78	29	6.859049e+000	0	0	0	0	0	0	17.6345	1	1	43.3362	29.1892
DATA	1155	14	50	0	0	A_44_P156343	NM_001000102	4847.5	283.5	9.885865e+000	3.123486e+000	68	34	6.820739e+000	0	0	0	0	0	0	9.47374	1	0	57.5363	33.3214
DATA	1156	14	51	0	0	A_42_P504358	NM_001108674	4873	283.455	5.005045e+002	5.013867e+001	541	35	6.084088e+000	0	0	0	0	0	0	478.015	1	1	65	34.625
DATA	1157	14	52	0	0	A_44_P281468	NM_001127556	4899.1	283.145	1.544485e+001	3.359903e+000	75	31	7.081401e+000	0	0	0	0	0	0	14.697	1	1	46.8651	31.7097
DATA	1158	14	53	0	0	A_43_P12785	NM_053364	4923.67	283.5	3.430051e+000	3.013855e+000	62	33	8.439167e+000	0	0	0	0	0	0	3.25263	1	0	65	33.2333
DATA	1159	14	54	0	0	A_64_P053297	NM_001107278	4949.05	283.608	3.395599e+003	3.395732e+002	3225.5	27	4.856267e+000	0	0	0	0	0	0	3207.88	1	1	49.1849	27.2
DATA	1160	14	55	0	0	A_64_P062986	NM_001001018	4974.18	283.831	1.846661e+001	3.537353e+000	77	30	5.034251e+000	0	0	0	0	0	0	17.3791	1	1	47.2035	29.9667
DATA	1161	14	56	0	0	A_44_P529226	NM_023091	4999.95	283.523	3.041378e+000	3.033535e+000	60	30	6.736973e+000	0	0	0	0	0	0	1.45849	0	0	65	31.6471
DATA	1162	14	57	0	0	A_42_P559737	NM_020074	5025.32	283.466	1.754473e+003	1.754737e+002	1669	28	6.467759e+000	0	0	0	0	0	0	1637.56	1	1	48.5334	29.2963
DATA	1163	14	58	0	0	A_44_P1017458	NM_199402	5050.58	283.573	1.445218e+002	1.477152e+001	196.5	31.5	8.072943e+000	0	0	0	0	0	0	134.326	1	1	57.5363	32
DATA	1164	14	59	0	0	A_44_P407750	NM_001127680	5075.89	283.352	1.391250e+003	1.391589e+002	1324	29.5	6.021383e+000	0	0	0	0	0	0	1287.47	1	1	47.8731	28.4688
DATA	1165	14	60	0	0	A_64_P033872	NM_001037353	5101.5	283.5	3.364246e+001	4.562519e+000	92	31	7.786327e+000	0	0	0	0	0	0	30.9947	1	1	57.5363	32.5758
DATA	1166	14	61	0	0	A_42_P472699	NM_001108061	5127	283.545	8.132922e+001	8.702265e+000	133	33	6.825632e+000	0	0	0	0	0	0	74.5893	1	1	55.8519	33.4516
DATA	1167	14	62	0	0	A_44_P201215	ENSRNOT00000014231	5152.43	283.536	1.952744e+001	3.672474e+000	78	30.5	7.371958e+000	0	0	0	0	0	0	17.8267	1	1	46.8651	31.0938
DATA	1168	14	63	0	0	A_64_P129910	NM_001107648	5177.43	283.843	6.011330e+002	6.019445e+001	609	33	9.759887e+000	0	0	0	0	0	0	546.286	1	1	47.5395	34.1538
DATA	1169	14	64	0	0	A_64_P027927	NM_022255	5203.19	283.57	9.069835e+001	9.597898e+000	143	32	9.439502e+000	0	0	0	0	0	0	82.0232	1	1	58.0869	33.3143
DATA	1170	14	65	0	0	A_64_P101623	A_64_P101623	5228.5	283.648	2.815120e+004	2.815122e+003	25348	28	6.228101e+000	0	0	0	0	0	0	25337.3	1	1	57.5363	28.4516
DATA	1171	14	66	0	0	A_42_P645110	NM_001029919	5253.91	283.614	3.133900e+004	3.133902e+003	27836.5	31	8.245168e+000	0	0	0	0	0	0	28069.5	1	1	57.259	31.871
DATA	1172	14	67	0	0	A_64_P017781	NM_001010956	5279.2	283.348	2.300668e+002	2.322621e+001	258	33	8.174934e+000	0	0	0	0	0	0	205.051	1	1	45.4864	33.7273
DATA	1173	14	68	0	0	A_64_P057106	NM_001004087	5304.82	283.646	1.405051e+002	1.441064e+001	179	32	6.705239e+000	0	0	0	0	0	0	124.613	1	1	45.4864	31.9091
DATA	1174	14	69	0	0	A_44_P187005	NM_022238	5330.09	283.614	1.087558e+002	1.134151e+001	155	28	5.190865e+000	0	0	0	0	0	0	95.9783	1	1	57.259	27.8485
DATA	1175	14	70	0	0	A_42_P779933	NM_017117	5355.47	283.905	3.090424e+001	4.472672e+000	88.5	26	6.312813e+000	0	0	0	0	0	0	27.1395	1	1	48.5334	27.5806
DATA	1176	14	71	0	0	A_42_P555701	NM_001107554	5380.81	284	1.405993e+004	1.405997e+003	12229	29	9.573119e+000	0	0	0	1	0	0	12286	1	1	49.1849	30.7308
DATA	1177	14	72	0	0	A_42_P705302	NM_001107361	5406	283.797	7.048314e+003	7.048390e+002	5954	30.5	5.272846e+000	0	0	0	0	0	0	6128.33	1	1	46.8651	29.6071
DATA	1178	14	73	0	0	A_64_P015435	A_64_P015435	5431.5	284	3.810338e+004	3.810339e+003	33229	33	4.576354e+000	0	0	0	0	0	0	32965.8	1	1	54.1152	33.4074
DATA	1179	14	74	0	0	A_64_P036217	NM_001000569	5457.08	283.758	6.132832e+001	6.963627e+000	111.5	32	7.076926e+000	0	0	0	0	0	0	52.7914	1	1	44.7812	32.9118
DATA	1180	14	75	0	0	A_44_P543511	NM_001024749	5482.5	283.735	1.932481e+003	1.932765e+002	1757	29	6.095395e+000	0	0	0	0	0	0	1655.25	1	1	46.5243	29.6667
DATA	1181	14	76	0	0	A_42_P759043	NM_001134509	5507.6	283.643	6.836957e+002	6.845067e+001	630	30	6.671582e+000	0	0	0	1	0	0	582.767	1	1	47.2035	29.52
DATA	1182	14	77	0	0	A_42_P679982	NM_001107835	5533.21	283.806	4.814578e+003	4.814695e+002	3998	28	7.432952e+000	0	0	0	0	0	0	4083.91	1	1	47.5395	28.0345
DATA	1183	14	78	0	0	A_43_P18064	NM_001106904	5558.61	284.08	1.620346e+001	3.733284e+000	73	28	8.053561e+000	0	0	0	0	0	0	13.6794	1	0	49.1849	28.8788
DATA	1184	14	79	0	0	A_64_P092143	NM_001129879	5583.84	283.897	3.996835e+003	3.996978e+002	3338.5	28.5	7.485200e+000	0	0	0	0	0	0	3358.22	1	1	46.5243	29.3125
DATA	1185	14	80	0	0	A_64_P102886	A_64_P102886	5609.71	283.929	1.874205e+001	3.878345e+000	75	30	8.076075e+000	0	0	0	0	0	0	15.6729	1	1	46.8651	30.8667
DATA	1186	14	81	66	1	DarkCorner	DarkCorner	5634.5	284	3.423894e+000	3.410568e+000	55	28	7.346633e+000	0	0	0	0	0	0	-4.11165	0	0	54.1152	29.359
DATA	1187	14	82	66	1	DarkCorner	DarkCorner	5660.2	283.827	3.439613e+000	3.426226e+000	57	30	8.257210e+000	0	0	0	0	0	0	-2.74722	0	0	49.8279	30.3714
DATA	1188	14	83	66	1	DarkCorner	DarkCorner	5685.72	283.957	3.454635e+000	3.441189e+000	58	30	8.044546e+000	0	0	0	0	0	0	-0.756193	0	0	46.1809	29.7027
DATA	1189	14	84	66	1	DarkCorner	DarkCorner	5711.14	284.013	3.469302e+000	3.455799e+000	58	24	6.077955e+000	0	0	0	0	0	0	-0.780269	0	0	49.1849	26.3077
DATA	1190	14	85	66	1	DarkCorner	DarkCorner	5736.63	284.048	3.483627e+000	3.480262e+000	62	26	6.514919e+000	0	0	0	0	0	0	2.17804	0	0	49.8279	26.3573
DATA	1191	15	1	66	1	DarkCorner	DarkCorner	3590.49	289.922	3.142776e+000	3.140260e+000	60	25	6.377270e+000	0	0	0	0	0	0	2.23878	0	0	50.1463	24.8992
DATA	1192	15	2	66	1	DarkCorner	DarkCorner	3616	289.545	3.126348e+000	3.114180e+000	54	25	5.006874e+000	0	0	0	0	0	0	-3.96218	0	0	55.8519	25.4286
DATA	1193	15	3	66	1	DarkCorner	DarkCorner	3641.5	289.648	3.110089e+000	3.097984e+000	55	26	4.946386e+000	0	0	0	0	0	0	-4.83977	0	0	57.5363	26.7188
DATA	1194	15	4	66	1	DarkCorner	DarkCorner	3666.96	289.716	3.094376e+000	3.082333e+000	54	28	6.717007e+000	0	0	0	0	0	0	-5.6876	0	0	48.8603	28.5333
DATA	1195	15	5	66	1	DarkCorner	DarkCorner	3692.39	289.931	3.079097e+000	3.067113e+000	53	27	6.588374e+000	0	0	0	0	0	0	-6.77572	0	0	65	27.36
DATA	1196	15	6	0	0	A_44_P451392	NM_001108023	3717.49	290.143	3.186154e+002	3.200743e+001	358	27.5	7.259177e+000	0	0	0	0	0	0	296.362	1	1	49.1849	29
DATA	1197	15	7	0	0	A_64_P012661	ENSRNOT00000010298	3742.76	290	1.352477e+003	1.352818e+002	1300	26.5	6.211225e+000	0	0	0	0	0	0	1263.77	1	1	46.8651	27.2
DATA	1198	15	8	0	0	A_42_P546058	NM_053670	3768.15	290.108	3.746801e+003	3.746923e+002	3456.5	31	9.486213e+000	0	0	0	1	0	0	3516.77	1	1	47.8731	32.2
DATA	1199	15	9	0	0	A_42_P695401	NM_031530	3793.43	289.957	1.147921e+002	1.186785e+001	170	28	7.253672e+000	0	0	0	1	0	0	108.205	1	1	47.2035	28.4828
DATA	1200	15	10	0	0	A_44_P192193	A_44_P192193	3818.91	290.104	1.121442e+002	1.160867e+001	165	28	8.854249e+000	0	0	0	0	0	0	106.153	1	1	46.8651	30.0909
DATA	1201	15	11	0	0	A_42_P473886	NM_001165922	3844.49	290.072	3.038925e+002	3.053576e+001	346	27	9.790384e+000	0	0	0	0	0	0	288.811	1	1	47.8731	28.5806
DATA	1202	15	12	0	0	A_42_P576953	NM_138882	3869.96	289.841	5.897843e+002	5.905349e+001	618	30.5	9.333445e+000	0	0	0	1	0	0	562.644	1	1	46.8651	30.9118
DATA	1203	15	13	0	0	A_44_P260227	ENSRNOT00000036745	3895.5	290	4.343752e+001	5.259438e+000	102	28	9.786385e+000	0	0	0	0	0	0	41.592	1	1	54.1152	31.24
DATA	1204	15	14	0	0	A_44_P276435	NM_053853	3920.55	290.171	1.550347e+002	1.578261e+001	208	28.5	8.158148e+000	0	0	0	1	0	0	148.962	1	1	49.1849	29.3462
DATA	1205	15	15	0	0	A_43_P19066	NM_001017494	3946.39	290.069	1.580285e+002	1.607497e+001	211	29	6.792614e+000	0	0	0	0	0	0	152.346	1	1	53.8203	29.7037
DATA	1206	15	16	0	0	A_64_P113200	ENSRNOT00000061930	3971.45	290.056	3.350578e+001	4.455107e+000	92	31.5	7.060684e+000	0	0	0	0	0	0	32.4005	1	1	48.2044	31.875
DATA	1207	15	17	0	0	A_42_P480108	NM_001007637	3996.76	289.977	1.471999e+003	1.472290e+002	1450	27	8.976616e+000	0	0	0	0	0	0	1427.6	1	1	51.0895	30.4688
DATA	1209	15	19	0	0	A_44_P420046	NM_021669	4047.56	289.912	1.170953e+002	1.206622e+001	177	29	4.869306e+000	0	0	0	0	0	0	114.169	1	1	46.8651	28.1667
DATA	1210	15	20	0	0	A_64_P077021	A_64_P077021	4073.24	290.014	2.389333e+001	3.761476e+000	84	29	4.590074e+000	0	0	0	0	0	0	23.3527	1	1	47.2035	29.4286
DATA	1211	15	21	0	0	A_44_P292558	NM_213559	4098.5	290	1.836296e+002	1.859036e+001	241.5	30	5.915476e+000	0	0	0	0	0	0	179.866	1	1	54.1152	28.9167
DATA	1212	15	22	0	0	A_42_P471653	NM_001031654	4123.91	290.065	9.339855e+000	3.040022e+000	69.5	29	6.171705e+000	0	0	0	0	0	0	9.16682	1	0	54.4085	29.3571
DATA	1213	15	23	0	0	A_43_P12000	NM_019272	4149.05	290.392	4.807924e+002	4.816588e+001	520	29	6.607750e+000	0	0	0	0	0	0	472.751	1	1	49.1849	29.9355
DATA	1214	15	24	0	0	A_64_P131395	NM_001037523	4174.58	290.427	7.254684e+000	2.972873e+000	69	30.5	4.811115e+000	0	0	0	0	0	0	7.14497	1	0	57.5363	30.4643
DATA	1215	15	25	0	0	A_42_P682853	NM_017193	4200.06	289.825	5.930135e+002	5.937120e+001	642.5	30	3.619746e+000	0	0	0	0	0	0	584.832	1	1	45.4864	29.4444
DATA	1216	15	26	0	0	A_42_P647505	TC640289	4225.48	290.147	3.870835e+003	3.870941e+002	3787.5	27	6.242092e+000	0	0	0	0	0	0	3822.27	1	1	49.8279	29.4375
DATA	1217	15	27	0	0	A_44_P682959	NM_001025139	4250.82	290.233	2.883714e+000	2.878445e+000	61	31	6.618568e+000	0	0	0	0	0	0	1.82933	0	0	47.8731	30.5313
DATA	1218	15	28	0	0	A_64_P249426	NM_001014271	4276.42	290.427	1.608329e+001	3.289939e+000	75	32	8.751009e+000	0	0	0	0	0	0	15.9117	1	1	57.5363	32.3611
DATA	1219	15	29	0	0	A_64_P133430	NM_001044282	4301.28	290.421	2.487880e+004	2.487882e+003	23800	29	5.586604e+000	0	0	0	0	0	0	24628.7	1	1	49.5074	29.0833
DATA	1220	15	30	0	0	A_42_P635611	NM_001025685	4327	290.455	4.857736e+000	2.907795e+000	65	28.5	5.475927e+000	0	0	0	0	0	0	4.81108	1	0	65	29.5263
DATA	1221	15	31	0	0	A_42_P592013	NM_001127600	4352.25	290.356	2.237986e+003	2.238170e+002	2238.5	31.5	7.959741e+000	0	0	0	0	0	0	2217	1	1	48.5334	31.5667
DATA	1222	15	32	0	1	ETG02_36680	ETG02_36680	4377.58	290.427	4.282764e+000	2.897918e+000	65	30	1.018315e+001	0	0	0	0	0	0	4.24287	1	0	65	30.6
DATA	1223	15	33	0	0	A_42_P608478	NM_001025131	4403.42	290.427	1.475580e+001	3.224014e+000	74.5	31.5	8.219634e+000	0	0	0	0	0	0	14.6162	1	1	57.5363	31.2059
DATA	1224	15	34	0	0	A_44_P137397	NM_017236	4428.58	290.427	9.689088e+004	9.689089e+003	95749	29	8.646275e+000	0	0	0	0	0	0	95941.9	1	1	57.5363	29.875
DATA	1226	15	36	0	0	A_64_P110789	A_64_P110789	4479.5	290.5	7.865175e+000	2.976844e+000	68	30.5	7.704722e+000	0	0	0	0	0	0	7.77843	1	0	57.5363	29.9706
DATA	1227	15	37	0	0	A_64_P061562	A_64_P061562	4504.69	290.532	1.158735e+003	1.159092e+002	1102	28	5.632200e+000	0	0	0	0	0	0	1144.92	1	1	49.8279	28.3103
DATA	1228	15	38	0	0	A_44_P511359	NM_001108736	4529.93	290.732	4.307695e+002	4.317290e+001	481	29	1.040622e+001	0	0	0	0	0	0	425.182	1	1	47.5395	31.0313
DATA	1229	15	39	0	0	A_42_P658220	NM_001109598	4555.46	290.614	2.768728e+003	2.768878e+002	2746.5	29	7.069418e+000	0	0	0	0	0	0	2729.25	1	1	47.5395	29.32
DATA	1230	15	40	0	0	A_42_P479096	NM_001008293	4580.69	290.662	1.296279e+003	1.296600e+002	1324	27	8.493134e+000	0	0	0	0	0	0	1275.94	1	1	48.5334	30.9333
DATA	1231	15	41	0	0	A_64_P275280	NM_001109569	4606.07	290.282	1.022257e+004	1.022261e+003	9727	31	7.412274e+000	0	0	0	0	0	0	10045.2	1	1	47.2035	30.8571
DATA	1232	15	42	0	0	A_42_P785926	NM_001108289	4631.48	290.352	9.903147e+002	9.907377e+001	982	30	6.236643e+000	0	0	0	0	0	0	971.362	1	1	47.8731	28.7941
DATA	1233	15	43	0	0	A_64_P005238	A_64_P005238	4657.33	290.5	4.235039e+001	5.133160e+000	102	30	5.487559e+000	0	0	0	0	0	0	41.456	1	1	65	29.5517
DATA	1234	15	44	0	0	A_42_P555753	NM_001106401	4682.48	290.352	4.599809e+003	4.599901e+002	4369	31.5	8.399106e+000	0	0	0	0	0	0	4492.89	1	1	47.8731	31.2143
DATA	1235	15	45	0	0	A_42_P469751	XM_001054007	4707.89	290.5	8.295605e+002	8.300721e+001	828.5	34	7.254440e+000	0	0	0	0	0	0	808.394	1	1	56.9804	33.5758
DATA	1236	15	46	0	0	A_44_P506124	XM_222590	4733.25	290.627	4.676462e+003	4.676554e+002	4605	34.5	7.625200e+000	0	0	0	0	0	0	4545.8	1	1	46.1809	34.8333
DATA	1237	15	47	0	0	A_44_P441947	XM_001079870	4758.35	290.594	1.120463e+003	1.120846e+002	1184	32	7.240134e+000	0	0	0	0	0	0	1086.28	1	1	47.2035	32.8333
DATA	1238	15	48	0	0	A_64_P127659	NM_001106228	4784.31	290.797	5.377783e+003	5.377863e+002	5110	32.5	8.343193e+000	0	0	0	0	0	0	5198.77	1	1	49.1849	34.4375
DATA	1239	15	49	0	0	A_42_P733076	NM_001033867	4809.5	290.5	2.904316e+002	2.919219e+001	342.5	30	7.837316e+000	0	0	0	0	0	0	279.922	1	1	57.5363	30.4
DATA	1240	15	50	0	0	A_64_P145939	NM_001109499	4835.12	290.676	5.648266e+001	6.374682e+000	115	30	7.164428e+000	0	0	0	0	0	0	54.2679	1	1	48.8603	29.9355
DATA	1241	15	51	0	0	A_44_P1040796	NM_001106660	4860.5	290.5	1.219064e+004	1.219067e+003	11465	34	2.451637e+000	0	0	0	0	0	0	11673.9	1	1	49.1849	34.3
DATA	1242	15	52	0	0	A_42_P588072	NM_001106829	4885.58	290.573	2.805136e+001	4.089003e+000	85.5	31.5	7.124373e+000	0	0	0	0	0	0	26.7719	1	1	57.5363	31.9706
DATA	1243	15	53	0	0	A_64_P045823	ENSRNOT00000023172	4911	290.545	2.135803e+002	2.156571e+001	259	32	6.368794e+000	0	0	0	0	0	0	203.113	1	1	65	32.1923
DATA	1244	15	54	0	0	A_42_P591344	NM_001037780	4936.46	290.872	2.962753e+002	2.977870e+001	340	29	4.685250e+000	0	0	0	0	0	0	280.726	1	1	50.1463	28.4815
DATA	1245	15	55	0	0	A_64_P120322	A_64_P120322	4961.58	290.573	6.503336e+000	3.077636e+000	67	29	7.119667e+000	0	0	0	0	0	0	6.13852	1	0	57.5363	29.7586
DATA	1246	15	56	0	0	A_64_P062665	NM_001170470	4986.79	291.045	3.965504e+002	3.976985e+001	429	33	5.931351e+000	0	0	0	0	0	0	372.871	1	1	46.1809	32.0294
DATA	1247	15	57	0	0	A_44_P398300	NM_001005538	5012.5	290.5	2.853238e+003	2.853399e+002	2635.5	29	5.256931e+000	0	0	0	0	0	0	2671.65	1	1	49.1849	28.5926
DATA	1248	15	58	0	0	A_64_P001545	ENSRNOT00000029141	5038.09	290.614	4.460264e+004	4.460265e+003	41683.5	29	7.715540e+000	0	0	0	0	0	0	41589.8	1	1	57.259	30.6207
DATA	1249	15	59	0	0	A_44_P1010653	NM_001109021	5063.5	290.735	6.490978e+003	6.491050e+002	5828.5	31	7.457879e+000	0	0	0	0	0	0	6026.83	1	1	46.5243	32.8438
DATA	1250	15	60	0	0	A_44_P398969	NM_001013225	5088.61	290.931	4.768801e+002	4.778680e+001	494.5	30	7.627407e+000	0	0	0	0	0	0	440.888	1	1	53.8203	30.9655
DATA	1251	15	61	0	0	A_64_P059495	NM_001109986	5114.44	290.973	4.105723e+003	4.105839e+002	3809	31.5	6.698859e+000	0	0	0	0	0	0	3778.71	1	1	48.5334	32.2333
DATA	1252	15	62	0	0	A_64_P037040	A_64_P037040	5139.81	290.974	3.086501e+002	3.102021e+001	340.5	32	7.125289e+000	0	0	0	0	0	0	282.781	1	1	49.1849	32.7714
DATA	1253	15	63	0	0	A_64_P051446	NM_001142942	5165.01	290.882	7.531662e+003	7.531726e+002	6640	32	7.841851e+000	0	0	0	0	0	0	6868.75	1	1	46.8651	31.1935
DATA	1254	15	64	0	0	A_42_P701756	NM_001107646	5190.38	291	3.194342e+003	3.194495e+002	2919	31	9.623725e+000	0	0	0	0	0	0	2899.65	1	1	48.5334	33.0667
DATA	1255	15	65	0	0	A_44_P172604	NM_031795	5215.68	290.863	2.201409e+003	2.201633e+002	1962	28.5	8.705243e+000	0	0	0	0	0	0	1988.84	1	1	48.2044	30.6563
DATA	1256	15	66	0	0	A_64_P152000	A_64_P152000	5241.5	291	4.578959e+000	3.191204e+000	65	30	4.949592e+000	0	0	0	0	0	0	4.11676	1	0	54.1152	30.5385
DATA	1257	15	67	0	0	A_44_P339008	NM_001024975	5266.36	290.781	1.387536e+003	1.387899e+002	1291	32	8.039078e+000	0	0	0	0	0	0	1241.52	1	1	44.7812	33.3704
DATA	1258	15	68	0	0	A_44_P560070	A_44_P560070	5292	291	6.521969e+000	3.254926e+000	66	33	5.397930e+000	0	0	0	0	0	0	5.80713	1	0	54.9904	32.6154
DATA	1259	15	69	0	0	A_44_P520509	NM_001033868	5317.68	290.988	4.759265e+003	4.759373e+002	4161	28	7.448212e+000	0	0	0	0	0	0	4216.59	1	1	49.1849	30.8
DATA	1260	15	70	0	0	A_42_P643349	NM_001109495	5342.83	290.971	5.622961e+001	6.479950e+000	111	28	6.380967e+000	0	0	0	0	0	0	49.5745	1	1	46.8651	28.1563
DATA	1261	15	71	0	0	A_44_P215075	NM_012667	5368.23	290.884	2.120907e+002	2.145461e+001	247	28	7.868217e+000	0	0	0	1	0	0	186.06	1	1	46.5243	28.2963
DATA	1262	15	72	0	0	A_44_P560363	ENSRNOT00000049736	5393.63	291.127	1.969359e+003	1.969628e+002	1768	26	5.040859e+000	0	0	0	0	0	0	1719.19	1	1	47.5395	26.2222
DATA	1263	15	73	0	0	A_44_P553158	NM_001014014	5418.79	290.806	1.284376e+003	1.284792e+002	1168	31	6.968816e+000	0	0	0	0	0	0	1115.65	1	1	47.5395	31.5758
DATA	1264	15	74	0	0	A_64_P165277	NM_001106370	5444.5	291	1.069065e+001	3.454671e+000	71	32	6.664104e+000	0	0	0	0	0	0	9.24021	1	0	54.1152	30.9063
DATA	1265	15	75	0	0	A_64_P138187	A_64_P138187	5469.81	291.012	1.080669e+003	1.081173e+002	1001.5	32	6.719895e+000	0	0	0	0	0	0	929.48	1	1	49.1849	29.0968
DATA	1266	15	76	0	0	A_44_P429041	XM_227654	5495.3	291.1	2.263807e+002	2.287985e+001	250	29	5.926482e+000	0	0	0	0	0	0	193.76	1	1	47.2035	29.4167
DATA	1267	15	77	0	0	A_44_P465880	NM_199389	5520.5	291	3.392602e+003	3.392766e+002	2887.5	28	7.128138e+000	0	0	0	0	0	0	2889.72	1	1	48.5334	27.5
DATA	1268	15	78	0	0	A_44_P381740	NM_001000239	5545.91	291.386	1.498172e+001	3.669064e+000	71	27.5	7.676322e+000	0	0	0	0	0	0	12.701	1	0	65	28.5
DATA	1269	15	79	0	0	A_64_P045211	NM_001191733	5571.42	291.427	2.692244e+001	4.309605e+000	82	29	8.624094e+000	0	0	0	0	0	0	22.7159	1	1	57.5363	31
DATA	1270	15	80	0	0	A_64_P010896	A_64_P010896	5596.58	291.427	1.033346e+001	3.535178e+000	68	30	5.783364e+000	0	0	0	0	0	0	8.6787	1	0	57.5363	29.2963
DATA	1271	15	81	0	0	A_42_P566906	NM_001006966	5622.18	290.746	4.468859e+003	4.468988e+002	3642.5	26.5	5.962247e+000	0	0	0	0	0	0	3735.27	1	1	45.835	28.25
DATA	1272	15	82	66	1	DarkCorner	DarkCorner	5647.9	291.194	3.425443e+000	3.412111e+000	53	29.5	7.752923e+000	0	0	0	0	0	0	-6.41159	0	0	46.1809	29.5909
DATA	1273	15	83	66	1	DarkCorner	DarkCorner	5673.22	291.458	3.440201e+000	3.426812e+000	54	30	7.625775e+000	0	0	0	0	0	0	-4.01645	0	0	51.4001	30.561
DATA	1274	15	84	66	1	DarkCorner	DarkCorner	5698.85	291.392	3.455108e+000	3.441660e+000	59	27	6.140865e+000	0	0	0	0	0	0	-0.316311	0	0	50.1463	28.0909
DATA	1275	15	85	66	1	DarkCorner	DarkCorner	5723.78	291.303	4.381239e+000	3.483424e+000	63	27	6.249872e+000	0	0	0	0	0	0	3.59981	1	0	49.5074	27.375
DATA	1276	16	1	66	1	DarkCorner	DarkCorner	3603.47	297.247	3.129372e+000	3.117192e+000	59	24	6.199485e+000	0	0	0	0	0	0	-1.14192	0	0	51.0895	23.9143
DATA	1277	16	2	66	1	DarkCorner	DarkCorner	3628.61	297.362	3.113256e+000	3.101139e+000	54	26.5	7.681969e+000	0	0	0	0	0	0	-5.22357	0	0	47.5395	28.4333
DATA	1278	16	3	66	1	DarkCorner	DarkCorner	3654.14	297.407	3.097419e+000	3.085363e+000	55	27	4.930624e+000	0	0	0	0	0	0	-3.57239	0	0	56.9804	28.1471
DATA	1279	16	4	66	1	DarkCorner	DarkCorner	3679.5	297.352	3.082241e+000	3.070245e+000	56	27	7.348276e+000	0	0	0	0	0	0	-4.19548	0	0	57.5363	26.9474
DATA	1280	16	5	0	0	A_42_P708614	NM_001130505	3704.89	297.5	5.374117e+004	5.374117e+003	48924	30	6.994613e+000	0	0	0	1	0	0	49940.5	1	1	56.9804	29.7308
DATA	1281	16	6	0	0	A_44_P427177	NM_053923	3729.96	297.581	3.053328e+000	3.048595e+000	60.5	26	7.412256e+000	0	0	0	0	0	0	1.94819	0	0	48.8603	27.3077
DATA	1282	16	7	0	0	A_44_P417051	NM_001024886	3755.58	297.427	5.975798e+001	6.699059e+000	115.5	30	7.068629e+000	0	0	0	0	0	0	56.0406	1	1	65	30.5862
DATA	1283	16	8	0	0	A_64_P052917	ENSRNOT00000029053	3781.11	297.5	4.010244e+001	5.016894e+000	95	31	9.628667e+000	0	0	0	0	0	0	37.7731	1	1	65	32.2105
DATA	1284	16	9	0	0	A_42_P689013	NM_053800	3806.14	296.97	1.716229e+004	1.716231e+003	15785	29	8.449506e+000	0	0	0	0	0	0	16230.9	1	1	46.5243	30.6563
DATA	1285	16	10	0	0	A_42_P668072	NM_013130	3831.67	297.5	1.657738e+002	1.684486e+001	219	27	7.369477e+000	0	0	0	0	0	0	157.429	1	1	57.5363	28.0333
DATA	1286	16	11	0	0	A_44_P762596	XM_237156	3857.43	296.968	2.788937e+002	2.804796e+001	322.5	30	9.424340e+000	0	0	0	0	0	0	265.874	1	1	44.0646	30.4545
DATA	1287	16	12	0	0	A_44_P673662	TC577636	3882.72	296.875	4.278806e+001	5.207138e+000	100	28	7.804413e+000	0	0	0	0	0	0	40.9408	1	1	45.4864	29.8621
DATA	1288	16	13	0	0	A_42_P674598	NM_013067	3908.11	297.5	3.855708e+004	3.855710e+003	35813	28	8.451251e+000	0	0	0	0	0	0	37026.8	1	1	56.9804	30.931
DATA	1289	16	14	0	0	A_44_P529994	NM_001191720	3933.47	297.597	1.650725e+001	3.377647e+000	75	28	8.161023e+000	0	0	0	0	0	0	15.9056	1	1	48.2044	28.1333
DATA	1290	16	15	0	0	A_42_P655644	NM_133618	3958.5	297.5	9.918909e+002	9.923258e+001	1009.5	32	4.830459e+000	0	0	0	0	0	0	958.731	1	1	49.1849	31.3333
DATA	1291	16	16	0	0	A_42_P589674	NM_001044225	3983.73	297.592	7.130869e+003	7.130929e+002	6853	28	1.013196e+001	0	0	0	0	0	0	6913.21	1	1	47.8731	31.36
DATA	1292	16	17	0	0	A_64_P010139	A_64_P010139	4009.61	297.421	1.549730e+002	1.577008e+001	208.5	26	8.623344e+000	0	0	0	0	0	0	150.672	1	1	49.5074	28.1724
DATA	1293	16	18	0	0	A_42_P586883	NM_001106416	4035	297.545	5.216778e+001	5.974823e+000	114	28	6.308823e+000	0	0	0	0	0	0	50.8551	1	1	55.8519	29.3235
DATA	1294	16	19	0	0	A_42_P461144	DV724416	4060.47	297.247	1.894586e+003	1.894809e+002	1850	28	4.637606e+000	0	0	0	0	0	0	1851.39	1	1	48.8603	28.6897
DATA	1295	16	20	0	0	A_64_P130565	NM_031668	4085.65	297.222	2.682876e+002	2.698495e+001	329	29	6.543903e+000	0	0	0	0	0	0	262.761	1	1	47.5395	28.4138
DATA	1296	16	21	0	0	A_64_P002826	NM_001134527	4111.21	297.74	1.616704e+002	1.642382e+001	219	30	5.261182e+000	0	0	0	0	0	0	158.683	1	1	48.5334	29.3235
DATA	1298	16	23	0	0	A_64_P036099	A_64_P036099	4161.87	297.624	2.021538e+003	2.021744e+002	2071	29	5.178008e+000	0	0	0	0	0	0	1991.26	1	1	52.0157	29.2
DATA	1299	16	24	0	0	A_64_P080580	ENSRNOT00000040473	4187.37	297.794	9.745462e+002	9.749711e+001	998	31	7.755659e+000	0	0	0	0	0	0	961.421	1	1	46.8651	33.3103
DATA	1300	16	25	0	0	A_43_P12276	NM_022636	4212.66	297.431	3.893700e+001	4.839818e+000	94.5	28	6.511528e+000	0	0	0	0	0	0	38.461	1	1	45.1352	28
DATA	1301	16	26	0	0	A_42_P505393	NM_199085	4238.42	297.581	3.664449e+002	3.675680e+001	410	29.5	7.663618e+000	0	0	0	0	0	0	362.382	1	1	49.5074	30.4
DATA	1302	16	27	0	0	A_44_P883619	ENSRNOT00000032374	4263.07	298.357	2.879593e+000	2.868385e+000	60.5	29	7.751172e+000	0	0	0	0	0	0	-0.801488	0	0	36.5637	30.9143
DATA	1303	16	28	0	0	A_44_P493894	ENSRNOT00000050156	4289	297.545	1.592755e+005	1.592755e+004	156444	33	8.716216e+000	0	0	0	0	0	0	157767	1	1	55.8519	33.4
DATA	1304	16	29	0	0	A_64_P085334	TC585414	4314.18	297.632	1.126655e+004	1.126658e+003	10954	29	6.077649e+000	0	0	0	0	0	0	11165.9	1	1	49.5074	29.9429
DATA	1306	16	31	0	0	A_64_P045433	A_64_P045433	4365.23	297.884	4.238297e+003	4.238394e+002	4178	32	7.181608e+000	0	0	0	0	0	0	4202.58	1	1	46.5243	32.037
DATA	1307	16	32	0	0	A_64_P025351	AY724474	4390.5	297.648	4.247701e+004	4.247702e+003	41982.5	29	1.125090e+001	0	0	0	0	0	0	42115.7	1	1	57.5363	31.871
DATA	1308	16	33	0	0	A_44_P501626	ENSRNOT00000050744	4415.91	297.614	9.117861e+000	3.006078e+000	70	28	7.986843e+000	0	0	0	0	0	0	9.03807	1	0	57.259	29.7059
DATA	1309	16	34	0	0	A_64_P071525	NM_001000141	4441.5	298	2.876788e+000	2.865591e+000	60.5	31	1.126055e+001	0	0	0	0	0	0	-0.237217	0	0	54.1152	33
DATA	1310	16	35	0	0	A_64_P006545	A_64_P006545	4466.43	297.761	2.151964e+004	2.151966e+003	21658	33.5	6.820685e+000	0	0	0	0	0	0	21309.2	1	1	46.5243	32.5
DATA	1311	16	36	0	0	A_64_P089561	NM_001044265	4492.09	297.935	7.186728e+001	7.738504e+000	133	30	9.466170e+000	0	0	0	0	0	0	71.1075	1	1	54.4085	30.5862
DATA	1312	16	37	0	0	A_44_P791108	NM_001014070	4517.78	298	3.015297e+001	4.164612e+000	90	29	6.820778e+000	0	0	0	0	0	0	29.8042	1	1	45.4864	29.3611
DATA	1313	16	38	0	0	A_44_P161535	A_44_P161535	4543	298	9.442139e+003	9.442182e+002	9354	29	7.162327e+000	0	0	0	0	0	0	9321.89	1	1	46.8651	28.0323
DATA	1314	16	39	0	0	A_44_P299136	NM_001108539	4568.3	298.1	2.459511e+002	2.476315e+001	299	30	7.327698e+000	0	0	0	0	0	0	242.49	1	1	47.2035	31.1852
DATA	1315	16	40	1028	1	(+)E1A_r60_a97	E1A_r60_a97	4593.7	297.879	9.099287e+000	3.024594e+000	67	28.5	7.046658e+000	0	0	0	0	0	0	8.95708	1	0	45.835	30.1538
DATA	1316	16	41	0	0	A_44_P161723	NM_001134526	4619.08	297.985	3.348373e+002	3.360817e+001	392	28	4.701336e+000	0	0	0	0	0	0	329.038	1	1	46.8651	27.1111
DATA	1317	16	42	0	0	A_64_P121443	A_64_P121443	4644.48	298.03	2.906250e+000	2.894985e+000	60.5	30	5.516667e+000	0	0	0	0	0	0	0.160816	0	0	46.1809	29.0857
DATA	1318	16	43	0	0	A_42_P771373	NM_012614	4669.38	298	2.034432e+004	2.034434e+003	19178	28	6.782540e+000	0	0	0	0	0	0	19913.3	1	1	48.5334	29.8148
DATA	1319	16	44	0	0	A_44_P1025944	NM_147140	4695	298	1.465367e+004	1.465370e+003	13824.5	35.5	7.836541e+000	0	0	0	0	0	0	14310.7	1	1	46.8651	33.8214
DATA	1320	16	45	0	0	A_64_P014085	NM_001007678	4720.5	298	1.366268e+003	1.366579e+002	1328	35	7.287934e+000	0	0	0	0	0	0	1331.05	1	1	48.5334	34.7742
DATA	1321	16	46	0	0	A_64_P095298	NM_001047963	4745.86	297.773	6.569811e+001	7.190356e+000	124.5	32	7.734755e+000	0	0	0	0	0	0	63.8382	1	1	45.835	33.3667
DATA	1322	16	47	0	0	A_64_P122037	A_64_P122037	4771.38	298	2.510581e+004	2.510583e+003	24149	32.5	6.546123e+000	0	0	0	0	0	0	24328.7	1	1	48.5334	33.1
DATA	1323	16	48	0	0	A_64_P098094	A_64_P098094	4796.61	298.069	9.522434e+004	9.522434e+003	92381	32.5	7.269564e+000	0	0	0	0	0	0	92012.5	1	1	53.8203	32.4286
DATA	1324	16	49	0	0	A_44_P353708	ENSRNOT00000033510	4822.13	298	6.182624e+001	6.849299e+000	122	30	7.806733e+000	0	0	0	0	0	0	59.5577	1	1	45.4864	30.5152
DATA	1325	16	50	0	0	A_42_P541669	ENSRNOT00000043345	4847.56	297.973	8.727496e+002	8.732504e+001	875	28	7.499349e+000	0	0	0	0	0	0	838.036	1	1	48.5334	28.3667
DATA	1326	16	51	0	0	A_42_P560894	NM_019138	4872.83	298	5.308752e+003	5.308835e+002	5117	32	7.349810e+000	0	0	0	0	0	0	5080.71	1	1	46.8651	31.6552
DATA	1327	16	52	0	0	A_42_P498066	NM_031136	4898.5	298	7.365289e+004	7.365290e+003	70700	33	6.965506e+000	0	0	0	0	0	0	70241.8	1	1	54.1152	32.4194
DATA	1328	16	53	0	0	A_42_P538928	NM_053021	4923.54	298.118	2.565128e+004	2.565130e+003	23867.5	29.5	4.895063e+000	0	0	0	0	0	0	24376.8	1	1	49.8279	29.9643
DATA	1329	16	54	0	0	A_64_P302169	NM_001099493	4949.18	298.323	3.352380e+001	4.498088e+000	93	28	5.685740e+000	0	0	0	0	0	0	31.7391	1	1	45.4864	27.4074
DATA	1330	16	55	0	0	A_43_P18282	NM_001173436	4974.5	298.444	4.174829e+001	5.147105e+000	99	30.5	7.017231e+000	0	0	0	0	0	0	39.3746	1	1	48.5334	31.0294
DATA	1331	16	56	0	0	A_44_P304169	NM_001000482	5000	297.922	3.564985e+002	3.577778e+001	425	30	4.781500e+000	0	0	0	0	0	0	334.863	1	1	46.1809	29.5294
DATA	1332	16	57	0	0	A_44_P318932	XM_231081	5025.43	298.228	5.802166e+003	5.802245e+002	5415	28.5	5.667484e+000	0	0	0	0	0	0	5428.02	1	1	50.4627	28.75
DATA	1333	16	58	0	0	A_64_P124621	A_64_P124621	5050.58	298.427	4.309638e+001	5.278367e+000	101.5	30.5	7.500529e+000	0	0	0	0	0	0	40.1515	1	1	57.5363	33.4643
DATA	1334	16	59	0	0	A_42_P553960	NM_001107831	5075.99	298.229	1.211072e+004	1.211076e+003	11046	30	6.985342e+000	0	0	0	0	0	0	11234.5	1	1	46.8651	30.5882
DATA	1335	16	60	0	0	A_64_P129459	A_64_P129459	5101.36	297.806	6.872567e+002	6.879440e+001	695	32	6.308064e+000	0	0	0	0	0	0	634.699	1	1	45.835	31.6667
DATA	1336	16	61	0	0	A_64_P083224	ENSRNOT00000017383	5126.95	298.477	3.531934e+001	4.691552e+000	90.5	32	6.311994e+000	0	0	0	0	0	0	32.4753	1	1	55.8519	31.7143
DATA	1337	16	62	0	0	A_64_P031840	NM_001017445	5152.42	298.427	1.538795e+003	1.539107e+002	1427.5	33	6.754224e+000	0	0	0	0	0	0	1408.43	1	1	57.5363	33.0333
DATA	1338	16	63	0	0	A_43_P16427	NM_001191000	5177.58	298.427	2.993511e+001	4.321276e+000	89	32.5	9.754866e+000	0	0	0	0	0	0	27.2738	1	1	57.5363	33.25
DATA	1339	16	64	0	0	A_64_P159034	NM_001191681	5203.31	298.338	3.208837e+004	3.208838e+003	28965.5	32	8.793081e+000	0	0	0	0	0	0	29096.6	1	1	48.5334	32.4194
DATA	1340	16	65	0	0	A_64_P009007	A_64_P009007	5228.5	298.5	4.256441e+001	5.292905e+000	97	29	5.703980e+000	0	0	0	0	0	0	38.4157	1	1	57.5363	28.8462
DATA	1341	16	66	0	0	A_42_P489817	NM_001107681	5253.89	298.215	6.301432e+003	6.301512e+002	5635	31	6.517656e+000	0	0	0	0	0	0	5659.72	1	1	45.835	32.6875
DATA	1342	16	67	0	0	A_42_P643272	NM_053389	5279.16	298.145	2.778112e+003	2.778293e+002	2498	32.5	7.344890e+000	0	0	0	1	0	0	2483.18	1	1	46.8651	32.1471
DATA	1343	16	68	0	0	A_64_P076063	XM_001061753	5304.87	298.066	1.188457e+002	1.230587e+001	166	31.5	6.031188e+000	0	0	0	0	0	0	105.704	1	1	45.1352	31.4412
DATA	1344	16	69	0	0	A_64_P047371	NM_001109423	5330.05	298.608	2.717305e+003	2.717494e+002	2482	30	8.324730e+000	0	0	0	0	0	0	2405.37	1	1	49.1849	31.3636
DATA	1345	16	70	0	0	A_44_P991940	XM_225667	5355.5	298.5	1.260668e+002	1.301228e+001	169.5	28	8.069856e+000	0	0	0	0	0	0	111.044	1	1	57.5363	29.5484
DATA	1346	16	71	0	0	A_42_P667802	ENSRNOT00000014585	5380.7	298.6	9.376197e+001	9.919971e+000	142	25	6.970175e+000	0	0	0	0	0	0	82.1879	1	1	47.5395	25.8
DATA	1347	16	72	0	0	A_44_P433942	A_44_P433942	5406.17	298.359	1.827205e+001	3.733194e+000	76	29	6.861307e+000	0	0	0	0	0	0	15.9368	1	1	45.1352	28.7941
DATA	1348	16	73	0	0	A_42_P735279	NM_001004446	5431.51	298.13	2.509045e+004	2.509047e+003	21491	32	4.939180e+000	0	0	0	0	0	0	21775.5	1	1	47.2035	32.8929
DATA	1349	16	74	0	0	A_64_P000316	A_64_P000316	5457.11	298.5	8.501720e+001	9.115229e+000	133	32	6.661674e+000	0	0	0	0	0	0	73.4271	1	1	56.9804	30.5294
DATA	1350	16	75	0	0	A_64_P073357	XM_001070426	5482.31	298.352	1.104681e+002	1.153022e+001	160.5	28	7.050312e+000	0	0	0	0	0	0	94.9449	1	1	41.4593	29.2759
DATA	1351	16	76	0	0	A_42_P501972	NM_001025418	5507.8	298.212	5.057112e+002	5.067997e+001	478	32	7.233355e+000	0	0	0	1	0	0	432.529	1	1	46.1809	30.8929
DATA	1352	16	77	0	0	A_64_P030824	ENSRNOT00000002002	5533.35	298.708	1.014850e+002	1.068257e+001	147.5	30	6.715844e+000	0	0	0	0	0	0	86.392	1	1	48.2044	29.5556
DATA	1353	16	78	0	0	A_42_P537715	NM_001025743	5558.51	298.573	2.886709e+003	2.886903e+002	2379	31	8.698989e+000	0	0	0	0	0	0	2445.83	1	1	49.1849	31.6207
DATA	1354	16	79	0	0	A_44_P596424	TC642059	5584.22	298.824	7.802901e+002	7.810161e+001	700	28	7.633120e+000	0	0	0	0	0	0	658.045	1	1	48.2044	29.7419
DATA	1355	16	80	0	0	A_42_P528891	XM_001074805	5609.35	298.805	4.055412e+002	4.069491e+001	399	28	5.563157e+000	0	0	0	0	0	0	340.457	1	1	49.5074	27.8889
DATA	1356	16	81	0	0	A_64_P130516	A_64_P130516	5634.58	298.573	9.750420e+001	1.032540e+001	142	28.5	8.435347e+000	0	0	0	0	0	0	81.4863	1	1	57.5363	30.7647
DATA	1357	16	82	66	1	DarkCorner	DarkCorner	5660.31	298.471	3.426139e+000	3.412804e+000	54	34	8.508676e+000	0	0	0	0	0	0	-4.10786	0	0	46.5243	31.9512
DATA	1358	16	83	66	1	DarkCorner	DarkCorner	5686.62	298.31	3.441531e+000	3.428137e+000	52	28	7.853975e+000	0	0	0	0	0	0	-5.56316	0	0	48.2044	29.5278
DATA	1359	16	84	66	1	DarkCorner	DarkCorner	5711.51	298.579	3.455341e+000	3.441893e+000	57	26	4.456688e+000	0	0	0	0	0	0	-2.052	0	0	49.8279	26
DATA	1360	16	85	66	1	DarkCorner	DarkCorner	5736.95	298.821	6.542565e+000	3.516960e+000	62	26	7.020552e+000	0	0	0	0	0	0	5.37594	1	0	51.7088	26.2987
DATA	1361	17	1	66	1	DarkCorner	DarkCorner	3590.5	304.5	3.132986e+000	3.130734e+000	61.5	25	6.246713e+000	0	0	0	0	0	0	2.26816	0	0	57.5363	24.7024
DATA	1362	17	2	66	1	DarkCorner	DarkCorner	3615.88	304.444	3.116745e+000	3.104615e+000	56	25	4.914946e+000	0	0	0	0	0	0	-3.01347	0	0	50.4627	26.1852
DATA	1363	17	3	66	1	DarkCorner	DarkCorner	3641.3	304.589	3.100816e+000	3.088747e+000	55.5	28	8.508313e+000	0	0	0	0	0	0	-4.80811	0	0	48.5334	30.4839
DATA	1364	17	4	66	1	DarkCorner	DarkCorner	3666.99	304.773	3.085193e+000	3.073185e+000	56	27	6.253470e+000	0	0	0	0	0	0	-3.16921	0	0	49.1849	28.8
DATA	1365	17	5	0	0	A_44_P434817	NM_001012187	3691.97	304.68	3.957858e+003	3.957976e+002	3577	31	7.804098e+000	0	0	0	0	0	0	3674.1	1	1	49.1849	30.7586
DATA	1366	17	6	0	0	A_64_P153319	A_64_P153319	3717.5	304.5	8.608868e+002	8.614250e+001	876.5	27	6.815297e+000	0	0	0	0	0	0	802.911	1	1	57.5363	27.6552
DATA	1367	17	7	0	0	A_64_P034394	XM_218828	3742.89	304.5	1.858307e+001	3.554992e+000	77	27	7.154279e+000	0	0	0	0	0	0	17.4105	1	1	65	28.0606
DATA	1368	17	8	0	0	A_64_P001399	A_64_P001399	3768.14	304.877	1.178453e+004	1.178457e+003	11081	30	7.208422e+000	0	0	0	0	0	0	11090	1	1	46.1809	29.7429
DATA	1369	17	9	0	0	A_42_P712191	NM_001109207	3793.78	304.236	2.529313e+002	2.547097e+001	302.5	30	9.297550e+000	0	0	0	0	0	0	239.02	1	1	48.2044	30.8889
DATA	1370	17	10	0	0	A_44_P746633	NM_001109580	3818.99	304.411	1.517116e+004	1.517119e+003	13776	27.5	7.793602e+000	0	0	0	0	0	0	14395.5	1	1	48.5334	29.8667
DATA	1371	17	11	0	0	A_42_P772157	NM_017020	3844.56	304.534	1.253190e+003	1.253544e+002	1239	28.5	6.890343e+000	0	0	0	0	0	0	1193.85	1	1	49.1849	28.0882
DATA	1372	17	12	0	0	A_44_P407543	NM_001024996	3870.04	304.786	1.096132e+002	1.135635e+001	167.5	30	7.722573e+000	0	0	0	0	0	0	104.822	1	1	46.8651	30.027
DATA	1374	17	14	0	0	A_64_P057225	NM_001008857	3920.58	304.573	9.432811e+001	9.882929e+000	152	30	9.574957e+000	0	0	0	0	0	0	90.8339	1	1	57.5363	31.5862
DATA	1375	17	15	0	0	A_42_P462015	NM_001011943	3945.82	304.831	5.386637e+002	5.394649e+001	571	29	7.547644e+000	0	0	0	0	0	0	520.408	1	1	47.2035	29.1786
DATA	1376	17	16	0	0	A_42_P596050	NM_053572	3971.5	304.782	6.866244e+002	6.872493e+001	706	30	6.164414e+000	0	0	0	1	0	0	665.416	1	1	49.8279	31.6667
DATA	1377	17	17	0	0	A_44_P213776	NM_052829	3997	304.545	7.685188e+001	8.221753e+000	135	27	7.446781e+000	0	0	0	0	0	0	74.6923	1	1	55.8519	28.7273
DATA	1378	17	18	0	0	A_64_P004468	A_64_P004468	4022.19	304.588	5.463540e+003	5.463618e+002	5387	27	7.054797e+000	0	0	0	0	0	0	5324.36	1	1	46.5243	29.3125
DATA	1379	17	19	0	0	A_44_P290394	NM_053580	4047.46	304.614	4.125007e+003	4.125109e+002	3942	28	5.426934e+000	0	0	0	0	0	0	4030.07	1	1	47.5395	28.5806
DATA	1380	17	20	0	0	A_64_P076911	XM_215948	4073.09	304.614	5.780871e+001	6.467227e+000	116	29.5	5.867218e+000	0	0	0	0	0	0	56.6122	1	1	57.259	29
DATA	1381	17	21	0	0	A_64_P155895	NM_001009658	4098.19	305.043	3.671120e+003	3.671234e+002	3598	30	7.414058e+000	0	0	0	0	0	0	3603.02	1	1	46.8651	29.9444
DATA	1382	17	22	0	0	A_43_P16338	ENSRNOT00000034555	4123.54	305.056	6.264590e+001	6.897971e+000	122	28	6.328380e+000	0	0	0	0	0	0	61.605	1	1	48.2044	29.125
DATA	1383	17	23	0	0	A_42_P716283	NM_001107983	4149.17	305	1.230274e+003	1.230612e+002	1267	28	6.379065e+000	0	0	0	1	0	0	1212	1	1	46.8651	28.6774
DATA	1384	17	24	0	0	A_43_P13355	NM_139082	4174.27	305.055	2.071070e+002	2.090967e+001	268	31.5	5.757953e+000	0	0	0	0	0	0	204.353	1	1	48.5334	32.5333
DATA	1385	17	25	0	0	A_64_P126065	NM_001005900	4199.83	304.696	6.733510e+001	7.321105e+000	132	30	6.937819e+000	0	0	0	0	0	0	66.5302	1	1	46.8651	30.0667
DATA	1386	17	26	0	0	A_44_P838532	NM_001107144	4225.43	304.754	1.091642e+003	1.092019e+002	1133	28.5	8.029358e+000	0	0	0	0	0	0	1079.91	1	1	45.4864	28.8824
DATA	1387	17	27	0	0	A_42_P785861	NM_001009422	4250.7	304.9	4.692363e+003	4.692450e+002	4638	31	8.008841e+000	0	0	0	0	0	0	4646.69	1	1	47.2035	31.6923
DATA	1388	17	28	0	0	A_42_P641962	NM_012999	4276.22	304.866	3.496945e+003	3.497063e+002	3461	32	7.923560e+000	0	0	0	0	0	0	3465.74	1	1	46.1809	31.871
DATA	1389	17	29	0	0	A_64_P085201	TC633318	4301.5	305	1.683145e+002	1.707323e+001	228.5	31.5	5.675996e+000	0	0	0	0	0	0	166.918	1	1	54.1152	30.9286
DATA	1390	17	30	0	0	A_64_P015687	NM_053573	4326.96	305	3.888407e+003	3.888512e+002	3802	28	6.671366e+000	0	0	0	0	0	0	3857.82	1	1	46.8651	30.0882
DATA	1391	17	31	0	0	A_64_P078332	NM_012794	4352.69	305.039	5.067917e+000	2.905754e+000	65	29.5	6.546386e+000	0	0	0	0	0	0	5.02926	1	0	49.1849	30.2
DATA	1392	17	32	0	0	A_42_P637189	NM_031612	4377.59	305.149	6.483822e+003	6.483885e+002	6117.5	28	8.410987e+000	0	0	0	0	0	0	6434.72	1	1	48.5334	28.6786
DATA	1393	17	33	0	0	A_42_P602472	NM_001008290	4403	304.797	3.719753e+003	3.719863e+002	3655	32	1.111663e+001	0	0	0	0	0	0	3690.88	1	1	46.8651	32.7273
DATA	1394	17	34	0	0	A_64_P003749	NM_031799	4428.5	305.056	9.479275e+001	9.902047e+000	156	30	8.306795e+000	0	0	0	0	0	0	94.0278	1	1	48.5334	30.1852
DATA	1395	17	35	0	0	A_42_P785861	NM_001009422	4454.09	304.896	4.842676e+003	4.842761e+002	4761	31	9.309740e+000	0	0	0	0	0	0	4800.94	1	1	46.8651	31.5333
DATA	1396	17	36	0	0	A_64_P138889	NM_001013050	4479.31	304.897	5.629610e+003	5.629683e+002	5644.5	36.5	1.403386e+001	0	0	0	0	0	0	5577.1	1	1	45.835	38.4167
DATA	1397	17	37	0	0	A_44_P409820	NM_012908	4504.56	305.027	7.499164e+001	8.029116e+000	128	28	6.190096e+000	0	0	0	0	0	0	74.2264	1	1	48.5334	29.5294
DATA	1398	17	38	0	0	A_44_P529880	ENSRNOT00000033370	4530.39	305.069	2.883063e+000	2.871842e+000	57	29	7.291820e+000	0	0	0	0	0	0	-3.33895	0	0	53.8203	29.4722
DATA	1399	17	39	0	0	A_64_P084851	ENSRNOT00000029593	4555.5	305	1.016336e+002	1.056230e+001	158	27	7.055930e+000	0	0	0	0	0	0	100.358	1	1	54.1152	27.8846
DATA	1400	17	40	0	0	A_44_P654068	NM_001114402	4580.91	305.065	5.621609e+002	5.628980e+001	593	30	6.936423e+000	0	0	0	0	0	0	554.3	1	1	54.4085	31.037
DATA	1401	17	41	0	0	A_64_P094855	NM_001109591	4606.44	304.789	2.161597e+003	2.161789e+002	2189.5	29	6.761780e+000	0	0	0	0	0	0	2127.79	1	1	47.5395	29.6897
DATA	1402	17	42	0	0	A_42_P516658	NM_001024888	4631.58	305.427	2.235904e+002	2.254497e+001	282.5	30	5.023790e+000	0	0	0	0	0	0	219.716	1	1	57.5363	28.9615
DATA	1403	17	43	0	0	A_64_P092394	ENSRNOT00000064749	4657.42	305.427	1.949144e+001	3.490267e+000	79	28	5.329364e+000	0	0	0	0	0	0	19.115	1	1	57.5363	29.5714
DATA	1404	17	44	0	0	A_44_P280755	NM_148890	4682.32	304.706	5.902400e+001	6.577095e+000	119	31	7.849728e+000	0	0	0	0	0	0	57.7567	1	1	46.5243	32.1852
DATA	1405	17	45	0	0	A_42_P629062	AF072835	4707.63	305.164	6.735134e+002	6.741410e+001	712	34	6.278796e+000	0	0	0	0	0	0	657.566	1	1	48.5334	33.6429
DATA	1406	17	46	0	0	A_64_P131141	ENSRNOT00000012638	4733.47	305.342	5.220961e+001	5.979880e+000	112	34	8.334621e+000	0	0	0	0	0	0	50.8456	1	1	49.8279	34.1818
DATA	1407	17	47	0	0	A_42_P756350	NM_021772	4758.58	305.427	7.496425e+001	8.046203e+000	133	32	7.607683e+000	0	0	0	0	0	0	72.8155	1	1	57.5363	32.3448
DATA	1408	17	48	66	-1	(-)3xSLv1	NegativeControl	4784.11	305.5	2.942864e+000	2.931410e+000	53.5	33	7.059172e+000	0	0	0	0	0	0	-6.99832	0	0	56.9804	32.7037
DATA	1409	17	49	0	0	A_64_P124796	A_64_P124796	4809.5	305.5	2.707177e+001	3.996620e+000	85	32	9.037971e+000	0	0	0	0	0	0	26.1445	1	1	65	32.9722
DATA	1410	17	50	0	0	A_44_P288443	NM_001108878	4834.89	305.12	9.008147e+002	9.012974e+001	920	29	7.281264e+000	0	0	0	0	0	0	867.218	1	1	47.8731	28.4286
DATA	1411	17	51	0	0	A_42_P748004	NM_001135873	4860.31	305.014	1.864797e+003	1.865032e+002	1833	31	7.495231e+000	0	0	0	0	0	0	1789.39	1	1	47.2035	30.6129
DATA	1412	17	52	0	0	A_64_P067310	NM_001139507	4885.78	304.846	1.535533e+003	1.535820e+002	1534.5	32	8.480328e+000	0	0	0	0	0	0	1468.4	1	1	45.835	30.7143
DATA	1413	17	53	0	0	A_44_P210809	NM_001107334	4911.11	305.5	9.112218e+001	9.586935e+000	151	30	6.714147e+000	0	0	0	0	0	0	86.8403	1	1	56.9804	30.8148
DATA	1414	17	54	1028	1	(+)E1A_r60_a104	E1A_r60_a104	4936.5	305.5	3.001991e+000	2.996050e+000	63	29	3.702702e+000	0	0	0	0	0	0	1.76051	0	0	65	29.72
DATA	1415	17	55	0	0	A_44_P1042711	NM_001108426	4961.63	305.36	1.696064e+002	1.722419e+001	224.5	30.5	7.219386e+000	0	0	0	0	0	0	160.442	1	1	48.8603	30.5333
DATA	1416	17	56	0	0	A_42_P661992	TC596141	4987.33	305.5	1.456549e+002	1.487394e+001	194.5	30.5	5.933786e+000	0	0	0	1	0	0	137.245	1	1	57.5363	30.9211
DATA	1417	17	57	0	0	A_42_P565621	NM_001105971	5012.77	305	6.145030e+001	6.849563e+000	121	30	7.143520e+000	0	0	0	0	0	0	57.6657	1	1	45.4864	31.0667
DATA	1418	17	58	0	0	A_44_P264600	NM_001013132	5038.11	305.5	2.116104e+002	2.137800e+001	256.5	29	9.359803e+000	0	0	0	0	0	0	197.778	1	1	56.9804	30.9655
DATA	1419	17	59	0	0	A_64_P034901	TC591400	5063.74	305.554	8.135165e+000	3.157520e+000	69	29.5	7.795166e+000	0	0	0	0	0	0	7.57114	1	0	45.835	31.2692
DATA	1420	17	60	0	0	A_42_P468216	NM_001030026	5088.46	305.417	3.262193e+003	3.262337e+002	2957.5	32	6.430364e+000	0	0	0	1	0	0	3023.22	1	1	48.2044	31.9429
DATA	1421	17	61	0	0	A_64_P062855	XM_343708	5114.33	305.5	2.233777e+001	3.802791e+000	83	32	7.968599e+000	0	0	0	0	0	0	20.609	1	1	57.5363	30.963
DATA	1422	17	62	0	0	A_64_P048421	AABR03055399	5139.5	305.5	3.103368e+000	3.091289e+000	60.5	32	6.377569e+000	0	0	0	0	0	0	-0.710717	0	0	57.5363	32.8125
DATA	1423	17	63	0	0	A_44_P342166	NM_013187	5165	305.545	1.390809e+002	1.425057e+001	190	30	8.350922e+000	0	0	0	0	0	0	127.165	1	1	55.8519	31.0625
DATA	1424	17	64	0	0	A_42_P748154	XM_001059949	5190.31	305.535	4.413846e+003	4.413956e+002	4003	30	9.471248e+000	0	0	0	0	0	0	4017.1	1	1	47.8731	30.7273
DATA	1425	17	65	0	0	A_64_P157763	A_64_P157763	5215.67	305.5	1.673705e+003	1.673998e+002	1474.5	30	6.729785e+000	0	0	0	0	0	0	1516.13	1	1	57.5363	30.04
DATA	1426	17	66	0	0	A_64_P155645	NM_022706	5241.07	305.268	8.621823e+003	8.621881e+002	7634	30	5.903827e+000	0	0	0	0	0	0	7772.81	1	1	47.5395	30.8
DATA	1427	17	67	0	0	A_42_P622436	NM_022298	5266.58	305.573	8.499243e+004	8.499244e+003	75852	32	5.868993e+000	0	0	0	0	0	0	76259.5	1	1	57.5363	33.8485
DATA	1428	17	68	0	0	A_44_P304190	NM_001014044	5291.94	305.313	1.455757e+002	1.490084e+001	192	31	6.545877e+000	0	0	0	0	0	0	129.983	1	1	45.835	30.5526
DATA	1429	17	69	1028	1	(+)E1A_r60_a104	E1A_r60_a104	5317.61	305.714	3.207886e+000	3.195401e+000	58	33	7.756134e+000	0	0	0	0	0	0	-1.67741	0	0	51.7088	33.625
DATA	1430	17	70	0	0	A_42_P771373	NM_012614	5342.51	305.633	2.005921e+004	2.005924e+003	17487	30	6.794944e+000	0	0	0	1	0	0	17739	1	1	49.8279	30.9667
DATA	1431	17	71	0	0	A_64_P101976	A_64_P101976	5368.51	305.986	1.984731e+001	3.788202e+000	76	28	1.051348e+001	0	0	0	0	0	0	17.4652	1	1	48.5334	30.8667
DATA	1432	17	72	0	0	A_42_P777935	ENSRNOT00000027369	5393.3	306	2.278691e+002	2.301639e+001	252	24	7.675978e+000	0	0	0	0	0	0	199.565	1	1	45.4864	26.4286
DATA	1433	17	73	0	0	A_64_P041521	NM_012945	5419	305.545	1.598627e+002	1.631498e+001	201	31	7.100716e+000	0	0	0	0	0	0	139.302	1	1	55.8519	31.1429
DATA	1434	17	74	0	0	A_44_P102661	NM_138862	5444.13	305.377	2.233349e+003	2.233589e+002	1922	32	8.016113e+000	0	0	0	0	0	0	1936.66	1	1	46.8651	31
DATA	1435	17	75	0	0	A_42_P714166	NM_001017491	5469.78	305.271	4.955597e+000	3.327649e+000	64	27.5	7.287482e+000	0	0	0	0	0	0	4.27616	1	0	43.3362	28.9737
DATA	1436	17	76	0	0	A_64_P098703	NM_198728	5495.25	305.662	9.041492e+002	9.047535e+001	816	30	8.010854e+000	0	0	0	0	0	0	776.494	1	1	45.1352	30.5926
DATA	1437	17	77	0	0	A_44_P624151	NM_001107932	5520.47	305.781	1.095551e+003	1.096054e+002	973	32	4.923554e+000	0	0	0	0	0	0	936.447	1	1	48.2044	30.7931
DATA	1438	17	78	0	0	A_42_P674843	NM_001008880	5545.65	305.88	1.199733e+003	1.200197e+002	1067	29	8.528414e+000	0	0	0	0	0	0	1020.73	1	1	48.8603	29.5769
DATA	1439	17	79	0	0	A_44_P1039634	NM_001108924	5571.5	306	1.253039e+002	1.297127e+001	168.5	31	8.518624e+000	0	0	0	0	0	0	106.107	1	1	54.1152	31.5185
DATA	1440	17	80	0	0	A_42_P517253	NM_001012275	5596.59	305.958	3.771172e+002	3.786185e+001	379.5	26	5.195511e+000	0	0	0	1	0	0	317.895	1	1	48.2044	28.08
DATA	1441	17	81	0	0	A_42_P485589	NM_017246	5622	305.916	8.265299e+001	8.931064e+000	123	27	6.672038e+000	0	0	0	0	0	0	69.3594	1	1	46.8651	28.3667
DATA	1442	17	82	66	1	DarkCorner	DarkCorner	5647.5	306	3.411810e+000	3.398531e+000	52	33	8.729014e+000	0	0	0	0	0	0	-5.89223	0	0	54.1152	32.2564
DATA	1443	17	83	66	1	DarkCorner	DarkCorner	5673.26	305.971	3.426754e+000	3.413417e+000	54.5	28.5	7.242697e+000	0	0	0	0	0	0	-3.38005	0	0	46.1809	29.9091
DATA	1444	17	84	66	1	DarkCorner	DarkCorner	5698.25	305.924	3.440933e+000	3.427540e+000	55	27	7.608377e+000	0	0	0	0	0	0	-3.88762	0	0	49.1849	29.2286
DATA	1445	17	85	66	1	DarkCorner	DarkCorner	5723.89	305.924	3.455047e+000	3.441600e+000	55	28.5	6.086411e+000	0	0	0	0	0	0	-2.74391	0	0	49.5074	29.4545
DATA	1446	18	1	66	1	DarkCorner	DarkCorner	3603.38	311.878	3.119874e+000	3.107742e+000	59	25.5	7.318763e+000	0	0	0	0	0	0	0.0742877	0	0	48.5334	26.0833
DATA	1447	18	2	66	1	DarkCorner	DarkCorner	3628.5	312	3.104069e+000	3.091987e+000	55	28	6.210000e+000	0	0	0	0	0	0	-3.11031	0	0	54.1152	29.1111
DATA	1448	18	3	66	1	DarkCorner	DarkCorner	3654.06	311.813	3.088649e+000	3.076628e+000	57	25.5	6.943623e+000	0	0	0	0	0	0	-2.7852	0	0	48.8603	26.7059
DATA	1449	18	4	0	0	A_42_P608713	TC595074	3679.09	312.104	6.261312e+002	6.268793e+001	629.5	28	6.415230e+000	0	0	0	0	0	0	580.655	1	1	46.8651	29.5
DATA	1450	18	5	0	0	A_44_P411771	XM_001056376	3704.4	312.053	6.556852e+002	6.563930e+001	652	30	7.373011e+000	0	0	0	0	0	0	610.924	1	1	49.1849	29.1935
DATA	1451	18	6	0	0	A_42_P703647	NM_001108688	3730.24	311.986	3.279397e+001	4.467142e+000	91	27	6.586725e+000	0	0	0	0	0	0	30.6976	1	1	46.8651	27.4194
DATA	1452	18	7	0	0	A_64_P139212	NM_001030052	3755.37	312.127	2.975462e+004	2.975463e+003	28220	28.5	7.195405e+000	0	0	0	0	0	0	27975.7	1	1	47.5395	30.5769
DATA	1453	18	8	0	0	A_64_P082461	FQ211879	3781	312	1.001606e+002	1.045769e+001	152	28.5	8.593602e+000	0	0	0	0	0	0	94.5784	1	1	54.9904	29.9167
DATA	1454	18	9	0	0	A_64_P144053	NM_001108100	3806.44	311.973	3.887596e+002	3.899112e+001	423	31	7.319546e+000	0	0	0	0	0	0	368.614	1	1	48.5334	31
DATA	1455	18	10	0	0	A_42_P455802	NM_001013929	3831.56	312.027	3.456774e+003	3.456903e+002	3280	30	6.813467e+000	0	0	0	0	0	0	3290.59	1	1	48.5334	30.44
DATA	1456	18	11	0	0	A_44_P575367	ENSRNOT00000068160	3857.22	312.373	5.806772e+000	3.027364e+000	65	30	7.258355e+000	0	0	0	0	0	0	5.54927	1	0	46.1809	29.9394
DATA	1457	18	12	0	0	A_64_P008259	ENSRNOT00000040453	3882.57	311.971	2.954265e+003	2.954414e+002	2936	27	6.825325e+000	0	0	0	0	0	0	2833.38	1	1	47.5395	27.6333
DATA	1458	18	13	0	0	A_44_P433935	NM_001024894	3908.16	312.038	7.422247e+000	3.042072e+000	67	27	7.486619e+000	0	0	0	0	0	0	7.14363	1	0	49.1849	28.871
DATA	1459	18	14	0	0	A_64_P027747	TC585156	3933.25	312	1.007255e+004	1.007259e+003	9590	31	9.159924e+000	0	0	0	0	0	0	9726.17	1	1	49.1849	32.0857
DATA	1460	18	15	0	0	A_44_P247880	ENSRNOT00000032333	3958.4	312.208	8.838029e+000	3.061634e+000	70	29	4.971460e+000	0	0	0	0	0	0	8.56094	1	0	49.5074	28.4783
DATA	1461	18	16	0	0	A_44_P422321	NM_001105813	3983.93	312.2	2.417585e+003	2.417762e+002	2357.5	26.5	7.070743e+000	0	0	0	0	0	0	2348.77	1	1	46.8651	28.7333
DATA	1462	18	17	0	0	A_44_P374824	ENSRNOT00000025777	4009.5	312.352	2.758001e+001	4.012471e+000	88	27	6.994368e+000	0	0	0	0	0	0	26.8708	1	1	65	28.2759
DATA	1463	18	18	0	0	A_64_P029482	A_64_P029482	4035	312.455	4.342615e+001	5.225626e+000	104	30	6.383276e+000	0	0	0	0	0	0	42.4207	1	1	55.8519	29.9394
DATA	1464	18	19	0	0	A_64_P083918	NM_053396	4060.12	311.818	2.116754e+001	3.590349e+000	83	28	5.739615e+000	0	0	0	0	0	0	20.7252	1	1	45.835	28.4545
DATA	1465	18	20	1028	1	(+)E1A_r60_3	E1A_r60_3	4085.58	312.427	4.051417e+001	4.978450e+000	96	30	7.577379e+000	0	0	0	0	0	0	39.7598	1	1	57.5363	30.3333
DATA	1466	18	21	0	0	A_42_P508415	CV108834	4110.84	312.293	1.409390e+002	1.438664e+001	202	30	7.064291e+000	0	0	0	0	0	0	138.595	1	1	49.1849	29.9143
DATA	1467	18	22	0	0	A_64_P018331	NM_001107720	4136.54	312.386	2.021842e+003	2.022047e+002	2002	29	7.531467e+000	0	0	0	0	0	0	1991.98	1	1	47.5395	31.0333
DATA	1468	18	23	0	0	A_64_P142056	NM_001011938	4161.8	312.446	1.201781e+004	1.201784e+003	11745	30	6.148489e+000	0	0	0	0	0	0	11860.1	1	1	48.8603	29.8824
DATA	1469	18	24	0	0	A_44_P1030098	NM_001105866	4187.42	312.427	2.836839e+002	2.851348e+001	344	31	8.742062e+000	0	0	0	0	0	0	280.378	1	1	57.5363	32.9032
DATA	1470	18	25	0	0	A_64_P125958	NM_177933	4212.58	312.427	3.517454e+001	4.539253e+000	94.5	27	8.097535e+000	0	0	0	0	0	0	34.8091	1	1	65	28.1515
DATA	1471	18	26	0	0	A_64_P002066	XM_001056138	4238.33	312.5	6.421048e+001	7.031626e+000	125.5	30	8.122694e+000	0	0	0	0	0	0	63.6146	1	1	57.5363	30.2333
DATA	1472	18	27	0	0	A_42_P521242	ENSRNOT00000003841	4263.31	311.971	4.167925e+002	4.177751e+001	480	29	8.676450e+000	0	0	0	0	0	0	413.266	1	1	46.1809	30.069
DATA	1473	18	28	0	0	A_42_P652827	NM_001024274	4288.56	312.027	4.079682e+003	4.079782e+002	3954	34	5.971257e+000	0	0	0	0	0	0	4048.06	1	1	48.5334	33.4516
DATA	1474	18	29	0	0	A_42_P533792	NM_001106575	4314.12	312.397	1.141583e+004	1.141586e+003	11062	28	6.591012e+000	0	0	0	0	0	0	11333.8	1	1	48.5334	30.0541
DATA	1475	18	30	1028	1	(+)E1A_r60_1	E1A_r60_1	4339.58	312.427	7.643327e+001	8.160534e+000	135.5	31	7.145451e+000	0	0	0	1	0	0	75.9092	1	1	57.5363	30.3333
DATA	1476	18	31	0	0	A_64_P210103	NM_001100666	4365.11	312.5	1.301061e+002	1.332094e+001	188	29	6.381955e+000	0	0	0	0	0	0	129.233	1	1	56.9804	27.963
DATA	1477	18	32	0	0	A_64_P131745	A_64_P131745	4390.75	312.328	5.123902e+001	5.867467e+000	112	27	9.109553e+000	0	0	0	0	0	0	50.8911	1	1	45.1352	28.4706
DATA	1478	18	33	0	0	A_64_P017791	XM_002727063	4415.89	312.5	4.864247e+000	2.900532e+000	64	31	8.230412e+000	0	0	0	0	0	0	4.83012	1	0	56.9804	30.5556
DATA	1479	18	34	0	0	A_42_P560288	NM_198788	4441.16	312.118	1.246144e+004	1.246147e+003	12177	28	6.420161e+000	0	0	0	1	0	0	12368.1	1	1	46.5243	28.4615
DATA	1480	18	35	0	0	A_42_P571463	NM_001013221	4466.54	312.176	2.221679e+003	2.221864e+002	2271	35	1.098141e+001	0	0	0	0	0	0	2203.68	1	1	48.8603	35.4839
DATA	1481	18	36	0	0	A_42_P648207	NM_001013882	4492.11	312.5	6.187586e+002	6.194215e+001	660	32.5	9.636437e+000	0	0	0	0	0	0	613.267	1	1	65	33.6333
DATA	1482	18	37	0	0	A_64_P120833	NM_131910	4517.26	312.616	1.261641e+004	1.261644e+003	12306	33	5.783374e+000	0	0	0	0	0	0	12492.3	1	1	48.5334	31.3529
DATA	1483	18	38	0	0	A_42_P705337	TC582694	4542.69	312.662	2.852010e+003	2.852155e+002	2840.5	28	6.425004e+000	0	0	0	0	0	0	2820.63	1	1	48.5334	28.1143
DATA	1484	18	39	0	0	A_44_P544340	NM_001034939	4567.94	312.611	4.982652e+002	4.990938e+001	536.5	27	6.546032e+000	0	0	0	0	0	0	492.114	1	1	48.2044	28.5357
DATA	1486	18	41	0	0	A_44_P310596	NM_001014166	4619	312.271	8.214630e+002	8.219693e+001	848.5	31	7.653412e+000	0	0	0	0	0	0	808.637	1	1	46.8651	31.6667
DATA	1487	18	42	0	0	A_64_P013409	A_64_P013409	4644.24	312.618	2.901028e+000	2.897582e+000	60	28	3.832709e+000	0	0	0	0	0	0	2.09355	0	0	49.1849	27.7586
DATA	1488	18	43	0	0	A_64_P076485	A_64_P076485	4669.92	312.492	1.865531e+003	1.865755e+002	1890.5	31	7.239493e+000	0	0	0	0	0	0	1829.18	1	1	44.4243	31.8889
DATA	1489	18	44	0	0	A_64_P096121	ENSRNOT00000028891	4695.53	312.891	3.215922e+001	4.331851e+000	93	32	6.522370e+000	0	0	0	0	0	0	31.4632	1	1	44.0646	33.1852
DATA	1490	18	45	0	0	A_42_P521086	NM_001100857	4720.58	312.573	4.331855e+001	5.218078e+000	104	34	9.473648e+000	0	0	0	0	0	0	42.2793	1	1	57.5363	35.4
DATA	1491	18	46	0	0	A_64_P143133	TC637520	4746.18	312.853	2.435097e+001	3.799503e+000	84	33	7.852089e+000	0	0	0	0	0	0	23.7064	1	1	46.1809	33.0303
DATA	1492	18	47	0	0	A_64_P067163	NM_017248	4771.42	312.573	5.483441e+004	5.483442e+003	52450	30	7.661099e+000	0	0	0	0	0	0	53237.2	1	1	57.5363	31.8857
DATA	1493	18	48	0	0	A_64_P118288	NM_053448	4796.59	312.746	3.811943e+002	3.823209e+001	425.5	31.5	8.561878e+000	0	0	0	0	0	0	369.048	1	1	47.5395	33.0667
DATA	1494	18	49	0	0	A_64_P112342	A_64_P112342	4822.38	312.515	4.491791e+001	5.369469e+000	105	28	8.914157e+000	0	0	0	0	0	0	43.3523	1	1	47.2035	30.7073
DATA	1495	18	50	0	0	A_64_P074741	NM_001077680	4847.69	312.583	6.626383e+001	7.253867e+000	125	28	7.979808e+000	0	0	0	0	0	0	63.7533	1	1	48.5334	29.0345
DATA	1496	18	51	0	0	A_64_P153062	NM_001107890	4872.81	312.597	2.958698e+002	2.973476e+001	342	29.5	7.235178e+000	0	0	0	0	0	0	283.732	1	1	50.1463	30.2368
DATA	1497	18	52	0	0	A_64_P051942	A_64_P051942	4898.78	312.557	3.391290e+002	3.404282e+001	392	31.5	7.100062e+000	0	0	0	0	0	0	324.071	1	1	50.4627	31.2059
DATA	1498	18	53	0	0	A_44_P233080	ENSRNOT00000026303	4923.95	312.89	8.448044e+003	8.448097e+002	7865	28.5	6.024970e+000	0	0	0	0	0	0	8044.78	1	1	46.8651	28.8214
DATA	1499	18	54	0	0	A_64_P127747	A_64_P127747	4949.31	313.014	1.281680e+002	1.316156e+001	183	29	6.449692e+000	0	0	0	0	0	0	121.602	1	1	47.2035	28.7931
DATA	1500	18	55	0	0	A_42_P773155	NM_001106996	4974.5	313	3.176817e+004	3.176819e+003	29922	30	4.985496e+000	0	0	0	0	0	0	30026.7	1	1	54.1152	30.2
DATA	1501	18	56	0	0	A_64_P003624	NM_175591	5000	313	4.671048e+001	5.560104e+000	106	30	4.115797e+000	0	0	0	0	0	0	43.9758	1	1	54.9904	30.1613
DATA	1502	18	57	0	0	A_64_P148728	NM_030989	5025.36	312.742	4.602335e+002	4.612287e+001	496	29	6.123850e+000	0	0	0	0	0	0	431.525	1	1	46.1809	28.3077
DATA	1503	18	58	0	0	A_44_P436284	ENSRNOT00000031389	5050.63	312.833	3.151232e+002	3.165869e+001	350	32	9.997923e+000	0	0	0	0	0	0	294.254	1	1	47.8731	34.0385
DATA	1504	18	59	0	0	A_42_P626851	NM_001107917	5076	312.797	1.362198e+003	1.362541e+002	1281	29.5	4.786859e+000	0	0	0	0	0	0	1266.6	1	1	46.8651	29.8929
DATA	1505	18	60	0	0	A_42_P797303	TC587453	5101.3	312.971	2.155304e+004	2.155306e+003	19633	32.5	7.365891e+000	0	0	0	0	0	0	19954.6	1	1	46.1809	31.9722
DATA	1506	18	61	0	0	A_64_P096312	A_64_P096312	5126.46	312.934	4.999463e+003	4.999558e+002	4638	32.5	1.032334e+001	0	0	0	0	0	0	4608.43	1	1	43.7019	31.1429
DATA	1507	18	62	0	0	A_64_P150894	A_64_P150894	5152.5	313	4.768189e+002	4.778221e+001	492.5	32	6.274160e+000	0	0	0	0	0	0	437.507	1	1	48.5334	30.5714
DATA	1508	18	63	0	0	A_64_P241372	NM_001000593	5177.5	313	3.365915e+001	4.581705e+000	91	30.5	7.965803e+000	0	0	0	0	0	0	30.7455	1	1	54.1152	30.1667
DATA	1509	18	64	0	0	A_44_P433621	NM_001025016	5203.13	312.944	4.720995e+002	4.731314e+001	479.5	30	7.095085e+000	0	0	0	0	0	0	429.217	1	1	46.8651	31.0667
DATA	1510	18	65	0	0	A_64_P163511	NM_013190	5228.5	312.821	1.776966e+003	1.777243e+002	1658	30	6.374344e+000	0	0	0	0	0	0	1607.97	1	1	49.1849	30.0323
DATA	1511	18	66	0	0	A_44_P129412	AF155959	5253.9	312.753	2.700491e+003	2.700675e+002	2394	31	6.514364e+000	0	0	0	0	0	0	2432.08	1	1	47.5395	31.7027
DATA	1512	18	67	0	0	A_64_P143037	NM_001025134	5279.16	312.897	5.979897e+002	5.988281e+001	592.5	34.5	7.176280e+000	0	0	0	0	0	0	536.014	1	1	46.5243	33.7188
DATA	1513	18	68	0	0	A_64_P032693	XM_002724830	5305.08	313.048	1.974528e+001	3.745866e+000	79.5	31	8.005649e+000	0	0	0	0	0	0	17.6127	1	1	45.1352	30.5897
DATA	1514	18	69	0	0	A_42_P727368	NM_001025693	5330.09	313.065	6.930657e+001	7.633065e+000	119	32	6.601767e+000	0	0	0	0	0	0	61.5275	1	1	54.4085	32.6
DATA	1515	18	70	0	0	A_64_P075765	A_64_P075765	5355.5	313	2.368949e+001	3.992701e+000	81.5	31	9.248030e+000	0	0	0	0	0	0	20.9284	1	1	54.1152	33.3429
DATA	1516	18	71	0	0	A_42_P639174	NM_001106592	5380.87	313.064	2.025122e+003	2.025379e+002	1795	24.5	9.504766e+000	0	0	0	0	0	0	1780.45	1	1	49.1849	28.5833
DATA	1517	18	72	0	0	A_64_P063135	NM_001109623	5406.42	313.427	1.400391e+002	1.437500e+001	183	26.5	6.900722e+000	0	0	0	0	0	0	122.529	1	1	57.5363	26.8438
DATA	1518	18	73	0	0	A_64_P018236	NM_001108882	5431.58	313.427	3.597305e+000	3.280568e+000	62.5	33	5.880093e+000	0	0	0	0	0	0	3.13243	1	0	57.5363	32.963
DATA	1519	18	74	0	0	A_43_P14648	NM_001012034	5456.56	312.732	1.346057e+003	1.346456e+002	1141	30.5	7.643028e+000	0	0	0	0	0	0	1166.37	1	1	47.5395	30.3889
DATA	1520	18	75	0	0	A_42_P698520	NM_001108216	5482.42	312.845	8.315830e+003	8.315896e+002	7039.5	30	7.584638e+000	0	0	0	1	0	0	7170.8	1	1	47.5395	30.5588
DATA	1521	18	76	0	0	A_43_P19450	NM_001105713	5507.58	313.427	1.734215e+002	1.765482e+001	205	32	6.247963e+000	0	0	0	0	0	0	148.859	1	1	57.5363	31.037
DATA	1522	18	77	0	0	A_64_P013012	XM_225619	5533.44	313.266	6.644219e+002	6.652528e+001	623.5	30.5	5.575405e+000	0	0	0	0	0	0	567.565	1	1	50.7771	31.0417
DATA	1523	18	78	0	0	A_42_P499684	NM_001108642	5558.5	313.231	7.133640e+002	7.141451e+001	657.5	28	8.047733e+000	0	0	0	1	0	0	606.576	1	1	49.8279	28.8621
DATA	1524	18	79	0	0	A_64_P297479	ENSRNOT00000044350	5583.8	313.239	3.248967e+004	3.248968e+003	27705	29	7.942942e+000	0	0	0	0	0	0	27500.2	1	1	46.8651	30.9032
DATA	1525	18	80	0	0	A_64_P103238	NM_001014158	5609.28	313.295	5.974081e+002	5.983577e+001	559.5	28.5	6.024641e+000	0	0	0	0	0	0	503.391	1	1	50.1463	29
DATA	1526	18	81	0	0	A_42_P751562	NM_001037355	5634.72	312.905	7.197079e+003	7.197158e+002	5871.5	31.5	8.651008e+000	0	0	0	1	0	0	6037.07	1	1	48.8603	32.6071
DATA	1527	18	82	66	1	DarkCorner	DarkCorner	5660.33	313.5	3.412497e+000	3.399215e+000	54	31	9.100357e+000	0	0	0	0	0	0	-5.28838	0	0	57.5363	30.6842
DATA	1528	18	83	66	1	DarkCorner	DarkCorner	5685.95	313.587	3.426904e+000	3.413566e+000	52	27	8.413437e+000	0	0	0	0	0	0	-5.68102	0	0	50.4627	29.6053
DATA	1529	18	84	66	1	DarkCorner	DarkCorner	5711	313.455	3.440836e+000	3.427444e+000	57	29	7.710906e+000	0	0	0	0	0	0	-0.012214	0	0	65	30.5161
DATA	1530	18	85	66	1	DarkCorner	DarkCorner	5736.5	313.5	3.454442e+000	3.447980e+000	60.5	26	6.675720e+000	0	0	0	0	0	0	1.80981	0	0	57.5363	26.2572
DATA	1531	19	1	66	1	DarkCorner	DarkCorner	3590.54	319.041	3.123402e+000	3.116896e+000	60	24	6.301209e+000	0	0	0	0	0	0	1.71201	0	0	48.5334	24.6226
DATA	1532	19	2	66	1	DarkCorner	DarkCorner	3615.55	318.979	3.107700e+000	3.100522e+000	63	29	7.610830e+000	0	0	0	0	0	0	1.60099	0	0	37.847	29.4839
DATA	1533	19	3	66	1	DarkCorner	DarkCorner	3641.59	318.986	3.091776e+000	3.079743e+000	58	28	6.147383e+000	0	0	0	0	0	0	-1.55743	0	0	49.1849	29.375
DATA	1534	19	4	66	1	DarkCorner	DarkCorner	3666.61	319.069	3.076898e+000	3.064923e+000	56	27.5	6.179406e+000	0	0	0	0	0	0	-2.20648	0	0	53.8203	28.7667
DATA	1535	19	5	0	0	A_44_P198705	NM_012578	3692.19	319.357	1.647248e+004	1.647251e+003	15017	32.5	7.080684e+000	0	0	0	0	0	0	15334.4	1	1	51.4001	31.1563
DATA	1536	19	6	0	0	A_42_P604252	NM_001108797	3717.57	319.392	8.930636e+002	8.935795e+001	891	28	7.627080e+000	0	0	0	0	0	0	835.208	1	1	49.1849	28.7879
DATA	1537	19	7	0	0	A_43_P20016	NM_001107377	3743	319.455	1.050546e+002	1.093161e+001	155.5	26.5	6.430335e+000	0	0	0	1	0	0	98.6908	1	1	55.8519	28.6429
DATA	1538	19	8	0	0	A_42_P491486	NM_022533	3768.06	319.519	5.243517e+003	5.243603e+002	4774.5	33	6.663443e+000	0	0	0	0	0	0	4947.02	1	1	49.5074	30.5172
DATA	1539	19	9	0	0	A_64_P345929	NM_001191639	3793.58	319.427	2.071232e+001	3.643091e+000	80.5	29	6.631349e+000	0	0	0	0	0	0	19.623	1	1	65	28.7143
DATA	1540	19	10	0	0	A_64_P152047	NM_001000521	3819.42	319.427	1.373284e+001	3.285546e+000	76	31.5	6.751756e+000	0	0	0	0	0	0	13.0639	1	0	57.5363	31
DATA	1541	19	11	0	0	A_42_P724510	NM_001007625	3844.46	319.176	1.930990e+004	1.930992e+003	17905.5	30	7.082656e+000	0	0	0	1	0	0	18438.7	1	1	48.8603	29.3571
DATA	1542	19	12	0	0	A_42_P552906	NM_001007701	3869.8	319.4	1.942170e+003	1.942396e+002	1878	30	6.325810e+000	0	0	0	0	0	0	1861.48	1	1	49.1849	30.3889
DATA	1543	19	13	0	0	A_64_P121673	A_64_P121673	3895.14	319.562	2.103882e+001	3.624959e+000	81	26	5.563117e+000	0	0	0	0	0	0	20.2366	1	1	48.5334	26.5
DATA	1544	19	14	0	0	A_64_P047470	NM_001008875	3920.73	319.4	6.479344e+001	7.115988e+000	122	30.5	9.238617e+000	0	0	0	0	0	0	62.5336	1	1	48.8603	32.2647
DATA	1545	19	15	0	0	A_43_P14911	NM_031512	3946.33	319.5	1.233584e+002	1.267961e+001	178.5	29	7.684512e+000	0	0	0	0	0	0	119.442	1	1	57.5363	29.1379
DATA	1546	19	16	0	0	A_44_P117234	NM_001191788	3971.39	319.408	2.130295e+001	3.617547e+000	81	28	5.775891e+000	0	0	0	0	0	0	20.6881	1	1	47.8731	28.1333
DATA	1547	19	17	0	0	A_64_P066782	ENSRNOT00000046676	3996.89	319.5	6.196777e+002	6.203631e+001	665.5	25	7.352419e+000	0	0	0	0	0	0	603.526	1	1	56.9804	27.5161
DATA	1548	19	18	0	0	A_64_P125013	NM_019167	4022.42	319.427	5.902066e+004	5.902067e+003	57339	31	6.587868e+000	0	0	0	0	0	0	57636.3	1	1	57.5363	31
DATA	1549	19	19	0	0	A_64_P143121	NM_001099510	4047.58	319.427	2.064511e+001	3.560149e+000	79	29	5.521004e+000	0	0	0	0	0	0	20.2107	1	1	57.5363	28.5926
DATA	1550	19	20	0	0	A_64_P065600	NM_022954	4073.11	319.5	5.633673e+000	2.948002e+000	67.5	30	7.596313e+000	0	0	0	0	0	0	5.528	1	0	65	30.6944
DATA	1551	19	21	0	0	A_44_P300818	AF030087	4098.19	319.647	1.221171e+003	1.221512e+002	1240	29.5	7.423244e+000	0	0	0	0	0	0	1200.81	1	1	46.8651	30.2368
DATA	1552	19	22	0	0	A_64_P103130	A_64_P103130	4123.67	319.5	3.613331e+003	3.613446e+002	3681	30	7.930809e+000	0	0	0	0	0	0	3559.93	1	1	57.5363	31.0909
DATA	1553	19	23	0	0	A_64_P064938	NM_001109332	4149.33	319.5	2.274429e+001	3.667361e+000	82.5	29	5.130820e+000	0	0	0	0	0	0	22.4478	1	1	57.5363	29.0882
DATA	1554	19	24	0	0	A_64_P087276	NM_138527	4174.5	319.5	2.883665e+000	2.872441e+000	60	28	7.650107e+000	0	0	0	0	0	0	-2.33127	0	0	65	29.4
DATA	1555	19	25	0	0	A_64_P032728	NM_001037778	4199.69	319.389	2.151755e+004	2.151757e+003	20650	28.5	5.611190e+000	0	0	0	0	0	0	21298.7	1	1	48.2044	28.1786
DATA	1556	19	26	0	0	A_44_P956203	NM_001134992	4225.5	319.5	1.420663e+001	3.197964e+000	72.5	32.5	8.237497e+000	0	0	0	0	0	0	14.0793	1	0	57.5363	30.5278
DATA	1557	19	27	0	0	A_64_P106488	A_64_P106488	4250.67	319.5	5.108505e+001	5.855715e+000	113	30	7.330613e+000	0	0	0	0	0	0	50.6769	1	1	57.5363	30.2593
DATA	1558	19	28	0	0	A_43_P10011	NM_001025274	4276.06	319.538	8.606416e+002	8.611167e+001	916	30	8.480781e+000	0	0	0	0	0	0	854.453	1	1	44.7812	29.931
DATA	1559	19	29	0	0	A_44_P321009	NM_012540	4301.58	319.573	1.520059e+001	3.237264e+000	76	32	6.960250e+000	0	0	0	0	0	0	15.1006	1	1	57.5363	31.4848
DATA	1560	19	30	0	0	A_44_P133453	XM_236776	4326.75	319.658	2.721990e+003	2.722140e+002	2715	27	6.895742e+000	0	0	0	0	0	0	2705.23	1	1	48.2044	28.0857
DATA	1561	19	31	0	0	A_64_P027323	NM_001000088	4352.36	319.884	8.189547e+001	8.673343e+000	144	28	5.850315e+000	0	0	0	0	0	0	81.412	1	1	46.5243	27.6786
DATA	1562	19	32	0	0	A_44_P374568	NM_001107778	4377.57	319.843	5.696345e+002	5.703501e+001	605.5	29	8.871029e+000	0	0	0	0	0	0	566.29	1	1	47.5395	29.1852
DATA	1563	19	33	0	0	A_64_P040176	NM_001108498	4403	319.271	2.159963e+003	2.160152e+002	2137	31	8.128196e+000	0	0	0	0	0	0	2146.81	1	1	46.8651	29.6486
DATA	1564	19	34	0	0	A_64_P347204	ENSRNOT00000002350	4428.75	319.5	1.846476e+002	1.868459e+001	241	29	6.782693e+000	0	0	0	0	0	0	183.464	1	1	48.5334	28.8276
DATA	1565	19	35	0	0	A_64_P142544	A_64_P142544	4454	319.545	1.283857e+001	3.134223e+000	76	31	9.748310e+000	0	0	0	0	0	0	12.7496	1	0	65	32.3793
DATA	1566	19	36	0	0	A_64_P047367	NM_017050	4479.42	319.573	7.484463e+004	7.484464e+003	74860.5	36	9.656974e+000	0	0	0	0	0	0	74272.9	1	1	57.5363	35.4857
DATA	1567	19	37	0	0	A_64_P130858	NM_001003705	4505.09	319.884	6.215734e+001	6.843720e+000	123	28	6.318735e+000	0	0	0	0	0	0	61.6284	1	1	46.8651	28.5938
DATA	1568	19	38	0	0	A_42_P647009	NM_053814	4530.09	320.182	2.216674e+003	2.216860e+002	2183	31	6.347805e+000	0	0	0	0	0	0	2195.53	1	1	45.835	30.1935
DATA	1569	19	39	0	0	A_42_P618538	NM_001030031	4555.37	320.265	1.675232e+003	1.675478e+002	1676	27	6.539799e+000	0	0	0	0	0	0	1657.18	1	1	46.5243	28.3
DATA	1570	19	40	0	0	A_64_P048225	NM_001108643	4580.91	319.614	2.932259e+001	4.106353e+000	88.5	30	7.299369e+000	0	0	0	0	0	0	28.9623	1	1	57.259	31.069
DATA	1571	19	41	0	0	A_64_P044826	A_64_P044826	4606.3	319.9	2.645871e+002	2.661492e+001	328	30	7.075476e+000	0	0	0	0	0	0	260.921	1	1	47.2035	30.0645
DATA	1572	19	42	0	0	A_64_P046273	NM_001168559	4631.43	319.761	2.261233e+002	2.279556e+001	276.5	30	4.756404e+000	0	0	0	0	0	0	222.59	1	1	46.5243	29.6364
DATA	1573	19	43	0	0	A_43_P16232	NM_024395	4656.91	319.896	1.209321e+003	1.209666e+002	1233	27.5	6.251811e+000	0	0	0	0	0	0	1188.1	1	1	46.8651	29.0417
DATA	1574	19	44	0	0	A_44_P147356	XM_225859	4682.55	319.8	1.243544e+004	1.243547e+003	12183	31	7.998656e+000	0	0	0	0	0	0	12190.7	1	1	48.5334	31.3871
DATA	1575	19	45	0	0	A_44_P979417	ENSRNOT00000068382	4707.91	319.935	2.729799e+001	3.984884e+000	86.5	34	5.677981e+000	0	0	0	0	0	0	26.6997	1	1	65	33.85
DATA	1576	19	46	0	0	A_44_P283784	NM_001107682	4733.17	319.986	4.523881e+002	4.533231e+001	484	34	1.085842e+001	0	0	0	0	0	0	441.393	1	1	46.8651	34.697
DATA	1577	19	47	0	0	A_44_P112061	ENSRNOT00000046359	4758.38	320	5.020747e+002	5.029218e+001	526	32.5	6.941794e+000	0	0	0	0	0	0	488.599	1	1	48.5334	32.5333
DATA	1578	19	48	0	0	A_42_P541025	NM_212546	4784.09	319.935	4.510356e+002	4.519836e+001	499.5	29	8.591497e+000	0	0	0	0	0	0	437.693	1	1	54.4085	31.2703
DATA	1579	19	49	0	0	A_44_P156521	NM_001025135	4809.41	319.897	1.123795e+003	1.124179e+002	1156.5	28	9.211176e+000	0	0	0	0	0	0	1087.36	1	1	49.5074	31.1563
DATA	1580	19	50	0	0	A_42_P562202	NM_001107959	4835	320	4.608356e+001	5.468246e+000	104	31	9.623976e+000	0	0	0	0	0	0	44.4522	1	1	54.9904	32.0263
DATA	1581	19	51	0	0	A_42_P522899	NM_021578	4860.22	320	8.137716e+001	8.656950e+000	137	29	6.810649e+000	0	0	0	0	0	0	78.2458	1	1	46.1809	30.4194
DATA	1582	19	52	0	0	A_42_P581060	NM_001108722	4885.38	320	1.268981e+004	1.268984e+003	11905	31.5	7.585267e+000	0	0	0	0	0	0	12161	1	1	48.5334	31.6316
DATA	1583	19	53	0	1	ERCC-00043_129	ERCC-00043_129	4911	320	2.984922e+000	2.973305e+000	59	31	5.548044e+000	0	0	0	0	0	0	-1.45148	0	0	54.9904	31.069
DATA	1584	19	54	0	0	A_64_P098577	A_64_P098577	4936.5	320	2.995784e+000	2.984124e+000	60.5	28	6.941132e+000	0	0	0	0	0	0	-0.503368	0	0	54.1152	27.4
DATA	1585	19	55	0	0	A_64_P043164	ENSRNOT00000009696	4961.93	320.2	4.311309e+002	4.321701e+001	465.5	31	5.940215e+000	0	0	0	0	0	0	408.699	1	1	46.8651	30.6154
DATA	1586	19	56	0	0	A_42_P576446	NM_001107673	4987	320.203	6.620123e+003	6.620191e+002	6182	32	7.739970e+000	0	0	0	0	0	0	6251.84	1	1	46.8651	31.75
DATA	1587	19	57	0	0	A_42_P801593	NM_001134744	5012.5	320	2.597296e+003	2.597472e+002	2438.5	29	5.219690e+000	0	0	0	0	0	0	2442.98	1	1	48.5334	27.6129
DATA	1588	19	58	0	0	A_42_P535743	NM_199393	5037.93	320	4.443422e+003	4.443526e+002	4030	33	1.031959e+001	0	0	0	0	0	0	4162.4	1	1	46.8651	31.5769
DATA	1589	19	59	0	0	A_64_P051890	ENSRNOT00000056631	5063.5	320.352	1.642043e+001	3.458377e+000	74	32	8.757414e+000	0	0	0	0	0	0	15.3183	1	1	57.5363	33
DATA	1590	19	60	0	0	A_64_P098379	NM_001013890	5088.58	320.427	3.068452e+000	3.064000e+000	60	29.5	6.414371e+000	0	0	0	0	0	0	1.9891	0	0	57.5363	30.2188
DATA	1591	19	61	0	0	A_64_P144513	XR_086096	5114.42	320.427	7.222990e+004	7.222991e+003	67002.5	33	1.006489e+001	0	0	0	0	0	0	66802.6	1	1	57.5363	31.9259
DATA	1592	19	62	0	0	A_44_P325337	NM_001030041	5139.43	320.277	9.795886e+001	1.026976e+001	150	31	7.169311e+000	0	0	0	0	0	0	90.2013	1	1	45.4864	30.4483
DATA	1593	19	63	0	0	A_44_P142029	NM_001002851	5164.86	320.278	9.880525e+003	9.880574e+002	9023	30	7.438417e+000	0	0	0	0	0	0	9057.1	1	1	47.8731	29.5172
DATA	1594	19	64	0	0	A_44_P292568	NM_001000207	5190.34	320.592	1.267997e+002	1.305618e+001	174	29.5	7.201520e+000	0	0	0	0	0	0	115.707	1	1	49.5074	29.5938
DATA	1595	19	65	0	0	A_42_P624092	XR_007263	5215.54	320.118	9.727186e+003	9.727236e+002	8458	30	7.045112e+000	0	0	0	0	0	0	8834.75	1	1	49.8279	30.3214
DATA	1596	19	66	0	0	A_42_P597322	NM_001103357	5241.26	320.222	7.312036e+002	7.318780e+001	707.5	31	7.124015e+000	0	0	0	1	0	0	660.986	1	1	47.5395	30.1389
DATA	1597	19	67	0	0	A_64_P034409	NM_001108146	5266.74	320.348	1.891628e+003	1.891891e+002	1780	31	5.660772e+000	0	0	0	0	0	0	1701.92	1	1	47.2035	32.5172
DATA	1598	19	68	0	0	A_64_P112797	NM_001001121	5291.71	320.136	2.502969e+002	2.522974e+001	284	31	8.311981e+000	0	0	0	0	0	0	224.133	1	1	45.835	31.2439
DATA	1599	19	69	0	0	A_42_P761023	NM_001144870	5317.42	320.427	3.628334e+002	3.642296e+001	380	29	6.970892e+000	0	0	0	1	0	0	323.352	1	1	57.5363	31.52
DATA	1600	19	70	0	0	A_42_P465408	NM_031647	5342.58	320.427	1.101791e+003	1.102256e+002	1006	34	8.091559e+000	0	0	0	1	0	0	977.23	1	1	57.5363	35.84
DATA	1601	19	71	0	0	A_64_P115761	NM_001109379	5368.33	320.5	2.676942e+001	4.185078e+000	85	30	9.306739e+000	0	0	0	0	0	0	23.6275	1	1	57.5363	30.6667
DATA	1602	19	72	0	0	A_64_P086487	A_64_P086487	5393.4	320.358	8.358276e+000	3.338731e+000	66	27	7.556149e+000	0	0	0	0	0	0	7.34201	1	0	40.6843	27.8462
DATA	1603	19	73	0	0	A_42_P774028	NM_001017447	5418.78	319.846	2.952658e+003	2.952837e+002	2573	31	8.389462e+000	0	0	0	0	0	0	2580.9	1	1	45.835	29.9375
DATA	1604	19	74	0	0	A_44_P233080	ENSRNOT00000026303	5444.61	320.278	8.600378e+003	8.600440e+002	7374	31	7.387964e+000	0	0	0	0	0	0	7481.59	1	1	48.5334	30.2857
DATA	1605	19	75	0	0	A_64_P078002	ENSRNOT00000056206	5469.67	320.667	1.378006e+001	3.556917e+000	71.5	29	7.659417e+000	0	0	0	0	0	0	11.9321	1	0	48.8603	30
DATA	1606	19	76	0	0	A_64_P047888	A_64_P047888	5495.31	320.329	9.525113e+000	3.430047e+000	66	32	6.243889e+000	0	0	0	0	0	0	8.20771	1	0	47.5395	30.8846
DATA	1607	19	77	0	0	A_44_P236001	NM_001000623	5520.5	320.5	8.456094e+001	9.080986e+000	133	30	5.508605e+000	0	0	0	0	0	0	72.5295	1	1	57.5363	30.037
DATA	1608	19	78	0	0	A_42_P819040	TC636720	5545.89	320.5	2.027399e+001	3.895052e+000	75	29	6.858355e+000	0	0	0	0	0	0	17.3088	1	1	56.9804	28.037
DATA	1609	19	79	0	0	A_44_P168184	NM_001166675	5571.37	320.559	1.768319e+003	1.768635e+002	1535	26	9.215812e+000	0	0	0	0	0	0	1502.79	1	1	46.8651	30.2581
DATA	1610	19	80	0	0	A_64_P094925	NM_001024748	5596.58	320.573	6.006900e+002	6.016268e+001	571	31	6.495087e+000	0	0	0	0	0	0	508.213	1	1	57.5363	30.8846
DATA	1611	19	81	0	0	A_44_P332483	NM_173338	5622.11	320.5	6.175805e+000	3.427179e+000	65	27.5	7.337825e+000	0	0	0	0	0	0	5.20177	1	0	56.9804	28.8667
DATA	1612	19	82	0	0	A_42_P530071	NM_001107153	5647.56	320.466	1.006545e+004	1.006551e+003	8025	31	8.376490e+000	0	0	0	1	0	0	8441.19	1	1	49.1849	30.9677
DATA	1613	19	83	66	1	DarkCorner	DarkCorner	5673	320.683	3.413180e+000	3.399896e+000	55	27	8.744779e+000	0	0	0	0	0	0	-3.29231	0	0	45.4864	29.125
DATA	1614	19	84	66	1	DarkCorner	DarkCorner	5698.75	320.647	3.427426e+000	3.414086e+000	57	30	7.182798e+000	0	0	0	0	0	0	-2.2104	0	0	46.1809	29.8519
DATA	1615	19	85	66	1	DarkCorner	DarkCorner	5723.58	320.573	3.440825e+000	3.431355e+000	60.5	29	6.589260e+000	0	0	0	0	0	0	1.35868	0	0	57.5363	29.2821
DATA	1616	20	1	66	1	DarkCorner	DarkCorner	3603.2	326.593	3.110573e+000	3.103489e+000	61	26.5	7.050053e+000	0	0	0	0	0	0	1.61733	0	0	41.8414	27.1667
DATA	1617	20	2	66	1	DarkCorner	DarkCorner	3628.66	326.525	3.094980e+000	3.082934e+000	56	30	5.977833e+000	0	0	0	0	0	0	-1.58381	0	0	50.4627	29.7
DATA	1618	20	3	66	1	DarkCorner	DarkCorner	3654.08	326.775	3.079674e+000	3.067688e+000	57	27	6.743699e+000	0	0	0	0	0	0	-2.97475	0	0	46.8651	28.4595
DATA	1619	20	4	0	0	A_42_P787775	NM_001127566	3679.37	326.662	8.766850e+002	8.772165e+001	852	28	6.750548e+000	0	0	0	0	0	0	815.294	1	1	48.2044	28.6452
DATA	1620	20	5	0	0	A_42_P607770	NM_001134616	3704.56	326.973	1.146751e+004	1.146755e+003	10462	28	7.670196e+000	0	0	0	1	0	0	10714.3	1	1	48.5334	28.7037
DATA	1621	20	6	0	0	A_42_P484738	NM_022266	3730.44	326.833	1.853680e+003	1.853927e+002	1774.5	28	8.295985e+000	0	0	0	0	0	0	1739.86	1	1	47.8731	30.1481
DATA	1622	20	7	0	0	A_64_P075273	NM_031743	3755.58	326.573	3.381092e+002	3.394484e+001	376.5	29.5	7.535353e+000	0	0	0	0	0	0	318.708	1	1	57.5363	30.3077
DATA	1623	20	8	0	0	A_42_P674050	NM_001107225	3781.17	326.895	9.607081e+003	9.607128e+002	9172	33	8.523844e+000	0	0	0	0	0	0	9094.9	1	1	48.5334	31.4516
DATA	1624	20	9	1028	1	(+)E1A_r60_a107	E1A_r60_a107	3806.42	326.573	2.080687e+001	3.640539e+000	79.5	29	7.143842e+000	0	0	0	0	0	0	19.7764	1	1	57.5363	29.9655
DATA	1625	20	10	0	0	A_64_P144253	NM_201350	3831.58	326.573	2.609076e+001	3.957595e+000	85.5	31	7.159394e+000	0	0	0	0	0	0	24.895	1	1	57.5363	31.5652
DATA	1626	20	11	0	0	A_44_P791729	NM_181377	3857.04	326.796	1.057581e+004	1.057585e+003	10639	30	8.414274e+000	0	0	0	0	0	0	10129.5	1	1	41.8414	32
DATA	1627	20	12	0	0	A_42_P550624	NM_001109319	3882.46	326.746	2.457029e+003	2.457206e+002	2363	30	8.034924e+000	0	0	0	0	0	0	2361.82	1	1	47.5395	29.68
DATA	1628	20	13	0	0	A_43_P11580	NM_012833	3907.74	326.778	2.325549e+002	2.344107e+001	290.5	29	8.059964e+000	0	0	0	0	0	0	224.309	1	1	47.5395	30.4857
DATA	1629	20	14	0	0	A_44_P417055	XM_223442	3933.49	327.125	7.866425e+002	7.871895e+001	821	31	8.632397e+000	0	0	0	0	0	0	761.302	1	1	47.8731	32.4194
DATA	1630	20	15	0	0	A_64_P142867	A_64_P142867	3958.71	326.829	1.287447e+004	1.287451e+003	12538	29	7.381157e+000	0	0	0	0	0	0	12497.5	1	1	50.7771	28.5926
DATA	1631	20	16	0	0	A_64_P013002	XM_001072551	3984.05	326.864	1.523678e+001	3.290546e+000	75	26	6.519348e+000	0	0	0	0	0	0	14.8338	1	1	46.5243	27.2424
DATA	1632	20	17	0	0	A_42_P457692	NM_001008363	4009.44	326.853	6.984407e+003	6.984467e+002	6513	28	7.494442e+000	0	0	0	0	0	0	6818.37	1	1	46.8651	28.5833
DATA	1633	20	18	0	0	A_42_P788480	NM_019194	4035.15	326.893	6.775384e+003	6.775446e+002	6484	30	6.904811e+000	0	0	0	0	0	0	6631.53	1	1	50.1463	28.5313
DATA	1634	20	19	0	0	A_42_P518462	NM_001007020	4060.51	326.87	7.231237e+003	7.231295e+002	7154	29	7.343550e+000	0	0	0	0	0	0	7094.53	1	1	47.2035	28.6857
DATA	1635	20	20	0	0	A_64_P007578	NM_001000851	4085.5	327	1.212439e+001	3.131997e+000	73	32.5	8.646298e+000	0	0	0	0	0	0	11.9212	1	0	54.1152	32.0385
DATA	1636	20	21	0	0	A_64_P139350	NM_001191727	4110.97	326.946	3.129468e+001	4.254339e+000	91	31	6.583376e+000	0	0	0	0	0	0	30.8322	1	1	46.8651	31.2162
DATA	1637	20	22	0	0	A_64_P100442	ENSRNOT00000067861	4136.62	326.882	1.937168e+002	1.958411e+001	249	30	7.786465e+000	0	0	0	0	0	0	191.206	1	1	46.5243	29.625
DATA	1638	20	23	1028	1	(+)E1A_r60_a135	E1A_r60_a135	4162	327	1.026696e+001	3.049927e+000	72	27	5.859465e+000	0	0	0	0	0	0	10.1507	1	0	54.9904	27
DATA	1639	20	24	0	0	A_44_P459760	NM_001108187	4187.29	327.145	4.684423e+001	5.492505e+000	107	27	6.394554e+000	0	0	0	0	0	0	46.3816	1	1	44.7812	28.9032
DATA	1640	20	25	0	0	A_64_P115536	NM_212545	4212.5	327	7.563372e+000	2.962340e+000	68	31	9.010243e+000	0	0	0	0	0	0	7.49797	1	0	54.1152	31.9063
DATA	1641	20	26	0	0	A_44_P538406	NM_013102	4238.01	326.889	1.316150e+004	1.316153e+003	12835	31	7.604911e+000	0	0	0	0	0	0	13061.7	1	1	46.8651	30.8125
DATA	1642	20	27	0	0	A_64_P120871	NM_198743	4263.75	327	7.141711e+002	7.147430e+001	766	29	7.106276e+000	0	0	0	0	0	0	709.4	1	1	49.1849	28.8286
DATA	1643	20	28	0	0	A_44_P173048	NM_001009255	4288.81	327.026	1.332864e+003	1.333170e+002	1389.5	31.5	6.835946e+000	0	0	0	0	0	0	1324.87	1	1	49.1849	32.1111
DATA	1644	20	29	0	0	A_64_P058060	NM_001037541	4313.97	327.449	1.586060e+001	3.265927e+000	77	28.5	6.855134e+000	0	0	0	0	0	0	15.7742	1	1	46.5243	29.0833
DATA	1645	20	30	0	0	A_64_P145982	NM_001109366	4339.32	327.042	3.434343e+001	4.465532e+000	95	28	7.629461e+000	0	0	0	0	0	0	34.1657	1	1	47.2035	27.7188
DATA	1646	20	31	0	0	A_42_P514244	NM_012791	4364.87	327.293	1.715191e+002	1.738768e+001	230	29	6.941625e+000	0	0	0	0	0	0	170.658	1	1	48.2044	30.1154
DATA	1648	20	33	0	0	A_64_P159155	XM_001071429	4416.03	326.935	2.047288e+001	3.512956e+000	80	29	7.052037e+000	0	0	0	0	0	0	20.3629	1	1	45.1352	29.1351
DATA	1649	20	34	0	0	A_64_P030272	ENSRNOT00000041731	4441.48	327.066	1.707778e+002	1.731493e+001	234	28	5.372150e+000	0	0	0	0	0	0	169.788	1	1	43.7019	27.88
DATA	1650	20	35	0	0	A_42_P733076	NM_001033867	4466.58	327.427	2.874050e+002	2.888221e+001	351.5	31	8.881586e+000	0	0	0	0	0	0	285.575	1	1	57.5363	33.4848
DATA	1651	20	36	0	0	A_44_P349475	NM_031333	4492.09	327.386	8.576210e+002	8.580978e+001	898	31	6.504515e+000	0	0	0	0	0	0	851.465	1	1	57.259	31.9394
DATA	1652	20	37	0	0	A_64_P009848	NM_001034135	4517.32	327.312	5.782242e+003	5.782313e+002	5675.5	28	6.316447e+000	0	0	0	0	0	0	5735.04	1	1	49.8279	28.2647
DATA	1653	20	38	0	0	A_64_P116685	NM_001166763	4542.88	327.373	4.384578e+003	4.384672e+002	4427	28	6.488527e+000	0	0	0	0	0	0	4343.69	1	1	48.8603	29.3793
DATA	1654	20	39	0	0	A_64_P072659	NM_001109296	4568.36	327.258	2.259804e+003	2.259987e+002	2337	27	5.295438e+000	0	0	0	0	0	0	2235.66	1	1	46.1809	28.0417
DATA	1655	20	40	0	0	A_42_P808442	NM_001108759	4593.43	327.284	6.246343e+002	6.252953e+001	682	31	6.791511e+000	0	0	0	0	0	0	617.031	1	1	46.5243	30.7308
DATA	1656	20	41	0	0	A_64_P140836	NM_001017486	4619	327.455	1.419376e+002	1.448285e+001	201	28	7.057993e+000	0	0	0	0	0	0	139.972	1	1	55.8519	29.3793
DATA	1657	20	42	0	0	A_64_P034384	NM_019227	4644.5	326.735	2.668397e+002	2.683947e+001	319.5	29	7.109281e+000	0	0	0	0	0	0	262.628	1	1	46.5243	29.4483
DATA	1658	20	43	0	0	A_42_P730411	NM_001012181	4669.72	326.971	6.472423e+002	6.478875e+001	703	31	7.863417e+000	0	0	0	0	0	0	635.75	1	1	46.1809	30.6
DATA	1659	20	44	0	0	A_44_P396450	ENSRNOT00000018433	4695.42	327.427	1.919384e+002	1.941124e+001	248	34	6.226124e+000	0	0	0	0	0	0	188.119	1	1	57.5363	33.7308
DATA	1660	20	45	0	0	A_44_P268610	NM_001109134	4720.32	327.266	5.058055e+003	5.058139e+002	4871	33	7.662856e+000	0	0	0	0	0	0	4945.79	1	1	50.4627	31.913
DATA	1661	20	46	0	0	A_64_P059105	NM_001134544	4746	327.455	8.433996e+001	8.922305e+000	143	32	6.916302e+000	0	0	0	0	0	0	82.259	1	1	55.8519	31.9091
DATA	1662	20	47	0	0	A_42_P524851	NM_001130061	4771.12	327.384	1.772870e+003	1.773110e+002	1708	32.5	7.729380e+000	0	0	0	0	0	0	1724.52	1	1	48.5334	32.1176
DATA	1663	20	48	0	0	A_64_P141675	FM127585	4796.69	327.338	5.931858e+003	5.931930e+002	5655.5	28	9.454446e+000	0	0	0	0	0	0	5753.57	1	1	48.5334	30.7143
DATA	1664	20	49	0	0	A_64_P002979	ENSRNOT00000034762	4822.18	327.597	3.049975e+000	2.951876e+000	62	32	8.830486e+000	0	0	0	0	0	0	2.94954	1	0	47.8731	33.4595
DATA	1665	20	50	0	0	A_44_P175822	NM_001109511	4847.53	327.278	1.109522e+002	1.147951e+001	167	29	7.957554e+000	0	0	0	0	0	0	106.959	1	1	48.2044	29.5862
DATA	1666	20	51	0	0	A_44_P1008751	NM_001137645	4872.89	327.5	2.118329e+002	2.138840e+001	262.5	30	6.750296e+000	0	0	0	0	0	0	203.549	1	1	56.9804	31.069
DATA	1667	20	52	0	0	A_44_P255350	NM_001007674	4898.32	327.382	3.850486e+002	3.861886e+001	431	31	7.882221e+000	0	0	0	0	0	0	368.726	1	1	46.5243	29.6
DATA	1668	20	53	0	0	A_64_P017328	NM_012758	4923.57	326.968	5.914817e+002	5.922297e+001	636	29	6.365083e+000	0	0	0	0	0	0	564.389	1	1	44.0646	29
DATA	1669	20	54	0	0	A_64_P132571	NM_001107703	4949.06	327.538	1.044478e+004	1.044482e+003	9971	28	6.829751e+000	0	0	0	0	0	0	9930.61	1	1	44.7812	28.8571
DATA	1670	20	55	0	0	A_44_P107535	NM_001170336	4974.54	327.614	5.089111e+002	5.097932e+001	534	31	6.063742e+000	0	0	0	0	0	0	482.033	1	1	47.5395	30.7
DATA	1671	20	56	0	0	A_44_P353618	NM_053587	4999.89	327.5	7.407223e+001	7.995228e+000	130	29.5	5.130554e+000	0	0	0	0	0	0	69.887	1	1	65	28.75
DATA	1672	20	57	0	0	A_44_P213336	A_44_P213336	5025.62	327.524	4.623133e+002	4.632997e+001	500.5	29	5.580323e+000	0	0	0	0	0	0	434.429	1	1	51.7088	27.84
DATA	1673	20	58	0	0	A_42_P507072	FQ213070	5050.63	327.36	4.862595e+003	4.862689e+002	4410.5	29	9.939125e+000	0	0	0	0	0	0	4550.77	1	1	48.8603	30.8
DATA	1674	20	59	0	0	A_44_P428886	NM_001099516	5076.39	327.448	5.501809e+002	5.510239e+001	586	30.5	7.477857e+000	0	0	0	0	0	0	512.719	1	1	45.835	30.7813
DATA	1675	20	60	0	0	A_64_P086784	NM_001108657	5101.51	327.427	4.279481e+003	4.279591e+002	3876.5	31	7.398742e+000	0	0	0	0	0	0	3971.2	1	1	49.1849	29.7931
DATA	1676	20	61	0	0	A_42_P654682	NM_012724	5126.89	327.5	5.115468e+000	3.115461e+000	66	32	9.686246e+000	0	0	0	0	0	0	4.72633	1	0	56.9804	31.1481
DATA	1677	20	62	0	0	A_44_P443008	NM_001013068	5152.44	327.813	5.634186e+002	5.642635e+001	564.5	31	5.333349e+000	0	0	0	0	0	0	518.262	1	1	49.1849	30.2692
DATA	1678	20	63	0	0	A_64_P027229	A_64_P027229	5177.56	327.753	1.245956e+003	1.246342e+002	1205	28	5.932397e+000	0	0	0	0	0	0	1140.98	1	1	49.5074	27.88
DATA	1679	20	64	0	0	A_64_P134277	ENSRNOT00000029167	5203.05	327.523	8.324013e+001	8.887781e+000	138	31	7.318945e+000	0	0	0	0	0	0	75.8744	1	1	55.8519	31.4815
DATA	1680	20	65	0	0	A_64_P165548	XM_001055860	5228.5	327.648	9.096599e+001	9.619855e+000	145	30	6.301341e+000	0	0	0	0	0	0	82.5345	1	1	57.5363	29.5
DATA	1681	20	66	0	0	A_64_P014737	NM_001000069	5253.81	327.57	1.171752e+001	3.355374e+000	68	31.5	6.005345e+000	0	0	0	0	0	0	10.5818	1	0	58.0869	31.7647
DATA	1682	20	67	0	0	A_42_P627330	NM_001106628	5279.12	327.418	7.695534e+002	7.702015e+001	749	33.5	5.694397e+000	0	0	0	0	0	0	691.688	1	1	46.1809	34.1154
DATA	1683	20	68	0	0	A_64_P039452	NM_001109063	5304.61	327.642	3.186048e+002	3.201819e+001	342.5	31	8.284763e+000	0	0	0	0	0	0	285.017	1	1	45.835	31.3611
DATA	1684	20	69	0	0	A_44_P516885	ENSRNOT00000005601	5330.09	327.614	5.705251e+004	5.705252e+003	50696	32	7.910491e+000	0	0	0	0	0	0	50794	1	1	57.259	32.1
DATA	1685	20	70	0	0	A_44_P839176	NM_001107114	5355.41	327.753	2.631047e+003	2.631242e+002	2289	32.5	1.115357e+001	0	0	0	0	0	0	2331.34	1	1	48.5334	33.5714
DATA	1686	20	71	0	0	A_64_P083342	AABR03026150	5380.61	327.931	3.109440e+001	4.475965e+000	87.5	29.5	7.176350e+000	0	0	0	0	0	0	27.4227	1	1	53.8203	28.75
DATA	1687	20	72	0	0	A_42_P618185	NM_001108486	5405.93	327.8	4.560343e+003	4.560458e+002	3900	26.5	7.809363e+000	0	0	0	1	0	0	4002.57	1	1	46.8651	27.1154
DATA	1688	20	73	0	0	A_42_P619957	NM_053830	5431.43	327.884	2.599569e+002	2.619813e+001	274	29.5	6.733003e+000	0	0	0	0	0	0	227.074	1	1	47.2035	29.6667
DATA	1689	20	74	0	0	A_44_P375042	NM_001014243	5457	328	3.627933e+002	3.642605e+001	377	30.5	6.778038e+000	0	0	0	0	0	0	315.396	1	1	54.9904	30.3571
DATA	1690	20	75	0	0	A_44_P438053	NM_001004201	5482.32	327.735	1.135451e+002	1.181924e+001	156	31	7.470372e+000	0	0	0	0	0	0	98.2411	1	1	46.1809	30.5
DATA	1691	20	76	0	0	A_43_P19181	ENSRNOT00000018440	5507.7	327.776	7.911090e+001	8.570657e+000	127.5	32	6.698475e+000	0	0	0	0	0	0	68.1288	1	1	45.835	32
DATA	1692	20	77	0	0	A_42_P664259	NM_024396	5533.5	328	5.456665e+004	5.456666e+003	45967	31	5.735718e+000	0	0	0	0	0	0	46773.4	1	1	54.1152	31.4615
DATA	1693	20	78	0	0	A_44_P588645	FQ230244	5558.72	327.905	1.244302e+002	1.288029e+001	166	26.5	8.624744e+000	0	0	0	0	0	0	106.173	1	1	48.8603	28.6
DATA	1694	20	79	0	0	A_64_P030844	XM_001065657	5584	328	1.847996e+001	3.819372e+000	75	29	7.323405e+000	0	0	0	0	0	0	15.6983	1	1	54.9904	29.9677
DATA	1695	20	80	0	0	A_64_P054823	A_64_P054823	5609.44	328.027	1.357563e+004	1.357567e+003	11265	30.5	5.929368e+000	0	0	0	0	0	0	11481.2	1	1	48.5334	29.25
DATA	1696	20	81	0	0	A_42_P516860	XM_001059330	5634.72	327.957	1.060000e+002	1.112340e+001	148.5	28	8.373918e+000	0	0	0	0	0	0	89.2591	1	1	46.1809	29.2593
DATA	1697	20	82	0	0	A_64_P085772	NM_001191606	5660.22	328	1.218582e+002	1.264757e+001	162	29.5	8.280795e+000	0	0	0	0	0	0	102.179	1	1	46.1809	30.5938
DATA	1698	20	83	66	1	DarkCorner	DarkCorner	5686.1	328.128	3.413666e+000	3.400380e+000	56	27	7.662785e+000	0	0	0	0	0	0	-3.76129	0	0	48.5334	28.4194
DATA	1699	20	84	66	1	DarkCorner	DarkCorner	5711.27	328.104	3.427220e+000	3.413881e+000	59	29	7.823691e+000	0	0	0	0	0	0	-0.479024	0	0	49.1849	29.0833
DATA	1700	20	85	66	1	DarkCorner	DarkCorner	5736.44	328.077	3.638838e+000	3.446243e+000	62	26	6.548121e+000	0	0	0	0	0	0	3.01493	1	0	49.5074	26.2493
DATA	1701	21	1	66	1	DarkCorner	DarkCorner	3590.39	333.921	3.353263e+000	3.119871e+000	64	24	6.853229e+000	0	0	0	0	0	0	3.06959	1	0	49.1849	25.109
DATA	1702	21	2	66	1	DarkCorner	DarkCorner	3616.1	333.512	3.098312e+000	3.086253e+000	57	31.5	5.906530e+000	0	0	0	0	0	0	-3.39531	0	0	50.4627	30.375
DATA	1703	21	3	66	1	DarkCorner	DarkCorner	3640.91	333.938	3.083174e+000	3.071174e+000	57	30	6.298386e+000	0	0	0	0	0	0	-2.45693	0	0	50.7771	30.6757
DATA	1704	21	4	0	0	A_44_P277669	NM_001163736	3666.43	334.239	9.894117e+002	9.898836e+001	963	30	6.907375e+000	0	0	0	0	0	0	919.22	1	1	46.5243	29.6129
DATA	1705	21	5	0	0	A_42_P788480	NM_019194	3692.21	333.907	7.075460e+003	7.075526e+002	6578.5	31	6.795139e+000	0	0	0	0	0	0	6604.36	1	1	48.2044	30
DATA	1706	21	6	0	0	A_42_P558354	NM_001007686	3717.25	334	2.985361e+003	2.985514e+002	2765	26.5	7.204405e+000	0	0	0	1	0	0	2799.14	1	1	49.1849	27.4
DATA	1707	21	7	0	0	A_44_P714409	NM_001047907	3742.63	334	3.560499e+003	3.560627e+002	3327	29.5	7.321780e+000	0	0	0	0	0	0	3353.12	1	1	48.5334	29.1429
DATA	1708	21	8	0	0	A_42_P604331	NM_001108533	3768.5	334	9.521612e+004	9.521613e+003	90129.5	33	7.806054e+000	0	0	0	0	0	0	90060.4	1	1	54.1152	30.9688
DATA	1709	21	9	0	0	A_64_P139472	NM_173119	3793.57	333.827	3.589753e+003	3.589877e+002	3432	30.5	8.308661e+000	0	0	0	0	0	0	3409.09	1	1	49.8279	31.0769
DATA	1710	21	10	0	0	A_42_P711589	NM_022948	3818.84	333.897	8.777286e+003	8.777337e+002	8277.5	29	5.978118e+000	0	0	0	0	0	0	8368.59	1	1	46.5243	29.7407
DATA	1711	21	11	0	0	A_42_P813567	NM_031841	3844.5	334	1.012016e+005	1.012016e+004	97182	33	9.780384e+000	0	0	0	0	0	0	96862.9	1	1	54.1152	33.5484
DATA	1712	21	12	0	0	A_42_P647505	TC640289	3869.85	334.015	3.827890e+003	3.828004e+002	3649	30.5	4.630672e+000	0	0	0	0	0	0	3677.16	1	1	46.8651	31.4643
DATA	1713	21	13	0	0	A_64_P094313	NM_032073	3895.08	334.015	1.003517e+003	1.003950e+002	1048	30.5	7.418338e+000	0	0	0	0	0	0	967.347	1	1	46.8651	29.9286
DATA	1714	21	14	0	0	A_42_P577421	NM_001106819	3920.41	334.092	5.008240e+002	5.016837e+001	541	31	8.364392e+000	0	0	0	0	0	0	484.381	1	1	49.1849	32.9655
DATA	1715	21	15	0	0	A_42_P477311	NM_001013170	3946.07	334.194	1.377585e+004	1.377588e+003	13255.5	29	7.121854e+000	0	0	0	0	0	0	13366.3	1	1	46.8651	28.5185
DATA	1716	21	16	0	0	A_42_P630249	NM_031824	3971.21	334.194	2.597355e+003	2.597518e+002	2487	27.5	7.536959e+000	0	0	0	1	0	0	2527.58	1	1	47.5395	27.7667
DATA	1717	21	17	0	0	A_42_P618256	NM_001024759	3996.68	334.042	7.885712e+002	7.891078e+001	808	29	7.773137e+000	0	0	0	0	0	0	769.538	1	1	47.2035	28.963
DATA	1718	21	18	0	0	A_64_P101584	A_64_P101584	4022.14	333.895	4.478523e+002	4.487916e+001	498	29	7.273846e+000	0	0	0	0	0	0	438.19	1	1	47.8731	28.7037
DATA	1719	21	19	0	0	A_64_P045461	NM_001106750	4047.5	334	2.102410e+002	2.122247e+001	260	30.5	7.225030e+000	0	0	0	0	0	0	206.213	1	1	54.1152	30.1429
DATA	1720	21	20	0	0	A_64_P056485	ENSRNOT00000033663	4073	334	1.380176e+003	1.380478e+002	1408	29	8.502877e+000	0	0	0	0	0	0	1356.83	1	1	46.8651	29.0323
DATA	1721	21	21	0	0	A_64_P013077	A_64_P013077	4098.07	334.267	5.213539e+001	5.957183e+000	111.5	30.5	8.850567e+000	0	0	0	0	0	0	51.3612	1	1	44.0646	31.3056
DATA	1722	21	22	0	0	A_44_P348952	NM_001000368	4124.08	334.597	4.944321e+000	2.918634e+000	64	29	7.744014e+000	0	0	0	0	0	0	4.88063	1	0	43.7019	29.0286
DATA	1723	21	23	0	0	A_64_P147609	NM_001106295	4149.21	334.479	5.897507e+003	5.897577e+002	5803	29	6.408594e+000	0	0	0	0	0	0	5831.38	1	1	48.2044	28.1515
DATA	1724	21	24	0	0	A_44_P193928	NM_183328	4174.46	334.614	1.485025e+003	1.485302e+002	1474	27	6.704815e+000	0	0	0	0	0	0	1470.64	1	1	47.5395	28.2727
DATA	1725	21	25	0	0	A_44_P441947	XM_001079870	4199.88	334.338	1.070857e+003	1.071240e+002	1171	31	7.017922e+000	0	0	0	0	0	0	1061.88	1	1	45.4864	32.4138
DATA	1726	21	26	0	0	A_42_P666259	NM_001009661	4225.09	334.104	1.316742e+004	1.316745e+003	12878	33	6.969639e+000	0	0	0	0	0	0	13071.8	1	1	46.8651	31.1
DATA	1727	21	27	0	0	A_64_P082486	A_64_P082486	4250.63	334.338	1.190606e+003	1.190949e+002	1239	31	9.365721e+000	0	0	0	0	0	0	1183.15	1	1	48.2044	31.3438
DATA	1728	21	28	0	0	A_64_P091940	NM_033237	4276.14	334.217	2.277910e+002	2.295733e+001	293	30	7.307764e+000	0	0	0	0	0	0	226.541	1	1	46.1809	29.8182
DATA	1729	21	29	0	0	A_64_P144899	NM_001107736	4301.56	334.534	7.469346e+002	7.474794e+001	796	28	5.335078e+000	0	0	0	0	0	0	743.305	1	1	49.1849	28.0345
DATA	1730	21	30	0	0	A_44_P410062	XM_224553	4327	334.5	1.899290e+002	1.920585e+001	251	27	6.349353e+000	0	0	0	0	0	0	189.082	1	1	48.5334	27.5429
DATA	1731	21	31	0	0	A_42_P489764	NM_001004099	4352.18	334.361	2.874389e+003	2.874530e+002	2823	28	6.486234e+000	0	0	0	0	0	0	2862.15	1	1	47.8731	28.0741
DATA	1732	21	32	0	0	A_42_P640277	NM_001003401	4377.58	334.427	3.824429e+004	3.824430e+003	37656	31	8.440023e+000	0	0	0	0	0	0	38082.8	1	1	57.5363	31.3448
DATA	1733	21	33	0	0	A_44_P212850	NM_019305	4403.42	334.427	4.277128e+001	5.140732e+000	104	31	6.575783e+000	0	0	0	0	0	0	42.5838	1	1	57.5363	30.2813
DATA	1734	21	34	0	0	A_64_P125506	NM_021677	4428.69	334.51	2.890581e+002	2.904625e+001	365	28	5.958317e+000	0	0	0	0	0	0	287.695	1	1	40.6843	28.3077
DATA	1735	21	35	0	0	A_42_P802358	NM_001024341	4453.75	334.373	1.532586e+004	1.532589e+003	15123	29	7.881648e+000	0	0	0	0	0	0	15245.4	1	1	46.1809	30.25
DATA	1736	21	36	0	0	A_44_P552852	XM_346367	4479.66	334.338	9.621796e+000	3.014184e+000	70	35	8.356184e+000	0	0	0	0	0	0	9.56423	1	0	46.5243	34.6774
DATA	1738	21	38	0	0	A_64_P141187	NM_001108899	4530.33	334.5	1.561341e+001	3.260264e+000	76	28	8.251377e+000	0	0	0	0	0	0	15.4896	1	1	57.5363	30.0909
DATA	1739	21	39	0	0	A_44_P274823	NM_001105831	4555.57	334.608	3.330997e+003	3.331121e+002	3246.5	29	6.948141e+000	0	0	0	0	0	0	3300.5	1	1	49.1849	29.88
DATA	1740	21	40	0	0	A_42_P804913	ENSRNOT00000022886	4580.89	334.5	4.707490e+001	5.513264e+000	110	30	5.921443e+000	0	0	0	0	0	0	46.5765	1	1	56.9804	30.2143
DATA	1741	21	41	0	0	A_64_P113970	NM_212501	4606.06	334.389	3.932054e+003	3.932159e+002	3883	30	7.487501e+000	0	0	0	0	0	0	3884.18	1	1	48.2044	30.7037
DATA	1742	21	42	1028	1	(+)E1A_r60_3	E1A_r60_3	4631.67	334.5	4.235114e+001	5.121315e+000	100	27.5	5.398780e+000	0	0	0	0	0	0	41.7609	1	1	57.5363	27.5357
DATA	1743	21	43	0	0	A_42_P661992	TC596141	4657.33	334.5	1.397638e+002	1.427107e+001	198	29.5	1.062339e+001	0	0	0	1	0	0	137.544	1	1	65	31.8529
DATA	1744	21	44	0	0	A_42_P577431	NM_001109422	4682.5	334.5	1.183744e+002	1.218542e+001	172.5	32.5	1.380842e+001	0	0	0	0	0	0	116.25	1	1	65	36.5
DATA	1745	21	45	0	0	A_44_P524785	NM_001000184	4707.89	334.5	6.750227e+000	2.975472e+000	69	37	5.815397e+000	0	0	0	0	0	0	6.61397	1	0	56.9804	36.4167
DATA	1746	21	46	0	0	A_64_P027634	NM_001000223	4733.06	334.8	5.460236e+001	6.184828e+000	115	29	7.004463e+000	0	0	0	0	0	0	53.3727	1	1	45.835	31
DATA	1747	21	47	0	0	A_42_P492976	NM_001126099	4758.57	334.608	2.710253e+002	2.725857e+001	319	33	8.739241e+000	0	0	0	0	0	0	264.225	1	1	49.1849	33.3214
DATA	1748	21	48	0	0	A_64_P157479	AABR03127998	4784	335.226	1.013400e+004	1.013404e+003	9855	30	9.023493e+000	0	0	0	0	0	0	9853.31	1	1	45.4864	30.4865
DATA	1749	21	49	0	0	A_44_P391706	NM_001007796	4809.29	334.729	1.898481e+002	1.920941e+001	250.5	29.5	9.673240e+000	0	0	0	0	0	0	184.046	1	1	46.8651	32.0938
DATA	1750	21	50	0	0	A_44_P184685	NM_001007735	4834.79	334.956	9.126524e+001	9.587705e+000	147	32	8.049181e+000	0	0	0	0	0	0	88.2084	1	1	46.5243	33.2813
DATA	1751	21	51	0	0	A_44_P475275	NM_001000893	4860.69	334.953	6.380820e+001	7.028640e+000	123	31	6.537113e+000	0	0	0	0	0	0	61.4709	1	1	45.4864	30.5769
DATA	1752	21	52	0	0	A_44_P270056	NM_001007800	4885.58	334.573	1.065715e+002	1.105981e+001	161	32	7.587584e+000	0	0	0	0	0	0	102.329	1	1	57.5363	31.3571
DATA	1753	21	53	0	0	A_64_P059351	NM_001145175	4911.14	334.806	1.190417e+002	1.226843e+001	173	28	8.213332e+000	0	0	0	0	0	0	113.91	1	1	47.5395	28.2
DATA	1754	21	54	0	0	A_42_P573441	NM_001105742	4936.4	334.853	7.235421e+003	7.235482e+002	6852	29.5	7.175336e+000	0	0	0	0	0	0	6898.93	1	1	48.8603	29.3214
DATA	1755	21	55	0	0	A_42_P485589	NM_017246	4961.58	334.573	7.664756e+001	8.226924e+000	134.5	28	7.429168e+000	0	0	0	0	0	0	72.8125	1	1	57.5363	28.9688
DATA	1756	21	56	0	0	A_44_P149540	XM_223051	4987.22	335.132	1.681472e+004	1.681474e+003	15838.5	30.5	7.917390e+000	0	0	0	0	0	0	15913.3	1	1	46.1809	30.0667
DATA	1757	21	57	0	0	A_44_P323236	NM_001000513	5012.58	334.573	1.968724e+001	3.598559e+000	79	28.5	6.106714e+000	0	0	0	0	0	0	18.5574	1	1	57.5363	28.4667
DATA	1759	21	59	0	0	A_64_P100447	NM_001173469	5063.59	334.46	1.243548e+001	3.281825e+000	72	31.5	6.572717e+000	0	0	0	0	0	0	11.626	1	0	44.4243	31.3438
DATA	1760	21	60	0	0	A_64_P150008	A_64_P150008	5088.99	334.897	9.544044e+001	1.001946e+001	146	29.5	7.051942e+000	0	0	0	0	0	0	88.8579	1	1	46.8651	29.1667
DATA	1761	21	61	0	0	A_42_P481696	NM_022508	5114.24	335	2.307943e+003	2.308146e+002	2154	31	8.402732e+000	0	0	0	0	0	0	2139.62	1	1	46.8651	31.0345
DATA	1762	21	62	0	0	A_64_P033755	AABR03073220	5139.78	335	7.134267e+001	7.769258e+000	127.5	30	4.437342e+000	0	0	0	0	0	0	65.8487	1	1	46.1809	29.24
DATA	1763	21	63	0	0	A_64_P115980	NM_001109458	5165.31	335.014	3.196225e+002	3.211127e+001	350	29	5.261164e+000	0	0	0	0	0	0	293.691	1	1	47.2035	28.9565
DATA	1764	21	64	0	0	A_64_P001426	NM_001126301	5190.38	335.116	1.604764e+002	1.634505e+001	213.5	25	7.222650e+000	0	0	0	0	0	0	146.803	1	1	46.5243	28.8
DATA	1765	21	65	0	0	A_64_P012987	NM_001108668	5215.5	335	1.892068e+003	1.892324e+002	1737	30	6.767785e+000	0	0	0	0	0	0	1723	1	1	54.1152	30.3929
DATA	1767	21	67	0	0	A_42_P668289	TC585832	5266.56	334.972	3.957711e+003	3.957836e+002	3525	33	6.291585e+000	0	0	0	0	0	0	3570.53	1	1	48.2044	34.2593
DATA	1768	21	68	0	0	A_64_P052690	ENSRNOT00000036634	5292.01	334.882	6.137068e+002	6.145209e+001	598	30.5	7.394145e+000	0	0	0	0	0	0	551.055	1	1	46.8651	31.6875
DATA	1769	21	69	0	0	A_42_P593020	NM_013413	5317.5	335	5.261148e+001	6.146074e+000	105.5	29.5	7.482961e+000	0	0	0	0	0	0	47.0179	1	1	54.1152	30.0714
DATA	1770	21	70	0	0	A_64_P037303	NM_001127530	5342.5	335	1.351467e+003	1.351844e+002	1191.5	32	1.127297e+001	0	0	0	0	0	0	1202.15	1	1	54.1152	32.8148
DATA	1771	21	71	0	0	A_44_P684180	NM_001037363	5368.24	335	6.952587e+003	6.952661e+002	6001	30.5	8.098913e+000	0	0	0	0	0	0	6154.66	1	1	46.8651	29.875
DATA	1772	21	72	0	0	A_64_P104743	NM_133518	5393.63	335.127	1.591197e+002	1.623504e+001	196	30	1.268779e+001	0	0	0	0	0	0	140.193	1	1	47.5395	32.5
DATA	1773	21	73	0	0	A_44_P941132	NM_001108128	5418.72	334.905	6.276287e+003	6.276370e+002	5326	29	6.118823e+000	0	0	0	0	0	0	5503.61	1	1	48.8603	29.24
DATA	1774	21	74	0	0	A_44_P187080	NM_001110823	5444.44	334.973	2.680219e+004	2.680221e+003	22417	29	5.891236e+000	0	0	0	0	0	0	23390.5	1	1	48.5334	29.96
DATA	1775	21	75	0	0	A_42_P574960	ENSRNOT00000068719	5469.7	335.1	6.681309e+002	6.689300e+001	643	29	6.701950e+000	0	0	0	0	0	0	580.375	1	1	47.2035	30.129
DATA	1776	21	76	0	0	A_64_P094850	A_64_P094850	5495.31	335.103	7.750268e+001	8.417385e+000	126	32	7.674168e+000	0	0	0	0	0	0	67.0067	1	1	45.835	31.3214
DATA	1777	21	77	0	0	A_43_P13418	NM_172042	5520.53	335.216	8.746945e+003	8.747007e+002	7464.5	32	6.000950e+000	0	0	0	0	0	0	7527.91	1	1	48.8603	31.6296
DATA	1778	21	78	66	-1	(-)3xSLv1	NegativeControl	5545.91	335.386	3.327117e+000	3.314168e+000	54	31.5	1.010770e+001	0	0	0	0	0	0	-6.58542	0	0	57.259	31.2
DATA	1779	21	79	0	0	A_44_P321594	ENSRNOT00000006966	5571.4	335.494	4.273646e+001	5.417281e+000	94	25	7.432945e+000	0	0	0	0	0	0	36.45	1	1	49.8279	26.7143
DATA	1780	21	80	0	0	A_44_P792531	NM_001025700	5596.57	335.392	1.910552e+002	1.939593e+001	217.5	31	6.806099e+000	0	0	0	0	0	0	162.234	1	1	49.1849	31.5667
DATA	1781	21	81	0	0	A_43_P14795	NM_001044248	5621.97	335.081	1.583740e+003	1.584096e+002	1357	28	7.173466e+000	0	0	0	0	0	0	1338.9	1	1	46.8651	29.3
DATA	1782	21	82	0	0	A_42_P671502	NM_053467	5647.44	334.973	6.692699e+003	6.692784e+002	5471	30	9.011487e+000	0	0	0	0	0	0	5633.83	1	1	48.5334	30.2759
DATA	1783	21	83	66	1	DarkCorner	DarkCorner	5672.66	335.571	3.399647e+000	3.386416e+000	55	27	5.711237e+000	0	0	0	0	0	0	-6.01749	0	0	49.8279	28.7586
DATA	1784	21	84	66	1	DarkCorner	DarkCorner	5698.61	335.27	3.413895e+000	3.400607e+000	56	28	9.179750e+000	0	0	0	0	0	0	-3.64262	0	0	48.5334	28.037
DATA	1785	21	85	66	1	DarkCorner	DarkCorner	5723.58	335.427	3.426816e+000	3.413479e+000	56	29.5	5.848619e+000	0	0	0	0	0	0	-3.37994	0	0	57.5363	29.2778
DATA	1786	22	1	66	1	DarkCorner	DarkCorner	3603.42	341.427	3.101155e+000	3.089085e+000	58	29	6.322337e+000	0	0	0	0	0	0	-1.96463	0	0	57.5363	29.3171
DATA	1787	22	2	66	1	DarkCorner	DarkCorner	3628.58	341.25	3.086110e+000	3.074099e+000	58	30	5.786153e+000	0	0	0	0	0	0	-1.36487	0	0	49.5074	29.7097
DATA	1788	22	3	66	1	DarkCorner	DarkCorner	3654.46	341.526	3.070813e+000	3.058862e+000	53	30	6.609357e+000	0	0	0	0	0	0	-7.98957	0	0	49.5074	28.7941
DATA	1789	22	4	0	0	A_42_P704824	NM_001009640	3679.45	341.378	2.171520e+002	2.192763e+001	256.5	26	6.950927e+000	0	0	0	1	0	0	202.5	1	1	49.1849	28.3462
DATA	1790	22	5	0	0	A_42_P517554	NM_001107060	3704.58	341.427	1.458020e+002	1.489193e+001	191	27	8.513248e+000	0	0	0	1	0	0	136.582	1	1	57.5363	28.3462
DATA	1791	22	6	0	0	A_42_P586883	NM_001106416	3730.42	341.427	5.796556e+001	6.534896e+000	114	29	9.458682e+000	0	0	0	0	0	0	54.5457	1	1	57.5363	30
DATA	1792	22	7	0	0	A_64_P060302	BF559343	3755.58	341.427	2.979860e+002	2.994969e+001	342	29	6.335256e+000	0	0	0	0	0	0	281.602	1	1	57.5363	29.2759
DATA	1793	22	8	0	0	A_64_P055418	NM_001025641	3781	341.455	5.675304e+001	6.415751e+000	111	29	9.661739e+000	0	0	0	0	0	0	53.8562	1	1	55.8519	30.6429
DATA	1794	22	9	0	0	A_44_P317600	NM_012612	3806.5	341.5	3.665965e+002	3.678058e+001	415.5	29	6.828202e+000	0	0	0	0	0	0	349.289	1	1	57.5363	30.4286
DATA	1795	22	10	0	0	A_44_P433359	NM_022710	3831.39	341.2	3.672823e+002	3.684803e+001	413.5	31	1.012960e+001	0	0	0	0	0	0	351.251	1	1	49.1849	31.5
DATA	1796	22	11	0	0	A_42_P788480	NM_019194	3857.14	341.278	6.783331e+003	6.783395e+002	6535	32	1.021066e+001	0	0	0	0	0	0	6511.71	1	1	47.8731	33.8485
DATA	1797	22	12	0	0	A_44_P269808	NM_001025281	3882.58	341.427	8.028868e+001	8.552733e+000	136.5	30	6.988026e+000	0	0	0	0	0	0	77.3494	1	1	65	31.7586
DATA	1798	22	13	0	0	A_64_P108165	NM_001108889	3908	341.455	3.035198e+001	4.223782e+000	91	31	7.827375e+000	0	0	0	0	0	0	29.34	1	1	55.8519	30.963
DATA	1799	22	14	0	0	A_42_P581567	NM_001011899	3933.5	341.5	1.228018e+002	1.262439e+001	182	32	7.787669e+000	0	0	0	0	0	0	119.092	1	1	57.5363	33.8276
DATA	1800	22	15	0	0	A_42_P746029	NM_144748	3958.67	341.5	2.673798e+001	3.958528e+000	85	28	8.101374e+000	0	0	0	0	0	0	26.0085	1	1	65	28.0323
DATA	1801	22	16	0	0	A_42_P481087	XM_232226	3983.94	341.618	1.345560e+003	1.345875e+002	1336	30	7.278080e+000	0	0	0	0	0	0	1312.62	1	1	46.1809	29.5517
DATA	1802	22	17	0	0	A_64_P031020	ENSRNOT00000032728	4009.53	341.143	2.914264e+000	2.902922e+000	58	30	9.296484e+000	0	0	0	0	0	0	-0.858546	0	0	47.5395	31.2308
DATA	1803	22	18	0	0	A_44_P344228	NM_183051	4034.95	341.523	3.835029e+001	4.805319e+000	99	29	7.193484e+000	0	0	0	0	0	0	37.6078	1	1	55.8519	29.0606
DATA	1804	22	19	0	0	A_64_P009798	NM_021742	4060.15	341.417	2.900042e+000	2.888755e+000	59	29	8.087662e+000	0	0	0	0	0	0	-0.23126	0	0	42.9674	28.4063
DATA	1805	22	20	0	0	A_44_P775747	ENSRNOT00000051510	4085.66	341.388	2.453054e+004	2.453056e+003	25045.5	30	9.099766e+000	0	0	0	0	0	0	24163.8	1	1	45.835	28.4333
DATA	1806	22	21	0	0	A_44_P349475	NM_031333	4111.19	341.608	9.170804e+002	9.175315e+001	940	30	8.605433e+000	0	0	0	0	0	0	905.201	1	1	49.1849	29.6471
DATA	1807	22	22	0	0	A_64_P114198	NM_001080153	4136.36	341.87	2.158711e+003	2.158902e+002	2145	29	9.333874e+000	0	0	0	0	0	0	2134.62	1	1	46.8651	29.9394
DATA	1808	22	23	0	0	A_42_P719060	NM_001108994	4161.89	341.943	3.800045e+003	3.800153e+002	3722.5	27	7.022717e+000	0	0	0	0	0	0	3763.79	1	1	46.8651	27.3125
DATA	1809	22	24	0	0	A_44_P163243	NM_175759	4187.42	341.573	1.519031e+001	3.240804e+000	75	31	5.256670e+000	0	0	0	0	0	0	15.0664	1	1	57.5363	30.8485
DATA	1810	22	25	0	0	A_44_P156864	A_44_P156864	4212.58	341.573	1.112618e+002	1.148769e+001	170	33	8.177518e+000	0	0	0	0	0	0	110.49	1	1	57.5363	33.2222
DATA	1811	22	26	0	0	A_42_P758052	NM_001031645	4237.88	341.5	5.623215e+003	5.623287e+002	5500	34	7.780732e+000	0	0	0	0	0	0	5590.06	1	1	44.4243	31.8387
DATA	1812	22	27	0	0	A_44_P280659	NM_001100971	4263.57	341.681	5.770662e+001	6.437695e+000	120	29	5.469355e+000	0	0	0	0	0	0	57.4182	1	1	46.8651	29.0769
DATA	1813	22	28	0	0	A_42_P768380	NM_001100158	4288.74	341.652	6.880396e+003	6.880455e+002	6674	30	6.800909e+000	0	0	0	0	0	0	6850.61	1	1	47.2035	31.5641
DATA	1814	22	29	0	0	A_44_P486312	NM_144737	4314.18	341.667	2.423391e+002	2.440095e+001	304	30	6.253648e+000	0	0	0	0	0	0	241.41	1	1	47.5395	29.9459
DATA	1815	22	30	0	0	A_64_P005288	XM_575125	4339.77	341.892	4.120349e+001	5.009607e+000	100.5	28	5.625198e+000	0	0	0	0	0	0	41.0593	1	1	45.835	28
DATA	1816	22	31	0	0	A_64_P101885	ENSRNOT00000058341	4365.09	341.614	1.753560e+002	1.776555e+001	236	28.5	7.690770e+000	0	0	0	0	0	0	174.758	1	1	65	29.9412
DATA	1817	22	32	0	0	A_64_P113645	ENSRNOT00000055538	4390.5	341.648	3.322429e+000	2.868605e+000	66	29.5	6.239065e+000	0	0	0	0	0	0	3.31088	1	0	57.5363	29.5
DATA	1818	22	33	0	0	A_42_P588869	NM_001008348	4415.68	341.453	3.517542e+003	3.517657e+002	3482	28.5	6.894876e+000	0	0	0	0	0	0	3504.36	1	1	49.1849	29.5938
DATA	1819	22	34	0	0	A_64_P028027	NM_001000473	4441.42	341.573	3.390750e+001	4.430252e+000	94.5	28	6.717707e+000	0	0	0	0	0	0	33.7658	1	1	57.5363	27.9
DATA	1820	22	35	0	0	A_42_P468805	NM_145721	4466.32	341.824	3.954534e+002	3.964811e+001	452.5	29	7.280978e+000	0	0	0	0	0	0	393.572	1	1	46.1809	31.2333
DATA	1821	22	36	0	0	A_42_P522194	NM_012914	4491.84	341.897	1.898229e+002	1.919583e+001	243	29	6.588648e+000	0	0	0	0	0	0	188.769	1	1	46.5243	30.4063
DATA	1822	22	37	0	0	A_64_P002969	A_64_P002969	4517.5	342	7.547911e+000	2.956048e+000	67.5	26	6.813491e+000	0	0	0	0	0	0	7.49862	1	0	54.1152	27.9032
DATA	1823	22	38	0	0	A_42_P453935	NM_001198580	4542.38	342	4.894883e+003	4.894967e+002	4801	30	7.262216e+000	0	0	0	0	0	0	4857.37	1	1	48.5334	29.8387
DATA	1824	22	39	0	0	A_42_P523551	NM_001014087	4568.53	341.905	2.876504e+000	2.865309e+000	55.5	26	6.178453e+000	0	0	0	0	0	0	-3.8368	0	0	48.5334	27.6071
DATA	1825	22	40	0	0	A_64_P046076	NM_053952	4593.38	342	2.084861e+003	2.085059e+002	2036	28	4.604346e+000	0	0	0	0	0	0	2062.96	1	1	48.5334	28
DATA	1826	22	41	0	0	A_42_P607770	NM_001134616	4618.79	341.806	1.193765e+004	1.193768e+003	11200	30.5	5.854166e+000	0	0	0	0	0	0	11792.1	1	1	47.5395	30.7333
DATA	1827	22	42	0	0	A_64_P089400	NM_022605	4644	341.797	4.182576e+002	4.192478e+001	469.5	28.5	6.759690e+000	0	0	0	0	0	0	412.395	1	1	46.8651	28.9412
DATA	1828	22	43	0	0	A_64_P072064	FQ221714	4669.5	342	1.045252e+005	1.045252e+004	103086	37	1.290603e+001	0	0	0	0	0	0	102853	1	1	54.1152	36.9677
DATA	1829	22	44	0	0	A_42_P555125	NM_012913	4695	341.797	7.816188e+003	7.816242e+002	7377	37	6.588646e+000	0	0	0	0	0	0	7674.07	1	1	46.8651	36.4444
DATA	1830	22	45	0	0	A_42_P768776	NM_001108443	4720.38	342	6.211179e+003	6.211247e+002	5959	34	7.108640e+000	0	0	0	0	0	0	6084.09	1	1	48.5334	33.0741
DATA	1831	22	46	0	0	A_42_P593930	NM_001195606	4746	342	8.692828e+000	3.033285e+000	66	28	8.667905e+000	0	0	0	0	0	0	8.49342	1	0	54.9904	30.8485
DATA	1832	22	47	0	0	A_64_P013545	NM_001115046	4771.41	341.908	2.276348e+002	2.294922e+001	281	32.5	9.432058e+000	0	0	0	0	0	0	221.819	1	1	49.1849	31.0625
DATA	1833	22	48	0	0	A_42_P548520	NM_001100834	4796.76	342	5.376180e+003	5.376260e+002	5206	32	8.352310e+000	0	0	0	0	0	0	5224.19	1	1	46.8651	31.7586
DATA	1834	22	49	0	0	A_42_P692317	NM_001107565	4821.84	341.897	1.099582e+003	1.099973e+002	1119	33	6.837908e+000	0	0	0	0	0	0	1065.36	1	1	46.5243	34.0968
DATA	1835	22	50	0	0	A_64_P078303	NM_001106526	4847.49	341.892	3.241044e+001	4.375696e+000	92	32	6.820685e+000	0	0	0	0	0	0	31.3036	1	1	45.1352	30.5
DATA	1836	22	51	0	0	A_64_P031771	A_64_P031771	4872.91	342.065	3.719338e+001	4.746749e+000	95	30.5	8.219395e+000	0	0	0	0	0	0	35.8078	1	1	54.4085	30.0385
DATA	1837	22	52	0	0	A_44_P393929	NM_001039713	4898.31	342.014	8.103720e+001	8.627131e+000	137	28.5	7.500423e+000	0	0	0	0	0	0	77.7553	1	1	47.2035	27.9722
DATA	1838	22	53	0	0	A_44_P135730	XM_228802	4923.85	342.243	1.628624e+002	1.655475e+001	219	31	8.146428e+000	0	0	0	0	0	0	155.723	1	1	48.2044	30.4167
DATA	1839	22	54	0	0	A_43_P23215	NM_001025737	4949.01	342.412	1.226042e+002	1.261742e+001	179	29.5	9.681377e+000	0	0	0	0	0	0	116.812	1	1	45.835	31.7059
DATA	1840	22	55	0	0	A_64_P118427	A_64_P118427	4974.53	342.301	9.749697e+001	1.019830e+001	153	28	7.191950e+000	0	0	0	0	0	0	92.5415	1	1	48.5334	29
DATA	1841	22	56	0	0	A_64_P075560	NM_001037526	5000	342.455	1.709480e+001	3.455428e+000	77	29	7.538613e+000	0	0	0	0	0	0	16.1638	1	1	55.8519	28.6429
DATA	1842	22	57	0	0	A_64_P150311	NM_177935	5025.64	341.889	4.777139e+001	5.649120e+000	107	28	5.849599e+000	0	0	0	0	0	0	44.9859	1	1	48.2044	27.9697
DATA	1843	22	58	0	0	A_44_P272393	NM_001106892	5051.12	341.788	2.408212e+001	3.868539e+000	82	32	9.797766e+000	0	0	0	0	0	0	22.5854	1	1	45.835	33.6061
DATA	1844	22	59	0	0	A_44_P421887	NM_001191565	5076	341.774	1.556704e+002	1.586108e+001	206	29	7.937849e+000	0	0	0	0	0	0	145.403	1	1	45.4864	30.2051
DATA	1845	22	60	0	0	A_64_P045102	A_64_P045102	5101.57	341.951	2.583522e+003	2.583702e+002	2533	29.5	6.938505e+000	0	0	0	0	0	0	2402.9	1	1	43.7019	29.0714
DATA	1846	22	61	0	0	A_42_P818546	NM_001191600	5126.73	342.155	8.435998e+002	8.441567e+001	833.5	29	6.488186e+000	0	0	0	0	0	0	781.298	1	1	47.5395	28.2
DATA	1847	22	62	0	0	A_42_P777445	ENSRNOT00000012684	5152.38	342.312	6.370637e+001	7.075839e+000	120	31	5.792924e+000	0	0	0	0	0	0	58.7418	1	1	50.1463	31.0833
DATA	1848	22	63	0	0	A_64_P111709	NM_001000554	5177.53	342.432	2.164812e+002	2.186795e+001	256	25.5	4.259973e+000	0	0	0	0	0	0	198.735	1	1	49.1849	27.6
DATA	1849	22	64	0	0	A_64_P107509	NM_001191874	5202.08	342.69	4.860679e+001	5.768495e+000	106.5	29.5	6.432729e+000	0	0	0	0	0	0	44.4298	1	1	61.8039	30.5
DATA	1850	22	65	0	0	A_64_P121836	ENSRNOT00000007828	5228.5	342.5	3.101057e+001	4.399860e+000	88.5	32	7.404953e+000	0	0	0	0	0	0	28.2102	1	1	57.5363	32.6
DATA	1851	22	66	0	0	A_42_P684281	XR_008784	5253.73	342.137	1.922545e+003	1.922801e+002	1768.5	36	8.747836e+000	0	0	0	0	0	0	1740.82	1	1	48.2044	35.8966
DATA	1852	22	67	0	0	A_64_P060804	ENSRNOT00000000462	5279.42	342.427	4.788739e+001	5.732134e+000	102.5	33	8.534182e+000	0	0	0	0	0	0	43.1593	1	1	57.5363	35.0323
DATA	1853	22	68	0	0	A_64_P075675	A_64_P075675	5304.58	342.427	3.300823e+002	3.315963e+001	354	29	6.282943e+000	0	0	0	0	0	0	296.114	1	1	57.5363	28.7586
DATA	1854	22	69	0	0	A_44_P254973	NM_198051	5330	342.122	5.006353e+001	5.931067e+000	103.5	30	8.495793e+000	0	0	0	0	0	0	44.6978	1	1	46.8651	30.3871
DATA	1855	22	70	0	0	A_42_P492976	NM_001126099	5355.36	342.1	2.679326e+002	2.698312e+001	288	32	8.060390e+000	0	0	0	0	0	0	238.089	1	1	50.1463	31.6452
DATA	1856	22	71	0	0	A_42_P619114	NM_001014204	5380.67	342.5	4.333255e+001	5.392774e+000	99	30	7.583234e+000	0	0	0	0	0	0	38.3282	1	1	57.5363	29.875
DATA	1857	22	72	0	0	A_42_P541625	NM_001126090	5406.05	342.392	2.716563e+004	2.716565e+003	23723.5	28	6.387086e+000	0	0	0	1	0	0	23914.6	1	1	49.1849	28.7778
DATA	1858	22	73	0	0	A_42_P469136	NM_001044288	5431.5	342.5	1.132674e+003	1.133138e+002	1017	27.5	6.109235e+000	0	0	0	1	0	0	992.453	1	1	57.5363	27.7143
DATA	1859	22	74	0	0	A_64_P101480	ENSRNOT00000034261	5457	342.545	7.083594e+001	7.796002e+000	120	32	7.050150e+000	0	0	0	0	0	0	61.7759	1	1	65	30.7692
DATA	1860	22	75	0	0	A_64_P078554	ENSRNOT00000020079	5482.57	342.506	3.798597e+002	3.812655e+001	398.5	30	7.257219e+000	0	0	0	0	0	0	329.724	1	1	51.7088	30.7429
DATA	1861	22	76	0	0	A_44_P131067	ENSRNOT00000045483	5508.19	342.1	1.444661e+001	3.590179e+000	71	32	7.822224e+000	0	0	0	0	0	0	12.4805	1	0	46.8651	31.4828
DATA	1862	22	77	0	0	A_64_P055699	ENSRNOT00000010871	5533.25	342.373	1.668982e+003	1.669309e+002	1464	32.5	9.322190e+000	0	0	0	0	0	0	1435.46	1	1	49.1849	31.75
DATA	1863	22	78	0	0	A_64_P117203	NM_001106002	5558.51	342.64	1.695787e+004	1.695790e+003	13918	28	8.734775e+000	0	0	0	0	0	0	14520.9	1	1	49.8279	29
DATA	1864	22	79	0	0	A_44_P357870	NM_031559	5584	342.545	3.000867e+002	3.019295e+001	303.5	28	6.980893e+000	0	0	0	1	0	0	255.816	1	1	55.8519	29.9063
DATA	1865	22	80	0	0	A_42_P732101	NM_022624	5609.38	342.295	9.613301e+003	9.613359e+002	7905	28.5	5.148373e+000	0	0	0	0	0	0	8159.05	1	1	50.4627	29.3333
DATA	1866	22	81	0	0	A_64_P155054	XM_001062835	5634.7	342.313	7.519163e+001	8.235615e+000	125.5	30	9.300249e+000	0	0	0	0	0	0	63.5471	1	1	46.1809	32.1935
DATA	1867	22	82	0	0	A_44_P534154	NM_001108852	5660.24	342.486	5.579882e+001	6.520452e+000	107	29	9.140034e+000	0	0	0	0	0	0	46.9631	1	1	47.2035	29.3333
DATA	1868	22	83	66	1	DarkCorner	DarkCorner	5685.46	342.305	3.400554e+000	3.387318e+000	51	27	8.012065e+000	0	0	0	0	0	0	-6.92035	0	0	51.4001	27.4545
DATA	1869	22	84	66	1	DarkCorner	DarkCorner	5711.37	342.423	3.414044e+000	3.400756e+000	58	29.5	8.430173e+000	0	0	0	0	0	0	-0.754756	0	0	49.8279	28.6333
DATA	1870	22	85	66	1	DarkCorner	DarkCorner	5736.42	342.573	4.137240e+000	3.438278e+000	59.5	27	6.528550e+000	0	0	0	0	0	0	3.44162	1	0	57.5363	26.891
DATA	1871	23	1	66	1	DarkCorner	DarkCorner	3590.5	348.5	7.495883e+000	3.182132e+000	64	26	6.776359e+000	0	0	0	0	0	0	6.8822	1	0	57.5363	26.1601
DATA	1872	23	2	66	1	DarkCorner	DarkCorner	3616.15	348.476	3.089162e+000	3.077139e+000	56	32	8.082683e+000	0	0	0	0	0	0	-3.23619	0	0	51.0895	31.0588
DATA	1873	23	3	66	1	DarkCorner	DarkCorner	3641.56	348.575	3.074166e+000	3.062201e+000	55	30	6.242857e+000	0	0	0	0	0	0	-5.59685	0	0	50.1463	29.7647
DATA	1874	23	4	0	0	A_44_P246268	NM_001106862	3666.62	348.936	2.282944e+001	3.807972e+000	81	30	7.090604e+000	0	0	0	0	0	0	21.2687	1	1	44.0646	28.88
DATA	1875	23	5	0	0	A_64_P028396	ENSRNOT00000051835	3692.26	348.616	4.241699e+001	5.214983e+000	97.5	30	8.352163e+000	0	0	0	0	0	0	39.6987	1	1	48.5334	30.4828
DATA	1876	23	6	0	0	A_64_P020451	XM_219275	3717.45	349	2.963899e+001	4.231582e+000	85	29.5	9.028179e+000	0	0	0	0	0	0	27.8647	1	1	45.835	29.3529
DATA	1878	23	8	0	0	A_64_P106264	ENSRNOT00000029671	3768.42	348.573	1.706697e+003	1.706959e+002	1733	27	8.121491e+000	0	0	0	0	0	0	1618.19	1	1	57.5363	29.2
DATA	1879	23	9	0	0	A_44_P524805	NM_214832	3793.58	348.573	2.633224e+001	3.978735e+000	82	29	8.633020e+000	0	0	0	0	0	0	25.0671	1	1	57.5363	30.9355
DATA	1880	23	10	0	0	A_42_P764228	NM_031707	3819	348.657	5.861720e+003	5.861795e+002	5596	33	7.962877e+000	0	0	0	0	0	0	5602.01	1	1	45.4864	32
DATA	1881	23	11	0	0	A_44_P533760	NM_182843	3844.25	348.627	1.209197e+003	1.209560e+002	1163	29	1.126273e+001	0	0	0	0	0	0	1159.93	1	1	46.1809	30.8148
DATA	1882	23	12	0	0	A_42_P524610	NM_001108992	3869.75	348.794	2.849575e+003	2.849727e+002	2759	29	7.357098e+000	0	0	0	0	0	0	2743.43	1	1	46.1809	30.4242
DATA	1883	23	13	0	0	A_42_P570756	NM_134345	3895.42	348.573	1.227364e+005	1.227364e+004	119629	31	8.168062e+000	0	0	0	0	0	0	118572	1	1	57.5363	32.8
DATA	1884	23	14	0	0	A_44_P362969	NM_053688	3920.5	348.691	4.019833e+001	4.974092e+000	101	33	7.454976e+000	0	0	0	0	0	0	38.9606	1	1	46.5243	33.92
DATA	1885	23	15	0	0	A_44_P308197	NM_001012190	3945.89	348.88	3.472356e+003	3.472479e+002	3365	28	8.357982e+000	0	0	0	0	0	0	3376	1	1	47.8731	27.7568
DATA	1886	23	16	0	1	ETG05_36762	ETG05_36762	3971.68	348.794	4.615645e+001	5.457344e+000	105	28.5	6.937202e+000	0	0	0	0	0	0	45.0091	1	1	46.5243	28.7647
DATA	1887	23	17	0	0	A_42_P744033	NM_001100846	3996.81	348.57	2.622288e+002	2.638318e+001	311	32	1.162471e+001	0	0	0	0	0	0	256.404	1	1	58.0869	34.4231
DATA	1888	23	18	0	0	A_42_P726363	NM_031536	4022.42	348.573	2.599383e+001	3.891716e+000	84.5	30	8.568119e+000	0	0	0	0	0	0	25.483	1	1	65	30.7353
DATA	1889	23	19	0	0	A_64_P010393	NM_053363	4047.46	348.746	4.632381e+003	4.632471e+002	4463	28	6.782196e+000	0	0	0	0	0	0	4552.28	1	1	47.5395	27.5417
DATA	1890	23	20	0	0	A_42_P612220	NM_001191711	4073.09	348.614	8.983490e+002	8.988115e+001	935	29	8.654750e+000	0	0	0	0	0	0	884.797	1	1	57.259	28.4737
DATA	1891	23	21	0	0	A_44_P393551	NM_012567	4098.5	348.648	3.384708e+004	3.384709e+003	33458	31.5	1.133928e+001	0	0	0	0	0	0	33405.4	1	1	57.5363	32.2
DATA	1892	23	22	0	0	A_44_P278688	NM_053682	4123.63	349.265	1.645022e+003	1.645272e+002	1647	30.5	8.470435e+000	0	0	0	0	0	0	1626.7	1	1	46.5243	30.9
DATA	1893	23	23	0	0	A_44_P186989	NM_001000076	4149.44	349.041	1.784853e+001	3.376774e+000	78	27	7.244499e+000	0	0	0	0	0	0	17.6797	1	1	48.5334	28
DATA	1894	23	24	0	0	A_42_P640277	NM_001003401	4174.5	349	3.787558e+004	3.787559e+003	37186.5	32	6.118249e+000	0	0	0	0	0	0	37573.1	1	1	54.1152	31.7083
DATA	1895	23	25	0	0	A_44_P398792	NM_053867	4200.06	348.976	1.214024e+004	1.214027e+003	12133.5	31	6.070467e+000	0	0	0	0	0	0	12059.3	1	1	50.7771	30.3333
DATA	1896	23	26	0	0	A_64_P052552	ENSRNOT00000056797	4225.52	348.855	1.241313e+002	1.273727e+001	182	32	7.867602e+000	0	0	0	0	0	0	123.443	1	1	47.2035	31.4286
DATA	1897	23	27	0	0	A_64_P119254	NM_001013202	4250.47	349.067	2.863615e+000	2.853537e+000	61	30	7.849229e+000	0	0	0	0	0	0	0.776894	0	0	43.7019	29.9091
DATA	1898	23	28	0	0	A_64_P159614	NM_053614	4276	349	4.685699e+003	4.685786e+002	4725	27	7.066538e+000	0	0	0	0	0	0	4667.8	1	1	46.8651	28.3103
DATA	1899	23	29	0	0	A_42_P814107	NM_001024750	4301.57	349.097	1.745282e+002	1.768376e+001	238	31.5	7.920300e+000	0	0	0	0	0	0	173.965	1	1	48.2044	31.8421
DATA	1900	23	30	0	0	A_64_P150751	NM_212494	4326.94	349.099	4.255051e+002	4.264568e+001	478.5	28	5.440271e+000	0	0	0	0	0	0	424.301	1	1	46.8651	28.3
DATA	1902	23	32	0	0	A_44_P838888	ENSRNOT00000038829	4377.76	349.167	6.356543e+001	6.964896e+000	121	28	7.080640e+000	0	0	0	0	0	0	63.4006	1	1	45.835	29.2759
DATA	1903	23	33	0	0	A_43_P12927	NM_053769	4403.24	349	3.018232e+002	3.031633e+001	363	31	5.561877e+000	0	0	0	0	0	0	300.986	1	1	46.8651	30.3704
DATA	1904	23	34	0	0	A_64_P140806	A_64_P140806	4428.5	349	3.461327e+004	3.461328e+003	34459	29	8.042972e+000	0	0	0	0	0	0	34505.3	1	1	54.1152	30.2424
DATA	1905	23	35	0	0	A_42_P607026	NM_001106839	4454.03	349	7.611429e+003	7.611483e+002	7373	27	6.592652e+000	0	0	0	0	0	0	7583.64	1	1	46.8651	28.9655
DATA	1906	23	36	0	0	A_44_P272186	NM_001107950	4479.5	349	2.988199e+001	4.130656e+000	91	30.5	7.735288e+000	0	0	0	0	0	0	29.7516	1	1	54.1152	31.8125
DATA	1907	23	37	0	0	A_44_P226658	NM_017046	4504.73	349.3	4.073429e+001	4.973906e+000	103.5	28	7.760390e+000	0	0	0	0	0	0	40.5219	1	1	46.8651	29.0968
DATA	1908	23	38	0	0	A_64_P119279	NM_001108109	4529.94	349.235	1.733400e+004	1.733403e+003	17509.5	32	7.528674e+000	0	0	0	0	0	0	17225.1	1	1	46.1809	31.5294
DATA	1909	23	39	0	0	A_44_P1042876	NM_212504	4555.43	349.284	2.354198e+003	2.354372e+002	2274	27.5	6.746265e+000	0	0	0	0	0	0	2336.49	1	1	46.5243	28.1875
DATA	1910	23	40	0	0	A_64_P119607	ENSRNOT00000037601	4580.97	349.122	2.027178e+002	2.047324e+001	259.5	28	6.552440e+000	0	0	0	0	0	0	200.902	1	1	46.8651	29.3704
DATA	1911	23	41	0	0	A_42_P784252	NM_133557	4606.09	348.672	1.492472e+004	1.492474e+003	14495.5	30.5	5.356473e+000	0	0	0	0	0	0	14766.9	1	1	45.1352	30.8929
DATA	1912	23	42	0	0	A_44_P1033194	NM_139328	4631.5	348.935	4.946861e+003	4.946945e+002	4841	29	3.754433e+000	0	0	0	0	0	0	4886.06	1	1	43.7019	28.9688
DATA	1913	23	43	0	0	A_42_P800048	NM_207610	4657.15	349.029	7.234889e+003	7.234946e+002	6985	32	9.944583e+000	0	0	0	0	0	0	7132.08	1	1	46.8651	32
DATA	1914	23	44	0	0	A_43_P11525	NM_012710	4682.5	349.352	5.516134e+001	6.225612e+000	119.5	37	1.184692e+001	0	0	0	0	0	0	54.2656	1	1	65	37.3429
DATA	1915	23	45	0	0	A_64_P019037	NM_001013886	4707.91	349.386	4.841178e+004	4.841179e+003	47021.5	37.5	5.750891e+000	0	0	0	0	0	0	47518.2	1	1	57.259	36.9643
DATA	1916	23	46	0	0	A_64_P003378	NM_001024336	4733.35	349.318	2.999741e+002	3.013725e+001	371	28	5.697636e+000	0	0	0	0	0	0	293.722	1	1	45.835	28.9655
DATA	1917	23	47	0	0	A_44_P258855	NM_053431	4758.74	349.222	6.776569e+003	6.776632e+002	6415.5	31.5	8.967117e+000	0	0	0	0	0	0	6618.19	1	1	47.5395	31.0667
DATA	1918	23	48	0	1	ETG09_35454	ETG09_35454	4784.11	349.5	5.947552e+000	2.975224e+000	65	29.5	8.359957e+000	0	0	0	0	0	0	5.79295	1	0	56.9804	29.5
DATA	1919	23	49	0	0	A_64_P089677	NM_001105977	4809.42	349.427	1.108844e+002	1.146737e+001	170	34	5.567409e+000	0	0	0	0	0	0	107.692	1	1	57.5363	34.2174
DATA	1920	23	50	0	0	A_64_P013609	A_64_P013609	4834.67	349.224	1.309098e+001	3.211347e+000	72	32	8.523639e+000	0	0	0	0	0	0	12.6757	1	0	45.835	34.037
DATA	1921	23	51	0	0	A_44_P357470	NM_030849	4860	348.774	9.866273e+002	9.870658e+001	987	29.5	9.055385e+000	0	0	0	0	0	0	952.278	1	1	45.4864	30
DATA	1922	23	52	0	0	A_44_P404064	ENSRNOT00000015387	4885.22	348.917	1.336660e+003	1.336986e+002	1355	31	7.401395e+000	0	0	0	0	0	0	1285.94	1	1	44.7812	30.2258
DATA	1923	23	53	0	0	A_64_P092167	A_64_P092167	4911.31	349.662	3.145866e+001	4.320503e+000	90	28	7.316703e+000	0	0	0	0	0	0	30.162	1	1	48.2044	29.0789
DATA	1924	23	54	0	0	A_42_P463036	ENSRNOT00000038596	4936.5	349.5	5.312641e+003	5.312724e+002	4945	28	9.791755e+000	0	0	0	1	0	0	5075.69	1	1	49.1849	28.9615
DATA	1925	23	55	0	0	A_44_P1003794	NM_012576	4961.76	349.686	1.590402e+003	1.590682e+002	1540.5	28	7.417761e+000	0	0	0	0	0	0	1513.99	1	1	47.2035	29.5938
DATA	1926	23	56	0	0	A_64_P099006	BC105831	4987.49	349.179	3.006053e+000	3.004638e+000	61.5	29.5	1.084346e+001	0	0	0	0	0	0	2.35545	0	0	46.5243	31.1071
DATA	1927	23	57	0	0	A_42_P795467	NM_001108055	5012.63	349.444	1.630610e+002	1.658082e+001	218	30	6.758501e+000	0	0	0	0	0	0	154.035	1	1	48.2044	29.0345
DATA	1928	23	58	0	0	A_42_P629321	NM_031590	5038.11	349.5	9.543683e+001	1.000944e+001	149.5	28	8.345975e+000	0	0	0	0	0	0	89.7954	1	1	56.9804	30.9697
DATA	1929	23	59	0	0	A_42_P549786	NM_022609	5063.24	349.5	4.831493e+003	4.831588e+002	4454	30	9.482717e+000	0	0	0	0	0	0	4527.58	1	1	46.5243	32.4595
DATA	1930	23	60	0	0	A_64_P006354	ENSRNOT00000043959	5088.67	349.5	4.714071e+001	5.610731e+000	105	27	7.109166e+000	0	0	0	0	0	0	43.9913	1	1	57.5363	28.0976
DATA	1931	23	61	0	0	A_64_P057109	A_64_P057109	5114.06	349.382	1.533566e+003	1.533870e+002	1490	31	6.140859e+000	0	0	0	0	0	0	1425.01	1	1	46.1809	31.1667
DATA	1932	23	62	0	0	A_44_P101361	NM_032070	5139.5	349.5	1.668686e+001	3.493250e+000	75	30	6.354282e+000	0	0	0	0	0	0	15.4388	1	1	57.5363	30.5758
DATA	1933	23	63	0	0	A_64_P103354	ENSRNOT00000066893	5165	349.545	9.866514e+002	9.871328e+001	963	30	8.004692e+000	0	0	0	0	0	0	908.84	1	1	55.8519	31.5652
DATA	1934	23	64	0	0	A_42_P746868	NM_001127580	5190.37	349.64	3.288786e+004	3.288788e+003	29100	28.5	7.612994e+000	0	0	0	0	0	0	30159.9	1	1	48.8603	30.5714
DATA	1935	23	65	0	0	A_42_P707838	NM_012979	5215.63	349.36	2.677435e+003	2.677616e+002	2411	32	1.070576e+001	0	0	0	1	0	0	2444.22	1	1	48.8603	34.5517
DATA	1936	23	66	0	0	A_42_P628098	NM_001107991	5241.06	349.382	1.294434e+003	1.294811e+002	1241.5	33	8.478797e+000	0	0	0	0	0	0	1176.29	1	1	46.1809	32.84
DATA	1937	23	67	0	0	A_64_P028071	ENSRNOT00000042928	5266.58	349.573	2.540200e+005	2.540200e+004	225650	37.5	1.086053e+001	0	0	0	0	0	0	229777	1	1	57.5363	37.1071
DATA	1938	23	68	0	0	A_64_P002944	A_64_P002944	5292.25	349.61	1.653339e+004	1.653342e+003	14998.5	30	4.982729e+000	0	0	0	0	0	0	14885.6	1	1	49.8279	30
DATA	1939	23	69	0	0	A_64_P072159	XM_574060	5317.42	349.573	2.799841e+001	4.228195e+000	87	26.5	7.078406e+000	0	0	0	0	0	0	25.0914	1	1	57.5363	27.6563
DATA	1940	23	70	0	0	A_64_P052365	NM_001109318	5342.72	349.967	2.786489e+002	2.804609e+001	315	30	6.503153e+000	0	0	0	0	0	0	248.573	1	1	44.7812	31.0714
DATA	1941	23	71	0	0	A_64_P023150	ENSRNOT00000042777	5368.17	349.829	1.979701e+002	2.005365e+001	237.5	33	8.896450e+000	0	0	0	0	0	0	175.769	1	1	46.8651	32.4643
DATA	1942	23	72	0	0	A_44_P374902	NM_133429	5393.5	349.648	4.645688e+002	4.656787e+001	471	28	6.637972e+000	0	0	0	0	0	0	410.531	1	1	57.5363	29.7037
DATA	1943	23	73	0	0	A_44_P163271	NM_198733	5419	349.545	1.066247e+001	3.399877e+000	68.5	31.5	8.995810e+000	0	0	0	0	0	0	9.37783	1	0	55.8519	32.0357
DATA	1944	23	74	0	0	A_42_P548520	NM_001100834	5444.5	349.5	5.380437e+003	5.380535e+002	4670	26	6.526754e+000	0	0	0	0	0	0	4710.03	1	1	49.1849	27.2069
DATA	1945	23	75	0	0	A_64_P012154	XM_225935	5469.02	349.6	2.634548e+001	4.189940e+000	82	30	6.546537e+000	0	0	0	0	0	0	22.9603	1	1	37.4241	31
DATA	1946	23	76	0	0	A_64_P033574	NM_001000606	5495.09	349.614	4.376404e+000	3.302564e+000	64.5	31	1.002614e+001	0	0	0	0	0	0	3.79611	1	0	57.259	32.2632
DATA	1947	23	77	0	0	A_64_P027764	NM_022685	5520.65	349.903	1.209988e+002	1.253873e+001	164	32	8.603646e+000	0	0	0	0	0	0	104.482	1	1	48.2044	30.9091
DATA	1948	23	78	0	0	A_42_P484738	NM_022266	5546.18	349.74	1.968731e+003	1.969008e+002	1718	29	8.350011e+000	0	0	0	0	0	0	1692.26	1	1	47.5395	28.4286
DATA	1949	23	79	0	0	A_64_P036355	NM_053311	5571.3	349.9	1.639786e+004	1.639789e+003	13369	29	8.650294e+000	0	0	0	0	0	0	14034	1	1	47.2035	30.5517
DATA	1950	23	80	0	0	A_42_P694928	NM_001109046	5596.44	349.973	3.881586e+002	3.895860e+001	380	28.5	5.494407e+000	0	0	0	0	0	0	330.782	1	1	48.5334	29.8667
DATA	1951	23	81	0	0	A_42_P588738	NM_133542	5622.09	349.935	7.322399e+001	8.050799e+000	120	30	7.384140e+000	0	0	0	0	0	0	62.1316	1	1	54.4085	31.5946
DATA	1952	23	82	0	0	A_64_P141254	XM_001060542	5647.5	350	2.664954e+001	4.288720e+000	81.5	31.5	8.903096e+000	0	0	0	0	0	0	22.5189	1	1	54.1152	33.6563
DATA	1953	23	83	0	0	A_42_P546054	NM_001013873	5673.14	349.789	3.178525e+002	3.196384e+001	323	27	8.252505e+000	0	0	0	0	0	0	267.474	1	1	47.2035	26.6563
DATA	1954	23	84	66	1	DarkCorner	DarkCorner	5698.33	350.2	3.400250e+000	3.387016e+000	54	29	8.009353e+000	0	0	0	0	0	0	-4.4174	0	0	47.2035	28.1765
DATA	1955	23	85	66	1	DarkCorner	DarkCorner	5723.97	350.071	3.413438e+000	3.400152e+000	59	28	8.911445e+000	0	0	0	0	0	0	-0.261344	0	0	46.8651	28.9318
DATA	1956	24	1	66	1	DarkCorner	DarkCorner	3602.95	355.718	3.092680e+000	3.080643e+000	58	29	7.506877e+000	0	0	0	0	0	0	-1.49162	0	0	48.5334	29.825
DATA	1957	24	2	66	1	DarkCorner	DarkCorner	3628.5	356	3.077412e+000	3.065435e+000	55	28.5	6.230940e+000	0	0	0	0	0	0	-5.85842	0	0	65	28.7692
DATA	1958	24	3	0	0	A_64_P000371	NM_017308	3653.91	355.896	1.171111e+003	1.171508e+002	1154	30	7.093595e+000	0	0	0	0	0	0	1089.9	1	1	46.8651	29.3704
DATA	1959	24	4	0	0	A_42_P772356	NM_001191597	3679.44	356.027	6.514911e+003	6.514982e+002	6253	31	8.943190e+000	0	0	0	0	0	0	6091.53	1	1	48.5334	31.2258
DATA	1961	24	6	0	0	A_42_P470757	NM_001004075	3730.21	356.194	4.638224e+003	4.638322e+002	4409	31	8.416957e+000	0	0	0	0	0	0	4375.52	1	1	47.5395	30.3871
DATA	1962	24	7	0	0	A_64_P034250	ENSRNOT00000041464	3755.5	356	6.413273e+001	7.079122e+000	124	27.5	7.631906e+000	0	0	0	0	0	0	60.7538	1	1	54.1152	29.2353
DATA	1963	24	8	0	0	A_64_P065063	NM_012954	3781	356	8.395231e+001	8.910125e+000	138	29	6.883536e+000	0	0	0	0	0	0	79.8564	1	1	54.9904	29.3125
DATA	1964	24	9	0	0	A_64_P088866	ENSRNOT00000049194	3806.5	356	4.125523e+002	4.136223e+001	473	29	7.942265e+000	0	0	0	0	0	0	393.982	1	1	54.1152	31.2903
DATA	1965	24	10	0	0	A_44_P111759	NM_001000956	3831.89	355.987	7.981535e+000	3.067631e+000	68	31	9.217709e+000	0	0	0	0	0	0	7.65122	1	0	46.8651	31.3846
DATA	1966	24	11	0	0	A_64_P045019	ENSRNOT00000032417	3857.13	356	1.760893e+003	1.761140e+002	1775	27	6.863179e+000	0	0	0	0	0	0	1694.14	1	1	48.5334	26.6452
DATA	1967	24	12	0	0	A_64_P138989	XM_001053562	3882.5	356	6.470492e+001	7.107515e+000	121	29	8.630073e+000	0	0	0	0	0	0	62.4694	1	1	54.1152	29.2667
DATA	1968	24	13	0	0	A_42_P537715	NM_001025743	3907.55	356.066	2.878896e+003	2.879045e+002	2735	35	8.061638e+000	0	0	0	0	0	0	2788.6	1	1	49.1849	34.36
DATA	1969	24	14	0	0	A_42_P453171	NM_001107063	3933.19	356.026	1.871753e+003	1.871981e+002	1861.5	31	8.382883e+000	0	0	0	0	0	0	1818.84	1	1	49.1849	30.9091
DATA	1971	24	16	0	0	A_64_P096157	ENSRNOT00000059486	3984.39	356.069	2.197355e+002	2.216473e+001	266	32	9.743004e+000	0	0	0	0	0	0	214.784	1	1	53.8203	32.3636
DATA	1972	24	17	0	0	A_43_P10076	NM_031665	4009.28	355.944	1.359469e+004	1.359473e+003	13036	33	1.078966e+001	0	0	0	0	0	0	13322.8	1	1	47.5395	33.75
DATA	1974	24	19	0	0	A_42_P772878	NM_001011936	4060.09	356.104	3.288573e+003	3.288699e+002	3237	28	6.879515e+000	0	0	0	0	0	0	3238.38	1	1	46.8651	26.7143
DATA	1976	24	21	0	0	A_44_P447394	NM_019193	4110.69	356.532	9.066718e+003	9.066764e+002	8730	30.5	6.604785e+000	0	0	0	0	0	0	8965.25	1	1	49.8279	29.6667
DATA	1977	24	22	0	0	A_42_P504250	NM_001134987	4136.24	356.394	1.409553e+003	1.409844e+002	1463	29	8.861385e+000	0	0	0	0	0	0	1396.25	1	1	47.5395	30.4
DATA	1978	24	23	0	0	A_42_P675802	NM_145777	4162	356.455	3.730172e+003	3.730282e+002	3648	31	7.932407e+000	0	0	0	0	0	0	3700.95	1	1	55.8519	31.6667
DATA	1979	24	24	0	0	A_64_P111843	XM_001074913	4187	356.5	1.282118e+003	1.282436e+002	1309.5	31	6.417906e+000	0	0	0	0	0	0	1273.85	1	1	48.5334	29.3125
DATA	1980	24	25	0	0	A_44_P118724	NM_019361	4212.48	356.147	1.869763e+004	1.869765e+003	18277.5	31	7.604899e+000	0	0	0	0	0	0	18599.1	1	1	49.8279	31.4
DATA	1981	24	26	0	0	A_43_P21749	NM_001108329	4238.33	356.5	4.677320e+001	5.477890e+000	108	29	5.999118e+000	0	0	0	0	0	0	46.5778	1	1	57.5363	29.7143
DATA	1982	24	27	0	0	A_43_P11879	NM_017250	4263.28	355.918	5.378253e+001	6.086296e+000	115.5	29	7.644908e+000	0	0	0	0	0	0	53.5993	1	1	44.4243	30.2692
DATA	1983	24	28	0	0	A_64_P023182	NM_001000033	4288.81	356.145	1.639629e+001	3.285491e+000	78	32	6.849989e+000	0	0	0	0	0	0	16.3518	1	1	45.1352	31.8788
DATA	1985	24	30	0	0	A_44_P368461	NM_001107085	4339.58	356.427	1.375535e+001	3.159909e+000	74	27	8.122694e+000	0	0	0	0	0	0	13.7292	1	0	57.5363	28.4333
DATA	1986	24	31	0	0	A_64_P097257	A_64_P097257	4365.11	356.5	1.144476e+002	1.179295e+001	175.5	28	6.533431e+000	0	0	0	0	0	0	114.244	1	1	56.9804	28
DATA	1987	24	32	0	0	A_64_P100634	NM_001100171	4390.3	356.704	4.024736e+002	4.034776e+001	466.5	31	6.216774e+000	0	0	0	0	0	0	401.736	1	1	47.5395	29.8
DATA	1988	24	33	0	0	A_64_P041902	NM_001025653	4415.75	356.373	4.253807e+003	4.253903e+002	4243	29	6.686851e+000	0	0	0	0	0	0	4244.77	1	1	46.1809	29.2258
DATA	1990	24	35	0	0	A_64_P116171	NM_001004266	4466.39	356.366	1.368199e+002	1.397535e+001	192	28	7.997921e+000	0	0	0	0	0	0	136.385	1	1	47.8731	30.9688
DATA	1991	24	36	0	0	A_44_P243279	NM_001134780	4492	355.934	3.357278e+002	3.369361e+001	401	28	4.726117e+000	0	0	0	0	0	0	334.375	1	1	44.0646	27.5185
DATA	1992	24	37	0	0	A_64_P151468	XM_001062494	4517.5	356.5	2.339739e+001	3.690111e+000	82	28.5	7.660348e+000	0	0	0	0	0	0	23.2816	1	1	65	30.4706
DATA	1993	24	38	0	0	A_64_P075769	ENSRNOT00000043984	4542.84	356.882	3.758175e+003	3.758283e+002	3970.5	30	7.286477e+000	0	0	0	0	0	0	3735.42	1	1	46.5243	29.0625
DATA	1994	24	39	0	0	A_42_P508921	NM_031703	4568.24	357.227	2.871573e+000	2.862262e+000	62	26	8.144104e+000	0	0	0	0	0	0	1.02573	0	0	45.835	29.1333
DATA	1995	24	40	0	0	A_44_P503376	NM_001000274	4593.53	356.7	2.876046e+000	2.864853e+000	56.5	31	6.170881e+000	0	0	0	0	0	0	-4.44008	0	0	47.2035	29.8148
DATA	1996	24	41	0	0	A_64_P093088	NM_001000816	4619	356.545	3.448654e+001	4.486481e+000	95	31	5.914799e+000	0	0	0	0	0	0	34.1221	1	1	65	31.7879
DATA	1997	24	42	0	0	A_44_P489608	NM_023967	4644.39	356.551	1.709944e+002	1.733945e+001	233.5	30	6.865285e+000	0	0	0	0	0	0	168.876	1	1	47.5395	29.9189
DATA	1998	24	43	0	0	A_44_P213088	ENSRNOT00000037507	4669.58	356.573	3.208168e+001	4.311730e+000	95	34	9.442282e+000	0	0	0	0	0	0	31.6212	1	1	57.5363	34.8148
DATA	1999	24	44	0	0	A_64_P060725	NM_001025278	4695.42	356.573	1.320990e+001	3.174970e+000	75	32	8.172715e+000	0	0	0	0	0	0	12.9916	1	0	57.5363	33.1714
DATA	2000	24	45	0	0	A_44_P384698	XM_216321	4720.39	356.667	2.041947e+003	2.042152e+002	2102.5	32	5.874238e+000	0	0	0	0	0	0	2003.62	1	1	47.2035	32.56
DATA	2001	24	46	0	0	A_42_P696084	NM_031022	4745.94	356.768	3.509495e+003	3.509615e+002	3538.5	26.5	6.923254e+000	0	0	0	0	0	0	3435.07	1	1	46.5243	27.9375
DATA	2002	24	47	0	0	A_64_P014918	NM_001108246	4771.38	356.705	7.943206e+002	7.948530e+001	824	27.5	7.465175e+000	0	0	0	0	0	0	775.418	1	1	50.4627	28.3929
DATA	2003	24	48	0	0	A_64_P032690	ENSRNOT00000049975	4796.58	356.573	8.753596e+004	8.753596e+003	85367.5	34	6.124168e+000	0	0	0	0	0	0	85215.7	1	1	57.5363	33.125
DATA	2004	24	49	0	0	A_42_P481516	NM_134364	4822	356.708	3.019396e+003	3.019537e+002	2915	32.5	7.416109e+000	0	0	0	0	0	0	2930.81	1	1	47.8731	33.4643
DATA	2005	24	50	0	0	A_64_P166158	ENSRNOT00000013694	4847.5	356.648	1.923131e+002	1.945388e+001	246	32	9.281988e+000	0	0	0	0	0	0	186.095	1	1	57.5363	32.303
DATA	2006	24	51	0	0	A_64_P140338	A_64_P140338	4872.91	356.614	3.893227e+000	2.969341e+000	65	28	8.357985e+000	0	0	0	0	0	0	3.75527	1	0	57.259	29.4516
DATA	2007	24	52	0	1	ERCC-00062_278	ERCC-00062_278	4898.61	356.643	1.874403e+002	1.897532e+001	249	26	7.402520e+000	0	0	0	0	0	0	180.19	1	1	41.4593	27.6216
DATA	2008	24	53	0	0	A_64_P110838	NM_001013175	4923.94	356.884	2.275665e+002	2.294884e+001	277	29	8.437117e+000	0	0	0	0	0	0	218.016	1	1	46.8651	29.5806
DATA	2009	24	54	0	0	A_42_P802358	NM_001024341	4948.93	356.786	1.553252e+004	1.553254e+003	14274.5	29.5	9.758164e+000	0	0	0	0	0	0	14828.1	1	1	46.8651	31.4375
DATA	2010	24	55	0	0	A_64_P010421	A_64_P010421	4974.7	357.122	5.496980e+001	6.255311e+000	114	29	1.063530e+001	0	0	0	0	0	0	52.2828	1	1	48.8603	32.2647
DATA	2011	24	56	0	0	A_43_P13320	NM_138880	5000.26	357.076	6.869134e+000	3.074516e+000	66	31	7.239245e+000	0	0	0	0	0	0	6.50834	1	0	45.835	30.64
DATA	2012	24	57	0	0	A_42_P800916	NM_022403	5025.46	357.018	4.493127e+001	5.407322e+000	106	31.5	6.688061e+000	0	0	0	0	0	0	42.406	1	1	42.5954	30.7143
DATA	2013	24	58	0	0	A_42_P554610	XM_001064863	5050.67	356.75	1.403307e+004	1.403310e+003	12528.5	29	8.724096e+000	0	0	0	0	0	0	13191.2	1	1	47.5395	31.2121
DATA	2014	24	59	0	0	A_42_P476353	NM_001012113	5075.93	356.786	1.133423e+004	1.133427e+003	10087.5	27	8.154201e+000	0	0	0	0	0	0	10611	1	1	46.8651	29.1892
DATA	2015	24	60	0	0	A_43_P12234	NM_022516	5101.44	356.972	2.286087e+003	2.286290e+002	2113	31	7.802365e+000	0	0	0	0	0	0	2131.29	1	1	48.2044	31.4242
DATA	2016	24	61	0	0	A_64_P048315	ENSRNOT00000044039	5126.88	357.095	2.357449e+002	2.377208e+001	275	31.5	7.106768e+000	0	0	0	0	0	0	218.848	1	1	47.5395	32.8846
DATA	2017	24	62	0	0	A_44_P477047	NM_171983	5152.5	357	6.812470e+004	6.812471e+003	61916	30	8.305766e+000	0	0	0	0	0	0	62964.7	1	1	54.1152	31.7037
DATA	2018	24	63	0	0	A_43_P11871	NM_017230	5177.4	356.956	8.969135e+001	9.484995e+000	141	29.5	6.624070e+000	0	0	0	0	0	0	82.5399	1	1	46.1809	30.7857
DATA	2019	24	64	0	0	A_64_P060608	XM_001068783	5203	357	3.143791e+001	4.414647e+000	91	30	1.232987e+001	0	0	0	0	0	0	28.8015	1	1	54.9904	34.4444
DATA	2020	24	65	0	0	A_64_P115811	NM_001008516	5228.72	356.905	2.834118e+001	4.210285e+000	86.5	31	7.590105e+000	0	0	0	0	0	0	25.8456	1	1	48.8603	31.0741
DATA	2021	24	66	0	0	A_44_P131296	ENSRNOT00000039892	5254.04	356.944	3.177837e+001	4.458854e+000	88	35	8.803717e+000	0	0	0	0	0	0	28.8488	1	1	46.8651	35.875
DATA	2022	24	67	0	0	A_44_P668388	NM_001109245	5279.02	356.794	3.464305e+002	3.478524e+001	371	31	1.153505e+001	0	0	0	0	0	0	313.067	1	1	45.4864	34.6667
DATA	2023	24	68	0	0	A_64_P069729	NM_019189	5304.5	357	5.458850e+001	6.305750e+000	110	30	8.160223e+000	0	0	0	0	0	0	49.1046	1	1	54.1152	29.5484
DATA	2024	24	69	1028	1	(+)E1A_r60_1	E1A_r60_1	5330.19	356.984	3.183757e+000	3.171631e+000	61	28	6.952434e+000	0	0	0	0	0	0	0.367261	0	0	45.4864	28.3243
DATA	2025	24	70	0	0	A_64_P165441	NM_001109059	5355.79	356.961	3.812826e+001	4.968921e+000	92.5	31	7.478859e+000	0	0	0	0	0	0	33.977	1	1	49.1849	32
DATA	2026	24	71	0	0	A_44_P1034910	NM_201562	5380.7	357.1	3.257901e+003	3.258058e+002	2895	31	8.406542e+000	0	0	0	0	0	0	2890.04	1	1	47.2035	31.7931
DATA	2027	24	72	0	0	A_42_P631818	NM_030854	5406.18	356.985	3.228439e+000	3.219276e+000	62	30	6.626600e+000	0	0	0	0	0	0	1.3065	0	0	45.835	30.6129
DATA	2028	24	73	0	0	A_64_P095620	ENSRNOT00000031258	5431.65	356.824	6.121631e+001	6.921964e+000	113	29.5	8.941510e+000	0	0	0	0	0	0	53.7971	1	1	46.8651	29.2813
DATA	2029	24	74	0	0	A_42_P726573	NM_053838	5457.15	356.803	1.627721e+003	1.628044e+002	1471.5	26	6.402788e+000	0	0	0	0	0	0	1423.82	1	1	45.835	28.0645
DATA	2030	24	75	0	0	A_64_P029142	NM_001107866	5482.43	356.947	6.786503e+001	7.529219e+000	122	30	7.261485e+000	0	0	0	0	0	0	59.0954	1	1	49.1849	31.6667
DATA	2031	24	76	0	0	A_43_P22902	NM_001106874	5507.74	357.029	3.288282e+000	3.280223e+000	61	30	8.185092e+000	0	0	0	0	0	0	1.52802	0	0	46.8651	30.3684
DATA	2032	24	77	0	0	A_42_P619008	NM_001013079	5533.03	357.289	5.949941e+003	5.950032e+002	5030	29	7.680950e+000	0	0	0	0	0	0	5135.09	1	1	49.1849	28.9459
DATA	2033	24	78	0	0	A_64_P054421	A_64_P054421	5558.78	357.392	8.994200e+000	3.424884e+000	67	28.5	7.029004e+000	0	0	0	0	0	0	7.72787	1	0	50.4627	28.2
DATA	2034	24	79	0	0	A_42_P627330	NM_001106628	5584	357.455	7.516591e+002	7.523914e+001	689.5	29	6.347635e+000	0	0	0	0	0	0	643.055	1	1	55.8519	29.3226
DATA	2035	24	80	0	0	A_64_P049613	A_64_P049613	5609.44	357.479	3.261297e+001	4.663240e+000	88	29	7.449776e+000	0	0	0	0	0	0	27.782	1	1	49.1849	30.8286
DATA	2036	24	81	0	0	A_42_P708614	NM_001130505	5634.58	357.427	5.572251e+004	5.572252e+003	46236	30	9.242641e+000	0	0	0	1	0	0	47272	1	1	57.5363	32.1563
DATA	2037	24	82	0	0	A_42_P660068	NM_031350	5660.21	357.125	2.825489e+003	2.825689e+002	2381	29	8.163044e+000	0	0	0	0	0	0	2386.99	1	1	47.5395	30.8
DATA	2038	24	83	66	1	DarkCorner	DarkCorner	5685.5	357.5	3.387127e+000	3.373944e+000	53	30	9.468648e+000	0	0	0	0	0	0	-6.10483	0	0	57.5363	30.303
DATA	2039	24	84	66	1	DarkCorner	DarkCorner	5711.11	357.5	3.400221e+000	3.386987e+000	59	27	8.112841e+000	0	0	0	0	0	0	-1.86977	0	0	50.4627	27.5455
DATA	2040	24	85	66	1	DarkCorner	DarkCorner	5736.57	357.512	3.412804e+000	3.406641e+000	61	26	6.930698e+000	0	0	0	0	0	0	1.83865	0	0	50.4627	26.8158
DATA	2041	25	1	66	1	DarkCorner	DarkCorner	3590.65	363.232	3.095492e+000	3.089327e+000	64	26	6.390194e+000	0	0	0	0	0	0	1.75487	0	0	46.8651	26.1676
DATA	2042	25	2	66	1	DarkCorner	DarkCorner	3616	363	3.080592e+000	3.074334e+000	62	30	6.842512e+000	0	0	0	0	0	0	1.73621	0	0	54.9904	29.2941
DATA	2043	25	3	0	0	A_64_P106975	A_64_P106975	3641.36	363.188	2.050612e+002	2.073228e+001	252	30	6.547656e+000	0	0	0	0	0	0	190.656	1	1	49.5074	29.2222
DATA	2044	25	4	0	0	A_42_P799702	NM_145093	3666.67	363.25	3.202979e+002	3.217371e+001	349	33	8.383099e+000	0	0	0	1	0	0	299.184	1	1	47.5395	32.2593
DATA	2045	25	5	0	0	A_42_P704429	NM_053428	3692.42	363.427	3.165843e+004	3.165844e+003	28890.5	30	8.478396e+000	0	0	0	1	0	0	29708.5	1	1	57.5363	31.963
DATA	2046	25	6	0	0	A_64_P129730	NM_001033896	3717.5	363.5	1.707122e+002	1.733501e+001	216.5	28.5	7.716306e+000	0	0	0	0	0	0	160.896	1	1	49.1849	30.1
DATA	2047	25	7	0	0	A_64_P156308	NM_001008284	3742.91	363.386	9.255048e+002	9.259909e+001	943	31	8.100179e+000	0	0	0	0	0	0	876.002	1	1	57.259	30.2903
DATA	2048	25	8	0	0	A_44_P152029	A_44_P152029	3768.42	363.427	1.895473e+001	3.538006e+000	75	28	7.644245e+000	0	0	0	0	0	0	18.0155	1	1	57.5363	29.2188
DATA	2049	25	9	0	0	A_42_P751152	NM_001106360	3793.58	363.427	5.817696e+004	5.817697e+003	55204	29	7.405434e+000	0	0	0	0	0	0	55513.1	1	1	57.5363	30.9259
DATA	2050	25	10	0	0	A_64_P010494	NM_001001421	3819.06	362.906	1.596904e+002	1.624186e+001	219	29	1.180513e+001	0	0	0	0	0	0	152.955	1	1	45.835	31.3056
DATA	2051	25	11	0	0	A_64_P054606	NM_001107279	3844.43	362.951	4.264309e+002	4.274525e+001	475	29	9.982192e+000	0	0	0	0	0	0	409.956	1	1	43.7019	30.0313
DATA	2052	25	12	0	0	A_44_P335679	NM_001108168	3869.95	363.477	3.346828e+001	4.456599e+000	94	29	5.558061e+000	0	0	0	0	0	0	32.2924	1	1	55.8519	27.7273
DATA	2053	25	13	0	0	A_64_P128766	NM_001034912	3895.39	363.924	1.330921e+002	1.362848e+001	188	30	9.159148e+000	0	0	0	0	0	0	128.86	1	1	45.4864	29.16
DATA	2054	25	14	0	0	A_42_P595591	NM_031011	3920.44	363.534	1.886231e+004	1.886234e+003	17700.5	29	8.825763e+000	0	0	0	0	0	0	18319.6	1	1	49.1849	30.5862
DATA	2055	25	15	0	0	A_44_P962846	ENSRNOT00000058887	3945.84	363.605	3.434199e+002	3.446544e+001	387	29	7.773819e+000	0	0	0	0	0	0	334.564	1	1	49.8279	28.1471
DATA	2056	25	16	0	0	A_64_P111878	XR_005569	3971.16	363.629	2.005809e+003	2.006019e+002	2101	28	9.602615e+000	0	0	0	0	0	0	1959.74	1	1	44.0646	28.8919
DATA	2057	25	17	0	0	A_64_P149225	NM_001100833	3996.89	363.5	1.167821e+005	1.167821e+004	114414	32.5	1.030729e+001	0	0	0	0	0	0	114413	1	1	56.9804	35.3667
DATA	2058	25	18	0	0	A_64_P032361	ENSRNOT00000061428	4022.19	363.353	9.837300e+002	9.841546e+001	1001	29	8.720864e+000	0	0	0	0	0	0	966.211	1	1	46.8651	29.6471
DATA	2059	25	19	0	0	A_64_P038843	A_64_P038843	4047.6	363.09	1.787667e+001	3.393194e+000	78	27	7.645040e+000	0	0	0	0	0	0	17.5996	1	1	46.1809	26.913
DATA	2060	25	20	1028	1	(+)E1A_r60_a97	E1A_r60_a97	4073.11	363.5	1.727037e+001	3.356049e+000	77	30	8.944104e+000	0	0	0	0	0	0	17.0413	1	1	65	29.0541
DATA	2061	25	21	0	0	A_42_P586883	NM_001106416	4098.5	363.5	5.889188e+001	6.552056e+000	121	28	1.024321e+001	0	0	0	0	0	0	58.2285	1	1	57.5363	30.44
DATA	2062	25	22	0	0	A_42_P626023	NM_001107265	4123.51	363.658	8.126385e+002	8.131439e+001	856	30.5	7.946359e+000	0	0	0	0	0	0	804.964	1	1	48.5334	32.2308
DATA	2063	25	23	0	0	A_64_P304646	ENSRNOT00000046873	4149.33	363.5	4.042707e+001	4.953035e+000	99	36	7.783286e+000	0	0	0	0	0	0	40.1126	1	1	57.5363	33.2727
DATA	2064	25	24	0	0	A_42_P540711	NM_133568	4174.44	364.027	1.964829e+004	1.964831e+003	19420	31	6.416074e+000	0	0	0	0	0	0	19525.3	1	1	48.5334	30.4348
DATA	2065	25	25	0	0	A_64_P079149	XM_001063529	4200.11	363.5	1.175535e+002	1.209676e+001	182.5	31	6.882541e+000	0	0	0	0	0	0	116.965	1	1	56.9804	28.7297
DATA	2066	25	26	0	0	A_42_P507072	FQ213070	4225.31	363.662	4.749247e+003	4.749333e+002	4718	28	5.904620e+000	0	0	0	0	0	0	4730.81	1	1	48.5334	27.6897
DATA	2067	25	27	0	0	A_44_P314270	ENSRNOT00000015469	4250.54	363.614	1.881076e+002	1.902510e+001	243	29	7.348155e+000	0	0	0	0	0	0	187.551	1	1	47.5395	29.3462
DATA	2068	25	28	0	0	A_64_P026098	ENSRNOT00000027092	4276.33	363.5	1.090694e+002	1.127205e+001	175	32	8.997790e+000	0	0	0	0	0	0	108.829	1	1	57.5363	32.0909
DATA	2069	25	29	0	0	A_64_P018599	XM_229548	4301.3	364.493	1.794248e+001	3.362500e+000	75	32	7.602457e+000	0	0	0	0	0	0	17.9148	1	1	45.835	32.1212
DATA	2070	25	30	0	0	A_43_P15907	NM_001134567	4327	363.545	4.640690e+001	5.442283e+000	104	27	8.472346e+000	0	0	0	0	0	0	46.3486	1	1	55.8519	27.7742
DATA	2071	25	31	0	0	A_64_P151804	A_64_P151804	4352.06	364.175	8.169627e+001	8.649911e+000	140	27	6.814229e+000	0	0	0	0	0	0	81.6154	1	1	45.4864	27.9394
DATA	2072	25	32	0	0	A_42_P642743	NM_017005	4377.44	364.028	1.654454e+004	1.654456e+003	16168	29.5	6.781661e+000	0	0	0	0	0	0	16528.2	1	1	48.2044	29.4063
DATA	2073	25	33	0	0	A_42_P630463	NM_022238	4403.26	363.652	3.678835e+002	3.689802e+001	433.5	29	5.777372e+000	0	0	0	0	0	0	367.444	1	1	47.2035	29.0938
DATA	2074	25	34	0	0	A_64_P119533	NM_001000351	4428.58	363.573	2.407274e+001	3.725885e+000	84	30	5.789934e+000	0	0	0	0	0	0	24.0354	1	1	57.5363	30.76
DATA	2075	25	35	0	0	A_64_P158068	FQ219182	4453.87	363.771	4.313318e+003	4.313411e+002	4295.5	28	7.202167e+000	0	0	0	0	0	0	4304.44	1	1	46.5243	29.6061
DATA	2076	25	36	0	0	A_64_P000779	XM_225838	4479.29	364.167	2.783838e+001	3.981965e+000	89	31	8.264316e+000	0	0	0	0	0	0	27.7625	1	1	45.835	32.0323
DATA	2077	25	37	0	0	A_44_P630082	ENSRNOT00000020640	4504.64	364.129	2.228390e+002	2.246537e+001	283	29	7.602294e+000	0	0	0	0	0	0	222.034	1	1	46.8651	31.5556
DATA	2078	25	38	0	0	A_42_P717654	XM_001063683	4529.93	364.418	4.552684e+003	4.552773e+002	4428.5	31	8.119958e+000	0	0	0	0	0	0	4531.56	1	1	45.835	32.3939
DATA	2079	25	39	0	0	A_42_P792382	NM_017257	4555.37	364.265	8.548870e+003	8.548918e+002	8342	31	8.560630e+000	0	0	0	0	0	0	8498.51	1	1	46.5243	30.1071
DATA	2080	25	40	0	0	A_64_P075035	NM_001001014	4580.91	363.614	1.901661e+002	1.923054e+001	254	29	9.118784e+000	0	0	0	0	0	0	188.764	1	1	57.259	31.5938
DATA	2081	25	41	0	0	A_64_P021281	NM_001039022	4606.48	363.911	7.581946e+003	7.582000e+002	7396	31.5	7.211103e+000	0	0	0	0	0	0	7514.28	1	1	49.8279	32
DATA	2082	25	42	0	0	A_44_P729533	TC581820	4631.76	364	8.294489e+003	8.294539e+002	8043	30	7.071131e+000	0	0	0	0	0	0	8206.21	1	1	46.8651	30.3824
DATA	2083	25	43	0	0	A_42_P802358	NM_001024341	4656.84	364.103	1.575474e+004	1.575477e+003	15488	30.5	5.913949e+000	0	0	0	0	0	0	15557.8	1	1	46.5243	30.1563
DATA	2084	25	44	0	0	A_42_P481087	XM_232226	4682.09	363.896	1.382229e+003	1.382529e+002	1381	32	8.801576e+000	0	0	0	0	0	0	1362.1	1	1	46.8651	32.125
DATA	2085	25	45	0	0	A_42_P561597	NM_001106486	4707.69	364.014	8.666863e+003	8.666911e+002	8447	31	6.833268e+000	0	0	0	0	0	0	8521.48	1	1	47.2035	31.875
DATA	2086	25	46	0	0	A_64_P113381	A_64_P113381	4733.47	363.824	1.975646e+001	3.504829e+000	80	29	5.775679e+000	0	0	0	0	0	0	19.3774	1	1	46.8651	30.3929
DATA	2087	25	47	0	0	A_64_P088695	NM_001134414	4758.44	364.027	1.256408e+003	1.256743e+002	1240	29	5.094174e+000	0	0	0	0	0	0	1229.25	1	1	48.5334	28.2813
DATA	2088	25	48	0	0	A_44_P728586	ENSRNOT00000013367	4784	364	8.892868e+002	8.897628e+001	929.5	29	7.765529e+000	0	0	0	0	0	0	867.7	1	1	54.9904	29.8
DATA	2089	25	49	0	0	A_42_P544898	NM_001108279	4809.5	364	3.629537e+001	4.657288e+000	95.5	32	6.104097e+000	0	0	0	0	0	0	35.3134	1	1	54.1152	32.48
DATA	2090	25	50	0	0	A_44_P432910	NM_012814	4834.5	364	1.322210e+005	1.322210e+004	127839	33	8.322522e+000	0	0	0	0	0	0	128266	1	1	54.1152	33.6667
DATA	2091	25	51	0	0	A_64_P157820	XM_001079095	4860.15	363.985	9.377778e+001	9.826693e+000	149.5	29	9.341513e+000	0	0	0	0	0	0	90.6865	1	1	46.8651	31.0286
DATA	2092	25	52	0	0	A_42_P601802	NM_134465	4885.55	364.083	3.428626e+003	3.428752e+002	3299	28	7.205716e+000	0	0	0	0	0	0	3304.88	1	1	49.8279	29.2121
DATA	2093	25	53	0	0	A_64_P039737	NM_001130508	4911.13	364.24	7.508894e+002	7.514709e+001	769.5	25	8.416574e+000	0	0	0	0	0	0	721.341	1	1	47.8731	28.75
DATA	2094	25	54	0	0	A_42_P648800	AA998304	4936.39	364.04	1.079432e+002	1.119443e+001	164	31	8.040538e+000	0	0	0	0	0	0	103.332	1	1	49.1849	30.3103
DATA	2095	25	55	0	0	A_64_P007009	ENSRNOT00000014567	4961.77	364.212	2.676372e+003	2.676538e+002	2620.5	29	8.734775e+000	0	0	0	0	0	0	2552.85	1	1	45.835	31
DATA	2096	25	56	0	0	A_64_P049527	TC606896	4987.33	364.377	1.402547e+002	1.434021e+001	194	29.5	1.045525e+001	0	0	0	0	0	0	133.283	1	1	46.8651	31.8571
DATA	2097	25	57	0	0	A_44_P281595	NM_001037556	5012.43	363.955	6.487330e+001	7.147177e+000	122	33	7.263851e+000	0	0	0	0	0	0	61.4116	1	1	45.835	31.9259
DATA	2098	25	58	0	0	A_44_P374638	NM_024391	5038.09	364.065	4.106316e+001	5.092166e+000	102.5	32.5	8.290042e+000	0	0	0	0	0	0	38.7182	1	1	54.4085	31.2813
DATA	2100	25	60	0	0	A_64_P046416	A_64_P046416	5088.58	364.427	8.258165e+001	8.798457e+000	139	30	6.984015e+000	0	0	0	0	0	0	77.2411	1	1	57.5363	30.4
DATA	2101	25	61	0	0	A_44_P428560	NM_001001358	5114.38	364	5.476391e+001	6.267907e+000	111	33.5	8.690139e+000	0	0	0	0	0	0	51.0008	1	1	48.5334	34.5
DATA	2102	25	62	0	0	A_44_P208887	NM_001105774	5139.58	364.427	7.819719e+001	8.397730e+000	132.5	35	1.001809e+001	0	0	0	0	0	0	72.52	1	1	57.5363	36.8276
DATA	2103	25	63	0	0	A_42_P533792	NM_001106575	5164.74	364.264	1.099837e+004	1.099841e+003	9859.5	32	8.576713e+000	0	0	0	0	0	0	10155.8	1	1	47.5395	33.68
DATA	2104	25	64	0	0	A_42_P802550	NM_017365	5190.23	364.197	3.844535e+002	3.856922e+001	412	30	9.553359e+000	0	0	0	0	0	0	353.429	1	1	45.835	33
DATA	2105	25	65	0	0	A_42_P545129	ENSRNOT00000007554	5215.48	364.045	6.903095e+002	6.910063e+001	691	30	8.432140e+000	0	0	0	0	0	0	631.777	1	1	45.835	30.3793
DATA	2106	25	66	0	0	A_42_P500675	NM_013179	5241.56	364.265	4.567420e+002	4.578041e+001	482.5	33	9.799341e+000	0	0	0	0	0	0	416.097	1	1	46.8651	34.2069
DATA	2107	25	67	0	0	A_44_P127238	NM_001127655	5266.44	364.171	9.409520e+002	9.414727e+001	900	31	1.220156e+001	0	0	0	0	0	0	853.391	1	1	47.5395	31.8667
DATA	2108	25	68	0	0	A_64_P042142	ENSRNOT00000027371	5291.81	364.406	1.132517e+002	1.175374e+001	162	30	6.399405e+000	0	0	0	0	0	0	102.248	1	1	47.2035	30.2857
DATA	2109	25	69	0	0	A_44_P279756	NM_022848	5317.14	364.718	5.943808e+000	3.214678e+000	64.5	28	6.438627e+000	0	0	0	0	0	0	5.34203	1	0	47.5395	27.5484
DATA	2110	25	70	0	0	A_64_P119597	NM_001106871	5342.42	364.422	1.116203e+001	3.364536e+000	69.5	26.5	7.188701e+000	0	0	0	0	0	0	9.98537	1	0	45.1352	28
DATA	2111	25	71	0	0	A_44_P790674	NM_001191933	5368.33	364.5	2.201577e+001	3.875098e+000	78	33	9.587458e+000	0	0	0	0	0	0	19.6025	1	1	57.5363	34.125
DATA	2112	25	72	0	0	A_44_P405618	ENSRNOT00000025426	5393.3	364.319	2.300597e+002	2.322795e+001	256	29	7.500739e+000	0	0	0	0	0	0	203.905	1	1	46.8651	30.2414
DATA	2113	25	73	0	0	A_42_P719478	NM_001191779	5418.89	364.5	2.018829e+001	3.799195e+000	76.5	32	9.287522e+000	0	0	0	0	0	0	17.8108	1	1	56.9804	31.25
DATA	2114	25	74	0	0	A_64_P061424	A_64_P061424	5444.42	364.427	2.670549e+001	4.193621e+000	85.5	25.5	7.374700e+000	0	0	0	0	0	0	23.4516	1	1	57.5363	27.4
DATA	2115	25	75	0	0	A_44_P1042876	NM_212504	5469.44	364.479	2.266170e+003	2.266403e+002	1976	29	5.749963e+000	0	0	0	0	0	0	1981.14	1	1	48.2044	29.8
DATA	2116	25	76	0	0	A_44_P470043	NM_001108103	5495.11	364.5	9.105435e+001	9.672367e+000	139	31	9.229799e+000	0	0	0	0	0	0	79.239	1	1	56.9804	32.7568
DATA	2117	25	77	0	0	A_64_P108484	ENSRNOT00000046584	5520.5	364.5	3.891375e+001	5.087661e+000	95	27	8.010697e+000	0	0	0	0	0	0	33.7129	1	1	57.5363	28.3667
DATA	2118	25	78	0	0	A_42_P666065	NM_001014069	5545.78	364.61	4.736635e+002	4.748059e+001	453	29	7.249403e+000	0	0	0	0	0	0	408.567	1	1	49.8279	28.9
DATA	2119	25	79	0	0	A_64_P136571	NM_001134545	5571.21	364.562	9.348547e+001	9.915961e+000	137	29	7.535630e+000	0	0	0	0	0	0	80.2862	1	1	48.5334	30
DATA	2120	25	80	0	0	A_42_P816740	NM_001108705	5596.69	365.029	4.515655e+002	4.527843e+001	442.5	29.5	8.059256e+000	0	0	0	0	0	0	386.192	1	1	46.1809	31.875
DATA	2121	25	81	0	0	A_64_P018142	NM_001100716	5622.11	364.5	2.005474e+002	2.033004e+001	233	30	6.925409e+000	0	0	0	0	0	0	170.776	1	1	65	31.1935
DATA	2122	25	82	0	0	A_42_P779687	ENSRNOT00000034449	5647.44	364.466	8.599734e+003	8.599800e+002	6898.5	29	6.027357e+000	0	0	0	0	0	0	7293.25	1	1	49.1849	28.9355
DATA	2124	25	84	66	1	DarkCorner	DarkCorner	5698.42	364.573	3.387525e+000	3.374340e+000	50	32	8.368308e+000	0	0	0	0	0	0	-7.87194	0	0	57.5363	30.0286
DATA	2125	25	85	66	1	DarkCorner	DarkCorner	5723.99	364.716	3.400096e+000	3.386863e+000	59	25	5.482233e+000	0	0	0	0	0	0	-1.4714	0	0	49.1849	25.5366
DATA	2126	26	1	66	1	DarkCorner	DarkCorner	3603.38	370.625	3.083483e+000	3.071482e+000	57	30	8.102267e+000	0	0	0	0	0	0	-2.69544	0	0	48.2044	31.1395
DATA	2127	26	2	66	1	DarkCorner	DarkCorner	3628.58	370.573	3.068911e+000	3.056966e+000	57	27	6.915442e+000	0	0	0	0	0	0	-2.96418	0	0	57.5363	29.64
DATA	2128	26	3	0	0	A_42_P713844	NM_001106167	3653.72	371.029	1.130353e+003	1.130762e+002	1063	29.5	9.017913e+000	0	0	0	0	0	0	1054.86	1	1	46.1809	30.7143
DATA	2129	26	4	0	0	A_42_P627219	NM_001012468	3679.63	370.873	1.254621e+004	1.254625e+003	11577.5	32	9.141340e+000	0	0	0	0	0	0	11762.4	1	1	47.5395	32.8889
DATA	2130	26	5	0	0	A_42_P461003	NM_001044283	3704.72	371.029	1.263809e+004	1.263813e+003	11875.5	28	7.456044e+000	0	0	0	0	0	0	11900.7	1	1	46.1809	29.8519
DATA	2131	26	6	0	0	A_44_P1019923	NM_022522	3730.42	371.155	2.850596e+003	2.850754e+002	2688.5	31	7.834966e+000	0	0	0	0	0	0	2696.03	1	1	47.5395	31.6207
DATA	2132	26	7	0	0	A_42_P814056	NM_001108866	3755.65	370.8	1.036778e+004	1.036782e+003	9744	28.5	6.612778e+000	0	0	0	1	0	0	9845.65	1	1	51.7088	28.8929
DATA	2133	26	8	0	0	A_42_P795269	NM_001134730	3780.98	371.077	8.973030e+003	8.973079e+002	8639	31	7.433509e+000	0	0	0	0	0	0	8555.8	1	1	46.8651	31.9688
DATA	2134	26	9	0	0	A_42_P763522	NM_001013980	3806.07	370.732	3.803642e+003	3.803758e+002	3710	29	8.512691e+000	0	0	0	0	0	0	3640.52	1	1	47.5395	30.1818
DATA	2135	26	10	0	0	A_44_P292437	NM_153309	3831.57	370.833	2.339180e+002	2.357777e+001	280	29	1.309042e+001	0	0	0	0	0	0	224.732	1	1	47.8731	31.6774
DATA	2136	26	11	0	0	A_64_P065313	ENSRNOT00000042070	3857.14	371.085	1.152201e+002	1.189235e+001	170	29	7.913585e+000	0	0	0	0	0	0	111.1	1	1	44.0646	29.8205
DATA	2137	26	12	0	0	A_64_P008047	NM_001033670	3882.58	370.573	3.133969e+004	3.133970e+003	30231	29	7.053898e+000	0	0	0	0	0	0	30320.9	1	1	57.5363	28.6333
DATA	2138	26	13	0	0	A_64_P080612	TC638889	3908	370.545	4.685088e+003	4.685179e+002	4644	29	6.724682e+000	0	0	0	0	0	0	4547.66	1	1	55.8519	29.6957
DATA	2139	26	14	0	0	A_43_P17696	NM_001004257	3933.29	371.303	3.753707e+003	3.753820e+002	3630	31	8.143873e+000	0	0	0	0	0	0	3655.3	1	1	45.1352	30.5862
DATA	2140	26	15	0	0	A_64_P019608	NM_001105713	3958.55	371.099	4.897167e+002	4.905789e+001	543	28	9.242829e+000	0	0	0	0	0	0	478.268	1	1	47.8731	28.8667
DATA	2141	26	16	0	0	A_64_P108575	ENSRNOT00000046600	3984.42	370.573	3.744435e+001	4.735702e+000	97	32	8.524015e+000	0	0	0	0	0	0	36.6704	1	1	57.5363	31.6
DATA	2142	26	17	0	0	A_64_P136859	NM_001109642	4009.5	370.813	5.869669e+003	5.869740e+002	5891	30.5	8.757763e+000	0	0	0	0	0	0	5763.4	1	1	49.8279	33.5714
DATA	2143	26	18	0	0	A_64_P021597	A_64_P021597	4035.25	370.719	3.121214e+000	2.901454e+000	63	29	7.465101e+000	0	0	0	0	0	0	3.07228	1	0	45.1352	29.5143
DATA	2144	26	19	0	0	A_64_P148032	A_64_P148032	4060.21	370.983	2.275974e+002	2.294099e+001	301	29	7.647897e+000	0	0	0	0	0	0	224.538	1	1	43.3362	28.0968
DATA	2145	26	20	0	0	A_42_P743580	NM_017214	4085.7	370.9	1.098017e+004	1.098021e+003	10862	29	7.787915e+000	0	0	0	0	0	0	10855.3	1	1	47.2035	29.4194
DATA	2146	26	21	0	0	A_42_P693964	NM_181087	4110.79	371.194	3.442109e+003	3.442229e+002	3390	28	6.908449e+000	0	0	0	0	0	0	3409.56	1	1	47.5395	29.32
DATA	2147	26	22	0	0	A_44_P1058389	NM_012992	4136.53	371.12	1.697233e+004	1.697235e+003	16314	36	6.941722e+000	0	0	0	0	0	0	16841.5	1	1	48.8603	34
DATA	2148	26	23	0	0	A_44_P135224	NM_022187	4162	371	1.676871e+002	1.701036e+001	224	30.5	7.851379e+000	0	0	0	0	0	0	166.653	1	1	54.9904	30.9688
DATA	2149	26	24	0	0	A_64_P070249	ENSRNOT00000048236	4187.09	371.104	5.365639e+002	5.373219e+001	609	31	4.947710e+000	0	0	0	0	0	0	533.991	1	1	46.8651	30.6875
DATA	2150	26	25	0	0	A_42_P806899	NM_001108829	4212.41	371.375	4.002956e+001	4.913622e+000	97	27	6.761780e+000	0	0	0	0	0	0	39.8867	1	1	45.1352	26.6897
DATA	2151	26	26	0	0	A_42_P465144	NM_001107714	4238.1	370.942	5.568719e+001	6.254173e+000	113	27	5.009677e+000	0	0	0	0	0	0	55.5431	1	1	46.8651	27.4074
DATA	2152	26	27	0	0	A_43_P19712	NM_001106751	4263.53	370.811	1.244119e+001	3.104600e+000	74	28.5	7.830809e+000	0	0	0	0	0	0	12.4192	1	0	48.2044	29.0313
DATA	2153	26	28	0	0	A_42_P728472	NM_001007600	4288.56	371.028	7.014248e+003	7.014305e+002	6923	32	7.784379e+000	0	0	0	0	0	0	7006.55	1	1	48.2044	33.1786
DATA	2154	26	29	66	-1	(-)3xSLv1	NegativeControl	4314.51	371.113	2.852223e+000	2.841122e+000	58	33	8.215539e+000	0	0	0	0	0	0	-2.80452	0	0	47.8731	32.069
DATA	2155	26	30	0	0	A_42_P629394	NM_031683	4339.53	371.12	3.238178e+003	3.238303e+002	3158	26	7.063408e+000	0	0	0	0	0	0	3237.13	1	1	48.8603	27.2593
DATA	2156	26	31	0	0	A_64_P041977	A_64_P041977	4365.09	371.065	5.672045e+001	6.343334e+000	116	31	7.458794e+000	0	0	0	0	0	0	56.7077	1	1	54.4085	30.8857
DATA	2157	26	32	0	0	A_44_P126406	XM_228958	4390.29	371.246	8.377901e+003	8.377949e+002	8479	31	6.398923e+000	0	0	0	0	0	0	8375.53	1	1	45.1352	29.6286
DATA	2158	26	33	0	0	A_64_P021878	NM_001167664	4415.85	371	5.361312e+001	6.067538e+000	115.5	29	6.742517e+000	0	0	0	0	0	0	53.5826	1	1	46.8651	28.6667
DATA	2159	26	34	0	0	A_64_P058719	NM_001014175	4441.09	371.104	9.245259e+003	9.245303e+002	9143	30	4.561376e+000	0	0	0	0	0	0	9236.06	1	1	46.8651	29.6154
DATA	2160	26	35	0	0	A_42_P495579	NM_001107564	4466.29	371.088	3.769813e+002	3.780525e+001	420.5	31	6.674154e+000	0	0	0	0	0	0	376.375	1	1	45.835	31.4828
DATA	2161	26	36	0	0	A_64_P054979	NM_001109615	4492.29	370.836	7.358347e+001	7.889684e+000	135	30	8.024546e+000	0	0	0	0	0	0	73.4031	1	1	44.4243	31.68
DATA	2162	26	37	0	0	A_44_P713838	ENSRNOT00000032874	4517.5	371.352	1.255303e+002	1.287227e+001	189	31	7.151224e+000	0	0	0	0	0	0	125.108	1	1	57.5363	31.16
DATA	2163	26	38	0	0	A_64_P158913	NM_001108101	4542.58	371.427	9.472964e+000	3.005387e+000	69	29.5	7.584096e+000	0	0	0	0	0	0	9.43047	1	0	57.5363	30.5
DATA	2164	26	39	0	0	A_43_P13018	NM_054004	4568	371.271	1.769513e+004	1.769516e+003	17269	27.5	7.946734e+000	0	0	0	0	0	0	17592.2	1	1	46.8651	29.5667
DATA	2165	26	40	0	0	A_64_P114383	A_64_P114383	4593.57	371.392	2.056029e+004	2.056031e+003	20476	31	8.617201e+000	0	0	0	0	0	0	20410.2	1	1	49.1849	32.4483
DATA	2166	26	41	0	0	A_43_P16629	XM_001080634	4618.79	371	8.300804e+003	8.300853e+002	8178	33	7.296044e+000	0	0	0	0	0	0	8226.29	1	1	46.8651	31.9677
DATA	2167	26	42	0	0	A_42_P810313	NM_001108677	4644.42	371.427	7.851254e+001	8.359464e+000	138	32.5	7.245688e+000	0	0	0	0	0	0	77.668	1	1	57.5363	32.375
DATA	2168	26	43	0	0	A_42_P537516	NM_001106023	4669.74	371.222	1.376359e+004	1.376362e+003	13006	29	6.800735e+000	0	0	0	0	0	0	13588.2	1	1	47.5395	29.4
DATA	2169	26	44	0	0	A_64_P006964	A_64_P006964	4694.9	371.05	1.542149e+002	1.568852e+001	217.5	31.5	6.567072e+000	0	0	0	0	0	0	151.923	1	1	44.4243	31.3333
DATA	2170	26	45	0	0	A_42_P829251	NM_133381	4720.58	371.427	2.065361e+001	3.551211e+000	81.5	29.5	6.560360e+000	0	0	0	0	0	0	20.3001	1	1	57.5363	29.1471
DATA	2171	26	46	0	0	A_42_P687443	NM_020100	4746	371.455	1.281451e+002	1.313766e+001	185	30	4.456456e+000	0	0	0	0	0	0	125.642	1	1	55.8519	29.5
DATA	2172	26	47	0	0	A_44_P196146	NM_031349	4771.4	371.562	1.395420e+002	1.425307e+001	198	27	5.020988e+000	0	0	0	0	0	0	136.461	1	1	48.2044	27.1071
DATA	2173	26	48	0	0	A_64_P050137	ENSRNOT00000058586	4796.63	371.206	2.438822e+002	2.456141e+001	297	30.5	7.208442e+000	0	0	0	0	0	0	237.836	1	1	46.8651	30.5357
DATA	2174	26	49	0	0	A_44_P637827	NM_001108797	4821.99	371.183	3.766619e+003	3.766732e+002	3600.5	32.5	6.436962e+000	0	0	0	0	0	0	3662.6	1	1	46.8651	32.2813
DATA	2175	26	50	0	0	A_64_P070073	NM_001109590	4847.5	371.5	1.550586e+002	1.578004e+001	212	31	8.334671e+000	0	0	0	0	0	0	150.323	1	1	57.5363	32.2188
DATA	2176	26	51	0	0	A_64_P130572	NM_001109400	4872.66	371.271	1.174158e+003	1.174525e+002	1173	28	8.378616e+000	0	0	0	0	0	0	1134.7	1	1	47.5395	29.5135
DATA	2177	26	52	0	0	A_42_P658815	NM_198745	4898.12	371.338	1.105646e+003	1.106039e+002	1147.5	25	7.553338e+000	0	0	0	0	0	0	1064.97	1	1	45.4864	27.3571
DATA	2179	26	54	0	0	A_43_P14809	TC581403	4949.18	371.639	1.682253e+003	1.682515e+002	1657	30	7.468654e+000	0	0	0	0	0	0	1609.12	1	1	47.8731	32.069
DATA	2180	26	55	0	0	A_42_P553319	TC597248	4974.47	371.507	1.325057e+002	1.358138e+001	182.5	29	8.949488e+000	0	0	0	0	0	0	126.282	1	1	49.1849	30.48
DATA	2181	26	56	0	0	A_64_P004162	NM_019139	4999.59	371.939	3.160383e+000	3.006920e+000	65	30.5	8.972522e+000	0	0	0	0	0	0	3.00093	1	0	45.4864	30.8846
DATA	2182	26	57	0	0	A_64_P032450	NM_172330	5025.23	371.703	2.364746e+002	2.383725e+001	288	33	5.660010e+000	0	0	0	0	0	0	223.661	1	1	45.1352	32.9643
DATA	2183	26	58	0	0	A_44_P470976	NM_001013133	5050.73	371.672	2.911835e+001	4.190853e+000	89.5	29	5.661035e+000	0	0	0	0	0	0	27.4311	1	1	46.1809	28.2258
DATA	2184	26	59	0	0	A_64_P166428	NM_001037205	5076.32	371.444	1.313085e+002	1.347512e+001	182	30	8.134639e+000	0	0	0	0	0	0	123.191	1	1	44.4243	30.7879
DATA	2185	26	60	0	0	A_43_P11576	NM_012821	5101.5	371.5	1.096862e+001	3.230802e+000	70	33.5	7.394935e+000	0	0	0	0	0	0	10.2485	1	0	57.5363	32.9333
DATA	2186	26	61	0	0	A_64_P156910	A_64_P156910	5126.89	371.5	1.871490e+002	1.896208e+001	233	42	1.229884e+001	0	0	0	0	0	0	174.126	1	1	56.9804	41.3077
DATA	2187	26	62	0	0	A_64_P126140	NM_001191648	5152.42	371.573	7.676507e+001	8.265736e+000	134	35	8.887819e+000	0	0	0	0	0	0	71.1169	1	1	57.5363	35.92
DATA	2188	26	63	0	0	A_42_P637122	NM_001108351	5177.54	371.882	2.899157e+003	2.899321e+002	2738.5	34	1.073217e+001	0	0	0	1	0	0	2674.44	1	1	49.8279	36.2222
DATA	2189	26	64	0	0	A_64_P081208	NM_001009712	5202.81	371.588	1.210587e+004	1.210591e+003	10643.5	30	5.919826e+000	0	0	0	0	0	0	11118.1	1	1	46.5243	30.5172
DATA	2190	26	65	0	0	A_42_P465608	NM_130894	5228.57	371.392	3.191480e+003	3.191631e+002	2943	34	9.219795e+000	0	0	0	0	0	0	2917.75	1	1	49.1849	32.7308
DATA	2191	26	66	0	0	A_42_P485589	NM_017246	5253.46	371.417	8.085989e+001	8.666861e+000	137	30	6.968408e+000	0	0	0	0	0	0	73.5994	1	1	48.2044	29.0606
DATA	2192	26	67	0	0	A_64_P031383	NM_020308	5279.25	371.627	4.768659e+002	4.778945e+001	490.5	30	5.759669e+000	0	0	0	0	0	0	432.068	1	1	49.1849	30.5926
DATA	2193	26	68	0	0	A_44_P220647	NM_001107097	5304.64	371.826	6.490698e+001	7.213813e+000	120.5	30	9.196557e+000	0	0	0	0	0	0	58.5439	1	1	46.8651	31.08
DATA	2194	26	69	0	0	A_44_P294687	NM_080885	5329.96	371.855	3.051463e+002	3.067806e+001	333	28	7.737216e+000	0	0	0	0	0	0	273.979	1	1	46.8651	28.2581
DATA	2195	26	70	0	0	A_42_P512838	NM_001106884	5355.41	371.753	1.354276e+003	1.354649e+002	1204	28	7.797173e+000	0	0	0	0	0	0	1210.34	1	1	48.5334	28.1471
DATA	2196	26	71	0	0	A_42_P635228	NM_001107651	5380.9	371.836	5.952897e+001	6.754539e+000	115	31	7.900184e+000	0	0	0	0	0	0	52.9584	1	1	46.1809	32.7097
DATA	2197	26	72	0	0	A_44_P254687	NM_001105728	5406.39	371.931	2.340593e+002	2.362453e+001	272	32	8.761032e+000	0	0	0	0	0	0	207.272	1	1	53.8203	31.4545
DATA	2198	26	73	0	0	A_64_P049628	NM_001169145	5431.5	371.735	6.793796e+003	6.793872e+002	5858.5	26.5	8.130142e+000	0	0	0	0	0	0	5988.91	1	1	46.5243	26.8929
DATA	2199	26	74	0	0	A_64_P007703	NM_031674	5457.22	371.734	1.493416e+002	1.528070e+001	193	30	6.513344e+000	0	0	0	0	0	0	131.044	1	1	45.1352	30.931
DATA	2200	26	75	0	0	A_42_P645376	NM_001014135	5482.55	371.917	3.305448e+004	3.305450e+003	28195	30	6.311648e+000	0	0	0	0	0	0	28875.5	1	1	49.8279	30.7353
DATA	2201	26	76	0	0	A_64_P040920	XM_577408	5507.91	371.896	4.472489e+003	4.472608e+002	3904	29	7.658685e+000	0	0	0	0	0	0	3889.63	1	1	46.8651	30.1429
DATA	2202	26	77	0	0	A_42_P819656	NM_130409	5532.83	372	3.932654e+003	3.932790e+002	3342	29	7.032456e+000	0	0	0	0	0	0	3405.45	1	1	46.8651	28.6176
DATA	2203	26	78	0	0	A_64_P018921	NM_001135012	5558.35	372.067	5.506262e+002	5.516102e+001	529	30	7.830344e+000	0	0	0	0	0	0	474.738	1	1	49.1849	31.7429
DATA	2204	26	79	0	0	A_43_P15253	NM_012967	5584.01	371.895	2.643753e+002	2.664364e+001	286.5	29	6.328552e+000	0	0	0	0	0	0	226.947	1	1	47.2035	28.5333
DATA	2205	26	80	0	0	A_64_P093063	NM_001136272	5609.28	371.855	5.041358e+002	5.052288e+001	472	29.5	9.208921e+000	0	0	0	0	0	0	430.96	1	1	46.1809	31.2857
DATA	2206	26	81	0	0	A_44_P477406	NM_012751	5634.7	371.971	3.306759e+002	3.323534e+001	337	30	6.078509e+000	0	0	0	0	0	0	281.529	1	1	46.1809	28.5
DATA	2207	26	82	0	0	A_64_P056816	NM_001100697	5660.1	372.052	8.579197e+001	9.209454e+000	126	30	8.662987e+000	0	0	0	0	0	0	72.7515	1	1	48.2044	31.1212
DATA	2208	26	83	0	0	A_42_P580733	NM_001006981	5685.56	371.973	5.124648e+003	5.124758e+002	4317	33	8.087355e+000	0	0	0	0	0	0	4328.77	1	1	48.5334	32.0303
DATA	2209	26	84	66	1	DarkCorner	DarkCorner	5711.57	371.984	3.387524e+000	3.374340e+000	54	27	7.360187e+000	0	0	0	0	0	0	-4.57833	0	0	44.0646	28.2121
DATA	2210	26	85	66	1	DarkCorner	DarkCorner	5736.57	372.224	3.399342e+000	3.394305e+000	60	25	6.221873e+000	0	0	0	0	0	0	1.97645	0	0	46.5243	25.2459
DATA	2211	27	1	66	1	DarkCorner	DarkCorner	3590.44	377.886	3.970479e+000	3.100287e+000	63	26	6.999356e+000	0	0	0	0	0	0	3.66655	1	0	47.5395	26.1818
DATA	2212	27	2	66	1	DarkCorner	DarkCorner	3616	377.545	3.072102e+000	3.060145e+000	55	28	5.420392e+000	0	0	0	0	0	0	-4.04977	0	0	55.8519	29.2258
DATA	2213	27	3	0	0	A_44_P289922	NM_139103	3641.37	378.265	2.905452e+002	2.921369e+001	326	31	7.483505e+000	0	0	0	0	0	0	270.887	1	1	46.5243	30.1852
DATA	2214	27	4	0	0	A_64_P117149	ENSRNOT00000065538	3666.58	377.573	6.870887e+000	3.108904e+000	66	28	6.080738e+000	0	0	0	0	0	0	6.43436	1	0	57.5363	29.2414
DATA	2215	27	5	0	0	A_42_P524308	NM_019213	3692.21	378.044	8.467209e+002	8.472586e+001	827	32	1.030485e+001	0	0	0	0	0	0	796.563	1	1	46.5243	34.24
DATA	2216	27	6	0	0	A_64_P037562	XM_001070892	3717.43	378.103	4.811154e+002	4.820531e+001	522	30	6.528046e+000	0	0	0	0	0	0	454.569	1	1	46.5243	30
DATA	2217	27	7	0	0	A_44_P267706	XR_085883	3742.91	377.935	1.531439e+001	3.361753e+000	75	30	6.531163e+000	0	0	0	0	0	0	14.53	1	1	65	31.2857
DATA	2218	27	8	0	0	A_64_P082569	XM_001053354	3768.5	378	1.139689e+001	3.190886e+000	71	29	7.536156e+000	0	0	0	0	0	0	10.8576	1	0	54.1152	29.1429
DATA	2219	27	9	0	0	A_64_P000539	NM_053930	3793.64	377.825	2.012594e+004	2.012596e+003	19513	30	6.061353e+000	0	0	0	0	0	0	19247.8	1	1	49.5074	30.64
DATA	2220	27	10	0	0	A_43_P22124	NM_213625	3818.91	377.913	1.036224e+003	1.036646e+002	1070	29	1.155779e+001	0	0	0	0	0	0	994.761	1	1	46.8651	30.973
DATA	2221	27	11	0	0	A_44_P1012556	NM_001013988	3844.22	378	1.285698e+002	1.319041e+001	183.5	30	8.940883e+000	0	0	0	0	0	0	123.875	1	1	46.1809	29.7576
DATA	2222	27	12	0	0	A_64_P115457	NM_001106361	3870	378	1.634241e+002	1.660416e+001	223	29	7.331286e+000	0	0	0	0	0	0	158.014	1	1	54.9904	28.4054
DATA	2223	27	13	0	0	A_64_P064229	A_64_P064229	3895.44	377.73	3.897145e+001	4.873881e+000	99	28	7.062364e+000	0	0	0	0	0	0	37.8058	1	1	44.0646	29.6071
DATA	2224	27	14	0	0	A_64_P039066	ENSRNOT00000041345	3920.6	378.014	6.436009e+001	7.066460e+000	125	29	6.699127e+000	0	0	0	0	0	0	62.634	1	1	48.5334	29.7143
DATA	2225	27	15	0	0	A_42_P574960	ENSRNOT00000068719	3945.89	378.143	6.351764e+002	6.358421e+001	678.5	28.5	8.225895e+000	0	0	0	0	0	0	620.009	1	1	46.8651	28.0357
DATA	2226	27	16	0	0	A_42_P600215	NM_175844	3971.28	378.29	3.510655e+001	4.553871e+000	93	29	7.242943e+000	0	0	0	0	0	0	34.3667	1	1	46.8651	28.9091
DATA	2227	27	17	0	0	A_42_P607770	NM_001134616	3996.44	378.027	1.165643e+004	1.165647e+003	11103	31	9.869412e+000	0	0	0	0	0	0	11440.8	1	1	48.5334	34.0303
DATA	2228	27	18	0	0	A_64_P003348	NM_001077660	4022	378	4.141767e+002	4.151807e+001	467	29	7.212501e+000	0	0	0	0	0	0	407.543	1	1	46.8651	29.2571
DATA	2229	27	19	0	0	A_64_P057828	A_64_P057828	4047.58	378	9.707447e+002	9.711715e+001	1016	27	6.792888e+000	0	0	0	0	0	0	957.456	1	1	43.7019	26.68
DATA	2230	27	20	0	0	A_64_P081765	NM_134355	4073.09	378.065	3.567825e+001	4.580468e+000	95	30	7.080569e+000	0	0	0	0	0	0	35.2669	1	1	54.4085	30.4286
DATA	2231	27	21	0	0	A_42_P758886	NM_019258	4098.33	378.094	2.684897e+002	2.700159e+001	328	28	7.623014e+000	0	0	0	0	0	0	265.922	1	1	45.1352	29.6
DATA	2232	27	22	0	0	A_42_P745470	XM_001066818	4123.67	378.25	1.071479e+004	1.071483e+003	10497	31.5	7.076584e+000	0	0	0	0	0	0	10631.8	1	1	47.5395	32.1786
DATA	2233	27	23	0	0	A_42_P800949	NM_031787	4149.06	378.389	3.353028e+002	3.365176e+001	390.5	33	7.955086e+000	0	0	0	0	0	0	333.258	1	1	48.2044	32.9231
DATA	2234	27	24	0	0	A_42_P738559	NM_012801	4174.57	378.608	1.951426e+004	1.951428e+003	19293.5	27	4.003332e+000	0	0	0	0	0	0	19424.3	1	1	49.1849	28.12
DATA	2235	27	25	0	0	A_42_P749550	NM_001109359	4199.87	378.229	4.011418e+003	4.011519e+002	4062.5	29	6.898616e+000	0	0	0	0	0	0	3997.86	1	1	46.5243	28.5
DATA	2236	27	26	0	0	A_64_P007493	ENSRNOT00000006658	4225.43	378	2.135864e+001	3.558271e+000	81	28.5	5.976586e+000	0	0	0	0	0	0	21.3095	1	1	48.5334	27.6429
DATA	2237	27	27	0	0	A_64_P056182	NM_053363	4250.54	378.386	1.651325e+003	1.651569e+002	1671.5	27.5	7.003755e+000	0	0	0	0	0	0	1649.1	1	1	47.5395	28.0882
DATA	2238	27	28	0	0	A_42_P818546	NM_001191600	4276.17	378.171	7.834668e+002	7.839818e+001	858	32.5	8.795506e+000	0	0	0	0	0	0	782.975	1	1	46.8651	31.4667
DATA	2239	27	29	0	0	A_44_P407948	XM_001055260	4301.24	378.494	3.634368e+001	4.612104e+000	97	32.5	7.409775e+000	0	0	0	0	0	0	36.3421	1	1	50.4627	32.6429
DATA	2240	27	30	66	-1	(-)3xSLv1	NegativeControl	4327	378.455	2.849542e+000	2.838452e+000	52	31	7.678099e+000	0	0	0	0	0	0	-9.10354	0	0	65	30.8966
DATA	2241	27	31	0	0	A_64_P044505	NM_031587	4352.5	378.5	2.636496e+002	2.651726e+001	330	28	7.942332e+000	0	0	0	0	0	0	263.789	1	1	49.1849	29.375
DATA	2242	27	32	0	0	A_42_P685138	NM_153621	4377.63	378.64	7.592891e+002	7.598192e+001	798.5	29	5.735877e+000	0	0	0	0	0	0	759.709	1	1	48.8603	29.8519
DATA	2243	27	33	0	0	A_64_P121747	ENSRNOT00000050332	4402.89	378.268	8.713404e+000	2.969145e+000	71	30.5	5.970019e+000	0	0	0	0	0	0	8.71642	1	0	47.5395	30.1875
DATA	2244	27	34	0	0	A_42_P791436	NM_012750	4428.36	378.13	1.711374e+003	1.711609e+002	1753	31	8.860933e+000	0	0	0	0	0	0	1711.34	1	1	46.8651	30.75
DATA	2245	27	35	0	0	A_44_P349309	NM_001100890	4454	378.455	2.449205e+002	2.465626e+001	303.5	29	5.416026e+000	0	0	0	0	0	0	244.793	1	1	55.8519	29.1111
DATA	2246	27	36	0	0	A_42_P502621	NM_024401	4479.25	378.328	1.009408e+002	1.048678e+001	164	30	6.324945e+000	0	0	0	0	0	0	100.816	1	1	46.1809	31.8276
DATA	2247	27	37	0	0	A_43_P21574	NM_001012043	4504.58	378.427	5.826212e+001	6.483901e+000	118.5	32	6.832135e+000	0	0	0	0	0	0	58.1394	1	1	57.5363	32.7037
DATA	2248	27	38	0	0	A_44_P496331	NM_001001085	4529.91	378.908	8.653048e+001	9.109761e+000	149	31.5	6.978208e+000	0	0	0	0	0	0	86.2615	1	1	46.1809	31.8462
DATA	2249	27	39	0	0	A_64_P016503	ENSRNOT00000003659	4555.5	378.5	1.019742e+002	1.058871e+001	163	28.5	7.045093e+000	0	0	0	0	0	0	101.527	1	1	57.5363	29.5667
DATA	2250	27	40	0	0	A_43_P13270	NM_134415	4580.69	378.662	2.745272e+004	2.745273e+003	27274.5	31.5	7.852926e+000	0	0	0	0	0	0	27294.8	1	1	48.5334	32.7059
DATA	2251	27	41	0	0	A_42_P553960	NM_001107831	4606.25	378.5	1.229053e+004	1.229057e+003	11842.5	31	8.510932e+000	0	0	0	0	0	0	12200.3	1	1	48.5334	32.3103
DATA	2252	27	42	0	0	A_44_P428997	NM_001107661	4631.33	378.542	4.113772e+002	4.123739e+001	467.5	31	8.792734e+000	0	0	0	0	0	0	407.659	1	1	48.2044	32.1429
DATA	2253	27	43	0	0	A_42_P619926	NM_001106578	4657.11	378.5	8.238291e+001	8.724170e+000	145.5	31	5.810640e+000	0	0	0	0	0	0	81.4806	1	1	56.9804	29.9259
DATA	2255	27	45	0	0	A_44_P524471	NM_001106408	4707.73	378.863	1.072244e+003	1.072632e+002	1085.5	31	7.441980e+000	0	0	0	0	0	0	1056.03	1	1	48.2044	31.3125
DATA	2256	27	46	0	0	A_43_P10009	XM_347035	4733.25	378.627	6.170466e+003	6.170534e+002	6158	28.5	6.563220e+000	0	0	0	0	0	0	6062.5	1	1	46.1809	28.4
DATA	2257	27	47	0	0	A_64_P068112	A_64_P068112	4758.73	379.161	1.061685e+004	1.061689e+003	11270	30	4.252782e+000	0	0	0	0	0	0	10405.3	1	1	44.7812	30.6154
DATA	2258	27	48	0	0	A_44_P191715	NM_021666	4783.89	378.661	2.916306e+000	2.904959e+000	62	28	7.011635e+000	0	0	0	0	0	0	0.0432505	0	0	44.7812	29.1143
DATA	2259	27	49	0	0	A_64_P035769	NM_001108962	4809.39	378.594	1.597938e+003	1.598203e+002	1632	32	7.005195e+000	0	0	0	0	0	0	1557.45	1	1	47.5395	31.5357
DATA	2260	27	50	0	0	A_64_P158469	XM_579990	4834.67	378.5	5.363514e+000	2.970632e+000	66	33	6.194430e+000	0	0	0	0	0	0	5.21222	1	0	57.5363	32.875
DATA	2261	27	51	0	0	A_43_P12811	NM_053464	4860.07	378.662	2.366680e+003	2.366862e+002	2305	30	8.664606e+000	0	0	0	0	0	0	2292.87	1	1	45.835	30.6944
DATA	2262	27	52	0	0	A_44_P370694	NM_001107961	4885.63	378.231	1.397337e+001	3.255594e+000	76	30.5	7.042334e+000	0	0	0	0	0	0	13.4931	1	0	41.0736	31.2647
DATA	2263	27	53	0	0	A_42_P749550	NM_001109359	4911.03	378.863	4.031118e+003	4.031226e+002	3809	29	1.077828e+001	0	0	0	0	0	0	3879.87	1	1	46.8651	31.6333
DATA	2264	27	54	0	0	A_64_P125893	ENSRNOT00000021391	4936.56	378.973	1.957618e+004	1.957620e+003	18366	34.5	7.666092e+000	0	0	0	0	0	0	18776.4	1	1	48.5334	35.3
DATA	2265	27	55	0	0	A_44_P1000653	NM_031531	4961.58	378.573	1.299929e+002	1.333447e+001	186	29	1.082301e+001	0	0	0	0	0	0	124.236	1	1	57.5363	31.7857
DATA	2266	27	56	0	0	A_64_P035992	A_64_P035992	4987.58	379.172	5.861249e+002	5.868829e+001	632.5	30	9.325048e+000	0	0	0	0	0	0	558.102	1	1	44.7812	31.5
DATA	2267	27	57	0	0	A_42_P592385	NM_022935	5012.58	378.573	7.992104e+000	3.098230e+000	69	34.5	6.882307e+000	0	0	0	0	0	0	7.58099	1	0	57.5363	34.6154
DATA	2268	27	58	0	0	A_64_P065624	ENSRNOT00000039260	5038	378.545	7.220812e+000	3.090615e+000	65.5	30	6.525993e+000	0	0	0	0	0	0	6.82269	1	0	65	30.5405
DATA	2269	27	59	0	1	ERCC-00097_63	ERCC-00097_63	5063.79	379.19	4.946239e+001	5.793750e+000	109	28	6.362356e+000	0	0	0	0	0	0	46.5507	1	1	43.7019	28.2903
DATA	2270	27	60	0	0	A_42_P477625	NM_001108719	5088.79	378.806	4.433830e+003	4.433934e+002	4108	34	8.818026e+000	0	0	0	0	0	0	4155.89	1	1	47.5395	33.5152
DATA	2271	27	61	0	0	A_42_P788030	NM_031618	5114.39	378.931	2.459049e+004	2.459051e+003	22576.5	35.5	1.070723e+001	0	0	0	0	0	0	22953.1	1	1	53.8203	36.9
DATA	2272	27	62	0	0	A_44_P278247	XM_219377	5139.44	378.973	8.835627e+003	8.835680e+002	7995	37.5	9.963626e+000	0	0	0	0	0	0	8213.03	1	1	48.5334	38.9231
DATA	2273	27	63	0	0	A_44_P189262	NM_024000	5164.67	378.962	1.603422e+004	1.603425e+003	14530	34	8.931198e+000	0	0	0	0	0	0	14840.9	1	1	49.1849	35.875
DATA	2274	27	64	0	0	A_44_P212850	NM_019305	5190.5	379	4.314383e+001	5.301730e+000	98	36	1.057030e+001	0	0	0	0	0	0	39.7567	1	1	54.1152	36.7419
DATA	2275	27	65	0	0	A_64_P144278	NM_001106525	5215.64	378.87	1.407242e+004	1.407246e+003	12553	34	8.165938e+000	0	0	0	0	0	0	12910.9	1	1	46.8651	33.6429
DATA	2276	27	66	0	0	A_44_P683816	NM_001127488	5241.06	378.864	1.544258e+002	1.575237e+001	201	28	6.571432e+000	0	0	0	0	0	0	141.049	1	1	46.1809	27.9394
DATA	2277	27	67	0	0	A_64_P048712	A_64_P048712	5266.78	379.104	6.653856e+001	7.350181e+000	123	30	5.886175e+000	0	0	0	0	0	0	60.5016	1	1	45.835	29
DATA	2278	27	68	0	0	A_64_P012813	NM_001106456	5292.23	379.072	7.594650e+000	3.227543e+000	64.5	30	4.396145e+000	0	0	0	0	0	0	6.87433	1	0	46.5243	30.25
DATA	2280	27	70	0	0	A_42_P598602	NM_001077646	5342.5	379	2.854958e+001	4.262645e+000	87	25	7.283323e+000	0	0	0	0	0	0	25.6098	1	1	54.1152	25.7586
DATA	2281	27	71	0	0	A_44_P375380	NM_001191572	5368.23	379.212	9.090711e+001	9.630815e+000	141.5	28	9.394999e+000	0	0	0	0	0	0	81.1735	1	1	45.835	30.8621
DATA	2282	27	72	0	0	A_64_P113555	NM_001000025	5393.5	379	1.312040e+001	3.453407e+000	71	30	8.147432e+000	0	0	0	0	0	0	11.6621	1	0	65	31.2258
DATA	2283	27	73	0	0	A_42_P590466	NM_001009676	5418.87	378.9	4.771966e+003	4.772074e+002	4038	30	9.795918e+000	0	0	0	0	0	0	4222.25	1	1	46.8651	30.72
DATA	2284	27	74	0	0	A_44_P224987	XM_001058317	5444.47	378.849	4.952589e+001	5.909386e+000	101	30	7.157024e+000	0	0	0	0	0	0	43.6208	1	1	47.8731	29.5333
DATA	2285	27	75	0	0	A_42_P557315	NM_001106280	5469.72	378.905	5.988903e+003	5.988991e+002	5038.5	31	5.886715e+000	0	0	0	1	0	0	5251.37	1	1	48.8603	30.8182
DATA	2286	27	76	0	0	A_44_P375364	A_44_P375364	5495.09	379.065	8.245022e+001	8.863365e+000	130	28.5	7.422449e+000	0	0	0	0	0	0	71.9777	1	1	65	29.4375
DATA	2287	27	77	0	0	A_44_P880152	NM_031553	5520.69	379	1.348681e+002	1.387687e+001	181	30	7.496337e+000	0	0	0	0	0	0	117.214	1	1	47.8731	31.1515
DATA	2288	27	78	0	0	A_64_P057575	NM_001191967	5545.91	379.386	1.510805e+002	1.546018e+001	187.5	31	8.889646e+000	0	0	0	0	0	0	130.75	1	1	57.259	32.6774
DATA	2289	27	79	0	0	A_64_P122183	ENSRNOT00000009823	5571.42	379.562	5.390259e+001	6.317521e+000	105	29.5	7.825393e+000	0	0	0	0	0	0	46.4512	1	1	48.5334	30.9333
DATA	2290	27	80	0	0	A_64_P057587	NM_019313	5596.58	379.427	7.803708e+001	8.476161e+000	127.5	31	8.336389e+000	0	0	0	0	0	0	66.9684	1	1	57.5363	32.1538
DATA	2291	27	81	0	0	A_42_P480769	XM_001081609	5622	379.455	4.615610e+002	4.627551e+001	436	29	5.385851e+000	0	0	0	0	0	0	394.473	1	1	55.8519	29.3103
DATA	2292	27	82	0	0	A_42_P623151	NM_031026	5647.71	379.214	3.024645e+004	3.024647e+003	25214	30	5.449982e+000	0	0	0	1	0	0	25744	1	1	51.4001	29.4333
DATA	2293	27	83	0	0	A_42_P550241	NM_022954	5672.58	379.427	1.679892e+001	3.746307e+000	74	31	8.707244e+000	0	0	0	0	0	0	14.2446	1	1	57.5363	31.3333
DATA	2294	27	84	66	1	DarkCorner	DarkCorner	5698.42	379.427	3.374549e+000	3.361415e+000	55	29	6.333729e+000	0	0	0	0	0	0	-4.26013	0	0	57.5363	30.129
DATA	2295	27	85	66	1	DarkCorner	DarkCorner	5723.82	379.521	3.386755e+000	3.373573e+000	58	26	6.304373e+000	0	0	0	0	0	0	-0.627062	0	0	47.8731	27.1707
DATA	2296	28	1	66	1	DarkCorner	DarkCorner	3603.55	385.44	3.074690e+000	3.062723e+000	56.5	28	6.631036e+000	0	0	0	0	0	0	-2.93895	0	0	49.5074	27.9722
DATA	2297	28	2	0	0	A_42_P802550	NM_017365	3628.58	385.427	4.071825e+002	4.083221e+001	440	30	1.175498e+001	0	0	0	0	0	0	379.244	1	1	57.5363	32.8889
DATA	2299	28	4	0	0	A_42_P619926	NM_001106578	3679.42	385.427	8.571592e+001	9.088388e+000	139	30	7.903041e+000	0	0	0	0	0	0	80.5624	1	1	57.5363	31.5161
DATA	2300	28	5	0	0	A_64_P052441	ENSRNOT00000004876	3704.57	385.551	7.624247e+001	8.196158e+000	133	30	9.127220e+000	0	0	0	0	0	0	71.9697	1	1	47.2035	28.8846
DATA	2301	28	6	0	0	A_64_P056823	CA510211	3730.13	385.514	1.116766e+001	3.196635e+000	71.5	29	8.534669e+000	0	0	0	0	0	0	10.5867	1	0	47.8731	31.1667
DATA	2302	28	7	0	0	A_42_P669870	NM_001011919	3755.56	385.532	4.291394e+003	4.291498e+002	4122.5	31	7.065013e+000	0	0	0	0	0	0	4084.88	1	1	49.8279	30.4054
DATA	2303	28	8	0	0	A_42_P683634	NM_012946	3781	385.455	6.508432e+004	6.508432e+003	62364.5	31.5	8.210170e+000	0	0	0	0	0	0	62197.9	1	1	55.8519	31.8
DATA	2304	28	9	0	0	A_42_P542809	NM_021671	3806.2	385.31	4.169315e+002	4.179809e+001	450	29.5	9.755182e+000	0	0	0	0	0	0	399.946	1	1	47.2035	31.1579
DATA	2305	28	10	0	0	A_64_P065887	ENSRNOT00000024693	3831.63	385.36	1.317675e+002	1.350274e+001	188	30	8.532358e+000	0	0	0	0	0	0	126.867	1	1	48.8603	30.3636
DATA	2306	28	11	0	0	A_64_P043406	NM_001024902	3856.91	385.56	1.120454e+003	1.120839e+002	1125	30	8.079761e+000	0	0	0	0	0	0	1082.62	1	1	48.8603	30.4444
DATA	2307	28	12	0	0	A_64_P060769	NM_001191090	3882.65	385.533	1.794545e+003	1.794784e+002	1889	30	7.581089e+000	0	0	0	0	0	0	1739.89	1	1	42.5954	31.4828
DATA	2308	28	13	0	0	A_64_P150789	A_64_P150789	3907.67	385.506	1.304195e+001	3.197389e+000	72.5	28.5	8.031436e+000	0	0	0	0	0	0	12.6849	1	0	51.7088	30.1944
DATA	2309	28	14	0	0	A_64_P110254	NM_022404	3933.31	385.662	9.550576e+003	9.550620e+002	9231	31	5.376917e+000	0	0	0	0	0	0	9318.16	1	1	48.5334	31.7083
DATA	2310	28	15	0	0	A_42_P700753	FQ212883	3958.44	385.534	2.348333e+003	2.348512e+002	2295	31	6.985259e+000	0	0	0	0	0	0	2297.75	1	1	49.1849	31.0769
DATA	2311	28	16	0	0	A_42_P503768	NM_001009466	3984.16	385.547	3.547878e+002	3.559660e+001	412	29	7.410578e+000	0	0	0	0	0	0	348.113	1	1	49.5074	29.6667
DATA	2312	28	17	0	0	A_64_P106021	ENSRNOT00000017892	4009.5	385.5	1.293301e+002	1.325119e+001	187	30	7.782113e+000	0	0	0	0	0	0	127.223	1	1	57.5363	32.8065
DATA	2313	28	18	0	0	A_43_P10861	NM_001024879	4034.89	385.5	2.007513e+002	2.028059e+001	261	30	7.749756e+000	0	0	0	0	0	0	197.957	1	1	56.9804	29.9394
DATA	2314	28	19	0	0	A_44_P562251	BF545174	4060.08	385.247	1.219003e+002	1.252406e+001	185	30	7.839410e+000	0	0	0	0	0	0	120.467	1	1	47.8731	32.0278
DATA	2315	28	20	0	0	A_42_P608768	ENSRNOT00000009898	4085.69	385.389	1.891799e+002	1.913402e+001	247	28.5	4.809473e+000	0	0	0	0	0	0	187.35	1	1	48.2044	30.2
DATA	2316	28	21	0	0	A_64_P117115	NM_001109329	4111.33	385.5	2.302465e+001	3.672907e+000	83	28	5.975731e+000	0	0	0	0	0	0	22.8458	1	1	57.5363	28.931
DATA	2317	28	22	0	0	A_64_P043331	ENSRNOT00000032411	4136.5	385.5	1.369257e+002	1.398741e+001	194	32	7.662305e+000	0	0	0	0	0	0	136.093	1	1	57.5363	31.6286
DATA	2318	28	23	0	0	A_42_P664274	NM_001079705	4161.89	385.5	1.445158e+003	1.445440e+002	1492	30	7.803614e+000	0	0	0	0	0	0	1438.59	1	1	56.9804	30.2162
DATA	2319	28	24	0	0	A_64_P044593	NM_001173451	4187.17	385.957	4.872199e+002	4.880518e+001	543	28.5	5.623125e+000	0	0	0	0	0	0	485.686	1	1	46.8651	27.9667
DATA	2320	28	25	0	0	A_64_P006978	NM_001109371	4212.58	385.573	4.049921e+001	4.949398e+000	102	30	8.850612e+000	0	0	0	0	0	0	40.4178	1	1	57.5363	31.2222
DATA	2321	28	26	0	0	A_64_P119390	NM_001109519	4238.11	385.5	2.520185e+001	3.798664e+000	86	27	7.191872e+000	0	0	0	0	0	0	25.1763	1	1	56.9804	28.3611
DATA	2322	28	27	0	0	A_64_P034714	A_64_P034714	4263.5	385.648	3.135521e+001	4.230425e+000	91	25.5	8.200435e+000	0	0	0	0	0	0	31.3497	1	1	57.5363	27.8333
DATA	2323	28	28	0	0	A_44_P535959	NM_001107650	4288.57	385.587	2.297799e+002	2.315260e+001	297.5	32.5	5.934272e+000	0	0	0	0	0	0	229.883	1	1	45.1352	32.4583
DATA	2324	28	29	0	0	A_64_P286274	ENSRNOT00000055318	4314.47	385.931	1.821063e+002	1.843025e+001	242	33.5	5.290818e+000	0	0	0	0	0	0	182.28	1	1	48.2044	33.4167
DATA	2325	28	30	0	0	A_44_P333384	NM_001024788	4339.7	386.152	2.511068e+001	3.787804e+000	84	32	7.702247e+000	0	0	0	0	0	0	25.1421	1	1	45.835	32.7308
DATA	2326	28	31	0	0	A_42_P522194	NM_012914	4364.96	386.027	1.916021e+002	1.936890e+001	252	28	5.428111e+000	0	0	0	0	0	0	191.858	1	1	46.8651	28.8148
DATA	2327	28	32	0	0	A_44_P273859	NM_017021	4390.19	385.836	5.739550e+000	2.893388e+000	68.5	32	7.359668e+000	0	0	0	0	0	0	5.74665	1	0	46.1809	32.2
DATA	2328	28	33	0	0	A_43_P11665	NM_013024	4415.54	385.386	5.247011e+001	5.964756e+000	112	30.5	6.455464e+000	0	0	0	0	0	0	52.5189	1	1	47.5395	30.3889
DATA	2329	28	34	0	0	A_64_P118273	NM_001170593	4441.29	385.565	6.176031e+001	6.796870e+000	121.5	32	8.527482e+000	0	0	0	0	0	0	61.7913	1	1	43.7019	30.8889
DATA	2330	28	35	0	0	A_42_P762814	NM_031318	4466.27	385.7	5.548172e+003	5.548245e+002	5370	29	4.249777e+000	0	0	0	0	0	0	5547.66	1	1	46.8651	30.1818
DATA	2331	28	36	0	0	A_44_P384017	NM_031688	4491.66	385.815	4.073861e+002	4.083762e+001	472	33	6.246378e+000	0	0	0	0	0	0	407.031	1	1	45.4864	32.5
DATA	2332	28	37	0	0	A_64_P118872	A_64_P118872	4517.27	385.9	6.097559e+000	2.909238e+000	67	31	4.824222e+000	0	0	0	0	0	0	6.08636	1	0	46.5243	31.1613
DATA	2333	28	38	0	0	A_42_P599210	NM_001008326	4542.61	385.931	9.230276e+002	9.234668e+001	976	28	6.504515e+000	0	0	0	0	0	0	920.287	1	1	53.8203	28.9394
DATA	2334	28	39	0	0	A_44_P305801	NM_001033894	4568.09	386.104	3.850964e+003	3.851069e+002	3848	29	7.562499e+000	0	0	0	0	0	0	3834.55	1	1	46.8651	31.4839
DATA	2335	28	40	0	0	A_64_P085462	A_64_P085462	4593.5	386	5.896848e+004	5.896849e+003	58309	29	6.518594e+000	0	0	0	0	0	0	58629.5	1	1	54.1152	30.2778
DATA	2336	28	41	0	0	A_42_P488000	NM_001108479	4619	386	1.718863e+003	1.719101e+002	1744	31	7.479035e+000	0	0	0	0	0	0	1706.16	1	1	46.8651	32.6897
DATA	2337	28	42	0	0	A_42_P818546	NM_001191600	4644.23	385.884	7.983990e+002	7.989131e+001	859	31	7.169697e+000	0	0	0	0	0	0	791.063	1	1	46.5243	30.4074
DATA	2338	28	43	0	0	A_44_P488489	TC610872	4669.56	385.973	1.328084e+003	1.328395e+002	1320	28	5.814637e+000	0	0	0	0	0	0	1313.31	1	1	48.5334	28.68
DATA	2339	28	44	0	0	A_64_P153971	A_64_P153971	4695.5	386	6.942581e+000	2.960157e+000	68	31	8.150335e+000	0	0	0	0	0	0	6.85043	1	0	54.1152	31.1935
DATA	2340	28	45	0	0	A_64_P077985	NM_001170478	4720.49	386.4	3.006859e+001	4.166335e+000	87	28	6.193911e+000	0	0	0	0	0	0	29.6041	1	1	45.835	29.3103
DATA	2341	28	46	0	0	A_44_P576822	NM_080771	4745.46	386.081	1.128285e+003	1.128655e+002	1113	26	5.941414e+000	0	0	0	0	0	0	1108.16	1	1	48.5334	27.1304
DATA	2342	28	47	0	0	A_64_P134310	A_64_P134310	4771.27	386.219	6.757499e+001	7.352906e+000	129	29	5.343616e+000	0	0	0	0	0	0	66.1965	1	1	48.2044	29.4643
DATA	2343	28	48	0	0	A_64_P134706	NM_001107533	4796.98	385.964	8.963705e+000	3.041706e+000	70	26	7.357257e+000	0	0	0	0	0	0	8.75636	1	0	51.4001	28.1471
DATA	2344	28	49	0	0	A_42_P469751	XM_001054007	4821.83	386	8.111887e+002	8.117122e+001	829	32	6.299492e+000	0	0	0	0	0	0	790.206	1	1	46.8651	31.7941
DATA	2345	28	50	0	0	A_64_P082653	ENSRNOT00000020906	4847.56	385.972	7.133065e+001	7.708995e+000	132	33	7.297634e+000	0	0	0	0	0	0	69.2739	1	1	48.2044	32.7429
DATA	2346	28	51	0	0	A_43_P18902	NM_001109221	4872.79	386.162	1.142981e+002	1.180007e+001	173	31	8.118761e+000	0	0	0	0	0	0	110.66	1	1	46.1809	32.1667
DATA	2347	28	52	0	0	A_64_P086719	ENSRNOT00000065918	4898.32	385.938	1.546194e+001	3.323989e+000	76	27	8.548442e+000	0	0	0	0	0	0	14.9203	1	1	45.4864	29.6
DATA	2348	28	53	0	0	A_64_P138585	TC587165	4923.61	386.278	5.383616e+003	5.383697e+002	4947	38	7.783217e+000	0	0	0	0	0	0	5177.74	1	1	48.5334	38.5385
DATA	2349	28	54	0	0	A_64_P230444	ENSRNOT00000010282	4949.41	386.247	5.098621e+003	5.098707e+002	4871	32	6.164736e+000	0	0	0	0	0	0	4886.2	1	1	48.5334	33.3214
DATA	2350	28	55	0	0	A_64_P124427	TC642834	4974.64	386.13	1.034890e+002	1.076762e+001	164	29	1.123610e+001	0	0	0	0	0	0	98.8201	1	1	46.8651	32.8
DATA	2351	28	56	0	0	A_42_P778587	NM_001135767	4999.76	386.296	2.804984e+002	2.820816e+001	328	36	8.639205e+000	0	0	0	0	0	0	266.865	1	1	47.2035	36.125
DATA	2352	28	57	0	0	A_42_P526030	NM_057197	5025.09	385.672	7.341442e+003	7.341503e+002	6856	31	6.331888e+000	0	0	0	0	0	0	6957.43	1	1	45.1352	31.303
DATA	2353	28	58	0	0	A_64_P022561	XM_001070923	5050.73	386.214	8.898363e+001	9.392949e+000	144	29	5.564702e+000	0	0	0	0	0	0	84.0026	1	1	46.8651	29.1818
DATA	2354	28	59	0	0	A_64_P126226	NM_001105901	5076.11	386.5	1.519382e+002	1.549099e+001	203.5	31	7.449336e+000	0	0	0	0	0	0	142.866	1	1	56.9804	31.7241
DATA	2355	28	60	0	0	A_64_P089541	NM_001106214	5101.42	386.427	1.131948e+002	1.171854e+001	167	33	9.843215e+000	0	0	0	0	0	0	106.002	1	1	65	34
DATA	2356	28	61	0	0	A_44_P205869	NM_138891	5126.89	386.5	9.906281e+002	9.910959e+001	951	37	1.173691e+001	0	0	0	0	0	0	923.818	1	1	56.9804	39.2963
DATA	2357	28	62	0	0	A_44_P491796	NM_012881	5152.42	386.427	5.851533e+001	6.602300e+000	115	33	6.976354e+000	0	0	0	0	0	0	54.3365	1	1	57.5363	33.8519
DATA	2358	28	63	0	0	A_64_P132706	NM_001008304	5177.58	386.427	5.843652e+004	5.843653e+003	52215	33	8.763181e+000	0	0	0	0	0	0	54032.7	1	1	57.5363	35.72
DATA	2359	28	64	0	0	A_64_P040715	NM_001011979	5203.17	386.171	1.103033e+003	1.103464e+002	1056	36	9.804989e+000	0	0	0	0	0	0	1015.4	1	1	46.8651	35.7429
DATA	2360	28	65	0	0	A_44_P191055	NM_001107693	5228.38	386	2.507696e+003	2.507888e+002	2251.5	29.5	6.899410e+000	0	0	0	0	0	0	2298.33	1	1	48.5334	30.75
DATA	2361	28	66	0	0	A_64_P077493	XR_005942	5253.67	386.5	1.145553e+001	3.315703e+000	70	30	5.620896e+000	0	0	0	0	0	0	10.4536	1	0	57.5363	29.2647
DATA	2362	28	67	0	0	A_44_P317600	NM_012612	5279.06	385.825	3.939606e+002	3.951988e+001	416.5	29.5	6.579087e+000	0	0	0	0	0	0	357.857	1	1	45.4864	30.1071
DATA	2363	28	68	0	0	A_42_P751368	NM_001047874	5304.56	386.027	1.487238e+003	1.487569e+002	1364	30	5.533839e+000	0	0	0	0	0	0	1344.9	1	1	48.5334	31.3636
DATA	2364	28	69	0	0	A_42_P711568	NM_001107584	5329.81	386.519	1.107939e+004	1.107943e+003	9608	33	8.919871e+000	0	0	0	0	0	0	9974.97	1	1	49.8279	32.2222
DATA	2365	28	70	0	0	A_64_P091817	A_64_P091817	5355.5	386.5	1.369689e+003	1.370056e+002	1299	28	6.835392e+000	0	0	0	0	0	0	1227.52	1	1	57.5363	26.4516
DATA	2366	28	71	0	0	A_64_P006628	NM_172328	5380.94	386.386	8.006511e+001	8.615918e+000	133	29	8.542851e+000	0	0	0	0	0	0	71.428	1	1	47.2035	31.8621
DATA	2367	28	72	0	0	A_64_P057760	NM_001191643	5406.25	386.5	2.487570e+002	2.508030e+001	284	30.5	7.536986e+000	0	0	0	0	0	0	220.93	1	1	48.5334	30.6154
DATA	2368	28	73	0	0	A_44_P150013	NM_001134495	5431.5	386.5	3.223927e+000	3.211379e+000	58	30	8.016617e+000	0	0	0	0	0	0	-2.56216	0	0	57.5363	28.8846
DATA	2369	28	74	0	0	A_44_P526975	NM_001002822	5456.94	386.386	2.719287e+002	2.738355e+001	292	32	7.123179e+000	0	0	0	0	0	0	239.349	1	1	47.2035	30.9444
DATA	2370	28	75	66	-1	(-)3xSLv1	NegativeControl	5482.86	386.494	3.253127e+000	3.240466e+000	51	32	6.389508e+000	0	0	0	0	0	0	-8.62968	0	0	49.8279	31.6774
DATA	2371	28	76	0	0	A_42_P648937	NM_001191732	5507.8	386.239	1.409945e+003	1.410321e+002	1236	29	6.346706e+000	0	0	0	0	0	0	1230.05	1	1	46.8651	30.3143
DATA	2372	28	77	0	0	A_44_P533786	NM_053749	5533.33	386.5	2.946024e+001	4.400399e+000	85.5	31	7.623111e+000	0	0	0	0	0	0	25.5909	1	1	57.5363	31.3871
DATA	2373	28	78	0	0	A_64_P156165	S68987	5558.57	386.608	5.633056e+003	5.633152e+002	4716	36	8.709525e+000	0	0	0	0	0	0	4872.59	1	1	49.1849	35.1786
DATA	2374	28	79	0	0	A_64_P084293	NM_001000525	5584	386.545	2.077509e+001	3.896467e+000	75	31.5	8.281100e+000	0	0	0	0	0	0	17.8948	1	1	55.8519	31.5625
DATA	2375	28	80	0	0	A_42_P708569	NM_001191837	5609.5	386.735	8.675924e+003	8.675987e+002	7594	29	6.406367e+000	0	0	0	0	0	0	7442.59	1	1	46.5243	29.8077
DATA	2376	28	81	0	0	A_64_P112215	NM_001110141	5634.58	386.573	2.301350e+002	2.325220e+001	248	30	6.363961e+000	0	0	0	0	0	0	196.631	1	1	57.5363	29
DATA	2377	28	82	0	0	A_42_P567793	NM_001107668	5660.25	386.373	2.754550e+003	2.754752e+002	2291	28	6.933342e+000	0	0	0	0	0	0	2344.13	1	1	49.1849	29.0741
DATA	2378	28	83	0	0	A_42_P481087	XM_232226	5685.47	386.667	1.346881e+003	1.347297e+002	1175	29	9.304112e+000	0	0	0	0	0	0	1141.97	1	1	49.1849	30.069
DATA	2379	28	84	66	1	DarkCorner	DarkCorner	5711.23	386.702	3.374444e+000	3.361310e+000	51	26	6.030734e+000	0	0	0	0	0	0	-6.90907	0	0	51.4001	27.4286
DATA	2380	28	85	66	1	DarkCorner	DarkCorner	5736.61	386.74	3.386306e+000	3.380677e+000	60	26	6.808917e+000	0	0	0	0	0	0	1.90087	0	0	50.1463	26.9169
DATA	2381	29	1	66	1	DarkCorner	DarkCorner	3590.72	392.566	5.782350e+000	3.120007e+000	64	26	6.134523e+000	0	0	0	0	0	0	5.35506	1	0	49.1849	25.831
DATA	2382	29	2	66	1	DarkCorner	DarkCorner	3615.89	392.5	3.063620e+000	3.051696e+000	57	28	6.740026e+000	0	0	0	0	0	0	-0.699027	0	0	56.9804	28.1935
DATA	2383	29	3	0	0	A_64_P096512	NM_031782	3641.27	392.634	1.948228e+004	1.948231e+003	17865	32	9.566930e+000	0	0	0	0	0	0	18211.1	1	1	47.8731	31.6154
DATA	2384	29	4	0	0	A_44_P172814	NM_173102	3666.69	392.577	3.158234e+004	3.158236e+003	29558.5	32	7.540041e+000	0	0	0	0	0	0	29654.5	1	1	50.1463	31.931
DATA	2385	29	5	0	0	A_42_P788040	NM_001025053	3692.33	392.5	1.703108e+002	1.729514e+001	215	30	4.839724e+000	0	0	0	0	0	0	160.621	1	1	57.5363	30.1739
DATA	2386	29	6	0	0	A_42_P808945	NM_181368	3717.51	392.973	7.006162e+002	7.012573e+001	720.5	27	7.747715e+000	0	0	0	1	0	0	663.602	1	1	48.5334	27.2069
DATA	2387	29	7	0	0	A_64_P162713	A_64_P162713	3742.89	392.5	1.300782e+001	3.256708e+000	74	30	8.618266e+000	0	0	0	0	0	0	12.3706	1	0	65	31.7059
DATA	2388	29	8	0	0	A_44_P501204	NM_017361	3768.42	392.573	2.281116e+002	2.300417e+001	281.5	27	7.574504e+000	0	0	0	0	0	0	217.813	1	1	65	29.5429
DATA	2389	29	9	0	0	A_42_P785926	NM_001108289	3793.58	392.573	9.746588e+002	9.751088e+001	981	30	8.048652e+000	0	0	0	0	0	0	934.225	1	1	57.5363	30.5417
DATA	2390	29	10	0	0	A_42_P616287	NM_001134555	3819.11	392.5	1.498589e+002	1.527373e+001	203	27	8.534069e+000	0	0	0	0	0	0	144.179	1	1	56.9804	28.9459
DATA	2391	29	11	66	-1	(-)3xSLv1	NegativeControl	3844.5	392.5	2.952203e+000	2.940713e+000	51	30	8.618281e+000	0	0	0	0	0	0	-8.36286	0	0	57.5363	30.0541
DATA	2392	29	12	0	0	A_43_P12365	NM_023101	3869.89	392.5	3.817193e+001	4.812446e+000	100	30.5	7.640024e+000	0	0	0	0	0	0	36.9834	1	1	56.9804	31.2188
DATA	2393	29	13	0	0	A_64_P076643	ENSRNOT00000057620	3895.05	392.762	5.864691e+000	2.979328e+000	65.5	28	8.012490e+000	0	0	0	0	0	0	5.70078	1	0	45.4864	29.8333
DATA	2394	29	14	0	0	A_64_P074865	XR_008898	3920.58	392.573	4.787266e+000	2.951036e+000	66	28	6.035887e+000	0	0	0	0	0	0	4.66799	1	0	57.5363	28.4571
DATA	2395	29	15	0	0	A_64_P009582	XM_214287	3945.86	393	2.180606e+004	2.180608e+003	20961	32	6.933953e+000	0	0	0	0	0	0	21326.8	1	1	46.8651	32.0833
DATA	2396	29	16	0	0	A_44_P527270	NM_020073	3971.36	393.239	6.702101e+001	7.300608e+000	128	28	6.574470e+000	0	0	0	0	0	0	65.7349	1	1	46.1809	29.0968
DATA	2397	29	17	0	0	A_44_P530813	NM_012922	3997	393.066	5.444429e+002	5.452079e+001	608	32	8.824467e+000	0	0	0	0	0	0	535.409	1	1	44.0646	33.6061
DATA	2398	29	18	0	0	A_64_P078210	NM_001044303	4022.33	392.951	3.763085e+001	4.738831e+000	95	30	7.874128e+000	0	0	0	0	0	0	37.0973	1	1	44.0646	30.5758
DATA	2399	29	19	0	0	A_42_P764985	NM_133402	4047.57	392.9	6.264115e+003	6.264181e+002	6185	31	7.788934e+000	0	0	0	0	0	0	6189.44	1	1	47.5395	31.1034
DATA	2400	29	20	0	0	A_43_P23097	NM_001011965	4073.14	393.108	2.531032e+001	3.824677e+000	86.5	31	6.873405e+000	0	0	0	0	0	0	25.0631	1	1	47.5395	32.1429
DATA	2401	29	21	0	0	A_43_P19450	NM_001105713	4098.23	393.215	1.504203e+002	1.531185e+001	213	30	6.685404e+000	0	0	0	0	0	0	149.242	1	1	45.1352	31.1935
DATA	2402	29	22	0	0	A_42_P514419	NM_001009599	4123.69	393.313	1.436762e+003	1.437046e+002	1437.5	32	8.859167e+000	0	0	0	0	0	0	1428.08	1	1	45.835	31.8788
DATA	2403	29	23	0	0	A_64_P123974	A_64_P123974	4149.04	393.257	1.060631e+001	3.042894e+000	69.5	31	7.926345e+000	0	0	0	0	0	0	10.5592	1	0	46.5243	30.619
DATA	2404	29	24	0	0	A_64_P221399	NM_134415	4174.64	393.13	3.308562e+003	3.308685e+002	3352	28	3.949808e+000	0	0	0	0	0	0	3298.6	1	1	46.8651	28.3793
DATA	2405	29	25	0	0	A_44_P760124	A_44_P760124	4200.06	392.889	3.180705e+002	3.193399e+001	385	29	6.993347e+000	0	0	0	0	0	0	317.505	1	1	45.4864	30.3
DATA	2406	29	26	0	0	A_42_P589551	NM_001037093	4225.31	392.986	3.208560e+003	3.208686e+002	3242	29	6.559393e+000	0	0	0	0	0	0	3206.33	1	1	47.2035	29.2222
DATA	2407	29	27	0	0	A_42_P645467	NM_001108804	4250.92	393.301	1.225513e+001	3.091932e+000	73	26	7.908688e+000	0	0	0	0	0	0	12.2582	1	0	47.8731	27.8788
DATA	2408	29	28	0	0	A_64_P036006	A_64_P036006	4276.13	393.139	1.067446e+001	3.030895e+000	70	33	8.123162e+000	0	0	0	0	0	0	10.6846	1	0	46.8651	32.7037
DATA	2409	29	29	0	0	A_64_P088575	NM_001106355	4301.5	393.179	4.459311e+002	4.468315e+001	503	31	4.324166e+000	0	0	0	0	0	0	446.599	1	1	49.1849	31.5714
DATA	2410	29	30	0	0	A_42_P798776	XM_002725203	4327.12	393	6.003817e+003	6.003884e+002	6081	36	7.058246e+000	0	0	0	0	0	0	6014.9	1	1	49.8279	35.5833
DATA	2411	29	31	0	0	A_64_P017424	XM_001067041	4352.29	393.32	2.844629e+000	2.845324e+000	64	29.5	7.530098e+000	0	0	0	0	0	0	2.59023	0	0	47.8731	31.4643
DATA	2412	29	32	0	0	A_64_P147358	NM_001105764	4377.67	393.333	2.366946e+003	2.367116e+002	2405	31	5.686124e+000	0	0	0	0	0	0	2371.84	1	1	46.8651	30.5357
DATA	2413	29	33	0	0	A_42_P522285	NM_001044263	4403.5	393	3.729827e+002	3.740579e+001	430	31.5	6.847980e+000	0	0	0	0	0	0	373.674	1	1	54.1152	31.8824
DATA	2414	29	34	0	0	A_64_P130184	NM_017207	4428.75	393	2.930481e+003	2.930618e+002	2977.5	32.5	7.844069e+000	0	0	0	0	0	0	2934.88	1	1	49.1849	32.4706
DATA	2415	29	35	0	0	A_44_P167930	NM_012720	4453.78	393	4.140632e+003	4.140729e+002	4009	31	5.083634e+000	0	0	0	0	0	0	4144.68	1	1	46.1809	30.48
DATA	2416	29	36	0	0	A_64_P135305	NM_001013426	4479.09	393.104	1.018683e+004	1.018687e+003	10160	29	6.164875e+000	0	0	0	0	0	0	10189.7	1	1	46.8651	30.5455
DATA	2417	29	37	0	0	A_64_P100182	NM_001077678	4504.5	393	1.636680e+001	3.278813e+000	80	32	6.539216e+000	0	0	0	0	0	0	16.3569	1	1	54.1152	32.0571
DATA	2418	29	38	0	0	A_44_P521699	NM_001007728	4530.3	393.224	2.427784e+002	2.444386e+001	298	29.5	5.114029e+000	0	0	0	0	0	0	242.378	1	1	45.835	29.7059
DATA	2419	29	39	0	0	A_64_P053516	NM_001001280	4555.84	392.845	5.307745e+000	2.896742e+000	66	29	6.349486e+000	0	0	0	0	0	0	5.29227	1	0	46.8651	30.0857
DATA	2420	29	40	0	0	A_64_P073183	XM_001061392	4580.79	393.194	7.487666e+003	7.487720e+002	7148	30.5	7.160636e+000	0	0	0	0	0	0	7455.89	1	1	47.5395	31.0333
DATA	2421	29	41	0	0	A_64_P067447	NM_001109440	4606.09	393.104	1.487826e+003	1.488100e+002	1573	31	5.120332e+000	0	0	0	0	0	0	1479.2	1	1	46.8651	30.697
DATA	2422	29	42	0	0	A_64_P089251	NM_001014109	4631.58	392.875	9.630312e+001	1.004629e+001	154	31	7.176350e+000	0	0	0	0	0	0	95.5772	1	1	44.7812	31.75
DATA	2423	29	43	0	0	A_64_P118192	NM_022797	4657.37	392.735	6.739308e+002	6.745401e+001	735	28	6.100238e+000	0	0	0	0	0	0	667.562	1	1	46.5243	27.7097
DATA	2424	29	44	0	0	A_64_P082584	ENSRNOT00000024258	4682.37	393.25	1.028400e+002	1.067753e+001	164.5	29	7.804879e+000	0	0	0	0	0	0	101.669	1	1	41.0736	30.871
DATA	2425	29	45	0	0	A_42_P465677	NM_001106241	4707.74	393.222	2.736177e+002	2.751275e+001	326.5	31	8.229569e+000	0	0	0	0	0	0	269.908	1	1	47.5395	31.125
DATA	2426	29	46	0	0	A_42_P781999	NM_001106378	4733.42	393.427	2.466601e+004	2.466603e+003	23512.5	27	7.199822e+000	0	0	0	0	0	0	24274.3	1	1	57.5363	29.1379
DATA	2427	29	47	0	0	A_44_P991472	NM_134374	4758.57	393.392	1.573852e+003	1.574117e+002	1553	31	4.945898e+000	0	0	0	0	0	0	1545.02	1	1	49.1849	31.8095
DATA	2428	29	48	0	0	A_42_P767737	AY724480	4784.06	393.611	4.445795e+003	4.445889e+002	4281.5	28	5.220153e+000	0	0	0	0	0	0	4352.9	1	1	48.2044	28
DATA	2429	29	49	0	0	A_42_P648200	NM_001037356	4809.58	393.542	1.636759e+002	1.662393e+001	214	29	6.924469e+000	0	0	0	0	0	0	159.806	1	1	48.2044	29.3448
DATA	2430	29	50	0	0	A_64_P006062	NM_001191695	4834.41	393.382	1.997468e+002	2.018648e+001	259	33	5.827263e+000	0	0	0	0	0	0	194.464	1	1	46.8651	33.0968
DATA	2431	29	51	0	0	A_42_P728230	NM_001037782	4860	393.271	5.237249e+003	5.237330e+002	4897	30	8.094260e+000	0	0	0	0	0	0	5083.01	1	1	46.8651	31.2727
DATA	2432	29	52	0	0	A_64_P106011	A_64_P106011	4885.58	393.427	2.946367e+000	2.936044e+000	63	31	7.321891e+000	0	0	0	0	0	0	0.793173	0	0	57.5363	31.9143
DATA	2433	29	53	0	0	A_42_P622661	NM_001024292	4911.04	393.507	2.200640e+003	2.200837e+002	2100	37	1.041132e+001	0	0	0	0	0	0	2122	1	1	48.2044	37.1071
DATA	2434	29	54	0	0	A_42_P619844	NM_001030037	4936.32	393.521	9.512507e+003	9.512553e+002	8729	37	8.826398e+000	0	0	0	0	0	0	9141.35	1	1	48.5334	37.303
DATA	2436	29	56	0	0	A_64_P128260	XM_001056985	4987.06	393.611	1.419733e+003	1.420045e+002	1357.5	37	1.065254e+001	0	0	0	0	0	0	1354.59	1	1	48.2044	37.32
DATA	2437	29	57	0	0	A_44_P1034950	NM_053294	5012.54	393.149	3.530444e+002	3.543060e+001	397.5	34	7.215960e+000	0	0	0	0	0	0	335.558	1	1	46.8651	34.5152
DATA	2438	29	58	0	0	A_64_P080316	NM_139113	5038	393.455	2.049093e+002	2.070920e+001	252	30	6.687753e+000	0	0	0	0	0	0	194.018	1	1	55.8519	30.4359
DATA	2439	29	59	0	0	A_64_P053069	NM_001106820	5063.3	393.493	8.322812e+002	8.328255e+001	819	28	6.747345e+000	0	0	0	0	0	0	784.96	1	1	46.8651	29.12
DATA	2440	29	60	0	0	A_42_P498066	NM_031136	5088.67	393.5	7.367311e+004	7.367311e+003	69955.5	34	8.979341e+000	0	0	0	0	0	0	69205.5	1	1	57.5363	34.3333
DATA	2441	29	61	0	0	A_44_P277068	ENSRNOT00000058491	5114.2	393.761	6.099704e+003	6.099779e+002	5728	33	9.859811e+000	0	0	0	0	0	0	5706.43	1	1	46.8651	34.6111
DATA	2442	29	62	0	0	A_44_P685613	XM_225679	5139.37	393.64	2.153768e+003	2.153983e+002	1972.5	34.5	6.244574e+000	0	0	0	0	0	0	2006.54	1	1	48.8603	34.4286
DATA	2443	29	63	0	0	A_64_P124364	ENSRNOT00000015807	5165	393.545	4.279410e+002	4.290343e+001	454	31	7.649832e+000	0	0	0	0	0	0	396.98	1	1	65	32.2083
DATA	2444	29	64	0	0	A_42_P466362	NM_017142	5190.01	393.588	1.353006e+003	1.353355e+002	1281.5	34.5	8.307039e+000	0	0	0	0	0	0	1249.82	1	1	45.835	35.6
DATA	2445	29	65	0	0	A_64_P081517	ENSRNOT00000037639	5215.58	393.573	1.164998e+002	1.205212e+001	170	31	9.581758e+000	0	0	0	0	0	0	107.144	1	1	57.5363	32.8857
DATA	2446	29	66	0	0	A_42_P629394	NM_031683	5240.99	393.391	3.269556e+003	3.269703e+002	2968	31	6.189442e+000	0	0	0	0	0	0	2993.71	1	1	46.8651	30.6333
DATA	2447	29	67	0	0	A_44_P500975	NM_001000833	5266.61	393.492	3.804805e+001	4.917213e+000	96	29	6.543842e+000	0	0	0	0	0	0	34.6831	1	1	42.2201	28.3846
DATA	2448	29	68	0	0	A_64_P165046	ENSRNOT00000015927	5292.07	393.5	7.097761e+001	7.756791e+000	122.5	30	7.050951e+000	0	0	0	0	0	0	64.4117	1	1	48.5334	30.8182
DATA	2449	29	69	0	0	A_44_P222865	XM_235305	5317.26	393.778	1.232384e+004	1.232388e+003	10897	33	5.702148e+000	0	0	0	0	0	0	11134.7	1	1	47.5395	32.4167
DATA	2451	29	71	0	0	A_64_P131688	XM_574187	5368.42	393.573	1.847673e+001	3.670315e+000	77	28	5.534621e+000	0	0	0	0	0	0	16.5428	1	1	57.5363	28.8182
DATA	2452	29	72	0	0	A_42_P556457	NM_001033931	5393.5	394.206	2.602778e+003	2.602973e+002	2289	30	7.309786e+000	0	0	0	1	0	0	2320.32	1	1	46.5243	30.2917
DATA	2453	29	73	0	0	A_42_P734384	NM_001108406	5418.74	393.667	2.253322e+003	2.253549e+002	1959	31	8.331282e+000	0	0	0	0	0	0	1999.66	1	1	48.2044	30.2222
DATA	2454	29	74	0	0	A_42_P728032	XM_001066058	5444.25	393.644	1.497782e+003	1.498127e+002	1312.5	30	6.292597e+000	0	0	0	0	0	0	1323.23	1	1	48.5334	29.625
DATA	2455	29	75	0	0	A_64_P151525	A_64_P151525	5469.97	393.843	3.594239e+001	4.831175e+000	91	34	5.445234e+000	0	0	0	0	0	0	31.6128	1	1	46.8651	33.9333
DATA	2456	29	76	0	0	A_43_P19276	ENSRNOT00000039523	5495.18	393.838	6.541777e+002	6.549807e+001	634.5	30	7.431135e+000	0	0	0	0	0	0	572.879	1	1	46.1809	31.9375
DATA	2457	29	77	0	0	A_44_P529811	NM_001107657	5520.51	393.771	1.365943e+001	3.531313e+000	71	30	7.327305e+000	0	0	0	0	0	0	11.9101	1	0	47.2035	32.2424
DATA	2458	29	78	0	0	A_64_P104640	A_64_P104640	5545.61	393.931	4.011708e+004	4.011709e+003	34538.5	36	7.812039e+000	0	0	0	0	0	0	34833.3	1	1	53.8203	33.1935
DATA	2459	29	79	0	0	A_64_P003234	NM_001109048	5571.45	394.091	3.017227e+001	4.459623e+000	86	35	7.945197e+000	0	0	0	0	0	0	26.0875	1	1	49.5074	34.6154
DATA	2460	29	80	0	0	A_64_P097158	NM_001000875	5596.59	394.043	3.310320e+000	3.305747e+000	62	29	7.726872e+000	0	0	0	0	0	0	2.01719	0	0	47.8731	31.7273
DATA	2461	29	81	0	0	A_64_P141814	NM_001134629	5622.09	393.935	2.514676e+002	2.536378e+001	273.5	30	6.039283e+000	0	0	0	0	0	0	215.657	1	1	54.4085	30.3704
DATA	2462	29	82	0	0	A_42_P463602	NM_001107592	5647.75	394.13	3.336876e+000	3.326466e+000	59	28	6.654751e+000	0	0	0	0	0	0	1.11849	0	0	48.8603	29
DATA	2463	29	83	0	0	A_64_P083366	NM_001077643	5672.78	393.866	1.885204e+004	1.885207e+003	16192	29	7.164728e+000	0	0	0	0	0	0	16042.7	1	1	46.1809	28
DATA	2464	29	84	0	0	A_44_P121039	NM_172008	5698.37	393.873	1.719362e+002	1.751675e+001	204	28	7.017796e+000	0	0	0	0	0	0	145.772	1	1	47.5395	28.129
DATA	2465	29	85	66	1	DarkCorner	DarkCorner	5724.13	393.981	3.374164e+000	3.361031e+000	58	28	5.739649e+000	0	0	0	0	0	0	-1.31703	0	0	40.2912	28.2766
DATA	2466	30	1	66	1	DarkCorner	DarkCorner	3603.45	399.893	3.066443e+000	3.054508e+000	59.5	26	6.019067e+000	0	0	0	0	0	0	-0.886554	0	0	48.8603	26.6667
DATA	2467	30	2	0	0	A_42_P687443	NM_020100	3628.5	400	1.313811e+002	1.348536e+001	181	29	9.707901e+000	0	0	0	0	0	0	122.689	1	1	54.1152	31.08
DATA	2468	30	3	0	0	A_42_P563382	ENSRNOT00000055321	3654.04	400.141	4.087178e+003	4.087290e+002	3818	29	6.875924e+000	0	0	0	0	0	0	3834.25	1	1	46.8651	29.7241
DATA	2469	30	4	0	0	A_42_P667100	NM_001013932	3679.39	400	1.807240e+003	1.807491e+002	1754	31.5	8.582594e+000	0	0	0	0	0	0	1702.83	1	1	49.8279	31.1667
DATA	2470	30	5	0	0	A_42_P553319	TC597248	3704.71	400.246	1.415763e+002	1.447210e+001	194	28.5	8.158431e+000	0	0	0	0	0	0	133.973	1	1	45.1352	28
DATA	2471	30	6	0	0	A_64_P151358	NM_181695	3730.5	400	2.587109e+001	3.952387e+000	84	27.5	8.344341e+000	0	0	0	0	0	0	24.5843	1	1	54.1152	28.7188
DATA	2472	30	7	0	0	A_44_P196743	ENSRNOT00000007795	3755.86	400.188	2.987556e+000	2.975928e+000	59.5	26	7.889574e+000	0	0	0	0	0	0	-0.223212	0	0	46.1809	29.3947
DATA	2474	30	9	0	0	A_64_P127111	NM_001106004	3806.09	400.104	1.316331e+004	1.316334e+003	12411	31	8.015107e+000	0	0	0	0	0	0	12654.7	1	1	46.8651	31.125
DATA	2475	30	10	0	0	A_42_P470775	NM_001025126	3831.49	400.13	1.773054e+003	1.773299e+002	1729	27.5	8.426097e+000	0	0	0	0	0	0	1710.75	1	1	47.2035	28.9706
DATA	2476	30	11	0	0	A_44_P472855	NM_001000961	3857.5	400	1.391439e+002	1.422003e+001	197	28.5	8.213653e+000	0	0	0	0	0	0	134.731	1	1	54.1152	29.65
DATA	2477	30	12	0	0	A_64_P080682	NM_001109652	3882.43	400.032	6.312003e+000	2.990207e+000	66	30	8.049526e+000	0	0	0	0	0	0	6.13182	1	0	44.0646	31.1111
DATA	2478	30	13	0	0	A_42_P727368	NM_001025693	3907.79	400.4	6.690405e+001	7.297231e+000	124	27	6.890703e+000	0	0	0	0	0	0	65.204	1	1	46.5243	28.3077
DATA	2479	30	14	0	0	A_64_P034427	A_64_P034427	3933.28	400.118	4.095343e+003	4.095446e+002	4178	31	6.855655e+000	0	0	0	0	0	0	4003.25	1	1	48.8603	30
DATA	2480	30	15	0	0	A_64_P042871	A_64_P042871	3958.35	400.232	6.171755e+002	6.178548e+001	683	27	7.409044e+000	0	0	0	0	0	0	605.015	1	1	46.8651	30.3182
DATA	2481	30	16	0	0	A_64_P152617	NM_001105747	3984.13	400.028	4.007479e+000	2.916269e+000	64	29.5	7.238381e+000	0	0	0	0	0	0	3.93921	1	0	46.8651	29.1563
DATA	2482	30	17	0	0	A_44_P468879	NM_001007798	4009.58	399.933	1.950770e+001	3.479563e+000	78	34	8.075946e+000	0	0	0	0	0	0	19.224	1	1	43.7019	33.4643
DATA	2483	30	18	0	0	A_44_P252976	NM_001012071	4034.91	400.386	1.351738e+002	1.381960e+001	198	33	9.070351e+000	0	0	0	0	0	0	133.531	1	1	57.259	32.0667
DATA	2484	30	19	0	0	A_64_P014080	NM_022189	4060.42	400.427	7.210069e+000	2.957201e+000	68	31	5.734168e+000	0	0	0	0	0	0	7.13826	1	0	57.5363	31.5455
DATA	2485	30	20	0	0	A_44_P204789	NM_001025684	4085.68	399.818	5.307950e+002	5.315663e+001	595	29	6.347712e+000	0	0	0	0	0	0	526.536	1	1	45.4864	29.7037
DATA	2486	30	21	0	0	A_64_P030373	NM_001127319	4111.42	400.427	3.452848e+001	4.481438e+000	93.5	33	6.003488e+000	0	0	0	0	0	0	34.3185	1	1	57.5363	32.4483
DATA	2487	30	22	0	0	A_42_P558703	NM_001106810	4136.63	400.64	6.535097e+002	6.541317e+001	712	30	8.439538e+000	0	0	0	0	0	0	650.639	1	1	48.8603	30.25
DATA	2488	30	23	0	0	A_44_P241190	NM_001013199	4161.8	400.6	1.042052e+003	1.042441e+002	1112	28	4.869898e+000	0	0	0	0	0	0	1039.03	1	1	49.1849	28.1818
DATA	2489	30	24	0	0	A_42_P539095	XM_001081794	4187.25	400.373	6.807373e+002	6.813311e+001	746	31	5.453247e+000	0	0	0	0	0	0	679.656	1	1	49.1849	31.5625
DATA	2490	30	25	0	0	A_64_P010905	ENSRNOT00000057216	4212.54	400.176	1.937511e+002	1.958225e+001	258.5	25.5	9.395989e+000	0	0	0	0	0	0	193.663	1	1	48.8603	30.2692
DATA	2491	30	26	0	0	A_44_P500660	NM_001007645	4237.94	400.4	3.981906e+002	3.992005e+001	451.5	26.5	7.689148e+000	0	0	0	0	0	0	398.412	1	1	47.5395	28.2941
DATA	2492	30	27	0	0	A_64_P056436	A_64_P056436	4263.5	400.265	2.805291e+002	2.819585e+001	349	33	9.082866e+000	0	0	0	0	0	0	280.908	1	1	46.5243	33.4615
DATA	2493	30	28	0	0	A_42_P773816	NM_017079	4288.95	400.123	1.139212e+002	1.173929e+001	173	32	7.895733e+000	0	0	0	0	0	0	114.145	1	1	45.835	33.25
DATA	2494	30	29	0	0	A_64_P138604	NM_001009967	4314.42	400.427	6.029568e+004	6.029568e+003	59228	35	6.011622e+000	0	0	0	0	0	0	60443.2	1	1	57.5363	34.7037
DATA	2495	30	30	0	0	A_42_P705302	NM_001107361	4339.63	400.64	7.299783e+003	7.299838e+002	7155	31.5	6.460583e+000	0	0	0	0	0	0	7319.75	1	1	48.8603	32
DATA	2496	30	31	0	0	A_64_P027259	NM_001191656	4364.93	400.718	2.550737e+004	2.550739e+003	25414	31	7.527516e+000	0	0	0	0	0	0	25579.7	1	1	47.2035	32.2778
DATA	2497	30	32	0	0	A_44_P288333	ENSRNOT00000006659	4390.66	400.522	3.833967e+002	3.844410e+001	444	32	5.466817e+000	0	0	0	0	0	0	384.441	1	1	46.5243	31.2813
DATA	2498	30	33	0	0	A_42_P618217	NM_130752	4415.67	400.5	8.074615e+001	8.556987e+000	142.5	31	8.163806e+000	0	0	0	0	0	0	80.9449	1	1	57.5363	32.0909
DATA	2499	30	34	0	0	A_64_P151587	A_64_P151587	4441.33	400.5	5.852771e+000	2.893498e+000	67	31	7.602823e+000	0	0	0	0	0	0	5.86456	1	0	57.5363	31.3929
DATA	2500	30	35	0	0	A_42_P771107	NM_001108217	4466.48	400.362	1.216787e+003	1.217117e+002	1248	29	7.192125e+000	0	0	0	0	0	0	1218.48	1	1	47.5395	29.32
DATA	2501	30	36	0	0	A_42_P689013	NM_053800	4491.81	400.412	1.773262e+004	1.773264e+003	17141.5	31	6.334579e+000	0	0	0	0	0	0	17743.4	1	1	46.5243	31.4242
DATA	2502	30	37	0	0	A_64_P155334	NM_001100945	4517.53	400.784	2.125667e+003	2.125857e+002	2055.5	31	6.113492e+000	0	0	0	0	0	0	2124.96	1	1	48.8603	30.9143
DATA	2503	30	38	0	0	A_64_P049007	A_64_P049007	4542.82	401.076	3.582315e+001	4.573650e+000	94	30	4.935721e+000	0	0	0	0	0	0	35.7719	1	1	45.835	30.1429
DATA	2504	30	39	0	0	A_44_P351461	ENSRNOT00000027179	4568.33	400.5	3.675072e+001	4.649042e+000	99.5	28	7.121073e+000	0	0	0	0	0	0	36.648	1	1	57.5363	29.25
DATA	2505	30	40	0	0	A_44_P604267	NM_022933	4593.15	400.621	2.707342e+002	2.722317e+001	332.5	31	6.791369e+000	0	0	0	0	0	0	269.593	1	1	45.4864	32.3714
DATA	2506	30	41	0	0	A_64_P070475	XM_001061514	4619	400.545	2.867335e+000	2.856175e+000	52.5	31	5.260451e+000	0	0	0	0	0	0	-6.50065	0	0	55.8519	30.7879
DATA	2507	30	42	0	0	A_64_P119963	A_64_P119963	4644.13	400.453	6.047870e+002	6.054634e+001	662.5	30	7.093028e+000	0	0	0	0	0	0	600.161	1	1	44.4243	30.1471
DATA	2508	30	43	0	0	A_42_P658562	NM_001134416	4669.57	400.478	3.052442e+002	3.065876e+001	358.5	29	8.421171e+000	0	0	0	0	0	0	302.318	1	1	46.5243	30.129
DATA	2509	30	44	0	0	A_64_P116830	A_64_P116830	4695.42	400.573	5.727098e+001	6.407330e+000	119	33	8.248451e+000	0	0	0	0	0	0	56.6007	1	1	57.5363	32.5862
DATA	2510	30	45	0	0	A_64_P048531	ENSRNOT00000019473	4720.58	400.573	1.139185e+002	1.175014e+001	171	30.5	8.365501e+000	0	0	0	0	0	0	112.333	1	1	57.5363	32.1333
DATA	2511	30	46	0	0	A_64_P122716	NM_139331	4746	400.545	4.961401e+000	2.928780e+000	67.5	29.5	6.740465e+000	0	0	0	0	0	0	4.88052	1	0	55.8519	30.2143
DATA	2512	30	47	0	0	A_64_P077323	NM_201992	4771.42	400.573	7.678894e+000	2.993997e+000	68	29	6.548400e+000	0	0	0	0	0	0	7.5344	1	0	57.5363	30.1923
DATA	2513	30	48	0	0	A_42_P569711	NM_001108977	4796.63	400.712	3.324007e+002	3.336647e+001	381.5	27	5.726897e+000	0	0	0	0	0	0	325.277	1	1	48.5334	27.7879
DATA	2514	30	49	0	0	A_42_P474100	NM_001191820	4821.93	400.718	5.844932e+003	5.845004e+002	5562	30	7.474744e+000	0	0	0	0	0	0	5703.51	1	1	47.2035	29.8889
DATA	2515	30	50	0	0	A_64_P026404	A_64_P026404	4847.5	400.648	2.929953e+000	2.918550e+000	58	34	8.279333e+000	0	0	0	0	0	0	-2.96388	0	0	57.5363	34.1212
DATA	2516	30	51	0	0	A_64_P026581	ENSRNOT00000029099	4873.04	400.855	3.166182e+003	3.166317e+002	3055.5	30	7.013658e+000	0	0	0	0	0	0	3070.78	1	1	46.8651	31.5161
DATA	2517	30	52	0	0	A_64_P043624	NM_133565	4898.36	400.742	3.103978e+003	3.104117e+002	3060	33	1.109863e+001	0	0	0	0	0	0	3000.73	1	1	46.1809	34.5556
DATA	2518	30	53	0	0	A_44_P417429	NM_001011983	4923.5	401	2.877090e+003	2.877241e+002	2693	40	8.731023e+000	0	0	0	0	0	0	2772.27	1	1	48.5334	39.6667
DATA	2519	30	54	0	0	A_64_P007574	ENSRNOT00000028681	4949.1	400.986	1.691841e+004	1.691843e+003	15762	32	8.179965e+000	0	0	0	0	0	0	16245.1	1	1	46.8651	33.6129
DATA	2520	30	55	0	0	A_42_P529690	NM_001173510	4974.44	400.973	2.891681e+004	2.891683e+003	27041	34	8.971905e+000	0	0	0	0	0	0	27667.1	1	1	48.5334	35.069
DATA	2521	30	56	0	0	A_42_P505070	TC624062	4999.88	400.905	2.723543e+003	2.723706e+002	2595	35.5	9.172653e+000	0	0	0	1	0	0	2596.23	1	1	47.5395	35.2857
DATA	2522	30	57	0	0	A_42_P504653	NM_017143	5025.5	401	3.110065e+001	4.314217e+000	88	32	7.022174e+000	0	0	0	0	0	0	29.5343	1	1	54.1152	32.4286
DATA	2523	30	58	0	0	A_64_P017891	A_64_P017891	5051.02	400.645	5.555409e+000	3.052763e+000	66	28	5.893555e+000	0	0	0	0	0	0	5.25487	1	0	44.0646	28.6552
DATA	2524	30	59	0	0	A_42_P642724	NM_001107585	5075.86	400.803	4.443600e+003	4.443702e+002	4037.5	31	9.330120e+000	0	0	0	0	0	0	4187.04	1	1	46.8651	32.6364
DATA	2525	30	60	0	0	A_42_P780943	NM_001011906	5101.04	400.806	9.840597e+002	9.845246e+001	982	32	9.191163e+000	0	0	0	0	0	0	923.534	1	1	46.1809	32.4595
DATA	2526	30	61	0	0	A_44_P482325	NM_145669	5126.8	401	6.027116e+002	6.034768e+001	598	34	8.461925e+000	0	0	0	0	0	0	563.301	1	1	49.1849	34.3333
DATA	2527	30	62	0	0	A_42_P716750	NM_001024757	5152.22	401	1.869258e+002	1.893990e+001	228	32.5	7.054186e+000	0	0	0	1	0	0	173.973	1	1	46.1809	33.1923
DATA	2528	30	63	0	0	A_64_P009565	NM_001191823	5177.63	401	2.277820e+002	2.298333e+001	273	31	8.273794e+000	0	0	0	0	0	0	211.099	1	1	48.5334	32.2069
DATA	2529	30	64	0	0	A_42_P495969	NM_012824	5202.92	401.015	1.078317e+004	1.078322e+003	9837	33	9.048371e+000	0	0	0	0	0	0	9950.73	1	1	46.8651	33.8889
DATA	2530	30	65	0	0	A_64_P154671	ENSRNOT00000024704	5228.5	401	1.930102e+002	1.954687e+001	240.5	28	7.255073e+000	0	0	0	0	0	0	177.332	1	1	48.5334	29.4063
DATA	2531	30	66	0	0	A_44_P111337	NM_001108724	5253.94	400.899	2.702995e+003	2.703173e+002	2462	29	5.789408e+000	0	0	0	0	0	0	2472.49	1	1	46.8651	29
DATA	2532	30	67	0	0	A_42_P665627	NM_023095	5279.57	400.968	6.201923e+001	6.941569e+000	121	30	6.056708e+000	0	0	0	0	0	0	56.4787	1	1	44.0646	29.6061
DATA	2533	30	68	0	0	A_44_P447585	NM_001166676	5304.5	401	1.012290e+001	3.291094e+000	68.5	34	7.065864e+000	0	0	0	0	0	0	9.17851	1	0	65	33.0667
DATA	2534	30	69	0	0	A_42_P463754	NM_030994	5329.72	400.987	4.911929e+002	4.921990e+001	484	31	9.478911e+000	0	0	0	0	0	0	443.4	1	1	49.1849	33.2759
DATA	2535	30	70	0	0	A_42_P644717	NM_001108927	5355.5	401	3.485526e+000	3.178893e+000	62.5	28	6.125735e+000	0	0	0	0	0	0	3.13217	1	0	65	28.1034
DATA	2536	30	71	0	0	A_42_P546539	NM_001135801	5380.71	400.833	7.305399e+002	7.312290e+001	699	30.5	8.788892e+000	0	0	0	1	0	0	653.555	1	1	45.835	30.2692
DATA	2537	30	72	0	0	A_42_P818297	XM_001073988	5406.4	401.103	1.473860e+003	1.474204e+002	1311	30	7.916098e+000	0	0	0	0	0	0	1312.68	1	1	50.1463	29.2308
DATA	2538	30	73	0	0	A_64_P047416	NM_001109501	5431.57	400.855	2.232243e+002	2.255094e+001	262	30	7.143223e+000	0	0	0	0	0	0	197.931	1	1	47.2035	28.8889
DATA	2539	30	74	0	0	A_43_P18389	XM_002726292	5457	401.455	1.193560e+001	3.430349e+000	71	34	7.760745e+000	0	0	0	0	0	0	10.5379	1	0	65	31.6667
DATA	2540	30	75	0	0	A_64_P044276	NM_001105946	5482.56	400.973	3.089425e+003	3.089594e+002	2734	34.5	1.014237e+001	0	0	0	0	0	0	2715.4	1	1	48.5334	35.1429
DATA	2541	30	76	0	0	A_64_P059475	ENSRNOT00000029976	5507.58	401.427	3.256659e+000	3.244434e+000	61	30	7.340278e+000	0	0	0	0	0	0	0.473344	0	0	65	32.3824
DATA	2542	30	77	0	0	A_64_P005496	A_64_P005496	5533.42	401.427	3.270823e+000	3.264095e+000	61	35	6.476063e+000	0	0	0	0	0	0	1.72436	0	0	65	32.7576
DATA	2544	30	79	0	0	A_42_P739860	NM_133578	5583.8	401.4	1.684734e+003	1.685054e+002	1446	29	6.747549e+000	0	0	0	1	0	0	1456.15	1	1	49.1849	30.4706
DATA	2545	30	80	0	0	A_42_P681251	NM_030844	5609.63	401.36	4.377301e+003	4.377425e+002	3759	33	9.627658e+000	0	0	0	1	0	0	3767.86	1	1	48.8603	33.6071
DATA	2546	30	81	0	0	A_42_P567793	NM_001107668	5634.63	401	2.768464e+003	2.768662e+002	2309.5	30	9.336617e+000	0	0	0	0	0	0	2373.59	1	1	48.5334	32.6207
DATA	2547	30	82	0	0	A_64_P041662	NM_182843	5660.46	401.118	3.674962e+002	3.689970e+001	364	26.5	6.770070e+000	0	0	0	0	0	0	313.862	1	1	49.8279	26.9231
DATA	2548	30	83	0	0	A_42_P534679	NM_001134974	5685.63	401.36	3.008554e+003	3.008739e+002	2533	28	7.509728e+000	0	0	0	0	0	0	2560.19	1	1	48.8603	27.6296
DATA	2549	30	84	66	1	DarkCorner	DarkCorner	5710.89	401.5	3.361530e+000	3.348447e+000	55	26	6.085993e+000	0	0	0	0	0	0	-4.40506	0	0	56.9804	26.1563
DATA	2550	30	85	66	1	DarkCorner	DarkCorner	5736.57	401.505	3.373234e+000	3.362537e+000	62	27	6.883971e+000	0	0	0	0	0	0	1.08052	0	0	52.9257	26.8587
DATA	2551	31	1	66	1	DarkCorner	DarkCorner	3590.41	406.932	3.069810e+000	3.061869e+000	61	26	7.219519e+000	0	0	0	0	0	0	1.45419	0	0	48.8603	26.8037
DATA	2552	31	2	0	0	A_42_P576549	NM_001106490	3616.12	407.072	1.088639e+001	3.232305e+000	70.5	30	7.098185e+000	0	0	0	0	0	0	10.1565	1	0	46.8651	29.7931
DATA	2553	31	3	0	0	A_42_P542638	NM_001012202	3641.5	407	8.149859e+002	8.155489e+001	819.5	29	6.983544e+000	0	0	0	0	0	0	763.783	1	1	54.1152	29.3548
DATA	2554	31	4	0	0	A_42_P765736	NM_001025670	3666.65	407.097	2.656374e+001	4.019365e+000	81.5	33	8.415154e+000	0	0	0	0	0	0	25.0045	1	1	48.2044	32.2593
DATA	2555	31	5	0	0	A_44_P372461	NM_001170708	3692.43	407.232	5.842436e+002	5.850150e+001	616.5	29	8.645678e+000	0	0	0	0	0	0	552.373	1	1	46.8651	28.5946
DATA	2556	31	6	0	0	A_64_P070554	XM_001059856	3717.89	407.078	3.779399e+001	4.819569e+000	96.5	28.5	1.041462e+001	0	0	0	0	0	0	35.8817	1	1	45.835	29.8667
DATA	2557	31	7	0	0	A_64_P030859	ENSRNOT00000045252	3742.62	407.5	1.920946e+004	1.920948e+003	18126	29	8.722447e+000	0	0	0	0	0	0	18311	1	1	48.5334	31.5946
DATA	2558	31	8	0	0	A_64_P079260	NM_001005546	3767.88	407.971	4.225894e+002	4.236296e+001	446	27	1.011389e+001	0	0	0	0	0	0	404.434	1	1	46.8651	31.3429
DATA	2559	31	9	0	0	A_64_P149846	A_64_P149846	3793.57	407.239	1.500206e+004	1.500209e+003	14969.5	32	7.420389e+000	0	0	0	0	0	0	14411.3	1	1	46.5243	32.8929
DATA	2560	31	10	0	0	A_64_P120624	NM_031634	3819.19	407.43	1.318345e+001	3.226445e+000	73	28	8.268931e+000	0	0	0	0	0	0	12.7115	1	0	65	28.5588
DATA	2561	31	11	0	0	A_64_P158020	NM_001008909	3844.97	407.31	8.532062e+001	9.022558e+000	143	26.5	8.447973e+000	0	0	0	0	0	0	82.5594	1	1	47.2035	28.9444
DATA	2562	31	12	0	0	A_64_P116606	NM_153724	3870.25	407.549	4.481030e+001	5.350877e+000	106	27.5	7.063817e+000	0	0	0	0	0	0	43.5074	1	1	47.5395	28.2647
DATA	2563	31	13	0	0	A_44_P532436	ENSRNOT00000006946	3895.19	407.791	1.260862e+001	3.176077e+000	74	28	9.080007e+000	0	0	0	0	0	0	12.2813	1	0	46.1809	30.0882
DATA	2564	31	14	0	0	A_64_P027545	NM_023095	3920.58	407.427	1.784283e+002	1.807797e+001	236	29	6.941792e+000	0	0	0	0	0	0	174.322	1	1	57.5363	27.9737
DATA	2565	31	15	0	0	A_64_P076705	NM_017088	3946.11	407.5	1.137315e+005	1.137315e+004	112515	30	8.826426e+000	0	0	0	0	0	0	111442	1	1	56.9804	31.5833
DATA	2566	31	16	0	0	A_44_P238642	NM_001127201	3971.25	407.627	4.909451e+003	4.909536e+002	4729	29.5	7.156231e+000	0	0	0	0	0	0	4823.87	1	1	49.1849	29.7857
DATA	2567	31	17	0	0	A_64_P037249	NM_001105802	3996.86	407.565	9.946078e+001	1.035527e+001	158	30	8.325861e+000	0	0	0	0	0	0	97.9828	1	1	47.2035	30.2059
DATA	2568	31	18	0	0	A_64_P061524	NM_172064	4022.42	407.427	2.718606e+002	2.733768e+001	336	31	8.184651e+000	0	0	0	0	0	0	268.474	1	1	57.5363	30.6667
DATA	2569	31	19	0	0	A_42_P536564	NM_001008344	4047.44	407.521	4.252574e+003	4.252671e+002	4229	33	8.012455e+000	0	0	0	0	0	0	4209.05	1	1	48.2044	32.2593
DATA	2570	31	20	0	0	A_64_P062433	NM_001135804	4073.11	407.5	5.394486e+002	5.402077e+001	594	32	6.972641e+000	0	0	0	0	0	0	535.063	1	1	56.9804	32.6071
DATA	2571	31	21	0	0	A_42_P665509	NM_053777	4098.5	407.5	5.022638e+004	5.022639e+003	49635	33	6.815213e+000	0	0	0	0	0	0	49914.4	1	1	57.5363	32.3667
DATA	2572	31	22	0	0	A_44_P250144	NM_001001373	4123.52	407.987	4.223560e+000	2.883135e+000	65	33	9.108576e+000	0	0	0	0	0	0	4.20485	1	0	50.4627	33.6154
DATA	2573	31	23	0	0	A_42_P746838	NM_001024286	4149.1	407.667	1.724609e+001	3.329102e+000	77	29	8.214973e+000	0	0	0	0	0	0	17.1966	1	1	46.5243	30.0263
DATA	2574	31	24	0	0	A_44_P210852	NM_001034187	4174.11	408.091	1.030076e+002	1.068602e+001	166	30	4.945334e+000	0	0	0	0	0	0	102.86	1	1	46.1809	30.2941
DATA	2575	31	25	0	0	A_64_P019390	A_64_P019390	4200	407.545	2.829697e+001	4.009117e+000	87	32	8.240401e+000	0	0	0	0	0	0	28.2905	1	1	55.8519	32.9143
DATA	2576	31	26	0	0	A_64_P134709	NM_001105760	4225.35	407.609	1.183906e+002	1.217424e+001	179.5	24.5	5.009465e+000	0	0	0	0	0	0	118.49	1	1	47.2035	25.4
DATA	2578	31	28	0	0	A_64_P028117	NM_001000372	4276.33	407.5	3.610914e+001	4.589313e+000	96	31	8.345943e+000	0	0	0	0	0	0	36.197	1	1	57.5363	32.3929
DATA	2579	31	29	0	0	A_44_P391517	NM_001034144	4301.58	407.573	5.575242e+002	5.582425e+001	626	33	7.619998e+000	0	0	0	0	0	0	559.179	1	1	57.5363	34.0667
DATA	2580	31	30	0	0	A_42_P743682	NM_133599	4327	407.545	5.172175e+001	5.895786e+000	113	31	7.389581e+000	0	0	0	0	0	0	51.8935	1	1	55.8519	32.0345
DATA	2581	31	31	0	0	A_64_P163075	NM_001109321	4352.42	407.573	1.946213e+001	3.434209e+000	81	31	8.139304e+000	0	0	0	0	0	0	19.5302	1	1	65	32.6
DATA	2582	31	32	0	0	A_44_P393422	NM_001013188	4377.58	407.573	1.022123e+003	1.022514e+002	1053.5	30.5	7.063579e+000	0	0	0	0	0	0	1025.7	1	1	57.5363	31.0938
DATA	2583	31	33	0	0	A_44_P288982	NM_001107913	4403.42	407.573	8.294335e+001	8.763844e+000	143	33	8.128736e+000	0	0	0	0	0	0	83.2183	1	1	57.5363	34.1724
DATA	2584	31	34	0	0	A_64_P009788	NM_001191099	4428.72	408.015	1.550477e+001	3.227681e+000	75	30.5	8.105798e+000	0	0	0	0	0	0	15.5513	1	1	46.1809	31.3056
DATA	2585	31	35	0	0	A_42_P764228	NM_031707	4453.88	407.733	6.183445e+003	6.183510e+002	6200	31	7.678420e+000	0	0	0	0	0	0	6198.6	1	1	52.3208	30.3793
DATA	2586	31	36	0	0	A_64_P161621	NM_001101015	4479.19	408.094	3.707897e+002	3.718714e+001	440.5	29	6.700856e+000	0	0	0	0	0	0	371.452	1	1	45.835	29.5172
DATA	2587	31	37	0	0	A_42_P763522	NM_001013980	4504.14	408.472	3.896519e+003	3.896622e+002	3824	30	6.107843e+000	0	0	0	0	0	0	3900.28	1	1	46.8651	30.7333
DATA	2588	31	38	0	0	A_64_P029935	NM_001109299	4530.06	408.175	5.429191e+002	5.436612e+001	604	30	6.626005e+000	0	0	0	0	0	0	542.849	1	1	45.4864	29.2414
DATA	2589	31	39	0	0	A_64_P045053	A_64_P045053	4555.5	408.318	2.033146e+002	2.052929e+001	273.5	29.5	6.199664e+000	0	0	0	0	0	0	203.044	1	1	46.5243	29.4412
DATA	2590	31	40	0	0	A_42_P540920	NM_001135045	4580.57	408.343	4.804402e+003	4.804486e+002	4679	31	8.091961e+000	0	0	0	0	0	0	4791.49	1	1	46.5243	31.0625
DATA	2591	31	41	0	0	A_64_P055323	NM_001191930	4606.5	408	3.946909e+002	3.957197e+001	456	30.5	4.524443e+000	0	0	0	0	0	0	392.996	1	1	54.1152	29.8824
DATA	2592	31	42	0	0	A_64_P047162	NM_153472	4631.71	407.912	5.601654e+003	5.601727e+002	5646.5	33	8.758878e+000	0	0	0	0	0	0	5568.1	1	1	45.835	33.7778
DATA	2593	31	43	0	0	A_64_P279594	NM_001170476	4657.09	407.935	8.282099e+000	2.979267e+000	69	27	5.899358e+000	0	0	0	0	0	0	8.21716	1	0	54.4085	27.1875
DATA	2594	31	44	0	0	A_42_P665509	NM_053777	4682.5	408	4.987411e+004	4.987412e+003	49337	32	7.667708e+000	0	0	0	0	0	0	49383.3	1	1	54.1152	31.7368
DATA	2595	31	45	0	0	A_64_P106638	NM_001108198	4707.91	407.935	8.371434e+001	8.850998e+000	144.5	32	9.085068e+000	0	0	0	0	0	0	82.7095	1	1	65	32
DATA	2596	31	46	0	0	A_64_P141245	NM_001105920	4733	408.203	2.009732e+003	2.009938e+002	2018	31	7.819537e+000	0	0	0	0	0	0	1981.1	1	1	46.8651	31.875
DATA	2597	31	47	0	0	A_42_P503739	FQ231471	4758.38	408	1.606551e+004	1.606553e+003	15551	31	6.273515e+000	0	0	0	0	0	0	15797.2	1	1	48.5334	32.0968
DATA	2598	31	48	0	0	A_44_P282433	NM_033230	4783.84	408.103	4.935826e+002	4.944310e+001	542.5	30	5.378572e+000	0	0	0	0	0	0	484.073	1	1	46.5243	30.9355
DATA	2599	31	49	0	0	A_42_P585750	NM_001202463	4809.5	408	2.914629e+000	2.903878e+000	63	27	4.873271e+000	0	0	0	0	0	0	0.573598	0	0	54.1152	27.0345
DATA	2600	31	50	0	0	A_42_P523517	FQ229104	4834.63	408	8.011393e+003	8.011445e+002	7635	29	7.287932e+000	0	0	0	0	0	0	7812.7	1	1	48.5334	30.963
DATA	2601	31	51	0	0	A_64_P126190	NM_001113789	4860.59	408.082	2.075613e+001	3.583025e+000	80	32.5	9.064837e+000	0	0	0	0	0	0	20.179	1	1	48.5334	32.9667
DATA	2602	31	52	0	0	A_42_P549675	NM_080577	4885.38	408	4.414351e+003	4.414448e+002	4116	31.5	7.492909e+000	0	0	0	0	0	0	4278.39	1	1	48.5334	31.8333
DATA	2603	31	53	0	0	A_42_P535644	NM_024400	4911.01	408.1	4.544478e+002	4.553973e+001	492	36.5	1.075778e+001	0	0	0	0	0	0	439.003	1	1	46.8651	36.1667
DATA	2604	31	54	0	0	A_64_P050233	XM_345239	4936.75	408.194	2.328696e+002	2.347299e+001	293	35	9.708634e+000	0	0	0	0	0	0	224.187	1	1	45.835	35.5
DATA	2605	31	55	0	0	A_64_P121575	NM_001013144	4961.61	408.069	5.016436e+001	5.824392e+000	110.5	35	7.815271e+000	0	0	0	0	0	0	48.1278	1	1	53.8203	35.0385
DATA	2606	31	56	0	0	A_64_P018263	NM_012728	4987.43	408.203	2.664847e+002	2.681350e+001	314.5	33	8.596699e+000	0	0	0	0	0	0	254.734	1	1	46.8651	33.6452
DATA	2607	31	57	0	0	A_64_P164682	TC600307	5012.76	408	1.691784e+004	1.691786e+003	16027	34	7.949554e+000	0	0	0	0	0	0	16111.7	1	1	46.8651	33.6667
DATA	2608	31	58	0	0	A_44_P1045612	NM_172317	5037.99	408.118	5.099218e+002	5.107993e+001	544	30.5	7.705286e+000	0	0	0	0	0	0	483.797	1	1	46.8651	31.6667
DATA	2609	31	59	0	0	A_42_P529514	NM_001008308	5063.3	408.1	6.719605e+002	6.726318e+001	682	28	4.879167e+000	0	0	0	0	0	0	635.062	1	1	47.2035	29.037
DATA	2610	31	60	0	0	A_44_P870348	NM_001107522	5088.91	408.176	6.972384e+002	6.978906e+001	708	33.5	1.208928e+001	0	0	0	0	0	0	656.32	1	1	46.5243	34.9706
DATA	2611	31	61	0	0	A_64_P108264	XM_223835	5114.16	408.138	9.543472e+001	1.001251e+001	153	33	6.874261e+000	0	0	0	0	0	0	89.472	1	1	44.0646	32.4571
DATA	2612	31	62	0	0	A_42_P754784	CB328432	5139.57	408.311	7.990555e+003	7.990613e+002	7212	33	6.600306e+000	0	0	0	0	0	0	7460.63	1	1	48.5334	32.7241
DATA	2613	31	63	0	0	A_64_P084525	NM_001101001	5164.74	408.264	2.627609e+003	2.627786e+002	2458.5	31	8.102332e+000	0	0	0	0	0	0	2443.16	1	1	47.5395	30.8276
DATA	2614	31	64	0	0	A_64_P378583	NM_001099516	5190.42	408.427	3.078801e+000	3.074199e+000	61	33	9.830091e+000	0	0	0	0	0	0	1.97121	0	0	65	35.4545
DATA	2615	31	65	0	0	A_64_P154172	NM_001000557	5215.58	408.427	3.091935e+000	3.079901e+000	56	31	9.391754e+000	0	0	0	0	0	0	-6.08112	0	0	57.5363	31.9714
DATA	2616	31	66	0	0	A_64_P074634	NM_001024287	5241.34	407.869	1.406992e+002	1.440604e+001	195	28.5	6.154575e+000	0	0	0	0	0	0	129.131	1	1	44.0646	28
DATA	2617	31	67	1028	1	(+)E1A_r60_a22	E1A_r60_a22	5266.78	407.931	1.287978e+002	1.324931e+001	180	29	7.128317e+000	0	0	0	0	0	0	117.692	1	1	47.5395	28.7097
DATA	2618	31	68	0	0	A_43_P12780	NM_053350	5291.89	407.885	7.606669e+001	8.222012e+000	132	32	7.805940e+000	0	0	0	0	0	0	69.2053	1	1	44.7812	32.125
DATA	2619	31	69	0	0	A_44_P442169	NM_001013034	5317.44	408.466	3.813371e+003	3.813500e+002	3404.5	30	8.785624e+000	0	0	0	0	0	0	3454.35	1	1	49.1849	30.4828
DATA	2620	31	70	0	0	A_64_P093894	A_64_P093894	5342.58	408.427	3.378603e+001	4.618094e+000	92	29	6.303438e+000	0	0	0	0	0	0	30.4709	1	1	57.5363	29
DATA	2621	31	71	0	0	A_64_P073378	NM_001025287	5367.93	408.493	1.148238e+003	1.148673e+002	1074	30.5	8.813782e+000	0	0	0	0	0	0	1031.01	1	1	47.8731	30.8
DATA	2622	31	72	0	0	A_64_P096076	A_64_P096076	5393.5	408.5	3.188764e+000	3.176353e+000	54	30	7.118802e+000	0	0	0	0	0	0	-5.18042	0	0	57.5363	28.9655
DATA	2623	31	73	0	0	A_42_P471835	TC610276	5418.89	408.5	3.781708e+003	3.781842e+002	3200.5	31	7.062341e+000	0	0	0	0	0	0	3365.65	1	1	56.9804	30.72
DATA	2624	31	74	0	0	A_42_P767737	AY724480	5444.3	408.1	4.441270e+003	4.441386e+002	3808.5	34	7.500529e+000	0	0	0	0	0	0	3935.02	1	1	47.2035	32.0357
DATA	2625	31	75	0	0	A_64_P016393	A_64_P016393	5469.68	408.382	3.590245e+003	3.590389e+002	3244	31	7.641782e+000	0	0	0	0	0	0	3167.36	1	1	46.5243	31.7857
DATA	2626	31	76	0	0	A_42_P803752	XM_580093	5495.11	408.5	1.514191e+001	3.569424e+000	76	35	8.478457e+000	0	0	0	0	0	0	13.3012	1	0	56.9804	34.7931
DATA	2627	31	77	0	0	A_42_P589025	NM_134363	5520.5	408.5	6.854639e+004	6.854640e+003	59736	35.5	6.178817e+000	0	0	0	0	0	0	59957.5	1	1	57.5363	33.7778
DATA	2628	31	78	0	0	A_64_P107938	NM_001000930	5546.16	408.81	1.148393e+001	3.456088e+000	68.5	35	6.732205e+000	0	0	0	0	0	0	10.0032	1	0	43.7019	33.4516
DATA	2629	31	79	0	0	A_64_P088817	A_64_P088817	5571.52	408.575	4.064459e+002	4.077619e+001	412	28	7.208631e+000	0	0	0	0	0	0	352.563	1	1	48.8603	29.6333
DATA	2630	31	80	0	0	A_64_P000579	A_64_P000579	5596.76	408.859	2.186422e+004	2.186424e+003	18476	33	8.876467e+000	0	0	0	0	0	0	18890.8	1	1	47.5395	33.6667
DATA	2631	31	81	0	0	A_44_P570046	TC630334	5622.11	408.5	2.682001e+002	2.702221e+001	287	32	1.029695e+001	0	0	0	0	0	0	230.796	1	1	56.9804	34.2069
DATA	2632	31	82	0	0	A_44_P431629	NM_001106835	5647.5	408.5	8.318490e+001	8.953688e+000	127	27	7.807747e+000	0	0	0	0	0	0	71.3087	1	1	57.5363	28.2667
DATA	2634	31	84	0	0	A_42_P485932	NM_001034927	5698.38	408.5	1.359776e+004	1.359780e+003	11230	28.5	7.373941e+000	0	0	0	1	0	0	11571	1	1	48.5334	26.875
DATA	2635	31	85	66	1	DarkCorner	DarkCorner	5723.58	408.573	3.361279e+000	3.348196e+000	58	27	7.513055e+000	0	0	0	0	0	0	-1.95337	0	0	57.5363	28.4286
DATA	2636	32	1	66	1	DarkCorner	DarkCorner	3603.24	414.403	3.058407e+000	3.046504e+000	59	30	7.509823e+000	0	0	0	0	0	0	-1.12638	0	0	48.2044	29.25
DATA	2637	32	2	0	0	A_64_P048366	ENSRNOT00000059330	3628.75	414.361	1.438046e+003	1.438365e+002	1408	28	7.039788e+000	0	0	0	0	0	0	1346.41	1	1	51.0895	29.6
DATA	2638	32	3	0	0	A_44_P1058980	NM_001012036	3653.81	414.622	3.400728e+003	3.400862e+002	3162	29	8.026971e+000	0	0	0	0	0	0	3198.15	1	1	49.1849	30.0323
DATA	2639	32	4	0	0	A_64_P062562	ENSRNOT00000027655	3679.39	414.298	4.552199e+001	5.455289e+000	105	29	8.304385e+000	0	0	0	0	0	0	42.9951	1	1	46.1809	30.2826
DATA	2640	32	5	0	0	A_44_P490100	ENSRNOT00000043641	3704.76	414.68	4.249348e+001	5.197858e+000	101.5	31	9.181013e+000	0	0	0	0	0	0	40.3065	1	1	49.1849	28.9286
DATA	2641	32	6	0	0	A_42_P473886	NM_001165922	3730.42	414.573	3.039238e+002	3.053823e+001	348	27	7.477476e+000	0	0	0	0	0	0	289.472	1	1	57.5363	29.8667
DATA	2642	32	7	0	0	A_64_P393339	ENSRNOT00000057753	3755.58	414.573	4.366081e+001	5.280185e+000	100	32	9.213618e+000	0	0	0	0	0	0	41.7484	1	1	57.5363	31.8571
DATA	2643	32	8	0	0	A_44_P461154	NM_053819	3781	414.545	4.109353e+002	4.119986e+001	456	31	8.912459e+000	0	0	0	0	0	0	394.446	1	1	55.8519	31.2571
DATA	2644	32	9	0	0	A_42_P701991	NM_001100671	3806.43	414.768	3.804802e+003	3.804916e+002	3608	31	7.875571e+000	0	0	0	0	0	0	3665.82	1	1	46.8651	31.2308
DATA	2645	32	10	1028	1	(+)E1A_r60_1	E1A_r60_1	3831.58	414.573	2.948215e+000	2.936740e+000	60	28.5	1.019151e+001	0	0	0	0	0	0	-0.158745	0	0	57.5363	30.0625
DATA	2646	32	11	0	0	A_44_P541230	ENSRNOT00000010675	3857.07	415.117	1.944415e+003	1.944636e+002	1954	25	6.857834e+000	0	0	0	0	0	0	1886.57	1	1	44.4243	26.0667
DATA	2647	32	12	0	0	A_64_P004593	NM_001166761	3882.58	414.573	1.383257e+001	3.228400e+000	74	27	6.009639e+000	0	0	0	0	0	0	13.4643	1	0	57.5363	27.4828
DATA	2648	32	13	0	0	A_64_P018385	ENSRNOT00000063845	3908.01	414.962	6.200858e+000	2.973161e+000	68	28.5	7.539683e+000	0	0	0	0	0	0	6.05503	1	0	48.2044	28.1944
DATA	2649	32	14	0	0	A_64_P017590	NM_001000096	3933.42	414.573	2.910614e+000	2.899285e+000	61.5	31	8.070800e+000	0	0	0	0	0	0	-1.27236	0	0	57.5363	30.7429
DATA	2650	32	15	0	0	A_42_P810118	XM_001075984	3958.58	414.573	5.926343e+002	5.933392e+001	622	27	7.782153e+000	0	0	0	0	0	0	582.016	1	1	57.5363	29.4762
DATA	2651	32	16	0	0	A_42_P772157	NM_017020	3984.1	414.875	1.318329e+003	1.318644e+002	1359	29	7.974745e+000	0	0	0	0	0	0	1298.22	1	1	46.8651	28.3
DATA	2652	32	17	0	0	A_42_P542809	NM_021671	4009.5	415	4.114839e+002	4.124879e+001	452	30	8.685548e+000	0	0	0	0	0	0	406.229	1	1	54.1152	29.8519
DATA	2653	32	18	0	0	A_42_P645352	NM_001126371	4035.06	414.814	6.528908e+003	6.528971e+002	6436	30	7.196624e+000	0	0	0	0	0	0	6460.55	1	1	51.4001	30.5161
DATA	2654	32	19	0	0	A_64_P106933	NM_001130493	4060.64	414.843	3.919227e+001	4.853663e+000	98.5	32	4.896257e+000	0	0	0	0	0	0	38.8669	1	1	47.2035	30.84
DATA	2655	32	20	0	0	A_42_P614175	NM_033237	4085.79	414.806	1.004361e+003	1.004767e+002	1029	32	7.030921e+000	0	0	0	0	0	0	997.995	1	1	47.5395	31.9231
DATA	2656	32	21	0	0	A_64_P147190	NM_031840	4110.92	415.015	3.488208e+003	3.488325e+002	3532	30	6.611763e+000	0	0	0	0	0	0	3472.47	1	1	46.8651	30.5217
DATA	2657	32	22	0	0	A_43_P11268	NM_031762	4136.44	415.027	3.981734e+003	3.981836e+002	3975	28.5	7.673211e+000	0	0	0	0	0	0	3970.4	1	1	48.5334	29.5333
DATA	2658	32	23	0	0	A_64_P022215	A_64_P022215	4161.91	415.104	1.733952e+002	1.757108e+001	234.5	29.5	6.226331e+000	0	0	0	0	0	0	173.162	1	1	46.8651	30.7857
DATA	2659	32	24	0	0	A_64_P001080	NM_001109379	4187.21	415.162	1.422297e+002	1.450364e+001	199	32	5.473400e+000	0	0	0	0	0	0	142.225	1	1	46.1809	30.7353
DATA	2660	32	25	0	0	A_42_P468662	NM_001108886	4212.75	415	1.511590e+003	1.511856e+002	1547.5	34	1.085511e+001	0	0	0	0	0	0	1513.25	1	1	49.1849	34.2
DATA	2661	32	26	0	0	A_42_P522285	NM_001044263	4237.79	414.806	3.689702e+002	3.700567e+001	428	29.5	8.631338e+000	0	0	0	0	0	0	369.721	1	1	47.5395	30.375
DATA	2662	32	27	0	0	A_42_P478500	NM_177421	4263.5	415	1.472789e+005	1.472789e+004	147097	30	9.374984e+000	0	0	0	0	0	0	147700	1	1	54.1152	31.0968
DATA	2663	32	28	0	0	A_42_P739860	NM_133578	4288.56	415.028	1.821426e+003	1.821645e+002	1773	33	8.241398e+000	0	0	0	0	0	0	1827.74	1	1	48.2044	33.9286
DATA	2664	32	29	0	0	A_42_P708614	NM_001130505	4314.5	415	5.386912e+004	5.386913e+003	53386.5	31	7.173679e+000	0	0	0	0	0	0	54079.9	1	1	54.1152	31.5882
DATA	2665	32	30	0	0	A_64_P067000	NM_001108721	4339.66	415.123	5.366487e+002	5.373931e+001	602.5	32	6.948350e+000	0	0	0	0	0	0	538.893	1	1	48.5334	32.2903
DATA	2666	32	31	0	0	A_44_P590748	NM_001109199	4365	415.803	3.597443e+001	4.575406e+000	97.5	30.5	7.620930e+000	0	0	0	0	0	0	36.1303	1	1	44.4243	30.5833
DATA	2667	32	32	0	0	A_42_P742797	NM_001106761	4390.59	415.04	4.014939e+003	4.015039e+002	3979	32.5	8.480293e+000	0	0	0	0	0	0	4031.66	1	1	49.1849	32.7632
DATA	2668	32	33	0	0	A_42_P761277	NM_001008297	4415.79	414.806	1.022799e+003	1.023190e+002	1043	30.5	8.506378e+000	0	0	0	0	0	0	1026.76	1	1	47.5395	31.0385
DATA	2669	32	34	0	0	A_42_P503739	FQ231471	4441.24	415	1.664487e+004	1.664489e+003	16560	29	9.402075e+000	0	0	0	0	0	0	16702.3	1	1	46.8651	31.5517
DATA	2670	32	35	0	0	A_42_P635760	ENSRNOT00000023806	4466.43	414.761	8.361655e+003	8.361703e+002	8271	30	9.414964e+000	0	0	0	0	0	0	8385.2	1	1	46.5243	31.1923
DATA	2671	32	36	0	0	A_64_P136337	ENSRNOT00000064588	4492.09	414.924	3.714578e+003	3.714686e+002	3641.5	31	8.219460e+000	0	0	0	0	0	0	3722.14	1	1	46.5243	31.6786
DATA	2672	32	37	0	0	A_64_P128316	ENSRNOT00000062007	4517.5	415.352	1.625104e+001	3.268813e+000	75	28	5.338406e+000	0	0	0	0	0	0	16.2692	1	1	57.5363	29.037
DATA	2673	32	38	0	0	A_64_P050799	A_64_P050799	4542.69	415.236	1.447016e+002	1.474611e+001	208.5	30	6.910137e+000	0	0	0	0	0	0	144.7	1	1	47.8731	29.25
DATA	2674	32	39	0	0	A_42_P701779	NM_001108048	4567.93	415.507	2.157482e+003	2.157669e+002	2123	32	7.402548e+000	0	0	0	0	0	0	2154.75	1	1	48.5334	31.5185
DATA	2675	32	40	0	0	A_42_P604900	NM_199117	4593.87	415.5	4.811922e+003	4.812007e+002	4722.5	30	7.064106e+000	0	0	0	0	0	0	4798.68	1	1	49.8279	30.3889
DATA	2676	32	41	0	0	A_44_P1060444	NM_001106644	4618.94	414.825	3.790721e+003	3.790829e+002	3728	31	7.104265e+000	0	0	0	0	0	0	3773.99	1	1	45.4864	32.1176
DATA	2677	32	42	0	0	A_64_P090339	NM_001000756	4644.1	415.102	4.834295e+001	5.615381e+000	110	27	6.908428e+000	0	0	0	0	0	0	48.0461	1	1	43.7019	29.0294
DATA	2678	32	43	0	0	A_42_P770556	NM_033096	4669.6	415.151	7.443889e+003	7.443945e+002	7301	31	7.974745e+000	0	0	0	0	0	0	7383.85	1	1	48.5334	31.3
DATA	2679	32	44	0	0	A_44_P606502	NM_001130502	4695.42	415.427	1.188739e+001	3.105053e+000	73	34	8.777069e+000	0	0	0	0	0	0	11.7668	1	0	65	33.5862
DATA	2680	32	45	0	0	A_64_P372189	NM_212516	4720.58	415.427	5.525226e+004	5.525226e+003	54345	31	8.252865e+000	0	0	0	0	0	0	54570.4	1	1	57.5363	32.5357
DATA	2681	32	46	0	0	A_42_P540518	NM_199399	4745.8	415.4	3.437899e+003	3.438020e+002	3290.5	30	7.163528e+000	0	0	0	0	0	0	3387.41	1	1	49.1849	30.871
DATA	2682	32	47	0	0	A_64_P158955	ENSRNOT00000020260	4771.42	415.427	2.908773e+001	4.099727e+000	91.5	31	5.607063e+000	0	0	0	0	0	0	28.5875	1	1	57.5363	32.4286
DATA	2683	32	48	0	0	A_44_P325841	NM_024130	4796.53	415.432	1.367054e+003	1.367360e+002	1403	29.5	7.201931e+000	0	0	0	0	0	0	1340	1	1	49.1849	30.1667
DATA	2684	32	49	0	0	A_64_P007743	XM_001071416	4822.27	415.076	1.531078e+002	1.558396e+001	208	27	5.048762e+000	0	0	0	0	0	0	149.644	1	1	45.835	27.64
DATA	2685	32	50	0	0	A_64_P136213	A_64_P136213	4847.5	415.5	3.399207e+000	2.933247e+000	63.5	29	9.543327e+000	0	0	0	0	0	0	3.31277	1	0	57.5363	32.4348
DATA	2686	32	51	0	0	A_43_P17392	NM_001191693	4872.75	415.356	2.364727e+003	2.364908e+002	2324	33	8.971335e+000	0	0	0	0	0	0	2297.53	1	1	48.5334	33.2121
DATA	2687	32	52	0	0	A_42_P708569	NM_001191837	4898.3	415.493	8.419111e+003	8.419162e+002	8251	33	9.807695e+000	0	0	0	0	0	0	8153.73	1	1	46.8651	33.963
DATA	2688	32	53	0	0	A_64_P062068	XM_002728030	4923.63	415.5	3.474187e+002	3.486617e+001	390	31.5	1.053714e+001	0	0	0	0	0	0	335.358	1	1	49.8279	33.5313
DATA	2689	32	54	0	0	A_43_P20266	NM_001106416	4949.11	415.5	1.302661e+002	1.335682e+001	185	31.5	7.220342e+000	0	0	0	0	0	0	125.312	1	1	56.9804	32.7333
DATA	2690	32	55	0	0	A_44_P248235	NM_001106048	4974.49	416.03	3.264530e+001	4.407946e+000	91	34	7.499425e+000	0	0	0	0	0	0	31.2951	1	1	46.1809	33.7931
DATA	2691	32	56	0	0	A_64_P134717	NM_001101007	4999.89	415.5	4.497052e+000	3.006720e+000	64	29	6.772176e+000	0	0	0	0	0	0	4.2951	1	0	56.9804	28.9355
DATA	2692	32	57	0	0	A_44_P555005	NM_001000944	5025.42	415.573	5.374581e+001	6.147417e+000	110	31.5	9.079534e+000	0	0	0	0	0	0	51.1403	1	1	65	31.9
DATA	2693	32	58	0	0	A_42_P832028	NM_001006978	5050.58	415.573	1.015913e+003	1.016354e+002	1023	28	5.506367e+000	0	0	0	0	0	0	963.002	1	1	57.5363	28.1515
DATA	2694	32	59	0	0	A_42_P768380	NM_001100158	5075.88	415.397	7.157444e+003	7.157507e+002	6551	32	9.814864e+000	0	0	0	0	0	0	6758.1	1	1	48.5334	33.1765
DATA	2695	32	60	0	0	A_42_P585530	NM_001037791	5101.38	415.556	5.237516e+002	5.246211e+001	540	30	9.722810e+000	0	0	0	0	0	0	492.561	1	1	48.2044	30.4595
[truncated: 6,311,667 more chars]
