# Supplementary material for: Gene Expression in the Hippocampus in a Rat Model of Premenstrual Dysphoric Disorder After Treatment With Baixiangdan Capsules
Source: Front Psychol. 2018 Nov 13;9:2065. doi: 10.3389/fpsyg.2018.02065 (PMC6242977; doi:10.3389/fpsyg.2018.02065)
Supplement: Supplementary file 2 [file Data_Sheet_2.ZIP › Raw Data Files/6_25.txt]

TYPE	text	text	text	integer	text	float	float	text	integer	text	text	integer	integer	integer	integer	float	float	float	float	float	float	text	text	text	text	text	text	text	text	text	text	text	integer	integer	integer	text	integer	boolean
FEPARAMS	Protocol_Name	Protocol_date	Scan_ScannerName	Scan_NumChannels	Scan_Date	Scan_MicronsPerPixelX	Scan_MicronsPerPixelY	Scan_OriginalGUID	Scan_NumScanPass	Grid_Name	Grid_Date	Grid_NumSubGridRows	Grid_NumSubGridCols	Grid_NumRows	Grid_NumCols	Grid_RowSpacing	Grid_ColSpacing	Grid_OffsetX	Grid_OffsetY	Grid_NomSpotWidth	Grid_NomSpotHeight	Grid_GenomicBuild	FeatureExtractor_Barcode	FeatureExtractor_Sample	FeatureExtractor_ScanFileName	FeatureExtractor_ArrayName	FeatureExtractor_ScanFileGUID	FeatureExtractor_DesignFileName	FeatureExtractor_ExtractionTime	FeatureExtractor_UserName	FeatureExtractor_ComputerName	FeatureExtractor_Version	FeatureExtractor_IsXDRExtraction	FeatureExtractor_ColorMode	FeatureExtractor_QCReportType	DyeNorm_NormFilename	DyeNorm_NormNumProbes	Grid_IsGridFile
DATA	GE1_1100_Jul11 (Read Only)	1-Jul-2011 22:30	Agilent Technologies Scanner G2505C US10450393	1	07-19-2013 10:55:47	5	5	891b3bcf-7e8d-49b3-9f1b-211571655d1e	1	028282_D_F_20120224	24-Feb-2012 00:00	1	1	532	85	73.3235	63.5	0	36.6617	65	65	rn4:RGSCv3.4:Nov2004	1_2		M:\2013.07.19 Rat GE 1-color 4x44k(sunpeng)\\US10450393_S01.tif	US10450393_S01	0de24e3c-411a-4c92-b222-bf3524e92ef4	028282_D_F_20120224.xml	19-Jul-2013 11:52:30	admin	KCSY01	11.0.1.1	0	0	0		0	0
*
TYPE	float	float	float	integer	integer	float	float	float	integer	float	float	float	integer	float	float	integer	integer	integer	integer	integer	float	float	float	integer	float	float	float	float	float	integer	integer	float	float	float	float	float	integer	float	float	float	float	integer	float	float	float	float	float	integer	float	float	float	float	float	float	float	integer	float	integer	float	float	float	float	integer	float	float	float	float	text	float	float	float	float	float	float	float	float	float	float	float	float	float	float	float	float	float	float	float	float	float	integer	integer	integer	integer	float	integer	text	integer	text	float	float	float	integer	boolean	float	float	boolean	float	boolean	float	boolean	float	boolean	float	boolean	float	boolean	float	boolean	float	boolean	float	boolean	float	boolean	float	boolean
STATS	gDarkOffsetAverage	gDarkOffsetMedian	gDarkOffsetStdDev	gDarkOffsetNumPts	gSaturationValue	gAvgSig2BkgeQC	gAvgSig2BkgNegCtrl	gRatioSig2BkgeQC_NegCtrl	gNumSatFeat	gLocalBGInlierNetAve	gLocalBGInlierAve	gLocalBGInlierSDev	gLocalBGInlierNum	gGlobalBGInlierAve	gGlobalBGInlierSDev	gGlobalBGInlierNum	gNumFeatureNonUnifOL	gNumPopnOL	gNumNonUnifBGOL	gNumPopnBGOL	gOffsetUsed	gGlobalFeatInlierAve	gGlobalFeatInlierSDev	gGlobalFeatInlierNum	AnyColorPrcntFeatNonUnifOL	AnyColorPrcntBGNonUnifOL	AnyColorPrcntFeatPopnOL	AnyColorPrcntBGPopnOL	TotalPrcntFeatOL	gNumNegBGSubFeat	gNonCtrlNumNegFeatBGSubSig	gSpatialDetrendRMSFit	gSpatialDetrendRMSFilteredMinusFit	gSpatialDetrendSurfaceArea	gSpatialDetrendVolume	gSpatialDetrendAveFit	gNonCtrlNumSatFeat	gNonCtrl99PrcntNetSig	gNonCtrl50PrcntNetSig	gNonCtrl1PrcntNetSig	gNonCtrlMedPrcntCVBGSubSig	gCtrleQCNumSatFeat	gCtrleQC99PrcntNetSig	gCtrleQC50PrcntNetSig	gCtrleQC1PrcntNetSig	geQCMedPrcntCVBGSubSig	geQCSig2BkgLow2	gNegCtrlNumInliers	gNegCtrlAveNetSig	gNegCtrlSDevNetSig	gNegCtrlAveBGSubSig	gNegCtrlSDevBGSubSig	gAveNumPixOLLo	gAveNumPixOLHi	gPixCVofHighSignalFeat	gNumHighSignalFeat	AddErrorEstimateGreen	TotalNumFeatures	ROIHeight	ROIWidth	CentroidDiffX	CentroidDiffY	NumFoundFeat	MaxNonUnifEdges	MaxSpotNotFoundEdges	gMultDetrendRMSFit	gMultDetrendSurfaceAverage	eQCLowSigName2	eQCOneColorLogLowSignal	eQCOneColorLogLowSignalError	eQCOneColorLogHighSignal	eQCOneColorLinFitLogLowConc	eQCOneColorLinFitLogLowSignal	eQCOneColorLinFitLogHighConc	eQCOneColorLinFitLogHighSignal	eQCOneColorLinFitSlope	eQCOneColorLinFitIntercept	eQCOneColorLinFitRSQ	eQCOneColorSpikeDetectionLimit	gNonCtrl50PrcntBGSubSig	gCtrleQC50PrcntBGSubSig	gMedPrcntCVProcSignal	geQCMedPrcntCVProcSignal	gOutlierFlagger_Auto_FeatB_Term	gOutlierFlagger_Auto_FeatC_Term	gOutlierFlagger_Auto_BgndB_Term	gOutlierFlagger_Auto_BgndC_Term	OutlierFlagger_FeatChiSq	OutlierFlagger_BgndChiSq	GriddingStatus	IsGoodGrid	NumGeneNonUnifOL	TotalNumberOfReplicatedGenes	gPercentileIntensityProcessedSignal	ExtractionStatus	QCMetricResults	gNonCtrlNumWellAboveBG	ImageDepth	AFHold	gPMTVolts	GlassThickness	gDDN	GridHasBeenOptimized	gNegCtrlSpread	Metric_IsGoodGrid	Metric_IsGoodGrid_IsInRange	Metric_AnyColorPrcntFeatNonUnifOL	Metric_AnyColorPrcntFeatNonUnifOL_IsInRange	Metric_gNegCtrlAveNetSig	Metric_gNegCtrlAveNetSig_IsInRange	Metric_gNegCtrlAveBGSubSig	Metric_gNegCtrlAveBGSubSig_IsInRange	Metric_gNegCtrlSDevBGSubSig	Metric_gNegCtrlSDevBGSubSig_IsInRange	Metric_gSpatialDetrendRMSFilteredMinusFit	Metric_gSpatialDetrendRMSFilteredMinusFit_IsInRange	Metric_gNonCntrlMedCVProcSignal	Metric_gNonCntrlMedCVProcSignal_IsInRange	Metric_gE1aMedCVProcSignal	Metric_gE1aMedCVProcSignal_IsInRange	Metric_absGE1E1aSlope	Metric_absGE1E1aSlope_IsInRange	Metric_DetectionLimit	Metric_DetectionLimit_IsInRange	Metric_gDDN	Metric_gDDN_IsInRange
DATA	7.24727	7.24727	1.71313	0	778248	1.29597	1.52461	0.850031	0	36.0872	43.3345	3.72325	43439	43.3345	3.72325	43439	10	462	32	815	7.24727	2019.88	6924.4	43784	0.0225968	0.0723098	1.04397	1.84164	0.0233225	1948	1229	2.35421	3.1864	1.00441	8.25485	67.5997	0	28981	255.909	56.2912	9.21801	0	197.399	64.2117	52.3709	-1	1.27818	148	54.341	3.6718	-5.94295	3.07369	0.429182	0.75792	0.12397	2845	3.1864	44254	4.36651	7.61785	0.785523	0.854216	41956	0	0.093985	0.0732782	1.00028	(+)E1A_r60_3	0	0	0	0	0	0	0	0	0	0	-1	195.526	3.5226	3.62944	-1	1179	97.4065	121.68	66.6946	1.94536	2.50719	0	1	7	30367	1302.69	1	ExtractionEvaluate	36313	20 Bit	0	354	968.949	0	0	11.0573	1	1	0.0225968	1	54.341	0	-5.94295	1	3.07369	1	3.1864	1	3.62944	1	-1	0	0	0	-1	0	0	1
*
TYPE	integer	integer	integer	integer	integer	text	text	float	float	float	float	float	float	float	boolean	boolean	boolean	boolean	boolean	boolean	float	boolean	boolean	float	float
FEATURES	FeatureNum	Row	Col	SubTypeMask	ControlType	ProbeName	SystematicName	PositionX	PositionY	gProcessedSignal	gProcessedSigError	gMedianSignal	gBGMedianSignal	gBGPixSDev	gIsSaturated	gIsFeatNonUnifOL	gIsBGNonUnifOL	gIsFeatPopnOL	gIsBGPopnOL	IsManualFlag	gBGSubSignal	gIsPosAndSignif	gIsWellAboveBG	SpotExtentX	gBGMeanSignal
DATA	1	1	1	260	1	GE_BrightCorner	GE_BrightCorner	3587.65	177.888	2.226988e+004	2.226991e+003	20554	38	8.562963e+000	0	0	0	0	0	0	20454.1	1	1	52.9257	38.9516
DATA	2	1	2	66	1	DarkCorner	DarkCorner	3613.5	178	1.037365e+001	3.606543e+000	69.5	40	8.959318e+000	0	0	0	0	0	0	9.56958	1	0	54.1152	40.8586
DATA	3	1	3	66	1	DarkCorner	DarkCorner	3638.71	178	9.070250e+000	3.557249e+000	67.5	42	9.068719e+000	0	0	0	0	0	0	8.4024	1	0	54.1152	42.9858
DATA	4	1	4	66	1	DarkCorner	DarkCorner	3664.21	177.757	6.684284e+000	3.489999e+000	66	43	8.975294e+000	0	0	0	0	0	0	6.21793	1	0	46.8651	43.6569
DATA	5	1	5	66	1	DarkCorner	DarkCorner	3689.24	177.847	7.222357e+000	3.487351e+000	68	44	9.519049e+000	0	0	0	0	0	0	6.74533	1	0	47.8731	44.1893
DATA	6	1	6	66	1	DarkCorner	DarkCorner	3715	178	4.869300e+000	3.432827e+000	63	41	9.733616e+000	0	0	0	0	0	0	4.56593	1	0	54.9904	42.044
DATA	7	1	7	66	1	DarkCorner	DarkCorner	3740.5	178	9.029741e+000	3.503456e+000	69	42	9.253986e+000	0	0	0	0	0	0	8.49974	1	0	54.1152	42.5437
DATA	8	1	8	66	1	DarkCorner	DarkCorner	3765.1	178.379	5.135788e+000	3.411865e+000	65	41	9.002821e+000	0	0	0	0	0	0	4.85168	1	0	42.9674	42.354
DATA	9	1	9	66	1	DarkCorner	DarkCorner	3791.5	178	4.090276e+000	3.385338e+000	65	41	9.314501e+000	0	0	0	0	0	0	3.87833	1	0	54.1152	42.4771
DATA	10	1	10	66	1	DarkCorner	DarkCorner	3816.5	178.352	3.361769e+000	3.355555e+000	63	41	9.644742e+000	0	0	0	0	0	0	1.94894	0	0	65	42.2941
DATA	11	1	11	66	1	DarkCorner	DarkCorner	3842.25	178.764	3.350730e+000	3.338299e+000	60.5	42	1.017345e+001	0	0	0	0	0	0	-0.502888	0	0	41.4593	42.4098
DATA	12	1	12	0	0	A_64_P076162	A_64_P076162	3867.55	178.257	4.779512e+001	5.824066e+000	106.5	40	8.972926e+000	0	0	0	0	0	0	45.7607	1	1	48.8603	40.8893
DATA	13	1	13	0	0	A_64_P002176	NM_001170551	3892.38	178	4.567235e+002	4.579276e+001	493	39	8.068400e+000	0	0	0	0	0	0	438.527	1	1	48.5334	39.6488
DATA	14	1	14	0	0	A_42_P664913	NM_001108400	3917.51	178.346	3.551338e+002	3.566727e+001	403	38	8.583225e+000	0	0	0	0	0	0	341.903	1	1	51.4001	38.8024
DATA	15	1	15	0	0	A_43_P13320	NM_138880	3942.92	178.649	2.060204e+001	3.891443e+000	81	38	8.660663e+000	0	0	0	0	0	0	19.8847	1	1	49.5074	39.3738
DATA	16	1	16	0	0	A_64_P126523	A_64_P126523	3969	178.455	3.774803e+001	5.009584e+000	99	40	8.988289e+000	0	0	0	0	0	0	36.5211	1	1	55.8519	39.7848
DATA	17	1	17	0	0	A_64_P038045	XM_002730109	3994.42	178.427	3.846530e+001	5.059308e+000	102	39	8.405283e+000	0	0	0	0	0	0	37.2942	1	1	57.5363	39.163
DATA	18	1	18	0	0	A_43_P11804	NM_017066	4019.31	178.338	1.060203e+004	1.060208e+003	10177	39	8.472672e+000	0	0	0	0	0	0	10298.6	1	1	48.5334	39.1807
DATA	19	1	19	0	0	A_44_P808710	XM_001069205	4045.33	178.5	3.718791e+001	4.955048e+000	97	40	9.679718e+000	0	0	0	0	0	0	36.1861	1	1	65	40.3525
DATA	20	1	20	0	0	A_64_P142111	NM_001100887	4070.31	178.338	7.069315e+002	7.076873e+001	757.5	39	9.152087e+000	0	0	0	0	0	0	688.887	1	1	48.5334	39.3658
DATA	21	1	21	0	0	A_64_P095642	A_64_P095642	4095.89	178.5	1.121460e+002	1.168043e+001	170	40	8.990981e+000	0	0	0	0	0	0	109.421	1	1	56.9804	40.2958
DATA	22	1	22	0	0	A_42_P735279	NM_001004446	4120.87	178.5	1.153766e+004	1.153771e+003	11130	40	8.777293e+000	0	0	0	0	0	0	11268.6	1	1	49.8279	40.8489
DATA	23	1	23	0	0	A_44_P902822	XM_001063709	4146.18	178.339	3.604138e+001	4.859727e+000	97	40	8.850133e+000	0	0	0	0	0	0	35.2285	1	1	44.4243	40.7598
DATA	24	1	24	0	0	A_42_P563843	NM_022263	4172.33	178.5	8.572990e+000	3.369003e+000	69	40	8.261601e+000	0	0	0	0	0	0	8.38433	1	0	57.5363	40.9047
DATA	25	1	25	0	0	A_42_P610788	NM_031544	4197.12	178.384	2.642645e+003	2.642846e+002	2605.5	39	8.240138e+000	0	0	0	0	0	0	2585.27	1	1	48.5334	39.813
DATA	26	1	26	0	0	A_44_P242429	NM_001134842	4222.57	178.608	1.186767e+003	1.187214e+002	1193	40	8.869783e+000	0	0	0	0	0	0	1161.08	1	1	49.1849	40.313
DATA	27	1	27	0	0	A_64_P020571	NM_001031659	4247.88	178.459	2.251888e+002	2.275327e+001	270.5	41	9.790858e+000	0	0	0	0	0	0	220.277	1	1	48.8603	41.7683
DATA	28	1	28	0	0	A_42_P518462	NM_001007020	4273.3	178.507	3.657222e+003	3.657367e+002	3573	40	9.078810e+000	0	0	0	0	0	0	3575.96	1	1	46.8651	40.4894
DATA	29	1	29	0	0	A_42_P469751	XM_001054007	4298.81	178.519	1.070336e+003	1.070832e+002	1115.5	41	9.466665e+000	0	0	0	0	0	0	1045.86	1	1	49.8279	42.0626
DATA	30	1	30	0	0	A_44_P209459	NM_022387	4324.22	178.824	5.111224e+003	5.111328e+002	4910.5	41	9.416062e+000	0	0	0	0	0	0	4989.79	1	1	48.2044	41.8958
DATA	31	1	31	0	0	A_64_P018547	NM_001108717	4349.59	178.72	5.590853e+002	5.600394e+001	612	41	1.014036e+001	0	0	0	0	0	0	545.178	1	1	48.8603	41.9824
DATA	32	1	32	0	0	A_64_P111513	A_64_P111513	4374.85	178.244	2.223677e+001	3.956255e+000	85	40	9.519766e+000	0	0	0	0	0	0	21.6538	1	1	50.7771	40.7509
DATA	33	1	33	0	0	A_42_P493925	NM_198785	4400.58	178.573	2.207689e+002	2.231887e+001	274	40	9.564422e+000	0	0	0	0	0	0	214.625	1	1	57.5363	40.4322
DATA	34	1	34	0	0	A_64_P049828	NM_012543	4425.56	178.733	8.249173e+002	8.255706e+001	850	40	9.103882e+000	0	0	0	0	0	0	800.485	1	1	49.1849	40.1715
DATA	35	1	35	0	0	A_64_P137927	NM_001191885	4451.16	178.725	1.450364e+002	1.487225e+001	202	39	9.335707e+000	0	0	0	0	0	0	140.442	1	1	50.4627	39.7193
DATA	36	1	36	0	0	A_43_P19848	NM_001106018	4476.58	178.573	3.080100e+001	4.512878e+000	92	40	8.844620e+000	0	0	0	0	0	0	29.7557	1	1	57.5363	40.3613
DATA	37	1	37	0	0	A_44_P308673	NM_139108	4502.18	178.622	1.627624e+002	1.660878e+001	217	39	9.653361e+000	0	0	0	0	0	0	156.832	1	1	51.0895	40.3676
DATA	38	1	38	0	0	A_64_P004269	NM_001191660	4527.34	178.878	1.063335e+003	1.063851e+002	1062	38	9.022662e+000	0	0	0	0	0	0	1021.75	1	1	48.8603	38.4359
DATA	39	1	39	0	0	A_42_P543670	NM_012572	4552.59	179.041	1.327235e+002	1.368275e+001	197	38	9.188945e+000	0	0	0	0	0	0	127.152	1	1	48.8603	38.5988
DATA	40	1	40	0	0	A_64_P164696	TC605704	4578.51	178.257	3.349436e+000	3.337010e+000	64	37	8.978308e+000	0	0	0	0	0	0	-0.155534	0	0	47.2035	37.8964
DATA	41	1	41	0	0	A_64_P055763	NM_001191822	4603.63	178.63	5.356757e+003	5.356861e+002	5182	37	8.960852e+000	0	0	0	0	0	0	5097.59	1	1	48.2044	37.675
DATA	42	1	42	0	0	A_64_P068622	NM_001013056	4628.94	179.031	1.051936e+003	1.052473e+002	1051	38	9.141259e+000	0	0	0	0	0	0	997.411	1	1	46.8651	38.2535
DATA	43	1	43	0	0	A_44_P915877	XM_001065403	4654.5	179	1.256695e+002	1.301190e+001	179	37	8.827334e+000	0	0	0	0	0	0	118.696	1	1	54.1152	37.3913
DATA	44	1	44	0	0	A_42_P647599	NM_024129	4680	179	1.498385e+002	1.536195e+001	202	36.5	7.992593e+000	0	0	0	1	0	0	140.951	1	1	54.9904	37.0518
DATA	45	1	45	0	0	A_42_P798776	XM_002725203	4705.24	179	2.254922e+003	2.255179e+002	2107	37	8.037513e+000	0	0	0	0	0	0	2112.3	1	1	46.8651	37.2
DATA	46	1	46	0	0	A_42_P781735	NM_053319	4730.5	179	5.474238e+004	5.474239e+003	49828.5	36	9.352912e+000	0	0	0	0	0	0	51056.4	1	1	54.1152	37.4016
DATA	47	1	47	0	0	A_42_P553611	TC630296	4755.87	178.987	1.853872e+003	1.854190e+002	1780.5	37	8.631218e+000	0	0	0	0	0	0	1721.19	1	1	47.5395	37.2505
DATA	48	1	48	0	0	A_43_P12729	NM_032615	4781.24	179	2.162112e+003	2.162387e+002	2056	36	7.867711e+000	0	0	0	0	0	0	1997.93	1	1	46.8651	36.6112
DATA	49	1	49	0	0	A_42_P507072	FQ213070	4806.79	178.806	1.873675e+003	1.873996e+002	1769	36	8.150240e+000	0	0	0	0	0	0	1722.94	1	1	47.5395	36.2992
DATA	50	1	50	0	0	A_42_P645467	NM_001108804	4831.29	178.782	2.325839e+001	4.187289e+000	84	36	8.393558e+000	0	0	0	0	0	0	21.2843	1	1	41.4593	36.8558
DATA	51	1	51	0	0	A_42_P738431	NM_019175	4857.5	179	1.580412e+003	1.580799e+002	1475	35	7.537830e+000	0	0	0	0	0	0	1438.64	1	1	54.1152	35.9293
DATA	52	1	52	0	0	A_42_P712297	NM_001135583	4882.79	178.806	3.970488e+003	3.970644e+002	3618	36	8.509235e+000	0	0	0	0	0	0	3595.48	1	1	47.5395	36.3599
DATA	53	1	53	0	0	A_42_P657538	NM_001008362	4908.59	179.092	1.273633e+003	1.274124e+002	1200.5	36	7.777374e+000	0	0	0	0	0	0	1147.09	1	1	49.1849	35.7706
DATA	54	1	54	0	0	A_42_P515405	NM_212505	4933.73	179.225	3.475376e+002	3.493532e+001	364.5	36	7.949499e+000	0	0	0	1	0	0	311.326	1	1	47.2035	36.8642
DATA	55	1	55	0	0	A_64_P089886	NM_053476	4959.11	179.338	1.989212e+003	1.989534e+002	1818	37	7.846434e+000	0	0	0	0	0	0	1772.14	1	1	47.8731	36.8039
DATA	56	1	56	0	0	A_42_P528580	NM_001107528	4984.31	178.986	2.440907e+003	2.441172e+002	2181	36	8.176423e+000	0	0	0	0	0	0	2162.5	1	1	47.2035	36.4136
DATA	57	1	57	0	0	A_43_P14285	NM_001034145	5010.09	178.672	4.700425e+003	4.700564e+002	4201	37	7.688695e+000	0	0	0	0	0	0	4140.48	1	1	45.1352	37.2114
DATA	58	1	58	0	0	A_42_P616287	NM_001134555	5035.5	179.352	1.721049e+002	1.759077e+001	214	36	8.079413e+000	0	0	0	0	0	0	150.746	1	1	57.5363	36.9209
DATA	59	1	59	0	0	A_42_P496411	NM_001109410	5060.63	178.735	2.394438e+003	2.394718e+002	2144	36	7.992006e+000	0	0	0	1	0	0	2085.42	1	1	46.5243	36.2126
DATA	60	1	60	0	0	A_44_P494310	NM_001009604	5086.06	179.3	2.920706e+003	2.920938e+002	2494	36	7.845876e+000	0	0	0	0	0	0	2529.29	1	1	46.8651	36.3857
DATA	61	1	61	0	0	A_42_P645142	NM_019375	5111.65	179.286	3.770019e+002	3.788140e+001	386	36	7.545284e+000	0	0	0	1	0	0	324.605	1	1	49.8279	36.5167
DATA	62	1	62	0	0	A_64_P042132	AABR03024196	5137.12	179.562	6.509301e+003	6.509407e+002	5703	36	7.861436e+000	0	0	0	0	0	0	5572.77	1	1	52.9257	36.4804
DATA	63	1	63	0	0	A_42_P508085	NM_001009620	5162.2	179.28	1.191402e+003	1.191990e+002	1043	36	7.505685e+000	0	0	0	0	0	0	1014.3	1	1	49.1849	35.8298
DATA	64	1	64	0	0	A_64_P051159	NM_001100684	5187.5	179.705	7.839455e+002	7.848484e+001	708.5	36	7.590866e+000	0	0	0	0	0	0	663.713	1	1	50.4627	36.3169
DATA	65	1	65	0	0	A_64_P124041	ENSRNOT00000019667	5213.42	179.427	1.142148e+002	1.203228e+001	154.5	35	7.417067e+000	0	0	0	0	0	0	96.1534	1	1	57.5363	35.6917
DATA	66	1	66	0	0	A_64_P131122	XR_086302	5238.58	179.427	5.499525e+001	6.687714e+000	107	36	7.784480e+000	0	0	0	0	0	0	46.0501	1	1	57.5363	36.3918
DATA	67	1	67	0	0	A_64_P021601	NM_031737	5263.84	179.043	7.816479e+001	8.702452e+000	129	35	7.464536e+000	0	0	0	0	0	0	65.1044	1	1	46.8651	36.0233
DATA	68	1	68	0	0	A_44_P776423	NM_001017386	5289.25	179.373	1.108952e+004	1.108958e+003	9188	36	7.859385e+000	0	0	0	0	0	0	9188.85	1	1	46.1809	36.8019
DATA	69	1	69	0	0	A_64_P120445	NM_080694	5314.82	179.197	4.344764e+001	5.815152e+000	96	37	8.067664e+000	0	0	0	0	0	0	35.8184	1	1	46.1809	37.4084
DATA	70	1	70	0	0	A_42_P772878	NM_001011936	5339.93	179.583	1.686643e+003	1.687091e+002	1429.5	36	7.795623e+000	0	0	0	0	0	0	1383.81	1	1	48.2044	36.7608
DATA	71	1	71	0	0	A_42_P736315	NM_001108321	5365.37	179.64	2.151200e+003	2.151554e+002	1736	35.5	7.258843e+000	0	0	0	0	0	0	1756.69	1	1	48.8603	35.7725
DATA	73	1	73	0	0	A_64_P041004	NM_001108599	5416.34	179.122	1.072932e+004	1.072939e+003	8614	37	8.178802e+000	0	0	0	0	0	0	8685.11	1	1	48.8603	36.8899
DATA	74	1	74	0	0	A_42_P494276	NM_001109663	5441.63	179.36	4.917388e+002	4.933243e+001	439.5	36	8.007699e+000	0	0	0	0	0	0	396.476	1	1	48.8603	36.3428
DATA	75	1	75	66	1	DarkCorner	DarkCorner	5467.13	179.324	3.981563e+000	3.966791e+000	60	35	8.049203e+000	0	0	0	0	0	0	-0.113758	0	0	47.5395	36.3177
DATA	76	1	76	66	1	DarkCorner	DarkCorner	5492.5	179.5	3.995133e+000	3.980311e+000	59.5	36	7.900355e+000	0	0	0	0	0	0	-2.36903	0	0	57.5363	36.4701
DATA	77	1	77	66	1	DarkCorner	DarkCorner	5518	179.545	4.007542e+000	3.992673e+000	58	36	7.619269e+000	0	0	0	0	0	0	-2.69469	0	0	55.8519	35.8979
DATA	78	1	78	66	1	DarkCorner	DarkCorner	5543.84	179.477	4.018743e+000	4.003833e+000	60	36	7.979607e+000	0	0	0	0	0	0	-0.859552	0	0	37.4241	36.7239
DATA	79	1	79	66	1	DarkCorner	DarkCorner	5568.51	179.833	4.027927e+000	4.015253e+000	62	36	8.327933e+000	0	0	0	0	0	0	1.07183	0	0	49.8279	37.0175
DATA	80	1	80	66	1	DarkCorner	DarkCorner	5594.67	180.179	4.036038e+000	4.021269e+000	59	35	7.458349e+000	0	0	0	0	0	0	0.321787	0	0	49.1849	35.6839
DATA	81	1	81	66	1	DarkCorner	DarkCorner	5619.5	179.648	4.042270e+000	4.030431e+000	60	36	7.774843e+000	0	0	0	0	0	0	1.2621	0	0	65	36.5591
DATA	82	1	82	66	1	DarkCorner	DarkCorner	5645	179.545	4.762276e+000	4.059787e+000	63	37	8.722099e+000	0	0	0	0	0	0	3.76375	1	0	55.8519	36.87
DATA	83	1	83	66	1	DarkCorner	DarkCorner	5670.42	179.573	4.303912e+000	4.057174e+000	63.5	36	7.869197e+000	0	0	0	0	0	0	3.39936	1	0	65	36.0706
DATA	84	1	84	260	1	GE_BrightCorner	GE_BrightCorner	5695.74	179.546	2.640887e+004	2.640890e+003	20704.5	36	8.074763e+000	0	0	0	0	0	0	20855.9	1	1	54.9904	36.8794
DATA	85	1	85	260	1	GE_BrightCorner	GE_BrightCorner	5721.19	179.506	2.588802e+004	2.588805e+003	20080	36	8.001258e+000	0	0	0	0	0	0	20452.9	1	1	50.4627	36.3681
DATA	86	2	1	260	1	GE_BrightCorner	GE_BrightCorner	3600.44	185.227	2.341989e+004	2.341992e+003	21381	40	9.154615e+000	0	0	0	0	0	0	21559.8	1	1	52.0157	40.7655
DATA	87	2	2	66	1	DarkCorner	DarkCorner	3626.33	185.5	6.088985e+000	3.499755e+000	66	42	1.029918e+001	0	0	0	0	0	0	5.62966	1	0	57.5363	43.3246
DATA	88	2	3	66	1	DarkCorner	DarkCorner	3651.5	185.5	4.095884e+000	3.456545e+000	64	43	9.432893e+000	0	0	0	0	0	0	3.80257	1	0	65	43.4335
DATA	89	2	4	66	1	DarkCorner	DarkCorner	3676.95	185.477	7.165652e+000	3.492504e+000	66.5	44	8.534553e+000	0	0	0	0	0	0	6.67972	1	0	55.8519	44.4133
DATA	90	2	5	66	1	DarkCorner	DarkCorner	3702.42	185.427	5.538265e+000	3.449350e+000	64	42	9.229498e+000	0	0	0	0	0	0	5.18332	1	0	57.5363	42.5871
DATA	91	2	6	66	1	DarkCorner	DarkCorner	3727.67	185.5	6.679348e+000	3.456684e+000	67	41	9.800925e+000	0	0	0	0	0	0	6.27535	1	0	57.5363	42.0396
DATA	92	2	7	66	1	DarkCorner	DarkCorner	3753.33	185.5	6.229422e+000	3.435679e+000	66	43	9.664302e+000	0	0	0	0	0	0	5.87482	1	0	57.5363	43.3979
DATA	93	2	8	66	1	DarkCorner	DarkCorner	3778.5	185.5	3.379204e+000	3.370125e+000	61	41	9.424970e+000	0	0	0	0	0	0	1.4444	0	0	57.5363	43.0748
DATA	94	2	9	66	1	DarkCorner	DarkCorner	3803.89	185.5	4.202388e+000	3.381232e+000	66	41	1.006451e+001	0	0	0	0	0	0	3.99119	1	0	56.9804	42.5027
DATA	95	2	10	66	1	DarkCorner	DarkCorner	3829.42	185.573	5.652303e+000	3.391297e+000	67	42	8.956320e+000	0	0	0	0	0	0	5.38614	1	0	57.5363	42.1478
DATA	96	2	11	0	0	A_44_P212746	ENSRNOT00000049707	3854.32	185.605	2.550730e+001	4.197468e+000	84	40	9.630876e+000	0	0	0	0	0	0	24.3814	1	1	49.5074	40.4
DATA	97	2	12	0	0	A_64_P103615	NM_001107179	3880.11	185.5	4.298828e+001	5.433720e+000	100	40	8.069716e+000	0	0	0	0	0	0	41.2155	1	1	65	40.4532
DATA	98	2	13	0	0	A_44_P550697	NM_001106400	3904.99	185.587	1.590745e+002	1.624905e+001	214	39	8.965467e+000	0	0	0	0	0	0	152.934	1	1	49.1849	40.3532
DATA	99	2	14	0	0	A_64_P045429	A_64_P045429	3930.52	185.44	7.439662e+001	8.140993e+000	132.5	37	8.455798e+000	0	0	0	0	0	0	71.7132	1	1	49.1849	38.285
DATA	100	2	15	0	0	A_64_P075175	ENSRNOT00000044322	3956.42	185.573	3.894641e+002	3.908576e+001	439	41	9.078165e+000	0	0	0	0	0	0	376.344	1	1	57.5363	41.0693
DATA	101	2	16	0	0	A_44_P472801	NM_173121	3981.06	185.686	1.390240e+003	1.390629e+002	1363	41	9.844273e+000	0	0	0	0	0	0	1346.3	1	1	46.8651	41.2437
DATA	102	2	17	0	0	A_42_P491486	NM_022533	4006.73	185.219	3.139858e+003	3.140029e+002	2989.5	38	8.409362e+000	0	0	0	0	0	0	3046.84	1	1	48.5334	38.6298
DATA	103	2	18	0	0	A_43_P12736	NM_033299	4032.42	185.573	6.743687e+001	7.498050e+000	127	41	9.154141e+000	0	0	0	0	0	0	65.5581	1	1	57.5363	40.493
DATA	104	2	19	0	0	A_64_P158790	A_64_P158790	4057.5	185.5	1.482633e+004	1.482636e+003	14491	39	9.408458e+000	0	0	0	0	0	0	14435.8	1	1	49.1849	40.3564
DATA	105	2	20	0	0	A_44_P229481	NM_001191077	4083.42	185.573	1.797621e+002	1.827086e+001	243.5	40	9.419860e+000	0	0	0	0	0	0	175.27	1	1	57.5363	40.039
DATA	106	2	21	0	0	A_64_P133836	ENSRNOT00000039319	4108.58	185.573	2.467191e+001	4.091873e+000	88	40	8.529178e+000	0	0	0	0	0	0	24.0823	1	1	57.5363	40.7475
DATA	107	2	22	0	0	A_43_P13137	NM_130818	4134.09	185.614	1.925058e+001	3.787220e+000	80	40.5	9.526504e+000	0	0	0	0	0	0	18.8075	1	1	65	41.8366
DATA	108	2	23	0	0	A_42_P586141	NM_017035	4158.95	185.625	1.237729e+002	1.279924e+001	183	40.5	8.386211e+000	0	0	0	0	0	0	121.003	1	1	50.1463	41.0566
DATA	109	2	24	0	0	A_44_P142850	NM_001106975	4184.58	185.573	3.560892e+001	4.826388e+000	97	41	7.520413e+000	0	0	0	0	0	0	34.8272	1	1	57.5363	40.5279
DATA	110	2	25	0	0	A_44_P1042504	NM_001044232	4209.94	185.687	9.137844e+001	9.701044e+000	149.5	39	8.356295e+000	0	0	0	0	0	0	89.3893	1	1	45.835	39.3905
DATA	111	2	26	0	0	A_42_P476474	NM_001033926	4235.48	185.916	1.539727e+003	1.540071e+002	1538	40	1.024485e+001	0	0	0	0	0	0	1506.13	1	1	49.8279	41.1937
DATA	112	2	27	0	0	A_44_P480882	ENSRNOT00000035496	4261	186	1.019396e+001	3.414190e+000	73	41	8.652818e+000	0	0	0	0	0	0	9.96854	1	0	54.9904	41.2029
DATA	113	2	28	0	0	A_44_P1042696	NM_001106377	4286.06	185.687	3.559304e+003	3.559453e+002	3397	41	9.191447e+000	0	0	0	0	0	0	3478.77	1	1	45.835	41.7636
DATA	114	2	29	0	0	A_64_P132576	NM_001012357	4311.48	185.922	3.667399e+003	3.667544e+002	3624.5	41	9.541470e+000	0	0	0	0	0	0	3581.62	1	1	49.5074	42.134
DATA	115	2	30	0	0	A_42_P652357	NM_021868	4336.63	186	1.638016e+004	1.638019e+003	15729	41	9.602343e+000	0	0	0	0	0	0	15980.9	1	1	48.5334	42.4187
DATA	116	2	31	0	0	A_64_P134935	NM_001107976	4362.5	186	1.934822e+001	3.799721e+000	79	42	9.618810e+000	0	0	0	0	0	0	18.8523	1	1	54.1152	42.0048
DATA	117	2	32	0	0	A_64_P034019	NM_001107145	4388	186	2.978733e+001	4.427144e+000	92	41	9.611678e+000	0	0	0	0	0	0	28.98	1	1	54.9904	40.9463
DATA	118	2	33	0	0	A_64_P140634	A_64_P140634	4413	185.773	2.493527e+003	2.493743e+002	2486	43	9.391359e+000	0	0	0	0	0	0	2421.79	1	1	48.2044	42.3738
DATA	120	2	35	0	0	A_42_P746029	NM_144748	4464	186	4.570257e+001	5.634002e+000	107	41	9.828063e+000	0	0	0	0	0	0	44.2009	1	1	46.8651	41.6268
DATA	121	2	36	0	0	A_64_P009032	NM_001105801	4489.35	185.914	2.444053e+004	2.444055e+003	22704	41	9.111615e+000	0	0	0	0	0	0	23579.9	1	1	49.5074	42.3894
DATA	122	2	37	0	0	A_42_P764792	NM_001014036	4514.61	186.234	2.191338e+002	2.216218e+001	271	41	1.074591e+001	0	0	0	0	0	0	210.855	1	1	49.8279	42.0711
DATA	123	2	38	0	0	A_64_P029278	NM_001108687	4540.32	186.291	3.089540e+002	3.107340e+001	357.5	39	9.268068e+000	0	0	0	0	0	0	296.412	1	1	50.7771	39.82
DATA	124	2	39	0	0	A_43_P12266	NM_022622	4565.39	186.594	4.939659e+001	5.958091e+000	109.5	37	9.667959e+000	0	0	0	0	0	0	47.2458	1	1	47.5395	38.601
DATA	125	2	40	0	0	A_44_P204710	ENSRNOT00000049315	4591.09	186.386	1.935723e+001	3.862718e+000	79	38	9.576143e+000	0	0	0	0	0	0	18.4522	1	1	57.259	39.1179
DATA	126	2	41	0	0	A_64_P163837	NM_001013149	4616.5	186.352	8.579662e+001	9.212138e+000	146	38	9.184219e+000	0	0	0	0	0	0	81.4965	1	1	57.5363	39.0603
DATA	127	2	42	0	0	A_64_P016202	XM_001080153	4641.86	186.407	3.379607e+000	3.370959e+000	62	39	8.988294e+000	0	0	0	0	0	0	1.53203	0	0	65	38.6974
DATA	128	2	43	0	0	A_64_P137168	NM_053912	4667.03	186.061	4.415456e+003	4.415586e+002	4192	37	8.090344e+000	0	0	0	0	0	0	4162.29	1	1	46.8651	37.8863
DATA	129	2	44	0	0	A_42_P830598	XM_001063895	4692.24	186.014	4.322423e+002	4.335728e+001	457.5	38	8.289544e+000	0	0	0	0	0	0	405.798	1	1	46.8651	38.1366
DATA	130	2	45	0	0	A_42_P525886	NM_001105716	4718	186.455	1.797601e+002	1.829637e+001	235	38	9.124761e+000	0	0	0	0	0	0	168.03	1	1	55.8519	38.3249
DATA	131	2	46	0	0	A_42_P836392	NM_134383	4742.93	186.217	4.216969e+003	4.217108e+002	3903	38	1.036061e+001	0	0	0	0	0	0	3924.55	1	1	46.5243	39.5279
DATA	132	2	47	0	0	A_44_P146783	NM_001001366	4768.5	186.609	3.887553e+001	5.190881e+000	101.5	37	7.903793e+000	0	0	0	0	0	0	36.0118	1	1	44.4243	37.18
DATA	133	2	48	0	0	A_44_P294675	NM_053687	4793.38	186.311	6.398391e+001	7.272063e+000	118	36	7.761794e+000	0	0	0	0	0	0	58.9937	1	1	44.0646	36.872
DATA	134	2	49	0	0	A_64_P047137	NM_001001283	4819.58	186.427	1.212040e+001	3.678913e+000	75	36	8.543950e+000	0	0	0	0	0	0	11.1185	1	0	57.5363	36.9698
DATA	135	2	50	0	0	A_44_P170396	NM_017267	4845.11	186.5	1.595917e+001	3.838687e+000	76	38	8.529999e+000	0	0	0	0	0	0	14.5658	1	0	56.9804	37.9903
DATA	136	2	51	0	0	A_64_P077603	ENSRNOT00000037503	4869.36	185.724	5.984585e+001	6.937235e+000	122	37	7.562607e+000	0	0	0	0	0	0	54.3508	1	1	42.5954	36.9167
DATA	137	2	52	0	0	A_42_P648800	AA998304	4895.5	186.295	1.701659e+002	1.737840e+001	225	36	8.551415e+000	0	0	0	0	0	0	153.705	1	1	50.4627	36.4739
DATA	138	2	53	0	0	A_64_P143186	A_64_P143186	4921.24	186.634	5.104404e+001	6.215765e+000	108	36	7.068545e+000	0	0	0	0	0	0	45.8555	1	1	47.5395	36.701
DATA	139	2	54	0	0	A_42_P622681	NM_001030020	4946.38	186.697	1.190443e+003	1.190977e+002	1057	36.5	8.007528e+000	0	0	0	1	0	0	1063.66	1	1	49.5074	36.49
DATA	140	2	55	0	0	A_42_P506076	NM_019253	4971.63	186.64	1.185846e+004	1.185852e+003	10413.5	37	8.413306e+000	0	0	0	0	0	0	10537.3	1	1	48.8603	37.8654
DATA	141	2	56	0	0	A_64_P158975	NM_001109536	4997.36	186.303	9.443749e+001	1.010892e+001	141	36	7.928386e+000	0	0	0	0	0	0	83.44	1	1	49.5074	36.2105
DATA	142	2	57	0	0	A_42_P655425	NM_001106406	5022.67	186.5	3.782947e+002	3.800292e+001	396	37	7.386934e+000	0	0	0	0	0	0	332.365	1	1	57.5363	37.8641
DATA	143	2	58	0	0	A_44_P408520	NM_031569	5047.96	186.286	7.226871e+001	8.095107e+000	124	37	8.136525e+000	0	0	0	1	0	0	63.1356	1	1	46.8651	38.029
DATA	144	2	59	0	0	A_64_P031259	NM_001002022	5073.53	186.6	1.275722e+002	1.327415e+001	170	36	7.154997e+000	0	0	0	0	0	0	110.813	1	1	49.5074	36.1421
DATA	145	2	60	0	0	A_43_P10227	NM_024397	5098.63	186.5	6.401124e+003	6.401231e+002	5545	37	7.904531e+000	0	0	0	0	0	0	5528.93	1	1	49.8279	37.1659
DATA	146	2	61	0	0	A_42_P542744	NM_001107544	5124.14	186.61	2.288151e+003	2.288452e+002	1989	37	6.846191e+000	0	0	0	1	0	0	1965.12	1	1	49.8279	36.905
DATA	147	2	62	0	0	A_64_P052387	A_64_P052387	5149.58	186.573	6.650990e+001	7.626157e+000	120.5	36	8.102877e+000	0	0	0	0	0	0	56.7972	1	1	57.5363	36.4279
DATA	149	2	64	0	0	A_64_P064823	ENSRNOT00000050238	5200.44	186.675	1.578080e+002	1.622563e+001	191	36	8.407228e+000	0	0	0	0	0	0	133.265	1	1	49.8279	36.5755
DATA	150	2	65	0	0	A_42_P730292	NM_001004244	5225.69	186.662	1.556298e+003	1.556761e+002	1350.5	36	7.317982e+000	0	0	0	0	0	0	1307.13	1	1	48.5334	35.9952
DATA	151	2	66	0	0	A_64_P052878	FM104687	5251.08	186.556	3.115727e+002	3.138987e+001	320	36	7.609071e+000	0	0	0	0	0	0	260.287	1	1	48.2044	36.9234
DATA	152	2	67	0	0	A_64_P157171	XM_001063008	5276.57	186.761	1.736530e+003	1.736953e+002	1538	35	7.885830e+000	0	0	0	0	0	0	1443.08	1	1	46.5243	36.2886
DATA	153	2	68	0	0	A_44_P693350	ENSRNOT00000030985	5302.09	186.614	8.160459e+000	3.939566e+000	68	38	8.727049e+000	0	0	0	0	0	0	6.74667	1	0	65	37.7477
DATA	154	2	69	0	0	A_64_P090168	NM_001000720	5327.5	186.648	3.285538e+001	5.079067e+000	89	36	7.641473e+000	0	0	0	0	0	0	27.029	1	1	57.5363	37.7464
DATA	155	2	70	0	0	A_42_P726392	NM_001106353	5352.91	186.935	6.579617e+002	6.591117e+001	574	36	8.412308e+000	0	0	0	0	0	0	538.711	1	1	54.4085	37.0392
DATA	156	2	71	0	0	A_64_P015727	FQ218047	5378.24	187	1.889152e+003	1.889557e+002	1547	36	7.649651e+000	0	0	0	0	0	0	1539.72	1	1	46.8651	36.194
DATA	157	2	72	0	0	A_44_P897023	NM_001008364	5403.5	187	4.063084e+002	4.082013e+001	393	37	8.646749e+000	0	0	0	0	0	0	329.723	1	1	48.5334	38.099
DATA	158	2	73	0	0	A_44_P104776	NM_001001425	5429	187	4.924335e+001	6.308282e+000	101	36	7.192899e+000	0	0	0	0	0	0	39.7968	1	1	54.9904	36.53
DATA	159	2	74	0	0	A_64_P142521	A_64_P142521	5454.45	186.932	7.073069e+000	4.020706e+000	66	36	8.189165e+000	0	0	0	0	0	0	5.69419	1	0	48.8603	36.3491
DATA	160	2	75	66	1	DarkCorner	DarkCorner	5479.86	187.371	3.986824e+000	3.972033e+000	58	36	8.020246e+000	0	0	0	0	0	0	-1.50681	0	0	46.5243	36.6332
DATA	161	2	76	66	1	DarkCorner	DarkCorner	5505.24	187.155	3.999840e+000	3.985000e+000	56	36	7.797844e+000	0	0	0	0	0	0	-3.42317	0	0	47.2035	36.433
DATA	162	2	77	66	1	DarkCorner	DarkCorner	5530.5	187	4.011492e+000	4.003378e+000	61	36	7.478207e+000	0	0	0	0	0	0	1.85534	0	0	54.1152	36.1505
DATA	163	2	78	66	1	DarkCorner	DarkCorner	5555.69	187.313	4.021617e+000	4.006697e+000	60	37	8.028007e+000	0	0	0	0	0	0	-0.0384628	0	0	45.1352	38.2632
DATA	164	2	79	66	1	DarkCorner	DarkCorner	5581.52	187.328	4.030519e+000	4.015565e+000	57.5	36	8.225596e+000	0	0	0	0	0	0	-3.79944	0	0	46.5243	37.6286
DATA	165	2	80	66	1	DarkCorner	DarkCorner	5606.25	187.515	4.037417e+000	4.022438e+000	60	36	7.134578e+000	0	0	0	0	0	0	-0.979719	0	0	45.835	36.1399
DATA	166	2	81	66	1	DarkCorner	DarkCorner	5632.5	187	4.043097e+000	4.029901e+000	58.5	38	8.974061e+000	0	0	0	0	0	0	0.953805	0	0	54.1152	38.9406
DATA	167	2	82	66	1	DarkCorner	DarkCorner	5657.54	187.653	4.046396e+000	4.038972e+000	62.5	37	8.499587e+000	0	0	0	0	0	0	1.95587	0	0	54.7002	38.1813
DATA	168	2	83	66	1	DarkCorner	DarkCorner	5683	187.455	4.047988e+000	4.032969e+000	60	36	8.207048e+000	0	0	0	0	0	0	-0.517952	0	0	65	36.8789
DATA	169	2	84	66	1	DarkCorner	DarkCorner	5708.5	187.352	4.093077e+000	4.053162e+000	63	37	8.391761e+000	0	0	0	0	0	0	3.23431	1	0	57.5363	38.1809
DATA	170	2	85	260	1	GE_BrightCorner	GE_BrightCorner	5733.93	187.356	2.362432e+004	2.362436e+003	18473	36	8.596330e+000	0	0	0	0	0	0	18680.5	1	1	53.5237	37.3321
DATA	171	3	1	66	1	DarkCorner	DarkCorner	3588.11	192.5	4.441888e+000	3.496332e+000	64.5	38	7.860935e+000	0	0	0	0	0	0	4.08121	1	0	56.9804	38.3995
DATA	172	3	2	66	1	DarkCorner	DarkCorner	3613.5	192.5	3.466175e+000	3.454721e+000	60.5	42.5	8.171746e+000	0	0	0	0	0	0	0.90945	0	0	57.5363	43.4259
DATA	173	3	3	66	1	DarkCorner	DarkCorner	3638.52	192.418	4.528114e+000	3.468815e+000	65	44	1.091091e+001	0	0	0	0	0	0	4.19536	1	0	52.9257	44.625
DATA	174	3	4	66	1	DarkCorner	DarkCorner	3664.42	192.573	4.491477e+000	3.454104e+000	65.5	45	9.454765e+000	0	0	0	0	0	0	4.17886	1	0	57.5363	46.6119
DATA	175	3	5	66	1	DarkCorner	DarkCorner	3689.58	192.573	9.744704e+000	3.547665e+000	70	44	8.936250e+000	0	0	0	0	0	0	9.10251	1	0	65	44.4048
DATA	176	3	6	66	1	DarkCorner	DarkCorner	3715	192.545	1.333426e+001	3.650177e+000	71	43	9.104019e+000	0	0	0	1	0	0	12.5043	1	0	55.8519	43.0377
DATA	177	3	7	66	1	DarkCorner	DarkCorner	3740.5	192.648	3.804045e+000	3.406314e+000	65	45	9.146654e+000	0	0	0	0	0	0	3.58086	1	0	57.5363	45.4727
DATA	178	3	8	66	1	DarkCorner	DarkCorner	3765.58	192.573	3.385346e+000	3.377690e+000	63	42	1.064747e+001	0	0	0	0	0	0	1.71881	0	0	65	44.6981
DATA	179	3	9	66	1	DarkCorner	DarkCorner	3790.9	192.181	3.373464e+000	3.370940e+000	65	42	9.648062e+000	0	0	0	0	0	0	2.45878	0	0	46.8651	44.2923
DATA	180	3	10	66	1	DarkCorner	DarkCorner	3816.5	192.648	3.361996e+000	3.355110e+000	60	45	8.307955e+000	0	0	0	0	0	0	1.84122	0	0	65	45.2449
DATA	181	3	11	0	0	A_64_P269465	ENSRNOT00000055742	3842.09	192.614	1.271617e+001	3.572635e+000	74	42	8.055324e+000	0	0	0	0	0	0	12.1362	1	0	57.259	42.6415
DATA	182	3	12	0	0	A_64_P140776	NM_001114502	3867	192.729	2.913195e+003	2.913385e+002	2754	42	8.673418e+000	0	0	0	0	0	0	2788.68	1	1	46.8651	43.4032
DATA	183	3	13	0	0	A_42_P662683	NM_001108855	3892.35	192.88	7.423399e+003	7.423473e+002	7082	41	7.754104e+000	0	0	0	0	0	0	7126.59	1	1	48.8603	42.58
DATA	184	3	14	0	0	A_44_P308687	NM_181389	3917.87	193.188	9.184234e+001	9.762532e+000	151	41	7.261572e+000	0	0	0	0	0	0	88.4097	1	1	46.5243	40.7391
DATA	185	3	15	0	0	A_42_P705255	NM_078622	3943.5	193	8.298436e+001	8.931153e+000	144	41	9.199776e+000	0	0	0	0	0	0	80.0856	1	1	54.1152	41.678
DATA	186	3	16	0	0	A_44_P142472	NM_001106072	3968.5	193	4.635243e+003	4.635360e+002	4479	42.5	1.389422e+001	0	0	0	0	0	0	4483.53	1	1	48.5334	46.8696
DATA	187	3	17	0	0	A_64_P015946	NM_001009720	3994.17	193	6.142911e+002	6.151700e+001	638	42	8.939513e+000	0	0	0	0	0	0	595.456	1	1	46.8651	42.5
DATA	188	3	18	0	0	A_64_P118698	ENSRNOT00000050943	4019.5	193	4.459781e+001	5.536639e+000	105	40	9.404268e+000	0	0	0	0	0	0	43.3124	1	1	54.1152	40.5556
DATA	189	3	19	0	0	A_42_P705302	NM_001107361	4045.09	193.104	4.622897e+003	4.623013e+002	4474	42	1.180764e+001	0	0	0	0	0	0	4497.29	1	1	46.8651	44.9565
DATA	190	3	20	0	0	A_64_P097547	NM_001100528	4070.5	193	3.822063e+001	5.030400e+000	98	43	1.228395e+001	0	0	0	0	0	0	37.2368	1	1	54.1152	43.4561
DATA	191	3	21	0	0	A_42_P815485	NM_001013908	4095.5	193	4.364104e+003	4.364227e+002	4191.5	43	8.777005e+000	0	0	0	0	0	0	4256.98	1	1	48.5334	44.5577
DATA	192	3	22	0	0	A_42_P526728	ENSRNOT00000060758	4120.86	193.183	8.093707e+002	8.100283e+001	828	43	1.412619e+001	0	0	0	0	0	0	790.304	1	1	46.8651	47.9375
DATA	193	3	23	0	0	A_42_P692317	NM_001107565	4146.41	193.155	4.858190e+002	4.869120e+001	527	42	1.163829e+001	0	0	0	0	0	0	474.749	1	1	47.5395	45.1957
DATA	194	3	24	0	0	A_44_P383949	NM_175593	4172.39	193.069	2.907110e+001	4.367096e+000	91	42	9.668424e+000	0	0	0	0	0	0	28.4246	1	1	53.8203	42.6275
DATA	195	3	25	0	0	A_42_P589570	NM_001014105	4197.5	193.352	1.702753e+002	1.733639e+001	228	40	8.383497e+000	0	0	0	0	0	0	166.539	1	1	57.5363	41.2075
DATA	196	3	26	0	0	A_64_P012384	NM_001039338	4222.91	193.386	9.807747e+001	1.033462e+001	159.5	39.5	9.352437e+000	0	0	0	0	0	0	95.9321	1	1	57.259	40.75
DATA	197	3	27	0	0	A_64_P088612	NM_053871	4247.71	192.879	2.129890e+003	2.130139e+002	2150.5	42	9.439927e+000	0	0	0	0	0	0	2082.97	1	1	45.835	43.3051
DATA	198	3	28	0	0	A_42_P668072	NM_013130	4273.58	193.427	2.194599e+002	2.218673e+001	277	43	9.726656e+000	0	0	0	0	0	0	214.535	1	1	57.5363	42.5
DATA	199	3	29	0	0	A_44_P624451	NM_001134605	4299.09	193.386	5.058656e+001	6.019026e+000	115.5	40.5	7.927452e+000	0	0	0	0	0	0	49.4188	1	1	57.259	41.18
DATA	200	3	30	0	0	A_64_P118502	A_64_P118502	4324.17	193.471	1.938294e+002	1.965594e+001	250	43	8.771717e+000	0	0	0	0	0	0	189.187	1	1	47.5395	44.1224
DATA	201	3	31	0	0	A_43_P15761	NM_031608	4349.58	193.427	1.153542e+002	1.198948e+001	176	42	1.213107e+001	0	0	0	0	0	0	112.464	1	1	57.5363	44.5745
DATA	202	3	32	0	0	A_42_P667696	NM_001191800	4375.42	193.427	1.169690e+003	1.170147e+002	1200.5	44	8.616991e+000	0	0	0	0	0	0	1138.78	1	1	57.5363	42.4528
DATA	203	3	33	0	0	A_44_P899121	NM_001079941	4400.17	192.677	1.964149e+003	1.964423e+002	1933	44.5	9.407627e+000	0	0	0	0	0	0	1909.24	1	1	45.4864	43.6129
DATA	204	3	34	0	0	A_42_P642757	NM_031235	4425.87	193.243	2.469948e+003	2.470167e+002	2378.5	42	8.147978e+000	0	0	0	0	0	0	2396.39	1	1	46.5243	42.0167
DATA	205	3	35	0	0	A_64_P066694	NM_001033898	4451.07	192.896	3.571998e+001	4.856950e+000	97	40	7.491011e+000	0	0	0	0	0	0	34.5845	1	1	46.8651	40.9138
DATA	206	3	36	0	0	A_42_P699201	TC594545	4476.67	193.5	2.239600e+001	3.987165e+000	84	44	9.973690e+000	0	0	0	0	0	0	21.6333	1	1	65	45.6735
DATA	207	3	37	0	0	A_42_P591944	NM_172093	4502.42	193.427	8.581356e+001	9.196620e+000	143.5	41	9.467799e+000	0	0	0	0	0	0	82.677	1	1	57.5363	42.7234
DATA	208	3	38	0	0	A_44_P115293	NM_001108294	4527.5	193.5	7.333331e+001	8.048358e+000	134.5	41	9.370333e+000	0	0	0	0	0	0	70.4593	1	1	57.5363	43.2745
DATA	209	3	39	1028	1	(+)E1A_r60_a107	E1A_r60_a107	4553	193.455	8.228058e+000	3.426618e+000	70.5	41	1.033062e+001	0	0	0	0	0	0	7.88185	1	0	55.8519	41.4583
DATA	210	3	40	0	0	A_44_P194531	NM_001007742	4578.5	193.5	1.554502e+002	1.589918e+001	203.5	40.5	1.033804e+001	0	0	0	0	0	0	148.43	1	1	57.5363	40.32
DATA	211	3	41	0	0	A_43_P20016	NM_001107377	4603.43	192.806	7.229009e+001	7.966803e+000	130	44	1.000044e+001	0	0	0	0	0	0	68.7939	1	1	46.5243	43.6949
DATA	212	3	42	0	0	A_64_P105550	A_64_P105550	4628.9	193.672	1.217058e+002	1.262601e+001	172.5	43	1.169402e+001	0	0	0	0	0	0	115.4	1	1	43.7019	42.7143
DATA	213	3	43	0	0	A_42_P791872	NM_001135174	4654.13	193.377	3.957671e+003	3.957815e+002	3618	42	9.644307e+000	0	0	0	0	0	0	3738.4	1	1	46.8651	43.26
DATA	214	3	44	0	0	A_42_P499273	NM_001012148	4679.58	193.395	1.028530e+003	1.029088e+002	979	43.5	1.239436e+001	0	0	0	0	0	0	967.649	1	1	49.5074	44.5517
DATA	215	3	45	0	0	A_64_P021960	NM_001109493	4705.38	193.224	2.015441e+002	2.043941e+001	255	40	7.513084e+000	0	0	0	0	0	0	188.808	1	1	49.5074	40.3393
DATA	216	3	46	0	0	A_64_P083725	A_64_P083725	4730.58	193.573	6.614146e+004	6.614146e+003	61578.5	47	1.351266e+001	0	0	0	0	0	0	61693.9	1	1	57.5363	48.1277
DATA	217	3	47	0	0	A_42_P524536	NM_012698	4755.92	193.526	1.456309e+002	1.496193e+001	198	40	7.750616e+000	0	0	0	0	0	0	135.225	1	1	49.1849	40.2281
DATA	218	3	48	0	0	A_64_P151675	NM_175755	4781.58	193.573	4.459938e+001	5.637297e+000	105	36.5	7.236237e+000	0	0	0	0	0	0	41.2167	1	1	57.5363	37.0962
DATA	219	3	49	0	0	A_64_P146914	A_64_P146914	4806.87	193.243	2.065344e+003	2.065635e+002	1931.5	37	8.641689e+000	0	0	0	0	0	0	1899.51	1	1	46.5243	38.2424
DATA	220	3	50	0	0	A_64_P115065	NM_001109631	4832.42	193.573	5.636689e+000	3.527286e+000	66	38	6.060751e+000	0	0	0	0	0	0	5.15824	1	0	65	37.7222
DATA	221	3	51	0	0	A_42_P468771	NM_001107362	4857.37	193.64	2.054356e+003	2.054654e+002	1857.5	42	8.375728e+000	0	0	0	0	0	0	1870.58	1	1	48.8603	41.1163
DATA	222	3	52	0	0	A_44_P226461	NM_053798	4882.74	193.729	7.795083e+002	7.803016e+001	743	40	7.262428e+000	0	0	0	0	0	0	706.085	1	1	46.8651	40.3571
DATA	223	3	53	0	0	A_64_P009440	NM_001109313	4908.21	193.629	1.348858e+001	3.785084e+000	74	38	8.063164e+000	0	0	0	0	0	0	12.153	1	0	47.2035	39.0508
DATA	224	3	54	0	0	A_44_P282433	NM_033230	4933.91	193.614	3.215797e+002	3.235398e+001	339.5	43	7.169056e+000	0	0	0	0	0	0	288.154	1	1	57.259	42.5439
DATA	225	3	55	0	0	A_42_P461003	NM_001044283	4959.06	194.175	6.814829e+003	6.814923e+002	6203	39.5	8.883027e+000	0	0	0	0	0	0	6073.41	1	1	45.4864	40.3
DATA	226	3	56	0	1	ETG10_236652	ETG10_236652	4984.58	193.573	9.738774e+000	3.725048e+000	70.5	38	8.524829e+000	0	0	0	0	0	0	8.63072	1	0	65	38.5517
DATA	227	3	57	0	0	A_42_P529780	NM_138855	5009.89	193.423	3.404663e+002	3.423808e+001	367	38	6.251689e+000	0	0	0	0	0	0	300.043	1	1	47.8731	38.0333
DATA	228	3	58	0	0	A_42_P492976	NM_001126099	5035.08	193.901	2.609633e+002	2.634842e+001	288.5	38	7.725426e+000	0	0	0	0	0	0	228.695	1	1	46.8651	38.75
DATA	229	3	59	0	0	A_42_P533865	NM_001127650	5060.59	194.085	2.013744e+001	4.174586e+000	81	40	1.109015e+001	0	0	0	0	0	0	17.5471	1	1	48.2044	39.78
DATA	230	3	60	0	0	A_64_P026399	NM_001007626	5085.72	194.099	4.461218e+002	4.476349e+001	445	39	1.015847e+001	0	0	0	0	0	0	386.554	1	1	47.2035	39.1887
DATA	231	3	61	0	0	A_64_P152543	XM_221353	5111.56	193.972	7.592464e+003	7.592554e+002	6718	42	7.884211e+000	0	0	0	0	0	0	6540.7	1	1	48.2044	40.8627
DATA	232	3	62	0	0	A_44_P203195	NM_053585	5136.72	193.905	1.029483e+003	1.030155e+002	924.5	41	7.362917e+000	0	0	0	0	0	0	881.907	1	1	48.8603	40.549
DATA	233	3	63	0	0	A_42_P490612	NM_001108262	5162.17	194	3.633617e+003	3.633810e+002	3028	40	8.329685e+000	0	0	0	0	0	0	3095.24	1	1	46.8651	40.1111
DATA	234	3	64	0	0	A_44_P457548	NM_001103351	5187.37	193.93	1.046992e+002	1.112507e+001	154	36	6.502224e+000	0	0	0	0	0	0	88.6944	1	1	47.5395	37.6327
DATA	235	3	65	0	0	A_42_P755665	NM_001013154	5213	193.797	7.284737e+002	7.294550e+001	661	40.5	7.139428e+000	0	0	0	0	0	0	613.696	1	1	46.8651	39.7857
DATA	236	3	66	0	0	A_42_P781999	NM_001106378	5238.38	194	1.088181e+004	1.088187e+003	8995	37.5	7.298756e+000	0	0	0	0	0	0	9117.94	1	1	48.5334	38.44
DATA	237	3	67	0	0	A_44_P100289	ENSRNOT00000049514	5264.14	193.789	6.239128e+001	7.317427e+000	115	39	8.762005e+000	0	0	0	0	0	0	51.9972	1	1	47.2035	39.25
DATA	238	3	68	0	0	A_42_P629599	ENSRNOT00000023101	5289.15	193.917	2.177365e+002	2.211017e+001	236.5	42	1.125121e+001	0	0	0	0	0	0	180.542	1	1	46.8651	41.1923
DATA	239	3	69	0	0	A_44_P192083	NM_001047088	5314.61	194.069	3.516690e+001	5.223403e+000	90	38	8.850612e+000	0	0	0	0	0	0	29.0133	1	1	53.8203	40
DATA	240	3	70	0	0	A_42_P498066	NM_031136	5340.42	194.427	5.168142e+004	5.168144e+003	41488	39	7.523385e+000	0	0	0	0	0	0	42428.9	1	1	57.5363	39.7593
DATA	241	3	71	0	0	A_42_P519910	NM_001106292	5365.38	194.237	1.022162e+004	1.022169e+003	8262	37.5	7.876625e+000	0	0	0	0	0	0	8353.14	1	1	49.1849	37.86
DATA	242	3	72	0	0	A_42_P657538	NM_001008362	5390.81	194.385	1.318442e+003	1.319024e+002	1121	42	6.488271e+000	0	0	0	0	0	0	1072.64	1	1	50.1463	40.5192
DATA	243	3	73	0	0	A_64_P030630	NM_001109610	5416.47	194.173	2.268007e+003	2.268348e+002	1881	40	6.743363e+000	0	0	0	0	0	0	1837.29	1	1	51.0895	40.3529
DATA	244	3	74	0	0	A_44_P126366	NM_001017456	5441.58	194.427	2.853668e+001	4.872026e+000	83	36	6.819735e+000	0	0	0	0	0	0	23.0269	1	1	57.5363	36.7234
DATA	245	3	75	0	0	A_43_P15627	ENSRNOT00000067029	5467.42	194.427	2.425114e+001	4.646740e+000	82	36	6.609085e+000	0	0	0	0	0	0	19.4953	1	1	57.5363	36.56
DATA	246	3	76	0	0	A_42_P754784	CB328432	5492.38	194	3.848328e+003	3.848533e+002	3048	34.5	6.454740e+000	0	0	0	0	0	0	3083.25	1	1	48.5334	35.36
DATA	247	3	77	66	1	DarkCorner	DarkCorner	5517.79	194.071	4.004200e+000	3.989662e+000	60.5	39	9.788993e+000	0	0	0	0	0	0	0.402288	0	0	36.1258	39.5849
DATA	248	3	78	66	1	DarkCorner	DarkCorner	5543.13	194.357	4.015083e+000	4.007662e+000	63	38.5	8.102870e+000	0	0	0	0	0	0	1.94897	0	0	51.7088	38.7333
DATA	249	3	79	66	1	DarkCorner	DarkCorner	5569.1	194.577	4.024740e+000	4.012005e+000	64.5	41	7.868246e+000	0	0	0	0	0	0	1.05479	0	0	50.1463	41.2264
DATA	250	3	80	66	1	DarkCorner	DarkCorner	5594.65	194.634	4.032670e+000	4.017709e+000	56	39	9.325692e+000	0	0	0	0	0	0	-6.0672	0	0	53.5237	40.102
DATA	251	3	81	66	1	DarkCorner	DarkCorner	5619.47	194.6	4.038763e+000	4.023779e+000	55	40	8.407577e+000	0	0	0	0	0	0	-4.29887	0	0	49.5074	40.92
DATA	252	3	82	66	1	DarkCorner	DarkCorner	5644.89	194.5	4.043240e+000	4.033968e+000	64	39.5	8.146368e+000	0	0	0	0	0	0	1.69996	0	0	56.9804	40.4821
DATA	253	3	83	66	1	DarkCorner	DarkCorner	5670.5	194.371	4.045818e+000	4.032027e+000	59	39	8.624146e+000	0	0	0	0	0	0	0.783598	0	0	44.4243	40.4167
DATA	254	3	84	66	1	DarkCorner	DarkCorner	5695.58	194.427	4.788673e+000	4.059634e+000	64.5	38	9.030550e+000	0	0	0	0	0	0	3.78505	1	0	57.5363	39.4909
DATA	255	3	85	66	1	DarkCorner	DarkCorner	5721.11	194.5	6.882869e+000	4.088007e+000	65	41	9.661283e+000	0	0	0	0	0	0	5.44256	1	0	65	41.4154
DATA	256	4	1	66	1	DarkCorner	DarkCorner	3600.3	200.281	3.473231e+000	3.461564e+000	61	40.5	8.241260e+000	0	0	0	0	0	0	0.845712	0	0	45.1352	41.2
DATA	257	4	2	66	1	DarkCorner	DarkCorner	3626.45	199.866	3.458317e+000	3.445486e+000	60	46	1.252991e+001	0	0	0	0	0	0	-0.369573	0	0	46.1809	48.9643
DATA	258	4	3	66	1	DarkCorner	DarkCorner	3651.26	199.971	3.444429e+000	3.440862e+000	60	44	1.101247e+001	0	0	0	0	0	0	2.33638	0	0	46.1809	46.0244
DATA	259	4	4	66	1	DarkCorner	DarkCorner	3677.77	199.909	3.429966e+000	3.417241e+000	58	43.5	8.242120e+000	0	0	0	0	0	0	-2.50504	0	0	65	45.3056
DATA	260	4	5	66	1	DarkCorner	DarkCorner	3702.57	199.765	5.073308e+000	3.441740e+000	65	43	8.108637e+000	0	0	0	0	0	0	4.7488	1	0	46.8651	41.6
DATA	261	4	6	66	1	DarkCorner	DarkCorner	3727.5	200	6.473804e+000	3.452607e+000	66	47	1.135545e+001	0	0	0	0	0	0	6.08254	1	0	54.1152	50.2903
DATA	262	4	7	66	1	DarkCorner	DarkCorner	3753.37	200.404	3.391161e+000	3.385713e+000	63	46	1.061668e+001	0	0	0	0	0	0	2.0718	0	0	57.8122	49.1
DATA	263	4	8	66	1	DarkCorner	DarkCorner	3778.5	200.352	4.607909e+000	3.398031e+000	65	43	1.093043e+001	0	0	0	0	0	0	4.36121	1	0	65	45.9756
DATA	264	4	9	66	1	DarkCorner	DarkCorner	3804.17	199.75	3.367466e+000	3.356842e+000	61	44.5	9.705014e+000	0	0	0	0	0	0	1.06391	0	0	40.6843	44.6111
DATA	265	4	10	0	0	A_44_P807031	NM_001108921	3828.91	199.672	2.972929e+003	2.973117e+002	2932.5	47	6.633250e+000	0	0	0	0	0	0	2832.61	1	1	45.1352	47
DATA	266	4	11	0	0	A_64_P025813	NM_001009379	3854.58	200.427	3.346108e+000	3.334667e+000	61.5	41	7.335219e+000	0	0	0	0	0	0	0.77027	0	0	57.5363	40.4688
DATA	267	4	12	0	0	A_64_P130551	XM_001081846	3880.09	200.386	7.547218e+000	3.408413e+000	69	40.5	9.501290e+000	0	0	0	0	0	0	7.23523	1	0	65	43.2941
DATA	268	4	13	0	0	A_42_P715449	NM_001033709	3905.5	200.352	7.992077e+002	7.998948e+001	830	41.5	9.567906e+000	0	0	0	0	0	0	768.304	1	1	57.5363	44.8
DATA	269	4	14	0	0	A_42_P727584	NM_031622	3930.54	200.287	1.879351e+003	1.879641e+002	1863	42	7.646042e+000	0	0	0	0	0	0	1811.31	1	1	50.7771	43.125
DATA	270	4	15	0	0	A_42_P600642	NM_001008386	3956.42	200.427	1.759443e+002	1.790086e+001	232	43	1.104993e+001	0	0	0	0	0	0	169.991	1	1	65	45.3793
DATA	271	4	16	0	0	A_42_P669103	NM_001108329	3981.58	200.427	4.221206e+002	4.234013e+001	456	42.5	1.138809e+001	0	0	0	0	0	0	408.728	1	1	57.5363	44.3667
DATA	272	4	17	0	0	A_44_P715330	NM_001024966	4007.11	200.5	2.904999e+002	2.923505e+001	340	42	8.474389e+000	0	0	0	0	0	0	281.849	1	1	56.9804	43.3793
DATA	273	4	18	0	0	A_64_P083185	NM_001107199	4032.5	200.5	4.083310e+002	4.096449e+001	464	42.5	9.147990e+000	0	0	0	0	0	0	396.881	1	1	57.5363	44.1667
DATA	274	4	19	0	0	A_64_P037313	ENSRNOT00000030164	4057.67	200.5	3.201038e+001	4.578279e+000	91	42	1.518069e+001	0	0	0	0	0	0	31.1613	1	1	57.5363	46.1034
DATA	275	4	20	0	0	A_44_P321009	NM_012540	4083.33	200.5	5.481153e+000	3.314391e+000	66	37.5	1.058669e+001	0	0	0	0	0	0	5.34306	1	0	65	41.1786
DATA	276	4	21	0	0	A_42_P700753	FQ212883	4108.44	200.479	9.097101e+002	9.102959e+001	955	42	9.219544e+000	0	0	0	0	0	0	887.779	1	1	48.2044	42.6
DATA	277	4	22	0	0	A_44_P775974	NM_001024363	4134.11	200.5	1.068049e+001	3.432547e+000	72	47	1.597803e+001	0	0	0	0	0	0	10.4325	1	0	56.9804	50.8788
DATA	278	4	23	0	0	A_44_P503868	A_44_P503868	4159	200.644	2.318729e+003	2.318958e+002	2339	47.5	1.838575e+001	0	0	0	0	0	0	2266.36	1	1	49.1849	53.5357
DATA	279	4	24	0	0	A_64_P122541	A_64_P122541	4184.67	200.5	7.196100e+001	7.899515e+000	130	44	1.469789e+001	0	0	0	0	0	0	70.3666	1	1	57.5363	48.8065
DATA	280	4	25	0	0	A_64_P080967	NM_001033890	4209.81	200.467	6.032715e+003	6.032803e+002	5870.5	45.5	1.008032e+001	0	0	0	0	0	0	5900.19	1	1	49.5074	44.25
DATA	281	4	26	0	0	A_44_P1056309	NM_001105912	4235.5	200.5	2.154882e+001	3.906262e+000	82	42.5	8.099478e+000	0	0	0	0	0	0	21.0745	1	1	57.5363	43.1923
DATA	282	4	27	0	0	A_44_P199514	NM_001005564	4261	200.545	7.815707e+002	7.822499e+001	824	45.5	9.312008e+000	0	0	0	0	0	0	764.145	1	1	55.8519	46.5278
DATA	283	4	28	0	0	A_64_P097952	NM_001134962	4286.42	200.573	3.146627e+001	4.531451e+000	94	45	8.079993e+000	0	0	0	0	0	0	30.7484	1	1	57.5363	43.5625
DATA	284	4	29	0	0	A_42_P813939	NM_001108741	4311.63	200.64	1.222674e+003	1.223110e+002	1227	46	6.464555e+000	0	0	0	0	0	0	1193.86	1	1	48.8603	44.7619
DATA	285	4	30	0	0	A_64_P006423	NM_012584	4337.33	200.5	2.521489e+002	2.542561e+001	311.5	46	1.008766e+001	0	0	0	0	0	0	245.956	1	1	57.5363	46.25
DATA	286	4	31	0	0	A_42_P670614	NM_001107097	4362.14	200.716	2.958779e+003	2.958960e+002	2854.5	47.5	1.218524e+001	0	0	0	0	0	0	2882.57	1	1	48.5334	50.4643
DATA	287	4	32	0	0	A_64_P084088	NM_001011954	4387.44	200.79	3.360463e+002	3.376389e+001	373	46	7.584873e+000	0	0	0	0	0	0	326.905	1	1	51.0895	46.303
DATA	288	4	33	0	0	A_64_P025643	XM_001073566	4413.19	200.533	2.923136e+002	2.941495e+001	342	45	9.177338e+000	0	0	0	0	0	0	283.865	1	1	49.5074	45.2
DATA	289	4	34	0	0	A_42_P719607	NM_153721	4438.58	200.573	2.836254e+001	4.342034e+000	90.5	45	8.674747e+000	0	0	0	0	0	0	27.4887	1	1	57.5363	44.4138
DATA	290	4	35	0	0	A_42_P843603	NM_052800	4463.77	200.589	1.935585e+002	1.963428e+001	252.5	45	1.140373e+001	0	0	0	0	0	0	187.187	1	1	48.5334	46.3871
DATA	291	4	36	0	0	A_44_P234129	NM_001135802	4489.24	200.527	8.405695e+001	9.031326e+000	143	43.5	8.107680e+000	0	0	0	0	0	0	81.0922	1	1	48.8603	44.3
DATA	292	4	37	0	0	A_42_P701161	NM_001033666	4514.5	200.711	4.212131e+003	4.212261e+002	4027.5	40	7.969309e+000	0	0	0	0	0	0	4052.86	1	1	49.1849	42.6522
DATA	293	4	38	0	0	A_44_P1017335	NM_001108607	4539.75	200.974	4.226918e+003	4.227049e+002	3951	46	7.166357e+000	0	0	0	0	0	0	4055.48	1	1	49.1849	44.76
DATA	294	4	39	0	0	A_44_P900209	CV121387	4565.58	200.573	3.806032e+001	5.058179e+000	94	42	1.345500e+001	0	0	0	0	0	0	36.402	1	1	57.5363	46.037
DATA	295	4	40	0	0	A_64_P037517	ENSRNOT00000014921	4590.33	201.234	1.455641e+001	3.645520e+000	76	46.5	1.136418e+001	0	0	0	0	0	0	13.8775	1	0	45.1352	44.2308
DATA	296	4	41	0	0	A_64_P128528	NM_001106013	4616.29	200.754	9.404752e+002	9.410731e+001	967	45	1.269324e+001	0	0	0	0	0	0	893.397	1	1	45.1352	45.2414
DATA	297	4	42	0	0	A_64_P378865	NM_001000706	4641.64	200.806	7.211323e+001	7.958533e+000	130	41	9.233717e+000	0	0	0	0	0	0	68.2501	1	1	45.835	42.3077
DATA	298	4	43	0	0	A_42_P553960	NM_001107831	4667.08	200.901	3.648356e+003	3.648512e+002	3354	44	8.279264e+000	0	0	0	0	0	0	3439.44	1	1	46.8651	42.5714
DATA	299	4	44	0	0	A_42_P717654	XM_001063683	4692.3	200.971	2.177436e+003	2.177700e+002	2041	41	8.516448e+000	0	0	0	0	0	0	2044.43	1	1	46.1809	42.4333
DATA	300	4	45	0	0	A_44_P295118	NM_001107228	4718	201	1.680358e+002	1.714577e+001	218	44	1.190346e+001	0	0	0	0	0	0	157.091	1	1	54.9904	46.3226
DATA	301	4	46	0	0	A_64_P049057	ENSRNOT00000014519	4743.05	201.09	5.212147e+002	5.223377e+001	544	48	1.197733e+001	0	0	0	0	0	0	485.139	1	1	48.2044	47.6486
DATA	302	4	47	0	0	A_42_P810287	NM_001004107	4768.7	201.1	6.950942e+002	6.959446e+001	707	38	7.509728e+000	0	0	0	0	0	0	643.985	1	1	47.2035	40.6296
DATA	303	4	48	0	0	A_42_P702729	NM_001107557	4793.8	201	9.260140e+002	9.266585e+001	930.5	39	6.025157e+000	0	0	0	0	0	0	853.903	1	1	49.1849	38.8571
DATA	304	4	49	0	0	A_42_P811084	NM_173147	4819.38	201	1.126278e+003	1.126813e+002	1075	38	7.602083e+000	0	0	0	0	0	0	1033.47	1	1	48.5334	39.6667
DATA	305	4	50	0	0	A_64_P151473	A_64_P151473	4844.92	200.985	1.049011e+004	1.049017e+003	9679	38	6.993233e+000	0	0	0	0	0	0	9577.09	1	1	46.8651	37.9697
DATA	306	4	51	0	0	A_44_P134634	ENSRNOT00000000260	4870.33	200.913	8.020874e+001	8.754539e+000	139	41	7.100020e+000	0	0	0	0	0	0	72.8512	1	1	46.5243	40.9063
DATA	307	4	52	0	0	A_44_P178479	NM_001135039	4895.58	201.427	4.321338e+002	4.335704e+001	445.5	40	7.612529e+000	0	0	0	0	0	0	390.452	1	1	57.5363	40.7188
DATA	308	4	53	0	0	A_64_P317400	ENSRNOT00000068382	4921.3	201.493	1.060614e+001	3.700971e+000	73	45	7.421942e+000	0	0	0	0	0	0	9.53127	1	0	46.5243	42.0909
DATA	309	4	54	0	0	A_42_P781735	NM_053319	4946.5	201.352	5.265311e+004	5.265312e+003	46489.5	44	8.516617e+000	0	0	0	0	0	0	47061.9	1	1	57.5363	43.0741
DATA	310	4	55	0	0	A_64_P144869	NM_017131	4972	201.455	1.603004e+002	1.642598e+001	207	42	9.671858e+000	0	0	0	0	0	0	142.487	1	1	55.8519	43.2
DATA	311	4	56	0	0	A_44_P445484	ENSRNOT00000049980	4997.15	201.164	6.990553e+002	6.999840e+001	679	37	5.766755e+000	0	0	0	0	0	0	617.943	1	1	47.5395	36.5429
DATA	312	4	57	0	0	A_42_P487832	NM_001108389	5021.53	200.623	9.317193e+002	9.324239e+001	861	40	6.875884e+000	0	0	0	0	0	0	819.161	1	1	40.6843	40
DATA	313	4	58	0	0	A_42_P482829	NM_001108138	5048	200.774	4.391807e+002	4.406912e+001	444	41	7.991644e+000	0	0	0	0	0	0	383.856	1	1	45.4864	41.5405
DATA	314	4	59	0	0	A_64_P101440	XM_001065775	5073.58	201.427	3.680130e+000	3.673369e+000	64	44	1.032179e+001	0	0	0	0	0	0	1.95474	0	0	57.5363	42.9063
DATA	315	4	60	0	0	A_64_P072268	NM_001002277	5099	201.455	5.879800e+002	5.891351e+001	577	39	9.395485e+000	0	0	0	0	0	0	508.097	1	1	55.8519	40.1429
DATA	316	4	61	0	0	A_42_P589190	NM_023104	5124.42	201.427	5.036411e+002	5.050044e+001	481.5	42	8.695622e+000	0	0	0	0	0	0	432.755	1	1	57.5363	42.4231
DATA	317	4	62	0	0	A_64_P027328	A_64_P027328	5149.58	201.427	3.476743e+002	3.496684e+001	363	40	6.264491e+000	0	0	0	0	0	0	297.077	1	1	57.5363	40.3793
DATA	318	4	63	0	0	A_42_P788541	NM_001106794	5175	201.343	2.742243e+003	2.742500e+002	2388	43.5	1.158204e+001	0	0	0	0	0	0	2330.08	1	1	45.4864	44.8333
DATA	319	4	64	0	0	A_42_P457003	NM_012802	5200.25	201.5	2.967534e+003	2.967773e+002	2507	44	8.902473e+000	0	0	0	0	0	0	2507.71	1	1	48.5334	43.1875
DATA	320	4	65	0	0	A_64_P095695	A_64_P095695	5225.89	201.5	7.820472e+001	8.691086e+000	131	43	5.942738e+000	0	0	0	0	0	0	65.7244	1	1	56.9804	41.871
DATA	321	4	66	0	0	A_42_P463880	NM_001013927	5251.25	200.803	6.094910e+001	7.188765e+000	113	41	6.413796e+000	0	0	0	0	0	0	50.9482	1	1	44.4243	41.0333
DATA	322	4	67	0	0	A_43_P20354	NM_001134574	5276.73	201.329	8.654093e+001	9.464472e+000	136.5	43	1.078809e+001	0	0	0	0	0	0	71.9641	1	1	47.2035	44.871
DATA	323	4	68	0	0	A_64_P055958	ENSRNOT00000056114	5302.11	201.5	2.675455e+001	4.689438e+000	83.5	43	1.149041e+001	0	0	0	0	0	0	22.1354	1	1	56.9804	44.6207
DATA	324	4	69	0	0	A_64_P159044	ENSRNOT00000040690	5327.34	201.701	7.519031e+002	7.528985e+001	690.5	38	8.621488e+000	0	0	0	0	0	0	619.052	1	1	46.1809	39.4828
DATA	325	4	70	0	0	A_44_P473234	ENSRNOT00000024858	5352.67	201.5	2.829594e+002	2.856190e+001	290	45	9.263525e+000	0	0	0	0	0	0	231.86	1	1	65	44.2903
DATA	326	4	71	0	0	A_42_P797965	NM_001108497	5378.01	201.437	3.627067e+002	3.648042e+001	353	40.5	7.604911e+000	0	0	0	0	0	0	295.855	1	1	48.2044	41.1875
DATA	327	4	72	0	0	A_42_P592157	NM_001002828	5403.25	201.712	1.711656e+002	1.756042e+001	200	43	7.370023e+000	0	0	0	1	0	0	139.019	1	1	48.2044	41.6
DATA	328	4	73	0	0	A_64_P016419	NM_001000622	5429.11	201.5	4.005144e+001	5.618032e+000	92.5	38	7.309640e+000	0	0	0	0	0	0	32.3935	1	1	56.9804	39.3913
DATA	329	4	74	0	0	A_44_P306863	XM_344447	5454.45	201.394	5.050100e+002	5.065562e+001	472	38	8.324996e+000	0	0	0	0	0	0	406.888	1	1	45.4864	37.75
DATA	330	4	75	0	0	A_42_P471835	TC610276	5479.67	201.5	1.309008e+003	1.309609e+002	1065	36	8.177643e+000	0	0	0	0	0	0	1050.97	1	1	57.5363	36.9231
DATA	331	4	76	0	1	ETG02_36680	ETG02_36680	5505.42	201.573	8.243492e+000	4.066209e+000	69	36.5	9.918384e+000	0	0	0	0	0	0	6.59683	1	0	57.5363	38.6786
DATA	332	4	77	66	1	DarkCorner	DarkCorner	5530.36	201.877	4.007942e+000	3.993073e+000	55	43	6.480077e+000	0	0	0	0	0	0	-5.56795	0	0	48.5334	41.5161
DATA	333	4	78	66	1	DarkCorner	DarkCorner	5555.88	201.27	4.018376e+000	4.003467e+000	61	41	7.859480e+000	0	0	0	0	0	0	-1.253	0	0	48.2044	41.6667
DATA	334	4	79	66	1	DarkCorner	DarkCorner	5581.9	201.628	4.027199e+000	4.012257e+000	56	42	7.056724e+000	0	0	0	0	0	0	-2.6336	0	0	52.0157	41.1212
DATA	335	4	80	66	1	DarkCorner	DarkCorner	5606.88	202.104	4.034031e+000	4.019064e+000	58	40.5	1.063010e+001	0	0	0	0	0	0	-1.65378	0	0	46.1809	41.9688
DATA	336	4	81	66	1	DarkCorner	DarkCorner	5631.91	201.609	4.039432e+000	4.024446e+000	55.5	42	7.973084e+000	0	0	0	0	0	0	-4.37518	0	0	52.0157	42.1515
DATA	337	4	82	66	1	DarkCorner	DarkCorner	5657.5	201.648	4.042960e+000	4.028455e+000	59	37.5	9.065419e+000	0	0	0	0	0	0	0.499178	0	0	57.5363	40
DATA	338	4	83	66	1	DarkCorner	DarkCorner	5683	201.545	4.044529e+000	4.041186e+000	63	39.5	1.071424e+001	0	0	0	0	0	0	2.42609	0	0	55.8519	42.5882
DATA	339	4	84	66	1	DarkCorner	DarkCorner	5709.14	201.629	4.043914e+000	4.043089e+000	61.5	47	9.007752e+000	0	0	0	0	0	0	2.67559	0	0	47.2035	44.7037
DATA	340	4	85	66	1	DarkCorner	DarkCorner	5733.49	201.082	4.041414e+000	4.026887e+000	60	37	9.312654e+000	0	0	0	0	0	0	0.485445	0	0	43.7019	37.9249
DATA	341	5	1	66	1	DarkCorner	DarkCorner	3587.64	207.526	3.479931e+000	3.467020e+000	60	38	8.505048e+000	0	0	0	0	0	0	-0.0291532	0	0	49.8279	38.8221
DATA	342	5	2	66	1	DarkCorner	DarkCorner	3613.42	207.427	3.465162e+000	3.458981e+000	63	45.5	7.700752e+000	0	0	0	0	0	0	1.98244	0	0	57.5363	45.8889
DATA	343	5	3	66	1	DarkCorner	DarkCorner	3638.67	207.5	3.450961e+000	3.443353e+000	62	44	1.159673e+001	0	0	0	0	0	0	1.75239	0	0	57.5363	46.2
DATA	344	5	4	66	1	DarkCorner	DarkCorner	3664.06	208.244	3.436961e+000	3.424210e+000	59	42.5	9.319718e+000	0	0	0	0	0	0	-1.32513	0	0	49.8279	44.2
DATA	345	5	5	66	1	DarkCorner	DarkCorner	3689.38	207.085	3.423464e+000	3.410763e+000	60	42	7.617510e+000	0	0	0	0	0	0	-0.906709	0	0	50.7771	43.2143
DATA	346	5	6	66	1	DarkCorner	DarkCorner	3715.48	206.706	3.409909e+000	3.397258e+000	61	44	9.679309e+000	0	0	0	0	0	0	-0.385037	0	0	50.4627	44.2439
DATA	347	5	7	66	1	DarkCorner	DarkCorner	3739.85	207.382	3.397632e+000	3.385027e+000	60	47.5	1.037913e+001	0	0	0	0	0	0	-1.2422	0	0	42.2201	49.9706
DATA	348	5	8	66	1	DarkCorner	DarkCorner	3765.67	207.5	7.055152e+000	3.445567e+000	68	41.5	1.048842e+001	0	0	0	0	0	0	6.66572	1	0	57.5363	44.8438
DATA	349	5	9	66	1	DarkCorner	DarkCorner	3792.4	207.575	3.372709e+000	3.360196e+000	58	42	8.390392e+000	0	0	0	0	0	0	-4.45674	0	0	50.7771	44.5116
DATA	350	5	10	0	0	A_43_P17919	XM_001070979	3816.94	207.206	2.970791e+001	4.477033e+000	89	47	6.623579e+000	0	0	0	0	0	0	28.2625	1	1	45.4864	46.4444
DATA	351	5	11	0	0	A_42_P826221	NM_012933	3841.63	207.37	2.284019e+003	2.284263e+002	2174	43	7.601206e+000	0	0	0	0	0	0	2179.65	1	1	48.2044	43.2759
DATA	352	5	12	0	0	A_64_P011524	NM_001194951	3867.12	207.384	5.744316e+002	5.753953e+001	593.5	43	8.497652e+000	0	0	0	0	0	0	549.855	1	1	48.5334	43.2857
DATA	353	5	13	0	0	A_44_P258417	NM_001009699	3892.57	207.395	9.508832e+001	1.007152e+001	151	41	1.085273e+001	0	0	0	0	0	0	91.2814	1	1	49.5074	43.8214
DATA	354	5	14	0	0	A_64_P164617	A_64_P164617	3918.33	207.5	2.892943e+004	2.892945e+003	28011.5	41	1.067281e+001	0	0	0	0	0	0	27846.8	1	1	57.5363	45.2963
DATA	355	5	15	0	0	A_42_P758933	NM_001106476	3943	207.5	5.525913e+003	5.526011e+002	5145	45	1.062185e+001	0	0	0	0	0	0	5332.02	1	1	48.5334	47.9032
DATA	356	5	16	0	0	A_42_P573312	NM_001134761	3969	207.545	3.762364e+002	3.776760e+001	416	43	1.055061e+001	0	0	0	0	0	0	363.891	1	1	55.8519	46.3793
DATA	357	5	17	0	0	A_64_P096257	NM_001160228	3993.77	207.268	7.044169e+002	7.051837e+001	721.5	42	9.658598e+000	0	0	0	0	0	0	682.701	1	1	47.2035	44.5667
DATA	358	5	18	0	0	A_43_P15847	NM_178847	4019.67	207.453	1.622989e+002	1.655830e+001	218	49	1.301062e+001	0	0	0	0	0	0	157.599	1	1	49.1849	49.2593
DATA	359	5	19	0	0	A_64_P139962	NM_001000675	4045.33	207.5	1.131482e+001	3.465768e+000	73	43	9.106656e+000	0	0	0	0	0	0	11.0058	1	0	57.5363	43.7419
DATA	360	5	20	0	0	A_64_P117474	NM_001000646	4070.58	207.573	1.763061e+001	3.715995e+000	79	42	1.258497e+001	0	0	0	0	0	0	17.174	1	1	65	44.9714
DATA	361	5	21	0	1	ERCC-00075_180	ERCC-00075_180	4096	207.545	2.691266e+001	4.232809e+000	86	40.5	7.779620e+000	0	0	0	0	0	0	26.2481	1	1	55.8519	42.6786
DATA	362	5	22	0	0	A_42_P740730	NM_001012136	4121.42	207.573	7.626280e+000	3.351688e+000	68	45.5	1.459507e+001	0	0	0	0	0	0	7.44549	1	0	57.5363	49.1333
DATA	363	5	23	0	0	A_42_P702258	NM_017227	4146.58	207.573	1.519321e+001	3.597786e+000	78	42	1.470138e+001	0	0	0	0	0	0	14.8445	1	0	65	47.6957
DATA	364	5	24	0	0	A_42_P668800	NM_001127553	4171.56	207.813	5.446367e+002	5.456112e+001	582	49	1.330126e+001	0	0	0	0	0	0	532.425	1	1	49.1849	49.931
DATA	365	5	25	0	0	A_42_P842513	NM_031077	4197.37	207.63	2.499575e+003	2.499787e+002	2488.5	43.5	1.188361e+001	0	0	0	0	0	0	2444.32	1	1	48.2044	44.1471
DATA	366	5	26	0	0	A_64_P047697	NM_001161835	4222.4	207.649	2.255896e+002	2.279303e+001	284	42	1.055767e+001	0	0	0	0	0	0	220.619	1	1	49.8279	42.1852
DATA	367	5	27	0	0	A_42_P660036	NM_001134727	4248.42	207.573	1.382244e+002	1.420138e+001	189	47	9.830827e+000	0	0	0	0	0	0	135.156	1	1	57.5363	47.25
DATA	368	5	28	0	0	A_64_P095050	A_64_P095050	4273.5	208	3.397816e+004	3.397817e+003	33112	45	8.758546e+000	0	0	0	0	0	0	33210.6	1	1	54.1152	44.9545
DATA	369	5	29	0	0	A_42_P561835	ENSRNOT00000043937	4298.77	208.041	1.439575e+002	1.476073e+001	204	45	7.550023e+000	0	0	0	0	0	0	140.615	1	1	47.5395	44.8148
DATA	370	5	30	0	0	A_64_P098774	ENSRNOT00000002068	4324.5	208	1.509513e+001	3.597118e+000	75.5	45	9.360531e+000	0	0	0	0	0	0	14.7315	1	0	54.1152	44.3667
DATA	371	5	31	0	0	A_64_P163184	NM_001107855	4349.6	208.027	3.246816e+002	3.263228e+001	372	46	9.541888e+000	0	0	0	0	0	0	316.507	1	1	49.1849	46.9524
DATA	372	5	32	0	0	A_42_P549675	NM_080577	4375.5	208	2.346171e+003	2.346399e+002	2259	53	1.202632e+001	0	0	0	0	1	0	2283.92	1	1	54.1152	55.2174
DATA	373	5	33	0	0	A_64_P287740	NM_001127601	4400.5	208	3.301706e+001	4.652892e+000	96.5	46.5	7.774775e+000	0	0	0	0	0	0	32.0902	1	1	65	46.3667
DATA	374	5	34	0	0	A_64_P059545	NM_053477	4425.78	207.866	2.063071e+003	2.063332e+002	2092	41	7.414372e+000	0	0	0	0	0	0	2001.49	1	1	46.1809	41.4828
DATA	375	5	35	0	0	A_44_P465856	NM_199398	4451.5	208	1.169409e+001	3.492925e+000	76	45.5	9.609382e+000	0	0	0	0	0	0	11.3212	1	0	54.1152	46.2667
DATA	376	5	36	0	0	A_42_P714075	NM_031723	4476.55	207.773	7.537796e+002	7.545011e+001	777.5	44.5	1.120162e+001	0	0	0	0	0	0	728.087	1	1	46.1809	47.9286
DATA	377	5	37	0	0	A_42_P605265	NM_053677	4502.5	208	3.127081e+001	4.551651e+000	89.5	42	7.833619e+000	0	0	0	0	0	0	30.1268	1	1	54.1152	43.0323
DATA	378	5	38	0	0	A_64_P047401	NM_001009369	4527.44	208.027	1.036327e+003	1.036857e+002	1079	43	7.209484e+000	0	0	0	0	0	0	995.714	1	1	48.5334	42.32
DATA	379	5	39	0	0	A_64_P018891	A_64_P018891	4552.61	207.922	7.975422e+001	8.641221e+000	139.5	46.5	1.132919e+001	0	0	0	0	0	0	76.4031	1	1	49.1849	47.8333
DATA	380	5	40	0	0	A_64_P026297	NM_022583	4578.5	208.352	4.385644e+001	5.510840e+000	105	46	1.272137e+001	0	0	0	0	0	0	41.8774	1	1	65	47.2
DATA	381	5	41	0	0	A_43_P13508	NM_001015031	4603.45	207.627	4.929495e+001	5.959035e+000	111.5	47	1.284615e+001	0	0	0	0	0	0	46.9134	1	1	46.1809	47.0968
DATA	382	5	42	0	0	A_64_P077426	XM_001080794	4628.83	207.677	5.814131e+003	5.814228e+002	5498	46	1.222123e+001	0	0	0	0	0	0	5513.36	1	1	45.4864	48.6071
DATA	383	5	43	0	0	A_44_P370175	NM_031773	4654.5	208.352	4.418976e+001	5.559259e+000	104	44	9.508768e+000	0	0	0	0	0	0	41.7435	1	1	57.5363	44.6667
DATA	384	5	44	0	0	A_64_P084288	NM_001000496	4680	208.455	5.867754e+000	3.437116e+000	69	39	1.001095e+001	0	0	0	0	0	0	5.52079	1	0	65	42.1724
DATA	385	5	45	0	0	A_44_P400936	A_44_P400936	4705.19	208.167	2.097746e+002	2.125132e+001	258	43	9.715916e+000	0	0	0	0	0	0	196.555	1	1	47.5395	44.4483
DATA	386	5	46	0	0	A_64_P019599	NM_012713	4730.58	208.427	1.709840e+002	1.743620e+001	221	46	7.818595e+000	0	0	0	0	0	0	159.516	1	1	57.5363	46.5
DATA	387	5	47	0	0	A_44_P644356	AI556299	4756.27	208.313	2.681829e+001	4.354851e+000	85.5	40	9.745776e+000	0	0	0	0	0	0	24.9056	1	1	46.1809	42.3611
DATA	388	5	48	0	0	A_64_P057076	A_64_P057076	4781.62	208.164	9.195437e+001	9.820327e+000	144	38	5.434930e+000	0	0	0	0	0	0	84.9991	1	1	48.5334	38.3333
DATA	389	5	49	0	0	A_64_P087392	NM_001108764	4806.89	208.5	1.007882e+002	1.065737e+001	157.5	40	7.664395e+000	0	0	0	0	0	0	92.72	1	1	56.9804	39.775
DATA	390	5	50	0	0	A_44_P436604	NM_001025627	4832.42	208.427	1.145966e+001	3.664736e+000	74	34	3.253637e+000	0	0	0	0	0	0	10.49	1	0	65	34.8846
DATA	391	5	51	0	0	A_43_P23200	NM_001107832	4857.58	208.427	2.740570e+002	2.762811e+001	307	40	6.617401e+000	0	0	0	0	0	0	249.608	1	1	57.5363	38.04
DATA	392	5	52	0	0	A_42_P515876	NM_031097	4883.11	208.5	2.908900e+002	2.930082e+001	327.5	42	8.627492e+000	0	0	0	0	0	0	263.56	1	1	65	42.4857
DATA	393	5	53	0	0	A_44_P1047924	NM_053523	4908.31	208.338	2.052105e+003	2.052410e+002	1864	40.5	8.592355e+000	0	0	0	0	0	0	1849.55	1	1	48.5334	41.3333
DATA	394	5	54	0	0	A_44_P682668	NM_001014228	4933.89	208.5	9.853515e+001	1.047506e+001	152	45	9.589506e+000	0	0	0	0	0	0	88.3286	1	1	56.9804	43.8
DATA	395	5	55	0	0	A_64_P061489	NM_001108746	4959.42	208.427	1.151398e+001	3.755084e+000	73	46.5	9.155549e+000	0	0	0	0	0	0	10.2647	1	0	57.5363	46.25
DATA	396	5	56	0	0	A_64_P047747	NM_182474	4984.51	208.589	1.074079e+003	1.074680e+002	1014	37.5	5.530579e+000	0	0	0	0	0	0	952.322	1	1	48.5334	37.9286
DATA	397	5	57	0	0	A_64_P091163	NM_001107083	5010.11	208.5	4.884757e+001	6.076403e+000	106	39.5	6.919721e+000	0	0	0	0	0	0	43.0667	1	1	56.9804	39.9444
DATA	398	5	58	0	0	A_64_P133992	NM_001008825	5035.5	208.5	3.905900e+001	5.335334e+000	96	42	8.798004e+000	0	0	0	0	0	0	34.2432	1	1	57.5363	41.5366
DATA	399	5	59	0	0	A_42_P503768	NM_001009466	5060.67	208.5	1.731524e+002	1.769679e+001	214.5	43	9.469292e+000	0	0	0	0	0	0	150.955	1	1	57.5363	43.1034
DATA	400	5	60	0	0	A_44_P400346	ENSRNOT00000059540	5086.42	208.573	5.187884e+001	6.358231e+000	110	45	1.092215e+001	0	0	0	0	0	0	44.9692	1	1	57.5363	43.7037
DATA	401	5	61	0	0	A_64_P128438	NM_012591	5111.58	208.573	1.335172e+003	1.335683e+002	1160	42	9.959974e+000	0	0	0	0	0	0	1150.87	1	1	57.5363	42.625
DATA	402	5	62	0	0	A_44_P531758	NM_012935	5136.75	208.553	2.018289e+004	2.018293e+003	17130.5	43	8.419790e+000	0	0	0	0	0	0	17299.9	1	1	49.5074	43.8214
DATA	403	5	63	0	0	A_43_P10257	NM_203335	5162.38	208.57	3.128286e+003	3.128509e+002	2699.5	42	7.508530e+000	0	0	0	0	0	0	2666.32	1	1	50.4627	43.4063
DATA	404	5	64	0	0	A_64_P011744	NM_001108789	5187.46	208.473	1.846970e+002	1.884834e+001	224	40	8.446075e+000	0	0	0	0	0	0	156.561	1	1	49.1849	40.4815
DATA	405	5	65	0	0	A_44_P282794	NM_001107523	5213.23	208.9	2.959928e+001	4.800928e+000	90.5	43	5.487559e+000	0	0	0	0	0	0	24.9517	1	1	44.4243	42.4483
DATA	406	5	66	0	0	A_42_P463784	NM_001008526	5238.51	208.64	5.944024e+002	5.956160e+001	549	43	7.867982e+000	0	0	0	1	0	0	498.386	1	1	49.8279	42.7826
DATA	407	5	67	0	0	A_42_P630463	NM_022238	5264	208.545	1.593956e+002	1.639102e+001	196	41.5	9.073568e+000	0	0	0	0	0	0	132.941	1	1	55.8519	42.1563
DATA	408	5	68	0	0	A_64_P006728	NM_001108905	5289.44	208.517	1.404934e+003	1.405459e+002	1224.5	47	1.156683e+001	0	0	0	0	0	0	1165.73	1	1	52.9257	46.3333
DATA	409	5	69	0	0	A_44_P360629	NM_001000030	5314.63	208.722	6.115634e+001	7.231547e+000	115	39	1.013499e+001	0	0	0	0	0	0	50.4931	1	1	48.2044	41.2222
DATA	410	5	70	0	0	A_64_P024620	NM_001006995	5340.09	209.328	1.049182e+004	1.049190e+003	8543	39.5	8.195027e+000	0	0	0	0	0	0	8620.83	1	1	45.1352	42.0385
DATA	411	5	71	0	0	A_64_P091194	ENSRNOT00000049254	5365.56	208.973	4.886050e+003	4.886206e+002	4133.5	45	1.063184e+001	0	0	0	0	0	0	3995.97	1	1	48.5334	43.7297
DATA	412	5	72	0	0	A_44_P334922	NM_022379	5390.91	208.614	5.711842e+000	3.955009e+000	65	40	8.707479e+000	0	0	0	0	0	0	4.65057	1	0	57.259	41.0345
DATA	413	5	73	0	0	A_42_P482051	XM_001059157	5416.44	208.93	7.119723e+002	7.130561e+001	626	43.5	7.530962e+000	0	0	0	1	0	0	577.249	1	1	48.2044	41.6538
DATA	414	5	74	0	0	A_42_P674742	XM_002726367	5441.57	208.853	3.142413e+003	3.142661e+002	2616	39.5	5.529585e+000	0	0	0	0	0	0	2537.81	1	1	47.2035	39.45
DATA	415	5	75	0	0	A_64_P105211	XM_233310	5467.39	208.931	1.927177e+001	4.404334e+000	77	42	8.752865e+000	0	0	0	0	0	0	15.5057	1	0	53.8203	40.3913
DATA	416	5	76	0	0	A_64_P058523	NM_134385	5492.5	209	1.026583e+001	4.104059e+000	70	40	1.159741e+001	0	0	0	0	0	0	8.23212	1	0	54.1152	42
DATA	417	5	77	0	0	A_44_P586876	NM_001100805	5517.93	208.786	8.606395e+002	8.615620e+001	738	38	9.288233e+000	0	0	0	0	0	0	688.016	1	1	46.8651	39.9333
DATA	418	5	78	66	1	DarkCorner	DarkCorner	5542.97	209.239	4.011371e+000	3.996488e+000	58	43	6.578947e+000	0	0	0	0	0	0	-2.21793	0	0	46.1809	42.4444
DATA	419	5	79	66	1	DarkCorner	DarkCorner	5568.5	209	4.020956e+000	4.013991e+000	61	37	8.605156e+000	0	0	0	0	0	0	2.00883	0	0	54.1152	38.95
DATA	420	5	80	66	1	DarkCorner	DarkCorner	5593.95	209.231	4.028819e+000	4.027513e+000	62.5	42	7.757816e+000	0	0	0	0	0	0	2.62922	0	0	45.835	41.6061
DATA	421	5	81	66	1	DarkCorner	DarkCorner	5619.49	208.623	4.035234e+000	4.020263e+000	58.5	37	8.279013e+000	0	0	0	0	0	0	-1.2452	0	0	46.5243	39.0278
DATA	422	5	82	66	1	DarkCorner	DarkCorner	5644.91	209.065	4.039547e+000	4.024560e+000	60.5	37.5	8.293575e+000	0	0	0	0	0	0	-0.414473	0	0	54.4085	39.5952
DATA	423	5	83	66	1	DarkCorner	DarkCorner	5670.5	209	4.042099e+000	4.042901e+000	61	38	1.162753e+001	0	0	0	0	0	0	2.82526	0	0	65	40.2593
DATA	424	5	84	66	1	DarkCorner	DarkCorner	5695.78	209.083	4.042570e+000	4.033604e+000	61.5	43	9.420180e+000	0	0	0	0	0	0	1.74468	0	0	44.7812	41.8387
DATA	425	5	85	66	1	DarkCorner	DarkCorner	5720.61	209.194	6.802968e+000	4.083053e+000	64	41	9.520202e+000	0	0	0	0	0	0	5.38428	1	0	47.8731	41.9811
DATA	426	6	1	66	1	DarkCorner	DarkCorner	3600.86	214.348	3.471726e+000	3.465280e+000	61	46.5	8.426357e+000	0	0	0	0	0	0	1.94456	0	0	46.8651	44.1429
DATA	427	6	2	66	1	DarkCorner	DarkCorner	3626.26	214.106	3.457403e+000	3.446850e+000	60	46	9.243230e+000	0	0	0	0	0	0	1.15815	0	0	45.835	45.3611
DATA	428	6	3	66	1	DarkCorner	DarkCorner	3651.07	214.509	3.443647e+000	3.431532e+000	61	43	7.589579e+000	0	0	0	0	0	0	0.625452	0	0	42.2201	44.4211
DATA	429	6	4	66	1	DarkCorner	DarkCorner	3677	214.545	3.429648e+000	3.417620e+000	62	41	8.403488e+000	0	0	0	0	0	0	0.643389	0	0	55.8519	42.7838
DATA	430	6	5	66	1	DarkCorner	DarkCorner	3701.53	214.958	3.416745e+000	3.404069e+000	59.5	44	9.134108e+000	0	0	0	0	0	0	-0.758468	0	0	48.5334	43.2571
DATA	431	6	6	66	1	DarkCorner	DarkCorner	3727.81	215.145	3.403364e+000	3.390757e+000	61.5	48.5	1.207810e+001	0	0	0	0	0	0	0.109032	0	0	45.1352	49.8947
DATA	432	6	7	66	1	DarkCorner	DarkCorner	3753.37	214.596	3.390831e+000	3.378251e+000	59	52	1.030336e+001	0	0	0	0	0	0	-1.32738	0	0	65	51.6774
DATA	433	6	8	66	1	DarkCorner	DarkCorner	3778.5	214.648	3.378957e+000	3.366421e+000	58	40	6.448661e+000	0	0	0	0	0	0	-2.74681	0	0	57.5363	40.0909
DATA	434	6	9	0	0	A_64_P034324	NM_001108282	3803.91	214.614	4.387098e+001	5.522899e+000	103	47	6.628251e+000	0	0	0	0	0	0	41.6668	1	1	57.259	46.6061
DATA	435	6	10	0	0	A_64_P071506	ENSRNOT00000025007	3829.5	215	1.511607e+001	3.669749e+000	77	45	6.870644e+000	0	0	0	0	0	0	14.4038	1	0	54.1152	45.0333
DATA	436	6	11	0	0	A_64_P050705	NM_001106061	3854.5	215	1.206810e+002	1.252010e+001	177.5	42	8.484583e+000	0	0	0	0	0	0	115.346	1	1	54.1152	42.5217
DATA	437	6	12	0	0	A_64_P032242	NM_001008898	3880.09	214.935	3.336303e+000	3.324043e+000	63	41	8.866392e+000	0	0	0	0	0	0	0.267651	0	0	65	41.7097
DATA	438	6	13	0	0	A_42_P730320	NM_001013877	3905.5	215	2.780158e+001	4.326304e+000	87	44	1.473485e+001	0	0	0	0	0	0	26.725	1	1	54.1152	47.5172
DATA	439	6	14	0	0	A_64_P123073	A_64_P123073	3930.61	214.931	2.048609e+002	2.075118e+001	254	44	1.042433e+001	0	0	0	0	0	0	197.431	1	1	53.8203	46.1667
DATA	440	6	15	0	0	A_64_P064709	NM_001166303	3956.5	215	7.510824e+001	8.203116e+000	133.5	44.5	1.006393e+001	0	0	0	0	0	0	72.5606	1	1	54.1152	46.6
DATA	441	6	16	0	0	A_44_P123381	NM_013012	3981.5	215	7.102089e+000	3.366928e+000	69	42.5	9.205319e+000	0	0	0	0	0	0	6.87601	1	0	54.1152	45.1875
DATA	442	6	17	0	0	A_44_P557487	NM_053617	4006.88	214.791	8.916981e+001	9.502701e+000	151	47.5	1.652127e+001	0	0	0	0	0	0	86.5032	1	1	46.1809	51.2857
DATA	443	6	18	0	0	A_64_P084971	NM_017007	4032.17	215	1.365215e+004	1.365219e+003	13228	43	8.492755e+000	0	0	0	0	0	0	13267.4	1	1	46.8651	44.2424
DATA	444	6	19	0	0	A_42_P770556	NM_033096	4057.67	214.75	3.912930e+003	3.913067e+002	3844	44	7.504980e+000	0	0	0	0	0	0	3808.65	1	1	47.5395	42.5161
DATA	445	6	20	0	0	A_64_P023381	XM_001073278	4083.5	215	5.050843e+001	6.016521e+000	108.5	38	8.832165e+000	0	0	0	0	0	0	49.2296	1	1	54.1152	39.4118
DATA	446	6	21	0	0	A_64_P059217	NM_053667	4108.34	215.027	2.051444e+002	2.077273e+001	266	41	7.389647e+000	0	0	0	0	0	0	200.17	1	1	49.1849	40.7917
DATA	447	6	22	0	0	A_44_P286215	NM_001008885	4133.92	215.211	2.150004e+002	2.174618e+001	271	39	8.618630e+000	0	0	0	0	0	0	209.976	1	1	46.8651	39.931
DATA	448	6	23	0	0	A_64_P138056	A_64_P138056	4159.44	214.779	2.973962e+002	2.991781e+001	355.5	43	1.298159e+001	0	0	0	0	0	0	290.642	1	1	46.8651	47
DATA	449	6	24	0	0	A_44_P280799	NM_001000654	4184.58	215.427	1.695967e+001	3.673942e+000	77.5	51	1.247418e+001	0	0	0	0	0	0	16.5815	1	1	65	51.0294
DATA	450	6	25	0	0	A_64_P111599	NM_001191586	4210.42	215.427	2.858874e+002	2.877383e+001	341	44	1.301192e+001	0	0	0	0	0	0	279.568	1	1	57.5363	45.68
DATA	451	6	26	0	0	A_64_P088635	ENSRNOT00000059643	4235.5	215.352	1.512988e+001	3.592678e+000	79	43	8.785186e+000	0	0	0	0	0	0	14.7948	1	0	57.5363	44.4444
DATA	452	6	27	0	0	A_64_P042332	NM_021860	4261	215.455	7.367412e+000	3.341706e+000	66.5	47	8.758971e+000	0	0	0	0	0	0	7.20223	1	0	55.8519	47.1429
DATA	453	6	28	0	0	A_42_P599080	NM_053753	4286	214.774	7.714569e+002	7.721459e+001	807	43	8.361661e+000	0	0	0	1	0	0	753.778	1	1	45.4864	42.9259
DATA	454	6	29	0	0	A_44_P576954	NM_001106645	4311.32	215.273	4.581657e+002	4.593266e+001	494	43	8.082502e+000	0	0	0	0	0	0	447.327	1	1	49.8279	43.7727
DATA	455	6	30	0	0	A_64_P046687	A_64_P046687	4337.42	215.427	1.500849e+003	1.501204e+002	1513	43	7.440806e+000	0	0	0	0	0	0	1463.84	1	1	57.5363	41.9677
DATA	456	6	31	0	0	A_42_P694928	NM_001109046	4362.36	215	1.697211e+002	1.728443e+001	228	47	1.043840e+001	0	0	0	0	0	0	165.334	1	1	46.5243	48.963
DATA	457	6	32	0	0	A_64_P032811	NM_001134575	4387.95	215.477	2.603121e+001	4.184172e+000	86	44	1.174393e+001	0	0	0	0	0	0	25.3206	1	1	55.8519	47
DATA	458	6	33	0	0	A_64_P141070	ENSRNOT00000058701	4413.3	215.076	5.499481e+001	6.404074e+000	113	44	7.893587e+000	0	0	0	0	0	0	53.402	1	1	45.835	43.9394
DATA	459	6	34	0	0	A_64_P093462	NM_001108129	4438.5	215.056	6.445054e+003	6.445138e+002	6309	43	7.674248e+000	0	0	0	0	0	0	6246.29	1	1	48.5334	44.5862
DATA	460	6	35	0	0	A_42_P799306	ENSRNOT00000015782	4464.33	215.5	3.492348e+001	4.801481e+000	96	45	1.201559e+001	0	0	0	0	0	0	33.7714	1	1	65	47.8214
DATA	461	6	36	0	0	A_42_P726743	NM_001108985	4489	214.774	5.876341e+002	5.885616e+001	622	41	7.041040e+000	0	0	0	0	0	0	566.919	1	1	45.4864	41.9487
DATA	462	6	37	0	0	A_44_P228341	NM_001025701	4514.63	215.36	1.433198e+003	1.433580e+002	1392.5	42	6.501117e+000	0	0	0	0	0	0	1379.01	1	1	48.8603	42.2581
DATA	463	6	38	0	0	A_42_P571433	NM_031059	4539.84	215.675	1.345738e+003	1.346148e+002	1327	43	7.218954e+000	0	0	0	0	0	0	1291.19	1	1	50.4627	42.5517
DATA	464	6	39	0	0	A_44_P132783	NM_214833	4565.58	215.573	6.623763e+001	7.414325e+000	127	44	1.270372e+001	0	0	0	0	0	0	63.3554	1	1	57.5363	46.3333
DATA	465	6	40	0	0	A_44_P119215	NM_001108941	4591.11	215.5	3.806988e+001	5.066030e+000	98	47	1.037160e+001	0	0	0	0	0	0	36.2933	1	1	65	47.1515
DATA	466	6	41	0	0	A_44_P124259	XM_345871	4616.5	215.5	2.519053e+001	4.194685e+000	88	45.5	1.025452e+001	0	0	0	0	0	0	23.9313	1	1	57.5363	45.2353
DATA	467	6	42	0	0	A_44_P422063	NM_001107631	4641.67	215.5	1.379295e+002	1.419780e+001	195	43	1.017666e+001	0	0	0	0	0	0	130.556	1	1	57.5363	45.2333
DATA	468	6	43	0	0	A_44_P1033023	NM_013063	4666.86	215.278	3.760572e+003	3.760723e+002	3422	44	8.664328e+000	0	0	0	0	0	0	3545.87	1	1	47.8731	43.4
DATA	469	6	44	0	0	A_64_P121618	NM_001134542	4692.63	215.427	2.074022e+002	2.101598e+001	253	45.5	1.428633e+001	0	0	0	0	0	0	194.756	1	1	49.1849	50.8929
DATA	470	6	45	0	0	A_64_P042188	ENSRNOT00000034890	4718	215.545	3.047876e+003	3.048066e+002	3003	44	1.346881e+001	0	0	0	0	0	0	2849.93	1	1	55.8519	46.8621
DATA	471	6	46	0	0	A_42_P561616	AI234869	4743.07	215.514	3.821456e+002	3.836752e+001	397.5	47	1.004021e+001	0	0	0	0	0	0	355.773	1	1	48.5334	45.5667
DATA	472	6	47	0	0	A_42_P588606	NM_001134544	4768.58	215.573	1.170079e+002	1.219553e+001	173	36	8.385984e+000	0	0	0	0	0	0	108.434	1	1	57.5363	38.5161
DATA	473	6	48	0	0	A_42_P568897	NM_001005563	4794.04	215.653	2.896813e+002	2.917340e+001	327.5	41	5.695060e+000	0	0	0	0	0	0	267.185	1	1	48.5334	40.0606
DATA	474	6	49	0	0	A_64_P096356	NM_012640	4819.63	215.36	1.295690e+004	1.295695e+003	12100.5	35	6.699296e+000	0	0	0	0	0	0	11892.1	1	1	48.8603	36.2941
DATA	475	6	50	0	0	A_64_P006418	A_64_P006418	4845.26	215.5	3.532674e+003	3.532847e+002	3370	37	5.346338e+000	0	0	0	0	0	0	3226.04	1	1	50.4627	37
DATA	476	6	51	0	0	A_64_P156389	A_64_P156389	4870.51	215.597	5.821941e+001	6.796662e+000	119	38.5	7.056097e+000	0	0	0	0	0	0	52.896	1	1	45.835	37.9333
DATA	477	6	52	0	0	A_42_P576446	NM_001107673	4895.5	215.5	4.340700e+003	4.340843e+002	3916.5	42.5	9.565503e+000	0	0	0	0	0	0	3923.53	1	1	46.5243	42.8667
DATA	478	6	53	0	0	A_64_P022804	A_64_P022804	4920.85	215.836	1.017329e+003	1.017946e+002	984	45	1.145998e+001	0	0	0	0	0	0	914.684	1	1	47.5395	45.7419
DATA	479	6	54	0	0	A_64_P162356	A_64_P162356	4946.44	215.973	4.636979e+003	4.637115e+002	4140	44.5	8.341900e+000	0	0	0	0	0	0	4146.45	1	1	48.5334	43.5714
DATA	480	6	55	0	0	A_44_P266776	NM_199388	4972.06	215.833	4.775542e+002	4.788965e+001	481.5	37	7.407550e+000	0	0	0	0	0	0	424.674	1	1	46.8651	39.1111
DATA	481	6	56	0	0	A_64_P035066	NM_001008960	4997.5	216	7.075649e+000	3.671954e+000	70	38	9.886285e+000	0	0	0	0	0	0	6.25729	1	0	54.1152	41.6364
DATA	482	6	57	0	0	A_64_P072728	NM_001100667	5022.71	215.894	3.182941e+003	3.183147e+002	2841	42	8.782314e+000	0	0	0	0	0	0	2799.19	1	1	45.835	41.0645
DATA	483	6	58	0	0	A_64_P028446	NM_001106007	5048	215.797	1.045582e+003	1.046216e+002	952	42	9.146478e+000	0	0	0	0	0	0	914.376	1	1	46.8651	43.5161
DATA	484	6	59	0	0	A_44_P251212	NM_031715	5073.15	215.864	1.691896e+004	1.691900e+003	14754	40	8.767656e+000	0	0	0	0	0	0	14713.3	1	1	46.1809	41.5556
DATA	485	6	60	0	0	A_42_P818240	NM_001108334	5098.6	215.643	7.059471e+003	7.059567e+002	6022.5	39.5	1.050282e+001	0	0	0	0	0	0	6104.44	1	1	47.2035	40.3667
DATA	486	6	61	0	0	A_64_P023122	NM_001080208	5124.5	216	1.206747e+001	3.897628e+000	72	42	9.185335e+000	0	0	0	0	0	0	10.3752	1	0	54.1152	41.2963
DATA	487	6	62	0	0	A_44_P217821	NM_001107292	5149.11	215.714	2.528388e+002	2.555700e+001	281	42	1.107011e+001	0	0	0	0	0	0	216.201	1	1	45.1352	43.1212
DATA	488	6	63	0	0	A_64_P007372	NM_001105895	5175.09	216.065	9.714837e+000	3.871459e+000	71	40	8.528652e+000	0	0	0	0	0	0	8.26008	1	0	54.4085	41.6875
DATA	489	6	64	0	0	A_42_P792382	NM_017257	5200.3	215.9	2.626553e+003	2.626823e+002	2291	41.5	7.710909e+000	0	0	0	0	0	0	2221.06	1	1	47.2035	41.2353
DATA	490	6	65	0	0	A_43_P12232	NM_022512	5225.86	215.71	1.059118e+003	1.059795e+002	962	41.5	7.638365e+000	0	0	0	0	0	0	890.725	1	1	46.5243	39.7692
DATA	491	6	66	0	0	A_64_P158475	A_64_P158475	5251.41	215.902	4.069677e+003	4.069855e+002	3427	43	6.893194e+000	0	0	0	0	0	0	3404.37	1	1	49.8279	43.129
DATA	492	6	67	0	0	A_64_P043361	NM_001197023	5276.36	216.072	6.897862e+001	7.889154e+000	119.5	46	1.116547e+001	0	0	0	0	0	0	57.4082	1	1	46.5243	46.4333
DATA	493	6	68	0	0	A_64_P080851	NM_001105753	5301.42	216.37	2.941678e+001	4.843418e+000	90	42	1.082074e+001	0	0	0	0	0	0	24.3606	1	1	48.5334	44.3704
DATA	494	6	69	0	0	A_44_P129330	NM_001107505	5327.34	216.122	6.684418e+002	6.695595e+001	613	38	7.582875e+000	0	0	0	0	0	0	550.773	1	1	48.8603	39.2
DATA	495	6	70	0	0	A_64_P008827	NM_001014012	5352.78	215.868	8.407619e+002	8.416593e+001	747	44	7.983974e+000	0	0	0	0	0	0	689.468	1	1	46.1809	43.6207
DATA	496	6	71	0	0	A_64_P026222	NM_001101019	5378.34	216.054	4.369521e+001	5.859091e+000	97.5	44	1.129491e+001	0	0	0	0	0	0	35.6694	1	1	42.5954	44.6216
DATA	497	6	72	0	0	A_64_P067749	NM_012659	5403.3	216.1	1.466935e+004	1.466941e+003	12051.5	41	1.044891e+001	0	0	0	0	0	0	11924.2	1	1	47.2035	42.5862
DATA	498	6	73	0	0	A_44_P362981	NM_145878	5428.63	215.735	1.850141e+004	1.850145e+003	14030	43	7.113836e+000	0	0	0	0	0	0	14977.6	1	1	46.5243	43.24
DATA	499	6	74	0	0	A_64_P146654	NM_031698	5454.36	215.871	1.315658e+003	1.316251e+002	1129	38.5	7.754569e+000	0	0	0	0	0	0	1060.97	1	1	46.8651	38.2667
DATA	500	6	75	0	0	A_42_P548800	NM_001007696	5479.57	216.015	2.082684e+003	2.083061e+002	1729	38	1.138929e+001	0	0	0	0	0	0	1673.65	1	1	47.5395	40.8182
DATA	501	6	76	0	0	A_44_P310581	BG673348	5505.09	215.672	1.817462e+003	1.817898e+002	1497	40	1.032537e+001	0	0	0	0	0	0	1455.75	1	1	45.1352	42.5882
DATA	502	6	77	0	0	A_64_P062269	XM_001067531	5530.5	216.5	1.785634e+002	1.829658e+001	204	43	8.152569e+000	0	0	0	0	0	0	142.62	1	1	49.1849	41.1852
DATA	503	6	78	66	1	DarkCorner	DarkCorner	5556	216.455	4.014545e+000	3.999651e+000	60	40	7.562858e+000	0	0	0	0	0	0	-0.79243	0	0	55.8519	41.0556
DATA	504	6	79	66	1	DarkCorner	DarkCorner	5581.42	216.427	4.023230e+000	4.008304e+000	58	39	7.415692e+000	0	0	0	0	0	0	-2.5591	0	0	57.5363	38.2973
DATA	505	6	80	66	1	DarkCorner	DarkCorner	5607.16	216.889	4.030241e+000	4.015289e+000	55.5	38	8.276016e+000	0	0	0	0	0	0	-4.278	0	0	53.5237	38.9143
DATA	506	6	81	66	1	DarkCorner	DarkCorner	5632.33	216.5	4.035606e+000	4.020634e+000	57.5	36.5	9.779492e+000	0	0	0	0	0	0	-3.35051	0	0	57.5363	40.05
DATA	507	6	82	66	1	DarkCorner	DarkCorner	5658.57	216.711	4.039102e+000	4.024116e+000	57	36	7.691638e+000	0	0	0	0	0	0	-3.02146	0	0	51.4001	37
DATA	508	6	83	66	1	DarkCorner	DarkCorner	5682.89	216.5	4.040588e+000	4.025597e+000	57	36	9.622685e+000	0	0	0	0	0	0	-0.42786	0	0	56.9804	37.8966
DATA	509	6	84	66	1	DarkCorner	DarkCorner	5708.18	216.25	4.040129e+000	4.037918e+000	61.5	44.5	9.745776e+000	0	0	0	0	0	0	2.5409	0	0	49.1849	42.8611
DATA	510	6	85	66	1	DarkCorner	DarkCorner	5734.31	216.843	8.564113e+000	4.112341e+000	65	37	8.584356e+000	0	0	0	0	0	0	6.78456	1	0	47.2035	37.2944
DATA	511	7	1	66	1	DarkCorner	DarkCorner	3588	222	3.478310e+000	3.467674e+000	61	38	8.404786e+000	0	0	0	0	0	0	1.15327	0	0	54.9904	37.7716
DATA	512	7	2	66	1	DarkCorner	DarkCorner	3612.59	221.892	3.464395e+000	3.456180e+000	63.5	44	8.456215e+000	0	0	0	0	0	0	1.65244	0	0	48.5334	44.8485
DATA	513	7	3	66	1	DarkCorner	DarkCorner	3638.51	221.764	3.450001e+000	3.437201e+000	57	44.5	9.799157e+000	0	0	0	0	0	0	-1.41499	0	0	42.2201	44.7632
DATA	514	7	4	66	1	DarkCorner	DarkCorner	3664.94	221.635	3.435651e+000	3.422904e+000	60.5	40.5	6.644271e+000	0	0	0	0	0	0	-0.497837	0	0	44.7812	41
DATA	515	7	5	66	1	DarkCorner	DarkCorner	3689.7	221.651	3.422538e+000	3.409840e+000	57	40.5	7.946248e+000	0	0	0	0	0	0	-2.21312	0	0	50.1463	41.4286
DATA	516	7	6	66	1	DarkCorner	DarkCorner	3714.76	222.171	3.409619e+000	3.396969e+000	58	44	1.001403e+001	0	0	0	0	0	0	-2.91621	0	0	50.1463	45.3243
DATA	517	7	7	66	1	DarkCorner	DarkCorner	3740.51	222.607	3.396785e+000	3.384183e+000	58	52	1.047698e+001	0	0	0	0	0	0	-3.73001	0	0	43.7019	51.7273
DATA	518	7	8	66	1	DarkCorner	DarkCorner	3765.61	222.069	3.384766e+000	3.372208e+000	60	42	7.621711e+000	0	0	0	0	0	0	-0.710035	0	0	65	44.0952
DATA	519	7	9	0	0	A_64_P051297	NM_001107416	3790.91	221.896	1.980489e+003	1.980774e+002	1896	42	9.273307e+000	0	0	0	0	0	0	1877.83	1	1	46.8651	44.425
DATA	520	7	10	0	0	A_64_P162378	A_64_P162378	3816.5	222.352	2.836638e+004	2.836640e+003	26690	46	6.904572e+000	0	0	0	0	0	0	26986.2	1	1	57.5363	45.8387
DATA	521	7	11	0	0	A_64_P030634	ENSRNOT00000042606	3841.7	221.797	6.322031e+001	7.149547e+000	121	42	1.013723e+001	0	0	0	0	0	0	60.3336	1	1	45.1352	43.9259
DATA	522	7	12	0	0	A_64_P110009	NM_024392	3866.89	221.727	3.821194e+003	3.821339e+002	3596.5	43	9.374061e+000	0	0	0	0	0	0	3657.62	1	1	45.835	44.1111
DATA	523	7	13	0	0	A_42_P618145	NM_001080783	3892.39	221.871	1.932963e+003	1.933248e+002	1843	37	9.455700e+000	0	0	0	0	0	0	1855.51	1	1	47.2035	40.2222
DATA	525	7	15	0	0	A_64_P101770	NM_001000074	3943.5	222.352	8.398663e+000	3.407421e+000	70	45	1.068416e+001	0	0	0	0	0	0	8.10392	1	0	57.5363	46.7143
DATA	526	7	16	0	0	A_42_P735934	NM_001105729	3968.63	222.471	2.325138e+003	2.325372e+002	2402.5	42.5	9.006320e+000	0	0	0	0	0	0	2248.62	1	1	47.5395	45.3
DATA	528	7	18	0	0	A_42_P718331	NM_133522	4019.38	222	7.269664e+002	7.277068e+001	750.5	47	1.630868e+001	0	0	0	0	0	0	705.837	1	1	48.5334	51.5172
DATA	529	7	19	0	0	A_64_P118054	NM_001037651	4045.33	222.5	1.580211e+001	3.637381e+000	77	42.5	7.573298e+000	0	0	0	0	0	0	15.369	1	0	57.5363	43.25
DATA	530	7	20	0	0	A_64_P044613	A_64_P044613	4070.5	222.5	4.902286e+004	4.902288e+003	47553	44	7.215474e+000	0	0	0	0	0	0	47747.9	1	1	57.5363	42.7838
DATA	531	7	21	0	0	A_43_P13241	NM_134334	4095.89	222.5	1.130823e+004	1.130828e+003	10965.5	42	1.022364e+001	0	0	0	0	0	0	11027.7	1	1	56.9804	43.0909
DATA	532	7	22	0	0	A_44_P524748	NM_001000712	4121.42	222.427	3.276298e+000	3.264167e+000	61.5	40	8.706690e+000	0	0	0	0	0	0	0.123524	0	0	57.5363	41.1613
DATA	533	7	23	0	0	A_64_P126797	ENSRNOT00000048363	4146.58	222.427	6.599833e+001	7.361790e+000	127	41	8.999726e+000	0	0	0	0	0	0	64.4763	1	1	57.5363	43.069
DATA	535	7	25	0	0	A_42_P730411	NM_001012181	4197.5	222.5	4.850840e+002	4.861774e+001	520.5	50	1.396655e+001	0	0	0	0	0	0	474.309	1	1	57.5363	50.2581
DATA	536	7	26	0	0	A_64_P049501	NM_001047970	4222.67	222.5	2.757721e+001	4.268848e+000	89	39	3.961209e+000	0	0	0	0	0	0	26.9668	1	1	57.5363	39.2353
DATA	537	7	27	0	0	A_42_P623688	NM_031031	4247.93	222.493	4.353774e+003	4.353896e+002	4241.5	47	1.108064e+001	0	0	0	0	0	0	4256.74	1	1	48.5334	47.3704
DATA	538	7	28	0	0	A_42_P601217	NM_053460	4273.56	222.25	1.097316e+002	1.144727e+001	171	45.5	7.129598e+000	0	0	0	0	0	0	107.243	1	1	50.7771	44.4545
DATA	540	7	30	0	0	A_42_P791872	NM_001135174	4324.08	222.605	4.210612e+003	4.210738e+002	4122.5	42	8.933649e+000	0	0	0	0	0	0	4108.96	1	1	49.1849	42.3143
DATA	542	7	32	0	0	A_44_P557172	NM_177936	4375.42	222.573	6.567234e+001	7.337822e+000	126	47.5	1.343938e+001	0	0	0	0	0	0	63.9272	1	1	57.5363	49.9545
DATA	543	7	33	0	0	A_64_P118812	NM_001000512	4400.58	222.573	9.237170e+000	3.406195e+000	70	42	6.300520e+000	0	0	0	0	0	0	8.97754	1	0	65	42.6
DATA	544	7	34	0	0	A_64_P019425	NM_172035	4426	222.545	1.086100e+002	1.134679e+001	168	43	7.268784e+000	0	0	0	0	0	0	105.365	1	1	55.8519	42.0909
DATA	545	7	35	0	0	A_42_P726743	NM_001108985	4451.42	222.573	5.833708e+002	5.842986e+001	608	41	8.093136e+000	0	0	0	0	0	0	564.774	1	1	57.5363	43.1333
DATA	546	7	36	0	0	A_42_P558703	NM_001106810	4476.38	222.295	3.109029e+002	3.126480e+001	360	43.5	1.008032e+001	0	0	0	0	0	0	300.316	1	1	50.4627	45.75
DATA	547	7	37	0	0	A_42_P619806	TC590118	4502.05	222.342	3.788501e+002	3.802908e+001	433	41	6.120168e+000	0	0	0	0	0	0	365.021	1	1	49.8279	41.3514
DATA	548	7	38	0	0	A_64_P072247	XM_001055615	4527.58	222.573	7.154451e+001	7.885655e+000	131	42.5	6.755205e+000	0	0	0	0	0	0	68.7436	1	1	57.5363	43.0588
DATA	549	7	39	0	0	A_64_P104164	A_64_P104164	4552.91	222.896	1.131917e+004	1.131921e+003	11083	44	8.056788e+000	0	0	0	0	0	0	10844	1	1	46.8651	42.6129
DATA	550	7	40	0	0	A_42_P672103	NM_021770	4578.14	222.716	1.200351e+004	1.200355e+003	11396	51	1.272956e+001	0	0	0	0	0	0	11463.5	1	1	48.5334	50.0417
DATA	551	7	41	0	0	A_64_P090942	NM_001000406	4603.58	222.573	9.197176e+000	3.471843e+000	71	46	1.084175e+001	0	0	0	0	0	0	8.75376	1	0	65	44.1081
DATA	552	7	42	0	0	A_64_P149491	ENSRNOT00000025458	4629.42	222.573	4.744214e+001	5.813545e+000	109	45.5	1.330956e+001	0	0	0	0	0	0	44.9907	1	1	57.5363	47.3529
DATA	553	7	43	0	0	A_42_P552441	NR_002704	4654.12	222.616	8.033086e+003	8.033157e+002	7482.5	43	6.557964e+000	0	0	0	0	0	0	7590.08	1	1	48.5334	41.4
DATA	554	7	44	0	0	A_64_P060419	ENSRNOT00000055060	4679.91	222.935	3.398566e+000	3.386305e+000	64	43	8.746861e+000	0	0	0	0	0	0	0.457115	0	0	54.4085	43.8485
DATA	555	7	45	0	0	A_44_P161233	NM_019165	4705.5	223	3.673721e+002	3.689422e+001	413	43	1.119832e+001	0	0	0	0	0	0	344.28	1	1	54.1152	46.3333
DATA	556	7	46	66	-1	(-)3xSLv1	NegativeControl	4730.5	223	3.427328e+000	3.414612e+000	59	47	1.263574e+001	0	0	0	0	0	0	-3.78598	0	0	54.1152	47.4762
DATA	557	7	47	0	0	A_43_P12519	NM_031114	4756.01	223.083	3.861336e+003	3.861489e+002	3582	39.5	1.078600e+001	0	0	0	0	0	0	3587.09	1	1	46.8651	41.7188
DATA	558	7	48	0	0	A_44_P317600	NM_012612	4781.5	223	1.385882e+002	1.428083e+001	188.5	38	8.124038e+000	0	0	0	0	0	0	128.147	1	1	54.1152	40
DATA	559	7	49	0	0	A_64_P034166	A_64_P034166	4807	223	3.348168e+001	4.432992e+000	87	41	7.802001e+000	0	0	0	0	0	0	30.8107	1	1	54.9904	39.3939
DATA	560	7	50	0	0	A_64_P024585	NM_001109337	4832.5	223	2.811291e+001	4.793620e+000	80.5	40	1.060803e+001	0	0	0	0	0	0	25.7426	1	1	54.1152	41.303
DATA	561	7	51	0	0	A_42_P654682	NM_012724	4857.5	223	3.940832e+000	3.519280e+000	64	36.5	7.223840e+000	0	0	0	0	0	0	3.59066	1	0	65	37.9643
DATA	562	7	52	0	0	A_42_P524610	NM_001108992	4882.83	222.96	1.039718e+003	1.040312e+002	970.5	41	1.110468e+001	0	0	0	0	0	0	942.463	1	1	47.8731	41.7742
DATA	563	7	53	0	0	A_64_P046677	NM_020093	4908.5	223	1.728659e+001	3.934123e+000	77	45.5	1.176381e+001	0	0	0	0	0	0	15.5864	1	0	54.1152	48.1111
DATA	564	7	54	0	0	A_64_P042742	XM_001061779	4933.79	223.044	2.292231e+002	2.319602e+001	265.5	46	1.232561e+001	0	0	0	0	0	0	205.577	1	1	46.5243	46.9286
DATA	565	7	55	0	0	A_64_P058430	ENSRNOT00000062073	4959.6	222.929	1.920692e+001	4.056201e+000	80.5	41	8.897045e+000	0	0	0	0	0	0	17.1305	1	1	47.2035	41.25
DATA	566	7	56	0	0	A_42_P479251	NM_001108686	4984.44	223.26	4.237552e+003	4.237705e+002	3809	39	1.019342e+001	0	0	0	0	0	0	3759.16	1	1	49.5074	40.9167
DATA	567	7	57	0	0	A_42_P777329	NM_001106943	5010.09	223.386	3.686832e+002	3.704484e+001	393	43	1.116533e+001	0	0	0	0	0	0	325.231	1	1	57.259	44.2581
DATA	568	7	58	0	0	A_64_P103414	NM_001106472	5035.5	223.352	8.797851e+000	3.737465e+000	70.5	42	9.921086e+000	0	0	0	0	0	0	7.71754	1	0	57.5363	40.8065
DATA	569	7	59	0	0	A_64_P082164	A_64_P082164	5060.53	222.641	8.429273e+001	9.186692e+000	135	40.5	7.654088e+000	0	0	0	0	0	0	73.5308	1	1	44.7812	40.9667
DATA	570	7	60	0	0	A_42_P702729	NM_001107557	5086.09	222.672	9.394382e+002	9.401562e+001	893	39.5	1.002118e+001	0	0	0	0	0	0	814.858	1	1	45.1352	41.7
DATA	571	7	61	0	0	A_64_P130922	A_64_P130922	5111.62	223.158	3.080075e+002	3.102152e+001	329	43	1.126804e+001	0	0	0	0	0	0	265.659	1	1	49.8279	42.2593
DATA	572	7	62	0	0	A_42_P509843	NM_001100480	5137	223.455	4.978582e+002	4.992424e+001	484.5	41.5	7.786465e+000	0	0	0	0	0	0	427.009	1	1	55.8519	40.625
DATA	573	7	63	0	0	A_64_P110759	A_64_P110759	5162.42	223.427	4.141010e+001	5.577170e+000	96.5	42	1.032539e+001	0	0	0	0	0	0	35.3194	1	1	57.5363	42.3636
DATA	574	7	64	0	0	A_64_P006235	A_64_P006235	5187.75	223.373	6.898859e+002	6.909079e+001	652.5	40	9.299386e+000	0	0	0	0	0	0	585.181	1	1	49.1849	40.9167
DATA	575	7	65	0	0	A_44_P506064	NM_001191778	5213.45	222.672	3.900888e+001	5.430118e+000	95	38.5	7.139920e+000	0	0	0	0	0	0	32.9051	1	1	45.1352	38.5385
DATA	576	7	66	0	0	A_64_P075425	A_64_P075425	5238.63	223	4.981739e+003	4.981884e+002	4299	40.5	9.003453e+000	0	0	0	0	0	0	4180.03	1	1	48.5334	40.6071
DATA	577	7	67	0	0	A_42_P544898	NM_001108279	5264	223.455	3.580648e+001	5.233915e+000	90.5	41	1.014518e+001	0	0	0	0	0	0	29.8876	1	1	55.8519	41.6842
DATA	578	7	68	0	0	A_44_P837192	ENSRNOT00000038251	5289.82	223.214	3.864379e+001	5.446046e+000	95.5	49.5	1.073484e+001	0	0	0	0	0	0	32.0877	1	1	51.4001	48.2667
DATA	580	7	70	0	0	A_44_P325657	NM_001014007	5340.37	223.465	9.418102e+001	1.018411e+001	140	42	6.312381e+000	0	0	0	0	0	0	77.4451	1	1	47.8731	44
DATA	581	7	71	0	0	A_64_P004598	ENSRNOT00000024034	5365.1	224.295	2.564749e+002	2.594116e+001	270.5	43	9.155996e+000	0	0	0	0	0	0	209.961	1	1	44.4243	43.0323
DATA	582	7	72	0	0	A_42_P607183	XM_001081723	5390.89	223.5	6.715934e+002	6.727307e+001	607	44.5	1.120081e+001	0	0	0	1	0	0	547.301	1	1	56.9804	44.2353
DATA	584	7	74	0	0	A_42_P589190	NM_023104	5441.58	223.573	5.275619e+002	5.290325e+001	493	41	5.505379e+000	0	0	0	0	0	0	426.448	1	1	57.5363	40.6333
DATA	585	7	75	0	0	A_42_P757323	TC587630	5467	223.271	1.546100e+003	1.546606e+002	1298	42	8.620916e+000	0	0	0	0	0	0	1245.16	1	1	46.8651	41.0345
DATA	586	7	76	0	0	A_42_P688320	NM_001108569	5492.37	223.514	1.971261e+002	2.010838e+001	222	43	1.052193e+001	0	0	0	0	0	0	158.224	1	1	47.8731	44
DATA	587	7	77	0	0	A_44_P224705	NM_031002	5517.89	223.5	8.264230e+001	9.173565e+000	128	40	9.100154e+000	0	0	0	0	0	0	66.1295	1	1	56.9804	41.2069
DATA	588	7	78	0	0	A_42_P481849	NM_001100563	5543.19	223.581	8.822108e+002	8.831139e+001	709	41	8.208702e+000	0	0	0	0	0	0	704.033	1	1	49.1849	42.129
DATA	589	7	79	66	1	DarkCorner	DarkCorner	5568.11	223.6	4.016945e+000	4.002042e+000	58	40	9.077994e+000	0	0	0	0	0	0	-0.42927	0	0	42.5954	39.8824
DATA	590	7	80	66	1	DarkCorner	DarkCorner	5594.11	223.5	4.025036e+000	4.010103e+000	57	40	6.953304e+000	0	0	0	0	0	0	-3.83829	0	0	56.9804	38.5714
DATA	591	7	81	66	1	DarkCorner	DarkCorner	5619.86	223.747	4.031231e+000	4.016275e+000	57.5	43	1.030430e+001	0	0	0	0	0	0	-2.9557	0	0	49.8279	42.3514
DATA	592	7	82	66	1	DarkCorner	DarkCorner	5644.41	224.141	4.035384e+000	4.020413e+000	53	35.5	7.303565e+000	0	0	0	0	0	0	-6.90813	0	0	44.7812	36.4722
DATA	593	7	83	66	1	DarkCorner	DarkCorner	5670.66	223.886	4.038057e+000	4.023075e+000	61.5	37.5	8.130223e+000	0	0	0	0	0	0	-0.155371	0	0	46.8651	36.7857
DATA	594	7	84	66	1	DarkCorner	DarkCorner	5696.16	223.551	4.038624e+000	4.023641e+000	54	38	1.064581e+001	0	0	0	0	0	0	-2.95368	0	0	47.2035	40
DATA	595	7	85	66	1	DarkCorner	DarkCorner	5721.11	223.63	4.036997e+000	4.042077e+000	63.5	39.5	9.269247e+000	0	0	0	0	0	0	3.18622	0	0	50.4627	38.8966
DATA	596	8	1	66	1	DarkCorner	DarkCorner	3600.72	229.082	3.470361e+000	3.458036e+000	61	40	8.545241e+000	0	0	0	0	0	0	0.568653	0	0	44.4243	40.9545
DATA	597	8	2	66	1	DarkCorner	DarkCorner	3626.33	229.5	6.944494e+000	3.512552e+000	68	45.5	9.296895e+000	0	0	0	0	0	0	6.42653	1	0	57.5363	45.8529
DATA	598	8	3	66	1	DarkCorner	DarkCorner	3650.75	229.677	3.442682e+000	3.429910e+000	60	41	8.418196e+000	0	0	0	0	0	0	-0.16805	0	0	45.1352	41.425
DATA	599	8	4	66	1	DarkCorner	DarkCorner	3676.89	229.5	3.428745e+000	3.416024e+000	57.5	42	7.308825e+000	0	0	0	0	0	0	-3.44156	0	0	56.9804	42.4324
DATA	600	8	5	66	1	DarkCorner	DarkCorner	3702.42	229.427	3.415496e+000	3.402824e+000	55	44	8.623216e+000	0	0	0	0	0	0	-4.8485	0	0	57.5363	44.2121
DATA	601	8	6	66	1	DarkCorner	DarkCorner	3727.58	229.427	3.402825e+000	3.390200e+000	56	47.5	1.131941e+001	0	0	0	0	0	0	-5.36462	0	0	57.5363	50.5
DATA	602	8	7	66	1	DarkCorner	DarkCorner	3753.11	229.5	3.390405e+000	3.384712e+000	64	47.5	1.025362e+001	0	0	0	0	0	0	2.03559	0	0	56.9804	48.3667
DATA	603	8	8	0	0	A_44_P487081	NM_001033951	3778.11	229.471	3.816219e+002	3.831036e+001	425	43	1.020617e+001	0	0	0	0	0	0	361.242	1	1	47.8731	44.3077
DATA	604	8	9	0	0	A_64_P054403	NM_001170340	3803.89	229.5	3.181605e+002	3.199242e+001	369	45	9.000717e+000	0	0	0	0	0	0	302.204	1	1	56.9804	46.2903
DATA	605	8	10	0	0	A_44_P665685	NM_001109325	3829.42	229.573	1.129456e+001	3.529367e+000	74	46	8.190442e+000	0	0	0	0	0	0	10.763	1	0	57.5363	46.4
DATA	606	8	11	0	0	A_42_P531684	NM_001014215	3854.23	228.758	1.156853e+002	1.203930e+001	169.5	42	9.995110e+000	0	0	0	0	0	0	110.572	1	1	45.835	44.0313
DATA	607	8	12	0	0	A_42_P722904	ENSRNOT00000006525	3879.73	229.3	1.018077e+003	1.018620e+002	1018	41	7.404969e+000	0	0	0	0	0	0	975.937	1	1	47.2035	40.6316
DATA	608	8	13	0	0	A_42_P514057	NM_031839	3905.25	229.662	6.321995e+002	6.330680e+001	673.5	39	9.572642e+000	0	0	0	1	0	0	607.705	1	1	45.1352	41.2759
DATA	609	8	14	0	0	A_64_P087459	A_64_P087459	3930.67	229.5	4.649327e+004	4.649328e+003	44328.5	44	1.082704e+001	0	0	0	0	0	0	44806.6	1	1	57.5363	44.4688
DATA	610	8	15	0	0	A_42_P581060	NM_001108722	3955.81	229.481	5.826270e+003	5.826363e+002	5504	43.5	1.041882e+001	0	0	0	0	0	0	5628.12	1	1	49.8279	46
DATA	611	8	16	0	0	A_42_P658220	NM_001109598	3981.58	229.573	1.040667e+003	1.041187e+002	1051	45	1.380144e+001	0	0	0	0	0	0	1007.5	1	1	57.5363	48.6875
DATA	612	8	17	0	0	A_42_P758454	NM_001108101	4007	229.545	2.113419e+002	2.138794e+001	253	43.5	1.051687e+001	0	0	0	1	0	0	205.012	1	1	55.8519	45.2692
DATA	613	8	18	0	0	A_64_P140956	NM_001013141	4032.3	229.266	1.239940e+002	1.282563e+001	177	43	1.027184e+001	0	0	0	0	0	0	120.493	1	1	50.4627	44.9474
DATA	614	8	19	0	0	A_42_P508984	NM_001007729	4057.58	229.573	3.665063e+002	3.679657e+001	415	44	8.437269e+000	0	0	0	0	0	0	356.711	1	1	57.5363	43
DATA	615	8	20	0	0	A_42_P619008	NM_001013079	4082.89	229.352	2.373798e+003	2.374023e+002	2288	41	7.808313e+000	0	0	0	0	0	0	2313.45	1	1	47.8731	40.8286
DATA	616	8	21	0	0	A_64_P058351	NM_017101	4108.58	229.573	8.957818e+004	8.957818e+003	87266	40	1.232543e+001	0	0	0	0	0	0	87399.9	1	1	57.5363	42.871
DATA	617	8	22	0	0	A_64_P083800	XM_001058776	4134.14	229.292	1.490705e+001	3.587279e+000	76	42	1.209118e+001	0	0	0	0	0	0	14.5577	1	0	45.835	45.4324
DATA	618	8	23	0	0	A_64_P028088	NM_001106073	4159.5	229.648	3.139001e+002	3.155892e+001	372	42	7.643734e+000	0	0	0	0	0	0	306.746	1	1	57.5363	43.52
DATA	619	8	24	0	0	A_44_P105441	ENSRNOT00000042202	4184.63	230.265	6.990569e+003	6.990645e+002	7058	52.5	1.038416e+001	0	0	0	0	0	0	6834.17	1	1	46.5243	52.8571
DATA	620	8	25	0	0	A_42_P675802	NM_145777	4210.42	229.573	9.585462e+002	9.590999e+001	984.5	49	1.480026e+001	0	0	0	0	0	0	937.292	1	1	57.5363	50.381
DATA	621	8	26	0	0	A_64_P018525	ENSRNOT00000027134	4235.23	229.729	4.310759e+002	4.323059e+001	480	43.5	1.416350e+001	0	0	0	0	0	0	421.502	1	1	46.8651	48.7308
DATA	622	8	27	0	0	A_42_P749382	NM_001106731	4260.64	229.742	4.136427e+003	4.136555e+002	4013	46	1.349572e+001	0	0	0	0	0	0	4043.46	1	1	46.1809	47.0435
DATA	623	8	28	0	0	A_44_P316364	NM_001077675	4285.84	229.464	1.113762e+001	3.446240e+000	72	46	8.728337e+000	0	0	0	0	0	0	10.8818	1	0	42.9674	45.4643
DATA	624	8	29	0	0	A_64_P143596	ENSRNOT00000060139	4311.69	229.986	8.830928e+001	9.414756e+000	148	43	9.811616e+000	0	0	0	0	0	0	86.2153	1	1	47.2035	43.037
DATA	625	8	30	0	0	A_42_P468723	NM_001191689	4336.91	229.896	3.174707e+002	3.191472e+001	365	40	6.730128e+000	0	0	0	0	0	0	309.639	1	1	46.8651	40.1935
DATA	626	8	31	0	0	A_42_P533792	NM_001106575	4362.28	229.905	4.944527e+003	4.944636e+002	4778	45	9.716755e+000	0	0	0	0	0	0	4816.64	1	1	48.8603	45.3125
DATA	627	8	32	0	0	A_43_P16773	XM_217313	4387.56	229.973	2.278733e+002	2.302158e+001	284	42	5.888808e+000	0	0	0	0	0	0	221.657	1	1	48.5334	42.2963
DATA	628	8	33	0	0	A_42_P765830	NM_001106426	4413	229.797	7.019733e+003	7.019810e+002	6930	43	7.104029e+000	0	0	0	0	0	0	6816.62	1	1	46.8651	42.9429
DATA	629	8	34	0	0	A_43_P15073	ENSRNOT00000030771	4438.5	230	6.159429e+001	6.981951e+000	123.5	41	8.280019e+000	0	0	0	0	0	0	59.6962	1	1	54.1152	42.0606
DATA	630	8	35	0	0	A_42_P538527	NM_001108885	4463.91	229.597	2.304750e+002	2.328183e+001	280	44.5	9.230136e+000	0	0	0	0	0	0	222.889	1	1	45.835	45.3333
DATA	631	8	36	0	0	A_64_P037130	A_64_P037130	4489.58	230.564	3.315106e+000	3.303025e+000	64	42	7.890882e+000	0	0	0	0	0	0	0.366355	0	0	40.6843	43.125
DATA	632	8	37	0	0	A_44_P536115	NM_023957	4514.44	230.027	1.777588e+003	1.777897e+002	1742	40	6.026108e+000	0	0	0	0	0	0	1710.55	1	1	48.5334	40.7742
DATA	633	8	38	0	0	A_43_P11800	NM_017059	4540.42	230.427	2.240344e+002	2.264823e+001	281.5	43	7.410531e+000	0	0	0	0	0	0	214.961	1	1	57.5363	42.7143
DATA	634	8	39	0	0	A_64_P004922	NM_001191924	4565.49	230.041	1.623611e+003	1.623953e+002	1601	49	1.223072e+001	0	0	0	0	0	0	1553.17	1	1	48.5334	46.7619
DATA	635	8	40	0	0	A_64_P145058	NM_001107951	4591.09	230.386	3.331757e+002	3.348475e+001	380.5	45	1.101595e+001	0	0	0	0	0	0	317.675	1	1	57.259	44.2683
DATA	636	8	41	0	0	A_64_P075372	A_64_P075372	4616.5	230.352	3.099193e+001	4.566283e+000	92	41	1.170510e+001	0	0	0	0	0	0	29.4477	1	1	57.5363	42.2051
DATA	637	8	42	0	0	A_64_P118792	NM_001107034	4641.58	230.427	1.896665e+001	3.863284e+000	83	42.5	8.275153e+000	0	0	0	0	0	0	17.9565	1	1	65	44.0667
DATA	638	8	43	0	0	A_42_P469685	NM_001100532	4667.19	229.906	1.548915e+003	1.549283e+002	1535	44	8.956464e+000	0	0	0	0	0	0	1460.72	1	1	45.835	45.1944
DATA	639	8	44	0	0	A_42_P759822	NM_001109673	4692.25	229.889	2.409620e+002	2.433382e+001	286	42	9.637153e+000	0	0	0	0	0	0	226.336	1	1	45.1352	44.2333
DATA	640	8	45	0	0	A_64_P014687	NM_012650	4717.9	230.103	6.857617e+003	6.857702e+002	6763.5	55.5	3.226024e+001	0	0	0	0	1	0	6414.03	1	1	46.8651	66.3667
DATA	641	8	46	0	0	A_43_P18505	NM_001012010	4743.45	230.288	7.355601e+001	8.112574e+000	133	45	1.114277e+001	0	0	0	0	0	0	68.495	1	1	46.1809	45.8065
DATA	642	8	47	0	0	A_43_P12580	NM_031548	4768.58	230.427	2.154289e+002	2.181538e+001	268	42	1.390854e+001	0	0	0	0	0	0	199.706	1	1	57.5363	44.6875
DATA	643	8	48	0	0	A_64_P052980	NM_001014786	4794.42	230.427	2.740196e+001	4.408745e+000	87	40	7.038809e+000	0	0	0	0	0	0	25.2809	1	1	57.5363	40.8
DATA	644	8	49	0	0	A_64_P397764	ENSRNOT00000028709	4819.58	230.427	3.002654e+002	3.022642e+001	340.5	40.5	9.487136e+000	0	0	0	0	0	0	275.696	1	1	57.5363	40.8333
DATA	645	8	50	0	0	A_64_P048408	NM_001008858	4844.76	230.029	1.205332e+002	1.254773e+001	170	40	1.100029e+001	0	0	0	0	0	0	110.125	1	1	46.8651	42.1613
DATA	647	8	52	0	0	A_64_P059500	ENSRNOT00000043917	4895.67	230.5	1.174883e+001	3.714411e+000	73	50	1.475495e+001	0	0	0	0	0	0	10.6242	1	0	57.5363	49.9688
DATA	648	8	53	0	0	A_64_P220198	AW917371	4921.33	230.5	1.457701e+001	3.830829e+000	77	46	1.274359e+001	0	0	0	0	0	0	13.1112	1	0	65	48.5517
DATA	649	8	54	0	0	A_64_P109764	NM_001007756	4946.5	230.5	2.445523e+002	2.471323e+001	284	40	8.503787e+000	0	0	0	0	0	0	218.788	1	1	49.1849	41.4242
DATA	650	8	55	0	0	A_64_P142685	NM_001130498	4971.89	230.5	1.779687e+001	3.998982e+000	81	41	8.334530e+000	0	0	0	0	0	0	15.8352	1	0	56.9804	41.8148
DATA	651	8	56	0	0	A_44_P395709	NM_134366	4996.82	230.597	1.020811e+003	1.021445e+002	957	39.5	1.075944e+001	0	0	0	0	0	0	903.381	1	1	47.8731	42.4
DATA	652	8	57	0	0	A_64_P165071	NM_001110165	5022.61	230.271	4.652168e+003	4.652309e+002	4165.5	44	1.292924e+001	0	0	0	0	0	0	4093.71	1	1	47.5395	45.3704
DATA	653	8	58	0	0	A_64_P009147	ENSRNOT00000042587	5048.17	230.064	3.831677e+001	5.286115e+000	97	40.5	8.617077e+000	0	0	0	0	0	0	33.5272	1	1	49.5074	40.2333
DATA	654	8	59	0	0	A_42_P647072	NM_178102	5073.34	230.243	8.480308e+002	8.488211e+001	814	40	7.627202e+000	0	0	0	0	0	0	737.908	1	1	48.8603	40.1429
DATA	655	8	60	0	0	A_64_P125585	XM_001063000	5098.89	230.5	1.549252e+001	3.995290e+000	78	38	8.659657e+000	0	0	0	0	0	0	13.4047	1	0	65	38.9
DATA	656	8	61	0	0	A_42_P610317	NM_001108225	5124	230.5	3.066070e+003	3.066294e+002	2592	40.5	8.786413e+000	0	0	0	0	0	0	2638.2	1	1	48.5334	39.3571
DATA	657	8	62	0	0	A_42_P755831	NM_152935	5149.44	230.611	1.062435e+004	1.062441e+003	8868	40.5	7.983912e+000	0	0	0	0	0	0	9090.73	1	1	48.2044	39.1667
DATA	659	8	64	0	0	A_44_P386375	NM_053842	5200.39	230.722	4.002062e+002	4.019736e+001	399	37	7.788423e+000	0	0	0	0	0	0	338.674	1	1	48.5334	37.3529
DATA	660	8	65	0	0	A_43_P15565	NM_023953	5225.86	230.593	1.539858e+001	4.086976e+000	75	40.5	9.182943e+000	0	0	0	0	0	0	12.9606	1	0	56.9804	39.8667
DATA	661	8	66	0	0	A_42_P456701	NM_001009697	5250.76	230.024	5.057275e+002	5.071574e+001	476	39	9.530236e+000	0	0	0	0	0	0	423.437	1	1	36.1258	39.5556
DATA	662	8	67	0	0	A_43_P20388	ENSRNOT00000061333	5276.37	230.589	5.763889e+002	5.776570e+001	514.5	44	1.118618e+001	0	0	0	0	0	0	480.098	1	1	48.5334	45.5455
DATA	663	8	68	0	0	A_44_P572504	TC585660	5301.87	230.757	3.432624e+002	3.454090e+001	338	41	8.376949e+000	0	0	0	0	0	0	284.474	1	1	46.5243	43.1071
DATA	664	8	69	0	0	A_64_P059964	NM_001013858	5327.37	230.573	1.289571e+003	1.290150e+002	1092	42	7.895406e+000	0	0	0	0	0	0	1063.46	1	1	49.1849	41.1379
DATA	665	8	70	0	0	A_44_P1056293	ENSRNOT00000022862	5352.66	230.878	1.428699e+003	1.429226e+002	1184	42	7.950339e+000	0	0	0	0	0	0	1172.7	1	1	48.8603	45.45
DATA	666	8	71	0	0	A_64_P133276	NM_001107464	5378.38	231	4.495390e+002	4.512274e+001	429	45	1.056012e+001	0	0	0	0	0	0	367.305	1	1	48.5334	46.129
DATA	667	8	72	0	0	A_42_P667782	NM_001009673	5403.38	231	6.211929e+002	6.224262e+001	549	48	9.396074e+000	0	0	0	0	0	0	505.413	1	1	48.5334	47.7
DATA	668	8	73	0	0	A_64_P023624	A_64_P023624	5429.06	230.687	1.958959e+002	1.998042e+001	226	43	1.073396e+001	0	0	0	0	0	0	158.727	1	1	45.835	46.697
DATA	669	8	74	0	0	A_64_P110130	NM_001106172	5454.64	230.8	6.526385e+002	6.538313e+001	599	41	5.679635e+000	0	0	0	0	0	0	526.789	1	1	49.5074	40.2703
DATA	670	8	75	0	0	A_64_P087728	XM_001078778	5479.59	230.667	8.022751e+001	8.947446e+000	129	41	8.290064e+000	0	0	0	0	0	0	64.5329	1	1	44.7812	41.1364
DATA	671	8	76	0	0	A_44_P475356	NM_001177823	5505.29	230.754	1.284106e+002	1.344200e+001	163	41.5	1.083631e+001	0	0	0	0	0	0	102.955	1	1	45.1352	43.9
DATA	672	8	77	0	0	A_42_P560984	NM_001109179	5530.66	230.877	4.787560e+003	4.787726e+002	3889	41	8.455683e+000	0	0	0	0	0	0	3827.5	1	1	48.5334	41.963
DATA	673	8	78	0	0	A_42_P566906	NM_001006966	5555.87	230.9	1.343427e+003	1.344021e+002	1134	41.5	7.675836e+000	0	0	0	1	0	0	1071.33	1	1	46.8651	39.9615
DATA	674	8	79	66	1	DarkCorner	DarkCorner	5581.5	231	4.019238e+000	4.004326e+000	58	41	9.158495e+000	0	0	0	0	0	0	-1.96442	0	0	54.1152	39.8438
DATA	675	8	80	66	1	DarkCorner	DarkCorner	5606.5	231	4.026157e+000	4.011219e+000	55	43	8.234971e+000	0	0	0	0	0	0	-5.56721	0	0	54.1152	41.881
DATA	676	8	81	66	1	DarkCorner	DarkCorner	5632.39	231.069	4.031544e+000	4.016586e+000	56	43	1.082769e+001	0	0	0	0	0	0	-4.58592	0	0	53.8203	42.8966
DATA	677	8	82	66	1	DarkCorner	DarkCorner	5657.67	231.067	4.034984e+000	4.020014e+000	55	36	6.563921e+000	0	0	0	0	0	0	-4.05374	0	0	43.7019	36.5333
DATA	678	8	83	66	1	DarkCorner	DarkCorner	5683.45	231.242	4.036454e+000	4.021479e+000	54	39	9.465650e+000	0	0	0	0	0	0	-3.86442	0	0	43.3362	39.2069
DATA	679	8	84	66	1	DarkCorner	DarkCorner	5708.24	231.452	4.035856e+000	4.020882e+000	58	41	9.543064e+000	0	0	0	0	0	0	-1.70462	0	0	43.3362	41.4848
DATA	680	8	85	66	1	DarkCorner	DarkCorner	5733.69	231.689	4.532579e+000	4.043606e+000	61	37	8.354057e+000	0	0	0	0	0	0	3.59437	1	0	48.2044	37.0477
DATA	681	9	1	66	1	DarkCorner	DarkCorner	3588.11	236.5	3.476639e+000	3.468147e+000	62	36	7.929916e+000	0	0	0	0	0	0	1.60797	0	0	65	36.4611
DATA	682	9	2	66	1	DarkCorner	DarkCorner	3613.5	236.5	3.462447e+000	3.460362e+000	62	46	8.619675e+000	0	0	0	0	0	0	2.51881	0	0	57.5363	45.9189
DATA	683	9	3	66	1	DarkCorner	DarkCorner	3639.22	236.306	3.448350e+000	3.435557e+000	59	41	8.370868e+000	0	0	0	0	0	0	-1.18745	0	0	47.5395	42
DATA	684	9	4	66	1	DarkCorner	DarkCorner	3663.46	236.808	3.435285e+000	3.422540e+000	58	40	8.369660e+000	0	0	0	0	0	0	-0.720821	0	0	50.1463	40.9474
DATA	685	9	5	66	1	DarkCorner	DarkCorner	3689.58	236.573	3.421618e+000	3.408923e+000	59	41	6.947024e+000	0	0	0	0	0	0	-2.11361	0	0	57.5363	41.7353
DATA	686	9	6	66	1	DarkCorner	DarkCorner	3715	236.545	3.408683e+000	3.396037e+000	60.5	44	7.772404e+000	0	0	0	0	0	0	-2.20742	0	0	65	46.4444
DATA	687	9	7	66	1	DarkCorner	DarkCorner	3740.42	236.573	3.396158e+000	3.383558e+000	58	44	8.274750e+000	0	0	0	0	0	0	-1.98687	0	0	57.5363	44.2059
DATA	688	9	8	0	0	A_44_P195306	NM_019377	3765.44	236.734	1.317456e+004	1.317460e+003	12043	47	1.114495e+001	0	0	0	0	0	0	12450.5	1	1	50.7771	45.28
DATA	689	9	9	0	0	A_44_P653240	NM_001202552	3790.94	236.611	3.409242e+002	3.425760e+001	371.5	44.5	9.190879e+000	0	0	0	0	0	0	323.3	1	1	48.2044	46.5263
DATA	690	9	10	0	0	A_64_P012778	ENSRNOT00000038310	3816.5	236.648	3.821432e+000	3.370726e+000	66	47	1.130752e+001	0	0	0	0	0	0	3.6359	1	0	57.5363	50.12
DATA	691	9	11	0	0	A_43_P11430	NM_001130503	3841.69	236.611	3.330473e+002	3.347165e+001	368	42	1.032327e+001	0	0	0	0	0	0	317.868	1	1	48.2044	43.6452
DATA	692	9	12	0	0	A_44_P225353	NM_001009678	3866.99	236.69	2.837616e+002	2.857073e+001	324	41.5	7.293459e+000	0	0	0	0	0	0	271.635	1	1	47.2035	41.0238
DATA	693	9	13	0	0	A_64_P055231	NM_001106620	3892.56	236.74	5.462332e+002	5.472407e+001	580	38.5	6.235235e+000	0	0	0	0	0	0	524.376	1	1	49.5074	37.8667
DATA	694	9	14	0	0	A_42_P540950	NM_001009541	3917.92	236.829	5.219024e+002	5.229512e+001	558.5	43	8.901609e+000	0	0	0	0	0	0	502.344	1	1	47.8731	44.3636
DATA	695	9	15	0	0	A_64_P135888	ENSRNOT00000029916	3943.5	237	3.482986e+000	3.320587e+000	65	44	1.060656e+001	0	0	0	0	0	0	3.36078	1	0	54.1152	44.4706
DATA	696	9	16	0	0	A_64_P086448	NM_001008819	3968.54	237.026	7.877775e+001	8.539064e+000	140	43	9.530145e+000	0	0	0	0	0	0	76.184	1	1	49.8279	45.0968
DATA	697	9	17	0	0	A_42_P701779	NM_001108048	3994.5	237	1.006390e+003	1.006927e+002	1008	42	8.247645e+000	0	0	0	0	0	0	975.32	1	1	54.1152	43.9032
DATA	698	9	18	0	0	A_44_P409965	ENSRNOT00000036078	4018.96	236.893	2.979465e+001	4.432679e+000	93	45	1.601142e+001	0	0	0	0	0	0	28.9269	1	1	46.8651	49.9677
DATA	699	9	19	0	0	A_44_P474037	NM_052807	4045	236.916	1.112265e+002	1.159517e+001	169	41	1.066377e+001	0	0	0	0	0	0	108.172	1	1	46.8651	44.1818
DATA	700	9	20	0	0	A_64_P156985	NM_001000385	4070.5	237	3.283811e+000	3.273184e+000	63	43	8.440660e+000	0	0	0	0	0	0	0.983013	0	0	54.1152	43.7568
DATA	701	9	21	0	0	A_42_P635228	NM_001107651	4095.91	237.065	5.317467e+001	6.241211e+000	110.5	40	7.495959e+000	0	0	0	0	0	0	51.8532	1	1	65	41.2424
DATA	702	9	22	0	0	A_64_P240508	ENSRNOT00000018000	4121.15	237.125	1.698211e+002	1.729300e+001	224.5	46	1.169069e+001	0	0	0	0	0	0	165.767	1	1	46.8651	47.8788
DATA	703	9	23	0	0	A_64_P026509	NM_020656	4146.5	237	6.179500e+001	6.987526e+000	121.5	40	8.135632e+000	0	0	0	0	0	0	60.3667	1	1	54.1152	42.1333
DATA	704	9	24	0	0	A_42_P570241	NM_177928	4171.74	237.164	2.650286e+002	2.670261e+001	322.5	52	9.600903e+000	0	0	0	0	0	0	259.045	1	1	48.2044	53.0345
DATA	706	9	26	0	0	A_64_P032893	TC597420	4222.63	236.735	1.730207e+004	1.730210e+003	16808	43	1.630145e+001	0	0	0	0	0	0	16918.4	1	1	46.5243	50.7917
DATA	707	9	27	0	0	A_64_P043605	NM_001024799	4247.88	236.716	2.093191e+003	2.093445e+002	2045	47	1.611099e+001	0	0	0	0	0	0	2046.47	1	1	45.835	49.4444
DATA	708	9	28	0	0	A_64_P095890	NM_019337	4273.43	236.761	6.612883e+003	6.612963e+002	6564	49	1.801464e+001	0	0	0	0	0	0	6462.76	1	1	46.5243	50.7931
DATA	709	9	29	0	0	A_42_P513145	NM_001107288	4298.85	236.846	2.930540e+002	2.948644e+001	348	48	1.019943e+001	0	0	0	0	0	0	286.222	1	1	46.1809	47.1818
DATA	710	9	30	0	0	A_64_P122317	NM_001108031	4324.05	237.452	9.805256e+001	1.033465e+001	159	43	9.588701e+000	0	0	0	0	0	0	95.6847	1	1	48.5334	42.5455
DATA	711	9	31	0	0	A_64_P065492	NM_001109101	4349.58	237.427	2.373044e+001	4.039411e+000	87	42	8.257343e+000	0	0	0	0	0	0	23.1318	1	1	57.5363	42.9394
DATA	712	9	32	0	0	A_64_P129273	NM_001105871	4375.42	237.427	3.416168e+001	4.731267e+000	98	45	8.504268e+000	0	0	0	0	0	0	33.2545	1	1	57.5363	45
DATA	713	9	33	0	0	A_64_P050748	NM_181824	4400.74	237.667	2.297833e+001	4.003555e+000	88	43	5.305483e+000	0	0	0	0	0	0	22.333	1	1	41.4593	42.9259
DATA	714	9	34	0	0	A_42_P689755	NM_053306	4426	237.455	4.958423e+001	5.947534e+000	112.5	43	9.059174e+000	0	0	0	0	0	0	48.1049	1	1	55.8519	43.1471
DATA	715	9	35	0	0	A_64_P039586	TC635481	4451.42	237.427	9.184533e+001	9.756384e+000	151	43	9.970221e+000	0	0	0	0	0	0	88.9233	1	1	57.5363	44.0303
DATA	716	9	36	0	0	A_64_P083474	NM_001134731	4476.7	237.1	2.987120e+003	2.987302e+002	2861.5	44	8.727615e+000	0	0	0	0	0	0	2885.55	1	1	47.2035	45.9667
DATA	718	9	38	0	0	A_42_P763553	NM_001107486	4527.38	237.486	8.114814e+001	8.766091e+000	140.5	40	7.131066e+000	0	0	0	0	0	0	77.9827	1	1	48.2044	40.1714
DATA	719	9	39	0	0	A_44_P151513	NM_001000901	4552.89	237.5	9.482197e+000	3.458075e+000	71	45	8.732643e+000	0	0	0	0	0	0	9.08549	1	0	56.9804	45.7917
DATA	720	9	40	0	0	A_42_P460204	ENSRNOT00000020886	4577.74	237.333	2.211060e+002	2.236082e+001	261	45	1.081317e+001	0	0	0	0	0	0	211.204	1	1	51.4001	44.9643
DATA	721	9	41	0	0	A_44_P218147	NM_001013432	4603.67	237.5	2.478807e+001	4.165131e+000	86.5	40	1.239159e+001	0	0	0	0	0	0	23.5972	1	1	57.5363	40.6389
DATA	722	9	42	0	0	A_42_P554722	NM_001099758	4629.06	237.3	3.756818e+003	3.756968e+002	3539	40.5	1.137733e+001	0	0	0	0	0	0	3563.63	1	1	46.8651	41.9333
DATA	723	9	43	0	0	A_44_P135450	XM_223143	4654.5	237.5	1.914801e+002	1.944261e+001	250	43	5.857405e+000	0	0	0	0	0	0	180.953	1	1	57.5363	42.6333
DATA	724	9	44	0	0	A_64_P107329	NM_001013207	4679.69	237.338	4.284968e+003	4.285102e+002	4032.5	41.5	8.705043e+000	0	0	0	0	0	0	4033.59	1	1	48.5334	43.2222
DATA	725	9	45	0	0	A_64_P116219	NM_001004085	4704.81	237.466	6.409308e+003	6.409398e+002	6077.5	44	8.524642e+000	0	0	0	0	0	0	6008.8	1	1	48.2044	44.1481
DATA	726	9	46	0	0	A_44_P147396	NM_001191744	4730.58	237.573	3.407545e+001	4.823290e+000	92.5	47	1.202220e+001	0	0	0	0	0	0	31.8074	1	1	65	49
DATA	727	9	47	0	0	A_44_P975743	TC626448	4755.82	237.6	9.229946e+002	9.236313e+001	895	44	1.027095e+001	0	0	0	0	0	0	857.752	1	1	50.4627	44.3226
DATA	728	9	48	0	0	A_42_P728472	NM_001007600	4781.5	237.5	7.352797e+003	7.352877e+002	6791	40.5	1.134946e+001	0	0	0	0	0	0	6801.24	1	1	57.5363	43.5
DATA	729	9	49	0	0	A_64_P130139	NM_013181	4806.63	237.288	6.609416e+003	6.609506e+002	6022	44	8.797251e+000	0	0	0	0	0	0	6084.86	1	1	48.5334	42.9655
DATA	730	9	50	0	0	A_42_P481087	XM_232226	4832.11	237.648	5.924766e+002	5.934966e+001	593.5	45	1.135102e+001	0	0	0	0	0	0	542.787	1	1	47.8731	46.1563
DATA	731	9	51	0	0	A_44_P102465	NM_001000424	4857.58	237.573	3.598405e+001	5.016798e+000	93	44	1.224725e+001	0	0	0	0	0	0	32.8004	1	1	57.5363	44.069
DATA	732	9	52	0	0	A_64_P082557	ENSRNOT00000029274	4883	237.545	2.206374e+001	4.149002e+000	86	49	1.274675e+001	0	0	0	0	0	0	20.0085	1	1	55.8519	50.2903
DATA	733	9	53	0	0	A_64_P064873	XM_228599	4908.5	237.648	5.563028e+001	6.589690e+000	111	50	1.442571e+001	0	0	0	0	0	0	50.1835	1	1	57.5363	50.3793
DATA	734	9	54	0	0	A_64_P042298	A_64_P042298	4933.58	237.573	5.718682e+001	6.731444e+000	112.5	42	1.274345e+001	0	0	0	0	0	0	51.3164	1	1	57.5363	44.8667
DATA	735	9	55	0	0	A_44_P286341	ENSRNOT00000038519	4959.42	237.573	1.458711e+001	3.857018e+000	76	41	7.588992e+000	0	0	0	0	0	0	13.0178	1	0	57.5363	40.9697
DATA	736	9	56	0	0	A_44_P994614	NM_001106646	4984.48	237.853	1.764429e+004	1.764433e+003	15614.5	40	8.787870e+000	0	0	0	0	0	0	15661.2	1	1	49.8279	40.32
DATA	737	9	57	0	0	A_64_P098354	XM_001066867	5010.09	237.614	1.232499e+002	1.284280e+001	171.5	42	1.067481e+001	0	0	0	0	0	0	108.787	1	1	57.259	42.8611
DATA	738	9	58	0	0	A_64_P117373	NM_001107752	5035.33	237.918	6.836102e+001	7.740117e+000	124	41.5	9.391542e+000	0	0	0	0	0	0	60.0065	1	1	48.8603	40.1429
DATA	739	9	59	0	0	A_64_P111395	ENSRNOT00000025391	5060.61	237.931	1.859040e+002	1.894539e+001	229	40	7.823887e+000	0	0	0	0	0	0	162.277	1	1	53.8203	40.1892
DATA	740	9	60	0	0	A_64_P059465	XM_229201	5086.5	238	7.579785e+000	3.748707e+000	69.5	40	8.965819e+000	0	0	0	0	0	0	6.5787	1	0	54.1152	40.9118
DATA	741	9	61	0	0	A_64_P010852	NM_001106214	5111.44	237.792	8.728937e+003	8.729015e+002	7283	42	9.210888e+000	0	0	0	0	0	0	7534.38	1	1	49.1849	41.9259
DATA	742	9	62	0	0	A_64_P024967	NM_001008359	5137.06	238.114	6.758580e+001	7.711057e+000	118.5	39	8.027769e+000	0	0	0	0	0	0	58.0096	1	1	46.8651	38.1515
DATA	743	9	63	0	0	A_44_P278418	NM_012538	5162.53	238.292	1.136348e+001	3.902229e+000	72	42	9.589985e+000	0	0	0	0	0	0	9.69932	1	0	47.5395	42.303
DATA	744	9	64	0	0	A_44_P821875	NM_001009500	5187.91	238.323	3.856829e+001	5.381934e+000	92.5	37	9.063786e+000	0	0	0	0	0	0	32.7397	1	1	45.835	39.0938
DATA	745	9	65	0	0	A_64_P066737	A_64_P066737	5213.33	237.638	3.865369e+001	5.402431e+000	94	40	8.043325e+000	0	0	0	0	0	0	32.633	1	1	46.8651	39.4848
DATA	746	9	66	0	0	A_64_P003943	TC616650	5238.7	238.224	4.781558e+001	6.104122e+000	104	39.5	9.670139e+000	0	0	0	0	0	0	40.1545	1	1	45.835	39.9412
DATA	747	9	67	0	0	A_64_P047035	ENSRNOT00000066263	5264.46	237.908	9.873368e+000	3.940309e+000	71	38	9.175964e+000	0	0	0	0	0	0	8.24739	1	0	44.7812	38.9143
DATA	748	9	68	0	0	A_64_P113867	NM_001077201	5289.28	238.095	1.769055e+002	1.810117e+001	212	43.5	1.058372e+001	0	0	0	0	0	0	147.038	1	1	48.8603	45.7188
DATA	749	9	69	0	0	A_64_P013758	NM_012582	5314.78	237.89	1.136878e+003	1.137530e+002	1000	42	6.829726e+000	0	0	0	0	0	0	940.226	1	1	47.8731	41.6129
DATA	750	9	70	0	0	A_44_P303982	NM_001106381	5340.39	238.069	4.331587e+001	5.809571e+000	97	42	6.922650e+000	0	0	0	0	0	0	35.6508	1	1	53.8203	42.6667
DATA	751	9	71	0	0	A_64_P048601	A_64_P048601	5365.38	238.237	3.863866e+002	3.883389e+001	381.5	47	1.088623e+001	0	0	0	0	0	0	316.576	1	1	49.1849	47.52
DATA	752	9	72	0	0	A_44_P304880	NM_001014261	5390.91	238.386	6.006449e+001	7.164954e+000	113	47.5	1.150092e+001	0	0	0	0	0	0	48.9952	1	1	65	49.0667
DATA	753	9	73	0	0	A_64_P096767	ENSRNOT00000039549	5416.42	238.427	3.937322e+000	3.930586e+000	65	47	1.131655e+001	0	0	0	0	0	0	2.01958	0	0	57.5363	48.4242
DATA	754	9	74	0	0	A_43_P21810	NM_001025000	5441.27	238.513	2.415545e+001	4.619657e+000	81	41	8.948723e+000	0	0	0	0	0	0	19.5461	1	1	50.4627	42.7188
DATA	756	9	76	0	0	A_64_P084976	NM_001008916	5492.83	239.312	3.980534e+000	3.965765e+000	58.5	44	8.516888e+000	0	0	0	0	0	0	-3.19226	0	0	48.5334	43.3111
DATA	757	9	77	0	0	A_64_P040004	XM_001054754	5517.76	237.817	1.516734e+003	1.517255e+002	1225	44	8.789128e+000	0	0	0	0	0	0	1214.89	1	1	47.2035	42.9655
DATA	758	9	78	0	0	A_64_P156785	XM_001058828	5543.42	238.427	4.003624e+000	3.989309e+000	62	44	8.789424e+000	0	0	0	0	0	0	0.523842	0	0	57.5363	43.9286
DATA	759	9	79	0	0	A_64_P123914	XM_217505	5568.5	238.289	1.347743e+004	1.347749e+003	10758.5	41	7.977050e+000	0	0	0	0	0	0	10741.4	1	1	49.1849	38.4333
DATA	760	9	80	66	1	DarkCorner	DarkCorner	5594.11	238.5	4.020755e+000	4.005838e+000	57	44	5.152794e+000	0	0	0	0	0	0	-3.47811	0	0	65	43.75
DATA	761	9	81	66	1	DarkCorner	DarkCorner	5619.5	238.5	4.026915e+000	4.011975e+000	60	43	9.683073e+000	0	0	0	0	0	0	-0.893278	0	0	57.5363	42
DATA	762	9	82	66	1	DarkCorner	DarkCorner	5645.15	238.526	4.031329e+000	4.016373e+000	55.5	35.5	7.662727e+000	0	0	0	0	0	0	-3.3912	0	0	50.1463	36.75
DATA	763	9	83	66	1	DarkCorner	DarkCorner	5670.42	238.427	4.033832e+000	4.018866e+000	59.5	36	8.091876e+000	0	0	0	0	0	0	-0.698444	0	0	65	37.0385
DATA	764	9	84	66	1	DarkCorner	DarkCorner	5695.4	238.533	4.034303e+000	4.019335e+000	58	41	9.246121e+000	0	0	0	0	0	0	-1.16542	0	0	42.9674	42.2571
DATA	765	9	85	66	1	DarkCorner	DarkCorner	5721.11	238.5	4.032699e+000	4.026694e+000	61	38	8.647203e+000	0	0	0	0	0	0	2.12875	0	0	56.9804	38.5294
DATA	766	10	1	66	1	DarkCorner	DarkCorner	3600.53	243.661	3.468844e+000	3.455974e+000	58.5	41	9.727660e+000	0	0	0	0	0	0	-0.489302	0	0	44.0646	40.5227
DATA	767	10	2	66	1	DarkCorner	DarkCorner	3626.39	244.069	3.454560e+000	3.441744e+000	58.5	40	9.401212e+000	0	0	0	0	0	0	-0.864835	0	0	65	42.129
DATA	768	10	3	66	1	DarkCorner	DarkCorner	3651.5	244	3.441014e+000	3.428248e+000	59	40	6.462120e+000	0	0	0	0	0	0	-0.924	0	0	54.1152	40.5952
DATA	769	10	4	66	1	DarkCorner	DarkCorner	3676.42	243.404	3.427913e+000	3.415196e+000	57	40	6.304460e+000	0	0	0	0	0	0	-2.63306	0	0	40.6843	41.3939
DATA	770	10	5	66	1	DarkCorner	DarkCorner	3702.5	244	3.414466e+000	3.401798e+000	56	44	7.513862e+000	0	0	0	0	0	0	-6.65732	0	0	54.1152	44.3793
DATA	771	10	6	66	1	DarkCorner	DarkCorner	3727.1	243.827	3.402215e+000	3.389593e+000	55.5	43	7.723136e+000	0	0	0	0	0	0	-3.95662	0	0	49.5074	43.3056
DATA	772	10	7	0	0	A_64_P139937	XM_001070013	3753.09	244.065	3.389675e+000	3.383733e+000	63.5	44	9.138707e+000	0	0	0	0	0	0	1.99829	0	0	65	43.1143
DATA	773	10	8	0	0	A_44_P185613	XM_001080030	3778.15	244.5	3.763268e+001	5.048640e+000	97	42	9.407399e+000	0	0	0	0	0	0	35.63	1	1	49.8279	44.1714
DATA	774	10	9	0	0	A_42_P738520	NM_001007746	3803.32	243.779	4.042021e+002	4.055916e+001	453	45	1.043143e+001	0	0	0	1	0	0	383.961	1	1	46.5243	49.2593
DATA	775	10	10	66	-1	(-)3xSLv1	NegativeControl	3828.64	244.545	3.356095e+000	3.343644e+000	60.5	43	9.215552e+000	0	0	0	0	0	0	-1.30564	0	0	45.4864	44.5455
DATA	776	10	11	0	0	A_42_P626023	NM_001107265	3854.58	244.427	2.507874e+002	2.529928e+001	292	41.5	8.678307e+000	0	0	0	0	0	0	239.74	1	1	57.5363	41.8333
DATA	777	10	12	0	0	A_43_P11120	XR_085824	3880	244.455	1.349936e+003	1.350345e+002	1327.5	41	5.836598e+000	0	0	0	0	0	0	1294.21	1	1	55.8519	40.3611
DATA	778	10	13	0	0	A_42_P473425	NM_138844	3905.15	243.866	4.041756e+001	5.227127e+000	98	40	7.027575e+000	0	0	0	0	0	0	38.8535	1	1	46.1809	39.6471
DATA	779	10	14	0	0	A_44_P692981	ENSRNOT00000007422	3930.58	244.427	3.831069e+001	5.060457e+000	99	43	1.083353e+001	0	0	0	0	0	0	36.9222	1	1	57.5363	44.2941
DATA	780	10	15	0	0	A_64_P102366	A_64_P102366	3956.21	244.667	1.942434e+001	3.827827e+000	80	40.5	9.576312e+000	0	0	0	0	0	0	18.765	1	1	45.4864	41.4667
DATA	781	10	16	0	0	A_42_P616287	NM_001134555	3981.58	244.427	2.880669e+002	2.899410e+001	338	41	1.016744e+001	0	0	0	1	0	0	278.891	1	1	57.5363	45.2424
DATA	782	10	17	0	0	A_64_P073995	XM_001081370	4007.41	244.735	1.897986e+001	3.793599e+000	79	42.5	9.565644e+000	0	0	0	0	0	0	18.4121	1	1	46.8651	44.3077
DATA	783	10	18	0	0	A_42_P595381	NM_001107258	4032.21	244.176	1.422937e+003	1.423315e+002	1413	42	1.466675e+001	0	0	0	0	0	0	1382.74	1	1	46.1809	47.3636
DATA	784	10	19	0	0	A_42_P462205	NM_001007745	4057.67	244.5	2.316637e+003	2.316868e+002	2213	43.5	1.377525e+001	0	0	0	0	0	0	2254.7	1	1	57.5363	46.3667
DATA	785	10	20	0	0	A_64_P016102	A_64_P016102	4083.33	244.5	5.495929e+001	6.394913e+000	111	39	7.605057e+000	0	0	0	0	0	0	53.5623	1	1	57.5363	39.2647
DATA	786	10	21	0	0	A_64_P017829	NM_001128216	4108.5	244.5	3.278054e+000	3.277849e+000	65	48	1.099059e+001	0	0	0	0	0	0	2.72899	0	0	57.5363	49.3103
DATA	787	10	22	0	0	A_64_P090244	NM_001127449	4134	244.455	1.084318e+005	1.084318e+004	107149	39.5	1.058586e+001	0	0	0	0	0	0	105888	1	1	55.8519	42.5625
DATA	788	10	23	0	0	A_42_P503626	NM_001044247	4159.5	244.5	3.421914e+001	4.726755e+000	97	47	1.093130e+001	0	0	0	0	0	0	33.4386	1	1	57.5363	48.92
DATA	789	10	24	0	0	A_64_P144850	ENSRNOT00000002335	4184.67	244.5	4.116863e+001	5.250914e+000	102.5	53	9.838016e+000	0	0	0	0	1	0	40.2469	1	1	57.5363	55.5143
DATA	790	10	25	0	0	A_42_P703023	NM_145776	4210.33	244.5	3.768656e+002	3.782718e+001	436	49	1.440869e+001	0	0	0	1	0	0	368.504	1	1	65	53.0909
DATA	791	10	26	0	0	A_64_P153581	NM_001109367	4235.5	244.5	3.531930e+001	4.805660e+000	97	44.5	1.345357e+001	0	0	0	0	0	0	34.5345	1	1	57.5363	49.0385
DATA	792	10	27	0	0	A_44_P156782	NM_001013879	4260.68	244.366	8.102412e+002	8.108966e+001	845	52.5	2.005398e+001	0	0	0	0	1	0	792.03	1	1	48.2044	55.9
DATA	793	10	28	0	0	A_43_P12841	NM_053535	4286.42	244.573	1.160692e+002	1.205640e+001	176	49	1.017286e+001	0	0	0	0	0	0	113.403	1	1	57.5363	48.1111
DATA	794	10	29	0	0	A_64_P097715	NM_001135710	4311.58	244.573	1.080688e+002	1.128896e+001	166.5	50.5	1.365937e+001	0	0	0	0	0	0	105.508	1	1	65	51.5385
DATA	795	10	30	0	0	A_42_P769597	NM_001106230	4336.86	244.722	4.761394e+002	4.772588e+001	529	43	9.355001e+000	0	0	0	0	0	0	464.408	1	1	47.8731	44.6176
DATA	796	10	31	0	0	A_42_P561835	ENSRNOT00000043937	4362.5	244.5	1.367445e+002	1.406021e+001	182	42	1.150189e+001	0	0	0	0	0	0	133.212	1	1	57.5363	43.2963
DATA	797	10	32	0	0	A_42_P604399	NM_012941	4387.63	244.63	6.590156e+003	6.590238e+002	6420	45	8.276026e+000	0	0	0	0	0	0	6410.7	1	1	48.2044	45.7241
DATA	798	10	33	0	0	A_42_P744495	NM_017125	4413.06	244.389	1.782356e+003	1.782658e+002	1791	46	1.164246e+001	0	0	0	0	0	0	1730.9	1	1	48.2044	47.7586
DATA	799	10	34	0	0	A_64_P047391	A_64_P047391	4438.5	244.5	2.068127e+002	2.094092e+001	270	45	1.084874e+001	0	0	0	0	0	0	200.457	1	1	46.5243	44.5152
DATA	800	10	35	0	0	A_44_P856007	NM_001108489	4464.09	244.614	9.312089e+001	9.877705e+000	151	43	1.121763e+001	0	0	0	0	0	0	90.0641	1	1	57.259	44.9091
DATA	801	10	36	0	0	A_64_P057562	ENSRNOT00000031129	4489.5	244.648	3.324368e+002	3.340731e+001	384	44	7.806506e+000	0	0	0	0	0	0	320.761	1	1	57.5363	44.6923
DATA	802	10	37	0	0	A_64_P102395	ENSRNOT00000029656	4514.63	244.596	7.688360e+001	8.370952e+000	138	41	7.293322e+000	0	0	0	0	0	0	73.9929	1	1	57.8122	42.0313
DATA	803	10	38	0	0	A_64_P132318	NM_133296	4539.94	244.768	6.982104e+002	6.989994e+001	716	40	7.908538e+000	0	0	0	0	0	0	670.079	1	1	46.5243	40.2143
DATA	805	10	40	0	0	A_64_P158848	NM_001130540	4590.81	245.129	6.238555e+002	6.247495e+001	651	38.5	9.562386e+000	0	0	0	0	0	0	594.977	1	1	46.8651	40.3409
DATA	806	10	41	0	0	A_64_P302888	NM_001135015	4616.16	244.746	3.859656e+001	5.112411e+000	97	38.5	1.028936e+001	0	0	0	0	0	0	36.6834	1	1	45.1352	39.5
DATA	807	10	42	0	0	A_42_P604331	NM_001108533	4641.61	244.931	4.741724e+004	4.741725e+003	44213.5	42	1.050838e+001	0	0	0	0	0	0	44902.9	1	1	53.8203	44.1154
DATA	808	10	43	0	0	A_64_P166406	NM_019152	4667.23	244.913	3.105635e+002	3.123950e+001	354.5	43	9.385152e+000	0	0	0	0	0	0	292.96	1	1	46.5243	44.4054
DATA	809	10	44	0	0	A_64_P123660	NM_001031655	4692.5	245	7.485465e+002	7.493144e+001	762	42.5	9.569503e+000	0	0	0	0	0	0	703.302	1	1	65	44.1538
DATA	810	10	45	0	0	A_42_P668800	NM_001127553	4718	245	5.287118e+002	5.298075e+001	541	47	1.205661e+001	0	0	0	0	0	0	494.667	1	1	65	48.8438
DATA	811	10	46	0	0	A_64_P090458	NM_001109516	4743.5	245	1.347235e+001	3.676402e+000	73	49	1.000946e+001	0	0	0	0	0	0	12.5497	1	0	65	49.5484
DATA	812	10	47	0	0	A_42_P635396	NM_001109506	4768.3	245.076	1.385085e+003	1.385511e+002	1322	44	1.357328e+001	0	0	0	0	0	0	1284.55	1	1	45.835	45.3448
DATA	813	10	48	0	0	A_64_P002989	NM_031604	4794.5	245	4.258553e+004	4.258554e+003	39042	47	8.480411e+000	0	0	0	0	0	0	39304.3	1	1	54.1152	43.9259
DATA	814	10	49	0	0	A_44_P914346	DV717012	4819.38	245	9.449551e+002	9.455915e+001	934.5	52	1.548688e+001	0	0	0	0	0	0	868.042	1	1	48.5334	51.52
DATA	815	10	50	0	0	A_44_P791176	NM_001130577	4845	245	2.822903e+001	4.485716e+000	91	43	9.831343e+000	0	0	0	0	0	0	25.8022	1	1	54.9904	44.0303
DATA	816	10	51	0	0	A_64_P011894	NM_001004210	4870.17	245	1.461034e+004	1.461038e+003	13000	47	1.454270e+001	0	0	0	0	0	0	13287.4	1	1	46.8651	50.5185
DATA	817	10	52	0	0	A_42_P717654	XM_001063683	4895.77	245.107	2.279401e+003	2.279673e+002	2059	48	1.412944e+001	0	0	0	0	0	0	2062.22	1	1	48.2044	51.8889
DATA	818	10	53	0	0	A_64_P006102	NM_001100784	4921.42	245.427	3.164719e+002	3.184465e+001	343	48.5	1.117938e+001	0	0	0	0	0	0	284.799	1	1	57.5363	49.5385
DATA	819	10	54	0	0	A_64_P116038	NM_001000335	4946.5	245.352	1.826602e+001	4.000886e+000	81	41	8.737411e+000	0	0	0	0	0	0	16.351	1	1	57.5363	41.8649
DATA	820	10	55	0	0	A_42_P581567	NM_001011899	4971.91	245.386	8.832797e+001	9.530347e+000	144.5	37	7.834652e+000	0	0	0	0	0	0	78.6389	1	1	57.259	39.1034
DATA	821	10	56	0	0	A_42_P671206	FQ231880	4996.92	245.169	7.792889e+002	7.801193e+001	749	40	9.711852e+000	0	0	0	0	0	0	690.054	1	1	46.8651	41.5152
DATA	823	10	58	0	0	A_64_P078205	NM_001044255	5047.7	245.1	2.550823e+003	2.551083e+002	2240	42.5	9.712494e+000	0	0	0	0	0	0	2233.74	1	1	47.2035	42.6944
DATA	824	10	59	66	-1	(-)3xSLv1	NegativeControl	5073.98	245.325	3.673442e+000	3.659813e+000	58	42	7.822906e+000	0	0	0	0	0	0	-3.19022	0	0	51.0895	41.8824
DATA	825	10	60	0	0	A_44_P259051	NM_001037658	5098.55	244.942	4.624853e+002	4.639469e+001	461	40	8.517408e+000	0	0	0	0	0	0	400.476	1	1	47.5395	41.2903
DATA	826	10	61	0	0	A_64_P325262	A_64_P325262	5124.42	245.427	3.218893e+001	4.904733e+000	90.5	41	8.216094e+000	0	0	0	0	0	0	27.7156	1	1	57.5363	41.2857
DATA	827	10	62	0	0	A_64_P140005	NM_001191804	5149.78	245.104	1.360094e+001	3.962123e+000	74	40	7.998768e+000	0	0	0	0	0	0	11.6457	1	0	45.835	38.1379
DATA	828	10	63	0	0	A_42_P588606	NM_001134544	5175	245.342	1.227321e+002	1.283091e+001	168.5	42	8.785252e+000	0	0	0	0	0	0	104.516	1	1	49.1849	42.2258
DATA	829	10	64	0	0	A_42_P788541	NM_001106794	5200.5	245.5	2.682197e+003	2.682461e+002	2339	37	8.964562e+000	0	0	0	0	0	0	2271.64	1	1	52.9257	39.5676
DATA	830	10	65	0	0	A_44_P1050200	NM_001108000	5225.94	244.969	7.544940e+002	7.554417e+001	712	39.5	8.201040e+000	0	0	0	0	0	0	635.554	1	1	46.8651	40.0313
DATA	831	10	66	0	0	A_42_P777935	ENSRNOT00000027369	5251.48	245.554	1.369551e+002	1.421365e+001	177	39	9.621557e+000	0	0	0	0	0	0	114.759	1	1	45.4864	40.2
DATA	832	10	67	0	0	A_44_P349475	NM_031333	5276.4	245.235	7.098452e+002	7.108734e+001	658	43	1.159761e+001	0	0	0	0	0	0	591.782	1	1	46.5243	44.2308
DATA	833	10	68	0	0	A_64_P136188	XM_001059617	5302.06	245.366	3.516294e+002	3.537216e+001	351.5	41	6.987345e+000	0	0	0	0	0	0	291.662	1	1	48.2044	40.9333
DATA	834	10	69	0	0	A_64_P023386	NM_001106232	5327.38	245.5	1.965677e+004	1.965680e+003	16248.5	42	6.418723e+000	0	0	0	0	0	0	16225.6	1	1	49.8279	41.2
DATA	835	10	70	0	0	A_64_P048576	NM_001000163	5353.34	245.508	3.344576e+001	5.121646e+000	89	42	3.216456e+000	0	0	0	0	0	0	27.4754	1	1	45.4864	43.2941
DATA	836	10	71	1028	1	(+)E1A_r60_a20	E1A_r60_a20	5378.33	245.5	3.713369e+001	5.382202e+000	91	47.5	1.038282e+001	0	0	0	0	0	0	30.3702	1	1	57.5363	49.7727
DATA	837	10	72	0	0	A_64_P078510	XM_001053102	5403.79	245.479	4.484717e+002	4.501754e+001	423.5	45	9.563850e+000	0	0	0	0	0	0	365.214	1	1	48.2044	46.6571
DATA	838	10	73	0	0	A_64_P101533	A_64_P101533	5429.6	245.613	4.235077e+000	3.951651e+000	66	44	1.297906e+001	0	0	0	0	0	0	3.43472	1	0	53.5237	47.5484
DATA	839	10	74	0	0	A_64_P164601	ENSRNOT00000050537	5454.04	245.865	5.629183e+001	6.872867e+000	108	41	9.203854e+000	0	0	0	0	0	0	45.4884	1	1	46.8651	43.6286
DATA	840	10	75	0	0	A_42_P694928	NM_001109046	5479.33	245.246	1.635505e+002	1.682697e+001	189	44	9.330296e+000	0	0	0	0	0	0	131.695	1	1	44.0646	44.0566
DATA	841	10	76	0	0	A_42_P510565	ENSRNOT00000046259	5505.17	245.464	1.004754e+003	1.005538e+002	859	44	7.249828e+000	0	0	0	0	0	0	806.429	1	1	47.2035	43.32
DATA	842	10	77	0	0	A_64_P050877	XM_001081816	5530.58	245.573	9.799944e+000	4.100265e+000	70	43	9.254699e+000	0	0	0	0	0	0	7.84305	1	0	57.5363	43.129
DATA	843	10	78	0	0	A_44_P281352	NM_001013076	5556	245.545	2.449202e+002	2.481514e+001	255	43.5	9.506743e+000	0	0	0	0	0	0	195.519	1	1	55.8519	43.6333
DATA	844	10	79	0	0	A_44_P269675	ENSRNOT00000031839	5581.29	245.553	4.534760e+002	4.552368e+001	420	45	5.920034e+000	0	0	0	0	0	0	361.238	1	1	49.1849	45.2414
DATA	845	10	80	66	1	DarkCorner	DarkCorner	5607.78	246.492	4.021890e+000	4.006968e+000	56	44	6.088029e+000	0	0	0	0	0	0	-4.43238	0	0	42.9674	42.75
DATA	846	10	81	66	1	DarkCorner	DarkCorner	5633.05	245.924	4.027247e+000	4.012306e+000	59	37.5	1.133599e+001	0	0	0	0	0	0	-2.38925	0	0	46.8651	40.7692
DATA	847	10	82	66	1	DarkCorner	DarkCorner	5657.29	246.038	4.030488e+000	4.015534e+000	59	36.5	7.401405e+000	0	0	0	0	0	0	-1.86566	0	0	49.1849	37.2083
DATA	848	10	83	66	1	DarkCorner	DarkCorner	5682.91	245.614	4.032159e+000	4.019532e+000	60	40.5	8.927965e+000	0	0	0	0	0	0	1.08595	0	0	65	40.4412
DATA	849	10	84	66	1	DarkCorner	DarkCorner	5708.42	245.573	4.031636e+000	4.024306e+000	61	41.5	7.603832e+000	0	0	0	0	0	0	1.96465	0	0	57.5363	41.8056
DATA	850	10	85	66	1	DarkCorner	DarkCorner	5734.06	246.312	4.028676e+000	4.029950e+000	62	36	8.080042e+000	0	0	0	0	0	0	2.86757	0	0	48.5334	36.699
DATA	851	11	1	66	1	DarkCorner	DarkCorner	3588	251.455	3.474837e+000	3.461945e+000	57	35	7.788649e+000	0	0	0	0	0	0	-0.00504555	0	0	55.8519	35.5257
DATA	852	11	2	66	1	DarkCorner	DarkCorner	3613.42	251.427	3.460821e+000	3.448479e+000	61	42.5	8.369622e+000	0	0	0	0	0	0	0.541369	0	0	57.5363	42.4667
DATA	853	11	3	66	1	DarkCorner	DarkCorner	3637.27	250.889	3.447946e+000	3.435154e+000	59	40	6.263080e+000	0	0	0	0	0	0	-2.49885	0	0	37.4241	40.7368
DATA	854	11	4	66	1	DarkCorner	DarkCorner	3664.42	251.427	3.433470e+000	3.420731e+000	59	40	5.101990e+000	0	0	0	0	0	0	-1.5252	0	0	57.5363	39.697
DATA	855	11	5	66	1	DarkCorner	DarkCorner	3689.58	251.427	3.420441e+000	3.407751e+000	57	40	5.857813e+000	0	0	0	0	0	0	-3.8068	0	0	57.5363	40.2258
DATA	856	11	6	66	1	DarkCorner	DarkCorner	3714.53	251.967	3.407834e+000	3.395190e+000	60	42	9.150897e+000	0	0	0	0	0	0	-1.17428	0	0	43.7019	44.1034
DATA	857	11	7	0	0	A_64_P077381	A_64_P077381	3739.9	251.651	2.141051e+001	4.003498e+000	81	43.5	7.597402e+000	0	0	0	0	0	0	20.167	1	1	44.7812	43.35
DATA	858	11	8	0	0	A_64_P085926	NM_030860	3765.5	251.289	6.560979e+002	6.569633e+001	675.5	41	9.099102e+000	0	0	0	0	0	0	620.188	1	1	49.1849	43.1429
DATA	859	11	9	0	0	A_42_P598560	NM_001033693	3791.33	251.5	6.371206e+002	6.380056e+001	646	45	7.264516e+000	0	0	0	0	0	0	604.337	1	1	57.5363	46.5313
DATA	860	11	10	0	1	ETG08_142674	ETG08_142674	3816.5	251.5	1.028461e+001	3.502800e+000	68.5	47	1.271652e+001	0	0	0	0	0	0	9.78699	1	0	57.5363	49.72
DATA	861	11	11	0	0	A_42_P724142	NM_001106340	3841.63	251.37	5.530663e+002	5.540728e+001	601	40	8.008720e+000	0	0	0	0	0	0	527.931	1	1	48.2044	40.7037
DATA	862	11	12	0	0	A_64_P054193	NM_001014193	3867.5	251.5	2.008469e+004	2.008471e+003	18971	41	8.548572e+000	0	0	0	0	0	0	19229.8	1	1	57.5363	40.2432
DATA	863	11	13	0	0	A_42_P750554	NM_001107846	3892.67	251.5	5.467851e+002	5.477914e+001	576	41	5.838950e+000	0	0	0	0	0	0	524.965	1	1	57.5363	41.52
DATA	864	11	14	0	0	A_44_P285547	NM_053393	3918.33	251.5	7.258122e+001	7.977268e+000	134	39	8.180766e+000	0	0	0	0	0	0	69.8698	1	1	57.5363	39.7297
DATA	865	11	15	0	0	A_42_P623374	NM_138845	3943.5	251.5	9.348950e+002	9.354780e+001	944	41	9.150374e+000	0	0	0	0	0	0	902.15	1	1	57.5363	41.963
DATA	866	11	16	0	0	A_64_P064888	NM_001127303	3968.89	251.5	1.979654e+002	2.006881e+001	254	40	8.362744e+000	0	0	0	0	0	0	191.463	1	1	56.9804	40.75
DATA	867	11	17	0	0	A_44_P522406	NM_001001103	3994.08	251.597	2.109134e+001	3.906232e+000	84.5	43	8.109324e+000	0	0	0	0	0	0	20.4403	1	1	48.2044	43.7647
DATA	868	11	18	0	0	A_42_P660129	NM_130422	4019.58	251.573	4.753380e+001	5.776201e+000	111	46	1.090963e+001	0	0	0	0	0	0	46.1528	1	1	57.5363	48.4074
DATA	869	11	19	0	0	A_64_P035679	A_64_P035679	4044.89	251.318	2.737798e+004	2.737800e+003	26160	40	1.623868e+001	0	0	0	0	0	0	26626.4	1	1	52.9257	45.1379
DATA	870	11	20	0	0	A_64_P118862	NM_001191999	4070.5	251.5	6.918214e+001	7.652772e+000	119	43.5	1.218072e+001	0	0	0	0	0	0	67.381	1	1	57.5363	44.2188
DATA	871	11	21	0	0	A_42_P638181	NM_133395	4095.44	251.532	8.265826e+003	8.265891e+002	7934.5	43.5	7.651500e+000	0	0	0	0	0	0	8060.33	1	1	49.8279	43
DATA	872	11	22	0	0	A_44_P423803	NM_031144	4121.04	251.447	1.487127e+004	1.487130e+003	14602	45.5	1.077225e+001	0	0	0	0	0	0	14516.3	1	1	49.1849	46.4
DATA	874	11	24	0	0	A_44_P445195	NM_133300	4170.81	251.279	9.246942e+002	9.252687e+001	978	53	1.036641e+001	0	0	0	0	1	0	903.812	1	1	52.0157	54.0645
DATA	875	11	25	0	0	A_42_P563276	NM_013093	4197.5	251.648	6.404213e+001	7.185706e+000	126	53	1.324672e+001	0	0	0	0	1	0	62.6175	1	1	65	55.2286
DATA	876	11	26	0	0	A_42_P535608	NM_001107160	4222.58	251.592	1.760353e+002	1.790259e+001	238	46	1.311481e+001	0	0	0	0	0	0	172.134	1	1	47.8731	50.2083
DATA	877	11	27	0	0	A_44_P233080	ENSRNOT00000026303	4247.97	251.716	3.693700e+003	3.693844e+002	3664	51	1.774125e+001	0	0	0	0	0	0	3611.33	1	1	48.8603	53.4242
DATA	878	11	28	0	0	A_43_P13320	NM_138880	4273.5	251.648	1.263448e+001	3.496568e+000	75	48	1.696803e+001	0	0	0	0	0	0	12.348	1	0	57.5363	51.7742
DATA	879	11	29	0	0	A_42_P548007	NM_001135020	4298.73	251.781	4.894819e+003	4.894927e+002	4827	52	1.389206e+001	0	0	0	0	1	0	4780.92	1	1	48.2044	54.7857
DATA	880	11	30	0	0	A_44_P282853	NM_031983	4324	251.797	1.797765e+003	1.798061e+002	1805	46	1.503430e+001	0	0	0	0	0	0	1754.45	1	1	46.8651	51.0303
DATA	881	11	31	0	0	A_42_P552341	NM_053519	4349.38	252	5.015129e+002	5.025769e+001	542	47.5	1.602957e+001	0	0	0	0	0	0	488.898	1	1	48.5334	50.4667
DATA	882	11	32	0	0	A_64_P031476	NM_001107172	4374.83	251.971	1.572673e+002	1.606370e+001	214	44	1.006325e+001	0	0	0	0	0	0	153.108	1	1	46.8651	45.2
DATA	883	11	33	0	0	A_42_P620762	NM_024403	4400.63	251.829	5.928873e+003	5.928964e+002	5841.5	50	1.085257e+001	0	0	0	0	0	0	5762.93	1	1	49.8279	50.7241
DATA	884	11	34	0	0	A_64_P135370	A_64_P135370	4425.93	251.8	2.576898e+002	2.597740e+001	312.5	46	1.402976e+001	0	0	0	0	0	0	250.03	1	1	46.8651	49.1176
DATA	885	11	35	0	0	A_42_P576202	NM_001108583	4451	251.797	4.330214e+002	4.342699e+001	469	42	9.622941e+000	0	0	0	1	0	0	419.312	1	1	46.8651	42.3793
DATA	886	11	36	0	0	A_64_P022879	NM_001109019	4476.5	252	2.790977e+001	4.320472e+000	91.5	43.5	9.282956e+000	0	0	0	0	0	0	26.9652	1	1	54.1152	43.6071
DATA	887	11	37	0	0	A_42_P711589	NM_022948	4501.84	251.897	2.380478e+003	2.380707e+002	2326	43	6.058998e+000	0	0	0	0	0	0	2294.24	1	1	46.5243	43.4348
DATA	888	11	38	0	0	A_64_P007244	A_64_P007244	4527.28	252.11	3.303611e+003	3.303777e+002	3268	41	8.301779e+000	0	0	0	0	0	0	3175.36	1	1	49.8279	41.6667
DATA	889	11	39	0	0	A_42_P477625	NM_001108719	4552.56	252.027	1.447740e+003	1.448122e+002	1406.5	42	9.773430e+000	0	0	0	0	0	0	1387.51	1	1	48.5334	41.9583
DATA	890	11	40	0	0	A_64_P153091	XM_341223	4577.51	252.282	4.625373e+002	4.637380e+001	502	40	1.024695e+001	0	0	0	0	0	0	441.938	1	1	49.1849	41.4
DATA	891	11	41	0	0	A_64_P016347	NM_130819	4604.05	252.064	3.359022e+000	3.346560e+000	61	38	7.466140e+000	0	0	0	0	0	0	-1.68457	0	0	48.5334	38.9189
DATA	892	11	42	0	0	A_42_P495598	NM_001014026	4629.37	252.404	3.370856e+000	3.374891e+000	66	39.5	8.940625e+000	0	0	0	0	0	0	3.16649	0	0	65	41.75
DATA	893	11	43	0	0	A_42_P759043	NM_001134509	4653.96	251.574	3.335909e+002	3.352893e+001	385	40	7.020958e+000	0	0	0	0	0	0	315.366	1	1	46.1809	40.5769
DATA	894	11	44	0	0	A_64_P071595	XM_002728361	4679.9	252.722	8.124891e+000	3.480130e+000	72.5	41	9.066986e+000	0	0	0	0	0	0	7.65056	1	0	49.8279	42.9091
DATA	895	11	45	0	0	A_42_P780882	NM_001008511	4705.06	251.627	3.004413e+003	3.004605e+002	2892	45	8.589323e+000	0	0	0	0	0	0	2817.49	1	1	45.835	45.4
DATA	896	11	46	0	0	A_64_P044420	NM_001134983	4730.58	252.427	6.486980e+001	7.329729e+000	122	47	8.559505e+000	0	0	0	0	0	0	60.5748	1	1	65	47.3438
DATA	897	11	47	0	0	A_64_P000596	NM_001025732	4756.11	252.5	1.300619e+003	1.301071e+002	1255.5	44	9.888292e+000	0	0	0	0	0	0	1209.11	1	1	56.9804	45.2759
DATA	898	11	48	0	0	A_44_P468873	ENSRNOT00000015693	4781.5	252.352	3.420405e+001	4.853422e+000	96	43	1.100108e+001	0	0	0	0	0	0	31.6519	1	1	57.5363	44.0968
DATA	900	11	50	0	0	A_42_P727022	NM_001107076	4832.09	252.104	6.460304e+003	6.460397e+002	5901	46.5	1.392430e+001	0	0	0	0	0	0	5921.3	1	1	46.8651	50.9
DATA	901	11	51	0	0	A_64_P135604	NM_001009641	4857.56	252.266	1.700985e+003	1.701344e+002	1603.5	45	9.205976e+000	0	0	0	0	0	0	1551.28	1	1	50.7771	45.6
DATA	902	11	52	0	0	A_42_P813939	NM_001108741	4882.73	252.155	1.234051e+003	1.234550e+002	1152.5	49	1.534009e+001	0	0	0	0	0	0	1119.75	1	1	47.5395	52.4194
DATA	903	11	53	0	0	A_64_P052494	A_64_P052494	4908.5	252.5	2.905963e+001	4.572449e+000	91	52	1.364476e+001	0	0	0	0	1	0	26.2292	1	1	57.5363	55.1111
DATA	904	11	54	0	0	A_44_P323678	NM_001107651	4933.67	252.5	8.761626e+000	3.655427e+000	71	41	1.044031e+001	0	0	0	0	0	0	7.86674	1	0	57.5363	44.3333
DATA	905	11	55	0	0	A_44_P435764	NM_001191810	4959.33	252.5	9.214945e+000	3.685320e+000	72	39	6.387488e+000	0	0	0	0	0	0	8.22882	1	0	57.5363	39.6
DATA	906	11	56	0	0	A_42_P688320	NM_001108569	4984.5	252.5	1.769879e+002	1.805874e+001	217	41	7.001831e+000	0	0	0	0	0	0	157.196	1	1	57.5363	40.8889
DATA	907	11	57	0	0	A_42_P798500	NM_001014023	5009.94	252.232	3.199400e+002	3.219674e+001	352	40	9.038124e+000	0	0	0	1	0	0	282.593	1	1	46.5243	40.9189
DATA	908	11	58	0	0	A_44_P279083	NM_133401	5035.35	252.222	2.199905e+002	2.229614e+001	257	41	1.005488e+001	0	0	0	0	0	0	193.235	1	1	47.5395	40.7143
DATA	909	11	59	0	0	A_64_P129850	NM_001002855	5060.67	252.5	1.841835e+001	4.086396e+000	76	45	9.293965e+000	0	0	0	0	0	0	16.0888	1	1	57.5363	44.7222
DATA	910	11	60	0	0	A_64_P029468	NM_001105784	5086.09	252.871	1.882146e+001	4.122854e+000	79	43	7.972666e+000	0	0	0	0	0	0	16.3495	1	1	46.8651	44.2083
DATA	911	11	61	0	0	A_43_P18571	NM_001013965	5111.5	252.5	1.523375e+002	1.567400e+001	194	41	7.437092e+000	0	0	0	0	0	0	131.59	1	1	57.5363	43
DATA	912	11	62	0	1	ERCC-00104_60	ERCC-00104_60	5137	252.545	2.275481e+001	4.351771e+000	83.5	41	8.330593e+000	0	0	0	0	0	0	19.5462	1	1	55.8519	40.4146
DATA	913	11	63	0	0	A_44_P653701	NM_001106536	5162.44	252.571	6.493225e+001	7.488345e+000	117	40	7.934023e+000	0	0	0	0	0	0	55.4684	1	1	49.8279	40.2222
DATA	914	11	64	0	0	A_64_P093593	NM_001107077	5187.54	252.917	2.156741e+002	2.189103e+001	249	43	1.071517e+001	0	0	0	0	0	0	183.249	1	1	48.2044	43
DATA	915	11	65	0	0	A_44_P1034793	NM_001008300	5213.06	252.232	5.105900e+002	5.119805e+001	502.5	39	7.873794e+000	0	0	0	0	0	0	431.458	1	1	46.5243	40.0571
DATA	916	11	66	0	0	A_42_P768355	NM_057130	5238.44	252.48	3.178358e+002	3.200885e+001	329.5	42	7.159774e+000	0	0	0	0	0	0	267.157	1	1	49.1849	42.9355
DATA	917	11	67	0	0	A_44_P714581	NM_001107480	5264.12	252.438	2.468437e+003	2.468731e+002	2098	37	9.336182e+000	0	0	0	0	0	0	2063.93	1	1	52.9257	38.9167
DATA	918	11	68	0	0	A_64_P084521	NM_019351	5289.37	252.37	2.742869e+003	2.743136e+002	2324.5	42	9.119639e+000	0	0	0	0	0	0	2281.81	1	1	48.2044	41.0667
DATA	919	11	69	0	0	A_42_P562625	NM_131913	5314.58	252.573	1.037151e+003	1.037865e+002	919	41	5.898235e+000	0	0	0	0	0	0	858.6	1	1	57.5363	39.5926
DATA	920	11	70	0	0	A_42_P468662	NM_001108886	5340.42	252.573	8.199661e+002	8.208778e+001	742	42	7.414168e+000	0	0	0	0	0	0	675.513	1	1	57.5363	42.6452
DATA	921	11	71	0	0	A_42_P778587	NM_001135767	5365.5	252.705	1.283688e+002	1.341199e+001	162	44	9.509995e+000	0	0	0	0	0	0	105.276	1	1	50.4627	46.24
DATA	922	11	72	0	0	A_64_P139957	NM_001008525	5390.63	253	5.923932e+003	5.924061e+002	4922	47	1.045940e+001	0	0	0	0	0	0	4837.3	1	1	48.5334	47.4483
DATA	923	11	73	0	0	A_44_P318402	NM_001000187	5416.6	252.192	7.670505e+001	8.613692e+000	123	45	1.143474e+001	0	0	0	0	0	0	62.3652	1	1	48.2044	46.625
DATA	924	11	74	0	0	A_64_P090359	NM_001033565	5441.72	253.547	1.965831e+001	4.397710e+000	75.5	50	1.224858e+001	0	0	0	0	0	0	15.923	1	0	47.8731	50.8696
DATA	925	11	75	0	0	A_43_P17778	NM_001134991	5465.93	253.493	2.140329e+001	4.490501e+000	80	44.5	8.848656e+000	0	0	0	0	0	0	17.2762	1	1	47.5395	45.1579
DATA	926	11	76	0	0	A_64_P093176	A_64_P093176	5492.91	252.897	2.723166e+001	4.807508e+000	83.5	44	8.832951e+000	0	0	0	0	0	0	21.9015	1	1	46.8651	43.9189
DATA	927	11	77	0	0	A_64_P100123	NM_182821	5517.68	252.863	2.409393e+003	2.409721e+002	1925	44	8.923429e+000	0	0	0	0	0	0	1932.06	1	1	48.2044	44.6
DATA	928	11	78	0	0	A_44_P426660	NM_001135717	5543.57	252.969	1.186565e+001	4.157452e+000	70.5	42	1.076616e+001	0	0	0	0	0	0	9.48888	1	0	44.7812	42.6563
DATA	929	11	79	0	0	A_42_P696084	NM_031022	5568.79	253	1.224746e+003	1.225397e+002	1061	42.5	7.564187e+000	0	0	0	0	0	0	977.163	1	1	46.8651	43.4286
DATA	930	11	80	66	1	DarkCorner	DarkCorner	5594	253	4.016342e+000	4.001441e+000	58	42	6.651720e+000	0	0	0	0	0	0	-1.30557	0	0	65	41.3947
DATA	931	11	81	66	1	DarkCorner	DarkCorner	5619.82	252.939	4.022588e+000	4.007664e+000	57	41	7.386679e+000	0	0	0	0	0	0	-4.04287	0	0	45.835	41.2857
DATA	932	11	82	66	1	DarkCorner	DarkCorner	5645.08	253.082	4.026870e+000	4.011930e+000	59	34	6.909880e+000	0	0	0	0	0	0	-2.44086	0	0	44.7812	35.1481
DATA	933	11	83	66	1	DarkCorner	DarkCorner	5669.86	253.068	4.029313e+000	4.014364e+000	57	40	9.000702e+000	0	0	0	0	0	0	-2.8913	0	0	46.8651	38.5667
DATA	934	11	84	66	1	DarkCorner	DarkCorner	5695.73	253.651	4.029657e+000	4.014707e+000	59	41	9.009671e+000	0	0	0	0	0	0	-0.210248	0	0	44.0646	41.2162
DATA	935	11	85	66	1	DarkCorner	DarkCorner	5720.84	253.028	4.028283e+000	4.015750e+000	61	37	7.051277e+000	0	0	0	0	0	0	1.10508	0	0	46.8651	37.85
DATA	936	12	1	66	1	DarkCorner	DarkCorner	3600.61	258.507	3.466951e+000	3.454197e+000	61	36	9.353409e+000	0	0	0	0	0	0	0.252366	0	0	45.835	37.9545
DATA	937	12	2	66	1	DarkCorner	DarkCorner	3626.16	258.493	3.453062e+000	3.440251e+000	56	42	8.792827e+000	0	0	0	0	0	0	-3.13336	0	0	47.8731	41.7297
DATA	938	12	3	66	1	DarkCorner	DarkCorner	3651.54	258.741	3.439498e+000	3.426737e+000	59.5	40	5.546640e+000	0	0	0	0	0	0	-2.09708	0	0	51.0895	39.6522
DATA	939	12	4	66	1	DarkCorner	DarkCorner	3676.95	258.523	3.426274e+000	3.413562e+000	57	42	7.540880e+000	0	0	0	0	0	0	-4.49642	0	0	55.8519	42
DATA	940	12	5	66	1	DarkCorner	DarkCorner	3702.42	258.573	3.413328e+000	3.400665e+000	57	39	9.123136e+000	0	0	0	0	0	0	-4.14426	0	0	57.5363	42.2273
DATA	941	12	6	0	0	A_64_P118227	XM_002728056	3727.32	258.859	8.842535e+000	3.501884e+000	70	42.5	7.750130e+000	0	0	0	0	0	0	8.31538	1	0	49.8279	43.5
DATA	942	12	7	0	0	A_64_P051317	NM_130425	3753.09	258.614	6.544288e+001	7.363850e+000	122	46	8.967157e+000	0	0	0	0	0	0	61.7643	1	1	57.259	44.0811
DATA	943	12	8	0	0	A_42_P756350	NM_021772	3778.5	258.648	5.019572e+001	6.042873e+000	108	40	6.831366e+000	0	0	0	0	0	0	47.5379	1	1	57.5363	40.6176
DATA	944	12	9	0	0	A_42_P816479	NM_022278	3803.51	258.573	4.770769e+003	4.770887e+002	4431	46.5	1.108839e+001	0	0	0	0	0	0	4532.94	1	1	49.1849	45.7143
DATA	945	12	10	0	0	A_64_P351634	NM_001029901	3829.24	258.764	1.518649e+002	1.555004e+001	205	41	6.103863e+000	0	0	0	0	0	0	144.76	1	1	47.5395	41.5714
DATA	946	12	11	0	0	A_64_P136597	A_64_P136597	3854.37	259	2.604988e+002	2.626221e+001	310	41	8.410987e+000	0	0	0	0	0	0	249.058	1	1	46.5243	41.1786
DATA	947	12	12	0	0	A_64_P052017	ENSRNOT00000033592	3880.09	258.935	1.733048e+001	3.747869e+000	79	41	7.406062e+000	0	0	0	0	0	0	16.6175	1	1	54.4085	40.7241
DATA	948	12	13	0	0	A_44_P444485	TC589779	3904.95	258.918	1.132509e+003	1.132994e+002	1085	40	7.455129e+000	0	0	0	0	0	0	1088.79	1	1	46.8651	40
DATA	949	12	14	0	0	A_44_P147373	XM_226249	3930.5	259	8.207901e+002	8.214556e+001	826	38	1.008243e+001	0	0	0	0	0	0	791.118	1	1	48.5334	40.1538
DATA	950	12	15	0	0	A_64_P059939	NM_001134540	3955.73	258.781	1.599476e+004	1.599480e+003	15171	41.5	8.704669e+000	0	0	0	0	0	0	15452.5	1	1	48.2044	41.7667
DATA	951	12	16	0	0	A_42_P637279	NM_012743	3981.12	258.785	2.857553e+001	4.358568e+000	90	42.5	8.869021e+000	0	0	0	0	0	0	27.6663	1	1	45.835	42.3529
DATA	952	12	17	0	0	A_42_P771570	XM_001080365	4007	259	1.909596e+002	1.937638e+001	243.5	40	9.294945e+000	0	0	0	0	0	0	185.253	1	1	54.9904	39.6296
DATA	953	12	18	0	0	A_43_P12942	NM_053817	4032.06	258.687	5.099185e+003	5.099290e+002	4910	41	1.177321e+001	0	0	0	0	0	0	4955.36	1	1	45.835	45.5862
DATA	954	12	19	0	0	A_64_P053307	NM_001191900	4057.5	259	3.028261e+001	4.459613e+000	92	41	1.030169e+001	0	0	0	0	0	0	29.4741	1	1	54.1152	41.2353
DATA	955	12	20	0	0	A_42_P595630	NM_001013189	4083	258.797	2.491920e+003	2.492134e+002	2485	42	8.985053e+000	0	0	0	0	0	0	2428.64	1	1	46.8651	39.7419
DATA	956	12	21	0	0	A_64_P154760	A_64_P154760	4108.48	258.93	2.274387e+002	2.297714e+001	283	48	9.249818e+000	0	0	0	0	0	0	221.911	1	1	47.8731	47.3226
DATA	957	12	22	0	0	A_42_P764359	NM_145086	4133.61	259.04	1.305847e+003	1.306255e+002	1319	49	1.249118e+001	0	0	0	0	0	0	1275.24	1	1	49.1849	48.3793
DATA	958	12	23	0	0	A_43_P10405	NM_001109257	4159.5	259.352	4.761075e+001	5.770589e+000	108	46	1.015072e+001	0	0	0	0	0	0	46.5266	1	1	57.5363	47.037
DATA	959	12	24	0	0	A_44_P269950	ENSRNOT00000014054	4184.58	259.427	3.539986e+001	4.811875e+000	96	52.5	1.061864e+001	0	0	0	0	0	0	34.6087	1	1	65	53.0238
DATA	960	12	25	0	0	A_44_P160763	NM_001106513	4210.42	259.427	9.712260e+001	1.024432e+001	162	45	9.671445e+000	0	0	0	0	0	0	94.9721	1	1	57.5363	48.8
DATA	961	12	26	0	0	A_64_P127678	NM_001008553	4235.5	259.352	4.345873e+002	4.358073e+001	499	53	1.188414e+001	0	0	0	0	0	0	424.954	1	1	57.5363	52.8438
DATA	962	12	27	0	0	A_42_P684885	NM_133517	4261	259.455	3.271624e+000	3.272998e+000	65	57	1.718488e+001	0	0	0	0	1	0	2.90431	0	0	65	59.9655
DATA	963	12	28	0	0	A_64_P102708	NM_001034149	4286.42	259.427	1.771501e+001	3.711202e+000	80	52	2.719587e+001	0	0	0	0	1	0	17.3092	1	1	65	60.6667
DATA	964	12	29	0	0	A_42_P547629	NM_001106718	4311.58	259.427	3.224301e+002	3.240774e+001	381.5	51	1.387665e+001	0	0	0	0	1	0	314.816	1	1	65	53.8065
DATA	965	12	30	0	0	A_42_P522285	NM_001044263	4337.11	259.5	2.835507e+002	2.854261e+001	327.5	50	1.636244e+001	0	0	0	0	0	0	276.586	1	1	56.9804	53.037
DATA	966	12	31	0	0	A_64_P164423	NM_057193	4362.5	259.5	1.721516e+001	3.695973e+000	79	47	1.939630e+001	0	0	0	0	0	0	16.7721	1	1	57.5363	51.7037
DATA	967	12	32	0	0	A_44_P256143	NM_001047917	4387.61	259.375	5.593609e+001	6.481936e+000	115	49	1.112836e+001	0	0	0	0	0	0	54.4193	1	1	48.2044	50.0741
DATA	968	12	33	0	0	A_44_P727294	NM_001160314	4413.09	258.672	1.696036e+003	1.696353e+002	1699	50	1.136530e+001	0	0	0	0	0	0	1647.27	1	1	45.1352	51.7931
DATA	969	12	34	0	0	A_64_P108404	NM_001000092	4438.58	259.427	4.445347e+001	5.528583e+000	106	43	1.487041e+001	0	0	0	0	0	0	43.0935	1	1	57.5363	46.0645
DATA	970	12	35	0	0	A_44_P520829	NM_001108777	4463.78	258.815	4.197719e+002	4.210623e+001	457.5	40	1.031107e+001	0	0	0	0	0	0	406.068	1	1	45.4864	41.5455
DATA	971	12	36	0	0	A_44_P229677	NM_001014221	4489.58	259.129	6.329481e+002	6.338087e+001	678.5	39.5	7.401455e+000	0	0	0	0	0	0	610.824	1	1	44.0646	39.3077
DATA	972	12	37	0	0	A_64_P126215	A_64_P126215	4514.67	259.5	1.728701e+001	3.734422e+000	80.5	44	7.881355e+000	0	0	0	0	0	0	16.6404	1	1	57.5363	43.5172
DATA	973	12	38	0	0	A_64_P090035	A_64_P090035	4540.12	259.613	1.037059e+004	1.037064e+003	9627	41	9.307950e+000	0	0	0	0	0	0	9954.8	1	1	49.1849	41.931
DATA	974	12	39	0	0	A_64_P089330	ENSRNOT00000012374	4565.5	259.5	9.298142e+001	9.876283e+000	149	42	1.445848e+001	0	0	0	0	0	0	88.9854	1	1	57.5363	44.9524
DATA	975	12	40	0	0	A_44_P454429	NM_012712	4590.15	259.569	9.277201e+001	9.860088e+000	152	42	1.075798e+001	0	0	0	0	0	0	88.5085	1	1	47.8731	42.9487
DATA	976	12	41	0	1	ERCC-00144_60	ERCC-00144_60	4616.28	258.985	1.457769e+001	3.654991e+000	75	39	8.083372e+000	0	0	0	0	0	0	13.8588	1	0	46.1809	40.1818
DATA	977	12	42	0	0	A_42_P759843	XR_086347	4641.64	259.13	1.283600e+003	1.284040e+002	1299	41	1.032059e+001	0	0	0	0	0	0	1215.9	1	1	46.8651	39.0833
DATA	978	12	43	0	0	A_43_P14264	NM_053653	4667.33	259.5	2.672314e+002	2.693564e+001	309	40	8.484394e+000	0	0	0	0	0	0	252.165	1	1	57.5363	40.4194
DATA	979	12	44	0	0	A_64_P011223	NM_024353	4692.3	258.964	1.667170e+002	1.701289e+001	219	43	1.034390e+001	0	0	0	0	0	0	156.699	1	1	42.5954	44.0606
DATA	980	12	45	0	0	A_42_P701169	NM_001109572	4718	259.545	7.920949e+002	7.928261e+001	819	47	9.844404e+000	0	0	0	0	0	0	741.376	1	1	55.8519	47.3333
DATA	981	12	46	0	0	A_64_P143307	NM_001014106	4743.67	259.577	3.450347e+002	3.467249e+001	387	46.5	9.923447e+000	0	0	0	0	0	0	321.529	1	1	50.1463	47.9063
DATA	982	12	47	0	0	A_44_P480636	NM_001005381	4768.53	259.425	1.457013e+002	1.496945e+001	199	46.5	9.717233e+000	0	0	0	0	0	0	135.178	1	1	48.8603	44.7692
DATA	983	12	48	0	0	A_64_P163564	ENSRNOT00000010609	4794.17	259.592	5.436662e+001	6.439245e+000	116	42.5	8.435284e+000	0	0	0	0	0	0	50.2041	1	1	47.5395	42.5333
DATA	984	12	49	0	0	A_42_P774028	NM_001017447	4819.37	259.382	1.371315e+003	1.371753e+002	1266.5	45.5	1.120041e+001	0	0	0	0	0	0	1260.31	1	1	46.5243	46.3333
DATA	985	12	50	0	0	A_43_P20110	ENSRNOT00000050558	4845	259.545	2.570411e+001	4.329821e+000	85.5	44.5	1.002875e+001	0	0	0	0	0	0	23.5065	1	1	55.8519	45.1
DATA	986	12	51	0	0	A_44_P552865	NM_001170399	4870.42	259.573	6.544102e+002	6.553465e+001	660	45	1.154491e+001	0	0	0	0	0	0	595.448	1	1	65	47.8519
DATA	987	12	52	0	0	A_43_P17428	NM_001012189	4895.5	259.463	1.976815e+002	2.007906e+001	239.5	50	1.571097e+001	0	0	0	0	1	0	178.957	1	1	50.4627	54.5625
DATA	988	12	53	0	0	A_64_P146222	TC633165	4920.93	259.732	1.414259e+004	1.414264e+003	12822	44	1.080048e+001	0	0	0	0	0	0	12736	1	1	47.5395	45.9583
DATA	989	12	54	0	0	A_64_P054856	NM_001135894	4946.38	259.973	2.281298e+002	2.308866e+001	267	41	8.046212e+000	0	0	0	0	0	0	204.347	1	1	49.1849	42.4706
DATA	990	12	55	0	0	A_64_P154982	ENSRNOT00000018118	4971.78	259.824	5.643809e+003	5.643923e+002	4994.5	41	7.202208e+000	0	0	0	0	0	0	5028.1	1	1	48.2044	42.2222
DATA	991	12	56	0	0	A_42_P726363	NM_031536	4997.5	260	1.673553e+001	3.966746e+000	77	39	8.958687e+000	0	0	0	0	0	0	14.8275	1	0	54.1152	40.25
DATA	992	12	57	0	0	A_64_P139685	A_64_P139685	5022.5	260	1.526593e+001	3.925059e+000	75.5	42	9.365026e+000	0	0	0	0	0	0	13.4522	1	0	54.1152	41.3704
DATA	993	12	58	0	0	A_64_P114104	NM_001034136	5047.93	259.8	3.029153e+003	3.029371e+002	2656	46	9.970126e+000	0	0	0	0	0	0	2654.43	1	1	46.8651	44.8182
DATA	994	12	59	0	0	A_42_P480273	A_42_P480273	5073.57	259.827	2.259495e+003	2.259790e+002	1972	45	8.412500e+000	0	0	0	0	0	0	1968.88	1	1	49.8279	45.5625
DATA	995	12	60	0	0	A_64_P004344	ENSRNOT00000047696	5098.84	259.897	4.749331e+003	4.749473e+002	4134	43	8.357378e+000	0	0	0	0	0	0	4115.6	1	1	46.5243	43.6563
DATA	996	12	61	0	0	A_42_P723584	NM_001109099	5124	259.797	1.821603e+003	1.821978e+002	1575	43	7.203998e+000	0	0	0	0	0	0	1569.85	1	1	46.8651	43.3158
DATA	997	12	62	0	0	A_64_P114813	A_64_P114813	5149.93	259.813	4.341972e+000	3.743626e+000	69	43	9.353662e+000	0	0	0	0	0	0	3.7208	1	0	48.8603	40.8108
DATA	998	12	63	0	0	A_64_P034551	NM_053818	5175.17	259.96	9.816951e+001	1.050478e+001	149.5	45.5	8.963291e+000	0	0	0	0	0	0	83.6677	1	1	47.8731	44.5833
DATA	999	12	64	0	0	A_42_P492976	NM_001126099	5200.08	259.901	2.553787e+002	2.581299e+001	277	38.5	8.990835e+000	0	0	0	0	0	0	216.496	1	1	46.8651	40.7941
DATA	1000	12	65	0	0	A_64_P141799	NM_001025709	5225.57	259.761	4.249604e+002	4.266373e+001	412	40.5	8.280164e+000	0	0	0	0	0	0	358.325	1	1	46.5243	41.6944
DATA	1001	12	66	0	0	A_44_P337088	NM_133609	5250.94	259.765	2.874557e+002	2.899550e+001	299	37.5	7.698647e+000	0	0	0	0	0	0	241.111	1	1	46.1809	38.9412
DATA	1002	12	67	0	0	A_64_P137961	A_64_P137961	5276.5	260	5.039526e+001	6.322806e+000	105.5	41.5	6.589260e+000	0	0	0	0	0	0	42.0529	1	1	54.1152	39.5313
DATA	1003	12	68	0	0	A_64_P053822	ENSRNOT00000028268	5302.09	260.386	7.893686e+001	8.777155e+000	128.5	41	6.774344e+000	0	0	0	0	0	0	65.5399	1	1	57.259	41.2593
DATA	1004	12	69	0	0	A_42_P484456	NM_001106601	5327.37	259.735	1.229076e+003	1.229681e+002	1087	42	1.016877e+001	0	0	0	1	0	0	1015.52	1	1	46.5243	43.7586
DATA	1005	12	70	0	0	A_44_P508632	NM_001107594	5352.58	260.427	1.146424e+001	4.040327e+000	72	42	5.894084e+000	0	0	0	0	0	0	9.42879	1	0	57.5363	42.1333
DATA	1006	12	71	0	0	A_64_P080598	NM_001047865	5378.42	260.427	3.230115e+001	5.057789e+000	87.5	47	8.816553e+000	0	0	0	0	0	0	26.4452	1	1	65	48.2727
DATA	1007	12	72	0	0	A_64_P144243	A_64_P144243	5403.22	260.708	2.204849e+001	4.487230e+000	79	45	7.761681e+000	0	0	0	0	0	0	17.9765	1	1	47.8731	43.1429
DATA	1008	12	73	0	0	A_44_P479917	NM_030864	5429.57	259.663	7.616744e+000	3.998098e+000	69	43	1.044112e+001	0	0	0	0	0	0	6.18364	1	0	51.0895	45.2727
DATA	1009	12	74	0	0	A_44_P974524	NM_001025764	5454.36	259.945	3.766772e+001	5.450364e+000	91	44	7.069915e+000	0	0	0	0	0	0	30.4687	1	1	42.5954	45.625
DATA	1010	12	75	0	0	A_42_P522899	NM_021578	5479.47	260.044	5.969383e+001	7.159529e+000	109	46.5	9.777358e+000	0	0	0	0	0	0	48.1189	1	1	46.8651	46.6053
DATA	1011	12	76	0	0	A_64_P069892	NM_019201	5504.85	259.603	1.273763e+004	1.273769e+003	9948	42	7.927582e+000	0	0	0	0	0	0	10234.7	1	1	46.5243	43.5714
DATA	1012	12	77	0	0	A_44_P415199	NM_001108748	5530.48	260.145	1.752898e+001	4.346153e+000	77	42.5	9.765115e+000	0	0	0	0	0	0	14.0444	1	0	47.2035	43.5667
DATA	1013	12	78	0	0	A_64_P034610	NM_022622	5556	260.455	1.041646e+002	1.115340e+001	142	41	9.514039e+000	0	0	0	0	0	0	83.2494	1	1	55.8519	41.7059
DATA	1014	12	79	0	0	A_42_P473828	ENSRNOT00000035309	5581.38	260.237	1.429268e+003	1.429827e+002	1160.5	44	8.937102e+000	0	0	0	1	0	0	1139.83	1	1	49.1849	41.5556
DATA	1015	12	80	66	1	DarkCorner	DarkCorner	5606.58	260.427	4.017252e+000	4.002348e+000	58	40.5	5.859352e+000	0	0	0	0	0	0	-3.79586	0	0	65	41.4643
DATA	1016	12	81	66	1	DarkCorner	DarkCorner	5632.33	260.5	4.022557e+000	4.007633e+000	59	37	7.580252e+000	0	0	0	0	0	0	-0.0734262	0	0	57.5363	37.9091
DATA	1017	12	82	66	1	DarkCorner	DarkCorner	5657.94	260.31	4.026064e+000	4.011127e+000	54	36	5.697540e+000	0	0	0	0	0	0	-6.28294	0	0	52.9257	36.125
DATA	1018	12	83	66	1	DarkCorner	DarkCorner	5682.54	260.862	4.027350e+000	4.012408e+000	61	40	8.872575e+000	0	0	0	0	0	0	-0.736324	0	0	51.7088	39.4516
DATA	1019	12	84	66	1	DarkCorner	DarkCorner	5708.64	260.538	4.026916e+000	4.011976e+000	58	39	7.953890e+000	0	0	0	0	0	0	-1.56264	0	0	49.8279	39.6667
DATA	1020	12	85	66	1	DarkCorner	DarkCorner	5733.67	260.5	4.024281e+000	4.015912e+000	61.5	36	8.477267e+000	0	0	0	0	0	0	1.82373	0	0	57.5363	36.7647
DATA	1021	13	1	66	1	DarkCorner	DarkCorner	3588.29	265.507	3.472749e+000	3.459972e+000	62	34	7.481335e+000	0	0	0	0	0	0	0.250895	0	0	46.1809	35.2378
DATA	1022	13	2	66	1	DarkCorner	DarkCorner	3613.5	266	3.458956e+000	3.446123e+000	58.5	39.5	9.590008e+000	0	0	0	0	0	0	-3.96024	0	0	65	39.4444
DATA	1023	13	3	66	1	DarkCorner	DarkCorner	3638.71	266.333	3.445421e+000	3.432638e+000	61	41	6.296830e+000	0	0	0	0	0	0	-0.35275	0	0	46.8651	40.8421
DATA	1024	13	4	66	1	DarkCorner	DarkCorner	3664.5	266	3.431937e+000	3.419204e+000	54	41	6.574025e+000	0	0	0	0	0	0	-6.71179	0	0	54.1152	40.303
DATA	1025	13	5	66	1	DarkCorner	DarkCorner	3690.42	265.697	3.418700e+000	3.406017e+000	57	41	7.488199e+000	0	0	0	0	0	0	-4.94311	0	0	45.835	41.1613
DATA	1026	13	6	0	0	A_64_P029912	NM_001109143	3714.5	266	1.085699e+002	1.137513e+001	163	40	1.089401e+001	0	0	0	0	0	0	101.928	1	1	48.5334	42.375
DATA	1027	13	7	0	0	A_42_P574731	NM_012948	3740.09	266.116	1.945538e+003	1.945832e+002	1823	43.5	8.741073e+000	0	0	0	0	0	0	1833.17	1	1	46.8651	44.2222
DATA	1028	13	8	0	0	A_44_P137448	NM_017043	3765.5	266	1.718083e+002	1.750821e+001	223	42.5	6.857834e+000	0	0	0	0	0	0	162.451	1	1	54.1152	42.2667
DATA	1029	13	9	0	0	A_42_P770614	NM_001013235	3791.39	266.069	2.093305e+004	2.093308e+003	20024.5	43	7.653197e+000	0	0	0	1	0	0	19861.1	1	1	53.8203	44
DATA	1030	13	10	0	0	A_42_P785419	NM_199501	3816.22	265.89	1.034353e+002	1.087181e+001	157	44	7.374567e+000	0	0	0	0	0	0	98.4491	1	1	47.8731	43.7931
DATA	1031	13	11	0	0	A_42_P581043	TC622715	3841.38	266	3.722405e+003	3.722554e+002	3447	42.5	7.521898e+000	0	0	0	0	0	0	3553.84	1	1	48.5334	40.5
DATA	1032	13	12	0	0	A_64_P098532	NM_001029928	3867.14	266.068	1.310688e+001	3.576423e+000	74.5	44	8.233764e+000	0	0	0	0	0	0	12.5507	1	0	44.0646	42.5556
DATA	1033	13	13	0	0	A_64_P090758	A_64_P090758	3892.4	266.208	9.950590e+002	9.956121e+001	1020	39	7.845372e+000	0	0	0	0	0	0	955.475	1	1	50.1463	39.6296
DATA	1034	13	14	0	0	A_43_P12079	NM_021583	3918.37	266.404	4.830623e+001	5.855614e+000	109	39.5	8.487502e+000	0	0	0	0	0	0	46.5084	1	1	57.8122	39.5526
DATA	1035	13	15	0	0	A_64_P001947	A_64_P001947	3943.5	266.352	7.451134e+000	3.384679e+000	70	38	8.153967e+000	0	0	0	0	0	0	7.19106	1	0	65	39.4444
DATA	1036	13	16	0	0	A_64_P064461	A_64_P064461	3969	266.455	3.975930e+001	5.163324e+000	99	43	8.896131e+000	0	0	0	0	0	0	38.458	1	1	55.8519	42.4324
DATA	1037	13	17	0	0	A_42_P575398	NM_020538	3994.4	266.183	7.059461e+000	3.362432e+000	69	41.5	7.802879e+000	0	0	0	0	0	0	6.84239	1	0	42.9674	41.4722
DATA	1038	13	18	0	0	A_42_P482623	NM_199463	4019.43	265.701	8.370070e+002	8.376500e+001	884.5	40	1.371117e+001	0	0	0	0	0	0	812.748	1	1	46.1809	43.2174
DATA	1039	13	19	0	0	A_42_P738431	NM_019175	4044.63	265.735	1.506658e+003	1.507014e+002	1543	41	8.810994e+000	0	0	0	0	0	0	1465.39	1	1	46.5243	40.8857
DATA	1040	13	20	0	0	A_44_P1027780	ENSRNOT00000065815	4070.9	265.869	2.076196e+001	3.874513e+000	83	40	1.009782e+001	0	0	0	0	0	0	20.2233	1	1	45.1352	39.1818
DATA	1041	13	21	0	0	A_42_P479802	NM_053679	4095.67	266.5	7.773142e+002	7.780006e+001	831	44	7.881106e+000	0	0	0	0	0	0	758.051	1	1	57.5363	42.6129
DATA	1042	13	22	0	0	A_44_P496624	NM_022302	4121.42	266.427	4.250058e+001	5.358829e+000	103.5	49	1.007557e+001	0	0	0	0	0	0	41.4895	1	1	57.5363	49.0357
DATA	1043	13	23	0	0	A_42_P700753	FQ212883	4146.41	266.37	8.870141e+002	8.876136e+001	917	44	8.360457e+000	0	0	0	0	0	0	866.577	1	1	48.5334	43.4783
DATA	1044	13	24	0	0	A_44_P229299	NM_001100678	4171.5	266.5	3.592784e+002	3.607542e+001	414	54	1.109644e+001	0	0	0	0	1	0	351.194	1	1	49.1849	54.2
DATA	1045	13	25	0	0	A_42_P728472	NM_001007600	4197.17	266	7.583127e+003	7.583197e+002	7456	47.5	1.253536e+001	0	0	0	0	0	0	7414.93	1	1	46.8651	51
DATA	1046	13	26	0	0	A_42_P488904	NM_001108947	4222.38	266.237	4.548280e+003	4.548397e+002	4325.5	42.5	7.650937e+000	0	0	0	0	0	0	4447.83	1	1	49.1849	44.3
DATA	1047	13	27	0	0	A_42_P458494	NM_001034951	4248.33	266.5	5.542576e+001	6.429619e+000	118	54.5	1.140670e+001	0	0	0	0	1	0	54.1942	1	1	65	55.125
DATA	1048	13	28	0	0	A_64_P100331	ENSRNOT00000048614	4273.5	266.5	2.044279e+001	3.847959e+000	81	52	1.618008e+001	0	0	0	0	1	0	19.9812	1	1	57.5363	54.1111
DATA	1049	13	29	0	0	A_64_P113989	NM_181631	4298.81	266.467	4.968671e+003	4.968778e+002	4832	53.5	2.720982e+001	0	0	0	0	1	0	4853.53	1	1	49.5074	61.3214
DATA	1050	13	30	0	0	A_64_P042105	ENSRNOT00000061599	4324.5	266.5	2.918473e+001	4.379066e+000	91	50	1.517958e+001	0	0	0	0	0	0	28.4841	1	1	65	52.8333
DATA	1051	13	31	0	0	A_64_P044435	NM_001015020	4349.63	266.447	2.774341e+002	2.793525e+001	335	49	1.186732e+001	0	0	0	0	0	0	270.485	1	1	49.8279	50.2
DATA	1052	13	32	0	0	A_64_P149011	NM_031352	4375.07	266.598	2.128951e+003	2.129202e+002	2146	51	2.343658e+001	0	0	0	0	1	0	2072.9	1	1	51.0895	55.8387
DATA	1053	13	33	0	0	A_42_P580844	NM_019296	4400.58	266.573	1.350902e+002	1.390096e+001	199	45	1.095350e+001	0	0	0	0	0	0	131.33	1	1	57.5363	47.6667
DATA	1054	13	34	0	0	A_64_P052972	A_64_P052972	4426	266.545	9.594418e+001	1.014072e+001	156	49	1.446535e+001	0	0	0	0	0	0	93.1075	1	1	55.8519	52.6061
DATA	1055	13	35	0	0	A_44_P454300	NM_001003979	4451.54	266.657	3.302365e+000	3.297023e+000	64	39	7.371583e+000	0	0	0	0	0	0	2.06629	0	0	46.5243	39.0667
DATA	1056	13	36	0	0	A_44_P149743	ENSRNOT00000005476	4476.58	266.573	1.855467e+001	3.783574e+000	81	40	1.042437e+001	0	0	0	0	0	0	17.9302	1	1	57.5363	42.1034
DATA	1057	13	37	0	0	A_42_P841017	NM_173309	4501.87	266.434	3.273906e+003	3.274073e+002	3214	40	6.979562e+000	0	0	0	0	0	0	3155.99	1	1	49.5074	40
DATA	1058	13	38	0	0	A_44_P206844	NM_013074	4527.58	266.573	7.537970e+001	8.234461e+000	134	40	8.281769e+000	0	0	0	0	0	0	72.4683	1	1	57.5363	41.1563
DATA	1059	13	39	0	0	A_64_P073400	NM_001000705	4553	266.545	1.198257e+002	1.243508e+001	181.5	41	6.806125e+000	0	0	0	0	0	0	114.864	1	1	55.8519	41.36
DATA	1060	13	40	0	0	A_64_P066676	A_64_P066676	4578.42	266.573	1.703368e+001	3.744264e+000	80	45	1.443864e+001	0	0	0	0	0	0	16.2778	1	1	57.5363	44.7391
DATA	1061	13	41	0	0	A_44_P386965	NM_001134594	4603.58	266.573	8.377829e+000	3.448636e+000	72	42	6.974917e+000	0	0	0	0	0	0	7.97983	1	0	57.5363	41.129
DATA	1062	13	42	0	0	A_64_P095895	NM_019338	4629.37	266.596	3.869538e+001	5.122946e+000	101	39	9.459504e+000	0	0	0	0	0	0	36.726	1	1	57.8122	37.8696
DATA	1063	13	43	1028	1	(+)E1A_r60_a22	E1A_r60_a22	4654.57	266.355	1.515756e+002	1.552759e+001	202.5	40	8.351647e+000	0	0	0	0	0	0	143.332	1	1	49.8279	39
DATA	1064	13	44	0	0	A_42_P541625	NM_001126090	4679.73	266.781	1.075117e+004	1.075122e+003	10012.5	40.5	8.707094e+000	0	0	0	0	0	0	10127.5	1	1	48.2044	41.4643
DATA	1065	13	45	0	0	A_64_P033895	NM_001126084	4704.89	266.8	5.946265e+001	6.847835e+000	116	46	8.820872e+000	0	0	0	0	0	0	55.7879	1	1	45.835	45.4048
DATA	1066	13	46	0	0	A_64_P012546	NM_022300	4730.5	267	3.887001e+004	3.887002e+003	36074.5	47	8.579796e+000	0	0	0	0	0	0	36312.5	1	1	54.1152	46.7097
DATA	1067	13	47	0	0	A_42_P495598	NM_001014026	4756.09	266.935	8.728609e+000	3.535449e+000	71	46	9.492223e+000	0	0	0	0	0	0	8.11816	1	0	65	46.3667
DATA	1068	13	48	0	0	A_42_P483463	NM_001130999	4781.24	267	1.713032e+003	1.713377e+002	1655	43	7.640106e+000	0	0	0	0	0	0	1586.05	1	1	46.8651	41.6061
DATA	1069	13	49	0	0	A_42_P575104	NM_153737	4807.06	266.58	6.235657e+001	7.130333e+000	117	41.5	7.245506e+000	0	0	0	0	0	0	57.4579	1	1	46.1809	41.8571
DATA	1070	13	50	0	0	A_42_P461726	NM_133549	4832.4	266.941	1.526264e+001	3.795202e+000	75	42	6.173018e+000	0	0	0	0	0	0	13.996	1	0	46.5243	40.8846
DATA	1071	13	51	0	0	A_64_P098688	A_64_P098688	4857.5	267	4.753272e+004	4.753274e+003	43419.5	45	1.087981e+001	0	0	0	0	0	0	43374.4	1	1	54.1152	45.7037
DATA	1072	13	52	0	0	A_64_P105797	A_64_P105797	4883	267	4.024691e+001	5.340086e+000	96	45	1.534927e+001	0	0	0	0	0	0	36.539	1	1	54.9904	50
DATA	1073	13	53	0	0	A_42_P545943	NM_019291	4908.31	267.014	4.675600e+003	4.675733e+002	4241	44.5	1.562130e+001	0	0	0	0	0	0	4222.94	1	1	47.2035	50.1071
DATA	1074	13	54	0	0	A_44_P520045	NM_001001371	4933.61	267.069	9.648660e+001	1.027982e+001	149	41	8.349339e+000	0	0	0	0	0	0	86.6884	1	1	53.8203	43.5652
DATA	1075	13	55	0	0	A_44_P306964	NM_001012184	4959.5	267	2.162844e+001	4.170647e+000	83	41	6.033745e+000	0	0	0	0	0	0	19.3261	1	1	54.1152	41.4643
DATA	1076	13	56	0	0	A_44_P156043	NM_001039012	4984.51	267.174	8.353063e+002	8.360753e+001	838.5	41	7.472171e+000	0	0	0	0	0	0	742.413	1	1	47.2035	40.4
DATA	1077	13	57	0	0	A_64_P054686	TC585752	5009.73	266.643	1.318308e+004	1.318313e+003	11427.5	39.5	9.576333e+000	0	0	0	0	0	0	11653.1	1	1	46.8651	41.1154
DATA	1078	13	58	0	0	A_42_P575104	NM_153737	5035.24	266.667	5.991132e+001	7.002362e+000	115.5	45	9.703157e+000	0	0	0	0	0	0	52.6649	1	1	45.4864	42.7143
DATA	1079	13	59	0	0	A_64_P142194	NM_053426	5060.79	267	1.058321e+003	1.058948e+002	999	47	1.024375e+001	0	0	0	0	0	0	925.15	1	1	46.8651	45.9688
DATA	1080	13	60	0	0	A_64_P043314	A_64_P043314	5086.48	266.6	2.426013e+001	4.395796e+000	85	43	8.083124e+000	0	0	0	0	0	0	21.088	1	1	45.4864	44.7647
DATA	1081	13	61	0	0	A_44_P684315	NM_001109104	5111.5	267	1.860457e+004	1.860461e+003	15714.5	44	6.313284e+000	0	0	0	0	0	0	16083.9	1	1	48.5334	43.6296
DATA	1082	13	62	0	0	A_64_P142620	NM_201417	5137	267.455	4.266193e+001	5.651242e+000	101	41	8.627974e+000	0	0	0	0	0	0	36.6783	1	1	55.8519	41.2619
DATA	1083	13	63	0	0	A_42_P568419	NM_001011894	5162.4	267.147	1.157066e+003	1.157666e+002	1045	43	9.496694e+000	0	0	0	0	0	0	989.298	1	1	48.8603	43.5172
DATA	1084	13	64	0	0	A_42_P519868	NM_053906	5187.72	267.29	1.496770e+002	1.542960e+001	193	40	9.508131e+000	0	0	0	1	0	0	127.282	1	1	46.8651	42.4074
DATA	1085	13	65	0	0	A_43_P12346	NM_022943	5213.42	267.427	9.054436e+001	9.806970e+000	134	40	9.015579e+000	0	0	0	0	0	0	76.5794	1	1	65	41.6857
DATA	1087	13	67	0	0	A_44_P556989	NM_012610	5263.89	267.5	4.624783e+001	5.990093e+000	101	42	6.468800e+000	0	0	0	0	0	0	38.7096	1	1	56.9804	40.0857
DATA	1088	13	68	0	0	A_64_P113079	XM_218149	5289.71	267.246	3.840882e+000	3.836985e+000	66	41	6.677709e+000	0	0	0	0	0	0	2.34552	0	0	44.4243	40.1176
DATA	1089	13	69	0	0	A_64_P003937	NM_173111	5314.57	267.347	3.270537e+003	3.270763e+002	2805	40.5	6.435101e+000	0	0	0	0	0	0	2710.27	1	1	48.2044	38.6
DATA	1090	13	70	0	0	A_42_P771337	NM_001012015	5340.11	267.54	6.875853e+001	7.886947e+000	118	42.5	7.551704e+000	0	0	0	0	0	0	56.7084	1	1	44.0646	42.9375
DATA	1091	13	71	0	0	A_44_P401035	A_44_P401035	5365.66	267.839	3.761768e+001	5.405079e+000	94	44	8.121860e+000	0	0	0	0	0	0	30.8832	1	1	44.4243	43.7308
DATA	1092	13	72	0	0	A_42_P536292	NM_033359	5390.59	267.833	4.561444e+002	4.578068e+001	436	48	9.574793e+000	0	0	0	0	0	0	372.88	1	1	50.1463	48.48
DATA	1093	13	73	0	0	A_44_P128564	NM_001109121	5416.42	267.573	1.214175e+002	1.275717e+001	159.5	43	1.076140e+001	0	0	0	0	0	0	98.8342	1	1	57.5363	43.5676
DATA	1094	13	74	0	0	A_64_P069957	NM_173315	5441.58	267.573	1.472749e+001	4.196559e+000	69	43	7.458127e+000	0	0	0	0	0	0	11.942	1	0	65	45.0968
DATA	1095	13	75	0	0	A_44_P538691	NM_031772	5467.31	267.5	6.028079e+001	7.203751e+000	109	48	7.805421e+000	0	0	0	0	0	0	48.6997	1	1	47.8731	48.0357
DATA	1096	13	76	0	0	A_44_P499231	NM_001034148	5492.32	267.091	2.830089e+002	2.857622e+001	285	45.5	1.023494e+001	0	0	0	0	0	0	227.88	1	1	45.835	46.0667
DATA	1097	13	77	0	0	A_64_P121489	XM_001065883	5517.67	267.5	9.045801e+000	4.070886e+000	69	40	7.502413e+000	0	0	0	0	0	0	7.26197	1	0	65	40.3
DATA	1098	13	78	0	0	A_42_P507072	FQ213070	5543.19	267.608	1.887773e+003	1.888193e+002	1595	41	1.090649e+001	0	0	0	0	0	0	1511.43	1	1	49.1849	43.5185
DATA	1099	13	79	0	0	A_64_P120075	ENSRNOT00000027841	5568.63	267.5	2.189123e+002	2.225172e+001	235	39	7.812189e+000	0	0	0	0	0	0	174.861	1	1	47.8731	38.0303
DATA	1100	13	80	0	0	A_44_P1007362	NM_138864	5594	267.545	1.153757e+002	1.221025e+001	152.5	40	7.462473e+000	0	0	0	0	0	0	91.9814	1	1	55.8519	40.6333
DATA	1101	13	81	66	1	DarkCorner	DarkCorner	5619.39	267.219	4.017925e+000	4.003018e+000	52.5	38	7.285024e+000	0	0	0	0	0	0	-7.46912	0	0	44.7812	38.3438
DATA	1102	13	82	66	1	DarkCorner	DarkCorner	5644.84	267.591	4.022165e+000	4.007243e+000	56	37	9.110538e+000	0	0	0	0	0	0	-4.43853	0	0	54.4085	38.5758
DATA	1103	13	83	66	1	DarkCorner	DarkCorner	5670.23	268.133	4.024470e+000	4.009539e+000	55	38	7.353148e+000	0	0	0	0	0	0	-4.73629	0	0	48.2044	36.9286
DATA	1104	13	84	66	1	DarkCorner	DarkCorner	5695.69	267.702	4.025117e+000	4.010184e+000	59	40.5	9.264139e+000	0	0	0	0	0	0	-0.727788	0	0	51.4001	39.7917
DATA	1105	13	85	66	1	DarkCorner	DarkCorner	5720.77	267.699	4.662109e+000	4.035655e+000	64.5	36	8.146488e+000	0	0	0	0	0	0	3.70584	1	0	48.5334	36.6905
DATA	1106	14	1	66	1	DarkCorner	DarkCorner	3600.33	273.384	3.465060e+000	3.452204e+000	57	36	8.873227e+000	0	0	0	0	0	0	-3.14763	0	0	48.5334	37.1731
DATA	1107	14	2	66	1	DarkCorner	DarkCorner	3626.11	273.5	3.451212e+000	3.438408e+000	59	42	9.687704e+000	0	0	0	0	0	0	-2.0098	0	0	56.9804	41.5806
DATA	1108	14	3	66	1	DarkCorner	DarkCorner	3651.07	273.033	3.438119e+000	3.425363e+000	55	41	6.327997e+000	0	0	0	0	0	0	-3.76858	0	0	53.5237	41.8919
DATA	1109	14	4	66	1	DarkCorner	DarkCorner	3676.95	273.759	3.424691e+000	3.411985e+000	57	42	7.107786e+000	0	0	0	0	0	0	-2.25322	0	0	53.2255	42.4211
DATA	1110	14	5	66	1	DarkCorner	DarkCorner	3702.42	273.427	3.411936e+000	3.399278e+000	60.5	44.5	6.169503e+000	0	0	0	0	0	0	-1.29702	0	0	57.5363	43.4091
DATA	1111	14	6	0	0	A_64_P151415	NM_001191684	3727.32	273.274	1.396724e+002	1.437209e+001	193	36	4.988877e+000	0	0	0	0	0	0	131.393	1	1	48.2044	37
DATA	1112	14	7	0	0	A_42_P475623	NM_053394	3752.49	273.408	2.687439e+002	2.708553e+001	307	40	7.521740e+000	0	0	0	0	0	0	253.702	1	1	47.8731	40.9189
DATA	1113	14	8	0	0	A_44_P123636	ENSRNOT00000023689	3777.99	273.884	6.978431e+000	3.435358e+000	66	44	7.625838e+000	0	0	0	0	0	0	6.61054	1	0	46.8651	43.8182
DATA	1114	14	9	0	0	A_64_P135207	ENSRNOT00000043866	3803.67	273.5	1.750194e+002	1.782015e+001	226	43	1.121948e+001	0	0	0	0	0	0	166.344	1	1	57.5363	44.72
DATA	1115	14	10	0	0	A_42_P516693	NM_001107330	3829.33	273.5	3.354382e+000	3.342247e+000	60.5	40.5	7.027528e+000	0	0	0	0	0	0	0.434276	0	0	57.5363	40.8846
DATA	1116	14	11	0	0	A_64_P125447	NM_001109231	3854.2	272.971	6.672079e+001	7.457873e+000	125.5	45	1.006871e+001	0	0	0	0	0	0	63.8024	1	1	46.8651	45.9259
DATA	1117	14	12	0	0	A_42_P701756	NM_001107646	3879.68	273.254	1.064273e+003	1.064791e+002	1070	41.5	7.361375e+000	0	0	0	0	0	0	1020.64	1	1	47.5395	42.1471
DATA	1118	14	13	0	0	A_44_P344181	NM_017204	3905.19	273.519	2.900048e+002	2.918918e+001	343	42	8.264863e+000	0	0	0	0	0	0	278.867	1	1	49.8279	41.5526
DATA	1119	14	14	0	0	A_64_P035330	ENSRNOT00000066415	3930.57	273.392	4.308100e+002	4.320761e+001	470	40	7.757564e+000	0	0	0	0	0	0	415.303	1	1	49.1849	39.4138
DATA	1120	14	15	0	0	A_42_P837533	NM_001134546	3955.87	273.5	2.858053e+003	2.858244e+002	2791.5	43	1.003122e+001	0	0	0	0	0	0	2761.58	1	1	49.8279	42.0556
DATA	1121	14	16	0	0	A_42_P744291	NM_001025729	3981.12	273.603	9.315651e+002	9.321461e+001	943.5	44	9.002600e+000	0	0	0	0	0	0	902.042	1	1	48.5334	44.2414
DATA	1122	14	17	0	0	A_44_P149267	NM_001013099	4006.81	273.559	1.676317e+001	3.687290e+000	78.5	38	8.865422e+000	0	0	0	0	0	0	16.2639	1	1	42.9674	38.9355
DATA	1123	14	18	0	0	A_64_P002546	NM_144741	4032.22	273.269	3.290703e+000	3.287898e+000	64	39.5	9.712180e+000	0	0	0	0	0	0	2.41513	0	0	49.8279	39.8667
DATA	1124	14	19	0	0	A_42_P808236	NM_001107189	4057.58	273.573	2.819609e+001	4.320377e+000	91	42	8.731719e+000	0	0	0	0	0	0	27.4463	1	1	57.5363	40.3846
DATA	1125	14	20	0	0	A_44_P425848	NM_001108747	4082.94	273.464	2.255819e+002	2.279384e+001	282	42	8.321482e+000	0	0	0	0	0	0	219.875	1	1	47.5395	41.6
DATA	1126	14	21	0	0	A_43_P17405	TC612613	4108.5	273.648	1.512705e+002	1.547549e+001	209	46.5	8.222453e+000	0	0	0	0	0	0	147.609	1	1	57.5363	46.1389
DATA	1127	14	22	0	0	A_64_P022402	NM_001142304	4134	273.545	1.365248e+001	3.536665e+000	75	46	1.077456e+001	0	0	0	0	0	0	13.3339	1	0	55.8519	45.6552
DATA	1128	14	23	0	0	A_44_P1019726	ENSRNOT00000025138	4159.42	273.573	8.730025e+001	9.318972e+000	147.5	47	1.425950e+001	0	0	0	0	0	0	85.3202	1	1	57.5363	47.8
DATA	1129	14	24	0	0	A_44_P128186	NM_053305	4183.46	273.471	8.185056e+001	8.809998e+000	146	54.5	1.128871e+001	0	0	0	0	0	0	80.0278	1	1	52.9257	52.7778
DATA	1130	14	25	0	0	A_44_P203665	NM_001105725	4210.37	273.596	1.302889e+002	1.343012e+001	188	45.5	1.016756e+001	0	0	0	0	0	0	127.417	1	1	57.8122	47
DATA	1131	14	26	0	0	A_42_P688802	DV723748	4235.06	273.687	1.542500e+003	1.542844e+002	1534	53	1.058058e+001	0	0	0	0	0	0	1508.47	1	1	45.835	51.4444
DATA	1132	14	27	0	0	A_64_P129943	NM_001105712	4260.63	273.557	3.335184e+002	3.351070e+001	390	58.5	1.725133e+001	0	0	0	0	1	0	326.079	1	1	46.8651	60.8571
DATA	1133	14	28	0	0	A_64_P017577	NM_001106982	4286.5	274	2.452399e+001	4.080003e+000	86	50.5	1.359448e+001	0	0	0	0	0	0	23.9652	1	1	54.1152	52.125
DATA	1134	14	29	0	0	A_44_P235926	NM_024138	4311.5	274	2.556375e+002	2.577116e+001	304.5	47	1.438974e+001	0	0	0	0	0	0	249.635	1	1	54.1152	52.2308
DATA	1135	14	30	0	0	A_42_P611638	NM_001034137	4336.46	273.835	7.622610e+002	7.629603e+001	778	48.5	1.067304e+001	0	0	0	0	0	0	743.667	1	1	49.5074	47.9231
DATA	1136	14	31	0	0	A_42_P654878	NM_001107919	4362.5	274	1.090333e+003	1.090823e+002	1149	48	1.905944e+001	0	0	0	0	1	0	1062.44	1	1	54.1152	54.0645
DATA	1137	14	32	0	0	A_64_P017464	NM_001135687	4388	274	3.286915e+000	3.279074e+000	64	50	2.260783e+001	0	0	0	0	1	0	1.64374	0	0	54.9904	56.037
DATA	1138	14	33	0	0	A_64_P152873	NM_001207022	4413.5	274	5.865345e+001	6.720252e+000	122	44.5	1.162041e+001	0	0	0	0	0	0	56.9768	1	1	54.1152	45.7647
DATA	1139	14	34	0	0	A_64_P013243	A_64_P013243	4438.33	273.667	2.524005e+003	2.524219e+002	2512	39	1.359712e+001	0	0	0	0	0	0	2447.33	1	1	46.8651	42.8077
DATA	1140	14	35	0	0	A_64_P029720	NM_001109405	4463.74	273.629	1.005084e+002	1.057660e+001	163	40	1.132188e+001	0	0	0	0	0	0	97.2494	1	1	44.4243	41.4194
DATA	1141	14	36	0	0	A_43_P13459	NM_001107548	4489.15	273.785	1.374217e+002	1.413305e+001	196.5	39	1.071780e+001	0	0	0	0	0	0	132.656	1	1	45.835	41.6061
DATA	1142	14	37	0	0	A_64_P053923	NM_001107323	4514.51	273.959	6.095237e+002	6.104214e+001	658.5	39	7.074716e+000	0	0	0	0	0	0	586.888	1	1	48.5334	40.5806
DATA	1143	14	38	0	0	A_44_P1005199	ENSRNOT00000032786	4540.2	273.985	2.924437e+001	4.423281e+000	90	40	9.311740e+000	0	0	0	0	0	0	28.0794	1	1	46.8651	40.7692
DATA	1144	14	39	0	0	A_44_P104821	NM_024369	4565.31	273.986	1.024670e+002	1.077372e+001	160	43	1.183091e+001	0	0	0	0	0	0	98.0951	1	1	46.5243	43.4483
DATA	1145	14	40	0	0	A_64_P009956	A_64_P009956	4591.09	274.386	1.662404e+002	1.695608e+001	223	40.5	7.942393e+000	0	0	0	0	0	0	158.634	1	1	57.259	40.7667
DATA	1146	14	41	0	0	A_64_P060947	NM_203334	4616.5	274.352	5.452873e+001	6.400011e+000	118.5	43	7.136426e+000	0	0	0	0	0	0	51.857	1	1	57.5363	43.1429
DATA	1147	14	42	0	0	A_64_P103419	NM_001106291	4641.4	273.935	6.404317e+000	3.422884e+000	69	40	8.603595e+000	0	0	0	0	0	0	6.06903	1	0	44.0646	37.9143
DATA	1148	14	43	0	0	A_44_P220827	NM_001012051	4666.97	273.941	5.235482e+002	5.246350e+001	553	41	8.570812e+000	0	0	0	0	0	0	494.253	1	1	46.8651	39.2
DATA	1149	14	44	0	1	ETG07_105829	ETG07_105829	4692.58	274.427	9.219698e+000	3.511933e+000	71	42	8.871736e+000	0	0	0	0	0	0	8.66917	1	0	57.5363	42.4
DATA	1150	14	45	0	0	A_42_P719478	NM_001191779	4718	274.455	1.159277e+001	3.594886e+000	73	46	7.202954e+000	0	0	0	0	0	0	10.8554	1	0	55.8519	46.9444
DATA	1151	14	46	0	0	A_42_P462257	NM_001109481	4743.06	274.389	7.415430e+003	7.415509e+002	6814	49.5	9.177684e+000	0	0	0	0	0	0	6914.3	1	1	48.2044	47.3333
DATA	1152	14	47	0	0	A_44_P105634	NM_001007658	4768.72	274.122	1.566633e+002	1.603803e+001	205	44	1.015461e+001	0	0	0	0	0	0	145.416	1	1	48.8603	43.871
DATA	1153	14	48	0	0	A_64_P100594	NM_001000360	4794.23	274.015	6.960052e+001	7.767680e+000	129	46	8.318034e+000	0	0	0	0	0	0	64.3042	1	1	45.4864	44.6944
DATA	1154	14	49	0	0	A_64_P004266	A_64_P004266	4819.37	273.867	1.141597e+001	3.648371e+000	73	40.5	9.567726e+000	0	0	0	0	0	0	10.4976	1	0	43.7019	42.1
DATA	1155	14	50	0	0	A_44_P156343	NM_001000102	4845	274.455	7.790643e+000	3.568327e+000	70	43	7.108039e+000	0	0	0	0	0	0	7.12877	1	0	55.8519	42.2963
DATA	1156	14	51	0	0	A_42_P504358	NM_001108674	4870.42	274.427	2.564437e+002	2.588208e+001	292.5	45	1.225149e+001	0	0	0	0	0	0	233.482	1	1	57.5363	45.0323
DATA	1157	14	52	0	0	A_44_P281468	NM_001127556	4895.67	274.5	1.930406e+001	4.012511e+000	83	43	1.593885e+001	0	0	0	0	0	0	17.4863	1	1	57.5363	49.2414
DATA	1158	14	53	0	0	A_43_P12785	NM_053364	4920.82	274.279	5.245446e+000	3.574617e+000	69	40	7.608662e+000	0	0	0	0	0	0	4.72694	1	0	46.1809	39.7407
DATA	1159	14	54	0	0	A_64_P053297	NM_001107278	4946.32	274.551	9.525326e+002	9.531957e+001	932.5	41	6.343095e+000	0	0	0	0	0	0	853.824	1	1	50.1463	42.1212
DATA	1160	14	55	0	0	A_64_P062986	NM_001001018	4971.89	274.5	1.894958e+001	4.045379e+000	79	41	7.458776e+000	0	0	0	0	0	0	16.894	1	1	56.9804	41.2333
DATA	1161	14	56	0	0	A_44_P529226	NM_023091	4997.42	274.573	3.607088e+000	3.594332e+000	63	38	6.967173e+000	0	0	0	0	0	0	0.595034	0	0	57.5363	37.7826
DATA	1162	14	57	0	0	A_42_P559737	NM_020074	5022.57	274.389	9.742330e+002	9.749028e+001	942	45	9.461677e+000	0	0	0	0	0	0	859.121	1	1	48.2044	43.76
DATA	1163	14	58	0	0	A_44_P1017458	NM_199402	5048.11	274.5	7.542509e+001	8.372064e+000	129.5	44	9.188113e+000	0	0	0	0	0	0	66.1449	1	1	65	43.4167
DATA	1164	14	59	0	0	A_44_P407750	NM_001127680	5073.5	274.5	6.110278e+002	6.121192e+001	604	46	9.245667e+000	0	0	0	0	0	0	532.885	1	1	57.5363	45.4
DATA	1165	14	60	0	0	A_64_P033872	NM_001037353	5098.89	274.5	1.228145e+001	3.873832e+000	73	43	7.575391e+000	0	0	0	0	0	0	10.6515	1	0	56.9804	43.7143
DATA	1166	14	61	0	0	A_42_P472699	NM_001108061	5123.69	274.581	3.563392e+001	5.132513e+000	94	45.5	7.126812e+000	0	0	0	0	0	0	30.7382	1	1	44.0646	44.2353
DATA	1167	14	62	0	0	A_44_P201215	ENSRNOT00000014231	5149.55	274.522	2.367152e+001	4.404824e+000	84	41.5	1.130709e+001	0	0	0	0	0	0	20.3049	1	1	46.5243	42.2941
DATA	1168	14	63	0	0	A_64_P129910	NM_001107648	5174.73	274.533	2.830082e+002	2.854621e+001	306	44.5	9.598831e+000	0	0	0	0	0	0	241.446	1	1	49.1849	45.2857
DATA	1169	14	64	0	0	A_64_P027927	NM_022255	5200.42	274.573	6.565440e+001	7.563590e+000	118	40	9.961384e+000	0	0	0	0	0	0	55.7071	1	1	57.5363	42.6667
DATA	1170	14	65	0	0	A_64_P101623	A_64_P101623	5225.81	274.533	1.621164e+004	1.621169e+003	13871	39	7.151423e+000	0	0	0	0	0	0	13682.2	1	1	49.5074	39.4286
DATA	1171	14	66	0	0	A_42_P645110	NM_001029919	5250.93	274.493	1.419946e+004	1.419951e+003	11534	39.5	7.815862e+000	0	0	0	0	0	0	11922.1	1	1	48.5334	39.4063
DATA	1172	14	67	0	0	A_64_P017781	NM_001010956	5276.57	274.686	6.938767e+001	7.918231e+000	122	42	6.361719e+000	0	0	0	0	0	0	57.9593	1	1	47.2035	41.027
DATA	1173	14	68	0	0	A_64_P057106	NM_001004087	5302	274.545	7.352258e+001	8.291800e+000	128	40	5.595053e+000	0	0	0	0	0	0	61.1066	1	1	55.8519	39.2308
DATA	1174	14	69	0	0	A_44_P187005	NM_022238	5327.5	274.648	4.851763e+001	6.195241e+000	104	41	8.745695e+000	0	0	0	0	0	0	40.1294	1	1	57.5363	42.7778
DATA	1175	14	70	0	0	A_42_P779933	NM_017117	5352.94	274.899	1.407115e+001	4.118260e+000	74.5	44	6.729859e+000	0	0	0	0	0	0	11.5844	1	0	46.8651	43.5714
DATA	1176	14	71	0	0	A_42_P555701	NM_001107554	5378.22	274.824	6.769946e+003	6.770058e+002	5604.5	45	1.019281e+001	0	0	0	0	0	0	5548.75	1	1	48.2044	44.68
DATA	1177	14	72	0	0	A_42_P705302	NM_001107361	5403.59	274.905	4.129810e+003	4.129995e+002	3363	43	9.270085e+000	0	0	0	1	0	0	3370.51	1	1	48.8603	43.3704
DATA	1178	14	73	0	0	A_64_P015435	A_64_P015435	5429	274.797	1.637066e+004	1.637071e+003	13631	43	9.151965e+000	0	0	0	0	0	0	13307.1	1	1	46.8651	42.3824
DATA	1179	14	74	0	0	A_64_P036217	NM_001000569	5455.08	274.613	4.612621e+001	6.063172e+000	99	43	8.203493e+000	0	0	0	0	0	0	37.3492	1	1	44.0646	44.3784
DATA	1180	14	75	0	0	A_44_P543511	NM_001024749	5480.09	274.896	1.552907e+003	1.553409e+002	1335	47	6.582806e+000	0	0	0	0	0	0	1253.15	1	1	46.8651	47.6
DATA	1181	14	76	0	0	A_42_P759043	NM_001134509	5505.07	274.8	3.206408e+002	3.230781e+001	308	43	1.040214e+001	0	0	0	0	0	0	257.938	1	1	46.8651	44.7273
DATA	1182	14	77	0	0	A_42_P679982	NM_001107835	5530.31	274.986	2.611836e+003	2.612138e+002	2152	40	8.713776e+000	0	0	0	1	0	0	2095.16	1	1	47.2035	41.3214
DATA	1183	14	78	0	0	A_43_P18064	NM_001106904	5556	275	2.001348e+001	4.456881e+000	77	40	9.392376e+000	0	0	0	0	0	0	16.0138	1	1	54.9904	39.9063
DATA	1184	14	79	0	0	A_64_P092143	NM_001129879	5581.38	275	1.414134e+003	1.414697e+002	1205	39	7.879741e+000	0	0	0	0	0	0	1129.12	1	1	48.5334	39.0968
DATA	1185	14	80	0	0	A_64_P102886	A_64_P102886	5606.5	275	6.952541e+000	4.057578e+000	66	38	6.800788e+000	0	0	0	0	0	0	5.54177	1	0	54.1152	38.5926
DATA	1186	14	81	66	1	DarkCorner	DarkCorner	5632.63	275.328	4.017718e+000	4.002812e+000	55	37	7.427065e+000	0	0	0	0	0	0	-5.7468	0	0	44.7812	36.5
DATA	1187	14	82	66	1	DarkCorner	DarkCorner	5658.03	274.586	4.021358e+000	4.006439e+000	55	38	8.462493e+000	0	0	0	0	0	0	-4.95263	0	0	46.8651	38.8
DATA	1188	14	83	66	1	DarkCorner	DarkCorner	5683.52	274.818	4.022749e+000	4.007824e+000	59	38	6.809880e+000	0	0	0	0	0	0	-1.39091	0	0	46.1809	36.2273
DATA	1189	14	84	66	1	DarkCorner	DarkCorner	5708.54	275.217	4.022066e+000	4.007144e+000	55	38.5	6.981212e+000	0	0	0	0	0	0	-4.3028	0	0	46.8651	38.7083
DATA	1190	14	85	66	1	DarkCorner	DarkCorner	5733.58	275.427	4.019367e+000	4.006663e+000	59.5	35.5	8.346014e+000	0	0	0	0	0	0	1.0583	0	0	57.5363	36.2872
DATA	1191	15	1	66	1	DarkCorner	DarkCorner	3588	280.545	3.470656e+000	3.457780e+000	58.5	34	6.786879e+000	0	0	0	0	0	0	0.00155149	0	0	55.8519	34.3815
DATA	1192	15	2	66	1	DarkCorner	DarkCorner	3613.83	280.493	3.456790e+000	3.443965e+000	60	41.5	9.385018e+000	0	0	0	0	0	0	-1.51796	0	0	47.2035	40.4167
DATA	1193	15	3	66	1	DarkCorner	DarkCorner	3638.47	280.76	3.443730e+000	3.430953e+000	55	41	5.825959e+000	0	0	0	0	0	0	-4.57015	0	0	49.1849	41.6429
DATA	1194	15	4	66	1	DarkCorner	DarkCorner	3664.42	280.573	3.430305e+000	3.417579e+000	57.5	41	6.711732e+000	0	0	0	0	0	0	-2.95792	0	0	57.5363	40.7879
DATA	1195	15	5	66	1	DarkCorner	DarkCorner	3689.58	280.573	3.417569e+000	3.404889e+000	54	43	8.751897e+000	0	0	0	0	0	0	-5.90756	0	0	65	41.9355
DATA	1196	15	6	0	0	A_44_P451392	NM_001108023	3715	280.545	2.170852e+002	2.197199e+001	263.5	44	1.050911e+001	0	0	0	0	0	0	203.902	1	1	55.8519	41.2
DATA	1197	15	7	0	0	A_64_P012661	ENSRNOT00000010298	3740	280.722	7.469205e+002	7.476851e+001	758.5	38	4.958321e+000	0	0	0	0	0	0	704.035	1	1	47.8731	38.5806
DATA	1198	15	8	0	0	A_42_P546058	NM_053670	3765.38	280.756	1.284960e+003	1.285401e+002	1237	46	7.260587e+000	0	0	0	0	0	0	1215.38	1	1	50.1463	44.871
DATA	1199	15	9	0	0	A_42_P695401	NM_031530	3791.42	280.573	4.096518e+001	5.296522e+000	98	40	7.507457e+000	0	0	0	1	0	0	38.8795	1	1	57.5363	40.4762
DATA	1200	15	10	0	0	A_44_P192193	A_44_P192193	3816.5	280.648	8.139564e+001	8.800739e+000	137.5	44.5	8.364308e+000	0	0	0	0	0	0	77.4966	1	1	65	42.4643
DATA	1201	15	11	0	0	A_42_P473886	NM_001165922	3841.52	280.638	1.655834e+002	1.689118e+001	215	42.5	8.415097e+000	0	0	0	0	0	0	158.129	1	1	47.5395	42.6364
DATA	1202	15	12	0	0	A_42_P576953	NM_138882	3866.87	280.529	3.922793e+002	3.936876e+001	441.5	42	7.207950e+000	0	0	0	0	0	0	375.71	1	1	47.8731	40.7273
DATA	1203	15	13	0	0	A_44_P260227	ENSRNOT00000036745	3892.58	280.573	3.179752e+001	4.595395e+000	94	45	6.855341e+000	0	0	0	0	0	0	30.5396	1	1	57.5363	45.0645
DATA	1204	15	14	0	0	A_44_P276435	NM_053853	3918.09	280.935	9.076135e+001	9.660532e+000	149	42	7.801401e+000	0	0	0	0	0	0	87.398	1	1	54.4085	39.8378
DATA	1205	15	15	0	0	A_43_P19066	NM_001017494	3943.21	280.8	8.957350e+001	9.546292e+000	149	42.5	9.423489e+000	0	0	0	0	0	0	86.46	1	1	46.8651	40.4706
DATA	1206	15	16	0	0	A_64_P113200	ENSRNOT00000061930	3968.91	280.935	2.065370e+001	3.887709e+000	81	45	1.002155e+001	0	0	0	0	0	0	19.9808	1	1	54.4085	44.4118
DATA	1207	15	17	0	0	A_42_P480108	NM_001007637	3994	280.569	5.124550e+002	5.135082e+001	556	43	9.161844e+000	0	0	0	0	0	0	496.757	1	1	44.7812	42.7576
DATA	1209	15	19	0	0	A_44_P420046	NM_021669	4044.97	281.377	4.708922e+001	5.736159e+000	114	40.5	7.385367e+000	0	0	0	0	0	0	45.8069	1	1	44.0646	38.6071
DATA	1210	15	20	0	0	A_64_P077021	A_64_P077021	4070.5	281	2.936865e+001	4.395910e+000	91.5	40.5	7.481725e+000	0	0	0	0	0	0	28.6099	1	1	54.1152	39.9773
DATA	1211	15	21	0	0	A_44_P292558	NM_213559	4095.61	281.069	1.924314e+002	1.951850e+001	254	46	6.351640e+000	0	0	0	0	0	0	187.686	1	1	65	44.52
DATA	1212	15	22	0	0	A_42_P471653	NM_001031654	4121.5	281	2.546399e+001	4.139504e+000	89	47	1.011462e+001	0	0	0	0	0	0	24.8614	1	1	54.1152	47.2188
DATA	1213	15	23	0	0	A_43_P12000	NM_019272	4146.5	281	4.767067e+002	4.778209e+001	535	46	1.232394e+001	0	0	0	0	0	0	465.782	1	1	54.1152	45.7097
DATA	1214	15	24	0	0	A_64_P131395	NM_001037523	4172	281	2.246196e+001	3.958350e+000	84	56	2.210969e+001	0	0	0	0	1	0	21.9595	1	1	54.9904	58.9615
DATA	1215	15	25	0	0	A_42_P682853	NM_017193	4197.5	281	4.418629e+002	4.430625e+001	501.5	52	1.826197e+001	0	0	0	1	1	0	432.121	1	1	54.1152	55.9787
DATA	1216	15	26	0	0	A_42_P647505	TC640289	4222.54	280.62	1.463516e+003	1.463879e+002	1504.5	54	1.413487e+001	0	0	0	0	0	0	1431.38	1	1	47.5395	51.3913
DATA	1217	15	27	0	0	A_44_P682959	NM_001025139	4248.42	281.427	9.789149e+000	3.402215e+000	73.5	54	8.680054e+000	0	0	0	0	0	0	9.57302	1	0	57.5363	53.48
DATA	1218	15	28	0	0	A_64_P249426	NM_001014271	4273.5	281.352	1.966279e+001	3.806669e+000	79.5	50.5	1.211868e+001	0	0	0	0	0	0	19.2217	1	1	57.5363	51.4167
DATA	1219	15	29	0	0	A_64_P133430	NM_001044282	4299	281.455	1.179192e+004	1.179196e+003	11410	49.5	1.273277e+001	0	0	0	0	0	0	11520.5	1	1	55.8519	51.8636
DATA	1220	15	30	0	0	A_42_P635611	NM_001025685	4324.42	281.427	1.396063e+001	3.550205e+000	76	41	1.570136e+001	0	0	0	1	0	0	13.6279	1	0	57.5363	46.9259
DATA	1221	15	31	0	0	A_42_P592013	NM_001127600	4349.44	281.028	9.748441e+002	9.753916e+001	989	44	1.166661e+001	0	0	0	0	0	0	950.609	1	1	48.2044	47.0357
DATA	1222	15	32	0	1	ETG02_36680	ETG02_36680	4375.42	281.427	9.442990e+000	3.405503e+000	70	46	1.333452e+001	0	0	0	0	0	0	9.19605	1	0	57.5363	47.5714
DATA	1223	15	33	0	0	A_42_P608478	NM_001025131	4400.58	281.427	1.187841e+001	3.485582e+000	74	46	1.172289e+001	0	0	0	0	0	0	11.5502	1	0	65	46.6364
DATA	1224	15	34	0	0	A_44_P137397	NM_017236	4426	281.455	5.035277e+004	5.035278e+003	48256	44	1.155185e+001	0	0	0	0	0	0	48875.4	1	1	55.8519	44.3871
DATA	1226	15	36	0	0	A_64_P110789	A_64_P110789	4476.58	281.427	1.270051e+001	3.532692e+000	76	40	1.023277e+001	0	0	0	0	0	0	12.2763	1	0	57.5363	42.5
DATA	1227	15	37	0	0	A_64_P061562	A_64_P061562	4501.95	281.375	1.228418e+003	1.228863e+002	1170	38	6.271335e+000	0	0	0	0	0	0	1184.5	1	1	50.1463	37.6563
DATA	1228	15	38	0	0	A_44_P511359	NM_001108736	4527.35	281.577	2.443582e+002	2.465942e+001	297.5	38	7.162217e+000	0	0	0	0	0	0	234.999	1	1	47.8731	37.7879
DATA	1229	15	39	0	0	A_42_P658220	NM_001109598	4552.94	281.494	1.031212e+003	1.031747e+002	1097.5	40	9.811415e+000	0	0	0	0	0	0	988.849	1	1	50.4627	39.8286
DATA	1230	15	40	0	0	A_42_P479096	NM_001008293	4578.06	281.611	4.781019e+002	4.792622e+001	510.5	45	9.877468e+000	0	0	0	0	0	0	457.068	1	1	48.2044	43.7667
DATA	1231	15	41	0	0	A_64_P275280	NM_001109569	4603.92	280.789	3.067155e+003	3.067338e+002	2930.5	42	1.042973e+001	0	0	0	0	0	0	2922.35	1	1	46.8651	42.2727
DATA	1232	15	42	0	0	A_42_P785926	NM_001108289	4628.78	281.119	5.914390e+002	5.923902e+001	627	40	7.032343e+000	0	0	0	0	0	0	561.602	1	1	45.835	39.5769
DATA	1233	15	43	0	0	A_64_P005238	A_64_P005238	4654.5	281.5	3.268291e+001	4.693223e+000	93	40	8.603648e+000	0	0	0	0	0	0	30.9191	1	1	57.5363	38.6316
DATA	1234	15	44	0	0	A_42_P555753	NM_001106401	4679.68	281.453	1.979660e+003	1.979949e+002	1898	40	8.084636e+000	0	0	0	0	0	0	1865.65	1	1	49.1849	41.1429
DATA	1235	15	45	0	0	A_42_P469751	XM_001054007	4705.42	281.573	1.030502e+003	1.031061e+002	1050	42	8.281854e+000	0	0	0	0	0	0	967.188	1	1	57.5363	42.975
DATA	1236	15	46	0	0	A_44_P506124	XM_222590	4730.41	281.746	1.604094e+003	1.604457e+002	1594	46	9.536633e+000	0	0	0	0	0	0	1499.31	1	1	47.5395	46
DATA	1237	15	47	0	0	A_44_P441947	XM_001079870	4756.11	281.5	8.111793e+002	8.119017e+001	825	44	1.013101e+001	0	0	0	0	0	0	754.834	1	1	56.9804	45.6389
DATA	1238	15	48	0	0	A_64_P127659	NM_001106228	4781.29	281.699	1.790166e+003	1.790497e+002	1726.5	44	8.349265e+000	0	0	0	0	0	0	1658.36	1	1	48.2044	43.9091
DATA	1239	15	49	0	0	A_42_P733076	NM_001033867	4806.67	281.5	1.929341e+002	1.960046e+001	244	42	9.209330e+000	0	0	0	0	0	0	177.893	1	1	57.5363	42.8
DATA	1240	15	50	0	0	A_64_P145939	NM_001109499	4832.36	281.582	4.601783e+001	5.765060e+000	107	39	7.834326e+000	0	0	0	0	0	0	42.2242	1	1	45.835	40.28
DATA	1241	15	51	0	0	A_44_P1040796	NM_001106660	4857.32	281.382	7.479025e+003	7.479107e+002	6766	41	6.718516e+000	0	0	0	0	0	0	6829.15	1	1	46.5243	40.4615
DATA	1242	15	52	0	0	A_42_P588072	NM_001106829	4883	281.545	4.646821e+001	5.821979e+000	105.5	40	1.455057e+001	0	0	0	0	0	0	42.2143	1	1	55.8519	43.9459
DATA	1243	15	53	0	0	A_64_P045823	ENSRNOT00000023172	4908.42	281.573	1.164321e+002	1.216530e+001	169.5	42	1.616746e+001	0	0	0	0	0	0	105.228	1	1	57.5363	46.3793
DATA	1244	15	54	0	0	A_42_P591344	NM_001037780	4933.58	281.573	1.078789e+002	1.135513e+001	160	39.5	7.434725e+000	0	0	0	0	0	0	96.992	1	1	57.5363	39.6429
DATA	1245	15	55	0	0	A_64_P120322	A_64_P120322	4959.38	281.59	3.576591e+000	3.571052e+000	65.5	41	6.290191e+000	0	0	0	0	0	0	2.10006	0	0	50.1463	41.931
DATA	1246	15	56	0	0	A_64_P062665	NM_001170470	4984.62	281.844	2.562000e+002	2.586926e+001	296	38.5	6.935749e+000	0	0	0	0	0	0	227.876	1	1	49.8279	39.2308
DATA	1247	15	57	0	0	A_44_P398300	NM_001005538	5009.87	281.471	1.022317e+003	1.022951e+002	956	39	1.070461e+001	0	0	0	0	0	0	904.357	1	1	47.8731	40.7273
DATA	1248	15	58	0	0	A_64_P001545	ENSRNOT00000029141	5035.16	281.882	1.970949e+004	1.970952e+003	17460	43.5	9.338833e+000	0	0	0	0	0	0	17340.5	1	1	46.5243	42.4
DATA	1249	15	59	0	0	A_44_P1010653	NM_001109021	5060.57	281.662	2.070222e+003	2.070542e+002	1788	44	1.015122e+001	0	0	0	0	0	0	1811.33	1	1	47.8731	44.7879
DATA	1250	15	60	0	0	A_44_P398969	NM_001013225	5085.94	281.765	3.359583e+002	3.379483e+001	354	44.5	9.325167e+000	0	0	0	0	0	0	292.325	1	1	46.1809	44.5263
DATA	1251	15	61	0	0	A_64_P059495	NM_001109986	5111.38	282	2.933504e+003	2.933735e+002	2484	41	6.087566e+000	0	0	0	0	0	0	2538.44	1	1	48.5334	41.4615
DATA	1252	15	62	0	0	A_64_P037040	A_64_P037040	5136.97	282.014	1.774676e+002	1.812894e+001	213	44	9.318997e+000	0	0	0	0	0	0	152.716	1	1	46.8651	41.5429
DATA	1253	15	63	0	0	A_64_P051446	NM_001142942	5162.5	282	4.057910e+003	4.058081e+002	3376.5	41.5	1.139433e+001	0	0	0	0	0	0	3472.77	1	1	54.1152	42.8571
DATA	1254	15	64	0	0	A_42_P701756	NM_001107646	5187.69	282	1.111068e+003	1.111698e+002	986	45	1.048046e+001	0	0	0	0	0	0	945.748	1	1	50.4627	45.56
DATA	1255	15	65	0	0	A_44_P172604	NM_031795	5213.22	281.736	1.838553e+003	1.838938e+002	1576	39.5	1.007586e+001	0	0	0	0	0	0	1556.55	1	1	47.2035	43.8333
DATA	1256	15	66	0	0	A_64_P152000	A_64_P152000	5238.5	282	6.778573e+000	3.843666e+000	70	42	7.911767e+000	0	0	0	0	0	0	5.70892	1	0	65	40.8966
DATA	1257	15	67	0	0	A_44_P339008	NM_001024975	5263.72	281.957	2.963283e+002	2.987586e+001	314	42	7.180619e+000	0	0	0	0	0	0	248.289	1	1	46.1809	41.1935
DATA	1258	15	68	0	0	A_44_P560070	A_44_P560070	5289.86	282.203	3.836864e+000	3.830539e+000	64.5	42	9.106171e+000	0	0	0	0	0	0	2.0509	0	0	46.1809	41.7879
DATA	1259	15	69	0	0	A_44_P520509	NM_001033868	5314.44	281.973	3.927550e+003	3.927738e+002	3179	40	5.387809e+000	0	0	0	0	0	0	3258.31	1	1	48.5334	40.4815
DATA	1260	15	70	0	0	A_42_P643349	NM_001109495	5340.09	282.065	3.592327e+001	5.272472e+000	91	40	5.961653e+000	0	0	0	0	0	0	29.6598	1	1	54.4085	41.8148
DATA	1261	15	71	0	0	A_44_P215075	NM_012667	5365.44	282.091	6.178665e+001	7.294254e+000	112	44	8.999944e+000	0	0	0	0	0	0	50.7823	1	1	45.4864	44.9688
DATA	1262	15	72	0	0	A_44_P560363	ENSRNOT00000049736	5390.94	282.232	1.377792e+003	1.378342e+002	1192.5	44	9.355063e+000	0	0	0	0	0	0	1127.47	1	1	46.5243	45.0357
DATA	1263	15	73	0	0	A_44_P553158	NM_001014014	5416.33	281.671	8.708425e+002	8.717199e+001	758.5	42	1.045987e+001	0	0	0	0	0	0	709.659	1	1	47.5395	41.8621
DATA	1264	15	74	0	0	A_64_P165277	NM_001106370	5441.58	282.427	3.939640e+000	3.940961e+000	64	43	7.575807e+000	0	0	0	0	0	0	2.87439	0	0	57.5363	44.0833
DATA	1265	15	75	0	0	A_64_P138187	A_64_P138187	5467.29	282.171	9.129482e+002	9.137978e+001	803	44.5	7.177231e+000	0	0	0	0	0	0	738.423	1	1	50.7771	44.7333
DATA	1266	15	76	0	0	A_44_P429041	XM_227654	5492.62	281.864	2.474504e+002	2.505875e+001	260	46	1.112567e+001	0	0	0	0	0	0	199.478	1	1	45.4864	46.3704
DATA	1267	15	77	0	0	A_44_P465880	NM_199389	5517.88	282.027	1.463030e+003	1.463567e+002	1243.5	46	1.023711e+001	0	0	0	0	0	0	1175.89	1	1	46.8651	45.7143
DATA	1268	15	78	0	0	A_44_P381740	NM_001000239	5543.64	281.864	1.507100e+001	4.251413e+000	70	39	8.723486e+000	0	0	0	0	0	0	12.0801	1	0	42.9674	39.8929
DATA	1269	15	79	0	0	A_64_P045211	NM_001191733	5568.58	282.427	1.296180e+001	4.189707e+000	73	41	8.662671e+000	0	0	0	0	0	0	10.3664	1	0	57.5363	41.4483
DATA	1270	15	80	0	0	A_64_P010896	A_64_P010896	5594	282.455	1.490401e+001	4.261007e+000	75	38	8.783634e+000	0	0	0	0	0	0	11.8968	1	0	55.8519	40.4063
DATA	1271	15	81	0	0	A_42_P566906	NM_001006966	5619.43	281.71	1.324057e+003	1.324661e+002	1127	37	8.507127e+000	0	0	0	1	0	0	1055.23	1	1	46.8651	37.9394
DATA	1272	15	82	66	1	DarkCorner	DarkCorner	5645.31	282.77	4.017096e+000	4.002192e+000	57	37	7.934792e+000	0	0	0	0	0	0	-2.9658	0	0	51.7088	38.2667
DATA	1273	15	83	66	1	DarkCorner	DarkCorner	5670.22	282.216	4.019697e+000	4.004784e+000	57	39	7.818093e+000	0	0	0	0	0	0	-3.04726	0	0	48.8603	39.4516
DATA	1274	15	84	66	1	DarkCorner	DarkCorner	5695.58	282.427	4.020131e+000	4.005316e+000	60	41	6.722692e+000	0	0	0	0	0	0	0.225405	0	0	57.5363	39.8621
DATA	1275	15	85	66	1	DarkCorner	DarkCorner	5721.09	282.544	4.018508e+000	4.003599e+000	58	39	7.951133e+000	0	0	0	0	0	0	-0.560325	0	0	50.4627	38.6
DATA	1276	16	1	66	1	DarkCorner	DarkCorner	3600.5	288	3.462776e+000	3.452862e+000	61	37	9.389210e+000	0	0	0	0	0	0	1.31423	0	0	54.1152	37.1277
DATA	1277	16	2	66	1	DarkCorner	DarkCorner	3625.89	288.305	3.449283e+000	3.436486e+000	58	45	6.562507e+000	0	0	0	0	0	0	-2.05874	0	0	49.5074	46.069
DATA	1278	16	3	66	1	DarkCorner	DarkCorner	3651.87	287.487	3.435879e+000	3.423132e+000	57.5	41	5.937927e+000	0	0	0	0	0	0	-3.93091	0	0	48.5334	40.85
DATA	1279	16	4	66	1	DarkCorner	DarkCorner	3677.03	287.791	3.423024e+000	3.410324e+000	56	44	9.273618e+000	0	0	0	0	0	0	-4.6799	0	0	46.1809	42
DATA	1280	16	5	0	0	A_42_P708614	NM_001130505	3702.5	288	2.092871e+004	2.092874e+003	19769	45	9.039230e+000	0	0	0	0	0	0	19627.2	1	1	54.1152	44.6786
DATA	1281	16	6	0	0	A_44_P427177	NM_053923	3727.61	287.516	3.398277e+000	3.393970e+000	64	37	7.304935e+000	0	0	0	0	0	0	2.23258	0	0	44.4243	38.5
DATA	1282	16	7	0	0	A_44_P417051	NM_001024886	3753.09	288.065	4.165109e+001	5.360069e+000	100.5	40.5	8.912151e+000	0	0	0	0	0	0	39.3381	1	1	54.4085	40.4333
DATA	1283	16	8	0	0	A_64_P052917	ENSRNOT00000029053	3778.5	288.352	2.743118e+001	4.339349e+000	84.5	41.5	7.942332e+000	0	0	0	0	0	0	25.9959	1	1	65	41.875
DATA	1284	16	9	0	0	A_42_P689013	NM_053800	3803.39	287.871	7.557250e+003	7.557324e+002	7045	44	8.346656e+000	0	0	0	0	0	0	7184.66	1	1	47.2035	43
DATA	1285	16	10	0	0	A_42_P668072	NM_013130	3828.88	287.971	2.007900e+002	2.035509e+001	253	45	8.353835e+000	0	0	0	0	0	0	191.491	1	1	46.8651	43.1739
DATA	1286	16	11	0	0	A_44_P762596	XM_237156	3854.17	288	1.387575e+002	1.427003e+001	191	41	7.723194e+000	0	0	0	0	0	0	132.725	1	1	46.8651	41.0909
DATA	1287	16	12	0	0	A_44_P673662	TC577636	3879.91	287.9	8.203172e+001	8.850187e+000	143	43	6.940335e+000	0	0	0	0	0	0	78.6902	1	1	46.8651	43.9444
DATA	1288	16	13	0	0	A_42_P674598	NM_013067	3904.91	288.28	2.039105e+004	2.039108e+003	19012	44	9.610072e+000	0	0	0	0	0	0	19611.9	1	1	48.8603	45.3947
DATA	1289	16	14	0	0	A_44_P529994	NM_001191720	3930.58	288.427	2.234654e+001	3.989281e+000	82.5	43	3.645611e+000	0	0	0	0	0	0	21.547	1	1	57.5363	43.2381
DATA	1290	16	15	0	0	A_42_P655644	NM_133618	3955.41	288.639	8.663465e+002	8.669737e+001	896	41.5	6.775208e+000	0	0	0	0	0	0	837.244	1	1	51.7088	40.6
DATA	1291	16	16	0	0	A_42_P589674	NM_001044225	3981	288.191	2.118960e+003	2.119215e+002	2109	43	1.006688e+001	0	0	0	0	0	0	2052.17	1	1	46.8651	45.0278
DATA	1292	16	17	0	0	A_64_P010139	A_64_P010139	4007	288.455	2.003021e+002	2.029757e+001	258	38	9.961944e+000	0	0	0	0	0	0	194.374	1	1	55.8519	39.6286
DATA	1293	16	18	0	0	A_42_P586883	NM_001106416	4032.42	288.427	3.172151e+001	4.561478e+000	94	41	8.664530e+000	0	0	0	0	0	0	30.8362	1	1	57.5363	41.5
DATA	1294	16	19	0	0	A_42_P461144	DV724416	4057.15	287.723	7.071857e+002	7.079427e+001	746.5	41	6.244744e+000	0	0	0	0	0	0	688.47	1	1	45.835	40.5556
DATA	1295	16	20	0	0	A_64_P130565	NM_031668	4083.33	288.5	8.494529e+001	9.101664e+000	143.5	42	8.385806e+000	0	0	0	0	0	0	82.811	1	1	57.5363	40.7353
DATA	1296	16	21	0	0	A_64_P002826	NM_001134527	4108.17	288.434	1.003202e+002	1.054995e+001	160	47	7.338586e+000	0	0	0	0	0	0	97.9056	1	1	49.8279	44.625
DATA	1298	16	23	0	0	A_64_P036099	A_64_P036099	4159.47	288.368	1.626337e+003	1.626664e+002	1620	48	1.552867e+001	0	0	0	0	0	0	1589.7	1	1	49.8279	50.7037
DATA	1299	16	24	0	0	A_64_P080580	ENSRNOT00000040473	4184.67	288.5	4.843676e+002	4.854624e+001	494	55	1.720529e+001	0	0	0	0	1	0	473.664	1	1	65	56.5143
DATA	1300	16	25	0	0	A_43_P12276	NM_022636	4210.33	288.5	1.319896e+002	1.509826e+001	143.5	60	2.742820e+001	0	0	0	0	1	0	129.101	1	1	65	64.4
DATA	1301	16	26	0	0	A_42_P505393	NM_199085	4235.17	288.25	3.768194e+002	3.782250e+001	432	58.5	3.063631e+001	0	0	0	0	1	0	368.567	1	1	49.5074	67.8947
DATA	1302	16	27	0	0	A_44_P883619	ENSRNOT00000032374	4260.89	288.5	9.245971e+000	3.387174e+000	70	53	1.124997e+001	0	0	0	0	0	0	9.04129	1	0	56.9804	52.5238
DATA	1303	16	28	0	0	A_44_P493894	ENSRNOT00000050156	4286.42	288.573	1.718274e+005	1.718274e+004	167873	47	7.810250e+000	0	0	0	0	0	0	167943	1	1	57.5363	48
DATA	1304	16	29	0	0	A_64_P085334	TC585414	4311.38	288.447	3.875232e+003	3.875369e+002	3685	44	9.883911e+000	0	0	0	0	0	0	3784.98	1	1	49.8279	46.3478
DATA	1306	16	31	0	0	A_64_P045433	A_64_P045433	4362.06	288.696	2.455170e+003	2.455388e+002	2435	43	8.179784e+000	0	0	0	0	0	0	2392.95	1	1	46.1809	44.1379
DATA	1307	16	32	0	0	A_64_P025351	AY724474	4387.5	288.711	1.622000e+004	1.622003e+003	15457.5	42	9.592703e+000	0	0	0	0	0	0	15786.7	1	1	49.1849	42.4074
DATA	1308	16	33	0	0	A_44_P501626	ENSRNOT00000050744	4413.42	288.573	1.497732e+001	3.605175e+000	79.5	42	1.186033e+001	0	0	0	0	0	0	14.5528	1	0	65	43.1034
DATA	1309	16	34	0	0	A_64_P071525	NM_001000141	4438.58	288.573	3.297653e+000	3.286979e+000	64	38.5	9.270300e+000	0	0	0	0	0	0	0.982122	0	0	57.5363	39.4615
DATA	1310	16	35	0	0	A_64_P006545	A_64_P006545	4464.06	288.527	6.120888e+003	6.120976e+002	5974	43	1.103962e+001	0	0	0	0	0	0	5923.95	1	1	53.8203	42.8387
DATA	1311	16	36	0	0	A_64_P089561	NM_001044265	4489.4	288.587	4.280391e+001	5.404760e+000	103	38	7.441438e+000	0	0	0	0	0	0	41.331	1	1	49.5074	38
DATA	1312	16	37	0	0	A_44_P791108	NM_001014070	4514.76	288.704	2.701821e+001	4.271393e+000	89	37.5	6.620475e+000	0	0	0	0	0	0	26.0226	1	1	47.2035	37.1429
DATA	1313	16	38	0	0	A_44_P161535	A_44_P161535	4540.08	289.222	2.745386e+003	2.745586e+002	2745	38.5	8.673441e+000	0	0	0	0	0	0	2637	1	1	45.4864	39.8333
DATA	1314	16	39	0	0	A_44_P299136	NM_001108539	4565.74	288.776	2.014614e+002	2.041907e+001	256	40	9.166970e+000	0	0	0	0	0	0	192.927	1	1	49.1849	40.0333
DATA	1315	16	40	1028	1	(+)E1A_r60_a97	E1A_r60_a97	4591.09	288.614	3.350370e+000	3.346036e+000	66	40	9.931393e+000	0	0	0	0	0	0	2.22057	0	0	65	40.5152
DATA	1316	16	41	0	0	A_44_P161723	NM_001134526	4616.5	288.648	1.099082e+002	1.148980e+001	167	41	7.602787e+000	0	0	0	0	0	0	104.565	1	1	57.5363	40.4348
DATA	1317	16	42	0	0	A_64_P121443	A_64_P121443	4641.97	288.825	3.373754e+000	3.369212e+000	66	41.5	7.568370e+000	0	0	0	0	0	0	2.19623	0	0	45.4864	39.2632
DATA	1318	16	43	0	0	A_42_P771373	NM_012614	4667	288.797	4.438405e+003	4.438534e+002	4165	40	8.049500e+000	0	0	0	0	0	0	4191.97	1	1	46.8651	40.4474
DATA	1319	16	44	0	0	A_44_P1025944	NM_147140	4692.15	288.785	5.359519e+003	5.359626e+002	5094	40.5	8.467820e+000	0	0	0	0	0	0	5042.21	1	1	45.835	41.8056
DATA	1320	16	45	0	0	A_64_P014085	NM_001007678	4717.81	288.92	5.184289e+002	5.195433e+001	541	44.5	8.657997e+000	0	0	0	0	0	0	485.713	1	1	47.8731	45.0667
DATA	1321	16	46	0	0	A_64_P095298	NM_001047963	4743.18	288.774	3.950715e+001	5.222517e+000	101	42	9.612374e+000	0	0	0	0	0	0	36.8557	1	1	45.1352	43.0909
DATA	1322	16	47	0	0	A_64_P122037	A_64_P122037	4768.81	288.974	1.028917e+004	1.028922e+003	9474	43	1.108016e+001	0	0	0	0	0	0	9555.75	1	1	49.1849	44.3548
DATA	1323	16	48	0	0	A_64_P098094	A_64_P098094	4794.5	289	4.209400e+004	4.209401e+003	38726.5	46	9.024831e+000	0	0	0	0	0	0	38912.2	1	1	54.1152	44.6875
DATA	1324	16	49	0	0	A_44_P353708	ENSRNOT00000033510	4819.61	288.864	5.413217e+001	6.426225e+000	115	37	1.111926e+001	0	0	0	0	0	0	49.8063	1	1	45.4864	42.069
DATA	1325	16	50	0	0	A_42_P541669	ENSRNOT00000043345	4844.72	288.905	4.973956e+002	4.986114e+001	516	37.5	6.566825e+000	0	0	0	0	0	0	455.45	1	1	48.8603	39.0833
DATA	1326	16	51	0	0	A_42_P560894	NM_019138	4870.17	289	2.641827e+003	2.642059e+002	2413	39	7.261876e+000	0	0	0	0	0	0	2406.99	1	1	46.8651	39.2121
DATA	1327	16	52	0	0	A_42_P498066	NM_031136	4895.5	289	5.121597e+004	5.121598e+003	45437	37	6.198118e+000	0	0	0	0	0	0	46426.7	1	1	54.1152	37.8
DATA	1328	16	53	0	0	A_42_P538928	NM_053021	4921.09	289.104	8.259660e+003	8.259735e+002	7496	37	5.912332e+000	0	0	0	1	0	0	7448.23	1	1	46.8651	37.2069
DATA	1329	16	54	0	0	A_64_P302169	NM_001099493	4946.71	288.952	3.066144e+001	4.692672e+000	91	37.5	6.556517e+000	0	0	0	0	0	0	27.502	1	1	45.1352	38.6579
DATA	1330	16	55	0	0	A_43_P18282	NM_001173436	4972.07	289.405	6.337794e+001	7.274796e+000	120	41	6.284789e+000	0	0	0	0	0	0	56.5455	1	1	48.8603	40.963
DATA	1331	16	56	0	0	A_44_P304169	NM_001000482	4997.4	289.147	1.457966e+002	1.501534e+001	193	39	8.873405e+000	0	0	0	0	0	0	129.376	1	1	48.8603	39.2917
DATA	1332	16	57	0	0	A_44_P318932	XM_231081	5022.45	288.677	2.451086e+003	2.451352e+002	2266	40	8.065689e+000	0	0	0	0	0	0	2163.28	1	1	45.1352	41.3478
DATA	1333	16	58	0	0	A_64_P124621	A_64_P124621	5048.09	289.386	1.146842e+002	1.202928e+001	163.5	44	9.531447e+000	0	0	0	0	0	0	100.662	1	1	57.259	43
DATA	1334	16	59	0	0	A_42_P553960	NM_001107831	5073.21	289.125	3.747103e+003	3.747280e+002	3317	40.5	9.926365e+000	0	0	0	0	0	0	3270.98	1	1	47.5395	40.8158
DATA	1335	16	60	0	0	A_64_P129459	A_64_P129459	5099.03	289.063	4.803164e+002	4.817171e+001	487.5	43	7.677142e+000	0	0	0	0	0	0	416.935	1	1	45.835	42.0294
DATA	1336	16	61	0	0	A_64_P083224	ENSRNOT00000017383	5124.09	289.062	1.805036e+001	4.108567e+000	77	44.5	7.613589e+000	0	0	0	0	0	0	15.5834	1	0	46.1809	43.9688
DATA	1337	16	62	0	0	A_64_P031840	NM_001017445	5149.49	289.367	7.144157e+002	7.153789e+001	684	42	1.128635e+001	0	0	0	0	0	0	613.414	1	1	49.8279	40.1034
DATA	1338	16	63	0	0	A_43_P16427	NM_001191000	5175	289.455	4.405327e+001	5.773226e+000	100	41.5	1.482325e+001	0	0	0	0	0	0	37.6191	1	1	55.8519	46.6071
DATA	1339	16	64	0	0	A_64_P159034	NM_001191681	5200.22	289.261	1.164586e+004	1.164592e+003	9874.5	48	9.101102e+000	0	0	0	0	0	0	9891.77	1	1	46.8651	47.5172
DATA	1340	16	65	0	0	A_64_P009007	A_64_P009007	5225.67	289.5	3.999141e+001	5.496950e+000	98	40.5	9.710581e+000	0	0	0	0	0	0	33.7883	1	1	65	43.8462
DATA	1341	16	66	0	0	A_42_P489817	NM_001107681	5251.42	289.427	1.784423e+003	1.784826e+002	1546	42	8.316650e+000	0	0	0	0	0	0	1499.69	1	1	57.5363	40.8
DATA	1342	16	67	0	0	A_42_P643272	NM_053389	5276.5	289.5	1.222609e+003	1.223203e+002	1104	44	9.758333e+000	0	0	0	0	0	0	1022.36	1	1	57.5363	44.0741
DATA	1343	16	68	0	0	A_64_P076063	XM_001061753	5302.11	289.5	6.486089e+001	7.532293e+000	115	41	6.653158e+000	0	0	0	0	0	0	53.9668	1	1	56.9804	40.7419
DATA	1344	16	69	0	0	A_64_P047371	NM_001109423	5327.32	289.353	1.408536e+003	1.409062e+002	1241	40	3.562977e+000	0	0	0	0	0	0	1166.35	1	1	46.1809	40.1364
DATA	1345	16	70	0	0	A_44_P991940	XM_225667	5352.67	289.5	6.643253e+001	7.686199e+000	118	39	6.618097e+000	0	0	0	0	0	0	54.7565	1	1	57.5363	39.5278
DATA	1346	16	71	0	0	A_42_P667802	ENSRNOT00000014585	5377.97	289.438	1.032040e+002	1.102674e+001	142.5	44.5	9.098032e+000	0	0	0	0	0	0	84.6882	1	1	48.5334	44.5
DATA	1347	16	72	0	0	A_44_P433942	A_44_P433942	5403.49	289.333	2.581445e+001	4.676678e+000	82	41	9.562215e+000	0	0	0	0	0	0	21.0928	1	1	49.1849	40.6897
DATA	1348	16	73	0	0	A_42_P735279	NM_001004446	5429.01	289.213	1.128673e+004	1.128680e+003	9109	41	1.451651e+001	0	0	0	0	0	0	9185.2	1	1	48.5334	45.3333
DATA	1349	16	74	0	0	A_64_P000316	A_64_P000316	5454.21	289.761	7.016254e+001	8.041859e+000	119	41.5	6.771047e+000	0	0	0	0	0	0	56.8893	1	1	46.1809	39.8684
DATA	1350	16	75	0	0	A_64_P073357	XM_001070426	5479.94	289.391	7.052227e+001	8.080066e+000	116	46	8.837566e+000	0	0	0	0	0	0	56.9786	1	1	44.7812	46.5556
DATA	1351	16	76	0	0	A_42_P501972	NM_001025418	5505.01	289.173	2.606576e+002	2.636429e+001	266	48	1.116262e+001	0	0	0	1	0	0	209.937	1	1	47.8731	47.3333
DATA	1352	16	77	0	0	A_64_P030824	ENSRNOT00000002002	5530.5	289.514	6.565565e+001	7.671183e+000	114.5	46	8.849221e+000	0	0	0	0	0	0	52.7308	1	1	49.1849	43.3939
DATA	1353	16	78	0	0	A_42_P537715	NM_001025743	5555.81	289.481	1.170281e+003	1.170957e+002	977	40.5	8.691983e+000	0	0	0	0	0	0	937.566	1	1	49.8279	42.0333
DATA	1354	16	79	0	0	A_44_P596424	TC642059	5581.31	289.662	1.460253e+002	1.513671e+001	179	42	8.687527e+000	0	0	0	0	0	0	116.74	1	1	48.5334	42.1613
DATA	1355	16	80	0	0	A_42_P528891	XM_001074805	5606.64	289.714	1.443412e+002	1.497613e+001	177	37	7.478629e+000	0	0	0	0	0	0	115.196	1	1	47.5395	37.3214
DATA	1356	16	81	0	0	A_64_P130516	A_64_P130516	5632.57	289.708	1.019343e+002	1.094938e+001	146	37	7.704145e+000	0	0	0	0	0	0	81.2445	1	1	48.5334	38.0769
DATA	1357	16	82	66	1	DarkCorner	DarkCorner	5657.48	289.972	4.015979e+000	4.001279e+000	60	38	8.691624e+000	0	0	0	0	0	0	0.317831	0	0	48.5334	39.4828
DATA	1358	16	83	66	1	DarkCorner	DarkCorner	5683.14	289.506	4.017654e+000	4.002748e+000	57.5	39	7.218283e+000	0	0	0	0	0	0	-2.53779	0	0	51.0895	38.7027
DATA	1359	16	84	66	1	DarkCorner	DarkCorner	5708.56	289.929	4.016966e+000	4.002063e+000	56	38	6.984290e+000	0	0	0	0	0	0	-3.26954	0	0	55.2791	39.0303
DATA	1360	16	85	66	1	DarkCorner	DarkCorner	5733.82	289.861	6.495203e+000	4.051847e+000	66	36	8.119843e+000	0	0	0	0	0	0	5.1748	1	0	47.5395	36.2219
DATA	1361	17	1	66	1	DarkCorner	DarkCorner	3587.78	295.095	3.468413e+000	3.458878e+000	63	34	7.612819e+000	0	0	0	0	0	0	1.39988	0	0	47.8731	34.7435
DATA	1362	17	2	66	1	DarkCorner	DarkCorner	3613.42	295.427	3.454771e+000	3.443957e+000	61	41	7.981660e+000	0	0	0	0	0	0	1.08714	0	0	57.5363	39.2759
DATA	1363	17	3	66	1	DarkCorner	DarkCorner	3638.25	294.839	3.441899e+000	3.429129e+000	57.5	41	9.942027e+000	0	0	0	0	0	0	-5.46556	0	0	53.2255	41.6098
DATA	1364	17	4	66	1	DarkCorner	DarkCorner	3664.42	295.427	3.428417e+000	3.415697e+000	59	41.5	5.763692e+000	0	0	0	0	0	0	-2.84473	0	0	57.5363	41.8529
DATA	1365	17	5	0	0	A_44_P434817	NM_001012187	3689.34	295.184	1.553819e+003	1.554191e+002	1483	40	8.268878e+000	0	0	0	0	0	0	1454.79	1	1	49.5074	38.6786
DATA	1366	17	6	0	0	A_64_P153319	A_64_P153319	3715	295.455	3.894116e+002	3.908851e+001	425.5	42	9.552883e+000	0	0	0	0	0	0	365.936	1	1	55.8519	41.5152
DATA	1367	17	7	0	0	A_64_P034394	XM_218828	3740.42	295.427	1.606283e+001	3.741228e+000	78	38	7.955268e+000	0	0	0	0	0	0	15.1479	1	0	65	40.0625
DATA	1368	17	8	0	0	A_64_P001399	A_64_P001399	3765.44	295.521	7.382323e+003	7.382400e+002	6932	43	8.881621e+000	0	0	0	0	0	0	6985.4	1	1	48.2044	42.037
DATA	1369	17	9	0	0	A_42_P712191	NM_001109207	3791.48	294.791	8.847194e+001	9.462369e+000	147	44	8.152888e+000	0	0	0	0	0	0	83.9978	1	1	46.5243	42.6071
DATA	1370	17	10	0	0	A_44_P746633	NM_001109580	3816.03	295.147	5.310615e+003	5.310721e+002	4941	43	8.569335e+000	0	0	0	0	0	0	5057.62	1	1	46.8651	40.8276
DATA	1371	17	11	0	0	A_42_P772157	NM_017020	3841.38	295.233	4.779618e+002	4.791244e+001	526	41	7.239475e+000	0	0	0	0	0	0	456.577	1	1	48.5334	40.92
DATA	1372	17	12	0	0	A_44_P407543	NM_001024996	3867.42	295.427	1.226098e+002	1.270403e+001	178	42	8.166612e+000	0	0	0	0	0	0	117.472	1	1	57.5363	41.875
DATA	1374	17	14	0	0	A_64_P057225	NM_001008857	3918.11	295.5	1.872131e+002	1.901136e+001	239	43	4.180510e+000	0	0	0	0	0	0	180.32	1	1	56.9804	41.68
DATA	1375	17	15	0	0	A_42_P462015	NM_001011943	3943.5	295.5	1.990415e+002	2.017590e+001	247	45	6.482719e+000	0	0	0	0	0	0	192.173	1	1	57.5363	42.2222
DATA	1376	17	16	0	0	A_42_P596050	NM_053572	3968.7	295.259	2.307944e+002	2.331319e+001	285	44.5	9.850375e+000	0	0	0	1	0	0	223.319	1	1	51.0895	45.9333
DATA	1377	17	17	0	0	A_44_P213776	NM_052829	3994.2	295.029	1.156474e+002	1.202262e+001	174	40	9.859878e+000	0	0	0	0	0	0	112.129	1	1	46.8651	42.9524
DATA	1378	17	18	0	0	A_64_P004468	A_64_P004468	4019.57	295.228	4.646060e+003	4.646176e+002	4581	44.5	9.622090e+000	0	0	0	0	0	0	4512.98	1	1	50.4627	43.2308
DATA	1379	17	19	0	0	A_44_P290394	NM_053580	4044.75	295.356	1.253797e+003	1.254224e+002	1298	41	5.162197e+000	0	0	0	0	0	0	1219.86	1	1	48.5334	40.2
DATA	1380	17	20	0	0	A_64_P076911	XM_215948	4070.15	295.478	7.644436e+001	8.314609e+000	138	40	6.652522e+000	0	0	0	0	0	0	74.4816	1	1	46.5243	39.5263
DATA	1381	17	21	0	0	A_64_P155895	NM_001009658	4095.58	295.573	1.233828e+003	1.234260e+002	1291.5	40.5	8.577919e+000	0	0	0	0	0	0	1203.62	1	1	57.5363	39.8929
DATA	1382	17	22	0	0	A_43_P16338	ENSRNOT00000034555	4121.42	295.573	5.849392e+001	6.697983e+000	121	43	8.446288e+000	0	0	0	0	0	0	57.1197	1	1	57.5363	43.1613
DATA	1383	17	23	0	0	A_42_P716283	NM_001107983	4146.41	295.958	2.828549e+002	2.847280e+001	344	47.5	1.589509e+001	0	0	0	0	0	0	276.423	1	1	48.2044	51.3667
DATA	1384	17	24	0	0	A_43_P13355	NM_139082	4172	295.545	2.624019e+002	2.878228e+001	226	57	2.968006e+001	0	1	0	0	1	0	256.578	1	1	55.8519	66.8846
DATA	1385	17	25	0	0	A_64_P126065	NM_001005900	4196.57	295.457	6.751933e+001	7.496734e+000	127.5	65	2.796339e+001	0	0	0	0	1	0	66.0422	1	1	39.4933	69.7317
DATA	1386	17	26	0	0	A_44_P838532	NM_001107144	4222.58	295.573	3.665455e+002	3.679900e+001	432	67	4.184052e+001	0	0	0	0	1	0	358.567	1	1	65	79.625
DATA	1387	17	27	0	0	A_42_P785861	NM_001009422	4247.81	295.275	1.456833e+003	1.457198e+002	1508	54	1.327177e+001	0	0	0	0	1	0	1424.94	1	1	46.8651	53.84
DATA	1388	17	28	0	0	A_42_P641962	NM_012999	4273.5	295.648	2.135735e+003	2.135984e+002	2166	46	8.823047e+000	0	0	0	0	0	0	2088.25	1	1	57.5363	47.6154
DATA	1389	17	29	0	0	A_64_P085201	TC633318	4299	295.681	5.971254e+001	6.803574e+000	119	43	1.341656e+001	0	0	0	0	0	0	58.3503	1	1	58.0869	47.8214
DATA	1390	17	30	0	0	A_64_P015687	NM_053573	4324.07	295.8	3.249753e+003	3.249917e+002	3206	42	1.145499e+001	0	0	0	0	0	0	3173.05	1	1	46.8651	42.4063
DATA	1391	17	31	0	0	A_64_P078332	NM_012794	4349.5	296	1.240602e+001	3.494481e+000	76	41	1.095183e+001	0	0	0	0	0	0	12.1005	1	0	65	42.8438
DATA	1392	17	32	0	0	A_42_P637189	NM_031612	4374.86	295.789	3.203501e+003	3.203668e+002	3105	40	9.801226e+000	0	0	0	0	0	0	3120.6	1	1	47.2035	40.2759
DATA	1393	17	33	0	0	A_42_P602472	NM_001008290	4399.84	295.552	1.318554e+003	1.318961e+002	1333	44	1.155152e+001	0	0	0	0	0	0	1282.52	1	1	46.1809	43.3235
DATA	1394	17	34	0	0	A_64_P003749	NM_031799	4426	296	4.515001e+001	5.581701e+000	105	42	1.256157e+001	0	0	0	0	0	0	43.8377	1	1	54.9904	44.6897
DATA	1395	17	35	0	0	A_42_P785861	NM_001009422	4451.06	295.687	1.432233e+003	1.432610e+002	1425	39	9.677006e+000	0	0	0	0	0	0	1387.89	1	1	45.835	41.1111
DATA	1396	17	36	0	0	A_64_P138889	NM_001013050	4476.36	295.87	1.782415e+003	1.782719e+002	1731	42.5	9.506199e+000	0	0	0	0	0	0	1723.47	1	1	46.8651	44.3333
DATA	1397	17	37	0	0	A_44_P409820	NM_012908	4502.39	296.069	1.917364e+001	3.819653e+000	82.5	36	6.444718e+000	0	0	0	0	0	0	18.4937	1	1	53.8203	36.1429
DATA	1398	17	38	0	0	A_44_P529880	ENSRNOT00000033370	4527.5	296	3.324519e+000	3.312185e+000	64	39	6.397544e+000	0	0	0	0	0	0	-0.0837087	0	0	65	39
DATA	1399	17	39	0	0	A_64_P084851	ENSRNOT00000029593	4552.53	296.053	1.104203e+002	1.153077e+001	173	42	1.086226e+001	0	0	0	0	0	0	105.929	1	1	48.8603	41.3636
DATA	1400	17	40	0	0	A_44_P654068	NM_001114402	4577.99	295.892	2.443478e+002	2.466087e+001	299	38	1.012534e+001	0	0	0	0	0	0	233.691	1	1	46.8651	39.4516
DATA	1401	17	41	0	0	A_64_P094855	NM_001109591	4603.57	295.716	1.708509e+003	1.708836e+002	1731	37	8.848053e+000	0	0	0	0	0	0	1628.63	1	1	46.5243	39.125
DATA	1402	17	42	0	0	A_42_P516658	NM_001024888	4628.35	295.618	2.277965e+002	2.302524e+001	274	42	8.346690e+000	0	0	0	0	0	0	216.413	1	1	46.1809	40.4571
DATA	1403	17	43	0	0	A_64_P092394	ENSRNOT00000064749	4654.5	296.352	2.153452e+001	3.996385e+000	85	39	5.710206e+000	0	0	0	0	0	0	20.3821	1	1	65	40.1613
DATA	1404	17	44	0	0	A_44_P280755	NM_148890	4679.91	296.386	5.773770e+001	6.690111e+000	118	40	7.966668e+000	0	0	0	0	0	0	54.4383	1	1	65	41.697
DATA	1405	17	45	0	0	A_42_P629062	AF072835	4705.42	296.427	3.818236e+002	3.833284e+001	416	41.5	8.650413e+000	0	0	0	0	0	0	358.555	1	1	57.5363	42.5938
DATA	1406	17	46	0	0	A_64_P131141	ENSRNOT00000012638	4730.44	296.519	2.656605e+001	4.320494e+000	87	41.5	1.028577e+001	0	0	0	0	0	0	24.8444	1	1	50.4627	39.8333
DATA	1407	17	47	0	0	A_42_P756350	NM_021772	4756	296.455	5.423105e+001	6.412597e+000	111.5	40	1.075861e+001	0	0	0	0	0	0	50.4946	1	1	65	41.4054
DATA	1408	17	48	66	-1	(-)3xSLv1	NegativeControl	4781.42	296.427	3.450465e+000	3.437663e+000	58	47	9.856376e+000	0	0	0	0	0	0	-7.08591	0	0	57.5363	47.0741
DATA	1409	17	49	0	0	A_64_P124796	A_64_P124796	4806.58	296.427	9.884703e+000	3.592224e+000	72.5	38	1.117553e+001	0	0	0	0	0	0	9.12008	1	0	65	41.3226
DATA	1410	17	50	0	0	A_44_P288443	NM_001108878	4832.21	295.955	2.219419e+002	2.246387e+001	267	39	9.205350e+000	0	0	0	0	0	0	203.782	1	1	46.1809	40.4615
DATA	1411	17	51	0	0	A_42_P748004	NM_001135873	4857.23	295.742	7.095804e+002	7.104368e+001	696.5	37.5	6.182376e+000	0	0	0	0	0	0	648.367	1	1	45.4864	38.1875
DATA	1412	17	52	0	0	A_64_P067310	NM_001139507	4883	296.455	1.954310e+003	1.954625e+002	1846.5	37	6.716827e+000	0	0	0	0	0	0	1776.69	1	1	55.8519	37.5172
DATA	1413	17	53	0	0	A_44_P210809	NM_001107334	4908.08	295.891	1.536741e+002	1.576604e+001	204	41	8.843527e+000	0	0	0	0	0	0	138.996	1	1	45.835	41.8519
DATA	1414	17	54	1028	1	(+)E1A_r60_a104	E1A_r60_a104	4933.67	296.5	3.554557e+000	3.541370e+000	65	36	8.026569e+000	0	0	0	0	0	0	-0.686659	0	0	65	37.6774
DATA	1415	17	55	0	0	A_44_P1042711	NM_001108426	4959.33	296.5	7.131126e+001	7.970542e+000	126.5	37	5.529316e+000	0	0	0	0	0	0	63.8201	1	1	65	38.64
DATA	1416	17	56	0	0	A_42_P661992	TC596141	4984.5	296.5	2.608151e+002	2.632599e+001	296.5	42	7.522562e+000	0	0	0	0	0	0	232.177	1	1	57.5363	39.9565
DATA	1417	17	57	0	0	A_42_P565621	NM_001105971	5010	295.705	8.643867e+001	9.363252e+000	142	38	8.149249e+000	0	0	0	0	0	0	76.5254	1	1	44.0646	37.1111
DATA	1418	17	58	0	0	A_44_P264600	NM_001013132	5035.24	296	4.703446e+001	5.934449e+000	104	40	8.412254e+000	0	0	0	0	0	0	41.4152	1	1	46.8651	40.1379
DATA	1419	17	59	0	0	A_64_P034901	TC591400	5060.62	296.225	6.997200e+000	3.705299e+000	69.5	44	9.171465e+000	0	0	0	0	0	0	6.12755	1	0	47.5395	41.5172
DATA	1420	17	60	0	0	A_42_P468216	NM_001030026	5086.22	296.417	1.095957e+003	1.096567e+002	1012	40	7.142558e+000	0	0	0	1	0	0	954.439	1	1	47.8731	40.625
DATA	1421	17	61	0	0	A_64_P062855	XM_343708	5111.5	296.5	2.248719e+001	4.311779e+000	83	43	5.265295e+000	0	0	0	0	0	0	19.4765	1	1	57.5363	41.84
DATA	1422	17	62	0	0	A_64_P048421	AABR03055399	5136.95	296.523	3.713017e+000	3.714877e+000	68	42	9.692933e+000	0	0	0	0	0	0	2.93266	0	0	55.8519	40.6
DATA	1423	17	63	0	0	A_44_P342166	NM_013187	5162.35	296.478	1.223924e+002	1.279194e+001	168	42.5	1.205013e+001	0	0	0	0	0	0	104.851	1	1	47.5395	42.0333
DATA	1424	17	64	0	0	A_42_P748154	XM_001059949	5187.6	296.438	1.587945e+003	1.588385e+002	1416	46.5	1.178709e+001	0	0	0	1	0	0	1353.06	1	1	48.2044	47.1538
DATA	1425	17	65	0	0	A_64_P157763	A_64_P157763	5213.03	296.303	5.596561e+002	5.609175e+001	536	43	9.242492e+000	0	0	0	0	0	0	474.327	1	1	49.1849	45.9032
DATA	1426	17	66	0	0	A_64_P155645	NM_022706	5238.38	296.237	8.974346e+003	8.974426e+002	7560.5	41.5	7.886843e+000	0	0	0	0	0	0	7566.24	1	1	49.1849	41.7333
DATA	1427	17	67	0	0	A_42_P622436	NM_022298	5264	296.545	4.824960e+004	4.824961e+003	39360.5	42.5	1.043957e+001	0	0	0	0	0	0	40469.3	1	1	55.8519	44.2308
DATA	1428	17	68	0	0	A_44_P304190	NM_001014044	5289.42	296.573	1.073455e+002	1.139336e+001	151.5	41.5	8.017581e+000	0	0	0	0	0	0	89.5846	1	1	57.5363	41.8333
DATA	1429	17	69	1028	1	(+)E1A_r60_a104	E1A_r60_a104	5314.91	296.393	3.851233e+000	3.836945e+000	60.5	40	5.754662e+000	0	0	0	0	0	0	-2.93876	0	0	53.2255	41.129
DATA	1430	17	70	0	0	A_42_P771373	NM_012614	5339.87	296.5	4.409753e+003	4.409922e+002	3674.5	39	6.392446e+000	0	0	0	1	0	0	3645.17	1	1	49.8279	39.4324
DATA	1431	17	71	0	0	A_64_P101976	A_64_P101976	5365.79	296.423	2.603436e+001	4.666433e+000	84	38	8.525707e+000	0	0	0	0	0	0	21.4208	1	1	47.5395	39.9189
DATA	1432	17	72	0	0	A_42_P777935	ENSRNOT00000027369	5390.83	296.829	1.355323e+002	1.410019e+001	174	43	8.330730e+000	0	0	0	0	0	0	111.042	1	1	46.8651	41.5882
DATA	1433	17	73	0	0	A_64_P041521	NM_012945	5416.42	296.573	9.249756e+001	1.004043e+001	136	39	9.633557e+000	0	0	0	0	0	0	75.4684	1	1	57.5363	40.3448
DATA	1434	17	74	0	0	A_44_P102661	NM_138862	5441.2	296.443	6.197358e+002	6.209744e+001	561.5	40	7.024096e+000	0	0	0	0	0	0	503.727	1	1	47.5395	39.2
DATA	1435	17	75	0	0	A_42_P714166	NM_001017491	5467.09	296.935	3.949159e+000	3.950966e+000	62	41.5	7.991364e+000	0	0	0	0	0	0	2.91756	0	0	54.4085	40.5938
DATA	1436	17	76	0	0	A_64_P098703	NM_198728	5492.53	296.929	5.713409e+002	5.727030e+001	540	51	1.120223e+001	0	0	0	0	0	0	461.173	1	1	47.8731	51.5185
DATA	1437	17	77	0	0	A_44_P624151	NM_001107932	5517.8	297.054	2.516606e+002	2.547562e+001	267.5	48	1.158222e+001	0	0	0	0	0	0	202.531	1	1	47.8731	48.0909
DATA	1438	17	78	0	0	A_42_P674843	NM_001008880	5543.5	297	8.837565e+002	8.846478e+001	786	46	1.007707e+001	0	0	0	0	0	0	709.308	1	1	54.1152	45.7879
DATA	1439	17	79	0	0	A_44_P1039634	NM_001108924	5568.71	297.087	6.572850e+001	7.683476e+000	112.5	43.5	8.854721e+000	0	0	0	0	0	0	52.634	1	1	46.1809	44.0357
DATA	1440	17	80	0	0	A_42_P517253	NM_001012275	5594	297	2.786297e+002	2.814675e+001	292	40	9.560455e+000	0	0	0	0	0	0	222.693	1	1	54.9904	41.3333
DATA	1441	17	81	0	0	A_42_P485589	NM_017246	5619.43	296.738	1.001843e+002	1.078482e+001	139	36.5	9.077001e+000	0	0	0	0	0	0	79.9486	1	1	45.835	38.2333
DATA	1442	17	82	66	1	DarkCorner	DarkCorner	5644.5	297	4.011954e+000	3.997070e+000	57.5	37	8.135724e+000	0	0	0	0	0	0	-2.25938	0	0	65	39.24
DATA	1443	17	83	66	1	DarkCorner	DarkCorner	5670.32	296.571	4.014623e+000	3.999728e+000	54.5	39.5	7.788090e+000	0	0	0	0	0	0	-4.52983	0	0	41.8414	39.6842
DATA	1444	17	84	66	1	DarkCorner	DarkCorner	5695.28	297.342	4.014849e+000	3.999954e+000	53	37	6.123724e+000	0	0	0	0	0	0	-6.66838	0	0	48.8603	38
DATA	1445	17	85	66	1	DarkCorner	DarkCorner	5721.44	297.372	4.013222e+000	4.000320e+000	62	37	7.631790e+000	0	0	0	0	0	0	1.00477	0	0	50.7771	36.8723
DATA	1446	18	1	66	1	DarkCorner	DarkCorner	3600.75	302.494	3.460295e+000	3.461812e+000	63	37	7.126484e+000	0	0	0	0	0	0	2.91084	0	0	49.8279	36.2821
DATA	1447	18	2	66	1	DarkCorner	DarkCorner	3625.2	302.508	3.447511e+000	3.434720e+000	56.5	41	1.010312e+001	0	0	0	0	0	0	-4.75521	0	0	45.4864	41.3889
DATA	1448	18	3	66	1	DarkCorner	DarkCorner	3651.42	302.573	3.434023e+000	3.421283e+000	56	42	7.489413e+000	0	0	0	0	0	0	-4.58328	0	0	57.5363	42.6739
DATA	1449	18	4	0	0	A_42_P608713	TC595074	3676.63	302.64	3.213470e+002	3.231498e+001	364	41.5	8.372574e+000	0	0	0	0	0	0	300.396	1	1	48.8603	40.5
DATA	1450	18	5	0	0	A_44_P411771	XM_001056376	3701.68	302.654	2.707289e+002	2.728510e+001	325	42	8.302084e+000	0	0	0	0	0	0	253.992	1	1	50.7771	41.0357
DATA	1451	18	6	0	0	A_42_P703647	NM_001108688	3727.58	302.573	1.065560e+001	3.547844e+000	72	41	9.860979e+000	0	0	0	0	0	0	10.0333	1	0	57.5363	42.1034
DATA	1452	18	7	0	0	A_64_P139212	NM_001030052	3752.69	302.662	9.334705e+003	9.334766e+002	8796	40	1.021943e+001	0	0	0	0	0	0	8819.69	1	1	48.5334	40.6667
DATA	1453	18	8	0	0	A_64_P082461	FQ211879	3778.12	302.616	8.057413e+001	8.730368e+000	141	43.5	9.982239e+000	0	0	0	0	0	0	76.3847	1	1	48.5334	43.7632
DATA	1454	18	9	0	0	A_64_P144053	NM_001108100	3803.37	302.36	1.962280e+002	1.990677e+001	248.5	42	7.449327e+000	0	0	0	0	0	0	186.622	1	1	48.8603	42.3226
DATA	1455	18	10	0	0	A_42_P455802	NM_001013929	3828.81	302.533	1.971137e+003	1.971420e+002	1938.5	38	8.084072e+000	0	0	0	0	0	0	1880.49	1	1	49.5074	40.069
DATA	1456	18	11	0	0	A_44_P575367	ENSRNOT00000068160	3854.5	302.648	9.739593e+000	3.469535e+000	70	42	7.101422e+000	0	0	0	0	0	0	9.31952	1	0	57.5363	41.7407
DATA	1457	18	12	0	0	A_64_P008259	ENSRNOT00000040453	3880	303	2.324885e+003	2.325122e+002	2310	44	8.170758e+000	0	0	0	0	0	0	2230.9	1	1	54.9904	43.8065
DATA	1458	18	13	0	0	A_44_P433935	NM_001024894	3905.5	303	1.077911e+001	3.482845e+000	72.5	43	7.644311e+000	0	0	0	0	0	0	10.3708	1	0	54.1152	43.625
DATA	1459	18	14	0	0	A_64_P027747	TC585156	3930.35	302.88	3.949760e+003	3.949898e+002	3815	42.5	4.851415e+000	0	0	0	0	0	0	3809.36	1	1	48.8603	41.8333
DATA	1460	18	15	0	0	A_44_P247880	ENSRNOT00000032333	3956.3	302.986	1.422932e+001	3.590116e+000	74	45	6.373905e+000	0	0	0	0	0	0	13.7558	1	0	47.2035	43.28
DATA	1461	18	16	0	0	A_44_P422321	NM_001105813	3981.08	302.901	9.118196e+002	9.124127e+001	937	40	1.035263e+001	0	0	0	0	0	0	883.297	1	1	46.8651	42.45
DATA	1462	18	17	0	0	A_44_P374824	ENSRNOT00000025777	4007	303	2.034837e+001	3.862324e+000	81	38	8.679478e+000	0	0	0	0	0	0	19.7507	1	1	54.9904	39.6667
DATA	1463	18	18	0	0	A_64_P029482	A_64_P029482	4032.5	303	6.260019e+001	7.065941e+000	126	44	8.524475e+000	0	0	0	0	0	0	60.8668	1	1	54.1152	44.1667
DATA	1464	18	19	0	0	A_64_P083918	NM_053396	4057.5	303	1.000686e+001	3.421819e+000	72.5	38	5.459861e+000	0	0	0	0	0	0	9.7444	1	0	54.1152	38.3143
DATA	1465	18	20	1028	1	(+)E1A_r60_3	E1A_r60_3	4083.39	303.069	2.085357e+001	3.876522e+000	83	39	8.579538e+000	0	0	0	0	0	0	20.3339	1	1	53.8203	39.1429
DATA	1466	18	21	0	0	A_42_P508415	CV108834	4108.5	303	9.756531e+001	1.028812e+001	159	38	7.585002e+000	0	0	0	0	0	0	95.2381	1	1	54.1152	40.125
DATA	1467	18	22	0	0	A_64_P018331	NM_001107720	4133.44	303.027	1.242540e+003	1.242968e+002	1253	44.5	1.306465e+001	0	0	0	0	0	0	1213.96	1	1	48.5334	47.7333
DATA	1468	18	23	0	0	A_64_P142056	NM_001011938	4159.87	302.792	4.591389e+003	4.591505e+002	4589	51	1.441954e+001	0	0	0	0	1	0	4488.91	1	1	48.5334	54
DATA	1469	18	24	0	0	A_44_P1030098	NM_001105866	4184.58	303.427	1.095392e+002	1.142808e+001	168.5	60	3.052265e+001	0	0	0	0	1	0	107.142	1	1	57.5363	71.2174
DATA	1470	18	25	0	0	A_64_P125958	NM_177933	4210.09	303.386	5.381686e+001	6.290506e+000	116.5	67	4.059309e+001	0	0	0	0	1	0	52.6507	1	1	57.259	79.5278
DATA	1471	18	26	0	0	A_64_P002066	XM_001056138	4235.5	303.352	4.617049e+001	5.650242e+000	104	59.5	3.938745e+001	0	0	0	0	1	0	45.1696	1	1	57.5363	75.6667
DATA	1472	18	27	0	0	A_42_P521242	ENSRNOT00000003841	4260.61	302.775	3.290852e+002	3.306938e+001	390	45	1.114181e+001	0	0	0	0	0	0	321.873	1	1	47.5395	46.16
DATA	1473	18	28	0	0	A_42_P652827	NM_001024274	4286.03	302.723	1.324626e+003	1.325027e+002	1331	42.5	8.224689e+000	0	0	0	0	0	0	1294.99	1	1	45.4864	44.3571
DATA	1474	18	29	0	0	A_42_P533792	NM_001106575	4311.38	303	4.889510e+003	4.889619e+002	4729	44	8.513104e+000	0	0	0	0	0	0	4776.82	1	1	48.5334	44.6296
DATA	1475	18	30	1028	1	(+)E1A_r60_1	E1A_r60_1	4337	303.455	3.276763e+000	3.264606e+000	63	43	1.107216e+001	0	0	0	0	0	0	-0.397355	0	0	65	43.7941
DATA	1476	18	31	0	0	A_64_P210103	NM_001100666	4362.42	303.299	6.201852e+001	7.010386e+000	122.5	41	1.012088e+001	0	0	0	0	0	0	60.4623	1	1	46.5243	41.9677
DATA	1477	18	32	0	0	A_64_P131745	A_64_P131745	4387.67	303.5	4.369796e+001	5.459597e+000	103	44	8.886501e+000	0	0	0	0	0	0	42.5427	1	1	57.5363	42.3548
DATA	1478	18	33	0	0	A_64_P017791	XM_002727063	4413.42	303.427	3.290537e+000	3.289336e+000	65	43	1.173678e+001	0	0	0	0	0	0	2.61326	0	0	57.5363	43.5758
DATA	1479	18	34	0	0	A_42_P560288	NM_198788	4438.19	302.957	5.139098e+003	5.139203e+002	5076.5	40	1.012544e+001	0	0	0	0	0	0	4985.93	1	1	46.8651	41.8966
DATA	1480	18	35	0	0	A_42_P571463	NM_001013221	4464.05	303.477	7.781254e+002	7.788212e+001	828	43.5	1.225952e+001	0	0	0	0	0	0	753.35	1	1	55.8519	45.6471
DATA	1481	18	36	0	0	A_42_P648207	NM_001013882	4489.5	303.5	3.221856e+002	3.238700e+001	378	37	1.122062e+001	0	0	0	0	0	0	311.21	1	1	57.5363	41.0313
DATA	1482	18	37	0	0	A_64_P120833	NM_131910	4514.63	303.36	6.350066e+003	6.350152e+002	5994.5	38.5	7.165301e+000	0	0	0	0	0	0	6118.46	1	1	48.8603	38.6923
DATA	1483	18	38	0	0	A_42_P705337	TC582694	4539.86	303.278	1.840796e+003	1.841094e+002	1778.5	43	8.143365e+000	0	0	0	0	0	0	1768.84	1	1	47.8731	41.2424
DATA	1484	18	39	0	0	A_44_P544340	NM_001034939	4565.37	303.427	2.205543e+002	2.230478e+001	278	37	1.041846e+001	0	0	0	0	0	0	211.309	1	1	49.1849	38.4828
DATA	1486	18	41	0	0	A_44_P310596	NM_001014166	4616.09	302.672	4.370304e+002	4.383106e+001	472	42	9.646549e+000	0	0	0	0	0	0	415.991	1	1	45.1352	41.5484
DATA	1487	18	42	0	0	A_64_P013409	A_64_P013409	4641.34	303.407	3.371807e+000	3.359433e+000	63	39	7.177199e+000	0	0	0	0	0	0	0.286638	0	0	42.5954	39.775
DATA	1488	18	43	0	0	A_64_P076485	A_64_P076485	4667.06	303.224	2.012842e+003	2.013125e+002	1993	39	7.566639e+000	0	0	0	0	0	0	1902.02	1	1	45.835	40.1875
DATA	1489	18	44	0	0	A_64_P096121	ENSRNOT00000028891	4692.5	303.5	4.744749e+001	5.828614e+000	108	43	1.001020e+001	0	0	0	0	0	0	44.6601	1	1	65	43.9118
DATA	1490	18	45	0	0	A_42_P521086	NM_001100857	4718	303.545	6.178163e+001	7.051550e+000	118	45	9.812917e+000	0	0	0	0	0	0	57.9137	1	1	55.8519	45.28
DATA	1491	18	46	0	0	A_64_P143133	TC637520	4743	303.104	3.950357e+001	5.220894e+000	99	38	9.662239e+000	0	0	0	0	0	0	36.8747	1	1	48.5334	38.4054
DATA	1492	18	47	0	0	A_64_P067163	NM_017248	4768.58	303.573	2.639374e+004	2.639376e+003	24238	43	1.544850e+001	0	0	0	0	0	0	24528.4	1	1	57.5363	47.2857
DATA	1493	18	48	0	0	A_64_P118288	NM_053448	4793.93	303.583	3.315749e+002	3.333592e+001	371.5	44	1.370721e+001	0	0	0	0	0	0	306.74	1	1	48.2044	45.4643
DATA	1494	18	49	0	0	A_64_P112342	A_64_P112342	4819.58	303.573	4.756948e+001	5.882668e+000	106.5	38	9.330811e+000	0	0	0	0	0	0	43.7977	1	1	57.5363	39.7241
DATA	1495	18	50	0	0	A_64_P074741	NM_001077680	4845	303.545	4.645711e+001	5.803148e+000	108	38	6.819327e+000	0	0	0	0	0	0	42.5667	1	1	55.8519	39.3548
DATA	1496	18	51	0	0	A_64_P153062	NM_001107890	4870.42	303.573	1.130247e+002	1.183049e+001	164.5	37	6.660068e+000	0	0	0	0	0	0	103.047	1	1	57.5363	37.6471
DATA	1497	18	52	0	0	A_64_P051942	A_64_P051942	4895.58	303.573	3.008106e+002	3.028544e+001	341.5	42	1.021925e+001	0	0	0	0	0	0	272.88	1	1	57.5363	43.4583
DATA	1498	18	53	0	0	A_44_P233080	ENSRNOT00000026303	4920.85	303.587	3.633028e+003	3.633200e+002	3236	37.5	8.898309e+000	0	0	0	0	0	0	3278.8	1	1	48.8603	38.9286
DATA	1499	18	54	0	0	A_64_P127747	A_64_P127747	4946.25	303.644	1.837231e+002	1.871200e+001	228.5	37	8.757236e+000	0	0	0	0	0	0	164.941	1	1	48.5334	39.2432
DATA	1500	18	55	0	0	A_42_P773155	NM_001106996	4971.44	303.74	2.086794e+004	2.086797e+003	18452.5	39	6.251382e+000	0	0	0	0	0	0	18635.9	1	1	49.5074	40.1852
DATA	1501	18	56	0	0	A_64_P003624	NM_175591	4997.42	303.573	3.321820e+001	4.889458e+000	92	40	6.015402e+000	0	0	0	0	0	0	29.5018	1	1	57.5363	40.5667
DATA	1502	18	57	0	0	A_64_P148728	NM_030989	5022.74	303.682	1.884752e+002	1.918962e+001	233.5	40	8.207220e+000	0	0	0	0	0	0	166.484	1	1	45.4864	37.8929
DATA	1503	18	58	0	0	A_44_P436284	ENSRNOT00000031389	5047.89	303.857	2.163018e+002	2.193214e+001	254	39	8.710408e+000	0	0	0	0	0	0	190.034	1	1	46.8651	37.6061
DATA	1504	18	59	0	0	A_42_P626851	NM_001107917	5073.24	303.642	5.512897e+002	5.524946e+001	548	44	1.039814e+001	0	0	0	0	0	0	481.685	1	1	46.1809	41.6061
DATA	1505	18	60	0	0	A_42_P797303	TC587453	5098.67	303.75	7.561368e+003	7.561457e+002	6608	42	5.703750e+000	0	0	0	0	0	0	6570.45	1	1	47.5395	41.0741
DATA	1506	18	61	0	0	A_64_P096312	A_64_P096312	5124.16	303.882	4.253390e+003	4.253550e+002	3801	42	9.154101e+000	0	0	0	0	0	0	3675.71	1	1	46.5243	40.6923
DATA	1507	18	62	0	0	A_64_P150894	A_64_P150894	5149.38	304	1.856590e+002	1.893241e+001	226	37	1.069840e+001	0	0	0	0	0	0	159.577	1	1	48.5334	39.2069
DATA	1508	18	63	0	0	A_64_P241372	NM_001000593	5175.18	303.754	2.252202e+001	4.355278e+000	79.5	45.5	1.385433e+001	0	0	0	0	0	0	19.2514	1	1	42.9674	47.1563
DATA	1509	18	64	0	0	A_44_P433621	NM_001025016	5200.5	304	1.626507e+002	1.669123e+001	200	53	1.343906e+001	0	0	0	0	0	0	138.292	1	1	54.1152	50.5862
DATA	1510	18	65	0	0	A_64_P163511	NM_013190	5225.6	303.643	9.871948e+002	9.879134e+001	902	41	8.402448e+000	0	0	0	0	0	0	834.957	1	1	47.2035	42.7037
DATA	1511	18	66	0	0	A_44_P129412	AF155959	5251.41	303.634	7.721796e+002	7.731078e+001	711.5	43.5	1.010320e+001	0	0	0	0	0	0	649.664	1	1	47.2035	43.8333
DATA	1512	18	67	0	0	A_64_P143037	NM_001025134	5276.39	303.681	3.538428e+002	3.558841e+001	353.5	43	8.221343e+000	0	0	0	0	0	0	296.219	1	1	46.8651	43.0952
DATA	1513	18	68	0	0	A_64_P032693	XM_002724830	5301.46	304	1.940915e+001	4.289078e+000	79.5	40	6.106714e+000	0	0	0	0	0	0	16.1696	1	1	42.9674	40.8667
DATA	1514	18	69	0	0	A_42_P727368	NM_001025693	5327.5	304.352	4.637927e+001	6.023552e+000	102	41.5	6.030835e+000	0	0	0	0	0	0	38.4497	1	1	57.5363	41.375
DATA	1515	18	70	0	0	A_64_P075765	A_64_P075765	5352.95	304.7	2.364700e+001	4.527832e+000	81.5	37	8.255004e+000	0	0	0	0	0	0	19.514	1	1	43.7019	38.2632
DATA	1516	18	71	0	0	A_42_P639174	NM_001106592	5377.87	304.079	9.581659e+002	9.589505e+001	820.5	39	8.568119e+000	0	0	0	0	0	0	787.224	1	1	47.8731	40.2647
DATA	1517	18	72	0	0	A_64_P063135	NM_001109623	5403.53	304.076	4.626756e+001	6.047901e+000	101	39	7.337400e+000	0	0	0	0	0	0	37.8513	1	1	45.1352	38.8621
DATA	1518	18	73	0	0	A_64_P018236	NM_001108882	5429	304.455	3.924941e+000	3.929249e+000	66	39	1.202753e+001	0	0	0	0	0	0	3.13404	0	0	65	41.9286
DATA	1519	18	74	0	0	A_43_P14648	NM_001012034	5454.09	303.672	4.940510e+002	4.956077e+001	465	40	7.862964e+000	0	0	0	0	0	0	401.071	1	1	45.1352	38.8529
DATA	1520	18	75	0	0	A_42_P698520	NM_001108216	5479.7	303.826	4.785550e+003	4.785712e+002	3854	45	7.705499e+000	0	0	0	0	0	0	3871.45	1	1	46.8651	44.7333
DATA	1521	18	76	0	0	A_43_P19450	NM_001105713	5505.3	304.243	1.469573e+002	1.521762e+001	180.5	50	1.149666e+001	0	0	0	0	0	0	118.513	1	1	47.2035	48.8929
DATA	1522	18	77	0	0	A_64_P013012	XM_225619	5530.58	304.427	2.993321e+002	3.019431e+001	301	47.5	1.147756e+001	0	0	0	0	0	0	240.72	1	1	57.5363	48.3
DATA	1523	18	78	0	0	A_42_P499684	NM_001108642	5555.79	304.125	2.281085e+002	2.315411e+001	243	47	9.112928e+000	0	0	0	1	0	0	182.986	1	1	47.5395	45.5
DATA	1524	18	79	0	0	A_64_P297479	ENSRNOT00000044350	5581.31	304.338	1.202572e+004	1.202579e+003	9667	42	7.902633e+000	0	0	0	0	0	0	9626.59	1	1	48.5334	42.4194
DATA	1525	18	80	0	0	A_64_P103238	NM_001014158	5606.5	304.231	1.741195e+002	1.786267e+001	199	38	1.026232e+001	0	0	0	0	0	0	139.144	1	1	49.8279	40.3793
DATA	1526	18	81	0	0	A_42_P751562	NM_001037355	5632.01	303.903	3.928574e+003	3.928777e+002	3141	36	8.672178e+000	0	0	0	0	0	0	3135.25	1	1	46.8651	38.04
DATA	1527	18	82	66	1	DarkCorner	DarkCorner	5657.5	304.5	4.010726e+000	3.995845e+000	57	37.5	8.391083e+000	0	0	0	0	0	0	-2.79687	0	0	57.5363	38.9063
DATA	1528	18	83	66	1	DarkCorner	DarkCorner	5683.21	305.258	4.011948e+000	3.997064e+000	61	37	7.581876e+000	0	0	0	0	0	0	-0.928788	0	0	45.835	38.2121
DATA	1529	18	84	66	1	DarkCorner	DarkCorner	5708.42	304.427	4.011729e+000	3.996845e+000	58	38	5.395902e+000	0	0	0	0	0	0	-1.48233	0	0	57.5363	38.4828
DATA	1530	18	85	66	1	DarkCorner	DarkCorner	5733.5	304.5	4.009106e+000	4.003460e+000	62	34	7.153336e+000	0	0	0	0	0	0	2.16723	0	0	57.5363	35.288
DATA	1531	19	1	66	1	DarkCorner	DarkCorner	3588	310	3.465704e+000	3.452846e+000	60	34	7.475442e+000	0	0	0	0	0	0	-0.657994	0	0	54.9904	35.0245
DATA	1532	19	2	66	1	DarkCorner	DarkCorner	3612.73	309.424	3.452870e+000	3.440060e+000	58.5	35	7.006916e+000	0	0	0	0	0	0	-2.97064	0	0	45.1352	36.5926
DATA	1533	19	3	66	1	DarkCorner	DarkCorner	3638.65	309.583	3.439482e+000	3.426722e+000	59	41	8.875521e+000	0	0	0	0	0	0	-1.47596	0	0	42.9674	40.2609
DATA	1534	19	4	66	1	DarkCorner	DarkCorner	3663.97	309.825	3.426640e+000	3.413927e+000	57	42	7.372505e+000	0	0	0	0	0	0	-3.72384	0	0	45.4864	41.9688
DATA	1535	19	5	0	0	A_44_P198705	NM_012578	3689.07	309.786	6.517679e+003	6.517768e+002	6024	42	8.575457e+000	0	0	0	0	0	0	6105.42	1	1	46.8651	40
DATA	1536	19	6	0	0	A_42_P604252	NM_001108797	3714.5	310	5.435715e+002	5.446272e+001	564	38	8.124505e+000	0	0	0	0	0	0	511.028	1	1	48.5334	39.4848
DATA	1537	19	7	0	0	A_43_P20016	NM_001107377	3740.5	310	6.679666e+001	7.484880e+000	124	43	1.029660e+001	0	0	0	0	0	0	63.0229	1	1	54.1152	43.4074
DATA	1538	19	8	0	0	A_42_P491486	NM_022533	3765.2	310	3.213552e+003	3.213728e+002	3050	45	8.813195e+000	0	0	0	0	0	0	3042.02	1	1	49.1849	43.6207
DATA	1539	19	9	0	0	A_64_P345929	NM_001191639	3791.15	309.918	1.326041e+001	3.607391e+000	74.5	40	8.147422e+000	0	0	0	0	0	0	12.5947	1	0	45.1352	41.6585
DATA	1540	19	10	0	0	A_64_P152047	NM_001000521	3816.29	309.917	5.175650e+000	3.384192e+000	67.5	38	7.775528e+000	0	0	0	0	0	0	4.93117	1	0	47.8731	39.2564
DATA	1541	19	11	0	0	A_42_P724510	NM_001007625	3841.51	309.87	7.538740e+003	7.538813e+002	7142.5	41	7.225418e+000	0	0	0	0	0	0	7204.16	1	1	47.2035	42.04
DATA	1542	19	12	0	0	A_42_P552906	NM_001007701	3867.11	309.652	1.520080e+003	1.520444e+002	1525	41	7.960468e+000	0	0	0	0	0	0	1456.82	1	1	45.835	41.5357
DATA	1543	19	13	0	0	A_64_P121673	A_64_P121673	3892.58	310.427	1.137881e+001	3.505485e+000	75	42.5	9.655645e+000	0	0	0	0	0	0	10.9352	1	0	65	42.75
DATA	1544	19	14	0	0	A_64_P047470	NM_001008875	3918.09	310.386	3.010223e+001	4.472018e+000	91.5	42	5.360670e+000	0	0	0	0	0	0	29.0028	1	1	57.259	40.5667
DATA	1545	19	15	0	0	A_43_P14911	NM_031512	3943.5	310.352	4.089450e+001	5.254445e+000	103	45	8.561153e+000	0	0	0	0	0	0	39.4948	1	1	57.5363	44.28
DATA	1546	19	16	0	0	A_44_P117234	NM_001191788	3968.58	310.427	2.726586e+001	4.274647e+000	88	44	9.148142e+000	0	0	0	0	0	0	26.3899	1	1	57.5363	44.0333
DATA	1547	19	17	0	0	A_64_P066782	ENSRNOT00000046676	3994.42	310.427	1.948729e+002	1.976230e+001	252	38	9.117177e+000	0	0	0	0	0	0	188.999	1	1	57.5363	39.8605
DATA	1548	19	18	0	0	A_64_P125013	NM_019167	4019.58	310.427	3.084986e+004	3.084988e+003	29918	44.5	6.995823e+000	0	0	0	0	0	0	29974.1	1	1	57.5363	45.3077
DATA	1549	19	19	0	0	A_64_P143121	NM_001099510	4045	310.455	8.313355e+000	3.378066e+000	68.5	42	4.747469e+000	0	0	0	0	0	0	8.0905	1	0	55.8519	42.3333
DATA	1550	19	20	0	0	A_64_P065600	NM_022954	4070.42	310.427	3.281701e+000	3.269526e+000	61	37.5	5.808792e+000	0	0	0	0	0	0	-2.57825	0	0	57.5363	37.4722
DATA	1551	19	21	0	0	A_44_P300818	AF030087	4095.67	310.5	3.599499e+002	3.614282e+001	414.5	37	7.749460e+000	0	0	0	0	0	0	351.222	1	1	57.5363	37.1481
DATA	1552	19	22	0	0	A_64_P103130	A_64_P103130	4121	310.271	1.389999e+003	1.390381e+002	1461	38	7.861696e+000	0	0	0	0	0	0	1357.64	1	1	46.8651	40.037
DATA	1553	19	23	0	0	A_64_P064938	NM_001109332	4146.58	310.427	1.128683e+001	3.449641e+000	74	51	1.479494e+001	0	0	0	0	0	0	11.0328	1	0	65	51.9032
DATA	1554	19	24	0	0	A_64_P087276	NM_138527	4172	310.455	4.408684e+002	8.556717e+001	159	49	3.627988e+001	0	1	0	0	1	0	431.188	1	1	55.8519	66.3333
DATA	1555	19	25	0	0	A_64_P032728	NM_001037778	4197.15	309.903	7.697900e+003	7.697969e+002	7464.5	60	2.698657e+001	0	0	0	0	1	0	7531.3	1	1	46.8651	67.1429
DATA	1556	19	26	0	0	A_44_P956203	NM_001134992	4222.67	310.5	1.388193e+001	3.540027e+000	76	70.5	3.941245e+001	0	0	0	0	1	0	13.5832	1	0	65	84.3077
DATA	1557	19	27	0	0	A_64_P106488	A_64_P106488	4248.33	310.5	3.787616e+001	4.995327e+000	101.5	53	1.961423e+001	0	0	0	0	1	0	37.0566	1	1	57.5363	53.7778
DATA	1558	19	28	0	0	A_43_P10011	NM_001025274	4273.5	310.5	3.274512e+002	3.290680e+001	381	40.5	1.044917e+001	0	0	0	0	0	0	320.255	1	1	57.5363	44
DATA	1559	19	29	0	0	A_44_P321009	NM_012540	4298.89	310.5	3.463226e+000	3.278231e+000	65.5	41	8.927210e+000	0	0	0	0	0	0	3.38516	1	0	56.9804	42.5152
DATA	1560	19	30	0	0	A_44_P133453	XM_236776	4324.13	310.474	2.381202e+003	2.381426e+002	2398	46	1.296418e+001	0	0	0	0	0	0	2325.65	1	1	50.1463	43.8485
DATA	1561	19	31	0	0	A_64_P027323	NM_001000088	4349.67	310.5	5.698755e+001	6.568260e+000	120	47	1.555287e+001	0	0	0	0	0	0	55.6	1	1	57.5363	48.2593
DATA	1562	19	32	0	0	A_44_P374568	NM_001107778	4374.82	310.569	1.626475e+002	1.659021e+001	223	44	1.418154e+001	0	0	0	0	0	0	158.488	1	1	47.8731	45.129
DATA	1563	19	33	0	0	A_64_P040176	NM_001108498	4400.36	310.28	1.726998e+003	1.727309e+002	1662	47.5	1.322107e+001	0	0	0	0	0	0	1680.29	1	1	48.5334	47.5263
DATA	1564	19	34	0	0	A_64_P347204	ENSRNOT00000002350	4426	310.545	6.964623e+001	7.698627e+000	130	42	1.110696e+001	0	0	0	0	0	0	67.6448	1	1	55.8519	43.3103
DATA	1565	19	35	0	0	A_64_P142544	A_64_P142544	4451.42	310.573	8.118290e+000	3.385875e+000	71	41	9.982382e+000	0	0	0	0	0	0	7.86957	1	0	57.5363	43.4412
DATA	1566	19	36	0	0	A_64_P047367	NM_017050	4476.58	310.573	3.449602e+004	3.449604e+003	32870	46	1.267251e+001	0	0	0	0	0	0	33367.1	1	1	57.5363	48.1481
DATA	1567	19	37	0	0	A_64_P130858	NM_001003705	4502.42	310.573	5.035623e+001	6.021833e+000	110	37	9.030891e+000	0	0	0	0	0	0	48.5894	1	1	65	39.9032
DATA	1568	19	38	0	0	A_42_P647009	NM_053814	4527.15	310.836	1.295565e+003	1.295988e+002	1335	43	7.310833e+000	0	0	0	0	0	0	1246.94	1	1	47.5395	42
DATA	1569	19	39	0	0	A_42_P618538	NM_001030031	4552.92	310.893	5.155261e+002	5.165941e+001	567	43	1.040115e+001	0	0	0	0	0	0	494.755	1	1	47.5395	43.4643
DATA	1570	19	40	0	0	A_64_P048225	NM_001108643	4578.42	310.573	2.536976e+001	4.186585e+000	87.5	37.5	1.024773e+001	0	0	0	0	0	0	24.2732	1	1	57.5363	38.1176
DATA	1571	19	41	0	0	A_64_P044826	A_64_P044826	4603.51	310.203	8.498372e+001	9.131545e+000	143.5	38	1.018560e+001	0	0	0	0	0	0	81.0494	1	1	47.2035	41.1481
DATA	1572	19	42	0	0	A_64_P046273	NM_001168559	4629.12	310.397	1.526406e+002	1.562792e+001	208.5	43	8.952994e+000	0	0	0	0	0	0	145.071	1	1	48.5334	41.5122
DATA	1573	19	43	0	0	A_43_P16232	NM_024395	4654.25	310.356	1.024444e+003	1.024997e+002	1051.5	38	7.149848e+000	0	0	0	0	0	0	970.148	1	1	48.5334	38.0294
DATA	1574	19	44	0	0	A_44_P147356	XM_225859	4679.54	310.382	5.884318e+003	5.884415e+002	5650	39	7.664066e+000	0	0	0	0	0	0	5551.32	1	1	47.2035	41.3125
DATA	1575	19	45	0	0	A_44_P979417	ENSRNOT00000068382	4705.17	311	2.308658e+001	4.102368e+000	86	46	1.069213e+001	0	0	0	0	0	0	21.693	1	1	44.0646	44.1923
DATA	1576	19	46	0	0	A_44_P283784	NM_001107682	4730.24	310.971	3.387404e+002	3.404475e+001	380	38	1.081403e+001	0	0	0	0	0	0	316.988	1	1	46.1809	39.4545
DATA	1577	19	47	0	0	A_44_P112061	ENSRNOT00000046359	4756.28	310.893	3.382170e+002	3.399420e+001	386.5	38	1.096356e+001	0	0	0	0	0	0	315.095	1	1	48.8603	39.4595
DATA	1578	19	48	0	0	A_42_P541025	NM_212546	4781.43	310.829	1.436333e+002	1.476846e+001	197.5	43	1.315998e+001	0	0	0	0	0	0	133.221	1	1	49.1849	44.5806
DATA	1579	19	49	0	0	A_44_P156521	NM_001025135	4806.8	310.784	7.629285e+002	7.637088e+001	758	41	1.003839e+001	0	0	0	0	0	0	704.357	1	1	47.8731	42
DATA	1580	19	50	0	0	A_42_P562202	NM_001107959	4832.14	310.922	4.673888e+001	5.819864e+000	107	37	6.691194e+000	0	0	0	0	0	0	42.9463	1	1	45.835	38.1852
DATA	1581	19	51	0	0	A_42_P522899	NM_021578	4857.22	310.841	4.425112e+001	5.632401e+000	105	38.5	5.838589e+000	0	0	0	0	0	0	40.4645	1	1	46.1809	39.1765
DATA	1582	19	52	0	0	A_42_P581060	NM_001108722	4882.92	310.732	5.013232e+003	5.013354e+002	4485	38.5	6.987896e+000	0	0	0	0	0	0	4561.06	1	1	47.2035	38.6429
DATA	1583	19	53	0	1	ERCC-00043_129	ERCC-00043_129	4908.5	311	3.533417e+000	3.520308e+000	59	42	1.004142e+001	0	0	0	0	0	0	-3.66731	0	0	54.1152	44.4828
DATA	1584	19	54	0	0	A_64_P098577	A_64_P098577	4932.9	310.867	3.551139e+000	3.537964e+000	63	39	1.252421e+001	0	0	0	0	0	0	-0.439962	0	0	44.4243	42.4516
DATA	1585	19	55	0	0	A_64_P043164	ENSRNOT00000009696	4959.39	311.069	2.782653e+002	2.805301e+001	313	37	8.367218e+000	0	0	0	0	0	0	249.241	1	1	53.8203	37.3
DATA	1586	19	56	0	0	A_42_P576446	NM_001107673	4984.43	311.015	4.433820e+003	4.433964e+002	3924	39	7.721603e+000	0	0	0	0	0	0	3950.45	1	1	47.5395	39.1379
DATA	1587	19	57	0	0	A_42_P801593	NM_001134744	5009.85	310.574	9.747784e+002	9.754413e+001	917	40	9.535456e+000	0	0	0	0	0	0	863.8	1	1	46.5243	39.2703
DATA	1588	19	58	0	0	A_42_P535743	NM_199393	5035.09	310.672	2.134038e+003	2.134344e+002	1855.5	35	8.709756e+000	0	0	0	0	0	0	1880.88	1	1	45.1352	35.7879
DATA	1589	19	59	0	0	A_64_P051890	ENSRNOT00000056631	5060.58	311.427	2.393427e+001	4.352208e+000	85	41	7.199138e+000	0	0	0	0	0	0	20.9805	1	1	57.5363	40.5517
DATA	1590	19	60	0	0	A_64_P098379	NM_001013890	5086.42	311.427	4.390006e+000	3.681606e+000	67.5	44	7.177976e+000	0	0	0	0	0	0	3.82682	1	0	65	41.76
DATA	1591	19	61	0	0	A_64_P144513	XR_086096	5111.5	311.352	3.231635e+004	3.231637e+003	27900	43	5.273498e+000	0	0	0	0	0	0	28018.3	1	1	57.5363	42.375
DATA	1592	19	62	0	0	A_44_P325337	NM_001030041	5137	311.455	8.485709e+001	9.255442e+000	139	38	1.045406e+001	0	0	0	0	0	0	73.1691	1	1	55.8519	38.9286
DATA	1593	19	63	0	0	A_44_P142029	NM_001002851	5162.09	311.086	2.152568e+003	2.152888e+002	1889	39.5	9.923848e+000	0	0	0	0	0	0	1846.1	1	1	46.8651	40
DATA	1594	19	64	0	0	A_44_P292568	NM_001000207	5187.58	311.427	1.188357e+002	1.245683e+001	164	48	1.490363e+001	0	0	0	0	0	0	101.37	1	1	57.5363	49.5806
DATA	1595	19	65	0	0	A_42_P624092	XR_007263	5213	311	3.457348e+003	3.457552e+002	2981	41	7.788191e+000	0	0	0	1	0	0	2933.47	1	1	46.8651	42.5484
DATA	1596	19	66	0	0	A_42_P597322	NM_001103357	5238.22	311.097	2.552213e+002	2.579980e+001	278.5	43	8.904812e+000	0	0	0	0	0	0	215.429	1	1	47.5395	42.8837
DATA	1597	19	67	0	0	A_64_P034409	NM_001108146	5263.82	310.956	1.359824e+003	1.360353e+002	1205	40	8.681987e+000	0	0	0	0	0	0	1141.88	1	1	46.8651	41.7576
DATA	1598	19	68	0	0	A_64_P112797	NM_001001121	5289.42	310.894	3.770670e+002	3.789908e+001	373	40	7.888852e+000	0	0	0	0	0	0	315.038	1	1	45.4864	40.3448
DATA	1599	19	69	0	0	A_42_P761023	NM_001144870	5314.58	311.427	1.355977e+002	1.409084e+001	172	40	6.620315e+000	0	0	0	1	0	0	112.752	1	1	57.5363	40.6286
DATA	1600	19	70	0	0	A_42_P465408	NM_031647	5340.11	311.5	4.550850e+002	4.567108e+001	442	38	7.490787e+000	0	0	0	1	0	0	376.63	1	1	56.9804	37.7813
DATA	1601	19	71	0	0	A_64_P115761	NM_001109379	5365.57	311.6	1.211470e+001	4.052920e+000	73	36	8.675758e+000	0	0	0	0	0	0	9.98089	1	0	47.8731	38.8108
DATA	1602	19	72	0	0	A_64_P086487	A_64_P086487	5390.79	311.421	1.198639e+001	4.065049e+000	73	42	8.410055e+000	0	0	0	0	0	0	9.83274	1	0	42.9674	40.9355
DATA	1603	19	73	0	0	A_42_P774028	NM_001017447	5416.38	310.826	1.388196e+003	1.388743e+002	1195	37	8.129472e+000	0	0	0	0	0	0	1134.02	1	1	46.8651	38.6296
DATA	1604	19	74	0	0	A_44_P233080	ENSRNOT00000026303	5441.64	311.416	3.747832e+003	3.748037e+002	3127	42	9.331999e+000	0	0	0	0	0	0	3050.05	1	1	52.9257	39.5
DATA	1605	19	75	0	0	A_64_P078002	ENSRNOT00000056206	5467.11	311.5	1.203531e+001	4.109653e+000	71	42	8.808609e+000	0	0	0	0	0	0	9.75941	1	0	56.9804	42.7297
DATA	1606	19	76	0	0	A_64_P047888	A_64_P047888	5492.5	311.5	5.446586e+000	3.979913e+000	67	45	1.225350e+001	0	0	0	0	0	0	4.40207	1	0	57.5363	45.9259
DATA	1607	19	77	0	0	A_44_P236001	NM_001000623	5517.93	311.44	6.671409e+001	7.755276e+000	114	49.5	1.059524e+001	0	0	0	0	0	0	53.7585	1	1	48.8603	50.7917
DATA	1608	19	78	0	0	A_42_P819040	TC636720	5543.42	311.573	1.838345e+001	4.370271e+000	74	47	1.119955e+001	0	0	0	0	0	0	14.7742	1	0	57.5363	47.1333
DATA	1609	19	79	0	0	A_44_P168184	NM_001166675	5568.61	311.594	2.102999e+003	2.103375e+002	1774	41	9.320853e+000	0	0	0	0	0	0	1686.27	1	1	47.5395	43.2857
DATA	1610	19	80	0	0	A_64_P094925	NM_001024748	5594	311.545	1.594372e+002	1.643333e+001	188.5	39.5	9.391443e+000	0	0	0	0	0	0	127.598	1	1	55.8519	40.4722
DATA	1611	19	81	0	0	A_44_P332483	NM_173338	5619.42	311.573	4.002332e+000	3.989428e+000	61	38	9.508862e+000	0	0	0	0	0	0	0.995324	0	0	57.5363	39.4615
DATA	1612	19	82	0	0	A_42_P530071	NM_001107153	5644.69	311.338	4.286504e+003	4.286690e+002	3412.5	37	8.066638e+000	0	0	0	1	0	0	3421.62	1	1	48.5334	38.875
DATA	1613	19	83	66	1	DarkCorner	DarkCorner	5670.66	311.61	4.009093e+000	3.999966e+000	63	37	7.483315e+000	0	0	0	0	0	0	1.70987	0	0	49.8279	38
DATA	1614	19	84	66	1	DarkCorner	DarkCorner	5695.58	311.573	4.009586e+000	3.994710e+000	54	38	6.812405e+000	0	0	0	0	0	0	-7.64465	0	0	65	37.8621
DATA	1615	19	85	66	1	DarkCorner	DarkCorner	5720.9	311.825	4.007945e+000	4.002568e+000	62	38	7.980927e+000	0	0	0	0	0	0	2.19842	0	0	45.4864	38.1622
DATA	1616	20	1	66	1	DarkCorner	DarkCorner	3600.56	317.152	3.457855e+000	3.445026e+000	58	35.5	7.222616e+000	0	0	0	0	0	0	-1.32933	0	0	50.1463	36.5217
DATA	1617	20	2	66	1	DarkCorner	DarkCorner	3626	317.455	3.444680e+000	3.431900e+000	58	39	8.648872e+000	0	0	0	0	0	0	-1.82394	0	0	55.8519	38.8158
DATA	1618	20	3	66	1	DarkCorner	DarkCorner	3650.85	317.854	3.432006e+000	3.419273e+000	54	42	8.942593e+000	0	0	0	0	0	0	-6.53635	0	0	38.6789	40.5946
DATA	1619	20	4	0	0	A_42_P787775	NM_001127566	3676.67	317.06	3.016647e+002	3.035821e+001	348	44	6.713916e+000	0	0	0	0	0	0	282.166	1	1	45.835	42.92
DATA	1620	20	5	0	0	A_42_P607770	NM_001134616	3701.68	317.273	3.857753e+003	3.857903e+002	3508.5	41	9.197241e+000	0	0	0	0	0	0	3621.29	1	1	49.8279	41.4516
DATA	1621	20	6	0	0	A_42_P484738	NM_022266	3727.32	317.041	7.174488e+002	7.182456e+001	730	43	9.511747e+000	0	0	0	0	0	0	675.87	1	1	48.8603	43.16
DATA	1622	20	7	0	0	A_64_P075273	NM_031743	3753.11	317.5	2.052907e+002	2.080394e+001	255.5	41	1.043371e+001	0	0	0	0	0	0	194.071	1	1	56.9804	40.9355
DATA	1623	20	8	0	0	A_42_P674050	NM_001107225	3777.86	317.278	2.324972e+003	2.325215e+002	2264.5	42	8.053187e+000	0	0	0	0	0	0	2205.02	1	1	47.8731	43.1628
DATA	1624	20	9	1028	1	(+)E1A_r60_a107	E1A_r60_a107	3803.67	317.5	3.361276e+000	3.364744e+000	66	39	6.819597e+000	0	0	0	0	0	0	3.11252	0	0	65	40.1
DATA	1625	20	10	0	0	A_64_P144253	NM_201350	3829.33	317.5	1.211965e+001	3.551617e+000	72	38	7.669431e+000	0	0	0	0	0	0	11.5677	1	0	57.5363	39.3429
DATA	1626	20	11	0	0	A_44_P791729	NM_181377	3854.13	316.855	4.410385e+003	4.410510e+002	4263	42	1.001342e+001	0	0	0	0	0	0	4221.53	1	1	45.4864	42.25
DATA	1627	20	12	0	0	A_42_P550624	NM_001109319	3879.57	317.147	8.818219e+002	8.824466e+001	903	41	9.286276e+000	0	0	0	0	0	0	846.426	1	1	47.2035	42.2222
DATA	1628	20	13	0	0	A_43_P11580	NM_012833	3904.86	317.434	1.128411e+002	1.175983e+001	172	40.5	7.187217e+000	0	0	0	0	0	0	108.596	1	1	49.5074	40.2143
DATA	1629	20	14	0	0	A_44_P417055	XM_223442	3930.41	317.571	5.237227e+002	5.247630e+001	573	43.5	5.380958e+000	0	0	0	0	0	0	505.271	1	1	47.8731	44.4583
DATA	1630	20	15	0	0	A_64_P142867	A_64_P142867	3955.8	317.508	4.880514e+003	4.880626e+002	4836	40	8.615728e+000	0	0	0	0	0	0	4719.33	1	1	45.4864	41
DATA	1631	20	16	0	0	A_64_P013002	XM_001072551	3981.6	317.09	2.015191e+001	3.856610e+000	84	42	9.591242e+000	0	0	0	0	0	0	19.5279	1	1	46.1809	41.0889
DATA	1632	20	17	0	0	A_42_P457692	NM_001008363	4006.87	317.07	2.088328e+003	2.088585e+002	2070	38	7.285961e+000	0	0	0	0	0	0	2027.52	1	1	46.8651	38.9091
DATA	1633	20	18	0	0	A_42_P788480	NM_019194	4031.7	317.1	5.286040e+003	5.286142e+002	5036.5	43	8.585272e+000	0	0	0	0	0	0	5140.76	1	1	47.2035	43.7241
DATA	1634	20	19	0	0	A_42_P518462	NM_001007020	4057.34	317.23	3.529238e+003	3.529390e+002	3431	41	6.348655e+000	0	0	0	0	0	0	3437.54	1	1	48.8603	40.6552
DATA	1635	20	20	0	0	A_64_P007578	NM_001000851	4082.56	317.485	7.699508e+000	3.356611e+000	68	38.5	8.485281e+000	0	0	0	0	0	0	7.5093	1	0	62.3168	39
DATA	1636	20	21	0	0	A_64_P139350	NM_001191727	4108.5	317.648	4.629103e+001	5.663784e+000	108	37	6.865285e+000	0	0	0	0	0	0	45.1987	1	1	57.5363	37.9189
DATA	1637	20	22	0	0	A_64_P100442	ENSRNOT00000067861	4133.91	317.614	2.064869e+002	2.090453e+001	273	43	8.883866e+000	0	0	0	0	0	0	201.794	1	1	57.259	44
DATA	1638	20	23	1028	1	(+)E1A_r60_a135	E1A_r60_a135	4159.42	317.573	9.880996e+000	3.404847e+000	72	52	1.672482e+001	0	0	0	0	0	0	9.66291	1	0	57.5363	53.3571
DATA	1639	20	24	0	0	A_44_P459760	NM_001108187	4184.58	317.573	4.143576e+001	5.270332e+000	105.5	42	5.331845e+000	0	0	0	0	0	0	40.5393	1	1	57.5363	42.8571
DATA	1640	20	25	0	0	A_64_P115536	NM_212545	4210.09	317.614	1.074069e+001	3.428700e+000	73	54.5	4.018848e+001	0	0	0	0	1	0	10.5107	1	0	57.259	71.7
DATA	1641	20	26	0	0	A_44_P538406	NM_013102	4235.25	317.5	1.451401e+004	1.451404e+003	13827.5	57	3.957219e+001	0	0	0	0	1	0	14203.2	1	1	48.5334	74.7353
DATA	1642	20	27	0	0	A_64_P120871	NM_198743	4260.65	317.846	5.035363e+002	5.045884e+001	554	46	1.702997e+001	0	0	0	0	0	0	492.644	1	1	49.1849	48.5926
DATA	1643	20	28	0	0	A_44_P173048	NM_001009255	4285.99	317.71	6.931808e+002	6.939462e+001	740	48	1.168964e+001	0	0	0	0	0	0	677.876	1	1	46.1809	48.8276
DATA	1644	20	29	0	0	A_64_P058060	NM_001037541	4311.5	318	1.021188e+001	3.416747e+000	73.5	42	6.590808e+000	0	0	0	0	0	0	9.97958	1	0	65	43.8519
DATA	1645	20	30	0	0	A_64_P145982	NM_001109366	4337	318	3.179198e+001	4.556123e+000	94	51	2.772665e+001	0	0	0	0	1	0	31.0401	1	1	54.9904	59.7273
DATA	1646	20	31	0	0	A_42_P514244	NM_012791	4362.5	318	1.539346e+002	1.573640e+001	213	47	1.594333e+001	0	0	0	0	0	0	150.121	1	1	54.1152	48.7586
DATA	1648	20	33	0	0	A_64_P159155	XM_001071429	4413.5	318	5.633430e+001	9.455413e+000	100	50.5	1.289530e+001	0	0	0	0	0	0	54.7739	1	1	54.1152	49.1176
DATA	1649	20	34	0	0	A_64_P030272	ENSRNOT00000041731	4438.5	318	1.395639e+002	1.433734e+001	197	45.5	1.620377e+001	0	0	0	0	0	0	135.453	1	1	54.1152	49.7
DATA	1650	20	35	0	0	A_42_P733076	NM_001033867	4464	318	1.888314e+002	1.916759e+001	247	44	9.423663e+000	0	0	0	0	0	0	182.891	1	1	54.9904	45.3448
DATA	1651	20	36	0	0	A_44_P349475	NM_031333	4488.94	317.824	6.970514e+002	6.978308e+001	743	37	1.034623e+001	0	0	0	0	0	0	673.612	1	1	46.5243	40.3889
DATA	1652	20	37	0	0	A_64_P009848	NM_001034135	4514.44	318.027	2.363992e+003	2.364223e+002	2320	39.5	7.254408e+000	0	0	0	0	0	0	2278.8	1	1	48.5334	40.1667
DATA	1653	20	38	0	0	A_64_P116685	NM_001166763	4539.91	317.918	3.375349e+003	3.375512e+002	3302	42	8.162105e+000	0	0	0	0	0	0	3244.87	1	1	51.0895	41.3438
DATA	1654	20	39	0	0	A_64_P072659	NM_001109296	4565.34	317.706	8.594085e+002	8.600512e+001	885	39	9.894962e+000	0	0	0	0	0	0	823.767	1	1	46.1809	39.6563
DATA	1655	20	40	0	0	A_42_P808442	NM_001108759	4591.01	317.868	3.651168e+002	3.666365e+001	415	33	6.800541e+000	0	0	0	0	0	0	348.871	1	1	46.8651	34.8929
DATA	1656	20	41	0	0	A_64_P140836	NM_001017486	4615.9	317.657	5.196494e+001	6.180392e+000	110.5	42	1.085702e+001	0	0	0	0	0	0	49.4908	1	1	45.835	41.7368
DATA	1657	20	42	0	0	A_64_P034384	NM_019227	4641.58	318.427	1.608575e+002	1.643242e+001	216	42	7.035564e+000	0	0	0	0	0	0	152.659	1	1	57.5363	39.8286
DATA	1658	20	43	0	0	A_42_P730411	NM_001012181	4666.81	317.597	4.696494e+002	4.708569e+001	514.5	38	9.016501e+000	0	0	0	0	0	0	444.057	1	1	46.1809	40
DATA	1659	20	44	0	0	A_44_P396450	ENSRNOT00000018433	4692.37	317.735	9.423304e+001	1.001225e+001	153	44.5	1.144813e+001	0	0	0	0	0	0	88.7501	1	1	46.5243	45.0294
DATA	1660	20	45	0	0	A_44_P268610	NM_001109134	4717.66	318.122	2.724228e+003	2.724440e+002	2643	45	9.798299e+000	0	0	0	0	0	0	2555.39	1	1	48.8603	45.44
DATA	1661	20	46	0	0	A_64_P059105	NM_001134544	4743.42	318.427	6.230108e+001	7.102999e+000	122	37	8.852004e+000	0	0	0	0	0	0	58.1903	1	1	57.5363	37.2286
DATA	1662	20	47	0	0	A_42_P524851	NM_001130061	4768.58	318.427	5.693847e+002	5.704148e+001	565.5	40	1.290504e+001	0	0	0	0	0	0	529.506	1	1	57.5363	44.96
DATA	1663	20	48	0	0	A_64_P141675	FM127585	4793.94	318.056	8.762824e+002	8.769582e+001	856	41	9.140424e+000	0	0	0	0	0	0	811.206	1	1	46.8651	40.8788
DATA	1664	20	49	0	0	A_64_P002979	ENSRNOT00000034762	4819.57	318.079	3.471201e+000	3.459428e+000	63	38	8.334920e+000	0	0	0	0	0	0	0.805825	0	0	44.0646	39.2857
DATA	1665	20	50	0	0	A_44_P175822	NM_001109511	4844.94	317.825	1.477491e+002	1.517807e+001	202	37.5	6.110947e+000	0	0	0	0	0	0	135.477	1	1	45.4864	38.9667
DATA	1666	20	51	0	0	A_44_P1008751	NM_001137645	4870.45	317.597	8.677540e+001	9.353942e+000	138.5	39	5.170026e+000	0	0	0	0	0	0	79.1734	1	1	45.835	38.6667
DATA	1667	20	52	0	0	A_44_P255350	NM_001007674	4895.28	317.942	1.980111e+002	2.010972e+001	240	45.5	9.546530e+000	0	0	0	0	0	0	179.779	1	1	46.1809	44.1071
DATA	1668	20	53	0	0	A_64_P017328	NM_012758	4921.27	318.149	6.854159e+002	6.863233e+001	693	42.5	1.048129e+001	0	0	0	0	0	0	619.046	1	1	45.835	44.7333
DATA	1669	20	54	0	0	A_64_P132571	NM_001107703	4946.43	318.392	3.339895e+003	3.340083e+002	3122.5	36.5	9.944454e+000	0	0	0	0	0	0	3000.94	1	1	49.1849	37.3235
DATA	1670	20	55	0	0	A_44_P107535	NM_001170336	4971.89	318.5	3.104697e+002	3.125100e+001	341	39	7.528483e+000	0	0	0	0	0	0	277.484	1	1	56.9804	40.7037
DATA	1671	20	56	0	0	A_44_P353618	NM_053587	4996.85	318.403	5.792780e+001	6.811879e+000	114.5	39	8.896238e+000	0	0	0	0	0	0	51.5008	1	1	44.4243	38.7436
DATA	1672	20	57	0	0	A_44_P213336	A_44_P213336	5022.46	318.382	2.358451e+002	2.385824e+001	269.5	37	8.590301e+000	0	0	0	0	0	0	208.537	1	1	47.2035	38.8286
DATA	1673	20	58	0	0	A_42_P507072	FQ213070	5047.82	318.029	1.881063e+003	1.881412e+002	1736	41	8.357757e+000	0	0	0	0	0	0	1654.2	1	1	46.8651	39.9714
DATA	1674	20	59	0	0	A_44_P428886	NM_001099516	5073.41	318.247	1.089295e+002	1.148610e+001	159.5	38.5	9.868447e+000	0	0	0	0	0	0	95.267	1	1	48.5334	40.1429
DATA	1675	20	60	0	0	A_64_P086784	NM_001108657	5098.44	318.26	2.772752e+003	2.772994e+002	2374	43	5.429753e+000	0	0	0	0	0	0	2411.94	1	1	49.5074	40.8696
DATA	1676	20	61	0	0	A_42_P654682	NM_012724	5123.15	318.699	3.696194e+000	3.687807e+000	66	38.5	9.018632e+000	0	0	0	0	0	0	1.71435	0	0	48.2044	38.75
DATA	1677	20	62	0	0	A_44_P443008	NM_001013068	5149.38	318.5	3.116547e+002	3.138472e+001	332.5	36.5	8.705243e+000	0	0	0	0	0	0	268.156	1	1	48.5334	37.3438
DATA	1678	20	63	0	0	A_64_P027229	A_64_P027229	5175	318.545	1.020393e+003	1.021072e+002	963	40	1.031064e+001	0	0	0	0	0	0	873.211	1	1	55.8519	39.6333
DATA	1679	20	64	0	0	A_64_P134277	ENSRNOT00000029167	5200.42	318.573	6.473349e+001	7.477793e+000	118.5	46	1.356747e+001	0	0	0	0	0	0	55.1013	1	1	57.5363	44.8276
DATA	1680	20	65	0	0	A_64_P165548	XM_001055860	5225.69	318.415	6.782929e+001	7.756878e+000	122	43.5	9.592267e+000	0	0	0	0	0	0	57.4342	1	1	45.4864	43.5588
DATA	1681	20	66	0	0	A_64_P014737	NM_001000069	5251.42	318.573	1.355245e+001	4.018258e+000	72	44	9.193257e+000	0	0	0	0	0	0	11.4157	1	0	57.5363	43.8857
DATA	1682	20	67	0	0	A_42_P627330	NM_001106628	5276.63	318.5	4.509293e+002	4.525292e+001	440	42	8.374939e+000	0	0	0	0	0	0	377.93	1	1	49.8279	41.7037
DATA	1683	20	68	0	0	A_64_P039452	NM_001109063	5302.13	318.701	2.164782e+002	2.198239e+001	243	38	6.463757e+000	0	0	0	0	0	0	180.541	1	1	45.835	39.6389
DATA	1684	20	69	0	0	A_44_P516885	ENSRNOT00000005601	5327.5	318.648	2.295681e+004	2.295684e+003	18700	42	8.106170e+000	0	0	0	0	0	0	19054.6	1	1	57.5363	42.72
DATA	1685	20	70	0	0	A_44_P839176	NM_001107114	5352.58	318.573	1.773137e+003	1.773556e+002	1565	35	8.308307e+000	0	0	0	0	0	0	1465.05	1	1	57.5363	37.1935
DATA	1686	20	71	0	0	A_64_P083342	AABR03026150	5378.49	318.714	1.862419e+001	4.298270e+000	78	43	7.993697e+000	0	0	0	0	0	0	15.3193	1	0	47.2035	42.6875
DATA	1687	20	72	0	0	A_42_P618185	NM_001108486	5403.44	318.973	1.414296e+003	1.414831e+002	1223	38	7.961886e+000	0	0	0	1	0	0	1158.56	1	1	48.5334	38.0345
DATA	1688	20	73	0	0	A_42_P619957	NM_053830	5428.91	318.935	1.510264e+002	1.559940e+001	185.5	43	7.771997e+000	0	0	0	0	0	0	123.225	1	1	54.4085	40.2414
DATA	1689	20	74	0	0	A_44_P375042	NM_001014243	5454.33	318.597	1.610819e+002	1.657831e+001	194	42	8.297129e+000	0	0	0	0	0	0	130.937	1	1	47.5395	40.8649
DATA	1690	20	75	0	0	A_44_P438053	NM_001004201	5479.86	318.606	7.799421e+001	8.735222e+000	126	42	1.025629e+001	0	0	0	0	0	0	63.1792	1	1	45.4864	42.4839
DATA	1691	20	76	0	0	A_43_P19181	ENSRNOT00000018440	5505.29	318.698	1.075863e+002	1.145943e+001	146.5	47.5	9.424663e+000	0	0	0	0	0	0	86.8772	1	1	44.4243	46.9583
DATA	1692	20	77	0	0	A_42_P664259	NM_024396	5530.59	318.908	2.653822e+004	2.653825e+003	21005	51	1.198340e+001	0	0	0	0	0	0	21370.2	1	1	49.1849	51.75
DATA	1693	20	78	0	0	A_44_P588645	FQ230244	5556	319	7.267467e+001	8.279567e+000	119	42	1.007723e+001	0	0	0	0	0	0	58.3779	1	1	54.9904	44.9667
DATA	1694	20	79	0	0	A_64_P030844	XM_001065657	5581.23	319.078	2.040409e+001	4.468129e+000	78	39	7.559845e+000	0	0	0	0	0	0	16.356	1	1	45.4864	39.2857
DATA	1695	20	80	0	0	A_64_P054823	A_64_P054823	5606.87	319	8.359922e+003	8.360017e+002	6740	37.5	9.681420e+000	0	0	0	0	0	0	6689.73	1	1	48.5334	39.8333
DATA	1696	20	81	0	0	A_42_P516860	XM_001059330	5632.34	319.147	6.098116e+001	7.285833e+000	111	40	6.006279e+000	0	0	0	0	0	0	48.7358	1	1	46.1809	40.3462
DATA	1697	20	82	0	0	A_64_P085772	NM_001191606	5657.59	318.825	7.572074e+001	8.559220e+000	122.5	37	8.019144e+000	0	0	0	0	0	0	60.463	1	1	44.4243	37.84
DATA	1698	20	83	66	1	DarkCorner	DarkCorner	5682.91	319.065	4.006733e+000	3.991868e+000	56.5	37	6.826262e+000	0	0	0	0	0	0	-3.58166	0	0	54.4085	36.7419
DATA	1699	20	84	66	1	DarkCorner	DarkCorner	5708.65	318.983	4.006234e+000	3.991371e+000	57	37	6.974792e+000	0	0	0	0	0	0	-2.69403	0	0	44.0646	37.0909
DATA	1700	20	85	66	1	DarkCorner	DarkCorner	5733.86	319.031	4.003596e+000	3.988888e+000	60	34	7.715189e+000	0	0	0	0	0	0	0.272132	0	0	45.835	34.6276
DATA	1701	21	1	66	1	DarkCorner	DarkCorner	3588	324.545	3.463004e+000	3.450156e+000	60	34	7.664650e+000	0	0	0	0	0	0	-0.996889	0	0	55.8519	35.0967
DATA	1702	21	2	66	1	DarkCorner	DarkCorner	3613.42	324.573	3.449891e+000	3.442571e+000	63	38.5	6.729368e+000	0	0	0	0	0	0	1.79996	0	0	57.5363	38.3929
DATA	1703	21	3	66	1	DarkCorner	DarkCorner	3638.58	324.573	3.437097e+000	3.424345e+000	56	42	9.881057e+000	0	0	0	0	0	0	-5.24602	0	0	57.5363	40.2
DATA	1704	21	4	0	0	A_44_P277669	NM_001163736	3664.06	324.667	3.311651e+002	3.329178e+001	372.5	45	5.713046e+000	0	0	0	0	0	0	309.301	1	1	49.8279	43.75
DATA	1705	21	5	0	0	A_42_P788480	NM_019194	3689.19	324.392	5.313941e+003	5.314049e+002	4883.5	41	9.031977e+000	0	0	0	0	0	0	4980.9	1	1	49.1849	41.6875
DATA	1706	21	6	0	0	A_42_P558354	NM_001007686	3714.56	324.74	1.598398e+003	1.598757e+002	1569	42.5	9.957150e+000	0	0	0	0	0	0	1503.57	1	1	49.5074	42.6
DATA	1707	21	7	0	0	A_44_P714409	NM_001047907	3739.69	324.766	1.962864e+003	1.963154e+002	1804.5	42	9.775686e+000	0	0	0	0	0	0	1852.76	1	1	49.8279	41.2759
DATA	1708	21	8	0	0	A_42_P604331	NM_001108533	3765.58	324.573	4.693001e+004	4.693002e+003	44051	41	8.635945e+000	0	0	0	0	0	0	44449.2	1	1	57.5363	41.7273
DATA	1709	21	9	0	0	A_64_P139472	NM_173119	3790.93	324.417	1.937328e+003	1.937618e+002	1901.5	43.5	7.694717e+000	0	0	0	0	0	0	1840.87	1	1	48.2044	42.7813
DATA	1710	21	10	0	0	A_42_P711589	NM_022948	3816.06	324.386	2.345872e+003	2.346110e+002	2273.5	38	6.483707e+000	0	0	0	0	0	0	2235.97	1	1	47.2035	37.75
DATA	1711	21	11	0	0	A_42_P813567	NM_031841	3841.91	324.614	5.914236e+004	5.914237e+003	56405	40	7.315619e+000	0	0	0	0	0	0	56543.8	1	1	57.259	40.4194
DATA	1712	21	12	0	0	A_42_P647505	TC640289	3866.88	324.527	1.558070e+003	1.558425e+002	1543.5	38.5	9.289641e+000	0	0	0	0	0	0	1493.78	1	1	48.8603	40.6
DATA	1713	21	13	0	0	A_64_P094313	NM_032073	3892.57	324.608	4.323987e+002	4.336671e+001	481	39.5	7.289104e+000	0	0	0	0	0	0	415.69	1	1	49.1849	39.2
DATA	1714	21	14	0	0	A_42_P577421	NM_001106819	3917.8	324.6	3.957743e+002	3.971528e+001	451.5	40	5.978245e+000	0	0	0	1	0	0	381.44	1	1	49.1849	39.9643
DATA	1715	21	15	0	0	A_42_P477311	NM_001013170	3943.36	324.907	5.064100e+003	5.064207e+002	4959	43	9.382801e+000	0	0	0	0	0	0	4892.35	1	1	49.1849	43.5862
DATA	1716	21	16	0	0	A_42_P630249	NM_031824	3968.44	325.027	1.459767e+003	1.460138e+002	1453	42.5	9.310914e+000	0	0	0	0	0	0	1413.31	1	1	48.5334	41.2143
DATA	1717	21	17	0	0	A_42_P618256	NM_001024759	3994	324.797	3.118678e+002	3.135927e+001	370.5	39	9.015434e+000	0	0	0	0	0	0	302.552	1	1	46.8651	39.8537
DATA	1718	21	18	0	0	A_64_P101584	A_64_P101584	4019.22	325.096	2.783352e+002	2.802595e+001	332	41	9.025171e+000	0	0	0	0	0	0	270.51	1	1	47.8731	40.75
DATA	1719	21	19	0	0	A_64_P045461	NM_001106750	4044.74	324.726	8.418629e+001	9.032588e+000	145	43	5.816758e+000	0	0	0	0	0	0	81.9519	1	1	47.5395	43.1875
DATA	1720	21	20	0	0	A_64_P056485	ENSRNOT00000033663	4070.17	325	1.047900e+003	1.048410e+002	1076	42	8.438583e+000	0	0	0	0	0	0	1021.54	1	1	46.8651	43.375
DATA	1721	21	21	0	0	A_64_P013077	A_64_P013077	4095.11	324.917	1.036231e+002	1.086443e+001	164	39	9.368329e+000	0	0	0	0	0	0	101.137	1	1	46.8651	39.9677
DATA	1722	21	22	0	0	A_44_P348952	NM_001000368	4121.17	325.058	3.273524e+000	3.266473e+000	66	38	7.228154e+000	0	0	0	0	0	0	1.78153	0	0	46.8651	38.3939
DATA	1723	21	23	0	0	A_64_P147609	NM_001106295	4146.28	325.054	2.051867e+003	2.052125e+002	2089	45	1.104645e+001	0	0	0	0	0	0	2006.25	1	1	48.8603	46.1
DATA	1724	21	24	0	0	A_44_P193928	NM_183328	4172	325	4.383182e+002	4.395267e+001	505	44.5	8.501478e+000	0	0	0	0	0	0	428.817	1	1	54.9904	44.1429
DATA	1725	21	25	0	0	A_44_P441947	XM_001079870	4197.5	325	7.793981e+002	7.800779e+001	834	43	1.571007e+001	0	0	0	0	0	0	762.763	1	1	65	48.963
DATA	1726	21	26	0	0	A_42_P666259	NM_001009661	4222.44	324.972	5.610096e+003	5.610191e+002	5532	49	3.927626e+001	0	0	0	0	1	0	5490.98	1	1	48.2044	67.5217
DATA	1727	21	27	0	0	A_64_P082486	A_64_P082486	4248.42	325.427	5.689484e+002	5.698792e+001	621	57	4.999114e+001	0	0	1	0	1	0	556.811	1	1	57.5363	70.963
DATA	1728	21	28	0	0	A_64_P091940	NM_033237	4273.5	325.352	1.372947e+002	1.411050e+001	200	43	1.156907e+001	0	0	0	0	0	0	134.32	1	1	57.5363	45.48
DATA	1729	21	29	0	0	A_64_P144899	NM_001107736	4298.25	324.849	3.157259e+002	3.174032e+001	368.5	41	9.412400e+000	0	0	0	0	0	0	308.712	1	1	47.8731	43.2286
DATA	1730	21	30	0	0	A_44_P410062	XM_224553	4324.42	325.427	2.590998e+002	2.611444e+001	313.5	49	1.418593e+001	0	0	0	0	0	0	253.14	1	1	57.5363	50.1765
DATA	1731	21	31	0	0	A_42_P489764	NM_001004099	4349.56	325.028	3.270344e+003	3.270507e+002	3272	56	3.341724e+001	0	0	0	0	1	0	3191.84	1	1	48.2044	68.4074
DATA	1732	21	32	0	0	A_42_P640277	NM_001003401	4375.42	325.427	1.935145e+004	1.935147e+003	18802	46	1.613225e+001	0	0	0	0	0	0	18862.9	1	1	57.5363	48.129
DATA	1733	21	33	0	0	A_44_P212850	NM_019305	4400.58	325.427	5.293533e+001	6.224059e+000	110	52	1.229276e+001	0	0	0	1	1	0	51.523	1	1	57.5363	53.6129
DATA	1734	21	34	0	0	A_64_P125506	NM_021677	4426	325.455	1.792334e+002	1.822088e+001	238.5	46.5	1.607699e+001	0	0	0	0	0	0	174.153	1	1	65	49.8929
DATA	1735	21	35	0	0	A_42_P802358	NM_001024341	4451.09	324.672	6.744566e+003	6.744646e+002	6565	44.5	8.265219e+000	0	0	0	0	0	0	6540.69	1	1	45.1352	44.9231
DATA	1736	21	36	0	0	A_44_P552852	XM_346367	4476.58	325.427	1.252746e+001	3.523031e+000	74	46	1.000138e+001	0	0	0	0	0	0	12.1228	1	0	57.5363	46.2
DATA	1738	21	38	0	0	A_64_P141187	NM_001108899	4527.5	325.5	1.715912e+001	3.727648e+000	79.5	43	6.790133e+000	0	0	0	0	0	0	16.5222	1	1	57.5363	41.9655
DATA	1739	21	39	0	0	A_44_P274823	NM_001105831	4552.57	325.392	1.323352e+003	1.323768e+002	1338	43	1.116151e+001	0	0	0	0	0	0	1270.7	1	1	49.1849	43.2
DATA	1740	21	40	0	0	A_42_P804913	ENSRNOT00000022886	4578.31	325.457	3.972390e+001	5.182593e+000	104	37	1.123608e+001	0	0	0	0	0	0	38.0272	1	1	47.5395	38.871
DATA	1741	21	41	0	0	A_64_P113970	NM_212501	4603.5	325	1.315682e+003	1.316106e+002	1320	38	9.631099e+000	0	0	0	0	0	0	1255.45	1	1	48.5334	39.125
DATA	1742	21	42	1028	1	(+)E1A_r60_3	E1A_r60_3	4629.11	325.5	1.688416e+001	3.752079e+000	79.5	43	1.053303e+001	0	0	0	0	0	0	16.0562	1	1	56.9804	43.2821
DATA	1743	21	43	0	0	A_42_P661992	TC596141	4654.5	325.5	2.488141e+002	2.510763e+001	299	39	7.025577e+000	0	0	0	0	0	0	235.76	1	1	65	38.8889
DATA	1744	21	44	0	0	A_42_P577431	NM_001109422	4679.67	325.5	7.646546e+001	8.358443e+000	136	39	1.020525e+001	0	0	0	0	0	0	72.1821	1	1	65	40.7297
DATA	1745	21	45	0	0	A_44_P524785	NM_001000184	4705.33	325.5	5.501296e+000	3.433414e+000	68	44	9.276345e+000	0	0	0	0	0	0	5.17234	1	0	57.5363	42.1333
DATA	1746	21	46	0	0	A_64_P027634	NM_001000223	4730.58	325.573	3.541348e+001	4.911383e+000	96	37	1.184308e+001	0	0	0	0	0	0	33.1593	1	1	57.5363	39.4828
DATA	1747	21	47	0	0	A_42_P492976	NM_001126099	4756.09	325.447	2.528865e+002	2.551856e+001	295	39	9.039323e+000	0	0	0	0	0	0	235.767	1	1	49.1849	41.069
DATA	1748	21	48	0	0	A_64_P157479	AABR03127998	4781.18	325.379	3.190084e+003	3.190269e+002	3119	42.5	1.198279e+001	0	0	0	0	0	0	2961.05	1	1	45.4864	44.4412
DATA	1749	21	49	0	0	A_44_P391706	NM_001007796	4806.47	324.986	1.208475e+002	1.256721e+001	172	41	1.000786e+001	0	0	0	0	0	0	111.656	1	1	48.2044	41.2895
DATA	1750	21	50	0	0	A_44_P184685	NM_001007735	4832.42	325.573	8.138227e+001	8.845291e+000	136	36.5	7.276839e+000	0	0	0	0	0	0	74.832	1	1	57.5363	37.7143
DATA	1751	21	51	0	0	A_44_P475275	NM_001000893	4857.58	325.573	4.802577e+001	5.932069e+000	107.5	38.5	6.140501e+000	0	0	0	0	0	0	43.9481	1	1	65	39.1333
DATA	1752	21	52	0	0	A_44_P270056	NM_001007800	4882.81	325.353	1.555241e+002	1.594123e+001	200	42	6.119124e+000	0	0	0	0	0	0	141.615	1	1	46.8651	41.0667
DATA	1753	21	53	0	0	A_64_P059351	NM_001145175	4908.42	325.573	7.815624e+001	8.570603e+000	133	44	9.010269e+000	0	0	0	0	0	0	70.8039	1	1	57.5363	43.5806
DATA	1754	21	54	0	0	A_42_P573441	NM_001105742	4933.57	325.608	3.985477e+003	3.985634e+002	3660	39	9.717338e+000	0	0	0	0	0	0	3592.11	1	1	49.1849	40.48
DATA	1755	21	55	0	0	A_42_P485589	NM_017246	4958.9	325.435	9.969954e+001	1.058445e+001	153.5	38	1.242569e+001	0	0	0	0	0	0	89.3887	1	1	47.2035	40.7419
DATA	1756	21	56	0	0	A_44_P149540	XM_223051	4984.25	325.644	8.606164e+003	8.606238e+002	7611.5	39	9.172603e+000	0	0	0	0	0	0	7675.35	1	1	48.5334	38.5946
DATA	1757	21	57	0	0	A_44_P323236	NM_001000513	5009.83	325.477	1.593945e+001	3.930021e+000	76.5	37.5	9.466859e+000	0	0	0	0	0	0	14.1385	1	0	45.1352	38.0833
DATA	1759	21	59	0	0	A_64_P100447	NM_001173469	5060.58	325.573	6.002155e+000	3.680724e+000	68.5	42	7.821551e+000	0	0	0	0	0	0	5.26656	1	0	57.5363	42.52
DATA	1760	21	60	0	0	A_64_P150008	A_64_P150008	5086.11	325.846	6.682404e+001	7.614919e+000	122	39	7.915969e+000	0	0	0	0	0	0	58.3147	1	1	45.835	40.6552
DATA	1761	21	61	0	0	A_42_P481696	NM_022508	5111.21	325.806	9.871294e+002	9.878118e+001	916	40	7.251101e+000	0	0	0	0	0	0	856.793	1	1	47.5395	39.5385
DATA	1762	21	62	0	0	A_64_P033755	AABR03073220	5137.1	326.143	5.554910e+001	6.669615e+000	113	38	9.141340e+000	0	0	0	0	0	0	47.9492	1	1	45.4864	38.2564
DATA	1763	21	63	0	0	A_64_P115980	NM_001109458	5162.35	325.88	1.805218e+002	1.842976e+001	217	39.5	9.003317e+000	0	0	0	0	0	0	154.986	1	1	48.8603	40.0294
DATA	1764	21	64	0	0	A_64_P001426	NM_001126301	5187.46	325.916	7.848905e+001	8.690602e+000	130	40	1.204326e+001	0	0	0	0	0	0	67.0302	1	1	47.8731	40.96
DATA	1765	21	65	0	0	A_64_P012987	NM_001108668	5212.92	325.576	6.045636e+002	6.057262e+001	577	41	8.520687e+000	0	0	0	0	0	0	513.557	1	1	45.1352	41.1892
DATA	1767	21	67	0	0	A_42_P668289	TC585832	5263.73	325.781	1.519040e+003	1.519512e+002	1299.5	43	1.429597e+001	0	0	0	0	0	0	1277.16	1	1	48.2044	47.4857
DATA	1768	21	68	0	0	A_64_P052690	ENSRNOT00000036634	5288.79	325.806	4.087731e+002	4.105435e+001	400.5	40	6.998177e+000	0	0	0	0	0	0	341.996	1	1	47.5395	40.4324
DATA	1769	21	69	0	0	A_42_P593020	NM_013413	5314.5	326	2.606457e+001	4.630471e+000	85	38	5.975673e+000	0	0	0	0	0	0	21.7004	1	1	54.1152	38.9688
DATA	1770	21	70	0	0	A_64_P037303	NM_001127530	5340.09	326.065	4.314074e+002	4.331178e+001	411	37.5	9.101137e+000	0	0	0	0	0	0	357.484	1	1	54.4085	39.3571
DATA	1771	21	71	0	0	A_44_P684180	NM_001037363	5365.38	326	4.919410e+003	4.919562e+002	4052	40	8.853487e+000	0	0	0	0	0	0	4058.19	1	1	48.5334	39.2069
DATA	1772	21	72	0	0	A_64_P104743	NM_133518	5390.53	326	1.344687e+002	1.399521e+001	173	41.5	8.988115e+000	0	0	0	0	0	0	110.456	1	1	48.5334	39.2
DATA	1773	21	73	0	0	A_44_P941132	NM_001108128	5416.07	325.567	3.316860e+003	3.317089e+002	2661	42.5	9.251852e+000	0	0	0	0	0	0	2713.26	1	1	45.835	40.625
DATA	1774	21	74	0	0	A_44_P187080	NM_001110823	5441.63	325.822	1.252427e+004	1.252433e+003	9778	43	6.112432e+000	0	0	0	0	0	0	10205.8	1	1	48.2044	42.8519
DATA	1775	21	75	0	0	A_42_P574960	ENSRNOT00000068719	5467	326.455	3.567060e+002	3.588578e+001	347	40	1.062339e+001	0	0	0	0	0	0	289.654	1	1	55.8519	41.1471
DATA	1776	21	76	0	0	A_64_P094850	A_64_P094850	5492.71	326	4.586460e+001	6.044648e+000	98	41	1.078553e+001	0	0	0	0	0	0	37.1178	1	1	46.1809	41.5
DATA	1777	21	77	0	0	A_43_P13418	NM_172042	5517.73	325.643	3.904338e+003	3.904538e+002	3238	48	1.231334e+001	0	0	0	0	0	0	3150.38	1	1	46.8651	47.7586
DATA	1778	21	78	66	-1	(-)3xSLv1	NegativeControl	5543.42	326.427	3.974019e+000	3.959276e+000	58	50	1.296595e+001	0	0	0	0	0	0	-2.78443	0	0	57.5363	49.4828
DATA	1779	21	79	0	0	A_44_P321594	ENSRNOT00000006966	5568.58	326.427	4.227287e+001	5.798024e+000	93	41	6.570548e+000	0	0	0	0	0	0	33.9439	1	1	65	40.2917
DATA	1780	21	80	0	0	A_44_P792531	NM_001025700	5594	326.455	1.029501e+002	1.103605e+001	141	35	7.052725e+000	0	0	0	0	0	0	82.5084	1	1	55.8519	35.5313
DATA	1781	21	81	0	0	A_43_P14795	NM_001044248	5619.26	325.812	6.202946e+002	6.215715e+001	556	39	6.179579e+000	0	0	0	0	0	0	496.356	1	1	46.5243	39.4828
DATA	1782	21	82	0	0	A_42_P671502	NM_053467	5644.64	325.871	3.417206e+003	3.417439e+002	2716	40	7.289719e+000	0	0	0	0	0	0	2731.52	1	1	46.8651	39.16
DATA	1783	21	83	66	1	DarkCorner	DarkCorner	5669.77	326.453	4.003342e+000	3.988489e+000	53.5	37.5	4.656109e+000	0	0	0	0	0	0	-5.11818	0	0	49.1849	37.875
DATA	1784	21	84	66	1	DarkCorner	DarkCorner	5695.36	326.756	4.003758e+000	3.988903e+000	61	37	4.858616e+000	0	0	0	0	0	0	-0.0920362	0	0	50.1463	36.3846
DATA	1785	21	85	66	1	DarkCorner	DarkCorner	5721	326.455	4.002326e+000	3.987477e+000	60	34.5	7.812554e+000	0	0	0	0	0	0	-1.29059	0	0	55.8519	35.1905
DATA	1786	22	1	66	1	DarkCorner	DarkCorner	3600.5	332	3.455137e+000	3.442318e+000	61	35	7.624565e+000	0	0	0	0	0	0	-0.508997	0	0	54.1152	37.093
DATA	1787	22	2	66	1	DarkCorner	DarkCorner	3625.47	331.618	3.442497e+000	3.429725e+000	59.5	39	8.241124e+000	0	0	0	0	0	0	-2.40155	0	0	40.6843	38.871
DATA	1788	22	3	66	1	DarkCorner	DarkCorner	3651.5	332	3.429391e+000	3.416668e+000	50	42	8.681223e+000	0	0	0	0	0	0	-9.7581	0	0	54.1152	40.3636
DATA	1789	22	4	0	0	A_42_P704824	NM_001009640	3676.44	331.972	1.098218e+002	1.149777e+001	164	42	1.029867e+001	0	0	0	0	0	0	102.787	1	1	48.2044	41.7037
DATA	1790	22	5	0	0	A_42_P517554	NM_001107060	3701.93	331.8	7.698264e+001	8.412548e+000	133	43	8.977294e+000	0	0	0	0	0	0	72.3101	1	1	46.8651	42.8824
DATA	1791	22	6	0	0	A_42_P586883	NM_001106416	3727.34	331.829	3.519454e+001	4.879967e+000	92	42	1.087145e+001	0	0	0	0	0	0	33.1741	1	1	47.2035	41.4667
DATA	1792	22	7	0	0	A_64_P060302	BF559343	3753	332	1.949533e+002	1.978426e+001	246.5	41	8.764706e+000	0	0	0	0	0	0	184.394	1	1	65	40.4848
DATA	1793	22	8	0	0	A_64_P055418	NM_001025641	3778.03	331.803	8.942141e+000	3.475006e+000	70	43	9.622724e+000	0	0	0	0	0	0	8.48523	1	0	46.8651	42.5556
DATA	1794	22	9	0	0	A_44_P317600	NM_012612	3803.47	331.912	1.250558e+002	1.294581e+001	181	36	5.499091e+000	0	0	0	0	0	0	119.044	1	1	46.8651	37.36
DATA	1795	22	10	0	0	A_44_P433359	NM_022710	3829.42	332.427	1.870333e+002	1.899866e+001	240.5	39	6.971216e+000	0	0	0	0	0	0	178.6	1	1	57.5363	39.7419
DATA	1796	22	11	0	0	A_42_P788480	NM_019194	3854.06	331.627	5.392741e+003	5.392844e+002	5193.5	38	6.658917e+000	0	0	0	0	0	0	5164	1	1	45.835	37.8
DATA	1797	22	12	0	0	A_44_P269808	NM_001025281	3880	332.455	4.692615e+001	5.747203e+000	107	39.5	1.121338e+001	0	0	0	0	0	0	45.0638	1	1	55.8519	42.3333
DATA	1798	22	13	0	0	A_64_P108165	NM_001108889	3905.42	332.427	1.016431e+001	3.462028e+000	71	40.5	9.952875e+000	0	0	0	0	0	0	9.78638	1	0	57.5363	43.9706
DATA	1799	22	14	0	0	A_42_P581567	NM_001011899	3930.54	331.706	8.011002e+001	8.664659e+000	141	41	9.116695e+000	0	0	0	0	0	0	77.3163	1	1	46.8651	42.375
DATA	1800	22	15	0	0	A_42_P746029	NM_144748	3955.87	332.217	1.777910e+002	1.808167e+001	233	43	9.768613e+000	0	0	0	0	0	0	171.982	1	1	46.1809	43.3226
DATA	1801	22	16	0	0	A_42_P481087	XM_232226	3981.06	332.232	5.586155e+002	5.595819e+001	589.5	42.5	8.169374e+000	0	0	0	0	0	0	541.486	1	1	46.5243	40.4286
DATA	1802	22	17	0	0	A_64_P031020	ENSRNOT00000032728	4007	332.455	3.594473e+000	3.300424e+000	66	38.5	9.587458e+000	0	0	0	0	0	0	3.49106	1	0	55.8519	39.375
DATA	1803	22	18	0	0	A_44_P344228	NM_183051	4032.42	332.427	3.765857e+001	4.990842e+000	103.5	41	8.394046e+000	0	0	0	0	0	0	36.6378	1	1	57.5363	41.28
DATA	1804	22	19	0	0	A_64_P009798	NM_021742	4057.58	332.427	3.282454e+000	3.270450e+000	63.5	42.5	7.859109e+000	0	0	0	0	0	0	0.328517	0	0	57.5363	42.1471
DATA	1805	22	20	0	0	A_44_P775747	ENSRNOT00000051510	4082.87	331.957	9.785526e+003	9.785580e+002	9571	42	1.020710e+001	0	0	0	0	0	0	9546.9	1	1	46.8651	43.5806
DATA	1806	22	21	0	0	A_44_P349475	NM_031333	4108.06	332.389	7.001698e+002	7.009295e+001	758	39.5	7.879398e+000	0	0	0	0	0	0	683.851	1	1	48.2044	40.4722
DATA	1807	22	22	0	0	A_64_P114198	NM_001080153	4133.49	332.303	1.126868e+003	1.127339e+002	1142	41	7.247257e+000	0	0	0	0	0	0	1101.59	1	1	49.1849	42.0909
DATA	1808	22	23	0	0	A_42_P719060	NM_001108994	4159.42	332.427	1.333271e+003	1.333669e+002	1337	45	9.809495e+000	0	0	0	0	0	0	1304.26	1	1	57.5363	45.3214
DATA	1809	22	24	0	0	A_44_P163243	NM_175759	4184.58	332.427	3.777212e+000	3.277656e+000	65	42	6.314097e+000	0	0	0	0	0	0	3.69668	1	0	57.5363	43.1667
DATA	1810	22	25	0	0	A_44_P156864	A_44_P156864	4210.11	332.5	9.828339e+001	1.035334e+001	157	42.5	1.596919e+001	0	0	0	0	0	0	96.2104	1	1	56.9804	46.4091
DATA	1811	22	26	0	0	A_42_P758052	NM_001031645	4235.06	332.417	1.850149e+003	1.850435e+002	1864.5	49	2.859807e+001	0	0	0	0	1	0	1811.13	1	1	48.2044	58.871
DATA	1812	22	27	0	0	A_44_P280659	NM_001100971	4260.67	332.5	5.572133e+001	6.453573e+000	117	41	1.925158e+001	0	0	0	0	0	0	54.5344	1	1	57.5363	47.96
DATA	1813	22	28	0	0	A_42_P768380	NM_001100158	4285.26	331.882	3.197160e+003	3.197326e+002	3123	45.5	9.978195e+000	0	0	0	0	0	0	3127.66	1	1	48.8603	47.2333
DATA	1814	22	29	0	0	A_44_P486312	NM_144737	4311.44	332.521	2.232861e+002	2.256526e+001	281	48.5	1.227639e+001	0	0	0	0	0	0	218.285	1	1	49.1849	49
DATA	1815	22	30	0	0	A_64_P005288	XM_575125	4337.11	332.5	6.573780e+001	7.338792e+000	125	52	2.306502e+001	0	0	0	0	1	0	64.2064	1	1	56.9804	56.931
DATA	1816	22	31	0	0	A_64_P101885	ENSRNOT00000058341	4362.5	332.5	1.631572e+002	1.663942e+001	224	44	1.352493e+001	0	0	0	0	0	0	159.175	1	1	57.5363	47.069
DATA	1817	22	32	0	0	A_64_P113645	ENSRNOT00000055538	4387.67	332.5	1.259002e+001	3.504493e+000	73	53	1.168153e+001	0	0	0	0	1	0	12.2662	1	0	57.5363	54.6207
DATA	1818	22	33	0	0	A_42_P588869	NM_001008348	4412.83	332.434	1.343010e+003	1.343410e+002	1370.5	57	1.369949e+001	0	0	0	1	1	0	1306.4	1	1	49.8279	54.6957
DATA	1819	22	34	0	0	A_64_P028027	NM_001000473	4438.58	332.573	2.605051e+001	4.189982e+000	88	45.5	1.286384e+001	0	0	0	0	0	0	25.2939	1	1	65	48.0385
DATA	1820	22	35	0	0	A_42_P468805	NM_145721	4463.39	332.408	2.194134e+002	2.218638e+001	273.5	44	1.068016e+001	0	0	0	0	0	0	212.616	1	1	47.8731	45.6389
DATA	1821	22	36	0	0	A_42_P522194	NM_012914	4488.97	332.172	7.786542e+001	8.455319e+000	142	39	9.468059e+000	0	0	0	0	0	0	75.2812	1	1	45.4864	39.5405
DATA	1822	22	37	0	0	A_64_P002969	A_64_P002969	4514.85	332.574	3.692853e+000	3.324641e+000	68	41	1.041479e+001	0	0	0	0	0	0	3.56134	1	0	47.2035	39.9697
DATA	1823	22	38	0	0	A_42_P453935	NM_001198580	4539.81	332.519	1.957721e+003	1.958001e+002	1887	41	9.612768e+000	0	0	0	0	0	0	1883.01	1	1	49.8279	39.697
DATA	1824	22	39	0	0	A_42_P523551	NM_001014087	4565.5	332.648	3.334913e+000	3.322540e+000	60	39	1.087228e+001	0	0	0	0	0	0	-2.15347	0	0	65	41.1613
DATA	1825	22	40	0	0	A_64_P046076	NM_053952	4590.61	332.766	9.612603e+002	9.618379e+001	934	36	9.423147e+000	0	0	0	0	0	0	919.052	1	1	49.8279	37.0645
DATA	1826	22	41	0	0	A_42_P607770	NM_001134616	4615.93	332.493	3.952766e+003	3.952908e+002	3671	40	1.104900e+001	0	0	0	0	0	0	3766.74	1	1	48.5334	41.6585
DATA	1827	22	42	0	0	A_64_P089400	NM_022605	4641.56	332.808	8.465937e+001	9.106690e+000	141.5	38	8.641670e+000	0	0	0	0	0	0	80.3918	1	1	48.2044	39.9615
DATA	1828	22	43	0	0	A_64_P072064	FQ221714	4667.39	332.931	5.911439e+004	5.911440e+003	54934.5	41.5	8.686196e+000	0	0	0	0	0	0	55924.7	1	1	53.8203	41.75
DATA	1829	22	44	0	0	A_42_P555125	NM_012913	4692.22	332.75	4.182453e+003	4.182590e+002	3900	40	1.013068e+001	0	0	0	0	0	0	3941.81	1	1	45.1352	41.3784
DATA	1830	22	45	0	0	A_42_P768776	NM_001108443	4717.59	332.958	2.736455e+003	2.736666e+002	2622.5	44	1.232721e+001	0	0	0	1	0	0	2568.64	1	1	48.2044	45.72
DATA	1831	22	46	0	0	A_42_P593930	NM_001195606	4743.43	333.214	3.452932e+001	4.852284e+000	96	38	7.665951e+000	0	0	0	0	0	0	32.2738	1	1	47.2035	39.3043
DATA	1832	22	47	0	0	A_64_P013545	NM_001115046	4768.5	333	1.690522e+002	1.724845e+001	222	41.5	1.024689e+001	0	0	0	0	0	0	157.328	1	1	54.1152	43.4643
DATA	1833	22	48	0	0	A_42_P548520	NM_001100834	4794.39	333.069	1.798083e+003	1.798412e+002	1710	41	1.020232e+001	0	0	0	0	0	0	1665.7	1	1	53.8203	43.0286
DATA	1834	22	49	0	0	A_42_P692317	NM_001107565	4819.5	333	4.698467e+002	4.711157e+001	497.5	41	8.341422e+000	0	0	0	0	0	0	433.254	1	1	54.1152	41.2353
DATA	1835	22	50	0	0	A_64_P078303	NM_001106526	4844.91	333.065	2.573958e+001	4.322124e+000	86	38	9.514901e+000	0	0	0	0	0	0	23.6216	1	1	54.4085	41.5333
DATA	1836	22	51	0	0	A_64_P031771	A_64_P031771	4870.5	333	4.305960e+001	5.542266e+000	101.5	42	8.039218e+000	0	0	0	0	0	0	39.3214	1	1	54.1152	41.875
DATA	1837	22	52	0	0	A_44_P393929	NM_001039713	4895.5	333.03	8.908082e+001	9.573408e+000	142	41	9.321700e+000	0	0	0	0	0	0	80.9467	1	1	44.4243	44.5862
DATA	1838	22	53	0	0	A_44_P135730	XM_228802	4921.32	333	1.188016e+002	1.239205e+001	171	38	7.806601e+000	0	0	0	0	0	0	107.393	1	1	48.5334	38.4074
DATA	1839	22	54	0	0	A_43_P23215	NM_001025737	4946.35	333.027	2.045701e+002	2.076156e+001	248	40	1.070081e+001	0	0	0	0	0	0	183.981	1	1	49.1849	40.6897
DATA	1840	22	55	0	0	A_64_P118427	A_64_P118427	4971.63	333.404	5.376868e+001	6.449452e+000	112	38	8.846602e+000	0	0	0	0	0	0	48.1049	1	1	57.8122	39.0645
DATA	1841	22	56	0	0	A_64_P075560	NM_001037526	4997.42	333.427	1.892774e+001	4.050368e+000	80	38	9.053764e+000	0	0	0	0	0	0	16.8425	1	1	57.5363	38.0278
DATA	1842	22	57	0	0	A_64_P150311	NM_177935	5022.72	333.015	3.263528e+001	4.859281e+000	93	36	8.226148e+000	0	0	0	0	0	0	28.8836	1	1	46.1809	38.1481
DATA	1843	22	58	0	0	A_44_P272393	NM_001106892	5048	333.455	4.225471e+001	5.563847e+000	98	42	8.646212e+000	0	0	0	0	0	0	37.1972	1	1	55.8519	42.9032
DATA	1844	22	59	0	0	A_44_P421887	NM_001191565	5073.38	332.879	9.585654e+001	1.025334e+001	150	38.5	8.517414e+000	0	0	0	0	0	0	83.9223	1	1	45.4864	40.6176
DATA	1845	22	60	0	0	A_64_P045102	A_64_P045102	5098.93	332.883	8.684878e+002	8.692585e+001	829	43	8.208940e+000	0	0	0	0	0	0	756.204	1	1	44.4243	41.3793
DATA	1846	22	61	0	0	A_42_P818546	NM_001191600	5124.46	333.028	3.314244e+002	3.334607e+001	357	38	8.255856e+000	0	0	0	0	0	0	287.005	1	1	48.2044	37.7027
DATA	1847	22	62	0	0	A_42_P777445	ENSRNOT00000012684	5149.54	333.162	4.641057e+001	5.934959e+000	106	39	7.144345e+000	0	0	0	0	0	0	39.9766	1	1	46.8651	38.5417
DATA	1848	22	63	0	0	A_64_P111709	NM_001000554	5175	333.455	1.297958e+002	1.350190e+001	174.5	40	8.582862e+000	0	0	0	0	0	0	111.204	1	1	65	38.7
DATA	1849	22	64	0	0	A_64_P107509	NM_001191874	5200.42	333.427	4.120954e+001	5.564355e+000	97.5	41	1.195821e+001	0	0	0	0	0	0	35.1195	1	1	57.5363	41.4643
DATA	1850	22	65	0	0	A_64_P121836	ENSRNOT00000007828	5225.67	333.5	2.655812e+001	4.602100e+000	85	42.5	8.831963e+000	0	0	0	0	0	0	22.5159	1	1	57.5363	41.2353
DATA	1851	22	66	0	0	A_42_P684281	XR_008784	5251.33	333.5	1.158643e+003	1.159258e+002	1013.5	44	1.218535e+001	0	0	0	0	0	0	977.198	1	1	65	47
DATA	1852	22	67	0	0	A_64_P060804	ENSRNOT00000000462	5276.5	333.5	4.116283e+001	5.600050e+000	97	44	1.462528e+001	0	0	0	0	0	0	34.5439	1	1	57.5363	46.9677
DATA	1853	22	68	0	0	A_64_P075675	A_64_P075675	5302	333.455	2.042043e+002	2.077387e+001	232	40	5.967982e+000	0	0	0	0	0	0	170.526	1	1	55.8519	40.1714
DATA	1854	22	69	0	0	A_44_P254973	NM_198051	5327.38	333.609	3.989936e+001	5.533335e+000	96.5	41	9.832521e+000	0	0	0	0	0	0	33.1615	1	1	47.8731	42.9615
DATA	1855	22	70	0	0	A_42_P492976	NM_001126099	5352.67	333.5	2.450896e+002	2.480973e+001	254	40	7.844549e+000	0	0	0	0	0	0	202.771	1	1	57.5363	38.4138
DATA	1856	22	71	0	0	A_42_P619114	NM_001014204	5378.16	333.352	4.883210e+001	6.229854e+000	101	41	8.323972e+000	0	0	0	0	0	0	40.2219	1	1	47.5395	39.5667
DATA	1857	22	72	0	0	A_42_P541625	NM_001126090	5403.44	333.466	1.075182e+004	1.075189e+003	8712	40.5	8.679067e+000	0	0	0	0	0	0	8819.27	1	1	49.1849	38.3529
DATA	1858	22	73	0	0	A_42_P469136	NM_001044288	5428.82	333.055	5.434279e+002	5.448256e+001	509	41	6.957615e+000	0	0	0	0	0	0	443.974	1	1	46.8651	40.6216
DATA	1859	22	74	0	0	A_64_P101480	ENSRNOT00000034261	5454.42	333.573	4.141268e+001	5.698601e+000	96	41	1.009219e+001	0	0	0	0	0	0	33.7092	1	1	57.5363	41.931
DATA	1860	22	75	0	0	A_64_P078554	ENSRNOT00000020079	5480.01	333.62	2.363284e+002	2.395707e+001	255.5	44.5	1.102715e+001	0	0	0	0	0	0	191.705	1	1	47.8731	43.0882
DATA	1861	22	76	0	0	A_44_P131067	ENSRNOT00000045483	5505.33	333.5	8.534840e+000	4.031805e+000	69	38	1.095404e+001	0	0	0	0	0	0	6.90164	1	0	57.5363	41.8108
DATA	1862	22	77	0	0	A_64_P055699	ENSRNOT00000010871	5530.27	333.493	4.415684e+002	4.433327e+001	421.5	50.5	1.523064e+001	0	0	0	0	0	0	356.086	1	1	48.8603	50.4
DATA	1863	22	78	0	0	A_64_P117203	NM_001106002	5555.91	333.538	6.085610e+003	6.085739e+002	4810	47	9.677567e+000	0	0	0	0	0	0	4895.31	1	1	50.1463	47.697
DATA	1864	22	79	0	0	A_44_P357870	NM_031559	5581.08	333.68	2.399967e+002	2.432570e+001	260	36	5.399779e+000	0	0	0	0	0	0	192.656	1	1	49.1849	36.875
DATA	1865	22	80	0	0	A_42_P732101	NM_022624	5606.69	333.468	3.563779e+003	3.564001e+002	2814	39	9.116460e+000	0	0	0	0	0	0	2855.83	1	1	49.8279	39.8788
DATA	1866	22	81	0	0	A_64_P155054	XM_001062835	5632	333.545	5.296584e+001	6.626095e+000	105.5	40	5.486212e+000	0	0	0	0	0	0	42.39	1	1	55.8519	39.2069
DATA	1867	22	82	0	0	A_44_P534154	NM_001108852	5657.5	333.648	7.563940e+001	8.549331e+000	119	38	7.577029e+000	0	0	0	0	0	0	60.4857	1	1	57.5363	38.6786
DATA	1868	22	83	66	1	DarkCorner	DarkCorner	5682.86	333.639	4.001031e+000	3.986187e+000	55.5	35.5	5.734645e+000	0	0	0	0	0	0	-3.4761	0	0	48.2044	35.3846
DATA	1869	22	84	66	1	DarkCorner	DarkCorner	5708.42	333.573	4.000547e+000	3.985704e+000	56	37.5	5.584043e+000	0	0	0	0	0	0	-2.65283	0	0	65	36.6923
DATA	1870	22	85	66	1	DarkCorner	DarkCorner	5733.58	333.573	3.997968e+000	3.983135e+000	58	33	7.868543e+000	0	0	0	0	0	0	-1.01176	0	0	57.5363	33.7574
DATA	1871	23	1	66	1	DarkCorner	DarkCorner	3588	339.455	3.668490e+000	3.466697e+000	64	35	8.081475e+000	0	0	0	0	0	0	3.39092	1	0	65	35.0028
DATA	1872	23	2	66	1	DarkCorner	DarkCorner	3613.31	339.148	3.447260e+000	3.435543e+000	62	39	6.721154e+000	0	0	0	0	0	0	0.796415	0	0	50.4627	38.913
DATA	1873	23	3	66	1	DarkCorner	DarkCorner	3638.58	339.427	3.434528e+000	3.421786e+000	61	42	8.457675e+000	0	0	0	0	0	0	-0.384857	0	0	57.5363	40.375
DATA	1874	23	4	0	0	A_44_P246268	NM_001106862	3664.42	339.427	1.545401e+001	3.743018e+000	76	44	1.022660e+001	0	0	0	0	0	0	14.4445	1	0	65	43.4
DATA	1875	23	5	0	0	A_64_P028396	ENSRNOT00000051835	3689.58	339.427	3.353040e+001	4.773094e+000	94	40.5	8.724850e+000	0	0	0	0	0	0	31.4517	1	1	65	40.6389
DATA	1876	23	6	0	0	A_64_P020451	XM_219275	3714.89	339.5	2.359650e+001	4.126365e+000	86	43	9.442312e+000	0	0	0	0	0	0	22.2114	1	1	56.9804	43.5625
DATA	1878	23	8	0	0	A_64_P106264	ENSRNOT00000029671	3765.46	339.386	1.165555e+003	1.166040e+002	1173.5	41	7.891667e+000	0	0	0	0	0	0	1104.53	1	1	47.5395	41.8182
DATA	1879	23	9	0	0	A_44_P524805	NM_214832	3791.29	339.236	2.564680e+001	4.220183e+000	85	39	9.128319e+000	0	0	0	0	0	0	24.3836	1	1	47.8731	40.3529
DATA	1880	23	10	0	0	A_42_P764228	NM_031707	3816.21	339.125	2.049716e+003	2.049988e+002	1999.5	36	7.063575e+000	0	0	0	0	0	0	1954.68	1	1	47.5395	37.5862
DATA	1881	23	11	0	0	A_44_P533760	NM_182843	3841.65	339.12	7.314602e+002	7.322184e+001	738	39	4.777511e+000	0	0	0	0	0	0	699.622	1	1	48.8603	39.7692
DATA	1882	23	12	0	0	A_42_P524610	NM_001108992	3866.8	339.239	1.022427e+003	1.022967e+002	1041	38	9.001850e+000	0	0	0	0	0	0	980.668	1	1	46.8651	39.1136
DATA	1883	23	13	0	0	A_42_P570756	NM_134345	3892.5	339.5	7.508650e+004	7.508651e+003	72061	40	1.179320e+001	0	0	0	0	0	0	72215.5	1	1	57.5363	42.7097
DATA	1884	23	14	0	0	A_44_P362969	NM_053688	3918.11	339.5	3.566210e+001	4.861979e+000	95	40	1.026035e+001	0	0	0	0	0	0	34.3856	1	1	56.9804	42.0333
DATA	1885	23	15	0	0	A_44_P308197	NM_001012190	3943.13	339.5	1.672091e+003	1.672416e+002	1694.5	43	9.863942e+000	0	0	0	0	0	0	1615.98	1	1	49.8279	43.2121
DATA	1886	23	16	0	1	ETG05_36762	ETG05_36762	3968.67	339.5	3.762379e+001	4.997860e+000	100	43	7.805860e+000	0	0	0	0	0	0	36.4407	1	1	57.5363	41.8125
DATA	1887	23	17	0	0	A_42_P744033	NM_001100846	3994.42	339.573	1.640267e+002	1.672803e+001	219.5	42	9.136272e+000	0	0	0	0	0	0	159.19	1	1	57.5363	42.027
DATA	1888	23	18	0	0	A_42_P726363	NM_031536	4019.58	339.573	1.479754e+001	3.595925e+000	75	39	9.243459e+000	0	0	0	0	0	0	14.3869	1	0	57.5363	37.8077
DATA	1889	23	19	0	0	A_64_P010393	NM_053363	4044.63	339.37	2.165700e+003	2.165947e+002	2148	42	8.207370e+000	0	0	0	0	0	0	2108.94	1	1	48.2044	42.1333
DATA	1890	23	20	0	0	A_42_P612220	NM_001191711	4070.19	339.392	3.674379e+002	3.688879e+001	413	42.5	9.366909e+000	0	0	0	0	0	0	358.317	1	1	49.1849	44.1316
DATA	1891	23	21	0	0	A_44_P393551	NM_012567	4095.25	339.644	1.629460e+004	1.629463e+003	15930.5	41	7.329362e+000	0	0	0	0	0	0	15909.2	1	1	48.5334	41.2667
DATA	1892	23	22	0	0	A_44_P278688	NM_053682	4120.63	340	8.167245e+002	8.173750e+001	861	40	8.470028e+000	0	0	0	0	0	0	798.21	1	1	48.5334	40.2069
DATA	1893	23	23	0	0	A_44_P186989	NM_001000076	4146.58	339.573	3.269868e+000	3.258828e+000	63	44	8.787699e+000	0	0	0	0	0	0	0.82479	0	0	57.5363	43.9032
DATA	1894	23	24	0	0	A_42_P640277	NM_001003401	4171.5	339.769	2.045721e+004	2.045724e+003	19987	44	7.363671e+000	0	0	0	0	0	0	20020.5	1	1	49.8279	44.9032
DATA	1895	23	25	0	0	A_44_P398792	NM_053867	4197.25	339.373	6.510314e+003	6.510395e+002	6545	45	5.782334e+000	0	0	0	0	0	0	6373.5	1	1	46.1809	43.3462
DATA	1896	23	26	0	0	A_64_P052552	ENSRNOT00000056797	4222.58	339.573	7.949002e+001	8.589393e+000	141	39	1.367180e+001	0	0	0	0	0	0	77.8294	1	1	57.5363	43.1579
DATA	1897	23	27	0	0	A_64_P119254	NM_001013202	4248.42	339.573	3.266854e+000	3.254734e+000	58	46	3.727481e+001	0	0	0	0	1	0	-4.65551	0	0	57.5363	59.6786
DATA	1898	23	28	0	0	A_64_P159614	NM_053614	4273.37	339.63	1.427183e+003	1.427554e+002	1464	42	1.099452e+001	0	0	0	0	0	0	1396.77	1	1	48.2044	42.2903
DATA	1899	23	29	0	0	A_42_P814107	NM_001024750	4298.91	339.614	9.151900e+001	9.714388e+000	154	45	9.241548e+000	0	0	0	0	0	0	89.5183	1	1	57.259	46.5897
DATA	1900	23	30	0	0	A_64_P150751	NM_212494	4323.85	339.903	3.500528e+002	3.515676e+001	397	47	1.506055e+001	0	0	0	0	0	0	342.139	1	1	46.8651	49.5152
DATA	1902	23	32	0	0	A_44_P838888	ENSRNOT00000038829	4375.39	339.931	3.649202e+001	4.898339e+000	100	49	1.638088e+001	0	0	0	0	1	0	35.5855	1	1	53.8203	53.5556
DATA	1903	23	33	0	0	A_43_P12927	NM_053769	4400.5	340	1.425373e+002	1.462453e+001	196	52	1.834669e+001	0	0	0	0	1	0	138.795	1	1	54.1152	53.7037
DATA	1904	23	34	0	0	A_64_P140806	A_64_P140806	4425.64	339.881	1.127866e+004	1.127871e+003	10838	41	1.506511e+001	0	0	0	0	0	0	10964.1	1	1	45.835	48.0714
DATA	1905	23	35	0	0	A_42_P607026	NM_001106839	4450.93	339.8	2.767690e+003	2.767885e+002	2687.5	46	1.239341e+001	0	0	0	0	0	0	2685.35	1	1	46.8651	47.1429
DATA	1906	23	36	0	0	A_44_P272186	NM_001107950	4476.5	340	2.062415e+001	3.883985e+000	81	39.5	1.022331e+001	0	0	0	0	0	0	19.9676	1	1	54.1152	41.0333
DATA	1907	23	37	0	0	A_44_P226658	NM_017046	4502	339.929	3.582444e+001	4.870029e+000	97.5	43	1.080136e+001	0	0	0	0	0	0	34.6019	1	1	46.8651	41.5897
DATA	1908	23	38	0	0	A_64_P119279	NM_001108109	4527	340	6.787115e+003	6.787196e+002	6603	42	9.897410e+000	0	0	0	0	0	0	6538.93	1	1	46.8651	41.6111
DATA	1909	23	39	0	0	A_44_P1042876	NM_212504	4552.59	340.092	9.435262e+002	9.441090e+001	941	38.5	1.003419e+001	0	0	0	0	0	0	906.482	1	1	49.1849	40.7333
DATA	1910	23	40	0	0	A_64_P119607	ENSRNOT00000037601	4578.16	340.041	1.421492e+002	1.459899e+001	199	40.5	9.714547e+000	0	0	0	0	0	0	136.157	1	1	47.5395	40.2
DATA	1911	23	41	0	0	A_42_P784252	NM_133557	4603.2	339.681	4.839915e+003	4.840030e+002	4475	39	1.132536e+001	0	0	0	0	0	0	4621.25	1	1	46.8651	39.9714
DATA	1912	23	42	0	0	A_44_P1033194	NM_139328	4628.93	339.725	1.461216e+003	1.461599e+002	1460	43	1.005344e+001	0	0	0	0	0	0	1390.42	1	1	46.1809	43.3438
DATA	1913	23	43	0	0	A_42_P800048	NM_207610	4654	339.576	3.132124e+003	3.132305e+002	3058	38.5	7.944500e+000	0	0	0	0	0	0	2969.83	1	1	45.4864	39.1786
DATA	1914	23	44	0	0	A_43_P11525	NM_012710	4679.58	340.427	5.217546e+001	6.212971e+000	116	40	8.469049e+000	0	0	0	0	0	0	49.2867	1	1	57.5363	40.2188
DATA	1915	23	45	0	0	A_64_P019037	NM_001013886	4705.42	340.427	2.084098e+004	2.084101e+003	19533	39	1.165419e+001	0	0	0	0	0	0	19608.3	1	1	57.5363	41.8485
DATA	1916	23	46	0	0	A_64_P003378	NM_001024336	4730.56	340.208	1.949516e+002	1.978953e+001	246	38.5	1.056700e+001	0	0	0	0	0	0	182.673	1	1	49.8279	40.3077
DATA	1917	23	47	0	0	A_44_P258855	NM_053431	4755.83	340.105	2.457170e+003	2.457407e+002	2334	38	8.345803e+000	0	0	0	0	0	0	2292.63	1	1	48.5334	40.037
DATA	1918	23	48	0	1	ETG09_35454	ETG09_35454	4781.42	340.427	6.537679e+000	3.492052e+000	70.5	42	1.175757e+001	0	0	0	0	0	0	6.07283	1	0	65	44.6286
DATA	1919	23	49	0	0	A_64_P089677	NM_001105977	4806.58	340.427	8.347271e+001	9.030563e+000	139	40.5	8.842239e+000	0	0	0	0	0	0	77.187	1	1	65	41.5
DATA	1920	23	50	0	0	A_64_P013609	A_64_P013609	4831.76	339.853	3.961882e+000	3.484719e+000	69	44	9.571252e+000	0	0	0	0	0	0	3.64636	1	0	46.1809	44.0625
DATA	1921	23	51	0	0	A_44_P357470	NM_030849	4857.36	340.11	3.333620e+002	3.351724e+001	369	41	9.449372e+000	0	0	0	0	0	0	305.327	1	1	48.5334	41.1724
DATA	1922	23	52	0	0	A_44_P404064	ENSRNOT00000015387	4882.9	340.141	4.385358e+002	4.399274e+001	464	41	7.737217e+000	0	0	0	0	0	0	399.662	1	1	46.8651	41.3103
DATA	1923	23	53	0	0	A_64_P092167	A_64_P092167	4908.39	340.577	2.617502e+001	4.381735e+000	86	40	6.753944e+000	0	0	0	0	0	0	23.7347	1	1	47.8731	40.4828
DATA	1924	23	54	0	0	A_42_P463036	ENSRNOT00000038596	4933.68	340.443	1.295054e+003	1.295535e+002	1227.5	37	9.025289e+000	0	0	0	0	0	0	1168.3	1	1	50.4627	37.9259
DATA	1925	23	55	0	0	A_44_P1003794	NM_012576	4959.15	340.436	9.506791e+002	9.513420e+001	912	39	9.116923e+000	0	0	0	0	0	0	853.151	1	1	50.1463	39.4194
DATA	1926	23	56	0	0	A_64_P099006	BC105831	4984.35	340.493	9.732728e+000	3.699658e+000	72	39	8.527611e+000	0	0	0	0	0	0	8.68854	1	0	47.8731	38.3529
DATA	1927	23	57	0	0	A_42_P795467	NM_001108055	5009.86	340.127	3.107846e+002	3.128497e+001	339	36	8.284859e+000	0	0	0	1	0	0	275.948	1	1	46.8651	37.25
DATA	1928	23	58	0	0	A_42_P629321	NM_031590	5035.5	340.5	8.509835e+001	9.243165e+000	140	41.5	9.024071e+000	0	0	0	0	0	0	75.1513	1	1	57.5363	41.7857
DATA	1929	23	59	0	0	A_42_P549786	NM_022609	5060.48	340.362	2.125455e+003	2.125764e+002	1910	40.5	6.767785e+000	0	0	0	0	0	0	1867.01	1	1	47.5395	41.1071
DATA	1930	23	60	0	0	A_64_P006354	ENSRNOT00000043959	5086.33	340.5	3.182670e+001	4.840876e+000	91	39	8.406747e+000	0	0	0	0	0	0	27.8029	1	1	57.5363	39.6875
DATA	1931	23	61	0	0	A_64_P057109	A_64_P057109	5111.44	340.267	5.840136e+002	5.851639e+001	572	43	7.982860e+000	0	0	0	0	0	0	507.436	1	1	49.1849	40.7429
DATA	1932	23	62	0	0	A_44_P101361	NM_032070	5136.89	340.5	1.937217e+001	4.165082e+000	82	40	8.054059e+000	0	0	0	0	0	0	16.7412	1	1	65	39.5135
DATA	1933	23	63	0	0	A_64_P103354	ENSRNOT00000066893	5161.96	340.527	3.185276e+002	3.206772e+001	332	40.5	7.166159e+000	0	0	0	0	0	0	273.811	1	1	48.5334	41.4688
DATA	1934	23	64	0	0	A_42_P746868	NM_001127580	5187.39	340.5	1.077778e+004	1.077784e+003	9078	40.5	8.070129e+000	0	0	0	0	0	0	9215.36	1	1	51.7088	38.6429
DATA	1935	23	65	0	0	A_42_P707838	NM_012979	5213.11	340.147	1.111999e+003	1.112630e+002	996.5	44	9.737854e+000	0	0	0	0	0	0	945.71	1	1	47.8731	43.3226
DATA	1936	23	66	0	0	A_42_P628098	NM_001107991	5238.5	340.284	1.089953e+003	1.090604e+002	983.5	43.5	8.658710e+000	0	0	0	0	0	0	922.18	1	1	49.1849	42.7647
DATA	1937	23	67	0	0	A_64_P028071	ENSRNOT00000042928	5263.89	340.5	2.701152e+005	2.701152e+004	226592	47	1.464565e+001	0	0	0	0	0	0	227383	1	1	56.9804	48.931
DATA	1938	23	68	0	0	A_64_P002944	A_64_P002944	5289.37	340.37	3.098670e+003	3.098904e+002	2680.5	40	6.614471e+000	0	0	0	0	0	0	2595.48	1	1	48.2044	40.4138
DATA	1939	23	69	0	0	A_64_P072159	XM_574060	5314.97	340.476	2.433150e+001	4.531320e+000	84	41	7.917390e+000	0	0	0	0	0	0	20.2817	1	1	44.0646	41.9333
DATA	1940	23	70	0	0	A_64_P052365	NM_001109318	5340.13	340.513	1.571445e+002	1.617690e+001	193.5	39	8.191615e+000	0	0	0	0	0	0	130.386	1	1	50.1463	38.1111
DATA	1941	23	71	0	0	A_64_P023150	ENSRNOT00000042777	5365.43	340.608	1.286048e+002	1.342655e+001	170.5	40	7.089124e+000	0	0	0	0	0	0	106.231	1	1	49.1849	39.4545
DATA	1942	23	72	0	0	A_44_P374902	NM_133429	5390.84	340.882	4.328610e+002	4.345911e+001	427	34	8.247939e+000	0	0	0	0	0	0	356.034	1	1	46.5243	36.5185
DATA	1943	23	73	0	0	A_44_P163271	NM_198733	5416.42	340.573	1.283802e+001	4.096373e+000	74	41.5	8.661903e+000	0	0	0	0	0	0	10.516	1	0	57.5363	40.3333
DATA	1944	23	74	0	0	A_42_P548520	NM_001100834	5441.63	340.63	1.793491e+003	1.793916e+002	1510	40	8.672746e+000	0	0	0	0	0	0	1463.53	1	1	48.2044	39.2963
DATA	1945	23	75	0	0	A_64_P012154	XM_225935	5467.61	340.701	1.950518e+001	4.377572e+000	77	42	9.987993e+000	0	0	0	0	0	0	15.859	1	0	46.1809	43.52
DATA	1946	23	76	0	0	A_64_P033574	NM_001000606	5492.53	340.375	3.946385e+000	3.948218e+000	65	39	1.268134e+001	0	0	0	0	0	0	2.92002	0	0	44.4243	41.6842
DATA	1947	23	77	0	0	A_64_P027764	NM_022685	5517.92	340.901	1.781483e+002	1.824602e+001	206	38	1.129561e+001	0	0	0	0	0	0	143.956	1	1	46.8651	43.1818
DATA	1948	23	78	0	0	A_42_P484738	NM_022266	5543.44	340.973	7.602861e+002	7.613134e+001	678.5	48	1.379097e+001	0	0	0	0	0	0	612.744	1	1	48.5334	47.963
DATA	1949	23	79	0	0	A_64_P036355	NM_053311	5568.44	340.973	1.222375e+004	1.222382e+003	9900	39	8.982426e+000	0	0	0	0	0	0	9829.49	1	1	48.5334	39.2727
DATA	1950	23	80	0	0	A_42_P694928	NM_001109046	5593.7	341.052	1.637585e+002	1.685021e+001	189	39	8.684045e+000	0	0	0	0	0	0	131.435	1	1	49.1849	38.9667
DATA	1951	23	81	0	0	A_42_P588738	NM_133542	5619.1	341.134	4.487392e+001	5.995412e+000	99	40	7.964417e+000	0	0	0	0	0	0	35.9627	1	1	46.1809	38.4571
DATA	1952	23	82	0	0	A_64_P141254	XM_001060542	5644.5	341	1.961891e+001	4.437525e+000	76	38	8.033666e+000	0	0	0	0	0	0	15.7059	1	0	54.1152	38.1613
DATA	1953	23	83	0	0	A_42_P546054	NM_001013873	5670.16	340.882	1.520831e+002	1.572117e+001	181	37	5.410484e+000	0	0	0	0	0	0	121.673	1	1	46.5243	36.76
DATA	1954	23	84	66	1	DarkCorner	DarkCorner	5695.35	340.712	3.998200e+000	3.983367e+000	54	36	5.493067e+000	0	0	0	0	0	0	-5.01767	0	0	45.835	36.4074
DATA	1955	23	85	66	1	DarkCorner	DarkCorner	5720.78	341.324	3.996434e+000	3.981607e+000	57	37	8.586544e+000	0	0	0	0	0	0	-3.90627	0	0	47.8731	35.4615
DATA	1956	24	1	66	1	DarkCorner	DarkCorner	3600.47	346.559	3.452298e+000	3.439489e+000	60	38.5	7.392472e+000	0	0	0	0	0	0	-0.922555	0	0	46.5243	40
DATA	1957	24	2	66	1	DarkCorner	DarkCorner	3625.37	346.24	3.439856e+000	3.427094e+000	56	39	6.826262e+000	0	0	0	0	0	0	-4.21334	0	0	49.1849	38.2581
DATA	1958	24	3	0	0	A_64_P000371	NM_017308	3651.56	346.4	8.870356e+002	8.876924e+001	887	39.5	1.010057e+001	0	0	0	0	0	0	827.862	1	1	50.7771	39.25
DATA	1959	24	4	0	0	A_42_P772356	NM_001191597	3676.57	346.608	2.522056e+003	2.522286e+002	2415	40	1.279153e+001	0	0	0	0	0	0	2362.2	1	1	49.1849	41.8333
DATA	1961	24	6	0	0	A_42_P470757	NM_001004075	3727.21	346.603	2.128739e+003	2.129007e+002	2007.5	43	8.114358e+000	0	0	0	0	0	0	2007.75	1	1	50.1463	41.697
DATA	1962	24	7	0	0	A_64_P034250	ENSRNOT00000041464	3753	346.545	3.611897e+001	4.937796e+000	95.5	37	8.174360e+000	0	0	0	0	0	0	34.1826	1	1	55.8519	38.9429
DATA	1963	24	8	0	0	A_64_P065063	NM_012954	3778.42	346.573	5.473144e+001	6.420095e+000	112.5	41	8.661656e+000	0	0	0	0	0	0	51.9665	1	1	57.5363	41.2308
DATA	1964	24	9	0	0	A_64_P088866	ENSRNOT00000049194	3803.58	346.573	3.381093e+002	3.397605e+001	393	36	1.209388e+001	0	0	0	0	0	0	322.03	1	1	57.5363	40.4762
DATA	1965	24	10	0	0	A_44_P111759	NM_001000956	3828.76	346.581	7.268292e+000	3.413773e+000	69	37.5	9.057941e+000	0	0	0	0	0	0	6.9434	1	0	48.8603	40.25
DATA	1966	24	11	0	0	A_64_P045019	ENSRNOT00000032417	3854.44	346.479	7.939933e+002	7.946895e+001	825.5	38	9.062608e+000	0	0	0	0	0	0	760.714	1	1	48.2044	38.6316
DATA	1967	24	12	0	0	A_64_P138989	XM_001053562	3879.91	346.935	5.810042e+001	6.690035e+000	116.5	39	1.098587e+001	0	0	0	0	0	0	55.8192	1	1	54.4085	42.4242
DATA	1968	24	13	0	0	A_42_P537715	NM_001025743	3904.92	346.934	1.199433e+003	1.199889e+002	1191	41.5	1.061958e+001	0	0	0	0	0	0	1155.28	1	1	47.5395	43.8462
DATA	1969	24	14	0	0	A_42_P453171	NM_001107063	3930.38	347	1.036150e+003	1.036676e+002	1066	44	1.055096e+001	0	0	0	0	0	0	1000.44	1	1	48.5334	43.7143
DATA	1971	24	16	0	0	A_64_P096157	ENSRNOT00000059486	3981.5	347	8.170831e+001	8.806748e+000	144	44	7.686067e+000	0	0	0	0	0	0	79.2371	1	1	54.1152	44.5714
DATA	1972	24	17	0	0	A_43_P10076	NM_031665	4006.5	346.792	9.143507e+003	9.143565e+002	8681	43	1.160562e+001	0	0	0	0	0	0	8883.47	1	1	47.8731	43.2381
DATA	1974	24	19	0	0	A_42_P772878	NM_001011936	4057.24	347	1.641108e+003	1.641434e+002	1635	41	7.943098e+000	0	0	0	0	0	0	1599.58	1	1	46.8651	40.9697
DATA	1976	24	21	0	0	A_44_P447394	NM_019193	4108.07	347.2	4.848178e+003	4.848288e+002	4749	41.5	9.322230e+000	0	0	0	0	0	0	4736.94	1	1	46.8651	41.3056
DATA	1977	24	22	0	0	A_42_P504250	NM_001134987	4133.57	347.103	4.511302e+002	4.523053e+001	506	44	7.774531e+000	0	0	0	1	0	0	441.173	1	1	46.5243	43.88
DATA	1978	24	23	0	0	A_42_P675802	NM_145777	4158.85	347.167	9.612569e+002	9.618082e+001	968.5	46.5	8.815086e+000	0	0	0	0	0	0	940.675	1	1	47.5395	45.8667
DATA	1979	24	24	0	0	A_64_P111843	XM_001074913	4184.29	347.241	7.677571e+002	7.684466e+001	802	43	6.334668e+000	0	0	0	0	0	0	751.665	1	1	50.1463	42.5313
DATA	1980	24	25	0	0	A_44_P118724	NM_019361	4209.74	346.778	4.226593e+003	4.226718e+002	4132.5	38	9.955401e+000	0	0	0	0	0	0	4138.94	1	1	47.2035	40.88
DATA	1981	24	26	0	0	A_43_P21749	NM_001108329	4235.02	346.938	3.758340e+001	4.971162e+000	102	43	2.338292e+001	0	0	0	0	0	0	36.8047	1	1	45.835	51.2414
DATA	1982	24	27	0	0	A_43_P11879	NM_017250	4260.58	347.427	3.499190e+001	4.778687e+000	98	41	9.244623e+000	0	0	0	0	0	0	34.2601	1	1	57.5363	41.0345
DATA	1983	24	28	0	0	A_64_P023182	NM_001000033	4286.42	347.427	9.164797e+000	3.382444e+000	71	45	7.633832e+000	0	0	0	0	0	0	8.96913	1	0	57.5363	44.8056
DATA	1985	24	30	0	0	A_44_P368461	NM_001107085	4337.33	347.056	2.568459e+001	4.151091e+000	87	45	1.270658e+001	0	0	0	0	0	0	25.0965	1	1	48.5334	47.1143
DATA	1986	24	31	0	0	A_64_P097257	A_64_P097257	4362.42	347.427	4.958535e+001	5.936754e+000	111	41.5	1.446996e+001	0	0	0	0	0	0	48.3968	1	1	65	46.75
DATA	1987	24	32	0	0	A_64_P100634	NM_001100171	4387.58	347.427	1.796159e+002	1.825665e+001	235	48.5	1.604417e+001	0	0	0	0	0	0	175.076	1	1	57.5363	50.1538
DATA	1988	24	33	0	0	A_64_P041902	NM_001025653	4413	346.774	1.581222e+003	1.581561e+002	1568	40	1.341385e+001	0	0	0	0	0	0	1538.8	1	1	45.4864	44.5625
DATA	1990	24	35	0	0	A_64_P116171	NM_001004266	4464.14	347.078	7.767595e+001	8.434384e+000	139	39.5	8.134393e+000	0	0	0	0	0	0	75.3024	1	1	48.8603	41.3438
DATA	1991	24	36	0	0	A_44_P243279	NM_001134780	4489.07	346.803	2.900760e+002	2.919404e+001	344	39	1.007672e+001	0	0	0	0	0	0	280.591	1	1	44.7812	39.0976
DATA	1992	24	37	0	0	A_64_P151468	XM_001062494	4514.67	347.5	1.873873e+001	3.796822e+000	84	43	9.576941e+000	0	0	0	0	0	0	18.0817	1	1	57.5363	42.303
DATA	1993	24	38	0	0	A_64_P075769	ENSRNOT00000043984	4540	347.5	1.974180e+003	1.974458e+002	1967.5	40.5	1.004658e+001	0	0	0	0	0	0	1899.89	1	1	47.2035	40.3421
DATA	1994	24	39	0	0	A_42_P508921	NM_031703	4565.31	347.419	3.332880e+000	3.328595e+000	66	41	1.048480e+001	0	0	0	0	0	0	2.22422	0	0	44.0646	42
DATA	1995	24	40	0	0	A_44_P503376	NM_001000274	4590.89	347.5	3.343235e+000	3.330831e+000	61.5	38	9.725485e+000	0	0	0	0	0	0	-1.78326	0	0	65	38.6333
DATA	1996	24	41	0	0	A_64_P093088	NM_001000816	4616.5	347.5	1.115235e+001	3.523050e+000	74	39	1.001800e+001	0	0	0	0	0	0	10.6335	1	0	65	41.027
DATA	1997	24	42	0	0	A_44_P489608	NM_023967	4641.45	347.323	7.734745e+001	8.430368e+000	136.5	41	1.057402e+001	0	0	0	0	0	0	73.4971	1	1	45.1352	43.68
DATA	1998	24	43	0	0	A_44_P213088	ENSRNOT00000037507	4667.33	347.5	2.487881e+001	4.185507e+000	86	44.5	1.215532e+001	0	0	0	0	0	0	23.5524	1	1	57.5363	46.2
DATA	1999	24	44	0	0	A_64_P060725	NM_001025278	4692.5	347.5	3.391274e+000	3.388043e+000	65	40	9.780164e+000	0	0	0	0	0	0	2.37223	0	0	57.5363	41.5806
DATA	2000	24	45	0	0	A_44_P384698	XM_216321	4717.75	347.431	1.411235e+003	1.411643e+002	1437	39	1.164785e+001	0	0	0	0	0	0	1325.61	1	1	45.4864	43.3793
DATA	2001	24	46	0	0	A_42_P696084	NM_031022	4743.26	347.348	1.220498e+003	1.220974e+002	1202	43	1.094092e+001	0	0	0	0	0	0	1141.63	1	1	47.2035	42
DATA	2002	24	47	0	0	A_64_P014918	NM_001108246	4768.5	347.5	8.741442e+002	8.748135e+001	873	42	1.297872e+001	0	0	0	0	0	0	814.148	1	1	49.1849	44.6333
DATA	2003	24	48	0	0	A_64_P032690	ENSRNOT00000049975	4794.11	347.5	3.514143e+004	3.514144e+003	33211	42	1.042543e+001	0	0	0	0	0	0	32581.7	1	1	56.9804	43.2414
DATA	2004	24	49	0	0	A_42_P481516	NM_134364	4819.29	347.6	3.596154e+003	3.596320e+002	3312	45	8.461925e+000	0	0	0	1	0	0	3318.96	1	1	46.8651	44.6667
DATA	2005	24	50	0	0	A_64_P166158	ENSRNOT00000013694	4844.89	347.5	7.992478e+001	8.712905e+000	137.5	44.5	9.622848e+000	0	0	0	0	0	0	73.4106	1	1	56.9804	44.5278
DATA	2006	24	51	0	0	A_64_P140338	A_64_P140338	4870.42	347.573	5.317736e+000	3.526517e+000	68	39	9.557088e+000	0	0	0	0	0	0	4.86045	1	0	57.5363	40.2
DATA	2007	24	52	0	1	ERCC-00062_278	ERCC-00062_278	4895.58	347.573	1.710165e+002	1.745683e+001	207	40	7.170077e+000	0	0	0	0	0	0	155.539	1	1	57.5363	40.08
DATA	2008	24	53	0	0	A_64_P110838	NM_001013175	4921.17	347.7	1.771083e+002	1.805752e+001	225	38	6.958745e+000	0	0	0	0	0	0	160.258	1	1	47.2035	38.7
DATA	2009	24	54	0	0	A_42_P802358	NM_001024341	4946.38	347.763	6.737043e+003	6.737136e+002	5962.5	34.5	8.651008e+000	0	0	0	0	0	0	6064.85	1	1	49.1849	36.6071
DATA	2010	24	55	0	0	A_64_P010421	A_64_P010421	4971.61	347.475	1.909903e+001	4.038320e+000	80	40	7.721636e+000	0	0	0	0	0	0	17.1037	1	1	43.7019	40.9032
DATA	2011	24	56	0	0	A_43_P13320	NM_138880	4997.56	347.818	1.166614e+001	3.762824e+000	72	35	8.033949e+000	0	0	0	0	0	0	10.391	1	0	42.2201	35.4828
DATA	2012	24	57	0	0	A_42_P800916	NM_022403	5022.49	347.524	1.604838e+002	1.644641e+001	200	37	8.184433e+000	0	0	0	1	0	0	142.19	1	1	43.7019	39.4194
DATA	2013	24	58	0	0	A_42_P554610	XM_001064863	5047.87	347.768	5.779708e+003	5.779821e+002	4938.5	39.5	8.358506e+000	0	0	0	0	0	0	5093.44	1	1	46.1809	40.2308
DATA	2014	24	59	0	0	A_42_P476353	NM_001012113	5073	347.797	4.678830e+003	4.678972e+002	4018	38.5	6.924884e+000	0	0	0	0	0	0	4101.25	1	1	46.8651	39.6667
DATA	2015	24	60	0	0	A_43_P12234	NM_022516	5098.22	347.75	1.231026e+003	1.231569e+002	1113.5	39.5	8.255285e+000	0	0	0	0	0	0	1073.26	1	1	45.1352	40.8235
DATA	2016	24	61	0	0	A_64_P048315	ENSRNOT00000044039	5124	348	1.575129e+002	1.617429e+001	203	40.5	7.376870e+000	0	0	0	0	0	0	136.577	1	1	46.8651	41.4737
DATA	2017	24	62	0	0	A_44_P477047	NM_171983	5149.5	348	3.022454e+004	3.022456e+003	25790.5	41	7.803330e+000	0	0	0	0	0	0	26065.9	1	1	54.1152	42.0667
DATA	2018	24	63	0	0	A_43_P11871	NM_017230	5175	348	3.855173e+001	5.353607e+000	96	41	8.027925e+000	0	0	0	0	0	0	33.0693	1	1	65	40.0625
DATA	2019	24	64	0	0	A_64_P060608	XM_001068783	5200.41	347.77	3.204210e+001	4.920678e+000	88	40.5	1.138034e+001	0	0	0	0	0	0	27.3398	1	1	48.2044	42.3125
DATA	2020	24	65	0	0	A_64_P115811	NM_001008516	5225.86	347.875	2.543945e+001	4.534763e+000	83	43.5	9.862212e+000	0	0	0	0	0	0	21.5931	1	1	45.4864	42.6786
DATA	2021	24	66	0	0	A_44_P131296	ENSRNOT00000039892	5251.5	348	3.063645e+001	4.860509e+000	89	46	9.961607e+000	0	0	0	0	0	0	25.8705	1	1	54.1152	47.8148
DATA	2022	24	67	0	0	A_44_P668388	NM_001109245	5276.5	348	1.922400e+002	1.959444e+001	224	46	1.163372e+001	0	0	0	0	0	0	161.535	1	1	54.1152	47.52
DATA	2023	24	68	0	0	A_64_P069729	NM_019189	5301.71	347.943	5.627567e+001	6.796297e+000	111	41	7.057993e+000	0	0	0	0	0	0	47.0582	1	1	46.8651	41.3793
DATA	2024	24	69	1028	1	(+)E1A_r60_1	E1A_r60_1	5327.39	348.27	3.842966e+000	3.828708e+000	60	41	9.790105e+000	0	0	0	0	0	0	-1.63093	0	0	47.8731	41.3846
DATA	2025	24	70	0	0	A_64_P165441	NM_001109059	5352.66	348.141	1.981877e+001	4.326782e+000	78	40	7.971470e+000	0	0	0	0	0	0	16.419	1	1	45.1352	40.4828
DATA	2026	24	71	0	0	A_44_P1034910	NM_201562	5377.92	347.778	1.301295e+003	1.301868e+002	1134	40	7.440517e+000	0	0	0	0	0	0	1073.34	1	1	45.4864	38.1935
DATA	2027	24	72	0	0	A_42_P631818	NM_030854	5403.42	347.892	4.237935e+001	5.745357e+000	97	35	7.553679e+000	0	0	0	0	0	0	34.8097	1	1	48.8603	36.4839
DATA	2028	24	73	0	0	A_64_P095620	ENSRNOT00000031258	5429.24	348.095	2.901545e+001	4.856800e+000	86	40.5	8.264045e+000	0	0	0	0	0	0	23.738	1	1	48.2044	39.3611
DATA	2029	24	74	0	0	A_42_P726573	NM_053838	5454.39	347.871	5.294257e+002	5.308669e+001	490	39	8.825877e+000	0	0	0	0	0	0	431.543	1	1	47.2035	41.0909
DATA	2030	24	75	0	0	A_64_P029142	NM_001107866	5479.15	347.933	4.682509e+001	6.108142e+000	101	40.5	1.174859e+001	0	0	0	0	0	0	38.041	1	1	44.7812	43.0294
DATA	2031	24	76	0	0	A_43_P22902	NM_001106874	5505	348.66	3.949043e+000	3.934392e+000	55	38	1.058191e+001	0	0	0	0	0	0	-6.71004	0	0	41.4593	39.9778
DATA	2032	24	77	0	0	A_42_P619008	NM_001013079	5530.44	348.208	2.488903e+003	2.489216e+002	2077	39	1.010402e+001	0	0	0	0	0	0	2009.98	1	1	49.8279	44.3448
DATA	2033	24	78	0	0	A_64_P054421	A_64_P054421	5555.89	348.5	1.331586e+001	4.173385e+000	69	48	1.360003e+001	0	0	0	0	0	0	10.7274	1	0	65	49.0667
DATA	2034	24	79	0	0	A_42_P627330	NM_001106628	5581.34	348.122	4.417806e+002	4.435552e+001	423	37.5	9.192723e+000	0	0	0	0	0	0	355.146	1	1	48.8603	37.1154
DATA	2035	24	80	0	0	A_64_P049613	A_64_P049613	5606.58	348.427	2.420157e+001	4.649762e+000	79	41	8.342146e+000	0	0	0	0	0	0	19.4233	1	1	57.5363	41.4839
DATA	2036	24	81	0	0	A_42_P708614	NM_001130505	5632.06	348.232	2.072337e+004	2.072340e+003	16628.5	39	9.537990e+000	0	0	0	1	0	0	16610.1	1	1	46.5243	38.2353
DATA	2037	24	82	0	0	A_42_P660068	NM_031350	5657.44	348.187	1.067127e+003	1.067869e+002	897	39	9.271415e+000	0	0	0	0	0	0	854.596	1	1	49.1849	38.3226
DATA	2038	24	83	66	1	DarkCorner	DarkCorner	5683.31	348.016	3.995218e+000	3.980395e+000	54	36	7.207950e+000	0	0	0	0	0	0	-4.94902	0	0	45.4864	36.2727
DATA	2039	24	84	66	1	DarkCorner	DarkCorner	5708.46	348.319	3.994575e+000	3.979755e+000	60	38.5	6.468028e+000	0	0	0	0	0	0	-1.29333	0	0	46.8651	37.6538
DATA	2040	24	85	66	1	DarkCorner	DarkCorner	5733.5	348.5	3.991952e+000	3.977158e+000	61	35	8.854455e+000	0	0	0	0	0	0	0.0917032	0	0	57.5363	35.2466
DATA	2041	25	1	66	1	DarkCorner	DarkCorner	3587.58	353.433	4.628144e+000	3.475505e+000	64	34	7.430872e+000	0	0	0	0	0	0	4.28129	1	0	45.835	34.0236
DATA	2042	25	2	66	1	DarkCorner	DarkCorner	3613.62	353.5	3.444305e+000	3.431526e+000	56	39.5	6.841053e+000	0	0	0	0	0	0	-5.06246	0	0	50.1463	39.4
DATA	2043	25	3	0	0	A_64_P106975	A_64_P106975	3638.5	354	1.604935e+002	1.640952e+001	214.5	42	9.299386e+000	0	0	0	0	0	0	149.568	1	1	54.1152	41.4167
DATA	2044	25	4	0	0	A_42_P799702	NM_145093	3664.39	353.931	1.541621e+002	1.578811e+001	208	40	1.233071e+001	0	0	0	1	0	0	144.197	1	1	53.8203	41.75
DATA	2045	25	5	0	0	A_42_P704429	NM_053428	3689	353.797	1.639004e+004	1.639008e+003	15124	39	7.710271e+000	0	0	0	0	0	0	15383.3	1	1	46.8651	41
DATA	2046	25	6	0	0	A_64_P129730	NM_001033896	3715	354	4.385214e+001	5.538384e+000	104	43	8.075436e+000	0	0	0	0	0	0	41.3057	1	1	54.9904	42.7632
DATA	2047	25	7	0	0	A_64_P156308	NM_001008284	3740.17	353.867	2.850780e+002	2.870647e+001	330	39	7.462720e+000	0	0	0	0	0	0	269.427	1	1	47.8731	39.4054
DATA	2048	25	8	0	0	A_44_P152029	A_44_P152029	3765.69	354.31	1.093179e+001	3.533644e+000	73	39	6.386408e+000	0	0	0	0	0	0	10.3661	1	0	42.2201	39.2
DATA	2049	25	9	0	0	A_42_P751152	NM_001106360	3790.84	353.897	2.293800e+004	2.293802e+003	21929.5	44	1.071082e+001	0	0	0	0	0	0	21819.3	1	1	46.5243	43.3103
DATA	2050	25	10	0	0	A_64_P010494	NM_001001421	3816.22	353.956	7.718744e+001	8.410188e+000	135	36	1.060687e+001	0	0	0	0	0	0	73.6489	1	1	46.5243	39.5455
DATA	2051	25	11	0	0	A_64_P054606	NM_001107279	3841.5	353.788	2.317935e+002	2.341729e+001	288	37	8.896919e+000	0	0	0	0	0	0	221.814	1	1	46.5243	38.5
DATA	2052	25	12	0	0	A_44_P335679	NM_001108168	3867.42	354.427	2.860642e+001	4.382561e+000	89	38	9.096166e+000	0	0	0	0	0	0	27.4538	1	1	65	40.1333
DATA	2053	25	13	0	0	A_64_P128766	NM_001034912	3892.5	354.352	1.176005e+002	1.221739e+001	175	38.5	1.258176e+001	0	0	0	0	0	0	113.158	1	1	57.5363	40.7778
DATA	2054	25	14	0	0	A_42_P595591	NM_031011	3917.48	354.147	9.748537e+003	9.748593e+002	9051	40	9.332199e+000	0	0	0	0	0	0	9403.3	1	1	49.8279	41.8571
DATA	2055	25	15	0	0	A_44_P962846	ENSRNOT00000058887	3942.87	354.042	2.832081e+002	2.851193e+001	334	44	9.551541e+000	0	0	0	0	0	0	273.816	1	1	46.8651	44.3429
DATA	2056	25	16	0	0	A_64_P111878	XR_005569	3968.36	354.13	1.388124e+003	1.388514e+002	1447	43	5.783003e+000	0	0	0	0	0	0	1345.01	1	1	46.8651	43.0357
DATA	2057	25	17	0	0	A_64_P149225	NM_001100833	3994.42	354.427	7.614648e+004	7.614648e+003	74165	47	8.859299e+000	0	0	0	0	0	0	73932.4	1	1	57.5363	45.8889
DATA	2058	25	18	0	0	A_64_P032361	ENSRNOT00000061428	4019.15	353.866	8.926225e+002	8.932236e+001	922	39	9.499417e+000	0	0	0	0	0	0	868.17	1	1	46.1809	38.8966
DATA	2059	25	19	0	0	A_64_P038843	A_64_P038843	4045	354.455	1.168240e+001	3.473122e+000	76	38	7.893920e+000	0	0	0	0	0	0	11.3811	1	0	55.8519	38.7742
DATA	2060	25	20	1028	1	(+)E1A_r60_a97	E1A_r60_a97	4070.42	354.427	3.278318e+000	3.266156e+000	61	42	8.739499e+000	0	0	0	0	0	0	-1.52125	0	0	65	43.075
DATA	2061	25	21	0	0	A_42_P586883	NM_001106416	4095.58	354.427	2.878532e+001	4.350670e+000	92	41.5	6.247707e+000	0	0	0	0	0	0	28.1159	1	1	57.5363	41.9231
DATA	2062	25	22	0	0	A_42_P626023	NM_001107265	4121.42	354.427	2.358302e+002	2.380713e+001	298	44	9.469248e+000	0	0	0	0	0	0	230.579	1	1	57.5363	42.2
DATA	2063	25	23	0	0	A_64_P304646	ENSRNOT00000046873	4146.58	354.427	3.487644e+001	4.771596e+000	97.5	43.5	8.170006e+000	0	0	0	0	0	0	34.1262	1	1	57.5363	43.6563
DATA	2064	25	24	0	0	A_42_P540711	NM_133568	4171.51	354.367	7.945256e+003	7.945323e+002	7803	46	6.858693e+000	0	0	0	0	0	0	7778.68	1	1	49.8279	44.7917
DATA	2065	25	25	0	0	A_64_P079149	XM_001063529	4197.43	354.014	6.256337e+002	6.264791e+001	670	42.5	7.698335e+000	0	0	0	0	0	0	612.729	1	1	48.5334	42.6667
DATA	2066	25	26	0	0	A_42_P507072	FQ213070	4222.48	354.151	1.857645e+003	1.857930e+002	1873	42	8.711902e+000	0	0	0	0	0	0	1819.56	1	1	47.8731	41.5217
DATA	2067	25	27	0	0	A_44_P314270	ENSRNOT00000015469	4247.93	354.268	1.227556e+002	1.269936e+001	182.5	42	8.403465e+000	0	0	0	0	0	0	120.228	1	1	47.5395	40.2414
DATA	2068	25	28	0	0	A_64_P026098	ENSRNOT00000027092	4273.5	354.5	6.084479e+001	6.900153e+000	122	42	8.284718e+000	0	0	0	0	0	0	59.5732	1	1	57.5363	42.3548
DATA	2069	25	29	0	0	A_64_P018599	XM_229548	4298.89	354.5	3.268325e+000	3.256200e+000	60	41.5	6.987744e+000	0	0	0	0	0	0	-3.09903	0	0	56.9804	41.5
DATA	2070	25	30	0	0	A_43_P15907	NM_001134567	4324.14	354.746	3.325875e+001	4.656227e+000	96	46.5	1.490245e+001	0	0	0	0	0	0	32.521	1	1	47.5395	49.0882
DATA	2071	25	31	0	0	A_64_P151804	A_64_P151804	4349.58	354.573	5.663732e+001	6.535924e+000	118	39.5	1.017642e+001	0	0	0	0	0	0	55.3252	1	1	57.5363	42.3214
DATA	2072	25	32	0	0	A_42_P642743	NM_017005	4374.69	354.611	5.136507e+003	5.136610e+002	5014	43	1.024898e+001	0	0	0	0	0	0	5011.44	1	1	48.2044	44.2083
DATA	2073	25	33	0	0	A_42_P630463	NM_022238	4400.06	353.771	1.475730e+002	1.511542e+001	211	38	8.558953e+000	0	0	0	0	0	0	143.767	1	1	46.8651	39.5455
DATA	2074	25	34	0	0	A_64_P119533	NM_001000351	4425.89	354.5	8.722297e+000	3.390381e+000	71	38.5	1.235867e+001	0	0	0	0	0	0	8.48306	1	0	56.9804	41.7667
DATA	2075	25	35	0	0	A_64_P158068	FQ219182	4451.11	354.352	1.370559e+003	1.370952e+002	1403	40	9.307560e+000	0	0	0	0	0	0	1330.45	1	1	47.8731	40.4545
DATA	2076	25	36	0	0	A_64_P000779	XM_225838	4476.42	354.667	2.889768e+001	4.378445e+000	91	43	9.413884e+000	0	0	0	0	0	0	27.993	1	1	48.5334	41.6061
DATA	2077	25	37	0	0	A_44_P630082	ENSRNOT00000020640	4502.11	354.5	1.331989e+002	1.372191e+001	194	38.5	9.526750e+000	0	0	0	0	0	0	128.723	1	1	56.9804	38.6
DATA	2078	25	38	0	0	A_42_P717654	XM_001063683	4527.14	354.716	2.236911e+003	2.237155e+002	2156.5	43	9.997823e+000	0	0	0	0	0	0	2156.33	1	1	48.5334	43.3514
DATA	2079	25	39	0	0	A_42_P792382	NM_017257	4552.88	354.69	2.596012e+003	2.596224e+002	2574.5	37	8.795771e+000	0	0	0	0	0	0	2495.49	1	1	52.0157	38.9677
DATA	2080	25	40	0	0	A_64_P075035	NM_001001014	4578.23	354.8	1.093446e+002	1.142870e+001	167	41	9.545587e+000	0	0	0	0	0	0	104.8	1	1	50.4627	41.2414
DATA	2081	25	41	0	0	A_64_P021281	NM_001039022	4603.34	354.271	2.515945e+003	2.516166e+002	2407.5	39	9.613025e+000	0	0	0	0	0	0	2403.77	1	1	47.5395	40.4444
DATA	2082	25	42	0	0	A_44_P729533	TC581820	4628.69	354.611	3.200840e+003	3.201015e+002	3100	41	8.842655e+000	0	0	0	0	0	0	3047.91	1	1	48.2044	42.4688
DATA	2083	25	43	0	0	A_42_P802358	NM_001024341	4654	354.5	6.835938e+003	6.836021e+002	6495	41.5	1.034949e+001	0	0	0	0	0	0	6486.28	1	1	48.5334	42.2813
DATA	2084	25	44	0	0	A_42_P481087	XM_232226	4679.63	354.63	5.954180e+002	5.963714e+001	621	39	1.139836e+001	0	0	0	0	0	0	562.838	1	1	48.2044	40.4516
DATA	2085	25	45	0	0	A_42_P561597	NM_001106486	4704.93	354.786	4.013376e+003	4.013519e+002	3837	39	9.808074e+000	0	0	0	0	0	0	3779.03	1	1	46.8651	41.0857
DATA	2086	25	46	0	0	A_64_P113381	A_64_P113381	4730.26	354.643	6.055044e+000	3.451377e+000	72	43	1.132960e+001	0	0	0	0	0	0	5.67824	1	0	36.9964	43.1212
DATA	2087	25	47	0	0	A_64_P088695	NM_001134414	4755.72	354.905	1.097313e+003	1.097843e+002	1052.5	41.5	7.982845e+000	0	0	0	0	0	0	1024.67	1	1	48.8603	41.125
DATA	2088	25	48	0	0	A_44_P728586	ENSRNOT00000013367	4781.37	355.043	8.307840e+002	8.314907e+001	828.5	38.5	8.552494e+000	0	0	0	0	0	0	772.35	1	1	46.8651	39.875
DATA	2089	25	49	0	0	A_42_P544898	NM_001108279	4806.5	355	3.967295e+001	5.252926e+000	101	44.5	9.272739e+000	0	0	0	0	0	0	36.7169	1	1	54.1152	43.375
DATA	2090	25	50	0	0	A_44_P432910	NM_012814	4832.5	355	8.630513e+004	8.630513e+003	77050.5	44	8.922674e+000	0	0	0	0	0	0	79492.6	1	1	54.1152	44.3243
DATA	2091	25	51	0	0	A_64_P157820	XM_001079095	4857.5	355	6.201754e+001	7.109399e+000	120	40.5	1.076247e+001	0	0	0	0	0	0	56.8525	1	1	54.1152	41.8571
DATA	2092	25	52	0	0	A_42_P601802	NM_134465	4882.73	354.775	1.618372e+003	1.618748e+002	1505.5	38	7.251844e+000	0	0	0	1	0	0	1476.33	1	1	47.2035	38.5484
DATA	2093	25	53	0	0	A_64_P039737	NM_001130508	4908.24	355	9.047573e+001	9.704788e+000	144	38	5.821303e+000	0	0	0	0	0	0	82.1204	1	1	46.8651	38.5357
DATA	2094	25	54	0	0	A_42_P648800	AA998304	4933.5	355.056	1.649169e+002	1.686494e+001	217.5	38	8.469678e+000	0	0	0	0	0	0	148.928	1	1	48.5334	39.4286
DATA	2095	25	55	0	0	A_64_P007009	ENSRNOT00000014567	4959.15	355.136	1.788873e+003	1.789225e+002	1666.5	36.5	9.652473e+000	0	0	0	0	0	0	1606.99	1	1	46.1809	39.2647
DATA	2096	25	56	0	0	A_64_P049527	TC606896	4984.38	355	2.410401e+002	2.436632e+001	278	37	6.435578e+000	0	0	0	0	0	0	215.4	1	1	48.5334	36.6667
DATA	2097	25	57	0	0	A_44_P281595	NM_001037556	5009.93	354.691	4.839186e+001	6.022408e+000	103	38	7.867796e+000	0	0	0	0	0	0	43.0123	1	1	45.835	38.9688
DATA	2098	25	58	0	0	A_44_P374638	NM_024391	5035.5	355.352	1.674901e+002	1.713240e+001	212	37	8.379397e+000	0	0	0	0	0	0	148.076	1	1	57.5363	39
DATA	2100	25	60	0	0	A_64_P046416	A_64_P046416	5086.23	354.703	4.814098e+001	6.037401e+000	104	41	8.022397e+000	0	0	0	0	0	0	42.1021	1	1	45.1352	41.5946
DATA	2101	25	61	0	0	A_44_P428560	NM_001001358	5111.33	355.139	5.705383e+001	6.779951e+000	111.5	42.5	7.363746e+000	0	0	0	0	0	0	49.6328	1	1	47.8731	42.7895
DATA	2102	25	62	0	0	A_44_P208887	NM_001105774	5136.91	355.386	5.770729e+001	6.845695e+000	111.5	40	7.631181e+000	0	0	0	0	0	0	49.9305	1	1	57.259	40.7778
DATA	2103	25	63	0	0	A_42_P533792	NM_001106575	5162.03	355.127	4.926888e+003	4.927027e+002	4182	41	7.792163e+000	0	0	0	0	0	0	4240.31	1	1	46.8651	41.697
DATA	2104	25	64	0	0	A_42_P802550	NM_017365	5187.44	355.361	2.651428e+002	2.677424e+001	289.5	42.5	1.183440e+001	0	0	0	0	0	0	226.989	1	1	48.2044	42.8571
DATA	2105	25	65	0	0	A_42_P545129	ENSRNOT00000007554	5213	354.938	6.202175e+002	6.213453e+001	587	41	9.127899e+000	0	0	0	0	0	0	528.156	1	1	46.1809	42.1875
DATA	2106	25	66	0	0	A_42_P500675	NM_013179	5238.51	355.13	3.107571e+002	3.130249e+001	326	44	9.348744e+000	0	0	0	0	0	0	263.266	1	1	47.2035	45.4483
DATA	2107	25	67	0	0	A_44_P127238	NM_001127655	5263.7	355.1	4.030292e+002	4.047981e+001	396	47	7.829333e+000	0	0	0	0	0	0	339.727	1	1	47.2035	48.4615
DATA	2108	25	68	0	0	A_64_P042142	ENSRNOT00000027371	5289.43	355.231	8.643595e+001	9.441641e+000	134	44	8.093938e+000	0	0	0	0	0	0	72.4968	1	1	45.4864	43.3871
DATA	2109	25	69	0	0	A_44_P279756	NM_022848	5314.58	355.427	5.602845e+000	3.858001e+000	67.5	41	8.833434e+000	0	0	0	0	0	0	4.67709	1	0	57.5363	41.3793
DATA	2110	25	70	0	0	A_64_P119597	NM_001106871	5340.11	355.5	8.592112e+000	3.930009e+000	68	39	8.796971e+000	0	0	0	0	0	0	7.13908	1	0	65	38.6207
DATA	2111	25	71	0	0	A_44_P790674	NM_001191933	5365.5	355.5	1.812751e+001	4.257319e+000	77	39	8.549791e+000	0	0	0	0	0	0	14.9948	1	0	65	39.0323
DATA	2112	25	72	0	0	A_44_P405618	ENSRNOT00000025426	5390.59	355.28	1.758328e+002	1.800380e+001	204	35.5	6.798326e+000	0	0	0	0	0	0	144.831	1	1	48.8603	36.7
DATA	2113	25	73	0	0	A_42_P719478	NM_001191779	5416.33	355.5	4.208322e+000	3.907043e+000	66	40	7.921968e+000	0	0	0	0	0	0	3.4522	1	0	57.5363	39.1515
DATA	2114	25	74	0	0	A_64_P061424	A_64_P061424	5441.79	355.403	3.115350e+001	4.990921e+000	88.5	39	1.063814e+001	0	0	0	0	0	0	25.4583	1	1	47.8731	41.2069
DATA	2115	25	75	0	0	A_44_P1042876	NM_212504	5467.11	355.5	9.455761e+002	9.463854e+001	792	47	1.411598e+001	0	0	0	0	0	0	769.995	1	1	56.9804	46.4783
DATA	2116	25	76	0	0	A_44_P470043	NM_001108103	5492.5	355.5	1.236837e+002	1.297646e+001	162	39	9.963518e+000	0	0	0	0	0	0	100.389	1	1	57.5363	39.1579
DATA	2117	25	77	0	0	A_64_P108484	ENSRNOT00000046584	5518.29	355.636	3.763769e+001	5.447029e+000	92.5	37	7.839838e+000	0	0	0	0	0	0	30.4579	1	1	45.835	38.9655
DATA	2118	25	78	0	0	A_42_P666065	NM_001014069	5543.27	355.5	4.256406e+002	4.274674e+001	399	49	1.301281e+001	0	0	0	0	0	0	343.552	1	1	49.1849	50
DATA	2119	25	79	0	0	A_64_P136571	NM_001134545	5568.58	355.573	4.170321e+001	5.748653e+000	95.5	40	1.730756e+001	0	0	0	0	0	0	33.5844	1	1	57.5363	46.1379
DATA	2120	25	80	0	0	A_42_P816740	NM_001108705	5594.01	355.541	1.649910e+002	1.696866e+001	193.5	40	8.187910e+000	0	0	0	0	0	0	132.618	1	1	48.5334	38.5517
DATA	2121	25	81	0	0	A_64_P018142	NM_001100716	5619.53	355.378	1.552260e+002	1.602229e+001	189	36	8.761523e+000	0	0	0	0	0	0	124.58	1	1	49.1849	36.75
DATA	2122	25	82	0	0	A_42_P779687	ENSRNOT00000034449	5644.63	355.36	7.710134e+003	7.710236e+002	6005.5	39	8.500000e+000	0	0	0	0	0	0	6181.44	1	1	48.8603	37.4
DATA	2124	25	84	66	1	DarkCorner	DarkCorner	5695.41	356.027	3.991891e+000	3.977080e+000	55.5	36	5.659705e+000	0	0	0	0	0	0	-4.70636	0	0	49.1849	37.0323
DATA	2125	25	85	66	1	DarkCorner	DarkCorner	5721.02	355.443	3.990605e+000	3.977158e+000	62	36	8.105178e+000	0	0	0	0	0	0	0.832973	0	0	43.7019	35.6098
DATA	2126	26	1	66	1	DarkCorner	DarkCorner	3600.55	361.195	3.449235e+000	3.436438e+000	56	37	6.169064e+000	0	0	0	0	0	0	-3.27058	0	0	49.8279	38.1702
DATA	2127	26	2	66	1	DarkCorner	DarkCorner	3626	361.455	6.006071e+000	3.476112e+000	68	38.5	8.767953e+000	0	0	0	0	0	0	5.58957	1	0	55.8519	39.1765
DATA	2128	26	3	0	0	A_42_P713844	NM_001106167	3651.11	361.338	3.644215e+002	3.660150e+001	398	39	9.632316e+000	0	0	0	0	0	0	340.362	1	1	47.8731	40.5714
DATA	2129	26	4	0	0	A_42_P627219	NM_001012468	3676.3	361.143	4.982671e+003	4.982787e+002	4512	40	1.249798e+001	0	0	0	0	0	0	4670.12	1	1	47.2035	42.2593
DATA	2130	26	5	0	0	A_42_P461003	NM_001044283	3701.75	361.373	6.827689e+003	6.827773e+002	6534	40	8.479253e+000	0	0	0	0	0	0	6421.94	1	1	49.1849	41.9091
DATA	2131	26	6	0	0	A_44_P1019923	NM_022522	3727.19	361.519	1.119078e+003	1.119587e+002	1106	39	7.445891e+000	0	0	0	0	0	0	1056.19	1	1	49.8279	39.9231
DATA	2132	26	7	0	0	A_42_P814056	NM_001108866	3752.74	361.5	4.549830e+003	4.549954e+002	4331.5	40	6.634982e+000	0	0	0	0	0	0	4308.56	1	1	50.4627	40.3333
DATA	2133	26	8	0	0	A_42_P795269	NM_001134730	3778.19	361.608	3.292721e+003	3.292892e+002	3186	42	8.128677e+000	0	0	0	0	0	0	3128.23	1	1	49.1849	40.6538
DATA	2134	26	9	0	0	A_42_P763522	NM_001013980	3803.57	361.389	1.326610e+003	1.327031e+002	1340.5	38.5	9.998231e+000	0	0	0	0	0	0	1264.25	1	1	48.2044	39.7308
DATA	2135	26	10	0	0	A_44_P292437	NM_153309	3828.93	361.253	1.633393e+002	1.667064e+001	221.5	36	1.046037e+001	0	0	0	0	0	0	156.127	1	1	48.8603	39.5
DATA	2136	26	11	0	0	A_64_P065313	ENSRNOT00000042070	3854.29	361.157	7.391890e+001	8.104919e+000	132	39	9.022069e+000	0	0	0	0	0	0	70.8568	1	1	47.2035	40.0909
DATA	2137	26	12	0	0	A_64_P008047	NM_001033670	3879.57	361.392	1.347586e+004	1.347590e+003	12749	38.5	1.027370e+001	0	0	0	0	0	0	12952.7	1	1	49.1849	41.625
DATA	2138	26	13	0	0	A_64_P080612	TC638889	3904.74	361.222	2.423538e+003	2.423764e+002	2402.5	39	1.093384e+001	0	0	0	0	0	0	2335.39	1	1	47.5395	40.625
DATA	2139	26	14	0	0	A_43_P17696	NM_001004257	3930.31	361.662	1.185300e+003	1.185758e+002	1207.5	44	8.995369e+000	0	0	0	0	0	0	1144.98	1	1	48.5334	44.8
DATA	2140	26	15	0	0	A_64_P019608	NM_001105713	3955.68	361.4	3.783364e+002	3.797653e+001	408	42	7.826359e+000	0	0	0	0	0	0	366.283	1	1	50.7771	41.7576
DATA	2141	26	16	0	0	A_64_P108575	ENSRNOT00000046600	3981.5	361.5	4.971921e+001	5.958763e+000	110	43	7.125318e+000	0	0	0	0	0	0	48.2366	1	1	57.5363	43.5625
DATA	2142	26	17	0	0	A_64_P136859	NM_001109642	4006.47	361.333	4.885397e+003	4.885507e+002	4786	40.5	9.986948e+000	0	0	0	0	0	0	4748.49	1	1	49.1849	43.5
DATA	2143	26	18	0	0	A_64_P021597	A_64_P021597	4032.31	361.778	3.284758e+000	3.282290e+000	65	39	7.546104e+000	0	0	0	0	0	0	2.45751	0	0	47.5395	37.4333
DATA	2144	26	19	0	0	A_64_P148032	A_64_P148032	4057.58	361.573	8.150607e+001	8.781247e+000	141.5	41	7.711414e+000	0	0	0	0	0	0	79.4782	1	1	57.5363	41.8182
DATA	2145	26	20	0	0	A_42_P743580	NM_017214	4082.75	361.447	3.607906e+003	3.608054e+002	3582.5	42	8.571395e+000	0	0	0	0	0	0	3522.67	1	1	49.5074	41.4706
DATA	2146	26	21	0	0	A_42_P693964	NM_181087	4108.05	361.816	1.881018e+003	1.881300e+002	1832	42	8.857898e+000	0	0	0	0	0	0	1838.62	1	1	48.5334	43.0645
DATA	2147	26	22	0	0	A_44_P1058389	NM_012992	4133.5	361.769	8.832462e+003	8.832522e+002	8389.5	44	8.425836e+000	0	0	0	0	0	0	8641.07	1	1	49.8279	43.4286
DATA	2148	26	23	0	0	A_44_P135224	NM_022187	4159.42	361.573	7.798211e+001	8.450177e+000	142	43	8.197561e+000	0	0	0	0	0	0	76.3445	1	1	57.5363	43
DATA	2149	26	24	0	0	A_64_P070249	ENSRNOT00000048236	4184.29	361.701	5.138479e+002	5.148767e+001	554.5	45	9.015220e+000	0	0	0	0	0	0	503.286	1	1	49.8279	45.125
DATA	2150	26	25	0	0	A_42_P806899	NM_001108829	4210.09	361.614	1.838486e+001	3.736130e+000	83	43	9.705903e+000	0	0	0	0	0	0	18.0113	1	1	57.259	44.7273
DATA	2151	26	26	0	0	A_42_P465144	NM_001107714	4235.1	361.562	2.487715e+001	4.094751e+000	88	42	8.122906e+000	0	0	0	0	0	0	24.3722	1	1	48.2044	41.4667
DATA	2152	26	27	0	0	A_43_P19712	NM_001106751	4260.63	361.596	1.035473e+001	3.413907e+000	73	41	7.538734e+000	0	0	0	0	0	0	10.1425	1	0	57.8122	38.2414
DATA	2153	26	28	0	0	A_42_P728472	NM_001007600	4286	361.797	7.567984e+003	7.568054e+002	7143	41	8.150862e+000	0	0	0	0	0	0	7409.73	1	1	46.8651	41.6452
DATA	2154	26	29	66	-1	(-)3xSLv1	NegativeControl	4311.5	362	3.268701e+000	3.256574e+000	61	41	8.190442e+000	0	0	0	0	0	0	-1.97237	0	0	54.1152	42.2
DATA	2155	26	30	0	0	A_42_P629394	NM_031683	4336.56	362.028	1.325398e+003	1.325798e+002	1326	40	1.040048e+001	0	0	0	0	0	0	1295.71	1	1	48.2044	42.6452
DATA	2156	26	31	0	0	A_64_P041977	A_64_P041977	4362.25	361.931	6.151403e+001	6.963284e+000	126	41	8.954300e+000	0	0	0	0	0	0	60.0689	1	1	47.5395	42.2222
DATA	2157	26	32	0	0	A_44_P126406	XM_228958	4387.7	361.971	3.167743e+003	3.167912e+002	3199	39	8.323024e+000	0	0	0	0	0	0	3089.2	1	1	46.1809	41
DATA	2158	26	33	0	0	A_64_P021878	NM_001167664	4413.06	361.824	5.469091e+001	6.373413e+000	117.5	38	7.288671e+000	0	0	0	0	0	0	53.2516	1	1	46.5243	37.4839
DATA	2159	26	34	0	0	A_64_P058719	NM_001014175	4438.13	361.754	3.088139e+003	3.088313e+002	3042	39	9.300538e+000	0	0	0	0	0	0	3001.58	1	1	46.1809	39
DATA	2160	26	35	0	0	A_42_P495579	NM_001107564	4463.69	361.716	1.619051e+002	1.652039e+001	220	38	8.398479e+000	0	0	0	0	0	0	157.05	1	1	47.5395	40.2286
DATA	2161	26	36	0	0	A_64_P054979	NM_001109615	4489.06	361.875	4.369442e+001	5.470874e+000	103.5	39	8.135674e+000	0	0	0	0	0	0	42.2905	1	1	46.8651	39.2432
DATA	2162	26	37	0	0	A_44_P713838	ENSRNOT00000032874	4514.28	361.917	6.162835e+001	6.990814e+000	122	40	8.694583e+000	0	0	0	0	0	0	59.5043	1	1	47.8731	40.7813
DATA	2163	26	38	0	0	A_64_P158913	NM_001108101	4540.39	362.069	3.321445e+000	3.309122e+000	65	39	8.564979e+000	0	0	0	0	0	0	-0.172919	0	0	53.8203	39.4054
DATA	2164	26	39	0	0	A_43_P13018	NM_054004	4565.32	362	6.741373e+003	6.741454e+002	6372	36	7.831560e+000	0	0	0	0	0	0	6473.16	1	1	49.1849	38
DATA	2165	26	40	0	0	A_64_P114383	A_64_P114383	4590.6	362.147	8.863890e+003	8.863952e+002	8429	39	8.393129e+000	0	0	0	0	0	0	8485.42	1	1	48.8603	41.2692
DATA	2166	26	41	0	0	A_43_P16629	XM_001080634	4615.83	361.677	3.536149e+003	3.536307e+002	3471	39.5	6.769759e+000	0	0	0	0	0	0	3374.15	1	1	45.4864	39.9063
DATA	2167	26	42	0	0	A_42_P810313	NM_001108677	4641.62	361.812	6.743119e+001	7.529902e+000	125	38	7.019734e+000	0	0	0	0	0	0	64.1174	1	1	46.8651	40.12
DATA	2168	26	43	0	0	A_42_P537516	NM_001106023	4666.64	361.719	5.347042e+003	5.347148e+002	5093	42	1.265223e+001	0	0	0	0	0	0	5066.07	1	1	44.7812	43.2571
DATA	2169	26	44	0	0	A_64_P006964	A_64_P006964	4692.09	361.828	1.028212e+002	1.082217e+001	163	39	1.136357e+001	0	0	0	0	0	0	97.047	1	1	43.3362	42.4545
DATA	2170	26	45	0	0	A_42_P829251	NM_133381	4718	362.455	7.889710e+000	3.480258e+000	70	43.5	1.377592e+001	0	0	0	0	0	0	7.41664	1	0	65	46.8158
DATA	2171	26	46	0	0	A_42_P687443	NM_020100	4743.42	362.427	7.790815e+001	8.501915e+000	137.5	43	8.272574e+000	0	0	0	0	0	0	72.9325	1	1	57.5363	41.875
DATA	2172	26	47	0	0	A_44_P196146	NM_031349	4768.58	362.427	1.000269e+002	1.057067e+001	155	41	8.694316e+000	0	0	0	0	0	0	93.2393	1	1	57.5363	40.6552
DATA	2173	26	48	0	0	A_64_P050137	ENSRNOT00000058586	4794.21	362.288	1.267790e+002	1.313469e+001	181	42	1.038901e+001	0	0	0	0	0	0	117.644	1	1	48.2044	42.9375
DATA	2174	26	49	0	0	A_44_P637827	NM_001108797	4818.93	361.582	2.341965e+003	2.342219e+002	2105.5	44	9.239039e+000	0	0	0	0	0	0	2163.41	1	1	45.835	43.2121
DATA	2175	26	50	0	0	A_64_P070073	NM_001109590	4844.89	362.5	8.255061e+001	8.953131e+000	142	41	1.068446e+001	0	0	0	0	0	0	75.8934	1	1	56.9804	42.8108
DATA	2176	26	51	0	0	A_64_P130572	NM_001109400	4870.06	362.232	6.233750e+002	6.243471e+001	634.5	38	8.047626e+000	0	0	0	0	0	0	570.345	1	1	46.5243	39.25
DATA	2177	26	52	0	0	A_42_P658815	NM_198745	4895.22	362.25	1.035046e+003	1.035638e+002	993.5	37	7.136518e+000	0	0	0	0	0	0	942.354	1	1	45.1352	36.9667
DATA	2179	26	54	0	0	A_43_P14809	TC581403	4946.5	362.5	6.276317e+002	6.286269e+001	633.5	35	8.389702e+000	0	0	0	0	0	0	565.578	1	1	57.5363	37.5
DATA	2180	26	55	0	0	A_42_P553319	TC597248	4971.67	362.5	5.054170e+001	6.178837e+000	110	37	6.675666e+000	0	0	0	0	0	0	45.3096	1	1	57.5363	38.125
DATA	2181	26	56	0	0	A_64_P004162	NM_019139	4997.52	362.277	5.039637e+000	3.608939e+000	68	38	9.732574e+000	0	0	0	0	0	0	4.49362	1	0	46.1809	37.0333
DATA	2182	26	57	0	0	A_64_P032450	NM_172330	5022.5	362.5	1.558414e+002	1.599281e+001	208	36	8.965885e+000	0	0	0	0	0	0	138.232	1	1	57.5363	38.5
DATA	2183	26	58	0	0	A_44_P470976	NM_001013133	5047.93	362.044	3.870791e+001	5.294154e+000	97	38	6.476249e+000	0	0	0	0	0	0	34.149	1	1	46.8651	37.6429
DATA	2184	26	59	0	0	A_64_P166428	NM_001037205	5073.33	362.258	1.089549e+002	1.148468e+001	159	39	7.282971e+000	0	0	0	0	0	0	95.6072	1	1	45.835	39.6667
DATA	2185	26	60	0	0	A_43_P11576	NM_012821	5098.67	362.5	1.241026e+001	3.855949e+000	77	46	6.608506e+000	0	0	0	0	0	0	10.8317	1	0	57.5363	44.8788
DATA	2186	26	61	0	0	A_64_P156910	A_64_P156910	5123.9	362.767	1.254983e+002	1.307552e+001	173	40	7.976291e+000	0	0	0	0	0	0	108.953	1	1	47.8731	40.6061
DATA	2187	26	62	0	0	A_64_P126140	NM_001191648	5149.58	362.573	7.029313e+001	7.939120e+000	125	41	8.613199e+000	0	0	0	0	0	0	60.6947	1	1	57.5363	40.5172
DATA	2188	26	63	0	0	A_42_P637122	NM_001108351	5174.52	362.688	2.401896e+003	2.402182e+002	2082	43	9.666568e+000	0	0	0	0	0	0	2063.13	1	1	50.7771	43.0938
DATA	2189	26	64	0	0	A_64_P081208	NM_001009712	5200.12	362.541	5.598082e+003	5.598206e+002	4875	40	8.634988e+000	0	0	0	0	0	0	4782.99	1	1	48.8603	39.2857
DATA	2190	26	65	0	0	A_42_P465608	NM_130894	5225.34	362.329	1.872810e+003	1.873185e+002	1666	44	1.012192e+001	0	0	0	0	0	0	1591.86	1	1	48.8603	44.8966
DATA	2191	26	66	0	0	A_42_P485589	NM_017246	5251.42	362.573	1.079019e+002	1.142930e+001	156	44.5	8.879186e+000	0	0	0	0	0	0	91.2381	1	1	57.5363	45.6071
DATA	2192	26	67	0	0	A_64_P031383	NM_020308	5276.5	362.5	3.035878e+002	3.059407e+001	318	46	9.346676e+000	0	0	0	0	0	0	255.439	1	1	49.1849	43.973
DATA	2193	26	68	0	0	A_44_P220647	NM_001107097	5302	362.545	7.817663e+001	8.694712e+000	127	44	9.020526e+000	0	0	0	0	0	0	65.4577	1	1	55.8519	43.6452
DATA	2194	26	69	0	0	A_44_P294687	NM_080885	5327.37	362.5	2.171199e+002	2.204609e+001	244	40.5	1.024353e+001	0	0	0	1	0	0	180.94	1	1	47.8731	42.0333
DATA	2195	26	70	0	0	A_42_P512838	NM_001106884	5352.58	362.573	4.312840e+002	4.329908e+001	421.5	33	7.730529e+000	0	0	0	0	0	0	357.8	1	1	57.5363	34.7586
DATA	2196	26	71	0	0	A_42_P635228	NM_001107651	5378.37	362.596	5.586301e+001	6.788948e+000	106	36	7.990922e+000	0	0	0	0	0	0	46.1401	1	1	57.8122	38.375
DATA	2197	26	72	0	0	A_44_P254687	NM_001105728	5403.44	362.808	1.091458e+002	1.158158e+001	153.5	37	6.314637e+000	0	0	0	0	0	0	89.782	1	1	48.2044	38.4815
DATA	2198	26	73	0	0	A_64_P049628	NM_001169145	5428.79	362.53	2.709463e+003	2.709742e+002	2273.5	41	1.057125e+001	0	0	0	0	0	0	2219.99	1	1	45.835	41.6857
DATA	2199	26	74	0	0	A_64_P007703	NM_031674	5454.3	362.4	5.777739e+001	6.972720e+000	109	38	8.734775e+000	0	0	0	0	0	0	47.1645	1	1	43.3362	40
DATA	2200	26	75	0	0	A_42_P645376	NM_001014135	5479.67	362.75	1.790588e+004	1.790592e+003	14234	41.5	1.242380e+001	0	0	0	0	0	0	14567.7	1	1	47.5395	44.6875
DATA	2201	26	76	0	0	A_64_P040920	XM_577408	5505.09	362.896	2.327958e+003	2.328290e+002	1973	38	8.049995e+000	0	0	0	0	0	0	1888.1	1	1	46.8651	37.8125
DATA	2202	26	77	0	0	A_42_P819656	NM_130409	5530.59	362.908	2.072306e+003	2.072681e+002	1703.5	41	1.136740e+001	0	0	0	0	0	0	1676.05	1	1	49.1849	42.697
DATA	2203	26	78	0	0	A_64_P018921	NM_001135012	5556.04	363.038	2.116882e+002	2.153407e+001	227	44	1.474566e+001	0	0	0	0	0	0	170.793	1	1	49.1849	49.7188
DATA	2204	26	79	0	0	A_43_P15253	NM_012967	5581.44	363.027	1.951140e+002	1.990873e+001	218	40	1.212398e+001	0	0	0	0	0	0	157.093	1	1	48.5334	41.9063
DATA	2205	26	80	0	0	A_64_P093063	NM_001136272	5606.5	363	1.630454e+002	1.677954e+001	190	40	8.900536e+000	0	0	0	0	0	0	131.054	1	1	65	38.5667
DATA	2206	26	81	0	0	A_44_P477406	NM_012751	5632.35	363.056	2.054399e+002	2.092394e+001	221	35.5	9.049608e+000	0	0	0	0	0	0	164.917	1	1	47.5395	37.0333
DATA	2207	26	82	0	0	A_64_P056816	NM_001100697	5657.2	362.743	6.745579e+001	7.828510e+000	112	38.5	9.269269e+000	0	0	0	0	0	0	54.1039	1	1	46.8651	38.625
DATA	2208	26	83	0	0	A_42_P580733	NM_001006981	5682.79	362.806	3.435028e+003	3.435258e+002	2784	36	7.870177e+000	0	0	0	0	0	0	2754.1	1	1	47.5395	38.0556
DATA	2209	26	84	66	1	DarkCorner	DarkCorner	5708.42	363.29	3.988313e+000	3.973516e+000	57	36	7.594282e+000	0	0	0	0	0	0	-3.25731	0	0	46.8651	37.1613
DATA	2210	26	85	66	1	DarkCorner	DarkCorner	5733.75	363.282	3.985745e+000	3.970958e+000	57	35	8.049660e+000	0	0	0	0	0	0	-1.80383	0	0	47.2035	35.1485
DATA	2211	27	1	66	1	DarkCorner	DarkCorner	3587.88	367.971	3.454062e+000	3.441271e+000	60	35	7.323362e+000	0	0	0	0	0	0	0.119896	0	0	46.8651	34.8204
DATA	2212	27	2	66	1	DarkCorner	DarkCorner	3613.42	368.573	3.441306e+000	3.428539e+000	58.5	36	7.663402e+000	0	0	0	0	0	0	-2.74822	0	0	57.5363	37.5143
DATA	2213	27	3	0	0	A_44_P289922	NM_139103	3638.18	368.361	2.244233e+002	2.270090e+001	270	42	8.246510e+000	0	0	0	0	0	0	209.307	1	1	47.8731	42.8276
DATA	2214	27	4	0	0	A_64_P117149	ENSRNOT00000065538	3664	368.583	1.724411e+003	1.724747e+002	1669.5	43	1.141666e+001	0	0	0	0	0	0	1614.12	1	1	48.5334	44.7333
DATA	2215	27	5	0	0	A_42_P524308	NM_019213	3689.16	368.333	7.560005e+002	7.567612e+001	755	39.5	7.659856e+000	0	0	0	0	0	0	710.104	1	1	49.5074	40.8125
DATA	2216	27	6	0	0	A_64_P037562	XM_001070892	3714.74	368.897	3.248488e+002	3.266030e+001	363	38	6.322218e+000	0	0	0	0	0	0	306.195	1	1	45.835	39.4483
DATA	2217	27	7	0	0	A_44_P267706	XR_085883	3740.42	368.573	1.248711e+001	3.593083e+000	71	40	6.048110e+000	0	0	0	0	0	0	11.8099	1	0	65	40.5313
DATA	2218	27	8	0	0	A_64_P082569	XM_001053354	3765.58	368.573	3.370751e+000	3.368708e+000	63	39	3.961275e+000	0	0	0	0	0	0	2.51715	0	0	65	40.6522
DATA	2219	27	9	0	0	A_64_P000539	NM_053930	3790.61	368.406	6.790920e+003	6.791002e+002	6370.5	39	6.768046e+000	0	0	0	0	0	0	6463.46	1	1	47.5395	38.8387
DATA	2220	27	10	0	0	A_43_P22124	NM_213625	3816	368.423	1.076685e+003	1.077202e+002	1093	36	9.638047e+000	0	0	0	0	0	0	1027.89	1	1	47.8731	38.9333
DATA	2221	27	11	0	0	A_44_P1012556	NM_001013988	3841.57	368.608	5.535577e+002	5.545571e+001	596	36	9.679907e+000	0	0	0	0	0	0	530.03	1	1	49.1849	37.9063
DATA	2222	27	12	0	0	A_64_P115457	NM_001106361	3867.42	368.573	6.239498e+001	7.067068e+000	121	41	9.114811e+000	0	0	0	0	0	0	59.9121	1	1	65	42.1852
DATA	2223	27	13	0	0	A_64_P064229	A_64_P064229	3892.58	368.573	6.868925e+000	3.380329e+000	66.5	36	9.596527e+000	0	0	0	0	0	0	6.61283	1	0	65	37.48
DATA	2224	27	14	0	0	A_64_P039066	ENSRNOT00000041345	3918.09	368.614	4.126225e+001	5.284513e+000	102	40	8.882096e+000	0	0	0	0	0	0	39.8229	1	1	57.259	41.0345
DATA	2225	27	15	0	0	A_42_P574960	ENSRNOT00000068719	3943.01	368.771	3.203645e+002	3.220536e+001	373	42	6.160075e+000	0	0	0	0	0	0	309.896	1	1	46.8651	41.4118
DATA	2226	27	16	0	0	A_42_P600215	NM_175844	3968.76	368.811	2.541990e+001	4.155148e+000	85	40.5	7.947408e+000	0	0	0	0	0	0	24.6429	1	1	48.2044	40.25
DATA	2227	27	17	0	0	A_42_P607770	NM_001134616	3994.01	368.889	3.870285e+003	3.870424e+002	3704	43	8.119802e+000	0	0	0	0	0	0	3759.35	1	1	46.8651	43.2581
DATA	2228	27	18	0	0	A_64_P003348	NM_001077660	4019.37	368.957	3.304403e+002	3.320588e+001	388	39	7.794350e+000	0	0	0	0	0	0	321.543	1	1	46.8651	39.2424
DATA	2229	27	19	0	0	A_64_P057828	A_64_P057828	4044.72	368.882	6.300773e+002	6.309250e+001	688.5	40	7.972353e+000	0	0	0	0	0	0	614.089	1	1	48.8603	40.5926
DATA	2230	27	20	0	0	A_64_P081765	NM_134355	4069.89	369.489	2.245765e+001	3.962587e+000	86.5	42.5	7.619283e+000	0	0	0	0	0	0	21.9187	1	1	38.2652	43.3529
DATA	2231	27	21	0	0	A_42_P758886	NM_019258	4095.65	369	4.218033e+002	4.230618e+001	474	42	8.945714e+000	0	0	0	0	0	0	412.175	1	1	45.4864	42.3226
DATA	2232	27	22	0	0	A_42_P745470	XM_001066818	4120.79	369.093	3.696665e+003	3.696809e+002	3641	40.5	9.457507e+000	0	0	0	0	0	0	3615.86	1	1	48.2044	41.5
DATA	2233	27	23	0	0	A_42_P800949	NM_031787	4146.02	369.152	1.055384e+002	1.104441e+001	167.5	44	7.783089e+000	0	0	0	0	0	0	103.312	1	1	46.1809	43.2
DATA	2234	27	24	0	0	A_42_P738559	NM_012801	4171.64	369.13	7.280151e+003	7.280224e+002	7077	44	7.895146e+000	0	0	0	0	0	0	7130.7	1	1	46.8651	43.6
DATA	2235	27	25	0	0	A_42_P749550	NM_001109359	4197.29	368.754	1.773017e+003	1.773316e+002	1789.5	45	9.504343e+000	0	0	0	0	0	0	1737.22	1	1	45.1352	46.1944
DATA	2236	27	26	0	0	A_64_P007493	ENSRNOT00000006658	4222.81	368.838	2.982224e+001	4.412107e+000	94	45	8.673043e+000	0	0	0	0	0	0	29.2241	1	1	46.1809	45.3103
DATA	2237	27	27	0	0	A_64_P056182	NM_053363	4247.78	369	1.223466e+003	1.223898e+002	1231.5	42	8.304229e+000	0	0	0	0	0	0	1198.83	1	1	46.1809	40.9091
DATA	2238	27	28	0	0	A_42_P818546	NM_001191600	4273.09	368.672	3.379706e+002	3.395324e+001	400	41	8.561326e+000	0	0	0	0	0	0	331.059	1	1	45.1352	41.5
DATA	2239	27	29	0	0	A_44_P407948	XM_001055260	4298.91	369.386	1.817926e+001	3.727922e+000	81	42.5	7.156028e+000	0	0	0	0	0	0	17.7982	1	1	57.259	42.1389
DATA	2240	27	30	66	-1	(-)3xSLv1	NegativeControl	4324.42	369.427	3.269241e+000	3.257112e+000	59	44	1.064943e+001	0	0	0	0	0	0	-5.58521	0	0	57.5363	44.4444
DATA	2241	27	31	0	0	A_64_P044505	NM_031587	4349.58	369.427	2.069636e+002	2.095159e+001	265	40	1.154269e+001	0	0	0	0	0	0	202.272	1	1	57.5363	43.8148
DATA	2242	27	32	0	0	A_42_P685138	NM_153621	4374.68	369.254	2.748718e+002	2.768032e+001	337	41.5	8.616353e+000	0	0	0	1	0	0	268.318	1	1	47.5395	41.1923
DATA	2243	27	33	0	0	A_64_P121747	ENSRNOT00000050332	4400.5	369.352	7.144414e+000	3.346159e+000	70	39	6.816730e+000	0	0	0	0	0	0	6.9639	1	0	65	38.9697
DATA	2244	27	34	0	0	A_42_P791436	NM_012750	4425.5	368.727	6.616188e+002	6.624286e+001	696	38	7.380409e+000	0	0	0	0	0	0	643.832	1	1	46.5243	38.4483
DATA	2245	27	35	0	0	A_44_P349309	NM_001100890	4451.13	368.857	2.856568e+002	2.875344e+001	345.5	40	1.015167e+001	0	0	0	0	0	0	277.451	1	1	45.4864	41.5278
DATA	2246	27	36	0	0	A_42_P502621	NM_024401	4476.58	369.427	1.526738e+001	3.624707e+000	76	39	8.602700e+000	0	0	0	0	0	0	14.7979	1	0	57.5363	40.1613
DATA	2247	27	37	0	0	A_43_P21574	NM_001012043	4502.11	369.5	7.177031e+001	7.897329e+000	134	38	7.948089e+000	0	0	0	0	0	0	69.4017	1	1	65	37.7368
DATA	2248	27	38	0	0	A_44_P496331	NM_001001085	4527.5	369.5	2.245416e+001	3.994382e+000	85	37.5	7.682648e+000	0	0	0	0	0	0	21.6582	1	1	57.5363	38.45
DATA	2249	27	39	0	0	A_64_P016503	ENSRNOT00000003659	4552.79	369.6	6.733682e+001	7.504355e+000	125.5	36	6.641562e+000	0	0	0	0	0	0	64.7728	1	1	47.2035	36.4
DATA	2250	27	40	0	0	A_43_P13270	NM_134415	4577.93	369.507	8.963732e+003	8.963794e+002	8401	37	7.515795e+000	0	0	0	0	0	0	8597.26	1	1	48.5334	39.8889
DATA	2251	27	41	0	0	A_42_P553960	NM_001107831	4603.31	369.014	3.739740e+003	3.739889e+002	3481	41	6.056182e+000	0	0	0	0	0	0	3575.5	1	1	47.2035	40.9655
DATA	2252	27	42	0	0	A_44_P428997	NM_001107661	4629.11	369.5	1.899089e+002	1.928306e+001	243	40	7.581812e+000	0	0	0	0	0	0	180.957	1	1	56.9804	40.25
DATA	2253	27	43	0	0	A_42_P619926	NM_001106578	4654.14	368.924	1.137664e+002	1.186125e+001	172	36.5	8.332228e+000	0	0	0	0	0	0	108.024	1	1	46.1809	38.2941
DATA	2255	27	45	0	0	A_44_P524471	NM_001106408	4704.89	369.352	4.338088e+002	4.351246e+001	482	40	1.393186e+001	0	0	0	0	0	0	408.802	1	1	47.8731	44.825
DATA	2256	27	46	0	0	A_43_P10009	XM_347035	4730.39	369.406	3.442548e+003	3.442716e+002	3312	43.5	1.035066e+001	0	0	0	0	0	0	3230.91	1	1	47.5395	45.3438
DATA	2257	27	47	0	0	A_64_P068112	A_64_P068112	4755.9	369.333	4.656988e+003	4.657113e+002	4551	43	9.515090e+000	0	0	0	0	0	0	4352.17	1	1	45.1352	43.4138
DATA	2258	27	48	0	0	A_44_P191715	NM_021666	4780.95	369.462	3.437038e+000	3.433382e+000	66	40.5	8.767099e+000	0	0	0	0	0	0	2.32404	0	0	50.4627	40.9474
DATA	2259	27	49	0	0	A_64_P035769	NM_001108962	4806.88	369.265	1.371956e+003	1.372387e+002	1331	43	8.337697e+000	0	0	0	0	0	0	1270.75	1	1	45.835	42.4643
DATA	2260	27	50	0	0	A_64_P158469	XM_579990	4831.83	369.21	7.038009e+000	3.526881e+000	69	41.5	1.126384e+001	0	0	0	0	0	0	6.48909	1	0	50.7771	42.8684
DATA	2261	27	51	0	0	A_43_P12811	NM_053464	4857.44	369.521	7.619472e+002	7.627381e+001	768.5	38	8.266646e+000	0	0	0	0	0	0	699.157	1	1	48.2044	39.8621
DATA	2262	27	52	0	0	A_44_P370694	NM_001107961	4883.08	369.226	1.795584e+001	3.924683e+000	82	36	8.326213e+000	0	0	0	0	0	0	16.3946	1	1	44.7812	36.7027
DATA	2263	27	53	0	0	A_42_P749550	NM_001109359	4908.38	369.556	1.782761e+003	1.783106e+002	1680	38	6.485219e+000	0	0	0	0	0	0	1619.7	1	1	48.2044	38.5161
DATA	2264	27	54	0	0	A_64_P125893	ENSRNOT00000021391	4933.44	369.74	8.382813e+003	8.382887e+002	7337	38	8.537988e+000	0	0	0	0	0	0	7578.02	1	1	49.5074	38.5217
DATA	2265	27	55	0	0	A_44_P1000653	NM_031531	4959.27	369.88	4.655731e+003	4.655866e+002	4293	37	5.829653e+000	0	0	0	0	0	0	4186.72	1	1	48.8603	37.2121
DATA	2266	27	56	0	0	A_64_P035992	A_64_P035992	4984.51	370.058	1.579458e+002	1.619121e+001	210	38	1.035515e+001	0	0	0	0	0	0	141.299	1	1	47.8731	39.6667
DATA	2267	27	57	0	0	A_42_P592385	NM_022935	5009.91	369.614	3.825220e+000	3.601217e+000	68	38	8.247934e+000	0	0	0	0	0	0	3.40386	1	0	65	38.1818
DATA	2268	27	58	0	0	A_64_P065624	ENSRNOT00000039260	5035.42	369.573	9.442905e+000	3.721888e+000	71	39	8.727524e+000	0	0	0	0	0	0	8.35778	1	0	57.5363	39.6757
DATA	2269	27	59	0	1	ERCC-00097_63	ERCC-00097_63	5060.58	369.573	2.329949e+001	4.304417e+000	82	39	8.691058e+000	0	0	0	0	0	0	20.5127	1	1	57.5363	39.9655
DATA	2270	27	60	0	0	A_42_P477625	NM_001108719	5085.99	369.616	1.414818e+003	1.415286e+002	1285	45.5	1.021031e+001	0	0	0	0	0	0	1238.91	1	1	48.8603	44.5789
DATA	2271	27	61	0	0	A_42_P788030	NM_031618	5111.14	369.789	1.214963e+004	1.214968e+003	10374.5	42.5	6.730157e+000	0	0	0	0	0	0	10582.6	1	1	47.2035	43.0882
DATA	2272	27	62	0	0	A_44_P278247	XM_219377	5136.5	369.944	3.879343e+003	3.879518e+002	3347.5	40	9.234709e+000	0	0	0	0	0	0	3361	1	1	48.5334	39.5882
DATA	2273	27	63	0	0	A_44_P189262	NM_024000	5162	369.797	8.167588e+003	8.167672e+002	7041	42.5	9.466142e+000	0	0	0	0	0	0	7038.39	1	1	46.8651	43.7059
DATA	2274	27	64	0	0	A_44_P212850	NM_019305	5187.5	370	2.849196e+001	4.683547e+000	88	40	1.161397e+001	0	0	0	0	0	0	24.4233	1	1	54.1152	41.7931
DATA	2275	27	65	0	0	A_64_P144278	NM_001106525	5213.22	369.88	4.645953e+003	4.646103e+002	3977	43	8.916177e+000	0	0	0	0	0	0	3961.48	1	1	50.1463	42.3235
DATA	2276	27	66	0	0	A_44_P683816	NM_001127488	5238.3	369.776	1.771405e+002	1.810788e+001	216.5	44	9.786640e+000	0	0	0	0	0	0	150.277	1	1	45.835	44.7241
DATA	2277	27	67	0	0	A_64_P048712	A_64_P048712	5264.01	370.139	4.876561e+001	6.167016e+000	106	44.5	8.636884e+000	0	0	0	0	0	0	41.1612	1	1	46.8651	42.7188
DATA	2278	27	68	0	0	A_64_P012813	NM_001106456	5290.17	370.121	1.169760e+001	3.970475e+000	70	44	9.016975e+000	0	0	0	0	0	0	9.82362	1	0	46.1809	42.2105
DATA	2280	27	70	0	0	A_42_P598602	NM_001077646	5340	370	3.015302e+001	4.874096e+000	87	35.5	9.851527e+000	0	0	0	0	0	0	25.0896	1	1	54.9904	36.9118
DATA	2281	27	71	0	0	A_44_P375380	NM_001191572	5365.5	370	7.857285e+001	8.748333e+000	128	36	8.558940e+000	0	0	0	0	0	0	65.0871	1	1	65	37.4571
DATA	2282	27	72	0	0	A_64_P113555	NM_001000025	5391.07	370.39	4.980154e+000	3.894926e+000	66	36.5	6.100568e+000	0	0	0	0	0	0	4.10793	1	0	43.3362	36.5714
DATA	2283	27	73	0	0	A_42_P590466	NM_001009676	5415.94	369.538	1.433468e+003	1.433993e+002	1202	40	8.682314e+000	0	0	0	0	0	0	1177.65	1	1	44.4243	39.8485
DATA	2284	27	74	0	0	A_44_P224987	XM_001058317	5441.47	370.118	3.685889e+001	5.361232e+000	90	39	8.975594e+000	0	0	0	0	0	0	30.1673	1	1	46.8651	40.1935
DATA	2285	27	75	0	0	A_42_P557315	NM_001106280	5466.69	369.647	2.549520e+003	2.549819e+002	2087	40	1.034670e+001	0	0	0	0	0	0	2079.24	1	1	46.1809	42.1481
DATA	2286	27	76	0	0	A_44_P375364	A_44_P375364	5492.33	370.205	3.336835e+001	5.147698e+000	89	39	1.047451e+001	0	0	0	0	0	0	27.1256	1	1	51.0895	40.5217
DATA	2287	27	77	0	0	A_44_P880152	NM_031553	5517.76	370.296	1.646013e+002	1.692308e+001	195.5	39	1.006592e+001	0	0	0	0	0	0	133.413	1	1	47.2035	39.9714
DATA	2288	27	78	0	0	A_64_P057575	NM_001191967	5543.8	370.35	8.728199e+001	9.577025e+000	132	41	1.088847e+001	0	0	0	0	0	0	70.5551	1	1	50.4627	43.9394
DATA	2289	27	79	0	0	A_64_P122183	ENSRNOT00000009823	5568.58	370.427	2.980542e+001	4.948745e+000	87	47.5	1.542296e+001	0	0	0	0	0	0	24.0405	1	1	57.5363	49.3571
DATA	2290	27	80	0	0	A_64_P057587	NM_019313	5594	370.455	4.658988e+001	6.113235e+000	98.5	40	5.848273e+000	0	0	0	0	0	0	37.5077	1	1	55.8519	39.7333
DATA	2291	27	81	0	0	A_42_P480769	XM_001081609	5619.42	370.427	2.645372e+002	2.674905e+001	273.5	35	7.458704e+000	0	0	0	0	0	0	212.651	1	1	57.5363	36.0323
DATA	2292	27	82	0	0	A_42_P623151	NM_031026	5644.66	370.122	9.010828e+003	9.010915e+002	7136	35.5	5.313368e+000	0	0	0	1	0	0	7235.59	1	1	48.8603	36.1667
DATA	2293	27	83	0	0	A_42_P550241	NM_022954	5670.33	370.5	8.674062e+000	4.064093e+000	67	39	7.844299e+000	0	0	0	0	0	0	6.96119	1	0	57.5363	38.5405
DATA	2294	27	84	66	1	DarkCorner	DarkCorner	5695.5	370.5	3.985731e+000	3.970944e+000	57.5	37	8.562714e+000	0	0	0	0	0	0	-2.61177	0	0	57.5363	39.1515
DATA	2295	27	85	66	1	DarkCorner	DarkCorner	5721.13	370.3	3.984288e+000	3.974652e+000	59	36	6.080456e+000	0	0	0	0	0	0	1.62305	0	0	43.7019	34.6829
DATA	2296	28	1	66	1	DarkCorner	DarkCorner	3600.31	376.221	3.446089e+000	3.437985e+000	64	36	6.986309e+000	0	0	0	0	0	0	1.66454	0	0	46.5243	36.5
DATA	2297	28	2	0	0	A_42_P802550	NM_017365	3626	376	2.664166e+002	2.686038e+001	306	41	8.943671e+000	0	0	0	0	0	0	248.157	1	1	54.9904	40.4516
DATA	2299	28	4	0	0	A_42_P619926	NM_001106578	3676.21	376.069	1.114913e+002	1.165515e+001	164.5	40	7.842831e+000	0	0	0	0	0	0	104.58	1	1	46.8651	41.52
DATA	2300	28	5	0	0	A_64_P052441	ENSRNOT00000004876	3702.07	375.897	2.684791e+001	4.320500e+000	83	39.5	7.400920e+000	0	0	0	0	0	0	25.2723	1	1	46.8651	39.8824
DATA	2301	28	6	0	0	A_64_P056823	CA510211	3727.23	376.217	7.010936e+000	3.445759e+000	68	42.5	7.918690e+000	0	0	0	0	0	0	6.62175	1	0	46.5243	40.4375
DATA	2302	28	7	0	0	A_42_P669870	NM_001011919	3752.56	375.973	1.536403e+003	1.536771e+002	1487	40	4.272002e+000	0	0	0	0	0	0	1455.87	1	1	48.5334	40
DATA	2303	28	8	0	0	A_42_P683634	NM_012946	3778.5	376	2.921959e+004	2.921961e+003	28247.5	39	5.497878e+000	0	0	0	0	0	0	27778.6	1	1	54.1152	40.32
DATA	2304	28	9	0	0	A_42_P542809	NM_021671	3803.59	375.632	2.897919e+002	2.917121e+001	337	38	6.631531e+000	0	0	0	0	0	0	276.338	1	1	48.2044	38.1481
DATA	2305	28	10	0	0	A_64_P065887	ENSRNOT00000024693	3829	376	1.160065e+002	1.206957e+001	173	35	8.507915e+000	0	0	0	0	0	0	110.951	1	1	46.8651	37.3333
DATA	2306	28	11	0	0	A_64_P043406	NM_001024902	3854.07	376.014	4.356526e+002	4.369175e+001	468	41	8.604420e+000	0	0	0	0	0	0	417.838	1	1	46.8651	40.7297
DATA	2307	28	12	0	0	A_64_P060769	NM_001191090	3879.55	375.687	7.162544e+002	7.170204e+001	772	39	9.855515e+000	0	0	0	0	0	0	688.819	1	1	46.5243	39.7419
DATA	2308	28	13	0	0	A_64_P150789	A_64_P150789	3905.4	375.658	4.115831e+000	3.330263e+000	66	37	7.935058e+000	0	0	0	0	0	0	3.96846	1	0	47.8731	38.1842
DATA	2309	28	14	0	0	A_64_P110254	NM_022404	3930.5	376.231	3.551708e+003	3.551862e+002	3511	41	7.197516e+000	0	0	0	0	0	0	3432.71	1	1	49.8279	42.2143
DATA	2310	28	15	0	0	A_42_P700753	FQ212883	3955.6	376.192	9.003708e+002	9.009716e+001	927	41	6.893382e+000	0	0	0	0	0	0	872.123	1	1	48.2044	41.7647
DATA	2311	28	16	0	0	A_42_P503768	NM_001009466	3980.92	376	1.554216e+002	1.588509e+001	216.5	40	8.254563e+000	0	0	0	0	0	0	150.853	1	1	46.8651	40.7429
DATA	2312	28	17	0	0	A_64_P106021	ENSRNOT00000017892	4006.52	375.781	5.641630e+001	6.524172e+000	117	40	7.249257e+000	0	0	0	0	0	0	54.8614	1	1	44.7812	40.1379
DATA	2313	28	18	0	0	A_43_P10861	NM_001024879	4032.42	376.427	1.489315e+002	1.524813e+001	208	40	6.033160e+000	0	0	0	0	0	0	145.08	1	1	57.5363	40.4483
DATA	2314	28	19	0	0	A_44_P562251	BF545174	4057.58	376.427	4.968742e+001	5.946105e+000	110	41	8.719182e+000	0	0	0	0	0	0	48.4742	1	1	57.5363	42.1
DATA	2315	28	20	0	0	A_42_P608768	ENSRNOT00000009898	4083.11	376.5	7.463228e+001	8.144918e+000	130	43	7.446781e+000	0	0	0	0	0	0	72.9052	1	1	56.9804	41.2727
DATA	2316	28	21	0	0	A_64_P117115	NM_001109329	4108.5	376.5	1.323463e+001	3.516843e+000	76	39	4.810405e+000	0	0	0	0	0	0	12.9425	1	0	57.5363	38.84
DATA	2317	28	22	0	0	A_64_P043331	ENSRNOT00000032411	4133.46	376.244	1.073163e+002	1.121455e+001	166	44	8.734169e+000	0	0	0	0	0	0	105.039	1	1	50.1463	43
DATA	2318	28	23	0	0	A_42_P664274	NM_001079705	4158.91	376.427	5.059708e+002	5.070156e+001	552	43	8.290973e+000	0	0	0	0	0	0	495.573	1	1	50.7771	42.8667
DATA	2319	28	24	0	0	A_64_P044593	NM_001173451	4184.12	376.397	1.901302e+002	1.928909e+001	242.5	45.5	9.465560e+000	0	0	0	0	0	0	186.309	1	1	48.5334	45.9444
DATA	2320	28	25	0	0	A_64_P006978	NM_001109371	4210.11	376.5	2.408812e+001	4.046092e+000	88	47.5	9.811053e+000	0	0	0	0	0	0	23.6101	1	1	56.9804	46.5
DATA	2321	28	26	0	0	A_64_P119390	NM_001109519	4234.91	376.333	1.375462e+001	3.529864e+000	76	44	9.728362e+000	0	0	0	0	0	0	13.4819	1	0	49.1849	43.8718
DATA	2322	28	27	0	0	A_64_P034714	A_64_P034714	4261.03	376.462	1.069021e+001	3.422720e+000	72.5	40	9.415820e+000	0	0	0	0	0	0	10.4762	1	0	44.4243	40.8108
DATA	2323	28	28	0	0	A_44_P535959	NM_001107650	4285.93	376.035	1.543749e+002	1.577649e+001	216.5	39	6.414925e+000	0	0	0	0	0	0	151.22	1	1	43.3362	38.7143
DATA	2324	28	29	0	0	A_64_P286274	ENSRNOT00000055318	4311.5	376.5	1.429538e+002	1.466126e+001	197.5	44	8.986378e+000	0	0	0	0	0	0	139.944	1	1	49.1849	42.7037
DATA	2325	28	30	0	0	A_44_P333384	NM_001024788	4337	376.545	2.388317e+001	4.039450e+000	86	42	1.030033e+001	0	0	0	0	0	0	23.3599	1	1	55.8519	45.5926
DATA	2326	28	31	0	0	A_42_P522194	NM_012914	4362.38	376.658	7.309552e+001	8.004112e+000	134	39	9.464756e+000	0	0	0	0	0	0	71.4162	1	1	49.1849	41.0667
DATA	2327	28	32	0	0	A_44_P273859	NM_017021	4387.98	376.557	3.277847e+000	3.269217e+000	66	41.5	8.241259e+000	0	0	0	0	0	0	1.48202	0	0	43.7019	41.2188
DATA	2328	28	33	0	0	A_43_P11665	NM_013024	4413.28	376.113	4.688059e+001	5.716280e+000	109	39	5.513754e+000	0	0	0	0	0	0	45.6713	1	1	47.5395	38.4828
DATA	2329	28	34	0	0	A_64_P118273	NM_001170593	4438.51	376.385	3.406770e+001	4.726670e+000	98	38	9.685783e+000	0	0	0	0	0	0	33.1311	1	1	45.4864	39.7576
DATA	2330	28	35	0	0	A_42_P762814	NM_031318	4463.62	376.377	1.883596e+003	1.883882e+002	1838	39.5	7.070564e+000	0	0	0	0	0	0	1828.22	1	1	49.5074	41.6471
DATA	2331	28	36	0	0	A_44_P384017	NM_031688	4488.93	376.134	1.763509e+002	1.793938e+001	240	42.5	1.043806e+001	0	0	0	0	0	0	170.79	1	1	46.5243	42.5789
DATA	2332	28	37	0	0	A_64_P118872	A_64_P118872	4514.58	376.573	8.921142e+000	3.416655e+000	71	38	6.993233e+000	0	0	0	0	0	0	8.61893	1	0	65	38.0303
DATA	2333	28	38	0	0	A_42_P599210	NM_001008326	4539.89	376.648	6.996670e+002	7.004480e+001	749	37.5	6.352831e+000	0	0	0	0	0	0	674.2	1	1	47.8731	37.5789
DATA	2334	28	39	0	0	A_44_P305801	NM_001033894	4565.25	376.792	1.651928e+003	1.652261e+002	1633.5	35.5	6.314927e+000	0	0	0	0	0	0	1587.31	1	1	47.5395	36.2143
DATA	2335	28	40	0	0	A_64_P085462	A_64_P085462	4590.77	376.843	2.431322e+004	2.431324e+003	23624.5	40	6.320175e+000	0	0	0	0	0	0	23291.1	1	1	51.0895	39.7692
DATA	2336	28	41	0	0	A_42_P488000	NM_001108479	4615.89	376.648	3.472203e+002	3.488201e+001	402	39	6.113355e+000	0	0	0	0	0	0	331.558	1	1	47.8731	38.5429
DATA	2337	28	42	0	0	A_42_P818546	NM_001191600	4641.46	376.618	3.385811e+002	3.402329e+001	386	41	6.943812e+000	0	0	0	0	0	0	322.195	1	1	47.2035	40.2963
DATA	2338	28	43	0	0	A_44_P488489	TC610872	4667	376.797	7.092830e+002	7.100787e+001	751	36.5	1.077021e+001	0	0	0	0	0	0	672.515	1	1	46.8651	39.45
DATA	2339	28	44	0	0	A_64_P153971	A_64_P153971	4692.28	376.703	5.182624e+000	3.412919e+000	69.5	38	9.114083e+000	0	0	0	0	0	0	4.89542	1	0	45.1352	39.069
DATA	2340	28	45	0	0	A_64_P077985	NM_001170478	4717.91	376.935	3.338782e+001	4.755838e+000	93	43	1.311098e+001	0	0	0	0	0	0	31.4121	1	1	65	46.0909
DATA	2341	28	46	0	0	A_44_P576822	NM_080771	4743.08	376.89	5.352906e+002	5.363698e+001	564	43.5	1.086786e+001	0	0	0	0	0	0	501.556	1	1	46.8651	45.6
DATA	2342	28	47	0	0	A_64_P134310	A_64_P134310	4768.43	377.016	4.669582e+001	5.785246e+000	107	43	9.117370e+000	0	0	0	0	0	0	43.5666	1	1	44.0646	43.6667
DATA	2343	28	48	0	0	A_64_P134706	NM_001107533	4794	377	7.963893e+000	3.521784e+000	72	41	8.936238e+000	0	0	0	0	0	0	7.3971	1	0	54.9904	41.9722
DATA	2344	28	49	0	0	A_42_P469751	XM_001054007	4819.24	376.971	1.013822e+003	1.014408e+002	1031	41	9.347427e+000	0	0	0	0	0	0	937.396	1	1	46.1809	40.9756
DATA	2345	28	50	0	0	A_64_P082653	ENSRNOT00000020906	4845.09	376.765	4.600019e+001	5.757695e+000	105	38	1.069304e+001	0	0	0	0	0	0	42.3287	1	1	46.1809	40.2
DATA	2346	28	51	0	0	A_43_P18902	NM_001109221	4869.77	376.919	6.939368e+001	7.762631e+000	130	38	7.651396e+000	0	0	0	0	0	0	63.5569	1	1	44.7812	37.6667
DATA	2347	28	52	0	0	A_64_P086719	ENSRNOT00000065918	4895.5	377	4.122461e+000	3.520652e+000	67	36	7.264875e+000	0	0	0	0	0	0	3.75692	1	0	54.1152	36.1818
DATA	2348	28	53	0	0	A_64_P138585	TC587165	4920.8	377	2.537198e+003	2.537441e+002	2330	40	6.465475e+000	0	0	0	0	0	0	2300.66	1	1	49.1849	40.4348
DATA	2349	28	54	0	0	A_64_P230444	ENSRNOT00000010282	4946.17	377	2.576760e+003	2.577002e+002	2327	39	7.979860e+000	0	0	0	0	0	0	2324.62	1	1	46.8651	38.6667
DATA	2350	28	55	0	0	A_64_P124427	TC642834	4971.58	377.427	4.152310e+001	5.463177e+000	100	39	8.965575e+000	0	0	0	0	0	0	37.2671	1	1	57.5363	40.3077
DATA	2351	28	56	0	0	A_42_P778587	NM_001135767	4996.85	376.924	1.299905e+002	1.348011e+001	182	37	9.043616e+000	0	0	0	0	0	0	116.054	1	1	46.1809	36.9706
DATA	2352	28	57	0	0	A_42_P526030	NM_057197	5022.17	376.677	2.970317e+003	2.970533e+002	2644	41	9.613799e+000	0	0	0	0	0	0	2637.82	1	1	45.4864	40.3824
DATA	2353	28	58	0	0	A_64_P022561	XM_001070923	5048.1	377.314	4.604455e+001	5.849352e+000	105	37	6.806859e+000	0	0	0	0	0	0	40.6701	1	1	47.2035	36.8889
DATA	2354	28	59	0	0	A_64_P126226	NM_001105901	5073.42	377.427	7.936771e+001	8.726161e+000	134.5	43.5	1.002718e+001	0	0	0	0	0	0	69.7305	1	1	65	44.3125
DATA	2355	28	60	0	0	A_64_P089541	NM_001106214	5098.58	377.427	1.463811e+002	1.508537e+001	197	46	8.000403e+000	0	0	0	0	0	0	127.925	1	1	65	45.1613
DATA	2356	28	61	0	0	A_44_P205869	NM_138891	5124.25	377.137	2.906770e+002	2.929797e+001	316	43	6.940734e+000	0	0	0	0	0	0	252.648	1	1	47.8731	43.4074
DATA	2357	28	62	0	0	A_44_P491796	NM_012881	5149.58	377.427	3.385759e+001	5.004630e+000	93	43	8.631448e+000	0	0	0	0	0	0	29.2725	1	1	57.5363	41.4242
DATA	2358	28	63	0	0	A_64_P132706	NM_001008304	5174.69	377.338	2.400142e+004	2.400145e+003	20154.5	43	1.259735e+001	0	0	0	0	0	0	20642.5	1	1	48.5334	44.4545
DATA	2359	28	64	0	0	A_64_P040715	NM_001011979	5200	377.191	4.814500e+002	4.828884e+001	472	40	1.031870e+001	0	0	0	0	0	0	411.909	1	1	46.8651	41.7714
DATA	2360	28	65	0	0	A_44_P191055	NM_001107693	5225.5	376.727	1.502506e+003	1.502972e+002	1300	43	8.765401e+000	0	0	0	0	0	0	1278.77	1	1	46.5243	43.0323
DATA	2361	28	66	0	0	A_64_P077493	XR_005942	5251.33	377.5	1.042158e+001	3.904666e+000	71.5	44.5	9.736824e+000	0	0	0	0	0	0	8.82465	1	0	65	44.4333
DATA	2362	28	67	0	0	A_44_P317600	NM_012612	5276.44	377.059	1.377848e+002	1.428804e+001	179	39	9.970751e+000	0	0	0	0	0	0	116.095	1	1	46.5243	40.1111
DATA	2363	28	68	0	0	A_42_P751368	NM_001047874	5301.99	377.31	1.621275e+003	1.621721e+002	1398	42	8.693000e+000	0	0	0	0	0	0	1359.45	1	1	47.2035	42.5556
DATA	2364	28	69	0	0	A_42_P711568	NM_001107584	5327.07	377.268	3.934690e+003	3.934875e+002	3374	39	1.104047e+001	0	0	0	0	0	0	3283.98	1	1	47.5395	39.2727
DATA	2365	28	70	0	0	A_64_P091817	A_64_P091817	5352.69	377.338	2.596662e+002	2.624832e+001	283	34	1.006141e+001	0	0	0	0	0	0	215.736	1	1	48.5334	37.3429
DATA	2366	28	71	0	0	A_64_P006628	NM_172328	5378.33	377.5	2.798172e+001	4.761094e+000	84	36	7.312519e+000	0	0	0	0	0	0	23.1464	1	1	57.5363	36.6296
DATA	2367	28	72	0	0	A_64_P057760	NM_001191643	5403.54	377.583	1.016899e+002	1.087974e+001	147.5	37	5.747042e+000	0	0	0	0	0	0	83.7736	1	1	48.2044	38.4815
DATA	2368	28	73	0	0	A_44_P150013	NM_001134495	5428.89	377.5	3.897490e+000	3.883030e+000	59	40.5	9.360531e+000	0	0	0	0	0	0	-3.32331	0	0	65	40.3667
DATA	2369	28	74	0	0	A_44_P526975	NM_001002822	5454.42	377.573	1.161332e+002	1.224983e+001	159	39	9.627035e+000	0	0	0	0	0	0	94.9491	1	1	57.5363	39.5862
DATA	2370	28	75	66	-1	(-)3xSLv1	NegativeControl	5479.58	377.573	3.924998e+000	3.910436e+000	57.5	45	9.734128e+000	0	0	0	0	0	0	-5.06739	0	0	57.5363	46.0909
DATA	2371	28	76	0	0	A_42_P648937	NM_001191732	5504.75	377.356	6.480524e+002	6.492385e+001	574.5	36.5	8.751115e+000	0	0	0	0	0	0	526.43	1	1	48.5334	36.7143
DATA	2372	28	77	0	0	A_44_P533786	NM_053749	5530.5	377.5	3.664510e+001	5.376035e+000	93	38	7.650038e+000	0	0	0	0	0	0	29.6844	1	1	57.5363	39.2
DATA	2373	28	78	0	0	A_64_P156165	S68987	5555.99	377.6	3.654297e+003	3.654510e+002	3036	48	1.374452e+001	0	0	0	0	0	0	2952.95	1	1	49.1849	48.3871
DATA	2374	28	79	0	0	A_64_P084293	NM_001000525	5581.24	377.944	2.065081e+001	4.458305e+000	78	42.5	1.268491e+001	0	0	0	0	0	0	16.6537	1	1	47.5395	44.3
DATA	2375	28	80	0	0	A_42_P708569	NM_001191837	5606.44	377.534	3.092044e+003	3.092297e+002	2550	40.5	6.584227e+000	0	0	0	0	0	0	2489.26	1	1	49.1849	39.2647
DATA	2376	28	81	0	0	A_64_P112215	NM_001110141	5632.18	377.313	2.990396e+002	3.016544e+001	299	36.5	9.056262e+000	0	0	0	0	0	0	240.426	1	1	45.835	38.3571
DATA	2377	28	82	0	0	A_42_P567793	NM_001107668	5657.46	377.386	1.329511e+003	1.330102e+002	1103	37	7.835815e+000	0	0	0	0	0	0	1068.04	1	1	47.5395	37.2
DATA	2378	28	83	0	0	A_42_P481087	XM_232226	5682.89	377.639	5.762533e+002	5.776178e+001	515	37	8.771042e+000	0	0	0	0	0	0	462.764	1	1	48.2044	37.7419
DATA	2379	28	84	66	1	DarkCorner	DarkCorner	5708.8	377.394	3.982205e+000	3.967431e+000	54	38	8.199134e+000	0	0	0	0	0	0	-3.93583	0	0	47.5395	38.6774
DATA	2380	28	85	66	1	DarkCorner	DarkCorner	5733.5	377.648	3.979596e+000	3.964832e+000	56.5	34	7.480532e+000	0	0	0	0	0	0	-1.32209	0	0	57.5363	34.1499
DATA	2381	29	1	66	1	DarkCorner	DarkCorner	3587.2	383.333	4.304023e+000	3.464926e+000	66	35	7.826651e+000	0	0	0	0	0	0	3.98894	1	0	40.2912	35.8717
DATA	2382	29	2	66	1	DarkCorner	DarkCorner	3613.08	383.5	3.438245e+000	3.425489e+000	61	39	9.219339e+000	0	0	0	0	0	0	-3.33461	0	0	48.5334	39.0606
DATA	2383	29	3	0	0	A_64_P096512	NM_031782	3638.38	383.068	5.371089e+003	5.371197e+002	4710.5	41	9.093385e+000	0	0	0	0	0	0	5013.84	1	1	49.1849	42.2414
DATA	2384	29	4	0	0	A_44_P172814	NM_173102	3663.86	382.844	1.090819e+004	1.090825e+003	10434.5	39.5	7.418963e+000	0	0	0	0	0	0	10218.6	1	1	45.4864	41.3214
DATA	2385	29	5	0	0	A_42_P788040	NM_001025053	3689.42	382.894	5.036463e+001	6.070840e+000	105	40	5.674610e+000	0	0	0	0	0	0	47.3459	1	1	45.4864	40.5135
DATA	2386	29	6	0	0	A_42_P808945	NM_181368	3714.54	383.176	5.610757e+002	5.620917e+001	599	40.5	8.705436e+000	0	0	0	0	0	0	529.232	1	1	48.8603	39.7692
DATA	2387	29	7	0	0	A_64_P162713	A_64_P162713	3740.42	383.427	3.379203e+000	3.366899e+000	62	40	5.420268e+000	0	0	0	0	0	0	0.375183	0	0	57.5363	40
DATA	2388	29	8	0	0	A_44_P501204	NM_017361	3765.67	383.329	1.443887e+002	1.482373e+001	201	39	4.170189e+000	0	0	0	0	0	0	137.097	1	1	48.2044	40.9048
DATA	2389	29	9	0	0	A_42_P785926	NM_001108289	3791.11	383.5	6.030316e+002	6.039589e+001	624.5	39	7.435382e+000	0	0	0	0	0	0	574.377	1	1	56.9804	40.1481
DATA	2390	29	10	0	0	A_42_P616287	NM_001134555	3816.26	382.908	3.267007e+002	3.283990e+001	375	36.5	8.103103e+000	0	0	0	1	0	0	312.099	1	1	45.835	38.7813
DATA	2391	29	11	66	-1	(-)3xSLv1	NegativeControl	3841.19	382.923	3.338404e+000	3.326019e+000	55	37	8.695874e+000	0	0	0	0	0	0	-7.88318	0	0	49.1849	38.7586
DATA	2392	29	12	0	0	A_43_P12365	NM_023101	3867.33	383.5	2.835873e+001	4.363645e+000	88	39	8.756798e+000	0	0	0	0	0	0	27.2462	1	1	57.5363	40.2821
DATA	2393	29	13	0	0	A_64_P076643	ENSRNOT00000057620	3892.64	383.485	3.320204e+000	3.307886e+000	59	37	8.870478e+000	0	0	0	0	0	0	-1.67439	0	0	45.835	38.2647
DATA	2394	29	14	0	0	A_64_P074865	XR_008898	3918.11	383.5	4.618845e+000	3.331897e+000	67	41	7.286110e+000	0	0	0	0	0	0	4.46022	1	0	65	40.1714
DATA	2395	29	15	0	0	A_64_P009582	XM_214287	3942.99	383.397	1.308613e+004	1.308617e+003	12287	42.5	5.552444e+000	0	0	0	0	0	0	12665.2	1	1	48.5334	42.4063
DATA	2396	29	16	0	0	A_44_P527270	NM_020073	3968.38	383.514	6.065678e+001	6.898217e+000	121	40.5	7.694976e+000	0	0	0	0	0	0	58.8315	1	1	48.2044	39.2368
DATA	2397	29	17	0	0	A_44_P530813	NM_012922	3993.97	383.136	2.099341e+002	2.124792e+001	268	43	9.551365e+000	0	0	0	0	0	0	204.017	1	1	46.5243	42.1667
DATA	2398	29	18	0	0	A_64_P078210	NM_001044303	4019.29	383.333	2.624317e+001	4.195173e+000	87	41	6.568624e+000	0	0	0	0	0	0	25.5489	1	1	45.835	40.5357
DATA	2399	29	19	0	0	A_42_P764985	NM_133402	4044.68	383.254	3.012093e+003	3.012270e+002	2881.5	39.5	8.277098e+000	0	0	0	0	0	0	2937.07	1	1	47.5395	41.2
DATA	2400	29	20	0	0	A_43_P23097	NM_001011965	4070.42	383.573	2.850864e+001	4.333066e+000	90	41	8.131050e+000	0	0	0	0	0	0	27.8383	1	1	57.5363	40.7742
DATA	2401	29	21	0	0	A_43_P19450	NM_001105713	4095.5	383.5	1.132090e+002	1.178073e+001	174.5	40	8.942243e+000	0	0	0	0	0	0	110.677	1	1	49.1849	40.1875
DATA	2402	29	22	0	0	A_42_P514419	NM_001009599	4120.8	383.662	4.792684e+002	4.803732e+001	534.5	40	8.727250e+000	0	0	0	0	0	0	469.018	1	1	48.8603	40.3235
DATA	2403	29	23	0	0	A_64_P123974	A_64_P123974	4146.84	383.536	6.899860e+000	3.325797e+000	70.5	41	8.326025e+000	0	0	0	0	0	0	6.75769	1	0	42.9674	41.9714
DATA	2404	29	24	0	0	A_64_P221399	NM_134415	4171.57	383.761	1.206154e+003	1.206593e+002	1268	41.5	9.919367e+000	0	0	0	0	0	0	1181.97	1	1	46.5243	44.0769
DATA	2405	29	25	0	0	A_44_P760124	A_44_P760124	4197.59	383.229	2.688024e+002	2.707606e+001	332	42	1.019172e+001	0	0	0	0	0	0	263.504	1	1	47.2035	44.225
DATA	2406	29	26	0	0	A_42_P589551	NM_001037093	4222.58	383.573	1.144265e+003	1.144727e+002	1190.5	45	9.396239e+000	0	0	0	0	0	0	1121.88	1	1	57.5363	45.0313
DATA	2407	29	27	0	0	A_42_P645467	NM_001108804	4248.29	383.5	1.589885e+001	3.618284e+000	78	45	8.916663e+000	0	0	0	0	0	0	15.5864	1	0	46.5243	44.4318
DATA	2408	29	28	0	0	A_64_P036006	A_64_P036006	4273.84	383	3.878245e+000	3.274379e+000	65.5	41	8.661418e+000	0	0	0	0	0	0	3.8008	1	0	46.8651	43.5429
DATA	2409	29	29	0	0	A_64_P088575	NM_001106355	4298.91	383.614	1.736525e+002	1.766730e+001	235	40.5	8.975771e+000	0	0	0	0	0	0	170.1	1	1	65	41.1429
DATA	2410	29	30	0	0	A_42_P798776	XM_002725203	4324.21	383.74	2.229631e+003	2.229868e+002	2217	48	9.895753e+000	0	0	0	0	0	0	2182.39	1	1	48.5334	49.1852
DATA	2411	29	31	0	0	A_64_P017424	XM_001067041	4349.5	384	3.270640e+000	3.259893e+000	62	38.5	6.847915e+000	0	0	0	0	0	0	0.929868	0	0	54.1152	39.3182
DATA	2412	29	32	0	0	A_64_P147358	NM_001105764	4374.66	383.985	8.404909e+002	8.411238e+001	877	42.5	9.338717e+000	0	0	0	0	0	0	820.918	1	1	46.1809	43.2143
DATA	2413	29	33	0	0	A_42_P522285	NM_001044263	4400.5	384	2.904536e+002	2.922852e+001	345	42	6.731311e+000	0	0	0	0	0	0	283.279	1	1	54.1152	41.1852
DATA	2414	29	34	0	0	A_64_P130184	NM_017207	4425.7	383.827	6.780944e+002	6.788836e+001	729	39	8.949475e+000	0	0	0	0	0	0	660.262	1	1	49.8279	40.1
DATA	2415	29	35	0	0	A_44_P167930	NM_012720	4451	383.797	3.878978e+003	3.879116e+002	3832	43	8.453532e+000	0	0	0	0	0	0	3769.95	1	1	46.8651	42.2927
DATA	2416	29	36	0	0	A_64_P135305	NM_001013426	4476.27	383.7	2.872701e+003	2.872889e+002	2800.5	43	9.040733e+000	0	0	0	0	0	0	2786.17	1	1	46.8651	44.1212
DATA	2417	29	37	0	0	A_64_P100182	NM_001077678	4502	384	7.422252e+000	3.375595e+000	71	40	1.092731e+001	0	0	0	0	0	0	7.18202	1	0	54.9904	40.2564
DATA	2418	29	38	0	0	A_44_P521699	NM_001007728	4526.99	384.081	2.468354e+002	2.490330e+001	298	38	7.292704e+000	0	0	0	0	0	0	238.258	1	1	46.8651	37.359
DATA	2419	29	39	0	0	A_64_P053516	NM_001001280	4552.75	383.986	3.322581e+000	3.317170e+000	65	37.5	6.062090e+000	0	0	0	0	0	0	2.06083	0	0	47.8731	37.8158
DATA	2420	29	40	0	0	A_64_P073183	XM_001061392	4577.85	384.097	3.703637e+003	3.703786e+002	3533	37	6.864631e+000	0	0	0	0	0	0	3554.8	1	1	46.8651	38.1379
DATA	2421	29	41	0	0	A_64_P067447	NM_001109440	4603.36	383.742	5.291020e+002	5.301491e+001	567	41	5.668039e+000	0	0	0	0	0	0	506.239	1	1	46.1809	40.72
DATA	2422	29	42	0	0	A_64_P089251	NM_001014109	4629.19	383.958	7.567562e+001	8.272478e+000	136.5	40	6.079927e+000	0	0	0	0	0	0	72.1622	1	1	46.8651	40.5862
DATA	2423	29	43	0	0	A_64_P118192	NM_022797	4654.23	383.905	6.396925e+002	6.405707e+001	666.5	37	6.981851e+000	0	0	0	0	0	0	607.885	1	1	47.8731	38.7097
DATA	2424	29	44	0	0	A_64_P082584	ENSRNOT00000024258	4679.55	383.627	1.494427e+002	1.531856e+001	206	38	9.506975e+000	0	0	0	0	0	0	141.488	1	1	46.1809	39.4848
DATA	2425	29	45	0	0	A_42_P465677	NM_001106241	4705.08	383.904	1.364547e+002	1.405752e+001	191.5	39	1.070022e+001	0	0	0	0	0	0	128.692	1	1	46.8651	40.8065
DATA	2426	29	46	0	0	A_42_P781999	NM_001106378	4730.32	384.253	1.136802e+004	1.136807e+003	10500	43.5	1.063058e+001	0	0	0	0	0	0	10678.7	1	1	49.1849	44.75
DATA	2427	29	47	0	0	A_44_P991472	NM_134374	4755.56	384.26	7.477129e+002	7.484883e+001	738	43	9.381043e+000	0	0	0	0	0	0	699.45	1	1	49.5074	44.1786
DATA	2428	29	48	0	0	A_42_P767737	AY724480	4781	384.271	1.904761e+003	1.905069e+002	1794	42	8.846370e+000	0	0	0	0	0	0	1774.07	1	1	46.8651	43.7297
DATA	2429	29	49	0	0	A_42_P648200	NM_001037356	4806.56	383.534	9.990269e+001	1.056490e+001	155	39.5	8.315953e+000	0	0	0	0	0	0	92.624	1	1	47.8731	40.7647
DATA	2430	29	50	0	0	A_64_P006062	NM_001191695	4832.2	384.13	7.182232e+001	7.969066e+000	133	40.5	9.524294e+000	0	0	0	0	0	0	66.2817	1	1	46.5243	40.825
DATA	2431	29	51	0	0	A_42_P728230	NM_001037782	4857.26	384.257	1.517240e+003	1.517637e+002	1438	38.5	1.028446e+001	0	0	0	0	0	0	1393.66	1	1	48.8603	40.1875
DATA	2432	29	52	0	0	A_64_P106011	A_64_P106011	4883	384.455	5.178027e+000	3.524304e+000	68	36	7.576114e+000	0	0	0	0	0	0	4.73293	1	0	55.8519	36.2353
DATA	2433	29	53	0	0	A_42_P622661	NM_001024292	4908.25	384.356	9.438795e+002	9.445295e+001	916.5	37	6.685032e+000	0	0	0	0	0	0	858.486	1	1	48.5334	38
DATA	2434	29	54	0	0	A_42_P619844	NM_001030037	4933.45	384.346	3.547326e+003	3.547501e+002	3034	43	9.488265e+000	0	0	0	0	0	0	3210.23	1	1	49.8279	42.875
DATA	2436	29	56	0	0	A_64_P128260	XM_001056985	4984.2	384.557	5.868355e+002	5.879129e+001	585	37	7.943923e+000	0	0	0	0	0	0	525.611	1	1	47.5395	38.0345
DATA	2437	29	57	0	0	A_44_P1034950	NM_053294	5009.94	383.825	1.860201e+002	1.894276e+001	229	39	8.700715e+000	0	0	0	0	0	0	165.716	1	1	45.4864	39.561
DATA	2438	29	58	0	0	A_64_P080316	NM_139113	5035.25	384.342	1.491257e+002	1.533993e+001	194.5	39	9.267140e+000	0	0	0	0	0	0	132.153	1	1	48.2044	39.1892
DATA	2439	29	59	0	0	A_64_P053069	NM_001106820	5060.5	384.284	3.771063e+002	3.788349e+001	397	41	1.071992e+001	0	0	0	0	0	0	332.413	1	1	49.1849	42.6
DATA	2440	29	60	0	0	A_42_P498066	NM_031136	5086.11	384.5	5.103745e+004	5.103746e+003	43368.5	44	9.840011e+000	0	0	0	0	0	0	44747.3	1	1	56.9804	43.7027
DATA	2441	29	61	0	0	A_44_P277068	ENSRNOT00000058491	5111.37	384.37	3.074741e+003	3.074958e+002	2791.5	45	9.429225e+000	0	0	0	0	0	0	2681.44	1	1	48.2044	44.8438
DATA	2442	29	62	0	0	A_44_P685613	XM_225679	5136.81	384.519	8.295998e+002	8.304127e+001	775	41.5	9.780111e+000	0	0	0	0	0	0	719.634	1	1	49.8279	39.9333
DATA	2443	29	63	0	0	A_64_P124364	ENSRNOT00000015807	5162.42	384.573	1.309808e+002	1.360875e+001	178	41.5	8.580332e+000	0	0	0	0	0	0	113.013	1	1	65	42.1176
DATA	2444	29	64	0	0	A_42_P466362	NM_017142	5187.58	384.573	2.540633e+002	2.567612e+001	284	45	1.204088e+001	0	0	0	0	0	0	218.071	1	1	57.5363	44.871
DATA	2445	29	65	0	0	A_64_P081517	ENSRNOT00000037639	5213.11	384.5	7.613116e+001	8.478541e+000	126.5	39	9.626469e+000	0	0	0	0	0	0	65.0052	1	1	56.9804	40.9143
DATA	2446	29	66	0	0	A_42_P629394	NM_031683	5238.26	384.257	1.361088e+003	1.361604e+002	1188.5	42	8.034870e+000	0	0	0	0	0	0	1156.28	1	1	48.8603	43.3226
DATA	2447	29	67	0	0	A_44_P500975	NM_001000833	5263.58	384.573	3.735466e+001	5.306873e+000	95	39	8.820626e+000	0	0	0	0	0	0	31.5763	1	1	57.5363	39.7
DATA	2448	29	68	0	0	A_64_P165046	ENSRNOT00000015927	5289	384.25	3.766985e+001	5.342316e+000	92	42	9.124678e+000	0	0	0	0	0	0	31.6859	1	1	47.2035	41.122
DATA	2449	29	69	0	0	A_44_P222865	XM_235305	5314.57	384.608	3.579983e+003	3.580186e+002	3074.5	42	1.000948e+001	0	0	0	0	0	0	2997	1	1	49.1849	41.2414
DATA	2451	29	71	0	0	A_64_P131688	XM_574187	5365.5	384.648	3.855175e+000	3.840872e+000	59	37	7.181325e+000	0	0	0	0	0	0	-1.97486	0	0	57.5363	37
DATA	2452	29	72	0	0	A_42_P556457	NM_001033931	5390.56	384.733	9.772066e+002	9.779674e+001	884	37	5.897157e+000	0	0	0	1	0	0	807.319	1	1	49.1849	36.5357
DATA	2453	29	73	0	0	A_42_P734384	NM_001108406	5416.18	384.361	1.817201e+003	1.817614e+002	1508	38	6.771990e+000	0	0	0	1	0	0	1495.14	1	1	47.8731	38.1212
DATA	2454	29	74	0	0	A_42_P728032	XM_001066058	5441.56	384.733	8.966918e+002	8.975340e+001	795	37	9.458110e+000	0	0	0	0	0	0	735.019	1	1	49.1849	38.9259
DATA	2455	29	75	0	0	A_64_P151525	A_64_P151525	5467.58	384.615	3.097321e+001	4.981372e+000	88.5	39.5	1.077814e+001	0	0	0	0	0	0	25.297	1	1	50.1463	41.3438
DATA	2456	29	76	0	0	A_43_P19276	ENSRNOT00000039523	5492.43	384.716	3.147875e+002	3.172111e+001	321	37	6.368301e+000	0	0	0	0	0	0	256.289	1	1	46.5243	38.65
DATA	2457	29	77	0	0	A_44_P529811	NM_001107657	5517.5	385	1.784559e+001	4.311605e+000	75	37	6.915069e+000	0	0	0	0	0	0	14.4876	1	0	54.1152	37.5455
DATA	2458	29	78	0	0	A_64_P104640	A_64_P104640	5543.31	385.014	1.200202e+004	1.200208e+003	9871	39	7.352858e+000	0	0	0	0	0	0	9717.81	1	1	47.2035	40.75
DATA	2459	29	79	0	0	A_64_P003234	NM_001109048	5568.5	385	3.546390e+001	5.304117e+000	89	48	1.032644e+001	0	0	0	0	0	0	28.6502	1	1	54.1152	48.3462
DATA	2460	29	80	0	0	A_64_P097158	NM_001000875	5594	385	3.966387e+000	3.951672e+000	61	43	1.049666e+001	0	0	0	0	0	0	-0.43726	0	0	54.9904	45.4138
DATA	2461	29	81	0	0	A_64_P141814	NM_001134629	5619.6	384.5	1.138463e+002	1.205296e+001	153	41	7.004868e+000	0	0	0	0	0	0	91.6571	1	1	46.5243	39.4545
DATA	2462	29	82	0	0	A_42_P463602	NM_001107592	5644.5	385	3.976428e+000	3.961675e+000	58	37	9.693177e+000	0	0	0	1	0	0	-3.74101	0	0	54.1152	38.5714
DATA	2463	29	83	0	0	A_64_P083366	NM_001077643	5670.16	384.897	7.760496e+003	7.760598e+002	6365	38	1.024049e+001	0	0	0	0	0	0	6237.92	1	1	46.5243	39.8571
DATA	2464	29	84	0	0	A_44_P121039	NM_172008	5695.6	384.861	3.357007e+002	3.380338e+001	341	39.5	8.453233e+000	0	0	0	0	0	0	269.802	1	1	48.5334	39.5
DATA	2465	29	85	66	1	DarkCorner	DarkCorner	5720.91	385.065	3.977853e+000	3.963094e+000	55.5	37	8.554190e+000	0	0	0	0	0	0	-4.2563	0	0	65	36.7838
DATA	2466	30	1	66	1	DarkCorner	DarkCorner	3600.5	390.722	3.442700e+000	3.429928e+000	59	36	7.452860e+000	0	0	0	0	0	0	-2.22736	0	0	52.9257	37.1707
DATA	2467	30	2	0	0	A_42_P687443	NM_020100	3626	390.545	7.403872e+001	8.154648e+000	128	41	1.160606e+001	0	0	0	0	0	0	69.0272	1	1	65	40.5938
DATA	2468	30	3	0	0	A_42_P563382	ENSRNOT00000055321	3651.24	390.634	1.257665e+003	1.258126e+002	1219	39	8.024819e+000	0	0	0	0	0	0	1176.66	1	1	47.5395	40.0909
DATA	2469	30	4	0	0	A_42_P667100	NM_001013932	3676.38	390.444	8.197571e+002	8.204594e+001	816.5	40.5	7.353561e+000	0	0	0	0	0	0	769.59	1	1	48.2044	40.5294
DATA	2470	30	5	0	0	A_42_P553319	TC597248	3702.13	390.794	6.087703e+001	6.964200e+000	117	40	6.641810e+000	0	0	0	0	0	0	57.3511	1	1	46.1809	40.3636
DATA	2471	30	6	0	0	A_64_P151358	NM_181695	3727.65	390.704	1.821610e+001	3.831668e+000	78	41	7.713897e+000	0	0	0	0	0	0	17.2188	1	1	51.0895	40.7143
DATA	2472	30	7	0	0	A_44_P196743	ENSRNOT00000007795	3753	390.545	3.372555e+000	3.360042e+000	54	41	4.551697e+000	0	0	0	0	0	0	-6.73423	0	0	65	41.2222
DATA	2474	30	9	0	0	A_64_P127111	NM_001106004	3803.53	390.778	5.384062e+003	5.384166e+002	5100.5	39.5	7.793295e+000	0	0	0	0	0	0	5137.59	1	1	47.8731	40.9286
DATA	2475	30	10	0	0	A_42_P470775	NM_001025126	3828.75	390.644	1.112068e+003	1.112567e+002	1120.5	37	7.132893e+000	0	0	0	0	0	0	1064.26	1	1	48.5334	38.5333
DATA	2476	30	11	0	0	A_44_P472855	NM_001000961	3854.13	390.543	8.909399e+001	9.507951e+000	146	39	8.815834e+000	0	0	0	0	0	0	85.5036	1	1	47.5395	39.4762
DATA	2477	30	12	0	0	A_64_P080682	NM_001109652	3879.91	390.614	7.958625e+000	3.405483e+000	69	38	5.873599e+000	0	0	0	0	0	0	7.65871	1	0	57.259	38.9714
DATA	2478	30	13	0	0	A_42_P727368	NM_001025693	3904.87	391.145	5.383375e+001	6.315833e+000	114.5	40	8.590301e+000	0	0	0	0	0	0	51.9353	1	1	45.4864	38.9714
DATA	2479	30	14	0	0	A_64_P034427	A_64_P034427	3930.17	391	1.529459e+003	1.529814e+002	1539	44	6.708118e+000	0	0	0	0	0	0	1479.01	1	1	46.8651	42.6333
DATA	2480	30	15	0	0	A_64_P042871	A_64_P042871	3956.09	390.935	3.216738e+002	3.233495e+001	372	41	7.185247e+000	0	0	0	0	0	0	311.767	1	1	54.4085	40.9722
DATA	2481	30	16	0	0	A_64_P152617	NM_001105747	3981.5	391	1.304337e+001	3.530703e+000	77	40.5	7.766553e+000	0	0	0	0	0	0	12.6675	1	0	54.1152	41.2895
DATA	2482	30	17	0	0	A_44_P468879	NM_001007798	4006.8	391.101	1.403744e+001	3.563015e+000	77	39	8.426150e+000	0	0	0	0	0	0	13.6584	1	0	46.5243	38
DATA	2483	30	18	0	0	A_44_P252976	NM_001012071	4032.09	391.104	9.850310e+001	1.037870e+001	154.5	39	6.650864e+000	0	0	0	0	0	0	96.0036	1	1	46.8651	39.6552
DATA	2484	30	19	0	0	A_64_P014080	NM_022189	4057.32	391.317	6.960697e+000	3.337878e+000	69	43	7.986347e+000	0	0	0	0	0	0	6.79419	1	0	43.7019	42.1786
DATA	2485	30	20	0	0	A_44_P204789	NM_001025684	4083	391	4.299114e+002	4.311458e+001	493.5	39	7.112329e+000	0	0	0	0	0	0	420.173	1	1	54.9904	38.9091
DATA	2486	30	21	0	0	A_64_P030373	NM_001127319	4108.5	391	2.290875e+001	3.981714e+000	84	43	8.299879e+000	0	0	0	0	0	0	22.4144	1	1	54.1152	41.5128
DATA	2487	30	22	0	0	A_42_P558703	NM_001106810	4133.61	391.027	2.750843e+002	2.770020e+001	333	39	8.785929e+000	0	0	0	0	0	0	269.386	1	1	49.1849	41.0313
DATA	2488	30	23	0	0	A_44_P241190	NM_001013199	4159	391.203	4.546078e+002	4.557691e+001	509	41	1.043773e+001	0	0	0	0	0	0	445.496	1	1	46.8651	42.7097
DATA	2489	30	24	0	0	A_42_P539095	XM_001081794	4184.22	391.042	6.000072e+002	6.008868e+001	641.5	41	1.036707e+001	0	0	0	0	0	0	588.252	1	1	47.2035	43
DATA	2490	30	25	0	0	A_64_P010905	ENSRNOT00000057216	4210.09	391.386	5.953733e+001	6.782644e+000	123	43	9.460244e+000	0	0	0	0	0	0	58.3866	1	1	57.259	42.9394
DATA	2491	30	26	0	0	A_44_P500660	NM_001007645	4235.03	390.723	2.101346e+002	2.126318e+001	276	43	8.977750e+000	0	0	0	0	0	0	206.075	1	1	45.4864	43
DATA	2492	30	27	0	0	A_64_P056436	A_64_P056436	4260.87	390.855	1.628712e+002	1.660817e+001	224	47	9.311807e+000	0	0	0	0	0	0	159.695	1	1	45.4864	46.122
DATA	2493	30	28	0	0	A_42_P773816	NM_017079	4285.77	391.127	9.193357e+001	9.751264e+000	156.5	40	7.343190e+000	0	0	0	0	0	0	90.1054	1	1	47.2035	38.775
DATA	2494	30	29	0	0	A_64_P138604	NM_001009967	4311.58	391.427	2.802566e+004	2.802568e+003	26758.5	44	9.837388e+000	0	0	0	0	0	0	27451.1	1	1	57.5363	43.25
DATA	2495	30	30	0	0	A_42_P705302	NM_001107361	4336.74	391.222	4.158540e+003	4.158667e+002	4075.5	40	1.231409e+001	0	0	0	0	0	0	4069.79	1	1	47.5395	45.4667
DATA	2496	30	31	0	0	A_64_P027259	NM_001191656	4362.2	391.28	1.565113e+004	1.565117e+003	15530	39	4.650448e+000	0	0	0	0	0	0	15300.6	1	1	49.1849	39.72
DATA	2497	30	32	0	0	A_44_P288333	ENSRNOT00000006659	4387.48	391.362	1.545777e+002	1.579854e+001	221	40	8.435347e+000	0	0	0	0	0	0	150.92	1	1	47.5395	41.7647
DATA	2498	30	33	0	0	A_42_P618217	NM_130752	4413	390.915	5.619148e+001	6.500706e+000	119	39	5.825417e+000	0	0	0	0	0	0	54.7769	1	1	44.0646	40.5
DATA	2499	30	34	0	0	A_64_P151587	A_64_P151587	4438.58	391.427	3.286571e+000	3.276435e+000	64	41	9.063653e+000	0	0	0	0	0	0	1.12976	0	0	57.5363	41.5385
DATA	2500	30	35	0	0	A_42_P771107	NM_001108217	4464	391.455	2.958905e+002	2.977038e+001	348	43	8.664619e+000	0	0	0	0	0	0	287.375	1	1	55.8519	43.5714
DATA	2501	30	36	0	0	A_42_P689013	NM_053800	4489.08	391.167	6.869328e+003	6.869407e+002	6520	43	9.561295e+000	0	0	0	0	0	0	6657.17	1	1	46.8651	43.0513
DATA	2502	30	37	0	0	A_64_P155334	NM_001100945	4514.38	391.553	1.300567e+003	1.300984e+002	1284.5	40	9.836543e+000	0	0	0	0	0	0	1257.42	1	1	49.8279	40.8485
DATA	2503	30	38	0	0	A_64_P049007	A_64_P049007	4539.99	391.779	2.883179e+001	4.385384e+000	90	39	7.255732e+000	0	0	0	0	0	0	27.8025	1	1	46.1809	38.4865
DATA	2504	30	39	0	0	A_44_P351461	ENSRNOT00000027179	4565.5	391.5	3.494764e+001	4.816061e+000	96	36.5	7.818027e+000	0	0	0	0	0	0	33.6044	1	1	57.5363	37.8077
DATA	2505	30	40	0	0	A_44_P604267	NM_022933	4590.59	391.329	2.641544e+002	2.662372e+001	326	39	5.761895e+000	0	0	0	0	0	0	253.244	1	1	48.5334	40.2593
DATA	2506	30	41	0	0	A_64_P070475	XM_001061514	4616.5	391.5	3.346975e+000	3.334558e+000	64	40	7.536993e+000	0	0	0	0	0	0	-1.69616	0	0	57.5363	40.037
DATA	2507	30	42	0	0	A_64_P119963	A_64_P119963	4641.5	391.043	5.834689e+002	5.844274e+001	621.5	40	9.251126e+000	0	0	0	0	0	0	555.666	1	1	47.8731	41.4
DATA	2508	30	43	0	0	A_42_P658562	NM_001134416	4667.11	391.5	1.997326e+002	2.025355e+001	257.5	38.5	9.866353e+000	0	0	0	0	0	0	189.533	1	1	65	40.5588
DATA	2509	30	44	0	0	A_64_P116830	A_64_P116830	4692.5	391.5	9.190677e+001	9.789236e+000	149	42.5	1.142003e+001	0	0	0	0	0	0	86.8856	1	1	57.5363	44.3529
DATA	2510	30	45	0	0	A_64_P048531	ENSRNOT00000019473	4717.89	391.5	7.388020e+001	8.126087e+000	132	39	1.140513e+001	0	0	0	0	0	0	69.5693	1	1	65	43.6667
DATA	2511	30	46	0	0	A_64_P122716	NM_139331	4743.42	391.573	8.781512e+000	3.509467e+000	72	43	9.294697e+000	0	0	0	0	0	0	8.2351	1	0	65	44.5161
DATA	2512	30	47	0	0	A_64_P077323	NM_201992	4768.58	391.573	1.402806e+001	3.689305e+000	78	46.5	1.039741e+001	0	0	0	0	0	0	13.0998	1	0	57.5363	46.8846
DATA	2513	30	48	0	0	A_42_P569711	NM_001108977	4793.46	391.417	1.383367e+002	1.425183e+001	189.5	42	7.878388e+000	0	0	0	0	0	0	128.625	1	1	48.2044	41.6579
DATA	2514	30	49	0	0	A_42_P474100	NM_001191820	4819.06	391.382	2.755748e+003	2.755963e+002	2546	38	8.906380e+000	0	0	0	0	0	0	2550.56	1	1	46.1809	39.9737
DATA	2515	30	50	0	0	A_64_P026404	A_64_P026404	4844.72	391.328	3.471944e+000	3.459063e+000	59	40	1.066874e+001	0	0	0	0	0	0	-5.02089	0	0	44.7812	41.6829
DATA	2516	30	51	0	0	A_64_P026581	ENSRNOT00000029099	4869.89	391.5	2.930463e+003	2.930669e+002	2687	37	8.253380e+000	0	0	0	0	0	0	2686.7	1	1	47.8731	38.5806
DATA	2517	30	52	0	0	A_64_P043624	NM_133565	4895.5	391.5	1.644619e+003	1.644990e+002	1614	35	7.678901e+000	0	0	0	0	0	0	1500.37	1	1	49.1849	36.4138
DATA	2518	30	53	0	0	A_44_P417429	NM_001011983	4920.97	391.658	8.174527e+002	8.182060e+001	787	35	7.282030e+000	0	0	0	0	0	0	742.031	1	1	48.8603	36.8065
DATA	2519	30	54	0	0	A_64_P007574	ENSRNOT00000028681	4946.31	391.662	1.219484e+004	1.219489e+003	10863	41	6.861536e+000	0	0	0	0	0	0	11013.6	1	1	48.5334	39.9143
DATA	2520	30	55	0	0	A_42_P529690	NM_001173510	4971.44	391.74	1.131577e+004	1.131582e+003	9777.5	39.5	6.668070e+000	0	0	0	0	0	0	10167.6	1	1	49.5074	39.6
DATA	2521	30	56	0	0	A_42_P505070	TC624062	4996.72	391.84	2.681712e+003	2.681949e+002	2420	37	7.322936e+000	0	0	0	1	0	0	2397.13	1	1	49.1849	37.4444
DATA	2522	30	57	0	0	A_42_P504653	NM_017143	5022.36	391.719	2.638252e+002	2.662481e+001	313	38	9.292880e+000	0	0	0	0	0	0	234.573	1	1	44.7812	39.1026
DATA	2523	30	58	0	0	A_64_P017891	A_64_P017891	5048.29	391.899	3.616621e+000	3.606002e+000	64	39	6.522385e+000	0	0	0	0	0	0	1.25621	0	0	45.835	37.7826
DATA	2524	30	59	0	0	A_42_P642724	NM_001107585	5073	391.797	1.655739e+003	1.656135e+002	1470	43	9.590764e+000	0	0	0	0	0	0	1456.62	1	1	46.8651	42.5
DATA	2525	30	60	0	0	A_42_P780943	NM_001011906	5098.57	391.9	4.694924e+002	4.709025e+001	472	46	8.388981e+000	0	0	0	0	0	0	410.818	1	1	47.5395	45.875
DATA	2526	30	61	0	0	A_44_P482325	NM_145669	5123.76	391.987	4.691969e+002	4.706229e+001	471	44	1.115039e+001	0	0	0	0	0	0	408.395	1	1	49.1849	44.2581
DATA	2527	30	62	0	0	A_42_P716750	NM_001024757	5149.19	391.808	1.989288e+002	2.023047e+001	230	43	8.558967e+000	0	0	0	0	0	0	172.229	1	1	47.8731	41.4516
DATA	2528	30	63	0	0	A_64_P009565	NM_001191823	5174.75	391.93	6.206513e+001	7.225667e+000	119	44	8.540049e+000	0	0	0	0	0	0	53.4509	1	1	47.2035	44.1081
DATA	2529	30	64	0	0	A_42_P495969	NM_012824	5200.34	391.909	5.719436e+003	5.719557e+002	5000	43	9.766109e+000	0	0	0	1	0	0	4899.77	1	1	49.1849	42.1081
DATA	2530	30	65	0	0	A_64_P154671	ENSRNOT00000024704	5225.79	391.773	8.129937e+001	8.948405e+000	134	43	9.588367e+000	0	0	0	0	0	0	69.289	1	1	45.835	44.8333
DATA	2531	30	66	0	0	A_44_P111337	NM_001108724	5250.87	391.768	1.012522e+003	1.013219e+002	927	43	7.244329e+000	0	0	0	0	0	0	858.642	1	1	46.1809	43.8621
DATA	2532	30	67	0	0	A_42_P665627	NM_023095	5276.41	391.831	6.144180e+001	7.211826e+000	116	40	8.197176e+000	0	0	0	0	0	0	51.8457	1	1	47.5395	38.973
DATA	2533	30	68	0	0	A_44_P447585	NM_001166676	5302.13	392.028	9.077475e+000	3.901651e+000	69	42	1.029547e+001	0	0	0	0	0	0	7.62257	1	0	46.8651	39.9429
DATA	2534	30	69	0	0	A_42_P463754	NM_030994	5327.5	392	4.163726e+002	4.181143e+001	406.5	42	1.021724e+001	0	0	0	0	0	0	348.007	1	1	54.1152	39.7273
DATA	2535	30	70	0	0	A_42_P644717	NM_001108927	5352.52	392.329	9.137810e+000	3.936739e+000	70	37	8.241452e+000	0	0	0	0	0	0	7.60383	1	0	48.8603	36.8077
DATA	2536	30	71	0	0	A_42_P546539	NM_001135801	5377.76	392	3.666025e+002	3.686143e+001	370	41	7.010980e+000	0	0	0	1	0	0	303.74	1	1	46.8651	38.6667
DATA	2537	30	72	0	0	A_42_P818297	XM_001073988	5403.31	392.234	8.613368e+002	8.622021e+001	749	39.5	5.995920e+000	0	0	0	0	0	0	710.703	1	1	49.8279	40.1071
DATA	2538	30	73	0	0	A_64_P047416	NM_001109501	5428.89	391.742	1.746219e+002	1.788744e+001	209	36	1.007539e+001	0	0	0	0	0	0	143.511	1	1	44.7812	37.4722
DATA	2539	30	74	0	0	A_43_P18389	XM_002726292	5454.57	392.13	2.215106e+001	4.477611e+000	80	37	9.031281e+000	0	0	0	0	0	0	18.1384	1	1	47.2035	38.2759
DATA	2540	30	75	0	0	A_64_P044276	NM_001105946	5479.77	391.727	1.681862e+003	1.682315e+002	1437	36.5	9.696815e+000	0	0	0	0	0	0	1372.52	1	1	45.4864	39.8125
DATA	2541	30	76	0	0	A_64_P059475	ENSRNOT00000029976	5505	392.455	4.405658e+000	3.940928e+000	65	37	9.165536e+000	0	0	0	0	0	0	3.58463	1	0	55.8519	39.8438
DATA	2542	30	77	0	0	A_64_P005496	A_64_P005496	5530.42	392.427	4.104977e+000	3.948514e+000	63	38	7.447632e+000	0	0	0	0	0	0	3.33071	1	0	57.5363	37.6571
DATA	2544	30	79	0	0	A_42_P739860	NM_133578	5581.42	392.427	1.198392e+003	1.199041e+002	977.5	48	9.602944e+000	0	0	0	0	0	0	967.972	1	1	57.5363	47.7037
DATA	2545	30	80	0	0	A_42_P681251	NM_030844	5606.43	392.239	1.629149e+003	1.629628e+002	1372.5	43	7.684099e+000	0	0	0	0	0	0	1313.7	1	1	46.5243	43.1143
DATA	2546	30	81	0	0	A_42_P567793	NM_001107668	5632.09	391.672	1.267499e+003	1.268117e+002	1086.5	39	7.928365e+000	0	0	0	0	0	0	1020.7	1	1	45.1352	39.25
DATA	2547	30	82	0	0	A_64_P041662	NM_182843	5657.44	392.26	2.467794e+002	2.499363e+001	257	38	1.037297e+001	0	0	0	0	0	0	198.575	1	1	49.5074	38.7931
DATA	2548	30	83	0	0	A_42_P534679	NM_001134974	5682.73	392.137	1.310536e+003	1.311135e+002	1079	42	1.266750e+001	0	0	0	0	0	0	1054.14	1	1	48.2044	41.5862
DATA	2549	30	84	66	1	DarkCorner	DarkCorner	5708.33	392.5	3.975526e+000	3.960776e+000	54	39	8.408401e+000	0	0	0	0	0	0	-5.51977	0	0	57.5363	39.4865
DATA	2550	30	85	66	1	DarkCorner	DarkCorner	5733.49	392.317	3.973100e+000	3.958360e+000	58	34	8.242543e+000	0	0	0	0	0	0	-1.91991	0	0	51.7088	34.9744
DATA	2551	31	1	66	1	DarkCorner	DarkCorner	3588.24	397.559	3.447001e+000	3.434213e+000	62	35	8.357118e+000	0	0	0	0	0	0	-0.682423	0	0	46.1809	36.0086
DATA	2552	31	2	0	0	A_42_P576549	NM_001106490	3613.2	397.533	5.950274e+000	3.473618e+000	67	41	7.724142e+000	0	0	0	1	0	0	5.54016	1	0	48.2044	39.9355
DATA	2553	31	3	0	0	A_42_P542638	NM_001012202	3638.41	397.908	2.659611e+002	2.681385e+001	305.5	38.5	8.944920e+000	0	0	0	0	0	0	248.503	1	1	49.1849	39.4412
DATA	2554	31	4	0	0	A_42_P765736	NM_001025670	3663.82	397.732	2.673585e+001	4.324052e+000	87	38.5	7.467637e+000	0	0	0	0	0	0	25.0678	1	1	46.8651	39.1471
DATA	2555	31	5	0	0	A_44_P372461	NM_001170708	3688.9	398.014	4.848793e+002	4.860608e+001	527	40	5.807413e+000	0	0	0	0	0	0	456.177	1	1	46.8651	39.8974
DATA	2556	31	6	0	0	A_64_P070554	XM_001059856	3714.41	398.127	2.909136e+001	4.456079e+000	89	40.5	7.388244e+000	0	0	0	0	0	0	27.4622	1	1	47.5395	39.8846
DATA	2557	31	7	0	0	A_64_P030859	ENSRNOT00000045252	3739.87	398.029	6.388768e+003	6.388857e+002	6163.5	40.5	6.599120e+000	0	0	0	0	0	0	6050.86	1	1	46.8651	40
DATA	2558	31	8	0	0	A_64_P079260	NM_001005546	3765.41	397.908	1.783470e+003	1.783785e+002	1750.5	40.5	7.076288e+000	0	0	0	0	0	0	1694.57	1	1	49.1849	40.9231
DATA	2559	31	9	0	0	A_64_P149846	A_64_P149846	3790.78	397.866	6.469240e+003	6.469327e+002	6276.5	39	8.249347e+000	0	0	0	0	0	0	6165.83	1	1	46.1809	40.1379
DATA	2560	31	10	0	0	A_64_P120624	NM_031634	3816.36	397.641	7.890159e+000	3.425298e+000	70	42	7.156661e+000	0	0	0	0	0	0	7.5427	1	0	45.1352	41.9697
DATA	2561	31	11	0	0	A_64_P158020	NM_001008909	3841.43	397.9	2.975145e+001	4.460787e+000	91	39	8.028176e+000	0	0	0	0	0	0	28.5223	1	1	47.5395	39
DATA	2562	31	12	0	0	A_64_P116606	NM_153724	3867	397.806	4.251231e+001	5.390684e+000	101	38	5.856997e+000	0	0	0	0	0	0	40.8682	1	1	46.1809	38.5789
DATA	2563	31	13	0	0	A_44_P532436	ENSRNOT00000006946	3892.5	398.352	5.439733e+000	3.350341e+000	68	39	6.298213e+000	0	0	0	0	0	0	5.24313	1	0	65	39.1034
DATA	2564	31	14	0	0	A_64_P027545	NM_023095	3918.09	398.386	1.108966e+002	1.156960e+001	164.5	41.5	7.232510e+000	0	0	0	0	0	0	107.152	1	1	57.259	39.9667
DATA	2565	31	15	0	0	A_64_P076705	NM_017088	3943.5	398.352	5.860494e+004	5.860495e+003	56152.5	41	7.031897e+000	0	0	0	0	0	0	56755.8	1	1	57.5363	40.8125
DATA	2566	31	16	0	0	A_44_P238642	NM_001127201	3968.31	398.338	2.151385e+003	2.151635e+002	2098	39	7.887916e+000	0	0	0	0	0	0	2087.83	1	1	48.5334	39.1724
DATA	2567	31	17	0	0	A_64_P037249	NM_001105802	3994.2	398.067	3.022690e+001	4.458120e+000	89.5	39.5	6.653641e+000	0	0	0	0	0	0	29.392	1	1	48.2044	39.8235
DATA	2568	31	18	0	0	A_64_P061524	NM_172064	4019.47	398.177	2.419273e+002	2.441288e+001	302	41	8.664377e+000	0	0	0	0	0	0	235.66	1	1	50.1463	41
DATA	2569	31	19	0	0	A_42_P536564	NM_001008344	4044.54	398.122	1.534103e+003	1.534451e+002	1537	38	8.079958e+000	0	0	0	0	0	0	1496.7	1	1	48.8603	40
DATA	2570	31	20	0	0	A_64_P062433	NM_001135804	4070.06	398.232	4.011857e+002	4.025092e+001	449	39	8.659633e+000	0	0	0	0	0	0	391.955	1	1	46.5243	39.4516
DATA	2571	31	21	0	0	A_42_P665509	NM_053777	4095.58	398.427	2.226812e+004	2.226814e+003	21589.5	41	7.722091e+000	0	0	0	0	0	0	21782	1	1	57.5363	39.5455
DATA	2572	31	22	0	0	A_44_P250144	NM_001001373	4121.33	398.5	3.266343e+000	3.254579e+000	63	44.5	9.988501e+000	0	0	0	0	0	0	0.470406	0	0	65	43.1875
DATA	2573	31	23	0	0	A_42_P746838	NM_001024286	4146.5	398.5	4.823193e+000	3.287273e+000	67	41	9.905902e+000	0	0	0	1	0	0	4.72634	1	0	65	42.2424
DATA	2574	31	24	0	0	A_44_P210852	NM_001034187	4171.89	398.5	4.226466e+001	5.331453e+000	104.5	37	7.848002e+000	0	0	0	0	0	0	41.4398	1	1	56.9804	38.6552
DATA	2575	31	25	0	0	A_64_P019390	A_64_P019390	4197.42	398.427	1.609521e+001	3.625512e+000	78	40	6.927278e+000	0	0	0	0	0	0	15.7868	1	0	57.5363	39.75
DATA	2576	31	26	0	0	A_64_P134709	NM_001105760	4222.3	398.357	6.999465e+001	7.716432e+000	136	36.5	7.047972e+000	0	0	0	0	0	0	68.6629	1	1	47.8731	37.75
DATA	2578	31	28	0	0	A_64_P028117	NM_001000372	4273.5	398.5	1.908998e+001	3.768654e+000	79	42	8.656542e+000	0	0	0	0	0	0	18.72	1	1	57.5363	44.9167
DATA	2579	31	29	0	0	A_44_P391517	NM_001034144	4298.89	398.5	1.522373e+002	1.556700e+001	210.5	40	7.971610e+000	0	0	0	0	0	0	149.21	1	1	65	40.0769
DATA	2580	31	30	0	0	A_42_P743682	NM_133599	4324.42	398.573	3.526491e+001	4.798043e+000	99	45	9.742555e+000	0	0	0	0	0	0	34.5379	1	1	65	45.9259
DATA	2581	31	31	0	0	A_64_P163075	NM_001109321	4349.58	398.573	1.283492e+001	3.500378e+000	77	39	4.189935e+000	0	0	0	0	0	0	12.5583	1	0	65	39
DATA	2582	31	32	0	0	A_44_P393422	NM_001013188	4374.49	398.553	8.490244e+002	8.496502e+001	900	41.5	8.242054e+000	0	0	0	0	0	0	829.765	1	1	49.5074	41.5625
DATA	2583	31	33	0	0	A_44_P288982	NM_001107913	4400.04	398.125	5.174080e+001	6.118131e+000	114	44	7.814348e+000	0	0	0	0	0	0	50.4948	1	1	46.8651	43.7241
DATA	2584	31	34	0	0	A_64_P009788	NM_001191099	4425.64	398.521	1.115400e+001	3.455313e+000	74	42	6.911688e+000	0	0	0	0	0	0	10.8677	1	0	48.5334	42
DATA	2585	31	35	0	0	A_42_P764228	NM_031707	4451.11	398.352	1.927628e+003	1.927907e+002	1913	42	1.106404e+001	0	0	0	0	0	0	1874.67	1	1	47.8731	42.4615
DATA	2586	31	36	0	0	A_64_P161621	NM_001101015	4476.58	398.573	1.730964e+002	1.761825e+001	234	44	8.599200e+000	0	0	0	0	0	0	167.994	1	1	57.5363	45.2903
DATA	2587	31	37	0	0	A_42_P763522	NM_001013980	4501.93	398.575	1.324648e+003	1.325057e+002	1356	40	9.338060e+000	0	0	0	0	0	0	1282.68	1	1	48.5334	41.075
DATA	2588	31	38	0	0	A_64_P029935	NM_001109299	4527.5	398.695	4.330761e+002	4.343308e+001	482	39	8.908414e+000	0	0	0	0	0	0	418.306	1	1	51.7088	40.2121
DATA	2589	31	39	0	0	A_64_P045053	A_64_P045053	4552.94	398.789	2.119844e+002	2.145496e+001	261.5	40	8.666082e+000	0	0	0	0	0	0	204.202	1	1	46.8651	39.6207
DATA	2590	31	40	0	0	A_42_P540920	NM_001135045	4577.75	398.974	1.475005e+003	1.475378e+002	1468	38	6.950300e+000	0	0	0	0	0	0	1416.85	1	1	49.1849	39.16
DATA	2591	31	41	0	0	A_64_P055323	NM_001191930	4603.43	398.478	1.734663e+002	1.766294e+001	225	45	7.794229e+000	0	0	0	0	0	0	166.101	1	1	46.8651	45
DATA	2592	31	42	0	0	A_64_P047162	NM_153472	4628.69	398.662	2.391791e+003	2.392024e+002	2274.5	46	1.699046e+001	0	0	0	0	0	0	2282.77	1	1	48.5334	48.3043
DATA	2593	31	43	0	0	A_64_P279594	NM_001170476	4654.25	398.97	1.818835e+001	3.812130e+000	82	41	1.016393e+001	0	0	0	0	0	0	17.2988	1	1	46.1809	42.25
DATA	2594	31	44	0	0	A_42_P665509	NM_053777	4679.63	398.64	2.253980e+004	2.253983e+003	21372.5	42	9.346280e+000	0	0	0	0	0	0	21358.7	1	1	48.8603	43
DATA	2595	31	45	0	0	A_64_P106638	NM_001108198	4705.42	398.573	3.634188e+001	4.960155e+000	100.5	45	9.634127e+000	0	0	0	0	0	0	34.3033	1	1	65	45.8235
DATA	2596	31	46	0	0	A_64_P141245	NM_001105920	4730.2	399.029	7.349913e+002	7.357722e+001	764	42.5	1.025468e+001	0	0	0	0	0	0	691.072	1	1	46.8651	43.9615
DATA	2597	31	47	0	0	A_42_P503739	FQ231471	4755.72	398.905	6.858999e+003	6.859083e+002	6228.5	46.5	8.802056e+000	0	0	0	0	0	0	6422.14	1	1	48.8603	45.0714
DATA	2598	31	48	0	0	A_44_P282433	NM_033230	4781.09	399.104	3.327831e+002	3.345336e+001	373	42	9.193046e+000	0	0	0	0	0	0	310.25	1	1	46.8651	43.5625
DATA	2599	31	49	0	0	A_42_P585750	NM_001202463	4806.5	399	1.123377e+001	3.612275e+000	73.5	41.5	8.510311e+000	0	0	0	0	0	0	10.4264	1	0	54.1152	41.5556
DATA	2600	31	50	0	0	A_42_P523517	FQ229104	4831.94	398.969	3.588182e+003	3.588347e+002	3294	39.5	9.846883e+000	0	0	0	0	0	0	3314.97	1	1	45.835	41.1944
DATA	2601	31	51	0	0	A_64_P126190	NM_001113789	4857.53	399.028	7.104676e+000	3.537536e+000	69	43	9.427596e+000	0	0	0	0	0	0	6.53257	1	0	48.5334	41.7097
DATA	2602	31	52	0	0	A_42_P549675	NM_080577	4882.72	398.905	2.122775e+003	2.123061e+002	1916.5	39	1.038036e+001	0	0	0	1	0	0	1942.48	1	1	48.8603	41.5758
DATA	2603	31	53	0	0	A_42_P535644	NM_024400	4908.24	399	2.037378e+002	2.067213e+001	241	37	9.143732e+000	0	0	0	1	0	0	185.511	1	1	46.8651	38.2941
DATA	2604	31	54	0	0	A_64_P050233	XM_345239	4933.5	399	1.107680e+002	1.162175e+001	163	38.5	8.748136e+000	0	0	0	0	0	0	100.354	1	1	65	41.2333
DATA	2605	31	55	0	0	A_64_P121575	NM_001013144	4959.39	399.069	4.266614e+001	5.541048e+000	102	42	7.424603e+000	0	0	0	0	0	0	38.4541	1	1	53.8203	42.4839
DATA	2606	31	56	0	0	A_64_P018263	NM_012728	4984.06	399.043	2.623448e+002	2.647402e+001	303	42	1.023242e+001	0	0	0	0	0	0	235.258	1	1	46.8651	43.0357
DATA	2607	31	57	0	0	A_64_P164682	TC600307	5009.79	398.806	3.934375e+003	3.934537e+002	3548	38	9.371700e+000	0	0	0	0	0	0	3509.39	1	1	47.5395	40.4091
DATA	2608	31	58	0	0	A_44_P1045612	NM_172317	5035.36	398.746	1.759284e+002	1.795566e+001	225.5	40	1.056568e+001	0	0	0	0	0	0	156.091	1	1	46.1809	42.3143
DATA	2609	31	59	0	0	A_42_P529514	NM_001008308	5060.45	398.758	2.524416e+002	2.550101e+001	283.5	39.5	8.556509e+000	0	0	0	0	0	0	222.805	1	1	43.3362	41.4231
DATA	2610	31	60	0	0	A_44_P870348	NM_001107522	5086.09	399.386	1.320495e+002	1.369468e+001	177	44	1.019024e+001	0	0	0	0	0	0	115.928	1	1	57.259	43.8182
DATA	2611	31	61	0	0	A_64_P108264	XM_223835	5111.5	399.352	4.930570e+001	6.133942e+000	108	43	1.024978e+001	0	0	0	0	0	0	43.0558	1	1	57.5363	45.5161
DATA	2612	31	62	0	0	A_42_P754784	CB328432	5136.56	399.027	3.921417e+003	3.921588e+002	3342	43	1.116724e+001	0	0	0	0	0	0	3406.33	1	1	48.5334	42.25
DATA	2613	31	63	0	0	A_64_P084525	NM_001101001	5162.19	399.233	9.491106e+002	9.498268e+001	864.5	41	7.897106e+000	0	0	0	0	0	0	820.075	1	1	48.2044	41.9167
DATA	2614	31	64	0	0	A_64_P378583	NM_001099516	5187.58	399.427	7.182238e+000	3.775995e+000	68.5	42	7.631824e+000	0	0	0	0	0	0	6.17349	1	0	57.5363	42.2432
DATA	2615	31	65	0	0	A_64_P154172	NM_001000557	5213	399.455	3.740168e+000	3.726292e+000	56.5	41	1.029598e+001	0	0	0	0	0	0	-6.23658	0	0	65	40.5882
DATA	2616	31	66	0	0	A_64_P074634	NM_001024287	5238.56	399.267	1.945898e+002	1.981617e+001	233	40	8.372727e+000	0	0	0	0	0	0	165.543	1	1	49.1849	42.9487
DATA	2617	31	67	1028	1	(+)E1A_r60_a22	E1A_r60_a22	5264.18	399.041	1.507223e+002	1.553524e+001	188	39	6.606858e+000	0	0	0	0	0	0	127.576	1	1	46.8651	40.0667
DATA	2618	31	68	0	0	A_43_P12780	NM_053350	5289.42	399.427	5.551630e+001	6.717812e+000	107	42	9.332823e+000	0	0	0	0	0	0	46.7655	1	1	57.5363	40.3889
DATA	2619	31	69	0	0	A_44_P442169	NM_001013034	5314.57	399.338	1.911595e+003	1.911973e+002	1634	38.5	1.068428e+001	0	0	0	0	0	0	1602.72	1	1	48.5334	39.0769
DATA	2620	31	70	0	0	A_64_P093894	A_64_P093894	5340	399.455	1.563519e+001	4.125680e+000	75	37	8.247645e+000	0	0	0	0	0	0	13.0489	1	0	55.8519	37.9032
DATA	2621	31	71	0	0	A_64_P073378	NM_001025287	5365.12	399.5	3.456243e+002	3.477451e+001	345	41	6.142380e+000	0	0	0	0	0	0	287.198	1	1	47.2035	39.8929
DATA	2622	31	72	0	0	A_64_P096076	A_64_P096076	5390.67	399.5	3.865282e+000	3.850942e+000	57.5	38.5	7.071068e+000	0	0	0	0	0	0	-5.75291	0	0	57.5363	38.5
DATA	2623	31	73	0	0	A_42_P471835	TC610276	5416.09	398.672	1.509000e+003	1.509496e+002	1265.5	38	7.875270e+000	0	0	0	0	0	0	1243.49	1	1	45.1352	37.675
DATA	2624	31	74	0	0	A_42_P767737	AY724480	5441.53	399.222	1.906905e+003	1.907300e+002	1622	33	8.643458e+000	0	0	0	0	0	0	1565.56	1	1	47.8731	34.931
DATA	2625	31	75	0	0	A_64_P016393	A_64_P016393	5467.06	399.519	2.566680e+003	2.566976e+002	2186	35	7.621000e+000	0	0	0	0	0	0	2099.87	1	1	49.5074	37.2813
DATA	2626	31	76	0	0	A_42_P803752	XM_580093	5492.34	399.441	1.277695e+001	4.110915e+000	70	37	7.419967e+000	0	0	0	0	0	0	10.4196	1	0	46.8651	39.4516
DATA	2627	31	77	0	0	A_42_P589025	NM_134363	5517.67	399.5	2.739451e+004	2.739454e+003	20994.5	37	6.753506e+000	0	0	0	0	0	0	22275.1	1	1	57.5363	37.8788
DATA	2628	31	78	0	0	A_64_P107938	NM_001000930	5543.33	399.5	7.263079e+000	3.995592e+000	66	41	6.901216e+000	0	0	0	0	0	0	5.89029	1	0	57.5363	42.3704
DATA	2629	31	79	0	0	A_64_P088817	A_64_P088817	5568.5	399.5	2.530426e+002	2.560882e+001	262.5	48.5	1.057173e+001	0	0	0	0	0	0	204.758	1	1	57.5363	49.1923
DATA	2630	31	80	0	0	A_64_P000579	A_64_P000579	5593.78	399.824	7.790956e+003	7.791056e+002	6408	47	8.341263e+000	0	0	0	0	0	0	6292.78	1	1	48.2044	45.92
DATA	2631	31	81	0	0	A_44_P570046	TC630334	5619.47	399.608	1.744717e+002	1.788894e+001	204	42	8.281078e+000	0	0	0	0	0	0	140.707	1	1	48.8603	43.2821
DATA	2632	31	82	0	0	A_44_P431629	NM_001106835	5644.54	399.471	6.842444e+001	7.903330e+000	117	39	9.654516e+000	0	0	0	0	0	0	55.1244	1	1	46.5243	39.125
DATA	2634	31	84	0	0	A_42_P485932	NM_001034927	5695.43	399.608	6.420639e+003	6.420761e+002	5093	42	1.065249e+001	0	0	0	1	0	0	5168.88	1	1	49.1849	40.3714
DATA	2635	31	85	66	1	DarkCorner	DarkCorner	5721	399.545	3.971331e+000	3.956597e+000	58	37	8.906206e+000	0	0	0	0	0	0	-3.54919	0	0	55.8519	37.25
DATA	2636	32	1	66	1	DarkCorner	DarkCorner	3599.92	405.25	3.439539e+000	3.426778e+000	55	36	7.119209e+000	0	0	0	0	0	0	-4.99367	0	0	44.4243	37.6078
DATA	2637	32	2	0	0	A_64_P048366	ENSRNOT00000059330	3625.76	405.2	1.238899e+003	1.239369e+002	1224	40	8.653733e+000	0	0	0	0	0	0	1156.11	1	1	46.8651	39.875
DATA	2638	32	3	0	0	A_44_P1058980	NM_001012036	3651	405.271	7.478268e+002	7.486006e+001	739	37	9.143579e+000	0	0	0	0	0	0	700.276	1	1	46.8651	38.4286
DATA	2639	32	4	0	0	A_64_P062562	ENSRNOT00000027655	3676.55	405.1	4.477828e+001	5.616961e+000	105	37	6.247845e+000	0	0	0	0	0	0	42.0758	1	1	43.3362	37.2105
DATA	2640	32	5	0	0	A_44_P490100	ENSRNOT00000043641	3702.33	405.5	1.507407e+001	3.700326e+000	78	40.5	5.725924e+000	0	0	0	0	0	0	14.2133	1	0	57.5363	39.8
DATA	2641	32	6	0	0	A_42_P473886	NM_001165922	3726.85	405.373	1.674875e+002	1.708415e+001	221.5	37	7.256935e+000	0	0	0	0	0	0	158.428	1	1	46.1809	37.9412
DATA	2642	32	7	0	0	A_64_P393339	ENSRNOT00000057753	3752.89	405.5	6.434811e+001	7.258051e+000	123.5	38	6.730330e+000	0	0	0	0	0	0	61.0697	1	1	56.9804	38.2121
DATA	2643	32	8	0	0	A_44_P461154	NM_053819	3778.06	405.382	2.122610e+002	2.148837e+001	265	37	6.178955e+000	0	0	0	0	0	0	202.072	1	1	46.1809	36.7778
DATA	2644	32	9	0	0	A_42_P701991	NM_001100671	3803.32	405.395	1.538343e+003	1.538705e+002	1490	41	8.635016e+000	0	0	0	0	0	0	1468.92	1	1	49.5074	41.2188
DATA	2645	32	10	1028	1	(+)E1A_r60_1	E1A_r60_1	3828.9	405.603	3.339548e+000	3.327161e+000	63	39	6.888357e+000	0	0	0	0	0	0	0.0399699	0	0	44.4243	39.871
DATA	2646	32	11	0	0	A_44_P541230	ENSRNOT00000010675	3854.23	405.714	7.170863e+002	7.178534e+001	751.5	39	6.702158e+000	0	0	0	0	0	0	688.667	1	1	47.2035	39.5676
DATA	2647	32	12	0	0	A_64_P004593	NM_001166761	3879.89	405.5	3.321356e+000	3.311228e+000	63	37.5	5.789084e+000	0	0	0	0	0	0	1.16084	0	0	56.9804	38.5278
DATA	2648	32	13	0	0	A_64_P018385	ENSRNOT00000063845	3905.42	405.573	3.312972e+000	3.300681e+000	59	42	6.409494e+000	0	0	0	0	0	0	-3.14464	0	0	65	40.7667
DATA	2649	32	14	0	0	A_64_P017590	NM_001000096	3930.58	405.573	3.305238e+000	3.292975e+000	53	40	7.951778e+000	0	0	0	0	0	0	-10.059	0	0	57.5363	39.6667
DATA	2650	32	15	0	0	A_42_P810118	XM_001075984	3956.11	405.5	3.104877e+002	3.122214e+001	351.5	40	8.146801e+000	0	0	0	0	0	0	301.103	1	1	56.9804	39.7037
DATA	2651	32	16	0	0	A_42_P772157	NM_017020	3980.81	405.533	4.756904e+002	4.768194e+001	522.5	39	9.304377e+000	0	0	0	0	0	0	462.226	1	1	49.5074	39
DATA	2652	32	17	0	0	A_42_P542809	NM_021671	4006.89	405.5	2.714285e+002	2.733947e+001	330.5	40.5	9.819284e+000	0	0	0	0	0	0	264.249	1	1	56.9804	41.0313
DATA	2653	32	18	0	0	A_42_P645352	NM_001126371	4032	405.271	1.518396e+003	1.518748e+002	1554	38.5	7.452809e+000	0	0	0	0	0	0	1480.67	1	1	46.8651	39.9375
DATA	2654	32	19	0	0	A_64_P106933	NM_001130493	4057.44	405.16	5.606445e+001	6.486736e+000	117.5	39	1.090819e+001	0	0	0	0	0	0	54.7526	1	1	49.5074	41.6667
DATA	2655	32	20	0	0	A_42_P614175	NM_033237	4083	405.545	6.367306e+002	6.375638e+001	676.5	41	6.479026e+000	0	0	0	0	0	0	622.651	1	1	55.8519	39.2778
DATA	2656	32	21	0	0	A_64_P147190	NM_031840	4108.06	406.031	1.225058e+003	1.225490e+002	1259.5	44	8.590710e+000	0	0	0	0	0	0	1199.29	1	1	46.8651	43.7568
DATA	2657	32	22	0	0	A_43_P11268	NM_031762	4133.42	405.878	3.116354e+003	3.116523e+002	3120	45	1.010206e+001	0	0	0	0	0	0	3053.49	1	1	48.5334	44.4194
DATA	2658	32	23	0	0	A_64_P022215	A_64_P022215	4159.17	406.121	9.081418e+001	9.645351e+000	153.5	40.5	1.048047e+001	0	0	0	0	0	0	89.0448	1	1	46.1809	42.2333
DATA	2659	32	24	0	0	A_64_P001080	NM_001109379	4183.74	406.413	3.378766e+001	4.686874e+000	97	38	6.727843e+000	0	0	0	0	0	0	33.145	1	1	39.0882	38.1714
DATA	2660	32	25	0	0	A_42_P468662	NM_001108886	4209.94	405.518	8.038315e+002	8.044872e+001	835	43	7.932935e+000	0	0	0	0	0	0	788.725	1	1	51.7088	41.6875
DATA	2661	32	26	0	0	A_42_P522285	NM_001044263	4235.25	405.644	2.772352e+002	2.791305e+001	332.5	38	7.307284e+000	0	0	0	0	0	0	272.037	1	1	48.5334	38.7838
DATA	2662	32	27	0	0	A_42_P478500	NM_177421	4260.58	405.573	8.355296e+004	8.355296e+003	81211	44	9.702757e+000	0	0	0	0	0	0	81971.5	1	1	57.5363	45.9118
DATA	2663	32	28	0	0	A_42_P739860	NM_133578	4285.93	405.8	1.173778e+003	1.174227e+002	1133	40	8.617561e+000	0	0	0	0	0	0	1151.11	1	1	46.8651	41.0645
DATA	2664	32	29	0	0	A_42_P708614	NM_001130505	4311.56	406	1.931866e+004	1.931868e+003	19085.5	42	9.208692e+000	0	0	0	0	0	0	18933.9	1	1	49.8279	41.4
DATA	2665	32	30	0	0	A_64_P067000	NM_001108721	4336.88	406	5.848037e+002	5.857082e+001	632.5	42.5	9.084899e+000	0	0	0	0	0	0	572.675	1	1	49.8279	44.1538
DATA	2666	32	31	0	0	A_44_P590748	NM_001109199	4361.7	405.955	3.942741e+001	5.114203e+000	101	39	5.518883e+000	0	0	0	0	0	0	38.5695	1	1	45.835	39.5161
DATA	2667	32	32	0	0	A_42_P742797	NM_001106761	4387.69	406	1.446812e+003	1.447179e+002	1434	44.5	8.946046e+000	0	0	0	0	0	0	1413.47	1	1	50.4627	44.5714
DATA	2668	32	33	0	0	A_42_P761277	NM_001008297	4412.93	405.8	6.434052e+002	6.442339e+001	681	41	7.213083e+000	0	0	0	0	0	0	627.631	1	1	46.8651	42.5
DATA	2669	32	34	0	0	A_42_P503739	FQ231471	4438	405.797	6.985941e+003	6.986017e+002	6642	41	6.927974e+000	0	0	0	0	0	0	6803.05	1	1	46.8651	41.0556
DATA	2670	32	35	0	0	A_42_P635760	ENSRNOT00000023806	4463.77	405.884	4.303416e+003	4.303541e+002	4243	44	1.009472e+001	0	0	0	0	0	0	4182.51	1	1	46.5243	42.8182
DATA	2671	32	36	0	0	A_64_P136337	ENSRNOT00000064588	4488.93	405.8	1.811589e+003	1.811887e+002	1760	43	9.096918e+000	0	0	0	0	0	0	1756.92	1	1	46.8651	43.9474
DATA	2672	32	37	0	0	A_64_P128316	ENSRNOT00000062007	4514.77	405.987	1.132585e+001	3.482779e+000	74	43	5.885818e+000	0	0	0	0	0	0	10.9576	1	0	49.1849	42
DATA	2673	32	38	0	0	A_64_P050799	A_64_P050799	4540.34	406.206	9.856044e+001	1.039447e+001	162	41.5	9.672562e+000	0	0	0	0	0	0	95.1092	1	1	46.5243	40.9615
DATA	2674	32	39	0	0	A_42_P701779	NM_001108048	4565.5	406	1.069194e+003	1.069706e+002	1073	39	9.424355e+000	0	0	0	0	0	0	1028.89	1	1	54.1152	40.5385
DATA	2675	32	40	0	0	A_42_P604900	NM_199117	4590.48	406.147	1.998470e+003	1.998746e+002	1960.5	41.5	8.760915e+000	0	0	0	0	0	0	1917.51	1	1	49.8279	43.1667
DATA	2676	32	41	0	0	A_44_P1060444	NM_001106644	4615.77	405.641	1.859699e+003	1.859998e+002	1814	48	1.383322e+001	0	0	0	0	0	0	1778.66	1	1	44.7812	46.9
DATA	2677	32	42	0	0	A_64_P090339	NM_001000756	4641.09	405.965	2.776561e+001	4.345490e+000	92	44.5	1.150954e+001	0	0	0	0	0	0	26.4669	1	1	43.3362	45.8929
DATA	2678	32	43	0	0	A_42_P770556	NM_033096	4666.64	405.871	3.863946e+003	3.864091e+002	3564	45	1.076435e+001	0	0	0	0	0	0	3670.03	1	1	46.8651	44.9394
DATA	2679	32	44	0	0	A_44_P606502	NM_001130502	4692.11	405.8	1.428374e+001	3.657807e+000	78	46	9.429259e+000	0	0	0	0	0	0	13.516	1	0	45.835	46.0286
DATA	2680	32	45	0	0	A_64_P372189	NM_212516	4717.54	406.118	2.290178e+004	2.290180e+003	21541.5	46.5	1.024639e+001	0	0	0	0	0	0	21586.6	1	1	49.8279	47.3333
DATA	2681	32	46	0	0	A_42_P540518	NM_199399	4743.01	406.224	1.550551e+003	1.550922e+002	1448	48	1.117388e+001	0	0	0	0	0	0	1455.55	1	1	49.1849	46.5882
DATA	2682	32	47	0	0	A_64_P158955	ENSRNOT00000020260	4768.58	406.427	7.596322e+000	3.492425e+000	71.5	45	6.543582e+000	0	0	0	0	0	0	7.1007	1	0	65	44.5385
DATA	2683	32	48	0	0	A_44_P325841	NM_024130	4793.76	406.296	9.322223e+002	9.328508e+001	912	42.5	1.126037e+001	0	0	0	0	0	0	867.615	1	1	47.2035	45.1471
DATA	2684	32	49	0	0	A_64_P007743	XM_001071416	4819.33	406.076	1.027543e+002	1.083575e+001	160	39	9.347448e+000	0	0	0	0	0	0	95.1972	1	1	45.835	41.0857
DATA	2685	32	50	0	0	A_64_P136213	A_64_P136213	4843.83	406.31	3.467612e+000	3.454747e+000	64	44	1.051490e+001	0	0	0	0	0	0	0.0130544	0	0	36.5637	44.7143
DATA	2686	32	51	0	0	A_43_P17392	NM_001191693	4869.93	406.342	1.388771e+003	1.389205e+002	1320	43	1.031870e+001	0	0	0	0	0	0	1274.64	1	1	48.8603	43.7714
DATA	2687	32	52	0	0	A_42_P708569	NM_001191837	4895.31	406.389	3.085669e+003	3.085866e+002	2880	37	8.333505e+000	0	0	0	0	0	0	2818.33	1	1	48.2044	38.2258
DATA	2688	32	53	0	0	A_64_P062068	XM_002728030	4921	406.455	1.007130e+002	1.066419e+001	154	37.5	1.048286e+001	0	0	0	0	0	0	91.526	1	1	55.8519	39.4412
DATA	2689	32	54	0	0	A_43_P20266	NM_001106416	4946.14	406.694	1.113380e+002	1.167812e+001	165	42	8.190277e+000	0	0	0	0	0	0	100.678	1	1	47.8731	42.375
DATA	2690	32	55	0	0	A_44_P248235	NM_001106048	4971.67	406.5	3.815833e+001	5.206439e+000	98	41	9.120566e+000	0	0	0	0	0	0	34.3265	1	1	65	43.4483
DATA	2691	32	56	0	0	A_64_P134717	NM_001101007	4997.33	406.5	7.291951e+000	3.634659e+000	71	40	9.145799e+000	0	0	0	0	0	0	6.52531	1	0	57.5363	41.4865
DATA	2692	32	57	0	0	A_44_P555005	NM_001000944	5022.39	406.637	2.659234e+001	4.458956e+000	85	39	1.053249e+001	0	0	0	0	0	0	23.6739	1	1	50.7771	41
DATA	2693	32	58	0	0	A_42_P832028	NM_001006978	5047.76	406.296	7.409951e+002	7.418683e+001	712	40	7.914776e+000	0	0	0	0	0	0	656.177	1	1	47.2035	42.3333
DATA	2694	32	59	0	0	A_42_P768380	NM_001100158	5073.11	406.352	3.182896e+003	3.183101e+002	2831	41	9.794880e+000	0	0	0	0	0	0	2803.68	1	1	47.8731	42.9444
DATA	2695	32	60	0	0	A_42_P585530	NM_001037791	5098.68	406.449	4.317660e+002	4.332949e+001	438.5	47	8.115160e+000	0	0	0	0	0	0	378.297	1	1	50.1463	47.6786
DATA	2696	32	61	0	0	A_42_P717175	NM_001013428	5124.33	406.5	1.797664e+002	1.834470e+001	222.5	43	1.126800e+001	0	0	0	0	0	0	156.663	1	1	57.5363	45.697
DATA	2697	32	62	0	0	A_44_P293001	NM_001047885	5149.5	406.5	1.825455e+001	4.103870e+000	79	43	1.125336e+001	0	0	0	0	0	0	15.8253	1	0	57.5363	45.973
DATA	2698	32	63	0	0	A_64_P110151	XM_223741	5174.87	406.757	5.779557e+003	5.779675e+002	5033.5	41.5	8.793351e+000	0	0	0	0	0	0	4984.36	1	1	46.5243	42.6389
DATA	2699	32	64	0	0	A_42_P808236	NM_001107189	5200.64	406.727	2.971931e+001	4.756925e+000	90	41.5	1.015515e+001	0	0	0	0	0	0	25.4955	1	1	46.1809	42.3571
[truncated: 6,308,689 more chars]
