# Supplementary material for: Gene Expression in the Hippocampus in a Rat Model of Premenstrual Dysphoric Disorder After Treatment With Baixiangdan Capsules
Source: Front Psychol. 2018 Nov 13;9:2065. doi: 10.3389/fpsyg.2018.02065 (PMC6242977; doi:10.3389/fpsyg.2018.02065)
Supplement: Supplementary file 2 [file Data_Sheet_2.ZIP › Raw Data Files/14_21.txt]

TYPE	text	text	text	integer	text	float	float	text	integer	text	text	integer	integer	integer	integer	float	float	float	float	float	float	text	text	text	text	text	text	text	text	text	text	text	integer	integer	integer	text	integer	boolean
FEPARAMS	Protocol_Name	Protocol_date	Scan_ScannerName	Scan_NumChannels	Scan_Date	Scan_MicronsPerPixelX	Scan_MicronsPerPixelY	Scan_OriginalGUID	Scan_NumScanPass	Grid_Name	Grid_Date	Grid_NumSubGridRows	Grid_NumSubGridCols	Grid_NumRows	Grid_NumCols	Grid_RowSpacing	Grid_ColSpacing	Grid_OffsetX	Grid_OffsetY	Grid_NomSpotWidth	Grid_NomSpotHeight	Grid_GenomicBuild	FeatureExtractor_Barcode	FeatureExtractor_Sample	FeatureExtractor_ScanFileName	FeatureExtractor_ArrayName	FeatureExtractor_ScanFileGUID	FeatureExtractor_DesignFileName	FeatureExtractor_ExtractionTime	FeatureExtractor_UserName	FeatureExtractor_ComputerName	FeatureExtractor_Version	FeatureExtractor_IsXDRExtraction	FeatureExtractor_ColorMode	FeatureExtractor_QCReportType	DyeNorm_NormFilename	DyeNorm_NormNumProbes	Grid_IsGridFile
DATA	GE1_1100_Jul11 (Read Only)	1-Jul-2011 22:30	Agilent Technologies Scanner G2505C US10450393	1	07-11-2013 11:36:06	5	5	2b0edc4a-cb3a-4eca-830e-566ae8841b18	1	028282_D_F_20120224	24-Feb-2012 00:00	1	1	532	85	73.3235	63.5	0	36.6617	65	65	rn4:RGSCv3.4:Nov2004	1_3		M:\2013.07.11 Rat GE 1-color 4x44k(sunpeng)\\US10450393_S01.tif	US10450393_S01	6030c60e-d494-4e84-bafe-d546c781a172	028282_D_F_20120224.xml	11-Jul-2013 15:17:26	admin	KCSY01	11.0.1.1	0	0	0		0	0
*
TYPE	float	float	float	integer	integer	float	float	float	integer	float	float	float	integer	float	float	integer	integer	integer	integer	integer	float	float	float	integer	float	float	float	float	float	integer	integer	float	float	float	float	float	integer	float	float	float	float	integer	float	float	float	float	float	integer	float	float	float	float	float	float	float	integer	float	integer	float	float	float	float	integer	float	float	float	float	text	float	float	float	float	float	float	float	float	float	float	float	float	float	float	float	float	float	float	float	float	float	integer	integer	integer	integer	float	integer	text	integer	text	float	float	float	integer	boolean	float	float	boolean	float	boolean	float	boolean	float	boolean	float	boolean	float	boolean	float	boolean	float	boolean	float	boolean	float	boolean	float	boolean
STATS	gDarkOffsetAverage	gDarkOffsetMedian	gDarkOffsetStdDev	gDarkOffsetNumPts	gSaturationValue	gAvgSig2BkgeQC	gAvgSig2BkgNegCtrl	gRatioSig2BkgeQC_NegCtrl	gNumSatFeat	gLocalBGInlierNetAve	gLocalBGInlierAve	gLocalBGInlierSDev	gLocalBGInlierNum	gGlobalBGInlierAve	gGlobalBGInlierSDev	gGlobalBGInlierNum	gNumFeatureNonUnifOL	gNumPopnOL	gNumNonUnifBGOL	gNumPopnBGOL	gOffsetUsed	gGlobalFeatInlierAve	gGlobalFeatInlierSDev	gGlobalFeatInlierNum	AnyColorPrcntFeatNonUnifOL	AnyColorPrcntBGNonUnifOL	AnyColorPrcntFeatPopnOL	AnyColorPrcntBGPopnOL	TotalPrcntFeatOL	gNumNegBGSubFeat	gNonCtrlNumNegFeatBGSubSig	gSpatialDetrendRMSFit	gSpatialDetrendRMSFilteredMinusFit	gSpatialDetrendSurfaceArea	gSpatialDetrendVolume	gSpatialDetrendAveFit	gNonCtrlNumSatFeat	gNonCtrl99PrcntNetSig	gNonCtrl50PrcntNetSig	gNonCtrl1PrcntNetSig	gNonCtrlMedPrcntCVBGSubSig	gCtrleQCNumSatFeat	gCtrleQC99PrcntNetSig	gCtrleQC50PrcntNetSig	gCtrleQC1PrcntNetSig	geQCMedPrcntCVBGSubSig	geQCSig2BkgLow2	gNegCtrlNumInliers	gNegCtrlAveNetSig	gNegCtrlSDevNetSig	gNegCtrlAveBGSubSig	gNegCtrlSDevBGSubSig	gAveNumPixOLLo	gAveNumPixOLHi	gPixCVofHighSignalFeat	gNumHighSignalFeat	AddErrorEstimateGreen	TotalNumFeatures	ROIHeight	ROIWidth	CentroidDiffX	CentroidDiffY	NumFoundFeat	MaxNonUnifEdges	MaxSpotNotFoundEdges	gMultDetrendRMSFit	gMultDetrendSurfaceAverage	eQCLowSigName2	eQCOneColorLogLowSignal	eQCOneColorLogLowSignalError	eQCOneColorLogHighSignal	eQCOneColorLinFitLogLowConc	eQCOneColorLinFitLogLowSignal	eQCOneColorLinFitLogHighConc	eQCOneColorLinFitLogHighSignal	eQCOneColorLinFitSlope	eQCOneColorLinFitIntercept	eQCOneColorLinFitRSQ	eQCOneColorSpikeDetectionLimit	gNonCtrl50PrcntBGSubSig	gCtrleQC50PrcntBGSubSig	gMedPrcntCVProcSignal	geQCMedPrcntCVProcSignal	gOutlierFlagger_Auto_FeatB_Term	gOutlierFlagger_Auto_FeatC_Term	gOutlierFlagger_Auto_BgndB_Term	gOutlierFlagger_Auto_BgndC_Term	OutlierFlagger_FeatChiSq	OutlierFlagger_BgndChiSq	GriddingStatus	IsGoodGrid	NumGeneNonUnifOL	TotalNumberOfReplicatedGenes	gPercentileIntensityProcessedSignal	ExtractionStatus	QCMetricResults	gNonCtrlNumWellAboveBG	ImageDepth	AFHold	gPMTVolts	GlassThickness	gDDN	GridHasBeenOptimized	gNegCtrlSpread	Metric_IsGoodGrid	Metric_IsGoodGrid_IsInRange	Metric_AnyColorPrcntFeatNonUnifOL	Metric_AnyColorPrcntFeatNonUnifOL_IsInRange	Metric_gNegCtrlAveNetSig	Metric_gNegCtrlAveNetSig_IsInRange	Metric_gNegCtrlAveBGSubSig	Metric_gNegCtrlAveBGSubSig_IsInRange	Metric_gNegCtrlSDevBGSubSig	Metric_gNegCtrlSDevBGSubSig_IsInRange	Metric_gSpatialDetrendRMSFilteredMinusFit	Metric_gSpatialDetrendRMSFilteredMinusFit_IsInRange	Metric_gNonCntrlMedCVProcSignal	Metric_gNonCntrlMedCVProcSignal_IsInRange	Metric_gE1aMedCVProcSignal	Metric_gE1aMedCVProcSignal_IsInRange	Metric_absGE1E1aSlope	Metric_absGE1E1aSlope_IsInRange	Metric_DetectionLimit	Metric_DetectionLimit_IsInRange	Metric_gDDN	Metric_gDDN_IsInRange
DATA	7.82249	7.82249	1.82201	0	778132	1.42576	1.8539	0.769058	0	27.4002	35.2227	3.97693	43963	35.2227	3.97693	43963	2	643	26	289	7.82249	4539.12	12840.3	43609	0.00451937	0.0587518	1.45298	0.653048	0.00466451	1130	521	1.94436	2.93515	1.00035	5.50315	63.088	0	67496.1	423.892	54.1458	7.00573	0	195.521	64.0324	50.1299	-1	1.73636	149	48.6102	3.09278	-6.61219	2.65433	0.607561	0.651263	0.110409	7110	2.93515	44254	4.3319	7.61806	0.72953	0.819445	42010	0	0.0864662	0.0589557	1.00037	(+)E1A_r60_3	0	0	0	0	0	0	0	0	0	0	-1	369.043	8.49546	2.80765	-1	1086.77	99.5593	95.5385	52.6572	1.94567	2.51415	0	1	2	30367	3113.64	1	ExtractionEvaluate	38403	20 Bit	0	354	976.117	1	0	10.1908	1	1	0.00451937	1	48.6102	0	-6.61219	1	2.65433	1	2.93515	1	2.80765	1	-1	0	0	0	-1	0	1	1
*
TYPE	integer	integer	integer	integer	integer	text	text	float	float	float	float	float	float	float	boolean	boolean	boolean	boolean	boolean	boolean	float	boolean	boolean	float	float
FEATURES	FeatureNum	Row	Col	SubTypeMask	ControlType	ProbeName	SystematicName	PositionX	PositionY	gProcessedSignal	gProcessedSigError	gMedianSignal	gBGMedianSignal	gBGPixSDev	gIsSaturated	gIsFeatNonUnifOL	gIsBGNonUnifOL	gIsFeatPopnOL	gIsBGPopnOL	IsManualFlag	gBGSubSignal	gIsPosAndSignif	gIsWellAboveBG	SpotExtentX	gBGMeanSignal
DATA	1	1	1	260	1	GE_BrightCorner	GE_BrightCorner	6740.25	189.588	5.983579e+004	5.983580e+003	54409	27	7.389884e+000	0	0	0	0	0	0	53282.1	1	1	58.0869	27.633
DATA	2	1	2	66	1	DarkCorner	DarkCorner	6765.42	189.427	8.952143e+000	3.392400e+000	73	30	7.605070e+000	0	0	0	1	0	0	8.03016	1	0	65	30.1756
DATA	3	1	3	66	1	DarkCorner	DarkCorner	6790.58	189.427	6.615089e+000	3.315940e+000	68.5	30	7.990714e+000	0	0	0	0	0	0	5.97555	1	0	57.5363	30.2791
DATA	4	1	4	66	1	DarkCorner	DarkCorner	6816.25	189.369	6.548008e+000	3.293115e+000	70	29	7.463079e+000	0	0	0	0	0	0	5.95515	1	0	51.7088	29.7233
DATA	5	1	5	66	1	DarkCorner	DarkCorner	6841.26	189.195	7.236936e+000	3.287995e+000	68	29	7.705561e+000	0	0	0	1	0	0	6.62273	1	0	49.5074	29.5449
DATA	6	1	6	66	1	DarkCorner	DarkCorner	6866.67	189.5	1.461633e+001	3.506915e+000	75	29	8.440826e+000	0	0	0	1	0	0	13.4579	1	0	57.5363	30.0218
DATA	7	1	7	66	1	DarkCorner	DarkCorner	6892.42	189.427	5.694502e+000	3.220329e+000	67	29	7.608583e+000	0	0	0	0	0	0	5.27332	1	0	57.5363	29.6788
DATA	8	1	8	66	1	DarkCorner	DarkCorner	6917.58	189.427	3.164319e+000	3.152867e+000	61	29	8.083148e+000	0	0	0	0	0	0	-1.59737	0	0	57.5363	29.796
DATA	9	1	9	66	1	DarkCorner	DarkCorner	6943.11	189.5	3.148377e+000	3.136983e+000	63	29	7.418340e+000	0	0	0	0	0	0	-0.292081	0	0	56.9804	29.3034
DATA	10	1	10	66	1	DarkCorner	DarkCorner	6968.5	189.5	3.133695e+000	3.122354e+000	54	28	7.107469e+000	0	0	0	0	0	0	-7.44578	0	0	57.5363	28.1973
DATA	11	1	11	66	1	DarkCorner	DarkCorner	6994.4	189.412	3.119904e+000	3.108613e+000	61	29	7.770377e+000	0	0	0	0	0	0	-0.370614	0	0	52.3208	30.1818
DATA	12	1	12	0	0	A_64_P076162	A_64_P076162	7018.94	189.618	8.734868e+001	9.267428e+000	141	30	8.602152e+000	0	0	0	0	0	0	82.8016	1	1	46.1809	31.3707
DATA	13	1	13	0	0	A_64_P002176	NM_001170551	7044.5	189.5	6.097898e+002	6.105696e+001	631.5	31	8.838890e+000	0	0	0	0	0	0	580.198	1	1	57.5363	31.6339
DATA	14	1	14	0	0	A_42_P664913	NM_001108400	7069.88	189.397	7.757814e+002	7.763903e+001	786	31	9.422777e+000	0	0	0	0	0	0	740.639	1	1	48.5334	31.613
DATA	15	1	15	0	0	A_43_P13320	NM_138880	7095.5	189.5	2.345098e+001	3.858991e+000	82	30	9.057944e+000	0	0	0	0	0	0	22.4597	1	1	57.5363	31.7414
DATA	16	1	16	0	0	A_64_P126523	A_64_P126523	7120.67	189.5	2.248325e+001	3.794074e+000	85	31	8.385215e+000	0	0	0	0	0	0	21.5931	1	1	57.5363	32.1004
DATA	17	1	17	0	0	A_64_P038045	XM_002730109	7146.33	189.5	6.008640e+001	6.737673e+000	118	30	7.453377e+000	0	0	0	0	0	0	57.855	1	1	57.5363	30.0777
DATA	18	1	18	0	0	A_43_P11804	NM_017066	7171.5	189.5	1.891463e+004	1.891465e+003	17834.5	29	8.591967e+000	0	0	0	0	0	0	18252.6	1	1	57.5363	30.682
DATA	19	1	19	0	0	A_44_P808710	XM_001069205	7197	189.545	3.542697e+001	4.665356e+000	96	30	7.970048e+000	0	0	0	0	0	0	34.2547	1	1	55.8519	30.9319
DATA	20	1	20	0	0	A_64_P142111	NM_001100887	7222.38	190	8.285774e+002	8.291312e+001	882	31	8.529603e+000	0	0	0	0	0	0	802.602	1	1	48.5334	31.1051
DATA	21	1	21	0	0	A_64_P095642	A_64_P095642	7247.67	189.5	1.652313e+002	1.679799e+001	227	30	7.950996e+000	0	0	0	0	0	0	160.256	1	1	57.5363	30.8787
DATA	22	1	22	0	0	A_42_P735279	NM_001004446	7273.33	189.5	2.914458e+004	2.914459e+003	27128.5	31	8.516308e+000	0	0	0	0	0	0	28299.6	1	1	57.5363	31.166
DATA	23	1	23	0	0	A_44_P902822	XM_001063709	7298.61	189.362	4.444056e+001	5.373222e+000	106	29	7.476959e+000	0	0	0	0	0	0	43.1885	1	1	47.5395	30.1417
DATA	24	1	24	0	0	A_42_P563843	NM_022263	7324	189.545	8.662903e+000	3.140071e+000	74	29	7.624243e+000	0	0	0	0	0	0	8.42451	1	0	55.8519	30.0804
DATA	25	1	25	0	0	A_42_P610788	NM_031544	7349.34	189.878	1.144018e+004	1.144022e+003	11118	30	8.391374e+000	0	0	0	0	0	0	11130.5	1	1	48.8603	31.501
DATA	26	1	26	0	0	A_44_P242429	NM_001134842	7374.31	189.662	3.473633e+003	3.473764e+002	3236	30	7.624578e+000	0	0	0	0	0	0	3379.86	1	1	48.5334	30.1046
DATA	27	1	27	0	0	A_64_P020571	NM_001031659	7399.56	189.74	4.083536e+002	4.094665e+001	428	30	7.794967e+000	0	0	0	0	0	0	397.298	1	1	49.5074	30.1375
DATA	28	1	28	0	0	A_42_P518462	NM_001007020	7425.46	189.882	8.995059e+003	8.995109e+002	8743.5	31	8.977768e+000	0	0	0	0	0	0	8748.81	1	1	49.8279	31.9776
DATA	29	1	29	0	0	A_42_P469751	XM_001054007	7451	189.545	3.393941e+002	3.407349e+001	378	31	9.037932e+000	0	0	0	0	0	0	329.886	1	1	65	32.2647
DATA	30	1	30	0	0	A_44_P209459	NM_022387	7476.19	189.608	1.144245e+004	1.144249e+003	10686	31	8.601671e+000	0	0	0	0	0	0	11113.3	1	1	49.1849	31.4626
DATA	31	1	31	0	0	A_64_P018547	NM_001108717	7501.44	189.74	1.256031e+003	1.256395e+002	1240	30	7.925446e+000	0	0	0	0	0	0	1218.72	1	1	49.5074	30.2874
DATA	32	1	32	0	0	A_64_P111513	A_64_P111513	7526.97	189.473	3.210164e+001	4.413575e+000	91	30.5	8.074780e+000	0	0	0	0	0	0	31.1076	1	1	48.5334	30.9846
DATA	33	1	33	0	0	A_42_P493925	NM_198785	7552.38	190	7.166034e+002	7.172450e+001	756	30	8.170472e+000	0	0	0	0	0	0	693.51	1	1	48.5334	30.315
DATA	34	1	34	0	0	A_64_P049828	NM_012543	7577.61	190.216	2.489287e+003	2.489473e+002	2469	30	7.851306e+000	0	0	0	0	0	0	2405.29	1	1	48.5334	30.3043
DATA	35	1	35	0	0	A_64_P137927	NM_001191885	7603.06	190.045	2.696455e+002	2.713575e+001	324	30	7.625885e+000	0	0	0	0	0	0	260.058	1	1	46.8651	30.2033
DATA	36	1	36	0	0	A_43_P19848	NM_001106018	7628.58	189.573	8.537462e+001	9.065879e+000	145	29	7.838788e+000	0	0	0	0	0	0	82.1624	1	1	57.5363	29.7432
DATA	37	1	37	0	0	A_44_P308673	NM_139108	7653.88	189.882	3.058420e+002	3.073654e+001	361	28	7.868381e+000	0	0	0	0	0	0	293.71	1	1	48.2044	28.9644
DATA	38	1	38	0	0	A_64_P004269	NM_001191660	7679.43	189.903	2.319073e+003	2.319275e+002	2273	28	7.289483e+000	0	0	0	0	0	0	2221.74	1	1	48.2044	28.0553
DATA	39	1	39	0	0	A_42_P543670	NM_012572	7704.61	189.931	1.308229e+002	1.343802e+001	183	28	7.703365e+000	0	0	0	0	0	0	125.015	1	1	53.8203	28.5963
DATA	40	1	40	0	0	A_64_P164696	TC605704	7730.47	189.924	9.280859e+000	3.216873e+000	71.5	27	7.544838e+000	0	0	0	0	0	0	8.84415	1	0	45.1352	28.0913
DATA	41	1	41	0	0	A_64_P055763	NM_001191822	7755.43	189.823	1.512350e+004	1.512353e+003	13880.5	28	7.510333e+000	0	0	0	0	0	0	14370.5	1	1	49.5074	28.836
DATA	42	1	42	0	0	A_64_P068622	NM_001013056	7780.78	190.075	1.536909e+003	1.537221e+002	1512	28	7.461410e+000	0	0	0	0	0	0	1456.02	1	1	45.835	28.8049
DATA	43	1	43	0	0	A_44_P915877	XM_001065403	7806.37	190.127	3.058609e+002	3.074362e+001	350	30	7.812624e+000	0	0	0	0	0	0	288.832	1	1	47.5395	29.9571
DATA	44	1	44	0	0	A_42_P647599	NM_024129	7831.59	190.092	7.162056e+002	7.168843e+001	711	30	7.550668e+000	0	0	0	0	0	0	674.07	1	1	49.1849	29.9937
DATA	45	1	45	0	0	A_42_P798776	XM_002725203	7857.06	189.976	6.510647e+003	6.510722e+002	6028	30	8.430852e+000	0	0	0	0	0	0	6105.95	1	1	50.7771	30.0891
DATA	46	1	46	0	0	A_42_P781735	NM_053319	7882.5	190	9.626602e+004	9.626602e+003	90776.5	30	8.987842e+000	0	0	0	0	0	0	89954.2	1	1	54.1152	30.9407
DATA	47	1	47	0	0	A_42_P553611	TC630296	7908	189.817	6.757461e+003	6.757534e+002	6135	29	7.429973e+000	0	0	0	0	0	0	6290.24	1	1	46.8651	29.7143
DATA	48	1	48	0	0	A_43_P12729	NM_032615	7933.35	189.933	4.786947e+003	4.787052e+002	4305	29	8.577775e+000	0	0	0	0	0	0	4438.79	1	1	49.1849	30.0804
DATA	49	1	49	0	0	A_42_P507072	FQ213070	7958.5	190	5.139579e+003	5.139678e+002	4617.5	28	8.020539e+000	0	0	0	0	0	0	4746.93	1	1	48.5334	29.296
DATA	50	1	50	0	0	A_42_P645467	NM_001108804	7984.43	190.127	2.819091e+001	4.258111e+000	88	29	8.058549e+000	0	0	0	0	0	0	25.9284	1	1	49.5074	29.8609
DATA	51	1	51	0	0	A_42_P738431	NM_019175	8009.44	190.027	3.372016e+003	3.372168e+002	3024	29	8.084699e+000	0	0	0	0	0	0	3088.37	1	1	48.5334	29.7424
DATA	52	1	52	0	0	A_42_P712297	NM_001135583	8034.63	190	4.235497e+003	4.235619e+002	3795	29	8.055842e+000	0	0	0	0	0	0	3862.51	1	1	48.5334	29.4969
DATA	53	1	53	0	0	A_42_P657538	NM_001008362	8060.17	190	4.613691e+003	4.613804e+002	4080	28	7.294063e+000	0	0	0	0	0	0	4188.62	1	1	46.8651	28.8135
DATA	54	1	54	0	0	A_42_P515405	NM_212505	8085.63	190	3.915391e+002	3.928838e+001	422	27	6.775695e+000	0	0	0	1	0	0	353.853	1	1	48.5334	27.7531
DATA	55	1	55	0	0	A_64_P089886	NM_053476	8110.91	189.896	3.802253e+003	3.802393e+002	3403	28	7.413882e+000	0	0	0	0	0	0	3420.4	1	1	46.8651	28.2671
DATA	56	1	56	0	0	A_42_P528580	NM_001107528	8136.36	190.072	8.651027e+003	8.651089e+002	7628.5	27	7.671158e+000	0	0	0	0	0	0	7745.95	1	1	46.5243	28.072
DATA	57	1	57	0	0	A_43_P14285	NM_001034145	8161.85	190.107	1.442677e+004	1.442680e+003	12718.5	27	8.038859e+000	0	0	0	0	0	0	12855.7	1	1	50.1463	28.1072
DATA	58	1	58	0	0	A_42_P616287	NM_001134555	8187.2	190.216	1.523048e+002	1.558596e+001	200	27	8.159374e+000	0	0	0	0	0	0	135.067	1	1	47.8731	28.5711
DATA	59	1	59	0	0	A_42_P496411	NM_001109410	8212.86	190.205	5.409914e+003	5.410016e+002	4775.5	27	7.619353e+000	0	0	0	1	0	0	4773.81	1	1	47.5395	27.7628
DATA	60	1	60	0	0	A_44_P494310	NM_001009604	8238.14	190.211	6.953585e+003	6.953666e+002	5809	27	7.798674e+000	0	0	0	0	0	0	6105.66	1	1	47.2035	27.9787
DATA	61	1	61	0	0	A_42_P645142	NM_019375	8263.57	189.987	5.374264e+002	5.384756e+001	516	28	7.910166e+000	0	0	0	0	0	0	469.491	1	1	49.1849	28.8246
DATA	62	1	62	0	0	A_64_P042132	AABR03024196	8288.85	190.215	1.509243e+004	1.509247e+003	13189	27	7.417826e+000	0	0	0	0	0	0	13119	1	1	45.835	27.5058
DATA	63	1	63	0	0	A_42_P508085	NM_001009620	8313.93	190.268	4.093238e+003	4.093378e+002	3493.5	27	7.094700e+000	0	0	0	0	0	0	3540.12	1	1	47.5395	27.3424
DATA	64	1	64	0	0	A_64_P051159	NM_001100684	8339.67	190.389	1.604571e+003	1.604933e+002	1418.5	27	7.241705e+000	0	0	0	0	0	0	1380.56	1	1	48.2044	27.9803
DATA	65	1	65	0	0	A_64_P124041	ENSRNOT00000019667	8364.95	190.342	3.237740e+002	3.255848e+001	330	28	7.580361e+000	0	0	0	0	0	0	277.134	1	1	49.8279	28.2916
DATA	66	1	66	0	0	A_64_P131122	XR_086302	8390.5	190.352	1.200955e+002	1.249448e+001	163	27	7.558659e+000	0	0	0	0	0	0	102.258	1	1	57.5363	27.998
DATA	67	1	67	0	0	A_64_P021601	NM_031737	8415.57	190.224	1.064523e+002	1.119500e+001	150	27	7.219406e+000	0	0	0	0	0	0	90.171	1	1	46.5243	27.696
DATA	68	1	68	0	0	A_44_P776423	NM_001017386	8441.12	190.397	1.195060e+004	1.195065e+003	9830	28	8.492202e+000	0	0	0	0	0	0	10070	1	1	48.5334	28.7014
DATA	69	1	69	0	0	A_64_P120445	NM_080694	8466.63	189.75	5.124294e+001	6.206861e+000	103.5	28	8.547332e+000	0	0	0	0	0	0	42.9438	1	1	46.5243	28.121
DATA	70	1	70	0	0	A_42_P772878	NM_001011936	8491.86	190.27	3.116773e+003	3.116972e+002	2530.5	28	8.088068e+000	0	0	0	1	0	0	2598.79	1	1	48.2044	28.9779
DATA	71	1	71	0	0	A_42_P736315	NM_001108321	8517.37	190.127	6.535536e+003	6.535631e+002	5242.5	28	8.549437e+000	0	0	0	1	0	0	5420.48	1	1	47.5395	29.1265
DATA	73	1	73	0	0	A_64_P041004	NM_001108599	8568.32	190.395	2.668906e+004	2.668909e+003	21409	28	7.785619e+000	0	0	0	0	0	0	21906.1	1	1	49.5074	29.058
DATA	74	1	74	0	0	A_42_P494276	NM_001109663	8593.43	190.392	8.025345e+002	8.033390e+001	690	29	6.785814e+000	0	0	0	0	0	0	655.328	1	1	49.1849	29.0079
DATA	75	1	75	66	1	DarkCorner	DarkCorner	8619	190.455	3.626315e+000	3.613192e+000	58	29	7.117228e+000	0	0	0	0	0	0	-1.92495	0	0	55.8519	29.7303
DATA	76	1	76	66	1	DarkCorner	DarkCorner	8644.38	190.321	3.645170e+000	3.641328e+000	63	28	7.514333e+000	0	0	0	0	0	0	2.1075	0	0	51.0895	29.0801
DATA	77	1	77	66	1	DarkCorner	DarkCorner	8670.27	190.5	3.663987e+000	3.664298e+000	63	28	7.231592e+000	0	0	0	0	0	0	2.53311	0	0	51.0895	28.4502
DATA	78	1	78	66	1	DarkCorner	DarkCorner	8695.2	190.813	4.753644e+000	3.699206e+000	66	29	7.359609e+000	0	0	0	0	0	0	3.80333	1	0	48.8603	29.1495
DATA	79	1	79	66	1	DarkCorner	DarkCorner	8720.58	190.427	3.700816e+000	3.688858e+000	62	29	7.685285e+000	0	0	0	0	0	0	0.819029	0	0	57.5363	29.6008
DATA	80	1	80	66	1	DarkCorner	DarkCorner	8746.12	190.297	9.819775e+000	3.833897e+000	67	30	8.270606e+000	0	0	0	1	0	0	7.77725	1	0	48.8603	30.4771
DATA	81	1	81	66	1	DarkCorner	DarkCorner	8771.31	190.192	9.299271e+000	3.838522e+000	69	29	8.090336e+000	0	0	0	0	0	0	7.32908	1	0	48.2044	29.7985
DATA	82	1	82	66	1	DarkCorner	DarkCorner	8796.81	190.643	3.755285e+000	3.751306e+000	64	30	8.469889e+000	0	0	0	0	0	0	2.10518	0	0	51.4001	30.209
DATA	83	1	83	66	1	DarkCorner	DarkCorner	8822.33	190.5	2.605749e+001	4.574487e+000	81	28	7.287188e+000	0	0	0	1	0	0	20.3423	1	1	57.5363	29.1898
DATA	84	1	84	260	1	GE_BrightCorner	GE_BrightCorner	8847.5	190.5	6.548624e+004	6.548625e+003	50375.5	29	7.501691e+000	0	0	0	0	0	0	50887	1	1	57.5363	29.9667
DATA	85	1	85	260	1	GE_BrightCorner	GE_BrightCorner	8872.89	190.5	6.144546e+004	6.144547e+003	46694	29	8.387456e+000	0	0	0	0	0	0	47528.6	1	1	56.9804	30.2718
DATA	86	2	1	260	1	GE_BrightCorner	GE_BrightCorner	6752.58	196.573	6.148901e+004	6.148901e+003	55459	30	8.261579e+000	0	0	0	0	0	0	55080.3	1	1	57.5363	30.0995
DATA	87	2	2	66	1	DarkCorner	DarkCorner	6778	196.545	4.610410e+000	3.285605e+000	66	30	6.904682e+000	0	0	0	0	0	0	4.15981	1	0	55.8519	30.0583
DATA	88	2	3	66	1	DarkCorner	DarkCorner	6803.31	196.705	5.831549e+000	3.282973e+000	68	29	8.336119e+000	0	0	0	0	0	0	5.29797	1	0	50.1463	29.6765
DATA	89	2	4	66	1	DarkCorner	DarkCorner	6828.73	196.988	3.221163e+000	3.210668e+000	64	31	7.776015e+000	0	0	0	0	0	0	0.790066	0	0	49.8279	31.2158
DATA	90	2	5	66	1	DarkCorner	DarkCorner	6854.42	196.573	3.201580e+000	3.190414e+000	62	28	8.522932e+000	0	0	0	0	0	0	0.476446	0	0	57.5363	29.6555
DATA	91	2	6	66	1	DarkCorner	DarkCorner	6879.82	196.446	3.183146e+000	3.171626e+000	61	29	7.934111e+000	0	0	0	0	0	0	-1.06287	0	0	48.8603	29.7477
DATA	92	2	7	66	1	DarkCorner	DarkCorner	6904.97	196.615	3.165783e+000	3.155002e+000	63	29	7.169321e+000	0	0	0	0	0	0	0.607433	0	0	45.4864	29.7041
DATA	93	2	8	66	1	DarkCorner	DarkCorner	6930.47	196.932	3.149194e+000	3.152813e+000	63	29	7.556939e+000	0	0	0	0	0	0	2.875	0	0	48.5334	29.533
DATA	94	2	9	66	1	DarkCorner	DarkCorner	6954.67	196.214	3.135429e+000	3.124082e+000	40.5	27	7.252107e+000	0	0	0	1	0	0	-20.5908	0	0	36.5637	27.8075
DATA	95	2	10	66	1	DarkCorner	DarkCorner	6981.51	196.988	3.119883e+000	3.124050e+000	65	28	7.549108e+000	0	0	0	0	0	0	2.9307	0	0	49.8279	28.9621
DATA	96	2	11	0	0	A_44_P212746	ENSRNOT00000049707	7006.5	197	2.617058e+001	4.053812e+000	91.5	32	9.153697e+000	0	0	0	0	0	0	24.812	1	1	54.1152	32.7632
DATA	97	2	12	0	0	A_64_P103615	NM_001107179	7031.91	196.935	1.210757e+002	1.249418e+001	173	32	8.755070e+000	0	0	0	0	0	0	115.232	1	1	54.4085	31.4975
DATA	98	2	13	0	0	A_44_P550697	NM_001106400	7056.97	196.859	3.513159e+002	3.526576e+001	407	31	1.011457e+001	0	0	0	0	0	0	335.524	1	1	46.8651	32.1587
DATA	99	2	14	0	0	A_64_P045429	A_64_P045429	7082.5	197	1.045548e+002	1.089496e+001	162.5	31.5	1.047980e+001	0	0	0	0	0	0	100.185	1	1	54.1152	33.1075
DATA	100	2	15	0	0	A_64_P075175	ENSRNOT00000044322	7108.01	196.882	2.385580e+002	2.405052e+001	289	33	9.435516e+000	0	0	0	0	0	0	229.258	1	1	46.8651	34.1919
DATA	101	2	16	0	0	A_44_P472801	NM_173121	7133.24	197	5.488303e+003	5.488387e+002	5230	29	6.976711e+000	0	0	0	0	0	0	5288.43	1	1	46.8651	29.4133
DATA	102	2	17	0	0	A_42_P491486	NM_022533	7158.5	197	6.192514e+003	6.192589e+002	5718	29	7.729184e+000	0	0	0	0	0	0	5981.05	1	1	48.5334	29.5279
DATA	103	2	18	0	0	A_43_P12736	NM_033299	7184.31	197.194	1.032587e+002	1.076191e+001	164	30	8.216327e+000	0	0	0	0	0	0	99.9487	1	1	47.8731	31.2426
DATA	104	2	19	0	0	A_64_P158790	A_64_P158790	7209.5	197	5.019384e+004	5.019384e+003	48183	32	8.630110e+000	0	0	0	0	0	0	48669.3	1	1	54.1152	32.56
DATA	105	2	20	0	0	A_44_P229481	NM_001191077	7235	197	2.966373e+002	2.981731e+001	345.5	30	7.487384e+000	0	0	0	0	0	0	288.07	1	1	54.9904	30.6667
DATA	106	2	21	0	0	A_64_P133836	ENSRNOT00000039319	7260.5	197	1.384446e+001	3.320955e+000	77	31	8.458378e+000	0	0	0	0	0	0	13.4617	1	0	54.1152	32.0197
DATA	107	2	22	0	0	A_43_P13137	NM_130818	7285.61	197.069	1.989363e+001	3.612657e+000	80	31	8.886564e+000	0	0	0	0	0	0	19.363	1	1	53.8203	31.5812
DATA	108	2	23	0	0	A_42_P586141	NM_017035	7311.31	197.014	3.054342e+002	3.069171e+001	349.5	28	7.215057e+000	0	0	0	0	0	0	297.508	1	1	47.2035	29.0155
DATA	109	2	24	0	0	A_44_P142850	NM_001106975	7336.5	197	7.737734e+001	8.303255e+000	137	30	7.039085e+000	0	0	0	0	0	0	75.4057	1	1	54.1152	30.2857
DATA	110	2	25	0	0	A_44_P1042504	NM_001044232	7362	197	2.849730e+002	2.865594e+001	326	30	7.569907e+000	0	0	0	0	0	0	277.78	1	1	54.9904	30.445
DATA	111	2	26	0	0	A_42_P476474	NM_001033926	7387.44	197.027	5.940763e+003	5.940839e+002	5678	30	7.637936e+000	0	0	0	0	0	0	5790.88	1	1	48.5334	30.1053
DATA	112	2	27	0	0	A_44_P480882	ENSRNOT00000035496	7412.61	197.069	1.780949e+001	3.498946e+000	80	31	8.234282e+000	0	0	0	0	0	0	17.3563	1	1	53.8203	31.175
DATA	113	2	28	0	0	A_44_P1042696	NM_001106377	7438.08	197.093	1.099993e+004	1.099997e+003	10527	33	9.495433e+000	0	0	0	0	0	0	10715.1	1	1	47.5395	33.5744
DATA	114	2	29	0	0	A_64_P132576	NM_001012357	7463.63	196.873	3.268383e+002	3.282263e+001	391	31.5	8.246879e+000	0	0	0	0	0	0	318.139	1	1	47.5395	32.4223
DATA	115	2	30	0	0	A_42_P652357	NM_021868	7489.09	197.065	3.521986e+004	3.521987e+003	33672	32	9.047102e+000	0	0	0	0	0	0	34252.8	1	1	54.4085	32.2338
DATA	116	2	31	0	0	A_64_P134935	NM_001107976	7514.5	197.352	1.139231e+001	3.228856e+000	71.5	30	7.653041e+000	0	0	0	0	0	0	11.0678	1	0	57.5363	31.0622
DATA	117	2	32	0	0	A_64_P034019	NM_001107145	7539.63	196.914	4.482810e+001	5.408262e+000	105	31	8.052499e+000	0	0	0	0	0	0	43.4893	1	1	47.2035	31.5266
DATA	118	2	33	0	0	A_64_P140634	A_64_P140634	7564.74	197.222	3.731746e+003	3.731869e+002	3666	31	8.302162e+000	0	0	0	0	0	0	3615.08	1	1	47.5395	31.6089
DATA	120	2	35	0	0	A_42_P746029	NM_144748	7616	197.455	3.794800e+001	4.862890e+000	99	29.5	7.648346e+000	0	0	0	0	0	0	36.6281	1	1	55.8519	30.0153
DATA	121	2	36	0	0	A_64_P009032	NM_001105801	7641.42	197.427	4.081157e+004	4.081158e+003	38428	30	8.703964e+000	0	0	0	0	0	0	39308.4	1	1	57.5363	31.1066
DATA	122	2	37	0	0	A_42_P764792	NM_001014036	7666.72	196.971	3.582182e+002	3.595183e+001	402	29	7.450177e+000	0	0	0	0	0	0	344.197	1	1	46.1809	28.8088
DATA	123	2	38	0	0	A_64_P029278	NM_001108687	7691.95	197.158	4.889733e+002	4.899312e+001	522	27	7.248100e+000	0	0	0	0	0	0	468.701	1	1	48.2044	27.9799
DATA	124	2	39	0	0	A_43_P12266	NM_022622	7717.56	196.886	7.333199e+001	7.950078e+000	130	29	8.184541e+000	0	0	0	0	0	0	70.0997	1	1	47.5395	29.2254
DATA	125	2	40	0	0	A_44_P204710	ENSRNOT00000049315	7743	197.455	2.443121e+001	3.930326e+000	85	29	7.488410e+000	0	0	0	0	0	0	23.2918	1	1	55.8519	29.4
DATA	126	2	41	0	0	A_64_P163837	NM_001013149	7768.29	197.221	1.667357e+002	1.695712e+001	217.5	30	8.051437e+000	0	0	0	0	0	0	158.48	1	1	49.8279	30.3571
DATA	127	2	42	0	0	A_64_P016202	XM_001080153	7793.58	197.427	6.338437e+000	3.161724e+000	69	30	7.641930e+000	0	0	0	0	0	0	6.00615	1	0	57.5363	29.73
DATA	128	2	43	0	0	A_64_P137168	NM_053912	7818.75	197.356	1.177815e+004	1.177820e+003	10626.5	31	7.877904e+000	0	0	0	0	0	0	11124.3	1	1	48.5334	31.4508
DATA	129	2	44	0	0	A_42_P830598	XM_001063895	7844.5	197.5	1.342513e+003	1.342875e+002	1342	30.5	7.682138e+000	0	0	0	0	0	0	1263.63	1	1	49.1849	30.8093
DATA	130	2	45	0	0	A_42_P525886	NM_001105716	7869.89	197.5	8.746565e+002	8.752162e+001	844.5	32	9.718656e+000	0	0	0	0	0	0	820.336	1	1	65	32.3915
DATA	131	2	46	0	0	A_42_P836392	NM_134383	7895.36	196.914	1.193297e+004	1.193301e+003	11060	31	8.372349e+000	0	0	0	0	0	0	11148.8	1	1	46.8651	31.6971
DATA	132	2	47	0	0	A_44_P146783	NM_001001366	7920.58	197.427	5.020041e+001	5.928172e+000	108.5	29	8.955196e+000	0	0	0	0	0	0	46.7296	1	1	57.5363	30.3892
DATA	133	2	48	0	0	A_44_P294675	NM_053687	7946.11	197.5	2.122517e+002	2.145994e+001	261	29	8.947192e+000	0	0	0	0	0	0	196.798	1	1	56.9804	30.055
DATA	134	2	49	0	0	A_64_P047137	NM_001001283	7971.5	197.5	1.734011e+001	3.620761e+000	79	28	7.373647e+000	0	0	0	0	0	0	16.0123	1	1	57.5363	29.372
DATA	135	2	50	0	0	A_44_P170396	NM_017267	7996.89	197.5	1.734635e+001	3.632747e+000	78.5	29	8.453523e+000	0	0	0	0	0	0	15.9513	1	1	65	30.1088
DATA	136	2	51	0	0	A_64_P077603	ENSRNOT00000037503	8022.42	197.427	1.100904e+002	1.146628e+001	161	29	7.182059e+000	0	0	0	0	0	0	100.8	1	1	57.5363	28.8144
DATA	137	2	52	0	0	A_42_P648800	AA998304	8047.34	197.461	1.757648e+002	1.786890e+001	220	29	8.628834e+000	0	0	0	0	0	0	160.242	1	1	49.8279	30.2308
DATA	138	2	53	0	0	A_64_P143186	A_64_P143186	8073.11	197.5	7.324183e+001	8.006443e+000	130	28	6.412730e+000	0	0	0	0	0	0	66.4714	1	1	56.9804	28.1905
DATA	139	2	54	0	0	A_42_P622681	NM_001030020	8098.07	197.268	7.623003e+003	7.623072e+002	6703.5	27	6.296032e+000	0	0	0	1	0	0	6886.91	1	1	47.5395	27.2865
DATA	140	2	55	0	0	A_42_P506076	NM_019253	8123.67	197.5	3.922848e+004	3.922850e+003	34381.5	27	8.133017e+000	0	0	0	0	0	0	35276.9	1	1	57.5363	28.9034
DATA	141	2	56	0	0	A_64_P158975	NM_001109536	8149.4	197.564	1.945225e+002	1.972677e+001	233	27	7.718313e+000	0	0	0	0	0	0	174.094	1	1	50.1463	27.6485
DATA	142	2	57	0	0	A_42_P655425	NM_001106406	8174.76	197.634	1.129660e+003	1.130140e+002	1058	28	8.633891e+000	0	0	0	1	0	0	1006.2	1	1	47.5395	29.1891
DATA	143	2	58	0	0	A_44_P408520	NM_031569	8200.25	197.438	1.902118e+002	1.930731e+001	235	27	7.961833e+000	0	0	0	0	0	0	168.589	1	1	48.8603	28.7653
DATA	144	2	59	0	0	A_64_P031259	NM_001002022	8225.5	197.5	1.633306e+002	1.666863e+001	202	28.5	7.472511e+000	0	0	0	0	0	0	144.058	1	1	57.5363	28.3519
DATA	145	2	60	0	0	A_43_P10227	NM_024397	8250.5	197.5	1.433207e+004	1.433211e+003	12197	27	7.436664e+000	0	0	0	0	0	0	12579	1	1	49.1849	27.5192
DATA	146	2	61	0	0	A_42_P542744	NM_001107544	8275.81	197.392	7.285840e+003	7.285917e+002	6295	28	8.084637e+000	0	0	0	1	0	0	6362.42	1	1	49.1849	28.564
DATA	147	2	62	0	0	A_64_P052387	A_64_P052387	8301.58	197.573	1.275107e+002	1.319102e+001	172	27	6.986927e+000	0	0	0	0	0	0	110.782	1	1	57.5363	27.0485
DATA	149	2	64	0	0	A_64_P064823	ENSRNOT00000050238	8352.12	197.613	3.527418e+002	3.543892e+001	363	29	7.997610e+000	0	0	0	0	0	0	303.351	1	1	49.1849	29.2584
DATA	150	2	65	0	0	A_42_P730292	NM_001004244	8377.74	197.5	2.437578e+003	2.437820e+002	2136.5	27	7.564978e+000	0	0	0	0	0	0	2085.27	1	1	50.4627	27.9806
DATA	151	2	66	0	0	A_64_P052878	FM104687	8402.94	197.506	3.504016e+002	3.520947e+001	352.5	27	6.973203e+000	0	0	0	0	0	0	298.215	1	1	49.5074	27.4894
DATA	152	2	67	0	0	A_64_P157171	XM_001063008	8428.49	197.602	2.448265e+003	2.448510e+002	2141.5	28	7.721894e+000	0	0	0	0	0	0	2072.77	1	1	51.7088	28.0882
DATA	153	2	68	0	0	A_44_P693350	ENSRNOT00000030985	8454	197.545	1.577314e+001	3.825496e+000	71	28	9.331540e+000	0	0	0	0	0	0	13.2838	1	0	65	29.0394
DATA	154	2	69	0	0	A_64_P090168	NM_001000720	8479.42	197.573	4.507656e+001	5.709046e+000	101	27	8.115474e+000	0	0	0	0	0	0	37.7645	1	1	57.5363	27.6485
DATA	155	2	70	0	0	A_42_P726392	NM_001106353	8504.58	197.573	1.804094e+003	1.804437e+002	1461	29	8.912851e+000	0	0	0	1	0	0	1503.63	1	1	57.5363	29.9541
DATA	156	2	71	0	0	A_64_P015727	FQ218047	8530.38	197.556	5.953157e+003	5.953262e+002	4773	26	7.608538e+000	0	0	0	0	0	0	4935.38	1	1	48.2044	27.86
DATA	157	2	72	0	0	A_44_P897023	NM_001008364	8555.44	197.521	1.057143e+003	1.057742e+002	917	28	7.609012e+000	0	0	0	0	0	0	871.902	1	1	48.2044	28.2115
DATA	158	2	73	0	0	A_44_P104776	NM_001001425	8581	197.545	7.329555e+001	8.155979e+000	120	29	6.690571e+000	0	0	0	0	0	0	60.1372	1	1	65	29.598
DATA	159	2	74	0	0	A_64_P142521	A_64_P142521	8606.37	198	1.625673e+001	3.945840e+000	74	29	6.853625e+000	0	0	0	0	0	0	13.2714	1	0	49.5074	29.7941
DATA	160	2	75	66	1	DarkCorner	DarkCorner	8632.1	197.972	3.627321e+000	3.624810e+000	65	29	7.568585e+000	0	0	0	0	0	0	2.25145	0	0	46.8651	29.5949
DATA	161	2	76	66	1	DarkCorner	DarkCorner	8657.49	198.169	3.645651e+000	3.632457e+000	57.5	29	7.205295e+000	0	0	0	0	0	0	-2.89303	0	0	47.8731	29.0773
DATA	162	2	77	66	1	DarkCorner	DarkCorner	8682.61	197.625	3.664586e+000	3.651988e+000	62	28	7.479072e+000	0	0	0	0	0	0	0.55994	0	0	45.1352	29.0505
DATA	163	2	78	66	1	DarkCorner	DarkCorner	8707.86	197.971	3.682490e+000	3.686841e+000	65	29	7.488192e+000	0	0	0	0	0	0	2.88475	0	0	46.8651	29.5025
DATA	164	2	79	66	1	DarkCorner	DarkCorner	8733.5	198	3.700947e+000	3.687553e+000	59	28	6.834213e+000	0	0	0	0	0	0	-1.88195	0	0	54.1152	29.2081
DATA	165	2	80	66	1	DarkCorner	DarkCorner	8758.88	197.903	3.719235e+000	3.706001e+000	59	30	8.723533e+000	0	0	0	0	0	0	0.324286	0	0	46.8651	30.5517
DATA	166	2	81	66	1	DarkCorner	DarkCorner	8784.2	197.838	5.634452e+000	3.766159e+000	66	30	8.182722e+000	0	0	0	0	0	0	4.44119	1	0	47.8731	30
DATA	167	2	82	66	1	DarkCorner	DarkCorner	8809.57	197.987	3.754942e+000	3.747939e+000	62	31	8.731932e+000	0	0	0	0	0	0	1.7424	0	0	49.8279	31.3131
DATA	168	2	83	66	1	DarkCorner	DarkCorner	8834.65	198.012	5.522084e+000	3.799033e+000	63	30	7.041061e+000	0	0	0	0	0	0	4.31219	1	0	49.8279	30.1186
DATA	169	2	84	66	1	DarkCorner	DarkCorner	8860.5	198	7.438132e+000	3.848918e+000	67	30	8.111939e+000	0	0	0	0	0	0	5.78124	1	0	54.1152	31.4184
DATA	170	2	85	260	1	GE_BrightCorner	GE_BrightCorner	8885.5	198	5.759785e+004	5.759786e+003	44350	29	8.625966e+000	0	0	0	0	0	0	44568.9	1	1	54.1152	29.4462
DATA	171	3	1	66	1	DarkCorner	DarkCorner	6739.91	203.935	1.059695e+001	3.447931e+000	73.5	27	7.063064e+000	0	0	0	1	0	0	9.47979	1	0	65	27.4751
DATA	172	3	2	66	1	DarkCorner	DarkCorner	6765.5	204	8.652559e+000	3.369709e+000	70	31	9.012766e+000	0	0	0	1	0	0	7.79819	1	0	54.1152	31.193
DATA	173	3	3	66	1	DarkCorner	DarkCorner	6790.24	204.032	7.544881e+000	3.321377e+000	69	30	8.316863e+000	0	0	0	1	0	0	6.84651	1	0	45.4864	30.2979
DATA	174	3	4	66	1	DarkCorner	DarkCorner	6816.15	203.93	3.224446e+000	3.216214e+000	63	30.5	8.515035e+000	0	0	0	0	0	0	1.35804	0	0	46.8651	32.0484
DATA	175	3	5	66	1	DarkCorner	DarkCorner	6841.42	203.81	3.204427e+000	3.204435e+000	63	30	8.762967e+000	0	0	0	0	0	0	2.5047	0	0	49.5074	31.6271
DATA	176	3	6	66	1	DarkCorner	DarkCorner	6866.61	204.069	3.185310e+000	3.173782e+000	63	28	6.925008e+000	0	0	0	0	0	0	-0.612215	0	0	53.8203	29.0755
DATA	177	3	7	66	1	DarkCorner	DarkCorner	6892.43	204.154	3.167106e+000	3.155645e+000	57.5	29	9.336919e+000	0	0	0	0	0	0	-4.28654	0	0	44.7812	31.1463
DATA	178	3	8	66	1	DarkCorner	DarkCorner	6917.51	203.76	3.151014e+000	3.139611e+000	57	31	6.773488e+000	0	0	0	0	0	0	-3.54595	0	0	48.5334	30.8364
DATA	179	3	9	66	1	DarkCorner	DarkCorner	6942.6	203.951	3.135464e+000	3.124116e+000	56.5	28	8.126819e+000	0	0	0	0	0	0	-5.71513	0	0	49.8279	28.4493
DATA	180	3	10	66	1	DarkCorner	DarkCorner	6969.48	203.974	3.120160e+000	3.108868e+000	46	25	7.627059e+000	0	0	0	1	0	0	-15.7734	0	0	49.5074	26.2658
DATA	181	3	11	0	0	A_64_P269465	ENSRNOT00000055742	6993.77	204.19	1.721733e+001	3.542482e+000	81	32.5	9.257449e+000	0	0	0	0	0	0	16.3232	1	1	50.1463	33.2083
DATA	182	3	12	0	0	A_64_P140776	NM_001114502	7018.93	204.2	8.142125e+003	8.142184e+002	7584	35	9.082049e+000	0	0	0	0	0	0	7749.84	1	1	46.8651	35.8197
DATA	183	3	13	0	0	A_42_P662683	NM_001108855	7044.59	203.908	1.932427e+004	1.932430e+003	17861	33	8.557350e+000	0	0	0	0	0	0	18460.2	1	1	49.1849	32.5893
DATA	184	3	14	0	0	A_44_P308687	NM_181389	7070.14	204	1.810660e+002	1.836369e+001	231	30	9.097434e+000	0	0	0	0	0	0	173.562	1	1	49.1849	30.4821
DATA	185	3	15	0	0	A_42_P705255	NM_078622	7095.23	204.116	1.587250e+002	1.616339e+001	210	36	1.027335e+001	0	0	0	0	0	0	152.614	1	1	46.5243	36.3966
DATA	186	3	16	0	0	A_44_P142472	NM_001106072	7120.8	204.239	1.061157e+004	1.061162e+003	10024	29	7.539699e+000	0	0	0	0	0	0	10231.9	1	1	46.8651	29.4118
DATA	187	3	17	0	0	A_64_P015946	NM_001009720	7146.29	204.312	1.151174e+003	1.151575e+002	1163.5	28	5.785038e+000	0	0	0	0	0	0	1112.78	1	1	49.8279	29.3333
DATA	188	3	18	0	0	A_64_P118698	ENSRNOT00000050943	7171.12	204.342	5.242511e+001	6.055078e+000	111.5	29	8.758224e+000	0	0	0	0	0	0	50.7864	1	1	49.5074	30.3571
DATA	189	3	19	0	0	A_42_P705302	NM_001107361	7196.81	204.357	7.824288e+003	7.824346e+002	7370	32	6.971899e+000	0	0	0	0	0	0	7594.53	1	1	51.4001	32.7586
DATA	190	3	20	0	0	A_64_P097547	NM_001100528	7222.31	204.189	6.804883e+001	7.444544e+000	128	30	7.334421e+000	0	0	0	0	0	0	66.1573	1	1	48.8603	31.7451
DATA	191	3	21	0	0	A_42_P815485	NM_001013908	7247.44	204.027	1.255630e+004	1.255634e+003	12103	31	8.066725e+000	0	0	0	0	0	0	12223.5	1	1	48.5334	33.2281
DATA	192	3	22	0	0	A_42_P526728	ENSRNOT00000060758	7273.01	204.103	2.943691e+003	2.943845e+002	2873	33	7.545533e+000	0	0	0	0	0	0	2868.95	1	1	46.8651	32.2857
DATA	193	3	23	0	0	A_42_P692317	NM_001107565	7298.58	204.427	1.013767e+003	1.014214e+002	1038.5	28	9.184303e+000	0	0	0	0	0	0	988.962	1	1	57.5363	30.34
DATA	194	3	24	0	0	A_44_P383949	NM_175593	7324	204.455	3.740167e+001	4.799008e+000	97	29	6.366395e+000	0	0	0	0	0	0	36.5088	1	1	55.8519	29.766
DATA	195	3	25	0	0	A_42_P589570	NM_001014105	7349.41	204.4	3.368394e+002	3.381779e+001	383	32	6.825633e+000	0	0	0	0	0	0	328.911	1	1	49.5074	31.617
DATA	196	3	26	0	0	A_64_P012384	NM_001039338	7374.58	204.427	1.123476e+002	1.162984e+001	167.5	32	6.883570e+000	0	0	0	0	0	0	109.716	1	1	57.5363	31.7647
DATA	197	3	27	0	0	A_64_P088612	NM_053871	7399.68	204.605	6.132074e+003	6.132147e+002	5836	34	5.978541e+000	0	0	0	0	0	0	5988.01	1	1	49.5074	33.725
DATA	198	3	28	0	0	A_42_P668072	NM_013130	7425.5	204.5	2.239805e+002	2.259899e+001	280	32.5	7.519714e+000	0	0	0	0	0	0	218.634	1	1	57.5363	33.0833
DATA	199	3	29	0	0	A_44_P624451	NM_001134605	7450.89	204.5	9.957230e+001	1.040186e+001	157	35	1.013358e+001	0	0	0	0	0	0	97.1389	1	1	56.9804	34.38
DATA	200	3	30	0	0	A_64_P118502	A_64_P118502	7476.42	204.427	2.590559e+002	2.608001e+001	312.5	33	7.530345e+000	0	0	0	0	0	0	252.516	1	1	57.5363	32.7925
DATA	201	3	31	0	0	A_43_P15761	NM_031608	7501.58	204.427	1.445174e+002	1.476273e+001	199	31	7.381566e+000	0	0	0	0	0	0	140.727	1	1	57.5363	30.766
DATA	202	3	32	0	0	A_42_P667696	NM_001191800	7527.11	204.5	2.004146e+003	2.004373e+002	1995	30	5.978545e+000	0	0	0	0	0	0	1949.2	1	1	56.9804	29.3478
DATA	203	3	33	0	0	A_44_P899121	NM_001079941	7552.37	204.36	6.015280e+003	6.015356e+002	5791.5	31	8.978318e+000	0	0	0	0	0	0	5841.79	1	1	48.8603	32.902
DATA	204	3	34	0	0	A_42_P642757	NM_031235	7577.5	204.5	6.209920e+003	6.209994e+002	5882	34.5	8.457235e+000	0	0	0	0	0	0	6021.26	1	1	49.1849	34.5833
DATA	205	3	35	0	0	A_64_P066694	NM_001033898	7603.42	204.427	4.542549e+001	5.461945e+000	99.5	33	7.408606e+000	0	0	0	0	0	0	43.9624	1	1	57.5363	31.8478
DATA	206	3	36	0	0	A_42_P699201	TC594545	7628.58	204.427	4.320046e+001	5.281841e+000	103	31	6.171561e+000	0	0	0	0	0	0	41.7253	1	1	65	31.56
DATA	207	3	37	0	0	A_42_P591944	NM_172093	7654.11	204.5	1.624602e+002	1.652904e+001	220	30	7.248421e+000	0	0	0	0	0	0	156.568	1	1	56.9804	31.9804
DATA	208	3	38	0	0	A_44_P115293	NM_001108294	7679.5	204.5	1.478988e+002	1.510168e+001	203	30	6.918472e+000	0	0	0	0	0	0	142.195	1	1	57.5363	30.4167
DATA	209	3	39	1028	1	(+)E1A_r60_a107	E1A_r60_a107	7704.67	204.5	1.924538e+001	3.615444e+000	79	32	7.295588e+000	0	0	0	0	0	0	18.4562	1	1	65	32.587
DATA	210	3	40	0	0	A_44_P194531	NM_001007742	7730.33	204.5	2.285337e+002	2.305854e+001	276.5	33	8.902787e+000	0	0	0	0	0	0	218.559	1	1	57.5363	32.7963
DATA	211	3	41	0	0	A_43_P20016	NM_001107377	7755.48	204.636	1.116337e+002	1.157988e+001	165.5	32.5	7.979493e+000	0	0	0	0	0	0	106.46	1	1	49.8279	33.0455
DATA	212	3	42	0	0	A_64_P105550	A_64_P105550	7781.11	204.5	1.229302e+002	1.267479e+001	180.5	31.5	8.772635e+000	0	0	0	0	0	0	116.869	1	1	56.9804	31.7222
DATA	213	3	43	0	0	A_42_P791872	NM_001135174	7806.26	204.711	1.146181e+004	1.146186e+003	10461.5	31	7.761357e+000	0	0	0	0	0	0	10862.7	1	1	49.5074	31.9787
DATA	214	3	44	0	0	A_42_P499273	NM_001012148	7831.69	204.662	3.049957e+003	3.050115e+002	2844.5	33	8.485189e+000	0	0	0	0	0	0	2880.83	1	1	48.5334	32.9608
DATA	215	3	45	0	0	A_64_P021960	NM_001109493	7857.24	204.333	5.295243e+002	5.304418e+001	560	33	1.261337e+001	0	0	0	0	0	0	498.369	1	1	49.1849	34.5968
DATA	216	3	46	0	0	A_64_P083725	A_64_P083725	7882.58	204.573	1.222141e+005	1.222142e+004	115325	38	1.119691e+001	0	0	0	0	0	0	114615	1	1	57.5363	39.3556
DATA	217	3	47	0	0	A_42_P524536	NM_012698	7907.74	204.618	3.592019e+002	3.605729e+001	395.5	32	9.201952e+000	0	0	0	0	0	0	335.62	1	1	49.1849	33.24
DATA	218	3	48	0	0	A_64_P151675	NM_175755	7933.16	204.691	9.538878e+001	1.004664e+001	150	31	9.808763e+000	0	0	0	0	0	0	88.7827	1	1	45.835	31.5106
DATA	219	3	49	0	0	A_64_P146914	A_64_P146914	7958.82	204.589	1.550695e+003	1.551019e+002	1469.5	30	7.726948e+000	0	0	0	0	0	0	1437.45	1	1	52.6241	31.3273
DATA	220	3	50	0	0	A_64_P115065	NM_001109631	7984.42	204.573	1.309600e+001	3.438703e+000	74	32	9.073080e+000	0	0	0	0	0	0	12.0893	1	0	65	31.1373
DATA	221	3	51	0	0	A_42_P468771	NM_001107362	8009.56	204.973	3.724538e+003	3.724675e+002	3433	34	1.132922e+001	0	0	0	0	0	0	3424.24	1	1	48.5334	36.7317
DATA	222	3	52	0	0	A_44_P226461	NM_053798	8034.63	204.873	1.530108e+003	1.530444e+002	1401	31.5	9.147318e+000	0	0	0	0	0	0	1400.71	1	1	47.5395	30.5652
DATA	223	3	53	0	0	A_64_P009440	NM_001109313	8060.55	204.466	1.294504e+002	1.333978e+001	180.5	31	8.362618e+000	0	0	0	0	0	0	117.958	1	1	49.1849	31.2203
DATA	224	3	54	0	0	A_44_P282433	NM_033230	8085.63	204.64	5.462652e+002	5.472224e+001	555	28	7.322522e+000	0	0	0	0	0	0	495.577	1	1	48.8603	28.7391
DATA	225	3	55	0	0	A_42_P461003	NM_001044283	8110.93	204.718	1.584257e+004	1.584260e+003	14190	31	9.696158e+000	0	0	0	0	0	0	14307.1	1	1	47.2035	31.9455
DATA	226	3	56	0	1	ETG10_236652	ETG10_236652	8136.5	204.648	1.246380e+001	3.495333e+000	73	32	8.412161e+000	0	0	0	0	0	0	11.2027	1	0	65	32.8367
DATA	227	3	57	0	0	A_42_P529780	NM_138855	8161.89	204.88	1.134261e+003	1.134735e+002	1061	28.5	7.937056e+000	0	0	0	1	0	0	1014.72	1	1	47.8731	30.6111
DATA	228	3	58	0	0	A_42_P492976	NM_001126099	8187.28	204.84	3.682156e+002	3.696886e+001	380	30	8.086145e+000	0	0	0	0	0	0	327.823	1	1	49.1849	30.7885
DATA	229	3	59	0	0	A_42_P533865	NM_001127650	8212.58	204.573	3.157986e+001	4.577090e+000	88.5	30	7.307552e+000	0	0	0	0	0	0	27.977	1	1	57.5363	29.9032
DATA	230	3	60	0	0	A_64_P026399	NM_001007626	8238.37	204.596	1.227666e+003	1.228118e+002	1121	29	6.617267e+000	0	0	0	0	0	0	1082.17	1	1	57.8122	30.1228
DATA	231	3	61	0	0	A_64_P152543	XM_221353	8263.32	204.618	1.400835e+004	1.400839e+003	12288.5	29	7.966794e+000	0	0	0	0	0	0	12287.7	1	1	46.5243	29.8036
DATA	232	3	62	0	0	A_44_P203195	NM_053585	8288.59	204.831	1.034359e+003	1.034906e+002	951.5	31.5	8.316155e+000	0	0	0	0	0	0	902.818	1	1	47.5395	30.0714
DATA	233	3	63	0	0	A_42_P490612	NM_001108262	8314.09	204.896	1.040689e+004	1.040695e+003	8707	29	8.598318e+000	0	0	0	0	0	0	9037.33	1	1	46.8651	29.8772
DATA	234	3	64	0	0	A_44_P457548	NM_001103351	8339.5	205	1.224640e+002	1.270887e+001	167	29	8.000049e+000	0	0	0	0	0	0	105.807	1	1	54.1152	29.1961
DATA	235	3	65	0	0	A_42_P755665	NM_001013154	8364.79	204.806	2.758207e+003	2.758418e+002	2292	30	8.472657e+000	0	0	0	0	0	0	2370.73	1	1	47.5395	30.4151
DATA	236	3	66	0	0	A_42_P781999	NM_001106378	8390.59	204.908	2.824355e+004	2.824357e+003	23731.5	29	6.071955e+000	0	0	0	0	0	0	24149.3	1	1	49.1849	29.1489
DATA	237	3	67	0	0	A_44_P100289	ENSRNOT00000049514	8415.61	204.931	8.138159e+001	8.839377e+000	131	32.5	8.684149e+000	0	0	0	0	0	0	69.2297	1	1	53.8203	33.7708
DATA	238	3	68	0	0	A_42_P629599	ENSRNOT00000023101	8441.09	204.896	9.967672e+002	9.973704e+001	865	30	8.812372e+000	0	0	0	1	0	0	843.504	1	1	46.8651	31.5
DATA	239	3	69	0	0	A_44_P192083	NM_001047088	8466.66	204.877	6.045714e+001	6.979110e+000	114	32.5	9.616207e+000	0	0	0	0	0	0	50.8931	1	1	48.5334	32.5357
DATA	240	3	70	0	0	A_42_P498066	NM_031136	8492	205	9.267142e+004	9.267142e+003	77794	31	9.833363e+000	0	0	0	0	0	0	77609.3	1	1	54.9904	32.3333
DATA	241	3	71	0	0	A_42_P519910	NM_001106292	8517.31	204.986	3.356282e+004	3.356284e+003	27279	30.5	9.016509e+000	0	0	0	1	0	0	27962.1	1	1	47.2035	32.3542
DATA	242	3	72	0	0	A_42_P657538	NM_001008362	8542.79	204.806	4.455612e+003	4.455752e+002	3646	28	7.630063e+000	0	0	0	0	0	0	3692.57	1	1	47.5395	29.4821
DATA	243	3	73	0	0	A_64_P030630	NM_001109610	8568.5	205	5.546585e+003	5.546699e+002	4561	31	6.932967e+000	0	0	0	0	0	0	4572.92	1	1	48.5334	30.8333
DATA	244	3	74	0	0	A_44_P126366	NM_001017456	8593.73	205.164	6.187064e+001	7.147267e+000	114	29	4.664966e+000	0	0	0	0	0	0	50.7514	1	1	48.2044	29
DATA	245	3	75	0	0	A_43_P15627	ENSRNOT00000067029	8619	205	4.556066e+001	5.804673e+000	100	29	6.439720e+000	0	0	0	0	0	0	37.1803	1	1	54.9904	29.0781
DATA	246	3	76	0	0	A_42_P754784	CB328432	8644.75	205	7.247972e+003	7.248062e+002	5708	29	5.892290e+000	0	0	0	0	0	0	5884.28	1	1	49.1849	29.2115
DATA	247	3	77	66	1	DarkCorner	DarkCorner	8669.59	205.159	3.646344e+000	3.633147e+000	55.5	26.5	5.937438e+000	0	0	0	0	0	0	-4.44813	0	0	47.2035	26.8409
DATA	248	3	78	66	1	DarkCorner	DarkCorner	8695.49	205.045	3.665180e+000	3.651915e+000	58	30	9.205011e+000	0	0	0	0	0	0	-1.69959	0	0	46.1809	30.8679
DATA	249	3	79	66	1	DarkCorner	DarkCorner	8720.57	205.091	3.683143e+000	3.669813e+000	58	28	5.922323e+000	0	0	0	0	0	0	-2.63501	0	0	49.1849	28.1538
DATA	250	3	80	66	1	DarkCorner	DarkCorner	8746.26	205.227	3.701312e+000	3.687917e+000	57	32	7.734575e+000	0	0	0	0	0	0	-4.20055	0	0	45.4864	33.0566
DATA	251	3	81	66	1	DarkCorner	DarkCorner	8771.33	205.371	3.718886e+000	3.712282e+000	63.5	28.5	9.146070e+000	0	0	0	0	0	0	1.78611	0	0	47.2035	29.5185
DATA	252	3	82	66	1	DarkCorner	DarkCorner	8796.86	205.099	3.737135e+000	3.723610e+000	59	29	7.293116e+000	0	0	0	0	0	0	-2.19241	0	0	49.8279	29.7833
DATA	253	3	83	66	1	DarkCorner	DarkCorner	8822.37	205.294	3.754585e+000	3.740997e+000	55.5	29	7.644227e+000	0	0	0	0	0	0	-2.00286	0	0	46.5243	29.6842
DATA	254	3	84	66	1	DarkCorner	DarkCorner	8847.81	205.111	3.772246e+000	3.758933e+000	61	29	9.301702e+000	0	0	0	0	0	0	0.393785	0	0	47.2035	32.6852
DATA	255	3	85	66	1	DarkCorner	DarkCorner	8872.91	205.065	1.081640e+001	3.927433e+000	69	29	9.946453e+000	0	0	0	1	0	0	8.40878	1	0	54.4085	31.1833
DATA	256	4	1	66	1	DarkCorner	DarkCorner	6752.41	211.526	5.803063e+000	3.312316e+000	67.5	26.5	8.040956e+000	0	0	0	0	0	0	5.22307	1	0	49.8279	28.75
DATA	257	4	2	66	1	DarkCorner	DarkCorner	6778	211.455	4.950063e+000	3.275384e+000	68	28	7.632169e+000	0	0	0	0	0	0	4.48741	1	0	55.8519	28.6
DATA	258	4	3	66	1	DarkCorner	DarkCorner	6803.5	211.5	3.227411e+000	3.215731e+000	62	30.5	8.896872e+000	0	0	0	0	0	0	-0.110294	0	0	57.5363	32.0909
DATA	259	4	4	66	1	DarkCorner	DarkCorner	6828.67	211.5	3.206893e+000	3.195287e+000	61	32	1.119795e+001	0	0	0	0	0	0	-1.41842	0	0	57.5363	34.4138
DATA	260	4	5	66	1	DarkCorner	DarkCorner	6854.33	211.5	4.904915e+000	3.213340e+000	67	28	7.200335e+000	0	0	0	0	0	0	4.53341	1	0	57.5363	28.5
DATA	261	4	6	66	1	DarkCorner	DarkCorner	6880.01	211.329	3.168921e+000	3.157452e+000	61	28	6.054098e+000	0	0	0	0	0	0	-3.38853	0	0	46.5243	29.7714
DATA	262	4	7	66	1	DarkCorner	DarkCorner	6905.09	211.136	3.152219e+000	3.140811e+000	58.5	28	8.202337e+000	0	0	0	0	0	0	-5.06717	0	0	46.1809	29.7241
DATA	263	4	8	66	1	DarkCorner	DarkCorner	6930.68	211.518	3.135789e+000	3.124441e+000	59	29	7.224209e+000	0	0	0	0	0	0	-2.56977	0	0	51.7088	29.7568
DATA	264	4	9	66	1	DarkCorner	DarkCorner	6955.81	212.015	3.120639e+000	3.109346e+000	49.5	23.5	7.244986e+000	0	0	0	0	0	0	-11.9407	0	0	46.8651	25.5192
DATA	265	4	10	0	0	A_44_P807031	NM_001108921	6981	211.5	7.233647e+003	7.233714e+002	6799	29.5	9.671290e+000	0	0	0	0	0	0	6857.49	1	1	51.0895	30.5769
DATA	266	4	11	0	0	A_64_P025813	NM_001009379	7006.5	211.5	5.586965e+000	3.133591e+000	67.5	32.5	6.162161e+000	0	0	0	0	0	0	5.31838	1	0	57.5363	31.75
DATA	267	4	12	0	0	A_64_P130551	XM_001081846	7031.89	211.5	1.707716e+001	3.514466e+000	79	35.5	9.620318e+000	0	0	0	0	0	0	16.3182	1	1	65	35.7143
DATA	268	4	13	0	0	A_42_P715449	NM_001033709	7057.42	211.573	2.297858e+003	2.298061e+002	2185	35	1.131133e+001	0	0	0	1	0	0	2203.51	1	1	57.5363	35.2903
DATA	269	4	14	0	0	A_42_P727584	NM_031622	7082.57	211.392	5.475199e+003	5.475284e+002	5177	38	1.166790e+001	0	0	0	0	0	0	5266.78	1	1	49.1849	38.84
DATA	270	4	15	0	0	A_42_P600642	NM_001008386	7108.11	211.5	3.057046e+002	3.072147e+001	349	33	6.522489e+000	0	0	0	0	0	0	294.936	1	1	56.9804	32.1667
DATA	271	4	16	0	0	A_42_P669103	NM_001108329	7133.2	211.386	1.590646e+003	1.590935e+002	1552	30	5.460119e+000	0	0	0	0	0	0	1538.53	1	1	47.2035	29.7097
DATA	272	4	17	0	0	A_44_P715330	NM_001024966	7158.56	211.74	7.089695e+002	7.096155e+001	723	24	5.929068e+000	0	0	0	0	0	0	687.402	1	1	49.5074	24.3333
DATA	273	4	18	0	0	A_64_P083185	NM_001107199	7184.16	211.779	6.505522e+002	6.512532e+001	663.5	30.5	8.283362e+000	0	0	0	0	0	0	632.071	1	1	49.5074	31.1471
DATA	274	4	19	0	0	A_64_P037313	ENSRNOT00000030164	7209.58	211.573	2.160378e+001	3.709742e+000	83	30.5	5.893934e+000	0	0	0	0	0	0	21.0262	1	1	57.5363	30.4615
DATA	275	4	20	0	0	A_44_P321009	NM_012540	7235.05	211.523	1.515787e+001	3.371273e+000	78.5	30	7.646772e+000	0	0	0	0	0	0	14.7746	1	1	55.8519	31.1613
DATA	276	4	21	0	0	A_42_P700753	FQ212883	7260.12	211.384	2.628511e+003	2.628683e+002	2565.5	30	6.734564e+000	0	0	0	0	0	0	2565.09	1	1	48.5334	31.0811
DATA	277	4	22	0	0	A_44_P775974	NM_001024363	7285.58	211.573	5.758908e+000	3.059330e+000	67.5	30	7.845140e+000	0	0	0	0	0	0	5.62572	1	0	57.5363	30.4286
DATA	278	4	23	0	0	A_44_P503868	A_44_P503868	7311.44	211.521	2.578646e+003	2.578821e+002	2566	28	6.234268e+000	0	0	0	0	0	0	2520.82	1	1	48.2044	27.5926
DATA	279	4	24	0	0	A_64_P122541	A_64_P122541	7336.69	211.479	3.148232e+002	3.162504e+001	378	31	6.190315e+000	0	0	0	0	0	0	307.904	1	1	48.5334	30
DATA	280	4	25	0	0	A_64_P080967	NM_001033890	7361.91	211.701	1.548920e+004	1.548923e+003	14651	33	6.804523e+000	0	0	0	0	0	0	15153	1	1	49.5074	32.6923
DATA	281	4	26	0	0	A_44_P1056309	NM_001105912	7387.5	211.648	2.886567e+001	4.163461e+000	89	33	7.772816e+000	0	0	0	0	0	0	28.2383	1	1	57.5363	32.6
DATA	282	4	27	0	0	A_44_P199514	NM_001005564	7412.49	211.778	3.218376e+003	3.218516e+002	3097	34	8.029954e+000	0	0	0	0	0	0	3147.77	1	1	47.8731	33.5357
DATA	283	4	28	0	0	A_64_P097952	NM_001134962	7437.89	212.035	5.523989e+001	6.287116e+000	115	32	7.630313e+000	0	0	0	0	0	0	54.0057	1	1	43.3362	32.3103
DATA	284	4	29	0	0	A_42_P813939	NM_001108741	7463.31	211.662	3.094419e+003	3.094564e+002	3060.5	31	7.637540e+000	0	0	0	0	0	0	3022.9	1	1	48.5334	32.0357
DATA	285	4	30	0	0	A_64_P006423	NM_012584	7489	211.545	2.294577e+001	3.782849e+000	85	31	6.155485e+000	0	0	0	0	0	0	22.394	1	1	55.8519	31.84
DATA	286	4	31	0	0	A_42_P670614	NM_001107097	7514.34	211.909	8.797338e+003	8.797389e+002	8394	31	8.351711e+000	0	0	0	0	0	0	8576.87	1	1	49.1849	30.6818
DATA	287	4	32	0	0	A_64_P084088	NM_001011954	7539.61	211.931	2.676883e+002	2.693804e+001	308.5	31	8.900389e+000	0	0	0	0	0	0	260.634	1	1	53.8203	31.5714
DATA	288	4	33	0	0	A_64_P025643	XM_001073566	7565.23	212.099	3.799624e+002	3.811601e+001	431	33	8.725912e+000	0	0	0	0	0	0	369.39	1	1	46.8651	31.6923
DATA	289	4	34	0	0	A_42_P719607	NM_153721	7590.56	212.141	3.366502e+001	4.525501e+000	93	35	6.320500e+000	0	0	0	0	0	0	32.6719	1	1	49.5074	34.5556
DATA	290	4	35	0	0	A_42_P843603	NM_052800	7615.5	212	4.723310e+002	4.733020e+001	520.5	32	7.306353e+000	0	0	0	0	0	0	457.515	1	1	48.5334	32.129
DATA	291	4	36	0	0	A_44_P234129	NM_001135802	7641.21	212.194	1.830086e+002	1.855107e+001	241	31.5	1.083222e+001	0	0	0	0	0	0	176.897	1	1	47.5395	33.7647
DATA	292	4	37	0	0	A_42_P701161	NM_001033666	7666.63	211.873	9.071449e+003	9.071500e+002	8567	32	8.070381e+000	0	0	0	0	0	0	8747.73	1	1	47.5395	31.8519
DATA	293	4	38	0	0	A_44_P1017335	NM_001108607	7692.35	211.882	1.174701e+004	1.174705e+003	11109	33	8.756331e+000	0	0	0	0	0	0	11299.5	1	1	50.1463	33.56
DATA	294	4	39	0	0	A_44_P900209	CV121387	7717.43	212.059	1.206515e+002	1.244696e+001	176	33	7.785680e+000	0	0	0	0	0	0	115.758	1	1	46.5243	33.1714
DATA	295	4	40	0	0	A_64_P037517	ENSRNOT00000014921	7743	212	3.071509e+001	4.341246e+000	92	35	8.983839e+000	0	0	0	0	0	0	29.3857	1	1	54.9904	33.931
DATA	296	4	41	0	0	A_64_P128528	NM_001106013	7768	212	3.755087e+003	3.755213e+002	3600	33.5	9.368304e+000	0	0	0	0	0	0	3582.09	1	1	46.8651	34.9063
DATA	297	4	42	0	0	A_64_P378865	NM_001000706	7793.44	211.973	1.109171e+002	1.151316e+001	170	33	7.505553e+000	0	0	0	0	0	0	105.476	1	1	48.5334	32.5556
DATA	298	4	43	0	0	A_42_P553960	NM_001107831	7818.93	212.2	1.330548e+004	1.330551e+003	12395.5	33.5	8.243243e+000	0	0	0	0	0	0	12612.1	1	1	46.8651	35.6071
DATA	299	4	44	0	0	A_42_P717654	XM_001063683	7844.17	212	4.743928e+003	4.744029e+002	4449	34	9.041529e+000	0	0	0	0	0	0	4481.27	1	1	46.8651	34.027
DATA	300	4	45	0	0	A_44_P295118	NM_001107228	7870	212	3.122319e+002	3.137853e+001	349	34.5	1.083895e+001	0	0	0	0	0	0	293.882	1	1	54.9904	35.4688
DATA	301	4	46	0	0	A_64_P049057	ENSRNOT00000014519	7895	212	1.538368e+003	1.538686e+002	1478	34	1.074814e+001	0	0	0	0	0	0	1442.72	1	1	46.8651	37.5484
DATA	302	4	47	0	0	A_42_P810287	NM_001004107	7920.57	211.988	2.742135e+003	2.742315e+002	2510	32	1.090970e+001	0	0	0	0	0	0	2561.79	1	1	49.8279	33.6923
DATA	303	4	48	0	0	A_42_P702729	NM_001107557	7945.91	211.896	1.921616e+003	1.921875e+002	1859	32.5	7.560940e+000	0	0	0	0	0	0	1788.17	1	1	46.8651	33.0667
DATA	304	4	49	0	0	A_42_P811084	NM_173147	7971.27	212.219	2.923554e+003	2.923725e+002	2733.5	31.5	8.368518e+000	0	0	0	0	0	0	2709.78	1	1	48.2044	31.2941
DATA	305	4	50	0	0	A_64_P151473	A_64_P151473	7996.91	212.065	5.812715e+004	5.812716e+003	53089	34.5	1.448206e+001	0	0	0	0	0	0	53649.2	1	1	54.4085	39.2143
DATA	306	4	51	0	0	A_44_P134634	ENSRNOT00000000260	8021.96	212.043	1.306766e+002	1.345223e+001	180	35	1.119430e+001	0	0	0	0	0	0	120.103	1	1	46.8651	34.6957
DATA	307	4	52	0	0	A_44_P178479	NM_001135039	8047.7	212.173	8.941131e+002	8.946883e+001	860.5	32	8.679147e+000	0	0	0	0	0	0	818.171	1	1	49.8279	33.4483
DATA	308	4	53	0	0	A_64_P317400	ENSRNOT00000068382	8073.04	212.203	1.766214e+001	3.674214e+000	79	32	7.947031e+000	0	0	0	0	0	0	16.0904	1	1	46.8651	31.0303
DATA	309	4	54	0	0	A_42_P781735	NM_053319	8098.5	212	1.011356e+005	1.011356e+004	92474	32.5	1.244961e+001	0	0	0	0	0	0	91712.6	1	1	54.1152	34.9167
DATA	310	4	55	0	0	A_64_P144869	NM_017131	8123.8	211.719	3.077551e+002	3.094684e+001	335	34	1.108254e+001	0	0	0	0	0	0	277.778	1	1	45.1352	36.4138
DATA	311	4	56	0	0	A_44_P445484	ENSRNOT00000049980	8149.06	211.825	9.130593e+002	9.136437e+001	874	31	7.837873e+000	0	0	0	0	0	0	820.297	1	1	45.4864	31.9677
DATA	312	4	57	0	0	A_42_P487832	NM_001108389	8174.6	212.156	2.450699e+003	2.450919e+002	2133	33	8.448968e+000	0	0	0	0	0	0	2191.37	1	1	49.8279	33.1667
DATA	313	4	58	0	0	A_42_P482829	NM_001108138	8199.86	212.297	8.947662e+002	8.953738e+001	832	30.5	1.107630e+001	0	0	0	0	0	0	796.269	1	1	48.8603	33.6563
DATA	314	4	59	0	0	A_64_P101440	XM_001065775	8225.88	212.556	3.326629e+000	3.314590e+000	63	31	7.365307e+000	0	0	0	0	0	0	0.0114813	0	0	50.4627	32.4054
DATA	315	4	60	0	0	A_64_P072268	NM_001002277	8250.68	212.382	9.375478e+002	9.381393e+001	899	33	7.664114e+000	0	0	0	0	0	0	826.176	1	1	46.5243	32.6364
DATA	316	4	61	0	0	A_42_P589190	NM_023104	8276.42	212.427	1.056512e+003	1.057043e+002	975.5	32	7.962362e+000	0	0	0	0	0	0	926.31	1	1	57.5363	29.9722
DATA	317	4	62	0	0	A_64_P027328	A_64_P027328	8301.58	212.427	4.053841e+002	4.067779e+001	423	32.5	1.027441e+001	0	0	0	0	0	0	353.652	1	1	57.5363	31.4583
DATA	318	4	63	0	0	A_42_P788541	NM_001106794	8326.74	212.348	6.711929e+003	6.712014e+002	5647	33	8.190946e+000	0	0	0	1	0	0	5825.86	1	1	47.2035	33.2703
DATA	319	4	64	0	0	A_42_P457003	NM_012802	8352.03	212.061	5.826837e+003	5.826936e+002	4757	30	8.191020e+000	0	0	0	0	0	0	5031.5	1	1	46.8651	30.303
DATA	320	4	65	0	0	A_64_P095695	A_64_P095695	8377.61	212.045	1.072251e+002	1.125374e+001	152	29	7.052294e+000	0	0	0	0	0	0	92.1104	1	1	45.835	30.7879
DATA	321	4	66	0	0	A_42_P463880	NM_001013927	8403.16	212.137	5.923511e+001	6.847175e+000	113	32.5	9.083839e+000	0	0	0	0	0	0	50.6227	1	1	47.5395	34.25
DATA	322	4	67	0	0	A_43_P20354	NM_001134574	8428.43	212.311	1.319753e+002	1.364155e+001	172	31.5	9.336617e+000	0	0	0	0	0	0	112.213	1	1	48.5334	33
DATA	323	4	68	0	0	A_64_P055958	ENSRNOT00000056114	8454	212.455	4.167170e+001	5.422762e+000	95	34	1.017466e+001	0	0	0	0	0	0	35.2484	1	1	55.8519	33.9487
DATA	324	4	69	0	0	A_64_P159044	ENSRNOT00000040690	8479.42	212.427	1.085155e+003	1.085716e+002	1003	33	9.273884e+000	0	0	0	0	0	0	913.123	1	1	57.5363	34.8276
DATA	325	4	70	0	0	A_44_P473234	ENSRNOT00000024858	8504.58	212.427	8.719811e+002	8.726857e+001	762	31.5	9.592490e+000	0	0	0	0	0	0	729.979	1	1	57.5363	33.3571
DATA	326	4	71	0	0	A_42_P797965	NM_001108497	8529.95	212.045	1.175541e+003	1.176069e+002	1022	29	9.924583e+000	0	0	0	1	0	0	978.909	1	1	46.8651	31.8571
DATA	327	4	72	0	0	A_42_P592157	NM_001002828	8555.73	212.284	3.981009e+002	3.996744e+001	384	32	7.251903e+000	0	0	0	1	0	0	329.799	1	1	48.8603	31.5135
DATA	328	4	73	0	0	A_64_P016419	NM_001000622	8580.89	212.5	3.772384e+001	5.187587e+000	93.5	31.5	6.844455e+000	0	0	0	0	0	0	31.0945	1	1	65	32.5714
DATA	329	4	74	0	0	A_44_P306863	XM_344447	8605.93	212.268	1.461328e+003	1.461766e+002	1257	29.5	8.522115e+000	0	0	0	0	0	0	1198.37	1	1	47.5395	31.8333
DATA	330	4	75	0	0	A_42_P471835	TC610276	8631.63	212.64	3.626437e+003	3.626615e+002	2887	29	7.399274e+000	0	0	0	0	0	0	2958.91	1	1	48.8603	30.027
DATA	331	4	76	0	1	ETG02_36680	ETG02_36680	8657.11	212.5	8.396687e+000	3.711992e+000	70.5	25	5.867779e+000	0	0	0	0	0	0	6.81611	1	0	65	26.6087
DATA	332	4	77	66	1	DarkCorner	DarkCorner	8682.5	212.5	3.647161e+000	3.633961e+000	57.5	28	9.341433e+000	0	0	0	0	0	0	-2.36676	0	0	57.5363	30.0645
DATA	333	4	78	66	1	DarkCorner	DarkCorner	8707.89	212.5	3.665327e+000	3.652062e+000	56.5	29.5	9.989937e+000	0	0	0	0	0	0	-3.42071	0	0	56.9804	29.8333
DATA	334	4	79	66	1	DarkCorner	DarkCorner	8733.38	212.533	3.683415e+000	3.670084e+000	60	29	6.392467e+000	0	0	0	0	0	0	-2.73774	0	0	42.5954	30.3636
DATA	335	4	80	66	1	DarkCorner	DarkCorner	8758.58	212.573	3.701156e+000	3.690661e+000	58	31	7.223425e+000	0	0	0	0	0	0	1.16427	0	0	57.5363	31.2174
DATA	336	4	81	66	1	DarkCorner	DarkCorner	8784.13	212.846	3.718697e+000	3.705239e+000	59.5	33	8.600567e+000	0	0	0	0	0	0	-1.69802	0	0	49.5074	31.9714
DATA	337	4	82	66	1	DarkCorner	DarkCorner	8809.5	212.5	3.736694e+000	3.723171e+000	59	29.5	8.174826e+000	0	0	0	0	0	0	-1.84331	0	0	57.5363	29.9722
DATA	338	4	83	66	1	DarkCorner	DarkCorner	8835.51	212.803	3.754117e+000	3.740531e+000	58	29	7.960824e+000	0	0	0	0	0	0	-2.72717	0	0	49.8279	30.0667
DATA	339	4	84	66	1	DarkCorner	DarkCorner	8860.58	212.39	5.187962e+000	3.793559e+000	65.5	26	8.402790e+000	0	0	0	0	0	0	4.0521	1	0	49.8279	27.7917
DATA	340	4	85	66	1	DarkCorner	DarkCorner	8885.58	212.573	1.025707e+001	3.911142e+000	68	27	7.264559e+000	0	0	0	0	0	0	7.9767	1	0	57.5363	27.2388
DATA	341	5	1	66	1	DarkCorner	DarkCorner	6739.89	218.5	7.959971e+000	3.361342e+000	70.5	27	6.991524e+000	0	0	0	1	0	0	7.1542	1	0	56.9804	27.3668
DATA	342	5	2	66	1	DarkCorner	DarkCorner	6765.47	219.055	3.253071e+000	3.241373e+000	61.5	27	8.869102e+000	0	0	0	0	0	0	0.199512	0	0	48.5334	29.7407
DATA	343	5	3	66	1	DarkCorner	DarkCorner	6790.58	218.573	3.231343e+000	3.219649e+000	63	31	8.314915e+000	0	0	0	0	0	0	-0.182241	0	0	57.5363	32.2571
DATA	344	5	4	66	1	DarkCorner	DarkCorner	6817.32	218.731	3.208918e+000	3.197305e+000	59	31	7.229031e+000	0	0	0	0	0	0	-2.56886	0	0	49.8279	30.8947
DATA	345	5	5	66	1	DarkCorner	DarkCorner	6841.32	218.619	3.190214e+000	3.178669e+000	61	30	8.005479e+000	0	0	0	0	0	0	-2.60519	0	0	52.0157	29.9063
DATA	346	5	6	66	1	DarkCorner	DarkCorner	6867.17	218.513	3.171260e+000	3.167982e+000	63	27	5.982528e+000	0	0	0	0	0	0	2.11586	0	0	49.8279	26.8276
DATA	347	5	7	66	1	DarkCorner	DarkCorner	6892.29	218.528	3.153894e+000	3.142480e+000	59	32.5	7.859838e+000	0	0	0	0	0	0	-3.51412	0	0	48.2044	32.5909
DATA	348	5	8	66	1	DarkCorner	DarkCorner	6917.35	218.838	3.137418e+000	3.126064e+000	54.5	27	6.119083e+000	0	0	0	0	0	0	-6.19479	0	0	48.8603	27.4545
DATA	349	5	9	66	1	DarkCorner	DarkCorner	6943.1	218.36	3.122322e+000	3.111023e+000	54	28	8.820085e+000	0	0	0	0	0	0	-7.25863	0	0	52.0157	29.3902
DATA	350	5	10	0	0	A_43_P17919	XM_001070979	6968.5	218.648	3.950043e+001	5.019142e+000	98	28	1.092209e+001	0	0	0	0	0	0	37.4409	1	1	57.5363	30.3095
DATA	351	5	11	0	0	A_42_P826221	NM_012933	6993.56	219.232	9.095340e+003	9.095392e+002	8498	30	7.376313e+000	0	0	0	0	0	0	8658.74	1	1	46.8651	31.08
DATA	352	5	12	0	0	A_64_P011524	NM_001194951	7018.7	219.254	7.461930e+002	7.468247e+001	766	36	1.013631e+001	0	0	0	0	0	0	713.153	1	1	45.835	36.2432
DATA	353	5	13	0	0	A_44_P258417	NM_001009699	7044.57	218.622	1.193096e+002	1.231719e+001	176	34	9.728574e+000	0	0	0	0	0	0	114.43	1	1	49.1849	36.25
DATA	354	5	14	0	0	A_64_P164617	A_64_P164617	7070	218.545	6.954558e+004	6.954559e+003	67089	41	1.375444e+001	0	0	0	0	0	0	66922.3	1	1	55.8519	43.4483
DATA	355	5	15	0	0	A_42_P758933	NM_001106476	7095.15	218.836	1.109511e+004	1.109515e+003	10379.5	35	1.040297e+001	0	0	0	0	0	0	10709.5	1	1	47.5395	35.6857
DATA	356	5	16	0	0	A_42_P573312	NM_001134761	7120.57	218.843	8.029637e+002	8.035362e+001	822	33	8.540857e+000	0	0	0	0	0	0	777.185	1	1	47.5395	31.7097
DATA	357	5	17	0	0	A_64_P096257	NM_001160228	7146.24	219	1.032545e+003	1.032988e+002	1041	29	7.092979e+000	0	0	0	0	0	0	1001.91	1	1	46.8651	28.1034
DATA	358	5	18	0	0	A_43_P15847	NM_178847	7171.48	219.055	9.852988e+001	1.030494e+001	156.5	26	8.420916e+000	0	0	0	0	0	0	95.8143	1	1	48.5334	27.6129
DATA	359	5	19	0	0	A_64_P139962	NM_001000675	7197	219	9.414420e+000	3.156328e+000	72	31	6.570197e+000	0	0	0	0	0	0	9.17222	1	0	54.9904	32.1034
DATA	360	5	20	0	0	A_64_P117474	NM_001000646	7221.93	218.853	8.576078e+000	3.127848e+000	72	32	7.252075e+000	0	0	0	0	0	0	8.36844	1	0	46.8651	32
DATA	361	5	21	0	1	ERCC-00075_180	ERCC-00075_180	7247.7	218.9	3.853723e+001	4.886111e+000	102.5	30.5	7.270892e+000	0	0	0	0	0	0	37.6563	1	1	47.2035	31.3611
DATA	362	5	22	0	0	A_42_P740730	NM_001012136	7273.16	218.882	2.838126e+001	4.130163e+000	89.5	31	6.582230e+000	0	0	0	0	0	0	27.7627	1	1	46.5243	31.8421
DATA	363	5	23	0	0	A_42_P702258	NM_017227	7298.56	218.973	3.496839e+001	4.606059e+000	95	29	7.072983e+000	0	0	0	0	0	0	34.2355	1	1	48.5334	29.2069
DATA	364	5	24	0	0	A_42_P668800	NM_001127553	7323.7	218.9	2.024841e+003	2.025063e+002	1964	31	7.022308e+000	0	0	0	0	0	0	1983.52	1	1	47.2035	30.2069
DATA	365	5	25	0	0	A_42_P842513	NM_031077	7349.31	219.014	4.869479e+003	4.869571e+002	4835	31	7.849876e+000	0	0	0	0	0	0	4771.85	1	1	47.2035	31.5652
DATA	366	5	26	0	0	A_64_P047697	NM_001161835	7374.5	219	2.786809e+002	2.802856e+001	338	31	8.126024e+000	0	0	0	0	0	0	273.119	1	1	54.1152	31.9677
DATA	367	5	27	0	0	A_42_P660036	NM_001134727	7399.97	219.135	2.422983e+002	2.441426e+001	292	34.5	9.037784e+000	0	0	0	0	0	0	237.437	1	1	46.8651	35.1923
DATA	368	5	28	0	0	A_64_P095050	A_64_P095050	7425.5	219	7.073731e+004	7.073732e+003	69531.5	31	8.624487e+000	0	0	0	0	0	0	69290.2	1	1	54.1152	32.8966
DATA	369	5	29	0	0	A_42_P561835	ENSRNOT00000043937	7450.46	218.789	2.567577e+002	2.585025e+001	309.5	29.5	7.223923e+000	0	0	0	0	0	0	251.346	1	1	47.5395	29.7667
DATA	370	5	30	0	0	A_64_P098774	ENSRNOT00000002068	7476.61	219.056	2.765129e+001	4.080439e+000	89	32	7.300000e+000	0	0	0	0	0	0	27.0475	1	1	48.2044	32.96
DATA	371	5	31	0	0	A_64_P163184	NM_001107855	7501.72	218.97	7.567439e+002	7.573398e+001	785	31	7.069018e+000	0	0	0	0	0	0	739.45	1	1	45.835	30.1667
DATA	372	5	32	0	0	A_42_P549675	NM_080577	7526.85	219	5.340210e+003	5.340295e+002	5037	29.5	6.295742e+000	0	0	0	0	0	0	5211.82	1	1	46.8651	29.7273
DATA	373	5	33	0	0	A_64_P287740	NM_001127601	7552.15	219.069	6.427189e+001	7.097835e+000	124	27.5	8.376661e+000	0	0	0	0	0	0	62.6377	1	1	46.8651	29.7941
DATA	374	5	34	0	0	A_64_P059545	NM_053477	7577.92	219.139	7.373899e+003	7.373960e+002	7034.5	33	9.146402e+000	0	0	0	0	0	0	7174.58	1	1	48.8603	34.36
DATA	375	5	35	0	0	A_44_P465856	NM_199398	7603.5	219	9.687275e+000	3.173829e+000	70	33	8.541486e+000	0	0	0	0	0	0	9.40771	1	0	54.1152	32.9032
DATA	376	5	36	0	0	A_42_P714075	NM_031723	7628.23	219.116	1.039935e+003	1.040376e+002	1070	31	1.124216e+001	0	0	0	0	0	0	1007.96	1	1	46.5243	33.6429
DATA	377	5	37	0	0	A_42_P605265	NM_053677	7654.09	219.065	4.097410e+001	5.099074e+000	101	31.5	6.707903e+000	0	0	0	0	0	0	39.6249	1	1	54.4085	30.8125
DATA	378	5	38	0	0	A_64_P047401	NM_001009369	7679.38	219	4.140009e+003	4.140121e+002	3994	32	7.345589e+000	0	0	0	0	0	0	3994.14	1	1	48.5334	31.4286
DATA	379	5	39	0	0	A_64_P018891	A_64_P018891	7704.61	219.069	1.139277e+002	1.179397e+001	170	35.5	7.887685e+000	0	0	0	0	0	0	109.637	1	1	53.8203	33.7083
DATA	380	5	40	0	0	A_64_P026297	NM_022583	7730.42	219.427	5.321803e+001	6.137937e+000	114	35	5.970897e+000	0	0	0	0	0	0	51.0765	1	1	57.5363	34.4194
DATA	381	5	41	0	0	A_43_P13508	NM_001015031	7755.32	219.148	4.223976e+001	5.220050e+000	104	34	1.038223e+001	0	0	0	0	0	0	40.4229	1	1	50.4627	36.1724
DATA	382	5	42	0	0	A_64_P077426	XM_001080794	7780.93	219.356	1.746060e+004	1.746063e+003	16499	33	8.237993e+000	0	0	0	0	0	0	16659.3	1	1	53.5237	33.8824
DATA	383	5	43	0	0	A_44_P370175	NM_031773	7806.5	219.352	8.061355e+001	8.631932e+000	139	33	7.732714e+000	0	0	0	0	0	0	76.6673	1	1	57.5363	32.4444
DATA	384	5	44	0	0	A_64_P084288	NM_001000496	7831.58	219.427	9.180091e+000	3.229573e+000	69	35.5	9.344554e+000	0	0	0	0	0	0	8.70216	1	0	65	35.3
DATA	385	5	45	0	0	A_44_P400936	A_44_P400936	7857.42	219.427	3.277396e+002	3.292093e+001	368	32.5	1.031950e+001	0	0	0	0	0	0	309.581	1	1	57.5363	31.6842
DATA	386	5	46	0	0	A_64_P019599	NM_012713	7882.53	219.2	2.037630e+002	2.061357e+001	254	35.5	1.077253e+001	0	0	0	0	0	0	191.777	1	1	47.2035	36.7813
DATA	387	5	47	0	0	A_44_P644356	AI556299	7907.85	218.985	2.517791e+001	4.017294e+000	84	33	9.161866e+000	0	0	0	0	0	0	23.6075	1	1	46.1809	34.1613
DATA	388	5	48	0	0	A_64_P057076	A_64_P057076	7933.32	219.042	1.373373e+002	1.408867e+001	192	33	9.332715e+000	0	0	0	0	0	0	128.276	1	1	48.5334	33.6364
DATA	389	5	49	0	0	A_64_P087392	NM_001108764	7958.58	219.427	1.897087e+002	1.923137e+001	236	32.5	1.015456e+001	0	0	0	0	0	0	176.508	1	1	57.5363	34.1786
DATA	390	5	50	0	0	A_44_P436604	NM_001025627	7984.42	219.427	2.455637e+001	4.008143e+000	88	33	8.997309e+000	0	0	0	0	0	0	22.7528	1	1	57.5363	32.5185
DATA	391	5	51	0	0	A_43_P23200	NM_001107832	8009.58	219.427	4.434862e+002	4.446256e+001	467.5	35	1.625737e+001	0	0	0	0	0	0	409.208	1	1	57.5363	37.0741
DATA	392	5	52	0	0	A_42_P515876	NM_031097	8035	219.455	7.587422e+002	7.594145e+001	737.5	32	7.216416e+000	0	0	0	1	0	0	697.096	1	1	55.8519	32.92
DATA	393	5	53	0	0	A_44_P1047924	NM_053523	8060.12	219.459	4.126437e+003	4.126562e+002	3789.5	33.5	8.175651e+000	0	0	0	0	0	0	3774.73	1	1	48.8603	31.7857
DATA	394	5	54	0	0	A_44_P682668	NM_001014228	8085.46	219.5	1.431809e+002	1.467635e+001	190.5	31	8.902086e+000	0	0	0	0	0	0	130.394	1	1	49.1849	31.8333
DATA	395	5	55	0	0	A_64_P061489	NM_001108746	8111.33	219.5	1.860483e+001	3.734467e+000	81.5	38	1.296375e+001	0	0	0	0	0	0	16.8646	1	1	65	38.3939
DATA	396	5	56	0	0	A_64_P047747	NM_182474	8136.67	219.329	2.319092e+003	2.319320e+002	2134.5	31	9.093250e+000	0	0	0	0	0	0	2092.35	1	1	48.2044	32.4828
DATA	397	5	57	0	0	A_64_P091163	NM_001107083	8161.89	219.5	4.851065e+001	5.849375e+000	106	32.5	8.331828e+000	0	0	0	0	0	0	43.5646	1	1	56.9804	32.5
DATA	398	5	58	0	0	A_64_P133992	NM_001008825	8187.38	219.636	1.421433e+002	1.458876e+001	189	32.5	8.597046e+000	0	0	0	0	0	0	127.043	1	1	49.8279	32.4333
DATA	399	5	59	0	0	A_42_P503768	NM_001009466	8212.6	219.823	4.159035e+002	4.172105e+001	430.5	32.5	1.050185e+001	0	0	0	0	0	0	369.951	1	1	50.1463	34.1176
DATA	400	5	60	0	0	A_44_P400346	ENSRNOT00000059540	8238.33	219.5	7.113233e+001	7.848384e+000	128.5	29	6.463795e+000	0	0	0	0	0	0	62.9536	1	1	65	30.7742
DATA	401	5	61	0	0	A_64_P128438	NM_012591	8263.44	219.521	3.410106e+003	3.410269e+002	2968	34	7.297390e+000	0	0	0	0	0	0	3003.26	1	1	48.2044	32.2424
DATA	402	5	62	0	0	A_44_P531758	NM_012935	8289.05	219.473	2.959481e+004	2.959483e+003	25319	32	8.535190e+000	0	0	0	0	0	0	25932.3	1	1	53.8203	30.129
DATA	403	5	63	0	0	A_43_P10257	NM_203335	8314.12	219.603	8.850579e+003	8.850643e+002	7372	37	9.584724e+000	0	0	0	0	0	0	7716.97	1	1	48.5334	36.4375
DATA	404	5	64	0	0	A_64_P011744	NM_001108789	8339.37	219.662	4.559533e+002	4.572068e+001	456	28.5	8.703349e+000	0	0	0	0	0	0	395.556	1	1	48.2044	29.9
DATA	405	5	65	0	0	A_44_P282794	NM_001107523	8365.11	219.5	2.773384e+001	4.388483e+000	88	29	7.140062e+000	0	0	0	0	0	0	23.9347	1	1	56.9804	30.6585
DATA	406	5	66	0	0	A_42_P463784	NM_001008526	8390.88	219.733	1.656994e+003	1.657347e+002	1469.5	34	9.589247e+000	0	0	0	1	0	0	1422.67	1	1	52.3208	33.5294
DATA	407	5	67	0	0	A_42_P630463	NM_022238	8415.63	219.653	4.384041e+002	4.397484e+001	437	33	8.436962e+000	0	0	0	0	0	0	374.512	1	1	48.2044	33.4815
DATA	408	5	68	0	0	A_64_P006728	NM_001108905	8441.14	219.722	3.934636e+003	3.934788e+002	3347	34	9.733422e+000	0	0	0	0	0	0	3343.88	1	1	47.8731	33.2857
DATA	409	5	69	0	0	A_44_P360629	NM_001000030	8466.75	219.575	1.016981e+002	1.074613e+001	144	32.5	9.177483e+000	0	0	0	0	0	0	85.9756	1	1	48.5334	33.6786
DATA	410	5	70	0	0	A_64_P024620	NM_001006995	8491.81	219.588	2.590679e+004	2.590682e+003	21637	31.5	8.335699e+000	0	0	0	0	0	0	21790.2	1	1	46.5243	33.25
DATA	411	5	71	0	0	A_64_P091194	ENSRNOT00000049254	8517.5	219.742	2.167780e+004	2.167783e+003	18030.5	30	1.016494e+001	0	0	0	0	0	0	18138.9	1	1	46.5243	32.25
DATA	412	5	72	0	0	A_44_P334922	NM_022379	8542.67	219.5	7.781178e+000	3.610855e+000	69	32.5	7.443728e+000	0	0	0	0	0	0	6.47726	1	0	57.5363	32.5
DATA	413	5	73	0	0	A_42_P482051	XM_001059157	8568.44	219.933	1.593077e+003	1.593471e+002	1324	34	7.000528e+000	0	0	0	1	0	0	1319.39	1	1	48.8603	34.6897
DATA	414	5	74	0	0	A_42_P674742	XM_002726367	8593.67	219.753	1.034947e+004	1.034953e+003	8425.5	32	7.175886e+000	0	0	0	0	0	0	8527.53	1	1	48.2044	34.08
DATA	415	5	75	0	0	A_64_P105211	XM_233310	8619	219.545	3.315941e+001	4.880194e+000	88.5	28	6.489666e+000	0	0	0	0	0	0	27.1819	1	1	55.8519	29.4828
DATA	416	5	76	0	0	A_64_P058523	NM_134385	8644.42	219.573	8.805805e+000	3.704925e+000	69	27.5	6.855655e+000	0	0	0	0	0	0	7.18203	1	0	57.5363	28.5
DATA	417	5	77	0	0	A_44_P586876	NM_001100805	8669.8	219.818	1.987346e+003	1.987675e+002	1660	27	9.909563e+000	0	0	0	0	0	0	1612.9	1	1	52.9257	29.7407
DATA	418	5	78	66	1	DarkCorner	DarkCorner	8695.53	220	3.647825e+000	3.634623e+000	55	28	6.657900e+000	0	0	0	0	0	0	-5.53515	0	0	49.8279	27.5926
DATA	419	5	79	66	1	DarkCorner	DarkCorner	8720.66	219.662	3.666018e+000	3.652751e+000	57.5	30	9.185934e+000	0	0	0	0	0	0	-3.73423	0	0	48.2044	31.2973
DATA	420	5	80	66	1	DarkCorner	DarkCorner	8746.53	219.706	3.684170e+000	3.670837e+000	57.5	29	6.577016e+000	0	0	0	0	0	0	-3.45276	0	0	46.5243	29.4286
DATA	421	5	81	66	1	DarkCorner	DarkCorner	8771.42	219.573	3.701701e+000	3.688304e+000	61	31	7.732615e+000	0	0	0	0	0	0	-1.75801	0	0	57.5363	30.72
DATA	422	5	82	66	1	DarkCorner	DarkCorner	8796.79	220.024	3.718691e+000	3.705233e+000	56.5	32.5	9.426137e+000	0	0	0	0	0	0	-4.42892	0	0	36.1258	32.2353
DATA	423	5	83	66	1	DarkCorner	DarkCorner	8822.73	220.058	3.736375e+000	3.722853e+000	59	29	7.517654e+000	0	0	0	0	0	0	-2.55852	0	0	46.1809	29.4688
DATA	424	5	84	66	1	DarkCorner	DarkCorner	8848.22	220.208	3.753385e+000	3.739801e+000	59	29	8.009508e+000	0	0	0	0	0	0	-1.25571	0	0	48.5334	30.9063
DATA	425	5	85	66	1	DarkCorner	DarkCorner	8872.91	219.614	3.802026e+000	3.776099e+000	66	27	7.307063e+000	0	0	0	0	0	0	2.9704	1	0	57.259	28.3958
DATA	426	6	1	66	1	DarkCorner	DarkCorner	6752.5	226	3.257930e+000	3.246139e+000	63	27	8.181925e+000	0	0	0	0	0	0	-0.321331	0	0	54.1152	29.3902
DATA	427	6	2	66	1	DarkCorner	DarkCorner	6777.74	225.987	3.235124e+000	3.226021e+000	63	29	7.035624e+000	0	0	0	0	0	0	1.1803	0	0	49.1849	29.8
DATA	428	6	3	66	1	DarkCorner	DarkCorner	6803.35	226.287	3.212990e+000	3.201362e+000	61	31	8.417155e+000	0	0	0	0	0	0	-1.45728	0	0	49.8279	31.5526
DATA	429	6	4	66	1	DarkCorner	DarkCorner	6828.81	226.141	3.192688e+000	3.181133e+000	61	33	8.294974e+000	0	0	0	0	0	0	-1.70658	0	0	50.4627	32.7353
DATA	430	6	5	66	1	DarkCorner	DarkCorner	6854.69	226.169	3.173140e+000	3.161656e+000	59	27	7.654628e+000	0	0	0	0	0	0	-3.7761	0	0	47.2035	28.52
DATA	431	6	6	66	1	DarkCorner	DarkCorner	6879.76	225.961	3.155588e+000	3.144168e+000	60.5	31	5.986438e+000	0	0	0	0	0	0	-2.03557	0	0	49.1849	30.1379
DATA	432	6	7	66	1	DarkCorner	DarkCorner	6904.6	226.11	3.138979e+000	3.127619e+000	57	28	9.363404e+000	0	0	0	0	0	0	-4.7739	0	0	48.5334	31.44
DATA	433	6	8	66	1	DarkCorner	DarkCorner	6930.42	226.427	3.122713e+000	3.111412e+000	60	27	7.466253e+000	0	0	0	0	0	0	-3.84876	0	0	57.5363	28.3077
DATA	434	6	9	0	0	A_64_P034324	NM_001108282	6955.58	226.427	6.466909e+001	7.170223e+000	126.5	34	8.313434e+000	0	0	0	0	0	0	61.2902	1	1	57.5363	34.9118
DATA	435	6	10	0	0	A_64_P071506	ENSRNOT00000025007	6981.42	226.427	2.724426e+001	4.114444e+000	87	34	9.852870e+000	0	0	0	0	0	0	25.936	1	1	65	34.4783
DATA	436	6	11	0	0	A_64_P050705	NM_001106061	7006.5	226.352	1.484495e+002	1.515926e+001	207	34.5	8.944358e+000	0	0	0	0	0	0	141.886	1	1	57.5363	35.8077
DATA	437	6	12	0	0	A_64_P032242	NM_001008898	7031.91	226.386	1.594220e+001	3.449826e+000	76	36	1.020431e+001	0	0	0	0	0	0	15.2949	1	1	57.259	36.4688
DATA	438	6	13	0	0	A_42_P730320	NM_001013877	7057.42	226.427	6.795528e+001	7.448093e+000	127	36	1.189734e+001	0	0	0	0	0	0	65.4231	1	1	57.5363	38.7586
DATA	439	6	14	0	0	A_64_P123073	A_64_P123073	7082.51	225.973	3.933452e+002	3.945179e+001	449	42	1.229153e+001	0	0	0	0	0	0	379.826	1	1	48.5334	42.7667
DATA	440	6	15	0	0	A_64_P064709	NM_001166303	7108.19	226.43	1.181221e+002	1.219476e+001	179	33	6.494899e+000	0	0	0	0	0	0	114.406	1	1	58.0869	32.6061
DATA	441	6	16	0	0	A_44_P123381	NM_013012	7133.5	226.352	1.539615e+001	3.392301e+000	77	29	7.228940e+000	0	0	0	0	0	0	14.9498	1	1	57.5363	29.1515
DATA	442	6	17	0	0	A_44_P557487	NM_053617	7158.89	226.5	2.430265e+001	3.873123e+000	85	29.5	7.946834e+000	0	0	0	0	0	0	23.6529	1	1	56.9804	29.25
DATA	443	6	18	0	0	A_64_P084971	NM_017007	7184.42	226.427	5.672151e+004	5.672152e+003	54718	31	7.928867e+000	0	0	0	0	0	0	55315.7	1	1	57.5363	30.1875
DATA	444	6	19	0	0	A_42_P770556	NM_033096	7209.44	226.26	8.175127e+003	8.175182e+002	7861.5	33	7.083748e+000	0	0	0	0	0	0	7985.83	1	1	49.5074	32.1111
DATA	445	6	20	0	0	A_64_P023381	XM_001073278	7235.11	226.5	7.479678e+001	8.058915e+000	134	30	7.785734e+000	0	0	0	0	0	0	73.1778	1	1	56.9804	31.4412
DATA	446	6	21	0	0	A_64_P059217	NM_053667	7260.5	226.5	2.644893e+002	2.661813e+001	322	30	5.826437e+000	0	0	0	0	0	0	259.076	1	1	57.5363	31
DATA	447	6	22	0	0	A_44_P286215	NM_001008885	7285.93	226.237	1.583041e+002	1.611102e+001	218	30	7.060796e+000	0	0	0	0	0	0	155.202	1	1	49.1849	30.625
DATA	448	6	23	0	0	A_64_P138056	A_64_P138056	7311	225.774	5.278625e+002	5.287099e+001	575	30	8.472810e+000	0	0	0	0	0	0	517.815	1	1	45.4864	31.0667
DATA	449	6	24	0	0	A_44_P280799	NM_001000654	7336.32	225.76	1.819695e+001	3.500853e+000	83	29.5	7.183742e+000	0	0	0	0	0	0	17.8586	1	1	48.5334	28.3846
DATA	450	6	25	0	0	A_64_P111599	NM_001191586	7361.57	226.257	6.236276e+002	6.243439e+001	660.5	31	7.699134e+000	0	0	0	0	0	0	612.231	1	1	48.8603	30.88
DATA	451	6	26	0	0	A_64_P088635	ENSRNOT00000059643	7387.5	226.5	2.536335e+001	3.920629e+000	87	33	7.745967e+000	0	0	0	0	0	0	24.9005	1	1	57.5363	31.3333
DATA	452	6	27	0	0	A_64_P042332	NM_021860	7412.67	226.5	6.816329e+000	3.067185e+000	69	35	9.421728e+000	0	0	0	0	0	0	6.69021	1	0	57.5363	35.7
DATA	453	6	28	0	0	A_42_P599080	NM_053753	7437.97	226.222	1.074802e+002	1.115674e+001	169	28	7.848473e+000	0	0	0	0	0	0	105.433	1	1	47.2035	31.2069
DATA	454	6	29	0	0	A_44_P576954	NM_001106645	7463.48	226.147	1.141517e+003	1.141910e+002	1162.5	31	6.998095e+000	0	0	0	0	0	0	1118.96	1	1	49.8279	31.16
DATA	455	6	30	0	0	A_64_P046687	A_64_P046687	7488.67	226.167	7.679004e+003	7.679062e+002	7428	33	6.964705e+000	0	0	0	0	0	0	7520.39	1	1	47.8731	31.2593
DATA	456	6	31	0	0	A_42_P694928	NM_001109046	7514.39	226.203	4.072507e+002	4.083545e+001	443.5	32	8.190663e+000	0	0	0	0	0	0	398.383	1	1	49.1849	31.7826
DATA	457	6	32	0	0	A_64_P032811	NM_001134575	7539.15	226.16	5.060610e+001	5.885274e+000	109.5	26	7.152988e+000	0	0	0	0	0	0	49.439	1	1	50.7771	28.3704
DATA	458	6	33	0	0	A_64_P141070	ENSRNOT00000058701	7565.33	226.5	1.027299e+002	1.070459e+001	165.5	33	8.541738e+000	0	0	0	0	0	0	100.209	1	1	57.5363	32.1935
DATA	459	6	34	0	0	A_64_P093462	NM_001108129	7590.32	226.6	2.263132e+004	2.263134e+003	21567	33	9.597914e+000	0	0	0	0	0	0	22038.7	1	1	50.7771	34.5938
DATA	460	6	35	0	0	A_42_P799306	ENSRNOT00000015782	7615.89	226.5	6.401394e+001	7.078012e+000	121.5	30	8.304002e+000	0	0	0	0	0	0	62.2154	1	1	56.9804	30.6486
DATA	461	6	36	0	0	A_42_P726743	NM_001108985	7640.87	226.757	1.368033e+003	1.368367e+002	1400.5	31.5	9.539018e+000	0	0	0	0	0	0	1326.92	1	1	46.5243	31.25
DATA	462	6	37	0	0	A_44_P228341	NM_001025701	7666.5	226.5	2.795048e+003	2.795213e+002	2713.5	31	6.815852e+000	0	0	0	0	0	0	2704.62	1	1	49.1849	29.0741
DATA	463	6	38	0	0	A_42_P571433	NM_031059	7692.29	226.453	2.114912e+003	2.115131e+002	2020	32	6.997638e+000	0	0	0	0	0	0	2041.35	1	1	49.1849	30.6786
DATA	464	6	39	0	0	A_44_P132783	NM_214833	7717.5	226.5	1.454595e+002	1.486204e+001	198.5	33	6.257318e+000	0	0	0	0	0	0	140.035	1	1	57.5363	32.8667
DATA	465	6	40	0	0	A_44_P119215	NM_001108941	7742.89	226.5	4.029963e+001	5.058489e+000	99	35.5	8.423638e+000	0	0	0	0	0	0	38.6882	1	1	65	37.9286
DATA	466	6	41	0	0	A_44_P124259	XM_345871	7768.42	226.573	2.960076e+001	4.262062e+000	89	33	9.787226e+000	0	0	0	0	0	0	28.3333	1	1	57.5363	34.6486
DATA	467	6	42	0	0	A_44_P422063	NM_001107631	7793.58	226.573	1.278279e+002	1.314766e+001	182.5	31	6.402343e+000	0	0	0	0	0	0	121.978	1	1	57.5363	31.36
DATA	468	6	43	0	0	A_44_P1033023	NM_013063	7818.69	226.662	9.019185e+003	9.019238e+002	8273	32.5	9.036643e+000	0	0	0	0	0	0	8578.98	1	1	48.5334	33.8333
DATA	469	6	44	0	0	A_64_P121618	NM_001134542	7844.12	226.662	2.113674e+002	2.136232e+001	257.5	34	8.634034e+000	0	0	0	0	0	0	200.369	1	1	45.4864	33.8108
DATA	470	6	45	0	0	A_64_P042188	ENSRNOT00000034890	7869.88	226.615	1.112876e+004	1.112881e+003	10456	31	8.478248e+000	0	0	0	0	0	0	10511.8	1	1	53.8203	30.5455
DATA	471	6	46	0	0	A_42_P561616	AI234869	7895.44	226.466	1.043594e+003	1.044060e+002	1006	33	9.472816e+000	0	0	0	0	0	0	982.074	1	1	49.1849	34.6486
DATA	472	6	47	0	0	A_42_P588606	NM_001134544	7920.59	226.671	2.805830e+002	2.823240e+001	323	32	1.152948e+001	0	0	0	0	0	0	263.066	1	1	48.5334	34.7391
DATA	473	6	48	0	0	A_42_P568897	NM_001005563	7946.12	226.58	8.120046e+002	8.126126e+001	822.5	36.5	1.095807e+001	0	0	0	0	0	0	758.309	1	1	47.2035	35.3
DATA	474	6	49	0	0	A_64_P096356	NM_012640	7971.5	226.648	3.418529e+004	3.418531e+003	31873	35	1.166153e+001	0	0	0	0	0	0	31797	1	1	57.5363	35.5161
DATA	475	6	50	0	0	A_64_P006418	A_64_P006418	7996.81	226.781	6.529556e+003	6.529632e+002	6121	35	1.470294e+001	0	0	0	0	0	0	6048.62	1	1	48.2044	38.7813
DATA	476	6	51	0	0	A_64_P156389	A_64_P156389	8022.45	226.88	7.919434e+001	8.534800e+000	133.5	32	8.907149e+000	0	0	0	0	0	0	73.0498	1	1	48.8603	31.8214
DATA	477	6	52	0	0	A_42_P576446	NM_001107673	8047.28	226.763	1.008078e+004	1.008083e+003	8922.5	34	5.737886e+000	0	0	0	0	0	0	9259.04	1	1	49.1849	34.56
DATA	478	6	53	0	0	A_64_P022804	A_64_P022804	8072.88	226.5	1.600571e+003	1.600893e+002	1513	34	6.588847e+000	0	0	0	0	0	0	1463.46	1	1	47.8731	33.7097
DATA	479	6	54	0	0	A_64_P162356	A_64_P162356	8098.29	226.754	1.497993e+004	1.497996e+003	13474.5	34	1.194002e+001	0	0	0	0	0	0	13635.8	1	1	45.1352	37.4444
DATA	480	6	55	0	0	A_44_P266776	NM_199388	8123.73	226.781	8.357603e+002	8.363878e+001	818	33	9.254742e+000	0	0	0	0	0	0	757.279	1	1	48.2044	32.6897
DATA	481	6	56	0	0	A_64_P035066	NM_001008960	8149.32	226.985	1.246220e+001	3.484905e+000	72.5	31	7.996972e+000	0	0	0	0	0	0	11.2395	1	0	46.5243	30.4815
DATA	482	6	57	0	0	A_64_P072728	NM_001100667	8174.5	227	9.215629e+003	9.215687e+002	8037.5	33	8.257087e+000	0	0	0	0	0	0	8272.49	1	1	48.5334	34.1111
DATA	483	6	58	0	0	A_64_P028446	NM_001106007	8199.88	226.905	3.862761e+003	3.862900e+002	3400	33	1.259731e+001	0	0	0	0	0	0	3450.74	1	1	47.5395	35.6667
DATA	484	6	59	0	0	A_44_P251212	NM_031715	8225.5	227	5.089468e+004	5.089469e+003	44627	31	9.886924e+000	0	0	0	0	0	0	45244.4	1	1	54.1152	33.3143
DATA	485	6	60	0	0	A_42_P818240	NM_001108334	8250.95	226.907	1.471695e+004	1.471699e+003	12843	28.5	8.193704e+000	0	0	0	0	0	0	13018.4	1	1	46.8651	31.0333
DATA	486	6	61	0	0	A_64_P023122	NM_001080208	8276.07	226.831	1.504681e+001	3.658300e+000	74.5	30.5	7.045861e+000	0	0	0	0	0	0	13.2446	1	0	46.8651	29.9688
DATA	487	6	62	0	0	A_44_P217821	NM_001107292	8301.59	226.845	2.676929e+002	2.697826e+001	292	33	1.098028e+001	0	0	0	0	0	0	234.448	1	1	47.5395	34.069
DATA	488	6	63	0	0	A_64_P007372	NM_001105895	8327	227	1.333968e+001	3.622728e+000	72	31	8.158247e+000	0	0	0	0	0	0	11.6246	1	0	54.9904	31.0968
DATA	489	6	64	0	0	A_42_P792382	NM_017257	8352.23	226.788	9.466633e+003	9.466693e+002	8082.5	30	9.108508e+000	0	0	0	0	0	0	8207.54	1	1	45.835	31.6667
DATA	490	6	65	0	0	A_43_P12232	NM_022512	8377.8	226.784	2.404592e+003	2.404833e+002	2123	31.5	7.931069e+000	0	0	0	0	0	0	2074.08	1	1	47.8731	31.2632
DATA	491	6	66	0	0	A_64_P158475	A_64_P158475	8403.16	226.897	8.552106e+003	8.552175e+002	7420.5	34	8.579647e+000	0	0	0	0	0	0	7339.17	1	1	46.5243	33.9
DATA	492	6	67	0	0	A_64_P043361	NM_001197023	8428.56	226.973	1.160977e+002	1.210806e+001	162	33	7.173877e+000	0	0	0	0	0	0	99.1227	1	1	48.5334	32.2581
DATA	493	6	68	0	0	A_64_P080851	NM_001105753	8454.18	227.027	3.131302e+001	4.663323e+000	90.5	34	1.004309e+001	0	0	0	0	0	0	26.5966	1	1	46.8651	34.3636
DATA	494	6	69	0	0	A_44_P129330	NM_001107505	8479.51	226.873	1.305643e+003	1.306105e+002	1154	30	4.358245e+000	0	0	0	0	0	0	1103.25	1	1	47.8731	29.9259
DATA	495	6	70	0	0	A_64_P008827	NM_001014012	8504.87	227	2.905734e+003	2.905944e+002	2449	31	7.580527e+000	0	0	0	0	0	0	2442.8	1	1	48.5334	31.8148
DATA	496	6	71	0	0	A_64_P026222	NM_001101019	8530.39	227.069	6.271707e+001	7.186814e+000	114.5	32	1.002009e+001	0	0	0	0	0	0	52.4544	1	1	53.8203	32.4286
DATA	497	6	72	0	0	A_64_P067749	NM_012659	8555.5	227	5.639980e+004	5.639982e+003	47051.5	33	7.158236e+000	0	0	0	0	0	0	46931.3	1	1	54.1152	32.6286
DATA	498	6	73	0	0	A_44_P362981	NM_145878	8580.91	227.065	5.786278e+004	5.786279e+003	46762	35	7.032890e+000	0	0	0	0	0	0	47904.2	1	1	54.4085	34.3333
DATA	499	6	74	0	0	A_64_P146654	NM_031698	8606.59	227.092	3.371894e+003	3.372082e+002	2827.5	29.5	8.512668e+000	0	0	0	0	0	0	2777.28	1	1	49.1849	31.5
DATA	500	6	75	0	0	A_42_P548800	NM_001007696	8631.79	227	8.190008e+003	8.190087e+002	6656	30	7.874128e+000	0	0	0	0	0	0	6711.82	1	1	46.8651	30.5758
DATA	501	6	76	0	0	A_44_P310581	BG673348	8657.31	227.023	5.193280e+003	5.193405e+002	4227	30.5	8.139898e+000	0	0	0	0	0	0	4234.6	1	1	50.7771	30.5357
DATA	502	6	77	0	0	A_64_P062269	XM_001067531	8682.5	227	2.091796e+002	2.122845e+001	231.5	30	8.292230e+000	0	0	0	0	0	0	169.725	1	1	54.1152	31.2414
DATA	503	6	78	66	1	DarkCorner	DarkCorner	8707.91	227.386	3.648098e+000	3.634895e+000	57	31	8.914378e+000	0	0	0	0	0	0	-4.49838	0	0	57.259	30.4412
DATA	504	6	79	66	1	DarkCorner	DarkCorner	8734.37	227.387	3.666645e+000	3.653375e+000	57	31	7.092463e+000	0	0	0	0	0	0	-3.93855	0	0	48.8603	32
DATA	505	6	80	66	1	DarkCorner	DarkCorner	8758.54	227.2	3.683680e+000	3.670348e+000	61	29	6.865836e+000	0	0	0	0	0	0	-2.31043	0	0	47.5395	29.4706
DATA	506	6	81	66	1	DarkCorner	DarkCorner	8784.09	227.386	3.701075e+000	3.687680e+000	59	29.5	1.089634e+001	0	0	0	0	0	0	-0.141809	0	0	57.259	31.7143
DATA	507	6	82	66	1	DarkCorner	DarkCorner	8809.24	227.359	3.718273e+000	3.704817e+000	54	29.5	5.861902e+000	0	0	0	0	0	0	-6.45351	0	0	50.1463	29.6563
DATA	508	6	83	66	1	DarkCorner	DarkCorner	8834.76	227.532	3.735263e+000	3.721745e+000	60	29.5	8.447849e+000	0	0	0	0	0	0	-1.20894	0	0	50.7771	31.3846
DATA	509	6	84	66	1	DarkCorner	DarkCorner	8860.51	227.171	3.752835e+000	3.740386e+000	59	28	7.362962e+000	0	0	0	0	0	0	0.722493	0	0	47.5395	29.1892
DATA	510	6	85	66	1	DarkCorner	DarkCorner	8887.1	227.341	7.940071e+000	3.839373e+000	65	27	7.524955e+000	0	0	0	0	0	0	6.20421	1	0	36.1258	28.043
DATA	511	7	1	66	1	DarkCorner	DarkCorner	6739.65	232.859	7.604563e+000	3.338971e+000	68	27	6.900636e+000	0	0	0	1	0	0	6.86528	1	0	47.5395	27.3005
DATA	512	7	2	66	1	DarkCorner	DarkCorner	6765.54	233.162	3.519768e+000	3.246239e+000	67	28	9.478409e+000	0	0	0	0	0	0	3.20134	1	0	50.4627	30.5667
DATA	513	7	3	66	1	DarkCorner	DarkCorner	6790.3	233.303	3.217100e+000	3.207466e+000	61	30	8.702952e+000	0	0	0	0	0	0	1.03938	0	0	49.5074	31.2069
DATA	514	7	4	66	1	DarkCorner	DarkCorner	6816.05	233.185	3.196053e+000	3.184486e+000	59	33	7.531813e+000	0	0	0	0	0	0	-2.21022	0	0	50.4627	32.7
DATA	515	7	5	66	1	DarkCorner	DarkCorner	6841.59	233.421	3.176090e+000	3.164595e+000	60	31	7.231693e+000	0	0	0	0	0	0	-2.69076	0	0	49.5074	30.3438
DATA	516	7	6	66	1	DarkCorner	DarkCorner	6866.34	233.042	3.158463e+000	3.147033e+000	60	28	5.867402e+000	0	0	0	0	0	0	-1.91703	0	0	46.8651	27.9545
DATA	517	7	7	66	1	DarkCorner	DarkCorner	6892.42	233.427	3.140364e+000	3.128999e+000	62	31	1.176398e+001	0	0	0	0	0	0	-2.32243	0	0	65	33.1304
DATA	518	7	8	66	1	DarkCorner	DarkCorner	6917.58	233.427	3.124364e+000	3.113057e+000	59	27	7.410400e+000	0	0	0	0	0	0	-3.47946	0	0	57.5363	28.3929
DATA	519	7	9	0	0	A_64_P051297	NM_001107416	6942.87	233.624	5.331691e+003	5.331781e+002	5203	31	7.755943e+000	0	0	0	0	0	0	5051.51	1	1	52.0157	31.8919
DATA	520	7	10	0	0	A_64_P162378	A_64_P162378	6968.5	233.5	7.786756e+004	7.786757e+003	74023	32.5	1.201381e+001	0	0	0	0	0	0	74109.8	1	1	57.5363	36.375
DATA	521	7	11	0	0	A_64_P030634	ENSRNOT00000042606	6993.59	233.557	1.431472e+002	1.464047e+001	201	34	1.002163e+001	0	0	0	0	0	0	136.807	1	1	47.8731	34.2083
DATA	522	7	12	0	0	A_64_P110009	NM_024392	7019.06	233.519	1.254497e+004	1.254501e+003	11800	36	1.071346e+001	0	0	0	0	0	0	12036.1	1	1	50.4627	36.2759
DATA	523	7	13	0	0	A_42_P618145	NM_001080783	7044.54	233.386	4.387479e+003	4.387585e+002	4208	34	1.090774e+001	0	0	0	0	0	0	4224.51	1	1	47.5395	35.6429
DATA	525	7	15	0	0	A_64_P101770	NM_001000074	7095.5	233.5	7.104258e+000	3.111384e+000	68.5	34.5	1.069250e+001	0	0	0	0	0	0	6.88371	1	0	57.5363	36.8438
DATA	526	7	16	0	0	A_42_P735934	NM_001105729	7120.68	233.618	5.992493e+003	5.992570e+002	6108	33	9.354884e+000	0	0	0	0	0	0	5822.17	1	1	46.5243	31.9231
DATA	528	7	18	0	0	A_42_P718331	NM_133522	7171.56	233.734	1.602904e+003	1.603186e+002	1590.5	28	7.522189e+000	0	0	0	0	0	0	1564.49	1	1	50.7771	28.8
DATA	529	7	19	0	0	A_64_P118054	NM_001037651	7196.89	233.5	2.989787e+001	4.236716e+000	90	33	7.024340e+000	0	0	0	0	0	0	29.2338	1	1	56.9804	32.8529
DATA	530	7	20	0	0	A_64_P044613	A_64_P044613	7222.5	233.5	8.399018e+004	8.399019e+003	82437	33	6.338080e+000	0	0	0	0	0	0	82256.3	1	1	57.5363	33.0333
DATA	531	7	21	0	0	A_43_P13241	NM_134334	7247.67	233.5	3.313995e+004	3.313996e+003	32032.5	30	7.135144e+000	0	0	0	0	0	0	32498.4	1	1	57.5363	31.1563
DATA	532	7	22	0	0	A_44_P524748	NM_001000712	7273.33	233.5	6.683506e+000	3.063674e+000	71	33.5	4.995865e+000	0	0	0	0	0	0	6.56116	1	0	57.5363	32.5938
DATA	533	7	23	0	0	A_64_P126797	ENSRNOT00000048363	7298.44	233.521	1.194934e+002	1.231714e+001	177	30	1.050100e+001	0	0	0	0	0	0	117.4	1	1	48.2044	33.1765
DATA	535	7	25	0	0	A_42_P730411	NM_001012181	7349.37	233.836	7.503787e+002	7.509720e+001	780	27	6.050839e+000	0	0	0	0	0	0	737.939	1	1	48.5334	27.3913
DATA	536	7	26	0	0	A_64_P049501	NM_001047970	7374.41	233.716	5.800754e+001	6.523487e+000	122	32.5	8.025057e+000	0	0	0	0	0	0	57.0487	1	1	48.5334	32.1923
DATA	537	7	27	0	0	A_42_P623688	NM_031031	7399.67	233.753	8.698526e+003	8.698577e+002	8355	34	9.173210e+000	0	0	0	0	0	0	8553.52	1	1	48.2044	34.1724
DATA	538	7	28	0	0	A_42_P601217	NM_053460	7425.36	233.987	1.527872e+002	1.556775e+001	215	33.5	8.820704e+000	0	0	0	0	0	0	150.19	1	1	49.1849	34.2059
DATA	540	7	30	0	0	A_42_P791872	NM_001135174	7475.99	233.616	1.167261e+004	1.167265e+003	11070	32	7.784663e+000	0	0	0	0	0	0	11456.9	1	1	48.8603	30.6207
DATA	542	7	32	0	0	A_44_P557172	NM_177936	7527.05	233.523	8.732392e+001	9.232481e+000	147	31	5.009843e+000	0	0	0	0	0	0	85.5122	1	1	55.8519	30.7931
DATA	543	7	33	0	0	A_64_P118812	NM_001000512	7552.5	233.648	5.026937e+000	3.043404e+000	66	29	7.236152e+000	0	0	0	0	0	0	4.91565	1	0	57.5363	28.6563
DATA	544	7	34	0	0	A_64_P019425	NM_172035	7577.58	233.573	2.319772e+002	2.339173e+001	283	38.5	1.007932e+001	0	0	0	0	0	0	226.47	1	1	57.5363	39.5
DATA	545	7	35	0	0	A_42_P726743	NM_001108985	7602.71	234.116	1.436272e+003	1.436588e+002	1418	28	8.361933e+000	0	0	0	0	0	0	1399.81	1	1	46.1809	29.5405
DATA	546	7	36	0	0	A_42_P558703	NM_001106810	7628.44	234.29	7.046174e+002	7.052633e+001	738	30	8.425741e+000	0	0	0	0	0	0	685.353	1	1	46.8651	31.2
DATA	547	7	37	0	0	A_42_P619806	TC590118	7654.39	233.833	6.915272e+002	6.921884e+001	732	31	8.787854e+000	0	0	0	0	0	0	671.037	1	1	47.8731	30.5294
DATA	548	7	38	0	0	A_64_P072247	XM_001055615	7679.52	233.585	7.267154e+001	7.874329e+000	134	31	6.589564e+000	0	0	0	0	0	0	70.3484	1	1	45.4864	30.8788
DATA	549	7	39	0	0	A_64_P104164	A_64_P104164	7704.58	233.573	3.847109e+004	3.847110e+003	37558	32	5.235348e+000	0	0	0	0	0	0	37147.6	1	1	57.5363	31.8621
DATA	550	7	40	0	0	A_42_P672103	NM_021770	7730	233.797	2.217791e+004	2.217793e+003	21359	35	7.983100e+000	0	0	0	0	0	0	21358	1	1	46.8651	36.1667
DATA	551	7	41	0	0	A_64_P090942	NM_001000406	7755.19	234.384	1.361900e+001	3.345831e+000	77	33	5.727931e+000	0	0	0	0	0	0	13.08	1	0	46.8651	33.1333
DATA	552	7	42	0	0	A_64_P149491	ENSRNOT00000025458	7780.97	233.973	8.449057e+001	8.988089e+000	143	32	6.039854e+000	0	0	0	0	0	0	80.8898	1	1	46.8651	31.8125
DATA	553	7	43	0	0	A_42_P552441	NR_002704	7806.12	234.095	2.659566e+004	2.659568e+003	25190	31	8.958163e+000	0	0	0	0	0	0	25383	1	1	47.5395	32.7857
DATA	554	7	44	0	0	A_64_P060419	ENSRNOT00000055060	7831.61	233.931	4.346351e+000	3.116218e+000	64	31.5	7.287211e+000	0	0	0	0	0	0	4.13422	1	0	53.8203	33
DATA	555	7	45	0	0	A_44_P161233	NM_019165	7857.09	233.896	9.169266e+002	9.174493e+001	896	33.5	8.774783e+000	0	0	0	0	0	0	869.145	1	1	46.8651	32.5556
DATA	556	7	46	66	-1	(-)3xSLv1	NegativeControl	7881.9	234.19	3.118459e+000	3.107173e+000	55	32.5	8.052283e+000	0	0	0	0	0	0	-6.15861	0	0	43.7019	32.1579
DATA	557	7	47	0	0	A_43_P12519	NM_031114	7907.85	233.893	1.192334e+004	1.192338e+003	10880	36	8.685476e+000	0	0	0	0	0	0	11219.7	1	1	50.1463	36
DATA	558	7	48	0	0	A_44_P317600	NM_012612	7933.5	234	3.798288e+002	3.811173e+001	403.5	30	9.669158e+000	0	0	0	0	0	0	356.04	1	1	54.1152	33.7241
DATA	559	7	49	0	0	A_64_P034166	A_64_P034166	7958.5	234	9.654449e+000	3.288403e+000	71	37	9.130738e+000	0	0	0	0	0	0	9.0146	1	0	54.1152	35.7037
DATA	560	7	50	0	0	A_64_P024585	NM_001109337	7984.5	234	5.533962e+000	3.204752e+000	68.5	33	8.679060e+000	0	0	0	0	0	0	5.14571	1	0	54.1152	32.75
DATA	561	7	51	0	0	A_42_P654682	NM_012724	8009.25	233.643	9.834801e+000	3.318822e+000	71	30.5	7.195678e+000	0	0	0	0	0	0	9.1069	1	0	41.8414	30.7778
DATA	562	7	52	0	0	A_42_P524610	NM_001108992	8034.83	234.04	3.304452e+003	3.304606e+002	2980	31	6.024376e+000	0	0	0	0	0	0	3047.03	1	1	47.8731	29.6897
DATA	563	7	53	0	0	A_64_P046677	NM_020093	8060.35	233.864	1.672384e+001	3.608240e+000	78	35.5	8.837007e+000	0	0	0	0	0	0	15.3528	1	1	45.4864	35.2941
DATA	564	7	54	0	0	A_64_P042742	XM_001061779	8085.78	233.974	6.732064e+002	6.739720e+001	687	32	6.569978e+000	0	0	0	0	0	0	615.279	1	1	49.1849	32.7308
DATA	565	7	55	0	0	A_64_P058430	ENSRNOT00000062073	8111.18	233.918	2.040358e+001	3.817222e+000	81.5	31.5	8.939004e+000	0	0	0	0	0	0	18.5631	1	1	47.2035	31.9167
DATA	566	7	56	0	0	A_42_P479251	NM_001108686	8136.5	234.179	1.006021e+004	1.006026e+003	8806	32	1.081784e+001	0	0	0	0	0	0	9111.27	1	1	49.1849	33.5556
DATA	567	7	57	0	0	A_42_P777329	NM_001106943	8162.01	234.189	5.882557e+002	5.891562e+001	598	32	8.935668e+000	0	0	0	0	0	0	530.263	1	1	47.2035	31.6667
DATA	568	7	58	0	0	A_64_P103414	NM_001106472	8187.5	234	4.853345e+000	3.307713e+000	66.5	32.5	9.099956e+000	0	0	0	0	0	0	4.35381	1	0	54.1152	32.5333
DATA	569	7	59	0	0	A_64_P082164	A_64_P082164	8212.5	234	1.070038e+002	1.119400e+001	158.5	31	9.026416e+000	0	0	0	0	0	0	95.5358	1	1	54.1152	31.0714
DATA	570	7	60	0	0	A_42_P702729	NM_001107557	8238.14	234.096	1.874312e+003	1.874603e+002	1688	28	1.053860e+001	0	0	0	0	0	0	1665.25	1	1	46.8651	31.8
DATA	571	7	61	0	0	A_64_P130922	A_64_P130922	8263.5	234	6.045571e+002	6.054681e+001	594.5	30	6.929625e+000	0	0	0	0	0	0	534.474	1	1	54.1152	30.3448
DATA	572	7	62	0	0	A_42_P509843	NM_001100480	8288.91	234.065	9.201309e+002	9.207356e+001	855.5	32	8.965405e+000	0	0	0	0	0	0	809.441	1	1	54.4085	32.6129
DATA	573	7	63	0	0	A_64_P110759	A_64_P110759	8314.42	234.427	5.752912e+001	6.658750e+000	113	36	1.034439e+001	0	0	0	0	0	0	50.3591	1	1	57.5363	33.8387
DATA	574	7	64	0	0	A_64_P006235	A_64_P006235	8339.74	234.353	8.428030e+002	8.434765e+001	798	27	7.916228e+000	0	0	0	0	0	0	734.044	1	1	51.7088	28.2
DATA	575	7	65	0	0	A_44_P506064	NM_001191778	8365.09	234.386	4.885785e+001	5.945037e+000	105.5	30	8.954003e+000	0	0	0	0	0	0	42.3384	1	1	57.259	32.2162
DATA	576	7	66	0	0	A_64_P075425	A_64_P075425	8390.31	234.338	1.245573e+004	1.245578e+003	10726	29.5	6.803585e+000	0	0	0	0	0	0	10739	1	1	48.5334	30.8824
DATA	577	7	67	0	0	A_42_P544898	NM_001108279	8415.58	234.427	3.852678e+001	5.152743e+000	95	33	8.945705e+000	0	0	0	0	0	0	33.049	1	1	57.5363	32.8889
DATA	578	7	68	0	0	A_44_P837192	ENSRNOT00000038251	8441.42	234.427	2.567276e+001	4.292003e+000	81.5	33.5	7.216281e+000	0	0	0	0	0	0	21.9081	1	1	57.5363	32.8333
DATA	580	7	70	0	0	A_44_P325657	NM_001014007	8492	234.455	1.608707e+002	1.645808e+001	193.5	31	7.570093e+000	0	0	0	0	0	0	135.885	1	1	55.8519	31.8378
DATA	581	7	71	0	0	A_64_P004598	ENSRNOT00000024034	8517.42	234.427	3.466994e+002	3.484543e+001	357	32	9.800917e+000	0	0	0	0	0	0	291.352	1	1	57.5363	33.3333
DATA	582	7	72	0	0	A_42_P607183	XM_001081723	8542.61	234.358	1.762158e+003	1.762508e+002	1512	32	7.906714e+000	0	0	0	1	0	0	1473.32	1	1	45.835	32.5
DATA	584	7	74	0	0	A_42_P589190	NM_023104	8593.4	234.438	1.075916e+003	1.076500e+002	924.5	29	9.713736e+000	0	0	0	0	0	0	890.479	1	1	48.2044	31.76
DATA	585	7	75	0	0	A_42_P757323	TC587630	8618.69	234.468	5.110895e+003	5.111020e+002	4169	29	6.945949e+000	0	0	0	1	0	0	4208.85	1	1	49.8279	30.0606
DATA	586	7	76	0	0	A_42_P688320	NM_001108569	8644.74	234.506	4.551748e+002	4.565825e+001	438.5	31.5	8.118660e+000	0	0	0	0	0	0	372.921	1	1	49.8279	31.5333
DATA	587	7	77	0	0	A_44_P224705	NM_031002	8669.58	234.427	1.199756e+002	1.252606e+001	154	29	7.277362e+000	0	0	0	0	0	0	97.8158	1	1	57.5363	30
DATA	588	7	78	0	0	A_42_P481849	NM_001100563	8695.31	234.338	2.321037e+003	2.321319e+002	1891	30	7.312380e+000	0	0	0	0	0	0	1882.86	1	1	48.5334	29.7143
DATA	589	7	79	66	1	DarkCorner	DarkCorner	8720.5	234.5	3.648767e+000	3.635562e+000	58	31	7.439514e+000	0	0	0	0	0	0	-5.37273	0	0	57.5363	30.7105
DATA	590	7	80	66	1	DarkCorner	DarkCorner	8746.41	234.603	3.666623e+000	3.653353e+000	57	29	8.888093e+000	0	0	0	0	0	0	-3.23176	0	0	50.1463	31.0417
DATA	591	7	81	66	1	DarkCorner	DarkCorner	8771.26	234.221	3.684169e+000	3.670836e+000	54	30	7.395384e+000	0	0	0	0	0	0	-4.63817	0	0	46.1809	29.6522
DATA	592	7	82	66	1	DarkCorner	DarkCorner	8796.67	234.5	3.701144e+000	3.687750e+000	55	30	8.060604e+000	0	0	0	0	0	0	-5.40912	0	0	57.5363	30.84
DATA	593	7	83	66	1	DarkCorner	DarkCorner	8822.33	234.5	3.718430e+000	3.704973e+000	58.5	30	7.149933e+000	0	0	0	0	0	0	-0.0686594	0	0	57.5363	30.8077
DATA	594	7	84	66	1	DarkCorner	DarkCorner	8847.53	235.029	3.734528e+000	3.721013e+000	56	32	8.207301e+000	0	0	0	0	0	0	-2.89875	0	0	47.8731	32.7857
DATA	595	7	85	66	1	DarkCorner	DarkCorner	8873.08	234.368	5.612679e+000	3.780394e+000	65	27	6.722720e+000	0	0	0	0	0	0	4.4066	1	0	49.1849	27.7778
DATA	596	8	1	66	1	DarkCorner	DarkCorner	6752.44	240.738	3.871306e+000	3.254543e+000	68	28	8.752710e+000	0	0	0	0	0	0	3.51635	1	0	50.7771	30.3333
DATA	597	8	2	66	1	DarkCorner	DarkCorner	6778.04	240.927	3.220200e+000	3.208546e+000	64	30	8.107985e+000	0	0	0	0	0	0	-0.167045	0	0	51.7088	30.4643
DATA	598	8	3	66	1	DarkCorner	DarkCorner	6803.24	240.529	3.199413e+000	3.187834e+000	62	32	7.749575e+000	0	0	0	0	0	0	-1.31119	0	0	47.2035	32.4516
DATA	599	8	4	66	1	DarkCorner	DarkCorner	6828.77	241.148	3.178640e+000	3.167136e+000	59	33	9.816167e+000	0	0	0	0	0	0	-3.19195	0	0	52.3208	34
DATA	600	8	5	66	1	DarkCorner	DarkCorner	6854.26	240.436	3.160349e+000	3.148911e+000	63	32	8.311253e+000	0	0	0	0	0	0	-0.510033	0	0	50.4627	31.6667
DATA	601	8	6	66	1	DarkCorner	DarkCorner	6879.54	240.657	3.142515e+000	3.131142e+000	58	31	1.111920e+001	0	0	0	0	0	0	-5.3727	0	0	46.5243	33.3548
DATA	602	8	7	66	1	DarkCorner	DarkCorner	6904.91	240.614	3.125984e+000	3.114671e+000	55	31	9.013878e+000	0	0	0	0	0	0	-5.52653	0	0	57.259	32.8
DATA	603	8	8	0	0	A_44_P487081	NM_001033951	6929.96	240.75	7.546280e+002	7.552642e+001	768	30	7.549584e+000	0	0	0	0	0	0	714.652	1	1	46.1809	31.6061
DATA	604	8	9	0	0	A_64_P054403	NM_001170340	6955.63	240.873	2.827683e+002	2.844458e+001	332	31.5	6.552704e+000	0	0	0	0	0	0	269.059	1	1	47.5395	32.4
DATA	605	8	10	0	0	A_44_P665685	NM_001109325	6980.67	240.974	1.997062e+001	3.663649e+000	80	32.5	1.140175e+001	0	0	0	0	0	0	19.0841	1	1	49.1849	35
DATA	606	8	11	0	0	A_42_P531684	NM_001014215	7006.31	241.014	4.443775e+002	4.454291e+001	468	33	5.889107e+000	0	0	0	0	0	0	426.383	1	1	47.2035	33.05
DATA	607	8	12	0	0	A_42_P722904	ENSRNOT00000006525	7031.68	241	3.417184e+003	3.417320e+002	3333	36	1.213765e+001	0	0	0	1	0	0	3290.97	1	1	49.1849	37.4138
DATA	608	8	13	0	0	A_42_P514057	NM_031839	7057.45	240.507	2.438431e+001	3.895236e+000	88	33	8.010769e+000	0	0	0	0	0	0	23.562	1	1	45.835	33.6207
DATA	609	8	14	0	0	A_64_P087459	A_64_P087459	7082.5	241	1.103423e+005	1.103423e+004	107020	39.5	1.373995e+001	0	0	0	0	0	0	106963	1	1	54.1152	39.8
DATA	610	8	15	0	0	A_42_P581060	NM_001108722	7108	240.839	1.406861e+004	1.406864e+003	13204	34	8.489981e+000	0	0	0	0	0	0	13675.8	1	1	51.4001	33.1852
DATA	611	8	16	0	0	A_42_P658220	NM_001109598	7133.16	240.897	2.983548e+003	2.983700e+002	2898	33	7.263169e+000	0	0	0	0	0	0	2907.59	1	1	46.5243	33.3333
DATA	612	8	17	0	0	A_42_P758454	NM_001108101	7158.65	240.933	2.401454e+002	2.420182e+001	289	30	6.148611e+000	0	0	0	0	0	0	234.564	1	1	49.1849	30.6552
DATA	613	8	18	0	0	A_64_P140956	NM_001013141	7184.01	241.088	3.764388e+002	3.776315e+001	422.5	32	8.304103e+000	0	0	0	0	0	0	368.431	1	1	46.8651	31.6207
DATA	614	8	19	0	0	A_42_P508984	NM_001007729	7209.66	241.091	1.211408e+003	1.211778e+002	1251	33	7.489634e+000	0	0	0	0	0	0	1187.68	1	1	49.1849	33.8065
DATA	615	8	20	0	0	A_42_P619008	NM_001013079	7234.46	240.973	7.068245e+003	7.068308e+002	6756.5	31	7.500000e+000	0	0	0	0	0	0	6939.39	1	1	48.5334	32
DATA	616	8	21	0	0	A_64_P058351	NM_017101	7260.5	241	9.762838e+004	9.762838e+003	95855.5	32	7.357499e+000	0	0	0	0	0	0	95965.3	1	1	54.1152	33.4412
DATA	617	8	22	0	0	A_64_P083800	XM_001058776	7285.7	240.9	8.972313e+001	9.455305e+000	149.5	30	1.124868e+001	0	0	0	0	0	0	88.2735	1	1	47.2035	34.9259
DATA	618	8	23	0	0	A_64_P028088	NM_001106073	7311.38	241	7.009042e+002	7.015379e+001	743	30	9.722670e+000	0	0	0	0	0	0	690.065	1	1	48.5334	31.697
DATA	619	8	24	0	0	A_44_P105441	ENSRNOT00000042202	7336.59	240.912	1.530533e+004	1.530536e+003	15045.5	31	8.669398e+000	0	0	0	0	0	0	15074.7	1	1	49.8279	31.0385
DATA	620	8	25	0	0	A_42_P675802	NM_145777	7361.72	241.095	4.218245e+003	4.218350e+002	4209	31	7.324270e+000	0	0	0	0	0	0	4155.64	1	1	48.8603	30.9167
DATA	621	8	26	0	0	A_64_P018525	ENSRNOT00000027134	7387.44	241.027	3.875036e+002	3.886474e+001	450	34	1.035487e+001	0	0	0	0	0	0	381.728	1	1	48.5334	33.16
DATA	622	8	27	0	0	A_42_P749382	NM_001106731	7412.71	241.131	1.349447e+004	1.349450e+003	12987.5	33	9.387019e+000	0	0	0	0	0	0	13290	1	1	50.1463	32.871
DATA	623	8	28	0	0	A_44_P316364	NM_001077675	7438.62	240.986	1.904314e+001	3.538134e+000	81	31.5	6.009864e+000	0	0	0	0	0	0	18.7443	1	1	47.8731	30.9615
DATA	624	8	29	0	0	A_64_P143596	ENSRNOT00000060139	7463.44	240.973	1.053621e+002	1.095063e+001	164	26	7.271299e+000	0	0	0	0	0	0	103.635	1	1	48.5334	28.4444
DATA	625	8	30	0	0	A_42_P468723	NM_001191689	7488.85	240.985	6.876309e+002	6.882793e+001	746	30	6.423244e+000	0	0	0	0	0	0	675.73	1	1	46.8651	30.5161
DATA	626	8	31	0	0	A_42_P533792	NM_001106575	7514.09	240.672	1.410570e+004	1.410574e+003	13594	32	5.657995e+000	0	0	0	0	0	0	13844.8	1	1	45.1352	31.2903
DATA	627	8	32	0	0	A_43_P16773	XM_217313	7539.43	240.708	4.901048e+002	4.910187e+001	536	30	6.071319e+000	0	0	0	0	0	0	480.399	1	1	45.4864	29.9667
DATA	628	8	33	0	0	A_42_P765830	NM_001106426	7564.71	240.833	2.389860e+004	2.389861e+003	23158	34	8.984317e+000	0	0	0	0	0	0	23390	1	1	45.835	33.7778
DATA	629	8	34	0	0	A_43_P15073	ENSRNOT00000030771	7590.11	241.342	9.354124e+001	9.824598e+000	151	33	9.395153e+000	0	0	0	0	0	0	91.4021	1	1	48.5334	33.2857
DATA	630	8	35	0	0	A_42_P538527	NM_001108885	7616	241.455	1.321195e+003	1.321538e+002	1286.5	28	7.136036e+000	0	0	0	0	0	0	1288.48	1	1	55.8519	28.8611
DATA	631	8	36	0	0	A_64_P037130	A_64_P037130	7641.06	241.156	3.027117e+000	3.025002e+000	64	31	8.813905e+000	0	0	0	0	0	0	2.24891	0	0	48.8603	29.8684
DATA	632	8	37	0	0	A_44_P536115	NM_023957	7666.37	240.735	3.390198e+003	3.390333e+002	3276	28.5	7.114822e+000	0	0	0	0	0	0	3291.32	1	1	46.5243	29
DATA	633	8	38	0	0	A_43_P11800	NM_017059	7692.42	241.427	2.549903e+002	2.567848e+001	306	29	5.358899e+000	0	0	0	0	0	0	246.968	1	1	57.5363	30.0303
DATA	634	8	39	0	0	A_64_P004922	NM_001191924	7717.32	241.32	3.749941e+003	3.750064e+002	3587	33	5.152655e+000	0	0	0	0	0	0	3622.52	1	1	48.8603	31.6296
DATA	635	8	40	0	0	A_64_P145058	NM_001107951	7742.66	241.057	1.335275e+003	1.335623e+002	1349	36	5.571856e+000	0	0	0	0	0	0	1286.24	1	1	46.8651	36.7407
DATA	636	8	41	0	0	A_64_P075372	A_64_P075372	7768.42	241.427	3.779199e+001	4.860135e+000	98	32	5.064640e+000	0	0	0	0	0	0	36.2986	1	1	65	31.0667
DATA	637	8	42	0	0	A_64_P118792	NM_001107034	7793.58	241.427	3.573500e+001	4.708075e+000	97	31	8.331349e+000	0	0	0	0	0	0	34.2177	1	1	65	32.8214
DATA	638	8	43	0	0	A_42_P469685	NM_001100532	7818.93	241.043	4.922561e+003	4.922658e+002	4678.5	31	5.286145e+000	0	0	0	0	0	0	4697.91	1	1	46.8651	31.12
DATA	639	8	44	0	0	A_42_P759822	NM_001109673	7844.5	241.5	6.467172e+002	6.474530e+001	692	32	6.116516e+000	0	0	0	0	0	0	615.169	1	1	57.5363	32
DATA	640	8	45	0	0	A_64_P014687	NM_012650	7869.94	240.825	1.277490e+004	1.277493e+003	12552	33	8.356570e+000	0	0	0	0	0	0	12107.1	1	1	45.4864	32.0323
DATA	641	8	46	0	0	A_43_P18505	NM_001012010	7895.42	241.427	7.248011e+001	7.886266e+000	130.5	34.5	7.312230e+000	0	0	0	0	0	0	68.4497	1	1	57.5363	32.8684
DATA	642	8	47	0	0	A_43_P12580	NM_031548	7920.6	240.97	1.632402e+002	1.661950e+001	215	30	9.342459e+000	0	0	0	0	0	0	153.571	1	1	45.835	32.8077
DATA	643	8	48	0	0	A_64_P052980	NM_001014786	7946.11	241.5	2.073194e+001	3.755820e+000	82	36	9.892515e+000	0	0	0	0	0	0	19.4303	1	1	56.9804	35.3235
DATA	644	8	49	0	0	A_64_P397764	ENSRNOT00000028709	7971.43	241.392	5.928019e+002	5.936353e+001	617.5	35	7.909747e+000	0	0	0	0	0	0	553.355	1	1	49.1849	36.8889
DATA	645	8	50	0	0	A_64_P048408	NM_001008858	7996.31	241.405	1.868852e+002	1.895330e+001	235	31.5	6.469648e+000	0	0	0	0	0	0	173.749	1	1	48.5334	31.0278
DATA	647	8	52	0	0	A_64_P059500	ENSRNOT00000043917	8047.5	241.5	6.232705e+000	3.244649e+000	69	34	6.792152e+000	0	0	0	0	0	0	5.74518	1	0	57.5363	33.0667
DATA	648	8	53	0	0	A_64_P220198	AW917371	8073.06	241.227	1.643793e+001	3.596240e+000	75	34	7.129674e+000	0	0	0	0	0	0	15.0842	1	1	45.835	34.0323
DATA	649	8	54	0	0	A_64_P109764	NM_001007756	8098.36	241.12	4.456050e+002	4.467619e+001	460	30	5.963658e+000	0	0	0	0	0	0	407.072	1	1	48.8603	30.2609
DATA	650	8	55	0	0	A_64_P142685	NM_001130498	8123.67	241.5	2.694305e+001	4.204172e+000	87	32	9.022763e+000	0	0	0	0	0	0	24.5037	1	1	57.5363	32.2222
DATA	651	8	56	0	0	A_44_P395709	NM_134366	8149.28	241.169	1.370553e+003	1.370936e+002	1306	29	5.635770e+000	0	0	0	0	0	0	1240.54	1	1	45.4864	29.1905
DATA	652	8	57	0	0	A_64_P165071	NM_001110165	8174.44	241.534	1.643645e+004	1.643649e+003	14644	32.5	9.018720e+000	0	0	0	0	0	0	14809.3	1	1	49.1849	32.6786
DATA	653	8	58	0	0	A_64_P009147	ENSRNOT00000042587	8200.03	241.721	9.315959e+001	9.874257e+000	147.5	31	1.123956e+001	0	0	0	0	0	0	83.5381	1	1	46.1809	33.7143
DATA	654	8	59	0	0	A_42_P647072	NM_178102	8225.38	241.556	1.605970e+003	1.606306e+002	1476.5	27	8.086966e+000	0	0	0	0	0	0	1433.11	1	1	48.2044	29.5517
DATA	655	8	60	0	0	A_64_P125585	XM_001063000	8250.67	241.5	3.179908e+001	4.586573e+000	92	30	8.371354e+000	0	0	0	0	0	0	28.2383	1	1	57.5363	32.2903
DATA	656	8	61	0	0	A_42_P610317	NM_001108225	8275.75	241.356	8.605567e+003	8.605631e+002	7289	31	7.263960e+000	0	0	0	1	0	0	7604.48	1	1	48.5334	30.5938
DATA	657	8	62	0	0	A_42_P755831	NM_152935	8301.24	241.529	2.692138e+004	2.692140e+003	22948	33	1.017386e+001	0	0	0	0	0	0	23672.1	1	1	47.2035	34.6897
DATA	659	8	64	0	0	A_44_P386375	NM_053842	8352.12	241.418	4.740122e+002	4.752100e+001	475.5	29.5	8.396770e+000	0	0	0	0	0	0	412.612	1	1	46.1809	31.3333
DATA	660	8	65	0	0	A_43_P15565	NM_023953	8377.6	241.611	1.637641e+001	3.763877e+000	77.5	31	7.999763e+000	0	0	0	0	0	0	14.1836	1	0	47.8731	31.9394
DATA	661	8	66	0	0	A_42_P456701	NM_001009697	8403.42	241.573	1.560336e+003	1.560708e+002	1397.5	33	9.537843e+000	0	0	0	0	0	0	1344.42	1	1	57.5363	33.5517
DATA	662	8	67	0	0	A_43_P20388	ENSRNOT00000061333	8428.27	241.493	9.754729e+002	9.760736e+001	865	33	7.124368e+000	0	0	0	0	0	0	836.282	1	1	48.8603	31.3571
DATA	663	8	68	0	0	A_44_P572504	TC585660	8453.92	241.507	5.384715e+002	5.395701e+001	533	33	7.615208e+000	0	0	0	0	0	0	459.262	1	1	45.835	31.4839
DATA	664	8	69	0	0	A_64_P059964	NM_001013858	8479.2	241.386	5.250207e+003	5.250321e+002	4476	30	8.435177e+000	0	0	0	0	0	0	4455.02	1	1	47.2035	31.4063
DATA	665	8	70	0	0	A_44_P1056293	ENSRNOT00000022862	8505.06	241.382	1.948248e+003	1.948558e+002	1680	30.5	7.596423e+000	0	0	0	0	0	0	1644.59	1	1	46.1809	30.6875
DATA	666	8	71	0	0	A_64_P133276	NM_001107464	8530.15	241.5	1.273750e+003	1.274229e+002	1122	32	9.086592e+000	0	0	0	0	0	0	1069.85	1	1	47.2035	33.6154
DATA	667	8	72	0	0	A_42_P667782	NM_001009673	8555.23	241.288	1.749493e+003	1.749846e+002	1472.5	30	6.799802e+000	0	0	0	1	0	0	1461.99	1	1	45.4864	30.3611
DATA	668	8	73	0	0	A_64_P023624	A_64_P023624	8580.81	241.588	4.695637e+002	4.708887e+001	449.5	28	8.608928e+000	0	0	0	0	0	0	390.434	1	1	46.5243	30.6364
DATA	669	8	74	0	0	A_64_P110130	NM_001106172	8606.24	241.667	8.523186e+002	8.530567e+001	784	28	8.000248e+000	0	0	0	0	0	0	705.136	1	1	49.1849	29.6786
DATA	670	8	75	0	0	A_64_P087728	XM_001078778	8631.58	241.573	2.151050e+002	2.180403e+001	239	32.5	8.572381e+000	0	0	0	0	0	0	177.068	1	1	57.5363	33
DATA	671	8	76	0	0	A_44_P475356	NM_001177823	8657.12	241.84	3.799740e+002	3.816598e+001	369	31.5	7.216237e+000	0	0	0	0	0	0	311.248	1	1	48.2044	30
DATA	672	8	77	0	0	A_42_P560984	NM_001109179	8682.37	241.64	2.017958e+004	2.017961e+003	15529.5	30	7.966668e+000	0	0	0	1	0	0	16447.9	1	1	48.8603	31.697
DATA	673	8	78	0	0	A_42_P566906	NM_001006966	8707.77	241.884	4.340707e+003	4.340858e+002	3473	32	8.569734e+000	0	0	0	0	0	0	3521.06	1	1	46.5243	33.1714
DATA	674	8	79	66	1	DarkCorner	DarkCorner	8733.5	242	3.649214e+000	3.636008e+000	58	30.5	7.575161e+000	0	0	0	0	0	0	-4.22439	0	0	54.1152	30.6875
DATA	675	8	80	66	1	DarkCorner	DarkCorner	8758.52	241.928	3.666462e+000	3.653193e+000	52	32	8.748061e+000	0	0	0	0	0	0	-6.78113	0	0	47.8731	32.8571
DATA	676	8	81	66	1	DarkCorner	DarkCorner	8784.09	241.935	3.683835e+000	3.670503e+000	54	28	7.290864e+000	0	0	0	0	0	0	-6.74105	0	0	54.4085	28.1852
DATA	677	8	82	66	1	DarkCorner	DarkCorner	8809.49	241.93	3.700920e+000	3.687526e+000	61	28	6.060474e+000	0	0	0	0	0	0	-0.133229	0	0	47.8731	26.963
DATA	678	8	83	66	1	DarkCorner	DarkCorner	8834.59	241.941	3.717574e+000	3.704120e+000	59	31	8.262076e+000	0	0	0	0	0	0	-0.896319	0	0	46.5243	33.8095
DATA	679	8	84	66	1	DarkCorner	DarkCorner	8860.5	242	3.734471e+000	3.721621e+000	62	29	8.777660e+000	0	0	0	0	0	0	0.55518	0	0	54.1152	30.7742
DATA	680	8	85	66	1	DarkCorner	DarkCorner	8885.99	241.64	5.424924e+000	3.776930e+000	64	27	7.217037e+000	0	0	0	0	0	0	4.26002	1	0	48.2044	28.3361
DATA	681	9	1	66	1	DarkCorner	DarkCorner	6739.69	248.189	4.605337e+000	3.268436e+000	68	26	7.330521e+000	0	0	0	0	0	0	4.1774	1	0	48.5334	27.3757
DATA	682	9	2	66	1	DarkCorner	DarkCorner	6765.9	248.279	3.223683e+000	3.212016e+000	63	30	9.658173e+000	0	0	0	0	0	0	-0.82954	0	0	50.7771	31.0303
DATA	683	9	3	66	1	DarkCorner	DarkCorner	6790.79	248.028	3.202577e+000	3.190986e+000	58.5	30	7.019712e+000	0	0	0	0	0	0	-1.88282	0	0	46.8651	31.2593
DATA	684	9	4	66	1	DarkCorner	DarkCorner	6815.86	248.066	3.182259e+000	3.170743e+000	59	32.5	6.593247e+000	0	0	0	0	0	0	-4.21599	0	0	47.8731	31.7143
DATA	685	9	5	66	1	DarkCorner	DarkCorner	6841.22	247.818	3.163164e+000	3.151716e+000	58	33	9.601031e+000	0	0	0	0	0	0	-5.54168	0	0	48.8603	33.5862
DATA	686	9	6	66	1	DarkCorner	DarkCorner	6866.5	248	3.144914e+000	3.133532e+000	59	32	8.109625e+000	0	0	0	0	0	0	-3.77627	0	0	54.1152	32.1379
DATA	687	9	7	66	1	DarkCorner	DarkCorner	6892.5	248.095	3.127413e+000	3.116095e+000	58.5	32	9.253828e+000	0	0	0	0	0	0	-4.26216	0	0	48.5334	33.6667
DATA	688	9	8	0	0	A_44_P195306	NM_019377	6917.5	248	4.118358e+004	4.118359e+003	37437	32	5.732115e+000	0	0	0	0	0	0	38986.2	1	1	54.1152	33
DATA	689	9	9	0	0	A_44_P653240	NM_001202552	6942.87	248.227	1.044422e+003	1.044878e+002	1010	30	6.184984e+000	0	0	0	0	0	0	993.487	1	1	47.8731	30.4375
DATA	690	9	10	0	0	A_64_P012778	ENSRNOT00000038310	6968.5	248	7.962410e+000	3.173485e+000	70	31	9.643651e+000	0	0	0	0	0	0	7.60778	1	0	54.1152	33
DATA	691	9	11	0	0	A_43_P11430	NM_001130503	6993.52	248.137	4.732781e+002	4.742658e+001	507	30.5	9.500477e+000	0	0	0	0	0	0	454.066	1	1	47.8731	31.5417
DATA	692	9	12	0	0	A_44_P225353	NM_001009678	7019.11	248.162	7.499770e+002	7.505959e+001	754.5	30	9.987492e+000	0	0	0	0	0	0	722.326	1	1	47.5395	32
DATA	693	9	13	0	0	A_64_P055231	NM_001106620	7044.43	248	1.293710e+003	1.294067e+002	1321	29	5.490251e+000	0	0	0	0	0	0	1250.36	1	1	49.1849	28.9286
DATA	694	9	14	0	0	A_42_P540950	NM_001009541	7070	248	1.005992e+003	1.006447e+002	1041.5	33	1.157119e+001	0	0	0	0	0	0	975.458	1	1	54.9904	35.3226
DATA	695	9	15	0	0	A_64_P135888	ENSRNOT00000029916	7095.5	248	6.797146e+000	3.093686e+000	69	34	9.699754e+000	0	0	0	0	0	0	6.61035	1	0	65	33.0909
DATA	696	9	16	0	0	A_64_P086448	NM_001008819	7120.73	248.152	1.424273e+002	1.455732e+001	202.5	37.5	1.048947e+001	0	0	0	0	0	0	138.884	1	1	45.835	37.85
DATA	697	9	17	0	0	A_42_P701779	NM_001108048	7145.79	248.26	2.128026e+003	2.128238e+002	2037.5	30	5.831292e+000	0	0	0	0	0	0	2080.02	1	1	48.5334	30.8214
DATA	698	9	18	0	0	A_44_P409965	ENSRNOT00000036078	7171.5	248.352	3.182622e+001	4.371249e+000	92	32	7.026405e+000	0	0	0	0	0	0	31.1751	1	1	57.5363	31.7037
DATA	699	9	19	0	0	A_44_P474037	NM_052807	7197	248.455	1.402845e+002	1.434374e+001	197	33	9.332333e+000	0	0	0	0	0	0	137.67	1	1	55.8519	34.7143
DATA	700	9	20	0	0	A_64_P156985	NM_001000385	7222.42	248.427	3.160839e+000	3.002945e+000	64	31	6.280708e+000	0	0	0	0	0	0	3.10674	1	0	65	33.2963
DATA	701	9	21	0	0	A_42_P635228	NM_001107651	7247.58	248.427	6.591147e+001	7.234510e+000	129	32	6.970875e+000	0	0	0	0	0	0	64.8665	1	1	57.5363	32.6
DATA	702	9	22	0	0	A_64_P240508	ENSRNOT00000018000	7273.42	248.427	4.194637e+002	4.205204e+001	480	32	8.726617e+000	0	0	0	0	0	0	413.249	1	1	65	35
DATA	703	9	23	0	0	A_64_P026509	NM_020656	7298.5	248.352	1.284883e+002	1.318921e+001	188.5	32	1.084889e+001	0	0	0	0	0	0	126.68	1	1	65	33.5385
DATA	704	9	24	0	0	A_42_P570241	NM_177928	7324	248.455	3.327089e+002	3.340367e+001	390	34	8.065518e+000	0	0	0	0	0	0	328.213	1	1	55.8519	32.9118
DATA	706	9	26	0	0	A_64_P032893	TC597420	7374.58	248.427	3.892228e+004	3.892229e+003	37281	34	5.320497e+000	0	0	0	0	0	0	38409.7	1	1	57.5363	32.3333
DATA	707	9	27	0	0	A_64_P043605	NM_001024799	7400.04	248.446	6.303465e+003	6.303535e+002	6092	33.5	1.040214e+001	0	0	0	0	0	0	6219.42	1	1	48.5334	33.2692
DATA	708	9	28	0	0	A_64_P095890	NM_019337	7425.44	248.517	1.887050e+004	1.887052e+003	18338	31	6.014740e+000	0	0	0	0	0	0	18611.8	1	1	52.9257	31.3421
DATA	709	9	29	0	0	A_42_P513145	NM_001107288	7450.45	247.901	5.566776e+002	5.574737e+001	600	27.5	8.805942e+000	0	0	0	0	0	0	548.636	1	1	47.8731	29.7692
DATA	710	9	30	0	0	A_64_P122317	NM_001108031	7475.96	248.06	2.220229e+002	2.240146e+001	280	28	6.976605e+000	0	0	0	0	0	0	218.641	1	1	46.8651	29.8889
DATA	711	9	31	0	0	A_64_P065492	NM_001109101	7501.58	248.427	3.848772e+001	4.869703e+000	97	32.5	6.381006e+000	0	0	0	0	0	0	37.8647	1	1	57.5363	31.2
DATA	712	9	32	0	0	A_64_P129273	NM_001105871	7527.11	248.5	7.687159e+001	8.247150e+000	137	31	4.720244e+000	0	0	0	0	0	0	75.5334	1	1	65	30.6667
DATA	713	9	33	0	0	A_64_P050748	NM_181824	7552.5	248.5	4.548200e+001	5.443817e+000	104	32	7.172677e+000	0	0	0	0	0	0	44.6254	1	1	65	31.7037
DATA	714	9	34	0	0	A_42_P689755	NM_053306	7577.67	248.5	5.165406e+001	5.971572e+000	112	32	6.828692e+000	0	0	0	0	0	0	50.5986	1	1	57.5363	31.7
DATA	715	9	35	0	0	A_64_P039586	TC635481	7602.85	248.712	3.517852e+002	3.530635e+001	400	30	7.473394e+000	0	0	0	0	0	0	343.988	1	1	48.2044	29.5806
DATA	716	9	36	0	0	A_64_P083474	NM_001134731	7628.07	248.732	1.059871e+004	1.059876e+003	10237	30.5	7.661693e+000	0	0	0	0	0	0	10343.1	1	1	47.5395	31.3077
DATA	718	9	38	0	0	A_42_P763553	NM_001107486	7679.37	248.441	1.339896e+002	1.373548e+001	188.5	31	7.569781e+000	0	0	0	0	0	0	130.147	1	1	46.8651	31.8889
DATA	719	9	39	0	0	A_44_P151513	NM_001000901	7704.98	248.629	1.187429e+001	3.253841e+000	75	29	6.640857e+000	0	0	0	0	0	0	11.5047	1	0	44.0646	30.6207
DATA	720	9	40	0	0	A_42_P460204	ENSRNOT00000020886	7729.79	248.618	4.155048e+002	4.166136e+001	479	33.5	6.847770e+000	0	0	0	0	0	0	401.509	1	1	46.5243	32.0667
DATA	721	9	41	0	0	A_44_P218147	NM_001013432	7755.39	248.42	4.017513e+001	5.041907e+000	102	33	6.748350e+000	0	0	0	0	0	0	38.7083	1	1	47.5395	33.3333
DATA	722	9	42	0	0	A_42_P554722	NM_001099758	7780.86	248.684	1.383554e+004	1.383557e+003	13157	31	5.892769e+000	0	0	0	0	0	0	13290.9	1	1	49.5074	31.4839
DATA	723	9	43	0	0	A_44_P135450	XM_223143	7806.5	248.5	4.714835e+002	4.724789e+001	517.5	31	8.601710e+000	0	0	0	0	0	0	451.46	1	1	57.5363	33.2857
DATA	724	9	44	0	0	A_64_P107329	NM_001013207	7831.57	248.843	1.018011e+004	1.018015e+003	9535.5	31	4.884329e+000	0	0	0	0	0	0	9716.77	1	1	47.5395	32.24
DATA	725	9	45	0	0	A_64_P116219	NM_001004085	7857.06	248.618	1.996383e+004	1.996386e+003	18957	31	8.220954e+000	0	0	0	0	0	0	18988.5	1	1	46.1809	32.1622
DATA	726	9	46	0	0	A_44_P147396	NM_001191744	7882.08	248.303	3.784005e+001	4.889811e+000	99	34.5	8.375203e+000	0	0	0	0	0	0	35.8623	1	1	45.835	33.619
DATA	727	9	47	0	0	A_44_P975743	TC626448	7907.94	248.611	1.981134e+003	1.981377e+002	1892	34	5.875643e+000	0	0	0	0	0	0	1870.66	1	1	48.2044	33.8438
DATA	728	9	48	0	0	A_42_P728472	NM_001007600	7933.13	248.623	9.282448e+003	9.282500e+002	8356	31	8.774719e+000	0	0	0	0	0	0	8731.68	1	1	46.8651	32.9355
DATA	729	9	49	0	0	A_64_P130139	NM_013181	7958.41	248.632	1.428682e+004	1.428685e+003	13177.5	38.5	9.311366e+000	0	0	0	0	0	0	13386.6	1	1	49.5074	38.6923
DATA	730	9	50	0	0	A_42_P481087	XM_232226	7983.8	248.761	1.629579e+003	1.629883e+002	1516	33	7.191519e+000	0	0	0	0	0	0	1520.78	1	1	46.8651	34.2222
DATA	731	9	51	0	0	A_44_P102465	NM_001000424	8009.92	249.015	6.927675e+001	7.613685e+000	126.5	30	6.343424e+000	0	0	0	0	0	0	64.3799	1	1	46.8651	30.2439
DATA	732	9	52	0	0	A_64_P082557	ENSRNOT00000029274	8035	248.545	2.122952e+001	3.816911e+000	82	29	4.281744e+000	0	0	0	0	0	0	19.6441	1	1	65	30.4
DATA	733	9	53	0	0	A_64_P064873	XM_228599	8060.61	249.313	4.294049e+001	5.346545e+000	103	34	8.282442e+000	0	0	0	0	0	0	39.5672	1	1	46.1809	33.5667
DATA	734	9	54	0	0	A_64_P042298	A_64_P042298	8085.75	248.627	9.742785e+001	1.025482e+001	153	30	5.401352e+000	0	0	0	0	0	0	89.3663	1	1	49.1849	30.7143
DATA	735	9	55	0	0	A_44_P286341	ENSRNOT00000038519	8110.87	248.522	1.773688e+001	3.671222e+000	78	30.5	9.041666e+000	0	0	0	0	0	0	16.1964	1	1	46.5243	30.2
DATA	736	9	56	0	0	A_44_P994614	NM_001106646	8136.5	248.648	4.466301e+004	4.466303e+003	40738.5	30	9.988686e+000	0	0	0	0	0	0	40596.5	1	1	57.5363	30.4231
DATA	737	9	57	0	0	A_64_P098354	XM_001066867	8162	248.545	2.032876e+002	2.058603e+001	243	29	7.827817e+000	0	0	0	0	0	0	183.91	1	1	65	30.3667
DATA	738	9	58	0	0	A_64_P117373	NM_001107752	8187.42	248.573	1.009980e+002	1.061283e+001	150	33	1.029572e+001	0	0	0	0	0	0	90.9401	1	1	57.5363	33.5758
DATA	739	9	59	0	0	A_64_P111395	ENSRNOT00000025391	8212.58	248.573	3.708706e+002	3.723141e+001	390	31	1.136340e+001	0	0	0	0	0	0	332.356	1	1	57.5363	32.4242
DATA	740	9	60	0	0	A_64_P059465	XM_229201	8238.09	248.614	1.718319e+001	3.712796e+000	75	28.5	7.361580e+000	0	0	0	0	0	0	15.3241	1	1	57.259	30.0833
DATA	741	9	61	0	0	A_64_P010852	NM_001106214	8263.5	248.648	3.279712e+004	3.279714e+003	28568	31	9.875002e+000	0	0	0	0	0	0	29106.1	1	1	57.5363	33.1481
DATA	742	9	62	0	0	A_64_P024967	NM_001008359	8288.91	248.614	7.971478e+001	8.636668e+000	129	30	8.888150e+000	0	0	0	0	0	0	70.394	1	1	57.259	31.0278
DATA	743	9	63	0	0	A_44_P278418	NM_012538	8314.52	248.97	3.284024e+001	4.684207e+000	90	31	9.836494e+000	0	0	0	0	0	0	28.8578	1	1	46.1809	32.3571
DATA	744	9	64	0	0	A_44_P821875	NM_001009500	8339.57	248.824	4.139653e+001	5.329673e+000	99	28	8.631911e+000	0	0	0	0	0	0	36.1958	1	1	46.8651	28.3478
DATA	745	9	65	0	0	A_64_P066737	A_64_P066737	8365.09	248.935	6.756293e+001	7.551834e+000	120	30	1.152928e+001	0	0	0	0	0	0	58.7782	1	1	54.4085	34.5
DATA	746	9	66	0	0	A_64_P003943	TC616650	8390.3	248.971	9.993691e+001	1.055326e+001	151	32	9.745531e+000	0	0	0	0	0	0	86.5081	1	1	46.1809	33.2414
DATA	747	9	67	0	0	A_64_P047035	ENSRNOT00000066263	8415.61	248.931	1.570585e+001	3.752502e+000	75.5	32	1.017464e+001	0	0	0	0	0	0	13.5267	1	0	53.8203	32.76
DATA	748	9	68	0	0	A_64_P113867	NM_001077201	8441.44	248.973	4.766471e+002	4.778765e+001	474	32	6.583525e+000	0	0	0	0	0	0	408.399	1	1	48.5334	29.9697
DATA	749	9	69	0	0	A_64_P013758	NM_012582	8466.71	249.059	8.250116e+001	8.939710e+000	133.5	29.5	1.044936e+001	0	0	0	0	0	0	70.3328	1	1	45.835	32.3214
DATA	750	9	70	0	0	A_44_P303982	NM_001106381	8492	249	8.095074e+001	8.803717e+000	133	31	8.531687e+000	0	0	0	0	0	0	68.6609	1	1	65	32.3056
DATA	751	9	71	0	0	A_64_P048601	A_64_P048601	8517.44	248.894	6.106781e+002	6.116679e+001	584	32	1.009443e+001	0	0	0	0	0	0	515.319	1	1	45.4864	33.2647
DATA	752	9	72	0	0	A_44_P304880	NM_001014261	8542.92	248.985	9.381269e+001	1.001149e+001	137	31	8.496434e+000	0	0	0	0	0	0	78.7637	1	1	46.8651	32.7576
DATA	753	9	73	0	0	A_64_P096767	ENSRNOT00000039549	8568.5	249	3.526547e+000	3.514230e+000	62	28	6.651078e+000	0	0	0	0	0	0	0.467931	0	0	54.1152	28.9211
DATA	754	9	74	0	0	A_43_P21810	NM_001025000	8593.82	249.028	2.505346e+001	4.329864e+000	84	29	8.258896e+000	0	0	0	0	0	0	20.8232	1	1	46.8651	30.069
DATA	756	9	76	0	0	A_64_P084976	NM_001008916	8644.5	249	3.579716e+000	3.571335e+000	65	31.5	7.186833e+000	0	0	0	0	0	0	1.48711	0	0	54.1152	29.9333
DATA	757	9	77	0	0	A_64_P040004	XM_001054754	8669.7	248.9	4.260803e+003	4.260954e+002	3367	28.5	6.999918e+000	0	0	0	0	0	0	3489.08	1	1	47.2035	30.0333
DATA	758	9	78	0	0	A_64_P156785	XM_001058828	8695.26	249.028	3.614949e+000	3.603182e+000	64	27.5	6.767925e+000	0	0	0	0	0	0	0.793472	0	0	47.5395	28.2059
DATA	759	9	79	0	0	A_64_P123914	XM_217505	8721	249	2.625381e+004	2.625384e+003	21296	31	8.210262e+000	0	0	0	0	0	0	21289.5	1	1	46.8651	31.3784
DATA	760	9	80	66	1	DarkCorner	DarkCorner	8746.06	248.845	3.650030e+000	3.636820e+000	56	31	7.373904e+000	0	0	0	0	0	0	-5.14421	0	0	46.8651	30.7727
DATA	761	9	81	66	1	DarkCorner	DarkCorner	8771.32	249.103	3.666871e+000	3.653600e+000	57	30	7.056548e+000	0	0	0	0	0	0	-4.80395	0	0	49.1849	30.2222
DATA	762	9	82	66	1	DarkCorner	DarkCorner	8796.5	249	3.683897e+000	3.670564e+000	54	28	6.250867e+000	0	0	0	0	0	0	-7.62086	0	0	54.1152	28.36
DATA	763	9	83	66	1	DarkCorner	DarkCorner	8822.39	249.069	3.700998e+000	3.687604e+000	54.5	28	7.646407e+000	0	0	0	0	0	0	-5.24811	0	0	53.8203	29.0909
DATA	764	9	84	66	1	DarkCorner	DarkCorner	8847.61	249.347	3.717177e+000	3.703724e+000	56	29	8.204438e+000	0	0	0	0	0	0	-3.68389	0	0	47.8731	31.2069
DATA	765	9	85	66	1	DarkCorner	DarkCorner	8873.35	249.338	3.733782e+000	3.728914e+000	61	28.5	8.341105e+000	0	0	0	0	0	0	2.00216	0	0	47.8731	29.8542
DATA	766	10	1	66	1	DarkCorner	DarkCorner	6752.56	255.224	4.137135e+000	3.243662e+000	66	30	1.365579e+001	0	0	0	0	0	0	3.77447	1	0	51.7088	33.3415
DATA	767	10	2	66	1	DarkCorner	DarkCorner	6777.74	255.089	3.206891e+000	3.195286e+000	61	32.5	6.276105e+000	0	0	0	0	0	0	-2.09372	0	0	52.9257	32.2083
DATA	768	10	3	66	1	DarkCorner	DarkCorner	6803.42	255.427	3.185329e+000	3.173802e+000	57	29.5	7.203302e+000	0	0	0	0	0	0	-5.16587	0	0	57.5363	31.0357
DATA	769	10	4	66	1	DarkCorner	DarkCorner	6828.7	255.451	3.165616e+000	3.154159e+000	57	33	8.754872e+000	0	0	0	0	0	0	-5.18576	0	0	51.4001	34.1724
DATA	770	10	5	66	1	DarkCorner	DarkCorner	6854.09	255.287	3.147164e+000	3.135775e+000	60	32.5	9.717792e+000	0	0	0	0	0	0	-1.69375	0	0	49.8279	33.375
DATA	771	10	6	66	1	DarkCorner	DarkCorner	6879.67	255.143	3.129719e+000	3.118392e+000	60	30	6.657445e+000	0	0	0	0	0	0	-2.52006	0	0	51.4001	30.5313
DATA	772	10	7	0	0	A_64_P139937	XM_001070013	6904.89	255.5	4.645365e+000	3.136521e+000	68	35	8.139804e+000	0	0	0	0	0	0	4.3956	1	0	65	34.8889
DATA	773	10	8	0	0	A_44_P185613	XM_001080030	6930.5	255.5	1.451080e+002	1.483545e+001	203.5	32.5	5.370415e+000	0	0	0	0	0	0	137.987	1	1	49.1849	32.3529
DATA	774	10	9	0	0	A_42_P738520	NM_001007746	6955.37	255.64	1.863401e+003	1.863655e+002	1806	31	5.625289e+000	0	0	0	0	0	0	1780	1	1	48.8603	31.4815
DATA	775	10	10	66	-1	(-)3xSLv1	NegativeControl	6981.33	255.5	3.070501e+000	3.059389e+000	59	29	6.958533e+000	0	0	0	0	0	0	-3.51885	0	0	57.5363	29.7241
DATA	776	10	11	0	0	A_42_P626023	NM_001107265	7006.36	255.684	8.580748e+002	8.586157e+001	883	31	1.001956e+001	0	0	0	0	0	0	826.491	1	1	49.1849	32.0345
DATA	777	10	12	0	0	A_43_P11120	XR_085824	7031.4	255.818	3.405641e+003	3.405776e+002	3303	29	5.686820e+000	0	0	0	0	0	0	3292.27	1	1	50.1463	28.3913
DATA	778	10	13	0	0	A_42_P473425	NM_138844	7057.18	255.493	8.777945e+001	9.284918e+000	147	32	6.808955e+000	0	0	0	0	0	0	85.1408	1	1	47.8731	32.8378
DATA	779	10	14	0	0	A_44_P692981	ENSRNOT00000007422	7082.24	255.434	4.885025e+001	5.741584e+000	109	36	1.083940e+001	0	0	0	0	0	0	47.5249	1	1	49.5074	34.7241
DATA	780	10	15	0	0	A_64_P102366	A_64_P102366	7108.11	255.5	4.342042e+001	5.282415e+000	106	34	7.659184e+000	0	0	0	0	0	0	42.363	1	1	56.9804	33.9412
DATA	781	10	16	0	0	A_42_P616287	NM_001134555	7133.37	255.211	1.532972e+002	1.562074e+001	214.5	31	8.285762e+000	0	0	0	0	0	0	149.925	1	1	47.5395	33.4231
DATA	782	10	17	0	0	A_64_P073995	XM_001081370	7158.67	255.5	3.115209e+001	4.320944e+000	93	30	6.106136e+000	0	0	0	0	0	0	30.5364	1	1	57.5363	31.1481
DATA	783	10	18	0	0	A_42_P595381	NM_001107258	7183.97	255.558	4.547941e+003	4.548039e+002	4452	34	9.021069e+000	0	0	0	0	0	0	4466.77	1	1	49.1849	34.1176
DATA	784	10	19	0	0	A_42_P462205	NM_001007745	7209.32	255.727	7.955721e+003	7.955776e+002	7645	32	8.613334e+000	0	0	0	0	0	0	7827.13	1	1	49.8279	33.0625
DATA	785	10	20	0	0	A_64_P016102	A_64_P016102	7235	255.545	3.781370e+001	4.814005e+000	100.5	30.5	5.546031e+000	0	0	0	0	0	0	37.2541	1	1	55.8519	30.9615
DATA	786	10	21	0	0	A_64_P017829	NM_001128216	7260.42	255.573	3.296681e+000	2.993995e+000	64	32	6.714412e+000	0	0	0	0	0	0	3.25166	1	0	65	33.6
DATA	787	10	22	0	0	A_64_P090244	NM_001127449	7285.58	255.573	1.512960e+005	1.512960e+004	149056	29.5	8.185617e+000	0	0	0	0	0	0	149363	1	1	57.5363	31.3636
DATA	788	10	23	0	0	A_42_P503626	NM_001044247	7311.48	255.616	6.272866e+001	6.940929e+000	126.5	29	8.465223e+000	0	0	0	0	0	0	61.9689	1	1	48.5334	30.92
DATA	789	10	24	0	0	A_64_P144850	ENSRNOT00000002335	7336.4	255.324	6.159170e+001	6.837922e+000	122	34	7.571878e+000	0	0	0	0	0	0	60.8659	1	1	46.8651	33.7778
DATA	790	10	25	0	0	A_42_P703023	NM_145776	7362	255.545	3.514579e+002	3.527102e+001	414.5	31	7.637345e+000	0	0	0	0	0	0	347.394	1	1	55.8519	30.9355
DATA	791	10	26	0	0	A_64_P153581	NM_001109367	7387.42	255.573	7.442376e+001	8.012981e+000	135	33	8.441351e+000	0	0	0	0	0	0	73.5588	1	1	57.5363	30.8889
DATA	792	10	27	0	0	A_44_P156782	NM_001013879	7412.29	255.575	1.317111e+003	1.317446e+002	1333	30.5	6.930112e+000	0	0	0	0	0	0	1301.44	1	1	50.7771	30.2143
DATA	793	10	28	0	0	A_43_P12841	NM_053535	7438.42	255.573	2.226591e+002	2.246339e+001	285	30.5	7.161058e+000	0	0	0	0	0	0	219.893	1	1	57.5363	30.8529
DATA	794	10	29	0	0	A_64_P097715	NM_001135710	7463.27	255.689	1.612231e+002	1.639434e+001	224	28.5	7.853891e+000	0	0	0	0	0	0	159.11	1	1	48.2044	29.7941
DATA	795	10	30	0	0	A_42_P769597	NM_001106230	7488.8	255.518	1.334112e+003	1.334444e+002	1382	28.5	6.829702e+000	0	0	0	0	0	0	1315.33	1	1	51.7088	30.1
DATA	796	10	31	0	0	A_42_P561835	ENSRNOT00000043937	7513.69	255.904	2.557037e+002	2.574345e+001	312.5	30	5.670388e+000	0	0	0	0	0	0	251.842	1	1	48.8603	30.7059
DATA	797	10	32	0	0	A_42_P604399	NM_012941	7539.43	255.761	2.068225e+004	2.068227e+003	20484	34	6.616693e+000	0	0	0	0	0	0	20341.4	1	1	46.5243	33.6296
DATA	798	10	33	0	0	A_42_P744495	NM_017125	7564.65	255.88	2.460184e+003	2.460366e+002	2433	33	5.490733e+000	0	0	0	0	0	0	2415.98	1	1	48.8603	32.0741
DATA	799	10	34	0	0	A_64_P047391	A_64_P047391	7590.28	255.905	6.021103e+002	6.028542e+001	655	28	7.225850e+000	0	0	0	0	0	0	590.258	1	1	48.8603	29.2903
DATA	800	10	35	0	0	A_44_P856007	NM_001108489	7615.91	255.935	1.374480e+002	1.406837e+001	194	31	6.764728e+000	0	0	0	0	0	0	134.482	1	1	54.4085	32.1923
DATA	801	10	36	0	0	A_64_P057562	ENSRNOT00000031129	7640.68	256.081	6.523157e+002	6.530080e+001	698	32.5	8.222182e+000	0	0	0	0	0	0	636.947	1	1	48.8603	31.1765
DATA	802	10	37	0	0	A_64_P102395	ENSRNOT00000029656	7666.5	256	1.895909e+002	1.919701e+001	246	29	8.640750e+000	0	0	0	0	0	0	184.691	1	1	54.1152	30.3448
DATA	803	10	38	0	0	A_64_P132318	NM_133296	7691.76	256	3.387851e+002	3.401288e+001	389	29	6.550483e+000	0	0	0	0	0	0	329.226	1	1	46.8651	30.7037
DATA	805	10	40	0	0	A_64_P158848	NM_001130540	7742.78	255.866	2.386954e+003	2.387148e+002	2393	34	8.265878e+000	0	0	0	0	0	0	2306.98	1	1	46.1809	34.4839
DATA	806	10	41	0	0	A_64_P302888	NM_001135015	7768.3	255.948	7.031724e+001	7.663037e+000	130	30	5.602452e+000	0	0	0	0	0	0	67.7624	1	1	49.1849	30.1852
DATA	807	10	42	0	0	A_42_P604331	NM_001108533	7793.5	256	1.035698e+005	1.035698e+004	99900	31	4.293364e+000	0	0	0	0	0	0	99502.8	1	1	54.1152	32.4583
DATA	808	10	43	0	0	A_64_P166406	NM_019152	7818.75	255.958	7.025991e+002	7.032673e+001	739	30.5	4.849735e+000	0	0	0	0	0	0	672.84	1	1	47.2035	29.9583
DATA	809	10	44	0	0	A_64_P123660	NM_001031655	7843.93	256	2.518570e+003	2.518758e+002	2322	30	6.055775e+000	0	0	0	0	0	0	2403.88	1	1	46.8651	30.5
DATA	810	10	45	0	0	A_42_P668800	NM_001127553	7869.57	255.843	2.054381e+003	2.054612e+002	1922.5	34	5.981528e+000	0	0	0	0	0	0	1953.84	1	1	47.5395	33.1026
DATA	811	10	46	0	0	A_64_P090458	NM_001109516	7895.5	256	1.048956e+001	3.270328e+000	71	34	7.766335e+000	0	0	0	0	0	0	9.93966	1	0	54.1152	32.4857
DATA	812	10	47	0	0	A_42_P635396	NM_001109506	7920.38	256	3.661069e+003	3.661201e+002	3358	33	7.881106e+000	0	0	0	0	0	0	3456.41	1	1	48.5334	32.6129
DATA	813	10	48	0	0	A_64_P002989	NM_031604	7946.09	256.065	1.066560e+005	1.066560e+004	100691	35	1.289700e+001	0	0	0	0	0	0	100302	1	1	54.4085	37.2414
DATA	814	10	49	0	0	A_44_P914346	DV717012	7971.35	256.086	1.799269e+003	1.799541e+002	1718	34	1.130250e+001	0	0	0	0	0	0	1685.39	1	1	49.5074	36.8519
DATA	815	10	50	0	0	A_44_P791176	NM_001130577	7996.61	256.069	3.306240e+001	4.564004e+000	90.5	33	7.137309e+000	0	0	0	0	0	0	30.844	1	1	53.8203	33.2941
DATA	816	10	51	0	0	A_64_P011894	NM_001004210	8022.5	256	2.981918e+004	2.981919e+003	27066	31	6.864065e+000	0	0	0	0	0	0	27699.4	1	1	54.1152	31.6538
DATA	817	10	52	0	0	A_42_P717654	XM_001063683	8047.22	256.11	4.718243e+003	4.718350e+002	4270	34	7.488436e+000	0	0	0	0	0	0	4364.7	1	1	47.8731	33.08
DATA	818	10	53	0	0	A_64_P006102	NM_001100784	8072.69	255.986	3.473703e+002	3.488291e+001	363	34.5	6.590337e+000	0	0	0	0	0	0	319.925	1	1	47.2035	33.6071
DATA	819	10	54	0	0	A_64_P116038	NM_001000335	8098.51	255.884	1.362786e+001	3.479486e+000	73	29	7.083244e+000	0	0	0	0	0	0	12.4941	1	0	47.5395	29.1212
DATA	820	10	55	0	0	A_42_P581567	NM_001011899	8123.87	255.597	1.358967e+002	1.396508e+001	185	30	7.369722e+000	0	0	0	0	0	0	124.018	1	1	45.835	30.2069
DATA	821	10	56	0	0	A_42_P671206	FQ231880	8148.83	255.677	2.867261e+003	2.867443e+002	2664	28	7.611568e+000	0	0	0	0	0	0	2604.85	1	1	45.4864	29.3103
DATA	823	10	58	0	0	A_64_P078205	NM_001044255	8199.92	256.397	9.611235e+003	9.611290e+002	8331	33.5	1.092435e+001	0	0	0	0	0	0	8650.75	1	1	49.8279	35.1471
DATA	824	10	59	66	-1	(-)3xSLv1	NegativeControl	8225.42	256.427	3.288674e+000	3.276772e+000	54	30	8.321096e+000	0	0	0	0	0	0	-6.8724	0	0	57.5363	31.8235
DATA	825	10	60	0	0	A_44_P259051	NM_001037658	8251.07	256.309	5.780069e+002	5.789442e+001	567	32	7.052034e+000	0	0	0	0	0	0	515.198	1	1	50.1463	33.2581
DATA	826	10	61	0	0	A_64_P325262	A_64_P325262	8276.09	255.708	3.470636e+001	4.795584e+000	94	31	8.728202e+000	0	0	0	0	0	0	30.7813	1	1	45.835	31.7714
DATA	827	10	62	0	0	A_64_P140005	NM_001191804	8301.58	256.427	1.806269e+001	3.784178e+000	79.5	29	8.796853e+000	0	0	0	0	0	0	15.9436	1	1	57.5363	30.3333
DATA	828	10	63	0	0	A_42_P588606	NM_001134544	8326.58	255.894	2.846303e+002	2.865857e+001	308.5	29	7.624656e+000	0	0	0	0	0	0	249.976	1	1	45.4864	30.1538
DATA	829	10	64	0	0	A_42_P788541	NM_001106794	8352.06	255.825	6.948073e+003	6.948154e+002	6066.5	31.5	8.878606e+000	0	0	0	0	0	0	6071.42	1	1	45.4864	30.5938
DATA	830	10	65	0	0	A_44_P1050200	NM_001108000	8377.54	256.254	1.908355e+003	1.908653e+002	1720	32	7.898945e+000	0	0	0	0	0	0	1659.37	1	1	47.5395	32.68
DATA	831	10	66	0	0	A_42_P777935	ENSRNOT00000027369	8403.42	256.427	3.146325e+002	3.164566e+001	337	29	1.203010e+001	0	0	0	0	0	0	272.191	1	1	57.5363	31.84
DATA	832	10	67	0	0	A_44_P349475	NM_031333	8428.58	256.427	1.332817e+003	1.333253e+002	1177	32	6.858320e+000	0	0	0	0	0	0	1147.26	1	1	57.5363	30.3548
DATA	833	10	68	0	0	A_64_P136188	XM_001059617	8454	256.455	2.176959e+002	2.203772e+001	253.5	31	7.639668e+000	0	0	0	0	0	0	186.441	1	1	55.8519	30.6897
DATA	834	10	69	0	0	A_64_P023386	NM_001106232	8479.42	256.427	5.538598e+004	5.538599e+003	46860	31	7.343427e+000	0	0	0	0	0	0	47193.6	1	1	57.5363	32.1852
DATA	835	10	70	0	0	A_64_P048576	NM_001000163	8504.58	256.427	7.340031e+001	8.115514e+000	124	31	8.055610e+000	0	0	0	0	0	0	62.2301	1	1	57.5363	30.6786
DATA	836	10	71	1028	1	(+)E1A_r60_a20	E1A_r60_a20	8530.33	256.5	2.457902e+001	4.260266e+000	82	31	9.299227e+000	0	0	0	0	0	0	20.7323	1	1	57.5363	31.7714
DATA	837	10	72	0	0	A_64_P078510	XM_001053102	8555.5	256.5	6.243455e+002	6.253242e+001	582	28	6.313324e+000	0	0	0	0	0	0	524.009	1	1	57.5363	28.4839
DATA	838	10	73	0	0	A_64_P101533	A_64_P101533	8580.89	256.5	3.527542e+000	3.517617e+000	63	29	6.754688e+000	0	0	0	0	0	0	1.18045	0	0	56.9804	29.6774
DATA	839	10	74	0	0	A_64_P164601	ENSRNOT00000050537	8606.4	256.486	8.667992e+001	9.360151e+000	134	28	7.525178e+000	0	0	0	0	0	0	72.0229	1	1	48.2044	28.9643
DATA	840	10	75	0	0	A_42_P694928	NM_001109046	8631.43	256.467	4.155130e+002	4.170266e+001	397.5	29	6.874311e+000	0	0	0	0	0	0	343.566	1	1	49.5074	29.5517
DATA	841	10	76	0	0	A_42_P510565	ENSRNOT00000046259	8657.01	256.324	4.424079e+002	4.438440e+001	422	31.5	9.110361e+000	0	0	0	0	0	0	363.977	1	1	46.1809	32.5357
DATA	842	10	77	0	0	A_64_P050877	XM_001081816	8682.5	256.5	1.980708e+001	4.095746e+000	78	28	5.337893e+000	0	0	0	0	0	0	16.2169	1	1	57.5363	28.7
DATA	843	10	78	0	0	A_44_P281352	NM_001013076	8707.93	256.493	2.849368e+002	2.872049e+001	292	30	8.090117e+000	0	0	0	0	0	0	232.163	1	1	47.8731	30.25
DATA	844	10	79	0	0	A_44_P269675	ENSRNOT00000031839	8733.4	256.438	4.019985e+002	4.036248e+001	386.5	29	7.632589e+000	0	0	0	0	0	0	325.972	1	1	48.2044	29.5556
DATA	845	10	80	66	1	DarkCorner	DarkCorner	8758.58	256.573	3.649751e+000	3.636542e+000	56	31.5	6.492599e+000	0	0	0	0	0	0	-4.91787	0	0	65	30.9231
DATA	846	10	81	66	1	DarkCorner	DarkCorner	8784.11	256.5	3.666935e+000	3.653664e+000	54	29	7.769837e+000	0	0	0	0	0	0	-6.12395	0	0	56.9804	29
DATA	847	10	82	66	1	DarkCorner	DarkCorner	8809.5	256.5	3.683761e+000	3.670429e+000	60	28	6.273135e+000	0	0	0	0	0	0	-1.51971	0	0	57.5363	27.069
DATA	848	10	83	66	1	DarkCorner	DarkCorner	8834.67	256.5	3.700228e+000	3.686837e+000	55	29	1.060167e+001	0	0	0	0	0	0	-5.84855	0	0	57.5363	31.3929
DATA	849	10	84	66	1	DarkCorner	DarkCorner	8860.43	256.741	3.716559e+000	3.703109e+000	57	25.5	6.680972e+000	0	0	0	0	0	0	-0.65239	0	0	51.0895	27.6538
DATA	850	10	85	66	1	DarkCorner	DarkCorner	8885.67	256.264	3.733150e+000	3.737661e+000	64	28	7.700827e+000	0	0	0	0	0	0	2.89277	0	0	52.0157	28.4973
DATA	851	11	1	66	1	DarkCorner	DarkCorner	6739.38	262.781	3.526717e+000	3.241109e+000	65	27	7.442082e+000	0	0	0	0	0	0	3.21288	1	0	48.5334	27.6059
DATA	852	11	2	66	1	DarkCorner	DarkCorner	6765.21	262.833	3.210374e+000	3.198756e+000	61	32.5	1.111097e+001	0	0	0	0	0	0	-1.78719	0	0	49.8279	32.25
DATA	853	11	3	66	1	DarkCorner	DarkCorner	6790.32	262.423	3.189508e+000	3.177965e+000	58	32	6.818602e+000	0	0	0	0	0	0	-3.43864	0	0	50.1463	32.08
DATA	854	11	4	66	1	DarkCorner	DarkCorner	6816.23	262.203	3.169048e+000	3.157579e+000	59	29	6.538059e+000	0	0	0	0	0	0	-4.92599	0	0	48.5334	30.6061
DATA	855	11	5	66	1	DarkCorner	DarkCorner	6841.46	262.169	3.150150e+000	3.138749e+000	59	31	9.280249e+000	0	0	0	0	0	0	-4.05803	0	0	47.8731	32.6389
DATA	856	11	6	66	1	DarkCorner	DarkCorner	6866.8	262.783	3.131773e+000	3.120439e+000	58	31	6.783281e+000	0	0	0	0	0	0	-4.27129	0	0	46.1809	31.2903
DATA	857	11	7	0	0	A_64_P077381	A_64_P077381	6892.42	262.573	1.586478e+001	3.485738e+000	78	30.5	7.831560e+000	0	0	0	0	0	0	15.0028	1	1	57.5363	31
DATA	858	11	8	0	0	A_64_P085926	NM_030860	6917.46	262.746	1.698890e+003	1.699171e+002	1641	32.5	4.241393e+000	0	0	0	0	0	0	1614.67	1	1	47.5395	32.7143
DATA	859	11	9	0	0	A_42_P598560	NM_001033693	6943.03	262.853	1.650075e+003	1.650361e+002	1591.5	31	6.182055e+000	0	0	0	0	0	0	1575.78	1	1	47.5395	32.0303
DATA	860	11	10	0	1	ETG08_142674	ETG08_142674	6968.42	262.573	3.453382e+000	3.079675e+000	64	30	5.955045e+000	0	0	0	0	0	0	3.31221	1	0	57.5363	29.8529
DATA	861	11	11	0	0	A_42_P724142	NM_001106340	6993.63	263	1.819837e+003	1.820092e+002	1807	29	7.153318e+000	0	0	0	0	0	0	1752.75	1	1	48.5334	29.4783
DATA	862	11	12	0	0	A_64_P054193	NM_001014193	7019.42	262.573	4.268810e+004	4.268811e+003	40754	29.5	7.007057e+000	0	0	0	0	0	0	41268.3	1	1	57.5363	28.2667
DATA	863	11	13	0	0	A_42_P750554	NM_001107846	7044.51	262.64	1.480603e+003	1.480912e+002	1454	29	5.644171e+000	0	0	0	0	0	0	1436.32	1	1	49.8279	28.76
DATA	864	11	14	0	0	A_44_P285547	NM_053393	7070.08	262.712	1.389222e+002	1.421581e+001	196	32.5	7.913582e+000	0	0	0	0	0	0	135.204	1	1	48.2044	33.7353
DATA	865	11	15	0	0	A_42_P623374	NM_138845	7094.91	262.896	2.061566e+003	2.061785e+002	1988	32	7.104444e+000	0	0	0	0	0	0	2012.19	1	1	46.8651	31.1613
DATA	866	11	16	0	0	A_64_P064888	NM_001127303	7120.58	262.573	2.678631e+002	2.695372e+001	328	35.5	1.095870e+001	0	0	0	0	0	0	262.12	1	1	57.5363	37.1
DATA	867	11	17	0	0	A_44_P522406	NM_001001103	7146.3	263.143	4.200251e+001	5.156927e+000	104	29	6.516284e+000	0	0	0	0	0	0	41.2051	1	1	47.2035	30.125
DATA	868	11	18	0	0	A_42_P660129	NM_130422	7171.59	263.043	4.882189e+001	5.722877e+000	112.5	32	8.140716e+000	0	0	0	0	0	0	47.9922	1	1	47.8731	33.7333
DATA	869	11	19	0	0	A_64_P035679	A_64_P035679	7196.91	262.935	6.026896e+004	6.026897e+003	59191	30	8.001724e+000	0	0	0	0	0	0	59349.2	1	1	54.4085	32.2
DATA	870	11	20	0	0	A_64_P118862	NM_001191999	7222.5	263	7.073716e+001	7.674249e+000	131	33	5.937732e+000	0	0	0	0	0	0	69.7659	1	1	65	32.44
DATA	871	11	21	0	0	A_42_P638181	NM_133395	7247.63	262.873	8.828050e+003	8.828100e+002	8545	32	6.845099e+000	0	0	0	0	0	0	8717.51	1	1	47.5395	33.1538
DATA	872	11	22	0	0	A_44_P423803	NM_031144	7273	263	1.649634e+004	1.649637e+003	16257	30	7.929282e+000	0	0	0	0	0	0	16306.7	1	1	46.8651	32.6522
DATA	874	11	24	0	0	A_44_P445195	NM_133300	7323.93	262.988	1.733721e+003	1.733974e+002	1753.5	35	7.310914e+000	0	0	0	0	0	0	1715.99	1	1	51.0895	33.871
DATA	875	11	25	0	0	A_42_P563276	NM_013093	7349.24	263	1.806524e+002	1.830689e+001	240	33	8.569854e+000	0	0	0	0	0	0	178.855	1	1	47.2035	32.2632
DATA	876	11	26	0	0	A_42_P535608	NM_001107160	7375.06	263.056	1.591463e+002	1.618838e+001	220	33	5.940566e+000	0	0	0	0	0	0	157.572	1	1	46.8651	31.75
DATA	877	11	27	0	0	A_44_P233080	ENSRNOT00000026303	7400.3	263.1	7.159690e+003	7.159752e+002	7175.5	31.5	7.233701e+000	0	0	0	0	0	0	7087.58	1	1	47.2035	30.8667
DATA	878	11	28	0	0	A_43_P13320	NM_138880	7425.21	263.111	1.441969e+001	3.298124e+000	78	31	6.559290e+000	0	0	0	0	0	0	14.2688	1	0	45.4864	31.7692
DATA	879	11	29	0	0	A_42_P548007	NM_001135020	7450.8	262.784	1.377055e+004	1.377059e+003	13629	29	7.959575e+000	0	0	0	0	0	0	13616.8	1	1	47.8731	30.75
DATA	880	11	30	0	0	A_44_P282853	NM_031983	7476	263	2.961832e+003	2.961981e+002	2923	32.5	8.239086e+000	0	0	0	0	0	0	2926.45	1	1	46.8651	31.9444
DATA	881	11	31	0	0	A_42_P552341	NM_053519	7501.48	262.945	1.072472e+003	1.072884e+002	1126	29	6.091187e+000	0	0	0	0	0	0	1058.53	1	1	48.5334	29.7778
DATA	882	11	32	0	0	A_64_P031476	NM_001107172	7527.12	262.939	1.996960e+002	2.019037e+001	265.5	32	6.833649e+000	0	0	0	0	0	0	196.85	1	1	46.5243	32.2941
DATA	883	11	33	0	0	A_42_P620762	NM_024403	7552.44	263.027	2.197283e+004	2.197285e+003	21693	33	6.659416e+000	0	0	0	0	0	0	21628.7	1	1	48.5334	32.5652
DATA	884	11	34	0	0	A_64_P135370	A_64_P135370	7577.47	263.343	5.687793e+002	5.695628e+001	616	32	5.576087e+000	0	0	0	0	0	0	559.002	1	1	46.8651	31.5625
DATA	885	11	35	0	0	A_42_P576202	NM_001108583	7603.5	263	1.414176e+003	1.414492e+002	1415.5	28	6.725829e+000	0	0	0	0	0	0	1387.15	1	1	54.1152	29.0667
DATA	886	11	36	0	0	A_64_P022879	NM_001109019	7628.5	263	3.197437e+001	4.383306e+000	93	33	7.306372e+000	0	0	0	0	0	0	31.301	1	1	54.1152	33.1875
DATA	887	11	37	0	0	A_42_P711589	NM_022948	7653.78	263	9.864683e+003	9.864729e+002	9435	31	9.467204e+000	0	0	0	0	0	0	9635.85	1	1	46.1809	31.8065
DATA	888	11	38	0	0	A_64_P007244	A_64_P007244	7679.66	263.091	7.187505e+003	7.187568e+002	7012.5	29	6.436096e+000	0	0	0	0	0	0	7003.98	1	1	49.1849	30.56
DATA	889	11	39	0	0	A_42_P477625	NM_001108719	7704.57	263.1	5.090584e+003	5.090674e+002	4738	29	4.916513e+000	0	0	0	0	0	0	4948.28	1	1	47.5395	29.5417
DATA	890	11	40	0	0	A_64_P153091	XM_341223	7730.08	262.778	1.467498e+003	1.467810e+002	1454	30	8.555087e+000	0	0	0	0	0	0	1422.52	1	1	45.4864	32.3125
DATA	891	11	41	0	0	A_64_P016347	NM_130819	7755.5	263.352	8.276771e+000	3.147036e+000	70	28.5	7.563928e+000	0	0	0	0	0	0	8.00119	1	0	57.5363	29.3824
DATA	892	11	42	0	0	A_42_P495598	NM_001014026	7781	263.455	3.445226e+000	3.064780e+000	66.5	30	5.488165e+000	0	0	0	0	0	0	3.32055	1	0	55.8519	30.4063
DATA	893	11	43	0	0	A_42_P759043	NM_001134509	7806.5	263.352	7.706340e+002	7.712393e+001	787	32	4.656839e+000	0	0	0	0	0	0	740.382	1	1	57.5363	32.6154
DATA	894	11	44	0	0	A_64_P071595	XM_002728361	7831.58	263.427	6.602761e+000	3.135294e+000	69	29.5	7.909099e+000	0	0	0	0	0	0	6.32308	1	0	57.5363	32.0769
DATA	895	11	45	0	0	A_42_P780882	NM_001008511	7857	262.774	9.187510e+003	9.187562e+002	8758	34	8.007057e+000	0	0	0	0	0	0	8766.92	1	1	45.4864	34.4884
DATA	896	11	46	0	0	A_64_P044420	NM_001134983	7882.58	263.427	9.406193e+001	9.899661e+000	151	31.5	7.181767e+000	0	0	0	0	0	0	89.448	1	1	57.5363	32.7222
DATA	897	11	47	0	0	A_64_P000596	NM_001025732	7907.99	263.382	5.034192e+003	5.034287e+002	4661	33	7.299706e+000	0	0	0	0	0	0	4769.6	1	1	53.5237	31.7857
DATA	898	11	48	0	0	A_44_P468873	ENSRNOT00000015693	7933.42	263.427	2.448859e+001	3.958228e+000	84	31	1.206911e+001	0	0	0	0	0	0	23.1135	1	1	65	33.7778
DATA	900	11	50	0	0	A_42_P727022	NM_001107076	7983.74	263.222	1.628870e+004	1.628873e+003	15001.5	33	1.118640e+001	0	0	0	0	0	0	15252.9	1	1	47.5395	37.7241
DATA	901	11	51	0	0	A_64_P135604	NM_001009641	8009.56	263.494	3.596153e+003	3.596291e+002	3390	35	9.794356e+000	0	0	0	0	0	0	3353.58	1	1	52.3208	35.2
DATA	902	11	52	0	0	A_42_P813939	NM_001108741	8034.51	263.378	2.979372e+003	2.979540e+002	2750	29	7.304372e+000	0	0	0	0	0	0	2766.82	1	1	48.5334	31.0769
DATA	903	11	53	0	0	A_64_P052494	A_64_P052494	8060.42	263.427	6.331799e+000	3.237084e+000	69.5	29	8.131311e+000	0	0	0	0	0	0	5.8543	1	0	57.5363	31.7586
DATA	904	11	54	0	0	A_44_P323678	NM_001107651	8085.58	263.427	2.048986e+001	3.790053e+000	82	30.5	5.453360e+000	0	0	0	0	0	0	18.8621	1	1	65	31.5
DATA	905	11	55	0	0	A_44_P435764	NM_001191810	8111.33	263.5	9.830009e+000	3.350378e+000	72	30	7.601636e+000	0	0	0	0	0	0	9.00819	1	0	57.5363	29.5429
DATA	906	11	56	0	0	A_42_P688320	NM_001108569	8136.64	263.409	4.536391e+002	4.547787e+001	477	29	8.046503e+000	0	0	0	0	0	0	413.818	1	1	45.1352	28.6061
DATA	907	11	57	0	0	A_42_P798500	NM_001014023	8161.63	263.444	7.541424e+002	7.548347e+001	709.5	29	1.013797e+001	0	0	0	0	0	0	684.82	1	1	48.2044	31.1818
DATA	908	11	58	0	0	A_44_P279083	NM_133401	8187.42	263.427	6.243787e+002	6.252228e+001	633	31	7.735275e+000	0	0	0	0	0	0	564.283	1	1	57.5363	31.6
DATA	909	11	59	0	0	A_64_P129850	NM_001002855	8212.58	263.427	1.872497e+001	3.762185e+000	80.5	31	9.533181e+000	0	0	0	0	0	0	16.8431	1	1	65	32.8077
DATA	910	11	60	0	0	A_64_P029468	NM_001105784	8238.11	263.5	1.884908e+001	3.782035e+000	79	30	9.413229e+000	0	0	0	0	0	0	16.8732	1	1	65	33.1875
DATA	911	11	61	0	0	A_43_P18571	NM_001013965	8263.5	263.5	2.834861e+002	2.853944e+001	313.5	32	8.120191e+000	0	0	0	0	0	0	252.539	1	1	57.5363	33
DATA	912	11	62	0	1	ERCC-00104_60	ERCC-00104_60	8288.89	263.5	2.065139e+001	3.902274e+000	81	28	7.239945e+000	0	0	0	0	0	0	18.307	1	1	56.9804	28.7714
DATA	913	11	63	0	0	A_44_P653701	NM_001106536	8314.06	263.382	1.867622e+002	1.897031e+001	222.5	28	8.170947e+000	0	0	0	0	0	0	164.746	1	1	46.1809	28.8333
DATA	914	11	64	0	0	A_64_P093593	NM_001107077	8339.44	263.521	3.937152e+002	3.951326e+001	413.5	29	8.984096e+000	0	0	0	0	0	0	345.594	1	1	48.2044	30.2258
DATA	915	11	65	0	0	A_44_P1034793	NM_001008300	8364.96	263.653	1.028317e+003	1.028866e+002	942	32	9.810515e+000	0	0	0	0	0	0	898.138	1	1	48.5334	32.9394
DATA	916	11	66	0	0	A_42_P768355	NM_057130	8390.25	263.627	1.406870e+003	1.407275e+002	1270.5	27.5	7.525681e+000	0	0	0	0	0	0	1222.63	1	1	49.1849	28.125
DATA	917	11	67	0	0	A_44_P714581	NM_001107480	8415.5	263.735	5.482937e+003	5.483042e+002	4681	31	1.168938e+001	0	0	0	0	0	0	4741.24	1	1	46.5243	32.8077
DATA	918	11	68	0	0	A_64_P084521	NM_019351	8441	263.729	8.141416e+003	8.141487e+002	6899	32	6.190965e+000	0	0	0	0	0	0	7004.5	1	1	46.8651	31.5714
DATA	919	11	69	0	0	A_42_P562625	NM_131913	8466.74	263.58	2.295296e+003	2.295553e+002	2052	29	7.563983e+000	0	0	0	0	0	0	1964.6	1	1	46.8651	29.4231
DATA	920	11	70	0	0	A_42_P468662	NM_001108886	8492	263.545	1.730318e+003	1.730661e+002	1476	32.5	9.662218e+000	0	0	0	1	0	0	1473.59	1	1	55.8519	32.6071
DATA	921	11	71	0	0	A_42_P778587	NM_001135767	8517.19	263.412	4.468015e+002	4.481423e+001	430	29	8.081725e+000	0	0	0	0	0	0	378.596	1	1	46.5243	30.7429
DATA	922	11	72	0	0	A_64_P139957	NM_001008525	8542.92	263.507	2.845004e+004	2.845006e+003	23930.5	27.5	5.745369e+000	0	0	0	0	0	0	23985.1	1	1	45.835	27.75
DATA	923	11	73	0	0	A_44_P318402	NM_001000187	8568.1	263.882	1.125765e+002	1.178874e+001	158	28.5	9.254986e+000	0	0	0	0	0	0	94.4486	1	1	46.8651	32.1071
DATA	924	11	74	0	0	A_64_P090359	NM_001033565	8593.58	263.573	1.009446e+001	3.658397e+000	71	29	9.661144e+000	0	0	0	0	0	0	8.42595	1	0	57.5363	29.7813
DATA	925	11	75	0	0	A_43_P17778	NM_001134991	8619.15	263.538	2.605400e+001	4.390598e+000	84	31	5.813184e+000	0	0	0	0	0	0	21.639	1	1	50.1463	30.3103
DATA	926	11	76	0	0	A_64_P093176	A_64_P093176	8644.42	263.573	6.841273e+001	7.708110e+000	119	29	7.073312e+000	0	0	0	0	0	0	56.5427	1	1	57.5363	29.4286
DATA	927	11	77	0	0	A_64_P100123	NM_182821	8669.67	263.685	5.951808e+003	5.951915e+002	4798	29	7.309596e+000	0	0	0	0	0	0	4895.47	1	1	48.2044	30.7407
DATA	928	11	78	0	0	A_44_P426660	NM_001135717	8695.24	264.114	1.697889e+001	3.967156e+000	74	26	4.533195e+000	0	0	0	0	0	0	13.8994	1	0	46.5243	26.3704
DATA	929	11	79	0	0	A_42_P696084	NM_031022	8720.56	264.125	3.341369e+003	3.341563e+002	2821	30	8.595973e+000	0	0	0	1	0	0	2722.33	1	1	44.4243	29.8571
DATA	930	11	80	66	1	DarkCorner	DarkCorner	8746	263.545	3.633464e+000	3.620315e+000	54	31	6.871803e+000	0	0	0	0	0	0	-7.24027	0	0	55.8519	31.3103
DATA	931	11	81	66	1	DarkCorner	DarkCorner	8771.36	264	3.649906e+000	3.636697e+000	58	31.5	6.817733e+000	0	0	0	0	0	0	-4.13623	0	0	47.2035	31.5
DATA	932	11	82	66	1	DarkCorner	DarkCorner	8796.53	263.81	3.666777e+000	3.653507e+000	56	29	7.040348e+000	0	0	0	0	0	0	-4.87626	0	0	50.1463	29.931
DATA	933	11	83	66	1	DarkCorner	DarkCorner	8822.42	263.573	3.683976e+000	3.670644e+000	60	27.5	1.070251e+001	0	0	0	0	0	0	-1.37522	0	0	57.5363	29.8929
DATA	934	11	84	66	1	DarkCorner	DarkCorner	8847.56	264.3	3.699338e+000	3.685950e+000	52	28	6.760870e+000	0	0	0	0	0	0	-7.4747	0	0	49.5074	28.069
DATA	935	11	85	66	1	DarkCorner	DarkCorner	8872.98	263.637	4.621125e+000	3.731536e+000	64	26	8.544919e+000	0	0	0	0	0	0	3.66308	1	0	50.4627	28.8947
DATA	936	12	1	66	1	DarkCorner	DarkCorner	6752.33	269.787	3.215135e+000	3.203821e+000	63	25.5	8.724485e+000	0	0	0	0	0	0	0.415866	0	0	48.8603	27.2105
DATA	937	12	2	66	1	DarkCorner	DarkCorner	6777.85	270.11	3.192777e+000	3.181716e+000	62.5	33	6.803301e+000	0	0	0	0	0	0	0.517172	0	0	47.2035	33.1481
DATA	938	12	3	66	1	DarkCorner	DarkCorner	6802.99	269.909	3.172460e+000	3.160979e+000	58	31	9.816895e+000	0	0	0	0	0	0	-5.75119	0	0	47.8731	32.5
DATA	939	12	4	66	1	DarkCorner	DarkCorner	6828.25	269.789	3.153152e+000	3.141741e+000	62	29	7.391660e+000	0	0	0	0	0	0	-1.32231	0	0	47.2035	29.5946
DATA	940	12	5	66	1	DarkCorner	DarkCorner	6854.39	270.069	3.134047e+000	3.122705e+000	58	29	7.303130e+000	0	0	0	0	0	0	-3.68436	0	0	53.8203	29.5833
DATA	941	12	6	0	0	A_64_P118227	XM_002728056	6879.81	269.865	2.488596e+001	3.979801e+000	87	30	6.526316e+000	0	0	0	0	0	0	23.5189	1	1	47.8731	30.303
DATA	942	12	7	0	0	A_64_P051317	NM_130425	6904.91	270.065	1.838341e+002	1.864126e+001	234	31	5.699753e+000	0	0	0	0	0	0	174.635	1	1	54.4085	30.2222
DATA	943	12	8	0	0	A_42_P756350	NM_021772	6930.42	270.427	1.044805e+002	1.089100e+001	160	31	5.474077e+000	0	0	0	0	0	0	99.7464	1	1	65	31.5862
DATA	944	12	9	0	0	A_42_P816479	NM_022278	6955.48	270.147	1.870291e+004	1.870293e+003	17638.5	32.5	7.075618e+000	0	0	0	0	0	0	17934.2	1	1	49.8279	31.9333
DATA	945	12	10	0	0	A_64_P351634	NM_001029901	6981.09	270.386	3.330979e+002	3.344893e+001	384	28	6.615557e+000	0	0	0	0	0	0	320.79	1	1	57.259	29.1471
DATA	946	12	11	0	0	A_64_P136597	A_64_P136597	7006.24	270.113	7.787852e+002	7.793769e+001	817	30.5	8.326807e+000	0	0	0	0	0	0	752.873	1	1	47.2035	30.4167
DATA	947	12	12	0	0	A_64_P052017	ENSRNOT00000033592	7031.91	270.386	2.718185e+001	4.066754e+000	86	32	8.404637e+000	0	0	0	0	0	0	26.3754	1	1	57.259	31.069
DATA	948	12	13	0	0	A_44_P444485	TC589779	7057.08	269.901	2.504838e+003	2.505019e+002	2398	32	7.790535e+000	0	0	0	0	0	0	2438.24	1	1	46.8651	33.8857
DATA	949	12	14	0	0	A_44_P147373	XM_226249	7082.48	270.147	2.436942e+003	2.437127e+002	2363	36	1.046637e+001	0	0	0	0	0	0	2379.49	1	1	49.8279	36.7143
DATA	950	12	15	0	0	A_64_P059939	NM_001134540	7108	270.455	4.357979e+004	4.357980e+003	42233	34	7.938524e+000	0	0	0	0	0	0	42672.9	1	1	55.8519	34.4571
DATA	951	12	16	0	0	A_42_P637279	NM_012743	7133.21	270	2.012206e+001	3.604485e+000	80	36	1.232534e+001	0	0	0	0	0	0	19.7494	1	1	46.1809	38.2258
DATA	952	12	17	0	0	A_42_P771570	XM_001080365	7158.56	270.266	6.444392e+002	6.451296e+001	695	29	6.607688e+000	0	0	0	0	0	0	633.924	1	1	50.7771	29.6923
DATA	953	12	18	0	0	A_43_P12942	NM_053817	7184.16	270.333	9.382187e+003	9.382234e+002	9119	30	6.932061e+000	0	0	0	0	0	0	9247.05	1	1	49.5074	30.6471
DATA	954	12	19	0	0	A_64_P053307	NM_001191900	7209.58	270.427	1.768866e+001	3.459497e+000	80	30	6.949147e+000	0	0	0	0	0	0	17.463	1	1	57.5363	29.1724
DATA	955	12	20	0	0	A_42_P595630	NM_001013189	7234.54	270.386	6.662164e+003	6.662230e+002	6536.5	30	5.896544e+000	0	0	0	0	0	0	6586.06	1	1	47.5395	30.3333
DATA	956	12	21	0	0	A_64_P154760	A_64_P154760	7260.44	269.71	5.370389e+002	5.378574e+001	589.5	32	7.292427e+000	0	0	0	0	0	0	531.433	1	1	46.8651	34.2222
DATA	957	12	22	0	0	A_42_P764359	NM_145086	7285.48	270.147	1.282184e+003	1.282526e+002	1291	29	6.761902e+000	0	0	0	0	0	0	1270.02	1	1	49.8279	30.7826
DATA	958	12	23	0	0	A_43_P10405	NM_001109257	7311.42	270.427	4.570100e+001	5.445579e+000	110	29	7.280500e+000	0	0	0	0	0	0	45.2995	1	1	57.5363	30.5455
DATA	959	12	24	0	0	A_44_P269950	ENSRNOT00000014054	7336.58	270.427	4.566285e+001	5.441762e+000	108.5	33	8.667324e+000	0	0	0	0	0	0	45.279	1	1	57.5363	32.2593
DATA	960	12	25	0	0	A_44_P160763	NM_001106513	7362	270.455	2.119823e+002	2.140383e+001	275	31	7.529413e+000	0	0	0	0	0	0	210.233	1	1	55.8519	30.7778
DATA	961	12	26	0	0	A_64_P127678	NM_001008553	7387.31	270.338	1.239465e+003	1.239818e+002	1266	32	8.323143e+000	0	0	0	0	0	0	1229.11	1	1	48.5334	31.6333
DATA	962	12	27	0	0	A_42_P684885	NM_133517	7412.67	270.5	6.010385e+000	3.021073e+000	67.5	29	8.149184e+000	0	0	0	0	0	0	5.95856	1	0	57.5363	31.2667
DATA	963	12	28	0	0	A_64_P102708	NM_001034149	7438.33	270.5	1.008341e+001	3.129175e+000	70	32	6.780030e+000	0	0	0	0	0	0	9.99114	1	0	57.5363	32.9706
DATA	964	12	29	0	0	A_42_P547629	NM_001106718	7463.2	270.169	6.861933e+002	6.868334e+001	734.5	32.5	7.465636e+000	0	0	0	0	0	0	679.371	1	1	47.5395	31.9167
DATA	965	12	30	0	0	A_42_P522285	NM_001044263	7488.54	270.176	5.125227e+002	5.133810e+001	564	28	6.258586e+000	0	0	0	0	0	0	506.947	1	1	48.8603	29.6452
DATA	966	12	31	0	0	A_64_P164423	NM_057193	7514.5	270.5	3.125280e+001	4.311920e+000	94.5	30.5	7.198894e+000	0	0	0	0	0	0	30.8784	1	1	57.5363	31.25
DATA	967	12	32	0	0	A_44_P256143	NM_001047917	7539.67	270.5	1.724177e+002	1.749651e+001	232.5	33	7.541715e+000	0	0	0	0	0	0	170.123	1	1	57.5363	33.8261
DATA	968	12	33	0	0	A_44_P727294	NM_001160314	7564.63	270.64	2.506451e+003	2.506629e+002	2525.5	33	6.526285e+000	0	0	0	0	0	0	2469.4	1	1	48.8603	32.375
DATA	969	12	34	0	0	A_64_P108404	NM_001000092	7590.5	270.5	8.669166e+001	9.168539e+000	149	31	7.662442e+000	0	0	0	0	0	0	85.2562	1	1	57.5363	31.8824
DATA	970	12	35	0	0	A_44_P520829	NM_001108777	7615.27	270.425	8.201727e+002	8.207177e+001	835	30	8.163960e+000	0	0	0	0	0	0	805.065	1	1	48.5334	32.3103
DATA	971	12	36	0	0	A_44_P229677	NM_001014221	7640.94	270.768	2.114056e+003	2.114268e+002	2130	33	7.070117e+000	0	0	0	0	0	0	2070.86	1	1	46.5243	32.8857
DATA	972	12	37	0	0	A_64_P126215	A_64_P126215	7666.58	270.573	1.026288e+001	3.173915e+000	71	29	6.892750e+000	0	0	0	0	0	0	10.0296	1	0	57.5363	30.48
DATA	973	12	38	0	0	A_64_P090035	A_64_P090035	7691.81	270.519	1.880447e+003	1.880688e+002	1842.5	29	4.857020e+000	0	0	0	0	0	0	1833.22	1	1	49.8279	30.4211
DATA	974	12	39	0	0	A_64_P089330	ENSRNOT00000012374	7717.63	270.556	1.904598e+002	1.928373e+001	250	29	5.629254e+000	0	0	0	0	0	0	185.186	1	1	48.2044	30.3667
DATA	975	12	40	0	0	A_44_P454429	NM_012712	7742.84	270.629	1.408335e+002	1.440499e+001	202	29	9.629372e+000	0	0	0	0	0	0	136.559	1	1	44.0646	30.7188
DATA	976	12	41	0	1	ERCC-00144_60	ERCC-00144_60	7768.21	270.403	9.815766e+000	3.190767e+000	70.5	28	6.289915e+000	0	0	0	0	0	0	9.48961	1	0	47.8731	28.7143
DATA	977	12	42	0	0	A_42_P759843	XR_086347	7793.44	270.611	5.897198e+003	5.897277e+002	5620.5	30	6.196402e+000	0	0	0	0	0	0	5684.12	1	1	48.2044	30.5333
DATA	978	12	43	0	0	A_43_P14264	NM_053653	7819.11	270.5	7.069838e+002	7.076436e+001	746	32	5.466648e+000	0	0	0	0	0	0	679.211	1	1	56.9804	31.7931
DATA	979	12	44	0	0	A_64_P011223	NM_024353	7843.94	270.62	4.287975e+002	4.298916e+001	482.5	30.5	6.291011e+000	0	0	0	0	0	0	410.615	1	1	40.2912	31.1316
DATA	980	12	45	0	0	A_42_P701169	NM_001109572	7869.89	270.5	1.970950e+003	1.971190e+002	1933	32	7.088995e+000	0	0	0	0	0	0	1880.62	1	1	56.9804	33.55
DATA	981	12	46	0	0	A_64_P143307	NM_001014106	7895.42	270.573	3.044647e+002	3.060259e+001	351	30	7.495298e+000	0	0	0	0	0	0	289.462	1	1	57.5363	31.2222
DATA	982	12	47	0	0	A_44_P480636	NM_001005381	7920.06	270.609	3.108730e+002	3.124133e+001	349	31	7.683975e+000	0	0	0	0	0	0	294.488	1	1	46.5243	31.5
DATA	983	12	48	0	0	A_64_P163564	ENSRNOT00000010609	7946	270.545	6.491930e+001	7.198726e+000	126	32	8.106301e+000	0	0	0	0	0	0	61.2555	1	1	55.8519	31.5
DATA	984	12	49	0	0	A_42_P774028	NM_001017447	7970.88	270.616	3.828713e+003	3.828841e+002	3542	32	9.539730e+000	0	0	0	0	0	0	3598.71	1	1	48.5334	32.8387
DATA	985	12	50	0	0	A_43_P20110	ENSRNOT00000050558	7996.58	270.573	3.278667e+001	4.536735e+000	92	35	9.111983e+000	0	0	0	0	0	0	30.6902	1	1	57.5363	35.4375
DATA	986	12	51	0	0	A_44_P552865	NM_001170399	8022.04	270.636	6.040349e+002	6.048551e+001	626	36	1.270080e+001	0	0	0	0	0	0	563.064	1	1	49.1849	38
DATA	987	12	52	0	0	A_43_P17428	NM_001012189	8047.39	270.638	3.427142e+002	3.441699e+001	379	29	1.009853e+001	0	0	0	0	0	0	318.113	1	1	47.5395	32.8621
DATA	988	12	53	0	0	A_64_P146222	TC633165	8072.93	270.493	2.358093e+004	2.358096e+003	21648	32.5	7.461857e+000	0	0	0	0	0	0	21791.9	1	1	48.5334	32.1
DATA	989	12	54	0	0	A_64_P054856	NM_001135894	8098.07	270.507	7.437152e+002	7.443991e+001	739	31	6.729509e+000	0	0	0	0	0	0	684.286	1	1	48.5334	30.4375
DATA	990	12	55	0	0	A_64_P154982	ENSRNOT00000018118	8123.59	270.851	1.680055e+004	1.680058e+003	15128	29	6.915327e+000	0	0	0	0	0	0	15389.4	1	1	48.5334	29.2353
DATA	991	12	56	0	0	A_42_P726363	NM_031536	8149.39	270.931	2.351086e+001	3.986330e+000	84.5	28	9.264371e+000	0	0	0	0	0	0	21.4364	1	1	53.8203	29.6667
DATA	992	12	57	0	0	A_64_P139685	A_64_P139685	8174.5	271	1.626345e+001	3.619894e+000	79	30	7.182798e+000	0	0	0	0	0	0	14.7607	1	1	65	31.5
DATA	993	12	58	0	0	A_64_P114104	NM_001034136	8199.95	270.907	8.834942e+003	8.835002e+002	7872	30	8.644844e+000	0	0	0	0	0	0	7980.61	1	1	46.8651	32
DATA	994	12	59	0	0	A_42_P480273	A_42_P480273	8225.38	271	8.427177e+003	8.427240e+002	7475	30.5	8.055672e+000	0	0	0	0	0	0	7576.18	1	1	48.5334	32.4231
DATA	995	12	60	0	0	A_64_P004344	ENSRNOT00000047696	8250.7	270.9	1.516174e+004	1.516177e+003	13634.5	31	7.416663e+000	0	0	0	0	0	0	13565	1	1	47.2035	32.4
DATA	996	12	61	0	0	A_42_P723584	NM_001109099	8275.93	270.786	5.156167e+003	5.156272e+002	4502.5	31	8.016055e+000	0	0	0	1	0	0	4590.76	1	1	46.8651	30.8333
DATA	997	12	62	0	0	A_64_P114813	A_64_P114813	8301.61	270.527	9.042837e+000	3.434451e+000	68	29.5	7.475091e+000	0	0	0	0	0	0	8.01086	1	0	47.5395	30.1071
DATA	998	12	63	0	0	A_64_P034551	NM_053818	8326.93	270.806	1.208987e+002	1.253993e+001	162	33	9.229220e+000	0	0	0	0	0	0	106.583	1	1	46.8651	32.6129
DATA	999	12	64	0	0	A_42_P492976	NM_001126099	8352.24	271	3.421406e+002	3.437726e+001	343	32	9.831966e+000	0	0	0	0	0	0	300.152	1	1	46.8651	31.6176
DATA	1000	12	65	0	0	A_64_P141799	NM_001025709	8377.53	270.88	1.105444e+003	1.105955e+002	1000.5	32	6.989754e+000	0	0	0	0	0	0	964.939	1	1	48.8603	31.76
DATA	1001	12	66	0	0	A_44_P337088	NM_133609	8402.79	270.806	8.493631e+002	8.500351e+001	773	31	9.608460e+000	0	0	0	0	0	0	737.706	1	1	47.5395	30.3182
DATA	1002	12	67	0	0	A_64_P137961	A_64_P137961	8428.43	271.103	9.724142e+001	1.030019e+001	147	29.5	9.175429e+000	0	0	0	0	0	0	84.0376	1	1	46.5243	29.8667
DATA	1003	12	68	0	0	A_64_P053822	ENSRNOT00000028268	8454	271	9.467461e+001	1.006409e+001	143	30.5	6.824842e+000	0	0	0	0	0	0	81.4037	1	1	54.9904	30.4615
DATA	1004	12	69	0	0	A_42_P484456	NM_001106601	8479.29	270.754	4.688032e+003	4.688157e+002	4028	31	8.657293e+000	0	0	0	1	0	0	4010.48	1	1	45.1352	30.7778
DATA	1005	12	70	0	0	A_44_P508632	NM_001107594	8504.7	270.657	1.073160e+001	3.611555e+000	69	31.5	6.941514e+000	0	0	0	0	0	0	9.13427	1	0	47.2035	30.7692
DATA	1006	12	71	0	0	A_64_P080598	NM_001047865	8530.49	271.042	3.958509e+001	5.261244e+000	96	26	6.775632e+000	0	0	0	0	0	0	33.5254	1	1	48.2044	28.4333
DATA	1007	12	72	0	0	A_64_P144243	A_64_P144243	8555.46	270.917	2.111940e+001	4.073171e+000	80	29	9.829575e+000	0	0	0	0	0	0	17.7981	1	1	48.2044	31.4348
DATA	1008	12	73	0	0	A_44_P479917	NM_030864	8580.67	271.043	1.864067e+001	3.965456e+000	78	29.5	8.782428e+000	0	0	0	0	0	0	15.6323	1	1	46.8651	30.8
DATA	1009	12	74	0	0	A_44_P974524	NM_001025764	8606.35	270.913	4.535123e+001	5.739483e+000	99.5	30	7.304092e+000	0	0	0	0	0	0	37.8407	1	1	46.5243	28.7241
DATA	1010	12	75	0	0	A_42_P522899	NM_021578	8631.5	271	1.108348e+002	1.163351e+001	152	31.5	8.042546e+000	0	0	0	0	0	0	92.0324	1	1	65	32.3571
DATA	1011	12	76	0	0	A_64_P069892	NM_019201	8657.09	271.065	3.953429e+004	3.953431e+003	31907	30	7.714086e+000	0	0	0	0	0	0	32667	1	1	54.4085	29.7407
DATA	1012	12	77	0	0	A_44_P415199	NM_001108748	8682.51	270.633	1.927422e+001	4.056965e+000	76	28	5.285685e+000	0	0	0	0	0	0	15.8473	1	1	40.6843	28.4615
DATA	1013	12	78	0	0	A_64_P034610	NM_022622	8707.63	271.404	1.860239e+002	1.894488e+001	215.5	27	7.555351e+000	0	0	0	0	0	0	152.261	1	1	57.8122	27.4
DATA	1014	12	79	0	0	A_42_P473828	ENSRNOT00000035309	8733.34	271.132	3.605504e+003	3.605684e+002	2897	30.5	6.649465e+000	0	0	0	1	0	0	2936.77	1	1	49.8279	30.1538
DATA	1015	12	80	66	1	DarkCorner	DarkCorner	8758.46	271.355	3.633112e+000	3.619964e+000	53	31	6.506344e+000	0	0	0	0	0	0	-8.33386	0	0	49.8279	30.7586
DATA	1016	12	81	66	1	DarkCorner	DarkCorner	8784.01	271.521	3.649799e+000	3.636590e+000	58	28	7.178752e+000	0	0	0	0	0	0	-3.87566	0	0	48.5334	27.9655
DATA	1017	12	82	66	1	DarkCorner	DarkCorner	8809.5	271.352	3.666628e+000	3.653358e+000	59	27.5	8.520134e+000	0	0	0	0	0	0	-2.74986	0	0	57.5363	28.2059
DATA	1018	12	83	66	1	DarkCorner	DarkCorner	8834.95	271.221	3.683180e+000	3.669850e+000	57.5	27	9.699519e+000	0	0	0	0	0	0	-3.17659	0	0	49.1849	28.9143
DATA	1019	12	84	66	1	DarkCorner	DarkCorner	8860.13	271.946	3.698323e+000	3.684939e+000	58.5	26	7.116611e+000	0	0	0	0	0	0	-0.954131	0	0	53.5237	28.3846
DATA	1020	12	85	66	1	DarkCorner	DarkCorner	8885.62	271.149	4.200764e+000	3.725505e+000	64	29	7.611125e+000	0	0	0	0	0	0	3.33083	1	0	48.5334	29.0757
DATA	1021	13	1	66	1	DarkCorner	DarkCorner	6739.6	277.301	3.219487e+000	3.215759e+000	64	27	7.229254e+000	0	0	0	0	0	0	2.06421	0	0	51.0895	27.3534
DATA	1022	13	2	66	1	DarkCorner	DarkCorner	6765.38	277.342	3.196693e+000	3.185124e+000	60.5	32	6.800735e+000	0	0	0	0	0	0	-2.29442	0	0	50.7771	30.8
DATA	1023	13	3	66	1	DarkCorner	DarkCorner	6790.49	276.932	3.176143e+000	3.164648e+000	61	31	5.106501e+000	0	0	0	0	0	0	-1.26101	0	0	48.5334	29.8276
DATA	1024	13	4	66	1	DarkCorner	DarkCorner	6815.82	277.211	3.155990e+000	3.144569e+000	56	30	8.582891e+000	0	0	0	0	0	0	-5.22921	0	0	47.5395	31.025
DATA	1025	13	5	66	1	DarkCorner	DarkCorner	6841.42	277.427	3.136886e+000	3.125533e+000	56	31	7.328332e+000	0	0	0	0	0	0	-7.04213	0	0	65	29.9231
DATA	1026	13	6	0	0	A_64_P029912	NM_001109143	6866.88	277.236	2.984024e+002	3.000167e+001	337.5	30.5	6.690038e+000	0	0	0	0	0	0	281.797	1	1	47.8731	30.3571
DATA	1027	13	7	0	0	A_42_P574731	NM_012948	6891.93	277.282	5.948395e+003	5.948475e+002	5530	28.5	4.973031e+000	0	0	0	0	0	0	5646.94	1	1	47.2035	28.6
DATA	1028	13	8	0	0	A_44_P137448	NM_017043	6917.46	277.296	6.859518e+002	6.866413e+001	703.5	31	6.815307e+000	0	0	0	1	0	0	654.462	1	1	47.8731	32.3214
DATA	1029	13	9	0	0	A_42_P770614	NM_001013235	6943	277.455	4.971007e+004	4.971008e+003	47141	35	7.464555e+000	0	0	0	0	0	0	47653	1	1	55.8519	33.6429
DATA	1030	13	10	0	0	A_42_P785419	NM_199501	6968.18	277.282	2.791968e+002	2.808565e+001	321.5	29.5	6.158700e+000	0	0	0	0	0	0	268.789	1	1	49.5074	30.4474
DATA	1031	13	11	0	0	A_42_P581043	TC622715	6993.5	277.568	1.253705e+004	1.253709e+003	11869	29	7.423734e+000	0	0	0	0	0	0	12119.4	1	1	49.1849	29.3871
DATA	1032	13	12	0	0	A_64_P098532	NM_001029928	7019.33	277.5	2.520430e+001	3.937278e+000	88	30.5	8.639685e+000	0	0	0	0	0	0	24.4571	1	1	57.5363	30.4688
DATA	1033	13	13	0	0	A_64_P090758	A_64_P090758	7044.45	277.366	1.403763e+003	1.404086e+002	1432.5	32	7.470386e+000	0	0	0	0	0	0	1366.75	1	1	51.4001	31.84
DATA	1034	13	14	0	0	A_43_P12079	NM_021583	7070	277.455	9.378598e+001	9.848267e+000	156	30.5	1.590826e+001	0	0	0	0	0	0	91.6048	1	1	55.8519	37.0357
DATA	1035	13	15	0	0	A_64_P001947	A_64_P001947	7095.5	277.5	2.367086e+001	3.818564e+000	86.5	34	7.754422e+000	0	0	0	0	0	0	23.1871	1	1	65	32.8519
DATA	1036	13	16	0	0	A_64_P064461	A_64_P064461	7120.67	277.5	5.434772e+001	6.202363e+000	114.5	33	9.456948e+000	0	0	0	0	0	0	53.3733	1	1	65	34.7857
DATA	1037	13	17	0	0	A_42_P575398	NM_020538	7146.18	277.527	2.992648e+000	2.982772e+000	63	30.5	8.430074e+000	0	0	0	0	0	0	0.742814	0	0	49.1849	31.8846
DATA	1038	13	18	0	0	A_42_P482623	NM_199463	7171.44	277.534	2.557651e+003	2.557824e+002	2541.5	29	7.584472e+000	0	0	0	0	0	0	2522.71	1	1	49.1849	29.2963
DATA	1039	13	19	0	0	A_42_P738431	NM_019175	7196.53	277.579	3.401231e+003	3.401361e+002	3324	30	6.519783e+000	0	0	0	0	0	0	3360.65	1	1	49.8279	30.5152
DATA	1040	13	20	0	0	A_44_P1027780	ENSRNOT00000065815	7222.42	277.573	3.225120e+001	4.381655e+000	97	28.5	7.976487e+000	0	0	0	0	0	0	31.9152	1	1	57.5363	28.9286
DATA	1041	13	21	0	0	A_42_P479802	NM_053679	7247.56	277.494	2.521397e+003	2.521572e+002	2491.5	30	8.203283e+000	0	0	0	1	0	0	2498.15	1	1	52.3208	32.5769
DATA	1042	13	22	0	0	A_44_P496624	NM_022302	7273.09	277.324	1.073276e+002	1.113336e+001	166	30	7.335553e+000	0	0	0	0	0	0	106.44	1	1	48.8603	32.1034
DATA	1043	13	23	0	0	A_42_P700753	FQ212883	7298.31	277.521	2.649868e+003	2.650033e+002	2658	29.5	6.900210e+000	0	0	0	0	0	0	2629.99	1	1	48.5334	31.25
DATA	1044	13	24	0	0	A_44_P229299	NM_001100678	7324	277.5	5.737783e+002	5.745392e+001	635.5	31.5	8.083051e+000	0	0	0	0	0	0	569.758	1	1	48.5334	32.4167
DATA	1045	13	25	0	0	A_42_P728472	NM_001007600	7349.05	277.608	9.205510e+003	9.205557e+002	9012.5	33	8.408679e+000	0	0	0	0	0	0	9143.57	1	1	49.1849	32
DATA	1046	13	26	0	0	A_42_P488904	NM_001108947	7374.38	277.556	1.651432e+004	1.651435e+003	15942	33	7.593770e+000	0	0	0	0	0	0	16403.5	1	1	48.2044	32.0357
DATA	1047	13	27	0	0	A_42_P458494	NM_001034951	7400.11	277.5	1.173873e+002	1.210511e+001	179	30	7.482165e+000	0	0	0	0	0	0	116.574	1	1	56.9804	32.871
DATA	1048	13	28	0	0	A_64_P100331	ENSRNOT00000048614	7425.32	277.853	2.249908e+001	3.715343e+000	84.5	31	7.236927e+000	0	0	0	0	0	0	22.3356	1	1	45.835	31.4571
DATA	1049	13	29	0	0	A_64_P113989	NM_181631	7450.5	277.5	1.918921e+004	1.918923e+003	18831	34	7.261184e+000	0	0	0	0	0	0	19036.3	1	1	49.1849	34.2813
DATA	1050	13	30	0	0	A_64_P042105	ENSRNOT00000061599	7476.42	277.573	5.775849e+001	6.490724e+000	117	29.5	5.792097e+000	0	0	0	0	0	0	57.2492	1	1	57.5363	30
DATA	1051	13	31	0	0	A_64_P044435	NM_001015020	7501.58	277.573	7.279669e+002	7.285703e+001	792	29.5	7.022262e+000	0	0	0	0	0	0	720.791	1	1	65	30.8571
DATA	1052	13	32	0	0	A_64_P149011	NM_031352	7526.74	277.736	5.890799e+003	5.890874e+002	5763	31	7.771226e+000	0	0	0	0	0	0	5825.66	1	1	47.5395	31.4333
DATA	1053	13	33	0	0	A_42_P580844	NM_019296	7552.35	277.74	3.707853e+002	3.719747e+001	420	33	8.980035e+000	0	0	0	0	0	0	366.147	1	1	49.8279	34.8889
DATA	1054	13	34	0	0	A_64_P052972	A_64_P052972	7577.77	278.065	2.156977e+002	2.177424e+001	274	34	1.117495e+001	0	0	0	0	0	0	212.663	1	1	45.1352	35.7097
DATA	1055	13	35	0	0	A_44_P454300	NM_001003979	7603.42	277.573	2.993718e+000	2.982883e+000	61	30.5	7.811105e+000	0	0	0	0	0	0	-0.733101	0	0	57.5363	32.3235
DATA	1056	13	36	0	0	A_44_P149743	ENSRNOT00000005476	7628.1	277.877	1.444460e+001	3.319313e+000	78.5	32.5	6.856890e+000	0	0	0	0	0	0	14.1866	1	0	46.8651	32.7941
DATA	1057	13	37	0	0	A_42_P841017	NM_173309	7653.5	277.5	6.439274e+003	6.439344e+002	6042	33	6.344755e+000	0	0	0	0	0	0	6309.89	1	1	49.1849	32.5484
DATA	1058	13	38	0	0	A_44_P206844	NM_013074	7679.73	277.658	1.510044e+002	1.539606e+001	213	32	6.842760e+000	0	0	0	0	0	0	147.614	1	1	48.2044	32.1481
DATA	1059	13	39	0	0	A_64_P073400	NM_001000705	7704.45	277.455	1.673044e+002	1.699906e+001	225	29	6.027604e+000	0	0	0	0	0	0	163.139	1	1	46.5243	30.1739
DATA	1060	13	40	0	0	A_64_P066676	A_64_P066676	7730.73	277.6	2.528113e+001	3.937264e+000	86.5	29	7.545443e+000	0	0	0	0	0	0	24.5839	1	1	46.5243	29.0606
DATA	1061	13	41	0	0	A_44_P386965	NM_001134594	7755.13	277.958	8.899998e+000	3.154572e+000	71	28.5	7.370112e+000	0	0	0	0	0	0	8.6316	1	0	46.8651	28.5625
DATA	1062	13	42	0	0	A_64_P095895	NM_019338	7781	278	7.563065e+001	8.149544e+000	134	30	6.589253e+000	0	0	0	0	0	0	73.1271	1	1	54.9904	30.3056
DATA	1063	13	43	1028	1	(+)E1A_r60_a22	E1A_r60_a22	7806.09	277.79	1.463188e+002	1.494541e+001	202	34	6.438293e+000	0	0	0	0	0	0	141.031	1	1	49.5074	32.5806
DATA	1064	13	44	0	0	A_42_P541625	NM_001126090	7831.71	277.917	3.076797e+004	3.076798e+003	29034	32	6.823583e+000	0	0	0	0	0	0	29558.9	1	1	50.1463	33.8065
DATA	1065	13	45	0	0	A_64_P033895	NM_001126084	7857.14	277.789	3.929559e+002	3.941500e+001	443	32	7.772365e+000	0	0	0	0	0	0	376.216	1	1	47.2035	33.3478
DATA	1066	13	46	0	0	A_64_P012546	NM_022300	7882.5	278	9.193842e+004	9.193843e+003	87962.5	31	8.358501e+000	0	0	0	0	0	0	87715.1	1	1	54.1152	32.6897
DATA	1067	13	47	0	0	A_42_P495598	NM_001014026	7908	278	3.099031e+000	3.087816e+000	63	31	7.360170e+000	0	0	0	0	0	0	-1.19979	0	0	65	31.4583
DATA	1068	13	48	0	0	A_42_P483463	NM_001130999	7933	278	6.640617e+003	6.640689e+002	6217	31	7.193187e+000	0	0	0	0	0	0	6288.84	1	1	46.8651	30.5
DATA	1069	13	49	0	0	A_42_P575104	NM_153737	7958.5	278	2.638492e+002	2.656775e+001	302	31	6.988414e+000	0	0	0	0	0	0	248.897	1	1	48.5334	31.7
DATA	1070	13	50	0	0	A_42_P461726	NM_133549	7984.5	278	3.707281e+001	4.848186e+000	96.5	32.5	1.076039e+001	0	0	0	0	0	0	34.8289	1	1	54.1152	34.1765
DATA	1071	13	51	0	0	A_64_P098688	A_64_P098688	8009.5	278	1.029637e+005	1.029637e+004	96334.5	36	1.005389e+001	0	0	0	0	0	0	96341.4	1	1	54.1152	37.5143
DATA	1072	13	52	0	0	A_64_P105797	A_64_P105797	8035	278	3.709297e+001	4.866464e+000	97	29	1.032004e+001	0	0	0	0	0	0	34.5611	1	1	54.9904	33.6452
DATA	1073	13	53	0	0	A_42_P545943	NM_019291	8060	277.797	8.001523e+003	8.001585e+002	7256	29	8.266290e+000	0	0	0	0	0	0	7423.58	1	1	46.8651	30.8235
DATA	1074	13	54	0	0	A_44_P520045	NM_001001371	8085.7	277.857	1.546306e+002	1.578619e+001	204.5	31.5	7.075930e+000	0	0	0	0	0	0	142.829	1	1	47.2035	31.0714
DATA	1075	13	55	0	0	A_44_P306964	NM_001012184	8111.39	278.069	5.293551e+001	6.181404e+000	110	30.5	7.370112e+000	0	0	0	0	0	0	48.6779	1	1	53.8203	30.0625
DATA	1076	13	56	0	0	A_44_P156043	NM_001039012	8136	278	2.502987e+003	2.503192e+002	2341	28	7.505053e+000	0	0	0	0	0	0	2291.54	1	1	46.8651	27.2973
DATA	1077	13	57	0	0	A_64_P054686	TC585752	8162.07	278.17	2.919070e+004	2.919072e+003	26311	31.5	1.017683e+001	0	0	0	0	0	0	26599.9	1	1	51.7088	32.4667
DATA	1078	13	58	0	0	A_42_P575104	NM_153737	8187.5	278	2.485778e+002	2.506756e+001	279	30	7.761917e+000	0	0	0	0	0	0	225.449	1	1	54.1152	29.8929
DATA	1079	13	59	0	0	A_64_P142194	NM_053426	8212.63	278.127	1.663764e+003	1.664081e+002	1562	27	6.410928e+000	0	0	0	0	0	0	1501.97	1	1	47.5395	28
DATA	1080	13	60	0	0	A_64_P043314	A_64_P043314	8238.09	278.065	8.517467e+001	9.122530e+000	135	29	8.235512e+000	0	0	0	0	0	0	76.5229	1	1	54.4085	31.9032
DATA	1081	13	61	0	0	A_44_P684315	NM_001109104	8263.5	278	6.024635e+004	6.024636e+003	52525	31	8.035785e+000	0	0	0	0	0	0	53865	1	1	54.1152	31.5769
DATA	1082	13	62	0	0	A_64_P142620	NM_201417	8288.57	278.103	8.532035e+001	9.147484e+000	138	28	5.460175e+000	0	0	0	0	0	0	75.9193	1	1	46.5243	27.1563
DATA	1083	13	63	0	0	A_42_P568419	NM_001011894	8313.83	277.677	2.530186e+003	2.530404e+002	2295	32.5	9.488220e+000	0	0	0	1	0	0	2240.2	1	1	45.4864	32.9737
DATA	1084	13	64	0	0	A_42_P519868	NM_053906	8339.47	277.844	7.907589e+001	8.580738e+000	129	28	8.406447e+000	0	0	0	0	0	0	69.6675	1	1	44.4243	29.0938
DATA	1085	13	65	0	0	A_43_P12346	NM_022943	8365.09	278.386	1.110466e+002	1.159833e+001	161.5	30	8.979623e+000	0	0	0	0	0	0	97.3594	1	1	65	32.2432
DATA	1087	13	67	0	0	A_44_P556989	NM_012610	8415.58	278.427	9.007352e+001	9.621045e+000	137	29	8.600111e+000	0	0	0	0	0	0	78.1924	1	1	57.5363	28.4762
DATA	1088	13	68	0	0	A_64_P113079	XM_218149	8441.55	278.351	3.410912e+000	3.398567e+000	61	29	9.217986e+000	0	0	0	0	0	0	-0.303221	0	0	48.8603	29.1667
DATA	1089	13	69	0	0	A_64_P003937	NM_173111	8466.29	277.833	4.976170e+003	4.976287e+002	4184	29	1.030997e+001	0	0	0	0	0	0	4276.12	1	1	45.835	30.8462
DATA	1090	13	70	0	0	A_42_P771337	NM_001012015	8492.23	277.877	9.588414e+001	1.018451e+001	145	32.5	9.735037e+000	0	0	0	0	0	0	81.9754	1	1	45.835	32.3235
DATA	1091	13	71	0	0	A_44_P401035	A_44_P401035	8517.42	278.427	5.932234e+001	6.862356e+000	111	28	6.638035e+000	0	0	0	0	0	0	50.4738	1	1	57.5363	28.4688
DATA	1092	13	72	0	0	A_42_P536292	NM_033359	8542.58	278.427	7.580788e+002	7.588711e+001	682.5	30.5	1.148881e+001	0	0	0	0	0	0	641.823	1	1	57.5363	33.5833
DATA	1093	13	73	0	0	A_44_P128564	NM_001109121	8568.42	278.427	1.382016e+002	1.425264e+001	177.5	29.5	9.042209e+000	0	0	0	0	0	0	116.417	1	1	57.5363	30.8077
DATA	1094	13	74	0	0	A_64_P069957	NM_173315	8593.58	278.427	1.585660e+001	3.843798e+000	73	30	1.000751e+001	0	0	0	0	0	0	13.2919	1	0	65	30.6897
DATA	1095	13	75	0	0	A_44_P538691	NM_031772	8619.05	278.108	1.284252e+002	1.331595e+001	167	28	8.430466e+000	0	0	0	0	0	0	107.114	1	1	46.8651	28.9643
DATA	1096	13	76	0	0	A_44_P499231	NM_001034148	8644.35	278.215	5.016311e+002	5.028760e+001	479	32	8.616563e+000	0	0	0	0	0	0	416.373	1	1	50.4627	32.3871
DATA	1097	13	77	0	0	A_64_P121489	XM_001065883	8669.58	278.427	7.925182e+000	3.640299e+000	68	28	7.093664e+000	0	0	0	0	0	0	6.54706	1	0	57.5363	28.4848
DATA	1098	13	78	0	0	A_42_P507072	FQ213070	8695.25	278.373	5.243567e+003	5.243688e+002	4319	28	7.934305e+000	0	0	0	0	0	0	4310.76	1	1	49.1849	29.1034
DATA	1099	13	79	0	0	A_64_P120075	ENSRNOT00000027841	8720.61	278.423	3.388446e+002	3.407381e+001	339	26	8.698084e+000	0	0	0	0	0	0	277.255	1	1	47.8731	29.36
DATA	1100	13	80	0	0	A_44_P1007362	NM_138864	8745.89	278.5	3.088445e+002	3.109400e+001	318	28	6.457803e+000	0	0	0	0	0	0	251.539	1	1	65	30.3548
DATA	1101	13	81	66	1	DarkCorner	DarkCorner	8771.59	278.482	3.633884e+000	3.620733e+000	56	28	6.486554e+000	0	0	0	0	0	0	-6.07267	0	0	52.0157	29.3462
DATA	1102	13	82	66	1	DarkCorner	DarkCorner	8796.67	278.5	3.650216e+000	3.637006e+000	52	27	8.440607e+000	0	0	0	0	0	0	-8.27023	0	0	57.5363	28.6207
DATA	1103	13	83	66	1	DarkCorner	DarkCorner	8821.71	278.597	3.666239e+000	3.652971e+000	59	31	8.909371e+000	0	0	0	0	0	0	-2.95755	0	0	44.0646	29.5758
DATA	1104	13	84	66	1	DarkCorner	DarkCorner	8848.06	278.228	3.683404e+000	3.670074e+000	55	27	7.107399e+000	0	0	0	0	0	0	-4.52599	0	0	49.8279	27.5313
DATA	1105	13	85	66	1	DarkCorner	DarkCorner	8873.16	278.311	3.699004e+000	3.687277e+000	61	26	7.525106e+000	0	0	0	0	0	0	0.881013	0	0	48.8603	28.7292
DATA	1106	14	1	66	1	DarkCorner	DarkCorner	6752.49	284.685	3.201103e+000	3.189704e+000	64	29	7.215669e+000	0	0	0	0	0	0	0.316828	0	0	48.8603	28.1389
DATA	1107	14	2	66	1	DarkCorner	DarkCorner	6777.77	284.72	3.179547e+000	3.168040e+000	59	29.5	6.749728e+000	0	0	0	0	0	0	-2.69033	0	0	51.4001	30.3235
DATA	1108	14	3	66	1	DarkCorner	DarkCorner	6802.89	284.662	3.159412e+000	3.147978e+000	57	29	8.157973e+000	0	0	0	0	0	0	-6.66406	0	0	47.8731	29.7556
DATA	1109	14	4	66	1	DarkCorner	DarkCorner	6828.44	285.129	3.139672e+000	3.128310e+000	55	29.5	7.985055e+000	0	0	0	0	0	0	-7.42031	0	0	47.5395	30.3056
DATA	1110	14	5	66	1	DarkCorner	DarkCorner	6854.42	284.573	3.121690e+000	3.110393e+000	54	29.5	6.532061e+000	0	0	0	0	0	0	-7.75501	0	0	57.5363	29.2333
DATA	1111	14	6	0	0	A_64_P151415	NM_001191684	6879.46	284.831	3.035903e+002	3.051624e+001	338	29	6.452103e+000	0	0	0	0	0	0	288.045	1	1	45.4864	29
DATA	1112	14	7	0	0	A_42_P475623	NM_053394	6904.75	284.644	1.956121e+003	1.956363e+002	1859	31	4.750212e+000	0	0	0	0	0	0	1865.34	1	1	48.5334	30.375
DATA	1113	14	8	0	0	A_44_P123636	ENSRNOT00000023689	6930.5	285	4.047742e+000	3.089424e+000	66.5	34	7.386162e+000	0	0	0	0	0	0	3.87905	1	0	54.1152	34.3462
DATA	1114	14	9	0	0	A_64_P135207	ENSRNOT00000043866	6955.5	285	2.792629e+002	2.809228e+001	327	31.5	7.705443e+000	0	0	0	0	0	0	268.807	1	1	54.1152	31.5769
DATA	1115	14	10	0	0	A_42_P516693	NM_001107330	6981.09	284.935	1.200592e+001	3.265305e+000	73	28.5	7.084427e+000	0	0	0	0	0	0	11.6049	1	0	54.4085	29.375
DATA	1116	14	11	0	0	A_64_P125447	NM_001109231	7006.46	284.919	1.322505e+002	1.356657e+001	190	29.5	8.423135e+000	0	0	0	0	0	0	128.327	1	1	48.5334	29.2778
DATA	1117	14	12	0	0	A_42_P701756	NM_001107646	7031.65	284.906	3.247580e+003	3.247720e+002	3138	36	7.582521e+000	0	0	0	0	0	0	3162.41	1	1	50.1463	35.1935
DATA	1118	14	13	0	0	A_44_P344181	NM_017204	7056.93	284.786	1.020415e+003	1.020857e+002	1028	34	8.942619e+000	0	0	0	0	0	0	996.871	1	1	46.8651	34.4483
DATA	1119	14	14	0	0	A_64_P035330	ENSRNOT00000066415	7082.64	284.813	5.308724e+002	5.317168e+001	575.5	34.5	1.122474e+001	0	0	0	0	0	0	520.197	1	1	49.5074	36.0714
DATA	1120	14	15	0	0	A_42_P837533	NM_001134546	7107.99	284.885	7.855641e+003	7.855698e+002	7685.5	33	7.869303e+000	0	0	0	0	0	0	7718.59	1	1	48.2044	33.1852
DATA	1121	14	16	0	0	A_42_P744291	NM_001025729	7133.43	284.754	2.585424e+003	2.585595e+002	2566	33	9.057166e+000	0	0	0	0	0	0	2546.41	1	1	45.4864	33.0323
DATA	1122	14	17	0	0	A_44_P149267	NM_001013099	7158.63	285	2.423278e+001	3.835962e+000	87	28	6.837397e+000	0	0	0	0	0	0	23.9194	1	1	48.5334	28
DATA	1123	14	18	0	0	A_64_P002546	NM_144741	7184.2	285.057	9.389622e+000	3.112933e+000	71	31	6.070553e+000	0	0	0	0	0	0	9.28587	1	0	46.8651	30.5806
DATA	1124	14	19	0	0	A_42_P808236	NM_001107189	7209.31	284.986	1.273367e+002	1.307391e+001	189	27	5.466496e+000	0	0	0	0	0	0	126.129	1	1	47.2035	27.1515
DATA	1125	14	20	0	0	A_44_P425848	NM_001108747	7234.87	285.1	6.456572e+002	6.463349e+001	697	28.5	8.919555e+000	0	0	0	0	0	0	640.423	1	1	46.8651	28.9615
DATA	1126	14	21	0	0	A_43_P17405	TC612613	7260.5	285	1.821910e+002	1.845733e+001	241.5	31	7.197142e+000	0	0	0	0	0	0	180.911	1	1	54.1152	32.1667
DATA	1127	14	22	0	0	A_64_P022402	NM_001142304	7285.36	284.943	1.217149e+001	3.194461e+000	73	30	5.574838e+000	0	0	0	0	0	0	12.0959	1	0	46.8651	29.6897
DATA	1128	14	23	0	0	A_44_P1019726	ENSRNOT00000025138	7311.09	285.104	2.491641e+002	2.509062e+001	307	30.5	8.048242e+000	0	0	0	0	0	0	247.778	1	1	46.8651	32.5
DATA	1129	14	24	0	0	A_44_P128186	NM_053305	7336.38	285	1.585905e+002	1.613119e+001	222	34.5	8.456549e+000	0	0	0	0	0	0	157.763	1	1	48.5334	33.4286
DATA	1130	14	25	0	0	A_44_P203665	NM_001105725	7362	285	1.343369e+002	1.375382e+001	196	29	7.845212e+000	0	0	0	0	0	0	133.654	1	1	54.9904	29.8788
DATA	1131	14	26	0	0	A_42_P688802	DV723748	7387.24	285	4.477728e+003	4.477825e+002	4372	31	8.638061e+000	0	0	0	0	0	0	4454.54	1	1	46.8651	32.2667
DATA	1132	14	27	0	0	A_64_P129943	NM_001105712	7412.75	285	4.343273e+002	4.353289e+001	485	29	7.976713e+000	0	0	0	0	0	0	431.939	1	1	49.1849	30.8065
DATA	1133	14	28	0	0	A_64_P017577	NM_001106982	7438.39	285.069	1.701720e+001	3.408185e+000	81	34.5	8.830188e+000	0	0	0	0	0	0	16.9147	1	1	65	35.25
DATA	1134	14	29	0	0	A_44_P235926	NM_024138	7463.22	284.866	3.508157e+002	3.520582e+001	403	33	6.263778e+000	0	0	0	0	0	0	348.431	1	1	46.1809	33.2778
DATA	1135	14	30	0	0	A_42_P611638	NM_001034137	7488.7	284.9	1.975229e+003	1.975450e+002	1973	27	5.153042e+000	0	0	0	0	0	0	1959.93	1	1	47.2035	27.9231
DATA	1136	14	31	0	0	A_42_P654878	NM_001107919	7514.17	285	2.225702e+003	2.225899e+002	2189	30.5	7.658591e+000	0	0	0	0	0	0	2205.93	1	1	46.8651	31.6333
DATA	1137	14	32	0	0	A_64_P017464	NM_001135687	7539.55	284.935	4.675160e+000	3.002153e+000	69	32	1.036656e+001	0	0	0	0	0	0	4.62727	1	0	49.5074	34.5862
DATA	1138	14	33	0	0	A_64_P152873	NM_001207022	7565.42	285.427	6.324203e+001	6.986845e+000	125	34.5	9.670256e+000	0	0	0	0	0	0	62.5016	1	1	57.5363	35.0769
DATA	1139	14	34	0	0	A_64_P013243	A_64_P013243	7590	285.278	1.089445e+004	1.089449e+003	10540	36	1.372154e+001	0	0	0	0	0	0	10748.4	1	1	47.8731	37.8857
DATA	1140	14	35	0	0	A_64_P029720	NM_001109405	7615.51	285.411	2.511479e+002	2.529106e+001	309.5	33	6.870695e+000	0	0	0	0	0	0	247.31	1	1	48.5334	32.8387
DATA	1141	14	36	0	0	A_43_P13459	NM_001107548	7640.93	285.425	2.154362e+002	2.174971e+001	269	33	5.610315e+000	0	0	0	0	0	0	211.698	1	1	48.5334	33.3714
DATA	1142	14	37	0	0	A_64_P053923	NM_001107323	7666.49	284.875	1.842067e+003	1.842311e+002	1824.5	32.5	6.831637e+000	0	0	0	0	0	0	1805.76	1	1	47.8731	33.1333
DATA	1143	14	38	0	0	A_44_P1005199	ENSRNOT00000032786	7692.42	285.427	4.882336e+001	5.731060e+000	109	29.5	6.641221e+000	0	0	0	0	0	0	47.7472	1	1	57.5363	30.4286
DATA	1144	14	39	0	0	A_44_P104821	NM_024369	7717.47	284.939	1.609064e+002	1.636963e+001	220	29	8.396202e+000	0	0	0	0	0	0	156.939	1	1	45.1352	30.3939
DATA	1145	14	40	0	0	A_64_P009956	A_64_P009956	7742.95	285.477	5.793764e+002	5.801616e+001	630	29.5	8.750115e+000	0	0	0	0	0	0	563.591	1	1	55.8519	30.125
DATA	1146	14	41	0	0	A_64_P060947	NM_203334	7768.42	285.427	4.261443e+001	5.226660e+000	102	30	7.654514e+000	0	0	0	0	0	0	41.3319	1	1	57.5363	30.2703
DATA	1147	14	42	0	0	A_64_P103419	NM_001106291	7793.58	285.427	6.790083e+000	3.110447e+000	69	33.5	7.216600e+000	0	0	0	0	0	0	6.56577	1	0	57.5363	32.7
DATA	1148	14	43	0	0	A_44_P220827	NM_001012051	7819.11	285.5	1.085877e+003	1.086304e+002	1086	32	6.065613e+000	0	0	0	0	0	0	1046.65	1	1	56.9804	31.3333
DATA	1149	14	44	0	1	ETG07_105829	ETG07_105829	7844.5	285.5	7.514154e+000	3.146396e+000	70.5	32	8.021769e+000	0	0	0	0	0	0	7.21854	1	0	57.5363	32.5854
DATA	1150	14	45	0	0	A_42_P719478	NM_001191779	7869.96	285.084	2.517916e+001	3.967614e+000	85.5	32	4.806411e+000	0	0	0	0	0	0	24.1024	1	1	46.8651	32.6111
DATA	1151	14	46	0	0	A_42_P462257	NM_001109481	7895.44	285.027	1.890365e+004	1.890368e+003	17655	30.5	7.331701e+000	0	0	0	0	0	0	18029.9	1	1	48.5334	31.9231
DATA	1152	14	47	0	0	A_44_P105634	NM_001007658	7920.58	285.427	1.669861e+002	1.698182e+001	226	34	6.728530e+000	0	0	0	0	0	0	158.697	1	1	57.5363	32.8387
DATA	1153	14	48	0	0	A_64_P100594	NM_001000360	7946.11	285.5	6.980006e+001	7.637573e+000	128	33.5	6.985512e+000	0	0	0	0	0	0	66.0813	1	1	65	32.9063
DATA	1154	14	49	0	0	A_64_P004266	A_64_P004266	7971.28	285.625	1.454590e+001	3.435503e+000	75	31	7.598032e+000	0	0	0	0	0	0	13.7177	1	0	48.2044	30.5128
DATA	1155	14	50	0	0	A_44_P156343	NM_001000102	7996.67	285.5	1.443017e+001	3.442137e+000	75	35.5	9.055385e+000	0	0	0	0	0	0	13.5533	1	0	65	36
DATA	1156	14	51	0	0	A_42_P504358	NM_001108674	8022.33	285.5	4.589512e+002	4.600228e+001	484.5	36.5	1.451073e+001	0	0	0	0	0	0	429.26	1	1	57.5363	40.9211
DATA	1157	14	52	0	0	A_44_P281468	NM_001127556	8047.5	285.5	1.814679e+001	3.636506e+000	82.5	28	7.812590e+000	0	0	0	0	0	0	16.9017	1	1	65	30.6452
DATA	1158	14	53	0	0	A_43_P12785	NM_053364	8073.11	285.5	3.176631e+000	3.170794e+000	63	30	9.693845e+000	0	0	0	0	0	0	1.75608	0	0	56.9804	31.9722
DATA	1159	14	54	0	0	A_64_P053297	NM_001107278	8098.04	285.145	3.632424e+003	3.632563e+002	3389	29.5	6.837104e+000	0	0	0	0	0	0	3353.67	1	1	46.8651	29.7353
DATA	1160	14	55	0	0	A_64_P062986	NM_001001018	8123.39	285.063	1.932930e+001	3.732859e+000	79	29.5	4.399826e+000	0	0	0	0	0	0	17.766	1	1	44.7812	29.3929
DATA	1161	14	56	0	0	A_44_P529226	NM_023091	8149.33	285.5	3.219649e+000	3.207997e+000	62	29	7.943201e+000	0	0	0	0	0	0	-1.07916	0	0	65	29.3611
DATA	1162	14	57	0	0	A_42_P559737	NM_020074	8174.5	285.5	2.662386e+003	2.662581e+002	2449	30	9.013968e+000	0	0	0	0	0	0	2424.82	1	1	49.1849	32.5806
DATA	1163	14	58	0	0	A_44_P1017458	NM_199402	8200	285.545	1.629788e+002	1.661640e+001	209	29	8.139486e+000	0	0	0	0	0	0	147.741	1	1	55.8519	30.4138
DATA	1164	14	59	0	0	A_44_P407750	NM_001127680	8225.06	285.611	1.670895e+003	1.671211e+002	1528	28	8.205039e+000	0	0	0	0	0	0	1507.64	1	1	48.2044	30.4138
DATA	1165	14	60	0	0	A_64_P033872	NM_001037353	8250.67	285.5	2.792559e+001	4.299251e+000	89	31	7.766291e+000	0	0	0	0	0	0	25.0751	1	1	57.5363	32.3793
DATA	1166	14	61	0	0	A_42_P472699	NM_001108061	8275.77	285.183	9.172829e+001	9.743215e+000	145	31	6.680978e+000	0	0	0	1	0	0	81.9661	1	1	47.2035	31.2759
DATA	1167	14	62	0	0	A_44_P201215	ENSRNOT00000014231	8301.45	285.388	1.530961e+001	3.638539e+000	74	28.5	8.683516e+000	0	0	0	0	0	0	13.6138	1	0	45.835	29.9
DATA	1168	14	63	0	0	A_64_P129910	NM_001107648	8326.62	285.562	6.437826e+002	6.446364e+001	621.5	35.5	1.034195e+001	0	0	0	0	0	0	569.72	1	1	48.2044	34.7368
DATA	1169	14	64	0	0	A_64_P027927	NM_022255	8352	285.53	1.023901e+002	1.076788e+001	153	29	9.017449e+000	0	0	0	0	0	0	90.1645	1	1	45.1352	31.4242
DATA	1170	14	65	0	0	A_64_P101623	A_64_P101623	8377.69	285.517	3.916543e+004	3.916544e+003	34504.5	32	7.050230e+000	0	0	0	0	0	0	34316.4	1	1	52.3208	32.1333
DATA	1171	14	66	0	0	A_42_P645110	NM_001029919	8403.33	285.5	3.823618e+004	3.823619e+003	33087.5	32	8.549671e+000	0	0	0	0	0	0	33334.2	1	1	57.5363	30.5926
DATA	1172	14	67	0	0	A_64_P017781	NM_001010956	8428.17	285.536	2.380273e+002	2.404197e+001	261	31.5	9.324544e+000	0	0	0	0	0	0	206.505	1	1	47.2035	30.1333
DATA	1173	14	68	0	0	A_64_P057106	NM_001004087	8454	285.545	1.813535e+002	1.845138e+001	215	30	6.565376e+000	0	0	0	0	0	0	156.54	1	1	55.8519	29.3333
DATA	1174	14	69	0	0	A_44_P187005	NM_022238	8479.25	285.567	9.501241e+001	1.009711e+001	145	33.5	8.748214e+000	0	0	0	0	0	0	81.607	1	1	46.5243	31.2813
DATA	1175	14	70	0	0	A_42_P779933	NM_017117	8504.67	285.1	3.230968e+001	4.715635e+000	88	30.5	8.850562e+000	0	0	0	0	0	0	27.6095	1	1	43.7019	30.9706
DATA	1176	14	71	0	0	A_42_P555701	NM_001107554	8530.13	285.377	1.619200e+004	1.619204e+003	13889	30	9.267063e+000	0	0	0	1	0	0	13768.7	1	1	46.8651	30.9615
DATA	1177	14	72	0	0	A_42_P705302	NM_001107361	8555.31	285.535	7.925826e+003	7.925902e+002	6772	31	8.990180e+000	0	0	0	0	0	0	6706.85	1	1	47.8731	31.64
DATA	1178	14	73	0	0	A_64_P015435	A_64_P015435	8580.91	285.614	4.509137e+004	4.509139e+003	38421	31	7.142226e+000	0	0	0	0	0	0	37967.8	1	1	57.259	31.3704
DATA	1179	14	74	0	0	A_64_P036217	NM_001000569	8606.56	285.653	7.074141e+001	7.894013e+000	118	30	7.678141e+000	0	0	0	0	0	0	59.2717	1	1	49.1849	29.0769
DATA	1180	14	75	0	0	A_44_P543511	NM_001024749	8631.63	286.1	2.105824e+003	2.106119e+002	1888.5	30	1.059369e+001	0	0	0	0	0	0	1756.14	1	1	43.7019	32.6786
DATA	1181	14	76	0	0	A_42_P759043	NM_001134509	8656.97	285.781	7.353030e+002	7.361532e+001	657	31.5	9.543343e+000	0	0	0	0	0	0	610.194	1	1	47.5395	31.3056
DATA	1182	14	77	0	0	A_42_P679982	NM_001107835	8682.5	285.5	4.455645e+003	4.455787e+002	3653.5	29	5.948367e+000	0	0	0	0	0	0	3679.46	1	1	49.1849	29.1875
DATA	1183	14	78	0	0	A_43_P18064	NM_001106904	8707.61	285.931	1.056177e+001	3.723514e+000	68	31	1.028921e+001	0	0	0	0	0	0	8.68217	1	0	65	31.7083
DATA	1184	14	79	0	0	A_64_P092143	NM_001129879	8733.5	286	5.171002e+003	5.171126e+002	4193	26.5	6.426388e+000	0	0	0	0	0	0	4230.58	1	1	54.1152	28.5385
DATA	1185	14	80	0	0	A_64_P102886	A_64_P102886	8758.92	285.953	1.578976e+001	3.935001e+000	75	27	6.465649e+000	0	0	0	0	0	0	12.8583	1	0	45.835	29.2692
DATA	1186	14	81	66	1	DarkCorner	DarkCorner	8784.09	285.935	3.633807e+000	3.620656e+000	54	25	7.242628e+000	0	0	0	0	0	0	-6.07522	0	0	54.4085	26.7931
DATA	1187	14	82	66	1	DarkCorner	DarkCorner	8810.05	285.835	3.650616e+000	3.637404e+000	56	31	8.693956e+000	0	0	0	0	0	0	-2.91346	0	0	48.5334	29.0571
DATA	1188	14	83	66	1	DarkCorner	DarkCorner	8834.97	285.985	3.666268e+000	3.652999e+000	55	27	7.503251e+000	0	0	0	0	0	0	-4.26997	0	0	46.8651	26.4146
DATA	1189	14	84	66	1	DarkCorner	DarkCorner	8860.3	285.785	3.682345e+000	3.669018e+000	56	30	7.890257e+000	0	0	0	0	0	0	-3.52603	0	0	49.1849	30.4483
DATA	1190	14	85	66	1	DarkCorner	DarkCorner	8885.92	285.918	3.697949e+000	3.689878e+000	61	27	7.156747e+000	0	0	0	0	0	0	1.57673	0	0	46.8651	27.7177
DATA	1191	15	1	66	1	DarkCorner	DarkCorner	6739.32	291.963	3.206073e+000	3.194871e+000	62.5	27	7.148115e+000	0	0	0	0	0	0	0.46479	0	0	49.5074	27.3083
DATA	1192	15	2	66	1	DarkCorner	DarkCorner	6765.32	292.236	3.183204e+000	3.171683e+000	60	27	6.494139e+000	0	0	0	0	0	0	-2.40679	0	0	47.5395	27.5769
DATA	1193	15	3	66	1	DarkCorner	DarkCorner	6790.43	292.51	3.162350e+000	3.150906e+000	59	29.5	6.675106e+000	0	0	0	0	0	0	-2.88167	0	0	40.6843	30.4412
DATA	1194	15	4	66	1	DarkCorner	DarkCorner	6816.1	292.231	3.142737e+000	3.131363e+000	56.5	29	6.821292e+000	0	0	0	0	0	0	-5.14133	0	0	48.8603	29.5676
DATA	1195	15	5	66	1	DarkCorner	DarkCorner	6841.5	292	3.124456e+000	3.113148e+000	55	32	7.139019e+000	0	0	0	0	0	0	-7.39993	0	0	65	32.0323
DATA	1196	15	6	0	0	A_44_P451392	NM_001108023	6866.5	292	3.558768e+002	3.572211e+001	391.5	32	5.981081e+000	0	0	0	0	0	0	337.374	1	1	54.1152	30.76
DATA	1197	15	7	0	0	A_64_P012661	ENSRNOT00000010298	6892	292	1.374937e+003	1.375282e+002	1392	29	8.768927e+000	0	0	0	0	0	0	1310.34	1	1	46.8651	30.5862
DATA	1198	15	8	0	0	A_42_P546058	NM_053670	6917.44	292.139	3.881584e+003	3.881705e+002	3660	31	7.085683e+000	0	0	0	0	0	0	3717.64	1	1	47.8731	33
DATA	1199	15	9	0	0	A_42_P695401	NM_031530	6943	292	9.937509e+001	1.039518e+001	155	35.5	8.754722e+000	0	0	0	0	0	0	95.6171	1	1	65	36.25
DATA	1200	15	10	0	0	A_44_P192193	A_44_P192193	6967.87	292.329	1.433127e+002	1.464962e+001	202	29.5	6.622143e+000	0	0	0	0	0	0	138.487	1	1	46.8651	29.3421
DATA	1201	15	11	0	0	A_42_P473886	NM_001165922	6993.74	292.353	4.063645e+002	4.074890e+001	449.5	28	7.171029e+000	0	0	0	0	0	0	394.284	1	1	46.1809	29.0968
DATA	1202	15	12	0	0	A_42_P576953	NM_138882	7019.11	292.162	6.561460e+002	6.568379e+001	701.5	32	7.763576e+000	0	0	0	0	0	0	638.964	1	1	47.5395	31.8387
DATA	1203	15	13	0	0	A_44_P260227	ENSRNOT00000036745	7044.5	292	5.065111e+001	5.888904e+000	112	37	7.545874e+000	0	0	0	0	0	0	49.4907	1	1	54.1152	36.625
DATA	1204	15	14	0	0	A_44_P276435	NM_053853	7069.73	291.986	2.524665e+002	2.542364e+001	308	30.5	1.109074e+001	0	0	0	0	0	0	247.445	1	1	47.2035	34.7308
DATA	1205	15	15	0	0	A_43_P19066	NM_001017494	7095.33	291.942	1.817902e+002	1.842266e+001	239.5	29	9.466456e+000	0	0	0	0	0	0	178.681	1	1	46.5243	33.2
DATA	1206	15	16	0	0	A_64_P113200	ENSRNOT00000061930	7120.59	292.159	3.521675e+001	4.612362e+000	99	28.5	9.232801e+000	0	0	0	0	0	0	34.7038	1	1	47.2035	30.2692
DATA	1207	15	17	0	0	A_42_P480108	NM_001007637	7145.79	292.301	1.564407e+003	1.564689e+002	1599.5	29.5	8.417893e+000	0	0	0	0	0	0	1545.14	1	1	48.2044	31.0333
DATA	1209	15	19	0	0	A_44_P420046	NM_021669	7196.91	292.386	1.266172e+002	1.300323e+001	187.5	30	8.030474e+000	0	0	0	0	0	0	125.531	1	1	57.259	31.1667
DATA	1210	15	20	0	0	A_64_P077021	A_64_P077021	7222.42	292.427	2.340417e+001	3.770475e+000	87	29	8.608885e+000	0	0	0	0	0	0	23.2378	1	1	57.5363	30.625
DATA	1211	15	21	0	0	A_44_P292558	NM_213559	7247.43	291.761	2.274502e+002	2.293592e+001	290	32.5	8.882165e+000	0	0	0	0	0	0	226.07	1	1	46.5243	31.8214
DATA	1212	15	22	0	0	A_42_P471653	NM_001031654	7273.42	292.427	2.310157e+001	3.746697e+000	85	28	4.649682e+000	0	0	0	0	0	0	22.9874	1	1	57.5363	28.3667
DATA	1213	15	23	0	0	A_43_P12000	NM_019272	7298.3	292.1	6.798588e+002	6.804976e+001	731.5	32	7.627892e+000	0	0	0	0	0	0	676.925	1	1	47.2035	33.5517
DATA	1214	15	24	0	0	A_64_P131395	NM_001037523	7324	292.455	1.136547e+001	3.157844e+000	75	35	8.079993e+000	0	0	0	0	0	0	11.3228	1	0	55.8519	33.9375
DATA	1215	15	25	0	0	A_42_P682853	NM_017193	7349.2	292.239	7.585796e+002	7.591513e+001	817	31	7.809437e+000	0	0	0	0	0	0	755.874	1	1	46.8651	32.3889
DATA	1216	15	26	0	0	A_42_P647505	TC640289	7374.44	292.26	4.076274e+003	4.076381e+002	4031.5	32.5	7.086391e+000	0	0	0	0	0	0	4061.8	1	1	49.5074	32.0714
DATA	1217	15	27	0	0	A_44_P682959	NM_001025139	7400.11	292.5	1.203519e+001	3.182447e+000	75	28	6.509592e+000	0	0	0	0	0	0	11.9905	1	0	56.9804	28.4857
DATA	1218	15	28	0	0	A_64_P249426	NM_001014271	7425.5	292.5	1.593226e+001	3.350442e+000	76.5	30	8.529472e+000	0	0	0	0	0	0	15.8661	1	1	57.5363	31.5758
DATA	1219	15	29	0	0	A_64_P133430	NM_001044282	7450.89	292.5	3.285500e+004	3.285502e+003	32060	34.5	7.124497e+000	0	0	0	0	0	0	32697.3	1	1	56.9804	35.0385
DATA	1220	15	30	0	0	A_42_P635611	NM_001025685	7476.42	292.427	5.635848e+000	3.005231e+000	67.5	30	6.087898e+000	0	0	0	0	0	0	5.60385	1	0	57.5363	31
DATA	1221	15	31	0	0	A_42_P592013	NM_001127600	7501.23	292.116	2.849513e+003	2.849666e+002	2847	27	5.103124e+000	0	0	0	0	0	0	2830.2	1	1	46.5243	28.5517
DATA	1222	15	32	0	1	ETG02_36680	ETG02_36680	7527.11	292.5	6.492936e+000	3.029162e+000	68.5	32	8.584555e+000	0	0	0	0	0	0	6.44113	1	0	56.9804	33.1379
DATA	1223	15	33	0	0	A_42_P608478	NM_001025131	7552.5	292.5	1.250322e+001	3.216082e+000	75	34	8.299096e+000	0	0	0	0	0	0	12.3853	1	0	65	34
DATA	1224	15	34	0	0	A_44_P137397	NM_017236	7577.67	292.5	1.023711e+005	1.023711e+004	102826	42.5	1.460416e+001	0	0	0	0	0	0	101240	1	1	57.5363	43.1923
DATA	1226	15	36	0	0	A_64_P110789	A_64_P110789	7628.5	292.5	1.439721e+001	3.309020e+000	77	33	5.573465e+000	0	0	0	0	0	0	14.1834	1	0	57.5363	32.9688
DATA	1227	15	37	0	0	A_64_P061562	A_64_P061562	7653.54	292.386	1.316271e+003	1.316610e+002	1308	31	7.332814e+000	0	0	0	0	0	0	1293.9	1	1	47.5395	31.3125
DATA	1228	15	38	0	0	A_44_P511359	NM_001108736	7679.14	292.014	5.057536e+002	5.066385e+001	550	32	7.142314e+000	0	0	0	0	0	0	495.938	1	1	46.8651	32.4333
DATA	1229	15	39	0	0	A_42_P658220	NM_001109598	7704.54	292.386	3.012449e+003	3.012598e+002	2963	30.5	7.446051e+000	0	0	0	0	0	0	2946.77	1	1	47.5395	30.9333
DATA	1230	15	40	0	0	A_42_P479096	NM_001008293	7730.33	292.5	1.427120e+003	1.427438e+002	1457	32	9.444911e+000	0	0	0	0	0	0	1392.24	1	1	57.5363	31.7778
DATA	1231	15	41	0	0	A_64_P275280	NM_001109569	7755.38	292.5	1.100678e+004	1.100682e+003	10487.5	30	7.760792e+000	0	0	0	0	0	0	10707.8	1	1	48.5334	29.6667
DATA	1232	15	42	0	0	A_42_P785926	NM_001108289	7780.63	292.64	1.205291e+003	1.205671e+002	1178.5	34	1.015030e+001	0	0	0	0	0	0	1169.12	1	1	48.8603	35.5185
DATA	1233	15	43	0	0	A_64_P005238	A_64_P005238	7806.5	292.5	4.565480e+001	5.482625e+000	104	32	6.811171e+000	0	0	0	0	0	0	44.1424	1	1	57.5363	32.2727
DATA	1234	15	44	0	0	A_42_P555753	NM_001106401	7831.51	292.573	5.072911e+003	5.073003e+002	4703.5	32	8.149560e+000	0	0	0	0	0	0	4889.19	1	1	49.1849	33.1875
DATA	1235	15	45	0	0	A_42_P469751	XM_001054007	7857	292.271	3.156567e+002	3.171326e+001	360	34	7.897978e+000	0	0	0	0	0	0	303.17	1	1	46.8651	34.8537
DATA	1236	15	46	0	0	A_44_P506124	XM_222590	7882.44	292.479	5.490661e+003	5.490747e+002	5314	32	3.387691e+000	0	0	0	0	0	0	5255.11	1	1	48.2044	32.2083
DATA	1237	15	47	0	0	A_44_P441947	XM_001079870	7907.82	292.382	1.187516e+003	1.187915e+002	1210	33	6.805437e+000	0	0	0	0	0	0	1132.41	1	1	46.8651	31.7742
DATA	1238	15	48	0	0	A_64_P127659	NM_001106228	7933.46	292.542	5.803638e+003	5.803720e+002	5467.5	33.5	6.966437e+000	0	0	0	0	0	0	5513.55	1	1	48.5334	33.7188
DATA	1239	15	49	0	0	A_42_P733076	NM_001033867	7958.58	292.573	3.138413e+002	3.153701e+001	358.5	33	6.387086e+000	0	0	0	0	0	0	297.015	1	1	65	31.5556
DATA	1240	15	50	0	0	A_64_P145939	NM_001109499	7984.33	292.5	7.282026e+001	7.919914e+000	132	32.5	8.025639e+000	0	0	0	0	0	0	68.6374	1	1	57.5363	32.2059
DATA	1241	15	51	0	0	A_44_P1040796	NM_001106660	8009.5	293	1.472152e+004	1.472156e+003	13539	39	9.534318e+000	0	0	0	0	0	0	13821.4	1	1	48.5334	39.3548
DATA	1242	15	52	0	0	A_42_P588072	NM_001106829	8035	292.545	3.528625e+001	4.723269e+000	97.5	32	7.889161e+000	0	0	0	0	0	0	32.9868	1	1	55.8519	32.9412
DATA	1243	15	53	0	0	A_64_P045823	ENSRNOT00000023172	8060.42	292.573	2.240262e+002	2.262343e+001	269	33	9.752615e+000	0	0	0	0	0	0	208.536	1	1	57.5363	32.4722
DATA	1244	15	54	0	0	A_42_P591344	NM_001037780	8085.58	292.573	4.335457e+002	4.347008e+001	460	28.5	7.776984e+000	0	0	0	0	0	0	401.832	1	1	57.5363	30.5
DATA	1245	15	55	0	0	A_64_P120322	A_64_P120322	8111.19	292.57	5.341197e+000	3.225520e+000	66.5	30	5.374075e+000	0	0	0	0	0	0	4.92841	1	0	58.0869	29.4545
DATA	1246	15	56	0	0	A_64_P062665	NM_001170470	8136	292.729	4.858898e+002	4.869391e+001	494	28	6.576051e+000	0	0	0	0	0	0	446.386	1	1	46.8651	27.8889
DATA	1247	15	57	0	0	A_44_P398300	NM_001005538	8161.63	292.873	3.576651e+003	3.576795e+002	3242	31	9.856838e+000	0	0	0	0	0	0	3270.85	1	1	47.5395	33.5625
DATA	1248	15	58	0	0	A_64_P001545	ENSRNOT00000029141	8187.42	292.573	5.017244e+004	5.017245e+003	45032	30	8.056921e+000	0	0	0	0	0	0	45663.9	1	1	57.5363	31.2258
DATA	1249	15	59	0	0	A_44_P1010653	NM_001109021	8212.7	292.9	7.699230e+003	7.699298e+002	7011	26	8.192883e+000	0	0	0	0	0	0	6975.24	1	1	47.2035	29.04
DATA	1250	15	60	0	0	A_44_P398969	NM_001013225	8238.09	292.614	5.969784e+002	5.978654e+001	593.5	29	8.613443e+000	0	0	0	0	0	0	538.245	1	1	57.259	31.4839
DATA	1251	15	61	0	0	A_64_P059495	NM_001109986	8263.5	292.735	4.088134e+003	4.088265e+002	3646.5	33	1.022828e+001	0	0	0	0	0	0	3668.39	1	1	46.5243	34.3929
DATA	1252	15	62	0	0	A_64_P037040	A_64_P037040	8288.71	293.167	3.241459e+002	3.258076e+001	357	29	5.321788e+000	0	0	0	0	0	0	289.503	1	1	45.835	28.8929
DATA	1253	15	63	0	0	A_64_P051446	NM_001142942	8314.09	292.896	9.428013e+003	9.428071e+002	8241	27	8.054152e+000	0	0	0	0	0	0	8378.95	1	1	46.8651	29.2703
DATA	1254	15	64	0	0	A_42_P701756	NM_001107646	8339.29	292.754	3.362954e+003	3.363117e+002	2999	31.5	8.296639e+000	0	0	0	1	0	0	2974.15	1	1	45.1352	33.1176
DATA	1255	15	65	0	0	A_44_P172604	NM_031795	8365.01	292.905	3.009494e+003	3.009679e+002	2647	29	8.975451e+000	0	0	0	0	0	0	2648.41	1	1	46.8651	31.9394
DATA	1256	15	66	0	0	A_64_P152000	A_64_P152000	8390.5	293	8.768913e+000	3.464655e+000	71	32	7.869654e+000	0	0	0	0	0	0	7.67877	1	0	54.1152	32.0625
DATA	1257	15	67	0	0	A_44_P339008	NM_001024975	8415.32	292.712	1.486475e+003	1.486857e+002	1340	33	9.428326e+000	0	0	0	0	0	0	1295.29	1	1	45.835	32.68
DATA	1258	15	68	0	0	A_44_P560070	A_44_P560070	8441.02	292.873	6.729116e+000	3.451456e+000	68	29.5	6.815330e+000	0	0	0	0	0	0	5.83447	1	0	42.5954	28.75
DATA	1259	15	69	0	0	A_44_P520509	NM_001033868	8466.7	292.9	6.102867e+003	6.102962e+002	5236.5	30.5	6.348952e+000	0	0	0	0	0	0	5264.98	1	1	47.2035	29.6333
DATA	1260	15	70	0	0	A_42_P643349	NM_001109495	8491.9	292.829	5.302301e+001	6.309115e+000	110	30	1.054666e+001	0	0	0	0	0	0	45.5174	1	1	46.8651	31.3429
DATA	1261	15	71	0	0	A_44_P215075	NM_012667	8517.38	292.682	1.581587e+002	1.618488e+001	198.5	31	7.851885e+000	0	0	0	0	0	0	135.091	1	1	45.835	30.7714
DATA	1262	15	72	0	0	A_44_P560363	ENSRNOT00000049736	8542.86	292.808	2.198642e+003	2.198914e+002	1965	28	7.348346e+000	0	0	0	0	0	0	1868.74	1	1	47.5395	28.4583
DATA	1263	15	73	0	0	A_44_P553158	NM_001014014	8567.87	292.9	1.660313e+003	1.660675e+002	1419	31	9.476802e+000	0	0	0	0	0	0	1404.39	1	1	46.8651	32.625
DATA	1264	15	74	0	0	A_64_P165277	NM_001106370	8593.5	293	6.743794e+000	3.551763e+000	67.5	31.5	9.292748e+000	0	0	0	0	0	0	5.67628	1	0	54.1152	31.7
DATA	1265	15	75	0	0	A_64_P138187	A_64_P138187	8618.93	293	1.172945e+003	1.173469e+002	1042	33	1.702204e+001	0	0	0	0	0	0	982.469	1	1	46.8651	38.25
DATA	1266	15	76	0	0	A_44_P429041	XM_227654	8644.22	293.134	2.569177e+002	2.593192e+001	276	32	1.035802e+001	0	0	0	0	0	0	214.17	1	1	46.1809	31.4333
DATA	1267	15	77	0	0	A_44_P465880	NM_199389	8669.86	292.808	3.923938e+003	3.924097e+002	3293	29	7.550541e+000	0	0	0	0	0	0	3254.95	1	1	47.5395	29.4474
DATA	1268	15	78	0	0	A_44_P381740	NM_001000239	8695.07	293.2	1.808353e+001	3.988255e+000	77	30	7.725164e+000	0	0	0	0	0	0	14.9317	1	1	46.8651	30.6667
DATA	1269	15	79	0	0	A_64_P045211	NM_001191733	8720.49	292.971	2.876845e+001	4.586207e+000	85.5	33	7.599943e+000	0	0	0	0	0	0	23.6413	1	1	47.2035	31.6774
DATA	1270	15	80	0	0	A_64_P010896	A_64_P010896	8746	293	6.897198e+000	3.654026e+000	67	27.5	6.634446e+000	0	0	0	0	0	0	5.64169	1	0	54.9904	29.3571
DATA	1271	15	81	0	0	A_42_P566906	NM_001006966	8771.23	293.087	4.355717e+003	4.355866e+002	3524.5	27	7.366034e+000	0	0	0	0	0	0	3546.79	1	1	46.5243	28.5385
DATA	1272	15	82	66	1	DarkCorner	DarkCorner	8796.5	293	3.634012e+000	3.620861e+000	53	30.5	8.662415e+000	0	0	0	0	0	0	-6.74838	0	0	54.1152	29.5882
DATA	1273	15	83	66	1	DarkCorner	DarkCorner	8822.06	293.127	3.650095e+000	3.636885e+000	57	31	9.384244e+000	0	0	0	0	0	0	-4.13774	0	0	46.8651	28.2759
DATA	1274	15	84	66	1	DarkCorner	DarkCorner	8847.59	293.154	3.666042e+000	3.652775e+000	59	30	7.485199e+000	0	0	0	0	0	0	-1.56888	0	0	49.5074	28.15
DATA	1275	15	85	66	1	DarkCorner	DarkCorner	8872.76	293.265	3.681416e+000	3.668093e+000	58	28	7.083044e+000	0	0	0	0	0	0	-1.90657	0	0	50.1463	28.9268
DATA	1276	16	1	66	1	DarkCorner	DarkCorner	6752.5	299.5	3.187634e+000	3.185214e+000	65	29	1.082082e+001	0	0	0	0	0	0	2.22555	0	0	57.5363	31.4865
DATA	1277	16	2	66	1	DarkCorner	DarkCorner	6777.95	299.788	3.166033e+000	3.154575e+000	62	30	6.299562e+000	0	0	0	0	0	0	-2.0675	0	0	49.8279	29.8438
DATA	1278	16	3	66	1	DarkCorner	DarkCorner	6803.2	299.658	3.146174e+000	3.134787e+000	60	29	5.856025e+000	0	0	0	0	0	0	-2.4152	0	0	49.5074	28.6316
DATA	1279	16	4	66	1	DarkCorner	DarkCorner	6828.58	299.427	3.127457e+000	3.116138e+000	62	30.5	6.889022e+000	0	0	0	0	0	0	-3.14832	0	0	57.5363	30.3
DATA	1280	16	5	0	0	A_42_P708614	NM_001130505	6854.33	299.5	6.034262e+004	6.034263e+003	56691.5	31	7.889248e+000	0	0	0	0	0	0	57168.4	1	1	57.5363	30.3667
DATA	1281	16	6	0	0	A_44_P427177	NM_053923	6879.52	298.693	4.180443e+000	3.110522e+000	67	32	5.872093e+000	0	0	0	0	0	0	3.98087	1	0	48.5334	31.5
DATA	1282	16	7	0	0	A_44_P417051	NM_001024886	6904.89	299.5	6.694859e+001	7.363582e+000	125.5	33	8.078281e+000	0	0	0	0	0	0	64.0885	1	1	65	33.5172
DATA	1283	16	8	0	0	A_64_P052917	ENSRNOT00000029053	6930.19	299.145	4.104388e+001	5.114738e+000	102	32.5	7.723136e+000	0	0	0	0	0	0	39.4728	1	1	46.1809	33.8056
DATA	1284	16	9	0	0	A_42_P689013	NM_053800	6955.5	299.5	2.019872e+004	2.019874e+003	19212	32.5	8.652220e+000	0	0	0	0	0	0	19513.2	1	1	49.1849	31.0333
DATA	1285	16	10	0	0	A_42_P668072	NM_013130	6981.11	299.5	2.189272e+002	2.210081e+001	263	29	9.266411e+000	0	0	0	0	0	0	212.378	1	1	56.9804	29.4595
DATA	1286	16	11	0	0	A_44_P762596	XM_237156	7006.44	299.733	3.131977e+002	3.146446e+001	375	30	8.285367e+000	0	0	0	0	0	0	305.005	1	1	49.1849	30.2258
DATA	1287	16	12	0	0	A_44_P673662	TC577636	7031.89	299.5	6.716900e+001	7.357852e+000	130	35.5	7.788989e+000	0	0	0	0	0	0	65.6396	1	1	56.9804	33.9063
DATA	1288	16	13	0	0	A_42_P674598	NM_013067	7057.42	299.573	4.772864e+004	4.772865e+003	45971	31	9.473496e+000	0	0	0	0	0	0	46794.3	1	1	57.5363	33.6667
DATA	1289	16	14	0	0	A_44_P529994	NM_001191720	7082.11	299.623	1.683333e+001	3.427064e+000	75.5	37	9.995832e+000	0	0	0	0	0	0	16.5514	1	1	43.7019	38.2
DATA	1290	16	15	0	0	A_42_P655644	NM_133618	7107.75	299.5	1.342193e+003	1.342523e+002	1331	29	9.041053e+000	0	0	0	0	0	0	1323.23	1	1	48.5334	31.6765
DATA	1291	16	16	0	0	A_42_P589674	NM_001044225	7133.19	299.338	7.969065e+003	7.969120e+002	7932	29.5	9.079222e+000	0	0	0	0	0	0	7875	1	1	46.5243	31.1471
DATA	1292	16	17	0	0	A_64_P010139	A_64_P010139	7158.6	299.823	1.671269e+002	1.697342e+001	224	28.5	7.897491e+000	0	0	0	0	0	0	165.522	1	1	50.1463	29
DATA	1293	16	18	0	0	A_42_P586883	NM_001106416	7184.42	299.573	6.652638e+001	7.280704e+000	128	30.5	7.385415e+000	0	0	0	0	0	0	66.0076	1	1	57.5363	30.8125
DATA	1294	16	19	0	0	A_42_P461144	DV724416	7209.38	299.556	2.321565e+003	2.321753e+002	2360	31	7.010724e+000	0	0	0	0	0	0	2307.04	1	1	48.2044	30.6897
DATA	1295	16	20	0	0	A_64_P130565	NM_031668	7235	299.545	3.088592e+002	3.102645e+001	381	29	7.984468e+000	0	0	0	0	0	0	307.338	1	1	55.8519	29.8
DATA	1296	16	21	0	0	A_64_P002826	NM_001134527	7260.48	299.406	1.787988e+002	1.812105e+001	242	30	5.653806e+000	0	0	0	0	0	0	178.105	1	1	47.2035	29.5862
DATA	1298	16	23	0	0	A_64_P036099	A_64_P036099	7311.31	299.521	3.113760e+003	3.113899e+002	3127	35	7.994010e+000	0	0	0	0	0	0	3106.13	1	1	48.5334	34.9143
DATA	1299	16	24	0	0	A_64_P080580	ENSRNOT00000040473	7336.5	299.5	1.075555e+003	1.075958e+002	1162	29	8.450838e+000	0	0	0	0	0	0	1073.29	1	1	49.1849	30.8
DATA	1300	16	25	0	0	A_43_P12276	NM_022636	7362	299.545	4.938742e+001	5.748092e+000	112.5	29	7.349549e+000	0	0	0	0	0	0	49.2895	1	1	55.8519	30.6111
DATA	1301	16	26	0	0	A_42_P505393	NM_199085	7387.23	299.667	4.950949e+002	4.959678e+001	554	30	9.025055e+000	0	0	0	0	0	0	494.071	1	1	49.8279	30.5806
DATA	1302	16	27	0	0	A_44_P883619	ENSRNOT00000032374	7412.58	299.573	2.952951e+000	2.942975e+000	62	27	6.719540e+000	0	0	0	0	0	0	0.645292	0	0	57.5363	27.4063
DATA	1303	16	28	0	0	A_44_P493894	ENSRNOT00000050156	7438.42	299.573	1.720958e+005	1.720958e+004	169108	36	8.675045e+000	0	0	0	0	0	0	171584	1	1	57.5363	35.5556
DATA	1304	16	29	0	0	A_64_P085334	TC585414	7463.19	299.608	1.387570e+004	1.387573e+003	13387	33	9.607151e+000	0	0	0	0	0	0	13824.2	1	1	49.1849	33.8788
DATA	1306	16	31	0	0	A_64_P045433	A_64_P045433	7514.44	299.826	5.559101e+003	5.559179e+002	5621	29.5	5.956189e+000	0	0	0	0	0	0	5526.81	1	1	47.2035	29.9286
DATA	1307	16	32	0	0	A_64_P025351	AY724474	7539.5	300	4.840687e+004	4.840688e+003	48040.5	32	8.606015e+000	0	0	0	0	0	0	48062.5	1	1	54.1152	33.2857
DATA	1308	16	33	0	0	A_44_P501626	ENSRNOT00000050744	7565.39	299.931	1.310473e+001	3.237965e+000	77.5	33	1.034469e+001	0	0	0	0	0	0	12.9907	1	0	53.8203	34.2333
DATA	1309	16	34	0	0	A_64_P071525	NM_001000141	7590.5	300	3.767896e+000	2.989835e+000	64.5	38	8.193354e+000	0	0	0	0	0	0	3.72871	1	0	54.1152	38.1481
DATA	1310	16	35	0	0	A_64_P006545	A_64_P006545	7615.48	300.084	2.490909e+004	2.490911e+003	24495.5	30	6.784369e+000	0	0	0	0	0	0	24603.8	1	1	49.8279	30.8696
DATA	1311	16	36	0	0	A_64_P089561	NM_001044265	7641.12	300.095	8.337233e+001	8.853087e+000	142	32.5	6.128971e+000	0	0	0	0	0	0	82.1764	1	1	47.5395	32.0833
DATA	1312	16	37	0	0	A_44_P791108	NM_001014070	7666.66	299.824	3.505161e+001	4.603854e+000	98	31	7.170938e+000	0	0	0	0	0	0	34.468	1	1	46.1809	32.2121
DATA	1313	16	38	0	0	A_44_P161535	A_44_P161535	7692	300	1.103320e+004	1.103324e+003	11266	32	7.085759e+000	0	0	0	0	0	0	10823.5	1	1	46.8651	31.8519
DATA	1314	16	39	0	0	A_44_P299136	NM_001108539	7717.25	300	3.495287e+002	3.508136e+001	388	32	8.242113e+000	0	0	0	0	0	0	342.002	1	1	49.1849	31.1081
DATA	1315	16	40	1028	1	(+)E1A_r60_a97	E1A_r60_a97	7742.91	299.935	3.120034e+000	3.024286e+000	66	31	8.367053e+000	0	0	0	0	0	0	3.04432	1	0	65	31.4848
DATA	1316	16	41	0	0	A_44_P161723	NM_001134526	7768.29	299.875	2.781557e+002	2.797870e+001	328	31.5	6.817286e+000	0	0	0	0	0	0	270.615	1	1	47.5395	31.3462
DATA	1317	16	42	0	0	A_64_P121443	A_64_P121443	7793.5	300	3.036992e+000	3.031028e+000	65	32	8.357401e+000	0	0	0	0	0	0	1.69254	0	0	54.1152	32.3333
DATA	1318	16	43	0	0	A_42_P771373	NM_012614	7818.5	300	1.832462e+004	1.832464e+003	16896	31	7.097668e+000	0	0	0	0	0	0	17718.8	1	1	48.5334	31.5758
DATA	1319	16	44	0	0	A_44_P1025944	NM_147140	7844	300	1.613775e+004	1.613777e+003	15371	30	6.807435e+000	0	0	0	0	0	0	15552.2	1	1	46.8651	30.8
DATA	1320	16	45	0	0	A_64_P014085	NM_001007678	7869.78	299.916	1.496022e+003	1.496335e+002	1475.5	32	7.209562e+000	0	0	0	0	0	0	1436.67	1	1	49.8279	32.7222
DATA	1321	16	46	0	0	A_64_P095298	NM_001047963	7895.23	299.773	8.018377e+001	8.585088e+000	139	30.5	6.112076e+000	0	0	0	0	0	0	76.725	1	1	45.4864	30.7667
DATA	1322	16	47	0	0	A_64_P122037	A_64_P122037	7920.63	300	2.834547e+004	2.834549e+003	26504	35	6.302756e+000	0	0	0	0	0	0	27024	1	1	50.4627	34.4839
DATA	1323	16	48	0	0	A_64_P098094	A_64_P098094	7946	300	1.017535e+005	1.017535e+004	96568	35	5.422372e+000	0	0	0	0	0	0	96641.3	1	1	54.9904	35.0714
DATA	1324	16	49	0	0	A_44_P353708	ENSRNOT00000033510	7971.15	300.136	6.674143e+001	7.359937e+000	124	32	8.717849e+000	0	0	0	0	0	0	63.1447	1	1	46.1809	32.6176
DATA	1325	16	50	0	0	A_42_P541669	ENSRNOT00000043345	7996.85	300.102	1.016135e+003	1.016612e+002	1005.5	35	9.050040e+000	0	0	0	0	0	0	957.465	1	1	52.0157	35.6452
DATA	1326	16	51	0	0	A_42_P560894	NM_019138	8021.85	300.097	5.756725e+003	5.756810e+002	5312	33	1.114631e+001	0	0	0	0	0	0	5402.4	1	1	46.8651	34.6286
DATA	1327	16	52	0	0	A_42_P498066	NM_031136	8047.5	300	8.992175e+004	8.992176e+003	84490	33	7.923017e+000	0	0	0	0	0	0	84027.2	1	1	54.1152	32.75
DATA	1328	16	53	0	0	A_42_P538928	NM_053021	8072.76	300	3.009310e+004	3.009312e+003	27474	33	9.512866e+000	0	0	0	0	0	0	28000.6	1	1	46.8651	33.8065
DATA	1329	16	54	0	0	A_64_P302169	NM_001099493	8098.29	299.912	4.244930e+001	5.297048e+000	104	29	6.381234e+000	0	0	0	0	0	0	39.3233	1	1	45.835	29.6471
DATA	1330	16	55	0	0	A_43_P18282	NM_001173436	8123.76	299.857	5.232876e+001	6.124756e+000	111.5	31	4.802298e+000	0	0	0	0	0	0	48.2585	1	1	45.1352	30.8
DATA	1331	16	56	0	0	A_44_P304169	NM_001000482	8149	299.774	3.695774e+002	3.709576e+001	412	28.5	7.877434e+000	0	0	0	0	0	0	339.295	1	1	45.4864	29.0556
DATA	1332	16	57	0	0	A_44_P318932	XM_231081	8174.35	300.205	6.273294e+003	6.273376e+002	5707	30.5	8.274696e+000	0	0	0	0	0	0	5733.52	1	1	51.0895	32.8824
DATA	1333	16	58	0	0	A_64_P124621	A_64_P124621	8200	300.455	5.201958e+001	6.121280e+000	108.5	29.5	8.659949e+000	0	0	0	0	0	0	47.3236	1	1	55.8519	31.5714
DATA	1334	16	59	0	0	A_42_P553960	NM_001107831	8225.31	300.338	1.337102e+004	1.337106e+003	11698	31	8.374817e+000	0	0	0	0	0	0	12106.8	1	1	48.5334	31.7143
DATA	1335	16	60	0	0	A_64_P129459	A_64_P129459	8250.47	300.278	7.476001e+002	7.483093e+001	740	31	8.714714e+000	0	0	0	0	0	0	673.722	1	1	48.2044	32.2903
DATA	1336	16	61	0	0	A_64_P083224	ENSRNOT00000017383	8275.83	299.828	4.050308e+001	5.207451e+000	98	28.5	7.564450e+000	0	0	0	0	0	0	36.3222	1	1	45.4864	29.5357
DATA	1337	16	62	0	0	A_64_P031840	NM_001017445	8301.38	300	1.755734e+003	1.756042e+002	1598	28	6.135378e+000	0	0	0	0	0	0	1566.92	1	1	48.5334	29
DATA	1338	16	63	0	0	A_43_P16427	NM_001191000	8327	300.455	4.095744e+001	5.262687e+000	100	32	1.060347e+001	0	0	0	0	0	0	36.3779	1	1	55.8519	33.4857
DATA	1339	16	64	0	0	A_64_P159034	NM_001191681	8352.42	300.427	3.610738e+004	3.610740e+003	31555	30	1.077347e+001	0	0	0	0	0	0	31913.1	1	1	57.5363	33.5882
DATA	1340	16	65	0	0	A_64_P009007	A_64_P009007	8377.58	300.427	5.462516e+001	6.401214e+000	109	30.5	1.001269e+001	0	0	0	0	0	0	48.0452	1	1	57.5363	32.5714
DATA	1341	16	66	0	0	A_42_P489817	NM_001107681	8403.06	300.373	7.573015e+003	7.573089e+002	6542.5	32	6.767060e+000	0	0	0	0	0	0	6627.81	1	1	45.835	32.3103
DATA	1342	16	67	0	0	A_42_P643272	NM_053389	8427.95	300.045	2.988759e+003	2.988949e+002	2601	31	8.401655e+000	0	0	0	0	0	0	2602.86	1	1	46.8651	31.3659
DATA	1343	16	68	0	0	A_64_P076063	XM_001061753	8453.92	299.797	1.188503e+002	1.235840e+001	168	31	6.233435e+000	0	0	0	0	0	0	102.975	1	1	45.835	30.4318
DATA	1344	16	69	0	0	A_64_P047371	NM_001109423	8479.21	300.045	2.661291e+003	2.661508e+002	2369	34	9.732315e+000	0	0	0	0	0	0	2294.62	1	1	45.835	31.8889
DATA	1345	16	70	0	0	A_44_P991940	XM_225667	8504.58	300.427	1.541549e+002	1.579045e+001	195.5	29.5	8.381196e+000	0	0	0	0	0	0	132.274	1	1	57.5363	31.6111
DATA	1346	16	71	0	0	A_42_P667802	ENSRNOT00000014585	8530.41	300.042	1.228769e+002	1.275966e+001	167.5	28	5.938519e+000	0	0	0	0	0	0	104.897	1	1	48.2044	29.1379
DATA	1347	16	72	0	0	A_44_P433942	A_44_P433942	8555.4	299.795	2.643999e+001	4.350727e+000	86	28	5.838093e+000	0	0	0	0	0	0	22.4608	1	1	49.5074	27.2
DATA	1348	16	73	0	0	A_42_P735279	NM_001004446	8580.6	300.147	3.108430e+004	3.108432e+003	25313	31	7.239493e+000	0	0	0	0	0	0	26280.6	1	1	48.8603	32.2222
DATA	1349	16	74	0	0	A_64_P000316	A_64_P000316	8606.52	300.29	8.940919e+001	9.597487e+000	135	32	1.160202e+001	0	0	0	0	0	0	75.2205	1	1	46.8651	34.3824
DATA	1350	16	75	0	0	A_64_P073357	XM_001070426	8631.69	300.949	1.059699e+002	1.116157e+001	148	32.5	1.124886e+001	0	0	0	0	0	0	88.7435	1	1	43.7019	34.1818
DATA	1351	16	76	0	0	A_42_P501972	NM_001025418	8657.04	300.431	5.376900e+002	5.388424e+001	502	31	7.353137e+000	0	0	0	1	0	0	448.069	1	1	48.2044	29.8529
DATA	1352	16	77	0	0	A_64_P030824	ENSRNOT00000002002	8682.39	300.594	1.090734e+002	1.146705e+001	153.5	30	6.725967e+000	0	0	0	0	0	0	90.4676	1	1	47.5395	29.6364
DATA	1353	16	78	0	0	A_42_P537715	NM_001025743	8707.74	300.264	3.260543e+003	3.260737e+002	2727.5	33	7.028618e+000	0	0	0	0	0	0	2691.45	1	1	47.5395	31.4828
DATA	1354	16	79	0	0	A_44_P596424	TC642059	8733.38	300.444	8.214225e+002	8.221989e+001	718.5	30.5	6.733345e+000	0	0	0	0	0	0	674.916	1	1	48.2044	30.8
DATA	1355	16	80	0	0	A_42_P528891	XM_001074805	8758.5	300.5	5.060526e+002	5.073233e+001	464	27	6.377042e+000	0	0	0	1	0	0	413.921	1	1	57.5363	27.8
DATA	1356	16	81	0	0	A_64_P130516	A_64_P130516	8784.11	300.5	1.089736e+002	1.147812e+001	151	27	8.057879e+000	0	0	0	0	0	0	88.7291	1	1	56.9804	29.8
DATA	1357	16	82	66	1	DarkCorner	DarkCorner	8809.84	300.395	3.634361e+000	3.621208e+000	52.5	31	8.974523e+000	0	0	0	0	0	0	-7.33048	0	0	52.3208	29.9722
DATA	1358	16	83	66	1	DarkCorner	DarkCorner	8834.59	300.841	3.649350e+000	3.636143e+000	57.5	26.5	8.299728e+000	0	0	0	0	0	0	-2.43074	0	0	51.0895	26.0789
DATA	1359	16	84	66	1	DarkCorner	DarkCorner	8860.33	300.5	3.665597e+000	3.652331e+000	57	27.5	7.763457e+000	0	0	0	0	0	0	-1.99402	0	0	57.5363	28.2667
DATA	1360	16	85	66	1	DarkCorner	DarkCorner	8885.58	300.573	3.680809e+000	3.676497e+000	61.5	26	6.518905e+000	0	0	0	0	0	0	2.05856	0	0	57.5363	26.3967
DATA	1361	17	1	66	1	DarkCorner	DarkCorner	6739.67	306.5	3.192552e+000	3.188939e+000	65	26	6.947966e+000	0	0	0	0	0	0	2.0752	0	0	57.5363	26.2228
DATA	1362	17	2	66	1	DarkCorner	DarkCorner	6764.63	306.877	3.170804e+000	3.159329e+000	57.5	31.5	4.565071e+000	0	0	0	0	0	0	-4.93258	0	0	48.5334	30.3889
DATA	1363	17	3	66	1	DarkCorner	DarkCorner	6790.58	306.573	3.150059e+000	3.138659e+000	60	32	5.852007e+000	0	0	0	0	0	0	-2.72017	0	0	57.5363	30.7647
DATA	1364	17	4	66	1	DarkCorner	DarkCorner	6816	306.545	3.130704e+000	3.119374e+000	61	29	6.364273e+000	0	0	0	0	0	0	-1.593	0	0	55.8519	28.8056
DATA	1365	17	5	0	0	A_44_P434817	NM_001012187	6841.31	306.549	4.462942e+003	4.463049e+002	4264	33	8.005912e+000	0	0	0	0	0	0	4223.87	1	1	47.8731	32.1935
DATA	1366	17	6	0	0	A_64_P153319	A_64_P153319	6866.41	306.571	1.012827e+003	1.013297e+002	1050.5	33	7.652765e+000	0	0	0	0	0	0	963.812	1	1	47.8731	30.75
DATA	1367	17	7	0	0	A_64_P034394	XM_218828	6892.42	306.573	2.591375e+001	4.016014e+000	89	31.5	6.620761e+000	0	0	0	0	0	0	24.791	1	1	57.5363	31.4
DATA	1368	17	8	0	0	A_64_P001399	A_64_P001399	6917.32	306.647	1.332617e+004	1.332620e+003	12675	37	9.746184e+000	0	0	0	0	0	0	12810	1	1	46.1809	36.8929
DATA	1369	17	9	0	0	A_42_P712191	NM_001109207	6943	306.545	2.710783e+002	2.727770e+001	314.5	33	7.497647e+000	0	0	0	0	0	0	261.776	1	1	55.8519	33.2973
DATA	1370	17	10	0	0	A_44_P746633	NM_001109580	6968.16	306.863	2.424906e+004	2.424908e+003	22829.5	32	7.924478e+000	0	0	0	0	0	0	23517.5	1	1	47.5395	30.7879
DATA	1371	17	11	0	0	A_42_P772157	NM_017020	6993.58	306.878	1.223552e+003	1.223923e+002	1256	28	7.535139e+000	0	0	0	1	0	0	1191.34	1	1	48.5334	28.7241
DATA	1372	17	12	0	0	A_44_P407543	NM_001024996	7019.2	307.127	1.700035e+002	1.726359e+001	223.5	31.5	8.301222e+000	0	0	0	0	0	0	166.148	1	1	46.8651	32.1563
DATA	1374	17	14	0	0	A_64_P057225	NM_001008857	7070	306.545	1.645413e+002	1.672260e+001	225	29	8.780717e+000	0	0	0	0	0	0	161.823	1	1	55.8519	32.6207
DATA	1375	17	15	0	0	A_42_P462015	NM_001011943	7095	306.809	6.198682e+002	6.205822e+001	686	31	9.775704e+000	0	0	0	0	0	0	611.338	1	1	46.8651	34.2424
DATA	1376	17	16	0	0	A_42_P596050	NM_053572	7120.56	306.973	6.163804e+002	6.170948e+001	661.5	28	8.654279e+000	0	0	0	0	0	0	609.457	1	1	48.5334	30
DATA	1377	17	17	0	0	A_44_P213776	NM_052829	7145.93	306.806	1.030713e+002	1.072429e+001	167.5	32	8.777351e+000	0	0	0	0	0	0	102.137	1	1	46.8651	33.4412
DATA	1378	17	18	0	0	A_64_P004468	A_64_P004468	7171.27	306.887	5.879163e+003	5.879238e+002	5913	31	7.518286e+000	0	0	0	0	0	0	5837.43	1	1	44.7812	31.1034
DATA	1379	17	19	0	0	A_44_P290394	NM_053580	7196.8	306.976	3.973698e+003	3.973807e+002	4009.5	33	6.787085e+000	0	0	0	0	0	0	3952.32	1	1	49.5074	33.25
DATA	1380	17	20	0	0	A_64_P076911	XM_215948	7222.5	307	7.057737e+001	7.648189e+000	134	33	8.851147e+000	0	0	0	0	0	0	70.3004	1	1	54.1152	33.0303
DATA	1381	17	21	0	0	A_64_P155895	NM_001009658	7247.57	306.843	3.515206e+003	3.515330e+002	3497	29	6.360971e+000	0	0	0	0	0	0	3505.4	1	1	47.5395	29.125
DATA	1382	17	22	0	0	A_43_P16338	ENSRNOT00000034555	7272.73	306.836	7.351343e+001	7.917673e+000	134	29	6.324555e+000	0	0	0	0	0	0	73.3765	1	1	48.2044	29.5
DATA	1383	17	23	0	0	A_42_P716283	NM_001107983	7298.29	306.754	1.304615e+003	1.304946e+002	1341.5	32	5.994621e+000	0	0	0	0	0	0	1303.08	1	1	45.1352	32.25
DATA	1384	17	24	0	0	A_43_P13355	NM_139082	7323.91	306.935	2.070744e+002	2.091471e+001	266	31	7.325810e+000	0	0	0	0	0	0	206.934	1	1	54.4085	32.1034
DATA	1385	17	25	0	0	A_64_P126065	NM_001005900	7349.09	307.087	9.639726e+001	1.007704e+001	160	31	7.477895e+000	0	0	0	0	0	0	96.3561	1	1	46.8651	32.5676
DATA	1386	17	26	0	0	A_44_P838532	NM_001107144	7374.72	307.118	1.361696e+003	1.362012e+002	1427.5	29	8.352837e+000	0	0	0	0	0	0	1361.12	1	1	48.8603	30.3548
DATA	1387	17	27	0	0	A_42_P785861	NM_001009422	7399.79	307.194	5.461748e+003	5.461827e+002	5407	29	7.569621e+000	0	0	0	0	0	0	5458.28	1	1	47.5395	29.2286
DATA	1388	17	28	0	0	A_42_P641962	NM_012999	7425.47	307.301	4.286589e+003	4.286690e+002	4230	30	8.392479e+000	0	0	0	0	0	0	4282.02	1	1	47.8731	31.0606
DATA	1389	17	29	0	0	A_64_P085201	TC633318	7450.61	307.069	2.092351e+002	2.112910e+001	274.5	35.5	7.903184e+000	0	0	0	0	0	0	208.865	1	1	65	35.3571
DATA	1390	17	30	0	0	A_64_P015687	NM_053573	7476.17	307	5.824525e+003	5.824599e+002	5690	30.5	8.473067e+000	0	0	0	0	0	0	5809.07	1	1	46.8651	32.9167
DATA	1391	17	31	0	0	A_64_P078332	NM_012794	7501.5	307	3.957827e+001	4.933960e+000	101	29	3.725360e+000	0	0	0	0	0	0	39.4311	1	1	54.1152	28.7857
DATA	1392	17	32	0	0	A_42_P637189	NM_031612	7526.63	307	8.358767e+003	8.358819e+002	8090	31	6.151548e+000	0	0	0	0	0	0	8317.22	1	1	48.5334	30.1923
DATA	1393	17	33	0	0	A_42_P602472	NM_001008290	7551.79	307.194	4.124687e+003	4.124793e+002	4073	34	1.079949e+001	0	0	0	0	0	0	4098.41	1	1	47.5395	35.2821
DATA	1394	17	34	0	0	A_64_P003749	NM_031799	7577.44	307.1	1.180306e+002	1.216830e+001	182	34	1.088146e+001	0	0	0	0	0	0	117.081	1	1	47.8731	35.5357
DATA	1395	17	35	0	0	A_42_P785861	NM_001009422	7602.87	307.1	5.477365e+003	5.477445e+002	5345	35	8.623826e+000	0	0	0	0	0	0	5423.34	1	1	46.8651	34.7037
DATA	1396	17	36	0	0	A_64_P138889	NM_001013050	7628.16	307.103	5.647084e+003	5.647162e+002	5550.5	32	8.295179e+000	0	0	0	0	0	0	5580.21	1	1	46.5243	32.32
DATA	1397	17	37	0	0	A_44_P409820	NM_012908	7654.09	307.065	6.842633e+001	7.462177e+000	130.5	33	6.068655e+000	0	0	0	0	0	0	67.4647	1	1	54.4085	32.2286
DATA	1398	17	38	0	0	A_44_P529880	ENSRNOT00000033370	7679.44	307.123	2.994794e+000	2.983955e+000	59.5	32	6.244542e+000	0	0	0	0	0	0	-3.66503	0	0	48.5334	31.0741
DATA	1399	17	39	0	0	A_64_P084851	ENSRNOT00000029593	7704.53	307.076	1.294418e+002	1.328534e+001	186	33	8.185242e+000	0	0	0	0	0	0	127.007	1	1	45.1352	33.2917
DATA	1400	17	40	0	0	A_44_P654068	NM_001114402	7729.88	307.236	6.072268e+002	6.079671e+001	636	30	8.547719e+000	0	0	0	0	0	0	594.24	1	1	47.8731	31.0313
DATA	1401	17	41	0	0	A_64_P094855	NM_001109591	7755.32	307.378	2.461730e+003	2.461914e+002	2460	31	7.936602e+000	0	0	0	0	0	0	2402.34	1	1	51.0895	30.9
DATA	1402	17	42	0	0	A_42_P516658	NM_001024888	7780.82	307.351	2.180086e+002	2.200859e+001	273	34	7.699134e+000	0	0	0	0	0	0	212.114	1	1	48.8603	32.88
DATA	1403	17	43	0	0	A_64_P092394	ENSRNOT00000064749	7806.42	307.427	2.652270e+001	4.023941e+000	89	29.5	8.625277e+000	0	0	0	0	0	0	25.7252	1	1	57.5363	31.8667
DATA	1404	17	44	0	0	A_44_P280755	NM_148890	7831.58	307.427	5.622793e+001	6.390034e+000	119	33	6.685193e+000	0	0	0	0	0	0	54.3618	1	1	57.5363	31.6071
DATA	1405	17	45	0	0	A_42_P629062	AF072835	7856.71	306.833	7.437566e+002	7.443803e+001	742	30	8.652294e+000	0	0	0	0	0	0	716.582	1	1	45.835	31.2927
DATA	1406	17	46	0	0	A_64_P131141	ENSRNOT00000012638	7882.51	306.862	5.724440e+001	6.489712e+000	119	31.5	7.452826e+000	0	0	0	0	0	0	54.9571	1	1	45.1352	32.2308
DATA	1407	17	47	0	0	A_42_P756350	NM_021772	7908	307.455	9.745871e+001	1.021739e+001	158.5	33	6.650087e+000	0	0	0	0	0	0	93.2362	1	1	55.8519	32.0968
DATA	1408	17	48	66	-1	(-)3xSLv1	NegativeControl	7933.42	307.427	3.090801e+000	3.079615e+000	56	34	6.270934e+000	0	0	0	0	0	0	-5.5146	0	0	57.5363	34.7308
DATA	1409	17	49	0	0	A_64_P124796	A_64_P124796	7958.58	307.427	3.465316e+001	4.643829e+000	96	35	7.254275e+000	0	0	0	0	0	0	32.9017	1	1	57.5363	35.4783
DATA	1410	17	50	0	0	A_44_P288443	NM_001108878	7983.74	307.222	8.649579e+002	8.655145e+001	881	31	6.745294e+000	0	0	0	0	0	0	817.992	1	1	47.5395	31.2813
DATA	1411	17	51	0	0	A_42_P748004	NM_001135873	8009.32	307.605	2.032039e+003	2.032278e+002	1903	35.5	1.095220e+001	0	0	0	0	0	0	1914.03	1	1	49.5074	36.2813
DATA	1412	17	52	0	0	A_64_P067310	NM_001139507	8034.89	307.5	1.669089e+003	1.669382e+002	1633	32.5	7.860105e+000	0	0	0	0	0	0	1565.56	1	1	56.9804	32.3438
DATA	1413	17	53	0	0	A_44_P210809	NM_001107334	8060.42	307.427	1.503079e+002	1.535582e+001	200	33	4.592748e+000	0	0	0	0	0	0	140.383	1	1	57.5363	32.52
DATA	1414	17	54	1028	1	(+)E1A_r60_a104	E1A_r60_a104	8085.58	307.427	3.167631e+000	3.156167e+000	61	28.5	4.584157e+000	0	0	0	0	0	0	-0.477659	0	0	65	28.8333
DATA	1415	17	55	0	0	A_44_P1042711	NM_001108426	8111.11	307.5	1.393522e+002	1.429126e+001	192.5	31	6.847342e+000	0	0	0	0	0	0	129.024	1	1	56.9804	31.7813
DATA	1416	17	56	0	0	A_42_P661992	TC596141	8136.5	307.5	6.606941e+002	6.614610e+001	678	31	6.603691e+000	0	0	0	1	0	0	608.993	1	1	57.5363	31.8611
DATA	1417	17	57	0	0	A_42_P565621	NM_001105971	8161.89	307.5	1.278564e+002	1.317973e+001	180.5	29	9.154939e+000	0	0	0	0	0	0	117.317	1	1	56.9804	30.7097
DATA	1418	17	58	0	0	A_44_P264600	NM_001013132	8187.31	307.535	1.973439e+002	1.999433e+001	249.5	30.5	9.350891e+000	0	0	0	0	0	0	180.246	1	1	47.8731	31.5714
DATA	1419	17	59	0	0	A_64_P034901	TC591400	8212.58	307.427	9.592400e+000	3.368095e+000	71	27	7.777532e+000	0	0	0	0	0	0	8.72052	1	0	57.5363	29.36
DATA	1420	17	60	0	0	A_42_P468216	NM_001030026	8237.64	307.373	3.754238e+003	3.754378e+002	3321	32.5	8.717278e+000	0	0	0	1	0	0	3397.12	1	1	48.8603	32.5938
DATA	1421	17	61	0	0	A_64_P062855	XM_343708	8263.5	307.5	2.481588e+001	4.096550e+000	86	32	8.653018e+000	0	0	0	0	0	0	22.3474	1	1	57.5363	33.2333
DATA	1422	17	62	0	0	A_64_P048421	AABR03055399	8288.69	307.591	3.286744e+000	3.277753e+000	60	28	4.223893e+000	0	0	0	0	0	0	1.23636	0	0	52.3208	28.2857
DATA	1423	17	63	0	0	A_44_P342166	NM_013187	8314.33	307.5	1.828480e+002	1.857860e+001	225	28.5	8.098381e+000	0	0	0	0	0	0	163.08	1	1	57.5363	30.1471
DATA	1424	17	64	0	0	A_42_P748154	XM_001059949	8339.44	307.521	5.054715e+003	5.054824e+002	4503	30.5	1.047279e+001	0	0	0	0	0	0	4486.63	1	1	48.2044	32.9
DATA	1425	17	65	0	0	A_64_P157763	A_64_P157763	8365.11	307.5	1.775313e+003	1.775624e+002	1598	28.5	1.015110e+001	0	0	0	0	0	0	1568.01	1	1	56.9804	32.3
DATA	1426	17	66	0	0	A_64_P155645	NM_022706	8390.32	307.605	1.192840e+004	1.192845e+003	10164	31.5	7.047050e+000	0	0	0	0	0	0	10484.6	1	1	49.5074	31.1667
DATA	1427	17	67	0	0	A_42_P622436	NM_022298	8415.67	307.5	9.936674e+004	9.936674e+003	87587.5	35	1.007190e+001	0	0	0	0	0	0	86909.2	1	1	57.5363	35.4643
DATA	1428	17	68	0	0	A_44_P304190	NM_001014044	8440.97	307.864	1.616753e+002	1.651544e+001	205	30	6.008086e+000	0	0	0	0	0	0	140.727	1	1	46.5243	29.7609
DATA	1429	17	69	1028	1	(+)E1A_r60_a104	E1A_r60_a104	8467.3	307.4	3.402085e+000	3.393262e+000	63	30.5	6.641562e+000	0	0	0	0	0	0	1.33211	0	0	47.5395	30.6
DATA	1430	17	70	0	0	A_42_P771373	NM_012614	8491.69	307.338	1.717351e+004	1.717355e+003	15037	32	9.782096e+000	0	0	0	1	0	0	14799.8	1	1	48.5334	32.4242
DATA	1431	17	71	0	0	A_64_P101976	A_64_P101976	8517.43	307.657	2.542738e+001	4.263810e+000	86	27	4.868596e+000	0	0	0	0	0	0	21.8057	1	1	46.5243	27.3548
DATA	1432	17	72	0	0	A_42_P777935	ENSRNOT00000027369	8542.57	307.429	2.959724e+002	2.979642e+001	307.5	29	6.535922e+000	0	0	0	0	0	0	252.571	1	1	45.1352	29.4194
DATA	1433	17	73	0	0	A_64_P041521	NM_012945	8568.42	307.573	1.871571e+002	1.903222e+001	220	29	6.148363e+000	0	0	0	0	0	0	158.926	1	1	57.5363	27.4348
DATA	1434	17	74	0	0	A_44_P102661	NM_138862	8593.15	307.581	2.319465e+003	2.319725e+002	1997	33	1.366008e+001	0	0	0	0	0	0	1960.3	1	1	48.5334	37.7419
DATA	1435	17	75	0	0	A_42_P714166	NM_001017491	8619	307.545	5.797107e+000	3.537897e+000	66	33	1.852583e+001	0	0	0	0	0	0	4.87536	1	0	55.8519	37.8387
DATA	1436	17	76	0	0	A_64_P098703	NM_198728	8644.36	307.87	9.757735e+002	9.764033e+001	903	31	9.574271e+000	0	0	0	0	0	0	816.779	1	1	46.8651	33
DATA	1437	17	77	0	0	A_44_P624151	NM_001107932	8669.61	307.594	1.033810e+003	1.034410e+002	905	31	6.471236e+000	0	0	0	0	0	0	861.216	1	1	47.5395	29.2424
DATA	1438	17	78	0	0	A_42_P674843	NM_001008880	8694.99	307.771	1.005717e+003	1.006340e+002	878	28	7.242551e+000	0	0	0	0	0	0	833.926	1	1	46.8651	30.2727
DATA	1439	17	79	0	0	A_44_P1039634	NM_001108924	8720.58	307.573	1.312566e+002	1.359900e+001	170.5	30	7.644188e+000	0	0	0	0	0	0	108.321	1	1	57.5363	30.4857
DATA	1440	17	80	0	0	A_42_P517253	NM_001012275	8746	307.545	4.560750e+002	4.574725e+001	433.5	30	6.446063e+000	0	0	0	1	0	0	374.653	1	1	55.8519	29.1379
DATA	1441	17	81	0	0	A_42_P485589	NM_017246	8771.32	307.8	1.320238e+002	1.368149e+001	162	27	7.381474e+000	0	0	0	0	0	0	107.973	1	1	49.5074	28.6154
DATA	1442	17	82	66	1	DarkCorner	DarkCorner	8796.58	307.573	3.618218e+000	3.605123e+000	58	31	8.624725e+000	0	0	0	0	0	0	-3.87761	0	0	57.5363	31.0541
DATA	1443	17	83	66	1	DarkCorner	DarkCorner	8822.56	308.07	3.633922e+000	3.620771e+000	56	31	8.856588e+000	0	0	0	0	0	0	-3.24299	0	0	50.7771	29.0714
DATA	1444	17	84	66	1	DarkCorner	DarkCorner	8848.12	308.338	3.649372e+000	3.636165e+000	57	28	7.389864e+000	0	0	0	0	0	0	-3.58657	0	0	48.8603	27.0857
DATA	1445	17	85	66	1	DarkCorner	DarkCorner	8872.91	307.614	3.665213e+000	3.653583e+000	60.5	27	8.040598e+000	0	0	0	0	0	0	0.878424	0	0	57.259	28.7317
DATA	1446	18	1	66	1	DarkCorner	DarkCorner	6752.57	314	3.174728e+000	3.163239e+000	62.5	30	7.462418e+000	0	0	0	0	0	0	-2.01427	0	0	49.8279	31.0811
DATA	1447	18	2	66	1	DarkCorner	DarkCorner	6777.56	314.062	3.154010e+000	3.144480e+000	65	32	5.942028e+000	0	0	0	0	0	0	1.0166	0	0	49.8279	31
DATA	1448	18	3	66	1	DarkCorner	DarkCorner	6803.01	313.825	3.134345e+000	3.123002e+000	56	27.5	6.679690e+000	0	0	0	0	0	0	-5.96387	0	0	48.8603	28.6944
DATA	1449	18	4	0	0	A_42_P608713	TC595074	6828.27	314.219	7.856522e+002	7.862652e+001	776.5	31	9.280231e+000	0	0	0	0	0	0	742.87	1	1	48.2044	32.3714
DATA	1450	18	5	0	0	A_44_P411771	XM_001056376	6853.85	314.097	8.290674e+002	8.296418e+001	843	33	7.731644e+000	0	0	0	0	0	0	788.362	1	1	46.8651	30.7241
DATA	1451	18	6	0	0	A_42_P703647	NM_001108688	6879.32	314.111	2.693384e+001	4.084224e+000	87	31	6.262869e+000	0	0	0	0	0	0	25.7485	1	1	47.8731	31.2
DATA	1452	18	7	0	0	A_64_P139212	NM_001030052	6904.76	314.023	3.617661e+004	3.617663e+003	34499	35	9.626353e+000	0	0	0	0	0	0	34757.3	1	1	51.0895	37
DATA	1453	18	8	0	0	A_64_P082461	FQ211879	6930	314.313	1.442000e+002	1.473708e+001	198	33	8.938545e+000	0	0	0	0	0	0	139.199	1	1	45.4864	34.3158
DATA	1454	18	9	0	0	A_64_P144053	NM_001108100	6955.65	314.212	4.124201e+002	4.135297e+001	453	31	6.996832e+000	0	0	0	0	0	0	399.871	1	1	50.4627	30.7931
DATA	1455	18	10	0	0	A_42_P455802	NM_001013929	6980.77	314.247	3.683636e+003	3.683760e+002	3514	29	8.993158e+000	0	0	0	0	0	0	3586	1	1	49.5074	30.4242
DATA	1456	18	11	0	0	A_44_P575367	ENSRNOT00000068160	7006.5	314.352	4.084296e+000	3.031136e+000	66.5	30	7.812039e+000	0	0	0	0	0	0	3.99136	1	0	65	30.1935
DATA	1457	18	12	0	0	A_64_P008259	ENSRNOT00000040453	7031.6	314.156	3.172534e+003	3.172675e+002	3190.5	31	7.887791e+000	0	0	0	0	0	0	3110.88	1	1	49.8279	30.7
DATA	1458	18	13	0	0	A_44_P433935	NM_001024894	7056.93	314.014	1.404163e+001	3.297785e+000	76	28	8.011546e+000	0	0	0	0	0	0	13.8122	1	0	46.8651	30.8571
DATA	1459	18	14	0	0	A_64_P027747	TC585156	7082.35	314.205	1.121444e+004	1.121448e+003	10751	31	8.457611e+000	0	0	0	0	0	0	11063.8	1	1	51.0895	32.7419
DATA	1460	18	15	0	0	A_44_P247880	ENSRNOT00000032333	7108	314.455	1.124558e+001	3.173028e+000	73.5	30	8.472645e+000	0	0	0	0	0	0	11.1246	1	0	55.8519	32
DATA	1461	18	16	0	0	A_44_P422321	NM_001105813	7133.06	314.232	2.799983e+003	2.800140e+002	2811.5	29.5	8.497719e+000	0	0	0	0	0	0	2776.16	1	1	46.5243	30.9706
DATA	1462	18	17	0	0	A_44_P374824	ENSRNOT00000025777	7158.58	314.427	4.167338e+001	5.108127e+000	106	29	8.604043e+000	0	0	0	0	0	0	41.4072	1	1	57.5363	30.6207
DATA	1463	18	18	0	0	A_64_P029482	A_64_P029482	7184.42	314.427	6.135054e+001	6.806834e+000	122	32	7.799336e+000	0	0	0	0	0	0	61.0712	1	1	57.5363	32.4063
DATA	1464	18	19	0	0	A_64_P083918	NM_053396	7209.43	314.392	1.916875e+001	3.513127e+000	80	34	5.603043e+000	0	0	0	0	0	0	19.1106	1	1	49.1849	32.5862
DATA	1465	18	20	1028	1	(+)E1A_r60_3	E1A_r60_3	7235	314.455	3.801259e+001	4.805656e+000	98.5	28.5	5.907018e+000	0	0	0	0	0	0	37.9474	1	1	55.8519	28.1786
DATA	1466	18	21	0	0	A_42_P508415	CV108834	7260.37	314.288	2.000380e+002	2.021829e+001	260	32	8.570791e+000	0	0	0	0	0	0	199.897	1	1	48.5334	32.4615
DATA	1467	18	22	0	0	A_64_P018331	NM_001107720	7285.72	314.16	2.683955e+003	2.684116e+002	2722	31	6.939266e+000	0	0	0	0	0	0	2684.15	1	1	49.1849	31.1818
DATA	1468	18	23	0	0	A_64_P142056	NM_001011938	7311.13	314.243	1.275380e+004	1.275383e+003	12884	33	7.215575e+000	0	0	0	0	0	0	12762.2	1	1	46.5243	32.75
DATA	1469	18	24	0	0	A_44_P1030098	NM_001105866	7336.45	314.324	2.793361e+002	2.808709e+001	337.5	30	9.011163e+000	0	0	0	0	0	0	279.616	1	1	47.8731	31.6429
DATA	1470	18	25	0	0	A_64_P125958	NM_177933	7362	314.455	4.026843e+001	4.981080e+000	104	29	6.934386e+000	0	0	0	0	0	0	40.3139	1	1	55.8519	30.1667
DATA	1471	18	26	0	0	A_64_P002066	XM_001056138	7387.5	314.5	6.858917e+001	7.459387e+000	131	34	1.175008e+001	0	0	0	0	0	0	68.6585	1	1	57.5363	33.4242
DATA	1472	18	27	0	0	A_42_P521242	ENSRNOT00000003841	7412.57	314.608	6.560476e+002	6.567029e+001	718	30.5	6.350020e+000	0	0	0	0	0	0	656.501	1	1	49.1849	29.2143
DATA	1473	18	28	0	0	A_42_P652827	NM_001024274	7437.69	314.662	4.916937e+003	4.917024e+002	4842	35.5	9.342094e+000	0	0	0	0	0	0	4917.67	1	1	48.5334	34.6333
DATA	1474	18	29	0	0	A_42_P533792	NM_001106575	7463.3	314.1	1.378781e+004	1.378784e+003	13479	34	8.300250e+000	0	0	0	0	0	0	13777.6	1	1	47.2035	33.4063
DATA	1475	18	30	1028	1	(+)E1A_r60_1	E1A_r60_1	7488.89	314.5	2.950650e+000	2.939971e+000	63	30	8.250101e+000	0	0	0	0	0	0	-0.0714124	0	0	65	32.2353
DATA	1476	18	31	0	0	A_64_P210103	NM_001100666	7514.5	314.5	2.627687e+002	2.644121e+001	326	29	4.132610e+000	0	0	0	0	0	0	262.027	1	1	57.5363	29.0385
DATA	1477	18	32	0	0	A_64_P131745	A_64_P131745	7539.97	314.284	5.785821e+001	6.493406e+000	123	27	5.571081e+000	0	0	0	0	0	0	57.613	1	1	45.835	29.4138
DATA	1478	18	33	0	0	A_64_P017791	XM_002727063	7565.56	314.522	1.260383e+001	3.209945e+000	76	31	8.067259e+000	0	0	0	0	0	0	12.5313	1	0	46.8651	30.9143
DATA	1479	18	34	0	0	A_42_P560288	NM_198788	7590.12	314.616	1.621658e+004	1.621661e+003	15619.5	32	7.223923e+000	0	0	0	0	0	0	16096.3	1	1	48.5334	33.4333
DATA	1480	18	35	0	0	A_42_P571463	NM_001013221	7615.89	314.5	2.538343e+003	2.538515e+002	2557	31	7.028743e+000	0	0	0	0	0	0	2514.55	1	1	56.9804	31.625
DATA	1481	18	36	0	0	A_42_P648207	NM_001013882	7640.81	314.608	8.957354e+002	8.962273e+001	915	29	5.993239e+000	0	0	0	0	0	0	885.534	1	1	49.1849	30.5676
DATA	1482	18	37	0	0	A_64_P120833	NM_131910	7666.31	314.338	1.527915e+004	1.527918e+003	14506	31	5.228129e+000	0	0	0	0	0	0	15070	1	1	48.5334	31.2222
DATA	1483	18	38	0	0	A_42_P705337	TC582694	7691.72	314.2	3.719087e+003	3.719207e+002	3642	33	5.810921e+000	0	0	0	0	0	0	3659.16	1	1	49.1849	31.6957
DATA	1484	18	39	0	0	A_44_P544340	NM_001034939	7717.32	314.395	6.621929e+002	6.628680e+001	695	31	9.151408e+000	0	0	0	0	0	0	649.851	1	1	49.5074	32.1
DATA	1486	18	41	0	0	A_44_P310596	NM_001014166	7768.06	314.481	9.100498e+002	9.105467e+001	920.5	32	8.798827e+000	0	0	0	0	0	0	888.087	1	1	49.5074	31.5
DATA	1487	18	42	0	0	A_64_P013409	A_64_P013409	7793.5	314.571	4.439160e+000	3.049329e+000	66	29	5.410763e+000	0	0	0	0	0	0	4.31895	1	0	51.7088	29.7407
DATA	1488	18	43	0	0	A_64_P076485	A_64_P076485	7818.95	314.603	2.251094e+003	2.251298e+002	2257	30.5	6.534956e+000	0	0	0	0	0	0	2183.19	1	1	49.5074	30.9375
DATA	1489	18	44	0	0	A_64_P096121	ENSRNOT00000028891	7843.68	314.887	6.072241e+001	6.788927e+000	122	28.5	7.496609e+000	0	0	0	0	0	0	58.705	1	1	44.7812	28.7368
DATA	1490	18	45	0	0	A_42_P521086	NM_001100857	7869.81	314.514	6.193063e+001	6.902049e+000	122	27.5	6.660712e+000	0	0	0	0	0	0	59.6572	1	1	47.2035	28.9286
DATA	1491	18	46	0	0	A_64_P143133	TC637520	7895.35	314.405	2.121215e+001	3.721685e+000	82	27	5.166460e+000	0	0	0	0	0	0	20.36	1	1	48.5334	28.3333
DATA	1492	18	47	0	0	A_64_P067163	NM_017248	7920.58	314.573	6.678734e+004	6.678735e+003	63339	34.5	7.217074e+000	0	0	0	0	0	0	63872.7	1	1	57.5363	34.6154
DATA	1493	18	48	0	0	A_64_P118288	NM_053448	7945.79	314.757	4.352556e+002	4.363444e+001	476	34	1.009560e+001	0	0	0	0	0	0	414.715	1	1	46.8651	35.7241
DATA	1494	18	49	0	0	A_64_P112342	A_64_P112342	7971.5	314.648	4.992244e+001	5.872627e+000	106	34	6.421119e+000	0	0	0	0	0	0	47.3782	1	1	65	33.3333
DATA	1495	18	50	0	0	A_64_P074741	NM_001077680	7996.58	314.573	7.796192e+001	8.391782e+000	136	32	6.439946e+000	0	0	0	0	0	0	73.6959	1	1	57.5363	32.5172
DATA	1496	18	51	0	0	A_64_P153062	NM_001107890	8022.1	314.57	2.745166e+002	2.762815e+001	324	32.5	1.127820e+001	0	0	0	0	0	0	258.43	1	1	50.1463	34.1176
DATA	1497	18	52	0	0	A_64_P051942	A_64_P051942	8047.59	314.958	3.823623e+002	3.836419e+001	421.5	33	7.848361e+000	0	0	0	0	0	0	358.478	1	1	48.2044	33.375
DATA	1498	18	53	0	0	A_44_P233080	ENSRNOT00000026303	8072.99	314.609	7.225140e+003	7.225208e+002	6590	32	7.111705e+000	0	0	0	0	0	0	6744.43	1	1	46.8651	32.1724
DATA	1499	18	54	0	0	A_64_P127747	A_64_P127747	8098.5	314.648	9.260200e+001	9.783911e+000	143	29.5	6.748789e+000	0	0	0	0	0	0	86.0646	1	1	57.5363	30.1154
DATA	1500	18	55	0	0	A_42_P773155	NM_001106996	8123.61	314.931	4.606722e+004	4.606723e+003	42042	32	8.050245e+000	0	0	0	0	0	0	42630.8	1	1	53.8203	32.8387
DATA	1501	18	56	0	0	A_64_P003624	NM_175591	8149.07	314.426	5.678408e+001	6.511354e+000	115	30	7.258956e+000	0	0	0	0	0	0	52.3059	1	1	45.4864	30.1143
DATA	1502	18	57	0	0	A_64_P148728	NM_030989	8174.66	314.909	5.256539e+002	5.266275e+001	548	31	9.149417e+000	0	0	0	0	0	0	482.033	1	1	49.1849	30.6129
DATA	1503	18	58	0	0	A_44_P436284	ENSRNOT00000031389	8199.41	314.959	3.497803e+002	3.512549e+001	375.5	27	1.014349e+001	0	0	0	0	0	0	319.317	1	1	48.5334	30.9032
DATA	1504	18	59	0	0	A_42_P626851	NM_001107917	8225.22	314.89	1.462962e+003	1.463318e+002	1334.5	31	7.637626e+000	0	0	0	0	0	0	1329.2	1	1	47.8731	30.7778
DATA	1505	18	60	0	0	A_42_P797303	TC587453	8250.5	315	2.414000e+004	2.414002e+003	21409	34.5	5.865670e+000	0	0	0	0	0	0	21830.6	1	1	48.5334	34.4643
DATA	1506	18	61	0	0	A_64_P096312	A_64_P096312	8275.72	314.754	4.521135e+003	4.521252e+002	4168	28	6.036428e+000	0	0	0	0	0	0	4069.09	1	1	42.2201	29.0385
DATA	1507	18	62	0	0	A_64_P150894	A_64_P150894	8301.64	314.87	5.334230e+002	5.344287e+001	539.5	29.5	6.667857e+000	0	0	0	0	0	0	477.755	1	1	46.8651	30.6429
DATA	1508	18	63	0	0	A_64_P241372	NM_001000593	8327	315	3.860674e+001	5.074253e+000	96	28.5	9.263558e+000	0	0	0	0	0	0	34.4123	1	1	54.9904	30.8438
DATA	1509	18	64	0	0	A_44_P433621	NM_001025016	8352.09	314.896	5.676711e+002	5.686346e+001	569	28	8.453675e+000	0	0	0	0	0	0	503.561	1	1	46.8651	30.2308
DATA	1510	18	65	0	0	A_64_P163511	NM_013190	8377.59	314.908	1.829615e+003	1.829917e+002	1661	29	7.937564e+000	0	0	0	0	0	0	1615.06	1	1	49.1849	30.1724
DATA	1511	18	66	0	0	A_44_P129412	AF155959	8402.9	314.753	2.597959e+003	2.598174e+002	2258	31.5	1.226545e+001	0	0	0	0	0	0	2282.04	1	1	47.5395	35.2
DATA	1512	18	67	0	0	A_64_P143037	NM_001025134	8428.24	315	5.466957e+002	5.477259e+001	530	35	8.817386e+000	0	0	0	0	0	0	477.901	1	1	46.8651	34.2051
DATA	1513	18	68	0	0	A_64_P032693	XM_002724830	8454.27	315.077	2.174541e+001	4.014499e+000	82	30	5.454838e+000	0	0	0	0	0	0	18.914	1	1	49.1849	29.5405
DATA	1514	18	69	0	0	A_42_P727368	NM_001025693	8479.5	315	9.954187e+001	1.051596e+001	145	33	8.975608e+000	0	0	0	0	0	0	86.1576	1	1	54.1152	33.8077
DATA	1515	18	70	0	0	A_64_P075765	A_64_P075765	8504.5	315	1.863654e+001	3.883871e+000	77	27	7.311502e+000	0	0	0	0	0	0	16.053	1	1	54.1152	28.4839
DATA	1516	18	71	0	0	A_42_P639174	NM_001106592	8530.31	314.986	2.377424e+003	2.377670e+002	2049	27	5.852855e+000	0	0	0	0	0	0	2037.68	1	1	47.2035	27.4516
DATA	1517	18	72	0	0	A_64_P063135	NM_001109623	8555.85	315.015	1.143979e+002	1.194619e+001	164.5	28	6.711732e+000	0	0	0	0	0	0	97.5713	1	1	46.8651	28.2121
DATA	1518	18	73	0	0	A_64_P018236	NM_001108882	8580.91	315.065	3.470357e+000	3.458834e+000	62	29	7.726179e+000	0	0	0	0	0	0	0.718848	0	0	54.4085	30.0417
DATA	1519	18	74	0	0	A_43_P14648	NM_001012034	8606.1	314.986	2.207111e+003	2.207385e+002	1844	34	1.215288e+001	0	0	0	0	0	0	1864.52	1	1	46.8651	36.6857
DATA	1520	18	75	0	0	A_42_P698520	NM_001108216	8631.5	315	1.216675e+004	1.216680e+003	10076.5	29	6.898067e+000	0	0	0	0	0	0	10229.1	1	1	48.5334	30.8
DATA	1521	18	76	0	0	A_43_P19450	NM_001105713	8656.9	315.027	1.810025e+002	1.843701e+001	213	31	6.590337e+000	0	0	0	0	0	0	151.456	1	1	46.8651	29.6071
DATA	1522	18	77	0	0	A_64_P013012	XM_225619	8682.57	314.973	7.491978e+002	7.500264e+001	683.5	31	6.793212e+000	0	0	0	0	0	0	623.918	1	1	49.1849	30.0909
DATA	1523	18	78	0	0	A_42_P499684	NM_001108642	8707.78	314.846	7.672955e+002	7.681122e+001	685.5	27	7.253165e+000	0	0	0	1	0	0	636.02	1	1	45.835	28.7429
DATA	1524	18	79	0	0	A_64_P297479	ENSRNOT00000044350	8733.42	315.427	3.753015e+004	3.753017e+003	31812	30	6.665107e+000	0	0	0	0	0	0	30970.3	1	1	57.5363	29.0968
DATA	1525	18	80	0	0	A_64_P103238	NM_001014158	8758.57	314.761	6.210158e+002	6.220432e+001	560	27	6.935749e+000	0	0	0	0	0	0	510.073	1	1	46.5243	28.7692
DATA	1526	18	81	0	0	A_42_P751562	NM_001037355	8783.85	315.288	6.187378e+003	6.187482e+002	4987	30.5	1.115121e+001	0	0	0	0	0	0	5060.24	1	1	48.2044	32.1176
DATA	1527	18	82	66	1	DarkCorner	DarkCorner	8809.5	315.352	3.617937e+000	3.604843e+000	57	31	8.859514e+000	0	0	0	0	0	0	-4.47116	0	0	65	30.1892
DATA	1528	18	83	66	1	DarkCorner	DarkCorner	8834.84	315.568	3.633318e+000	3.620169e+000	54	26.5	7.211209e+000	0	0	0	0	0	0	-6.14323	0	0	50.7771	25.8077
DATA	1529	18	84	66	1	DarkCorner	DarkCorner	8860.27	315.321	3.649019e+000	3.635814e+000	53	25	7.058784e+000	0	0	0	0	0	0	-6.08918	0	0	49.8279	25.6333
DATA	1530	18	85	66	1	DarkCorner	DarkCorner	8885.58	315.427	3.663997e+000	3.650737e+000	61	25	6.851632e+000	0	0	0	0	0	0	-0.113892	0	0	57.5363	25.6317
DATA	1531	19	1	66	1	DarkCorner	DarkCorner	6739.58	321.427	3.179402e+000	3.167896e+000	60	26	6.804540e+000	0	0	0	0	0	0	-1.03159	0	0	57.5363	26.3441
DATA	1532	19	2	66	1	DarkCorner	DarkCorner	6765.66	321.418	3.157390e+000	3.145963e+000	57	30	6.206957e+000	0	0	0	0	0	0	-4.90605	0	0	53.5237	31
DATA	1533	19	3	66	1	DarkCorner	DarkCorner	6790.42	321.871	3.137278e+000	3.125924e+000	61	32	6.043404e+000	0	0	0	0	0	0	-2.83652	0	0	51.4001	30.9091
DATA	1534	19	4	66	1	DarkCorner	DarkCorner	6816	321.455	3.118410e+000	3.107125e+000	60	28	8.450166e+000	0	0	0	0	0	0	-3.46597	0	0	55.8519	29.9697
DATA	1535	19	5	0	0	A_44_P198705	NM_012578	6841.43	321.015	1.776676e+004	1.776678e+003	16840.5	33	9.473109e+000	0	0	0	0	0	0	16878.7	1	1	45.835	32.8387
DATA	1536	19	6	0	0	A_42_P604252	NM_001108797	6866.58	321.427	1.017031e+003	1.017495e+002	1035	31	5.876213e+000	0	0	0	0	0	0	971.525	1	1	57.5363	31.4333
DATA	1537	19	7	0	0	A_43_P20016	NM_001107377	6892.42	321.427	1.129381e+002	1.170014e+001	170.5	30	8.102606e+000	0	0	0	0	0	0	108.449	1	1	57.5363	30.3438
DATA	1538	19	8	0	0	A_42_P491486	NM_022533	6917.33	321.371	6.147456e+003	6.147531e+002	5603	34	9.643102e+000	0	0	0	0	0	0	5930.94	1	1	47.8731	35.2143
DATA	1539	19	9	0	0	A_64_P345929	NM_001191639	6943	321.455	2.389652e+001	3.857694e+000	86	32.5	7.006490e+000	0	0	0	0	0	0	23.1605	1	1	55.8519	33
DATA	1540	19	10	0	0	A_64_P152047	NM_001000521	6968.42	321.427	1.500106e+001	3.368250e+000	76.5	34	6.141482e+000	0	0	0	0	0	0	14.6001	1	0	57.5363	32.0303
DATA	1541	19	11	0	0	A_42_P724510	NM_001007625	6993.44	321.534	1.999003e+004	1.999006e+003	18799.5	29.5	7.812908e+000	0	0	0	0	0	0	19531.1	1	1	49.1849	31.1923
DATA	1542	19	12	0	0	A_42_P552906	NM_001007701	7018.79	321.699	2.547671e+003	2.547847e+002	2511	30	6.909481e+000	0	0	0	0	0	0	2498.25	1	1	48.2044	30.5313
DATA	1543	19	13	0	0	A_64_P121673	A_64_P121673	7044.5	321.5	1.820007e+001	3.494671e+000	80	31	7.932705e+000	0	0	0	0	0	0	17.9061	1	1	57.5363	31.7353
DATA	1544	19	14	0	0	A_64_P047470	NM_001008875	7069.89	321.5	7.390637e+001	7.966689e+000	140	29.5	7.306872e+000	0	0	0	0	0	0	72.9329	1	1	65	30.9412
DATA	1545	19	15	0	0	A_43_P14911	NM_031512	7095.5	321.5	1.289794e+002	1.323460e+001	189	30	1.015577e+001	0	0	0	0	0	0	127.633	1	1	57.5363	32.7037
DATA	1546	19	16	0	0	A_44_P117234	NM_001191788	7120.51	321.342	2.314387e+001	3.756617e+000	86	35.5	8.238839e+000	0	0	0	0	0	0	22.9572	1	1	48.5334	33.9615
DATA	1547	19	17	0	0	A_64_P066782	ENSRNOT00000046676	7146.24	321.681	8.453930e+002	8.459083e+001	890	31.5	7.896219e+000	0	0	0	0	0	0	840.505	1	1	47.8731	32.7941
DATA	1548	19	18	0	0	A_64_P125013	NM_019167	7171.5	321.5	6.888121e+004	6.888122e+003	68728	31.5	1.068832e+001	0	0	0	0	0	0	68611.9	1	1	57.5363	34.6333
DATA	1549	19	19	0	0	A_64_P143121	NM_001099510	7196.89	321.5	2.431352e+001	3.816467e+000	87	32	8.226759e+000	0	0	0	0	0	0	24.2589	1	1	65	33.7097
DATA	1550	19	20	0	0	A_64_P065600	NM_022954	7222.38	322.151	2.947856e+000	2.939670e+000	65	33	6.120103e+000	0	0	0	0	0	0	1.20703	0	0	48.5334	32.2069
DATA	1551	19	21	0	0	A_44_P300818	AF030087	7247.36	321.258	1.348340e+003	1.348659e+002	1402	31.5	9.239173e+000	0	0	0	0	0	0	1348.69	1	1	46.1809	32.8333
DATA	1552	19	22	0	0	A_64_P103130	A_64_P103130	7273	321.5	3.945100e+003	3.945209e+002	4063	27.5	8.674618e+000	0	0	0	0	0	0	3949.99	1	1	44.4243	29.9063
DATA	1553	19	23	0	0	A_64_P064938	NM_001109332	7298.5	321.5	9.865689e+000	3.091199e+000	74	33	8.677406e+000	0	0	0	0	0	0	9.88459	1	0	57.5363	33.1563
DATA	1554	19	24	0	0	A_64_P087276	NM_138527	7323.89	321.5	2.938896e+000	2.928260e+000	58.5	30	7.443984e+000	0	0	0	0	0	0	-3.36588	0	0	65	30.2903
DATA	1555	19	25	0	0	A_64_P032728	NM_001037778	7349.12	321.623	2.668370e+004	2.668372e+003	26248	32	8.468230e+000	0	0	0	0	0	0	26752.6	1	1	49.8279	32.3714
DATA	1556	19	26	0	0	A_44_P956203	NM_001134992	7374.58	321.573	2.330207e+001	3.741814e+000	86	32.5	9.234130e+000	0	0	0	0	0	0	23.3616	1	1	57.5363	33.9412
DATA	1557	19	27	0	0	A_64_P106488	A_64_P106488	7400.11	321.5	5.903814e+001	6.590202e+000	121	31.5	9.165151e+000	0	0	0	0	0	0	59.1735	1	1	56.9804	32
DATA	1558	19	28	0	0	A_43_P10011	NM_001025274	7425.03	321.939	1.104410e+003	1.104798e+002	1167	31	7.941287e+000	0	0	0	0	0	0	1106.54	1	1	46.8651	32.7241
DATA	1559	19	29	0	0	A_44_P321009	NM_012540	7450.67	321.5	1.244597e+001	3.184978e+000	74.5	33	8.196905e+000	0	0	0	0	0	0	12.4605	1	0	57.5363	33.4516
DATA	1560	19	30	0	0	A_44_P133453	XM_236776	7476	321.729	3.890052e+003	3.890163e+002	3870	33	8.065752e+000	0	0	0	0	0	0	3891.36	1	1	46.8651	33.5278
DATA	1561	19	31	0	0	A_64_P027323	NM_001000088	7501.54	321.614	9.105949e+001	9.568004e+000	153	31	8.583264e+000	0	0	0	0	0	0	90.9893	1	1	47.5395	32.6207
DATA	1562	19	32	0	0	A_44_P374568	NM_001107778	7526.61	321.594	6.022576e+002	6.029753e+001	666	31	6.892162e+000	0	0	0	0	0	0	601.035	1	1	47.5395	31.7576
DATA	1563	19	33	0	0	A_64_P040176	NM_001108498	7552	321.971	2.715531e+003	2.715691e+002	2732	27	7.905566e+000	0	0	0	0	0	0	2706.26	1	1	46.8651	29.7692
DATA	1564	19	34	0	0	A_64_P347204	ENSRNOT00000002350	7577.74	322.188	2.074756e+002	2.095623e+001	267	32	6.392537e+000	0	0	0	0	0	0	206.43	1	1	46.5243	32.6897
DATA	1565	19	35	0	0	A_64_P142544	A_64_P142544	7603.42	321.573	1.898828e+001	3.513214e+000	81	32	7.100870e+000	0	0	0	0	0	0	18.8552	1	1	65	32.7879
DATA	1566	19	36	0	0	A_64_P047367	NM_017050	7628.58	321.573	8.387961e+004	8.387961e+003	83115	29	5.971437e+000	0	0	0	0	0	0	83126	1	1	57.5363	30.4839
DATA	1567	19	37	0	0	A_64_P130858	NM_001003705	7654	321.545	6.954514e+001	7.561468e+000	131	31	5.639921e+000	0	0	0	0	0	0	68.7696	1	1	65	30.6061
DATA	1568	19	38	0	0	A_42_P647009	NM_053814	7679.3	321.9	2.496588e+003	2.496765e+002	2513.5	33	4.683458e+000	0	0	0	0	0	0	2463.15	1	1	47.2035	32.75
DATA	1569	19	39	0	0	A_42_P618538	NM_001030031	7704.43	321.761	1.891634e+003	1.891869e+002	1887	33	9.164262e+000	0	0	0	0	0	0	1861.62	1	1	46.5243	32.375
DATA	1570	19	40	0	0	A_64_P048225	NM_001108643	7730.39	321.931	3.671505e+001	4.735298e+000	98	30	6.032978e+000	0	0	0	0	0	0	36.0355	1	1	53.8203	30.2143
DATA	1571	19	41	0	0	A_64_P044826	A_64_P044826	7755.3	321.9	2.313023e+002	2.332382e+001	287	28.5	1.026140e+001	0	0	0	0	0	0	226.394	1	1	47.2035	30.5
DATA	1572	19	42	0	0	A_64_P046273	NM_001168559	7780.43	321.903	2.712590e+002	2.729212e+001	326.5	31	6.048475e+000	0	0	0	0	0	0	264.727	1	1	48.2044	32.2593
DATA	1573	19	43	0	0	A_43_P16232	NM_024395	7806.09	322.104	3.041286e+003	3.041435e+002	3033	31	7.753903e+000	0	0	0	0	0	0	2958.89	1	1	46.8651	31.8611
DATA	1574	19	44	0	0	A_44_P147356	XM_225859	7831.71	322.083	1.368755e+004	1.368758e+003	13029.5	31	5.646831e+000	0	0	0	0	0	0	13273.3	1	1	50.1463	29.3793
DATA	1575	19	45	0	0	A_44_P979417	ENSRNOT00000068382	7857.39	321.931	3.591021e+001	4.703175e+000	96	29	8.000446e+000	0	0	0	0	0	0	34.7039	1	1	53.8203	30.5882
DATA	1576	19	46	0	0	A_44_P283784	NM_001107682	7882.48	321.776	5.083029e+002	5.092158e+001	548	26.5	7.002976e+000	0	0	0	0	0	0	489.522	1	1	46.5243	28.2083
DATA	1577	19	47	0	0	A_44_P112061	ENSRNOT00000046359	7908	322	6.098670e+002	6.106336e+001	630	31	7.895958e+000	0	0	0	0	0	0	585.234	1	1	54.9904	30.8846
DATA	1578	19	48	0	0	A_42_P541025	NM_212546	7933.5	322	4.321370e+002	4.332262e+001	478	29.5	8.198835e+000	0	0	0	0	0	0	413.135	1	1	54.1152	30.5357
DATA	1579	19	49	0	0	A_44_P156521	NM_001025135	7958.48	321.916	1.133260e+003	1.133679e+002	1128.5	32	9.205099e+000	0	0	0	0	0	0	1079.33	1	1	49.8279	33.5769
DATA	1580	19	50	0	0	A_42_P562202	NM_001107959	7983.76	322	5.787853e+001	6.562858e+000	114.5	32	6.499316e+000	0	0	0	0	0	0	54.9098	1	1	46.8651	32.8261
DATA	1581	19	51	0	0	A_42_P522899	NM_021578	8008.97	321.946	1.070122e+002	1.114294e+001	161	32	6.720469e+000	0	0	0	0	0	0	101.116	1	1	46.8651	31.8
DATA	1582	19	52	0	0	A_42_P581060	NM_001108722	8034.44	322.027	1.507137e+004	1.507140e+003	13587	30	7.819606e+000	0	0	0	0	0	0	14182.5	1	1	48.5334	30.2903
DATA	1583	19	53	0	1	ERCC-00043_129	ERCC-00043_129	8060.5	322	3.144033e+000	3.132655e+000	60	33	7.219001e+000	0	0	0	0	0	0	-3.1017	0	0	54.1152	34.2258
DATA	1584	19	54	0	0	A_64_P098577	A_64_P098577	8085.26	321.797	3.157376e+000	3.145949e+000	61	29	4.204740e+000	0	0	0	0	0	0	-1.53713	0	0	46.8651	28.9565
DATA	1585	19	55	0	0	A_64_P043164	ENSRNOT00000009696	8111.09	322.065	4.618181e+002	4.628979e+001	495	30	6.723855e+000	0	0	0	0	0	0	428.986	1	1	54.4085	31.0909
DATA	1586	19	56	0	0	A_42_P576446	NM_001107673	8136	322	1.002706e+004	1.002711e+003	9069	32	8.820502e+000	0	0	0	0	0	0	9273.53	1	1	46.8651	32.3235
DATA	1587	19	57	0	0	A_42_P801593	NM_001134744	8161.73	322.219	2.561955e+003	2.562154e+002	2328.5	31	9.400228e+000	0	0	0	0	0	0	2358.74	1	1	48.2044	30.9167
DATA	1588	19	58	0	0	A_42_P535743	NM_199393	8187.14	322.192	5.193940e+003	5.194039e+002	4663.5	29	8.097166e+000	0	0	0	0	0	0	4760.08	1	1	47.5395	29.8889
DATA	1589	19	59	0	0	A_64_P051890	ENSRNOT00000056631	8212.82	322.078	2.919395e+001	4.344772e+000	88.5	28	6.953436e+000	0	0	0	0	0	0	26.6297	1	1	48.8603	29.2059
DATA	1590	19	60	0	0	A_64_P098379	NM_001013890	8238.09	322.065	3.244570e+000	3.235196e+000	63	31	8.597886e+000	0	0	0	0	0	0	1.12386	0	0	54.4085	32.069
DATA	1591	19	61	0	0	A_64_P144513	XR_086096	8263.5	322	8.107077e+004	8.107078e+003	73548.5	33	6.286862e+000	0	0	0	0	0	0	73257.5	1	1	54.1152	34.1034
DATA	1592	19	62	0	0	A_44_P325337	NM_001030041	8288.61	322.069	1.160095e+002	1.205124e+001	166.5	29	5.800088e+000	0	0	0	0	0	0	104.338	1	1	53.8203	29.2222
DATA	1593	19	63	0	0	A_44_P142029	NM_001002851	8314	321.774	1.079234e+004	1.079239e+003	9450	31	8.001449e+000	0	0	0	0	0	0	9659.38	1	1	45.4864	31.0938
DATA	1594	19	64	0	0	A_44_P292568	NM_001000207	8339.46	322.225	1.537113e+002	1.572032e+001	196.5	28	9.236093e+000	0	0	0	0	0	0	136.925	1	1	47.5395	29.3448
DATA	1595	19	65	0	0	A_42_P624092	XR_007263	8364.6	322.147	1.060645e+004	1.060650e+003	9050	32	1.060250e+001	0	0	0	0	0	0	9402.72	1	1	48.8603	32.2903
DATA	1596	19	66	0	0	A_42_P597322	NM_001103357	8390.37	322.36	9.752188e+002	9.757862e+001	915	30	7.286366e+000	0	0	0	1	0	0	860.324	1	1	48.8603	30.6552
DATA	1597	19	67	0	0	A_64_P034409	NM_001108146	8415.74	322.42	2.267791e+003	2.268038e+002	2063.5	38	1.170774e+001	0	0	0	0	0	0	1990.91	1	1	46.8651	38.0741
DATA	1598	19	68	0	0	A_64_P112797	NM_001001121	8441.32	322.318	3.288957e+002	3.306075e+001	352	31	6.343986e+000	0	0	0	0	0	0	287.314	1	1	45.835	30.4
DATA	1599	19	69	0	0	A_42_P761023	NM_001144870	8466.46	321.853	4.555212e+002	4.567710e+001	450	31	5.477486e+000	0	0	0	1	0	0	395.961	1	1	46.8651	31.1852
DATA	1600	19	70	0	0	A_42_P465408	NM_031647	8492	322.455	1.096984e+003	1.097509e+002	993	30	9.718954e+000	0	0	0	1	0	0	949.021	1	1	55.8519	31.4839
DATA	1601	19	71	0	0	A_64_P115761	NM_001109379	8517.42	322.427	3.278725e+001	4.730124e+000	89.5	28	5.620729e+000	0	0	0	0	0	0	28.2265	1	1	57.5363	27.8519
DATA	1602	19	72	0	0	A_64_P086487	A_64_P086487	8542.23	322.143	3.872187e+000	3.447715e+000	65.5	29	6.895377e+000	0	0	0	0	0	0	3.31751	1	0	42.2201	28.5714
DATA	1603	19	73	0	0	A_42_P774028	NM_001017447	8567.64	322.224	3.791850e+003	3.792006e+002	3245	27	7.704662e+000	0	0	0	0	0	0	3233.04	1	1	46.1809	28.8519
DATA	1604	19	74	0	0	A_44_P233080	ENSRNOT00000026303	8593.61	322.423	7.304390e+003	7.304472e+002	6056.5	34	1.187566e+001	0	0	0	0	0	0	6197.66	1	1	47.8731	36.6176
DATA	1605	19	75	0	0	A_64_P078002	ENSRNOT00000056206	8619.78	322.131	7.270561e+000	3.551878e+000	67	29.5	1.118312e+001	0	0	0	0	0	0	6.13812	1	0	62.0609	32.8
DATA	1606	19	76	0	0	A_64_P047888	A_64_P047888	8644.42	322.427	6.322654e+000	3.549213e+000	68	30	7.403129e+000	0	0	0	0	0	0	5.31374	1	0	57.5363	30.5217
DATA	1607	19	77	0	0	A_44_P236001	NM_001000623	8669.58	322.427	1.029044e+002	1.087220e+001	147	28	6.940738e+000	0	0	0	0	0	0	86.0815	1	1	57.5363	28.5769
DATA	1608	19	78	0	0	A_42_P819040	TC636720	8695.33	322.5	1.824025e+001	3.969244e+000	77.5	25	6.816646e+000	0	0	0	0	0	0	15.1867	1	1	57.5363	27
DATA	1609	19	79	0	0	A_44_P168184	NM_001166675	8720.45	322.375	2.495397e+003	2.495648e+002	2186	29	7.407970e+000	0	0	0	0	0	0	2068.14	1	1	45.1352	28.6563
DATA	1610	19	80	0	0	A_64_P094925	NM_001024748	8745.84	322.375	6.657081e+002	6.666581e+001	606	26	7.551792e+000	0	0	0	0	0	0	549.223	1	1	44.7812	27.3793
DATA	1611	19	81	0	0	A_44_P332483	NM_173338	8771.42	322.427	6.665912e+000	3.635343e+000	68	29.5	7.372191e+000	0	0	0	0	0	0	5.47484	1	0	65	30.1429
DATA	1612	19	82	0	0	A_42_P530071	NM_001107153	8796.68	322.605	1.104760e+004	1.104765e+003	8866	32	8.566376e+000	0	0	0	1	0	0	9034.34	1	1	49.5074	30.871
DATA	1613	19	83	66	1	DarkCorner	DarkCorner	8822.42	322.685	3.618048e+000	3.604954e+000	58	30.5	8.472355e+000	0	0	0	0	0	0	-3.129	0	0	48.5334	29.2917
DATA	1614	19	84	66	1	DarkCorner	DarkCorner	8847.5	322.5	3.633471e+000	3.620321e+000	55.5	29	7.380076e+000	0	0	0	0	0	0	-2.84682	0	0	57.5363	26.5862
DATA	1615	19	85	66	1	DarkCorner	DarkCorner	8872.95	322.432	3.648747e+000	3.635542e+000	55	25	7.052014e+000	0	0	0	0	0	0	-5.19835	0	0	50.7771	26.4651
DATA	1616	20	1	66	1	DarkCorner	DarkCorner	6752.65	328.272	3.162327e+000	3.150883e+000	61	29	7.051621e+000	0	0	0	0	0	0	-1.51529	0	0	51.0895	29.5814
DATA	1617	20	2	66	1	DarkCorner	DarkCorner	6777.53	328.696	3.141690e+000	3.130320e+000	60	32.5	7.254070e+000	0	0	0	0	0	0	-3.21143	0	0	50.4627	31.6923
DATA	1618	20	3	66	1	DarkCorner	DarkCorner	6803.6	329.063	3.121364e+000	3.110068e+000	54.5	30.5	6.311073e+000	0	0	0	0	0	0	-7.80386	0	0	49.5074	29.0938
DATA	1619	20	4	0	0	A_42_P787775	NM_001127566	6828.42	329.101	8.674073e+002	8.679583e+001	879	28	9.882074e+000	0	0	0	0	0	0	823.365	1	1	47.2035	31.1538
DATA	1620	20	5	0	0	A_42_P607770	NM_001134616	6853.75	328.627	1.358541e+004	1.358545e+003	12694	33	7.659417e+000	0	0	0	0	0	0	12966	1	1	49.1849	33
DATA	1621	20	6	0	0	A_42_P484738	NM_022266	6879.46	328.614	1.821962e+003	1.822219e+002	1810	30.5	5.820625e+000	0	0	0	0	0	0	1748.17	1	1	47.5395	30.3824
DATA	1622	20	7	0	0	A_64_P075273	NM_031743	6904.91	328.614	3.770273e+002	3.782541e+001	426.5	34	1.068444e+001	0	0	0	0	0	0	363.552	1	1	65	36.1875
DATA	1623	20	8	0	0	A_42_P674050	NM_001107225	6930.2	328.614	9.700054e+003	9.700101e+002	9326	34	8.581215e+000	0	0	0	0	0	0	9396.58	1	1	47.2035	34.3824
DATA	1624	20	9	1028	1	(+)E1A_r60_a107	E1A_r60_a107	6955.38	329.225	1.489700e+001	3.364335e+000	77	32	6.583107e+000	0	0	0	0	0	0	14.495	1	0	47.5395	31.6786
DATA	1625	20	10	0	0	A_64_P144253	NM_201350	6981.09	328.935	3.688812e+001	4.757554e+000	97.5	33	7.955032e+000	0	0	0	0	0	0	36.0368	1	1	54.4085	32.5556
DATA	1626	20	11	0	0	A_44_P791729	NM_181377	7006	329	1.251575e+004	1.251579e+003	12335	31	9.756802e+000	0	0	0	0	0	0	12271.8	1	1	46.8651	33.3235
DATA	1627	20	12	0	0	A_42_P550624	NM_001109319	7031.5	329	2.753440e+003	2.753601e+002	2620	31	7.204008e+000	0	0	0	0	0	0	2709.11	1	1	48.5334	31.9091
DATA	1628	20	13	0	0	A_43_P11580	NM_012833	7057.07	328.8	2.604491e+002	2.621414e+001	317	30.5	7.111789e+000	0	0	0	0	0	0	257.058	1	1	46.8651	32.2941
DATA	1629	20	14	0	0	A_44_P417055	XM_223442	7082.44	328.972	9.548654e+002	9.553257e+001	986	32.5	8.199906e+000	0	0	0	0	0	0	945.17	1	1	48.2044	33.0385
DATA	1630	20	15	0	0	A_64_P142867	A_64_P142867	7107.87	329	1.551972e+004	1.551975e+003	15422.5	31	9.933773e+000	0	0	0	0	0	0	15402.1	1	1	48.5334	32.9565
DATA	1631	20	16	0	0	A_64_P013002	XM_001072551	7133.32	328.941	2.008885e+001	3.569670e+000	82	31.5	7.615096e+000	0	0	0	0	0	0	19.9826	1	1	45.835	32.8056
DATA	1632	20	17	0	0	A_42_P457692	NM_001008363	7158.5	329	6.673364e+003	6.673429e+002	6560	31	9.525644e+000	0	0	0	0	0	0	6651.66	1	1	48.5334	31.2593
DATA	1633	20	18	0	0	A_42_P788480	NM_019194	7183.95	329.093	9.179627e+003	9.179674e+002	9115	32	1.024518e+001	0	0	0	0	0	0	9166.35	1	1	46.8651	34.4375
DATA	1634	20	19	0	0	A_42_P518462	NM_001007020	7209.59	329.092	8.792373e+003	8.792422e+002	8686	29.5	6.385644e+000	0	0	0	0	0	0	8793.2	1	1	49.1849	30.4643
DATA	1635	20	20	0	0	A_64_P007578	NM_001000851	7235	329	1.298131e+001	3.205787e+000	76	34	1.065317e+001	0	0	0	0	0	0	12.9988	1	0	54.9904	35.4815
DATA	1636	20	21	0	0	A_64_P139350	NM_001191727	7260.14	328.771	4.563365e+001	5.422139e+000	108.5	32	8.307012e+000	0	0	0	0	0	0	45.7395	1	1	46.5243	33.1613
DATA	1637	20	22	0	0	A_64_P100442	ENSRNOT00000067861	7285.79	328.806	2.089667e+002	2.110053e+001	276	32.5	8.850511e+000	0	0	0	0	0	0	209.619	1	1	47.5395	31.8235
DATA	1638	20	23	1028	1	(+)E1A_r60_a135	E1A_r60_a135	7311.5	329	2.934922e+000	2.924334e+000	64	33	7.362654e+000	0	0	0	0	0	0	0.140645	0	0	54.1152	32.2813
DATA	1639	20	24	0	0	A_44_P459760	NM_001108187	7336.55	328.797	4.032695e+001	4.980929e+000	104	32	8.842206e+000	0	0	0	0	0	0	40.4873	1	1	46.8651	32.2308
DATA	1640	20	25	0	0	A_64_P115536	NM_212545	7362	329	8.862567e+000	3.054562e+000	72	32	9.945084e+000	0	0	0	0	0	0	8.89891	1	0	65	32.4737
DATA	1641	20	26	0	0	A_44_P538406	NM_013102	7387.09	329.104	1.889237e+004	1.889240e+003	18573	34.5	9.547517e+000	0	0	0	0	0	0	18967.6	1	1	46.8651	35.2353
DATA	1642	20	27	0	0	A_64_P120871	NM_198743	7412.73	329.219	1.000150e+003	1.000578e+002	1019	32.5	8.700840e+000	0	0	0	0	0	0	1003.79	1	1	48.2044	32.7692
DATA	1643	20	28	0	0	A_44_P173048	NM_001009255	7437.79	329.194	1.712014e+003	1.712264e+002	1762	33	7.226457e+000	0	0	0	0	0	0	1717.28	1	1	47.5395	34.3103
DATA	1644	20	29	0	0	A_64_P058060	NM_001037541	7463.3	328.942	1.830251e+001	3.453469e+000	81	33	4.864704e+000	0	0	0	0	0	0	18.3435	1	1	46.1809	32.0357
DATA	1645	20	30	0	0	A_64_P145982	NM_001109366	7488.91	329.065	4.077806e+001	5.022122e+000	104	30	9.376979e+000	0	0	0	0	0	0	40.83	1	1	54.4085	31.8857
DATA	1646	20	31	0	0	A_42_P514244	NM_012791	7514.21	328.956	2.165815e+002	2.185611e+001	278	33	7.065492e+000	0	0	0	0	0	0	216.598	1	1	46.5243	33.2759
DATA	1648	20	33	0	0	A_64_P159155	XM_001071429	7565.37	329.404	2.854831e+001	4.100423e+000	91.5	29	1.129008e+001	0	0	0	0	0	0	28.4686	1	1	57.8122	31.8182
DATA	1649	20	34	0	0	A_64_P030272	ENSRNOT00000041731	7590.5	329.352	2.221620e+002	2.241100e+001	286	32	6.471993e+000	0	0	0	0	0	0	221.157	1	1	57.5363	33.6207
DATA	1650	20	35	0	0	A_42_P733076	NM_001033867	7615.91	329.386	3.067845e+002	3.082035e+001	370	29.5	5.161826e+000	0	0	0	0	0	0	304.812	1	1	65	30.3889
DATA	1651	20	36	0	0	A_44_P349475	NM_031333	7641.06	329.382	1.325304e+003	1.325634e+002	1315	30	6.007128e+000	0	0	0	0	0	0	1314.05	1	1	46.1809	30.5676
DATA	1652	20	37	0	0	A_64_P009848	NM_001034135	7666.44	328.768	6.029125e+003	6.029198e+002	5983	32.5	7.276839e+000	0	0	0	0	0	0	5963.72	1	1	46.8651	33.2857
DATA	1653	20	38	0	0	A_64_P116685	NM_001166763	7692.15	328.894	4.850176e+003	4.850267e+002	4822.5	30	5.507571e+000	0	0	0	0	0	0	4785.91	1	1	46.1809	29.5556
DATA	1654	20	39	0	0	A_64_P072659	NM_001109296	7717.58	328.894	2.142698e+003	2.142906e+002	2213	29	9.017449e+000	0	0	0	0	0	0	2108.84	1	1	45.4864	30.2424
DATA	1655	20	40	0	0	A_42_P808442	NM_001108759	7742.89	329.5	6.912823e+002	6.919286e+001	741	27	6.609201e+000	0	0	0	0	0	0	678.589	1	1	56.9804	26.8077
DATA	1656	20	41	0	0	A_64_P140836	NM_001017486	7768.07	329.268	1.305206e+002	1.339212e+001	184.5	31	9.930249e+000	0	0	0	0	0	0	127.752	1	1	47.5395	33.1212
DATA	1657	20	42	0	0	A_64_P034384	NM_019227	7793.42	329.184	3.206307e+002	3.220385e+001	373.5	29	5.210952e+000	0	0	0	0	0	0	312.88	1	1	49.5074	30.1333
DATA	1658	20	43	0	0	A_42_P730411	NM_001012181	7818.82	329.361	7.378100e+002	7.384267e+001	763	34	1.332877e+001	0	0	0	0	0	0	717.727	1	1	47.8731	37.5122
DATA	1659	20	44	0	0	A_44_P396450	ENSRNOT00000018433	7844.5	329.5	2.083951e+002	2.105824e+001	266	29	6.732474e+000	0	0	0	0	0	0	202.054	1	1	57.5363	29.3529
DATA	1660	20	45	0	0	A_44_P268610	NM_001109134	7869.56	328.768	5.971527e+003	5.971605e+002	5712	31	1.275344e+001	0	0	0	0	0	0	5769.47	1	1	46.8651	34.6897
DATA	1661	20	46	0	0	A_64_P059105	NM_001134544	7895.55	329.045	9.837740e+001	1.029934e+001	156	26	5.438813e+000	0	0	0	0	0	0	94.7102	1	1	45.4864	26.1071
DATA	1662	20	47	0	0	A_42_P524851	NM_001130061	7920.5	329.056	1.871898e+003	1.872148e+002	1802.5	31	7.591223e+000	0	0	0	0	0	0	1795.66	1	1	48.5334	31.72
DATA	1663	20	48	0	0	A_64_P141675	FM127585	7945.86	328.844	7.645470e+003	7.645532e+002	7205	30	8.759519e+000	0	0	0	0	0	0	7306.21	1	1	45.4864	31.6667
DATA	1664	20	49	0	0	A_64_P002979	ENSRNOT00000034762	7971.5	329.5	3.094258e+000	3.084157e+000	64	35	9.040173e+000	0	0	0	0	0	0	0.782992	0	0	65	34.4839
DATA	1665	20	50	0	0	A_44_P175822	NM_001109511	7996.57	329.395	1.422723e+002	1.456004e+001	198	35	6.897204e+000	0	0	0	0	0	0	134.914	1	1	49.5074	32.6429
DATA	1666	20	51	0	0	A_44_P1008751	NM_001137645	8022.33	329.5	2.042386e+002	2.065898e+001	259	32	8.276668e+000	0	0	0	0	0	0	192.881	1	1	57.5363	31.6452
DATA	1667	20	52	0	0	A_44_P255350	NM_001007674	8047.22	329.319	3.963425e+002	3.975693e+001	433.5	33.5	1.121738e+001	0	0	0	0	0	0	372.766	1	1	47.2035	36.0938
DATA	1668	20	53	0	0	A_64_P017328	NM_012758	8073	329.455	7.687122e+002	7.693508e+001	779	30.5	7.379453e+000	0	0	0	0	0	0	719.898	1	1	55.8519	30.7059
DATA	1669	20	54	0	0	A_64_P132571	NM_001107703	8098.06	329.113	1.268224e+004	1.268228e+003	11817	28	4.041288e+000	0	0	0	0	0	0	11825.5	1	1	45.1352	27.9643
DATA	1670	20	55	0	0	A_44_P107535	NM_001170336	8123.83	329.347	5.887933e+002	5.896415e+001	615	30	9.294846e+000	0	0	0	0	0	0	546.6	1	1	49.5074	31.8438
DATA	1671	20	56	0	0	A_44_P353618	NM_053587	8148.91	329.057	2.224275e+002	2.246834e+001	270	33	8.735348e+000	0	0	0	0	0	0	205.566	1	1	46.8651	32.1622
DATA	1672	20	57	0	0	A_44_P213336	A_44_P213336	8175	329.5	6.101814e+002	6.110149e+001	624	25	8.480338e+000	0	0	0	0	0	0	561.364	1	1	44.4243	28.871
DATA	1673	20	58	0	0	A_42_P507072	FQ213070	8199.87	329.487	5.180607e+003	5.180707e+002	4669	30	8.131460e+000	0	0	0	0	0	0	4744.75	1	1	50.1463	30.2222
DATA	1674	20	59	0	0	A_44_P428886	NM_001099516	8225.5	329.5	5.638424e+002	5.647609e+001	581	31	7.532224e+000	0	0	0	0	0	0	513.994	1	1	49.1849	30.4118
DATA	1675	20	60	0	0	A_64_P086784	NM_001108657	8250.68	329.532	5.980430e+003	5.980517e+002	5394	33	9.326323e+000	0	0	0	0	0	0	5426.47	1	1	50.4627	33.1379
DATA	1676	20	61	0	0	A_42_P654682	NM_012724	8276.33	329.5	1.168123e+001	3.453832e+000	74	33	9.252670e+000	0	0	0	0	0	0	10.5486	1	0	57.5363	35.5313
DATA	1677	20	62	0	0	A_44_P443008	NM_001013068	8301.44	329.534	6.693392e+002	6.701354e+001	665	30.5	7.578022e+000	0	0	0	0	0	0	601.604	1	1	49.1849	32.1563
DATA	1678	20	63	0	0	A_64_P027229	A_64_P027229	8326.63	329.528	1.434491e+003	1.434867e+002	1347	33	9.435762e+000	0	0	0	0	0	0	1283.2	1	1	48.2044	31.7143
DATA	1679	20	64	0	0	A_64_P134277	ENSRNOT00000029167	8352.42	329.573	9.204777e+001	9.777523e+000	153	26	8.551670e+000	0	0	0	0	0	0	81.9386	1	1	57.5363	27.8519
DATA	1680	20	65	0	0	A_64_P165548	XM_001055860	8377.58	329.573	1.168095e+002	1.214173e+001	167	32.5	8.714003e+000	0	0	0	0	0	0	103.483	1	1	57.5363	32.4231
DATA	1681	20	66	0	0	A_64_P014737	NM_001000069	8403.33	329.5	1.096582e+001	3.505491e+000	74	33	9.215111e+000	0	0	0	0	0	0	9.66684	1	0	65	33.5806
DATA	1682	20	67	0	0	A_42_P627330	NM_001106628	8428.13	329.529	8.463209e+002	8.469818e+001	801	33	8.476569e+000	0	0	0	0	0	0	742.536	1	1	47.8731	32.931
DATA	1683	20	68	0	0	A_64_P039452	NM_001109063	8453.68	329.618	3.270272e+002	3.287506e+001	361.5	32	5.406090e+000	0	0	0	0	0	0	285.527	1	1	46.5243	31.5
DATA	1684	20	69	0	0	A_44_P516885	ENSRNOT00000005601	8479.42	329.573	6.523801e+004	6.523802e+003	56515	31	9.400896e+000	0	0	0	0	0	0	56678.1	1	1	57.5363	32.3448
DATA	1685	20	70	0	0	A_44_P839176	NM_001107114	8504.88	329.343	3.725318e+003	3.725473e+002	3293	27	6.804138e+000	0	0	0	0	0	0	3220.58	1	1	45.835	27
DATA	1686	20	71	0	0	A_64_P083342	AABR03026150	8530	329.545	2.538306e+001	4.252063e+000	86	28	6.385946e+000	0	0	0	0	0	0	21.84	1	1	65	27.9697
DATA	1687	20	72	0	0	A_42_P618185	NM_001108486	8555.37	329.5	4.890609e+003	4.890729e+002	4118.5	30	8.077714e+000	0	0	0	1	0	0	4187.64	1	1	47.8731	29.129
DATA	1688	20	73	0	0	A_42_P619957	NM_053830	8580.58	329.573	3.122205e+002	3.141144e+001	317	30	1.101589e+001	0	0	0	1	0	0	266.074	1	1	57.5363	33.2759
DATA	1689	20	74	0	0	A_44_P375042	NM_001014243	8606.45	329.477	4.240510e+002	4.254612e+001	425	37	1.300269e+001	0	0	0	0	0	0	359.611	1	1	57.5363	37.4848
DATA	1690	20	75	0	0	A_44_P438053	NM_001004201	8631.43	330.031	1.224305e+002	1.272715e+001	169	30	8.300759e+000	0	0	0	0	0	0	103.357	1	1	44.7812	31.9545
DATA	1691	20	76	0	0	A_43_P19181	ENSRNOT00000018440	8657.09	329.614	1.211191e+002	1.260574e+001	165	29.5	7.123218e+000	0	0	0	0	0	0	101.753	1	1	57.259	29.5333
DATA	1692	20	77	0	0	A_42_P664259	NM_024396	8682.5	329.648	5.539982e+004	5.539983e+003	45602	26	7.365544e+000	0	0	0	0	0	0	46325.8	1	1	57.5363	27.4138
DATA	1693	20	78	0	0	A_44_P588645	FQ230244	8707.84	329.897	1.206324e+002	1.256799e+001	163	28	8.608050e+000	0	0	0	0	0	0	100.418	1	1	46.5243	29.7931
DATA	1694	20	79	0	0	A_64_P030844	XM_001065657	8733.47	329.9	2.056691e+001	4.096038e+000	79	27	7.395578e+000	0	0	0	0	0	0	17.042	1	1	47.8731	28.1379
DATA	1695	20	80	0	0	A_64_P054823	A_64_P054823	8758.57	329.761	1.546024e+004	1.546028e+003	12596	27.5	8.233982e+000	0	0	0	0	0	0	12753.3	1	1	46.5243	28.9615
DATA	1696	20	81	0	0	A_42_P516860	XM_001059330	8784	330	1.117718e+002	1.173460e+001	151	29.5	8.000223e+000	0	0	0	0	0	0	91.8003	1	1	54.9904	30.7647
DATA	1697	20	82	0	0	A_64_P085772	NM_001191606	8809.27	329.775	1.314169e+002	1.362308e+001	170	30.5	7.721902e+000	0	0	0	0	0	0	107.462	1	1	47.2035	30.9722
DATA	1698	20	83	66	1	DarkCorner	DarkCorner	8834.61	329.931	3.617709e+000	3.604616e+000	57	26	8.235302e+000	0	0	0	0	0	0	-3.8927	0	0	53.8203	26.0345
DATA	1699	20	84	66	1	DarkCorner	DarkCorner	8860.26	329.961	3.633015e+000	3.619867e+000	53.5	26	5.479640e+000	0	0	0	0	0	0	-4.34817	0	0	49.1849	25.7857
DATA	1700	20	85	66	1	DarkCorner	DarkCorner	8885.5	330	3.647794e+000	3.636153e+000	61	25	6.941065e+000	0	0	0	0	0	0	0.860307	0	0	54.1152	25.962
DATA	1701	21	1	66	1	DarkCorner	DarkCorner	6739.61	335.931	3.166855e+000	3.155394e+000	61.5	27	7.105647e+000	0	0	0	0	0	0	-0.0573688	0	0	53.8203	27.304
DATA	1702	21	2	66	1	DarkCorner	DarkCorner	6765.29	336.093	3.145332e+000	3.133949e+000	59	31.5	6.045134e+000	0	0	0	0	0	0	-2.70497	0	0	48.8603	31.1071
DATA	1703	21	3	66	1	DarkCorner	DarkCorner	6790.39	336.27	3.125468e+000	3.114157e+000	54.5	31.5	7.161774e+000	0	0	0	0	0	0	-7.1375	0	0	47.8731	31.4286
DATA	1704	21	4	0	0	A_44_P277669	NM_001163736	6815.63	336.043	1.077353e+003	1.077798e+002	1067.5	26.5	6.889122e+000	0	0	0	0	0	0	1021.47	1	1	46.8651	27.5
DATA	1705	21	5	0	0	A_42_P788480	NM_019194	6841.25	336	9.347734e+003	9.347785e+002	8643	30	1.120783e+001	0	0	0	0	0	0	8914.01	1	1	49.1849	33.6667
DATA	1706	21	6	0	0	A_42_P558354	NM_001007686	6866.37	336.127	3.590532e+003	3.590663e+002	3375	30	6.021456e+000	0	0	0	0	0	0	3442.33	1	1	47.5395	30.9643
DATA	1707	21	7	0	0	A_44_P714409	NM_001047907	6891.92	336.11	3.736908e+003	3.737032e+002	3582	30	4.614652e+000	0	0	0	0	0	0	3600.98	1	1	46.8651	29.0882
DATA	1708	21	8	0	0	A_42_P604331	NM_001108533	6917.5	336	1.011147e+005	1.011147e+004	98433.5	36	9.732995e+000	0	0	0	0	0	0	97902.2	1	1	54.1152	37.2581
DATA	1709	21	9	0	0	A_64_P139472	NM_173119	6942.78	336.084	4.669613e+003	4.669710e+002	4478.5	32	5.918577e+000	0	0	0	0	0	0	4541.42	1	1	49.8279	31.3793
DATA	1710	21	10	0	0	A_42_P711589	NM_022948	6968.14	336.192	9.781137e+003	9.781183e+002	9379	34	7.065123e+000	0	0	0	0	0	0	9552.34	1	1	47.5395	33.2857
DATA	1711	21	11	0	0	A_42_P813567	NM_031841	6993.5	336	1.105310e+005	1.105310e+004	108850	33.5	7.051868e+000	0	0	0	0	0	0	108357	1	1	54.1152	33.1071
DATA	1712	21	12	0	0	A_42_P647505	TC640289	7018.93	336.222	3.990139e+003	3.990251e+002	3895.5	30	6.909696e+000	0	0	0	0	0	0	3925.8	1	1	47.2035	31.6098
DATA	1713	21	13	0	0	A_64_P094313	NM_032073	7044.25	336	1.025390e+003	1.025821e+002	1085	33.5	6.820061e+000	0	0	0	0	0	0	1012.1	1	1	49.1849	33.9286
DATA	1714	21	14	0	0	A_42_P577421	NM_001106819	7069.65	336.084	5.722578e+002	5.730252e+001	633	31	7.141959e+000	0	0	0	0	0	0	566.542	1	1	49.8279	32.8485
DATA	1715	21	15	0	0	A_42_P477311	NM_001013170	7095.28	336.118	1.495277e+004	1.495280e+003	14689	33	9.776581e+000	0	0	0	0	0	0	14844	1	1	48.8603	34.6923
DATA	1716	21	16	0	0	A_42_P630249	NM_031824	7120.44	336.027	3.761416e+003	3.761532e+002	3789	34	9.963173e+000	0	0	0	0	0	0	3743	1	1	48.5334	35.087
DATA	1717	21	17	0	0	A_42_P618256	NM_001024759	7145.99	336.239	8.833870e+002	8.838771e+001	935	34	8.069323e+000	0	0	0	0	0	0	881.018	1	1	46.8651	33.7742
DATA	1718	21	18	0	0	A_64_P101584	A_64_P101584	7171.37	336.164	4.712784e+002	4.721930e+001	530	32.5	1.028021e+001	0	0	0	0	0	0	470.9	1	1	48.5334	34.8
DATA	1719	21	19	0	0	A_64_P045461	NM_001106750	7196.91	336.386	2.559177e+002	2.575924e+001	312.5	31	6.917790e+000	0	0	0	0	0	0	256.146	1	1	57.259	31.3214
DATA	1720	21	20	0	0	A_64_P056485	ENSRNOT00000033663	7222.25	336.356	1.861093e+003	1.861323e+002	1889.5	33	7.839430e+000	0	0	0	0	0	0	1865.32	1	1	48.5334	31.96
DATA	1721	21	21	0	0	A_64_P013077	A_64_P013077	7247.58	336.427	7.432378e+001	7.987283e+000	138.5	35.5	1.060411e+001	0	0	0	0	0	0	74.5781	1	1	57.5363	37.3667
DATA	1722	21	22	0	0	A_44_P348952	NM_001000368	7273.14	336.407	7.533660e+000	3.018069e+000	72	30	9.572316e+000	0	0	0	0	0	0	7.5662	1	0	56.9804	31.6471
DATA	1723	21	23	0	0	A_64_P147609	NM_001106295	7298.54	336.299	7.110328e+003	7.110388e+002	7072.5	32	9.648967e+000	0	0	0	0	0	0	7145.53	1	1	52.0157	32.5556
DATA	1724	21	24	0	0	A_44_P193928	NM_183328	7323.38	336.417	1.601408e+003	1.601675e+002	1564.5	34	1.083008e+001	0	0	0	0	0	0	1610.04	1	1	48.2044	36.8276
DATA	1725	21	25	0	0	A_44_P441947	XM_001079870	7349	336.5	1.309058e+003	1.309383e+002	1382	34	8.299900e+000	0	0	0	0	0	0	1316.39	1	1	47.2035	32.7632
DATA	1726	21	26	0	0	A_42_P666259	NM_001009661	7374.44	336.466	1.594638e+004	1.594641e+003	15594.5	31	7.641087e+000	0	0	0	0	0	0	16035	1	1	49.1849	30.6
DATA	1727	21	27	0	0	A_64_P082486	A_64_P082486	7399.71	336.712	1.438771e+003	1.439067e+002	1527	32	7.800022e+000	0	0	0	0	0	0	1446.47	1	1	48.2044	32.4286
DATA	1728	21	28	0	0	A_64_P091940	NM_033237	7425.29	336.507	2.504964e+002	2.521937e+001	306.5	35	7.276783e+000	0	0	0	0	0	0	251.707	1	1	48.8603	34.5185
DATA	1729	21	29	0	0	A_64_P144899	NM_001107736	7450.56	336.029	6.722752e+002	6.729105e+001	723	33.5	7.574236e+000	0	0	0	0	0	0	675.005	1	1	47.5395	34.9643
DATA	1730	21	30	0	0	A_44_P410062	XM_224553	7476.17	336.2	2.488910e+002	2.506047e+001	309.5	33	8.819813e+000	0	0	0	0	0	0	249.687	1	1	46.5243	33.175
DATA	1731	21	31	0	0	A_42_P489764	NM_001004099	7501.21	336.243	3.487726e+003	3.487849e+002	3474.5	31	8.881144e+000	0	0	0	0	0	0	3495.18	1	1	46.8651	32.2333
DATA	1732	21	32	0	0	A_42_P640277	NM_001003401	7527	336.455	4.775919e+004	4.775919e+003	47172.5	32	6.967521e+000	0	0	0	0	0	0	47801.1	1	1	55.8519	31.6176
DATA	1733	21	33	0	0	A_44_P212850	NM_019305	7552.5	336.5	5.590410e+001	6.314901e+000	118	34.5	1.084124e+001	0	0	0	0	0	0	55.8711	1	1	57.5363	34.1944
DATA	1734	21	34	0	0	A_64_P125506	NM_021677	7577.83	336.688	3.294464e+002	3.307571e+001	396	32	9.033641e+000	0	0	0	0	0	0	328.721	1	1	45.4864	31.24
DATA	1735	21	35	0	0	A_42_P802358	NM_001024341	7602.69	336.662	1.701505e+004	1.701507e+003	16581	33	5.818266e+000	0	0	0	0	0	0	16947.1	1	1	48.5334	33.069
DATA	1736	21	36	0	0	A_44_P552852	XM_346367	7628.5	336.5	9.075838e+000	3.089356e+000	71.5	31	4.651379e+000	0	0	0	0	0	0	9.02088	1	0	57.5363	30.5926
DATA	1738	21	38	0	0	A_64_P141187	NM_001108899	7679.5	336.5	1.464034e+001	3.308071e+000	78.5	32	5.018200e+000	0	0	0	0	0	0	14.4858	1	0	65	31.4815
DATA	1739	21	39	0	0	A_44_P274823	NM_001105831	7704.5	336.5	3.974723e+003	3.974834e+002	3871	30	8.373766e+000	0	0	0	0	0	0	3923.09	1	1	49.1849	30.4063
DATA	1740	21	40	0	0	A_42_P804913	ENSRNOT00000022886	7730.41	336.575	5.403831e+001	6.171917e+000	114.5	29.5	8.524164e+000	0	0	0	0	0	0	53.1928	1	1	48.5334	29.9286
DATA	1741	21	41	0	0	A_64_P113970	NM_212501	7755.18	336.507	4.772829e+003	4.772923e+002	4587	31	1.165029e+001	0	0	0	0	0	0	4685.25	1	1	47.8731	33.037
DATA	1742	21	42	1028	1	(+)E1A_r60_3	E1A_r60_3	7780.89	336.5	4.119966e+001	5.095865e+000	103	31	8.766148e+000	0	0	0	0	0	0	40.3231	1	1	65	33.6486
DATA	1743	21	43	0	0	A_42_P661992	TC596141	7805.96	336.771	7.020073e+002	7.026514e+001	733	32	8.052474e+000	0	0	0	0	0	0	685.02	1	1	46.8651	33.1351
DATA	1744	21	44	0	0	A_42_P577431	NM_001109422	7831.67	336.5	1.007208e+002	1.051449e+001	158	36	1.327834e+001	0	0	0	0	0	0	97.9583	1	1	57.5363	39.2424
DATA	1745	21	45	0	0	A_44_P524785	NM_001000184	7857.33	336.5	8.544058e+000	3.146387e+000	71	32	1.014760e+001	0	0	0	0	0	0	8.28164	1	0	65	34.4231
DATA	1746	21	46	0	0	A_64_P027634	NM_001000223	7882.5	336.5	5.896498e+001	6.633383e+000	118.5	31	1.355551e+001	0	0	0	0	0	0	56.9576	1	1	57.5363	35.2424
DATA	1747	21	47	0	0	A_42_P492976	NM_001126099	7907.85	336.52	3.428810e+002	3.442344e+001	377.5	27	5.693316e+000	0	0	0	0	0	0	330.024	1	1	49.8279	26.4231
DATA	1748	21	48	0	0	A_64_P157479	AABR03127998	7933	336.657	1.110180e+004	1.110184e+003	10325	32	8.256506e+000	0	0	0	0	0	0	10646.7	1	1	45.4864	31.6452
DATA	1749	21	49	0	0	A_44_P391706	NM_001007796	7958.58	336.573	2.115901e+002	2.138092e+001	257	28	8.434221e+000	0	0	0	0	0	0	202.136	1	1	57.5363	30.3438
DATA	1750	21	50	0	0	A_44_P184685	NM_001007735	7984.33	336.5	1.211127e+002	1.249793e+001	180	32	8.615315e+000	0	0	0	0	0	0	115.241	1	1	57.5363	31.9032
DATA	1751	21	51	0	0	A_44_P475275	NM_001000893	8009.65	337	8.266525e+001	8.827526e+000	137	31	8.938235e+000	0	0	0	0	0	0	78.3518	1	1	46.5243	32.2727
DATA	1752	21	52	0	0	A_44_P270056	NM_001007800	8034.74	336.932	1.673011e+002	1.701660e+001	222	34	8.699805e+000	0	0	0	0	0	0	157.928	1	1	47.8731	34.0741
DATA	1753	21	53	0	0	A_64_P059351	NM_001145175	8060.06	336.464	1.457986e+002	1.491051e+001	203	31	7.503438e+000	0	0	0	0	0	0	137.043	1	1	47.5395	32.6111
DATA	1754	21	54	0	0	A_42_P573441	NM_001105742	8085.53	336.722	8.572393e+003	8.572450e+002	7812	28	5.050407e+000	0	0	0	0	0	0	8023.6	1	1	48.2044	28.3929
DATA	1755	21	55	0	0	A_42_P485589	NM_017246	8111.05	336.523	1.330120e+002	1.366905e+001	185	28	8.218089e+000	0	0	0	0	0	0	123.949	1	1	55.8519	30.2368
DATA	1756	21	56	0	0	A_44_P149540	XM_223051	8136.39	336.594	2.144939e+004	2.144941e+003	19657	31	8.908687e+000	0	0	0	0	0	0	19900.2	1	1	47.5395	31.6
DATA	1757	21	57	0	0	A_44_P323236	NM_001000513	8161.58	336.573	1.963576e+001	3.735473e+000	80	30	8.357434e+000	0	0	0	0	0	0	18.1367	1	1	57.5363	30.1765
DATA	1759	21	59	0	0	A_64_P100447	NM_001173469	8212.58	336.573	2.248594e+001	3.916811e+000	82	31	7.607093e+000	0	0	0	0	0	0	20.5795	1	1	57.5363	30.4865
DATA	1760	21	60	0	0	A_64_P150008	A_64_P150008	8238.09	336.614	1.067941e+002	1.115488e+001	162	32	7.850815e+000	0	0	0	0	0	0	97.2853	1	1	57.259	32.2
DATA	1761	21	61	0	0	A_42_P481696	NM_022508	8263.14	336.722	2.760414e+003	2.760603e+002	2478.5	33	9.837760e+000	0	0	0	0	0	0	2503.08	1	1	47.8731	34.5714
DATA	1762	21	62	0	0	A_64_P033755	AABR03073220	8288.58	336.573	8.411286e+001	9.018193e+000	138	31	7.650232e+000	0	0	0	0	0	0	75.9083	1	1	57.5363	31.6571
DATA	1763	21	63	0	0	A_64_P115980	NM_001109458	8314.44	336.973	3.444126e+002	3.459595e+001	375	31	8.351018e+000	0	0	0	0	0	0	309.343	1	1	48.5334	32.2857
DATA	1764	21	64	0	0	A_64_P001426	NM_001126301	8339.5	337	1.903133e+002	1.931249e+001	229	30	9.804541e+000	0	0	0	0	0	0	170.129	1	1	54.1152	29.75
DATA	1765	21	65	0	0	A_64_P012987	NM_001108668	8364.88	336.905	1.830877e+003	1.831174e+002	1634	32	9.660467e+000	0	0	0	0	0	0	1628.81	1	1	47.5395	31.7308
DATA	1767	21	67	0	0	A_42_P668289	TC585832	8415.56	336.973	4.112757e+003	4.112892e+002	3591	38	1.054998e+001	0	0	0	0	0	0	3623.73	1	1	48.5334	36.0741
DATA	1768	21	68	0	0	A_64_P052690	ENSRNOT00000036634	8441.1	337.014	7.745730e+002	7.752960e+001	715	34	7.136839e+000	0	0	0	0	0	0	679.159	1	1	46.8651	33.0313
DATA	1769	21	69	0	0	A_42_P593020	NM_013413	8466.5	336.957	7.292771e+001	8.031184e+000	126	31	6.339920e+000	0	0	0	0	0	0	63.6338	1	1	47.8731	31.8621
DATA	1770	21	70	0	0	A_64_P037303	NM_001127530	8492	337	1.262803e+003	1.263255e+002	1127	30	9.462570e+000	0	0	0	0	0	0	1096.53	1	1	54.9904	31.3333
DATA	1771	21	71	0	0	A_44_P684180	NM_001037363	8517.44	336.973	9.038706e+003	9.038770e+002	7760	29.5	6.509410e+000	0	0	0	0	0	0	7810.61	1	1	48.5334	28.8
DATA	1772	21	72	0	0	A_64_P104743	NM_133518	8543	337	1.905562e+002	1.935888e+001	230	30	7.557955e+000	0	0	0	0	0	0	163.869	1	1	46.8651	29.6286
DATA	1773	21	73	0	0	A_44_P941132	NM_001108128	8567.88	336.905	7.938313e+003	7.938387e+002	6562	30	8.243192e+000	0	0	0	0	0	0	6794.35	1	1	47.5395	30.0455
DATA	1774	21	74	0	0	A_44_P187080	NM_001110823	8593.5	337	3.127226e+004	3.127228e+003	25671.5	35	1.322860e+001	0	0	0	0	0	0	26637.7	1	1	48.5334	36.6875
DATA	1775	21	75	0	0	A_42_P574960	ENSRNOT00000068719	8618.78	337	8.570366e+002	8.577356e+001	773	33	1.508233e+001	0	0	0	1	0	0	726.585	1	1	46.1809	37.32
DATA	1776	21	76	0	0	A_64_P094850	A_64_P094850	8644.48	337.194	8.266414e+001	8.968467e+000	131	27.5	8.185259e+000	0	0	0	0	0	0	69.7523	1	1	46.5243	28.0385
DATA	1777	21	77	0	0	A_43_P13418	NM_172042	8669.72	336.97	9.045427e+003	9.045495e+002	7564	28.5	7.521949e+000	0	0	0	0	0	0	7596.81	1	1	45.835	28.3333
DATA	1778	21	78	66	-1	(-)3xSLv1	NegativeControl	8695.39	337.069	3.523852e+000	3.511099e+000	55	25	9.716309e+000	0	0	0	0	0	0	-6.76712	0	0	53.8203	28.36
DATA	1779	21	79	0	0	A_44_P321594	ENSRNOT00000006966	8720.46	337.294	4.547246e+001	5.754580e+000	102	24	7.472205e+000	0	0	0	0	0	0	37.845	1	1	46.8651	28.0769
DATA	1780	21	80	0	0	A_44_P792531	NM_001025700	8745.91	337.065	2.419171e+002	2.444977e+001	261	28	8.358594e+000	0	0	0	0	0	0	200.419	1	1	54.4085	28.5926
DATA	1781	21	81	0	0	A_43_P14795	NM_001044248	8771.29	337.083	1.430241e+003	1.430683e+002	1227	29	9.619839e+000	0	0	0	0	0	0	1179.66	1	1	50.1463	30.1852
DATA	1782	21	82	0	0	A_42_P671502	NM_053467	8796.56	337.027	7.591590e+003	7.591674e+002	6059	31.5	7.804942e+000	0	0	0	0	0	0	6234.29	1	1	48.5334	31.8529
DATA	1783	21	83	66	1	DarkCorner	DarkCorner	8822.41	337.098	3.602785e+000	3.589747e+000	57	29	8.476533e+000	0	0	0	0	0	0	-4.85185	0	0	49.8279	29.5806
DATA	1784	21	84	66	1	DarkCorner	DarkCorner	8847.5	337	3.617895e+000	3.604802e+000	59	28	7.139868e+000	0	0	0	0	0	0	-2.0683	0	0	54.1152	26.8529
DATA	1785	21	85	66	1	DarkCorner	DarkCorner	8873.31	337.069	3.633000e+000	3.619852e+000	60	26	7.412351e+000	0	0	0	0	0	0	-1.6185	0	0	48.2044	26.325
DATA	1786	22	1	66	1	DarkCorner	DarkCorner	6752.16	343.377	3.150023e+000	3.138623e+000	57.5	28	7.493634e+000	0	0	0	0	0	0	-3.46866	0	0	49.8279	28.4
DATA	1787	22	2	66	1	DarkCorner	DarkCorner	6777.84	343.518	3.129270e+000	3.117945e+000	60	31.5	4.900392e+000	0	0	0	0	0	0	-5.31935	0	0	51.0895	30.4231
DATA	1788	22	3	66	1	DarkCorner	DarkCorner	6803.62	343.42	3.109835e+000	3.098581e+000	55	31	9.975575e+000	0	0	0	0	0	0	-7.34712	0	0	47.5395	32.3125
DATA	1789	22	4	0	0	A_42_P704824	NM_001009640	6828.44	343.733	2.175610e+002	2.197313e+001	268.5	29	9.510190e+000	0	0	0	0	0	0	207.281	1	1	49.1849	31.5909
DATA	1790	22	5	0	0	A_42_P517554	NM_001107060	6854.11	343.5	1.969250e+002	1.992941e+001	249	31	8.395664e+000	0	0	0	0	0	0	188.658	1	1	56.9804	31.8889
DATA	1791	22	6	0	0	A_42_P586883	NM_001106416	6879.02	343.277	6.353655e+001	7.047083e+000	125	31	5.595419e+000	0	0	0	0	0	0	61.1771	1	1	51.4001	29.9394
DATA	1792	22	7	0	0	A_64_P060302	BF559343	6904.89	343.5	3.337962e+002	3.351714e+001	390	32	9.740839e+000	0	0	0	0	0	0	323.022	1	1	65	34.4359
DATA	1793	22	8	0	0	A_64_P055418	NM_001025641	6930.33	343.5	2.021152e+001	3.633260e+000	83	31	1.054541e+001	0	0	0	0	0	0	19.6489	1	1	57.5363	33.9667
DATA	1794	22	9	0	0	A_44_P317600	NM_012612	6955.48	343.493	3.614421e+002	3.626904e+001	417.5	32	7.604769e+000	0	0	0	0	0	0	352.87	1	1	49.1849	32.7586
DATA	1795	22	10	0	0	A_44_P433359	NM_022710	6981.11	343.5	3.977005e+002	3.988262e+001	452	32.5	8.446470e+000	0	0	0	0	0	0	389.828	1	1	65	32.8333
DATA	1796	22	11	0	0	A_42_P788480	NM_019194	7006.16	343.566	8.950273e+003	8.950323e+002	8856.5	34	9.290935e+000	0	0	0	0	0	0	8805.14	1	1	49.5074	34.0526
DATA	1797	22	12	0	0	A_44_P269808	NM_001025281	7031.67	343.5	1.004841e+002	1.047911e+001	162	35	7.830985e+000	0	0	0	0	0	0	99.1904	1	1	57.5363	34.8108
DATA	1798	22	13	0	0	A_64_P108165	NM_001108889	7057.42	343.573	2.609186e+001	3.948848e+000	91	32.5	6.459067e+000	0	0	0	0	0	0	25.8375	1	1	57.5363	32.7333
DATA	1799	22	14	0	0	A_42_P581567	NM_001011899	7082.7	343.565	1.395500e+002	1.426459e+001	201	33	7.932504e+000	0	0	0	0	0	0	138.578	1	1	46.8651	34.2692
DATA	1800	22	15	0	0	A_42_P746029	NM_144748	7108.11	343.5	2.966776e+001	4.182574e+000	91.5	32.5	1.060320e+001	0	0	0	0	0	0	29.536	1	1	65	34.2353
DATA	1801	22	16	0	0	A_42_P481087	XM_232226	7133.06	343.611	1.601256e+003	1.601526e+002	1636	29	8.259171e+000	0	0	0	0	0	0	1597.76	1	1	48.2044	31.2941
DATA	1802	22	17	0	0	A_64_P031020	ENSRNOT00000032728	7158.67	343.5	2.946338e+000	2.941052e+000	64.5	28	9.345033e+000	0	0	0	0	0	0	1.77722	0	0	57.5363	32.6563
DATA	1803	22	18	0	0	A_44_P344228	NM_183051	7184.42	343.573	4.293092e+001	5.197884e+000	104	32	8.259492e+000	0	0	0	0	0	0	43.0003	1	1	57.5363	33.1724
DATA	1804	22	19	0	0	A_64_P009798	NM_021742	7209.58	343.573	2.936705e+000	2.926077e+000	64.5	34	7.691987e+000	0	0	0	0	0	0	-0.00662113	0	0	57.5363	32.6
DATA	1805	22	20	0	0	A_44_P775747	ENSRNOT00000051510	7235	343.545	3.029770e+004	3.029771e+003	30499.5	33	8.522708e+000	0	0	0	0	0	0	30429.4	1	1	55.8519	32.6452
DATA	1806	22	21	0	0	A_44_P349475	NM_031333	7260.38	343.556	1.329943e+003	1.330263e+002	1384	36	1.032416e+001	0	0	0	0	0	0	1337.07	1	1	48.2044	37
DATA	1807	22	22	0	0	A_64_P114198	NM_001080153	7285.61	343.594	2.789347e+003	2.789499e+002	2797.5	32	7.400816e+000	0	0	0	0	0	0	2806.43	1	1	47.5395	31.1852
DATA	1808	22	23	0	0	A_42_P719060	NM_001108994	7311.24	343.8	4.236529e+003	4.236630e+002	4208.5	36	1.001807e+001	0	0	0	0	0	0	4264.9	1	1	48.8603	38.1481
DATA	1809	22	24	0	0	A_44_P163243	NM_175759	7336.58	343.573	2.925492e+000	2.914904e+000	61.5	34	1.120859e+001	0	0	0	0	0	0	-1.73613	0	0	65	34.4848
DATA	1810	22	25	0	0	A_44_P156864	A_44_P156864	7362	343.545	1.316802e+002	1.348675e+001	193	33	9.178448e+000	0	0	0	0	0	0	132.603	1	1	55.8519	32.3902
DATA	1811	22	26	0	0	A_42_P758052	NM_001031645	7387.2	343.761	5.878549e+003	5.878621e+002	5874.5	29	8.434324e+000	0	0	0	0	0	0	5919.09	1	1	46.8651	32.2571
DATA	1812	22	27	0	0	A_44_P280659	NM_001100971	7412.39	343.8	6.494945e+001	7.119543e+000	128	33	6.773446e+000	0	0	0	0	0	0	65.374	1	1	49.1849	32.7097
DATA	1813	22	28	0	0	A_42_P768380	NM_001100158	7437.79	343.875	7.783034e+003	7.783089e+002	7721.5	32.5	6.241868e+000	0	0	0	0	0	0	7829.48	1	1	47.5395	31.2667
DATA	1814	22	29	0	0	A_44_P486312	NM_144737	7463.19	343.547	2.898550e+002	2.913223e+001	349	33.5	7.837436e+000	0	0	0	0	0	0	291.337	1	1	49.1849	33.9444
DATA	1815	22	30	0	0	A_64_P005288	XM_575125	7488.91	343.614	5.529932e+001	6.254973e+000	120	30	8.127968e+000	0	0	0	0	0	0	55.5272	1	1	57.259	29.7714
DATA	1816	22	31	0	0	A_64_P101885	ENSRNOT00000058341	7514.42	343.573	2.041489e+002	2.062360e+001	269.5	31	6.819978e+000	0	0	0	0	0	0	204.745	1	1	57.5363	31.0625
DATA	1817	22	32	0	0	A_64_P113645	ENSRNOT00000055538	7539.5	344	3.266290e+000	2.948500e+000	66	33.5	6.979941e+000	0	0	0	0	0	0	3.27164	1	0	54.1152	32.8571
DATA	1818	22	33	0	0	A_42_P588869	NM_001008348	7564.55	344.081	3.815469e+003	3.815582e+002	3699	28.5	8.880752e+000	0	0	0	0	0	0	3815.9	1	1	48.8603	29.4583
DATA	1819	22	34	0	0	A_64_P028027	NM_001000473	7590.5	344	3.917186e+001	4.897808e+000	101	35	8.515544e+000	0	0	0	0	0	0	39.106	1	1	65	34.5833
DATA	1820	22	35	0	0	A_42_P468805	NM_145721	7615.44	344.027	4.602452e+002	4.611869e+001	524	32	7.128996e+000	0	0	0	0	0	0	458.608	1	1	48.5334	32.125
DATA	1821	22	36	0	0	A_42_P522194	NM_012914	7640.56	344.027	1.911362e+002	1.934020e+001	250.5	31.5	5.593685e+000	0	0	0	0	0	0	190.063	1	1	48.5334	31.4688
DATA	1822	22	37	0	0	A_64_P002969	A_64_P002969	7666.5	344	8.140628e+000	3.068497e+000	67.5	33	9.036888e+000	0	0	0	0	0	0	8.07626	1	0	65	35.0357
DATA	1823	22	38	0	0	A_42_P453935	NM_001198580	7691.77	343.884	6.013631e+003	6.013704e+002	5858.5	31	8.430105e+000	0	0	0	0	0	0	5951.62	1	1	46.5243	32
DATA	1824	22	39	0	0	A_42_P523551	NM_001014087	7717.34	343.934	2.984203e+000	2.973403e+000	59	27	6.277199e+000	0	0	0	1	0	0	-3.38478	0	0	49.1849	27.375
DATA	1825	22	40	0	0	A_64_P046076	NM_053952	7742.49	344.055	2.343272e+003	2.343462e+002	2262	31	8.827961e+000	0	0	0	0	0	0	2306.95	1	1	48.5334	30.1364
DATA	1826	22	41	0	0	A_42_P607770	NM_001134616	7767.69	343.986	1.443293e+004	1.443296e+003	13520	29	5.001139e+000	0	0	0	0	0	0	14168.6	1	1	47.2035	28.3704
DATA	1827	22	42	0	0	A_64_P089400	NM_022605	7793.28	344.095	4.489710e+002	4.499715e+001	488.5	30.5	4.923508e+000	0	0	0	0	0	0	439.424	1	1	48.8603	30.7813
DATA	1828	22	43	0	0	A_64_P072064	FQ221714	7819	344	1.149928e+005	1.149928e+004	112564	36	1.492857e+001	0	0	0	0	0	0	112187	1	1	54.9904	40.0769
DATA	1829	22	44	0	0	A_42_P555125	NM_012913	7844.35	344.086	8.984555e+003	8.984606e+002	8597	35	1.482237e+001	0	0	0	0	0	0	8736.89	1	1	49.5074	39.0571
DATA	1830	22	45	0	0	A_42_P768776	NM_001108443	7869.57	343.897	7.367555e+003	7.367618e+002	7056	32	1.172197e+001	0	0	0	0	0	0	7140.02	1	1	46.5243	35.7308
DATA	1831	22	46	0	0	A_42_P593930	NM_001195606	7895.5	344	1.015843e+001	3.204798e+000	72	30	1.075977e+001	0	0	0	0	0	0	9.80956	1	0	54.1152	32.0909
DATA	1832	22	47	0	0	A_64_P013545	NM_001115046	7920.35	344	2.760063e+002	2.776868e+001	321.5	32.5	9.730331e+000	0	0	0	0	0	0	265.58	1	1	45.4864	33.625
DATA	1833	22	48	0	0	A_42_P548520	NM_001100834	7946.06	343.976	6.079877e+003	6.079954e+002	5742	32	1.127888e+001	0	0	0	0	0	0	5828.03	1	1	50.7771	34.8108
DATA	1834	22	49	0	0	A_42_P692317	NM_001107565	7971.08	344	9.995738e+002	1.000046e+002	986	31	8.157770e+000	0	0	0	0	0	0	954.546	1	1	46.8651	31.2778
DATA	1835	22	50	0	0	A_64_P078303	NM_001106526	7996.43	344.143	4.084033e+001	5.118656e+000	101	34	1.057400e+001	0	0	0	0	0	0	38.8482	1	1	47.5395	33.4286
DATA	1836	22	51	0	0	A_64_P031771	A_64_P031771	8022.23	344.296	5.204477e+001	6.056883e+000	111	36	1.229132e+001	0	0	0	0	0	0	49.3048	1	1	46.8651	36.92
DATA	1837	22	52	0	0	A_44_P393929	NM_001039713	8047.15	344.083	1.013405e+002	1.060081e+001	157	31	8.405241e+000	0	0	0	0	0	0	95.6122	1	1	46.8651	32.7143
DATA	1838	22	53	0	0	A_44_P135730	XM_228802	8073	344	1.769548e+002	1.796920e+001	229	31	8.354784e+000	0	0	0	0	0	0	166.235	1	1	54.9904	31.5625
DATA	1839	22	54	0	0	A_43_P23215	NM_001025737	8098	344	2.036364e+002	2.060395e+001	252	28	8.522752e+000	0	0	0	0	0	0	190.493	1	1	46.8651	31.1389
DATA	1840	22	55	0	0	A_64_P118427	A_64_P118427	8123.58	344.427	1.112301e+002	1.156077e+001	165	28.5	8.623860e+000	0	0	0	0	0	0	103.603	1	1	57.5363	30.375
DATA	1841	22	56	0	0	A_64_P075560	NM_001037526	8149.42	344.427	2.696466e+001	4.158262e+000	87	30	8.119669e+000	0	0	0	0	0	0	25.0027	1	1	57.5363	30.0645
DATA	1842	22	57	0	0	A_64_P150311	NM_177935	8174.5	344.352	5.099034e+001	6.009170e+000	110	32	8.697378e+000	0	0	0	0	0	0	47.0699	1	1	57.5363	30.8529
DATA	1843	22	58	0	0	A_44_P272393	NM_001106892	8200	344.455	4.082825e+001	5.183809e+000	98	32	9.048648e+000	0	0	0	0	0	0	37.518	1	1	55.8519	31.1563
DATA	1844	22	59	0	0	A_44_P421887	NM_001191565	8225.14	344.208	2.455817e+002	2.476693e+001	281.5	31	7.700097e+000	0	0	0	0	0	0	224.631	1	1	47.5395	31.1538
DATA	1845	22	60	0	0	A_64_P045102	A_64_P045102	8250.71	344.246	2.981996e+003	2.982170e+002	2854	31.5	9.927103e+000	0	0	0	0	0	0	2714.88	1	1	45.1352	33.0313
DATA	1846	22	61	0	0	A_42_P818546	NM_001191600	8275.93	343.883	8.263305e+002	8.269651e+001	795.5	30	8.296107e+000	0	0	0	0	0	0	748.748	1	1	44.4243	30.5556
DATA	1847	22	62	0	0	A_42_P777445	ENSRNOT00000012684	8301.58	344.427	7.654107e+001	8.317235e+000	135	32.5	9.497584e+000	0	0	0	0	0	0	69.0328	1	1	57.5363	34.0882
DATA	1848	22	63	0	0	A_64_P111709	NM_001000554	8327	344.455	2.320889e+002	2.343811e+001	274	32	7.669185e+000	0	0	0	0	0	0	208.329	1	1	55.8519	31.8235
DATA	1849	22	64	0	0	A_64_P107509	NM_001191874	8352.42	344.427	6.296300e+001	7.102027e+000	117	31	7.064644e+000	0	0	0	0	0	0	56.2467	1	1	65	28.7667
DATA	1850	22	65	0	0	A_64_P121836	ENSRNOT00000007828	8377.58	344.427	3.472953e+001	4.791669e+000	92.5	33	8.798903e+000	0	0	0	0	0	0	30.8775	1	1	57.5363	33.6
DATA	1851	22	66	0	0	A_42_P684281	XR_008784	8403.11	344.5	2.370357e+003	2.370589e+002	2067	37.5	1.086522e+001	0	0	0	0	0	0	2097.3	1	1	56.9804	38.1429
DATA	1852	22	67	0	0	A_64_P060804	ENSRNOT00000000462	8428.5	344.5	5.939495e+001	6.810931e+000	113	35	1.078156e+001	0	0	0	0	0	0	52.2998	1	1	57.5363	36.875
DATA	1853	22	68	0	0	A_64_P075675	A_64_P075675	8453.89	344.5	3.819872e+002	3.834529e+001	402	31	6.202455e+000	0	0	0	0	0	0	334.735	1	1	56.9804	31.5517
DATA	1854	22	69	0	0	A_44_P254973	NM_198051	8479.35	343.93	5.742883e+001	6.656740e+000	113	31	9.378468e+000	0	0	0	0	0	0	50.0746	1	1	47.5395	32.2069
DATA	1855	22	70	0	0	A_42_P492976	NM_001126099	8504.56	344.028	3.508604e+002	3.524869e+001	360	28.5	7.079516e+000	0	0	0	0	0	0	304.476	1	1	48.2044	28.8667
DATA	1856	22	71	0	0	A_42_P619114	NM_001014204	8530.11	344.5	3.353570e+001	4.774400e+000	91	29.5	6.838442e+000	0	0	0	0	0	0	28.9652	1	1	56.9804	28.25
DATA	1857	22	72	0	0	A_42_P541625	NM_001126090	8555.56	344.266	3.022966e+004	3.022968e+003	25424.5	31	7.895062e+000	0	0	0	0	0	0	25983	1	1	50.7771	30.4643
DATA	1858	22	73	0	0	A_42_P469136	NM_001044288	8580.59	344.3	1.249271e+003	1.249742e+002	1089	32.5	1.164420e+001	0	0	0	1	0	0	1068.75	1	1	47.2035	34.5714
DATA	1859	22	74	0	0	A_64_P101480	ENSRNOT00000034261	8606.42	344.427	7.257893e+001	8.035016e+000	122	36	1.216860e+001	0	0	0	0	0	0	61.7947	1	1	57.5363	37.8333
DATA	1860	22	75	0	0	A_64_P078554	ENSRNOT00000020079	8631.39	344.638	4.245989e+002	4.260089e+001	418	28	9.329931e+000	0	0	0	0	0	0	359.861	1	1	47.5395	31.381
DATA	1861	22	76	0	0	A_44_P131067	ENSRNOT00000045483	8657.11	344.5	2.015569e+001	4.021298e+000	79	28	6.785060e+000	0	0	0	0	0	0	17.0015	1	1	56.9804	27.037
DATA	1862	22	77	0	0	A_64_P055699	ENSRNOT00000010871	8682.37	344.206	1.702427e+003	1.702786e+002	1446	31	1.011219e+001	0	0	0	0	0	0	1429.31	1	1	46.8651	30.5556
DATA	1863	22	78	0	0	A_64_P117203	NM_001106002	8707.63	344.486	1.793438e+004	1.793441e+003	14732	24.5	9.646043e+000	0	0	0	0	0	0	14990.1	1	1	48.2044	28.6154
DATA	1864	22	79	0	0	A_44_P357870	NM_031559	8733.16	344.434	2.883047e+002	2.904549e+001	296	28.5	6.854532e+000	0	0	0	1	0	0	239.881	1	1	49.5074	28.7692
DATA	1865	22	80	0	0	A_42_P732101	NM_022624	8758.5	344.5	9.867633e+003	9.867697e+002	7957	28.5	9.856376e+000	0	0	0	0	0	0	8174.04	1	1	49.1849	29.5
DATA	1866	22	81	0	0	A_64_P155054	XM_001062835	8784.11	344.5	7.201486e+001	8.032913e+000	121	34.5	9.950685e+000	0	0	0	0	0	0	59.392	1	1	56.9804	34.625
DATA	1867	22	82	0	0	A_44_P534154	NM_001108852	8809.38	344.93	6.427368e+001	7.354130e+000	113	29.5	7.775660e+000	0	0	0	0	0	0	52.7875	1	1	48.2044	30.8421
DATA	1868	22	83	66	1	DarkCorner	DarkCorner	8834.67	344.5	3.602373e+000	3.589335e+000	55	27.5	5.506228e+000	0	0	0	0	0	0	-4.63093	0	0	57.5363	27.0625
DATA	1869	22	84	66	1	DarkCorner	DarkCorner	8860.49	344.644	3.617428e+000	3.604336e+000	53	28.5	8.398413e+000	0	0	0	0	0	0	-7.67322	0	0	48.5334	29.4667
DATA	1870	22	85	66	1	DarkCorner	DarkCorner	8885.58	344.589	3.631991e+000	3.622296e+000	61.5	26	6.637310e+000	0	0	0	0	0	0	1.2818	0	0	48.5334	26.1727
DATA	1871	23	1	66	1	DarkCorner	DarkCorner	6739.34	350.282	3.155001e+000	3.143583e+000	61	26	7.124910e+000	0	0	0	0	0	0	-2.51171	0	0	47.8731	26.7368
DATA	1872	23	2	66	1	DarkCorner	DarkCorner	6764.84	350.857	3.133576e+000	3.122236e+000	59	32	7.040101e+000	0	0	0	0	0	0	-4.25386	0	0	48.8603	29.7143
DATA	1873	23	3	66	1	DarkCorner	DarkCorner	6790.11	350.85	3.114000e+000	3.102730e+000	58	30	8.089111e+000	0	0	0	0	0	0	-3.52649	0	0	50.4627	31.0606
DATA	1874	23	4	0	0	A_44_P246268	NM_001106862	6816	350.545	2.633667e+001	4.055629e+000	88	27	6.995565e+000	0	0	0	0	0	0	25.0644	1	1	55.8519	27.4
DATA	1875	23	5	0	0	A_64_P028396	ENSRNOT00000051835	6841.5	350.97	5.112627e+001	5.961688e+000	111	33	8.408924e+000	0	0	0	0	0	0	48.938	1	1	44.4243	34.28
DATA	1876	23	6	0	0	A_64_P020451	XM_219275	6866.65	350.778	3.822487e+001	4.890440e+000	102	28.5	6.831301e+000	0	0	0	0	0	0	36.7806	1	1	47.5395	29.3333
DATA	1878	23	8	0	0	A_64_P106264	ENSRNOT00000029671	6917.5	350.788	2.113648e+003	2.113864e+002	2135	30	1.073843e+001	0	0	0	0	0	0	2053.66	1	1	46.5243	32.7742
DATA	1879	23	9	0	0	A_44_P524805	NM_214832	6943	350.545	3.305000e+001	4.468734e+000	92.5	34	1.008952e+001	0	0	0	0	0	0	32.2523	1	1	55.8519	35.7143
DATA	1880	23	10	0	0	A_42_P764228	NM_031707	6968.1	351.132	6.025341e+003	6.025415e+002	5938	31	6.887121e+000	0	0	0	0	0	0	5904.56	1	1	46.8651	31.8919
DATA	1881	23	11	0	0	A_44_P533760	NM_182843	6993.54	351.214	1.491551e+003	1.491849e+002	1510.5	29	1.087422e+001	0	0	0	0	0	0	1467.26	1	1	47.2035	32.9655
DATA	1882	23	12	0	0	A_42_P524610	NM_001108992	7019.03	351.254	3.267603e+003	3.267738e+002	3193	33	8.168849e+000	0	0	0	0	0	0	3225.75	1	1	46.8651	32.4872
DATA	1883	23	13	0	0	A_42_P570756	NM_134345	7044.5	350.648	1.268393e+005	1.268393e+004	125563	35	6.806227e+000	0	0	0	0	0	0	125604	1	1	57.5363	34.4839
DATA	1884	23	14	0	0	A_44_P362969	NM_053688	7069.91	350.614	4.729514e+001	5.576941e+000	110	35	8.756177e+000	0	0	0	0	0	0	46.9722	1	1	57.259	35.3214
DATA	1885	23	15	0	0	A_44_P308197	NM_001012190	7095.12	350.733	3.504780e+003	3.504904e+002	3496	33	9.993843e+000	0	0	0	0	0	0	3490.17	1	1	52.3208	34.7576
DATA	1886	23	16	0	1	ETG05_36762	ETG05_36762	7120.58	350.573	5.810990e+001	6.512596e+000	119	30	8.138479e+000	0	0	0	0	0	0	58.005	1	1	57.5363	32.1212
DATA	1887	23	17	0	0	A_42_P744033	NM_001100846	7146.39	350.931	2.952167e+002	2.966710e+001	359	35.5	8.938635e+000	0	0	0	0	0	0	295.344	1	1	53.8203	34.1875
DATA	1888	23	18	0	0	A_42_P726363	NM_031536	7171.5	351	2.453118e+001	3.820150e+000	87.5	32	9.242421e+000	0	0	0	0	0	0	24.5874	1	1	54.1152	33.8788
DATA	1889	23	19	0	0	A_64_P010393	NM_053363	7196.5	351	5.237868e+003	5.237950e+002	5187.5	31	7.153088e+000	0	0	0	0	0	0	5258.21	1	1	48.5334	31.4
DATA	1890	23	20	0	0	A_42_P612220	NM_001191711	7222.5	351	1.161492e+003	1.161859e+002	1229.5	33	8.785063e+000	0	0	0	0	0	0	1167.63	1	1	54.1152	32.9655
DATA	1891	23	21	0	0	A_44_P393551	NM_012567	7247.5	351	3.953326e+004	3.953327e+003	39690	34	8.874189e+000	0	0	0	0	0	0	39785.5	1	1	54.1152	35.5862
DATA	1892	23	22	0	0	A_44_P278688	NM_053682	7273	351	2.023322e+003	2.023532e+002	2065	32	9.583331e+000	0	0	0	0	0	0	2038.01	1	1	46.8651	32.5667
DATA	1893	23	23	0	0	A_44_P186989	NM_001000076	7298.33	350.803	1.590598e+001	3.318333e+000	80	32	9.915783e+000	0	0	0	0	0	0	16.0309	1	1	45.4864	34.7857
DATA	1894	23	24	0	0	A_42_P640277	NM_001003401	7323.91	350.935	4.771206e+004	4.771206e+003	48070	38	1.045539e+001	0	0	0	0	0	0	48107.5	1	1	54.4085	39.6207
DATA	1895	23	25	0	0	A_44_P398792	NM_053867	7349.09	351.104	1.445464e+004	1.445467e+003	14571.5	31	8.318517e+000	0	0	0	0	0	0	14577.4	1	1	46.8651	31.2105
DATA	1896	23	26	0	0	A_64_P052552	ENSRNOT00000056797	7374.81	350.772	1.240168e+002	1.273869e+001	188	30	6.688239e+000	0	0	0	0	0	0	125.055	1	1	49.1849	30.8056
DATA	1897	23	27	0	0	A_64_P119254	NM_001013202	7400	351	2.922003e+000	2.914999e+000	65	31	6.007754e+000	0	0	0	0	0	0	1.45416	0	0	54.9904	31.9
DATA	1898	23	28	0	0	A_64_P159614	NM_053614	7425.09	351.104	5.235710e+003	5.235791e+002	5260	33	7.500379e+000	0	0	0	0	0	0	5275.97	1	1	46.8651	32.4545
DATA	1899	23	29	0	0	A_42_P814107	NM_001024750	7450.53	350.871	1.784149e+002	1.807804e+001	243	33	7.376373e+000	0	0	0	0	0	0	179.655	1	1	47.8731	33.7941
DATA	1900	23	30	0	0	A_64_P150751	NM_212494	7476.21	350.948	5.524749e+002	5.532446e+001	605.5	30	7.297976e+000	0	0	0	0	0	0	555.822	1	1	49.1849	30.9487
DATA	1902	23	32	0	0	A_44_P838888	ENSRNOT00000038829	7526.84	350.912	7.270243e+001	7.836364e+000	135.5	33	8.350134e+000	0	0	0	0	0	0	72.9695	1	1	46.5243	33.5161
DATA	1903	23	33	0	0	A_43_P12927	NM_053769	7552.41	351.084	1.598138e+002	1.624751e+001	220	30.5	1.128543e+001	0	0	0	0	0	0	160.169	1	1	48.2044	31.4667
DATA	1904	23	34	0	0	A_64_P140806	A_64_P140806	7577.61	351.069	4.518707e+004	4.518708e+003	44646.5	34.5	7.540251e+000	0	0	0	0	0	0	45213	1	1	53.8203	33.1538
DATA	1905	23	35	0	0	A_42_P607026	NM_001106839	7602.86	351.192	8.601583e+003	8.601633e+002	8324	32	1.087377e+001	0	0	0	0	0	0	8591.07	1	1	47.5395	30.8966
DATA	1906	23	36	0	0	A_44_P272186	NM_001107950	7628.31	351	2.950033e+001	4.168248e+000	91.5	34	9.488391e+000	0	0	0	0	0	0	29.4041	1	1	47.2035	34.6207
DATA	1907	23	37	0	0	A_44_P226658	NM_017046	7653.85	351.028	5.443111e+001	6.191682e+000	116	34	7.682983e+000	0	0	0	0	0	0	54.1355	1	1	46.8651	34.0625
DATA	1908	23	38	0	0	A_64_P119279	NM_001108109	7679.09	351.104	2.033022e+004	2.033024e+003	20412	32	7.828435e+000	0	0	0	0	0	0	20173.2	1	1	46.8651	32.6071
DATA	1909	23	39	0	0	A_44_P1042876	NM_212504	7704.5	351.056	1.854834e+003	1.855071e+002	1883.5	31.5	1.010225e+001	0	0	0	0	0	0	1835.91	1	1	48.5334	32.5938
DATA	1910	23	40	0	0	A_64_P119607	ENSRNOT00000037601	7730.42	351.427	2.171204e+002	2.191467e+001	276	30.5	7.921718e+000	0	0	0	0	0	0	214.341	1	1	65	31.3333
DATA	1911	23	41	0	0	A_42_P784252	NM_133557	7755.26	351.289	1.671700e+004	1.671703e+003	16389	31	1.011602e+001	0	0	0	0	0	0	16457.5	1	1	49.5074	31.5769
DATA	1912	23	42	0	0	A_44_P1033194	NM_139328	7780.82	351.341	5.625560e+003	5.625639e+002	5582	31	4.354734e+000	0	0	0	0	0	0	5521.95	1	1	52.0157	31.0625
DATA	1913	23	43	0	0	A_42_P800048	NM_207610	7806.37	351.5	8.885621e+003	8.885672e+002	8665	33	7.470016e+000	0	0	0	0	0	0	8695.31	1	1	52.3208	33.3636
DATA	1914	23	44	0	0	A_43_P11525	NM_012710	7831.58	351.427	6.629701e+001	7.280589e+000	125.5	37	1.761237e+001	0	0	0	0	0	0	64.67	1	1	57.5363	41.9355
DATA	1915	23	45	0	0	A_64_P019037	NM_001013886	7857.42	351.427	6.258700e+004	6.258701e+003	59605	33	8.937936e+000	0	0	0	0	0	0	60844.4	1	1	57.5363	34.6207
DATA	1916	23	46	0	0	A_64_P003378	NM_001024336	7882.33	351.697	3.705470e+002	3.717832e+001	428	34	1.280203e+001	0	0	0	0	0	0	359.03	1	1	49.5074	36.7273
DATA	1917	23	47	0	0	A_44_P258855	NM_053431	7907.7	351.1	5.500760e+003	5.500844e+002	5236	36	2.186017e+001	0	0	0	0	0	0	5310.19	1	1	47.2035	42.9375
DATA	1918	23	48	0	1	ETG09_35454	ETG09_35454	7933.42	351.427	8.441854e+000	3.166263e+000	70	33	8.506263e+000	0	0	0	0	0	0	8.11958	1	0	57.5363	33.6471
DATA	1919	23	49	0	0	A_64_P089677	NM_001105977	7958.58	351.427	1.273029e+002	1.309363e+001	183	30	1.221099e+001	0	0	0	0	0	0	121.984	1	1	57.5363	33.5862
DATA	1920	23	50	0	0	A_64_P013609	A_64_P013609	7984.33	351.5	9.445231e+000	3.216978e+000	71	34	1.070254e+001	0	0	0	0	0	0	9.0151	1	0	57.5363	35.1875
DATA	1921	23	51	0	0	A_44_P357470	NM_030849	8009.25	351.627	1.095400e+003	1.095835e+002	1088	35	1.061320e+001	0	0	0	0	0	0	1041.46	1	1	49.1849	34
DATA	1922	23	52	0	0	A_44_P404064	ENSRNOT00000015387	8034.24	351.5	1.028138e+003	1.028605e+002	1019.5	28	8.997984e+000	0	0	0	0	0	0	973.573	1	1	49.1849	30.4375
DATA	1923	23	53	0	0	A_64_P092167	A_64_P092167	8060.34	351.338	3.923246e+001	5.008284e+000	96	31.5	8.044707e+000	0	0	0	0	0	0	36.9905	1	1	46.5243	31.725
DATA	1924	23	54	0	0	A_42_P463036	ENSRNOT00000038596	8085.57	351.392	5.817247e+003	5.817331e+002	5385.5	32	1.003551e+001	0	0	0	1	0	0	5461.81	1	1	49.1849	32.4348
DATA	1925	23	55	0	0	A_44_P1003794	NM_012576	8111.04	351.174	2.422345e+003	2.422549e+002	2323	30	6.328297e+000	0	0	0	0	0	0	2264.4	1	1	46.8651	31.1212
DATA	1926	23	56	0	0	A_64_P099006	BC105831	8136.31	351.029	3.165175e+000	3.163306e+000	65	31	8.677039e+000	0	0	0	0	0	0	2.29031	0	0	46.5243	29.5714
DATA	1927	23	57	0	0	A_42_P795467	NM_001108055	8161.56	351.479	2.578341e+002	2.597723e+001	306	31	8.676687e+000	0	0	0	0	0	0	238.928	1	1	48.2044	30.8519
DATA	1928	23	58	0	0	A_42_P629321	NM_031590	8187.42	351.427	7.041832e+001	7.727398e+000	129	32	8.541217e+000	0	0	0	0	0	0	64.955	1	1	65	32.7143
DATA	1929	23	59	0	0	A_42_P549786	NM_022609	8212.37	351.63	5.635481e+003	5.635572e+002	5077	30	6.255320e+000	0	0	0	0	0	0	5175.22	1	1	48.2044	29.9355
DATA	1930	23	60	0	0	A_64_P006354	ENSRNOT00000043959	8238.11	351.5	6.039104e+001	6.839810e+000	120	31	7.530666e+000	0	0	0	0	0	0	55.1984	1	1	56.9804	32.3714
DATA	1931	23	61	0	0	A_64_P057109	A_64_P057109	8263.15	351.348	1.685200e+003	1.685509e+002	1570.5	31	8.938478e+000	0	0	0	0	0	0	1533.19	1	1	46.8651	30.7838
DATA	1932	23	62	0	0	A_44_P101361	NM_032070	8288.67	351.5	1.072578e+001	3.414163e+000	73	30	7.895907e+000	0	0	0	0	0	0	9.71268	1	0	65	31.3514
DATA	1933	23	63	0	0	A_64_P103354	ENSRNOT00000066893	8313.94	351.464	1.061826e+003	1.062325e+002	997	33.5	7.531085e+000	0	0	0	0	0	0	957.008	1	1	47.5395	32.2
DATA	1934	23	64	0	0	A_42_P746868	NM_001127580	8339.5	351.5	3.844507e+004	3.844508e+003	34022.5	28	6.399661e+000	0	0	0	0	0	0	34484.8	1	1	57.5363	29.2069
DATA	1935	23	65	0	0	A_42_P707838	NM_012979	8364.56	351.468	2.900151e+003	2.900337e+002	2564.5	32	9.301759e+000	0	0	0	0	0	0	2589.15	1	1	49.8279	31.9091
DATA	1936	23	66	0	0	A_42_P628098	NM_001107991	8390.24	351.529	1.505493e+003	1.505855e+002	1383	32	8.389385e+000	0	0	0	0	0	0	1337.56	1	1	47.2035	33.1034
DATA	1937	23	67	0	0	A_64_P028071	ENSRNOT00000042928	8415.67	351.5	2.743811e+005	2.743811e+004	242547	43	1.480308e+001	0	0	0	0	1	0	242604	1	1	57.5363	46.7419
DATA	1938	23	68	0	0	A_64_P002944	A_64_P002944	8441.31	351.766	1.240722e+004	1.240727e+003	11123	35	9.464652e+000	0	0	0	0	0	0	10917.8	1	1	49.8279	35.0313
DATA	1939	23	69	0	0	A_64_P072159	XM_574060	8466.5	351.5	2.765172e+001	4.345154e+000	88	31	7.984437e+000	0	0	0	0	0	0	24.2149	1	1	57.5363	32.4138
DATA	1940	23	70	0	0	A_64_P052365	NM_001109318	8492.09	351.75	2.968771e+002	2.987812e+001	335	31	7.968081e+000	0	0	0	0	0	0	258.737	1	1	45.835	31.9032
DATA	1941	23	71	0	0	A_64_P023150	ENSRNOT00000042777	8517.25	351.569	2.261267e+002	2.286447e+001	261	27.5	7.484006e+000	0	0	0	0	0	0	196.133	1	1	45.4864	29.7
DATA	1942	23	72	0	0	A_44_P374902	NM_133429	8542.58	351.573	5.157257e+002	5.168454e+001	505.5	31	7.884416e+000	0	0	0	0	0	0	445.191	1	1	57.5363	29.6429
DATA	1943	23	73	0	0	A_44_P163271	NM_198733	8568.33	351.5	6.578757e+000	3.479464e+000	68	29	8.261961e+000	0	0	0	0	0	0	5.65154	1	0	57.5363	28.52
DATA	1944	23	74	0	0	A_42_P548520	NM_001100834	8593.61	351.577	6.235782e+003	6.235876e+002	5259	33	9.126443e+000	0	0	0	0	0	0	5331.84	1	1	47.8731	33.8667
DATA	1945	23	75	0	0	A_64_P012154	XM_225935	8619	351.545	2.748458e+001	4.410154e+000	84.5	27	7.147727e+000	0	0	0	0	0	0	23.39	1	1	55.8519	28.44
DATA	1946	23	76	0	0	A_64_P033574	NM_001000606	8644.42	351.573	3.477674e+000	3.467136e+000	62.5	28	9.036961e+000	0	0	0	0	0	0	1.00936	0	0	57.5363	28.2
DATA	1947	23	77	0	0	A_64_P027764	NM_022685	8669.65	351.681	1.327665e+002	1.372539e+001	172	29	8.154390e+000	0	0	0	0	0	0	111.95	1	1	46.8651	29.3043
DATA	1948	23	78	0	0	A_42_P484738	NM_022266	8695.48	351.725	1.850245e+003	1.850575e+002	1581	25	8.817394e+000	0	0	0	0	0	0	1552.92	1	1	46.8651	27.1481
DATA	1949	23	79	0	0	A_64_P036355	NM_053311	8720.54	351.614	1.966882e+004	1.966885e+003	16228.5	25	1.419984e+001	0	0	0	0	0	0	16434.2	1	1	47.5395	32.7241
DATA	1950	23	80	0	0	A_42_P694928	NM_001109046	8746	351.545	4.024692e+002	4.040131e+001	391	28	7.364255e+000	0	0	0	0	0	0	334.776	1	1	55.8519	28.0323
DATA	1951	23	81	0	0	A_42_P588738	NM_133542	8771.42	351.573	8.312175e+001	9.036227e+000	126.5	34.5	1.011678e+001	0	0	0	0	0	0	68.8384	1	1	65	33.8571
DATA	1952	23	82	0	0	A_64_P141254	XM_001060542	8796.53	352.479	4.752076e+001	5.936727e+000	102	31	9.878629e+000	0	0	0	0	0	0	39.1971	1	1	47.8731	32.5714
DATA	1953	23	83	0	0	A_42_P546054	NM_001013873	8821.97	352.232	3.588817e+002	3.606568e+001	349.5	28	7.697894e+000	0	0	0	1	0	0	294.744	1	1	46.5243	28.5152
DATA	1954	23	84	66	1	DarkCorner	DarkCorner	8848	352.353	3.602038e+000	3.589002e+000	55	29	6.654345e+000	0	0	0	0	0	0	-5.48528	0	0	46.1809	29.303
DATA	1955	23	85	66	1	DarkCorner	DarkCorner	8873.34	351.815	3.617272e+000	3.604488e+000	60	30	9.099715e+000	0	0	0	0	0	0	0.382737	0	0	45.4864	30.027
DATA	1956	24	1	66	1	DarkCorner	DarkCorner	6752.49	357.947	3.137792e+000	3.126436e+000	58.5	28	6.792279e+000	0	0	0	0	0	0	-3.92741	0	0	48.5334	27.3191
DATA	1957	24	2	66	1	DarkCorner	DarkCorner	6778.39	357.743	3.117461e+000	3.106179e+000	57	32	9.159984e+000	0	0	0	0	0	0	-7.16867	0	0	47.8731	31.303
DATA	1958	24	3	0	0	A_64_P000371	NM_017308	6803	358	1.329057e+003	1.329415e+002	1336	31	8.032183e+000	0	0	0	0	0	0	1263.4	1	1	46.8651	31.1143
DATA	1959	24	4	0	0	A_42_P772356	NM_001191597	6828.43	358.157	6.925454e+003	6.925522e+002	6708	32	7.779455e+000	0	0	0	0	0	0	6621.78	1	1	47.5395	32.5417
DATA	1961	24	6	0	0	A_42_P470757	NM_001004075	6879.25	358	5.198431e+003	5.198519e+002	4964	31.5	7.693483e+000	0	0	0	0	0	0	5023.28	1	1	49.1849	31.8056
DATA	1962	24	7	0	0	A_64_P034250	ENSRNOT00000041464	6904.9	358.137	7.304559e+001	7.905239e+000	136.5	31	1.007500e+001	0	0	0	0	0	0	70.9318	1	1	46.8651	32.5455
DATA	1963	24	8	0	0	A_64_P065063	NM_012954	6930.5	358	8.826805e+001	9.325579e+000	147	29	6.438034e+000	0	0	0	0	0	0	86.1024	1	1	54.1152	30.3448
DATA	1964	24	9	0	0	A_64_P088866	ENSRNOT00000049194	6955.58	358.427	4.703907e+002	4.713439e+001	523	32.5	9.876304e+000	0	0	0	0	0	0	460.81	1	1	57.5363	34.9
DATA	1965	24	10	0	0	A_44_P111759	NM_001000956	6981.09	358.386	9.285571e+000	3.125539e+000	72	28	7.009328e+000	0	0	0	0	0	0	9.13227	1	0	57.259	29.5455
DATA	1966	24	11	0	0	A_64_P045019	ENSRNOT00000032417	7006.32	358.427	1.870420e+003	1.870656e+002	1917.5	30	1.020809e+001	0	0	0	0	0	0	1846.21	1	1	51.0895	33.1714
DATA	1967	24	12	0	0	A_64_P138989	XM_001053562	7031.82	358.43	9.065468e+001	9.537614e+000	153	34.5	7.270565e+000	0	0	0	0	0	0	89.7822	1	1	50.1463	34.25
DATA	1968	24	13	0	0	A_42_P537715	NM_001025743	7057.05	358.123	3.294897e+003	3.295029e+002	3248.5	34	8.136005e+000	0	0	0	0	0	0	3272.92	1	1	46.8651	34.1379
DATA	1969	24	14	0	0	A_42_P453171	NM_001107063	7082.26	358.194	2.144306e+003	2.144508e+002	2103	32	9.163336e+000	0	0	0	0	0	0	2135.94	1	1	47.5395	34.0313
DATA	1971	24	16	0	0	A_64_P096157	ENSRNOT00000059486	7133.42	358.427	2.463396e+002	2.480788e+001	309	31	9.880213e+000	0	0	0	0	0	0	246.569	1	1	65	33.2162
DATA	1972	24	17	0	0	A_43_P10076	NM_031665	7158.47	358.457	1.646635e+004	1.646638e+003	16371	34	1.016332e+001	0	0	0	0	0	0	16514	1	1	50.4627	33.5
DATA	1974	24	19	0	0	A_42_P772878	NM_001011936	7209.25	358.413	3.174346e+003	3.174480e+002	3176	32.5	7.716232e+000	0	0	0	0	0	0	3193.71	1	1	48.8603	33.3333
DATA	1976	24	21	0	0	A_44_P447394	NM_019193	7259.99	358.229	9.057065e+003	9.057112e+002	8981	32	8.146292e+000	0	0	0	0	0	0	9132.07	1	1	46.8651	32.8276
DATA	1977	24	22	0	0	A_42_P504250	NM_001134987	7285.41	358.254	1.563730e+003	1.564001e+002	1638	31	6.102459e+000	0	0	0	0	0	0	1577.86	1	1	47.5395	30.64
DATA	1978	24	23	0	0	A_42_P675802	NM_145777	7311.12	358.387	4.206186e+003	4.206286e+002	4158	31	8.446141e+000	0	0	0	0	0	0	4246.48	1	1	49.1849	32.8214
DATA	1979	24	24	0	0	A_64_P111843	XM_001074913	7336.15	358.419	1.442350e+003	1.442643e+002	1501.5	35	1.158018e+001	0	0	0	0	0	0	1456.57	1	1	48.5334	35.2143
DATA	1980	24	25	0	0	A_44_P118724	NM_019361	7361.63	358.64	1.076529e+004	1.076533e+003	10691.5	31	7.870522e+000	0	0	0	0	0	0	10872.5	1	1	48.8603	31.1707
DATA	1981	24	26	0	0	A_43_P21749	NM_001108329	7387.14	358.645	4.731052e+001	5.552631e+000	108.5	28	6.435589e+000	0	0	0	0	0	0	47.7738	1	1	49.8279	30.3714
DATA	1982	24	27	0	0	A_43_P11879	NM_017250	7412.67	358.5	6.444951e+001	7.070586e+000	130.5	32	9.071789e+000	0	0	0	0	0	0	65.0538	1	1	57.5363	33.1212
DATA	1983	24	28	0	0	A_64_P023182	NM_001000033	7438.33	358.5	8.062786e+000	3.019274e+000	69	33	7.632637e+000	0	0	0	0	0	0	8.13351	1	0	57.5363	31.9143
DATA	1985	24	30	0	0	A_44_P368461	NM_001107085	7488.89	358.5	1.487036e+001	3.272231e+000	78	30	7.146546e+000	0	0	0	0	0	0	14.974	1	1	56.9804	29.8387
DATA	1986	24	31	0	0	A_64_P097257	A_64_P097257	7514.5	358.5	1.079004e+002	1.117773e+001	173.5	30	6.436914e+000	0	0	0	0	0	0	108.522	1	1	57.5363	29.2143
DATA	1987	24	32	0	0	A_64_P100634	NM_001100171	7539.67	358.5	3.727786e+002	3.739223e+001	445	31.5	9.178636e+000	0	0	0	0	0	0	374.415	1	1	57.5363	30.6071
DATA	1988	24	33	0	0	A_64_P041902	NM_001025653	7565.33	358.5	4.539663e+003	4.539757e+002	4556	33	8.877519e+000	0	0	0	0	0	0	4552.38	1	1	57.5363	31.8966
DATA	1990	24	35	0	0	A_64_P116171	NM_001004266	7615.89	358.5	1.601241e+002	1.627965e+001	225	31	1.126796e+001	0	0	0	0	0	0	159.988	1	1	56.9804	32.2432
DATA	1991	24	36	0	0	A_44_P243279	NM_001134780	7640.94	358.768	3.527353e+002	3.539613e+001	409	32	5.161797e+000	0	0	0	0	0	0	351.729	1	1	46.5243	31.5313
DATA	1992	24	37	0	0	A_64_P151468	XM_001062494	7666.58	358.573	2.435920e+001	3.826007e+000	86	33	1.505844e+001	0	0	0	0	0	0	24.2336	1	1	57.5363	36.44
DATA	1993	24	38	0	0	A_64_P075769	ENSRNOT00000043984	7692.12	358.582	4.751791e+003	4.751883e+002	4924.5	33	9.355883e+000	0	0	0	0	0	0	4715.85	1	1	46.1809	34.1944
DATA	1994	24	39	0	0	A_42_P508921	NM_031703	7717.5	358.5	6.405014e+000	3.033550e+000	69	33	9.721844e+000	0	0	0	0	0	0	6.34019	1	0	57.5363	33.9706
DATA	1995	24	40	0	0	A_44_P503376	NM_001000274	7742.67	358.5	2.983950e+000	2.975697e+000	65	31	1.171537e+001	0	0	0	0	0	0	1.21485	0	0	57.5363	31.75
DATA	1996	24	41	0	0	A_64_P093088	NM_001000816	7768.42	358.573	4.792571e+001	5.644426e+000	105	31	4.209269e+000	0	0	0	0	0	0	47.1768	1	1	57.5363	30.5556
DATA	1997	24	42	0	0	A_44_P489608	NM_023967	7793.58	358.573	1.741931e+002	1.767417e+001	234.5	31	5.091751e+000	0	0	0	0	0	0	170.962	1	1	57.5363	30.8148
DATA	1998	24	43	0	0	A_44_P213088	ENSRNOT00000037507	7819	358.545	4.270612e+001	5.219033e+000	106.5	36.5	1.926480e+001	0	0	0	0	0	0	41.7826	1	1	65	44.1944
DATA	1999	24	44	0	0	A_64_P060725	NM_001025278	7844.42	358.573	1.720231e+001	3.466733e+000	80	32	9.855333e+000	0	0	0	0	0	0	16.7755	1	1	65	32.9
DATA	2000	24	45	0	0	A_44_P384698	XM_216321	7869.56	358.319	2.530200e+003	2.530381e+002	2516	36	9.922921e+000	0	0	0	0	0	0	2459.05	1	1	46.8651	36.5333
DATA	2001	24	46	0	0	A_42_P696084	NM_031022	7894.89	358.648	3.366953e+003	3.367090e+002	3263	34	2.031308e+001	0	0	0	0	0	0	3261.07	1	1	47.8731	41.3939
DATA	2002	24	47	0	0	A_64_P014918	NM_001108246	7920.58	358.573	1.148193e+003	1.148596e+002	1154.5	35	1.121367e+001	0	0	0	0	0	0	1108	1	1	57.5363	38.1481
DATA	2003	24	48	0	0	A_64_P032690	ENSRNOT00000049975	7946	358.545	9.468312e+004	9.468313e+003	91433	32	1.064432e+001	0	0	0	0	0	0	91028.4	1	1	55.8519	35.1111
DATA	2004	24	49	0	0	A_42_P481516	NM_134364	7971.42	358.573	4.003311e+003	4.003429e+002	3732	32	9.613978e+000	0	0	0	0	0	0	3834.08	1	1	57.5363	33.1667
DATA	2005	24	50	0	0	A_64_P166158	ENSRNOT00000013694	7996.58	358.573	2.013259e+002	2.036632e+001	254	38	8.810411e+000	0	0	0	0	0	0	192.066	1	1	65	37.04
DATA	2006	24	51	0	0	A_64_P140338	A_64_P140338	8022.42	358.573	4.310020e+000	3.119187e+000	66	35	1.133360e+001	0	0	0	0	0	0	4.09501	1	0	65	33.2174
DATA	2007	24	52	0	1	ERCC-00062_278	ERCC-00062_278	8047.79	359.159	2.462484e+002	2.481940e+001	294	31	1.026026e+001	0	0	0	0	0	0	233.033	1	1	45.1352	31.6111
DATA	2008	24	53	0	0	A_64_P110838	NM_001013175	8073	358.545	2.703734e+002	2.721618e+001	312	30.5	9.574931e+000	0	0	0	0	0	0	254.769	1	1	55.8519	30.1
DATA	2009	24	54	0	0	A_42_P802358	NM_001024341	8098.07	358.732	1.650455e+004	1.650458e+003	15110.5	32	7.816305e+000	0	0	0	1	0	0	15487.2	1	1	47.5395	31.8065
DATA	2010	24	55	0	0	A_64_P010421	A_64_P010421	8123.67	359.027	4.827991e+001	5.760065e+000	105	31	6.358524e+000	0	0	0	0	0	0	45.109	1	1	48.8603	31.3913
DATA	2011	24	56	0	0	A_43_P13320	NM_138880	8148.64	359	1.026660e+001	3.317961e+000	72	33	8.071440e+000	0	0	0	0	0	0	9.55081	1	0	45.4864	32.9259
DATA	2012	24	57	0	0	A_42_P800916	NM_022403	8174.5	359	6.008424e+001	6.793156e+000	117.5	31.5	8.234314e+000	0	0	0	0	0	0	55.6415	1	1	54.1152	32.1176
DATA	2013	24	58	0	0	A_42_P554610	XM_001064863	8199.8	359	1.693274e+004	1.693277e+003	14776	29.5	5.551809e+000	0	0	0	0	0	0	15610.2	1	1	49.1849	29.125
DATA	2014	24	59	0	0	A_42_P476353	NM_001012113	8225.24	359	1.290634e+004	1.290638e+003	11472	30	7.137582e+000	0	0	0	0	0	0	11843.9	1	1	46.8651	31.1515
DATA	2015	24	60	0	0	A_43_P12234	NM_022516	8250.72	358.905	2.815574e+003	2.815758e+002	2635.5	32	1.029100e+001	0	0	0	0	0	0	2571.79	1	1	48.8603	32.8571
DATA	2016	24	61	0	0	A_64_P048315	ENSRNOT00000044039	8276	358.797	2.941279e+002	2.958943e+001	334	30	1.040366e+001	0	0	0	0	0	0	267.411	1	1	46.8651	32.359
DATA	2017	24	62	0	0	A_44_P477047	NM_171983	8301.5	359	8.313675e+004	8.313676e+003	73912	32	7.735647e+000	0	0	0	0	0	0	75233	1	1	54.1152	31.5667
DATA	2018	24	63	0	0	A_43_P11871	NM_017230	8327	359	1.157854e+002	1.202843e+001	168	31	6.843082e+000	0	0	0	0	0	0	104.282	1	1	54.9904	30.5278
DATA	2019	24	64	0	0	A_64_P060608	XM_001068783	8352.18	358.633	3.701212e+001	4.941860e+000	101	30	6.353054e+000	0	0	0	0	0	0	33.1754	1	1	42.9674	29.8065
DATA	2020	24	65	0	0	A_64_P115811	NM_001008516	8377.5	359	3.904138e+001	5.105478e+000	98	32	8.100420e+000	0	0	0	0	0	0	34.8313	1	1	54.1152	33.0286
DATA	2021	24	66	0	0	A_44_P131296	ENSRNOT00000039892	8403	359	3.423623e+001	4.759123e+000	93	37	7.781379e+000	0	0	0	0	0	0	30.398	1	1	54.9904	37.3704
DATA	2022	24	67	0	0	A_44_P668388	NM_001109245	8428.5	359	3.942766e+002	3.956733e+001	408	37.5	1.690772e+001	0	0	0	0	0	0	348.394	1	1	54.1152	44.25
DATA	2023	24	68	0	0	A_64_P069729	NM_019189	8454	359	7.544141e+001	8.249515e+000	126	30	8.327285e+000	0	0	0	0	0	0	66.3421	1	1	54.9904	31.3667
DATA	2024	24	69	1028	1	(+)E1A_r60_1	E1A_r60_1	8479.35	358.907	3.365984e+000	3.367403e+000	65	30	7.585800e+000	0	0	0	0	0	0	2.64612	0	0	49.1849	31.0625
DATA	2025	24	70	0	0	A_64_P165441	NM_001109059	8504.46	358.986	4.445648e+001	5.578372e+000	101	30	6.858948e+000	0	0	0	0	0	0	38.7242	1	1	47.8731	29.3871
DATA	2026	24	71	0	0	A_44_P1034910	NM_201562	8530.09	358.896	3.580357e+003	3.580517e+002	3174	27.5	6.833402e+000	0	0	0	0	0	0	3103.65	1	1	46.8651	29.8462
DATA	2027	24	72	0	0	A_42_P631818	NM_030854	8555.44	358.875	2.742918e+001	4.370102e+000	84	30	7.932407e+000	0	0	0	0	0	0	23.6645	1	1	44.4243	29.3333
DATA	2028	24	73	0	0	A_64_P095620	ENSRNOT00000031258	8580.69	359	5.909235e+001	6.826554e+000	112	31	8.615996e+000	0	0	0	0	0	0	50.7445	1	1	47.2035	30.6538
DATA	2029	24	74	0	0	A_42_P726573	NM_053838	8606.31	358.986	1.635137e+003	1.635497e+002	1428	33	7.166574e+000	0	0	0	0	0	0	1397.5	1	1	47.2035	33.2143
DATA	2030	24	75	0	0	A_64_P029142	NM_001107866	8631.32	358.941	7.191587e+001	7.976348e+000	123	28	9.664161e+000	0	0	0	0	0	0	61.1819	1	1	45.835	29.6296
DATA	2031	24	76	0	0	A_43_P22902	NM_001106874	8657.4	359.077	3.929908e+000	3.488595e+000	66	28.5	6.018050e+000	0	0	0	0	0	0	3.32763	1	0	45.1352	28.0714
DATA	2032	24	77	0	0	A_42_P619008	NM_001013079	8682.24	359	7.047271e+003	7.047357e+002	5798	30	8.112552e+000	0	0	0	0	0	0	5940.48	1	1	46.8651	29.0357
DATA	2033	24	78	0	0	A_64_P054421	A_64_P054421	8707.61	359.069	9.845245e+000	3.633634e+000	70	25	1.289957e+001	0	0	0	0	0	0	8.26176	1	0	53.8203	30.5517
DATA	2034	24	79	0	0	A_42_P627330	NM_001106628	8732.94	358.825	8.118327e+002	8.125926e+001	726	27	9.646995e+000	0	0	0	0	0	0	678.186	1	1	45.4864	29.2581
DATA	2035	24	80	0	0	A_64_P049613	A_64_P049613	8758.43	359.134	2.735394e+001	4.464873e+000	82.5	33	1.029673e+001	0	0	0	0	0	0	22.7519	1	1	46.1809	33.0909
DATA	2036	24	81	0	0	A_42_P708614	NM_001130505	8784	359.455	6.104431e+004	6.104432e+003	49736.5	33	8.537678e+000	0	0	0	0	0	0	50557.6	1	1	55.8519	32.0667
DATA	2037	24	82	0	0	A_42_P660068	NM_031350	8809.27	359.38	2.996657e+003	2.996868e+002	2497	27	6.467909e+000	0	0	0	0	0	0	2471.32	1	1	50.7771	26.9231
DATA	2038	24	83	66	1	DarkCorner	DarkCorner	8834.49	358.966	3.587318e+000	3.574336e+000	53.5	30	8.281992e+000	0	0	0	0	0	0	-7.24312	0	0	51.0895	31.5161
DATA	2039	24	84	66	1	DarkCorner	DarkCorner	8860.47	359.278	3.602066e+000	3.589457e+000	62	28	7.475961e+000	0	0	0	0	0	0	0.452626	0	0	48.2044	30.84
DATA	2040	24	85	66	1	DarkCorner	DarkCorner	8885.74	359.203	3.746064e+000	3.622866e+000	63	26	7.222417e+000	0	0	0	0	0	0	3.05132	1	0	48.5334	26.5136
DATA	2041	25	1	66	1	DarkCorner	DarkCorner	6739.58	365.427	3.790119e+000	3.153853e+000	67	27	6.932643e+000	0	0	0	0	0	0	3.55305	1	0	57.5363	26.8753
DATA	2042	25	2	66	1	DarkCorner	DarkCorner	6765.42	365.427	3.121472e+000	3.110175e+000	59.5	30	6.909041e+000	0	0	0	0	0	0	-3.886	0	0	57.5363	29.1212
DATA	2043	25	3	0	0	A_64_P106975	A_64_P106975	6790.54	365.614	2.280561e+002	2.301412e+001	282.5	28	9.155678e+000	0	0	0	0	0	0	216.562	1	1	47.5395	29.6333
DATA	2044	25	4	0	0	A_42_P799702	NM_145093	6816	365.455	4.836400e+002	4.846152e+001	522	30	9.300538e+000	0	0	0	1	0	0	461.973	1	1	55.8519	32
DATA	2045	25	5	0	0	A_42_P704429	NM_053428	6841.42	365.427	3.945576e+004	3.945577e+003	37015.5	33	8.286013e+000	0	0	0	0	0	0	37899	1	1	57.5363	32.9091
DATA	2046	25	6	0	0	A_64_P129730	NM_001033896	6866.58	365.427	1.753263e+002	1.779421e+001	231	31	8.724942e+000	0	0	0	0	0	0	169.29	1	1	57.5363	32.2692
DATA	2047	25	7	0	0	A_64_P156308	NM_001008284	6891.97	365.329	1.218030e+003	1.218405e+002	1214	31	7.657809e+000	0	0	0	0	0	0	1181.91	1	1	48.8603	30.7273
DATA	2048	25	8	0	0	A_44_P152029	A_44_P152029	6917.58	365.427	1.821690e+001	3.518887e+000	81	29.5	9.028572e+000	0	0	0	0	0	0	17.7601	1	1	57.5363	31.0313
DATA	2049	25	9	0	0	A_42_P751152	NM_001106360	6943	365.455	6.504380e+004	6.504381e+003	62530	31	7.150999e+000	0	0	0	0	0	0	63689.4	1	1	55.8519	32.0333
DATA	2050	25	10	0	0	A_64_P010494	NM_001001421	6968.11	365.528	1.995220e+002	2.017433e+001	261	31	8.948506e+000	0	0	0	0	0	0	196.154	1	1	47.8731	31.5
DATA	2051	25	11	0	0	A_64_P054606	NM_001107279	6993.5	365.735	4.462151e+002	4.472052e+001	507	30	7.174724e+000	0	0	0	0	0	0	440.353	1	1	46.5243	30.68
DATA	2052	25	12	0	0	A_44_P335679	NM_001108168	7019.33	365.5	4.870117e+001	5.701123e+000	110	28.5	6.313069e+000	0	0	0	0	0	0	48.2286	1	1	65	29.375
DATA	2053	25	13	0	0	A_64_P128766	NM_001034912	7044.55	365.512	1.689127e+002	1.714773e+001	229.5	37	9.514422e+000	0	0	0	0	0	0	167.803	1	1	50.4627	36.2963
DATA	2054	25	14	0	0	A_42_P595591	NM_031011	7069.86	365.5	2.239741e+004	2.239743e+003	21952	30	9.281152e+000	0	0	0	0	0	0	22314.7	1	1	52.3208	32.8387
DATA	2055	25	15	0	0	A_44_P962846	ENSRNOT00000058887	7095.38	365.514	3.105148e+002	3.119019e+001	365	33	9.317193e+000	0	0	0	0	0	0	310.188	1	1	48.2044	33.8857
DATA	2056	25	16	0	0	A_64_P111878	XR_005569	7120.5	365.5	2.344497e+003	2.344680e+002	2536	30	1.273580e+001	0	0	0	0	0	0	2347.5	1	1	43.7019	33.8438
DATA	2057	25	17	0	0	A_64_P149225	NM_001100833	7146.33	365.5	1.258184e+005	1.258184e+004	126881	35	7.182706e+000	0	0	0	0	0	0	126248	1	1	57.5363	34.9643
DATA	2058	25	18	0	0	A_64_P032361	ENSRNOT00000061428	7171.2	365.831	1.326249e+003	1.326570e+002	1349	32.5	9.056568e+000	0	0	0	0	0	0	1333.26	1	1	47.5395	33.0833
DATA	2059	25	19	0	0	A_64_P038843	A_64_P038843	7196.89	365.5	1.953056e+001	3.508989e+000	82	32	7.511420e+000	0	0	0	0	0	0	19.664	1	1	65	33.0833
DATA	2060	25	20	1028	1	(+)E1A_r60_a97	E1A_r60_a97	7222.42	365.573	2.921867e+000	2.911293e+000	61.5	32	7.794000e+000	0	0	0	0	0	0	-2.05505	0	0	65	31.1481
DATA	2061	25	21	0	0	A_42_P586883	NM_001106416	7247.48	365.507	6.916088e+001	7.502664e+000	132.5	34	1.218264e+001	0	0	0	0	0	0	69.8016	1	1	49.1849	36.8
DATA	2062	25	22	0	0	A_42_P626023	NM_001107265	7273.11	365.5	9.090739e+002	9.095382e+001	970.5	31	7.785634e+000	0	0	0	0	0	0	918.279	1	1	56.9804	32.0667
DATA	2063	25	23	0	0	A_64_P304646	ENSRNOT00000046873	7298.5	365.5	6.045096e+001	6.706426e+000	122	32	1.116572e+001	0	0	0	0	0	0	61.1003	1	1	57.5363	34.8125
DATA	2064	25	24	0	0	A_42_P540711	NM_133568	7323.79	365.699	2.002145e+004	2.002147e+003	20181	33.5	1.095560e+001	0	0	0	0	0	0	20245	1	1	48.2044	35.6071
DATA	2065	25	25	0	0	A_64_P079149	XM_001063529	7349.42	365.573	1.447442e+002	1.476254e+001	208	30	7.665967e+000	0	0	0	0	0	0	146.379	1	1	57.5363	31.2727
DATA	2066	25	26	0	0	A_42_P507072	FQ213070	7374.44	365.973	5.282170e+003	5.282250e+002	5328	31	6.312813e+000	0	0	0	0	0	0	5341.9	1	1	48.5334	30.5806
DATA	2067	25	27	0	0	A_44_P314270	ENSRNOT00000015469	7399.63	366	2.234167e+002	2.252950e+001	290	30	6.767191e+000	0	0	0	0	0	0	225.881	1	1	48.5334	31.4444
DATA	2068	25	28	0	0	A_64_P026098	ENSRNOT00000027092	7425.27	366.333	1.249175e+002	1.282495e+001	187	32	9.092374e+000	0	0	0	0	0	0	126.241	1	1	45.835	32.8667
DATA	2069	25	29	0	0	A_64_P018599	XM_229548	7450.58	365.573	2.917374e+000	2.906816e+000	59	29	6.322418e+000	0	0	0	0	0	0	-2.17121	0	0	57.5363	30.1622
DATA	2070	25	30	0	0	A_43_P15907	NM_001134567	7476.42	365.573	5.512874e+001	6.233526e+000	115	29	6.872498e+000	0	0	0	0	0	0	55.6152	1	1	57.5363	30.8649
DATA	2071	25	31	0	0	A_64_P151804	A_64_P151804	7501.31	365.625	9.076961e+001	9.532803e+000	153	31	9.560871e+000	0	0	0	0	0	0	91.4731	1	1	44.7812	31.4444
DATA	2072	25	32	0	0	A_42_P642743	NM_017005	7526.61	365.722	1.838243e+004	1.838245e+003	18166	32	7.062877e+000	0	0	0	0	0	0	18501.5	1	1	48.5334	30.7931
DATA	2073	25	33	0	0	A_42_P630463	NM_022238	7552.19	366.094	4.360350e+002	4.370119e+001	506.5	31	8.967161e+000	0	0	0	0	0	0	438.241	1	1	45.835	29.8824
DATA	2074	25	34	0	0	A_64_P119533	NM_001000351	7577.58	365.573	2.747159e+001	4.013153e+000	92	32	8.489075e+000	0	0	0	0	0	0	27.5623	1	1	57.5363	31.2424
DATA	2075	25	35	0	0	A_64_P158068	FQ219182	7602.61	366.278	5.038700e+003	5.038786e+002	4942	30	9.939058e+000	0	0	0	0	0	0	5046.89	1	1	47.8731	30.2571
DATA	2076	25	36	0	0	A_64_P000779	XM_225838	7628.58	365.573	3.441431e+001	4.524167e+000	95	32	8.319124e+000	0	0	0	0	0	0	34.3953	1	1	57.5363	31.9487
DATA	2077	25	37	0	0	A_44_P630082	ENSRNOT00000020640	7653.91	365.896	2.420751e+002	2.438575e+001	302	33	1.248188e+001	0	0	0	0	0	0	241.433	1	1	46.8651	35.2121
DATA	2078	25	38	0	0	A_42_P717654	XM_001063683	7679.03	365.939	4.919935e+003	4.920023e+002	4754	33	1.110726e+001	0	0	0	0	0	0	4895.64	1	1	46.8651	35.3939
DATA	2079	25	39	0	0	A_42_P792382	NM_017257	7704.57	366.239	9.773394e+003	9.773439e+002	9649	37	9.112912e+000	0	0	0	0	0	0	9701.41	1	1	46.5243	34.6129
DATA	2080	25	40	0	0	A_64_P075035	NM_001001014	7730.39	365.931	2.135034e+002	2.155524e+001	281	36	1.081784e+001	0	0	0	0	0	0	211.351	1	1	53.8203	36.4444
DATA	2081	25	41	0	0	A_64_P021281	NM_001039022	7755.43	366.1	8.011977e+003	8.012032e+002	7904	31.5	7.804565e+000	0	0	0	0	0	0	7909.73	1	1	47.5395	33.2917
DATA	2082	25	42	0	0	A_44_P729533	TC581820	7780.84	366.103	9.877304e+003	9.877349e+002	9733.5	34	6.344605e+000	0	0	0	0	0	0	9722.78	1	1	46.5243	34.5588
DATA	2083	25	43	0	0	A_42_P802358	NM_001024341	7805.84	366.103	1.723431e+004	1.723434e+003	16852	30	6.264097e+000	0	0	0	0	0	0	16913.7	1	1	46.5243	31.8966
DATA	2084	25	44	0	0	A_42_P481087	XM_232226	7831.48	366.104	1.642355e+003	1.642629e+002	1666	30	8.785510e+000	0	0	0	0	0	0	1606.62	1	1	49.5074	32
DATA	2085	25	45	0	0	A_42_P561597	NM_001106486	7856.84	365.897	1.138379e+004	1.138383e+003	10977.5	33.5	8.946135e+000	0	0	0	0	0	0	11098.9	1	1	46.5243	34.9667
DATA	2086	25	46	0	0	A_64_P113381	A_64_P113381	7882.5	366	1.519358e+001	3.381476e+000	77.5	31	1.057664e+001	0	0	0	0	0	0	14.7622	1	1	65	32.7941
DATA	2087	25	47	0	0	A_64_P088695	NM_001134414	7908	366	1.483187e+003	1.483497e+002	1405.5	33	1.370548e+001	0	0	0	0	0	0	1435.95	1	1	54.9904	36.7667
DATA	2088	25	48	0	0	A_44_P728586	ENSRNOT00000013367	7933	366	9.326041e+002	9.331003e+001	959	33	7.274695e+000	0	0	0	0	0	0	899.651	1	1	46.8651	34.7241
DATA	2089	25	49	0	0	A_42_P544898	NM_001108279	7958.5	366	3.795388e+001	4.871659e+000	97	29	7.687819e+000	0	0	0	0	0	0	36.4746	1	1	54.1152	31.2222
DATA	2090	25	50	0	0	A_44_P432910	NM_012814	7984.09	365.935	1.480180e+005	1.480180e+004	141784	37	8.824853e+000	0	0	0	0	0	0	141694	1	1	54.4085	36.8438
DATA	2091	25	51	0	0	A_64_P157820	XM_001079095	8009.44	366.232	1.124335e+002	1.165709e+001	172	35.5	1.106325e+001	0	0	0	0	0	0	107.211	1	1	46.8651	34.6071
DATA	2092	25	52	0	0	A_42_P601802	NM_134465	8034.73	366.219	3.802087e+003	3.802213e+002	3641	29	8.510296e+000	0	0	0	0	0	0	3610.88	1	1	48.2044	30.6176
DATA	2093	25	53	0	0	A_64_P039737	NM_001130508	8060.23	366.087	7.674687e+002	7.680959e+001	773	31	1.153251e+001	0	0	0	0	0	0	725.83	1	1	46.5243	30.9667
DATA	2094	25	54	0	0	A_42_P648800	AA998304	8085.5	366	1.786995e+002	1.813969e+001	226	34.5	8.018745e+000	0	0	0	0	0	0	168.294	1	1	54.1152	34.3214
DATA	2095	25	55	0	0	A_64_P007009	ENSRNOT00000014567	8110.94	366.111	2.861343e+003	2.861514e+002	2754	32.5	8.017837e+000	0	0	0	0	0	0	2683.23	1	1	45.4864	32.7143
DATA	2096	25	56	0	0	A_64_P049527	TC606896	8136.43	366.097	2.267532e+002	2.289220e+001	273	34	5.337860e+000	0	0	0	0	0	0	211.709	1	1	48.2044	33.6667
DATA	2097	25	57	0	0	A_44_P281595	NM_001037556	8161.61	366.069	7.418379e+001	8.062411e+000	132	29	7.571878e+000	0	0	0	0	0	0	68.9587	1	1	53.8203	32.1111
DATA	2098	25	58	0	0	A_44_P374638	NM_024391	8187.5	366	5.261432e+001	6.143665e+000	113	32	7.713559e+000	0	0	0	0	0	0	48.6848	1	1	65	33.2813
DATA	2100	25	60	0	0	A_64_P046416	A_64_P046416	8238.09	366.065	9.653437e+001	1.017030e+001	149.5	34	5.780367e+000	0	0	0	0	0	0	88.5183	1	1	54.4085	33.9667
DATA	2101	25	61	0	0	A_44_P428560	NM_001001358	8263.13	366.029	5.927816e+001	6.743821e+000	119	30	7.905455e+000	0	0	0	0	0	0	54.1081	1	1	46.8651	30.6061
DATA	2102	25	62	0	0	A_44_P208887	NM_001105774	8288.61	366.069	8.053533e+001	8.677356e+000	139	29.5	6.356578e+000	0	0	0	0	0	0	73.169	1	1	53.8203	29.5357
DATA	2103	25	63	0	0	A_42_P533792	NM_001106575	8313.77	366.116	1.394852e+004	1.394856e+003	12189	33	7.685583e+000	0	0	0	0	0	0	12614	1	1	46.5243	32.4545
DATA	2104	25	64	0	0	A_42_P802550	NM_017365	8339.02	366.156	4.767195e+002	4.778335e+001	495	29	6.250161e+000	0	0	0	0	0	0	429.096	1	1	45.4864	29.2581
DATA	2105	25	65	0	0	A_42_P545129	ENSRNOT00000007554	8364.62	366.405	8.569506e+002	8.575767e+001	820.5	30	6.862415e+000	0	0	0	0	0	0	767.708	1	1	48.8603	30.0625
DATA	2106	25	66	0	0	A_42_P500675	NM_013179	8390.54	366.389	4.943385e+002	4.954336e+001	500.5	32.5	7.979720e+000	0	0	0	0	0	0	440.711	1	1	48.2044	32.75
DATA	2107	25	67	0	0	A_44_P127238	NM_001127655	8415.7	366.29	1.011777e+003	1.012318e+002	959	41	1.317607e+001	0	0	0	0	0	0	897.746	1	1	46.8651	43.5625
DATA	2108	25	68	0	0	A_64_P042142	ENSRNOT00000027371	8440.83	366.542	1.340539e+002	1.381121e+001	181	33.5	9.569304e+000	0	0	0	0	0	0	118.392	1	1	47.8731	33.0938
DATA	2109	25	69	0	0	A_44_P279756	NM_022848	8466.58	366.427	3.351784e+000	3.349805e+000	61	30.5	1.153885e+001	0	0	0	0	0	0	2.29029	0	0	57.5363	33.875
DATA	2110	25	70	0	0	A_64_P119597	NM_001106871	8492	366.455	3.959963e+000	3.378889e+000	67	33.5	6.777668e+000	0	0	0	0	0	0	3.46378	1	0	55.8519	32.1667
DATA	2111	25	71	0	0	A_44_P790674	NM_001191933	8517.42	366.427	4.958163e+001	5.995944e+000	105.5	30.5	6.837010e+000	0	0	0	0	0	0	43.1628	1	1	57.5363	31.3214
DATA	2112	25	72	0	0	A_44_P405618	ENSRNOT00000025426	8542.44	366.174	3.161253e+002	3.179353e+001	340.5	31.5	7.674067e+000	0	0	0	0	0	0	273.901	1	1	47.2035	30.75
DATA	2113	25	73	0	0	A_42_P719478	NM_001191779	8568.42	366.427	2.124954e+001	4.012653e+000	78	24	6.853953e+000	0	0	0	0	0	0	18.3237	1	1	57.5363	26.32
DATA	2114	25	74	0	0	A_64_P061424	A_64_P061424	8593.58	366.427	2.155981e+001	4.042578e+000	81	29.5	6.626483e+000	0	0	0	0	0	0	18.5051	1	1	57.5363	29.6563
DATA	2115	25	75	0	0	A_44_P1042876	NM_212504	8619	366.455	1.704870e+003	1.705216e+002	1432.5	32	9.913291e+000	0	0	0	0	0	0	1456.52	1	1	55.8519	33.24
DATA	2116	25	76	0	0	A_44_P470043	NM_001108103	8644.42	366.427	1.545522e+002	1.583595e+001	190.5	28	7.027524e+000	0	0	0	0	0	0	131.428	1	1	57.5363	28.0313
DATA	2117	25	77	0	0	A_64_P108484	ENSRNOT00000046584	8669.58	366.427	4.690772e+001	5.833125e+000	100.5	31	6.888152e+000	0	0	0	0	0	0	39.7088	1	1	57.5363	30.913
DATA	2118	25	78	0	0	A_42_P666065	NM_001014069	8695.08	366.493	5.396693e+002	5.407921e+001	504.5	30	8.931182e+000	0	0	0	0	0	0	454.782	1	1	45.835	29.8621
DATA	2119	25	79	0	0	A_64_P136571	NM_001134545	8720.63	366.703	8.299515e+001	9.006755e+000	132	24	6.833976e+000	0	0	0	0	0	0	69.6303	1	1	44.7812	25.6452
DATA	2120	25	80	0	0	A_42_P816740	NM_001108705	8745.97	366.625	5.365142e+002	5.376638e+001	510	28	7.336489e+000	0	0	0	0	0	0	448.131	1	1	45.1352	28.75
DATA	2121	25	81	0	0	A_64_P018142	NM_001100716	8771.42	366.427	2.075394e+002	2.105194e+001	236	31.5	9.571199e+000	0	0	0	0	0	0	172.587	1	1	65	31.2941
DATA	2122	25	82	0	0	A_42_P779687	ENSRNOT00000034449	8796.57	366.608	9.272249e+003	9.272317e+002	7381	32.5	5.253073e+000	0	0	0	0	0	0	7678.47	1	1	49.1849	31.2222
DATA	2124	25	84	66	1	DarkCorner	DarkCorner	8847.5	366.5	3.587171e+000	3.574189e+000	56	29	6.212024e+000	0	0	0	0	0	0	-6.52919	0	0	57.5363	29.4516
DATA	2125	25	85	66	1	DarkCorner	DarkCorner	8872.81	366.753	3.601350e+000	3.588317e+000	57	30.5	8.568743e+000	0	0	0	0	0	0	-4.79809	0	0	48.2044	31.0294
DATA	2126	26	1	66	1	DarkCorner	DarkCorner	6752.4	372.543	3.126202e+000	3.114888e+000	63.5	28	7.231734e+000	0	0	0	0	0	0	-1.74041	0	0	51.0895	27.5556
DATA	2127	26	2	66	1	DarkCorner	DarkCorner	6778.03	373.082	3.105781e+000	3.094541e+000	60	30	8.540371e+000	0	0	0	0	0	0	-3.69407	0	0	44.4243	30.6
DATA	2128	26	3	0	0	A_42_P713844	NM_001106167	6803.03	373.116	1.294363e+003	1.294728e+002	1265.5	31	9.775033e+000	0	0	0	0	0	0	1235.01	1	1	46.8651	31.9143
DATA	2129	26	4	0	0	A_42_P627219	NM_001012468	6828.64	373.134	1.392165e+004	1.392169e+003	13351	33.5	6.505293e+000	0	0	0	0	0	0	13360.1	1	1	45.835	34.3333
DATA	2130	26	5	0	0	A_42_P461003	NM_001044283	6854.01	372.578	1.587521e+004	1.587524e+003	15195.5	33.5	9.683293e+000	0	0	0	0	0	0	15315.1	1	1	51.0895	34.6154
DATA	2131	26	6	0	0	A_44_P1019923	NM_022522	6879.46	372.882	3.379019e+003	3.379155e+002	3224	31	5.028768e+000	0	0	0	0	0	0	3276.68	1	1	49.8279	31.2333
DATA	2132	26	7	0	0	A_42_P814056	NM_001108866	6904.71	372.774	1.219627e+004	1.219631e+003	11618.5	29	8.732026e+000	0	0	0	0	0	0	11882.9	1	1	51.4001	30.4
DATA	2133	26	8	0	0	A_42_P795269	NM_001134730	6930.13	373.143	1.050260e+004	1.050265e+003	10289	29	7.356844e+000	0	0	0	0	0	0	10279.4	1	1	45.4864	30.1379
DATA	2134	26	9	0	0	A_42_P763522	NM_001013980	6955.44	373.027	5.074551e+003	5.074639e+002	4889	30.5	9.623329e+000	0	0	0	0	0	0	4987.28	1	1	48.5334	32.6429
DATA	2135	26	10	0	0	A_44_P292437	NM_153309	6980.8	373	2.466361e+002	2.484239e+001	300	31	6.980412e+000	0	0	0	0	0	0	243.334	1	1	49.1849	30.3846
DATA	2136	26	11	0	0	A_64_P065313	ENSRNOT00000042070	7006.44	373.027	1.195176e+002	1.231386e+001	179.5	30	6.888271e+000	0	0	0	0	0	0	118.346	1	1	48.5334	30.6552
DATA	2137	26	12	0	0	A_64_P008047	NM_001033670	7031.61	372.931	3.599559e+004	3.599560e+003	35028	33.5	8.868127e+000	0	0	0	0	0	0	35758.8	1	1	53.8203	33.3333
DATA	2138	26	13	0	0	A_64_P080612	TC638889	7057.29	372.754	6.372352e+003	6.372420e+002	6345.5	32	8.768085e+000	0	0	0	0	0	0	6349.57	1	1	45.1352	33.5
DATA	2139	26	14	0	0	A_43_P17696	NM_001004257	7082.38	373	3.596662e+003	3.596782e+002	3551	31.5	8.908078e+000	0	0	0	0	0	0	3593.72	1	1	48.5334	31.9231
DATA	2140	26	15	0	0	A_64_P019608	NM_001105713	7107.79	372.806	6.629431e+002	6.635905e+001	723	30	6.630464e+000	0	0	0	0	0	0	664.02	1	1	47.5395	30.9655
DATA	2141	26	16	0	0	A_64_P108575	ENSRNOT00000046600	7133.5	373	6.901287e+001	7.495061e+000	135	30	9.343754e+000	0	0	0	0	0	0	69.2826	1	1	54.1152	31.7333
DATA	2142	26	17	0	0	A_64_P136859	NM_001109642	7158.4	372.947	7.379473e+003	7.379530e+002	7220.5	33	7.731056e+000	0	0	0	0	0	0	7422.42	1	1	49.1849	33.6667
DATA	2143	26	18	0	0	A_64_P021597	A_64_P021597	7184.07	373.176	9.029525e+000	3.049775e+000	71	32	7.467428e+000	0	0	0	0	0	0	9.09806	1	0	47.5395	31.9744
DATA	2144	26	19	0	0	A_64_P148032	A_64_P148032	7209.77	372.959	2.744517e+002	2.759889e+001	340.5	32	6.969903e+000	0	0	0	0	0	0	276.927	1	1	48.2044	32.2727
DATA	2145	26	20	0	0	A_42_P743580	NM_017214	7234.79	373.093	1.518048e+004	1.518050e+003	15279	28	6.089257e+000	0	0	0	0	0	0	15335.8	1	1	48.2044	27.5217
DATA	2146	26	21	0	0	A_42_P693964	NM_181087	7260.31	373.014	3.581883e+003	3.582001e+002	3506	31	8.824500e+000	0	0	0	0	0	0	3621.96	1	1	47.2035	33.4444
DATA	2147	26	22	0	0	A_44_P1058389	NM_012992	7285.56	372.973	1.952725e+004	1.952727e+003	18834	30	4.948737e+000	0	0	0	0	0	0	19759.7	1	1	48.5334	30.64
DATA	2148	26	23	0	0	A_44_P135224	NM_022187	7311.5	373	1.483829e+002	1.511887e+001	212.5	29	7.957992e+000	0	0	0	0	0	0	150.224	1	1	54.1152	29.3438
DATA	2149	26	24	0	0	A_64_P070249	ENSRNOT00000048236	7336.37	372.986	7.663399e+002	7.668879e+001	821	29	7.234178e+000	0	0	0	0	0	0	776.043	1	1	47.2035	29.4444
DATA	2150	26	25	0	0	A_42_P806899	NM_001108829	7362	373	2.448840e+001	3.794361e+000	87	33	1.022973e+001	0	0	0	0	0	0	24.7994	1	1	54.9904	34.2258
DATA	2151	26	26	0	0	A_42_P465144	NM_001107714	7387.53	372.986	6.967050e+001	7.546076e+000	133.5	30	5.990971e+000	0	0	0	0	0	0	70.5423	1	1	48.5334	29.7407
DATA	2152	26	27	0	0	A_43_P19712	NM_001106751	7412.73	372.836	1.373450e+001	3.208878e+000	77	33	1.056724e+001	0	0	0	0	0	0	13.9005	1	0	48.2044	35.2
DATA	2153	26	28	0	0	A_42_P728472	NM_001007600	7437.79	373.194	9.221331e+003	9.221377e+002	9047	28.5	6.740510e+000	0	0	0	0	0	0	9327.9	1	1	47.5395	29.7188
DATA	2154	26	29	66	-1	(-)3xSLv1	NegativeControl	7463.56	373.5	2.914367e+000	2.903820e+000	57.5	29.5	6.500684e+000	0	0	0	0	0	0	-5.48691	0	0	46.5243	30.8947
DATA	2155	26	30	0	0	A_42_P629394	NM_031683	7488.78	372.952	3.936224e+003	3.936331e+002	3891.5	33.5	8.732579e+000	0	0	0	0	0	0	3974.34	1	1	49.5074	32.0357
DATA	2156	26	31	0	0	A_64_P041977	A_64_P041977	7514.45	373.07	5.638204e+001	6.345083e+000	119	31	5.344474e+000	0	0	0	0	0	0	56.8605	1	1	48.2044	30.0417
DATA	2157	26	32	0	0	A_44_P126406	XM_228958	7539.65	372.862	1.000741e+004	1.000746e+003	10069	32	8.292230e+000	0	0	0	0	0	0	10078.1	1	1	45.4864	31.2414
DATA	2158	26	33	0	0	A_64_P021878	NM_001167664	7565.09	373.386	6.386887e+001	7.022252e+000	129	30.5	7.714550e+000	0	0	0	0	0	0	64.2255	1	1	57.259	29.1667
DATA	2159	26	34	0	0	A_64_P058719	NM_001014175	7590.07	373.282	1.124151e+004	1.124155e+003	11081	31	8.135659e+000	0	0	0	0	0	0	11284.7	1	1	47.2035	30.4118
DATA	2160	26	35	0	0	A_42_P495579	NM_001107564	7615.27	373.425	3.901789e+002	3.912770e+001	462	31	9.818474e+000	0	0	0	0	0	0	390.946	1	1	48.5334	31.561
DATA	2161	26	36	0	0	A_64_P054979	NM_001109615	7641.46	373.5	8.910388e+001	9.381526e+000	151	31.5	7.396512e+000	0	0	0	0	0	0	89.0888	1	1	47.2035	31.3158
DATA	2162	26	37	0	0	A_44_P713838	ENSRNOT00000032874	7666.53	372.905	2.166121e+002	2.186015e+001	278	34	1.194899e+001	0	0	0	0	0	0	216.072	1	1	48.5334	36.7241
DATA	2163	26	38	0	0	A_64_P158913	NM_001108101	7692	373.455	1.306165e+001	3.225585e+000	74	35	8.962147e+000	0	0	0	0	0	0	12.999	1	0	55.8519	34.4848
DATA	2164	26	39	0	0	A_43_P13018	NM_054004	7717.11	373.043	2.105230e+004	2.105232e+003	20535.5	38	9.786734e+000	0	0	0	0	0	0	20896.9	1	1	46.8651	37.3611
DATA	2165	26	40	0	0	A_64_P114383	A_64_P114383	7742.72	372.971	2.404221e+004	2.404223e+003	23820.5	37	1.046007e+001	0	0	0	0	0	0	23799.4	1	1	46.1809	36.75
DATA	2166	26	41	0	0	A_43_P16629	XM_001080634	7767.79	373.26	9.484652e+003	9.484699e+002	9059	34	6.891094e+000	0	0	0	0	0	0	9363.01	1	1	48.5334	34.7778
DATA	2167	26	42	0	0	A_42_P810313	NM_001108677	7793.58	373.427	8.446902e+001	8.957888e+000	147	33.5	9.283848e+000	0	0	0	0	0	0	83.1359	1	1	57.5363	35.1471
DATA	2168	26	43	0	0	A_42_P537516	NM_001106023	7818.87	373.5	1.604524e+004	1.604527e+003	15853	29	1.649008e+001	0	0	0	0	0	0	15743.3	1	1	49.8279	34.4516
DATA	2169	26	44	0	0	A_64_P006964	A_64_P006964	7844.25	373.373	1.448897e+002	1.479655e+001	208	32	8.446998e+000	0	0	0	0	0	0	141.699	1	1	46.1809	33.5217
DATA	2170	26	45	0	0	A_42_P829251	NM_133381	7869.67	373.5	3.825121e+001	4.868211e+000	99	31.5	7.495590e+000	0	0	0	0	0	0	37.2839	1	1	57.5363	32.0357
DATA	2171	26	46	0	0	A_42_P687443	NM_020100	7895.42	373.427	2.188839e+002	2.209602e+001	272	33	9.684152e+000	0	0	0	0	0	0	212.593	1	1	57.5363	33.129
DATA	2172	26	47	0	0	A_44_P196146	NM_031349	7920.59	373.303	1.515744e+002	1.545789e+001	208	31	8.451676e+000	0	0	0	0	0	0	146.69	1	1	45.4864	33.3913
DATA	2173	26	48	0	0	A_64_P050137	ENSRNOT00000058586	7946	373.455	2.724279e+002	2.741233e+001	329	32	6.657218e+000	0	0	0	0	0	0	262.682	1	1	55.8519	32.4375
DATA	2174	26	49	0	0	A_44_P637827	NM_001108797	7970.94	373.494	5.279777e+003	5.279865e+002	5020.5	31	8.535968e+000	0	0	0	0	0	0	5071.94	1	1	49.5074	32.4706
DATA	2175	26	50	0	0	A_64_P070073	NM_001109590	7996.67	373.5	1.575093e+002	1.604685e+001	218	37.5	9.602689e+000	0	0	0	0	0	0	150.712	1	1	57.5363	36.7143
DATA	2176	26	51	0	0	A_64_P130572	NM_001109400	8021.61	373.271	1.458963e+003	1.459288e+002	1438.5	33	9.786209e+000	0	0	0	0	0	0	1390.47	1	1	47.5395	32.6452
DATA	2177	26	52	0	0	A_42_P658815	NM_198745	8047.26	373.42	1.533586e+003	1.533898e+002	1512	31	1.064450e+001	0	0	0	0	0	0	1455.62	1	1	46.8651	30.3448
DATA	2179	26	54	0	0	A_43_P14809	TC581403	8098.2	373.211	1.650098e+003	1.650393e+002	1600.5	35	6.611032e+000	0	0	0	0	0	0	1553	1	1	47.5395	34.8667
DATA	2180	26	55	0	0	A_42_P553319	TC597248	8123.33	373.045	1.270187e+002	1.308234e+001	183	31.5	6.587424e+000	0	0	0	0	0	0	119.031	1	1	45.4864	31.6563
DATA	2181	26	56	0	0	A_64_P004162	NM_019139	8149.33	373.5	6.142063e+000	3.205275e+000	69	31.5	7.630609e+000	0	0	0	0	0	0	5.73064	1	0	57.5363	32.8214
DATA	2182	26	57	0	0	A_64_P032450	NM_172330	8174.57	373.605	2.652988e+002	2.671738e+001	310	30	6.971313e+000	0	0	0	0	0	0	246.444	1	1	49.5074	32.5278
DATA	2183	26	58	0	0	A_44_P470976	NM_001013133	8199.84	373.716	4.450432e+001	5.466194e+000	106	29.5	6.324304e+000	0	0	0	0	0	0	41.158	1	1	45.835	30.0556
DATA	2184	26	59	0	0	A_64_P166428	NM_001037205	8225.42	373.573	1.618935e+002	1.650034e+001	213.5	32	6.385791e+000	0	0	0	0	0	0	149.033	1	1	57.5363	32.7241
DATA	2185	26	60	0	0	A_43_P11576	NM_012821	8250.58	373.573	1.508902e+001	3.540591e+000	76	33.5	9.590215e+000	0	0	0	0	0	0	13.8274	1	0	57.5363	33.25
DATA	2186	26	61	0	0	A_64_P156910	A_64_P156910	8276.33	373.5	2.297902e+002	2.320326e+001	273	29.5	6.789737e+000	0	0	0	0	0	0	209.587	1	1	57.5363	29.7857
DATA	2187	26	62	0	0	A_64_P126140	NM_001191648	8301.5	373.5	8.202982e+001	8.817090e+000	141	32	7.084804e+000	0	0	0	0	0	0	74.4731	1	1	57.5363	30.75
DATA	2188	26	63	0	0	A_42_P637122	NM_001108351	8326.74	373.708	3.914864e+003	3.914999e+002	3465	33	7.511112e+000	0	0	0	0	0	0	3537.86	1	1	47.8731	31.7714
DATA	2189	26	64	0	0	A_64_P081208	NM_001009712	8351.94	373.462	1.517408e+004	1.517411e+003	13335	30	6.181902e+000	0	0	0	0	0	0	13648	1	1	44.7812	29.8182
DATA	2190	26	65	0	0	A_42_P465608	NM_130894	8377.63	373.556	3.681830e+003	3.681976e+002	3323.5	32.5	7.608127e+000	0	0	0	0	0	0	3295.81	1	1	48.2044	32.5714
DATA	2191	26	66	0	0	A_42_P485589	NM_017246	8402.59	373.41	1.294436e+002	1.335699e+001	179.5	36	9.216628e+000	0	0	0	0	0	0	115.329	1	1	50.1463	35.7097
DATA	2192	26	67	0	0	A_64_P031383	NM_020308	8428.1	373.593	5.740937e+002	5.750471e+001	573	35	9.965467e+000	0	0	0	0	0	0	509.081	1	1	42.9674	35.8148
DATA	2193	26	68	0	0	A_44_P220647	NM_001107097	8453.61	373.642	7.720856e+001	8.406697e+000	130	28.5	8.853592e+000	0	0	0	0	0	0	68.1397	1	1	45.835	30.4688
DATA	2194	26	69	0	0	A_44_P294687	NM_080885	8479.26	373.42	3.842015e+002	3.856523e+001	398.5	28.5	7.666864e+000	0	0	0	1	0	0	337.432	1	1	46.8651	29.5417
DATA	2195	26	70	0	0	A_42_P512838	NM_001106884	8504.67	373.389	1.453916e+003	1.454304e+002	1298.5	33	6.356099e+000	0	0	0	0	0	0	1270.87	1	1	48.2044	32
DATA	2196	26	71	0	0	A_42_P635228	NM_001107651	8530.25	373.563	6.169028e+001	7.031315e+000	116	28.5	7.915198e+000	0	0	0	0	0	0	53.6697	1	1	47.5395	30.7083
DATA	2197	26	72	0	0	A_44_P254687	NM_001105728	8555.37	373.441	2.366883e+002	2.391032e+001	268	30	7.933923e+000	0	0	0	0	0	0	204.952	1	1	46.8651	31.5333
DATA	2198	26	73	0	0	A_64_P049628	NM_001169145	8580.43	373.608	7.839071e+003	7.839145e+002	6349.5	27	6.724747e+000	0	0	0	0	0	0	6756.94	1	1	49.1849	27.5
DATA	2199	26	74	0	0	A_64_P007703	NM_031674	8606.67	373.746	1.541281e+002	1.578802e+001	195.5	32	7.632589e+000	0	0	0	0	0	0	132.219	1	1	46.1809	32.5556
DATA	2200	26	75	0	0	A_42_P645376	NM_001014135	8631.44	373.74	3.565944e+004	3.565946e+003	30042.5	29	7.803204e+000	0	0	0	0	0	0	30452.9	1	1	49.5074	30.16
DATA	2201	26	76	0	0	A_64_P040920	XM_577408	8657.16	373.882	5.147732e+003	5.147848e+002	4458	29.5	5.247498e+000	0	0	0	0	0	0	4375.95	1	1	46.5243	29.3333
DATA	2202	26	77	0	0	A_42_P819656	NM_130409	8682.13	373.757	3.892591e+003	3.892745e+002	3270.5	31	7.710271e+000	0	0	0	0	0	0	3294.17	1	1	46.5243	30
DATA	2203	26	78	0	0	A_64_P018921	NM_001135012	8707.69	373.897	7.173024e+002	7.181480e+001	673.5	30	9.152553e+000	0	0	0	0	0	0	604.32	1	1	45.835	29
DATA	2204	26	79	0	0	A_43_P15253	NM_012967	8733.39	373.931	3.324223e+002	3.342592e+001	339	27	6.776517e+000	0	0	0	0	0	0	278.814	1	1	53.8203	27.2759
DATA	2205	26	80	0	0	A_64_P093063	NM_001136272	8758.15	374.015	5.591965e+002	5.602998e+001	525.5	31	9.856665e+000	0	0	0	0	0	0	467.039	1	1	46.8651	32
DATA	2206	26	81	0	0	A_44_P477406	NM_012751	8784	374	3.769019e+002	3.785511e+001	383	31.5	8.855587e+000	0	0	0	0	0	0	313.414	1	1	54.9904	31.75
DATA	2207	26	82	0	0	A_64_P056816	NM_001100697	8809.25	373.863	1.066663e+002	1.124019e+001	148.5	31	6.760745e+000	0	0	0	0	0	0	88.3242	1	1	47.8731	30.3214
DATA	2208	26	83	0	0	A_42_P580733	NM_001006981	8834.63	374	5.985135e+003	5.985241e+002	4891	28	8.546772e+000	0	0	0	0	0	0	4935.67	1	1	48.5334	30.2258
DATA	2209	26	84	66	1	DarkCorner	DarkCorner	8860.56	373.947	3.587043e+000	3.574062e+000	57.5	28.5	7.958296e+000	0	0	0	0	0	0	-4.31238	0	0	48.8603	30.9
DATA	2210	26	85	66	1	DarkCorner	DarkCorner	8885.5	374	3.600974e+000	3.596020e+000	65	27	7.473786e+000	0	0	0	0	0	0	1.97069	0	0	54.1152	27.1432
DATA	2211	27	1	66	1	DarkCorner	DarkCorner	6739.66	380.038	3.130628e+000	3.119379e+000	63.5	27	7.636545e+000	0	0	0	0	0	0	0.210999	0	0	49.1849	27.6432
DATA	2212	27	2	66	1	DarkCorner	DarkCorner	6764.99	380.159	3.110334e+000	3.099078e+000	58.5	30	8.185106e+000	0	0	0	0	0	0	-2.7716	0	0	46.8651	31.6875
DATA	2213	27	3	0	0	A_44_P289922	NM_139103	6790.44	380.027	5.036319e+002	5.045729e+001	540	31	8.977338e+000	0	0	0	0	0	0	479.933	1	1	48.5334	31.8519
DATA	2214	27	4	0	0	A_64_P117149	ENSRNOT00000065538	6816	380	1.003352e+001	3.222254e+000	72	33.5	8.562146e+000	0	0	0	0	0	0	9.61768	1	0	65	33
DATA	2215	27	5	0	0	A_42_P524308	NM_019213	6841.38	380	1.182090e+003	1.182482e+002	1174	34	1.074170e+001	0	0	0	0	0	0	1139.37	1	1	48.5334	36.4167
DATA	2216	27	6	0	0	A_64_P037562	XM_001070892	6866.64	380.219	5.739047e+002	5.747036e+001	625	33	4.492158e+000	0	0	0	0	0	0	556.063	1	1	44.7812	33.1111
DATA	2217	27	7	0	0	A_44_P267706	XR_085883	6892.5	380	9.915032e+000	3.173288e+000	73	29	6.945742e+000	0	0	0	0	0	0	9.65433	1	0	65	28.08
DATA	2218	27	8	0	0	A_64_P082569	XM_001053354	6917.5	380	3.011717e+000	3.005428e+000	65	29	7.087168e+000	0	0	0	0	0	0	1.62762	0	0	54.1152	29.8065
DATA	2219	27	9	0	0	A_64_P000539	NM_053930	6942.78	380.106	1.918747e+004	1.918749e+003	18916.5	35	1.055686e+001	0	0	0	0	0	0	18848.4	1	1	50.1463	36.7037
DATA	2220	27	10	0	0	A_43_P22124	NM_213625	6968.07	380.208	1.315731e+003	1.316068e+002	1346.5	31.5	9.292676e+000	0	0	0	0	0	0	1297.67	1	1	46.8651	32.9688
DATA	2221	27	11	0	0	A_44_P1012556	NM_001013988	6993.47	380.219	1.690245e+002	1.716054e+001	230	28	1.052663e+001	0	0	0	0	0	0	167.324	1	1	48.2044	31.68
DATA	2222	27	12	0	0	A_64_P115457	NM_001106361	7019.39	380.069	1.559660e+002	1.587401e+001	221	29.5	7.600603e+000	0	0	0	0	0	0	154.932	1	1	65	30.5588
DATA	2223	27	13	0	0	A_64_P064229	A_64_P064229	7044.5	380	3.531961e+001	4.599066e+000	96	31	8.103165e+000	0	0	0	0	0	0	35.1941	1	1	54.1152	32.375
DATA	2224	27	14	0	0	A_64_P039066	ENSRNOT00000041345	7069.91	380.065	7.308589e+001	7.876695e+000	137	32.5	9.763608e+000	0	0	0	0	0	0	73.0362	1	1	54.4085	33.9286
DATA	2225	27	15	0	0	A_42_P574960	ENSRNOT00000068719	7095.09	380.104	7.943475e+002	7.948875e+001	876	31	7.949572e+000	0	0	0	0	0	0	795.858	1	1	46.8651	30.9355
DATA	2226	27	16	0	0	A_42_P600215	NM_175844	7120.68	380.197	3.966750e+001	4.927178e+000	104	30.5	8.860931e+000	0	0	0	0	0	0	39.837	1	1	45.4864	32.3667
DATA	2227	27	17	0	0	A_42_P607770	NM_001134616	7145.68	380.4	1.359454e+004	1.359457e+003	13383	33	6.935310e+000	0	0	0	0	0	0	13680.9	1	1	50.7771	33.7931
DATA	2228	27	18	0	0	A_64_P003348	NM_001077660	7171.37	380.307	4.739926e+002	4.748858e+001	524	33	8.322000e+000	0	0	0	0	0	0	477.87	1	1	48.5334	33.5455
DATA	2229	27	19	0	0	A_64_P057828	A_64_P057828	7196.54	380.386	1.025863e+003	1.026275e+002	1100.5	32	6.383276e+000	0	0	0	0	0	0	1035.87	1	1	47.5395	31.3939
DATA	2230	27	20	0	0	A_64_P081765	NM_134355	7222.42	380.427	5.685680e+001	6.383878e+000	117	31	6.046826e+000	0	0	0	0	0	0	57.4881	1	1	57.5363	29.8889
DATA	2231	27	21	0	0	A_42_P758886	NM_019258	7247.31	379.844	4.044429e+002	4.054815e+001	473	33	8.256714e+000	0	0	0	1	0	0	409.315	1	1	45.4864	33.56
DATA	2232	27	22	0	0	A_42_P745470	XM_001066818	7272.86	380.278	1.179151e+004	1.179154e+003	11869	33	9.837183e+000	0	0	0	0	0	0	11944.5	1	1	47.8731	36.0625
DATA	2233	27	23	0	0	A_42_P800949	NM_031787	7298.18	379.776	3.858831e+002	3.869684e+001	450	30	9.636236e+000	0	0	0	0	0	0	391.083	1	1	46.1809	31.1842
DATA	2234	27	24	0	0	A_42_P738559	NM_012801	7323.67	380.389	2.284299e+004	2.284301e+003	22635	30	5.259786e+000	0	0	0	0	0	0	23161.9	1	1	48.2044	30.9643
DATA	2235	27	25	0	0	A_42_P749550	NM_001109359	7349.12	380.39	4.729064e+003	4.729152e+002	4723.5	31	8.094859e+000	0	0	0	0	0	0	4795.76	1	1	49.8279	31.5588
DATA	2236	27	26	0	0	A_64_P007493	ENSRNOT00000006658	7374.58	380.427	2.413755e+001	3.768898e+000	87	34	1.034601e+001	0	0	0	0	0	0	24.4762	1	1	57.5363	34
DATA	2237	27	27	0	0	A_64_P056182	NM_053363	7399.73	380.408	1.978321e+003	1.978533e+002	2031.5	28.5	9.380832e+000	0	0	0	0	0	0	2005.49	1	1	47.8731	30
DATA	2238	27	28	0	0	A_42_P818546	NM_001191600	7425.37	380.559	8.473627e+002	8.478577e+001	909	29	8.671854e+000	0	0	0	0	0	0	858.587	1	1	46.8651	31.6429
DATA	2239	27	29	0	0	A_44_P407948	XM_001055260	7450.67	380.5	2.389748e+001	3.756892e+000	87	31	5.483112e+000	0	0	0	0	0	0	24.1967	1	1	57.5363	30.7419
DATA	2240	27	30	66	-1	(-)3xSLv1	NegativeControl	7476.42	380.427	2.912097e+000	2.901558e+000	54	32	6.534153e+000	0	0	0	0	0	0	-9.57428	0	0	65	31.8148
DATA	2241	27	31	0	0	A_64_P044505	NM_031587	7501.61	380.423	3.469166e+002	3.481306e+001	423	31	7.436914e+000	0	0	0	0	0	0	350.55	1	1	47.8731	31
DATA	2242	27	32	0	0	A_42_P685138	NM_153621	7527	380.455	9.365825e+002	9.370340e+001	967.5	33	8.869125e+000	0	0	0	0	0	0	945.175	1	1	55.8519	33.9286
DATA	2243	27	33	0	0	A_64_P121747	ENSRNOT00000050332	7552.11	380.738	1.178782e+001	3.142059e+000	74	30.5	6.847921e+000	0	0	0	0	0	0	11.8793	1	0	45.835	29.3947
DATA	2244	27	34	0	0	A_42_P791436	NM_012750	7577.67	380.899	1.889169e+003	1.889394e+002	1938	32	6.714284e+000	0	0	0	0	0	0	1900.71	1	1	46.5243	31.2333
DATA	2245	27	35	0	0	A_44_P349309	NM_001100890	7602.99	381.075	3.523347e+002	3.535447e+001	425	28	7.776861e+000	0	0	0	0	0	0	353.853	1	1	46.8651	29.2903
DATA	2246	27	36	0	0	A_42_P502621	NM_024401	7628.26	380.928	6.865304e+001	7.463793e+000	136	32	7.769088e+000	0	0	0	0	0	0	68.8102	1	1	46.5243	32.3889
DATA	2247	27	37	0	0	A_43_P21574	NM_001012043	7653.26	380.37	7.443485e+001	8.001223e+000	141	34	1.279200e+001	0	0	0	0	0	0	74.4392	1	1	39.0882	35.575
DATA	2248	27	38	0	0	A_44_P496331	NM_001001085	7679.04	380.371	7.636577e+001	8.183647e+000	138	33	9.683486e+000	0	0	0	0	0	0	76.1906	1	1	46.8651	34.6452
DATA	2249	27	39	0	0	A_64_P016503	ENSRNOT00000003659	7704.67	380.5	1.363848e+002	1.395371e+001	194	37.5	9.311411e+000	0	0	0	0	0	0	135.736	1	1	57.5363	35.5357
DATA	2250	27	40	0	0	A_43_P13270	NM_134415	7730.33	380.5	2.986909e+004	2.986910e+003	28332	33.5	1.081750e+001	0	0	0	0	0	0	29648.1	1	1	57.5363	35.8056
DATA	2251	27	41	0	0	A_42_P553960	NM_001107831	7755.45	380.605	1.367645e+004	1.367648e+003	13402	36.5	8.923893e+000	0	0	0	0	0	0	13538.3	1	1	49.8279	35.375
DATA	2252	27	42	0	0	A_44_P428997	NM_001107661	7780.31	380.571	4.993114e+002	5.001961e+001	561	34	7.324399e+000	0	0	0	0	0	0	492.86	1	1	50.1463	34.1944
DATA	2253	27	43	0	0	A_42_P619926	NM_001106578	7806.42	380.573	1.309168e+002	1.342720e+001	190	31	7.109588e+000	0	0	0	0	0	0	128.821	1	1	57.5363	31.7097
DATA	2255	27	45	0	0	A_44_P524471	NM_001106408	7857.12	380.582	9.634927e+002	9.639603e+001	978	31	7.020823e+000	0	0	0	0	0	0	941.965	1	1	46.1809	31.4667
DATA	2256	27	46	0	0	A_43_P10009	XM_347035	7882.44	380.595	6.926377e+003	6.926442e+002	6815	32	1.157564e+001	0	0	0	0	0	0	6748.59	1	1	52.0157	33.7333
DATA	2257	27	47	0	0	A_64_P068112	A_64_P068112	7907.86	380.914	1.167242e+004	1.167246e+003	12057	31	8.823949e+000	0	0	0	0	0	0	11333.3	1	1	43.7019	31.8276
DATA	2258	27	48	0	0	A_44_P191715	NM_021666	7933.42	380.573	3.045287e+000	3.047037e+000	66	31	6.026614e+000	0	0	0	0	0	0	2.69577	0	0	57.5363	32.5152
DATA	2259	27	49	0	0	A_64_P035769	NM_001108962	7958.5	380.742	1.743062e+003	1.743328e+002	1757	29	5.218923e+000	0	0	0	0	0	0	1679.95	1	1	46.5243	29.6522
DATA	2260	27	50	0	0	A_64_P158469	XM_579990	7984.11	380.5	9.392914e+000	3.198420e+000	71	34	1.033821e+001	0	0	0	0	0	0	9.01738	1	0	65	34.9167
DATA	2261	27	51	0	0	A_43_P12811	NM_053464	8009.07	380.732	2.564559e+003	2.564742e+002	2461.5	36	8.077223e+000	0	0	0	0	0	0	2452.62	1	1	47.5395	35.0294
DATA	2262	27	52	0	0	A_44_P370694	NM_001107961	8034.89	380.5	2.006111e+001	3.677259e+000	81	31.5	7.614895e+000	0	0	0	0	0	0	19.1062	1	1	56.9804	31.2059
DATA	2263	27	53	0	0	A_42_P749550	NM_001109359	8059.99	380.384	4.729659e+003	4.729760e+002	4451	31	1.062569e+001	0	0	0	0	0	0	4486.17	1	1	48.8603	32.0303
DATA	2264	27	54	0	0	A_64_P125893	ENSRNOT00000021391	8085.7	380.645	2.281983e+004	2.281986e+003	21370.5	34	6.449895e+000	0	0	0	0	0	0	21554.6	1	1	49.5074	34.2963
DATA	2265	27	55	0	0	A_44_P1000653	NM_031531	8111	380.545	1.325078e+002	1.361331e+001	189	33	6.666667e+000	0	0	0	0	0	0	124.628	1	1	55.8519	32.8889
DATA	2266	27	56	0	0	A_64_P035992	A_64_P035992	8136.8	381.033	5.823459e+002	5.831887e+001	617.5	31.5	7.471216e+000	0	0	0	0	0	0	545.365	1	1	44.7812	31.3824
DATA	2267	27	57	0	0	A_42_P592385	NM_022935	8161.82	381.351	4.055508e+000	3.173589e+000	66	31	6.286862e+000	0	0	0	0	0	0	3.78182	1	0	47.8731	31.8966
DATA	2268	27	58	0	0	A_64_P065624	ENSRNOT00000039260	8187.88	381.138	9.826505e+000	3.311276e+000	69	32	7.595664e+000	0	0	0	0	0	0	9.12121	1	0	46.1809	31.8
DATA	2269	27	59	0	1	ERCC-00097_63	ERCC-00097_63	8212.93	381.23	4.555656e+001	5.553539e+000	104	29.5	6.405560e+000	0	0	0	0	0	0	42.1001	1	1	44.7812	29.6176
DATA	2270	27	60	0	0	A_42_P477625	NM_001108719	8237.71	381.167	5.146666e+003	5.146765e+002	4594	35.5	1.207372e+001	0	0	0	0	0	0	4735.06	1	1	45.835	37.1333
DATA	2271	27	61	0	0	A_42_P788030	NM_031618	8263.34	380.85	3.245361e+004	3.245363e+003	29381	33.5	7.538670e+000	0	0	0	0	0	0	29718.1	1	1	50.4627	33.3235
DATA	2272	27	62	0	0	A_44_P278247	XM_219377	8288.57	380.843	1.019652e+004	1.019657e+003	8975	30	7.090369e+000	0	0	0	0	0	0	9294.21	1	1	47.5395	30.76
DATA	2273	27	63	0	0	A_44_P189262	NM_024000	8313.94	381.031	2.092865e+004	2.092868e+003	18633	34	7.869227e+000	0	0	0	0	0	0	18988.9	1	1	46.8651	32.4839
DATA	2274	27	64	0	0	A_44_P212850	NM_019305	8339.5	381	4.722292e+001	5.732754e+000	103.5	30	7.969566e+000	0	0	0	1	0	0	42.6442	1	1	54.1152	31.2258
DATA	2275	27	65	0	0	A_64_P144278	NM_001106525	8364.79	380.806	1.495563e+004	1.495566e+003	13135	32	5.435637e+000	0	0	0	0	0	0	13441.8	1	1	47.5395	31.8846
DATA	2276	27	66	0	0	A_44_P683816	NM_001127488	8390.27	380.8	1.816244e+002	1.845645e+001	224	33	9.517618e+000	0	0	0	0	0	0	162.469	1	1	46.8651	34.6333
DATA	2277	27	67	0	0	A_64_P048712	A_64_P048712	8415.87	381.1	7.428048e+001	8.126741e+000	129	33	9.322190e+000	0	0	0	0	0	0	66.1348	1	1	46.8651	34.3548
DATA	2278	27	68	0	0	A_64_P012813	NM_001106456	8441.07	380.929	1.224482e+001	3.531410e+000	74.5	33	8.484014e+000	0	0	0	0	0	0	10.8505	1	0	46.8651	32.6129
DATA	2280	27	70	0	0	A_42_P598602	NM_001077646	8492	381	3.896612e+001	5.134675e+000	97	34	5.463663e+000	0	0	0	0	0	0	34.2036	1	1	54.9904	32.5806
DATA	2281	27	71	0	0	A_44_P375380	NM_001191572	8517.56	380.973	1.226907e+002	1.272078e+001	170	29	7.553537e+000	0	0	0	0	0	0	107.184	1	1	48.5334	30.5484
DATA	2282	27	72	0	0	A_64_P113555	NM_001000025	8542.57	380.92	9.888541e+000	3.517276e+000	69	33	9.580324e+000	0	0	0	0	0	0	8.59877	1	0	48.8603	33.6522
DATA	2283	27	73	0	0	A_42_P590466	NM_001009676	8568.17	380.986	5.117329e+003	5.117442e+002	4364	28	7.536435e+000	0	0	0	0	0	0	4429.01	1	1	46.8651	28.7419
DATA	2284	27	74	0	0	A_44_P224987	XM_001058317	8593.33	381.101	4.826511e+001	5.907790e+000	103	29	6.951445e+000	0	0	0	0	0	0	41.5822	1	1	46.5243	29.75
DATA	2285	27	75	0	0	A_42_P557315	NM_001106280	8619.03	381	6.855807e+003	6.855893e+002	5789	30.5	8.333067e+000	0	0	0	0	0	0	5878.86	1	1	46.8651	32
DATA	2286	27	76	0	0	A_44_P375364	A_44_P375364	8644.5	381	8.880085e+001	9.522622e+000	138	31	5.582285e+000	0	0	0	0	0	0	75.798	1	1	54.1152	30.5238
DATA	2287	27	77	0	0	A_44_P880152	NM_031553	8669.59	380.845	1.680018e+002	1.715162e+001	205	31	7.991983e+000	0	0	0	0	0	0	142.755	1	1	47.5395	30.1111
DATA	2288	27	78	0	0	A_64_P057575	NM_001191967	8695.29	381	1.758979e+002	1.792876e+001	211	33	8.480718e+000	0	0	0	0	0	0	148.794	1	1	49.1849	32.5484
DATA	2289	27	79	0	0	A_64_P122183	ENSRNOT00000009823	8720.44	380.894	5.055674e+001	6.140547e+000	102	29.5	9.901299e+000	0	0	0	0	0	0	42.5779	1	1	45.4864	30.5357
DATA	2290	27	80	0	0	A_64_P057587	NM_019313	8746.03	381.162	6.744111e+001	7.598371e+000	116	29	6.506306e+000	0	0	0	0	0	0	56.552	1	1	46.8651	27.8261
DATA	2291	27	81	0	0	A_42_P480769	XM_001081609	8771.07	381.2	5.254010e+002	5.265756e+001	503.5	28	8.609588e+000	0	0	0	0	0	0	438.708	1	1	46.8651	29.0625
DATA	2292	27	82	0	0	A_42_P623151	NM_031026	8796.56	381.027	3.076725e+004	3.076727e+003	25207	29.5	5.768424e+000	0	0	0	0	0	0	25580.4	1	1	48.5334	30.0333
DATA	2293	27	83	0	0	A_42_P550241	NM_022954	8822.09	381.065	1.973871e+001	4.057534e+000	77	30.5	9.048502e+000	0	0	0	0	0	0	16.3428	1	1	54.4085	31.1944
DATA	2294	27	84	66	1	DarkCorner	DarkCorner	8847.5	381	3.572531e+000	3.559602e+000	56	29	5.924669e+000	0	0	0	0	0	0	-4.4546	0	0	54.1152	30.0789
DATA	2295	27	85	66	1	DarkCorner	DarkCorner	8872.88	380.734	3.587064e+000	3.574082e+000	60	29.5	9.127561e+000	0	0	0	0	0	0	-0.053881	0	0	45.4864	30.8864
DATA	2296	28	1	66	1	DarkCorner	DarkCorner	6752.65	387.442	3.114398e+000	3.103127e+000	60	28	6.631747e+000	0	0	0	0	0	0	-2.86359	0	0	49.8279	28.1395
DATA	2297	28	2	0	0	A_42_P802550	NM_017365	6777.89	387.5	4.850267e+002	4.860060e+001	505	30.5	7.335945e+000	0	0	0	0	0	0	461.656	1	1	56.9804	31.3333
DATA	2299	28	4	0	0	A_42_P619926	NM_001106578	6828.58	387.427	1.351548e+002	1.385497e+001	190	35	8.874120e+000	0	0	0	0	0	0	130.14	1	1	57.5363	34.2
DATA	2300	28	5	0	0	A_64_P052441	ENSRNOT00000004876	6854.11	387.5	6.293881e+001	6.986085e+000	122	33	6.551687e+000	0	0	0	0	0	0	60.9303	1	1	56.9804	33.5357
DATA	2301	28	6	0	0	A_64_P056823	CA510211	6879.8	387.464	1.237998e+001	3.260726e+000	76.5	31	4.795383e+000	0	0	0	0	0	0	12.0458	1	0	46.8651	31.0645
DATA	2302	28	7	0	0	A_42_P669870	NM_001011919	6904.62	387.5	4.443558e+003	4.443659e+002	4386.5	30	7.037724e+000	0	0	0	0	0	0	4343.64	1	1	48.5334	29.6207
DATA	2303	28	8	0	0	A_42_P683634	NM_012946	6930.33	387.5	6.503655e+004	6.503655e+003	63745	30.5	6.117715e+000	0	0	0	0	0	0	63859	1	1	57.5363	30.5667
DATA	2304	28	9	0	0	A_42_P542809	NM_021671	6955.27	387.493	4.911750e+002	4.920765e+001	543.5	35	1.043141e+001	0	0	0	0	0	0	484.237	1	1	48.8603	37.2174
DATA	2305	28	10	0	0	A_64_P065887	ENSRNOT00000024693	6980.57	387.689	1.748526e+002	1.773499e+001	231	35	1.109122e+001	0	0	0	0	0	0	173.049	1	1	48.5334	34.7813
DATA	2306	28	11	0	0	A_64_P043406	NM_001024902	7006.07	387.718	1.639103e+003	1.639370e+002	1681	29	6.706011e+000	0	0	0	0	0	0	1628	1	1	47.2035	30.6176
DATA	2307	28	12	0	0	A_64_P060769	NM_001191090	7031.86	388.172	2.150008e+003	2.150210e+002	2222	34	8.717907e+000	0	0	0	0	0	0	2142.72	1	1	45.4864	33.7576
DATA	2308	28	13	0	0	A_64_P150789	A_64_P150789	7057.39	387.5	1.486016e+001	3.291297e+000	77	31	8.970385e+000	0	0	0	0	0	0	14.8522	1	1	49.1849	32.697
DATA	2309	28	14	0	0	A_64_P110254	NM_022404	7082.44	387.521	1.028277e+004	1.028281e+003	10383	32	1.049580e+001	0	0	0	0	0	0	10304.8	1	1	48.2044	32.1905
DATA	2310	28	15	0	0	A_42_P700753	FQ212883	7107.63	387.589	2.687985e+003	2.688144e+002	2667	32	7.405465e+000	0	0	0	0	0	0	2700.31	1	1	48.5334	33.1818
DATA	2311	28	16	0	0	A_42_P503768	NM_001009466	7133.5	387.5	4.046193e+002	4.056682e+001	461	32.5	1.007052e+001	0	0	0	0	0	0	407.37	1	1	57.5363	34.4375
DATA	2312	28	17	0	0	A_64_P106021	ENSRNOT00000017892	7158.67	387.5	1.227380e+002	1.261401e+001	189	33	7.710750e+000	0	0	0	0	0	0	123.808	1	1	57.5363	32.7931
DATA	2313	28	18	0	0	A_43_P10861	NM_001024879	7184.04	387.792	2.452154e+002	2.469299e+001	313	28.5	6.567819e+000	0	0	0	0	0	0	247.778	1	1	46.8651	29.8929
DATA	2314	28	19	0	0	A_44_P562251	BF545174	7209.11	387.648	1.342452e+002	1.373435e+001	200	32	6.474101e+000	0	0	0	0	0	0	135.835	1	1	47.8731	31.7742
DATA	2315	28	20	0	0	A_42_P608768	ENSRNOT00000009898	7234.7	387.973	1.954706e+002	1.976061e+001	261	29	6.031797e+000	0	0	0	0	0	0	198.031	1	1	48.8603	30.1515
DATA	2316	28	21	0	0	A_64_P117115	NM_001109329	7260.42	387.573	2.193500e+001	3.631893e+000	83	31	6.537236e+000	0	0	0	0	0	0	22.2416	1	1	57.5363	32.0714
DATA	2317	28	22	0	0	A_64_P043331	ENSRNOT00000032411	7285.58	387.573	1.959651e+002	1.980886e+001	260	30.5	9.085257e+000	0	0	0	0	0	0	198.842	1	1	57.5363	31.9412
DATA	2318	28	23	0	0	A_42_P664274	NM_001079705	7311.25	387.658	1.654517e+003	1.654769e+002	1725	30	5.925731e+000	0	0	0	0	0	0	1679.62	1	1	48.2044	29.9429
DATA	2319	28	24	0	0	A_64_P044593	NM_001173451	7336.58	387.573	5.917892e+002	5.924947e+001	653	31.5	7.276241e+000	0	0	0	0	0	0	600.904	1	1	57.5363	32.7667
DATA	2320	28	25	0	0	A_64_P006978	NM_001109371	7362	387.545	4.244455e+001	5.135257e+000	107	33.5	1.036081e+001	0	0	0	0	0	0	43.099	1	1	55.8519	34.2895
DATA	2321	28	26	0	0	A_64_P119390	NM_001109519	7387.35	388	2.722287e+001	3.970917e+000	89	30	9.402127e+000	0	0	0	0	0	0	27.6395	1	1	41.4593	31
DATA	2322	28	27	0	0	A_64_P034714	A_64_P034714	7412.58	387.573	2.651579e+001	3.923802e+000	89	32	8.547635e+000	0	0	0	0	0	0	26.9087	1	1	57.5363	31.8
DATA	2323	28	28	0	0	A_44_P535959	NM_001107650	7437.94	388.175	4.591955e+002	4.601064e+001	523	28.5	7.400312e+000	0	0	0	0	0	0	465.767	1	1	45.4864	30.2692
DATA	2324	28	29	0	0	A_64_P286274	ENSRNOT00000055318	7463.5	387.7	2.092397e+002	2.112348e+001	277	32	6.285025e+000	0	0	0	0	0	0	212.043	1	1	47.2035	32.3077
DATA	2325	28	30	0	0	A_44_P333384	NM_001024788	7488.91	387.614	2.959105e+001	4.142743e+000	92	33	7.019712e+000	0	0	0	0	0	0	29.9568	1	1	57.259	32.2593
DATA	2326	28	31	0	0	A_42_P522194	NM_012914	7514.06	387.757	1.923833e+002	1.945607e+001	255	33	6.240935e+000	0	0	0	0	0	0	194.536	1	1	46.8651	31.4167
DATA	2327	28	32	0	0	A_44_P273859	NM_017021	7539.5	388	3.606548e+000	2.928867e+000	66	31.5	8.228683e+000	0	0	0	0	0	0	3.642	1	0	54.1152	31.5294
DATA	2328	28	33	0	0	A_43_P11665	NM_013024	7565.09	387.935	6.565131e+001	7.181645e+000	129	31	7.281495e+000	0	0	0	0	0	0	66.1915	1	1	54.4085	30.2571
DATA	2329	28	34	0	0	A_64_P118273	NM_001170593	7590.11	387.723	6.140461e+001	6.797801e+000	126	32.5	8.969232e+000	0	0	0	0	0	0	61.8014	1	1	45.835	31.9667
DATA	2330	28	35	0	0	A_42_P762814	NM_031318	7615.3	388.1	5.301763e+003	5.301843e+002	5234.5	31	5.835192e+000	0	0	0	0	0	0	5326.28	1	1	47.2035	31.129
DATA	2331	28	36	0	0	A_44_P384017	NM_031688	7640.91	388.104	2.674790e+002	2.690766e+001	331	33.5	9.149238e+000	0	0	0	0	0	0	268.154	1	1	46.8651	33.4412
DATA	2332	28	37	0	0	A_64_P118872	A_64_P118872	7666.64	388.063	7.672722e+000	3.033087e+000	71.5	34	1.158585e+001	0	0	0	0	0	0	7.6746	1	0	45.1352	36.3429
DATA	2333	28	38	0	0	A_42_P599210	NM_001008326	7691.85	387.903	1.132657e+003	1.133039e+002	1177	35	8.843466e+000	0	0	0	0	0	0	1130.21	1	1	46.8651	34.7241
DATA	2334	28	39	0	0	A_44_P305801	NM_001033894	7717.09	387.896	5.276049e+003	5.276131e+002	5163	36	1.035432e+001	0	0	0	0	0	0	5251.33	1	1	46.8651	35.6316
DATA	2335	28	40	0	0	A_64_P085462	A_64_P085462	7742.61	387.931	6.419314e+004	6.419314e+003	63554	32	9.808050e+000	0	0	0	0	0	0	63720.1	1	1	53.8203	34.7419
DATA	2336	28	41	0	0	A_42_P488000	NM_001108479	7768.23	388.116	2.059381e+003	2.059595e+002	2030.5	32	9.040958e+000	0	0	0	0	0	0	2038.43	1	1	46.5243	33.1034
DATA	2337	28	42	0	0	A_42_P818546	NM_001191600	7793.43	388.1	8.576034e+002	8.581189e+001	914	31	7.004319e+000	0	0	0	0	0	0	846.378	1	1	47.5395	32.1875
DATA	2338	28	43	0	0	A_44_P488489	TC610872	7818.85	388.097	1.854454e+003	1.854693e+002	1845	31	1.778612e+001	0	0	0	0	0	0	1824.5	1	1	46.8651	37.1154
DATA	2339	28	44	0	0	A_64_P153971	A_64_P153971	7844.5	388	9.094593e+000	3.128254e+000	73	31	8.544852e+000	0	0	0	0	0	0	8.91841	1	0	54.1152	32.1667
DATA	2340	28	45	0	0	A_64_P077985	NM_001170478	7869.44	387.973	4.808035e+001	5.668801e+000	109	36	1.003137e+001	0	0	0	0	0	0	46.9938	1	1	48.5334	34.087
DATA	2341	28	46	0	0	A_44_P576822	NM_080771	7894.63	387.957	1.604391e+003	1.604674e+002	1600	32	8.929912e+000	0	0	0	0	0	0	1562.75	1	1	46.8651	33.92
DATA	2342	28	47	0	0	A_64_P134310	A_64_P134310	7920.3	387.97	7.356722e+001	7.954093e+000	133	31.5	7.430365e+000	0	0	0	0	0	0	71.3993	1	1	45.4864	32.3929
DATA	2343	28	48	0	0	A_64_P134706	NM_001107533	7946	388	9.845413e+000	3.191221e+000	72	30	6.540527e+000	0	0	0	0	0	0	9.51978	1	0	54.9904	31.6129
DATA	2344	28	49	0	0	A_42_P469751	XM_001054007	7971.09	388.104	3.104447e+002	3.119363e+001	352	30	6.452603e+000	0	0	0	0	0	0	299.062	1	1	46.8651	30.9063
DATA	2345	28	50	0	0	A_64_P082653	ENSRNOT00000020906	7996.33	388.096	8.522290e+001	9.054540e+000	141.5	33.5	8.866458e+000	0	0	0	0	0	0	81.7822	1	1	48.8603	33.8529
DATA	2346	28	51	0	0	A_43_P18902	NM_001109221	8021.79	388.127	1.453662e+002	1.485743e+001	197	36	8.667966e+000	0	0	0	0	0	0	138.944	1	1	46.8651	35.7568
DATA	2347	28	52	0	0	A_64_P086719	ENSRNOT00000065918	8047.5	388	1.545232e+001	3.449044e+000	76	34	7.358543e+000	0	0	0	0	0	0	14.7088	1	1	54.1152	34.0741
DATA	2348	28	53	0	0	A_64_P138585	TC587165	8072.87	387.944	5.717666e+003	5.717750e+002	5371	31	9.342443e+000	0	0	0	0	0	0	5420.02	1	1	46.8651	31.4063
DATA	2349	28	54	0	0	A_64_P230444	ENSRNOT00000010282	8098.43	388.103	6.220091e+003	6.220169e+002	5877	33.5	6.634982e+000	0	0	0	0	0	0	5871.54	1	1	46.5243	33.6667
DATA	2350	28	55	0	0	A_64_P124427	TC642834	8124.06	387.766	1.020828e+002	1.067533e+001	159	30.5	6.256933e+000	0	0	0	0	0	0	95.9402	1	1	45.4864	31.2222
DATA	2351	28	56	0	0	A_42_P778587	NM_001135767	8149	387.576	4.213331e+002	4.224990e+001	457	28.5	7.193187e+000	0	0	0	0	0	0	394.278	1	1	45.4864	29.5
DATA	2352	28	57	0	0	A_42_P526030	NM_057197	8174.42	388.122	8.936048e+003	8.936104e+002	8276	31	4.965837e+000	0	0	0	0	0	0	8326.36	1	1	48.5334	31.3529
DATA	2353	28	58	0	0	A_64_P022561	XM_001070923	8199.8	388.314	9.759493e+001	1.025957e+001	154	29	5.805368e+000	0	0	0	0	0	0	90.5354	1	1	47.2035	29.2333
DATA	2354	28	59	0	0	A_64_P126226	NM_001105901	8225.42	388.427	1.814584e+002	1.842209e+001	234.5	36.5	6.501242e+000	0	0	0	0	0	0	167.572	1	1	57.5363	34.1154
DATA	2355	28	60	0	0	A_64_P089541	NM_001106214	8250.58	388.427	1.879570e+002	1.906494e+001	234	35.5	1.291129e+001	0	0	0	0	0	0	172.792	1	1	57.5363	37.6923
DATA	2356	28	61	0	0	A_44_P205869	NM_138891	8276.03	387.866	7.267443e+002	7.274519e+001	691	31	6.220497e+000	0	0	0	0	0	0	664.962	1	1	46.8651	31.8621
DATA	2357	28	62	0	0	A_44_P491796	NM_012881	8301.5	388.352	5.659352e+001	6.512479e+000	117.5	32	7.978427e+000	0	0	0	0	0	0	51.5481	1	1	57.5363	32.303
DATA	2358	28	63	0	0	A_64_P132706	NM_001008304	8327	388.455	6.493292e+004	6.493293e+003	57075	32	7.507637e+000	0	0	0	0	0	0	58869.6	1	1	55.8519	32.2692
DATA	2359	28	64	0	0	A_64_P040715	NM_001011979	8352.4	387.776	1.235057e+003	1.235486e+002	1174	31.5	6.618340e+000	0	0	0	0	0	0	1114.34	1	1	46.5243	30.9375
DATA	2360	28	65	0	0	A_44_P191055	NM_001107693	8377.37	388.127	2.662716e+003	2.662916e+002	2403	34.5	8.277831e+000	0	0	0	0	0	0	2391.57	1	1	47.5395	33.3214
DATA	2361	28	66	0	0	A_64_P077493	XR_005942	8403.11	388.5	1.052232e+001	3.447767e+000	72	31	7.595353e+000	0	0	0	0	0	0	9.40665	1	0	56.9804	31.4242
DATA	2362	28	67	0	0	A_44_P317600	NM_012612	8428.28	387.971	3.629422e+002	3.644385e+001	375	30	7.436531e+000	0	0	0	0	0	0	322.908	1	1	46.1809	30.9259
DATA	2363	28	68	0	0	A_42_P751368	NM_001047874	8453.73	388.342	1.825476e+003	1.825777e+002	1623.5	31	8.499050e+000	0	0	0	0	0	0	1616.6	1	1	48.2044	31.0769
DATA	2364	28	69	0	0	A_42_P711568	NM_001107584	8479.38	388	1.250473e+004	1.250477e+003	10765	29.5	6.751347e+000	0	0	0	0	0	0	11020.4	1	1	48.5334	31.1071
DATA	2365	28	70	0	0	A_64_P091817	A_64_P091817	8504.86	388.311	1.319517e+003	1.319942e+002	1245	33	6.452306e+000	0	0	0	0	0	0	1157.5	1	1	48.8603	32.0323
DATA	2366	28	71	0	0	A_64_P006628	NM_172328	8530.25	388.032	9.900118e+001	1.045538e+001	153	28	9.221463e+000	0	0	0	0	0	0	86.4334	1	1	45.4864	30.6538
DATA	2367	28	72	0	0	A_64_P057760	NM_001191643	8555.5	388.5	3.511986e+002	3.528186e+001	357.5	29	7.055618e+000	0	0	0	0	0	0	305.23	1	1	65	30.8214
DATA	2368	28	73	0	0	A_44_P150013	NM_001134495	8580.67	388.5	3.405092e+000	3.392768e+000	60	26	4.891122e+000	0	0	0	0	0	0	-1.71666	0	0	57.5363	26.6667
DATA	2369	28	74	0	0	A_44_P526975	NM_001002822	8606.06	388.47	2.820310e+002	2.840832e+001	304	31	9.901797e+000	0	0	0	0	0	0	242.866	1	1	45.1352	33.7407
DATA	2370	28	75	66	-1	(-)3xSLv1	NegativeControl	8631.5	388.5	3.436557e+000	3.424120e+000	49	30	1.312989e+001	0	0	0	0	0	0	-11.666	0	0	57.5363	35.4138
DATA	2371	28	76	0	0	A_42_P648937	NM_001191732	8656.67	388.371	1.665958e+003	1.666313e+002	1456	26.5	6.308494e+000	0	0	0	0	0	0	1421.6	1	1	47.8731	27.6667
DATA	2372	28	77	0	0	A_44_P533786	NM_053749	8682.5	388.5	1.477153e+001	3.757794e+000	75	30	7.974190e+000	0	0	0	0	0	0	12.5479	1	0	57.5363	30.3438
DATA	2373	28	78	0	0	A_64_P156165	S68987	8707.56	388.452	5.566097e+003	5.566206e+002	4682	32	9.243158e+000	0	0	0	0	0	0	4707.49	1	1	49.1849	32.3103
DATA	2374	28	79	0	0	A_64_P084293	NM_001000525	8733.4	388.373	2.187503e+001	4.115564e+000	81	30	9.244375e+000	0	0	0	0	0	0	18.418	1	1	46.1809	31.5385
DATA	2375	28	80	0	0	A_42_P708569	NM_001191837	8758.65	387.984	1.112738e+004	1.112743e+003	9336	31	8.490987e+000	0	0	0	0	0	0	9327.78	1	1	44.0646	32.4074
DATA	2376	28	81	0	0	A_64_P112215	NM_001110141	8784	388.545	3.227671e+002	3.246762e+001	331	30.5	7.043347e+000	0	0	0	0	0	0	269.462	1	1	65	29.3611
DATA	2377	28	82	0	0	A_42_P567793	NM_001107668	8809.19	388.481	3.662388e+003	3.662558e+002	2977	31	8.800421e+000	0	0	0	0	0	0	3044.86	1	1	49.8279	31.6471
DATA	2378	28	83	0	0	A_42_P481087	XM_232226	8834.46	388.595	1.582214e+003	1.582611e+002	1321	30.5	6.688911e+000	0	0	0	0	0	0	1310.12	1	1	49.1849	31.5294
DATA	2379	28	84	66	1	DarkCorner	DarkCorner	8860.33	388.5	3.572267e+000	3.559338e+000	60	28.5	8.123355e+000	0	0	0	0	0	0	-0.167768	0	0	57.5363	30.5
DATA	2380	28	85	66	1	DarkCorner	DarkCorner	8885.84	388.687	3.586166e+000	3.573188e+000	59	27	7.689895e+000	0	0	0	0	0	0	-1.72487	0	0	51.0895	27.1481
DATA	2381	29	1	66	1	DarkCorner	DarkCorner	6739.38	394.61	4.157571e+000	3.135907e+000	65	27	7.796763e+000	0	0	0	0	0	0	3.92607	1	0	49.8279	27.6578
DATA	2382	29	2	66	1	DarkCorner	DarkCorner	6765.42	394.573	3.099064e+000	3.087848e+000	61	31	8.626914e+000	0	0	0	0	0	0	-2.76696	0	0	57.5363	31.931
DATA	2383	29	3	0	0	A_64_P096512	NM_031782	6790.27	394.857	2.350155e+004	2.350157e+003	21673.5	34	8.139804e+000	0	0	0	0	0	0	22474.6	1	1	49.5074	32.8889
DATA	2384	29	4	0	0	A_44_P172814	NM_173102	6815.89	394.807	3.229928e+004	3.229929e+003	30978	39	8.088622e+000	0	0	0	0	0	0	31068.1	1	1	51.0895	36.6774
DATA	2385	29	5	0	0	A_42_P788040	NM_001025053	6841.25	394.716	1.379720e+002	1.412705e+001	193	34	7.797907e+000	0	0	0	0	0	0	133.436	1	1	45.4864	34.0455
DATA	2386	29	6	0	0	A_42_P808945	NM_181368	6866.63	394.873	7.712960e+002	7.718868e+001	797	32	5.493391e+000	0	0	0	1	0	0	749.813	1	1	47.5395	31.9655
DATA	2387	29	7	0	0	A_64_P162713	A_64_P162713	6892.42	394.573	2.090340e+001	3.660248e+000	84	33	6.833252e+000	0	0	0	0	0	0	20.4199	1	1	65	31.88
DATA	2388	29	8	0	0	A_44_P501204	NM_017361	6917.58	394.573	2.292591e+002	2.312022e+001	287.5	31.5	6.246209e+000	0	0	0	0	0	0	224.966	1	1	57.5363	30.7813
DATA	2389	29	9	0	0	A_42_P785926	NM_001108289	6943	394.545	1.132211e+003	1.132602e+002	1154	33	9.418676e+000	0	0	0	0	0	0	1115.73	1	1	65	34.4348
DATA	2390	29	10	0	0	A_42_P616287	NM_001134555	6968.18	395.254	1.491160e+002	1.520379e+001	212.5	34.5	9.594550e+000	0	0	0	0	0	0	147.544	1	1	45.835	33.8462
DATA	2391	29	11	66	-1	(-)3xSLv1	NegativeControl	6993.58	394.573	2.966729e+000	2.955992e+000	56	29.5	1.018501e+001	0	0	0	0	0	0	-6.03216	0	0	57.5363	32.3
DATA	2392	29	12	0	0	A_43_P12365	NM_023101	7019.42	394.573	4.502937e+001	5.380937e+000	107	29	7.399444e+000	0	0	0	0	0	0	44.8658	1	1	57.5363	30.2895
DATA	2393	29	13	0	0	A_64_P076643	ENSRNOT00000057620	7044.5	394.648	1.082805e+001	3.130064e+000	75	31	8.617078e+000	0	0	0	0	0	0	10.8219	1	0	57.5363	33.0625
DATA	2394	29	14	0	0	A_64_P074865	XR_008898	7069.91	394.614	1.201597e+001	3.165462e+000	71	29.5	7.946372e+000	0	0	0	0	0	0	12.0431	1	0	57.259	29.4
DATA	2395	29	15	0	0	A_64_P009582	XM_214287	7095.07	395	2.484697e+004	2.484698e+003	24711	38	1.190016e+001	0	0	0	0	0	0	24968.2	1	1	46.8651	37.8
DATA	2396	29	16	0	0	A_44_P527270	NM_020073	7120.58	394.573	9.665905e+001	1.009572e+001	159	33	7.565926e+000	0	0	0	0	0	0	97.3464	1	1	57.5363	33.9189
DATA	2397	29	17	0	0	A_44_P530813	NM_012922	7146.3	395.1	6.181654e+002	6.188491e+001	675	33	6.530018e+000	0	0	0	0	0	0	623.906	1	1	47.2035	33.0625
DATA	2398	29	18	0	0	A_64_P078210	NM_001044303	7171.73	394.757	4.343551e+001	5.224448e+000	107	32.5	8.315682e+000	0	0	0	0	0	0	43.9139	1	1	46.8651	33.4333
DATA	2399	29	19	0	0	A_42_P764985	NM_133402	7196.74	395.037	7.648752e+003	7.648807e+002	7453	31	6.403347e+000	0	0	0	0	0	0	7745.03	1	1	49.1849	31.8148
DATA	2400	29	20	0	0	A_43_P23097	NM_001011965	7222.13	395.134	3.096688e+001	4.239096e+000	92.5	28.5	6.317294e+000	0	0	0	0	0	0	31.3974	1	1	46.1809	29.9706
DATA	2401	29	21	0	0	A_43_P19450	NM_001105713	7247.57	394.843	1.602725e+002	1.628609e+001	225	33	7.254537e+000	0	0	0	0	0	0	162.661	1	1	47.5395	33.9643
DATA	2402	29	22	0	0	A_42_P514419	NM_001009599	7273	395	1.537054e+003	1.537326e+002	1573	33	7.567905e+000	0	0	0	0	0	0	1561.26	1	1	46.8651	32.7813
DATA	2403	29	23	0	0	A_64_P123974	A_64_P123974	7298.19	395.219	1.159610e+001	3.112002e+000	75	31	8.464344e+000	0	0	0	0	0	0	11.7859	1	0	45.1352	31.1707
DATA	2404	29	24	0	0	A_64_P221399	NM_134415	7323.78	395	3.817204e+003	3.817314e+002	3963	32	4.797513e+000	0	0	0	0	0	0	3880.88	1	1	46.1809	31.375
DATA	2405	29	25	0	0	A_44_P760124	A_44_P760124	7349	395	4.277708e+002	4.287436e+001	507	31	8.980755e+000	0	0	0	0	0	0	434.961	1	1	46.8651	32.5556
DATA	2406	29	26	0	0	A_42_P589551	NM_001037093	7374.44	395.027	3.426365e+003	3.426487e+002	3490	30	8.737130e+000	0	0	0	0	0	0	3483.65	1	1	48.5334	30.8621
DATA	2407	29	27	0	0	A_42_P645467	NM_001108804	7399.57	395.329	1.743004e+001	3.372875e+000	79	33	9.778895e+000	0	0	0	0	0	0	17.7171	1	1	48.5334	32.3704
DATA	2408	29	28	0	0	A_64_P036006	A_64_P036006	7425.5	395	7.724774e+000	2.990759e+000	70	29	8.828276e+000	0	0	0	0	0	0	7.84742	1	0	54.1152	30.5385
DATA	2409	29	29	0	0	A_64_P088575	NM_001106355	7450.5	394.788	5.493117e+002	5.500722e+001	612	32	5.708244e+000	0	0	0	0	0	0	557.62	1	1	46.5243	31.2593
DATA	2410	29	30	0	0	A_42_P798776	XM_002725203	7476.16	394.897	6.836942e+003	6.837004e+002	6900	33	5.626353e+000	0	0	0	0	0	0	6934.09	1	1	46.5243	34.3182
DATA	2411	29	31	0	0	A_64_P017424	XM_001067041	7501.61	395.119	2.907646e+000	2.897421e+000	63	30	6.263120e+000	0	0	0	0	0	0	0.420678	0	0	46.1809	30.32
DATA	2412	29	32	0	0	A_64_P147358	NM_001105764	7526.6	395.088	2.471491e+003	2.471661e+002	2550	34	6.690555e+000	0	0	0	0	0	0	2500.74	1	1	46.5243	32.9259
DATA	2413	29	33	0	0	A_42_P522285	NM_001044263	7551.86	395.211	5.171700e+002	5.179853e+001	571.5	30	6.261393e+000	0	0	0	0	0	0	522.535	1	1	47.2035	30.0286
DATA	2414	29	34	0	0	A_64_P130184	NM_017207	7577.66	395.091	3.170160e+003	3.170293e+002	3286	29.5	8.134950e+000	0	0	0	0	0	0	3197.61	1	1	49.1849	29.625
DATA	2415	29	35	0	0	A_44_P167930	NM_012720	7602.79	395.194	2.840518e+003	2.840667e+002	2944	31	5.288502e+000	0	0	0	0	0	0	2859.99	1	1	47.5395	30.5556
DATA	2416	29	36	0	0	A_64_P135305	NM_001013426	7628.23	395.116	1.058091e+004	1.058095e+003	10468.5	34	6.260192e+000	0	0	0	0	0	0	10632.1	1	1	46.5243	33.24
DATA	2417	29	37	0	0	A_64_P100182	NM_001077678	7654	395	1.299293e+001	3.202868e+000	75	34	1.234024e+001	0	0	0	0	0	0	13.0269	1	0	54.9904	36.225
DATA	2418	29	38	0	0	A_44_P521699	NM_001007728	7679.38	395	2.665802e+002	2.681903e+001	328	29.5	5.743223e+000	0	0	0	0	0	0	266.66	1	1	48.5334	29.7692
DATA	2419	29	39	0	0	A_64_P053516	NM_001001280	7704.61	395.069	1.039268e+001	3.119645e+000	74.5	33	8.891935e+000	0	0	0	0	0	0	10.3704	1	0	53.8203	33.069
DATA	2420	29	40	0	0	A_64_P073183	XM_001061392	7730	395.203	7.601068e+003	7.601125e+002	7388	31	9.934914e+000	0	0	0	0	0	0	7565.16	1	1	46.8651	33.0571
DATA	2421	29	41	0	0	A_64_P067447	NM_001109440	7755.3	395.224	1.859049e+003	1.859285e+002	1893	30	8.664633e+000	0	0	0	0	0	0	1845.19	1	1	45.835	32.6
DATA	2422	29	42	0	0	A_64_P089251	NM_001014109	7780.91	395.386	1.170923e+002	1.207898e+001	182.5	32.5	7.231135e+000	0	0	0	0	0	0	115.884	1	1	57.259	32.0313
DATA	2423	29	43	0	0	A_64_P118192	NM_022797	7806.27	395.284	7.612029e+002	7.617840e+001	813	31	4.500940e+000	0	0	0	0	0	0	751.056	1	1	48.8603	29.5385
DATA	2424	29	44	0	0	A_64_P082584	ENSRNOT00000024258	7831.37	395.265	1.311026e+002	1.344559e+001	192	37	1.305078e+001	0	0	0	0	0	0	128.951	1	1	46.5243	36.7857
DATA	2425	29	45	0	0	A_42_P465677	NM_001106241	7857.06	394.825	3.028787e+002	3.043552e+001	357	35	1.535519e+001	0	0	0	0	0	0	296.897	1	1	45.4864	37.8214
DATA	2426	29	46	0	0	A_42_P781999	NM_001106378	7882.56	395.266	2.853041e+004	2.853042e+003	27633	35	1.051563e+001	0	0	0	0	0	0	27873.9	1	1	50.7771	34.4615
DATA	2427	29	47	0	0	A_44_P991472	NM_134374	7907.69	395.338	1.374490e+003	1.374820e+002	1323.5	33	9.507665e+000	0	0	0	0	0	0	1338.22	1	1	48.5334	34.0645
DATA	2428	29	48	0	0	A_42_P767737	AY724480	7933.14	395.278	5.041178e+003	5.041269e+002	4916.5	31	7.389463e+000	0	0	0	0	0	0	4890.31	1	1	47.8731	33.3333
DATA	2429	29	49	0	0	A_42_P648200	NM_001037356	7958.58	395.427	1.897846e+002	1.921991e+001	242	34	7.852486e+000	0	0	0	0	0	0	183.424	1	1	57.5363	33.3077
DATA	2430	29	50	0	0	A_64_P006062	NM_001191695	7983.51	395.441	1.882736e+002	1.907254e+001	247	32	6.080664e+000	0	0	0	0	0	0	181.283	1	1	46.5243	31.5676
DATA	2431	29	51	0	0	A_42_P728230	NM_001037782	8009.13	395.377	5.960560e+003	5.960639e+002	5516	35.5	1.069179e+001	0	0	0	0	0	0	5716.57	1	1	46.8651	35.8333
DATA	2432	29	52	0	0	A_64_P106011	A_64_P106011	8034.89	395.5	3.083965e+000	3.078030e+000	66	35	9.191735e+000	0	0	0	0	0	0	1.71245	0	0	56.9804	35.8919
DATA	2433	29	53	0	0	A_42_P622661	NM_001024292	8059.97	395.104	2.526336e+003	2.526524e+002	2375	34	8.207047e+000	0	0	0	0	0	0	2403.26	1	1	46.8651	33.0882
DATA	2434	29	54	0	0	A_42_P619844	NM_001030037	8085.56	395.26	1.052132e+004	1.052137e+003	9610.5	31	9.193460e+000	0	0	0	0	0	0	9967.2	1	1	49.5074	32.3448
DATA	2436	29	56	0	0	A_64_P128260	XM_001056985	8136.12	395.418	1.333951e+003	1.334317e+002	1270	30	6.362309e+000	0	0	0	0	0	0	1253.05	1	1	46.1809	30.4865
DATA	2437	29	57	0	0	A_44_P1034950	NM_053294	8161.4	395.562	3.626378e+002	3.639932e+001	402	30.5	5.730121e+000	0	0	0	0	0	0	339.178	1	1	48.2044	30.7632
DATA	2438	29	58	0	0	A_64_P080316	NM_139113	8187.4	395.44	2.392807e+002	2.413484e+001	281	29	7.309012e+000	0	0	0	0	0	0	222.785	1	1	49.5074	30.037
DATA	2439	29	59	0	0	A_64_P053069	NM_001106820	8212.44	395.521	8.943034e+002	8.948637e+001	861	33	6.227756e+000	0	0	0	0	0	0	829.004	1	1	48.2044	31.4194
DATA	2440	29	60	0	0	A_42_P498066	NM_031136	8238.11	395.5	9.435456e+004	9.435457e+003	85845	35	9.200056e+000	0	0	0	0	0	0	87066.3	1	1	56.9804	34.5556
DATA	2441	29	61	0	0	A_44_P277068	ENSRNOT00000058491	8263.19	395.412	6.770034e+003	6.770109e+002	6274	31	1.288741e+001	0	0	0	0	0	0	6218.92	1	1	46.5243	35.9091
DATA	2442	29	62	0	0	A_44_P685613	XM_225679	8288.5	395.5	2.523550e+003	2.523754e+002	2336.5	33	6.191326e+000	0	0	0	0	0	0	2307.58	1	1	49.1849	32.7586
DATA	2443	29	63	0	0	A_64_P124364	ENSRNOT00000015807	8314.33	395.5	3.381122e+002	3.396468e+001	367	35	6.611305e+000	0	0	0	0	0	0	307.725	1	1	65	35.069
DATA	2444	29	64	0	0	A_42_P466362	NM_017142	8339	395.358	1.629421e+003	1.629743e+002	1491	32	7.533004e+000	0	0	0	0	0	0	1476.25	1	1	45.4864	31.8846
DATA	2445	29	65	0	0	A_64_P081517	ENSRNOT00000037639	8365	395.545	1.189442e+002	1.233178e+001	170	30	6.207740e+000	0	0	0	0	0	0	107.254	1	1	55.8519	30.2703
DATA	2446	29	66	0	0	A_42_P629394	NM_031683	8389.89	395.352	3.896910e+003	3.897047e+002	3365	34	6.882307e+000	0	0	0	0	0	0	3497.67	1	1	47.8731	33.6154
DATA	2447	29	67	0	0	A_44_P500975	NM_001000833	8415.56	395.62	4.078100e+001	5.236952e+000	98	30	7.629043e+000	0	0	0	0	0	0	36.4319	1	1	47.8731	31.0667
DATA	2448	29	68	0	0	A_64_P165046	ENSRNOT00000015927	8441.33	395.5	8.022444e+001	8.675157e+000	132.5	31	7.437922e+000	0	0	0	0	0	0	71.3262	1	1	57.5363	30.9714
DATA	2449	29	69	0	0	A_44_P222865	XM_235305	8466.46	395.386	1.297225e+004	1.297229e+003	11468	31	6.612362e+000	0	0	0	0	0	0	11479.6	1	1	47.5395	32.16
DATA	2451	29	71	0	0	A_64_P131688	XM_574187	8517.15	395.554	1.885457e+001	3.842228e+000	78	30	8.439167e+000	0	0	0	0	0	0	16.5306	1	1	48.5334	30.5667
DATA	2452	29	72	0	0	A_42_P556457	NM_001033931	8542.58	395.573	2.913655e+003	2.913849e+002	2623	28	8.865794e+000	0	0	0	1	0	0	2542.64	1	1	57.5363	30.4667
DATA	2453	29	73	0	0	A_42_P734384	NM_001108406	8568.33	395.5	2.576038e+003	2.576260e+002	2190	28	7.385367e+000	0	0	0	1	0	0	2237.43	1	1	57.5363	28.8929
DATA	2454	29	74	0	0	A_42_P728032	XM_001066058	8593.36	395.87	1.978173e+003	1.978464e+002	1768	29	5.839605e+000	0	0	0	0	0	0	1710.52	1	1	46.8651	29.3793
DATA	2455	29	75	0	0	A_64_P151525	A_64_P151525	8619	395.545	5.703166e+001	6.645080e+000	112.5	31	9.570369e+000	0	0	0	0	0	0	49.0838	1	1	55.8519	33.8333
DATA	2456	29	76	0	0	A_43_P19276	ENSRNOT00000039523	8644.37	395.873	8.359339e+002	8.366355e+001	759	28	8.387832e+000	0	0	0	0	0	0	716.246	1	1	47.5395	30.087
DATA	2457	29	77	0	0	A_44_P529811	NM_001107657	8669.58	395.573	1.468369e+001	3.741390e+000	74	31	9.622778e+000	0	0	0	0	0	0	12.5244	1	0	57.5363	32.2581
DATA	2458	29	78	0	0	A_64_P104640	A_64_P104640	8695.05	395.603	3.961658e+004	3.961660e+003	33663	34	9.850714e+000	0	0	0	0	0	0	33640.7	1	1	49.5074	32.3548
DATA	2459	29	79	0	0	A_64_P003234	NM_001109048	8720.5	395.648	3.731860e+001	5.097034e+000	94	33	8.605077e+000	0	0	0	0	0	0	31.5507	1	1	57.5363	33.7879
DATA	2460	29	80	0	0	A_64_P097158	NM_001000875	8745.86	395.593	3.499491e+000	3.496989e+000	63	29	8.892978e+000	0	0	0	0	0	0	2.24265	0	0	65	31.1333
DATA	2461	29	81	0	0	A_64_P141814	NM_001134629	8771.22	396.149	2.679923e+002	2.702697e+001	288	30	8.927614e+000	0	0	0	0	0	0	224.666	1	1	46.1809	30.7667
DATA	2462	29	82	0	0	A_42_P463602	NM_001107592	8797.09	396.014	5.362167e+000	3.556927e+000	64	32	9.057225e+000	0	0	0	0	0	0	4.47598	1	0	46.8651	32.6333
DATA	2463	29	83	0	0	A_64_P083366	NM_001077643	8821.87	396.145	2.193587e+004	2.193590e+003	18486	30	7.386772e+000	0	0	0	0	0	0	18237.9	1	1	45.4864	30.2424
DATA	2464	29	84	0	0	A_44_P121039	NM_172008	8847.26	396.188	3.483429e+002	3.501416e+001	341	32	5.484393e+000	0	0	0	0	0	0	288.458	1	1	46.5243	31.5833
DATA	2465	29	85	66	1	DarkCorner	DarkCorner	8873.39	395.798	3.572226e+000	3.559298e+000	60	29	8.430573e+000	0	0	0	0	0	0	-0.0849676	0	0	51.4001	30.3226
DATA	2466	30	1	66	1	DarkCorner	DarkCorner	6752.47	401.931	3.103549e+000	3.092317e+000	59	30	7.816702e+000	0	0	0	0	0	0	-4.39032	0	0	48.2044	30.1702
DATA	2467	30	2	0	0	A_42_P687443	NM_020100	6777.91	402.065	2.308330e+002	2.328695e+001	283	30	7.855171e+000	0	0	0	0	0	0	220.478	1	1	65	30.6296
DATA	2468	30	3	0	0	A_42_P563382	ENSRNOT00000055321	6803.21	402.194	4.046936e+003	4.047052e+002	3894	35.5	8.746184e+000	0	0	0	0	0	0	3888.32	1	1	47.5395	33.1316
DATA	2469	30	4	0	0	A_42_P667100	NM_001013932	6828.64	402.188	2.154410e+003	2.154624e+002	2050	37	7.005696e+000	0	0	0	0	0	0	2081.58	1	1	49.5074	35.1852
DATA	2470	30	5	0	0	A_42_P553319	TC597248	6853.83	402	1.452788e+002	1.483889e+001	202	31.5	7.695353e+000	0	0	0	0	0	0	141.098	1	1	46.8651	32.5385
DATA	2471	30	6	0	0	A_64_P151358	NM_181695	6879.5	402	4.710518e+001	5.588463e+000	109	34	6.329644e+000	0	0	0	0	0	0	45.9799	1	1	54.1152	33.5758
DATA	2472	30	7	0	0	A_44_P196743	ENSRNOT00000007795	6904.46	402.27	3.003922e+000	2.993051e+000	59	32	5.175539e+000	0	0	0	0	0	0	-3.78157	0	0	44.4243	31.2
DATA	2474	30	9	0	0	A_64_P127111	NM_001106004	6955.41	402.247	1.566418e+004	1.566421e+003	15052	31	8.245092e+000	0	0	0	0	0	0	15491.7	1	1	48.5334	32.6923
DATA	2475	30	10	0	0	A_42_P470775	NM_001025126	6980.92	402.392	2.428619e+003	2.428799e+002	2436.5	35	8.892681e+000	0	0	0	0	0	0	2411.1	1	1	48.8603	34.8148
DATA	2476	30	11	0	0	A_44_P472855	NM_001000961	7006.37	402.36	1.763133e+002	1.787578e+001	238	30	7.179958e+000	0	0	0	0	0	0	175.655	1	1	48.8603	30.7273
DATA	2477	30	12	0	0	A_64_P080682	NM_001109652	7031.94	402.06	2.947477e+000	2.950854e+000	65	30.5	9.331937e+000	0	0	0	0	0	0	2.87388	0	0	46.8651	33.8667
DATA	2478	30	13	0	0	A_42_P727368	NM_001025693	7057.42	402.427	9.869452e+001	1.029461e+001	161	31	6.946842e+000	0	0	0	0	0	0	98.9373	1	1	57.5363	32.4828
DATA	2479	30	14	0	0	A_64_P034427	A_64_P034427	7082.61	401.87	5.090508e+003	5.090592e+002	5185	37	1.338127e+001	0	0	0	0	0	0	5116	1	1	46.8651	36.4615
DATA	2480	30	15	0	0	A_64_P042871	A_64_P042871	7108	402.455	7.303159e+002	7.308967e+001	794	34	8.360268e+000	0	0	0	0	0	0	735.825	1	1	65	36.4138
DATA	2481	30	16	0	0	A_64_P152617	NM_001105747	7133.42	402.427	2.917509e+000	2.912516e+000	63	31.5	8.648082e+000	0	0	0	0	0	0	1.8171	0	0	57.5363	33.2813
DATA	2482	30	17	0	0	A_44_P468879	NM_001007798	7158.58	402.427	3.039182e+001	4.201837e+000	93.5	33	7.537427e+000	0	0	0	0	0	0	30.7441	1	1	57.5363	32.7931
DATA	2483	30	18	0	0	A_44_P252976	NM_001012071	7184.42	402.427	1.756272e+002	1.780000e+001	244	33	1.096131e+001	0	0	0	0	0	0	177.959	1	1	57.5363	35.6897
DATA	2484	30	19	0	0	A_64_P014080	NM_022189	7209.58	402.427	4.076787e+000	2.921303e+000	69	31	6.507135e+000	0	0	0	0	0	0	4.13659	1	0	57.5363	30.9697
DATA	2485	30	20	0	0	A_44_P204789	NM_001025684	7235	402.455	5.790274e+002	5.797479e+001	652.5	29	6.582950e+000	0	0	0	0	0	0	588.199	1	1	55.8519	29.9091
DATA	2486	30	21	0	0	A_64_P030373	NM_001127319	7260.42	402.427	3.031214e+001	4.185897e+000	93	33	7.058377e+000	0	0	0	0	0	0	30.8201	1	1	65	33.2
DATA	2487	30	22	0	0	A_42_P558703	NM_001106810	7285.86	402.278	6.836020e+002	6.842105e+001	748	31	4.149384e+000	0	0	0	0	0	0	695.509	1	1	47.8731	31
DATA	2488	30	23	0	0	A_44_P241190	NM_001013199	7310.81	402.412	1.175697e+003	1.176051e+002	1265.5	34	8.080790e+000	0	0	0	0	0	0	1196.73	1	1	46.5243	33.7714
DATA	2489	30	24	0	0	A_42_P539095	XM_001081794	7336.5	402.5	1.050972e+003	1.051367e+002	1119	32	7.170938e+000	0	0	0	0	0	0	1070.04	1	1	57.5363	31.7879
DATA	2490	30	25	0	0	A_64_P010905	ENSRNOT00000057216	7361.89	402.5	2.067721e+002	2.087720e+001	275	31.5	1.041835e+001	0	0	0	0	0	0	210.525	1	1	56.9804	33.0278
DATA	2491	30	26	0	0	A_44_P500660	NM_001007645	7387.32	402.6	4.781101e+002	4.789788e+001	545	30.5	6.232170e+000	0	0	0	0	0	0	486.694	1	1	50.7771	29.8929
DATA	2492	30	27	0	0	A_64_P056436	A_64_P056436	7412.69	402.662	3.026428e+002	3.040143e+001	373	34.5	1.443260e+001	0	0	0	0	0	0	307.952	1	1	48.5334	37.1
DATA	2493	30	28	0	0	A_42_P773816	NM_017079	7438.01	402.528	1.425810e+002	1.454732e+001	210	32.5	7.903513e+000	0	0	0	0	0	0	144.989	1	1	48.5334	31.5
DATA	2494	30	29	0	0	A_64_P138604	NM_001009967	7463.5	402.5	6.743675e+004	6.743675e+003	68905	33	8.152017e+000	0	0	0	0	0	0	68519.2	1	1	57.5363	34.1538
DATA	2495	30	30	0	0	A_42_P705302	NM_001107361	7488.53	402.315	8.297824e+003	8.297875e+002	8212	33	7.171704e+000	0	0	0	0	0	0	8422.35	1	1	48.5334	32.3333
DATA	2496	30	31	0	0	A_64_P027259	NM_001191656	7514.42	402.427	2.820489e+004	2.820490e+003	28083	30	6.303754e+000	0	0	0	0	0	0	28593.7	1	1	57.5363	30.5417
DATA	2497	30	32	0	0	A_44_P288333	ENSRNOT00000006659	7539.67	402.5	4.438324e+002	4.447783e+001	517	30	8.578656e+000	0	0	0	0	0	0	449.336	1	1	57.5363	31.52
DATA	2498	30	33	0	0	A_42_P618217	NM_130752	7565.11	402.5	8.032541e+001	8.541281e+000	145	30	1.009884e+001	0	0	0	0	0	0	81.194	1	1	56.9804	30.8857
DATA	2499	30	34	0	0	A_64_P151587	A_64_P151587	7590.5	402.5	2.919375e+000	2.922994e+000	67	30	6.747594e+000	0	0	0	0	0	0	2.90215	0	0	65	29.5676
DATA	2500	30	35	0	0	A_42_P771107	NM_001108217	7615.89	402.5	1.099877e+003	1.100263e+002	1168.5	34	5.692978e+000	0	0	0	0	0	0	1107.72	1	1	56.9804	33.92
DATA	2501	30	36	0	0	A_42_P689013	NM_053800	7640.7	402.9	2.098983e+004	2.098985e+003	20693.5	34.5	8.737290e+000	0	0	0	0	0	0	21098.2	1	1	47.2035	36.0667
DATA	2502	30	37	0	0	A_64_P155334	NM_001100945	7666.63	402.64	2.298691e+003	2.298877e+002	2333	31	9.105070e+000	0	0	0	0	0	0	2305.19	1	1	48.8603	32.1667
DATA	2503	30	38	0	0	A_64_P049007	A_64_P049007	7691.78	402.313	3.048493e+001	4.231016e+000	92	31	7.372909e+000	0	0	0	0	0	0	30.4972	1	1	45.835	31.7143
DATA	2504	30	39	0	0	A_44_P351461	ENSRNOT00000027179	7717.5	402.5	3.725879e+001	4.747019e+000	101	31	9.644597e+000	0	0	0	0	0	0	37.1793	1	1	57.5363	32.3056
DATA	2505	30	40	0	0	A_44_P604267	NM_022933	7742.46	402.444	3.170551e+002	3.184238e+001	385	31	7.991124e+000	0	0	0	0	0	0	315.542	1	1	48.5334	32.5161
DATA	2506	30	41	0	0	A_64_P070475	XM_001061514	7768.42	402.573	5.602692e+000	3.010283e+000	68	33	8.324081e+000	0	0	0	0	0	0	5.56001	1	0	57.5363	31.9032
DATA	2507	30	42	0	0	A_64_P119963	A_64_P119963	7793.39	402.638	1.399502e+003	1.399817e+002	1446	31	6.115202e+000	0	0	0	0	0	0	1384.82	1	1	47.5395	29.9355
DATA	2508	30	43	0	0	A_42_P658562	NM_001134416	7819	402.545	3.747083e+002	3.758879e+001	425	31	8.274837e+000	0	0	0	0	0	0	369.618	1	1	55.8519	30.3704
DATA	2509	30	44	0	0	A_64_P116830	A_64_P116830	7844.42	402.573	7.743556e+001	8.299021e+000	139	35	8.226774e+000	0	0	0	0	0	0	76.1387	1	1	57.5363	33.4138
DATA	2510	30	45	0	0	A_64_P048531	ENSRNOT00000019473	7869.68	402.691	1.262394e+002	1.297436e+001	186	38	3.437467e+000	0	0	0	0	0	0	123.717	1	1	46.5243	36.7647
DATA	2511	30	46	0	0	A_64_P122716	NM_139331	7895.42	402.573	6.656959e+000	3.078388e+000	69	29.5	9.206910e+000	0	0	0	0	0	0	6.50104	1	0	57.5363	32.2143
DATA	2512	30	47	0	0	A_64_P077323	NM_201992	7920.58	402.573	1.378591e+001	3.316290e+000	77	35	9.378098e+000	0	0	0	0	0	0	13.4156	1	0	57.5363	35.2222
DATA	2513	30	48	0	0	A_42_P569711	NM_001108977	7946.12	402.6	2.716635e+002	2.733450e+001	326	34	8.573307e+000	0	0	0	0	0	0	263.396	1	1	49.1849	34.6111
DATA	2514	30	49	0	0	A_42_P474100	NM_001191820	7971.08	402.824	6.650538e+003	6.650608e+002	6141.5	33	7.980208e+000	0	0	0	0	0	0	6424.6	1	1	47.8731	33.6061
DATA	2515	30	50	0	0	A_64_P026404	A_64_P026404	7996.58	402.573	3.061387e+000	3.050307e+000	60	34	7.860470e+000	0	0	0	0	0	0	-0.823206	0	0	57.5363	33.0294
DATA	2516	30	51	0	0	A_64_P026581	ENSRNOT00000029099	8022.15	402.836	3.795165e+003	3.795288e+002	3587	35	8.344273e+000	0	0	0	0	0	0	3637.59	1	1	47.5395	35.7576
DATA	2517	30	52	0	0	A_64_P043624	NM_133565	8047.59	402.803	3.620152e+003	3.620282e+002	3490.5	35	8.672253e+000	0	0	0	0	0	0	3455.84	1	1	47.5395	34.8519
DATA	2518	30	53	0	0	A_44_P417429	NM_001011983	8072.8	402.6	4.014019e+003	4.014138e+002	3692.5	31	8.543966e+000	0	0	0	0	0	0	3816.07	1	1	49.1849	31.975
DATA	2519	30	54	0	0	A_64_P007574	ENSRNOT00000028681	8098.07	402.732	1.983874e+004	1.983876e+003	18485.5	31	9.375582e+000	0	0	0	0	0	0	18782.5	1	1	47.5395	33.6923
DATA	2520	30	55	0	0	A_42_P529690	NM_001173510	8123.67	402.75	2.773142e+004	2.773143e+003	25517.5	31.5	7.165033e+000	0	0	0	0	0	0	26142.8	1	1	47.5395	33.2188
DATA	2521	30	56	0	0	A_42_P505070	TC624062	8149	402.797	4.039981e+003	4.040102e+002	3767	30	6.850964e+000	0	0	0	1	0	0	3792.22	1	1	46.8651	30.75
DATA	2522	30	57	0	0	A_42_P504653	NM_017143	8174.5	403	5.208903e+001	6.082417e+000	110	30	6.414846e+000	0	0	0	0	0	0	48.6821	1	1	54.1152	30.6897
DATA	2523	30	58	0	0	A_64_P017891	A_64_P017891	8199.71	402.855	7.870782e+000	3.251201e+000	71	33	5.271938e+000	0	0	0	0	0	0	7.32351	1	0	46.5243	31.28
DATA	2524	30	59	0	0	A_42_P642724	NM_001107585	8225.08	402.901	5.090406e+003	5.090505e+002	4531	34.5	6.974981e+000	0	0	0	0	0	0	4715.36	1	1	46.8651	33.7083
DATA	2525	30	60	0	0	A_42_P780943	NM_001011906	8250.5	403	1.122597e+003	1.123048e+002	1082.5	35	1.857632e+001	0	0	0	0	0	0	1035.21	1	1	54.1152	40.8148
DATA	2526	30	61	0	0	A_44_P482325	NM_145669	8275.79	402.806	7.776720e+002	7.783290e+001	757	30	5.942592e+000	0	0	0	0	0	0	713.861	1	1	47.5395	29.7576
DATA	2527	30	62	0	0	A_42_P716750	NM_001024757	8300.99	402.956	2.580599e+002	2.600511e+001	300	34	7.148351e+000	0	0	0	0	0	0	235.816	1	1	46.8651	34.0323
DATA	2528	30	63	0	0	A_64_P009565	NM_001191823	8326.79	402.806	2.322895e+002	2.345206e+001	273	33	8.334920e+000	0	0	0	0	0	0	211.267	1	1	47.5395	32.2857
DATA	2529	30	64	0	0	A_42_P495969	NM_012824	8352.09	402.896	1.162863e+004	1.162868e+003	10173	31	7.467648e+000	0	0	0	0	0	0	10527.6	1	1	46.8651	30.8919
DATA	2530	30	65	0	0	A_64_P154671	ENSRNOT00000024704	8377.81	402.974	2.263027e+002	2.286350e+001	275	33	8.234605e+000	0	0	0	0	0	0	203.916	1	1	49.1849	32.3939
DATA	2531	30	66	0	0	A_44_P111337	NM_001108724	8402.95	402.907	3.217085e+003	3.217251e+002	2920	31	7.235064e+000	0	0	0	0	0	0	2885.42	1	1	46.8651	30.8846
DATA	2532	30	67	0	0	A_42_P665627	NM_023095	8428.44	402.986	7.493269e+001	8.182857e+000	130.5	31	6.231208e+000	0	0	0	0	0	0	66.8941	1	1	48.2044	30.1935
DATA	2533	30	68	0	0	A_44_P447585	NM_001166676	8454.16	402.813	8.243970e+000	3.404916e+000	72	31	5.939563e+000	0	0	0	0	0	0	7.32451	1	0	45.4864	32.1818
DATA	2534	30	69	0	0	A_42_P463754	NM_030994	8479.09	402.896	5.467799e+002	5.477861e+001	540	27	6.537124e+000	0	0	0	0	0	0	483.582	1	1	46.8651	29.3448
DATA	2535	30	70	0	0	A_42_P644717	NM_001108927	8504.5	403	3.346287e+000	3.336112e+000	63	31.5	5.976583e+000	0	0	0	0	0	0	1.00018	0	0	54.1152	30.7333
DATA	2536	30	71	0	0	A_42_P546539	NM_001135801	8530.07	402.8	8.205161e+002	8.211996e+001	777.5	28	8.393486e+000	0	0	0	0	0	0	718.912	1	1	46.8651	29.5313
DATA	2537	30	72	0	0	A_42_P818297	XM_001073988	8555.59	402.908	1.788581e+003	1.788898e+002	1617.5	28	7.304597e+000	0	0	0	0	0	0	1559.87	1	1	49.1849	29
DATA	2538	30	73	0	0	A_64_P047416	NM_001109501	8580.67	403.058	2.650353e+002	2.671828e+001	285	27	6.131172e+000	0	0	0	0	0	0	230.105	1	1	46.5243	27.4643
DATA	2539	30	74	0	0	A_43_P18389	XM_002726292	8606.33	403.086	1.178195e+001	3.594903e+000	71	29	5.718391e+000	0	0	0	0	0	0	10.1821	1	0	46.8651	29.3
DATA	2540	30	75	0	0	A_64_P044276	NM_001105946	8631.94	403.026	4.007975e+003	4.008120e+002	3416	31.5	1.017752e+001	0	0	0	0	0	0	3447.87	1	1	48.5334	33.7857
DATA	2541	30	76	0	0	A_64_P059475	ENSRNOT00000029976	8657.09	403.065	3.439603e+000	3.427155e+000	61	27.5	5.196025e+000	0	0	0	0	0	0	-1.15774	0	0	65	28.5357
DATA	2542	30	77	0	0	A_64_P005496	A_64_P005496	8682.5	403	9.125957e+000	3.561402e+000	72	28.5	8.751725e+000	0	0	0	0	0	0	7.78101	1	0	54.1152	29.7941
DATA	2544	30	79	0	0	A_42_P739860	NM_133578	8733.26	403.153	1.515911e+003	1.516309e+002	1228.5	31.5	8.628275e+000	0	0	0	1	0	0	1281.32	1	1	47.8731	32.6333
DATA	2545	30	80	0	0	A_42_P681251	NM_030844	8758.71	402.833	5.177939e+003	5.178057e+002	4341	33	9.588247e+000	0	0	0	1	0	0	4357.58	1	1	45.835	34.4688
DATA	2546	30	81	0	0	A_42_P567793	NM_001107668	8783.74	403.222	3.725330e+003	3.725495e+002	2954	31	7.990758e+000	0	0	0	0	0	0	3122.47	1	1	47.5395	31.069
DATA	2547	30	82	0	0	A_64_P041662	NM_182843	8809.47	403.308	4.628339e+002	4.641678e+001	442	32.5	1.075435e+001	0	0	0	0	0	0	386.323	1	1	50.1463	35.7857
DATA	2548	30	83	0	0	A_42_P534679	NM_001134974	8834.67	403.247	3.486465e+003	3.486644e+002	2816.5	31	7.172386e+000	0	0	0	0	0	0	2898.4	1	1	48.2044	30.9643
DATA	2549	30	84	66	1	DarkCorner	DarkCorner	8859.8	403.853	3.556841e+000	3.543968e+000	56	32	8.139111e+000	0	0	0	0	0	0	-4.08044	0	0	48.5334	30.8293
DATA	2550	30	85	66	1	DarkCorner	DarkCorner	8885.89	403.418	3.571452e+000	3.558527e+000	57	27	7.434502e+000	0	0	0	0	0	0	-2.92857	0	0	50.1463	27.2861
DATA	2551	31	1	66	1	DarkCorner	DarkCorner	6739.61	409.554	5.431451e+000	3.144018e+000	67.5	27	7.290171e+000	0	0	0	0	0	0	5.14803	1	0	49.1849	27.5571
DATA	2552	31	2	0	0	A_42_P576549	NM_001106490	6765.42	409.427	1.488602e+001	3.418086e+000	81	33	8.242682e+000	0	0	0	0	0	0	14.2002	1	0	57.5363	32.6429
DATA	2553	31	3	0	0	A_42_P542638	NM_001012202	6790.33	409.671	8.446537e+002	8.452073e+001	896.5	35	8.527267e+000	0	0	0	0	0	0	810.565	1	1	48.2044	33
DATA	2554	31	4	0	0	A_42_P765736	NM_001025670	6816	409.455	3.439766e+001	4.591343e+000	95.5	34	8.703390e+000	0	0	0	0	0	0	33.199	1	1	55.8519	32.8438
DATA	2555	31	5	0	0	A_44_P372461	NM_001170708	6841.5	409.231	6.275277e+002	6.282563e+001	680	31	6.276145e+000	0	0	0	0	0	0	608.922	1	1	49.8279	31.84
DATA	2556	31	6	0	0	A_64_P070554	XM_001059856	6866.51	409.444	3.910368e+001	4.934416e+000	101	35	7.737687e+000	0	0	0	0	0	0	38.1368	1	1	50.4627	35.5556
DATA	2557	31	7	0	0	A_64_P030859	ENSRNOT00000045252	6892	409.302	2.245933e+004	2.245935e+003	21844.5	32	6.476783e+000	0	0	0	0	0	0	22008.9	1	1	52.3208	32.4444
DATA	2558	31	8	0	0	A_64_P079260	NM_001005546	6917.5	409.5	2.060321e+002	2.081784e+001	267	31	5.587636e+000	0	0	0	0	0	0	202.821	1	1	57.5363	30.3103
DATA	2559	31	9	0	0	A_64_P149846	A_64_P149846	6942.75	409.5	1.812003e+004	1.812005e+003	17808	32	8.816980e+000	0	0	0	0	0	0	17912.1	1	1	52.9257	32.5
DATA	2560	31	10	0	0	A_64_P120624	NM_031634	6968.42	409.427	1.472743e+001	3.303974e+000	76	30	7.990604e+000	0	0	0	0	0	0	14.6158	1	0	57.5363	31.7241
DATA	2561	31	11	0	0	A_64_P158020	NM_001008909	6993.58	409.427	9.658711e+001	1.009829e+001	159	29	8.583853e+000	0	0	0	0	0	0	96.1988	1	1	57.5363	29.8571
DATA	2562	31	12	0	0	A_64_P116606	NM_153724	7019.14	409.606	7.268772e+001	7.839715e+000	135	29	8.355074e+000	0	0	0	0	0	0	72.6415	1	1	47.5395	30.7632
DATA	2563	31	13	0	0	A_44_P532436	ENSRNOT00000006946	7044.39	409.313	1.653382e+001	3.362801e+000	81	31	6.567760e+000	0	0	0	0	0	0	16.5727	1	1	44.7812	33.2759
DATA	2564	31	14	0	0	A_64_P027545	NM_023095	7070.06	409.394	1.955006e+002	1.976692e+001	261.5	34	1.088113e+001	0	0	0	0	0	0	196.516	1	1	45.4864	35.5517
DATA	2565	31	15	0	0	A_64_P076705	NM_017088	7095.42	409.427	1.212953e+005	1.212953e+004	121953	35.5	1.196396e+001	0	0	0	0	0	0	122233	1	1	57.5363	36.8929
DATA	2566	31	16	0	0	A_44_P238642	NM_001127201	7120.44	409.521	5.486074e+003	5.486151e+002	5549	33	9.542767e+000	0	0	0	0	0	0	5540.9	1	1	48.2044	35.4242
DATA	2567	31	17	0	0	A_64_P037249	NM_001105802	7146.12	409.753	1.077247e+002	1.115602e+001	172	30.5	6.010573e+000	0	0	0	0	0	0	109.026	1	1	49.5074	31.1429
DATA	2568	31	18	0	0	A_64_P061524	NM_172064	7171.33	409.854	3.469082e+002	3.481141e+001	407.5	34	1.254859e+001	0	0	0	0	0	0	351.716	1	1	50.7771	36.3429
DATA	2569	31	19	0	0	A_42_P536564	NM_001008344	7196.63	410	5.364317e+003	5.364395e+002	5363	32	9.454946e+000	0	0	0	0	0	0	5446.93	1	1	48.5334	34.3704
DATA	2570	31	20	0	0	A_64_P062433	NM_001135804	7222	410.226	6.128103e+002	6.134899e+001	691	31	6.099882e+000	0	0	0	0	0	0	623.055	1	1	45.4864	30.9412
DATA	2571	31	21	0	0	A_42_P665509	NM_053777	7247.58	409.573	5.863429e+004	5.863430e+003	59480.5	33	6.521715e+000	0	0	0	0	0	0	59668.5	1	1	57.5363	33.0741
DATA	2572	31	22	0	0	A_44_P250144	NM_001001373	7273.11	409.5	2.892517e+000	2.896219e+000	66	33	6.635195e+000	0	0	0	0	0	0	2.91413	0	0	65	31.6774
DATA	2573	31	23	0	0	A_42_P746838	NM_001024286	7298.04	409.432	2.830492e+001	4.038448e+000	91	32.5	6.875598e+000	0	0	0	0	0	0	28.8418	1	1	48.8603	31.0769
DATA	2574	31	24	0	0	A_44_P210852	NM_001034187	7323.7	409.563	8.955575e+001	9.407114e+000	154	32	6.649076e+000	0	0	0	0	0	0	91.2869	1	1	45.1352	30.8919
DATA	2575	31	25	0	0	A_64_P019390	A_64_P019390	7349.42	409.573	2.815667e+001	4.027110e+000	94	32	9.951979e+000	0	0	0	0	0	0	28.7041	1	1	57.5363	33.5588
DATA	2576	31	26	0	0	A_64_P134709	NM_001105760	7374.71	410.219	1.056623e+002	1.095148e+001	168	31	7.870932e+000	0	0	0	0	0	0	107.717	1	1	47.8731	30.4815
DATA	2578	31	28	0	0	A_64_P028117	NM_001000372	7425.42	409.573	4.096064e+001	5.008303e+000	101.5	34.5	1.158419e+001	0	0	0	0	0	0	41.7175	1	1	57.5363	35.75
DATA	2579	31	29	0	0	A_44_P391517	NM_001034144	7450.91	409.519	5.065871e+002	5.074073e+001	588	33	9.428497e+000	0	0	0	0	0	0	515.568	1	1	50.1463	33
DATA	2580	31	30	0	0	A_42_P743682	NM_133599	7476.42	409.573	4.985700e+001	5.761079e+000	115	35.5	9.463794e+000	0	0	0	0	0	0	50.6945	1	1	57.5363	36.4583
DATA	2581	31	31	0	0	A_64_P163075	NM_001109321	7501.58	409.573	2.138611e+001	3.595115e+000	88	31	6.438111e+000	0	0	0	0	0	0	21.7214	1	1	57.5363	31.6667
DATA	2582	31	32	0	0	A_44_P393422	NM_001013188	7527	409.545	1.266931e+003	1.267262e+002	1338	31	9.185335e+000	0	0	0	0	0	0	1285.12	1	1	55.8519	32.7037
DATA	2583	31	33	0	0	A_44_P288982	NM_001107913	7552.46	410.183	9.780901e+001	1.020108e+001	158.5	29.5	8.489683e+000	0	0	0	0	0	0	99.0772	1	1	47.5395	30.1667
DATA	2584	31	34	0	0	A_64_P009788	NM_001191099	7577.93	410.224	1.890533e+001	3.463794e+000	79.5	28	8.415971e+000	0	0	0	0	0	0	19.1189	1	1	45.835	28.6286
DATA	2585	31	35	0	0	A_42_P764228	NM_031707	7602.83	410.323	6.193020e+003	6.193088e+002	6266	30	6.633250e+000	0	0	0	0	0	0	6251.88	1	1	45.4864	31
DATA	2586	31	36	0	0	A_64_P161621	NM_001101015	7628.5	409.648	4.186888e+002	4.197015e+001	493	34	4.576966e+000	0	0	0	0	0	0	421.77	1	1	57.5363	35.3043
DATA	2587	31	37	0	0	A_42_P763522	NM_001013980	7653.57	409.689	5.120159e+003	5.120242e+002	5068	33.5	8.364736e+000	0	0	0	0	0	0	5146.94	1	1	48.5334	32.9706
DATA	2588	31	38	0	0	A_64_P029935	NM_001109299	7679.29	410.167	6.100784e+002	6.107799e+001	685.5	29.5	6.630118e+000	0	0	0	0	0	0	611.888	1	1	45.835	31.0385
DATA	2589	31	39	0	0	A_64_P045053	A_64_P045053	7704.66	409.794	2.338540e+002	2.356871e+001	295	30	4.923526e+000	0	0	0	0	0	0	233.957	1	1	46.5243	31.1739
DATA	2590	31	40	0	0	A_42_P540920	NM_001135045	7729.71	410.116	5.573146e+003	5.573223e+002	5699.5	31	6.416377e+000	0	0	0	0	0	0	5561.59	1	1	46.1809	30.3548
DATA	2591	31	41	0	0	A_64_P055323	NM_001191930	7755.25	410	4.994622e+002	5.003323e+001	559	31	6.986358e+000	0	0	0	0	0	0	497.041	1	1	49.1849	31.4667
DATA	2592	31	42	0	0	A_64_P047162	NM_153472	7780.94	410.313	6.879542e+003	6.879606e+002	6973	33	6.077496e+000	0	0	0	0	0	0	6826.62	1	1	45.835	31.3103
DATA	2593	31	43	0	0	A_64_P279594	NM_001170476	7806.5	410	1.075763e+001	3.156067e+000	72	31	5.956380e+000	0	0	0	0	0	0	10.6419	1	0	54.1152	30.0385
DATA	2594	31	44	0	0	A_42_P665509	NM_053777	7831.5	410	5.931512e+004	5.931513e+003	58092.5	31	8.642318e+000	0	0	0	0	0	0	58495.7	1	1	54.1152	33
DATA	2595	31	45	0	0	A_64_P106638	NM_001108198	7857.39	409.931	1.112574e+002	1.151953e+001	171	29.5	7.547287e+000	0	0	0	0	0	0	109.354	1	1	65	31.1923
DATA	2596	31	46	0	0	A_64_P141245	NM_001105920	7882.23	409.913	2.020967e+003	2.021189e+002	1982.5	33	1.089658e+001	0	0	0	0	0	0	1979.83	1	1	46.5243	33.9286
DATA	2597	31	47	0	0	A_42_P503739	FQ231471	7907.77	409.884	2.100407e+004	2.100409e+003	20186	34	9.887670e+000	0	0	0	0	0	0	20504.3	1	1	46.5243	33.1379
DATA	2598	31	48	0	0	A_44_P282433	NM_033230	7933	410	5.159660e+002	5.168476e+001	552	34.5	7.824869e+000	0	0	0	0	0	0	501.9	1	1	46.8651	35.1667
DATA	2599	31	49	0	0	A_42_P585750	NM_001202463	7958.5	410	8.056483e+000	3.133970e+000	71	32	7.663993e+000	0	0	0	0	0	0	7.80778	1	0	54.1152	33.5667
DATA	2600	31	50	0	0	A_42_P523517	FQ229104	7983.77	410.116	7.970095e+003	7.970153e+002	7431	33	8.174874e+000	0	0	0	0	0	0	7695.08	1	1	46.5243	33.3714
DATA	2601	31	51	0	0	A_64_P126190	NM_001113789	8009.5	410	2.787875e+001	4.133727e+000	91	35	6.902336e+000	0	0	0	0	0	0	26.8103	1	1	54.1152	34.0789
DATA	2602	31	52	0	0	A_42_P549675	NM_080577	8034.34	410.189	5.123490e+003	5.123582e+002	4685	34	1.702487e+001	0	0	0	0	0	0	4908.19	1	1	48.2044	38.6154
DATA	2603	31	53	0	0	A_42_P535644	NM_024400	8060.06	409.884	3.860703e+002	3.872943e+001	424	31	9.333249e+000	0	0	0	0	0	0	368.308	1	1	46.8651	31.8421
DATA	2604	31	54	0	0	A_64_P050233	XM_345239	8086.06	409.882	2.694559e+002	2.712216e+001	319.5	30	4.643223e+000	0	0	0	0	0	0	255.973	1	1	46.8651	30.3214
DATA	2605	31	55	0	0	A_64_P121575	NM_001013144	8111	410	5.536511e+001	6.346519e+000	114.5	31	9.419266e+000	0	0	0	0	0	0	52.3791	1	1	54.9904	32.5484
DATA	2606	31	56	0	0	A_64_P018263	NM_012728	8136.36	410.072	3.149345e+002	3.164719e+001	356	32	6.457026e+000	0	0	0	0	0	0	296.685	1	1	46.5243	31.5455
DATA	2607	31	57	0	0	A_64_P164682	TC600307	8161.93	410.2	2.275259e+004	2.275261e+003	21198	32	6.095653e+000	0	0	0	0	0	0	21341.4	1	1	46.8651	31.9032
DATA	2608	31	58	0	0	A_44_P1045612	NM_172317	8187.21	410.194	5.467980e+002	5.477006e+001	569	32.5	6.713133e+000	0	0	0	0	0	0	510.649	1	1	47.5395	31.1154
DATA	2609	31	59	0	0	A_42_P529514	NM_001008308	8212.43	410.157	6.649215e+002	6.656705e+001	665.5	31	5.571089e+000	0	0	0	0	0	0	618.227	1	1	47.5395	30.037
DATA	2610	31	60	0	0	A_44_P870348	NM_001107522	8238.13	410.24	8.731548e+002	8.737305e+001	851.5	31.5	1.523469e+001	0	0	0	0	0	0	808.175	1	1	47.8731	37.9688
DATA	2611	31	61	0	0	A_64_P108264	XM_223835	8263	410	1.025351e+002	1.073690e+001	156.5	30	6.165461e+000	0	0	0	0	0	0	94.4804	1	1	46.8651	30.2903
DATA	2612	31	62	0	0	A_42_P754784	CB328432	8288.7	410.1	7.466803e+003	7.466871e+002	6698	32	6.597654e+000	0	0	0	0	0	0	6848.72	1	1	47.2035	30.9355
DATA	2613	31	63	0	0	A_64_P084525	NM_001101001	8313.84	410.103	2.357719e+003	2.357938e+002	2131.5	33	8.526336e+000	0	0	0	0	0	0	2152.76	1	1	46.5243	32.4286
DATA	2614	31	64	0	0	A_64_P378583	NM_001099516	8339.5	410.352	3.241184e+000	3.242513e+000	64.5	32	7.733609e+000	0	0	0	0	0	0	2.64225	0	0	65	31.6061
DATA	2615	31	65	0	0	A_64_P154172	NM_001000557	8365	410.455	3.256219e+000	3.244434e+000	57	32.5	6.950342e+000	0	0	0	0	0	0	-4.36917	0	0	55.8519	31.2632
DATA	2616	31	66	0	0	A_64_P074634	NM_001024287	8390.34	410.125	1.326234e+002	1.365707e+001	184	35	9.661895e+000	0	0	0	0	0	0	119.417	1	1	45.1352	34.069
DATA	2617	31	67	1028	1	(+)E1A_r60_a22	E1A_r60_a22	8415.7	410.237	1.492482e+002	1.527989e+001	193	31	8.129055e+000	0	0	0	0	0	0	133.767	1	1	49.5074	30.8077
DATA	2618	31	68	0	0	A_43_P12780	NM_053350	8440.91	410.215	9.060640e+001	9.639480e+000	142	32	5.963904e+000	0	0	0	0	0	0	80.8328	1	1	45.835	32.1026
DATA	2619	31	69	0	0	A_44_P442169	NM_001013034	8466.79	409.955	4.899604e+003	4.899715e+002	4329	29.5	6.790574e+000	0	0	0	0	0	0	4350.14	1	1	46.1809	30.7813
DATA	2620	31	70	0	0	A_64_P093894	A_64_P093894	8492	410.455	3.880380e+001	5.107354e+000	99	27	6.090231e+000	0	0	0	0	0	0	34.2975	1	1	55.8519	27
DATA	2621	31	71	0	0	A_64_P073378	NM_001025287	8517.3	410.1	1.334738e+003	1.335155e+002	1162	31	6.086474e+000	0	0	0	0	0	0	1174.2	1	1	47.2035	29.6129
DATA	2622	31	72	0	0	A_64_P096076	A_64_P096076	8542.58	410.427	3.363744e+000	3.351571e+000	55	26	7.605693e+000	0	0	0	0	0	0	-7.90589	0	0	57.5363	28.0714
DATA	2623	31	73	0	0	A_42_P471835	TC610276	8567.99	410.384	3.549643e+003	3.549802e+002	3121	28	7.002417e+000	0	0	0	0	0	0	3094.32	1	1	48.8603	28.9231
DATA	2624	31	74	0	0	A_42_P767737	AY724480	8593.51	410.573	4.899866e+003	4.899983e+002	4188	29.5	6.403291e+000	0	0	0	0	0	0	4251.99	1	1	49.1849	28.6053
DATA	2625	31	75	0	0	A_64_P016393	A_64_P016393	8619	410.5	4.140224e+003	4.140363e+002	3593.5	32	8.388705e+000	0	0	0	0	0	0	3576.41	1	1	51.0895	31.7037
DATA	2626	31	76	0	0	A_42_P803752	XM_580093	8644.15	410.468	1.627731e+001	3.781327e+000	77.5	30	7.226594e+000	0	0	0	0	0	0	13.9981	1	0	43.7019	30.9032
DATA	2627	31	77	0	0	A_42_P589025	NM_134363	8669.58	410.427	7.502056e+004	7.502057e+003	64382	27	6.015402e+000	0	0	0	0	0	0	64228.5	1	1	57.5363	27.7667
DATA	2628	31	78	0	0	A_64_P107938	NM_001000930	8695.25	410.828	5.579600e+000	3.488180e+000	67	32	1.018775e+001	0	0	0	0	0	0	4.75623	1	0	45.1352	33.375
DATA	2629	31	79	0	0	A_64_P088817	A_64_P088817	8720.43	410.687	4.254042e+002	4.268076e+001	437	33.5	7.783785e+000	0	0	0	0	0	0	361.057	1	1	46.1809	34.0714
DATA	2630	31	80	0	0	A_64_P000579	A_64_P000579	8745.92	410.493	2.631122e+004	2.631124e+003	21912.5	32	9.683044e+000	0	0	0	0	0	0	22234.4	1	1	45.835	33.6571
DATA	2631	31	81	0	0	A_44_P570046	TC630334	8771.42	410.427	3.279220e+002	3.297720e+001	335	30.5	9.850945e+000	0	0	0	0	0	0	275.936	1	1	57.5363	31.2273
DATA	2632	31	82	0	0	A_44_P431629	NM_001106835	8796.58	410.805	1.025915e+002	1.084044e+001	145.5	32	6.711643e+000	0	0	0	0	0	0	85.9822	1	1	50.1463	32.6154
DATA	2634	31	84	0	0	A_42_P485932	NM_001034927	8847.45	410.605	1.379321e+004	1.379326e+003	11060.5	32	6.883084e+000	0	0	0	1	0	0	11466.6	1	1	49.8279	31.6552
DATA	2635	31	85	66	1	DarkCorner	DarkCorner	8872.67	410.5	3.557375e+000	3.544501e+000	55	31	8.806350e+000	0	0	0	0	0	0	-4.34395	0	0	57.5363	31.2727
DATA	2636	32	1	66	1	DarkCorner	DarkCorner	6752.77	416.726	3.092391e+000	3.081200e+000	59	29	8.120244e+000	0	0	0	0	0	0	-2.96912	0	0	48.2044	28.98
DATA	2637	32	2	0	0	A_64_P048366	ENSRNOT00000059330	6778	417.066	1.863693e+003	1.863944e+002	1854	35	6.063764e+000	0	0	0	0	0	0	1786.39	1	1	44.0646	33.3333
DATA	2638	32	3	0	0	A_44_P1058980	NM_001012036	6803.02	417.172	3.561579e+003	3.561709e+002	3501	33.5	8.925317e+000	0	0	0	0	0	0	3433.62	1	1	45.4864	32.125
DATA	2639	32	4	0	0	A_64_P062562	ENSRNOT00000027655	6828.5	416.875	4.483603e+001	5.410255e+000	107	31	5.641813e+000	0	0	0	0	0	0	43.4627	1	1	44.4243	31.5172
DATA	2640	32	5	0	0	A_44_P490100	ENSRNOT00000043641	6854.09	416.614	4.646089e+001	5.537101e+000	108	34	8.248543e+000	0	0	0	0	0	0	45.2725	1	1	65	33.9615
DATA	2641	32	6	0	0	A_42_P473886	NM_001165922	6879.5	416.648	4.193618e+002	4.204317e+001	474.5	33.5	7.830753e+000	0	0	0	0	0	0	410.651	1	1	57.5363	34.7
DATA	2642	32	7	0	0	A_64_P393339	ENSRNOT00000057753	6904.63	416.596	5.242565e+001	6.032208e+000	115	30.5	5.909665e+000	0	0	0	0	0	0	51.5709	1	1	57.8122	30.8
DATA	2643	32	8	0	0	A_44_P461154	NM_053819	6930.42	416.573	4.224175e+002	4.234608e+001	484	29	6.434859e+000	0	0	0	0	0	0	417.353	1	1	57.5363	30
DATA	2644	32	9	0	0	A_42_P701991	NM_001100671	6955.59	417.092	4.303434e+003	4.303535e+002	4154	30	8.165578e+000	0	0	0	0	0	0	4269.28	1	1	49.1849	31.52
DATA	2645	32	10	1028	1	(+)E1A_r60_1	E1A_r60_1	6981.09	416.935	2.958360e+000	2.953764e+000	63	33	5.910443e+000	0	0	0	0	0	0	1.89099	0	0	54.4085	32
DATA	2646	32	11	0	0	A_44_P541230	ENSRNOT00000010675	7006.09	417.104	2.474170e+003	2.474344e+002	2506	29	7.320913e+000	0	0	0	0	0	0	2472.15	1	1	46.8651	29.2188
DATA	2647	32	12	0	0	A_64_P004593	NM_001166761	7031.61	416.931	2.076078e+001	3.589562e+000	83.5	33.5	7.335930e+000	0	0	0	0	0	0	20.8095	1	1	53.8203	34.1111
DATA	2648	32	13	0	0	A_64_P018385	ENSRNOT00000063845	7057.3	416.73	1.509233e+001	3.286804e+000	76	33.5	9.365074e+000	0	0	0	0	0	0	15.1716	1	1	44.7812	34.2308
DATA	2649	32	14	0	0	A_64_P017590	NM_001000096	7082.5	417	2.922616e+000	2.912039e+000	59	36	1.086142e+001	0	0	0	0	0	0	-3.587	0	0	54.1152	35.4483
DATA	2650	32	15	0	0	A_42_P810118	XM_001075984	7107.79	416.838	7.086848e+002	7.092801e+001	751	33	8.846352e+000	0	0	0	0	0	0	715.977	1	1	46.1809	34.9643
DATA	2651	32	16	0	0	A_42_P772157	NM_017020	7133.31	416.897	1.253125e+003	1.253461e+002	1311.5	29	5.715476e+000	0	0	0	0	0	0	1268.72	1	1	45.835	29.2
DATA	2652	32	17	0	0	A_42_P542809	NM_021671	7158.44	417.027	4.955493e+002	4.963934e+001	566	31	7.693449e+000	0	0	0	0	0	0	502.654	1	1	48.5334	31.8214
DATA	2653	32	18	0	0	A_42_P645352	NM_001126371	7183.88	416.905	7.232180e+003	7.232238e+002	7372	29	8.346315e+000	0	0	0	0	0	0	7347.55	1	1	47.5395	31.7407
DATA	2654	32	19	0	0	A_64_P106933	NM_001130493	7209.49	417.014	4.355002e+001	5.223933e+000	105	34	9.884642e+000	0	0	0	0	0	0	44.3065	1	1	48.5334	35.1154
DATA	2655	32	20	0	0	A_42_P614175	NM_033237	7234.83	417.04	1.023534e+003	1.023940e+002	1089	32	6.802963e+000	0	0	0	0	0	0	1042.49	1	1	47.8731	31.9697
DATA	2656	32	21	0	0	A_64_P147190	NM_031840	7260.27	416.887	3.496075e+003	3.496194e+002	3642.5	33	9.356351e+000	0	0	0	0	0	0	3563.88	1	1	44.7812	35.1852
DATA	2657	32	22	0	0	A_43_P11268	NM_031762	7285.65	416.914	5.111055e+003	5.111136e+002	5104	35	6.673928e+000	0	0	0	0	0	0	5213.63	1	1	49.5074	34.8148
DATA	2658	32	23	0	0	A_64_P022215	A_64_P022215	7311.15	416.925	1.881294e+002	1.903153e+001	257	34	8.745778e+000	0	0	0	0	0	0	191.988	1	1	46.5243	33.3636
DATA	2659	32	24	0	0	A_64_P001080	NM_001109379	7336.82	417	1.190693e+002	1.224923e+001	184	32	8.250122e+000	0	0	0	0	0	0	121.539	1	1	47.2035	32.7419
DATA	2660	32	25	0	0	A_42_P468662	NM_001108886	7361.87	417	1.726666e+003	1.726905e+002	1851	33.5	8.998152e+000	0	0	0	0	0	0	1762.46	1	1	48.5334	34.5313
DATA	2661	32	26	0	0	A_42_P522285	NM_001044263	7386.86	417.057	5.127238e+002	5.135299e+001	589.5	27	6.269130e+000	0	0	0	0	0	0	523.247	1	1	46.8651	28.0741
DATA	2662	32	27	0	0	A_42_P478500	NM_177421	7412.5	417	1.581997e+005	1.581997e+004	160886	34	8.743661e+000	0	0	0	0	0	0	161376	1	1	54.1152	35.5806
DATA	2663	32	28	0	0	A_42_P739860	NM_133578	7437.79	417.194	1.519489e+003	1.519762e+002	1539	31	8.526569e+000	0	0	0	0	0	0	1549.08	1	1	47.5395	30.9643
DATA	2664	32	29	0	0	A_42_P708614	NM_001130505	7463.5	417	6.373189e+004	6.373190e+003	64668	33	1.079584e+001	0	0	0	0	0	0	64916.8	1	1	54.1152	33.5714
DATA	2665	32	30	0	0	A_64_P067000	NM_001108721	7488.7	416.9	6.087018e+002	6.093849e+001	680	34	7.493775e+000	0	0	0	0	0	0	619.383	1	1	47.2035	33.64
DATA	2666	32	31	0	0	A_44_P590748	NM_001109199	7514.42	417.069	9.940950e+001	1.035195e+001	163	33	7.687449e+000	0	0	0	0	0	0	101.033	1	1	48.2044	32.5926
DATA	2667	32	32	0	0	A_42_P742797	NM_001106761	7539.43	416.738	4.762611e+003	4.762699e+002	4890	25	5.009932e+000	0	0	0	0	0	0	4833.53	1	1	45.835	25.8947
DATA	2668	32	33	0	0	A_42_P761277	NM_001008297	7564.74	417.432	1.250555e+003	1.250890e+002	1314.5	31.5	1.146990e+001	0	0	0	0	0	0	1267.35	1	1	48.8603	32.6
DATA	2669	32	34	0	0	A_42_P503739	FQ231471	7590.19	417.392	2.155546e+004	2.155548e+003	21852.5	32	1.184215e+001	0	0	0	0	0	0	21806.8	1	1	49.1849	32.6452
DATA	2670	32	35	0	0	A_42_P635760	ENSRNOT00000023806	7615.57	417.392	9.725391e+003	9.725435e+002	9670.5	32.5	9.449442e+000	0	0	0	0	0	0	9820.08	1	1	49.1849	34.5333
DATA	2671	32	36	0	0	A_64_P136337	ENSRNOT00000064588	7640.79	417.26	4.324706e+003	4.324804e+002	4294	34	4.990385e+000	0	0	0	0	0	0	4357.75	1	1	48.5334	34.2414
DATA	2672	32	37	0	0	A_64_P128316	ENSRNOT00000062007	7666.73	417.114	1.797587e+001	3.428612e+000	78	33	7.693400e+000	0	0	0	0	0	0	18.0716	1	1	49.8279	33.8333
DATA	2673	32	38	0	0	A_64_P050799	A_64_P050799	7692	417.455	1.555336e+002	1.582627e+001	213	30	7.577113e+000	0	0	0	0	0	0	156.001	1	1	55.8519	31.3667
DATA	2674	32	39	0	0	A_42_P701779	NM_001108048	7717.08	417.167	2.237768e+003	2.237960e+002	2201	32	6.482261e+000	0	0	0	0	0	0	2238.79	1	1	46.8651	31.6552
DATA	2675	32	40	0	0	A_42_P604900	NM_199117	7742.84	417.118	5.546479e+003	5.546557e+002	5456	30.5	7.561244e+000	0	0	0	0	0	0	5533.93	1	1	46.5243	30
DATA	2676	32	41	0	0	A_44_P1060444	NM_001106644	7767.85	417.029	5.066760e+003	5.066846e+002	4999	30	7.510092e+000	0	0	0	0	0	0	5041.24	1	1	46.8651	30.4828
DATA	2677	32	42	0	0	A_64_P090339	NM_001000756	7793.58	417.427	4.859834e+001	5.689587e+000	110.5	31	6.724706e+000	0	0	0	0	0	0	48.2129	1	1	65	30.3103
DATA	2678	32	43	0	0	A_42_P770556	NM_033096	7818.73	417.219	8.433180e+003	8.433233e+002	8114.5	31	8.981782e+000	0	0	0	0	0	0	8340.57	1	1	48.5334	30.6207
DATA	2679	32	44	0	0	A_44_P606502	NM_001130502	7844.42	417.427	2.827434e+001	4.105896e+000	89	29	7.199164e+000	0	0	0	0	0	0	27.8746	1	1	65	30.1935
DATA	2680	32	45	0	0	A_64_P372189	NM_212516	7869.58	417.427	6.342302e+004	6.342303e+003	62135.5	31.5	9.352110e+000	0	0	0	0	0	0	62321.2	1	1	57.5363	32.625
DATA	2681	32	46	0	0	A_42_P540518	NM_199399	7895.06	417.045	3.918659e+003	3.918774e+002	3729	29	9.044052e+000	0	0	0	0	0	0	3837.1	1	1	46.8651	32.1111
DATA	2682	32	47	0	0	A_64_P158955	ENSRNOT00000020260	7920.58	417.427	2.553762e+001	3.945865e+000	89.5	34	9.548795e+000	0	0	0	0	0	0	24.919	1	1	65	33.2222
DATA	2683	32	48	0	0	A_44_P325841	NM_024130	7945.77	417.254	1.438787e+003	1.439103e+002	1416	33	8.560429e+000	0	0	0	0	0	0	1398.83	1	1	47.2035	33.5526
DATA	2684	32	49	0	0	A_64_P007743	XM_001071416	7971.22	417.425	1.517904e+002	1.547855e+001	211	33	7.989339e+000	0	0	0	0	0	0	147.028	1	1	48.8603	33.7273
DATA	2685	32	50	0	0	A_64_P136213	A_64_P136213	7996.67	417.5	3.981938e+000	3.067805e+000	67.5	33	7.409811e+000	0	0	0	0	0	0	3.84226	1	0	57.5363	33.0303
DATA	2686	32	51	0	0	A_43_P17392	NM_001191693	8022.33	417.5	2.734853e+003	2.735024e+002	2595	34	6.387993e+000	0	0	0	0	0	0	2628.48	1	1	57.5363	34.1613
DATA	2687	32	52	0	0	A_42_P708569	NM_001191837	8047.48	417.406	1.120573e+004	1.120577e+003	10722	33	1.335647e+001	0	0	0	0	0	0	10727.1	1	1	47.2035	35.6538
DATA	2688	32	53	0	0	A_64_P062068	XM_002728030	8072.89	417.5	3.501648e+002	3.515155e+001	393	31	8.385361e+000	0	0	0	0	0	0	333.846	1	1	56.9804	32.4571
DATA	2689	32	54	0	0	A_43_P20266	NM_001106416	8098.32	417.273	1.562191e+002	1.592489e+001	207	31	8.347300e+000	0	0	0	0	0	0	148.314	1	1	45.4864	33
DATA	2690	32	55	0	0	A_44_P248235	NM_001106048	8123.79	417.016	3.198985e+001	4.458005e+000	92	32	9.694844e+000	0	0	0	0	0	0	30.2411	1	1	45.4864	33.36
DATA	2691	32	56	0	0	A_64_P134717	NM_001101007	8149.33	417.5	3.479533e+000	3.137365e+000	66	32	6.344924e+000	0	0	0	0	0	0	3.27547	1	0	65	32.4839
DATA	2692	32	57	0	0	A_44_P555005	NM_001000944	8174.5	417.5	6.107269e+001	6.863294e+000	123	31	7.941169e+000	0	0	0	0	0	0	57.244	1	1	65	31.3929
DATA	2693	32	58	0	0	A_42_P832028	NM_001006978	8199.34	417.595	1.230448e+003	1.230849e+002	1172.5	33.5	7.370307e+000	0	0	0	0	0	0	1148.38	1	1	48.5334	34.6071
[truncated: 6,311,979 more chars]
