# Supplementary material for: Gene Expression in the Hippocampus in a Rat Model of Premenstrual Dysphoric Disorder After Treatment With Baixiangdan Capsules
Source: Front Psychol. 2018 Nov 13;9:2065. doi: 10.3389/fpsyg.2018.02065 (PMC6242977; doi:10.3389/fpsyg.2018.02065)
Supplement: Supplementary file 2 [file Data_Sheet_2.ZIP › Raw Data Files/15_11.txt]

TYPE	text	text	text	integer	text	float	float	text	integer	text	text	integer	integer	integer	integer	float	float	float	float	float	float	text	text	text	text	text	text	text	text	text	text	text	integer	integer	integer	text	integer	boolean
FEPARAMS	Protocol_Name	Protocol_date	Scan_ScannerName	Scan_NumChannels	Scan_Date	Scan_MicronsPerPixelX	Scan_MicronsPerPixelY	Scan_OriginalGUID	Scan_NumScanPass	Grid_Name	Grid_Date	Grid_NumSubGridRows	Grid_NumSubGridCols	Grid_NumRows	Grid_NumCols	Grid_RowSpacing	Grid_ColSpacing	Grid_OffsetX	Grid_OffsetY	Grid_NomSpotWidth	Grid_NomSpotHeight	Grid_GenomicBuild	FeatureExtractor_Barcode	FeatureExtractor_Sample	FeatureExtractor_ScanFileName	FeatureExtractor_ArrayName	FeatureExtractor_ScanFileGUID	FeatureExtractor_DesignFileName	FeatureExtractor_ExtractionTime	FeatureExtractor_UserName	FeatureExtractor_ComputerName	FeatureExtractor_Version	FeatureExtractor_IsXDRExtraction	FeatureExtractor_ColorMode	FeatureExtractor_QCReportType	DyeNorm_NormFilename	DyeNorm_NormNumProbes	Grid_IsGridFile
DATA	GE1_1100_Jul11 (Read Only)	1-Jul-2011 22:30	Agilent Technologies Scanner G2505C US10450393	1	07-11-2013 11:43:53	5	5	0fda1a09-3af3-4ae3-96a6-827545dd93b4	1	028282_D_F_20120224	24-Feb-2012 00:00	1	1	532	85	73.3235	63.5	0	36.6617	65	65	rn4:RGSCv3.4:Nov2004	1_4		M:\2013.07.11 Rat GE 1-color 4x44k(sunpeng)\\US10450393_S01.tif	US10450393_S01	0c7452c0-a0dc-41af-967f-0c73dacb8676	028282_D_F_20120224.xml	11-Jul-2013 15:20:48	admin	KCSY01	11.0.1.1	0	0	0		0	0
*
TYPE	float	float	float	integer	integer	float	float	float	integer	float	float	float	integer	float	float	integer	integer	integer	integer	integer	float	float	float	integer	float	float	float	float	float	integer	integer	float	float	float	float	float	integer	float	float	float	float	integer	float	float	float	float	float	integer	float	float	float	float	float	float	float	integer	float	integer	float	float	float	float	integer	float	float	float	float	text	float	float	float	float	float	float	float	float	float	float	float	float	float	float	float	float	float	float	float	float	float	integer	integer	integer	integer	float	integer	text	integer	text	float	float	float	integer	boolean	float	float	boolean	float	boolean	float	boolean	float	boolean	float	boolean	float	boolean	float	boolean	float	boolean	float	boolean	float	boolean	float	boolean
STATS	gDarkOffsetAverage	gDarkOffsetMedian	gDarkOffsetStdDev	gDarkOffsetNumPts	gSaturationValue	gAvgSig2BkgeQC	gAvgSig2BkgNegCtrl	gRatioSig2BkgeQC_NegCtrl	gNumSatFeat	gLocalBGInlierNetAve	gLocalBGInlierAve	gLocalBGInlierSDev	gLocalBGInlierNum	gGlobalBGInlierAve	gGlobalBGInlierSDev	gGlobalBGInlierNum	gNumFeatureNonUnifOL	gNumPopnOL	gNumNonUnifBGOL	gNumPopnBGOL	gOffsetUsed	gGlobalFeatInlierAve	gGlobalFeatInlierSDev	gGlobalFeatInlierNum	AnyColorPrcntFeatNonUnifOL	AnyColorPrcntBGNonUnifOL	AnyColorPrcntFeatPopnOL	AnyColorPrcntBGPopnOL	TotalPrcntFeatOL	gNumNegBGSubFeat	gNonCtrlNumNegFeatBGSubSig	gSpatialDetrendRMSFit	gSpatialDetrendRMSFilteredMinusFit	gSpatialDetrendSurfaceArea	gSpatialDetrendVolume	gSpatialDetrendAveFit	gNonCtrlNumSatFeat	gNonCtrl99PrcntNetSig	gNonCtrl50PrcntNetSig	gNonCtrl1PrcntNetSig	gNonCtrlMedPrcntCVBGSubSig	gCtrleQCNumSatFeat	gCtrleQC99PrcntNetSig	gCtrleQC50PrcntNetSig	gCtrleQC1PrcntNetSig	geQCMedPrcntCVBGSubSig	geQCSig2BkgLow2	gNegCtrlNumInliers	gNegCtrlAveNetSig	gNegCtrlSDevNetSig	gNegCtrlAveBGSubSig	gNegCtrlSDevBGSubSig	gAveNumPixOLLo	gAveNumPixOLHi	gPixCVofHighSignalFeat	gNumHighSignalFeat	AddErrorEstimateGreen	TotalNumFeatures	ROIHeight	ROIWidth	CentroidDiffX	CentroidDiffY	NumFoundFeat	MaxNonUnifEdges	MaxSpotNotFoundEdges	gMultDetrendRMSFit	gMultDetrendSurfaceAverage	eQCLowSigName2	eQCOneColorLogLowSignal	eQCOneColorLogLowSignalError	eQCOneColorLogHighSignal	eQCOneColorLinFitLogLowConc	eQCOneColorLinFitLogLowSignal	eQCOneColorLinFitLogHighConc	eQCOneColorLinFitLogHighSignal	eQCOneColorLinFitSlope	eQCOneColorLinFitIntercept	eQCOneColorLinFitRSQ	eQCOneColorSpikeDetectionLimit	gNonCtrl50PrcntBGSubSig	gCtrleQC50PrcntBGSubSig	gMedPrcntCVProcSignal	geQCMedPrcntCVProcSignal	gOutlierFlagger_Auto_FeatB_Term	gOutlierFlagger_Auto_FeatC_Term	gOutlierFlagger_Auto_BgndB_Term	gOutlierFlagger_Auto_BgndC_Term	OutlierFlagger_FeatChiSq	OutlierFlagger_BgndChiSq	GriddingStatus	IsGoodGrid	NumGeneNonUnifOL	TotalNumberOfReplicatedGenes	gPercentileIntensityProcessedSignal	ExtractionStatus	QCMetricResults	gNonCtrlNumWellAboveBG	ImageDepth	AFHold	gPMTVolts	GlassThickness	gDDN	GridHasBeenOptimized	gNegCtrlSpread	Metric_IsGoodGrid	Metric_IsGoodGrid_IsInRange	Metric_AnyColorPrcntFeatNonUnifOL	Metric_AnyColorPrcntFeatNonUnifOL_IsInRange	Metric_gNegCtrlAveNetSig	Metric_gNegCtrlAveNetSig_IsInRange	Metric_gNegCtrlAveBGSubSig	Metric_gNegCtrlAveBGSubSig_IsInRange	Metric_gNegCtrlSDevBGSubSig	Metric_gNegCtrlSDevBGSubSig_IsInRange	Metric_gSpatialDetrendRMSFilteredMinusFit	Metric_gSpatialDetrendRMSFilteredMinusFit_IsInRange	Metric_gNonCntrlMedCVProcSignal	Metric_gNonCntrlMedCVProcSignal_IsInRange	Metric_gE1aMedCVProcSignal	Metric_gE1aMedCVProcSignal_IsInRange	Metric_absGE1E1aSlope	Metric_absGE1E1aSlope_IsInRange	Metric_DetectionLimit	Metric_DetectionLimit_IsInRange	Metric_gDDN	Metric_gDDN_IsInRange
DATA	7.21237	7.21237	1.82218	0	778172	1.38656	1.66911	0.830715	0	31.8769	39.0893	3.14362	43348	39.0893	3.14362	43348	30	392	20	905	7.21237	3786.75	10910.4	43836	0.0677905	0.0451937	0.885796	2.04501	0.0699676	1301	533	3.50834	3.05065	1.00574	6.40572	65.156	0	55899.5	396.091	55.2466	10.9467	0	196.338	66.3038	49.121	-1	1.46647	150	51.426	4.45708	-6.42403	3.28846	0.69596	0.633954	0.128376	6192	3.05065	44254	4.40311	7.61742	0.850594	1.0972	42039	0.00588235	0.0789474	0.0917329	1.00356	(+)E1A_r60_3	0	0	0	0	0	0	0	0	0	0	-1	337.577	7.84309	3.9705	-1	1099.37	101.063	109.5	68.6809	1.94584	2.48229	0	1	24	30367	2678.82	1	ExtractionEvaluate	38044	20 Bit	0	354	978.841	-1	0	9.95495	1	1	0.0677905	1	51.426	0	-6.42403	1	3.28846	1	3.05065	1	3.9705	1	-1	0	0	0	-1	0	-1	1
*
TYPE	integer	integer	integer	integer	integer	text	text	float	float	float	float	float	float	float	boolean	boolean	boolean	boolean	boolean	boolean	float	boolean	boolean	float	float
FEATURES	FeatureNum	Row	Col	SubTypeMask	ControlType	ProbeName	SystematicName	PositionX	PositionY	gProcessedSignal	gProcessedSigError	gMedianSignal	gBGMedianSignal	gBGPixSDev	gIsSaturated	gIsFeatNonUnifOL	gIsBGNonUnifOL	gIsFeatPopnOL	gIsBGPopnOL	IsManualFlag	gBGSubSignal	gIsPosAndSignif	gIsWellAboveBG	SpotExtentX	gBGMeanSignal
DATA	1	1	1	260	1	GE_BrightCorner	GE_BrightCorner	9878.59	183.071	3.988954e+004	3.988956e+003	33428	30	8.427082e+000	0	0	0	0	0	0	34503.7	1	1	53.2255	31.3922
DATA	2	1	2	66	1	DarkCorner	DarkCorner	9904.42	183.427	3.706147e+000	3.565745e+000	71	32	8.894383e+000	0	0	0	0	0	0	3.18804	1	0	57.5363	32.7023
DATA	3	1	3	66	1	DarkCorner	DarkCorner	9929.5	183.352	3.575724e+000	3.577216e+000	74	30	7.813072e+000	0	0	0	0	0	0	2.7237	0	0	57.5363	31.2375
DATA	4	1	4	66	1	DarkCorner	DarkCorner	9954.91	183.386	3.590366e+000	3.577634e+000	64	30	7.883807e+000	0	0	0	0	0	0	-3.15255	0	0	57.259	31.217
DATA	5	1	5	66	1	DarkCorner	DarkCorner	9980.33	183.099	3.602735e+000	3.595393e+000	69	30	8.476807e+000	0	0	0	0	1	0	1.67914	0	0	50.1463	30.7452
DATA	6	1	6	66	1	DarkCorner	DarkCorner	10005.6	183.427	3.613009e+000	3.600197e+000	67	32	9.309813e+000	0	0	0	0	0	0	-1.5622	0	0	57.5363	32.8162
DATA	7	1	7	66	1	DarkCorner	DarkCorner	10031.4	183.427	3.621350e+000	3.620593e+000	71	31	8.851134e+000	0	0	0	0	0	0	2.49887	0	0	57.5363	31.992
DATA	8	1	8	66	1	DarkCorner	DarkCorner	10056.5	183.352	3.627472e+000	3.620670e+000	70	31	7.475331e+000	0	0	0	0	0	0	1.76744	0	0	57.5363	30.9608
DATA	9	1	9	66	1	DarkCorner	DarkCorner	10082	183.455	3.970417e+000	3.640660e+000	72	31	7.889557e+000	0	0	0	0	0	0	3.34693	1	0	55.8519	30.877
DATA	10	1	10	66	1	DarkCorner	DarkCorner	10107.4	183.427	8.560734e+000	3.721243e+000	75	30	8.455626e+000	0	0	0	0	0	0	7.21146	1	0	57.5363	31.1059
DATA	11	1	11	66	1	DarkCorner	DarkCorner	10132.7	183.137	3.635062e+000	3.622171e+000	66	31	8.496400e+000	0	0	0	0	0	0	-2.26129	0	0	50.1463	31.1537
DATA	12	1	12	0	0	A_64_P076162	A_64_P076162	10157.9	183.7	6.326538e+001	7.289689e+000	122	31	8.414169e+000	0	0	0	0	0	0	53.2946	1	1	47.2035	31.6481
DATA	13	1	13	0	0	A_64_P002176	NM_001170551	10183.3	183.778	5.142902e+002	5.155620e+001	501	31	8.112488e+000	0	0	0	0	0	0	433.522	1	1	47.5395	31.5833
DATA	14	1	14	0	0	A_42_P664913	NM_001108400	10208.9	183.5	8.104720e+002	8.112778e+001	731.5	31	7.551830e+000	0	0	0	1	0	0	683.928	1	1	56.9804	31.0352
DATA	15	1	15	0	0	A_43_P13320	NM_138880	10233.7	183.649	1.990954e+001	4.122645e+000	87	31	8.218453e+000	0	0	0	0	0	0	16.8246	1	1	48.5334	31.1857
DATA	16	1	16	0	0	A_64_P126523	A_64_P126523	10259.3	183.987	2.364628e+001	4.310096e+000	89	31	8.495853e+000	0	0	0	0	0	0	20.0183	1	1	49.1849	31.8809
DATA	17	1	17	0	0	A_64_P038045	XM_002730109	10285.1	183.5	4.308355e+001	5.611685e+000	104	31	8.149422e+000	0	0	0	0	0	0	36.5528	1	1	56.9804	31.5528
DATA	18	1	18	0	0	A_43_P11804	NM_017066	10310.5	183.5	1.937378e+004	1.937381e+003	16247	31	7.976747e+000	0	0	0	0	0	0	16477.2	1	1	57.5363	31.2352
DATA	19	1	19	0	0	A_44_P808710	XM_001069205	10335.7	183.908	5.199636e+001	6.311331e+000	113	30	7.783025e+000	0	0	0	0	1	0	44.3422	1	1	49.5074	30.4451
DATA	20	1	20	0	0	A_64_P142111	NM_001100887	10361.1	184.015	5.108107e+002	5.120543e+001	506	30	8.486189e+000	0	0	0	0	0	0	436.925	1	1	46.1809	31.1864
DATA	21	1	21	0	0	A_64_P095642	A_64_P095642	10386.6	184.105	1.443786e+002	1.486908e+001	196	30	8.349140e+000	0	0	0	0	1	0	123.897	1	1	42.9674	30.6653
DATA	22	1	22	0	0	A_42_P735279	NM_001004446	10412	183.545	2.435359e+004	2.435361e+003	20278.5	30.5	9.054947e+000	0	0	0	0	0	0	20971.5	1	1	55.8519	31.7784
DATA	23	1	23	0	0	A_44_P902822	XM_001063709	10437.4	183.662	4.327682e+001	5.584557e+000	106	32	8.363356e+000	0	0	0	0	0	0	37.4039	1	1	48.5334	32.1864
DATA	24	1	24	0	0	A_42_P563843	NM_022263	10462.7	183.762	5.140221e+000	3.553502e+000	74	32	8.348842e+000	0	0	0	0	0	0	4.45975	1	0	50.4627	32.3034
DATA	25	1	25	0	0	A_42_P610788	NM_031544	10488.3	183.662	7.831708e+003	7.831786e+002	6603	32	8.446828e+000	0	0	0	0	0	0	6822.45	1	1	48.5334	32.3661
DATA	26	1	26	0	0	A_44_P242429	NM_001134842	10513.5	183.944	2.962522e+003	2.962727e+002	2519	31	8.709312e+000	0	0	0	0	0	0	2591.4	1	1	48.5334	32.1243
DATA	27	1	27	0	0	A_64_P020571	NM_001031659	10539	183.545	3.513381e+002	3.530500e+001	372	31.5	8.800694e+000	0	0	0	0	0	0	308.65	1	1	55.8519	32.4466
DATA	28	1	28	0	0	A_42_P518462	NM_001007020	10564.3	183.9	7.245895e+003	7.245978e+002	6409	31	8.722587e+000	0	0	0	0	0	0	6393.36	1	1	47.2035	32.2287
DATA	29	1	29	0	0	A_42_P469751	XM_001054007	10589.8	183.913	2.143164e+003	2.143440e+002	1963	30	8.367182e+000	0	0	0	0	1	0	1899.5	1	1	46.5243	30.7524
DATA	30	1	30	0	0	A_44_P209459	NM_022387	10615	184.288	7.822956e+003	7.823031e+002	6819	32	8.563408e+000	0	0	0	0	0	0	6964.91	1	1	45.835	32.9921
DATA	31	1	31	0	0	A_64_P018547	NM_001108717	10640.3	184.38	1.106212e+003	1.106738e+002	1007	32	8.263834e+000	0	0	0	0	0	0	989.389	1	1	47.5395	32.8436
DATA	32	1	32	0	0	A_64_P111513	A_64_P111513	10665.6	184.138	2.514762e+001	4.225127e+000	92	32	8.149485e+000	0	0	0	0	0	0	22.5953	1	1	44.7812	32.2757
DATA	33	1	33	0	0	A_42_P493925	NM_198785	10691.4	184.265	5.601253e+002	5.611438e+001	567	30	7.920972e+000	0	0	0	0	1	0	505.65	1	1	46.5243	30.3788
DATA	34	1	34	0	0	A_64_P049828	NM_012543	10716.4	184.164	2.486047e+003	2.486274e+002	2240.5	31	7.808877e+000	0	0	0	0	0	0	2254.54	1	1	48.5334	31.6177
DATA	35	1	35	0	0	A_64_P137927	NM_001191885	10741.8	184.265	2.152293e+002	2.178184e+001	269	31	7.522334e+000	0	0	0	0	0	0	196.088	1	1	46.1809	31.0143
DATA	36	1	36	0	0	A_43_P19848	NM_001106018	10767.5	183.648	5.900941e+001	6.777157e+000	124.5	32	8.443364e+000	0	0	0	0	0	0	54.0109	1	1	57.5363	32.2399
DATA	37	1	37	0	0	A_44_P308673	NM_139108	10792.8	184.333	2.999082e+002	3.017379e+001	344	30.5	7.909969e+000	0	0	0	0	0	0	275.748	1	1	46.5243	31.251
DATA	38	1	38	0	0	A_64_P004269	NM_001191660	10818.1	184.426	2.418671e+003	2.418897e+002	2199	31	8.236219e+000	0	0	0	0	0	0	2233.73	1	1	46.5243	31.1026
DATA	39	1	39	0	0	A_42_P543670	NM_012572	10843.4	184.092	1.954255e+002	1.981737e+001	249.5	31	8.286116e+000	0	0	0	0	0	0	181.27	1	1	49.1849	31.4853
DATA	40	1	40	0	0	A_64_P164696	TC605704	10868.5	183.919	6.010072e+000	3.329701e+000	77	31	8.114766e+000	0	0	0	0	0	0	5.59835	1	0	48.5334	31.2887
DATA	41	1	41	0	0	A_64_P055763	NM_001191822	10894.1	184.038	1.166363e+004	1.166368e+003	10989.5	31	8.589779e+000	0	0	0	0	0	0	10910.5	1	1	49.1849	31.735
DATA	42	1	42	0	0	A_64_P068622	NM_001013056	10919.7	184.246	1.587859e+003	1.588191e+002	1554	32	9.035328e+000	0	0	0	0	0	0	1491.4	1	1	45.1352	32.7004
DATA	43	1	43	0	0	A_44_P915877	XM_001065403	10945.1	184.015	2.894707e+002	2.912731e+001	333	31	8.976687e+000	0	0	0	0	0	0	272.949	1	1	46.8651	32.3562
DATA	44	1	44	0	0	A_42_P647599	NM_024129	10970.6	184.028	6.892945e+002	6.900477e+001	712	31.5	8.994687e+000	0	0	0	0	0	0	652.406	1	1	48.2044	32.4058
DATA	45	1	45	0	0	A_42_P798776	XM_002725203	10995.8	184.084	4.895459e+003	4.895564e+002	4590	31	8.913865e+000	0	0	0	0	0	0	4650.04	1	1	49.8279	32.118
DATA	46	1	46	0	0	A_42_P781735	NM_053319	11021.5	184	8.358974e+004	8.358974e+003	80681	32	9.069132e+000	0	0	0	0	0	0	79674	1	1	54.1152	33.029
DATA	47	1	47	0	0	A_42_P553611	TC630296	11046.8	184.103	5.354560e+003	5.354655e+002	5108.5	32	8.287531e+000	0	0	0	0	0	0	5120.18	1	1	46.5243	32.4698
DATA	48	1	48	0	0	A_43_P12729	NM_032615	11072.1	184.473	5.130072e+003	5.130171e+002	4919	30	8.135087e+000	0	0	0	0	1	0	4920.33	1	1	48.8603	30.735
DATA	49	1	49	0	0	A_42_P507072	FQ213070	11097.9	184.219	4.666151e+003	4.666259e+002	4337	31	8.538786e+000	0	0	0	0	0	0	4488.15	1	1	47.5395	31.2674
DATA	50	1	50	0	0	A_42_P645467	NM_001108804	11122.9	184.386	5.160782e+001	6.053260e+000	123.5	31	8.563386e+000	0	0	0	0	0	0	49.7655	1	1	57.259	31.951
DATA	51	1	51	0	0	A_42_P738431	NM_019175	11148.4	184.254	3.226444e+003	3.226599e+002	3079	31	8.601726e+000	0	0	0	0	0	0	3118.6	1	1	47.5395	31.5631
DATA	52	1	52	0	0	A_42_P712297	NM_001135583	11173.7	184.459	5.471889e+003	5.471980e+002	5248.5	31	8.276085e+000	0	0	0	0	0	0	5300.11	1	1	51.7088	31.5626
DATA	53	1	53	0	0	A_42_P657538	NM_001008362	11199.4	184.427	3.639621e+003	3.639757e+002	3555	31	8.334571e+000	0	0	0	0	0	0	3531.96	1	1	57.5363	32
DATA	54	1	54	0	0	A_42_P515405	NM_212505	11224.5	184.614	4.102789e+002	4.114778e+001	472	31	8.437424e+000	0	0	0	0	0	0	398.766	1	1	47.5395	31.951
DATA	55	1	55	0	0	A_64_P089886	NM_053476	11249.8	184.597	3.808593e+003	3.808722e+002	3779.5	32	8.251054e+000	0	0	0	0	0	0	3706.55	1	1	47.8731	32.595
DATA	56	1	56	0	0	A_42_P528580	NM_001107528	11275.2	184.588	5.722503e+003	5.722588e+002	5716.5	31	8.406654e+000	0	0	0	0	0	0	5574.88	1	1	46.5243	31.7767
DATA	57	1	57	0	0	A_43_P14285	NM_001034145	11300.9	184.373	1.084580e+004	1.084585e+003	10610	31	8.126322e+000	0	0	0	0	0	0	10573.7	1	1	45.835	31.9981
DATA	58	1	58	0	0	A_42_P616287	NM_001134555	11325.9	184.365	2.551260e+002	2.570362e+001	321	31	8.256010e+000	0	0	0	0	0	0	248.83	1	1	49.1849	31.7769
DATA	59	1	59	0	0	A_42_P496411	NM_001109410	11351.4	184.5	5.609161e+003	5.609248e+002	5510	31	8.020878e+000	0	0	0	0	0	0	5471.42	1	1	47.8731	31.7861
DATA	60	1	60	0	0	A_44_P494310	NM_001009604	11376.8	184.552	5.724997e+003	5.725083e+002	5545	32	9.332011e+000	0	0	0	0	0	0	5583.31	1	1	52.3208	33.5268
DATA	61	1	61	0	0	A_42_P645142	NM_019375	11402.5	184.427	7.598882e+002	7.605325e+001	803	31	1.434306e+001	0	0	0	0	0	0	740.684	1	1	49.1849	33.7516
DATA	62	1	62	0	0	A_64_P042132	AABR03024196	11427.7	184.778	7.145899e+003	7.145967e+002	6493	23	6.420571e+000	0	1	0	0	1	0	6959.49	1	1	47.5395	23.9293
DATA	63	1	63	0	0	A_42_P508085	NM_001009620	11453.2	184.727	1.488002e+003	1.488332e+002	1542.5	23	6.557096e+000	0	0	0	1	1	0	1447.44	1	1	49.8279	23.3619
DATA	64	1	64	0	0	A_64_P051159	NM_001100684	11478.4	184.697	9.235260e+002	9.240600e+001	959.5	24	6.421623e+000	0	0	0	0	1	0	896.98	1	1	49.5074	24.3353
DATA	65	1	65	0	0	A_64_P124041	ENSRNOT00000019667	11503.8	184.558	1.218346e+002	1.258331e+001	196	28	1.015876e+001	0	0	0	0	1	0	118.108	1	1	49.8279	29.5355
DATA	66	1	66	0	0	A_64_P131122	XR_086302	11529.1	184.675	1.093746e+002	1.138312e+001	176	37	1.813359e+001	0	0	0	0	0	0	105.793	1	1	50.1463	41.6632
DATA	67	1	67	0	0	A_64_P021601	NM_031737	11554.5	184.57	1.884744e+002	1.911087e+001	256	33	1.135315e+001	0	0	0	0	0	0	181.827	1	1	50.4627	34.2892
DATA	68	1	68	0	0	A_44_P776423	NM_001017386	11579.8	184.775	1.257502e+004	1.257506e+003	12062	31	1.037260e+001	0	0	0	0	0	0	12095.8	1	1	47.2035	32.247
DATA	69	1	69	0	0	A_64_P120445	NM_080694	11605.5	184.5	8.886333e+001	9.438971e+000	150	34	1.167619e+001	0	0	0	0	0	0	85.1863	1	1	57.5363	35.751
DATA	70	1	70	0	0	A_42_P772878	NM_001011936	11630.8	184.671	3.071530e+003	3.071696e+002	2959	33	8.752119e+000	0	0	0	0	0	0	2933.6	1	1	48.2044	33.1744
DATA	71	1	71	0	0	A_42_P736315	NM_001108321	11656.1	184.648	1.533338e+003	1.533674e+002	1566	33	8.601454e+000	0	0	0	0	0	0	1458.5	1	1	47.8731	33.657
DATA	73	1	73	0	0	A_64_P041004	NM_001108599	11706.9	184.724	2.422188e+004	2.422190e+003	22213	32	8.087779e+000	0	0	0	0	0	0	22825.3	1	1	53.2255	32.5961
DATA	74	1	74	0	0	A_42_P494276	NM_001109663	11732.2	184.853	7.966845e+002	7.973489e+001	822	31	7.751157e+000	0	0	0	0	0	0	746.839	1	1	46.1809	31.3946
DATA	75	1	75	66	1	DarkCorner	DarkCorner	11757.6	184.573	3.284378e+000	3.272731e+000	74	32	8.540364e+000	0	0	0	0	0	0	-0.613727	0	0	57.5363	32.2567
DATA	76	1	76	66	1	DarkCorner	DarkCorner	11783	185.027	3.304124e+000	3.294174e+000	75	33	8.650569e+000	0	0	0	0	0	0	0.999629	0	0	46.8651	33.1167
DATA	77	1	77	66	1	DarkCorner	DarkCorner	11808.4	184.819	3.325501e+000	3.313708e+000	74.5	32	8.205197e+000	0	0	0	0	0	0	-1.01224	0	0	51.4001	32.9216
DATA	78	1	78	66	1	DarkCorner	DarkCorner	11834	184.545	3.348587e+000	3.346806e+000	78	33.5	8.573745e+000	0	0	0	0	0	0	2.37466	0	0	55.8519	33.6533
DATA	79	1	79	66	1	DarkCorner	DarkCorner	11859.4	184.573	3.372886e+000	3.362453e+000	75.5	33	8.838555e+000	0	0	0	0	0	0	0.919821	0	0	57.5363	33.2865
DATA	80	1	80	66	1	DarkCorner	DarkCorner	11884.3	185.2	3.397926e+000	3.390363e+000	76	32	8.224436e+000	0	0	0	0	0	0	1.57107	0	0	48.8603	32.3681
DATA	81	1	81	66	1	DarkCorner	DarkCorner	11910.4	185	3.426074e+000	3.422293e+000	75	31	7.760657e+000	0	0	0	0	0	0	2.1373	0	0	49.1849	32.0315
DATA	82	1	82	66	1	DarkCorner	DarkCorner	11935.4	184.68	6.271681e+000	3.499154e+000	78.5	31	7.803326e+000	0	0	0	0	0	0	5.55782	1	0	48.8603	31.433
DATA	83	1	83	66	1	DarkCorner	DarkCorner	11960.9	184.614	3.485520e+000	3.477366e+000	77	31	7.757719e+000	0	0	0	0	0	0	1.50177	0	0	57.259	31.7212
DATA	84	1	84	260	1	GE_BrightCorner	GE_BrightCorner	11986.5	184.648	4.390021e+004	4.390022e+003	38040.5	31	8.405075e+000	0	0	0	0	0	0	38203.7	1	1	57.5363	32.2544
DATA	85	1	85	260	1	GE_BrightCorner	GE_BrightCorner	12011.5	185	4.078249e+004	4.078251e+003	35273	32	8.752805e+000	0	0	0	0	0	0	35158.5	1	1	54.1152	33.0661
DATA	86	2	1	260	1	GE_BrightCorner	GE_BrightCorner	9891.44	190.517	4.273330e+004	4.273331e+003	35999.5	34	9.559751e+000	0	0	0	0	0	0	36841.4	1	1	52.9257	34.3616
DATA	87	2	2	66	1	DarkCorner	DarkCorner	9916.67	190.5	3.568984e+000	3.556328e+000	64	29	8.152514e+000	0	0	0	0	1	0	-5.96114	0	0	57.5363	30.5485
DATA	88	2	3	66	1	DarkCorner	DarkCorner	9942.33	190.5	3.584814e+000	3.572102e+000	66	32	8.003138e+000	0	0	0	0	0	0	-3.10038	0	0	57.5363	32.7317
DATA	89	2	4	66	1	DarkCorner	DarkCorner	9967.3	190.882	3.598080e+000	3.585321e+000	65	32	8.838815e+000	0	0	0	0	0	0	-3.15286	0	0	49.1849	32.3301
DATA	90	2	5	66	1	DarkCorner	DarkCorner	9993.42	190.517	3.609572e+000	3.596772e+000	65	31	8.541269e+000	0	0	0	0	0	0	-3.22534	0	0	52.9257	31.4806
DATA	91	2	6	66	1	DarkCorner	DarkCorner	10018.5	190.5	3.618575e+000	3.605742e+000	69	34	9.920884e+000	0	0	0	0	0	0	-0.266389	0	0	57.5363	35.1626
DATA	92	2	7	66	1	DarkCorner	DarkCorner	10043.7	190.973	3.625701e+000	3.612844e+000	67	31	8.326762e+000	0	0	0	0	0	0	-3.61811	0	0	48.8603	31.7604
DATA	93	2	8	66	1	DarkCorner	DarkCorner	10068.4	191.017	3.630783e+000	3.617907e+000	66	31	8.176556e+000	0	0	0	0	0	0	-5.1115	0	0	43.7019	31.4343
DATA	94	2	9	66	1	DarkCorner	DarkCorner	10094.4	190.544	3.634159e+000	3.621272e+000	67	32	7.870616e+000	0	0	0	0	0	0	-1.16219	0	0	50.4627	31.9242
DATA	95	2	10	66	1	DarkCorner	DarkCorner	10120	190.545	3.635741e+000	3.622848e+000	68	31	9.225492e+000	0	0	0	0	0	0	-0.411409	0	0	65	31.9286
DATA	96	2	11	0	0	A_44_P212746	ENSRNOT00000049707	10145.4	190.573	1.764284e+001	4.029501e+000	83	33	8.229449e+000	0	0	0	0	0	0	14.8568	1	0	57.5363	32.7108
DATA	97	2	12	0	0	A_64_P103615	NM_001107179	10170.7	191.106	7.792022e+001	8.592313e+000	134	32	8.452530e+000	0	0	0	0	0	0	65.6455	1	1	45.835	32.9436
DATA	98	2	13	0	0	A_44_P550697	NM_001106400	10196.3	191.242	2.820563e+002	2.843671e+001	304	31	7.872040e+000	0	0	0	0	0	0	237.835	1	1	45.4864	31.2268
DATA	99	2	14	0	0	A_64_P045429	A_64_P045429	10221.3	191.357	7.988446e+001	8.767639e+000	138	32	7.245409e+000	0	0	0	0	0	0	67.4445	1	1	46.8651	31.7302
DATA	100	2	15	0	0	A_64_P075175	ENSRNOT00000044322	10246.8	191.443	2.169202e+002	2.198993e+001	251	32	8.222430e+000	0	0	0	0	0	0	183.442	1	1	46.5243	32.5076
DATA	101	2	16	0	0	A_44_P472801	NM_173121	10272.3	191.284	2.650160e+003	2.650405e+002	2304.5	32	8.130330e+000	0	0	0	0	0	0	2245.63	1	1	46.1809	32.4657
DATA	102	2	17	0	0	A_42_P491486	NM_022533	10297.6	191.265	6.587969e+003	6.588067e+002	5478	32	8.676998e+000	0	0	0	0	0	0	5595.2	1	1	46.5243	32.1508
DATA	103	2	18	0	0	A_43_P12736	NM_033299	10323	191.277	1.201674e+002	1.253942e+001	173	31	7.575298e+000	0	0	0	0	0	0	102.325	1	1	45.4864	30.8205
DATA	104	2	19	0	0	A_64_P158790	A_64_P158790	10348.5	190.648	3.654883e+004	3.654885e+003	31258	31	8.633238e+000	0	0	0	0	0	0	31212.2	1	1	57.5363	31.436
DATA	105	2	20	0	0	A_44_P229481	NM_001191077	10373.6	191.265	2.816468e+002	2.838893e+001	310	31	8.359634e+000	0	0	0	0	0	0	241.268	1	1	46.5243	31.524
DATA	106	2	21	0	0	A_64_P133836	ENSRNOT00000039319	10399.4	190.573	1.614946e+001	3.899191e+000	82.5	30	8.882961e+000	0	0	0	0	0	0	13.8816	1	0	65	31.5409
DATA	107	2	22	0	0	A_43_P13137	NM_130818	10424.6	190.573	3.175487e+001	4.752927e+000	100	32	8.395971e+000	0	0	0	0	0	0	27.3926	1	1	57.5363	32.743
DATA	108	2	23	0	0	A_42_P586141	NM_017035	10450	191.426	3.587085e+002	3.604346e+001	378	33	8.582352e+000	0	0	0	0	0	0	310.601	1	1	45.4864	32.7902
DATA	109	2	24	0	0	A_44_P142850	NM_001106975	10475.3	191.197	7.199272e+001	8.009065e+000	129.5	32	7.843720e+000	0	0	0	0	0	0	62.5826	1	1	45.835	32.4272
DATA	110	2	25	0	0	A_44_P1042504	NM_001044232	10500.8	191.095	1.956467e+002	1.987438e+001	239	32	8.369219e+000	0	0	0	0	0	0	170.776	1	1	45.4864	31.92
DATA	111	2	26	0	0	A_42_P476474	NM_001033926	10526.2	191.089	4.860413e+003	4.860537e+002	4134	33	8.869698e+000	0	0	0	0	0	0	4260.54	1	1	49.1849	32.9951
DATA	112	2	27	0	0	A_44_P480882	ENSRNOT00000035496	10551.3	191.083	2.263178e+001	4.138875e+000	90	31	8.517690e+000	0	0	0	0	0	0	19.9237	1	1	47.8731	32.3582
DATA	113	2	28	0	0	A_44_P1042696	NM_001106377	10576.9	191.063	8.794128e+003	8.794195e+002	7677	31	8.835969e+000	0	0	0	0	0	0	7776.65	1	1	49.5074	31.5735
DATA	114	2	29	0	0	A_64_P132576	NM_001012357	10602.2	191.141	3.193178e+002	3.211594e+001	353.5	30	7.971189e+000	0	0	0	0	0	0	283.642	1	1	46.8651	31.2816
DATA	115	2	30	0	0	A_42_P652357	NM_021868	10627.5	191	3.598773e+004	3.598775e+003	30843.5	34	9.527253e+000	0	0	0	0	0	0	32113	1	1	54.1152	34.9679
DATA	116	2	31	0	0	A_64_P134935	NM_001107976	10653.1	191.443	1.379745e+001	3.671935e+000	81	34	7.740208e+000	0	0	0	0	0	0	12.3694	1	0	46.5243	33.0735
DATA	117	2	32	0	0	A_64_P034019	NM_001107145	10678.6	191.423	5.394596e+001	6.369783e+000	119	31	8.880524e+000	0	0	0	0	0	0	48.5874	1	1	47.2035	31.9807
DATA	118	2	33	0	0	A_64_P140634	A_64_P140634	10704	191.189	3.572242e+003	3.572402e+002	3171	31	7.858515e+000	0	0	0	0	0	0	3232.4	1	1	47.5395	31.5075
DATA	120	2	35	0	0	A_42_P746029	NM_144748	10754.4	191.2	3.701197e+001	4.985848e+000	103.5	32	9.612723e+000	0	0	0	0	0	0	33.7992	1	1	49.1849	33.5459
DATA	121	2	36	0	0	A_64_P009032	NM_001105801	10780.4	191.427	4.583822e+004	4.583823e+003	40801.5	33	8.738766e+000	0	0	0	0	0	0	42055.1	1	1	57.5363	33.4589
DATA	122	2	37	0	0	A_42_P764792	NM_001014036	10805.5	191.5	3.978437e+002	3.992185e+001	430.5	31	8.170956e+000	0	0	0	0	0	0	366.635	1	1	49.1849	31.5308
DATA	123	2	38	0	0	A_64_P029278	NM_001108687	10831	191.455	4.117413e+002	4.130581e+001	449	32	9.074176e+000	0	0	0	0	0	0	381.133	1	1	55.8519	32.3627
DATA	124	2	39	0	0	A_43_P12266	NM_022622	10855.9	191.768	5.812392e+001	6.674806e+000	125	32	9.170147e+000	0	0	0	0	0	0	54.0328	1	1	46.5243	32.7282
DATA	125	2	40	0	0	A_44_P204710	ENSRNOT00000049315	10881.4	191.646	2.476895e+001	4.100357e+000	95	31	7.966246e+000	0	0	0	0	0	0	23.1237	1	1	45.1352	31.5407
DATA	126	2	41	0	0	A_64_P163837	NM_001013149	10907.1	191.384	1.750225e+002	1.780220e+001	235	33	9.197392e+000	0	0	0	0	0	0	164.079	1	1	48.5334	33.7427
DATA	127	2	42	0	0	A_64_P016202	XM_001080153	10932.6	191.427	3.252682e+000	3.251444e+000	72.5	33	9.153498e+000	0	0	0	0	0	0	2.43366	0	0	57.5363	33.4858
DATA	128	2	43	0	0	A_64_P137168	NM_053912	10957.9	191.616	9.019049e+003	9.019106e+002	8524.5	33	9.367634e+000	0	0	0	0	0	0	8521.53	1	1	48.5334	33.5755
DATA	129	2	44	0	0	A_42_P830598	XM_001063895	10983.5	191.589	8.336693e+002	8.342897e+001	844	32	8.902019e+000	0	0	0	0	0	0	790.613	1	1	48.5334	33.398
DATA	130	2	45	0	0	A_42_P525886	NM_001105716	11008.6	191.427	3.068316e+002	3.085017e+001	357	33	8.634898e+000	0	0	0	0	0	0	291.995	1	1	57.5363	33.8538
DATA	131	2	46	0	0	A_42_P836392	NM_134383	11034.1	191.5	8.401175e+003	8.401236e+002	7889.5	35	8.870240e+000	0	0	0	0	0	0	8021.76	1	1	56.9804	34.9854
DATA	132	2	47	0	0	A_44_P146783	NM_001001366	11059.1	191.556	4.475953e+001	5.493533e+000	117	31	8.264932e+000	0	0	0	0	0	0	42.8704	1	1	47.8731	31.6651
DATA	133	2	48	0	0	A_44_P294675	NM_053687	11084.7	191.5	1.236663e+002	1.276788e+001	191.5	30.5	8.300894e+000	0	0	0	0	0	0	118.796	1	1	57.5363	31.1136
DATA	134	2	49	0	0	A_64_P047137	NM_001001283	11109.9	191.556	1.907227e+001	3.697102e+000	88	31	8.118239e+000	0	0	0	0	0	0	18.3705	1	1	47.8731	31.8578
DATA	135	2	50	0	0	A_44_P170396	NM_017267	11135.5	191.9	2.564198e+001	4.068895e+000	96	33	9.314536e+000	0	0	0	0	0	0	24.7607	1	1	50.4627	33.615
DATA	136	2	51	0	0	A_64_P077603	ENSRNOT00000037503	11161.1	191.5	1.030184e+002	1.077329e+001	173	32	8.343644e+000	0	0	0	0	0	0	99.7015	1	1	56.9804	32.4109
DATA	137	2	52	0	0	A_42_P648800	AA998304	11186.4	191.63	3.375742e+002	3.390369e+001	386.5	32	8.640359e+000	0	0	0	0	0	0	327.354	1	1	48.2044	32.4631
DATA	138	2	53	0	0	A_64_P143186	A_64_P143186	11211.7	191.5	5.926537e+001	6.707203e+000	130	32	8.249589e+000	0	0	0	0	0	0	57.5699	1	1	57.5363	32.5194
DATA	139	2	54	0	0	A_42_P622681	NM_001030020	11237.1	191.757	3.428768e+003	3.428911e+002	3378.5	34	8.845959e+000	0	0	0	1	0	0	3335.58	1	1	46.5243	34.0142
DATA	140	2	55	0	0	A_42_P506076	NM_019253	11262.6	191.573	2.507023e+004	2.507025e+003	24192	31.5	8.217098e+000	0	0	0	0	0	0	24417.6	1	1	57.5363	32.2075
DATA	141	2	56	0	0	A_64_P158975	NM_001109536	11288	191.545	1.429796e+002	1.463643e+001	208	32	8.085422e+000	0	0	0	0	0	0	139.382	1	1	55.8519	32.9543
DATA	142	2	57	0	0	A_42_P655425	NM_001106406	11313.4	191.618	8.509424e+002	8.515170e+001	901	32	8.327429e+000	0	0	0	0	0	0	830.024	1	1	46.8651	32.5404
DATA	143	2	58	0	0	A_44_P408520	NM_031569	11338.6	191.853	1.383298e+002	1.418193e+001	211	32	7.566879e+000	0	0	0	0	0	0	134.969	1	1	46.8651	32.0704
DATA	144	2	59	0	0	A_64_P031259	NM_001002022	11364.1	191.826	1.666889e+002	1.695960e+001	236	32	8.232185e+000	0	0	0	0	0	0	162.636	1	1	46.8651	33.1048
DATA	145	2	60	0	0	A_43_P10227	NM_024397	11389.3	192.141	1.193439e+004	1.193443e+003	11435	37	1.292484e+001	0	0	0	0	0	0	11640.4	1	1	45.4864	38.4219
DATA	146	2	61	0	0	A_42_P542744	NM_001107544	11415	191.897	5.741312e+003	5.741398e+002	5691	25	8.025370e+000	0	0	0	0	1	0	5596.05	1	1	46.8651	25.9372
DATA	147	2	62	0	0	A_64_P052387	A_64_P052387	11440.4	191.573	1.460447e+002	1.493675e+001	201	24	6.481933e+000	0	0	0	0	1	0	142.204	1	1	57.5363	23.7371
DATA	149	2	64	0	0	A_64_P064823	ENSRNOT00000050238	11491.4	191.573	3.035829e+002	3.052051e+001	354	26	6.339179e+000	0	0	0	0	1	0	294.698	1	1	57.5363	25.4187
DATA	150	2	65	0	0	A_42_P730292	NM_001004244	11516.5	191.971	1.677576e+003	1.677872e+002	1740	34	1.400233e+001	0	0	0	0	0	0	1625.23	1	1	47.8731	37.2278
DATA	151	2	66	0	0	A_64_P052878	FM104687	11541.8	192.365	4.104353e+002	4.116472e+001	471	33	1.190572e+001	0	0	0	0	0	0	396.687	1	1	44.7812	35.4925
DATA	152	2	67	0	0	A_64_P157171	XM_001063008	11567.4	192.047	1.779574e+003	1.779855e+002	1867	31	9.142759e+000	0	0	0	0	0	0	1715.15	1	1	44.7812	31.2338
DATA	153	2	68	0	0	A_44_P693350	ENSRNOT00000030985	11592.5	191.648	4.795932e+001	5.751736e+000	122	32	1.154937e+001	0	0	0	0	0	0	46.079	1	1	57.5363	34.0577
DATA	154	2	69	0	0	A_64_P090168	NM_001000720	11618.1	191.935	4.950731e+001	5.887464e+000	123	33	1.062516e+001	0	0	0	0	0	0	47.3998	1	1	65	34.9842
DATA	155	2	70	0	0	A_42_P726392	NM_001106353	11643.2	192.133	1.454462e+003	1.454814e+002	1406	34	8.408403e+000	0	0	0	0	0	0	1387.24	1	1	48.2044	34.4975
DATA	156	2	71	0	0	A_64_P015727	FQ218047	11668.5	192.056	4.285567e+003	4.285688e+002	4063.5	36	8.384133e+000	0	0	0	0	0	0	4070.19	1	1	48.5334	34.9307
DATA	157	2	72	0	0	A_44_P897023	NM_001008364	11694	192.044	8.634933e+002	8.640961e+001	891.5	32.5	8.339643e+000	0	0	0	0	0	0	816.285	1	1	46.8651	33.09
DATA	158	2	73	0	0	A_44_P104776	NM_001001425	11719.3	192.071	7.330834e+001	8.016204e+000	144	33	7.604771e+000	0	0	0	0	0	0	68.9559	1	1	46.5243	32.7184
DATA	159	2	74	0	0	A_64_P142521	A_64_P142521	11745	192.118	1.680477e+001	3.668573e+000	90	32.5	7.928573e+000	0	0	0	0	0	0	15.7206	1	1	46.8651	32.402
DATA	160	2	75	66	1	DarkCorner	DarkCorner	11770.2	192.167	3.291468e+000	3.279796e+000	74	34	8.661562e+000	0	0	0	0	0	0	-0.0922137	0	0	47.5395	33.5972
DATA	161	2	76	66	1	DarkCorner	DarkCorner	11795.6	192.069	3.311990e+000	3.300245e+000	70	32	8.036545e+000	0	0	0	0	0	0	-0.80409	0	0	53.8203	32.9336
DATA	162	2	77	66	1	DarkCorner	DarkCorner	11820.9	192.26	3.333684e+000	3.321862e+000	73	33	8.527903e+000	0	0	0	0	0	0	-2.83147	0	0	47.5395	33.1033
DATA	163	2	78	66	1	DarkCorner	DarkCorner	11846.2	192.429	3.356912e+000	3.345008e+000	72	35	8.626957e+000	0	0	0	0	0	0	-3.18997	0	0	47.2035	35.407
DATA	164	2	79	66	1	DarkCorner	DarkCorner	11871.8	192.357	5.302388e+000	3.411460e+000	78	32	8.671585e+000	0	0	0	0	0	0	4.79993	1	0	47.2035	32.7228
DATA	165	2	80	66	1	DarkCorner	DarkCorner	11896.9	192.29	3.408070e+000	3.395984e+000	74	33	8.388781e+000	0	0	0	0	0	0	-1.2386	0	0	46.1809	33.6493
DATA	166	2	81	66	1	DarkCorner	DarkCorner	11922.7	191.961	3.436564e+000	3.424949e+000	74.5	30	7.095069e+000	0	0	0	0	0	0	0.557621	0	0	49.1849	31.2562
DATA	167	2	82	66	1	DarkCorner	DarkCorner	11947.8	192.387	3.465585e+000	3.470377e+000	78	32	8.426217e+000	0	0	0	0	0	0	3.03799	0	0	49.1849	32.7598
DATA	168	2	83	66	1	DarkCorner	DarkCorner	11973.5	192.352	5.902250e+000	3.534364e+000	80.5	32	8.360677e+000	0	0	0	0	0	0	5.16703	1	0	65	32.9612
DATA	169	2	84	66	1	DarkCorner	DarkCorner	11999	192.455	7.382337e+000	3.594181e+000	82	32	8.720658e+000	0	0	0	0	0	0	6.40246	1	0	55.8519	33.0524
DATA	170	2	85	260	1	GE_BrightCorner	GE_BrightCorner	12024.4	192.427	4.420053e+004	4.420055e+003	38320	32	8.552369e+000	0	0	0	0	0	0	37961.4	1	1	57.5363	33.3866
DATA	171	3	1	66	1	DarkCorner	DarkCorner	9878.58	197.573	3.542693e+000	3.530130e+000	68	32	8.293790e+000	0	0	0	0	0	0	-0.377472	0	0	57.5363	32.7417
DATA	172	3	2	66	1	DarkCorner	DarkCorner	9904.42	197.573	3.562071e+000	3.549439e+000	66	36	1.148015e+001	0	0	0	0	0	0	-1.9429	0	0	57.5363	37.0968
DATA	173	3	3	66	1	DarkCorner	DarkCorner	9929.76	197.917	3.578790e+000	3.566099e+000	63	32	8.317480e+000	0	0	0	0	0	0	-3.22289	0	0	47.5395	33.4909
DATA	174	3	4	66	1	DarkCorner	DarkCorner	9954.67	198.435	3.593031e+000	3.580289e+000	64	34	6.846338e+000	0	0	0	0	0	0	-4.42761	0	0	46.1809	33.75
DATA	175	3	5	66	1	DarkCorner	DarkCorner	9980.5	197.648	3.605333e+000	3.592548e+000	58	34	6.722877e+000	0	0	0	0	0	0	-7.76102	0	0	57.5363	34.3036
DATA	176	3	6	66	1	DarkCorner	DarkCorner	10005.6	197.887	3.615326e+000	3.602506e+000	63	37	1.020090e+001	0	0	0	0	0	0	-3.60533	0	0	50.4627	37.6316
DATA	177	3	7	66	1	DarkCorner	DarkCorner	10030.9	198.138	3.623378e+000	3.610529e+000	64	35	1.122110e+001	0	0	0	0	0	0	-4.99844	0	0	46.1809	37
DATA	178	3	8	66	1	DarkCorner	DarkCorner	10056.6	198.431	3.629563e+000	3.616692e+000	66	35.5	7.897580e+000	0	0	0	0	0	0	-2.94696	0	0	47.2035	35.0741
DATA	179	3	9	66	1	DarkCorner	DarkCorner	10082	198.156	3.633672e+000	3.620786e+000	62	32	7.706107e+000	0	0	0	0	0	0	-5.54982	0	0	48.2044	32.386
DATA	180	3	10	66	1	DarkCorner	DarkCorner	10107.5	198	3.636009e+000	3.623115e+000	60	34	8.727332e+000	0	0	0	0	0	0	-9.32066	0	0	54.1152	33.3818
DATA	181	3	11	0	0	A_64_P269465	ENSRNOT00000055742	10132.7	197.364	2.106952e+001	4.191690e+000	87	36	9.996378e+000	0	0	0	0	0	0	17.7377	1	1	38.2652	35.4063
DATA	182	3	12	0	0	A_64_P140776	NM_001114502	10157.7	198.173	7.482888e+003	7.482976e+002	6276	36	8.132098e+000	0	0	0	0	0	0	6301.15	1	1	49.8279	36.46
DATA	183	3	13	0	0	A_42_P662683	NM_001108855	10183.3	198.219	1.869418e+004	1.869422e+003	15648	33.5	8.950593e+000	0	0	0	0	0	0	15752.9	1	1	48.2044	33.6538
DATA	184	3	14	0	0	A_44_P308687	NM_181389	10208.9	198.232	1.395377e+002	1.441475e+001	183	33	8.037022e+000	0	0	0	0	0	0	117.714	1	1	46.1809	34.6304
DATA	185	3	15	0	0	A_42_P705255	NM_078622	10234	198.203	1.265614e+002	1.316119e+001	180	33	7.600012e+000	0	0	0	0	0	0	106.923	1	1	46.8651	34.2419
DATA	186	3	16	0	0	A_44_P142472	NM_001106072	10259.2	198.209	9.718148e+003	9.718215e+002	8132	34	8.084653e+000	0	0	0	0	0	0	8225.06	1	1	50.4627	33.8364
DATA	187	3	17	0	0	A_64_P015946	NM_001009720	10284.9	198.147	1.048236e+003	1.048853e+002	961	32	1.030346e+001	0	0	0	0	0	0	889.124	1	1	46.1809	35
DATA	188	3	18	0	0	A_64_P118698	ENSRNOT00000050943	10310.2	198.342	5.710977e+001	6.744406e+000	118.5	34	9.911545e+000	0	0	0	0	0	0	48.5607	1	1	48.2044	35.8947
DATA	189	3	19	0	0	A_42_P705302	NM_001107361	10335.9	198.606	7.536067e+003	7.536152e+002	6392.5	35	7.869811e+000	0	0	0	0	0	0	6425.79	1	1	47.5395	35.2955
DATA	190	3	20	0	0	A_64_P097547	NM_001100528	10360.7	198.25	5.569940e+001	6.614315e+000	116	37	7.423323e+000	0	0	0	0	0	0	47.6339	1	1	47.8731	37.4727
DATA	191	3	21	0	0	A_42_P815485	NM_001013908	10386.5	198.5	8.708119e+003	8.708192e+002	7370	34.5	9.279634e+000	0	0	0	0	0	0	7471.85	1	1	49.1849	34.0769
DATA	192	3	22	0	0	A_42_P526728	ENSRNOT00000060758	10412.1	198.507	2.742035e+003	2.742263e+002	2334	34	8.934931e+000	0	0	0	0	0	0	2361.03	1	1	48.5334	34.9818
DATA	193	3	23	0	0	A_42_P692317	NM_001107565	10437.3	198.618	8.853839e+002	8.860873e+001	812	35	7.967824e+000	0	0	0	0	0	0	765.163	1	1	46.5243	35.2264
DATA	194	3	24	0	0	A_44_P383949	NM_175593	10462.9	198.781	3.435618e+001	4.916010e+000	100	35	8.727740e+000	0	0	0	0	0	0	29.8074	1	1	47.5395	36.434
DATA	195	3	25	0	0	A_42_P589570	NM_001014105	10488.3	198.343	3.875667e+002	3.891457e+001	405	34	8.952795e+000	0	0	0	0	0	0	337.609	1	1	47.8731	36.0508
DATA	196	3	26	0	0	A_64_P012384	NM_001039338	10513.6	198.427	1.474227e+002	1.514918e+001	197	33.5	8.033196e+000	0	0	0	0	0	0	128.955	1	1	57.5363	33.28
DATA	197	3	27	0	0	A_64_P088612	NM_053871	10538.9	198.536	4.808220e+003	4.808346e+002	4139	34	8.047302e+000	0	0	0	0	0	0	4223.97	1	1	47.5395	34.8302
DATA	198	3	28	0	0	A_42_P668072	NM_013130	10564.4	198.301	2.481077e+002	2.505050e+001	292	34	9.023426e+000	0	0	0	0	0	0	218.924	1	1	48.5334	35
DATA	199	3	29	0	0	A_44_P624451	NM_001134605	10589.6	198.972	6.835975e+001	7.653617e+000	130.5	34	7.826852e+000	0	0	0	0	0	0	60.5876	1	1	48.2044	33.3137
DATA	200	3	30	0	0	A_64_P118502	A_64_P118502	10615.3	198.5	3.021824e+002	3.041185e+001	339.5	35	9.397789e+000	0	0	0	0	0	0	269.065	1	1	65	35.0392
DATA	201	3	31	0	0	A_43_P15761	NM_031608	10640.4	198.783	1.319375e+002	1.362744e+001	191	38	8.048964e+000	0	0	0	0	0	0	118.014	1	1	46.8651	38.8077
DATA	202	3	32	0	0	A_42_P667696	NM_001191800	10665.7	198.786	2.231087e+003	2.231345e+002	2022	35	7.919905e+000	0	0	0	0	0	0	2004.86	1	1	51.4001	34.36
DATA	203	3	33	0	0	A_44_P899121	NM_001079941	10691.4	198.642	4.312673e+003	4.312806e+002	3979	34	9.407006e+000	0	0	0	0	0	0	3893.61	1	1	45.835	35.2941
DATA	204	3	34	0	0	A_42_P642757	NM_031235	10716.8	198.639	5.511081e+003	5.511184e+002	4990	34.5	7.924483e+000	0	0	0	0	0	0	4998.77	1	1	47.8731	34.3958
DATA	205	3	35	0	0	A_64_P066694	NM_001033898	10742.1	198.704	3.810038e+001	5.071955e+000	104.5	34	1.100228e+001	0	0	0	0	0	0	34.7177	1	1	47.2035	35.098
DATA	206	3	36	0	0	A_42_P699201	TC594545	10767.5	198.5	3.457051e+001	4.801769e+000	101	35.5	9.107992e+000	0	0	0	0	0	0	31.6464	1	1	65	36.0893
DATA	207	3	37	0	0	A_42_P591944	NM_172093	10792.7	198.5	1.229739e+002	1.273704e+001	183	36.5	1.043710e+001	0	0	0	0	0	0	113.08	1	1	65	37.4032
DATA	208	3	38	0	0	A_44_P115293	NM_001108294	10818.3	199	2.565505e+002	2.586675e+001	310	35.5	9.394510e+000	0	0	0	0	0	0	236.979	1	1	44.7812	35.875
DATA	209	3	39	1028	1	(+)E1A_r60_a107	E1A_r60_a107	10842.9	198.873	1.281678e+001	3.529503e+000	84	34	7.839834e+000	0	0	0	0	0	0	11.8895	1	0	46.8651	34.8679
DATA	210	3	40	0	0	A_44_P194531	NM_001007742	10869.1	199.044	2.153922e+002	2.178663e+001	266.5	34	9.155118e+000	0	0	0	0	0	0	200.697	1	1	46.8651	35.6349
DATA	211	3	41	0	0	A_43_P20016	NM_001107377	10894.4	198.972	1.283494e+002	1.324258e+001	190	36	8.179431e+000	0	0	0	0	0	0	120.092	1	1	48.2044	37.3654
DATA	212	3	42	0	0	A_64_P105550	A_64_P105550	10919.2	198.714	1.189133e+002	1.232681e+001	184.5	36.5	8.495473e+000	0	0	0	0	0	0	111.705	1	1	41.8414	35.52
DATA	213	3	43	0	0	A_42_P791872	NM_001135174	10945.1	198.771	9.396140e+003	9.396195e+002	8735	37	1.057772e+001	0	0	0	0	0	0	8861.97	1	1	46.5243	37.3065
DATA	214	3	44	0	0	A_42_P499273	NM_001012148	10970.7	198.662	2.953452e+003	2.953627e+002	2772.5	38	8.447820e+000	0	0	0	0	0	0	2796.14	1	1	48.5334	36.4909
DATA	215	3	45	0	0	A_64_P021960	NM_001109493	10995.5	199.222	2.889899e+002	2.907682e+001	346	37.5	9.858418e+000	0	0	0	0	0	0	274.568	1	1	47.5395	38.5217
DATA	216	3	46	0	0	A_64_P083725	A_64_P083725	11021.4	198.573	1.218661e+005	1.218661e+004	116926	38	9.182423e+000	0	0	0	0	0	0	116188	1	1	57.5363	38.2143
DATA	217	3	47	0	0	A_42_P524536	NM_012698	11046.8	199.265	3.599211e+002	3.613314e+001	408	37	5.649327e+000	0	0	0	0	0	0	344.272	1	1	46.1809	38
DATA	218	3	48	0	0	A_64_P151675	NM_175755	11072	199.424	8.101749e+001	8.703380e+000	151	34	7.921100e+000	0	0	0	0	0	0	77.7294	1	1	45.4864	33.3962
DATA	219	3	49	0	0	A_64_P146914	A_64_P146914	11097.6	198.829	1.772097e+003	1.772381e+002	1733.5	32.5	7.749466e+000	0	0	0	0	0	0	1705.01	1	1	51.0895	33.2679
DATA	220	3	50	0	0	A_64_P115065	NM_001109631	11122.9	198.614	1.942738e+001	3.711541e+000	90	33.5	8.239594e+000	0	0	0	0	0	0	18.7404	1	1	65	35
DATA	221	3	51	0	0	A_42_P468771	NM_001107362	11148.5	199	4.361426e+003	4.361540e+002	4223	40	1.136137e+001	0	0	0	0	0	0	4217.31	1	1	48.5334	38.1373
DATA	222	3	52	0	0	A_44_P226461	NM_053798	11173.7	199.167	1.277146e+003	1.277533e+002	1317	36	8.951079e+000	0	0	0	0	0	0	1237.56	1	1	45.835	36.7907
DATA	223	3	53	0	0	A_64_P009440	NM_001109313	11199.4	199.277	4.389382e+001	5.398206e+000	116	34	1.018501e+001	0	0	0	0	0	0	42.6139	1	1	45.1352	36.3556
DATA	224	3	54	0	0	A_44_P282433	NM_033230	11224.4	198.987	7.468426e+002	7.475012e+001	790	38	1.107208e+001	0	0	0	0	0	0	726.209	1	1	49.1849	38.25
DATA	225	3	55	0	0	A_42_P461003	NM_001044283	11249.9	199.104	1.380764e+004	1.380768e+003	13383.5	37.5	8.525376e+000	0	0	0	0	0	0	13444.2	1	1	46.8651	38.8148
DATA	226	3	56	0	1	ETG10_236652	ETG10_236652	11275.1	199.099	1.823900e+001	3.622511e+000	90	34	9.055204e+000	0	0	0	0	0	0	17.7775	1	1	46.8651	35.2623
DATA	227	3	57	0	0	A_42_P529780	NM_138855	11300.8	199.116	9.255057e+002	9.260339e+001	960	35	9.160080e+000	0	0	0	0	0	0	902.78	1	1	46.5243	36.0182
DATA	228	3	58	0	0	A_42_P492976	NM_001126099	11326.4	199.203	2.893656e+002	2.910492e+001	349	35	1.022524e+001	0	0	0	0	0	0	282.391	1	1	47.2035	35.8889
DATA	229	3	59	0	0	A_42_P533865	NM_001127650	11351.3	199.349	2.899536e+001	4.263348e+000	100	35	9.754115e+000	0	0	0	0	0	0	28.3009	1	1	44.7812	37.4727
DATA	230	3	60	0	0	A_64_P026399	NM_001007626	11376.9	199.055	1.072521e+003	1.072977e+002	1120	37	1.082565e+001	0	0	0	0	0	0	1046.65	1	1	46.8651	37.4286
DATA	231	3	61	0	0	A_64_P152543	XM_221353	11402.5	199.227	1.578341e+004	1.578344e+003	15562	40	1.367184e+001	0	0	0	0	0	0	15395.2	1	1	46.5243	39.2105
DATA	232	3	62	0	0	A_44_P203195	NM_053585	11427.8	199.194	1.015108e+003	1.015591e+002	1079	26	1.295344e+001	0	0	0	0	1	0	989.332	1	1	47.5395	30.4286
DATA	233	3	63	0	0	A_42_P490612	NM_001108262	11453.2	199.519	4.752152e+003	4.752255e+002	4505	26	7.663080e+000	0	0	0	0	1	0	4626.22	1	1	49.8279	25.8367
DATA	234	3	64	0	0	A_44_P457548	NM_001103351	11478.5	199.222	5.217347e+001	6.088544e+000	123	27	7.205695e+000	0	0	0	0	1	0	50.7145	1	1	47.5395	27.42
DATA	235	3	65	0	0	A_42_P755665	NM_001013154	11503.9	199.352	1.095874e+003	1.096325e+002	1081	28	1.029793e+001	0	0	0	1	1	0	1063.27	1	1	47.8731	29.44
DATA	236	3	66	0	0	A_42_P781999	NM_001106378	11529.2	199.239	1.553506e+004	1.553509e+003	14910	37	1.107618e+001	0	0	0	0	0	0	15039.8	1	1	46.8651	36.3182
DATA	237	3	67	0	0	A_44_P100289	ENSRNOT00000049514	11554.9	199.406	8.444968e+001	9.016551e+000	144	31.5	1.034555e+001	0	0	0	0	0	0	81.5474	1	1	47.2035	32.7609
DATA	238	3	68	0	0	A_42_P629599	ENSRNOT00000023101	11580.8	199.815	4.411378e+002	4.422743e+001	493.5	33	1.535740e+001	0	0	0	0	0	0	424.721	1	1	40.6843	39.1957
DATA	239	3	69	0	0	A_44_P192083	NM_001047088	11605.4	199.427	9.267615e+001	9.797628e+000	155	41	1.907515e+001	0	0	0	0	0	0	88.9399	1	1	57.5363	45.4468
DATA	240	3	70	0	0	A_42_P498066	NM_031136	11630.6	199.427	8.516583e+004	8.516583e+003	81147	39	1.082124e+001	0	0	0	0	0	0	81436.6	1	1	57.5363	39.6346
DATA	241	3	71	0	0	A_42_P519910	NM_001106292	11656.4	199.427	2.652336e+004	2.652338e+003	25099.5	36	1.013632e+001	0	0	0	0	0	0	25258	1	1	57.5363	37.3
DATA	242	3	72	0	0	A_42_P657538	NM_001008362	11681.5	199.722	3.487960e+003	3.488108e+002	3290	38.5	1.088036e+001	0	0	0	0	0	0	3307.21	1	1	48.2044	39.3864
DATA	243	3	73	0	0	A_64_P030630	NM_001109610	11706.9	199.345	5.688600e+003	5.688692e+002	5373	33.5	9.499624e+000	0	0	0	0	0	0	5367.75	1	1	52.9257	35.3929
DATA	244	3	74	0	0	A_44_P126366	NM_001017456	11732.4	199.754	6.171466e+001	6.974796e+000	130.5	36	9.106214e+000	0	0	0	0	0	0	57.934	1	1	45.4864	36.2745
DATA	245	3	75	0	0	A_43_P15627	ENSRNOT00000067029	11757.4	199.727	3.607171e+001	4.867121e+000	109	37	9.566941e+000	0	0	0	0	0	0	33.6768	1	1	45.835	38.1224
DATA	246	3	76	0	0	A_42_P754784	CB328432	11783	199.657	6.660930e+003	6.661011e+002	6101	33	8.652793e+000	0	0	0	0	0	0	6181.47	1	1	45.4864	33.2264
DATA	247	3	77	66	1	DarkCorner	DarkCorner	11808.1	199.628	3.319771e+000	3.307999e+000	71	32	6.836622e+000	0	0	0	0	0	0	-3.20568	0	0	49.8279	33.0364
DATA	248	3	78	66	1	DarkCorner	DarkCorner	11833.6	199.541	3.342344e+000	3.330491e+000	73	33	8.742195e+000	0	0	0	0	0	0	-2.21419	0	0	48.8603	34.2143
DATA	249	3	79	66	1	DarkCorner	DarkCorner	11859.4	199.427	3.366674e+000	3.354735e+000	71.5	37	9.731672e+000	0	0	0	0	0	0	-0.818326	0	0	57.5363	36.8644
DATA	250	3	80	66	1	DarkCorner	DarkCorner	11884.6	199.427	4.152135e+000	3.405266e+000	77	33	8.629001e+000	0	0	0	0	0	0	3.74771	1	0	57.5363	35.3269
DATA	251	3	81	66	1	DarkCorner	DarkCorner	11910.1	199.492	3.418990e+000	3.406865e+000	71.5	33	9.085759e+000	0	0	0	0	0	0	-2.18768	0	0	45.1352	34.4259
DATA	252	3	82	66	1	DarkCorner	DarkCorner	11935.5	199.529	3.485977e+000	3.452938e+000	77.5	33	1.098606e+001	0	0	0	0	0	0	3.09566	1	0	46.5243	35.9474
DATA	253	3	83	66	1	DarkCorner	DarkCorner	11960.7	199.5	3.255093e+001	4.754191e+000	98	36	9.135605e+000	0	0	0	1	0	0	28.6579	1	1	57.5363	36.5965
DATA	254	3	84	66	1	DarkCorner	DarkCorner	11986.6	199.125	3.510067e+000	3.506576e+000	76	35	9.280235e+000	0	0	0	0	0	0	2.18461	0	0	48.2044	34.8594
DATA	255	3	85	66	1	DarkCorner	DarkCorner	12011.6	199.573	1.087359e+001	3.693878e+000	84	37	9.946446e+000	0	0	0	1	0	0	9.39648	1	0	57.5363	37.7742
DATA	256	4	1	66	1	DarkCorner	DarkCorner	9890.6	205.083	3.553545e+000	3.540944e+000	63.5	35	1.139098e+001	0	0	0	0	0	0	-4.92633	0	0	48.2044	37.1754
DATA	257	4	2	66	1	DarkCorner	DarkCorner	9916.34	205.568	3.571707e+000	3.559041e+000	60	36	1.081288e+001	0	0	0	0	0	0	-5.91943	0	0	48.5334	36.5806
DATA	258	4	3	66	1	DarkCorner	DarkCorner	9941.52	205.213	3.587026e+000	3.574306e+000	60	36.5	8.705706e+000	0	0	0	0	0	0	-10.037	0	0	49.1849	35.7813
DATA	259	4	4	66	1	DarkCorner	DarkCorner	9967.5	205.352	3.600609e+000	3.587841e+000	61.5	34	7.915198e+000	0	0	0	0	0	0	-6.55836	0	0	57.5363	36.0417
DATA	260	4	5	66	1	DarkCorner	DarkCorner	9992.6	205.727	3.611607e+000	3.598800e+000	62	34	8.112106e+000	0	0	0	0	0	0	-5.12322	0	0	49.8279	34.963
DATA	261	4	6	66	1	DarkCorner	DarkCorner	10018.3	205.792	3.620693e+000	3.607854e+000	59.5	37.5	9.257644e+000	0	0	0	0	0	0	-9.43453	0	0	47.5395	37.8056
DATA	262	4	7	66	1	DarkCorner	DarkCorner	10043.5	205.902	3.627626e+000	3.614761e+000	63.5	37	9.427335e+000	0	0	0	0	0	0	-4.77579	0	0	50.4627	36.5185
DATA	263	4	8	66	1	DarkCorner	DarkCorner	10069.3	205.778	3.632693e+000	3.619811e+000	62	31	8.354333e+000	0	0	0	0	0	0	-6.36066	0	0	50.7771	33.1111
DATA	264	4	9	66	1	DarkCorner	DarkCorner	10094.3	205.328	3.635774e+000	3.622881e+000	60	37	1.047246e+001	0	0	0	0	0	0	-6.7854	0	0	46.1809	36.3793
DATA	265	4	10	0	0	A_44_P807031	NM_001108921	10119.7	205.547	7.523637e+003	7.523724e+002	6388.5	38.5	8.940500e+000	0	0	0	0	0	0	6332.77	1	1	52.0157	38.3056
DATA	266	4	11	0	0	A_64_P025813	NM_001009379	10145.4	205.427	3.938906e+000	3.645398e+000	73	37.5	9.276879e+000	0	0	0	0	0	0	3.31569	1	0	57.5363	37.0625
DATA	267	4	12	0	0	A_64_P130551	XM_001081846	10170.6	205.427	1.533527e+001	3.933483e+000	84	40	8.706487e+000	0	0	0	0	0	0	12.9154	1	0	57.5363	38.8929
DATA	268	4	13	0	0	A_42_P715449	NM_001033709	10196.4	205.427	2.166676e+003	2.166978e+002	1893.5	40.5	9.891721e+000	0	0	0	0	0	0	1826.49	1	1	57.5363	39.6154
DATA	269	4	14	0	0	A_42_P727584	NM_031622	10221.4	205.87	4.122675e+003	4.122833e+002	3521	33	5.986780e+000	0	0	0	0	0	0	3479.83	1	1	46.8651	34.1923
DATA	270	4	15	0	0	A_42_P600642	NM_001008386	10247	205.455	3.850783e+002	3.867650e+001	396	33	8.143868e+000	0	0	0	0	0	0	325.584	1	1	55.8519	33.5
DATA	271	4	16	0	0	A_42_P669103	NM_001108329	10272.1	206.045	1.038412e+003	1.039036e+002	916	34	9.091190e+000	0	0	0	0	0	0	879.724	1	1	46.5243	34.3235
DATA	272	4	17	0	0	A_44_P715330	NM_001024966	10297.8	205.621	6.424674e+002	6.434710e+001	607	33	9.145603e+000	0	0	0	0	0	0	545.575	1	1	45.4864	33.7273
DATA	273	4	18	0	0	A_64_P083185	NM_001107199	10323.3	205.5	6.406481e+002	6.416492e+001	611	36	1.036727e+001	0	0	0	0	0	0	545.47	1	1	57.5363	38.8621
DATA	274	4	19	0	0	A_64_P037313	ENSRNOT00000030164	10348.5	205.5	2.472377e+001	4.344708e+000	92	36	7.345542e+000	0	0	0	0	0	0	21.1114	1	1	57.5363	37.0968
DATA	275	4	20	0	0	A_44_P321009	NM_012540	10373.9	205.5	1.496869e+001	3.863172e+000	82.5	38	6.791994e+000	0	0	0	0	0	0	12.8221	1	0	65	37.7419
DATA	276	4	21	0	0	A_42_P700753	FQ212883	10399.2	206.265	2.290358e+003	2.290633e+002	2006	36	9.707419e+000	0	0	0	0	0	0	1968.54	1	1	46.1809	36.6552
DATA	277	4	22	0	0	A_44_P775974	NM_001024363	10424.6	205.573	1.404590e+001	3.805337e+000	80	37	7.604574e+000	0	0	0	0	0	0	12.1158	1	0	57.5363	36.2727
DATA	278	4	23	0	0	A_44_P503868	A_44_P503868	10449.9	206.222	1.826318e+003	1.826658e+002	1673.5	35.5	8.032119e+000	0	0	0	0	0	0	1581.33	1	1	45.4864	35.8421
DATA	279	4	24	0	0	A_64_P122541	A_64_P122541	10475	206.226	1.924250e+002	1.955992e+001	240.5	38	1.093953e+001	0	0	0	0	0	0	167.266	1	1	45.4864	40.0625
DATA	280	4	25	0	0	A_64_P080967	NM_001033890	10501	205.729	1.302119e+004	1.302124e+003	11273	36	9.947500e+000	0	0	0	0	0	0	11366.5	1	1	46.8651	37.6765
DATA	281	4	26	0	0	A_44_P1056309	NM_001105912	10526.4	205.573	2.338747e+001	4.192818e+000	91	35	1.016372e+001	0	0	0	0	0	0	20.5024	1	1	57.5363	34.6364
DATA	282	4	27	0	0	A_44_P199514	NM_001005564	10551.6	206.281	2.979967e+003	2.980169e+002	2641	35	1.439373e+001	0	0	0	0	0	0	2623.7	1	1	44.7812	40.4444
DATA	283	4	28	0	0	A_64_P097952	NM_001134962	10576.4	206.099	4.163683e+001	5.407207e+000	102	34	7.850117e+000	0	0	0	0	0	0	36.8186	1	1	47.8731	35.0714
DATA	284	4	29	0	0	A_42_P813939	NM_001108741	10602.3	205.864	2.351859e+003	2.352109e+002	2138	35	8.388195e+000	0	0	0	0	0	0	2089.33	1	1	50.4627	35.1481
DATA	285	4	30	0	0	A_64_P006423	NM_012584	10627.1	205.775	1.529805e+001	3.745323e+000	83	40	7.099226e+000	0	0	0	0	0	0	13.6513	1	0	47.2035	40.4483
DATA	286	4	31	0	0	A_42_P670614	NM_001107097	10653.1	206.373	6.605302e+003	6.605390e+002	5867.5	37	9.199404e+000	0	0	0	0	0	0	5922.23	1	1	45.835	37.125
DATA	287	4	32	0	0	A_64_P084088	NM_001011954	10678.6	206.373	7.409591e+002	7.417326e+001	731	37	1.106729e+001	0	0	0	0	0	0	667.442	1	1	46.1809	38.7879
DATA	288	4	33	0	0	A_64_P025643	XM_001073566	10704	205.545	2.894375e+002	2.913939e+001	326	37	8.664453e+000	0	0	0	0	0	0	261.936	1	1	55.8519	38.0357
DATA	289	4	34	0	0	A_42_P719607	NM_153721	10729.1	205.984	1.567477e+001	3.703553e+000	83	37	8.332067e+000	0	0	0	0	0	0	14.2508	1	0	45.4864	36.56
DATA	290	4	35	0	0	A_42_P843603	NM_052800	10754.7	206.284	4.097686e+002	4.111275e+001	442	40	7.001690e+000	0	0	0	0	0	0	374.28	1	1	46.1809	38.0968
DATA	291	4	36	0	0	A_44_P234129	NM_001135802	10779.8	206.303	1.576653e+002	1.611329e+001	213	41	9.263575e+000	0	0	0	0	0	0	144.662	1	1	45.4864	40.2703
DATA	292	4	37	0	0	A_42_P701161	NM_001033666	10805.3	206.357	6.993264e+003	6.993343e+002	6311	42	1.057020e+001	0	0	0	0	0	0	6445.68	1	1	46.8651	40.3333
DATA	293	4	38	0	0	A_44_P1017335	NM_001108607	10831	206.424	9.362173e+003	9.362231e+002	8453	38.5	7.868309e+000	0	0	0	0	0	0	8668.02	1	1	45.4864	39.6563
DATA	294	4	39	0	0	A_44_P900209	CV121387	10856.1	206.23	1.094099e+002	1.142231e+001	172	34.5	6.384323e+000	0	0	0	0	0	0	101.734	1	1	47.5395	35.1429
DATA	295	4	40	0	0	A_64_P037517	ENSRNOT00000014921	10881.8	206.11	7.448854e+001	8.133694e+000	138.5	36	7.775182e+000	0	0	0	0	0	0	69.5615	1	1	47.5395	36.8649
DATA	296	4	41	0	0	A_64_P128528	NM_001106013	10907	206.136	2.538977e+003	2.539185e+002	2531	34.5	8.778883e+000	0	0	0	0	0	0	2380.75	1	1	46.5243	36.4286
DATA	297	4	42	0	0	A_64_P378865	NM_001000706	10932.1	206.143	9.523383e+001	1.005962e+001	162	38	9.983989e+000	0	0	0	0	0	0	89.6536	1	1	46.8651	39.3235
DATA	298	4	43	0	0	A_42_P553960	NM_001107831	10958	206.203	9.616048e+003	9.616102e+002	9002	40	9.217191e+000	0	0	0	0	0	0	9088.27	1	1	46.8651	40.5526
DATA	299	4	44	0	0	A_42_P717654	XM_001063683	10983.3	206.1	3.931403e+003	3.931534e+002	3719.5	43	1.073071e+001	0	0	0	0	0	0	3729.33	1	1	47.2035	42.0741
DATA	300	4	45	0	0	A_44_P295118	NM_001107228	11008.5	206	3.059522e+002	3.076260e+001	358	36	1.024629e+001	0	0	0	0	0	0	291.244	1	1	54.1152	37.6857
DATA	301	4	46	0	0	A_64_P049057	ENSRNOT00000014519	11034	206.139	1.519437e+003	1.519773e+002	1494	38	8.002158e+000	0	0	0	0	0	0	1451.27	1	1	46.8651	37.4865
DATA	302	4	47	0	0	A_42_P810287	NM_001004107	11059.3	206.225	2.450115e+003	2.450322e+002	2341	35	7.123106e+000	0	0	0	0	0	0	2347.55	1	1	47.2035	34.3636
DATA	303	4	48	0	0	A_42_P702729	NM_001107557	11085	206.418	2.139058e+003	2.139293e+002	2088	31.5	8.245661e+000	0	0	0	0	0	0	2055.65	1	1	45.835	32.4063
DATA	304	4	49	0	0	A_42_P811084	NM_173147	11110.4	206.37	2.723170e+003	2.723355e+002	2647.5	32	7.331355e+000	0	0	0	0	0	0	2624.13	1	1	48.2044	33.0345
DATA	305	4	50	0	0	A_64_P151473	A_64_P151473	11135.5	206.352	6.231211e+004	6.231212e+003	59470.5	38.5	9.632279e+000	0	0	0	0	0	0	60194.5	1	1	57.5363	38.2083
DATA	306	4	51	0	0	A_44_P134634	ENSRNOT00000000260	11160.9	205.984	1.060002e+002	1.105841e+001	177	37.5	1.170141e+001	0	0	0	0	0	0	102.629	1	1	45.4864	39.1389
DATA	307	4	52	0	0	A_44_P178479	NM_001135039	11186.4	206.13	8.921502e+002	8.927042e+001	913	37	9.425975e+000	0	0	0	0	0	0	865.523	1	1	46.8651	38.8148
DATA	308	4	53	0	0	A_64_P317400	ENSRNOT00000068382	11211.6	206.427	2.359340e+001	3.926804e+000	95	38	1.226268e+001	0	0	0	0	0	0	22.9294	1	1	57.5363	38.96
DATA	309	4	54	0	0	A_42_P781735	NM_053319	11237.4	206.427	8.707160e+004	8.707160e+003	84984	40.5	9.792968e+000	0	0	0	0	0	0	84749	1	1	57.5363	39.9688
DATA	310	4	55	0	0	A_64_P144869	NM_017131	11262.6	206.556	3.758090e+002	3.771106e+001	432	36	9.962894e+000	0	0	0	0	0	0	366.225	1	1	48.2044	38
DATA	311	4	56	0	0	A_44_P445484	ENSRNOT00000049980	11287.9	206.488	8.294188e+002	8.300083e+001	883.5	34.5	1.014423e+001	0	0	0	0	0	0	809.005	1	1	50.4627	36.5
DATA	312	4	57	0	0	A_42_P487832	NM_001108389	11313.4	206.13	1.874981e+003	1.875241e+002	1872	34	9.827498e+000	0	0	0	0	0	0	1829.96	1	1	46.8651	35.3333
DATA	313	4	58	0	0	A_42_P482829	NM_001108138	11338.7	206.373	1.006701e+003	1.007186e+002	1049	37	8.948469e+000	0	0	0	0	0	0	982.855	1	1	46.1809	37.5652
DATA	314	4	59	0	0	A_64_P101440	XM_001065775	11364.4	206.427	6.843158e+000	3.198686e+000	79	34.5	7.320982e+000	0	0	0	0	0	0	6.68115	1	0	57.5363	35.375
DATA	315	4	60	0	0	A_64_P072268	NM_001002277	11389.3	206.552	6.546593e+002	6.554049e+001	726	42.5	1.149613e+001	0	0	0	0	0	0	638.973	1	1	46.5243	41.3333
DATA	316	4	61	0	0	A_42_P589190	NM_023104	11415.2	206.71	8.868978e+002	8.874491e+001	905	44	1.345866e+001	0	0	0	0	0	0	865.097	1	1	46.8651	43.2759
DATA	317	4	62	0	0	A_64_P027328	A_64_P027328	11440.6	206.785	3.984211e+002	3.996491e+001	421	29	3.247602e+001	0	0	1	0	0	0	388.255	1	1	50.4627	41.3929
DATA	318	4	63	0	0	A_42_P788541	NM_001106794	11465.9	206.757	2.977313e+003	2.977479e+002	2975	29	7.473394e+000	0	0	0	0	1	0	2897.57	1	1	46.5243	29.4194
DATA	319	4	64	0	0	A_42_P457003	NM_012802	11491.3	206.778	2.150689e+003	2.150918e+002	2027	27.5	9.496639e+000	0	0	0	0	0	0	2089.65	1	1	47.5395	30.8846
DATA	320	4	65	0	0	A_64_P095695	A_64_P095695	11516.5	206.5	9.240101e+001	9.761002e+000	149	32	1.192223e+001	0	0	0	0	0	0	89.5989	1	1	57.5363	33.4444
DATA	321	4	66	0	0	A_42_P463880	NM_001013927	11542.7	205.698	8.632614e+001	9.190703e+000	155	34	9.450959e+000	0	0	0	0	0	0	83.5005	1	1	36.1258	35.2222
DATA	322	4	67	0	0	A_43_P20354	NM_001134574	11567.5	206.018	1.195544e+002	1.236657e+001	187.5	33.5	1.206546e+001	0	0	0	0	0	0	115.337	1	1	42.2201	36.8462
DATA	323	4	68	0	0	A_64_P055958	ENSRNOT00000056114	11592.6	206.573	7.772254e+001	8.394500e+000	141	36	2.193277e+001	0	0	0	0	0	0	74.7563	1	1	57.5363	44.1892
DATA	324	4	69	0	0	A_64_P159044	ENSRNOT00000040690	11618.1	206.5	5.780466e+002	5.789221e+001	622	35	1.153676e+001	0	0	0	0	0	0	554.061	1	1	65	37.5
DATA	325	4	70	0	0	A_44_P473234	ENSRNOT00000024858	11643.5	206.5	7.275809e+002	7.282820e+001	758	39.5	1.124040e+001	0	0	0	0	0	0	694.734	1	1	57.5363	40.6765
DATA	326	4	71	0	0	A_42_P797965	NM_001108497	11668.5	206.868	1.013644e+003	1.014151e+002	1018	38	8.623779e+000	0	0	0	0	0	0	963.935	1	1	49.8279	38.75
DATA	327	4	72	0	0	A_42_P592157	NM_001002828	11694.4	206.573	2.688972e+002	2.708220e+001	329	40.5	1.143598e+001	0	0	0	0	0	0	254.512	1	1	57.5363	41.3333
DATA	328	4	73	0	0	A_64_P016419	NM_001000622	11719.2	207.031	3.095908e+001	4.480255e+000	101	39	9.833370e+000	0	0	0	0	0	0	29.1631	1	1	45.835	37.8148
DATA	329	4	74	0	0	A_44_P306863	XM_344447	11745	207.226	1.238210e+003	1.238638e+002	1267	41	1.133528e+001	0	0	0	0	0	0	1160.09	1	1	45.4864	42.1667
DATA	330	4	75	0	0	A_42_P471835	TC610276	11770.4	207.014	3.439013e+003	3.439169e+002	3172	34	8.396868e+000	0	0	0	0	0	0	3203.6	1	1	47.2035	34.6897
DATA	331	4	76	0	1	ETG02_36680	ETG02_36680	11795.4	207.333	9.665656e+000	3.433344e+000	83	33	6.275882e+000	0	0	0	1	0	0	8.9503	1	0	47.5395	33.3793
DATA	332	4	77	66	1	DarkCorner	DarkCorner	11821.4	206.573	3.328602e+000	3.316798e+000	71	35	6.835585e+000	0	0	0	0	0	0	-2.7102	0	0	57.5363	36.3243
DATA	333	4	78	66	1	DarkCorner	DarkCorner	11846.1	206.878	3.350852e+000	3.338969e+000	71.5	38	8.143249e+000	0	0	0	0	0	0	-2.65334	0	0	51.0895	38
DATA	334	4	79	66	1	DarkCorner	DarkCorner	11871.7	206.824	3.375603e+000	3.363632e+000	70	37	8.625912e+000	0	0	0	0	0	0	-6.27446	0	0	48.5334	36.7778
DATA	335	4	80	66	1	DarkCorner	DarkCorner	11897.3	206.971	3.401706e+000	3.389643e+000	71	38.5	9.711981e+000	0	0	0	0	0	0	-2.80497	0	0	46.1809	37
DATA	336	4	81	66	1	DarkCorner	DarkCorner	11922.7	206.781	3.429398e+000	3.417237e+000	72.5	37	1.193252e+001	0	0	0	0	0	0	-3.81231	0	0	48.5334	39.4194
DATA	337	4	82	66	1	DarkCorner	DarkCorner	11948.4	207.063	3.458724e+000	3.446459e+000	72.5	39	1.236979e+001	0	0	0	0	0	0	-3.36569	0	0	49.8279	39.4
DATA	338	4	83	66	1	DarkCorner	DarkCorner	11972.9	207.016	4.857234e+000	3.509807e+000	77.5	39	8.439310e+000	0	0	0	0	0	0	4.26283	1	0	45.1352	39.6829
DATA	339	4	84	66	1	DarkCorner	DarkCorner	11999.2	206.855	3.967279e+000	3.531892e+000	79	36	8.375389e+000	0	0	0	0	0	0	3.44854	1	0	48.5334	36.2703
DATA	340	4	85	66	1	DarkCorner	DarkCorner	12024.2	206.958	1.073973e+001	3.702115e+000	84	33	8.406434e+000	0	0	0	1	0	0	9.24753	1	0	46.8651	33.8316
DATA	341	5	1	66	1	DarkCorner	DarkCorner	9878.21	212.944	3.545553e+000	3.532980e+000	67	32	8.189162e+000	0	0	0	0	0	0	-2.07791	0	0	46.8651	32.733
DATA	342	5	2	66	1	DarkCorner	DarkCorner	9903.69	212.615	3.564439e+000	3.551798e+000	65	39	9.390707e+000	0	0	0	0	0	0	-4.43113	0	0	53.5237	38.2353
DATA	343	5	3	66	1	DarkCorner	DarkCorner	9928.99	212.382	3.580882e+000	3.568183e+000	62	33.5	9.775886e+000	0	0	0	0	0	0	-5.38719	0	0	49.1849	34.4286
DATA	344	5	4	66	1	DarkCorner	DarkCorner	9954.89	212.5	3.595448e+000	3.582698e+000	61	34	7.573349e+000	0	0	0	0	0	0	-6.95918	0	0	56.9804	34.0882
DATA	345	5	5	66	1	DarkCorner	DarkCorner	9979.56	213.194	3.607264e+000	3.594472e+000	60	33.5	9.425528e+000	0	0	0	0	0	0	-9.02848	0	0	47.8731	34.6667
DATA	346	5	6	66	1	DarkCorner	DarkCorner	10005.1	212.928	3.617246e+000	3.604419e+000	60	37	9.965487e+000	0	0	0	0	0	0	-11.4135	0	0	51.7088	36.5714
DATA	347	5	7	66	1	DarkCorner	DarkCorner	10031.1	212.507	3.625257e+000	3.612401e+000	58.5	38	1.207713e+001	0	0	0	0	0	0	-11.6727	0	0	48.8603	39.1667
DATA	348	5	8	66	1	DarkCorner	DarkCorner	10056.7	213.284	3.631263e+000	3.618386e+000	61	37	1.034848e+001	0	0	0	0	0	0	-7.45555	0	0	47.8731	35.3448
DATA	349	5	9	66	1	DarkCorner	DarkCorner	10081.9	212.5	1.727649e+001	4.942577e+000	73.5	36.5	8.595249e+000	0	0	0	1	0	0	14.5502	1	0	56.9804	34.7857
DATA	350	5	10	0	0	A_43_P17919	XM_001070979	10107.4	212.573	3.441919e+001	4.998356e+000	98	39	8.051447e+000	0	0	0	0	0	0	28.9701	1	1	57.5363	38.6774
DATA	351	5	11	0	0	A_42_P826221	NM_012933	10132.7	212.9	5.548444e+003	5.548563e+002	4541	36	9.948818e+000	0	0	0	0	0	0	4669.39	1	1	47.2035	36.4865
DATA	352	5	12	0	0	A_64_P011524	NM_001194951	10158.2	212.863	8.246167e+002	8.254126e+001	745	36	7.057931e+000	0	0	0	0	0	0	694.189	1	1	47.5395	37.5758
DATA	353	5	13	0	0	A_44_P258417	NM_001009699	10183.4	212.573	1.054781e+002	1.115209e+001	163	40	9.544576e+000	0	0	0	0	0	0	88.8603	1	1	57.5363	38.0323
DATA	354	5	14	0	0	A_64_P164617	A_64_P164617	10208.6	212.573	6.520041e+004	6.520042e+003	54626	41.5	1.349611e+001	0	0	0	0	0	0	54989.8	1	1	57.5363	43.8333
DATA	355	5	15	0	0	A_42_P758933	NM_001106476	10234.1	213.286	8.216051e+003	8.216131e+002	6527.5	33	7.717429e+000	0	0	0	0	0	0	6939.85	1	1	46.8651	34.0606
DATA	356	5	16	0	0	A_42_P573312	NM_001134761	10259.6	213.265	6.393257e+002	6.403412e+001	619	36	1.046880e+001	0	0	0	0	0	0	541.029	1	1	46.5243	36.0645
DATA	357	5	17	0	0	A_64_P096257	NM_001160228	10285	212.897	1.044119e+003	1.044738e+002	917	33	8.299825e+000	0	0	0	0	0	0	885.522	1	1	46.8651	33.125
DATA	358	5	18	0	0	A_43_P15847	NM_178847	10310.4	213.123	1.035855e+002	1.096237e+001	161	34	1.130420e+001	0	0	0	0	0	0	88.0714	1	1	44.7812	36.4194
DATA	359	5	19	0	0	A_64_P139962	NM_001000675	10335.6	212.573	1.513748e+001	3.885183e+000	82	36	6.739089e+000	0	0	0	0	0	0	12.9059	1	0	57.5363	36.0625
DATA	360	5	20	0	0	A_64_P117474	NM_001000646	10361.1	213.254	1.564179e+001	3.895116e+000	81	39	6.326282e+000	0	0	0	0	0	0	13.3766	1	0	45.835	38.5143
DATA	361	5	21	0	1	ERCC-00075_180	ERCC-00075_180	10386.5	212.648	4.109898e+001	5.434426e+000	106	37.5	1.055014e+001	0	0	0	0	0	0	35.2631	1	1	57.5363	39.75
DATA	362	5	22	0	0	A_42_P740730	NM_001012136	10412	212.681	2.975618e+001	4.626798e+000	92	36	8.453829e+000	0	0	0	0	0	0	25.6211	1	1	58.0869	35.3429
DATA	363	5	23	0	0	A_42_P702258	NM_017227	10437.5	212.648	3.048062e+001	4.663739e+000	95	36	9.373145e+000	0	0	0	0	0	0	26.3428	1	1	57.5363	37.7568
DATA	364	5	24	0	0	A_42_P668800	NM_001127553	10462.8	213.157	1.292219e+003	1.292697e+002	1184.5	33	5.408393e+000	0	0	0	0	0	0	1121.13	1	1	46.5243	33.4074
DATA	365	5	25	0	0	A_42_P842513	NM_031077	10488.2	213.103	5.429909e+003	5.430022e+002	4736	37	9.651898e+000	0	0	0	0	0	0	4730.11	1	1	46.5243	38.6774
DATA	366	5	26	0	0	A_64_P047697	NM_001161835	10513.5	213	5.489925e+002	5.500991e+001	538	38	8.376234e+000	0	0	0	0	0	0	480.243	1	1	54.1152	36.8065
DATA	367	5	27	0	0	A_42_P660036	NM_001134727	10539	213.203	2.388817e+002	2.413921e+001	279	33	1.271186e+001	0	0	0	1	0	0	209.874	1	1	46.8651	36.5161
DATA	368	5	28	0	0	A_64_P095050	A_64_P095050	10564.5	213	6.242900e+004	6.242901e+003	55096	34	1.309924e+001	0	0	0	0	0	0	55092	1	1	54.1152	39.56
DATA	369	5	29	0	0	A_42_P561835	ENSRNOT00000043937	10589.9	213.294	2.512095e+002	2.535558e+001	295	30	8.170444e+000	0	0	0	0	0	0	222.685	1	1	45.835	32.4483
DATA	370	5	30	0	0	A_64_P098774	ENSRNOT00000002068	10614.8	213.222	2.168639e+001	4.054726e+000	90	39	1.021744e+001	0	0	0	0	0	0	19.3102	1	1	47.8731	39.3704
DATA	371	5	31	0	0	A_64_P163184	NM_001107855	10640.6	213.357	7.097180e+002	7.105368e+001	703.5	39	7.483821e+000	0	0	0	0	0	0	634.929	1	1	47.2035	39.5152
DATA	372	5	32	0	0	A_42_P549675	NM_080577	10666	213.203	4.384692e+003	4.384824e+002	3861	35	8.555197e+000	0	0	0	0	0	0	3940.9	1	1	46.8651	35.5161
DATA	373	5	33	0	0	A_64_P287740	NM_001127601	10691.5	213.352	5.969341e+001	6.859025e+000	123	37	8.389531e+000	0	0	0	0	0	0	53.9033	1	1	57.5363	36.7931
DATA	374	5	34	0	0	A_64_P059545	NM_053477	10716.9	213.054	4.911527e+003	4.911642e+002	4637	36	8.455322e+000	0	0	0	0	0	0	4455.78	1	1	42.5954	36.3226
DATA	375	5	35	0	0	A_44_P465856	NM_199398	10742.1	213.386	5.973040e+000	3.400086e+000	74	38.5	7.193548e+000	0	0	0	0	0	0	5.44384	1	0	65	37.3333
DATA	376	5	36	0	0	A_42_P714075	NM_031723	10767.5	213.5	8.895186e+002	8.901423e+001	853	36	7.650139e+000	0	0	0	1	0	0	814.453	1	1	49.1849	35.8966
DATA	377	5	37	0	0	A_42_P605265	NM_053677	10792.8	213.551	3.779221e+001	5.028258e+000	102	39	1.167262e+001	0	0	0	0	0	0	34.7602	1	1	46.8651	39.25
DATA	378	5	38	0	0	A_64_P047401	NM_001009369	10818.1	213.732	3.539321e+003	3.539475e+002	3274.5	37	8.274329e+000	0	0	0	0	0	0	3269.95	1	1	47.5395	38.7419
DATA	379	5	39	0	0	A_64_P018891	A_64_P018891	10843.6	213.427	9.833757e+001	1.036869e+001	163	37	5.283775e+000	0	0	0	0	0	0	91.2556	1	1	57.5363	35.5806
DATA	380	5	40	0	0	A_64_P026297	NM_022583	10868.8	213.871	6.652754e+001	7.414439e+000	131	37	8.460125e+000	0	0	0	0	0	0	62.0016	1	1	46.5243	37.625
DATA	381	5	41	0	0	A_43_P13508	NM_001015031	10894.7	213.417	3.956684e+001	5.126301e+000	107	34	1.035199e+001	0	0	0	0	0	0	37.0329	1	1	48.5334	36.0541
DATA	382	5	42	0	0	A_64_P077426	XM_001080794	10919.7	213.643	1.723505e+004	1.723508e+003	15742	35	7.464446e+000	0	0	0	0	0	0	16196.2	1	1	51.4001	35.2222
DATA	383	5	43	0	0	A_44_P370175	NM_031773	10945.4	213.427	6.967183e+001	7.680925e+000	133	39	9.781048e+000	0	0	0	0	0	0	65.7338	1	1	57.5363	39.5143
DATA	384	5	44	0	0	A_64_P084288	NM_001000496	10970.6	213.427	1.019221e+001	3.378702e+000	81	39	9.016504e+000	0	0	0	0	0	0	9.65227	1	0	57.5363	39.7879
DATA	385	5	45	0	0	A_44_P400936	A_44_P400936	10996	213.455	4.158964e+002	4.171331e+001	469	39	1.514200e+001	0	0	0	0	0	0	395.295	1	1	55.8519	43.303
DATA	386	5	46	0	0	A_64_P019599	NM_012713	11021.4	213.64	2.754758e+002	2.773265e+001	332	35.5	1.020162e+001	0	0	0	0	0	0	262.735	1	1	48.8603	37.3889
DATA	387	5	47	0	0	A_44_P644356	AI556299	11046.7	213.5	2.315226e+001	3.940193e+000	95	39	9.106795e+000	0	0	0	0	0	0	22.1532	1	1	57.5363	36.6061
DATA	388	5	48	0	0	A_64_P057076	A_64_P057076	11072.1	213.91	1.237740e+002	1.277898e+001	188	32	9.426912e+000	0	0	0	0	0	0	118.798	1	1	46.1809	33
DATA	389	5	49	0	0	A_64_P087392	NM_001108764	11097.5	213.5	1.643972e+002	1.674245e+001	229.5	32.5	8.919113e+000	0	0	0	0	0	0	158.236	1	1	57.5363	33.6333
DATA	390	5	50	0	0	A_44_P436604	NM_001025627	11122.9	213.5	3.803519e+001	4.945652e+000	111	35	8.363001e+000	0	0	0	0	0	0	36.706	1	1	56.9804	35.8387
DATA	391	5	51	0	0	A_43_P23200	NM_001107832	11148.1	213.826	5.218342e+002	5.227863e+001	591	40	1.236419e+001	0	0	0	0	0	0	504.799	1	1	46.8651	39.8387
DATA	392	5	52	0	0	A_42_P515876	NM_031097	11173.7	213.652	7.241245e+002	7.248079e+001	767	36	9.377392e+000	0	0	0	0	0	0	702.007	1	1	47.2035	36
DATA	393	5	53	0	0	A_44_P1047924	NM_053523	11199.2	213.899	4.023878e+003	4.024001e+002	3893.5	37.5	1.066001e+001	0	0	0	0	0	0	3908.44	1	1	46.5243	38.625
DATA	394	5	54	0	0	A_44_P682668	NM_001014228	11224.5	213.5	1.198079e+002	1.238434e+001	188.5	39	1.133834e+001	0	0	0	0	0	0	116.558	1	1	65	39.9714
DATA	395	5	55	0	0	A_64_P061489	NM_001108746	11249.9	213.5	2.262417e+001	3.863219e+000	95	44	6.579662e+000	0	0	0	0	0	0	22.0405	1	1	56.9804	43.4667
DATA	396	5	56	0	0	A_64_P047747	NM_182474	11275.1	214.175	1.259451e+003	1.259840e+002	1289	35	9.639636e+000	0	0	0	0	0	0	1228.31	1	1	45.4864	36.5484
DATA	397	5	57	0	0	A_64_P091163	NM_001107083	11300.7	213.583	4.014607e+001	5.087864e+000	108.5	34	8.471792e+000	0	0	0	0	0	0	39.1836	1	1	48.5334	35.7667
DATA	398	5	58	0	0	A_64_P133992	NM_001008825	11326.1	213.5	6.939996e+001	7.610736e+000	139.5	36	8.245807e+000	0	0	0	0	0	0	67.7692	1	1	56.9804	36.92
DATA	399	5	59	0	0	A_42_P503768	NM_001009466	11351.4	213.958	3.597825e+002	3.611357e+001	419	39.5	8.417551e+000	0	0	0	0	0	0	351.401	1	1	48.2044	39.8
DATA	400	5	60	0	0	A_44_P400346	ENSRNOT00000059540	11376.5	214.231	6.321868e+001	7.051516e+000	136	34	7.936357e+000	0	0	0	0	0	0	61.7392	1	1	46.1809	34.2963
DATA	401	5	61	0	0	A_64_P128438	NM_012591	11402.4	214.129	2.640173e+003	2.640358e+002	2625	44	1.137320e+001	0	0	0	0	0	0	2577.2	1	1	47.2035	41.2759
DATA	402	5	62	0	0	A_44_P531758	NM_012935	11427.6	213.573	3.623414e+004	3.623415e+003	35112	43	3.006149e+001	0	0	0	0	1	0	35341.5	1	1	57.5363	52.7143
DATA	403	5	63	0	0	A_43_P10257	NM_203335	11453.1	214.261	4.436555e+003	4.436665e+002	4437	28	7.477361e+000	0	0	0	0	1	0	4322.6	1	1	46.1809	28.1714
DATA	404	5	64	0	0	A_64_P011744	NM_001108789	11478.5	213.648	1.761685e+002	1.789375e+001	241.5	27	7.462880e+000	0	0	0	0	1	0	171.389	1	1	57.5363	28.8621
DATA	405	5	65	0	0	A_44_P282794	NM_001107523	11503.6	213.573	7.754622e+001	8.366722e+000	141.5	29.5	1.114982e+001	0	0	0	0	0	0	75.3081	1	1	57.5363	30.9375
DATA	406	5	66	0	0	A_42_P463784	NM_001008526	11529.1	214.175	1.220272e+003	1.220678e+002	1266.5	35	1.121214e+001	0	0	0	0	0	0	1182.55	1	1	45.4864	35.0465
DATA	407	5	67	0	0	A_42_P630463	NM_022238	11554.6	214.313	4.642705e+002	4.653418e+001	527	32	9.238885e+000	0	0	0	0	0	0	448.791	1	1	44.4243	33.9032
DATA	408	5	68	0	0	A_64_P006728	NM_001108905	11579.9	214.328	2.926029e+003	2.926200e+002	2979.5	35	2.134168e+001	0	0	0	0	0	0	2820.43	1	1	45.1352	42.0571
DATA	409	5	69	0	0	A_44_P360629	NM_001000030	11606.3	213.63	5.211180e+002	5.220848e+001	556.5	37.5	2.211389e+001	0	1	0	0	0	0	500.598	1	1	39.0882	43.9474
DATA	410	5	70	0	0	A_64_P024620	NM_001006995	11630.8	214	1.207699e+004	1.207703e+003	10583	34	1.324514e+001	0	1	0	0	0	0	11561.5	1	1	46.8651	34.9394
DATA	411	5	71	0	0	A_64_P091194	ENSRNOT00000049254	11656	214	1.675990e+004	1.675993e+003	15939	39.5	1.503382e+001	0	0	0	0	0	0	15981.3	1	1	46.8651	41.6429
DATA	412	5	72	0	0	A_44_P334922	NM_022379	11681.4	214.317	1.284680e+001	3.460432e+000	85	41	1.177049e+001	0	0	0	0	0	0	12.1972	1	0	44.4243	43.1875
DATA	413	5	73	0	0	A_42_P482051	XM_001059157	11706.9	214.057	1.969876e+003	1.970140e+002	1899	39.5	1.056318e+001	0	0	0	0	0	0	1861.36	1	1	46.8651	39.1071
DATA	414	5	74	0	0	A_42_P674742	XM_002726367	11732.3	214.03	7.580268e+003	7.580338e+002	7014	44	1.190420e+001	0	0	0	0	0	0	7126.22	1	1	45.835	42.28
DATA	415	5	75	0	0	A_64_P105211	XM_233310	11757.3	214.19	2.846572e+001	4.329849e+000	102	38	8.623779e+000	0	0	0	0	0	0	26.6164	1	1	44.7812	38.75
DATA	416	5	76	0	0	A_64_P058523	NM_134385	11783.4	214.069	4.802901e+000	3.317339e+000	79	31	6.707142e+000	0	0	0	0	0	0	4.46382	1	0	53.8203	31.2963
DATA	417	5	77	0	0	A_44_P586876	NM_001100805	11808.3	214.333	1.526452e+003	1.526809e+002	1442	35.5	5.624658e+000	0	0	0	0	0	0	1410.02	1	1	46.8651	35.8667
DATA	418	5	78	66	1	DarkCorner	DarkCorner	11833.9	214.065	3.336705e+000	3.324873e+000	66	36	5.907895e+000	0	0	0	0	0	0	-7.25151	0	0	54.4085	37.5
DATA	419	5	79	66	1	DarkCorner	DarkCorner	11859.5	214.446	3.360290e+000	3.348374e+000	72	36.5	7.477108e+000	0	0	0	0	0	0	-3.84987	0	0	49.1849	35.9167
DATA	420	5	80	66	1	DarkCorner	DarkCorner	11884.6	214.427	3.385108e+000	3.373104e+000	73	31	1.050622e+001	0	0	0	0	0	0	-1.8407	0	0	57.5363	35.7742
DATA	421	5	81	66	1	DarkCorner	DarkCorner	11910.1	214.386	3.411835e+000	3.399736e+000	69	32.5	1.147049e+001	0	0	0	0	0	0	-5.43321	0	0	57.259	33.9412
DATA	422	5	82	66	1	DarkCorner	DarkCorner	11935	214.507	3.439355e+000	3.427158e+000	74	35	8.175494e+000	0	0	0	0	0	0	-0.162836	0	0	48.5334	35.25
DATA	423	5	83	66	1	DarkCorner	DarkCorner	11960.5	213.816	3.469532e+000	3.457279e+000	75	35.5	1.011767e+001	0	0	0	0	0	0	0.165249	0	0	49.1849	36.2353
DATA	424	5	84	66	1	DarkCorner	DarkCorner	11986	214.368	3.500673e+000	3.488259e+000	73	37	9.214220e+000	0	0	0	0	0	0	-2.7932	0	0	49.1849	38.0238
DATA	425	5	85	66	1	DarkCorner	DarkCorner	12011.3	214.521	4.416518e+000	3.548597e+000	79	31.5	7.836490e+000	0	0	0	0	0	0	3.82654	1	0	47.8731	32.1667
DATA	426	6	1	66	1	DarkCorner	DarkCorner	9891.32	219.531	3.556794e+000	3.544181e+000	65	36	8.390318e+000	0	0	0	0	0	0	-2.59229	0	0	51.0895	35.75
DATA	427	6	2	66	1	DarkCorner	DarkCorner	9916.39	219.937	3.574227e+000	3.561552e+000	60	34	9.206336e+000	0	0	0	0	0	0	-8.37417	0	0	50.1463	34.3571
DATA	428	6	3	66	1	DarkCorner	DarkCorner	9942.05	219.95	3.589674e+000	3.576944e+000	63	36.5	8.916927e+000	0	0	0	0	0	0	-5.4264	0	0	50.1463	35.0588
DATA	429	6	4	66	1	DarkCorner	DarkCorner	9967.49	220	3.602745e+000	3.589969e+000	57	34.5	8.422807e+000	0	0	0	0	0	0	-9.65665	0	0	48.5334	33.4333
DATA	430	6	5	66	1	DarkCorner	DarkCorner	9992.62	219.919	3.613509e+000	3.600694e+000	59	35	1.042288e+001	0	0	0	0	0	0	-9.14735	0	0	49.1849	36
DATA	431	6	6	66	1	DarkCorner	DarkCorner	10018	220.479	3.622370e+000	3.609524e+000	60	35	8.757888e+000	0	0	0	0	0	0	-7.80643	0	0	47.5395	34.5938
DATA	432	6	7	66	1	DarkCorner	DarkCorner	10043.6	220.286	3.629217e+000	3.616347e+000	59	34	8.670997e+000	0	0	0	0	0	0	-8.35907	0	0	47.5395	35.3784
DATA	433	6	8	66	1	DarkCorner	DarkCorner	10069.4	219.573	3.634073e+000	3.621186e+000	63.5	32	8.373408e+000	0	0	0	0	0	0	-6.32757	0	0	57.5363	33.037
DATA	434	6	9	0	0	A_64_P034324	NM_001108282	10094.5	219.986	5.877825e+001	6.905326e+000	114	39	1.017830e+001	0	0	0	0	0	0	49.4766	1	1	47.8731	36.7419
DATA	435	6	10	0	0	A_64_P071506	ENSRNOT00000025007	10120	220	2.057393e+001	4.168539e+000	85	37.5	1.117150e+001	0	0	0	0	0	0	17.3121	1	1	54.9904	36.8125
DATA	436	6	11	0	0	A_64_P050705	NM_001106061	10145.5	220	1.696621e+002	1.734915e+001	210.5	36	8.379146e+000	0	0	0	0	0	0	142.779	1	1	54.1152	35.7143
DATA	437	6	12	0	0	A_64_P032242	NM_001008898	10170.9	219.961	1.114071e+001	3.790464e+000	79	38	6.636097e+000	0	0	0	0	0	0	9.38063	1	0	47.2035	38.7436
DATA	438	6	13	0	0	A_42_P730320	NM_001013877	10196.5	220	7.125284e+001	7.991923e+000	127	41	9.580486e+000	0	0	0	0	0	0	60.0538	1	1	54.1152	40
DATA	439	6	14	0	0	A_64_P123073	A_64_P123073	10221.1	220.197	2.719896e+002	2.743813e+001	298	40	1.242485e+001	0	0	0	0	0	0	229.537	1	1	46.8651	41.6552
DATA	440	6	15	0	0	A_64_P064709	NM_001166303	10246.8	220.206	1.042162e+002	1.102871e+001	152	36	9.534281e+000	0	0	0	0	0	0	88.1018	1	1	46.1809	35.7429
DATA	441	6	16	0	0	A_44_P123381	NM_013012	10272.3	220.219	1.361912e+001	3.850182e+000	81	38	8.538460e+000	0	0	0	0	0	0	11.5368	1	0	45.1352	37.9697
DATA	442	6	17	0	0	A_44_P557487	NM_053617	10297.5	220.422	1.697392e+001	3.973620e+000	84	33	7.255879e+000	0	0	0	0	0	0	14.4124	1	0	44.7812	31.8276
DATA	443	6	18	0	0	A_64_P084971	NM_017007	10323.4	220.404	4.105344e+004	4.105346e+003	34990	36	9.218397e+000	0	0	0	0	0	0	34952.7	1	1	57.8122	36.3571
DATA	444	6	19	0	0	A_42_P770556	NM_033096	10348.4	220.468	6.658148e+003	6.658244e+002	5655	37	7.919978e+000	0	0	0	0	0	0	5685.14	1	1	49.8279	37.7429
DATA	445	6	20	0	0	A_64_P023381	XM_001073278	10373.9	220.386	7.046077e+001	7.894979e+000	132	37	6.748605e+000	0	0	0	0	0	0	60.356	1	1	65	37.1765
DATA	446	6	21	0	0	A_64_P059217	NM_053667	10399.4	220.427	4.200324e+002	4.215292e+001	434	46	1.246534e+001	0	0	0	0	0	0	361.032	1	1	57.5363	46.6667
DATA	447	6	22	0	0	A_44_P286215	NM_001008885	10424.6	220.63	2.058799e+002	2.088951e+001	244	35.5	8.900970e+000	0	0	0	0	0	0	177.598	1	1	48.2044	36.5
DATA	448	6	23	0	0	A_64_P138056	A_64_P138056	10450	220.824	7.052718e+002	7.061511e+001	680.5	34.5	7.043177e+000	0	0	0	0	0	0	610.715	1	1	46.8651	35.2222
DATA	449	6	24	0	0	A_44_P280799	NM_001000654	10475.5	220.352	1.280951e+001	3.735453e+000	79.5	36	5.140323e+000	0	0	0	0	0	0	11.1365	1	0	57.5363	34.8261
DATA	450	6	25	0	0	A_64_P111599	NM_001191586	10500.7	220.373	4.907064e+002	4.919491e+001	495	36	1.136662e+001	0	0	0	0	0	0	428.372	1	1	46.1809	38
DATA	451	6	26	0	0	A_64_P088635	ENSRNOT00000059643	10526.4	220.427	2.065914e+001	4.046629e+000	88	36	1.279232e+001	0	0	0	0	0	0	18.1127	1	1	57.5363	36.4118
DATA	452	6	27	0	0	A_64_P042332	NM_021860	10551.6	220.427	1.057863e+001	3.622396e+000	80	34	1.159199e+001	0	0	0	0	0	0	9.31501	1	0	65	37.1786
DATA	453	6	28	0	0	A_42_P599080	NM_053753	10577	220.455	7.726583e+001	8.461435e+000	139	31	8.225452e+000	0	0	0	0	0	0	68.3414	1	1	65	33.4839
DATA	454	6	29	0	0	A_44_P576954	NM_001106645	10602.4	220.427	3.893050e+002	3.908161e+001	401	38.5	1.039509e+001	0	0	0	0	0	0	345.908	1	1	57.5363	38.3333
DATA	455	6	30	0	0	A_64_P046687	A_64_P046687	10627.4	220.705	3.093594e+003	3.093783e+002	2794	38.5	6.769098e+000	0	0	0	0	0	0	2761.22	1	1	52.3208	38.2
DATA	456	6	31	0	0	A_42_P694928	NM_001109046	10653	220.787	3.741497e+002	3.756931e+001	414.5	36	7.680888e+000	0	0	0	0	0	0	335.519	1	1	48.5334	37.2174
DATA	457	6	32	0	0	A_64_P032811	NM_001134575	10678.3	221.015	7.227109e+001	7.981051e+000	138	34	8.574363e+000	0	0	0	0	0	0	65.1104	1	1	46.1809	34.6552
DATA	458	6	33	0	0	A_64_P141070	ENSRNOT00000058701	10704	220.455	7.015201e+001	7.782765e+000	134.5	38	9.480453e+000	0	0	0	0	0	0	63.5001	1	1	55.8519	38.3429
DATA	459	6	34	0	0	A_64_P093462	NM_001108129	10729.4	220.729	1.376926e+004	1.376930e+003	12116.5	36	9.503480e+000	0	0	0	0	0	0	12521.8	1	1	47.5395	37.129
DATA	460	6	35	0	0	A_42_P799306	ENSRNOT00000015782	10754.6	220.63	6.001802e+001	6.868162e+000	128	39	7.459744e+000	0	0	0	0	0	0	54.8323	1	1	48.2044	35.8276
DATA	461	6	36	0	0	A_42_P726743	NM_001108985	10780.1	220.776	1.262752e+003	1.263190e+002	1239	36.5	9.946429e+000	0	0	0	0	0	0	1158.96	1	1	45.835	36.6875
DATA	462	6	37	0	0	A_44_P228341	NM_001025701	10805.6	220.897	2.194048e+003	2.194297e+002	2075	36.5	1.070871e+001	0	0	0	0	0	0	2022.89	1	1	46.5243	37.9688
DATA	463	6	38	0	0	A_42_P571433	NM_031059	10831	221.226	9.124314e+003	9.124373e+002	8129	37	6.619310e+000	0	0	0	0	0	0	8450.18	1	1	45.4864	37.6207
DATA	464	6	39	0	0	A_44_P132783	NM_214833	10856.2	221.234	1.213550e+002	1.257090e+001	183	37	5.637814e+000	0	0	0	0	0	0	112.877	1	1	45.1352	36.5806
DATA	465	6	40	0	0	A_44_P119215	NM_001108941	10881.3	221.274	4.837047e+001	5.836410e+000	118	34	1.097612e+001	0	0	0	0	0	0	45.1813	1	1	47.5395	35.8947
DATA	466	6	41	0	0	A_44_P124259	XM_345871	10907.3	220.5	3.421975e+001	4.720883e+000	102	34	1.010035e+001	0	0	0	0	0	0	32.0991	1	1	65	36.2727
DATA	467	6	42	0	0	A_44_P422063	NM_001107631	10932.6	220.645	1.170567e+002	1.214559e+001	179	37	1.053467e+001	0	0	0	0	0	0	110.242	1	1	49.8279	38.6667
DATA	468	6	43	0	0	A_44_P1033023	NM_013063	10957.9	220.896	8.750464e+003	8.750523e+002	7920	43	7.904100e+000	0	0	0	0	0	0	8272.95	1	1	46.8651	41.9063
DATA	469	6	44	0	0	A_64_P121618	NM_001134542	10983.3	221.015	2.179710e+002	2.203289e+001	278.5	38	7.325754e+000	0	0	0	0	0	0	206.842	1	1	46.1809	39
DATA	470	6	45	0	0	A_64_P042188	ENSRNOT00000034890	11008.9	221.175	7.979037e+003	7.979101e+002	7705	37	1.083118e+001	0	0	0	0	0	0	7598.88	1	1	45.4864	38.5758
DATA	471	6	46	0	0	A_42_P561616	AI234869	11034.2	221.179	6.375052e+002	6.383041e+001	680	36.5	8.832215e+000	0	0	0	0	0	0	609.163	1	1	46.1809	36.8529
DATA	472	6	47	0	0	A_42_P588606	NM_001134544	11059.3	221.145	1.814784e+002	1.842480e+001	241	36.5	1.001729e+001	0	0	0	0	0	0	173.955	1	1	46.5243	36.1154
DATA	473	6	48	0	0	A_42_P568897	NM_001005563	11084.7	221.222	7.793310e+002	7.799767e+001	818	35.5	1.065972e+001	0	0	0	0	0	0	749.247	1	1	47.2035	36
DATA	474	6	49	0	0	A_64_P096356	NM_012640	11110.4	220.573	2.449182e+004	2.449184e+003	25075	32	7.450915e+000	0	0	0	0	0	0	23611.4	1	1	57.5363	33.129
DATA	475	6	50	0	0	A_64_P006418	A_64_P006418	11135.5	220.853	3.725565e+003	3.725699e+002	3841.5	40	1.103338e+001	0	0	0	0	0	0	3600.63	1	1	49.8279	39.5714
DATA	476	6	51	0	0	A_64_P156389	A_64_P156389	11160.9	220.881	6.460289e+001	7.187028e+000	131	33.5	9.528903e+000	0	0	0	0	0	0	62.5795	1	1	46.8651	34.6667
DATA	477	6	52	0	0	A_42_P576446	NM_001107673	11186.6	221.239	8.351304e+003	8.351363e+002	8053.5	34	7.355216e+000	0	0	0	0	0	0	8106.47	1	1	46.5243	35.1071
DATA	478	6	53	0	0	A_64_P022804	A_64_P022804	11211.6	221.265	1.166172e+003	1.166594e+002	1180	35.5	9.482725e+000	0	0	0	0	0	0	1133.97	1	1	46.5243	35.7273
DATA	479	6	54	0	0	A_64_P162356	A_64_P162356	11237.3	221.222	9.711517e+003	9.711568e+002	9393	38	1.028468e+001	0	0	0	0	0	0	9457.8	1	1	45.1352	38.4103
DATA	480	6	55	0	0	A_44_P266776	NM_199388	11262.6	221.103	9.569444e+002	9.574557e+001	984	37.5	1.078033e+001	0	0	0	0	0	0	933.086	1	1	46.5243	38.2917
DATA	481	6	56	0	0	A_64_P035066	NM_001008960	11287.5	221.349	3.699303e+000	3.147513e+000	73	36.5	1.087319e+001	0	0	0	0	0	0	3.61049	1	0	44.4243	38.3214
DATA	482	6	57	0	0	A_64_P072728	NM_001100667	11313.3	220.971	6.801397e+003	6.801469e+002	6791	34	8.423106e+000	0	0	0	0	0	0	6642.44	1	1	46.1809	35.4444
DATA	483	6	58	0	0	A_64_P028446	NM_001106007	11338.7	221.1	2.690405e+003	2.690587e+002	2781.5	38	6.368311e+000	0	0	0	0	0	0	2628.48	1	1	47.2035	39.3462
DATA	484	6	59	0	0	A_44_P251212	NM_031715	11364.5	221	4.079313e+004	4.079314e+003	39912	36.5	7.085522e+000	0	0	0	0	0	0	39855.8	1	1	54.1152	36.2692
DATA	485	6	60	0	0	A_42_P818240	NM_001108334	11389.5	221	1.933788e+004	1.933791e+003	18657	35	6.651419e+000	0	0	0	0	0	0	18888.5	1	1	48.5334	36.7931
DATA	486	6	61	0	0	A_64_P023122	NM_001080208	11415	221	2.844213e+001	4.225607e+000	97	44	1.422720e+001	0	0	0	0	0	0	27.7646	1	1	65	44.5185
DATA	487	6	62	0	0	A_44_P217821	NM_001107292	11440.3	221.221	3.552451e+002	3.566196e+001	414	41	3.079065e+001	0	0	0	0	1	0	346.468	1	1	48.8603	51.2759
DATA	488	6	63	0	0	A_64_P007372	NM_001105895	11466.1	219.455	1.024364e+002	1.238789e+001	163.5	27	6.393105e+000	0	0	0	0	1	0	99.7672	1	1	36.1258	27.5
DATA	489	6	64	0	0	A_42_P792382	NM_017257	11491.3	221.408	4.049141e+003	4.049262e+002	3958	27	6.880407e+000	0	0	0	1	1	0	3937.84	1	1	47.8731	28.44
DATA	490	6	65	0	0	A_43_P12232	NM_022512	11516.5	221.427	1.068575e+003	1.069037e+002	1092	29	8.821512e+000	0	0	0	0	1	0	1037.19	1	1	49.1849	29.6176
DATA	491	6	66	0	0	A_64_P158475	A_64_P158475	11541.9	221.227	4.804888e+003	4.804991e+002	4904.5	37	1.383043e+001	0	0	0	0	0	0	4653	1	1	45.835	39.1471
DATA	492	6	67	0	0	A_64_P043361	NM_001197023	11567.4	221.427	1.059870e+002	1.105935e+001	165	33	1.599084e+001	0	0	0	0	0	0	102.364	1	1	57.5363	37.2759
DATA	493	6	68	0	0	A_64_P080851	NM_001105753	11592.6	221.427	7.765571e+001	8.386945e+000	141	34	2.346659e+001	0	0	0	0	0	0	74.7773	1	1	57.5363	42.4706
DATA	494	6	69	0	0	A_44_P129330	NM_001107505	11618.1	221.386	7.288725e+002	7.295654e+001	712	33	1.133347e+001	0	0	0	0	0	0	699.472	1	1	57.259	32.6757
DATA	495	6	70	0	0	A_64_P008827	NM_001014012	11643.8	221.375	1.625231e+003	1.625544e+002	1562	33	1.181879e+001	0	0	0	0	0	0	1553.75	1	1	47.8731	35.0606
DATA	496	6	71	0	0	A_64_P026222	NM_001101019	11668.6	221.427	6.864741e+001	7.575585e+000	136	42.5	1.332234e+001	0	0	0	0	0	0	65.3644	1	1	57.5363	45.2692
DATA	497	6	72	0	0	A_64_P067749	NM_012659	11694.4	221.427	3.884330e+004	3.884331e+003	37774	40	1.166044e+001	0	0	0	0	0	0	36816.5	1	1	57.5363	40.1818
DATA	498	6	73	0	0	A_44_P362981	NM_145878	11719.6	221.427	3.454618e+004	3.454620e+003	31541	40	1.214692e+001	0	0	0	0	0	0	32585.5	1	1	57.5363	39.619
DATA	499	6	74	0	0	A_64_P146654	NM_031698	11744.7	221.593	2.683654e+003	2.683851e+002	2565	40	9.715476e+000	0	0	0	0	0	0	2518.22	1	1	51.0895	39.0952
DATA	500	6	75	0	0	A_42_P548800	NM_001007696	11770.4	221.477	5.582615e+003	5.582711e+002	5276.5	32	7.514144e+000	0	0	0	0	0	0	5208.57	1	1	45.4864	33.9355
DATA	501	6	76	0	0	A_44_P310581	BG673348	11795.8	221.621	3.888476e+003	3.888615e+002	3639	35.5	1.279103e+001	0	0	0	0	0	0	3606.18	1	1	45.4864	38.9091
DATA	502	6	77	0	0	A_64_P062269	XM_001067531	11821.1	222	1.619483e+002	1.652971e+001	224	37.5	6.471107e+000	0	0	0	0	0	0	149.242	1	1	46.8651	38.0588
DATA	503	6	78	66	1	DarkCorner	DarkCorner	11846.5	221.5	3.345083e+000	3.333221e+000	67	37	6.137073e+000	0	0	0	0	0	0	-7.27608	0	0	57.5363	36.9459
DATA	504	6	79	66	1	DarkCorner	DarkCorner	11872	221.455	4.343014e+000	3.385388e+000	77	37	1.111793e+001	0	0	0	0	0	0	3.9462	1	0	55.8519	37.2571
DATA	505	6	80	66	1	DarkCorner	DarkCorner	11897.5	221.5	3.395108e+000	3.383069e+000	65	36	1.016951e+001	0	0	0	0	0	0	-9.98573	0	0	57.5363	36.4324
DATA	506	6	81	66	1	DarkCorner	DarkCorner	11922.7	221.5	3.422043e+000	3.409908e+000	73	35	9.117181e+000	0	0	0	0	0	0	-2.57034	0	0	57.5363	35.2941
DATA	507	6	82	66	1	DarkCorner	DarkCorner	11948.1	221.488	3.450852e+000	3.438615e+000	69.5	34	1.050570e+001	0	0	0	0	0	0	-5.69298	0	0	50.4627	36.5714
DATA	508	6	83	66	1	DarkCorner	DarkCorner	11973.8	221.838	3.481270e+000	3.468924e+000	73	34	9.130156e+000	0	0	0	0	0	0	-2.16402	0	0	48.5334	35.122
DATA	509	6	84	66	1	DarkCorner	DarkCorner	11998.8	221.794	3.512800e+000	3.500343e+000	73	35	9.137833e+000	0	0	0	0	0	0	-3.23312	0	0	46.1809	35
DATA	510	6	85	66	1	DarkCorner	DarkCorner	12024.3	221.417	8.545320e+000	3.636002e+000	80	33	8.686376e+000	0	0	0	1	0	0	7.37624	1	0	48.5334	33.4096
DATA	511	7	1	66	1	DarkCorner	DarkCorner	9878.5	227	3.548358e+000	3.535775e+000	67	31	8.359394e+000	0	0	0	0	0	0	-1.92654	0	0	54.1152	32.1989
DATA	512	7	2	66	1	DarkCorner	DarkCorner	9904.39	227.069	3.567366e+000	3.554715e+000	67	39	7.576214e+000	0	0	0	0	0	0	-3.81407	0	0	53.8203	36.5517
DATA	513	7	3	66	1	DarkCorner	DarkCorner	9928.76	227.542	3.583102e+000	3.570396e+000	61.5	37	1.063905e+001	0	0	0	0	0	0	-5.01207	0	0	47.8731	35.5758
DATA	514	7	4	66	1	DarkCorner	DarkCorner	9953.94	227.231	3.597047e+000	3.584291e+000	58	34.5	9.430573e+000	0	0	0	0	0	0	-8.34281	0	0	49.5074	32.9167
DATA	515	7	5	66	1	DarkCorner	DarkCorner	9980.21	227.4	3.609371e+000	3.596571e+000	58	34.5	9.673233e+000	0	0	0	0	0	0	-9.6231	0	0	47.2035	34.6429
DATA	516	7	6	66	1	DarkCorner	DarkCorner	10005.7	227.775	3.619163e+000	3.606328e+000	58.5	37	1.158159e+001	0	0	0	0	0	0	-10.0072	0	0	50.7771	38.2667
DATA	517	7	7	66	1	DarkCorner	DarkCorner	10031	227.506	3.626807e+000	3.613945e+000	59	32	7.603273e+000	0	0	0	0	0	0	-10.2466	0	0	51.0895	32.878
DATA	518	7	8	66	1	DarkCorner	DarkCorner	10056.8	227.591	3.632611e+000	3.619729e+000	62	36.5	5.158362e+000	0	0	0	0	0	0	-6.31307	0	0	45.835	35.5
DATA	519	7	9	0	0	A_64_P051297	NM_001107416	10081.6	227.13	4.184674e+003	4.184831e+002	3601	32	1.009509e+001	0	0	0	0	0	0	3523.18	1	1	46.8651	31.9714
DATA	520	7	10	0	0	A_64_P162378	A_64_P162378	10107.4	227.427	6.268933e+004	6.268935e+003	53267	37	9.017764e+000	0	0	0	0	0	0	52749.2	1	1	57.5363	36.1515
DATA	521	7	11	0	0	A_64_P030634	ENSRNOT00000042606	10132.5	227.5	1.082445e+002	1.141559e+001	156	33.5	7.690697e+000	0	0	0	0	0	0	91.0724	1	1	46.5243	33.9643
DATA	522	7	12	0	0	A_64_P110009	NM_024392	10158.1	227.268	9.443458e+003	9.443528e+002	7831	36	6.366252e+000	0	0	0	0	0	0	7948.15	1	1	47.5395	36.1053
DATA	523	7	13	0	0	A_42_P618145	NM_001080783	10183.5	227.5	3.547120e+003	3.547305e+002	3031	38.5	7.886007e+000	0	0	0	0	0	0	2987.76	1	1	49.1849	38.625
DATA	525	7	15	0	0	A_64_P101770	NM_001000074	10234.4	227.427	9.621552e+000	3.737914e+000	76	38	1.008233e+001	0	0	0	0	0	0	8.12634	1	0	65	37.1818
DATA	526	7	16	0	0	A_42_P735934	NM_001105729	10259.3	227.662	5.379923e+003	5.380044e+002	4834	35.5	8.504848e+000	0	0	0	0	0	0	4552.3	1	1	48.5334	34.9706
DATA	528	7	18	0	0	A_42_P718331	NM_133522	10310.4	227.763	2.251252e+003	2.251538e+002	1936	33	8.142198e+000	0	0	0	0	0	0	1914.03	1	1	49.1849	34.1538
DATA	529	7	19	0	0	A_64_P118054	NM_001037651	10335.7	227.5	2.659270e+001	4.458100e+000	93.5	36	8.308048e+000	0	0	0	0	0	0	22.6726	1	1	65	34.9032
DATA	530	7	20	0	0	A_64_P044613	A_64_P044613	10361.3	227.5	7.395101e+004	7.395102e+003	66708.5	37	6.374644e+000	0	0	0	0	0	0	63245.5	1	1	57.5363	37.4063
DATA	531	7	21	0	0	A_43_P13241	NM_134334	10386.5	227.5	3.742393e+004	3.742395e+003	31734	39.5	1.099797e+001	0	0	0	0	0	0	32111.5	1	1	57.5363	42.3462
DATA	532	7	22	0	0	A_44_P524748	NM_001000712	10411.9	227.5	1.587036e+001	3.882044e+000	81	39	1.150228e+001	0	0	0	0	0	0	13.6657	1	0	56.9804	41.1429
DATA	533	7	23	0	0	A_64_P126797	ENSRNOT00000048363	10436.6	228.042	1.047321e+002	1.105210e+001	157.5	35	8.643669e+000	0	0	0	0	0	0	90.5112	1	1	47.8731	36.8824
DATA	535	7	25	0	0	A_42_P730411	NM_001012181	10488.1	227.418	6.838622e+002	6.847580e+001	675	38	1.105959e+001	0	0	0	0	0	0	595.797	1	1	46.1809	40.5588
DATA	536	7	26	0	0	A_64_P049501	NM_001047970	10513.5	227.5	5.496111e+001	6.508880e+000	117.5	37	1.066058e+001	0	0	0	0	0	0	48.0853	1	1	57.5363	37.5588
DATA	537	7	27	0	0	A_42_P623688	NM_031031	10538.8	227.72	6.628360e+003	6.628451e+002	5725	36.5	1.250790e+001	0	0	0	0	0	0	5824.21	1	1	49.1849	37.4375
DATA	538	7	28	0	0	A_42_P601217	NM_053460	10564.3	227.778	1.563644e+002	1.601391e+001	207	36	1.115090e+001	0	0	0	0	0	0	138.006	1	1	47.5395	38.25
DATA	540	7	30	0	0	A_42_P791872	NM_001135174	10615.1	228.057	9.492948e+003	9.493010e+002	8276	37	7.832198e+000	0	0	0	0	0	0	8455.06	1	1	46.8651	36.52
DATA	542	7	32	0	0	A_44_P557172	NM_177936	10665.4	228.239	7.336092e+001	8.083056e+000	136	34	8.893320e+000	0	0	0	0	0	0	65.9444	1	1	47.5395	36.3448
DATA	543	7	33	0	0	A_64_P118812	NM_001000512	10691.4	227.573	4.263197e+000	3.404390e+000	73	38	6.295775e+000	0	0	0	0	0	0	3.85054	1	0	65	36.8667
DATA	544	7	34	0	0	A_64_P019425	NM_172035	10716.6	228.062	3.129340e+002	3.147348e+001	352	38	8.942243e+000	0	0	0	0	0	0	283.96	1	1	45.4864	37.3125
DATA	545	7	35	0	0	A_42_P726743	NM_001108985	10742.1	227.614	1.264441e+003	1.264884e+002	1233	38	8.708947e+000	0	0	0	0	0	0	1152.72	1	1	57.259	37.3438
DATA	546	7	36	0	0	A_42_P558703	NM_001106810	10767.3	227.9	4.368331e+002	4.381013e+001	465	32	8.959817e+000	0	0	0	0	0	0	400.066	1	1	47.2035	32.7241
DATA	547	7	37	0	0	A_42_P619806	TC590118	10792.9	228.222	8.159795e+002	8.166528e+001	832	35	1.095485e+001	0	0	0	0	0	0	750.755	1	1	45.4864	34.1389
DATA	548	7	38	0	0	A_64_P072247	XM_001055615	10818.4	227.573	4.675486e+001	5.723240e+000	113.5	36	7.490099e+000	0	0	0	0	0	0	43.2116	1	1	65	36.1111
DATA	549	7	39	0	0	A_64_P104164	A_64_P104164	10843.5	228	2.539842e+004	2.539845e+003	24442	35	6.755469e+000	0	0	0	0	0	0	23576.5	1	1	54.1152	36
DATA	550	7	40	0	0	A_42_P672103	NM_021770	10868.8	228.106	2.420321e+004	2.420323e+003	22161	37.5	1.062293e+001	0	0	0	0	0	0	22563.9	1	1	50.1463	37.4286
DATA	551	7	41	0	0	A_64_P090942	NM_001000406	10893.8	228.303	9.255812e+000	3.387586e+000	79	34	1.076744e+001	0	0	0	0	0	0	8.66493	1	0	45.835	35.6341
DATA	552	7	42	0	0	A_64_P149491	ENSRNOT00000025458	10919.4	228.029	1.286758e+002	1.327052e+001	190	35	6.737457e+000	0	0	0	0	0	0	120.958	1	1	47.5395	35.68
DATA	553	7	43	0	0	A_42_P552441	NR_002704	10944.9	228.104	2.015678e+004	2.015681e+003	18852	42	9.417141e+000	0	0	0	0	0	0	19023.1	1	1	46.8651	39.6429
DATA	554	7	44	0	0	A_64_P060419	ENSRNOT00000055060	10970.1	227.926	7.501328e+000	3.306500e+000	79	38	6.742630e+000	0	0	0	0	0	0	7.10619	1	0	46.8651	39.0345
DATA	555	7	45	0	0	A_44_P161233	NM_019165	10996.1	228.143	8.534974e+002	8.541001e+001	880	38	1.009809e+001	0	0	0	0	0	0	811.56	1	1	46.8651	38.973
DATA	556	7	46	66	-1	(-)3xSLv1	NegativeControl	11021.2	228.153	3.208715e+000	3.197336e+000	69	34.5	1.134698e+001	0	0	0	0	0	0	-3.55667	0	0	47.5395	37.7333
DATA	557	7	47	0	0	A_43_P12519	NM_031114	11046.8	228.212	1.131939e+004	1.131943e+003	10539.5	39.5	1.051660e+001	0	0	0	0	0	0	10835.8	1	1	45.835	39.4333
DATA	558	7	48	0	0	A_44_P317600	NM_012612	11072.1	228.471	4.796790e+002	4.807299e+001	534	42	1.310051e+001	0	0	0	0	0	0	460.603	1	1	47.8731	39.04
DATA	559	7	49	0	0	A_64_P034166	A_64_P034166	11097.5	228.352	7.907413e+000	3.265120e+000	81	35	8.312204e+000	0	0	0	0	0	0	7.6147	1	0	57.5363	35.9375
DATA	560	7	50	0	0	A_64_P024585	NM_001109337	11122.9	228.386	1.064140e+001	3.333932e+000	79	37	8.255501e+000	0	0	0	0	0	0	10.2747	1	0	65	36.7059
DATA	561	7	51	0	0	A_42_P654682	NM_012724	11148.3	228.527	2.947629e+001	4.315453e+000	99	37	1.068010e+001	0	0	0	0	0	0	28.5292	1	1	49.1849	37
DATA	562	7	52	0	0	A_42_P524610	NM_001108992	11173.9	228.377	2.386292e+003	2.386499e+002	2303	35.5	8.732579e+000	0	0	0	0	0	0	2314.67	1	1	46.8651	35.9643
DATA	563	7	53	0	0	A_64_P046677	NM_020093	11199.4	228.404	2.402136e+001	3.952661e+000	94	38	8.031804e+000	0	0	0	0	0	0	23.3453	1	1	57.8122	38.6522
DATA	564	7	54	0	0	A_64_P042742	XM_001061779	11224.2	228.052	3.870543e+002	3.883210e+001	446	37	8.900149e+000	0	0	0	0	0	0	376.767	1	1	42.9674	35.7632
DATA	565	7	55	0	0	A_64_P058430	ENSRNOT00000062073	11249.9	228.407	2.440176e+001	3.968413e+000	97	40	7.394638e+000	0	0	0	0	0	0	23.7869	1	1	56.9804	40.2857
DATA	566	7	56	0	0	A_42_P479251	NM_001108686	11275.3	228.465	9.619158e+003	9.619209e+002	9415	38.5	1.068793e+001	0	0	0	0	0	0	9387.21	1	1	47.8731	39.3333
DATA	567	7	57	0	0	A_42_P777329	NM_001106943	11300.6	228.258	5.920459e+002	5.928693e+001	650	34.5	1.034709e+001	0	0	0	0	0	0	578.237	1	1	46.1809	37.1071
DATA	568	7	58	0	0	A_64_P103414	NM_001106472	11326.1	228.477	9.114043e+000	3.252160e+000	83	36.5	7.015258e+000	0	0	0	0	0	0	8.90622	1	0	65	38.4231
DATA	569	7	59	0	0	A_64_P082164	A_64_P082164	11351.4	228.427	1.025011e+002	1.071478e+001	169.5	36.5	6.931189e+000	0	0	0	0	0	0	100.185	1	1	65	36.6
DATA	570	7	60	0	0	A_42_P702729	NM_001107557	11376.8	228.379	2.086869e+003	2.087102e+002	2055	35	7.534944e+000	0	0	0	0	0	0	2039.53	1	1	45.4864	36.1538
DATA	571	7	61	0	0	A_64_P130922	A_64_P130922	11402.3	228.465	4.309912e+002	4.321210e+001	485.5	35	9.408299e+000	0	0	0	0	0	0	421.042	1	1	47.8731	38.3667
DATA	572	7	62	0	0	A_42_P509843	NM_001100480	11427.7	228.535	7.140471e+002	7.147306e+001	764.5	39	1.201461e+001	0	0	0	0	0	0	697.052	1	1	47.8731	39.6875
DATA	573	7	63	0	0	A_64_P110759	A_64_P110759	11453.1	228.5	4.130208e+001	5.181256e+000	101	33	1.354553e+001	0	0	0	0	0	0	40.2758	1	1	65	35.825
DATA	574	7	64	0	0	A_64_P006235	A_64_P006235	11478.5	228.5	1.175583e+002	1.216610e+001	189	28	6.592968e+000	0	0	0	0	1	0	114.476	1	1	57.5363	28.0571
DATA	575	7	65	0	0	A_44_P506064	NM_001191778	11503.7	228.5	1.389660e+001	3.432151e+000	87	28.5	7.543339e+000	0	0	0	0	1	0	13.5088	1	0	57.5363	27.6471
DATA	576	7	66	0	0	A_64_P075425	A_64_P075425	11529.4	228.642	3.443798e+003	3.443942e+002	3348.5	34	1.038063e+001	0	0	0	0	0	0	3340.61	1	1	45.835	34
DATA	577	7	67	0	0	A_42_P544898	NM_001108279	11554.5	228.5	7.116750e+001	7.783749e+000	131	36	1.259915e+001	0	0	0	1	0	0	68.8671	1	1	57.5363	36.4615
DATA	578	7	68	0	0	A_44_P837192	ENSRNOT00000038251	11580	228.545	3.358596e+001	4.612482e+000	101	38	1.819527e+001	0	0	0	0	0	0	32.4088	1	1	55.8519	41.9667
DATA	580	7	70	0	0	A_44_P325657	NM_001014007	11630.8	228.735	1.581598e+002	1.613303e+001	218	26	8.977563e+000	0	0	0	0	1	0	151.597	1	1	46.1809	27.8571
DATA	581	7	71	0	0	A_64_P004598	ENSRNOT00000024034	11656.2	228.848	3.921478e+002	3.934474e+001	422	36.5	1.330811e+001	0	0	0	0	0	0	374.41	1	1	45.835	41.9286
DATA	582	7	72	0	0	A_42_P607183	XM_001081723	11681.7	229.029	1.453081e+003	1.453435e+002	1429	42	1.442653e+001	0	0	0	0	0	0	1381.44	1	1	46.8651	43.4839
DATA	584	7	74	0	0	A_42_P589190	NM_023104	11732.5	228.634	8.566732e+002	8.572858e+001	886	40	1.394076e+001	0	0	0	0	0	0	806.529	1	1	47.8731	42.15
DATA	585	7	75	0	0	A_42_P757323	TC587630	11757.6	228.614	4.139923e+003	4.140051e+002	3948	34.5	7.440327e+000	0	0	0	0	0	0	3876.78	1	1	52.9257	36.1071
DATA	586	7	76	0	0	A_42_P688320	NM_001108569	11783.4	228.573	2.910768e+002	2.929157e+001	347	31	6.706368e+000	0	0	0	0	0	0	270.969	1	1	57.5363	31.7586
DATA	587	7	77	0	0	A_44_P224705	NM_031002	11808.4	229.111	1.247959e+002	1.290772e+001	186	38	1.119122e+001	0	0	0	0	0	0	115.477	1	1	48.5334	42.08
DATA	588	7	78	0	0	A_42_P481849	NM_001100563	11833.7	228.887	1.785223e+003	1.785531e+002	1695	38	6.525147e+000	0	0	0	0	0	0	1641.09	1	1	49.8279	38.2941
DATA	589	7	79	66	1	DarkCorner	DarkCorner	11858.9	228.827	3.353452e+000	3.341560e+000	69	37	7.015828e+000	0	0	0	0	0	0	-4.03652	0	0	48.2044	36.1143
DATA	590	7	80	66	1	DarkCorner	DarkCorner	11884.1	228.639	3.378106e+000	3.366127e+000	69	31	1.014334e+001	0	0	0	0	0	0	-6.51118	0	0	48.2044	34.2286
DATA	591	7	81	66	1	DarkCorner	DarkCorner	11910.1	229	3.404710e+000	3.392636e+000	70	35.5	8.462549e+000	0	0	0	0	0	0	-4.61636	0	0	46.8651	34.225
DATA	592	7	82	66	1	DarkCorner	DarkCorner	11935.3	228.875	3.432301e+000	3.420129e+000	67	33.5	7.640068e+000	0	0	0	0	0	0	-7.29931	0	0	47.8731	32.5278
DATA	593	7	83	66	1	DarkCorner	DarkCorner	11960.9	228.963	3.461841e+000	3.449565e+000	68	34	8.494655e+000	0	0	0	0	0	0	-6.78546	0	0	50.1463	34.7027
DATA	594	7	84	66	1	DarkCorner	DarkCorner	11986.4	228.573	3.493128e+000	3.480740e+000	72	33	7.035089e+000	0	0	0	0	0	0	-3.24251	0	0	65	33.3226
DATA	595	7	85	66	1	DarkCorner	DarkCorner	12011.4	228.942	3.949148e+000	3.534555e+000	79	33.5	9.202079e+000	0	0	0	0	0	0	3.42996	1	0	46.5243	33.4412
DATA	596	8	1	66	1	DarkCorner	DarkCorner	9891.24	234.813	3.559260e+000	3.546638e+000	66	36	8.149924e+000	0	0	0	0	0	0	-3.85005	0	0	48.8603	35.3913
DATA	597	8	2	66	1	DarkCorner	DarkCorner	9916.42	234.961	3.576513e+000	3.563830e+000	62	38	6.554170e+000	0	0	0	0	0	0	-6.89391	0	0	49.1849	37.4286
DATA	598	8	3	66	1	DarkCorner	DarkCorner	9942.43	234.839	3.591927e+000	3.579189e+000	57.5	36	1.136590e+001	0	0	0	0	0	0	-8.58876	0	0	53.2255	35.0606
DATA	599	8	4	66	1	DarkCorner	DarkCorner	9967.55	234.864	3.604614e+000	3.591831e+000	59	32	1.016875e+001	0	0	0	0	0	0	-10.4843	0	0	45.835	32.9
DATA	600	8	5	66	1	DarkCorner	DarkCorner	9992.92	234.6	3.615262e+000	3.602442e+000	60	36	8.358972e+000	0	0	0	0	0	0	-8.91841	0	0	43.3362	36.7
DATA	601	8	6	66	1	DarkCorner	DarkCorner	10017.6	235.029	3.623707e+000	3.610857e+000	60.5	33	7.342907e+000	0	0	0	0	0	0	-8.9132	0	0	46.1809	33.4194
DATA	602	8	7	66	1	DarkCorner	DarkCorner	10044.1	234.807	3.630588e+000	3.617713e+000	59	32	5.730369e+000	0	0	0	0	0	0	-8.15631	0	0	51.0895	31.9737
DATA	603	8	8	0	0	A_44_P487081	NM_001033951	10069.1	235.143	5.455598e+002	5.467610e+001	522.5	33	1.092851e+001	0	0	0	0	0	0	459.46	1	1	45.4864	33.0323
DATA	604	8	9	0	0	A_64_P054403	NM_001170340	10094.5	234.5	2.760050e+002	2.783756e+001	305	34	9.287064e+000	0	0	0	0	0	0	232.266	1	1	57.5363	32.4118
DATA	605	8	10	0	0	A_44_P665685	NM_001109325	10120	234.545	2.097860e+001	4.189362e+000	87	35	8.919144e+000	0	0	0	0	0	0	17.6486	1	1	55.8519	35.6364
DATA	606	8	11	0	0	A_42_P531684	NM_001014215	10145.4	234.573	2.741793e+002	2.765662e+001	298	34	5.907895e+000	0	0	0	0	0	0	230.693	1	1	57.5363	34.3548
DATA	607	8	12	0	0	A_42_P722904	ENSRNOT00000006525	10170.9	235.156	2.413225e+003	2.413497e+002	2056.5	37.5	7.691832e+000	0	0	0	0	0	0	2031.65	1	1	45.4864	37.4167
DATA	608	8	13	0	0	A_42_P514057	NM_031839	10196.3	234.5	1.877809e+001	4.078054e+000	86.5	36	7.425258e+000	0	0	0	0	0	0	15.8247	1	1	57.5363	36.4286
DATA	609	8	14	0	0	A_64_P087459	A_64_P087459	10221.6	234.573	1.009753e+005	1.009753e+004	85322	36	9.580267e+000	0	0	0	0	0	0	85210.6	1	1	57.5363	37.5714
DATA	610	8	15	0	0	A_42_P581060	NM_001108722	10246.9	235.269	1.298508e+004	1.298513e+003	10923	38.5	1.013055e+001	0	0	0	0	0	0	10976.7	1	1	45.835	38.2188
DATA	611	8	16	0	0	A_42_P658220	NM_001109598	10272.2	235.024	2.475929e+003	2.476191e+002	2113	34	7.998062e+000	0	0	0	0	0	0	2097.32	1	1	51.0895	35.4651
DATA	612	8	17	0	0	A_42_P758454	NM_001108101	10297.7	235.188	2.524537e+002	2.549973e+001	277	35	7.151937e+000	0	0	0	0	0	0	214.363	1	1	46.5243	35.8261
DATA	613	8	18	0	0	A_64_P140956	NM_001013141	10322.9	235.123	4.357111e+002	4.371820e+001	426	35	7.521047e+000	0	0	0	0	0	0	370.954	1	1	46.1809	34.3846
DATA	614	8	19	0	0	A_42_P508984	NM_001007729	10348.5	234.648	6.894790e+002	6.904040e+001	657.5	34.5	8.051176e+000	0	0	0	0	0	0	588.755	1	1	57.5363	35.5833
DATA	615	8	20	0	0	A_42_P619008	NM_001013079	10373.9	234.614	4.939876e+003	4.940004e+002	4180.5	41	9.059065e+000	0	0	0	0	0	0	4231.77	1	1	57.259	41
DATA	616	8	21	0	0	A_64_P058351	NM_017101	10399.4	234.573	9.782821e+004	9.782821e+003	83879	38	1.027619e+001	0	0	0	0	0	0	84094.6	1	1	57.5363	41.4
DATA	617	8	22	0	0	A_64_P083800	XM_001058776	10424.8	235.149	6.975294e+001	7.820330e+000	130.5	39	9.912317e+000	0	0	0	0	0	0	60.1799	1	1	46.1809	39.5667
DATA	618	8	23	0	0	A_64_P028088	NM_001106073	10450.1	235.328	5.593843e+002	5.604922e+001	549	36	9.211155e+000	0	0	0	0	0	0	484.459	1	1	45.1352	37.0857
DATA	619	8	24	0	0	A_44_P105441	ENSRNOT00000042202	10475.3	235.12	1.919751e+004	1.919754e+003	16672	38	8.493275e+000	0	0	0	0	0	0	16692.4	1	1	48.8603	38.25
DATA	620	8	25	0	0	A_42_P675802	NM_145777	10501	235	2.540967e+003	2.541207e+002	2205	38.5	1.002912e+001	0	0	0	0	0	0	2218.67	1	1	46.8651	39.1053
DATA	621	8	26	0	0	A_64_P018525	ENSRNOT00000027134	10526.2	235.044	4.719496e+002	4.732302e+001	485	37	1.302867e+001	0	0	0	0	0	0	413.842	1	1	46.5243	38.0606
DATA	622	8	27	0	0	A_42_P749382	NM_001106731	10551.7	235.1	9.911106e+003	9.911167e+002	8518	37	1.148538e+001	0	0	0	0	0	0	8729.21	1	1	47.2035	36.2258
DATA	623	8	28	0	0	A_44_P316364	NM_001077675	10577	235	1.448803e+001	3.740266e+000	80	38	9.921304e+000	0	0	0	0	0	0	12.8174	1	0	54.9904	37.8529
DATA	624	8	29	0	0	A_64_P143596	ENSRNOT00000060139	10602.4	235.246	1.204333e+002	1.252294e+001	175	37	8.279090e+000	0	0	0	0	0	0	107.034	1	1	46.8651	36.72
DATA	625	8	30	0	0	A_42_P468723	NM_001191689	10627.5	235	6.911378e+002	6.919819e+001	687	38	6.438293e+000	0	0	0	0	0	0	617.044	1	1	54.1152	37.4194
DATA	626	8	31	0	0	A_42_P533792	NM_001106575	10653.3	235.353	1.008364e+004	1.008370e+003	8633	33.5	7.978808e+000	0	0	0	0	0	0	9045.27	1	1	46.1809	34.4286
DATA	627	8	32	0	0	A_43_P16773	XM_217313	10678.7	235.324	6.435418e+002	6.444314e+001	663	34	8.268609e+000	0	0	0	0	0	0	579.977	1	1	47.5395	36.3548
DATA	628	8	33	0	0	A_42_P765830	NM_001106426	10703.9	235.352	1.771255e+004	1.771258e+003	15590	40	6.396669e+000	0	0	0	0	0	0	16037.4	1	1	47.8731	40.0741
DATA	629	8	34	0	0	A_43_P15073	ENSRNOT00000030771	10728.9	235.389	1.078150e+002	1.129109e+001	170	36	8.859167e+000	0	0	0	0	0	0	98.0692	1	1	48.2044	36.1212
DATA	630	8	35	0	0	A_42_P538527	NM_001108885	10754.6	235.427	5.942360e+002	5.951728e+001	567	38	8.722360e+000	0	0	0	1	0	0	543.06	1	1	57.5363	36.2903
DATA	631	8	36	0	0	A_64_P037130	A_64_P037130	10779.5	235.186	3.334933e+000	3.327866e+000	73	34	9.677766e+000	0	0	0	0	0	0	1.63337	0	0	47.5395	33.7027
DATA	632	8	37	0	0	A_44_P536115	NM_023957	10805.4	235.608	3.795377e+003	3.795521e+002	3423.5	35.5	8.937543e+000	0	0	0	0	0	0	3500.4	1	1	49.1849	35.3824
DATA	633	8	38	0	0	A_43_P11800	NM_017059	10830.9	235.386	2.415999e+002	2.438337e+001	289	38.5	9.686736e+000	0	0	0	0	0	0	223.822	1	1	57.259	40.7105
DATA	634	8	39	0	0	A_64_P004922	NM_001191924	10856.4	235.586	1.980595e+003	1.980866e+002	1882.5	37	8.867174e+000	0	0	0	0	0	0	1842.93	1	1	47.8731	36.6296
DATA	635	8	40	0	0	A_64_P145058	NM_001107951	10881.4	235.672	1.005335e+003	1.005865e+002	1008	37	1.158580e+001	0	0	0	0	0	0	939.41	1	1	45.835	39
DATA	636	8	41	0	0	A_64_P075372	A_64_P075372	10907.2	235.43	2.567321e+001	4.142477e+000	96.5	35	9.421436e+000	0	0	0	0	0	0	24.0911	1	1	65	35.825
DATA	637	8	42	0	0	A_64_P118792	NM_001107034	10932.5	235.352	3.363482e+001	4.668783e+000	103	43	8.517256e+000	0	0	0	0	0	0	31.6889	1	1	57.5363	41.6071
DATA	638	8	43	0	0	A_42_P469685	NM_001100532	10958	235.647	4.491723e+003	4.491839e+002	4228	42.5	6.273940e+000	0	0	0	0	0	0	4248.44	1	1	46.5243	42.1667
DATA	639	8	44	0	0	A_42_P759822	NM_001109673	10983.2	235.569	6.654758e+002	6.662512e+001	698.5	38	7.954444e+000	0	0	0	0	0	0	631.767	1	1	45.4864	39.7813
DATA	640	8	45	0	0	A_64_P014687	NM_012650	11008.5	235.667	7.226014e+003	7.226085e+002	7578	37.5	1.000496e+001	0	0	0	0	0	0	6884.33	1	1	39.8942	38.1071
DATA	641	8	46	0	0	A_43_P18505	NM_001012010	11034.1	235.5	6.822995e+001	7.532389e+000	139	36	9.821197e+000	0	0	0	0	0	0	65.2254	1	1	56.9804	38.5484
DATA	642	8	47	0	0	A_43_P12580	NM_031548	11059.5	235.84	1.366287e+002	1.402828e+001	200	42	7.787658e+000	0	0	0	0	0	0	131.03	1	1	49.8279	40.9524
DATA	643	8	48	0	0	A_64_P052980	NM_001014786	11084.4	235.857	2.286193e+001	3.909771e+000	95	40	1.078533e+001	0	0	0	0	0	0	21.9895	1	1	50.1463	39.64
DATA	644	8	49	0	0	A_64_P397764	ENSRNOT00000028709	11110.3	235.5	4.380149e+002	4.391553e+001	494	36	7.561290e+000	0	0	0	0	0	0	422.486	1	1	57.5363	36.3429
DATA	645	8	50	0	0	A_64_P048408	NM_001008858	11135.6	235.742	9.571435e+001	1.007794e+001	167	39	9.349955e+000	0	0	0	0	0	0	92.5558	1	1	46.1809	36.963
DATA	647	8	52	0	0	A_64_P059500	ENSRNOT00000043917	11185.9	235.534	4.999259e+000	3.180713e+000	78	35	8.153967e+000	0	0	0	0	0	0	4.85518	1	0	48.5334	35.4444
DATA	648	8	53	0	0	A_64_P220198	AW917371	11211.3	235.734	7.416955e+000	3.222004e+000	80.5	34.5	7.498102e+000	0	0	0	0	0	0	7.21631	1	0	50.4627	35.6923
DATA	649	8	54	0	0	A_64_P109764	NM_001007756	11237	236.134	3.554213e+002	3.567973e+001	422	37	8.010661e+000	0	0	0	0	0	0	346.351	1	1	46.8651	36.2105
DATA	650	8	55	0	0	A_64_P142685	NM_001130498	11262.5	235.5	1.371134e+001	3.414096e+000	86	40	8.481507e+000	0	0	0	0	0	0	13.378	1	0	65	41.3103
DATA	651	8	56	0	0	A_44_P395709	NM_134366	11287.9	236.029	1.300523e+003	1.300898e+002	1363	42	1.272605e+001	0	0	0	0	0	0	1270.18	1	1	46.8651	42.7857
DATA	652	8	57	0	0	A_64_P165071	NM_001110165	11313.3	235.459	1.239964e+004	1.239968e+003	12168.5	37	8.699514e+000	0	0	0	0	0	0	12118.4	1	1	51.7088	36.8077
DATA	653	8	58	0	0	A_64_P009147	ENSRNOT00000042587	11338.6	235.808	6.975081e+001	7.641166e+000	139	37	6.396093e+000	0	0	0	0	0	0	68.1961	1	1	48.2044	37.92
DATA	654	8	59	0	0	A_42_P647072	NM_178102	11364.1	235.896	1.931404e+003	1.931656e+002	1925	37	7.485218e+000	0	0	0	0	0	0	1888.52	1	1	46.8651	36.5185
DATA	655	8	60	0	0	A_64_P125585	XM_001063000	11389.4	236.027	3.509601e+001	4.696343e+000	104	37	7.033908e+000	0	0	0	0	0	0	34.309	1	1	48.5334	38.8
DATA	656	8	61	0	0	A_42_P610317	NM_001108225	11415	236	6.528280e+003	6.528355e+002	6420	37	7.626438e+000	0	0	0	0	0	0	6378.32	1	1	46.8651	36.6552
DATA	657	8	62	0	0	A_42_P755831	NM_152935	11440.3	236.357	2.220967e+004	2.220969e+003	21392	41	1.128640e+001	0	0	0	0	0	0	21680.9	1	1	46.8651	40.871
DATA	659	8	64	0	0	A_44_P386375	NM_053842	11490.7	236.26	2.075904e+002	2.099422e+001	262	27	6.957938e+000	0	0	0	1	1	0	202.092	1	1	48.8603	27.7097
DATA	660	8	65	0	0	A_43_P15565	NM_023953	11516.5	235.648	3.196049e+001	4.480326e+000	96.5	28.5	1.109490e+001	0	0	0	0	1	0	31.0527	1	1	57.5363	30.5
DATA	661	8	66	0	0	A_42_P456701	NM_001009697	11542	236.176	9.473794e+002	9.479019e+001	991	37	2.460885e+001	0	0	0	0	0	0	918.426	1	1	46.8651	45.3462
DATA	662	8	67	0	0	A_43_P20388	ENSRNOT00000061333	11567.2	236.31	7.694856e+002	7.701321e+001	786	38	1.987499e+001	0	0	0	0	0	0	744.049	1	1	46.8651	43.8462
DATA	663	8	68	0	0	A_44_P572504	TC585660	11592.5	235.648	3.375327e+002	3.390129e+001	396	41	1.618814e+001	0	0	0	0	0	0	325.396	1	1	57.5363	41.4516
DATA	664	8	69	0	0	A_64_P059964	NM_001013858	11618.2	236.265	2.507333e+003	2.507534e+002	2420	26	1.221513e+001	0	0	0	0	1	0	2409.18	1	1	46.1809	29.069
DATA	665	8	70	0	0	A_44_P1056293	ENSRNOT00000022862	11643.5	236.11	1.109801e+003	1.110258e+002	1110	34	1.013882e+001	0	0	0	0	0	0	1062.42	1	1	48.2044	33.9355
DATA	666	8	71	0	0	A_64_P133276	NM_001107464	11668.8	236	8.762491e+002	8.768331e+001	920	38.5	1.608757e+001	0	0	0	0	0	0	835.435	1	1	46.8651	43.125
DATA	667	8	72	0	0	A_42_P667782	NM_001009673	11694	236.203	1.353974e+003	1.354355e+002	1362	40	1.045130e+001	0	0	0	0	0	0	1285.27	1	1	46.8651	40.7838
DATA	668	8	73	0	0	A_64_P023624	A_64_P023624	11719.5	236.119	3.882437e+002	3.895844e+001	441.5	40	1.112348e+001	0	0	0	0	0	0	366.763	1	1	46.1809	39.5833
DATA	669	8	74	0	0	A_64_P110130	NM_001106172	11744.6	235.923	4.591270e+002	4.602730e+001	526	34	9.199282e+000	0	0	0	0	0	0	431.492	1	1	45.1352	34.6296
DATA	670	8	75	0	0	A_64_P087728	XM_001078778	11769.9	236.104	1.961963e+002	1.988929e+001	261	32	7.138705e+000	0	0	0	0	0	0	183.372	1	1	46.8651	32.8056
DATA	671	8	76	0	0	A_44_P475356	NM_001177823	11795.4	236.147	1.862123e+002	1.890851e+001	248	37	1.338086e+001	0	0	0	0	0	0	173.004	1	1	47.2035	39.8788
DATA	672	8	77	0	0	A_42_P560984	NM_001109179	11821.1	236.235	1.595479e+004	1.595482e+003	14592	39	5.727015e+000	0	0	0	0	0	0	14728.7	1	1	46.1809	39.6818
DATA	673	8	78	0	0	A_42_P566906	NM_001006966	11846.3	236.333	3.757701e+003	3.757849e+002	3529	38.5	7.553505e+000	0	0	0	0	0	0	3445.86	1	1	46.8651	39.0938
DATA	674	8	79	66	1	DarkCorner	DarkCorner	11872	236.319	3.362637e+000	3.350712e+000	67	37	7.932256e+000	0	0	0	0	0	0	-7.81786	0	0	65	37.4412
DATA	675	8	80	66	1	DarkCorner	DarkCorner	11897	236.181	3.387538e+000	3.375525e+000	66	37	9.623523e+000	0	0	0	0	0	0	-7.72987	0	0	51.4001	37.2927
DATA	676	8	81	66	1	DarkCorner	DarkCorner	11922.2	236.388	3.414018e+000	3.401911e+000	71	34	8.229686e+000	0	0	0	0	0	0	-4.70325	0	0	51.7088	35.5143
DATA	677	8	82	66	1	DarkCorner	DarkCorner	11948.1	236.03	3.443090e+000	3.430881e+000	73	31	8.826968e+000	0	0	0	0	0	0	-2.1809	0	0	46.8651	33.2368
DATA	678	8	83	66	1	DarkCorner	DarkCorner	11973.3	236.304	3.472581e+000	3.460267e+000	70	32.5	6.615218e+000	0	0	0	0	0	0	-6.24726	0	0	50.4627	32.3056
DATA	679	8	84	66	1	DarkCorner	DarkCorner	11999	236.455	3.504378e+000	3.498461e+000	78	32	7.608100e+000	0	0	0	0	0	0	1.86373	0	0	55.8519	32.963
DATA	680	8	85	66	1	DarkCorner	DarkCorner	12024.5	236.192	4.202293e+000	3.550187e+000	78	33	8.618718e+000	0	0	0	0	0	0	3.63657	1	0	47.8731	33.1854
DATA	681	9	1	66	1	DarkCorner	DarkCorner	9878.5	241.65	3.550732e+000	3.538140e+000	63	31	7.868870e+000	0	0	0	0	0	0	-5.17459	0	0	50.4627	31.4151
DATA	682	9	2	66	1	DarkCorner	DarkCorner	9903.95	241.685	3.569223e+000	3.556566e+000	58	39	8.553944e+000	0	0	0	0	0	0	-9.68236	0	0	53.5237	35.7931
DATA	683	9	3	66	1	DarkCorner	DarkCorner	9929.63	242.097	3.585552e+000	3.572837e+000	60.5	38	1.009036e+001	0	0	0	0	0	0	-8.76451	0	0	48.5334	36.1538
DATA	684	9	4	66	1	DarkCorner	DarkCorner	9954.45	241.96	3.599081e+000	3.586318e+000	61	34	1.067632e+001	0	0	0	0	0	0	-6.1718	0	0	55.5662	33.875
DATA	685	9	5	66	1	DarkCorner	DarkCorner	9980.42	241.573	3.610976e+000	3.598171e+000	57.5	35	1.281451e+001	0	0	0	0	0	0	-8.09696	0	0	57.5363	37.7143
DATA	686	9	6	66	1	DarkCorner	DarkCorner	10005.5	242.012	3.620463e+000	3.607624e+000	57.5	33	7.105634e+000	0	0	0	0	0	0	-11.2691	0	0	50.4627	34.5185
DATA	687	9	7	66	1	DarkCorner	DarkCorner	10030.4	242.382	3.627856e+000	3.614991e+000	61	30	5.672067e+000	0	0	0	0	0	0	-6.7382	0	0	46.1809	31.2121
DATA	688	9	8	0	0	A_44_P195306	NM_019377	10056.3	242.38	3.348008e+004	3.348010e+003	27400.5	33	8.917182e+000	0	0	0	0	0	0	28209.1	1	1	47.5395	32.129
DATA	689	9	9	0	0	A_44_P653240	NM_001202552	10081.9	241.896	8.967438e+002	8.974759e+001	822	32	1.068887e+001	0	0	0	0	0	0	754.798	1	1	46.8651	31.7576
DATA	690	9	10	0	0	A_64_P012778	ENSRNOT00000038310	10107	242.055	5.881666e+000	3.673630e+000	75	34	8.852324e+000	0	0	0	0	0	0	4.94808	1	0	46.8651	33.3636
DATA	691	9	11	0	0	A_43_P11430	NM_001130503	10132.4	242.071	3.893361e+002	3.910213e+001	390	34	7.098235e+000	0	0	0	0	0	0	327.518	1	1	47.5395	34.4194
DATA	692	9	12	0	0	A_44_P225353	NM_001009678	10157.9	242.014	5.527534e+002	5.539408e+001	516.5	36.5	4.146873e+000	0	0	0	0	0	0	465.167	1	1	46.8651	36.1
DATA	693	9	13	0	0	A_64_P055231	NM_001106620	10183.4	242.205	1.151559e+003	1.152128e+002	1059	33.5	7.110466e+000	0	0	0	0	0	0	969.871	1	1	49.5074	33.8889
DATA	694	9	14	0	0	A_42_P540950	NM_001009541	10208.9	242.057	9.540005e+002	9.546862e+001	849	36	7.765470e+000	0	0	0	0	0	0	804.452	1	1	46.8651	35.8571
DATA	695	9	15	0	0	A_64_P135888	ENSRNOT00000029916	10234.5	242	9.196250e+000	3.727262e+000	79	36	1.001504e+001	0	0	0	0	0	0	7.76698	1	0	54.1152	37.7436
DATA	696	9	16	0	0	A_64_P086448	NM_001008819	10259.1	242.485	1.045770e+002	1.106172e+001	155	35	9.553700e+000	0	0	0	0	0	0	88.4881	1	1	46.1809	35.7813
DATA	697	9	17	0	0	A_42_P701779	NM_001108048	10285.1	242.214	1.828285e+003	1.828638e+002	1574.5	34	7.868667e+000	0	0	0	0	0	0	1550.56	1	1	46.8651	34.973
DATA	698	9	18	0	0	A_44_P409965	ENSRNOT00000036078	10310.2	242.406	3.272828e+001	4.856439e+000	97	35	8.933881e+000	0	0	0	0	0	0	27.827	1	1	45.1352	35.7826
DATA	699	9	19	0	0	A_44_P474037	NM_052807	10335.6	242.361	2.429881e+002	2.456081e+001	273	35	8.346257e+000	0	0	0	0	0	0	207.184	1	1	48.2044	34.92
DATA	700	9	20	0	0	A_64_P156985	NM_001000385	10361.4	242.427	1.016983e+001	3.708762e+000	78	38	9.245659e+000	0	0	0	0	0	0	8.69865	1	0	57.5363	38.6316
DATA	701	9	21	0	0	A_42_P635228	NM_001107651	10386.5	242.352	8.231700e+001	8.966497e+000	137.5	38	1.026145e+001	0	0	0	0	0	0	70.6411	1	1	65	40.7879
DATA	702	9	22	0	0	A_64_P240508	ENSRNOT00000018000	10412	242.455	3.089200e+002	3.109442e+001	336	39	9.412822e+000	0	0	0	0	0	0	266.05	1	1	65	39.7317
DATA	703	9	23	0	0	A_64_P026509	NM_020656	10437.4	242.427	1.800450e+002	1.834709e+001	222.5	42	9.443340e+000	0	0	0	0	0	0	155.642	1	1	57.5363	40.48
DATA	704	9	24	0	0	A_42_P570241	NM_177928	10462.9	242.429	2.908167e+002	2.929333e+001	324	38	8.320546e+000	0	0	0	0	0	0	252.394	1	1	47.8731	38.75
DATA	706	9	26	0	0	A_64_P032893	TC597420	10513.6	242.427	3.334313e+004	3.334315e+003	28572	40	9.937399e+000	0	0	0	0	0	0	29178.8	1	1	57.5363	40.4242
DATA	707	9	27	0	0	A_64_P043605	NM_001024799	10539.1	242.279	4.711366e+003	4.711494e+002	4176	33	9.828079e+000	0	0	0	0	0	0	4140.99	1	1	45.835	34.3448
DATA	708	9	28	0	0	A_64_P095890	NM_019337	10564.3	242.618	1.848746e+004	1.848749e+003	16131.5	40	1.049549e+001	0	0	0	0	0	0	16321.3	1	1	46.5243	38.697
DATA	709	9	29	0	0	A_42_P513145	NM_001107288	10589.6	242.556	5.456321e+002	5.467154e+001	539.5	35	1.006239e+001	0	0	0	0	0	0	483.878	1	1	48.2044	35.3
DATA	710	9	30	0	0	A_64_P122317	NM_001108031	10615.1	242.5	2.142959e+002	2.170143e+001	258	41	9.413229e+000	0	0	0	0	0	0	190.92	1	1	56.9804	39.1875
DATA	711	9	31	0	0	A_64_P065492	NM_001109101	10640.5	242.5	3.761681e+001	5.076107e+000	103	38	9.332442e+000	0	0	0	0	0	0	33.6694	1	1	57.5363	39.4359
DATA	712	9	32	0	0	A_64_P129273	NM_001105871	10665.9	242.5	7.899031e+001	8.596702e+000	142.5	34.5	5.798650e+000	0	0	0	0	0	0	71.0323	1	1	56.9804	35.9286
DATA	713	9	33	0	0	A_64_P050748	NM_181824	10691.4	242.427	1.807263e+002	1.838534e+001	229	38.5	8.212410e+000	0	0	0	0	0	0	163.285	1	1	57.5363	39.0667
DATA	714	9	34	0	0	A_42_P689755	NM_053306	10716.4	242.294	5.238282e+001	6.223834e+000	121	39	9.261344e+000	0	0	0	0	0	0	47.5455	1	1	46.1809	38.9286
DATA	715	9	35	0	0	A_64_P039586	TC635481	10742.2	242.594	2.297341e+002	2.321567e+001	279	38	8.731996e+000	0	0	0	0	0	0	209.512	1	1	47.2035	37.4054
DATA	716	9	36	0	0	A_64_P083474	NM_001134731	10767.6	242.763	7.301735e+003	7.301811e+002	6663.5	32	9.040530e+000	0	0	0	0	0	0	6689.96	1	1	49.1849	33.7419
DATA	718	9	38	0	0	A_42_P763553	NM_001107486	10817.9	242.908	1.752638e+002	1.783431e+001	232	37	7.584735e+000	0	0	0	0	0	0	162.031	1	1	46.1809	37.4
DATA	719	9	39	0	0	A_44_P151513	NM_001000901	10843.6	242.573	1.599553e+001	3.653812e+000	85	39	9.123002e+000	0	0	0	0	0	0	14.8541	1	0	57.5363	41.6667
DATA	720	9	40	0	0	A_42_P460204	ENSRNOT00000020886	10869.1	242.955	5.370779e+002	5.380730e+001	570	37	9.864697e+000	0	0	0	0	0	0	500.93	1	1	46.8651	37.6957
DATA	721	9	41	0	0	A_44_P218147	NM_001013432	10893.8	242.857	5.174280e+001	6.114226e+000	121	33	1.077236e+001	0	0	0	0	0	0	48.4589	1	1	45.1352	35.6765
DATA	722	9	42	0	0	A_42_P554722	NM_001099758	10919.8	242.658	1.304042e+004	1.304046e+003	11975.5	38	8.393546e+000	0	0	0	0	0	0	12264.1	1	1	48.2044	38.5
DATA	723	9	43	0	0	A_44_P135450	XM_223143	10945.4	242.573	2.677842e+002	2.697261e+001	318.5	44	5.442850e+000	0	0	0	0	0	0	252.853	1	1	57.5363	43.7692
DATA	724	9	44	0	0	A_64_P107329	NM_001013207	10970.7	242.778	8.830263e+003	8.830321e+002	8400	38	9.804316e+000	0	0	0	0	0	0	8369.61	1	1	47.5395	38.2692
DATA	725	9	45	0	0	A_64_P116219	NM_001004085	10996.2	242.892	1.473684e+004	1.473688e+003	13927	38	1.127646e+001	0	0	0	0	0	0	14019.4	1	1	45.835	40.9615
DATA	726	9	46	0	0	A_44_P147396	NM_001191744	11021.3	242.97	4.365890e+001	5.410521e+000	110	34.5	8.092308e+000	0	0	0	0	0	0	41.6768	1	1	45.835	36.3214
DATA	727	9	47	0	0	A_44_P975743	TC626448	11046.8	242.775	1.512805e+003	1.513140e+002	1499	36	1.005402e+001	0	0	0	0	0	0	1448.9	1	1	47.2035	39
DATA	728	9	48	0	0	A_42_P728472	NM_001007600	11072.2	243.179	8.735132e+003	8.735190e+002	8286.5	41.5	1.218899e+001	0	0	0	0	0	0	8392.15	1	1	46.1809	41
DATA	729	9	49	0	0	A_64_P130139	NM_013181	11097.7	242.9	1.156923e+004	1.156927e+003	11150	38.5	7.891194e+000	0	0	0	0	0	0	11147.1	1	1	47.2035	37.8235
DATA	730	9	50	0	0	A_42_P481087	XM_232226	11123	243.226	8.764668e+002	8.770355e+001	909	38	9.253305e+000	0	0	0	0	0	0	846.744	1	1	45.4864	37.9032
DATA	731	9	51	0	0	A_44_P102465	NM_001000424	11148.3	243.328	6.290646e+001	7.035279e+000	132	41	7.822748e+000	0	0	0	0	0	0	60.9212	1	1	45.835	40.3462
DATA	732	9	52	0	0	A_64_P082557	ENSRNOT00000029274	11173.6	242.573	2.801783e+001	4.210743e+000	97.5	36.5	8.560741e+000	0	0	0	0	0	0	27.192	1	1	57.5363	37.0625
DATA	733	9	53	0	0	A_64_P064873	XM_228599	11199.1	242.614	3.259667e+001	4.524079e+000	103	39.5	8.622678e+000	0	0	0	0	0	0	31.6977	1	1	57.259	38.8333
DATA	734	9	54	0	0	A_64_P042298	A_64_P042298	11224.2	243.323	8.990882e+001	9.520741e+000	159	37	7.245050e+000	0	0	0	0	0	0	87.5775	1	1	45.4864	37.2571
DATA	735	9	55	0	0	A_44_P286341	ENSRNOT00000038519	11249.6	243	1.327976e+001	3.397734e+000	84	38.5	8.813780e+000	0	0	0	0	0	0	12.9536	1	0	48.5334	38.8824
DATA	736	9	56	0	0	A_44_P994614	NM_001106646	11275.5	243	4.351780e+004	4.351781e+003	42850.5	40	7.780391e+000	0	0	0	0	0	0	42498.1	1	1	54.1152	40.9655
DATA	737	9	57	0	0	A_64_P098354	XM_001066867	11300.5	243	1.344778e+002	1.380525e+001	202.5	37	1.182075e+001	0	0	0	0	0	0	131.436	1	1	54.1152	39.2143
DATA	738	9	58	0	0	A_64_P117373	NM_001107752	11326.1	243	8.427896e+001	8.986698e+000	154	35.5	9.614285e+000	0	0	0	0	0	0	82.4188	1	1	46.8651	36.7813
DATA	739	9	59	0	0	A_64_P111395	ENSRNOT00000025391	11351.5	243	5.442054e+002	5.450983e+001	611	37	9.615629e+000	0	0	0	0	0	0	532.327	1	1	48.5334	38.6429
DATA	740	9	60	0	0	A_64_P059465	XM_229201	11376.5	243	1.234084e+001	3.354177e+000	86	35	9.070876e+000	0	0	0	0	0	0	12.0708	1	0	54.1152	36.069
DATA	741	9	61	0	0	A_64_P010852	NM_001106214	11402.3	243.029	1.726074e+004	1.726077e+003	16427.5	37	9.320846e+000	0	0	0	0	0	0	16876.7	1	1	46.1809	39.5333
DATA	742	9	62	0	0	A_64_P024967	NM_001008359	11427.1	243.052	5.708254e+001	6.506327e+000	131	38.5	9.265789e+000	0	0	0	0	0	0	55.7745	1	1	43.7019	40.125
DATA	743	9	63	0	0	A_44_P278418	NM_012538	11453	243	2.128731e+001	3.781546e+000	92.5	35.5	9.705567e+000	0	0	0	0	0	0	20.7777	1	1	54.9904	36.2619
DATA	744	9	64	0	0	A_44_P821875	NM_001009500	11478.5	243.352	7.043409e+001	7.707434e+000	137.5	33.5	1.077463e+001	0	0	0	0	0	0	68.6554	1	1	57.5363	33.6875
DATA	745	9	65	0	0	A_64_P066737	A_64_P066737	11504.2	243.397	5.200975e+001	6.072802e+000	117	28	7.034143e+000	0	0	0	0	1	0	50.609	1	1	42.9674	27.6667
DATA	746	9	66	0	0	A_64_P003943	TC616650	11529.4	243.427	3.901958e+001	5.009416e+000	107	28	1.083797e+001	0	0	0	0	0	0	37.8913	1	1	57.5363	32.3333
DATA	747	9	67	0	0	A_64_P047035	ENSRNOT00000066263	11554.5	243.352	6.807010e+001	7.500096e+000	126	34	1.595126e+001	0	0	0	0	0	0	65.9447	1	1	57.5363	38.4783
DATA	748	9	68	0	0	A_64_P113867	NM_001077201	11579.9	243.057	3.203554e+002	3.219079e+001	379	42	1.595158e+001	0	0	0	0	0	0	309.491	1	1	46.8651	41.8235
DATA	749	9	69	0	0	A_64_P013758	NM_012582	11605.4	243.427	1.353218e+002	1.389796e+001	182.5	38	1.304529e+001	0	0	0	0	0	0	130.327	1	1	65	37.5556
DATA	750	9	70	0	0	A_44_P303982	NM_001106381	11630.6	243.427	9.677436e+001	1.018605e+001	160	30	1.094157e+001	0	0	0	0	0	0	92.8815	1	1	57.5363	32.2222
DATA	751	9	71	0	0	A_64_P048601	A_64_P048601	11656.2	243.37	4.372462e+002	4.384089e+001	472	36	1.899368e+001	0	0	0	0	0	0	418.03	1	1	48.2044	42.52
DATA	752	9	72	0	0	A_44_P304880	NM_001014261	11681	243.338	9.881253e+001	1.038775e+001	166	44	1.196923e+001	0	0	0	0	0	0	94.0805	1	1	45.835	43.0645
DATA	753	9	73	0	0	A_64_P096767	ENSRNOT00000039549	11706.9	243.114	3.230661e+000	3.231308e+000	75	40	1.341001e+001	0	0	0	0	0	0	2.64789	0	0	46.8651	40.8889
DATA	754	9	74	0	0	A_43_P21810	NM_001025000	11732.2	243.13	1.774567e+001	3.689913e+000	88.5	36	1.137359e+001	0	0	0	0	0	0	16.7335	1	1	41.0736	38.8929
DATA	756	9	76	0	0	A_64_P084976	NM_001008916	11783.1	243.5	4.585853e+000	3.303127e+000	78	34	8.963389e+000	0	0	0	0	0	0	4.27675	1	0	56.9804	35.1351
DATA	757	9	77	0	0	A_64_P040004	XM_001054754	11808.3	243.478	3.338066e+003	3.338228e+002	3169	39	7.532456e+000	0	0	0	0	0	0	3094.23	1	1	46.5243	40.7407
DATA	758	9	78	0	0	A_64_P156785	XM_001058828	11833.9	243.5	3.324396e+000	3.323855e+000	77	38	9.451631e+000	0	0	0	0	0	0	2.51605	0	0	65	39.7778
DATA	759	9	79	0	0	A_64_P123914	XM_217505	11859.1	243.757	2.581272e+004	2.581275e+003	23572.5	38	7.241897e+000	0	0	0	0	0	0	23610.6	1	1	46.5243	37.8485
DATA	760	9	80	66	1	DarkCorner	DarkCorner	11884.6	243.701	3.371546e+000	3.359589e+000	67	38	7.901860e+000	0	0	0	0	0	0	-7.18895	0	0	50.1463	37.4242
DATA	761	9	81	66	1	DarkCorner	DarkCorner	11910	243.769	3.397387e+000	3.385339e+000	66	37	8.909554e+000	0	0	0	0	0	0	-8.19275	0	0	45.835	36.3611
DATA	762	9	82	66	1	DarkCorner	DarkCorner	11935.5	243.5	3.424947e+000	3.412802e+000	69	33.5	6.855070e+000	0	0	0	0	0	0	-4.5871	0	0	57.5363	34.0882
DATA	763	9	83	66	1	DarkCorner	DarkCorner	11960.7	243.5	3.453584e+000	3.441336e+000	70.5	34	8.239289e+000	0	0	0	0	0	0	-2.87105	0	0	57.5363	34.9459
DATA	764	9	84	66	1	DarkCorner	DarkCorner	11986.3	243.423	3.484412e+000	3.472055e+000	69	32	6.128516e+000	0	0	0	0	0	0	-5.02991	0	0	47.8731	32.6061
DATA	765	9	85	66	1	DarkCorner	DarkCorner	12011.4	243.279	6.502503e+000	3.563519e+000	81	34	9.195001e+000	0	0	0	0	0	0	5.66171	1	0	43.7019	34.2973
DATA	766	10	1	66	1	DarkCorner	DarkCorner	9891.21	249.318	3.561322e+000	3.548693e+000	65.5	37	7.920989e+000	0	0	0	0	0	0	-3.5546	0	0	45.4864	35.9545
DATA	767	10	2	66	1	DarkCorner	DarkCorner	9916.46	248.723	3.578326e+000	3.565637e+000	58.5	33	9.673848e+000	0	0	0	0	0	0	-9.38307	0	0	46.1809	33.2
DATA	768	10	3	66	1	DarkCorner	DarkCorner	9941.98	249.25	3.593351e+000	3.580609e+000	56	37	8.003160e+000	0	0	0	0	0	0	-10.7251	0	0	44.4243	36.5333
DATA	769	10	4	66	1	DarkCorner	DarkCorner	9967.36	249.386	3.606017e+000	3.593229e+000	59	34.5	1.289645e+001	0	0	0	0	0	0	-6.66439	0	0	47.8731	35.9375
DATA	770	10	5	66	1	DarkCorner	DarkCorner	9992.14	249.816	3.616338e+000	3.603514e+000	59.5	35	5.603858e+000	0	0	0	0	0	0	-9.62779	0	0	52.6241	34.875
DATA	771	10	6	66	1	DarkCorner	DarkCorner	10017.8	249.369	3.624881e+000	3.612026e+000	62	33.5	6.116620e+000	0	0	0	0	0	0	-4.66628	0	0	45.4864	32.25
DATA	772	10	7	0	0	A_64_P139937	XM_001070013	10043.6	249.427	3.631444e+000	3.618566e+000	67	30	6.244137e+000	0	0	0	0	1	0	-0.827799	0	0	57.5363	30.5484
DATA	773	10	8	0	0	A_44_P185613	XM_001080030	10069	249.565	1.106301e+002	1.164118e+001	159	30	9.942140e+000	0	0	0	0	0	0	93.1507	1	1	47.8731	32.3333
DATA	774	10	9	0	0	A_42_P738520	NM_001007746	10094.7	249.338	1.422113e+003	1.422576e+002	1231.5	34	1.077215e+001	0	0	0	0	0	0	1196.52	1	1	48.5334	33.6563
DATA	775	10	10	66	-1	(-)3xSLv1	NegativeControl	10120	249.455	3.639682e+000	3.626775e+000	63	34	8.502614e+000	0	0	0	0	0	0	-3.5399	0	0	55.8519	32.6389
DATA	776	10	11	0	0	A_42_P626023	NM_001107265	10145.4	249.427	7.971449e+002	7.979692e+001	727.5	35	5.713434e+000	0	0	0	0	0	0	670.644	1	1	57.5363	35.32
DATA	777	10	12	0	0	A_43_P11120	XR_085824	10170.6	249.479	2.749665e+003	2.749904e+002	2325	35	6.407254e+000	0	0	0	0	0	0	2314.73	1	1	48.2044	34.6429
DATA	778	10	13	0	0	A_42_P473425	NM_138844	10196.3	249.5	9.373366e+001	1.004814e+001	146	33	6.080400e+000	0	0	0	0	0	0	78.989	1	1	57.5363	34.1667
DATA	779	10	14	0	0	A_44_P692981	ENSRNOT00000007422	10221.5	249.5	5.350476e+001	6.457269e+000	110.5	36	7.959922e+000	0	0	0	0	0	0	45.1511	1	1	57.5363	37.027
DATA	780	10	15	0	0	A_64_P102366	A_64_P102366	10246.9	249.5	3.016273e+001	4.703256e+000	95	37	1.061278e+001	0	0	0	0	0	0	25.4984	1	1	56.9804	39.7
DATA	781	10	16	0	0	A_42_P616287	NM_001134555	10272.2	249.882	2.648575e+002	2.672945e+001	297	35	9.851940e+000	0	0	0	0	0	0	224.369	1	1	46.5243	36.3077
DATA	782	10	17	0	0	A_64_P073995	XM_001081370	10297.3	249.394	3.882314e+001	5.289523e+000	103	37	6.818151e+000	0	0	0	0	0	0	32.9668	1	1	46.1809	36.4444
DATA	783	10	18	0	0	A_42_P595381	NM_001107258	10323.1	249.5	3.490476e+003	3.490660e+002	3019	39	9.976351e+000	0	0	0	0	0	0	2972.11	1	1	56.9804	38.3
DATA	784	10	19	0	0	A_42_P462205	NM_001007745	10348.4	249.608	6.095779e+003	6.095884e+002	5093	39	1.180429e+001	0	0	0	0	0	0	5205.95	1	1	49.1849	40.1471
DATA	785	10	20	0	0	A_64_P016102	A_64_P016102	10373.7	249.5	3.889837e+001	5.273440e+000	103	35	7.261717e+000	0	0	0	0	0	0	33.3268	1	1	57.5363	36.3056
DATA	786	10	21	0	0	A_64_P017829	NM_001128216	10399.3	249.5	1.457821e+001	3.836061e+000	83	36.5	7.914615e+000	0	0	0	0	0	0	12.5338	1	0	57.5363	37.5625
DATA	787	10	22	0	0	A_64_P090244	NM_001127449	10424.6	249.573	1.606929e+005	1.606929e+004	138490	38	8.716668e+000	0	0	0	0	0	0	138662	1	1	57.5363	39.1379
DATA	788	10	23	0	0	A_42_P503626	NM_001044247	10450.1	249.5	6.273043e+001	7.193988e+000	124.5	38	9.935491e+000	0	0	0	0	0	0	54.3398	1	1	56.9804	37.7742
DATA	789	10	24	0	0	A_64_P144850	ENSRNOT00000002335	10475	250.338	7.313914e+001	8.111597e+000	135	38	9.069033e+000	0	0	0	0	0	0	63.6074	1	1	46.1809	37.8929
DATA	790	10	25	0	0	A_42_P703023	NM_145776	10500.8	249.621	6.047255e+002	6.057335e+001	585	34.5	9.741210e+000	0	0	0	0	0	0	528.139	1	1	45.4864	36.0263
DATA	791	10	26	0	0	A_64_P153581	NM_001109367	10526.4	249.573	1.160082e+002	1.211095e+001	152	37.5	1.047996e+001	0	0	0	0	0	0	101.756	1	1	57.5363	38.0938
DATA	792	10	27	0	0	A_44_P156782	NM_001013879	10551.7	249.894	9.653441e+002	9.659649e+001	921	35	7.537917e+000	0	0	0	0	0	0	850.474	1	1	45.835	33.0345
DATA	793	10	28	0	0	A_43_P12841	NM_053535	10577	249.545	2.372784e+002	2.397694e+001	275	38	7.706929e+000	0	0	0	0	0	0	209.98	1	1	55.8519	36.1538
DATA	794	10	29	0	0	A_64_P097715	NM_001135710	10602.4	249.573	1.166896e+002	1.216305e+001	173	38.5	9.584470e+000	0	0	0	0	0	0	103.738	1	1	57.5363	37
DATA	795	10	30	0	0	A_42_P769597	NM_001106230	10627.9	250.242	1.098383e+003	1.098914e+002	1046	34.5	8.316327e+000	0	0	0	0	0	0	981.041	1	1	45.835	37.25
DATA	796	10	31	0	0	A_42_P561835	ENSRNOT00000043937	10653.3	250.357	2.521868e+002	2.544680e+001	293.5	33	6.708580e+000	0	0	0	0	0	0	226.297	1	1	46.8651	33.7714
DATA	797	10	32	0	0	A_42_P604399	NM_012941	10678.7	250.333	1.656536e+004	1.656539e+003	14973.5	36.5	7.411827e+000	0	0	0	0	0	0	14934.6	1	1	44.4243	36.25
DATA	798	10	33	0	0	A_42_P744495	NM_017125	10704.1	250.175	2.942823e+003	2.943016e+002	2772	38	8.059077e+000	0	0	0	0	0	0	2665.57	1	1	45.4864	37.8889
DATA	799	10	34	0	0	A_64_P047391	A_64_P047391	10729.2	250.355	5.522686e+002	5.532852e+001	580	38	9.215812e+000	0	0	0	0	0	0	502.559	1	1	44.4243	37.7419
DATA	800	10	35	0	0	A_44_P856007	NM_001108489	10754.5	250.162	1.642447e+002	1.676001e+001	214.5	37	8.741296e+000	0	0	0	0	0	0	150.157	1	1	46.8651	35.7778
DATA	801	10	36	0	0	A_64_P057562	ENSRNOT00000031129	10779.8	250.323	9.757951e+002	9.763603e+001	983	34.5	8.567031e+000	0	0	0	0	0	0	896.205	1	1	45.4864	34.8947
DATA	802	10	37	0	0	A_64_P102395	ENSRNOT00000029656	10805.1	250.175	1.673951e+002	1.706297e+001	220	37	9.375129e+000	0	0	0	0	0	0	154.438	1	1	45.4864	37.4706
DATA	803	10	38	0	0	A_64_P132318	NM_133296	10831	250.385	9.052806e+002	9.058788e+001	907	39	8.182659e+000	0	0	0	0	0	0	839.045	1	1	45.4864	40.2632
DATA	805	10	40	0	0	A_64_P158848	NM_001130540	10881.6	250.219	1.674702e+003	1.675020e+002	1643	35.5	9.964244e+000	0	0	0	0	0	0	1565.64	1	1	44.7812	36.6154
DATA	806	10	41	0	0	A_64_P302888	NM_001135015	10907.1	249.935	6.614273e+001	7.369424e+000	134	31.5	6.928203e+000	0	0	0	0	0	0	62.0936	1	1	54.4085	33
DATA	807	10	42	0	0	A_42_P604331	NM_001108533	10932.5	250	9.385559e+004	9.385560e+003	88763.5	42.5	7.746338e+000	0	0	0	0	0	0	88467	1	1	54.1152	41.1667
DATA	808	10	43	0	0	A_64_P166406	NM_019152	10957.7	249.986	7.375344e+002	7.382387e+001	764	40	1.076292e+001	0	0	0	0	0	0	697.883	1	1	47.2035	39.9259
DATA	809	10	44	0	0	A_64_P123660	NM_001031655	10983.4	250.111	2.235122e+003	2.235353e+002	2093.5	39	9.610238e+000	0	0	0	0	0	0	2122.99	1	1	48.5334	40.24
DATA	810	10	45	0	0	A_42_P668800	NM_001127553	11008.7	250.136	1.356848e+003	1.357225e+002	1336	38	8.951781e+000	0	0	0	0	0	0	1293.38	1	1	45.835	38.9565
DATA	811	10	46	0	0	A_64_P090458	NM_001109516	11034.3	250.104	4.540234e+000	3.221594e+000	74	35	9.306441e+000	0	0	0	0	0	0	4.34267	1	0	45.835	37.1212
DATA	812	10	47	0	0	A_42_P635396	NM_001109506	11059.4	250.129	2.996649e+003	2.996818e+002	2923	37	1.113003e+001	0	0	0	0	0	0	2875.36	1	1	47.5395	40.1739
DATA	813	10	48	0	0	A_64_P002989	NM_031604	11084.6	250.404	9.428615e+004	9.428616e+003	91936	39.5	1.018577e+001	0	0	0	0	0	0	90740.5	1	1	57.8122	38.25
DATA	814	10	49	0	0	A_44_P914346	DV717012	11110.4	250.288	1.838572e+003	1.838844e+002	1807	38	8.127221e+000	0	0	0	0	0	0	1774.43	1	1	48.5334	37.8621
DATA	815	10	50	0	0	A_44_P791176	NM_001130577	11135.5	250.352	2.216125e+001	3.853852e+000	92.5	38	6.887144e+000	0	0	0	0	0	0	21.4424	1	1	57.5363	36.8947
DATA	816	10	51	0	0	A_64_P011894	NM_001004210	11161.1	249.969	2.390413e+004	2.390415e+003	23404	38	9.708049e+000	0	0	0	0	0	0	23182.6	1	1	46.5243	37.0606
DATA	817	10	52	0	0	A_42_P717654	XM_001063683	11186.3	250.338	3.974070e+003	3.974194e+002	3861.5	35	9.403103e+000	0	0	0	0	0	0	3862.14	1	1	48.5334	36.9487
DATA	818	10	53	0	0	A_64_P006102	NM_001100784	11211.8	250.5	4.329594e+002	4.340917e+001	488	38	9.572008e+000	0	0	0	0	0	0	421.539	1	1	48.5334	39.04
DATA	819	10	54	0	0	A_64_P116038	NM_001000335	11236.6	250.479	1.603822e+001	3.515664e+000	86	35	8.612869e+000	0	0	0	0	0	0	15.639	1	1	48.2044	37.2286
DATA	820	10	55	0	0	A_42_P581567	NM_001011899	11262.6	250.427	1.663281e+002	1.692372e+001	235	39.5	7.967522e+000	0	0	0	0	0	0	162.403	1	1	57.5363	40.425
DATA	821	10	56	0	0	A_42_P671206	FQ231880	11287.9	250.526	2.151389e+003	2.151616e+002	2172	42	9.108541e+000	0	0	0	0	0	0	2102.73	1	1	50.1463	41.4138
DATA	823	10	58	0	0	A_64_P078205	NM_001044255	11338.8	250.379	6.045743e+003	6.045823e+002	5902	40	1.129997e+001	0	0	0	0	0	0	5915.69	1	1	45.4864	42.2424
DATA	824	10	59	66	-1	(-)3xSLv1	NegativeControl	11364.3	250.5	3.128441e+000	3.117347e+000	69	39.5	8.965836e+000	0	0	0	0	0	0	-1.99445	0	0	57.5363	39.4
DATA	825	10	60	0	0	A_44_P259051	NM_001037658	11389.7	250.414	6.844594e+002	6.851692e+001	749.5	37	8.319216e+000	0	0	0	0	0	0	669.678	1	1	47.8731	37.931
DATA	826	10	61	0	0	A_64_P325262	A_64_P325262	11414.9	250.5	2.993748e+001	4.323690e+000	101.5	40	9.505220e+000	0	0	0	0	0	0	29.276	1	1	56.9804	42.1429
DATA	827	10	62	0	0	A_64_P140005	NM_001191804	11440.1	250.889	1.821918e+001	3.614826e+000	91	36	9.169783e+000	0	0	0	0	0	0	17.8022	1	1	45.4864	37.5278
DATA	828	10	63	0	0	A_42_P588606	NM_001134544	11465.7	250.3	1.776910e+002	1.804196e+001	242.5	39	8.597480e+000	0	0	0	0	0	0	173.412	1	1	47.2035	38.6667
DATA	829	10	64	0	0	A_42_P788541	NM_001106794	11491.1	250.662	5.078757e+003	5.078854e+002	5238	32	1.044904e+001	0	0	0	0	0	0	4949.09	1	1	45.4864	33.4815
DATA	830	10	65	0	0	A_44_P1050200	NM_001108000	11516.6	250.671	4.178140e+002	4.189895e+001	467	28	6.919313e+000	0	0	0	0	1	0	406.391	1	1	49.5074	28.2424
DATA	831	10	66	0	0	A_42_P777935	ENSRNOT00000027369	11541.9	250.5	1.656026e+002	1.685594e+001	222	32	1.460879e+001	0	0	0	0	0	0	160.719	1	1	56.9804	35.8
DATA	832	10	67	0	0	A_44_P349475	NM_031333	11567.4	250.645	6.526569e+002	6.534173e+001	706.5	39	1.862762e+001	0	0	0	0	0	0	631.792	1	1	49.8279	44.6071
DATA	833	10	68	0	0	A_64_P136188	XM_001059617	11592.6	250.573	4.452942e+002	4.464144e+001	505	42	1.310303e+001	0	0	0	0	0	0	429.814	1	1	57.5363	40.4242
DATA	834	10	69	0	0	A_64_P023386	NM_001106232	11618.1	250.5	3.483420e+004	3.483421e+003	32346	40	1.052677e+001	0	0	0	0	0	0	33512.6	1	1	56.9804	37.7931
DATA	835	10	70	0	0	A_64_P048576	NM_001000163	11643.4	250.628	1.055224e+002	1.102168e+001	171.5	36	9.170346e+000	0	0	0	0	0	0	101.154	1	1	50.7771	36
DATA	836	10	71	1028	1	(+)E1A_r60_a20	E1A_r60_a20	11668.7	250.5	9.382185e+001	9.911333e+000	161.5	34	1.198861e+001	0	0	0	1	0	0	89.5783	1	1	57.5363	36.32
DATA	837	10	72	0	0	A_64_P078510	XM_001053102	11693.3	251.068	3.519092e+002	3.533689e+001	426	43.5	1.229505e+001	0	0	0	0	0	0	334.593	1	1	43.7019	43.5556
DATA	838	10	73	0	0	A_64_P101533	A_64_P101533	11719.6	250.573	3.235976e+000	3.224501e+000	70	35	9.512675e+000	0	0	0	0	0	0	-1.69856	0	0	65	35.8108
DATA	839	10	74	0	0	A_64_P164601	ENSRNOT00000050537	11744.8	250.542	8.011813e+001	8.642520e+000	149	37	9.710684e+000	0	0	0	0	0	0	75.413	1	1	47.8731	37.6563
DATA	840	10	75	0	0	A_42_P694928	NM_001109046	11770.2	250.824	3.742232e+002	3.756394e+001	416	36	8.874759e+000	0	0	0	0	0	0	350.328	1	1	48.2044	36.0571
DATA	841	10	76	0	0	A_42_P510565	ENSRNOT00000046259	11796	251.226	4.060775e+003	4.060908e+002	3884	37	1.000000e+001	0	0	0	1	0	0	3779.04	1	1	45.4864	38
DATA	842	10	77	0	0	A_64_P050877	XM_001081816	11821.4	250.573	1.280684e+001	3.538826e+000	85	38	9.343389e+000	0	0	0	0	0	0	11.8429	1	0	57.5363	37.9677
DATA	843	10	78	0	0	A_44_P281352	NM_001013076	11846.6	250.573	3.662177e+002	3.677202e+001	408	38	8.824177e+000	0	0	0	0	0	0	336.431	1	1	57.5363	37.5926
DATA	844	10	79	0	0	A_44_P269675	ENSRNOT00000031839	11871.8	250.753	5.401975e+002	5.412315e+001	560.5	40	7.358518e+000	0	0	0	0	0	0	492.832	1	1	48.8603	38.8276
DATA	845	10	80	66	1	DarkCorner	DarkCorner	11897.2	250.863	3.380621e+000	3.368632e+000	73	37	7.180828e+000	0	0	0	0	0	0	-2.69672	0	0	50.7771	39.25
DATA	846	10	81	66	1	DarkCorner	DarkCorner	11922.7	250.884	3.407187e+000	3.395105e+000	64	38	1.088595e+001	0	0	0	0	0	0	-9.91826	0	0	46.1809	40.1944
DATA	847	10	82	66	1	DarkCorner	DarkCorner	11947.9	251.215	3.434690e+000	3.422510e+000	73	34	9.144902e+000	0	0	0	0	0	0	-1.31049	0	0	45.835	36.3529
DATA	848	10	83	66	1	DarkCorner	DarkCorner	11973.4	250.635	3.464557e+000	3.452271e+000	71.5	33	6.728653e+000	0	0	0	0	0	0	-3.82183	0	0	48.8603	32.9459
DATA	849	10	84	66	1	DarkCorner	DarkCorner	11998.8	250.958	3.495473e+000	3.483078e+000	74.5	32	7.524367e+000	0	0	0	0	0	0	-1.59127	0	0	46.8651	34.2667
DATA	850	10	85	66	1	DarkCorner	DarkCorner	12024.2	250.843	1.511873e+001	3.826957e+000	89.5	33	8.959033e+000	0	0	0	1	0	0	13.119	1	0	46.5243	33.4122
DATA	851	11	1	66	1	DarkCorner	DarkCorner	9878.43	256.676	3.552788e+000	3.540610e+000	70	31	8.415231e+000	0	0	0	0	0	0	0.470513	0	0	46.8651	31.0842
DATA	852	11	2	66	1	DarkCorner	DarkCorner	9903.96	256.245	3.571066e+000	3.558402e+000	55.5	37	9.229919e+000	0	0	0	0	0	0	-12.6741	0	0	54.1152	36.4839
DATA	853	11	3	66	1	DarkCorner	DarkCorner	9929.4	256.521	3.587034e+000	3.574314e+000	57	35	8.772758e+000	0	0	0	0	0	0	-10.094	0	0	48.5334	34.8065
DATA	854	11	4	66	1	DarkCorner	DarkCorner	9954.8	256.582	3.600699e+000	3.587931e+000	61	38	1.157301e+001	0	0	0	0	0	0	-7.79883	0	0	50.4627	37.4688
DATA	855	11	5	66	1	DarkCorner	DarkCorner	9980.42	256.427	3.612256e+000	3.599447e+000	61	31	6.739680e+000	0	0	0	0	0	0	-7.45326	0	0	65	31.6429
DATA	856	11	6	66	1	DarkCorner	DarkCorner	10005.7	256.5	3.621568e+000	3.608725e+000	58	36	7.362374e+000	0	0	0	0	0	0	-10.1576	0	0	57.5363	36.2727
DATA	857	11	7	0	0	A_64_P077381	A_64_P077381	10030.6	256.865	1.373860e+001	3.868143e+000	80	31	6.843975e+000	0	0	0	0	0	0	11.5908	1	0	48.5334	31.56
DATA	858	11	8	0	0	A_64_P085926	NM_030860	10056.5	256.769	1.305884e+003	1.306386e+002	1167	34	1.200308e+001	0	0	0	0	0	0	1100.06	1	1	49.8279	36.9231
DATA	859	11	9	0	0	A_42_P598560	NM_001033693	10081.9	256.5	1.440091e+003	1.440547e+002	1250.5	32	1.296816e+001	0	0	0	0	0	0	1211.95	1	1	49.8279	33.3929
DATA	860	11	10	0	1	ETG08_142674	ETG08_142674	10107.4	256.573	9.362288e+000	3.745577e+000	75	34	6.169633e+000	0	0	0	0	0	0	7.87527	1	0	65	33.2667
DATA	861	11	11	0	0	A_42_P724142	NM_001106340	10132.7	256.853	1.354509e+003	1.354994e+002	1220	33.5	6.752777e+000	0	0	0	0	0	0	1139.35	1	1	45.835	33
DATA	862	11	12	0	0	A_64_P054193	NM_001014193	10158	256.545	3.867446e+004	3.867448e+003	32471.5	36.5	7.641089e+000	0	0	0	0	0	0	32545	1	1	55.8519	36.3571
DATA	863	11	13	0	0	A_42_P750554	NM_001107846	10183.6	256.878	2.602389e+003	2.602641e+002	2230	35	6.117488e+000	0	0	0	0	0	0	2191.8	1	1	48.5334	34.9032
DATA	864	11	14	0	0	A_44_P285547	NM_053393	10208.6	257.265	9.941960e+001	1.057972e+001	153	34.5	6.269405e+000	0	0	0	0	0	0	83.8359	1	1	46.5243	34.7188
DATA	865	11	15	0	0	A_42_P623374	NM_138845	10234.2	257.323	1.829284e+003	1.829641e+002	1583	36	9.419669e+000	0	0	0	0	0	0	1545.04	1	1	45.4864	36.8889
DATA	866	11	16	0	0	A_64_P064888	NM_001127303	10259.4	257.292	1.983224e+002	2.015721e+001	232	40	9.876486e+000	0	0	0	0	0	0	167.831	1	1	45.4864	40.7143
DATA	867	11	17	0	0	A_44_P522406	NM_001001103	10285	257.197	3.107084e+001	4.752881e+000	95	35	9.381212e+000	0	0	0	0	0	0	26.3541	1	1	46.1809	37.4118
DATA	868	11	18	0	0	A_42_P660129	NM_130422	10310.4	256.573	5.732138e+001	6.762173e+000	116	38	8.360043e+000	0	0	0	0	0	0	48.7447	1	1	57.5363	36.9032
DATA	869	11	19	0	0	A_64_P035679	A_64_P035679	10335.6	256.573	6.113912e+004	6.113913e+003	51601	37	1.199887e+001	0	0	0	0	0	0	52138.5	1	1	57.5363	39.4828
DATA	870	11	20	0	0	A_64_P118862	NM_001191999	10361.1	257.328	1.223819e+002	1.274716e+001	172.5	38	1.111731e+001	0	0	0	0	0	0	104.694	1	1	45.1352	39.7353
DATA	871	11	21	0	0	A_42_P638181	NM_133395	10386.6	257	1.137684e+004	1.137689e+003	9546	37	7.496746e+000	0	0	0	1	0	0	9765.34	1	1	48.5334	36.4865
DATA	872	11	22	0	0	A_44_P423803	NM_031144	10412.2	257.211	2.033241e+004	2.033244e+003	17065.5	38.5	9.191568e+000	0	0	0	0	0	0	17515.3	1	1	47.5395	39.0278
DATA	874	11	24	0	0	A_44_P445195	NM_133300	10462.7	257.12	1.738056e+003	1.738411e+002	1562.5	38	9.090216e+000	0	0	0	0	0	0	1508.77	1	1	48.8603	38.1818
DATA	875	11	25	0	0	A_42_P563276	NM_013093	10488.3	256.971	4.016335e+002	4.031554e+001	416	37	9.462883e+000	0	0	0	0	0	0	350.095	1	1	46.1809	35.8846
DATA	876	11	26	0	0	A_42_P535608	NM_001107160	10513.5	257	1.522284e+002	1.561667e+001	208	33	1.015612e+001	0	0	0	0	0	0	133.254	1	1	54.1152	36.5357
DATA	877	11	27	0	0	A_44_P233080	ENSRNOT00000026303	10538.9	256.988	6.076258e+003	6.076358e+002	5233	33	9.848508e+000	0	0	0	0	0	0	5342.16	1	1	50.7771	34.8
DATA	878	11	28	0	0	A_43_P13320	NM_138880	10563.9	257.25	1.321189e+001	3.698661e+000	79	37	6.379279e+000	0	0	0	0	0	0	11.6669	1	0	44.0646	35.8378
DATA	879	11	29	0	0	A_42_P548007	NM_001135020	10589.8	257.116	1.177399e+004	1.177404e+003	10081	38	8.308160e+000	0	0	0	0	0	0	10445.3	1	1	46.5243	37.5946
DATA	880	11	30	0	0	A_44_P282853	NM_031983	10615.2	257.236	3.473771e+003	3.473939e+002	3105	37	1.081695e+001	0	0	0	0	0	0	3096.01	1	1	47.5395	38.7222
DATA	881	11	31	0	0	A_42_P552341	NM_053519	10640.7	257.333	1.286349e+003	1.286801e+002	1206	34.5	9.225611e+000	0	0	0	0	0	0	1151.83	1	1	46.8651	36.2813
DATA	882	11	32	0	0	A_64_P031476	NM_001107172	10665.9	257.459	1.738748e+002	1.771508e+001	226	34	8.215107e+000	0	0	0	0	0	0	156.417	1	1	43.3362	35.1081
DATA	883	11	33	0	0	A_42_P620762	NM_024403	10691.2	257.203	1.390501e+004	1.390505e+003	12741	38	8.199826e+000	0	0	0	0	0	0	12567.6	1	1	45.1352	38.3478
DATA	884	11	34	0	0	A_64_P135370	A_64_P135370	10716.5	257.352	4.849272e+002	4.860895e+001	511	37	8.009786e+000	0	0	0	0	0	0	440.34	1	1	57.5363	36.64
DATA	885	11	35	0	0	A_42_P576202	NM_001108583	10742.1	257.382	1.309762e+003	1.310189e+002	1218	38.5	1.023989e+001	0	0	0	0	0	0	1194.94	1	1	46.1809	39.8462
DATA	886	11	36	0	0	A_64_P022879	NM_001109019	10767.3	257.486	4.015829e+001	5.215837e+000	107	34.5	8.411541e+000	0	0	0	0	0	0	36.8075	1	1	48.2044	34.9333
DATA	887	11	37	0	0	A_42_P711589	NM_022948	10792.9	257.352	7.198012e+003	7.198089e+002	6683	34	8.389308e+000	0	0	0	0	0	0	6627.9	1	1	47.8731	34.3415
DATA	888	11	38	0	0	A_64_P007244	A_64_P007244	10818	257.5	7.909190e+003	7.909259e+002	7324	37	7.217403e+000	0	0	0	0	0	0	7315.42	1	1	49.8279	37.1818
DATA	889	11	39	0	0	A_42_P477625	NM_001108719	10843.5	257.5	5.030092e+003	5.030200e+002	4779	39	6.087013e+000	0	0	0	0	0	0	4673.25	1	1	49.1849	39.8621
DATA	890	11	40	0	0	A_64_P153091	XM_341223	10868.7	257.607	9.267705e+002	9.273471e+001	899	36	9.525380e+000	0	0	0	0	0	0	864.746	1	1	52.0157	38.0938
DATA	891	11	41	0	0	A_64_P016347	NM_130819	10894.4	257.427	1.030753e+001	3.414759e+000	79	33	7.768976e+000	0	0	0	0	0	0	9.65901	1	0	57.5363	34.0968
DATA	892	11	42	0	0	A_42_P495598	NM_001014026	10919.6	257.427	1.131448e+001	3.433986e+000	82	38	8.307592e+000	0	0	0	0	0	0	10.6459	1	0	57.5363	36.4667
DATA	893	11	43	0	0	A_42_P759043	NM_001134509	10945	257.5	7.848330e+002	7.854971e+001	781.5	39.5	1.264729e+001	0	0	0	0	0	0	741.406	1	1	48.5334	40.3333
DATA	894	11	44	0	0	A_64_P071595	XM_002728361	10970.3	257.25	1.561603e+001	3.576054e+000	87	37	1.107910e+001	0	0	0	0	0	0	14.8082	1	0	47.8731	38.1481
DATA	895	11	45	0	0	A_42_P780882	NM_001008511	10995.9	257.621	7.882975e+003	7.883041e+002	7390.5	36.5	9.331914e+000	0	0	0	0	0	0	7503.02	1	1	45.4864	38.7308
DATA	896	11	46	0	0	A_64_P044420	NM_001134983	11021.3	257.959	9.931482e+001	1.043243e+001	163	33	7.547287e+000	0	0	0	0	0	0	94.8597	1	1	48.8603	34.1923
DATA	897	11	47	0	0	A_64_P000596	NM_001025732	11046.9	257.662	4.374308e+003	4.374424e+002	4232	37.5	9.800540e+000	0	0	0	0	0	0	4191.97	1	1	45.4864	38.8667
DATA	898	11	48	0	0	A_44_P468873	ENSRNOT00000015693	11072.3	257.5	3.155109e+001	4.474998e+000	101	41	9.796143e+000	0	0	0	0	0	0	30.3301	1	1	57.5363	39.6522
DATA	900	11	50	0	0	A_42_P727022	NM_001107076	11122.9	257.582	1.573052e+004	1.573055e+003	14877	37	9.506577e+000	0	0	0	0	0	0	15206.1	1	1	46.1809	36.125
DATA	901	11	51	0	0	A_64_P135604	NM_001009641	11148.4	257.61	3.490302e+003	3.490444e+002	3495.5	40	1.017300e+001	0	0	0	0	0	0	3382.26	1	1	49.8279	38.4815
DATA	902	11	52	0	0	A_42_P813939	NM_001108741	11173.6	257.437	2.385916e+003	2.386123e+002	2361	37	9.092470e+000	0	0	0	0	0	0	2317.14	1	1	47.8731	37.1111
DATA	903	11	53	0	0	A_64_P052494	A_64_P052494	11199.1	257.5	6.475672e+000	3.201195e+000	79	37	9.425546e+000	0	0	0	0	0	0	6.30142	1	0	65	38.8182
DATA	904	11	54	0	0	A_44_P323678	NM_001107651	11223.8	257.753	1.648033e+001	3.537160e+000	89	33.5	8.896661e+000	0	0	0	0	0	0	16.0637	1	1	51.0895	35.2333
DATA	905	11	55	0	0	A_44_P435764	NM_001191810	11249.5	257.565	3.136353e+000	3.131802e+000	75	37	8.335941e+000	0	0	0	0	0	0	1.9793	0	0	47.2035	38.1579
DATA	906	11	56	0	0	A_42_P688320	NM_001108569	11275.4	257.957	2.856426e+002	2.873431e+001	346	40	7.936712e+000	0	0	0	0	0	0	279.163	1	1	46.5243	39.5161
DATA	907	11	57	0	0	A_42_P798500	NM_001014023	11300.7	257.622	6.434185e+002	6.441739e+001	699	36	8.784521e+000	0	0	0	0	0	0	629.359	1	1	51.0895	36.7333
DATA	908	11	58	0	0	A_44_P279083	NM_133401	11326	257.545	2.725252e+002	2.743020e+001	343	39	9.694895e+000	0	0	0	0	0	0	266.724	1	1	55.8519	39.1892
DATA	909	11	59	0	0	A_64_P129850	NM_001002855	11351.4	257.573	2.204163e+001	3.816873e+000	95	40	7.915549e+000	0	0	0	0	0	0	21.5786	1	1	57.5363	40.4516
DATA	910	11	60	0	0	A_64_P029468	NM_001105784	11376.6	257.808	2.329030e+001	3.890340e+000	96	39.5	1.048934e+001	0	0	0	0	0	0	22.8008	1	1	48.2044	39.8846
DATA	911	11	61	0	0	A_43_P18571	NM_001013965	11402.2	257.761	5.841854e+002	5.850165e+001	643	42.5	9.958910e+000	0	0	0	0	0	0	571.711	1	1	46.8651	42.0714
DATA	912	11	62	0	1	ERCC-00104_60	ERCC-00104_60	11426.9	257.896	1.278891e+001	3.371179e+000	86	37.5	9.499206e+000	0	0	0	0	0	0	12.5079	1	0	46.8651	38.2222
DATA	913	11	63	0	0	A_44_P653701	NM_001106536	11453	257.545	2.053898e+002	2.077497e+001	275	38	9.531046e+000	0	0	0	0	0	0	200.67	1	1	55.8519	39.2162
DATA	914	11	64	0	0	A_64_P093593	NM_001107077	11478.4	258.152	3.402244e+002	3.416578e+001	414	40.5	6.713848e+000	0	0	0	0	0	0	331.981	1	1	45.4864	38.8636
DATA	915	11	65	0	0	A_44_P1034793	NM_001008300	11503.6	257.573	6.461828e+002	6.469412e+001	691.5	29	8.823070e+000	0	0	0	0	1	0	629.461	1	1	57.5363	29.9286
DATA	916	11	66	0	0	A_42_P768355	NM_057130	11529.7	258.138	3.897771e+002	3.910382e+001	453	27	6.777096e+000	0	0	0	1	1	0	378.924	1	1	42.9674	26.9355
DATA	917	11	67	0	0	A_44_P714581	NM_001107480	11554.5	257.648	5.587247e+003	5.587335e+002	5245.5	32	8.157410e+000	0	0	0	0	0	0	5418.97	1	1	57.5363	32.28
DATA	918	11	68	0	0	A_64_P084521	NM_019351	11579.9	258.328	5.214913e+003	5.215008e+002	4969	42	1.477912e+001	0	0	0	0	0	0	5044.46	1	1	45.1352	43.1212
DATA	919	11	69	0	0	A_42_P562625	NM_131913	11605.7	258.132	1.954974e+003	1.955230e+002	1976	42.5	9.528180e+000	0	0	0	0	0	0	1885.16	1	1	45.835	41.2
DATA	920	11	70	0	0	A_42_P468662	NM_001108886	11630.8	258	1.423567e+003	1.423921e+002	1430	38	1.116092e+001	0	0	0	0	0	0	1368.08	1	1	46.8651	36.6154
DATA	921	11	71	0	0	A_42_P778587	NM_001135767	11656.4	257.931	4.240565e+002	4.252521e+001	466.5	40	1.968949e+001	0	0	0	0	0	0	405.968	1	1	53.8203	44.25
DATA	922	11	72	0	0	A_64_P139957	NM_001008525	11681.7	258.106	1.816882e+004	1.816885e+003	17283	41	1.340334e+001	0	0	0	0	0	0	17322.1	1	1	45.835	42.129
DATA	923	11	73	0	0	A_44_P318402	NM_001000187	11707	258	9.746359e+001	1.026270e+001	168	37	9.442651e+000	0	0	0	0	0	0	92.5023	1	1	54.9904	37.9459
DATA	924	11	74	0	0	A_64_P090359	NM_001033565	11732.5	258	1.444810e+001	3.538542e+000	88	35	8.956830e+000	0	0	0	0	0	0	13.6453	1	0	54.1152	37.0313
DATA	925	11	75	0	0	A_43_P17778	NM_001134991	11757.4	258.088	2.356398e+001	4.011844e+000	97	36	7.245279e+000	0	0	0	0	0	0	22.1398	1	1	46.8651	37.6957
DATA	926	11	76	0	0	A_64_P093176	A_64_P093176	11783.1	258.065	5.454596e+001	6.357356e+000	127	38	1.086700e+001	0	0	0	0	0	0	50.9575	1	1	54.4085	39.2703
DATA	927	11	77	0	0	A_64_P100123	NM_182821	11808.3	258.25	5.296235e+003	5.296337e+002	4959.5	38	9.596130e+000	0	0	0	0	0	0	4918.37	1	1	47.5395	38.1667
DATA	928	11	78	0	0	A_44_P426660	NM_001135717	11833.6	258.227	1.730271e+001	3.731480e+000	90	38.5	9.816302e+000	0	0	0	0	0	0	15.966	1	1	45.835	39.2857
DATA	929	11	79	0	0	A_42_P696084	NM_031022	11859.2	258.356	2.162883e+003	2.163139e+002	2045	38	9.117159e+000	0	0	0	0	0	0	1982.21	1	1	48.5334	38.4516
DATA	930	11	80	66	1	DarkCorner	DarkCorner	11884.5	258.352	3.364442e+000	3.352511e+000	69	38.5	8.251043e+000	0	0	0	0	0	0	-4.59625	0	0	57.5363	38.0833
DATA	931	11	81	66	1	DarkCorner	DarkCorner	11909.6	258.413	3.389565e+000	3.377545e+000	66	38	8.356159e+000	0	0	0	0	0	0	-7.78265	0	0	45.1352	39.0556
DATA	932	11	82	66	1	DarkCorner	DarkCorner	11935.5	258.352	3.417100e+000	3.404982e+000	68	40	1.112402e+001	0	0	0	0	0	0	-7.29602	0	0	57.5363	39.3793
DATA	933	11	83	66	1	DarkCorner	DarkCorner	11960.8	258.508	3.445445e+000	3.433227e+000	71	35.5	7.263521e+000	0	0	0	0	0	0	-4.71366	0	0	42.9674	36.6111
DATA	934	11	84	66	1	DarkCorner	DarkCorner	11986.4	258.427	3.475732e+000	3.463406e+000	70	33	6.874670e+000	0	0	0	0	0	0	-4.84433	0	0	57.5363	34.2414
DATA	935	11	85	66	1	DarkCorner	DarkCorner	12011.4	258.104	3.506988e+000	3.494552e+000	72.5	34	9.165643e+000	0	0	0	0	0	0	-2.14877	0	0	45.835	36.8649
DATA	936	12	1	66	1	DarkCorner	DarkCorner	9891.42	263.573	3.563221e+000	3.550585e+000	62	34	8.527981e+000	0	0	0	0	0	0	-4.85005	0	0	57.5363	33.814
DATA	937	12	2	66	1	DarkCorner	DarkCorner	9916.75	263.5	3.580121e+000	3.567425e+000	58	37.5	8.640681e+000	0	0	0	0	0	0	-9.03618	0	0	45.835	36.0714
DATA	938	12	3	66	1	DarkCorner	DarkCorner	9941.9	264.082	3.594716e+000	3.581968e+000	60	39	1.061553e+001	0	0	0	0	0	0	-8.52752	0	0	46.8651	37.5758
DATA	939	12	4	66	1	DarkCorner	DarkCorner	9967.5	263.648	3.607250e+000	3.594458e+000	63	34	8.840035e+000	0	0	0	0	0	0	-6.05366	0	0	57.5363	34.9714
DATA	940	12	5	66	1	DarkCorner	DarkCorner	9993	263.545	3.617607e+000	3.604778e+000	62	35	7.248297e+000	0	0	0	0	0	0	-6.44661	0	0	55.8519	34.8571
DATA	941	12	6	0	0	A_64_P118227	XM_002728056	10018.5	263.648	1.953023e+001	4.107110e+000	82	35	6.887335e+000	0	0	0	0	0	0	16.4903	1	1	57.5363	36.3462
DATA	942	12	7	0	0	A_64_P051317	NM_130425	10043.6	263.573	1.405915e+002	1.451752e+001	185.5	30.5	9.630199e+000	0	0	0	0	0	0	118.505	1	1	57.5363	33
DATA	943	12	8	0	0	A_42_P756350	NM_021772	10069.4	263.596	8.698409e+001	9.423007e+000	143	31	1.170592e+001	0	0	0	0	0	0	73.2299	1	1	65	33.5185
DATA	944	12	9	0	0	A_42_P816479	NM_022278	10094.3	264	1.198246e+004	1.198251e+003	10012.5	34	7.959710e+000	0	0	0	0	0	0	10080.8	1	1	49.1849	34.9032
DATA	945	12	10	0	0	A_64_P351634	NM_001029901	10119.9	264.269	2.650699e+002	2.675399e+001	291	31	6.110437e+000	0	0	0	0	0	0	222.95	1	1	45.835	31.1379
DATA	946	12	11	0	0	A_64_P136597	A_64_P136597	10145.3	264.048	4.292999e+002	4.308286e+001	427	36.5	8.428249e+000	0	0	0	0	0	0	361.166	1	1	44.4243	37.3462
DATA	947	12	12	0	0	A_64_P052017	ENSRNOT00000033592	10170.5	264	3.417578e+001	4.981159e+000	97	35	8.265981e+000	0	0	0	0	0	0	28.7703	1	1	54.1152	35.8667
DATA	948	12	13	0	0	A_44_P444485	TC589779	10196.2	264.236	2.509691e+003	2.509952e+002	2098	35	4.899660e+000	0	0	0	0	0	0	2115	1	1	47.5395	34.56
DATA	949	12	14	0	0	A_44_P147373	XM_226249	10221.3	264.25	1.813236e+003	1.813596e+002	1592	35	7.950829e+000	0	0	0	0	0	0	1530.25	1	1	47.5395	35.7647
DATA	950	12	15	0	0	A_64_P059939	NM_001134540	10247	264	3.826207e+004	3.826208e+003	31095	40	1.111722e+001	0	0	0	0	0	0	32349.1	1	1	54.9904	40.1481
DATA	951	12	16	0	0	A_42_P637279	NM_012743	10272.1	264.016	1.339631e+001	3.841820e+000	79	36	9.482740e+000	0	0	0	0	0	0	11.3499	1	0	44.7812	38.1212
DATA	952	12	17	0	0	A_42_P771570	XM_001080365	10297.6	264.014	4.573968e+002	4.588050e+001	451	38	8.413375e+000	0	0	0	0	0	0	388.477	1	1	47.2035	36.7429
DATA	953	12	18	0	0	A_43_P12942	NM_053817	10323.2	264.183	9.002487e+003	9.002558e+002	7638	36	8.085247e+000	0	0	0	0	0	0	7667.13	1	1	47.2035	36.0606
DATA	954	12	19	0	0	A_64_P053307	NM_001191900	10348.3	264.329	1.898485e+001	4.044633e+000	85	38.5	1.418727e+001	0	0	0	0	0	0	16.2167	1	1	49.5074	41.9167
DATA	955	12	20	0	0	A_42_P595630	NM_001013189	10373.8	264.333	6.971840e+003	6.971931e+002	5959.5	38	8.079907e+000	0	0	0	0	0	0	5974.77	1	1	45.4864	36.8519
DATA	956	12	21	0	0	A_64_P154760	A_64_P154760	10399.4	264.427	5.645618e+002	5.656752e+001	548	34	7.889356e+000	0	0	0	0	0	0	485.522	1	1	57.5363	35.625
DATA	957	12	22	0	0	A_42_P764359	NM_145086	10424.7	264.373	1.304973e+003	1.305451e+002	1146	36	1.012669e+001	0	0	0	0	0	0	1126.4	1	1	46.1809	36.6296
DATA	958	12	23	0	0	A_43_P10405	NM_001109257	10450	264.455	5.312159e+001	6.372940e+000	117	38	9.674789e+000	0	0	0	0	0	0	46.0294	1	1	55.8519	37.8077
DATA	959	12	24	0	0	A_44_P269950	ENSRNOT00000014054	10475.5	264.352	3.290612e+001	4.808688e+000	97	30.5	9.249266e+000	0	0	0	0	0	0	28.6285	1	1	57.5363	32.625
DATA	960	12	25	0	0	A_44_P160763	NM_001106513	10500.6	264.427	1.268808e+002	1.315985e+001	182	32	8.059111e+000	0	0	0	0	0	0	110.844	1	1	57.5363	33.0833
DATA	961	12	26	0	0	A_64_P127678	NM_001008553	10526.1	264.104	1.142409e+003	1.142938e+002	1058	31	8.728029e+000	0	0	0	0	0	0	1002.34	1	1	46.8651	33.6129
DATA	962	12	27	0	0	A_42_P684885	NM_133517	10551.6	264.427	1.736040e+001	3.872481e+000	84	33	8.716352e+000	0	0	0	0	0	0	15.2997	1	1	57.5363	33.3438
DATA	963	12	28	0	0	A_64_P102708	NM_001034149	10577	264.455	2.464078e+001	4.236300e+000	90	37	5.761214e+000	0	0	0	0	0	0	21.8142	1	1	65	35.3721
DATA	964	12	29	0	0	A_42_P547629	NM_001106718	10602.4	264.427	5.748256e+002	5.758481e+001	556	39	9.528481e+000	0	0	0	0	0	0	511.225	1	1	57.5363	38.3667
DATA	965	12	30	0	0	A_42_P522285	NM_001044263	10627.5	264.571	3.958537e+002	3.973236e+001	412	33	7.812825e+000	0	0	0	0	0	0	353.676	1	1	49.8279	34.1667
DATA	966	12	31	0	0	A_64_P164423	NM_057193	10652.9	264.806	3.831815e+001	5.121804e+000	102	32	7.754746e+000	0	0	0	0	0	0	34.3958	1	1	46.1809	33.8438
DATA	967	12	32	0	0	A_44_P256143	NM_001047917	10678.5	264.688	1.457963e+002	1.496685e+001	206	35.5	8.099930e+000	0	0	0	0	0	0	131.494	1	1	45.1352	33.5625
DATA	968	12	33	0	0	A_44_P727294	NM_001160314	10704.1	264.621	2.933177e+003	2.933371e+002	2637	35.5	7.718509e+000	0	0	0	0	0	0	2657.97	1	1	45.4864	34.1538
DATA	969	12	34	0	0	A_64_P108404	NM_001000092	10729.3	264.813	5.468412e+001	6.413410e+000	115	38	9.451631e+000	0	0	0	0	0	0	49.7848	1	1	45.1352	40.4
DATA	970	12	35	0	0	A_44_P520829	NM_001108777	10754.8	264.644	7.306293e+002	7.313902e+001	724.5	37	8.563488e+000	0	0	0	0	0	0	668.287	1	1	48.5334	37.2
DATA	971	12	36	0	0	A_44_P229677	NM_001014221	10780.2	264.591	1.307043e+003	1.307464e+002	1270	33	8.175220e+000	0	0	0	0	0	0	1201.07	1	1	46.1809	33.8824
DATA	972	12	37	0	0	A_64_P126215	A_64_P126215	10805.5	264.5	1.246720e+001	3.532147e+000	82	36.5	7.660053e+000	0	0	0	0	0	0	11.5084	1	0	57.5363	36.9688
DATA	973	12	38	0	0	A_64_P090035	A_64_P090035	10830.8	265.056	2.127048e+003	2.127303e+002	2082	35	6.605057e+000	0	0	0	0	0	0	1972.29	1	1	46.8651	35.3704
DATA	974	12	39	0	0	A_64_P089330	ENSRNOT00000012374	10856.1	264.91	1.602607e+002	1.635740e+001	220	38	7.439323e+000	0	0	0	0	0	0	149.254	1	1	46.5243	38.1842
DATA	975	12	40	0	0	A_44_P454429	NM_012712	10881.3	265.172	1.274546e+002	1.315618e+001	195	33	6.411005e+000	0	0	0	0	0	0	119.21	1	1	42.9674	34.3793
DATA	976	12	41	0	1	ERCC-00144_60	ERCC-00144_60	10906.9	264.971	1.410364e+001	3.540962e+000	85	36	9.677006e+000	0	0	0	0	0	0	13.2468	1	0	46.8651	35.8889
DATA	977	12	42	0	0	A_42_P759843	XR_086347	10932.6	264.843	3.281054e+003	3.281213e+002	3169.5	35	8.307310e+000	0	0	0	0	0	0	3094.38	1	1	47.5395	34.3704
DATA	978	12	43	0	0	A_43_P14264	NM_053653	10957.9	264.757	7.954976e+002	7.961499e+001	810	39	1.133604e+001	0	0	0	0	0	0	753.165	1	1	46.5243	38.6667
DATA	979	12	44	0	0	A_64_P011223	NM_024353	10983.4	264.573	4.802097e+002	4.812814e+001	545	37.5	1.053587e+001	0	0	0	0	0	0	456.372	1	1	57.5363	38.2692
DATA	980	12	45	0	0	A_42_P701169	NM_001109572	11008.6	265	1.935424e+003	1.935688e+002	1890	38	9.428743e+000	0	0	0	0	0	0	1845.94	1	1	45.4864	37.913
DATA	981	12	46	0	0	A_64_P143307	NM_001014106	11034	264.545	2.847404e+002	2.865192e+001	340	38	1.019089e+001	0	0	0	0	0	0	272.498	1	1	55.8519	38.6667
DATA	982	12	47	0	0	A_44_P480636	NM_001005381	11059.6	265.274	2.826039e+002	2.843844e+001	344	37	8.273804e+000	0	0	0	0	0	0	271.339	1	1	44.0646	38.0741
DATA	983	12	48	0	0	A_64_P163564	ENSRNOT00000010609	11084.5	265.294	8.235788e+001	8.824054e+000	152	41	1.140506e+001	0	0	0	0	0	0	79.3092	1	1	46.8651	40.6538
DATA	984	12	49	0	0	A_42_P774028	NM_001017447	11110.4	264.954	3.356197e+003	3.356346e+002	3270	35	1.000480e+001	0	0	0	0	0	0	3241.17	1	1	45.1352	34.8966
DATA	985	12	50	0	0	A_43_P20110	ENSRNOT00000050558	11135.4	265.177	3.301917e+001	4.564058e+000	103.5	38	9.477702e+000	0	0	0	0	0	0	31.969	1	1	44.0646	38.2727
DATA	986	12	51	0	0	A_44_P552865	NM_001170399	11161	265.203	7.912431e+002	7.918673e+001	847	37	8.808903e+000	0	0	0	0	0	0	767.892	1	1	45.4864	36.875
DATA	987	12	52	0	0	A_43_P17428	NM_001012189	11186.4	265.133	3.716102e+002	3.729318e+001	433	35	9.535108e+000	0	0	0	0	0	0	361.4	1	1	43.7019	36.5806
DATA	988	12	53	0	0	A_64_P146222	TC633165	11211.7	265.091	1.677122e+004	1.677125e+003	16277.5	35	1.082675e+001	0	0	0	0	0	0	16340.4	1	1	49.1849	36.4615
DATA	989	12	54	0	0	A_64_P054856	NM_001135894	11237.2	265.045	5.294682e+002	5.303903e+001	567.5	35	9.985951e+000	0	0	0	0	0	0	516.69	1	1	46.1809	36.9459
DATA	990	12	55	0	0	A_64_P154982	ENSRNOT00000018118	11262.8	265.101	1.386529e+004	1.386533e+003	13508	38	9.445415e+000	0	0	0	0	0	0	13548.6	1	1	46.5243	40.6111
DATA	991	12	56	0	0	A_42_P726363	NM_031536	11288	265	1.763537e+001	3.582859e+000	89	37	8.284718e+000	0	0	0	0	0	0	17.2501	1	1	54.9904	37.3548
DATA	992	12	57	0	0	A_64_P139685	A_64_P139685	11313.1	265.333	1.750981e+001	3.574637e+000	89	38.5	7.805170e+000	0	0	0	0	0	0	17.1403	1	1	45.835	38.5588
DATA	993	12	58	0	0	A_64_P114104	NM_001034136	11338.9	265.104	7.586807e+003	7.586871e+002	7357	41	9.534984e+000	0	0	0	0	0	0	7429.98	1	1	46.8651	43.027
DATA	994	12	59	0	0	A_42_P480273	A_42_P480273	11364.2	264.986	7.217449e+003	7.217516e+002	7130.5	39	8.595948e+000	0	0	0	0	0	0	7069.22	1	1	46.8651	37.9032
DATA	995	12	60	0	0	A_64_P004344	ENSRNOT00000047696	11389.7	265.016	1.704784e+004	1.704787e+003	16775	42	9.700682e+000	0	0	0	0	0	0	16695	1	1	44.0646	42.3548
DATA	996	12	61	0	0	A_42_P723584	NM_001109099	11415.2	265.136	3.256546e+003	3.256695e+002	3276.5	41	1.004560e+001	0	0	0	0	0	0	3187.62	1	1	46.1809	41.3929
DATA	997	12	62	0	0	A_64_P114813	A_64_P114813	11440.4	265.227	1.004125e+001	3.276746e+000	85	34	8.960201e+000	0	0	0	0	0	0	9.8209	1	0	45.835	36.6579
DATA	998	12	63	0	0	A_64_P034551	NM_053818	11465.9	265.042	1.232897e+002	1.271829e+001	198	38	9.762828e+000	0	0	0	0	0	0	120.445	1	1	46.8651	37.7931
DATA	999	12	64	0	0	A_42_P492976	NM_001126099	11491.3	265.371	2.898885e+002	2.915704e+001	360	40	1.798512e+001	0	0	0	0	0	0	282.789	1	1	47.8731	42.8148
DATA	1000	12	65	0	0	A_64_P141799	NM_001025709	11516.6	265.594	1.124875e+003	1.125311e+002	1093	30	1.074305e+001	0	0	0	0	0	0	1095.37	1	1	47.5395	31.4815
DATA	1001	12	66	0	0	A_44_P337088	NM_133609	11542.1	265.286	4.453796e+002	4.464849e+001	475.5	28	8.808110e+000	0	0	0	0	1	0	432.75	1	1	46.8651	28.871
DATA	1002	12	67	0	0	A_64_P137961	A_64_P137961	11567.4	265.427	8.265209e+001	8.844239e+000	145	37	1.317708e+001	0	0	0	0	0	0	80.1084	1	1	57.5363	36.5926
DATA	1003	12	68	0	0	A_64_P053822	ENSRNOT00000028268	11592.6	265.427	8.382737e+001	8.957313e+000	148.5	41	9.983432e+000	0	0	0	0	0	0	81.0177	1	1	57.5363	40.0857
DATA	1004	12	69	0	0	A_42_P484456	NM_001106601	11617.9	265.333	3.764136e+003	3.764269e+002	3730.5	42	9.215812e+000	0	0	0	0	0	0	3626.29	1	1	45.1352	39.7419
DATA	1005	12	70	0	0	A_44_P508632	NM_001107594	11643.5	265.352	1.198624e+002	1.240040e+001	193	33	8.544671e+000	0	0	0	0	0	0	115.058	1	1	57.5363	32.6296
DATA	1006	12	71	0	0	A_64_P080598	NM_001047865	11668.4	265.609	4.384131e+001	5.422039e+000	116	40	1.246225e+001	0	0	0	0	0	0	41.9225	1	1	47.5395	40.3333
DATA	1007	12	72	0	0	A_64_P144243	A_64_P144243	11694.3	265.318	3.049217e+001	4.423368e+000	103	37	1.233681e+001	0	0	0	0	0	0	29.0288	1	1	45.835	40.5
DATA	1008	12	73	0	0	A_44_P479917	NM_030864	11719.6	265.427	2.416997e+001	4.025677e+000	99	33	8.524853e+000	0	0	0	0	0	0	22.9035	1	1	57.5363	35.8387
DATA	1009	12	74	0	0	A_44_P974524	NM_001025764	11745	265.455	3.551092e+001	4.804140e+000	110	35.5	9.578532e+000	0	0	0	0	0	0	33.4805	1	1	55.8519	36.9
DATA	1010	12	75	0	0	A_42_P522899	NM_021578	11770.2	265.536	1.180057e+002	1.224075e+001	187	39.5	1.187400e+001	0	0	0	0	0	0	110.663	1	1	47.2035	41.0882
DATA	1011	12	76	0	0	A_64_P069892	NM_019201	11795.6	265.382	2.745250e+004	2.745252e+003	25702	40	9.869144e+000	0	0	0	0	0	0	25594.8	1	1	46.8651	38.8
DATA	1012	12	77	0	0	A_44_P415199	NM_001108748	11821.3	265.5	2.528467e+001	4.151418e+000	98.5	34	1.015451e+001	0	0	0	0	0	0	23.4268	1	1	57.5363	36.7742
DATA	1013	12	78	0	0	A_64_P034610	NM_022622	11846.3	265.486	1.452694e+002	1.490012e+001	206.5	37.5	9.261549e+000	0	0	0	0	0	0	133.731	1	1	47.8731	37.7353
DATA	1014	12	79	0	0	A_42_P473828	ENSRNOT00000035309	11871.9	265.623	3.091656e+003	3.091836e+002	2875	40.5	7.253808e+000	0	0	0	0	0	0	2826.34	1	1	46.8651	39.6071
DATA	1015	12	80	66	1	DarkCorner	DarkCorner	11896.9	264.984	3.373440e+000	3.361477e+000	64.5	39	8.825837e+000	0	0	0	0	0	0	-10.3889	0	0	45.835	39.3667
DATA	1016	12	81	66	1	DarkCorner	DarkCorner	11922.7	265.5	3.399565e+000	3.387509e+000	71.5	37.5	9.603879e+000	0	0	0	0	0	0	-3.83466	0	0	65	39.2
DATA	1017	12	82	66	1	DarkCorner	DarkCorner	11947.6	265.833	3.426435e+000	3.414284e+000	67	43	1.188330e+001	0	0	0	0	0	0	-6.67636	0	0	47.8731	41.7097
DATA	1018	12	83	66	1	DarkCorner	DarkCorner	11973.3	265.565	3.455916e+000	3.443661e+000	67	35	6.752104e+000	0	0	0	0	0	0	-8.52436	0	0	46.8651	34.8182
DATA	1019	12	84	66	1	DarkCorner	DarkCorner	11998.9	265.5	3.486777e+000	3.474412e+000	66.5	33	1.046089e+001	0	0	0	0	0	0	-6.76767	0	0	56.9804	37.2593
DATA	1020	12	85	66	1	DarkCorner	DarkCorner	12024.4	265.573	3.519077e+000	3.506714e+000	72.5	33	9.081359e+000	0	0	0	0	0	0	0.248329	0	0	57.5363	33.1618
DATA	1021	13	1	66	1	DarkCorner	DarkCorner	9878.5	271	3.554558e+000	3.541953e+000	66	31	8.089181e+000	0	0	0	0	0	0	-3.2352	0	0	54.1152	31.2386
DATA	1022	13	2	66	1	DarkCorner	DarkCorner	9904.39	271.069	3.572918e+000	3.560248e+000	58.5	36	1.006963e+001	0	0	0	0	0	0	-9.03846	0	0	65	35.7647
DATA	1023	13	3	66	1	DarkCorner	DarkCorner	9929.5	271.352	3.588446e+000	3.575721e+000	61.5	39	1.025922e+001	0	0	0	0	0	0	-6.75782	0	0	57.5363	39.4194
DATA	1024	13	4	66	1	DarkCorner	DarkCorner	9954.68	271.544	3.601803e+000	3.589030e+000	59	33.5	1.051554e+001	0	0	0	0	0	0	-6.93196	0	0	46.8651	36.0625
DATA	1025	13	5	66	1	DarkCorner	DarkCorner	9980.4	271.317	3.613218e+000	3.600405e+000	61	33.5	9.677607e+000	0	0	0	0	0	0	-6.12494	0	0	51.0895	35.2143
DATA	1026	13	6	0	0	A_64_P029912	NM_001109143	10005.6	271.427	1.576244e+002	1.617043e+001	202	35	7.747874e+000	0	0	0	0	0	0	133.221	1	1	57.5363	36.3793
DATA	1027	13	7	0	0	A_42_P574731	NM_012948	10031.1	271.392	3.741409e+003	3.741583e+002	3028.5	34	9.408425e+000	0	0	0	0	0	0	3155.89	1	1	48.8603	33.9615
DATA	1028	13	8	0	0	A_44_P137448	NM_017043	10056.4	271.466	4.739616e+002	4.753434e+001	455.5	34	9.407390e+000	0	0	0	0	0	0	399.214	1	1	49.1849	34.2188
DATA	1029	13	9	0	0	A_42_P770614	NM_001013235	10081.6	271.427	4.529538e+004	4.529540e+003	37479.5	36	7.381543e+000	0	0	0	0	0	0	38116.8	1	1	57.5363	35.5556
DATA	1030	13	10	0	0	A_42_P785419	NM_199501	10107.3	271.378	2.271499e+002	2.300270e+001	256	33	6.985124e+000	0	0	0	0	0	0	191.065	1	1	48.5334	32.3667
DATA	1031	13	11	0	0	A_42_P581043	TC622715	10132.7	271.338	8.705331e+003	8.705406e+002	7174	34.5	8.459623e+000	0	0	0	1	0	0	7322.57	1	1	48.5334	34.5
DATA	1032	13	12	0	0	A_64_P098532	NM_001029928	10158	271.455	2.613430e+001	4.468901e+000	89.5	36.5	1.020795e+001	0	0	0	0	0	0	21.9932	1	1	55.8519	36.9333
DATA	1033	13	13	0	0	A_64_P090758	A_64_P090758	10183.3	271.635	1.029278e+003	1.029915e+002	937	34	6.318906e+000	0	0	0	0	0	0	866.94	1	1	48.5334	33
DATA	1034	13	14	0	0	A_43_P12079	NM_021583	10208.6	271.427	6.915909e+001	7.804810e+000	129	37	6.106095e+000	0	0	0	0	0	0	58.3245	1	1	65	36.6071
DATA	1035	13	15	0	0	A_64_P001947	A_64_P001947	10234.4	271.427	2.579363e+001	4.437901e+000	90	35	1.074524e+001	0	0	0	0	0	0	21.7889	1	1	57.5363	36.0909
DATA	1036	13	16	0	0	A_64_P064461	A_64_P064461	10259.6	271.427	5.019534e+001	6.179523e+000	110	40	1.107293e+001	0	0	0	0	0	0	42.4853	1	1	57.5363	40.9259
DATA	1037	13	17	0	0	A_42_P575398	NM_020538	10284.7	271.694	3.608875e+000	3.608082e+000	74	36	6.238778e+000	0	0	0	0	0	0	2.49474	0	0	48.2044	36.1212
DATA	1038	13	18	0	0	A_42_P482623	NM_199463	10310.2	271.493	1.968854e+003	1.969180e+002	1731	36	7.040101e+000	0	0	0	0	0	0	1674.59	1	1	47.2035	36.2857
DATA	1039	13	19	0	0	A_42_P738431	NM_019175	10335.8	271.392	3.307582e+003	3.307776e+002	2901	33	9.419609e+000	0	0	0	0	0	0	2821.42	1	1	49.1849	34.9355
DATA	1040	13	20	0	0	A_44_P1027780	ENSRNOT00000065815	10361.3	271.5	3.658755e+001	5.108424e+000	102.5	40.5	1.274340e+001	0	0	0	0	0	0	31.3085	1	1	65	42.8438
DATA	1041	13	21	0	0	A_42_P479802	NM_053679	10386.6	271.761	1.822209e+003	1.822555e+002	1628	35.5	8.355447e+000	0	0	0	0	0	0	1564.54	1	1	46.5243	36.4643
DATA	1042	13	22	0	0	A_44_P496624	NM_022302	10412.1	272.015	6.958488e+001	7.807295e+000	129	36	9.496816e+000	0	0	0	0	0	0	59.9618	1	1	46.8651	37.9375
DATA	1043	13	23	0	0	A_42_P700753	FQ212883	10437.3	271.9	2.348480e+003	2.348745e+002	2109.5	34	8.333897e+000	0	0	0	0	0	0	2031.31	1	1	47.2035	33.4231
DATA	1044	13	24	0	0	A_44_P229299	NM_001100678	10462.6	272	5.621366e+002	5.632333e+001	550	37	8.715312e+000	0	0	0	0	0	0	488.145	1	1	48.5334	35.96
DATA	1045	13	25	0	0	A_42_P728472	NM_001007600	10488.2	271.606	8.439258e+003	8.439331e+002	7185	33	1.267050e+001	0	0	0	0	0	0	7358.88	1	1	47.5395	36.2174
DATA	1046	13	26	0	0	A_42_P488904	NM_001108947	10513.5	271.63	1.091154e+004	1.091159e+003	9324	33.5	8.110536e+000	0	0	0	0	0	0	9555.02	1	1	48.5334	35.0417
DATA	1047	13	27	0	0	A_42_P458494	NM_001034951	10538.6	271.939	1.110329e+002	1.163249e+001	165	33	1.030556e+001	0	0	0	0	0	0	97.6511	1	1	45.4864	34.2727
DATA	1048	13	28	0	0	A_64_P100331	ENSRNOT00000048614	10564.2	272.164	3.104708e+001	4.643597e+000	95	36	8.056983e+000	0	0	0	0	0	0	27.4288	1	1	46.1809	35.9231
DATA	1049	13	29	0	0	A_64_P113989	NM_181631	10589.9	271.914	1.218851e+004	1.218856e+003	10749.5	38	8.493594e+000	0	0	0	0	0	0	10817.8	1	1	46.8651	37.4324
DATA	1050	13	30	0	0	A_64_P042105	ENSRNOT00000061599	10615.1	272.1	5.917211e+001	6.835187e+000	124	37	9.931594e+000	0	0	0	0	0	0	52.7592	1	1	46.8651	37.6452
DATA	1051	13	31	0	0	A_64_P044435	NM_001015020	10640.6	272	5.672916e+002	5.683129e+001	571	35.5	9.269651e+000	0	0	0	0	0	0	508.186	1	1	48.5334	36.7333
DATA	1052	13	32	0	0	A_64_P149011	NM_031352	10665.8	272.323	4.437591e+003	4.437721e+002	3971	32	8.231115e+000	0	0	0	0	0	0	3993.86	1	1	45.4864	32.8857
DATA	1053	13	33	0	0	A_42_P580844	NM_019296	10691.3	272.029	3.396442e+002	3.413156e+001	382	35	7.888388e+000	0	0	0	0	0	0	307.126	1	1	46.1809	32.68
DATA	1054	13	34	0	0	A_64_P052972	A_64_P052972	10716.6	271.573	1.974164e+002	2.002519e+001	254	39.5	1.325913e+001	0	0	0	0	0	0	179.35	1	1	57.5363	41.7308
DATA	1055	13	35	0	0	A_44_P454300	NM_001003979	10742.1	271.614	5.522821e+000	3.387518e+000	74	39	9.386913e+000	0	0	0	0	0	0	5.04106	1	0	57.259	39.125
DATA	1056	13	36	0	0	A_44_P149743	ENSRNOT00000005476	10767.2	272.324	1.717505e+001	3.743949e+000	85	34	9.249355e+000	0	0	0	0	0	0	15.7496	1	1	46.8651	35.6333
DATA	1057	13	37	0	0	A_42_P841017	NM_173309	10792.9	272.328	7.036157e+003	7.036235e+002	6486.5	33	7.102007e+000	0	0	0	0	0	0	6482.24	1	1	45.1352	33.5294
DATA	1058	13	38	0	0	A_44_P206844	NM_013074	10818.4	271.573	1.385697e+002	1.424366e+001	198.5	34	7.220362e+000	0	0	0	0	0	0	128.24	1	1	57.5363	34.7568
DATA	1059	13	39	0	0	A_64_P073400	NM_001000705	10842.9	272.136	9.697552e+001	1.023794e+001	163	37.5	5.649229e+000	0	0	0	0	0	0	90.1344	1	1	46.1809	37.5
DATA	1060	13	40	0	0	A_64_P066676	A_64_P066676	10868.8	272.155	2.101697e+001	3.885167e+000	90.5	37	6.556541e+000	0	0	0	0	0	0	19.6214	1	1	46.8651	37.2
DATA	1061	13	41	0	0	A_44_P386965	NM_001134594	10894.1	271.974	1.464666e+001	3.568325e+000	84.5	33	9.055148e+000	0	0	0	0	0	0	13.7319	1	0	47.8731	35.0645
DATA	1062	13	42	0	0	A_64_P095895	NM_019338	10919.8	272	2.690443e+002	2.709886e+001	323.5	33	9.026618e+000	0	0	0	0	0	0	253.295	1	1	46.8651	34.0625
DATA	1063	13	43	1028	1	(+)E1A_r60_a22	E1A_r60_a22	10944.9	272	1.443763e+002	1.479400e+001	209.5	37	7.899752e+000	0	0	0	0	0	0	136.463	1	1	46.8651	36.0357
DATA	1064	13	44	0	0	A_42_P541625	NM_001126090	10970.7	271.986	2.656447e+004	2.656449e+003	24541	37	1.062499e+001	0	0	0	0	0	0	25206.5	1	1	47.2035	37.9032
DATA	1065	13	45	0	0	A_64_P033895	NM_001126084	10996	272.044	2.019105e+002	2.044356e+001	262	37.5	8.890098e+000	0	0	0	0	0	0	192.294	1	1	46.8651	37.9231
DATA	1066	13	46	0	0	A_64_P012546	NM_022300	11021.5	272	8.087305e+004	8.087305e+003	76408	39	9.096229e+000	0	0	0	0	0	0	77292.4	1	1	54.1152	38.7931
DATA	1067	13	47	0	0	A_42_P495598	NM_001014026	11046.7	272.507	8.870031e+000	3.302735e+000	79	38	7.838529e+000	0	0	0	0	0	0	8.50551	1	0	47.5395	38.9063
DATA	1068	13	48	0	0	A_42_P483463	NM_001130999	11071.9	272.12	4.892355e+003	4.892458e+002	4702	37	1.000167e+001	0	0	0	0	0	0	4705.79	1	1	50.1463	38.3333
DATA	1069	13	49	0	0	A_42_P575104	NM_153737	11097.5	272.352	2.533416e+004	2.533418e+003	23844.5	38.5	1.067991e+001	0	0	0	0	0	0	24440.2	1	1	57.5363	38.0625
DATA	1070	13	50	0	0	A_42_P461726	NM_133549	11123.4	272.321	3.020390e+001	4.366651e+000	101	37	1.008660e+001	0	0	0	0	0	0	29.2184	1	1	50.1463	36.5357
DATA	1071	13	51	0	0	A_64_P098688	A_64_P098688	11148.4	272.427	7.689254e+004	7.689255e+003	82008.5	40	9.147453e+000	0	0	0	0	0	0	74565	1	1	57.5363	38.3043
DATA	1072	13	52	0	0	A_64_P105797	A_64_P105797	11173.2	272.444	4.653061e+001	5.612875e+000	112	37	8.226324e+000	0	0	0	0	0	0	45.2209	1	1	44.0646	36.6207
DATA	1073	13	53	0	0	A_42_P545943	NM_019291	11199	272.5	9.403576e+003	9.403629e+002	8988	36.5	9.977488e+000	0	0	0	0	0	0	9157.36	1	1	48.5334	37.0714
DATA	1074	13	54	0	0	A_44_P520045	NM_001001371	11224.3	272.465	1.134275e+002	1.176596e+001	182	34	8.718232e+000	0	0	0	0	0	0	110.648	1	1	47.8731	35.4848
DATA	1075	13	55	0	0	A_44_P306964	NM_001012184	11249.6	272.427	4.622026e+001	5.578049e+000	118	35.5	1.097871e+001	0	0	0	0	0	0	45.1533	1	1	57.5363	38.7941
DATA	1076	13	56	0	0	A_44_P156043	NM_001039012	11275.3	272.507	1.857330e+003	1.857592e+002	1919	37	7.517690e+000	0	0	0	0	0	0	1816.65	1	1	46.8651	37.8519
DATA	1077	13	57	0	0	A_64_P054686	TC585752	11300.6	272.427	2.514763e+004	2.514765e+003	24517	37	7.491067e+000	0	0	0	0	0	0	24618.8	1	1	57.5363	35.4333
DATA	1078	13	58	0	0	A_42_P575104	NM_153737	11325.9	272.402	2.549689e+004	2.549691e+003	24149	40	8.789657e+000	0	0	0	0	0	0	24976	1	1	51.0895	40.4839
DATA	1079	13	59	0	0	A_64_P142194	NM_053426	11351.4	272.5	1.637950e+003	1.638246e+002	1698	39	7.372730e+000	0	0	0	0	0	0	1605	1	1	47.8731	39
DATA	1080	13	60	0	0	A_64_P043314	A_64_P043314	11376.6	272.208	7.752977e+001	8.354718e+000	149	40.5	9.221266e+000	0	0	0	0	0	0	75.9696	1	1	47.5395	40.0714
DATA	1081	13	61	0	0	A_44_P684315	NM_001109104	11402.4	272.427	3.957628e+004	3.957630e+003	38559	42	1.066865e+001	0	0	0	0	0	0	38768.4	1	1	57.5363	43.0345
DATA	1082	13	62	0	0	A_64_P142620	NM_201417	11427.2	272.507	4.546786e+001	5.512110e+000	117.5	40	9.150628e+000	0	0	0	0	0	0	44.5129	1	1	47.8731	40.3448
DATA	1083	13	63	0	0	A_42_P568419	NM_001011894	11452.8	272.581	2.464594e+003	2.464792e+002	2474	37	9.814955e+000	0	0	0	0	0	0	2410.54	1	1	52.3208	38
DATA	1084	13	64	0	0	A_42_P519868	NM_053906	11478.5	272.5	8.661823e+001	9.207663e+000	156.5	40	1.752051e+001	0	0	0	0	0	0	84.6084	1	1	57.5363	46.8261
DATA	1085	13	65	0	0	A_43_P12346	NM_022943	11503.7	272.5	2.026299e+002	2.050302e+001	246	38	1.630252e+001	0	0	0	0	0	0	197.611	1	1	57.5363	41.1852
DATA	1087	13	67	0	0	A_44_P556989	NM_012610	11554.5	272.5	8.799432e+001	9.343397e+000	152	33	1.443369e+001	0	0	0	1	0	0	85.4495	1	1	57.5363	34.8235
DATA	1088	13	68	0	0	A_64_P113079	XM_218149	11579.9	272.5	1.107895e+001	3.339019e+000	83	37	1.306549e+001	0	0	0	0	0	0	10.73	1	0	56.9804	39.75
DATA	1089	13	69	0	0	A_64_P003937	NM_173111	11605.3	272.765	4.971395e+003	4.971495e+002	4823	40	9.233440e+000	0	0	0	0	0	0	4800.48	1	1	46.1809	39.2222
DATA	1090	13	70	0	0	A_42_P771337	NM_001012015	11630.6	272.573	1.338947e+002	1.375960e+001	201	29	9.300133e+000	0	0	0	0	0	0	128.856	1	1	57.5363	31.3226
DATA	1091	13	71	0	0	A_44_P401035	A_44_P401035	11656.3	272.5	1.567170e+002	1.599148e+001	213	31	8.445906e+000	0	0	0	0	0	0	150.248	1	1	57.5363	32.5556
DATA	1092	13	72	0	0	A_42_P536292	NM_033359	11681.4	273	1.087147e+003	1.087616e+002	1107	42	1.159603e+001	0	0	0	0	0	0	1038.12	1	1	48.5334	41.9697
DATA	1093	13	73	0	0	A_44_P128564	NM_001109121	11706.9	272.5	1.684628e+002	1.714923e+001	241	35	1.057445e+001	0	0	0	0	0	0	160.138	1	1	56.9804	36.6176
DATA	1094	13	74	0	0	A_64_P069957	NM_173315	11732.4	272.573	2.745202e+001	4.235063e+000	101.5	34.5	7.660053e+000	0	0	0	0	0	0	25.9692	1	1	57.5363	36.0313
DATA	1095	13	75	0	0	A_44_P538691	NM_031772	11757.6	272.693	1.516728e+002	1.550979e+001	218	38	1.282270e+001	0	0	0	0	0	0	142.743	1	1	48.5334	40.963
DATA	1096	13	76	0	0	A_44_P499231	NM_001034148	11783.1	272.523	4.022778e+002	4.035963e+001	451	41	1.043740e+001	0	0	0	0	0	0	376.476	1	1	55.8519	40.4615
DATA	1097	13	77	0	0	A_64_P121489	XM_001065883	11808.5	273.403	1.402280e+001	3.566118e+000	87	37	8.743538e+000	0	0	0	0	0	0	13.0469	1	0	45.835	36.871
DATA	1098	13	78	0	0	A_42_P507072	FQ213070	11833.6	273	4.858806e+003	4.858918e+002	4568	36	1.037309e+001	0	0	0	0	0	0	4492.21	1	1	48.5334	38.6207
DATA	1099	13	79	0	0	A_64_P120075	ENSRNOT00000027841	11859.4	272.573	2.900410e+002	2.919376e+001	343	40	9.003892e+000	0	0	0	0	0	0	266.323	1	1	57.5363	38.8485
DATA	1100	13	80	0	0	A_44_P1007362	NM_138864	11884.4	273.262	2.921159e+002	2.940251e+001	339.5	39.5	8.718391e+000	0	0	0	0	0	0	266.391	1	1	45.835	38.7
DATA	1101	13	81	66	1	DarkCorner	DarkCorner	11909.8	273.071	3.382296e+000	3.370302e+000	68	40	9.543091e+000	0	0	0	0	0	0	-6.02628	0	0	46.8651	38.6
DATA	1102	13	82	66	1	DarkCorner	DarkCorner	11935.5	272.648	3.409447e+000	3.397357e+000	65	43	1.043321e+001	0	0	0	0	0	0	-8.42993	0	0	57.5363	43.5
DATA	1103	13	83	66	1	DarkCorner	DarkCorner	11960.6	272.573	3.437225e+000	3.425036e+000	67.5	38	9.814183e+000	0	0	0	0	0	0	-6.88803	0	0	57.5363	37.5455
DATA	1104	13	84	66	1	DarkCorner	DarkCorner	11986.4	272.573	3.467349e+000	3.455054e+000	69	35	8.231039e+000	0	0	0	0	0	0	-4.89405	0	0	57.5363	36.25
DATA	1105	13	85	66	1	DarkCorner	DarkCorner	12011.5	273	5.650255e+000	3.530963e+000	78	34	1.033667e+001	0	0	0	0	0	0	4.94539	1	0	54.1152	34.3056
DATA	1106	14	1	66	1	DarkCorner	DarkCorner	9891.5	278.5	3.564804e+000	3.552163e+000	59	36	8.733806e+000	0	0	0	0	0	0	-6.78655	0	0	57.5363	35.6383
DATA	1107	14	2	66	1	DarkCorner	DarkCorner	9916.67	278.5	3.581392e+000	3.568692e+000	61	38	1.071577e+001	0	0	0	0	0	0	-7.20105	0	0	57.5363	38.5278
DATA	1108	14	3	66	1	DarkCorner	DarkCorner	9942.33	278.5	3.596012e+000	3.583260e+000	56	35	9.857966e+000	0	0	0	0	0	0	-10.9863	0	0	65	37.7778
DATA	1109	14	4	66	1	DarkCorner	DarkCorner	9967.24	278.671	3.608057e+000	3.595262e+000	59	34	1.094605e+001	0	0	0	0	0	0	-7.71691	0	0	47.2035	36.6667
DATA	1110	14	5	66	1	DarkCorner	DarkCorner	9992.89	278.5	3.618299e+000	3.605468e+000	60	34.5	6.963369e+000	0	0	0	0	0	0	-9.02762	0	0	56.9804	35.1667
DATA	1111	14	6	0	0	A_64_P151415	NM_001191684	10018.6	278.753	2.570464e+002	2.595740e+001	284	34	8.901685e+000	0	0	0	0	0	0	217.002	1	1	49.5074	33.36
DATA	1112	14	7	0	0	A_42_P475623	NM_053394	10043.6	278.763	6.765139e+002	6.774815e+001	632	34	9.740542e+000	0	0	0	0	0	0	570.176	1	1	49.1849	33.8667
DATA	1113	14	8	0	0	A_44_P123636	ENSRNOT00000023689	10069.3	278.5	3.636742e+000	3.633945e+000	72	33	6.353870e+000	0	0	0	0	0	0	2.27918	0	0	57.5363	33.1471
DATA	1114	14	9	0	0	A_64_P135207	ENSRNOT00000043866	10094.2	278.8	1.980626e+002	2.013547e+001	235.5	35	6.876503e+000	0	0	0	0	0	0	166.627	1	1	45.4864	34.9375
DATA	1115	14	10	0	0	A_42_P516693	NM_001107330	10119.9	278.5	8.050728e+000	3.715172e+000	74	32.5	6.787412e+000	0	0	0	0	0	0	6.77163	1	0	65	31
DATA	1116	14	11	0	0	A_64_P125447	NM_001109231	10145.3	278.845	1.882665e+002	1.917264e+001	224.5	36.5	1.052223e+001	0	0	0	0	0	0	158.396	1	1	47.5395	37.75
DATA	1117	14	12	0	0	A_42_P701756	NM_001107646	10170.8	278.761	3.973850e+003	3.974015e+002	3286	32	8.907650e+000	0	0	0	0	0	0	3345.68	1	1	46.8651	33.7097
DATA	1118	14	13	0	0	A_44_P344181	NM_017204	10196	279.226	8.094904e+002	8.102992e+001	723	36	8.768914e+000	0	0	0	0	0	0	682.27	1	1	45.4864	36.4231
DATA	1119	14	14	0	0	A_64_P035330	ENSRNOT00000066415	10221.2	279.339	4.251857e+002	4.267190e+001	438	35.5	9.069590e+000	0	0	0	0	0	0	358.886	1	1	44.7812	36.8667
DATA	1120	14	15	0	0	A_42_P837533	NM_001134546	10246.7	279.051	6.526386e+003	6.526485e+002	5466	36	1.064777e+001	0	0	0	0	0	0	5518.77	1	1	49.1849	38
DATA	1121	14	16	0	0	A_42_P744291	NM_001025729	10272.2	279.323	2.103612e+003	2.103920e+002	1833	33	1.023789e+001	0	0	0	0	0	0	1782.69	1	1	45.4864	36.7576
DATA	1122	14	17	0	0	A_44_P149267	NM_001013099	10297.8	279.167	2.620660e+001	4.445477e+000	90	37	7.422865e+000	0	0	0	0	0	0	22.264	1	1	46.1809	36.1471
DATA	1123	14	18	0	0	A_64_P002546	NM_144741	10323.1	278.614	1.477808e+001	3.874034e+000	84	33	7.436922e+000	0	0	0	0	0	0	12.5891	1	0	57.259	34.4324
DATA	1124	14	19	0	0	A_42_P808236	NM_001107189	10348.2	279.239	5.214165e+001	6.319409e+000	116	36	1.023180e+001	0	0	0	0	0	0	44.552	1	1	46.8651	36.7586
DATA	1125	14	20	0	0	A_44_P425848	NM_001108747	10373.6	278.596	6.219914e+002	6.230086e+001	601	35	8.660026e+000	0	0	0	0	0	0	533.188	1	1	57.8122	37.2174
DATA	1126	14	21	0	0	A_43_P17405	TC612613	10399.2	279.359	2.404562e+002	2.430571e+001	279	34	8.980411e+000	0	0	0	0	0	0	206.857	1	1	44.7812	36.8276
DATA	1127	14	22	0	0	A_64_P022402	NM_001142304	10424.5	278.648	1.931312e+001	4.026591e+000	87.5	34	6.973291e+000	0	0	0	0	0	0	16.6755	1	1	57.5363	33.3704
DATA	1128	14	23	0	0	A_44_P1019726	ENSRNOT00000025138	10450.1	278.614	2.446881e+002	2.472062e+001	279	35	9.570840e+000	0	0	0	0	0	0	212.099	1	1	57.259	34.6207
DATA	1129	14	24	0	0	A_44_P128186	NM_053305	10475.5	278.648	1.483436e+002	1.524285e+001	199	35.5	9.712180e+000	0	0	0	0	0	0	129.109	1	1	57.5363	35.5333
DATA	1130	14	25	0	0	A_44_P203665	NM_001105725	10500.7	278.863	1.308126e+002	1.353895e+001	182.5	34	1.140175e+001	0	0	0	0	0	0	114.327	1	1	48.2044	36.6
DATA	1131	14	26	0	0	A_42_P688802	DV723748	10526.2	279.103	3.385037e+003	3.385216e+002	3050	32	1.019200e+001	0	0	0	0	0	0	2971.31	1	1	46.5243	33.6552
DATA	1132	14	27	0	0	A_64_P129943	NM_001105712	10551.5	279.212	4.661590e+002	4.674414e+001	480	33.5	1.065657e+001	0	0	0	0	0	0	410.999	1	1	46.5243	34.7941
DATA	1133	14	28	0	0	A_64_P017577	NM_001106982	10577	279	3.263700e+001	4.745083e+000	97	38	7.416326e+000	0	0	0	0	0	0	28.9059	1	1	54.9904	37.5758
DATA	1134	14	29	0	0	A_44_P235926	NM_024138	10602.3	279.246	4.106514e+002	4.120802e+001	435	36	9.138223e+000	0	0	0	0	0	0	365.376	1	1	45.1352	34.7407
DATA	1135	14	30	0	0	A_42_P611638	NM_001034137	10627.8	279.194	1.433085e+003	1.433491e+002	1302	36	1.064514e+001	0	0	0	0	0	0	1281.05	1	1	47.5395	37.6296
DATA	1136	14	31	0	0	A_42_P654878	NM_001107919	10653.2	279.343	2.276104e+003	2.276358e+002	2064	32.5	7.580748e+000	0	0	0	0	0	0	2044.21	1	1	45.835	34.125
DATA	1137	14	32	0	0	A_64_P017464	NM_001135687	10678.2	279.303	1.016996e+001	3.530684e+000	78	35	9.188315e+000	0	0	0	0	0	0	9.17617	1	0	45.835	33.6176
DATA	1138	14	33	0	0	A_64_P152873	NM_001207022	10703.9	279.386	6.372728e+001	7.206543e+000	128	37.5	7.894709e+000	0	0	0	0	0	0	57.7757	1	1	57.259	37.1333
DATA	1139	14	34	0	0	A_64_P013243	A_64_P013243	10729.4	279.358	5.490896e+003	5.490998e+002	5094.5	38.5	1.277579e+001	0	0	0	0	0	0	5001.62	1	1	45.835	39.9643
DATA	1140	14	35	0	0	A_64_P029720	NM_001109405	10754.7	279.254	1.712153e+002	1.744303e+001	225	39.5	9.932464e+000	0	0	0	0	0	0	156.686	1	1	47.5395	40.5769
DATA	1141	14	36	0	0	A_43_P13459	NM_001107548	10779.9	279.243	2.557460e+002	2.578898e+001	309	34	7.870668e+000	0	0	0	0	0	0	235.12	1	1	46.5243	34.1471
DATA	1142	14	37	0	0	A_64_P053923	NM_001107323	10805.5	279.5	1.556396e+003	1.556747e+002	1490.5	33	8.384459e+000	0	0	0	0	0	0	1437.5	1	1	49.1849	35.2286
DATA	1143	14	38	0	0	A_44_P1005199	ENSRNOT00000032786	10830.9	279.386	1.729424e+001	3.715218e+000	86.5	36	5.910665e+000	0	0	0	0	0	0	16.0451	1	1	57.259	35.6897
DATA	1144	14	39	0	0	A_44_P104821	NM_024369	10856	279.77	1.202335e+002	1.246109e+001	181	36	6.642185e+000	0	0	0	0	0	0	112.037	1	1	45.1352	37.2162
DATA	1145	14	40	0	0	A_64_P009956	A_64_P009956	10881.2	279.75	3.368656e+002	3.384392e+001	391	39	1.046160e+001	0	0	0	0	0	0	315.25	1	1	45.1352	40.3871
DATA	1146	14	41	0	0	A_64_P060947	NM_203334	10907	279.455	3.123685e+001	4.504888e+000	103	32.5	8.878061e+000	0	0	0	0	0	0	29.3569	1	1	55.8519	33.7059
DATA	1147	14	42	0	0	A_64_P103419	NM_001106291	10932.3	279.403	6.397478e+000	3.295585e+000	77	34.5	9.418756e+000	0	0	0	0	0	0	6.03685	1	0	48.5334	34.75
DATA	1148	14	43	0	0	A_44_P220827	NM_001012051	10957.7	279.5	8.875180e+002	8.881020e+001	902	40	9.928723e+000	0	0	0	0	0	0	840.778	1	1	57.5363	39.2727
DATA	1149	14	44	0	1	ETG07_105829	ETG07_105829	10983.4	279.427	5.764673e+000	3.259359e+000	74	36.5	8.658159e+000	0	0	0	1	0	0	5.48197	1	0	57.5363	35.9375
DATA	1150	14	45	0	0	A_42_P719478	NM_001191779	11008.6	279.427	2.144336e+001	3.849169e+000	92	37	1.024341e+001	0	0	0	0	0	0	20.4647	1	1	57.5363	37.1667
DATA	1151	14	46	0	0	A_42_P462257	NM_001109481	11034	279.69	1.636810e+004	1.636813e+003	15290	40	8.816333e+000	0	0	0	0	0	0	15674.9	1	1	47.2035	40.4857
DATA	1152	14	47	0	0	A_44_P105634	NM_001007658	11059.7	279.754	2.391643e+002	2.412628e+001	299	40.5	9.810322e+000	0	0	0	0	0	0	229.784	1	1	46.8651	39.3636
DATA	1153	14	48	0	0	A_64_P100594	NM_001000360	11084.7	279.5	7.501450e+001	8.142098e+000	147	45.5	1.827689e+001	0	0	0	0	0	0	72.2871	1	1	57.5363	47.2692
DATA	1154	14	49	0	0	A_64_P004266	A_64_P004266	11110.3	279.5	1.832024e+001	3.649846e+000	88	36.5	8.083673e+000	0	0	0	0	0	0	17.7045	1	1	57.5363	36.4063
DATA	1155	14	50	0	0	A_44_P156343	NM_001000102	11135.5	279.5	1.234398e+001	3.381960e+000	82.5	36	9.705178e+000	0	0	0	0	0	0	11.9598	1	0	65	35.2381
DATA	1156	14	51	0	0	A_42_P504358	NM_001108674	11160.9	279.5	3.368324e+002	3.382939e+001	389	38	8.380931e+000	0	0	0	0	0	0	327.123	1	1	56.9804	38.64
DATA	1157	14	52	0	0	A_44_P281468	NM_001127556	11186.5	279.5	1.780889e+001	3.605081e+000	91	40	9.339522e+000	0	0	0	0	0	0	17.3326	1	1	57.5363	39.32
DATA	1158	14	53	0	0	A_43_P12785	NM_053364	11211.7	279.5	5.430665e+000	3.175475e+000	76.5	32	8.175479e+000	0	0	0	0	0	0	5.29521	1	0	57.5363	33.9615
DATA	1159	14	54	0	0	A_64_P053297	NM_001107278	11237.1	280.175	3.312280e+003	3.312427e+002	3314	34.5	1.148333e+001	0	0	0	0	0	0	3234.98	1	1	45.4864	37.4375
DATA	1160	14	55	0	0	A_64_P062986	NM_001001018	11262.3	279.836	1.246578e+001	3.359306e+000	85	36.5	8.779940e+000	0	0	0	0	0	0	12.1909	1	0	48.2044	38.9412
DATA	1161	14	56	0	0	A_44_P529226	NM_023091	11287.9	279.5	3.127268e+000	3.128892e+000	73	37	7.766708e+000	0	0	0	0	0	0	2.75853	0	0	65	35.7353
DATA	1162	14	57	0	0	A_42_P559737	NM_020074	11313.6	279.672	1.876459e+003	1.876718e+002	1939	38	6.807594e+000	0	0	0	0	0	0	1838.46	1	1	45.835	36.52
DATA	1163	14	58	0	0	A_44_P1017458	NM_199402	11338.6	279.573	1.081494e+002	1.125385e+001	177.5	40	1.190113e+001	0	0	0	0	0	0	106.008	1	1	57.5363	41.4667
DATA	1164	14	59	0	0	A_44_P407750	NM_001127680	11364.1	280.145	1.461596e+003	1.461927e+002	1523	41	9.292083e+000	0	0	0	0	0	0	1432.97	1	1	45.4864	39.0303
DATA	1165	14	60	0	0	A_64_P033872	NM_001037353	11389.6	279.573	2.909367e+001	4.260252e+000	99	36	7.399084e+000	0	0	0	0	0	0	28.519	1	1	65	36.1481
DATA	1166	14	61	0	0	A_42_P472699	NM_001108061	11414.9	279.523	4.391688e+001	5.383399e+000	115.5	44	1.182082e+001	0	0	0	0	0	0	43.03	1	1	55.8519	43.4167
DATA	1167	14	62	0	0	A_44_P201215	ENSRNOT00000014231	11440.4	279.573	1.754816e+001	3.576078e+000	90	37	1.040006e+001	0	0	0	0	0	0	17.1806	1	1	57.5363	38.8065
DATA	1168	14	63	0	0	A_64_P129910	NM_001107648	11465.6	279.573	3.506176e+002	3.520024e+001	418.5	39.5	1.552219e+001	0	0	0	0	0	0	342.901	1	1	57.5363	42.9706
DATA	1169	14	64	0	0	A_64_P027927	NM_022255	11491.1	279.614	2.289477e+002	2.310689e+001	280.5	54	2.829320e+001	0	0	0	0	1	0	223.589	1	1	57.259	58.1724
DATA	1170	14	65	0	0	A_64_P101623	A_64_P101623	11516.3	280.167	1.078835e+004	1.078840e+003	10292	37	2.139603e+001	0	0	0	0	0	0	10517.9	1	1	45.835	42.96
DATA	1171	14	66	0	0	A_42_P645110	NM_001029919	11541.9	280.273	1.616523e+004	1.616526e+003	14809.5	25	8.159441e+000	0	0	0	1	1	0	15726.6	1	1	45.835	26.8
DATA	1172	14	67	0	0	A_64_P017781	NM_001010956	11567.6	280.338	1.730552e+002	1.758871e+001	248	37	9.510378e+000	0	0	0	0	0	0	167.943	1	1	45.1352	36.7037
DATA	1173	14	68	0	0	A_64_P057106	NM_001004087	11592.8	280.266	1.593133e+002	1.624021e+001	227	35	1.005822e+001	0	0	0	0	0	0	154.175	1	1	45.1352	37.9333
DATA	1174	14	69	0	0	A_44_P187005	NM_022238	11618.1	279.614	1.525498e+002	1.557933e+001	219	34	9.410978e+000	0	0	0	0	0	0	147.157	1	1	57.259	34.069
DATA	1175	14	70	0	0	A_42_P779933	NM_017117	11643.5	280	1.224004e+002	1.264476e+001	178	30	7.168164e+000	0	0	0	1	1	0	117.662	1	1	54.1152	30.5152
DATA	1176	14	71	0	0	A_42_P555701	NM_001107554	11668.5	280	1.094948e+004	1.094953e+003	10563.5	35	7.344979e+000	0	0	0	0	0	0	10485.5	1	1	48.5334	32.8889
DATA	1177	14	72	0	0	A_42_P705302	NM_001107361	11694.2	280.101	7.533219e+003	7.533287e+002	7246.5	37	1.231223e+001	0	0	0	0	0	0	7183.08	1	1	46.5243	40.8182
DATA	1178	14	73	0	0	A_64_P015435	A_64_P015435	11719.5	280	2.956371e+004	2.956372e+003	30522.5	35	8.414417e+000	0	0	0	0	0	0	28060.1	1	1	54.1152	35.1875
DATA	1179	14	74	0	0	A_64_P036217	NM_001000569	11744.9	279.721	4.507027e+001	5.545072e+000	115	35	7.477476e+000	0	0	0	0	0	0	42.5644	1	1	45.835	36.1333
DATA	1180	14	75	0	0	A_44_P543511	NM_001024749	11770.1	280.093	1.507785e+003	1.508135e+002	1581	44	1.160657e+001	0	0	0	0	0	0	1416.47	1	1	46.8651	41.1538
DATA	1181	14	76	0	0	A_42_P759043	NM_001134509	11795.6	280.258	7.912118e+002	7.918856e+001	809.5	41	8.429595e+000	0	0	0	0	0	0	739.038	1	1	46.1809	40.5161
DATA	1182	14	77	0	0	A_42_P679982	NM_001107835	11820.9	280.104	4.475211e+003	4.475331e+002	4141	32	5.988969e+000	0	0	0	0	0	0	4154.74	1	1	46.8651	31.2917
DATA	1183	14	78	0	0	A_43_P18064	NM_001106904	11845.9	280.115	1.142601e+001	3.498791e+000	84	38.5	7.687902e+000	0	0	0	0	0	0	10.5404	1	0	45.1352	38.6316
DATA	1184	14	79	0	0	A_64_P092143	NM_001129879	11871.9	280.233	3.412947e+003	3.413109e+002	3236	40.5	7.947818e+000	0	0	0	0	0	0	3126.56	1	1	44.4243	38.7333
DATA	1185	14	80	0	0	A_64_P102886	A_64_P102886	11897.2	280.03	1.334717e+001	3.610046e+000	88	39	8.262195e+000	0	0	0	0	0	0	12.1391	1	0	46.1809	38.8286
DATA	1186	14	81	66	1	DarkCorner	DarkCorner	11922.6	280.427	3.391636e+000	3.379608e+000	70	42	1.102262e+001	0	0	0	0	0	0	-4.9792	0	0	57.5363	42.3235
DATA	1187	14	82	66	1	DarkCorner	DarkCorner	11948.2	280.727	3.418811e+000	3.406687e+000	74	41	9.717312e+000	0	0	0	0	0	0	-0.637708	0	0	41.0736	39.8846
DATA	1188	14	83	66	1	DarkCorner	DarkCorner	11973.5	280.352	3.447559e+000	3.435334e+000	71	37	1.023012e+001	0	0	0	0	0	0	-4.96016	0	0	57.5363	37.303
DATA	1189	14	84	66	1	DarkCorner	DarkCorner	11998.7	280.08	3.477583e+000	3.465250e+000	74	35	9.976450e+000	0	0	0	0	0	0	-0.908444	0	0	49.1849	36.6207
DATA	1190	14	85	66	1	DarkCorner	DarkCorner	12024.4	279.971	3.509763e+000	3.498212e+000	75	31	8.029605e+000	0	0	0	0	0	0	0.69034	0	0	46.1809	31.5989
DATA	1191	15	1	66	1	DarkCorner	DarkCorner	9878.51	286	3.556051e+000	3.543441e+000	64	31	8.036184e+000	0	0	0	0	0	0	-3.61921	0	0	49.8279	31.4879
DATA	1192	15	2	66	1	DarkCorner	DarkCorner	9903.65	285.893	3.573689e+000	3.561016e+000	61	37	1.019268e+001	0	0	0	0	0	0	-7.15095	0	0	51.4001	38.1429
DATA	1193	15	3	66	1	DarkCorner	DarkCorner	9929.5	285.648	5.602251e+001	6.646669e+000	113	38	8.174874e+000	0	0	0	1	0	0	47.7826	1	1	57.5363	38.5
DATA	1194	15	4	66	1	DarkCorner	DarkCorner	9954.65	286.25	3.602629e+000	3.589853e+000	59	35	1.097467e+001	0	0	0	0	0	0	-8.39046	0	0	43.7019	37.12
DATA	1195	15	5	66	1	DarkCorner	DarkCorner	9980.42	285.573	3.613861e+000	3.601046e+000	56.5	33	1.031529e+001	0	0	0	0	0	0	-10.5347	0	0	65	36.303
DATA	1196	15	6	0	0	A_44_P451392	NM_001108023	10005.5	286.265	3.323072e+002	3.342622e+001	353	34	9.949874e+000	0	0	0	0	0	0	280.824	1	1	46.5243	37
DATA	1197	15	7	0	0	A_64_P012661	ENSRNOT00000010298	10030.7	286.367	1.432629e+003	1.433086e+002	1258	32	8.139264e+000	0	0	0	0	0	0	1208.36	1	1	49.5074	31.0476
DATA	1198	15	8	0	0	A_42_P546058	NM_053670	10056.4	286.29	2.763193e+003	2.763431e+002	2346	35	8.666840e+000	0	0	0	0	0	0	2327.33	1	1	46.8651	35.3243
DATA	1199	15	9	0	0	A_42_P695401	NM_031530	10081.8	286.082	6.294975e+001	7.264208e+000	122	36	7.247718e+000	0	0	0	0	0	0	52.9732	1	1	44.7812	35
DATA	1200	15	10	0	0	A_44_P192193	A_44_P192193	10107.5	286	1.009697e+002	1.072853e+001	153	34	7.830753e+000	0	0	0	0	0	0	84.9334	1	1	54.1152	32.7
DATA	1201	15	11	0	0	A_42_P473886	NM_001165922	10132.8	285.892	3.910193e+002	3.926973e+001	391	34	5.233591e+000	0	0	0	0	0	0	328.937	1	1	45.835	33.7619
DATA	1202	15	12	0	0	A_42_P576953	NM_138882	10157.8	286.014	4.868599e+002	4.882073e+001	480	33	1.161553e+001	0	0	0	0	0	0	409.762	1	1	46.8651	34.4286
DATA	1203	15	13	0	0	A_44_P260227	ENSRNOT00000036745	10183.5	286	5.555024e+001	6.631160e+000	115	30	8.367778e+000	0	0	0	0	0	0	46.7963	1	1	54.1152	31.6552
DATA	1204	15	14	0	0	A_44_P276435	NM_053853	10208.6	286.118	2.268219e+002	2.296873e+001	258	38	9.994663e+000	0	0	0	0	0	0	191.323	1	1	47.2035	37.5652
DATA	1205	15	15	0	0	A_43_P19066	NM_001017494	10234.5	286	1.478283e+002	1.521736e+001	197	35	8.864053e+000	0	0	0	0	0	0	124.904	1	1	54.1152	35.6667
DATA	1206	15	16	0	0	A_64_P113200	ENSRNOT00000061930	10259.4	286.394	3.225065e+001	4.835882e+000	95.5	37.5	9.877468e+000	0	0	0	0	0	0	27.3033	1	1	45.1352	37.7667
DATA	1207	15	17	0	0	A_42_P480108	NM_001007637	10284.8	286.107	1.267192e+003	1.267702e+002	1122	36.5	5.033223e+000	0	0	0	0	0	0	1075.3	1	1	50.1463	35
DATA	1209	15	19	0	0	A_44_P420046	NM_021669	10335.4	286.072	7.041204e+001	7.896948e+000	129	34.5	7.475938e+000	0	0	0	0	0	0	60.0786	1	1	46.5243	35.2
DATA	1210	15	20	0	0	A_64_P077021	A_64_P077021	10361.4	286.185	2.503911e+001	4.355466e+000	88	37	9.390545e+000	0	0	0	0	0	0	21.4339	1	1	45.4864	37.4815
DATA	1211	15	21	0	0	A_44_P292558	NM_213559	10386.5	286.352	3.058342e+002	3.078898e+001	325	37	9.298492e+000	0	0	0	0	0	0	262.68	1	1	57.5363	38.125
DATA	1212	15	22	0	0	A_42_P471653	NM_001031654	10411.7	286.573	2.781328e+001	4.501252e+000	91	34	8.348033e+000	0	0	0	0	0	0	23.9744	1	1	49.1849	35.7586
DATA	1213	15	23	0	0	A_43_P12000	NM_019272	10437.2	286.356	5.373924e+002	5.385476e+001	529	34	6.606372e+000	0	0	0	0	0	0	464.996	1	1	48.5334	34.0313
DATA	1214	15	24	0	0	A_64_P131395	NM_001037523	10462.2	286.813	1.959083e+001	4.021286e+000	86	36.5	8.034409e+000	0	0	0	0	0	0	17.0183	1	1	48.8603	35
DATA	1215	15	25	0	0	A_42_P682853	NM_017193	10488	286.118	6.497676e+002	6.507080e+001	624	39	9.485080e+000	0	0	0	0	0	0	566.809	1	1	46.8651	40.0313
DATA	1216	15	26	0	0	A_42_P647505	TC640289	10513.5	286.254	3.879616e+003	3.879772e+002	3556	37	1.083218e+001	0	0	0	0	0	0	3398.84	1	1	47.5395	39.5185
DATA	1217	15	27	0	0	A_44_P682959	NM_001025139	10538.5	286.547	1.231022e+001	3.679221e+000	79.5	36	1.158680e+001	0	0	0	0	0	0	10.8314	1	0	49.1849	35.4375
DATA	1218	15	28	0	0	A_64_P249426	NM_001014271	10564.4	286.427	2.690519e+001	4.376136e+000	93	39.5	1.022129e+001	0	0	0	0	0	0	23.7817	1	1	57.5363	38.0938
DATA	1219	15	29	0	0	A_64_P133430	NM_001044282	10589.8	286.644	2.569285e+004	2.569288e+003	22163.5	38	9.154971e+000	0	0	0	0	0	0	22814	1	1	48.5334	37.9643
DATA	1220	15	30	0	0	A_42_P635611	NM_001025685	10615.1	286.5	3.431948e+000	3.419778e+000	69	35	1.020036e+001	0	0	0	0	0	0	-2.03449	0	0	56.9804	36.7742
DATA	1221	15	31	0	0	A_42_P592013	NM_001127600	10640.8	286.529	2.051152e+003	2.051434e+002	1807.5	36.5	7.240591e+000	0	0	0	0	0	0	1838.42	1	1	47.2035	37.1154
DATA	1222	15	32	0	1	ETG02_36680	ETG02_36680	10665.2	287.154	3.400273e+000	3.393837e+000	70	34	9.444842e+000	0	0	0	0	0	0	1.75805	0	0	45.835	33.9714
DATA	1223	15	33	0	0	A_42_P608478	NM_001025131	10691.4	286.427	1.171843e+001	3.569655e+000	81	37	1.148201e+001	0	0	0	0	0	0	10.6022	1	0	57.5363	37.3548
DATA	1224	15	34	0	0	A_44_P137397	NM_017236	10716.5	286.5	1.021033e+005	1.021033e+004	94066	36.5	1.070282e+001	0	0	0	0	0	0	92809.1	1	1	57.5363	36.5714
DATA	1226	15	36	0	0	A_64_P110789	A_64_P110789	10767.5	286.5	1.166451e+001	3.523472e+000	81	37.5	9.426617e+000	0	0	0	0	0	0	10.7027	1	0	57.5363	38.75
DATA	1227	15	37	0	0	A_64_P061562	A_64_P061562	10792.9	286.608	1.153723e+003	1.154198e+002	1117	32	8.008282e+000	0	0	0	0	0	0	1063.5	1	1	49.1849	33.4848
DATA	1228	15	38	0	0	A_44_P511359	NM_001108736	10818.1	286.87	4.486692e+002	4.498772e+001	479	35	7.089200e+000	0	0	0	0	0	0	415.451	1	1	46.8651	35.5
DATA	1229	15	39	0	0	A_42_P658220	NM_001109598	10843.6	286.897	2.531987e+003	2.532199e+002	2367	37.5	7.247845e+000	0	0	0	0	0	0	2355.04	1	1	46.5243	36.2813
DATA	1230	15	40	0	0	A_42_P479096	NM_001008293	10868.8	286.789	1.001203e+003	1.001736e+002	977	39	7.426343e+000	0	0	0	1	0	0	935.278	1	1	47.5395	39.2333
DATA	1231	15	41	0	0	A_64_P275280	NM_001109569	10894.6	286.608	8.574021e+003	8.574083e+002	7938	36	1.280625e+001	0	0	0	0	0	0	8044.06	1	1	49.1849	39
DATA	1232	15	42	0	0	A_42_P785926	NM_001108289	10919.9	286.757	9.868032e+002	9.873344e+001	989	34	8.307385e+000	0	0	0	0	0	0	929.637	1	1	46.5243	34.2333
DATA	1233	15	43	0	0	A_64_P005238	A_64_P005238	10945.3	286.5	4.411078e+001	5.464461e+000	113	40	1.089372e+001	0	0	0	0	0	0	41.7219	1	1	57.5363	38.8387
DATA	1234	15	44	0	0	A_42_P555753	NM_001106401	10970.7	286.662	4.220963e+003	4.221085e+002	4009	38.5	7.053297e+000	0	0	0	0	0	0	4007.78	1	1	48.5334	39.8438
DATA	1235	15	45	0	0	A_42_P469751	XM_001054007	10996.3	286.863	2.173541e+003	2.173777e+002	2130	36	8.637421e+000	0	0	0	0	0	0	2071.47	1	1	48.2044	35.5714
DATA	1236	15	46	0	0	A_44_P506124	XM_222590	11021.6	287.095	3.800383e+003	3.800517e+002	3682	38.5	8.820671e+000	0	0	0	0	0	0	3634.67	1	1	44.0646	37.7857
DATA	1237	15	47	0	0	A_44_P441947	XM_001079870	11047	286.939	9.546137e+002	9.551430e+001	1010	38	7.769303e+000	0	0	0	0	0	0	916.033	1	1	46.8651	40.1724
DATA	1238	15	48	0	0	A_64_P127659	NM_001106228	11072.3	287.164	5.765964e+003	5.766051e+002	5632	45	7.952645e+000	0	0	0	0	0	0	5550.35	1	1	45.835	41.875
DATA	1239	15	49	0	0	A_42_P733076	NM_001033867	11097.7	286.943	3.138999e+002	3.154864e+001	373.5	40	9.821421e+000	0	0	0	0	0	0	303.045	1	1	46.8651	40.6429
DATA	1240	15	50	0	0	A_64_P145939	NM_001109499	11122.8	287.132	6.364780e+001	7.102245e+000	134	36	9.494188e+000	0	0	0	0	0	0	61.6127	1	1	46.1809	35.2963
DATA	1241	15	51	0	0	A_44_P1040796	NM_001106660	11148.5	286.742	1.530611e+004	1.530614e+003	14627	37.5	8.054052e+000	0	0	0	0	0	0	14853.8	1	1	46.5243	35.7917
DATA	1242	15	52	0	0	A_42_P588072	NM_001106829	11173.4	286.761	5.811638e+001	6.604047e+000	130.5	41	7.190699e+000	0	0	0	0	0	0	56.5238	1	1	47.5395	41.1154
DATA	1243	15	53	0	0	A_64_P045823	ENSRNOT00000023172	11199.1	286.614	2.021653e+002	2.045744e+001	268	35	1.081039e+001	0	0	0	0	0	0	197.024	1	1	65	38.3103
DATA	1244	15	54	0	0	A_42_P591344	NM_001037780	11224.7	287.083	3.337998e+002	3.352591e+001	393	37.5	9.375129e+000	0	0	0	0	0	0	325.892	1	1	48.5334	36.4706
DATA	1245	15	55	0	0	A_64_P120322	A_64_P120322	11249.4	287	1.285155e+001	3.374476e+000	83	35	1.017539e+001	0	0	0	0	0	0	12.5652	1	0	44.0646	38
DATA	1246	15	56	0	0	A_64_P062665	NM_001170470	11275.4	287.028	5.763653e+002	5.772071e+001	631	35	6.613727e+000	0	0	0	0	0	0	564.227	1	1	48.2044	36.7931
DATA	1247	15	57	0	0	A_44_P398300	NM_001005538	11301.2	286.97	2.371386e+003	2.371590e+002	2338	37	9.293252e+000	0	0	0	0	0	0	2323.61	1	1	46.1809	37.3103
DATA	1248	15	58	0	0	A_64_P001545	ENSRNOT00000029141	11326	287	4.473837e+004	4.473838e+003	43966	41	1.031714e+001	0	0	0	0	0	0	43864.5	1	1	54.9904	42.88
DATA	1249	15	59	0	0	A_44_P1010653	NM_001109021	11351.4	286.972	5.164696e+003	5.164790e+002	5211	36.5	8.556617e+000	0	0	0	0	0	0	5065.55	1	1	48.2044	37.2353
DATA	1250	15	60	0	0	A_44_P398969	NM_001013225	11377	287	7.759441e+002	7.765672e+001	838	39	9.668150e+000	0	0	0	0	0	0	761.08	1	1	46.8651	39.1613
DATA	1251	15	61	0	0	A_64_P059495	NM_001109986	11402.3	286.972	3.591295e+003	3.591430e+002	3579	38	1.236165e+001	0	0	0	0	0	0	3521.53	1	1	47.2035	39.8966
DATA	1252	15	62	0	0	A_64_P037040	A_64_P037040	11427.6	287.157	2.215130e+002	2.236895e+001	284	37	8.850296e+000	0	0	0	0	0	0	217.086	1	1	47.5395	38.2857
DATA	1253	15	63	0	0	A_64_P051446	NM_001142942	11453.1	287.104	6.582304e+003	6.582378e+002	6527	38.5	1.035692e+001	0	0	0	0	0	0	6444.82	1	1	47.8731	41.8611
DATA	1254	15	64	0	0	A_42_P701756	NM_001107646	11478.4	287.406	3.962148e+003	3.962271e+002	3894.5	48	2.566015e+001	0	0	0	0	1	0	3874.68	1	1	47.5395	53.4545
DATA	1255	15	65	0	0	A_44_P172604	NM_031795	11504	287.061	2.449671e+003	2.449870e+002	2375	53	2.177212e+001	0	0	0	0	1	0	2391.73	1	1	46.8651	56.3929
DATA	1256	15	66	0	0	A_64_P152000	A_64_P152000	11528.9	287.111	2.136930e+002	2.159737e+001	264	26.5	1.043975e+001	0	0	0	0	1	0	208.247	1	1	46.8651	29.7353
DATA	1257	15	67	0	0	A_44_P339008	NM_001024975	11555	286.969	8.608033e+002	8.613750e+001	836	29	9.861144e+000	0	0	0	0	1	0	836.915	1	1	46.8651	29.6296
DATA	1258	15	68	0	0	A_44_P560070	A_44_P560070	11580	288.019	4.053729e+001	5.130977e+000	109.5	35	1.184574e+001	0	0	0	0	0	0	39.3149	1	1	39.4933	38.4688
DATA	1259	15	69	0	0	A_44_P520509	NM_001033868	11605.5	287.386	5.804303e+003	5.804389e+002	5697.5	32	8.371196e+000	0	0	0	0	0	0	5612.27	1	1	47.5395	32
DATA	1260	15	70	0	0	A_42_P643349	NM_001109495	11631.2	287.254	1.321057e+002	1.358458e+001	190.5	29.5	6.989788e+000	0	0	0	0	1	0	127.305	1	1	45.1352	30
DATA	1261	15	71	0	0	A_44_P215075	NM_012667	11656.4	287.427	3.123774e+002	3.139890e+001	364	29.5	6.352103e+000	0	0	0	1	1	0	299.932	1	1	57.5363	30.1429
DATA	1262	15	72	0	0	A_44_P560363	ENSRNOT00000049736	11681.2	287.667	1.413472e+003	1.413831e+002	1430	36	1.120760e+001	0	0	0	0	0	0	1351.85	1	1	49.1849	38.1
DATA	1263	15	73	0	0	A_44_P553158	NM_001014014	11706.9	287.5	1.533017e+003	1.533352e+002	1502	35	9.906668e+000	0	0	0	0	0	0	1459.66	1	1	56.9804	35.4722
DATA	1264	15	74	0	0	A_64_P165277	NM_001106370	11732.1	287.364	1.334541e+001	3.484887e+000	85	33	7.132125e+000	0	0	0	0	0	0	12.6466	1	0	49.8279	33.7353
DATA	1265	15	75	0	0	A_64_P138187	A_64_P138187	11757.4	287.476	8.861118e+002	8.867024e+001	912	33	7.200016e+000	0	0	0	0	0	0	835.442	1	1	44.4243	33.2333
DATA	1266	15	76	0	0	A_44_P429041	XM_227654	11783	287.288	1.778556e+002	1.808073e+001	248	38	1.067050e+001	0	0	0	0	0	0	166.757	1	1	43.7019	39.3333
DATA	1267	15	77	0	0	A_44_P465880	NM_199389	11808.3	287.488	3.821260e+003	3.821400e+002	3690	36	6.923473e+000	0	0	0	0	0	0	3561.99	1	1	51.7088	36.3704
DATA	1268	15	78	0	0	A_44_P381740	NM_001000239	11833.7	287.5	2.058628e+001	3.883703e+000	93	36	1.015955e+001	0	0	0	0	0	0	19.0701	1	1	57.5363	37.7037
DATA	1269	15	79	0	0	A_64_P045211	NM_001191733	11859.4	287.427	2.760227e+001	4.314026e+000	99.5	39	6.840855e+000	0	0	0	0	0	0	25.398	1	1	57.5363	38.6216
DATA	1270	15	80	0	0	A_64_P010896	A_64_P010896	11884.1	287.69	1.349886e+001	3.600503e+000	86	38	8.984216e+000	0	0	0	0	0	0	12.3373	1	0	47.5395	37.129
DATA	1271	15	81	0	0	A_42_P566906	NM_001006966	11910	287.657	3.873956e+003	3.874102e+002	3570	41	8.731652e+000	0	0	0	0	0	0	3514.11	1	1	45.4864	39.3784
DATA	1272	15	82	66	1	DarkCorner	DarkCorner	11935.5	287.5	3.401400e+000	3.389338e+000	68	38	8.558936e+000	0	0	0	0	0	0	-7.59574	0	0	57.5363	38.1538
DATA	1273	15	83	66	1	DarkCorner	DarkCorner	11960.7	287.829	3.428691e+000	3.416532e+000	67	36.5	9.814348e+000	0	0	0	0	0	0	-5.95967	0	0	47.2035	37.1071
DATA	1274	15	84	66	1	DarkCorner	DarkCorner	11986.3	287.5	3.458315e+000	3.446051e+000	69	31.5	8.947261e+000	0	0	0	0	0	0	-3.44532	0	0	57.5363	34.6471
DATA	1275	15	85	66	1	DarkCorner	DarkCorner	12011.5	287.5	3.488746e+000	3.476374e+000	72.5	36	1.028665e+001	0	0	0	0	0	0	-3.66297	0	0	57.5363	34.359
DATA	1276	16	1	66	1	DarkCorner	DarkCorner	9891.11	293.119	3.565725e+000	3.553081e+000	60	33	8.554030e+000	0	0	0	0	0	0	-7.5573	0	0	50.7771	34.1667
DATA	1277	16	2	66	1	DarkCorner	DarkCorner	9916.07	293.314	3.582032e+000	3.569329e+000	58	37	9.332215e+000	0	0	0	0	0	0	-10.0157	0	0	46.5243	37.9024
DATA	1278	16	3	66	1	DarkCorner	DarkCorner	9942.16	293.483	3.596725e+000	3.583971e+000	60	36	7.959221e+000	0	0	0	0	0	0	-8.472	0	0	52.6241	36.6429
DATA	1279	16	4	66	1	DarkCorner	DarkCorner	9967.5	293.352	3.608768e+000	3.595970e+000	64	33	9.347646e+000	0	0	0	0	0	0	-6.18055	0	0	57.5363	35.6129
DATA	1280	16	5	0	0	A_42_P708614	NM_001130505	9992.91	293.386	5.216545e+004	5.216546e+003	44016.5	35.5	1.095975e+001	0	0	0	0	0	0	44132.9	1	1	57.259	38.5667
DATA	1281	16	6	0	0	A_44_P427177	NM_053923	10018.5	293.352	1.319361e+001	3.847133e+000	79	36	7.928535e+000	0	0	0	0	0	0	11.1376	1	0	57.5363	34.9565
DATA	1282	16	7	0	0	A_44_P417051	NM_001024886	10043.6	293.427	4.570871e+001	5.830509e+000	105	32	8.950650e+000	0	0	0	0	0	0	38.5233	1	1	57.5363	32.875
DATA	1283	16	8	0	0	A_64_P052917	ENSRNOT00000029053	10068.8	293.781	3.711153e+001	5.186885e+000	98	35	7.617153e+000	0	0	0	0	0	0	31.2429	1	1	47.8731	34.0811
DATA	1284	16	9	0	0	A_42_P689013	NM_053800	10094.7	293.338	1.720503e+004	1.720507e+003	14222.5	36	6.372319e+000	0	0	0	0	0	0	14475.1	1	1	48.5334	33.8387
DATA	1285	16	10	0	0	A_42_P668072	NM_013130	10119.8	293.56	2.400653e+002	2.427890e+001	266	32	8.637005e+000	0	0	0	0	0	0	201.945	1	1	49.5074	32.2581
DATA	1286	16	11	0	0	A_44_P762596	XM_237156	10145.5	292.847	1.656661e+002	1.695866e+001	205.5	35	7.532596e+000	0	0	0	0	0	0	139.401	1	1	42.9674	34.64
DATA	1287	16	12	0	0	A_44_P673662	TC577636	10170.6	293.329	8.474955e+001	9.216818e+000	141	31	9.359277e+000	0	0	0	0	0	0	71.3646	1	1	47.8731	34.1034
DATA	1288	16	13	0	0	A_42_P674598	NM_013067	10196.1	293.5	3.951485e+004	3.951487e+003	32416.5	38	9.602944e+000	0	0	0	0	0	0	33311.6	1	1	56.9804	39.2963
DATA	1289	16	14	0	0	A_44_P529994	NM_001191720	10221.5	293.5	1.646692e+001	3.970853e+000	80	34	1.022178e+001	0	0	0	0	0	0	13.9027	1	0	57.5363	37.1212
DATA	1290	16	15	0	0	A_42_P655644	NM_133618	10247	293.729	1.135971e+003	1.136543e+002	1009	36	8.717581e+000	0	0	0	0	0	0	960.868	1	1	46.8651	36.9394
DATA	1291	16	16	0	0	A_42_P589674	NM_001044225	10272.2	293.775	8.213774e+003	8.213853e+002	6738	36.5	8.102156e+000	0	0	0	0	0	0	6962.75	1	1	47.2035	37.0833
DATA	1292	16	17	0	0	A_64_P010139	A_64_P010139	10297.5	293.5	2.440101e+002	2.466367e+001	281.5	37	8.928509e+000	0	0	0	0	0	0	207.358	1	1	49.1849	35.5806
DATA	1293	16	18	0	0	A_42_P586883	NM_001106416	10323.1	293.5	5.220693e+001	6.330152e+000	112	36.5	9.018632e+000	0	0	0	0	0	0	44.4896	1	1	56.9804	36.25
DATA	1294	16	19	0	0	A_42_P461144	DV724416	10348.4	293.521	1.674882e+003	1.675262e+002	1468	36	7.387589e+000	0	0	0	1	0	0	1431.64	1	1	48.2044	36.2
DATA	1295	16	20	0	0	A_64_P130565	NM_031668	10374	293.53	2.775279e+002	2.797982e+001	304.5	38	9.700000e+000	0	0	0	0	0	0	238.012	1	1	45.1352	38.44
DATA	1296	16	21	0	0	A_64_P002826	NM_001134527	10399	294.078	1.479757e+002	1.521623e+001	193	37	8.219696e+000	0	0	0	0	0	0	127.348	1	1	45.835	37.4583
DATA	1298	16	23	0	0	A_64_P036099	A_64_P036099	10449.9	293.696	3.152552e+003	3.152749e+002	2746.5	35	6.626762e+000	0	0	0	0	0	0	2733.84	1	1	49.8279	35.2258
DATA	1299	16	24	0	0	A_64_P080580	ENSRNOT00000040473	10475.4	294	9.320781e+002	9.327364e+001	894	37	1.055014e+001	0	0	0	0	0	0	811.594	1	1	45.4864	35.6552
DATA	1300	16	25	0	0	A_43_P12276	NM_022636	10500.6	293.689	7.423023e+001	8.202062e+000	132	39	9.471655e+000	0	0	0	0	0	0	64.9057	1	1	44.0646	39.5926
DATA	1301	16	26	0	0	A_42_P505393	NM_199085	10526.3	293.684	5.460226e+002	5.471264e+001	546.5	37	1.068469e+001	0	0	0	0	0	0	479.527	1	1	49.5074	36.3448
DATA	1302	16	27	0	0	A_44_P883619	ENSRNOT00000032374	10551.3	294.28	3.844835e+000	3.479745e+000	71.5	37	1.244109e+001	0	0	0	0	0	0	3.39149	1	0	48.2044	35.931
DATA	1303	16	28	0	0	A_44_P493894	ENSRNOT00000050156	10577	293.545	1.992947e+005	1.992947e+004	176831	37.5	8.344675e+000	0	0	0	0	0	0	176601	1	1	55.8519	35.6786
DATA	1304	16	29	0	0	A_64_P085334	TC585414	10602.5	293.944	1.071022e+004	1.071027e+003	9242.5	34.5	1.091055e+001	0	0	0	0	0	0	9534.82	1	1	48.5334	37
DATA	1306	16	31	0	0	A_64_P045433	A_64_P045433	10653	294.226	3.964357e+003	3.964502e+002	3685	37	9.876769e+000	0	0	0	0	0	0	3562.33	1	1	45.4864	38.9667
DATA	1307	16	32	0	0	A_64_P025351	AY724474	10678.5	293.648	4.064299e+004	4.064300e+003	36160	36	1.023517e+001	0	0	0	0	0	0	36693.9	1	1	57.5363	35.6111
DATA	1308	16	33	0	0	A_44_P501626	ENSRNOT00000050744	10704	293.545	1.698515e+001	3.767588e+000	83	34.5	1.101973e+001	0	0	0	0	0	0	15.4076	1	1	55.8519	36.2813
DATA	1309	16	34	0	0	A_64_P071525	NM_001000141	10729.4	293.573	3.359091e+000	3.358500e+000	70.5	38.5	9.697790e+000	0	0	0	0	0	0	2.51118	0	0	65	38.4333
DATA	1310	16	35	0	0	A_64_P006545	A_64_P006545	10754.6	294	1.758602e+004	1.758605e+003	16007	37	8.106170e+000	0	0	0	0	0	0	16103	1	1	48.5334	37.28
DATA	1311	16	36	0	0	A_64_P089561	NM_001044265	10780.2	293.886	7.049003e+001	7.790061e+000	133	34	1.047485e+001	0	0	0	0	0	0	64.8472	1	1	46.8651	35.5484
DATA	1312	16	37	0	0	A_44_P791108	NM_001014070	10805	293.939	3.756948e+001	5.001311e+000	102	36	7.289114e+000	0	0	0	0	0	0	34.7173	1	1	46.8651	37.7419
DATA	1313	16	38	0	0	A_44_P161535	A_44_P161535	10830.6	294.395	9.663793e+003	9.663849e+002	9262	32	7.457963e+000	0	0	0	0	0	0	8971.05	1	1	48.2044	33.3939
DATA	1314	16	39	0	0	A_44_P299136	NM_001108539	10856.3	294.3	3.407281e+002	3.422952e+001	385	39	7.405819e+000	0	0	0	0	0	0	317.719	1	1	47.2035	39.3333
DATA	1315	16	40	1028	1	(+)E1A_r60_a97	E1A_r60_a97	10881.5	294	3.567481e+000	3.277121e+000	74	38	7.937118e+000	0	0	0	0	0	0	3.3408	1	0	54.1152	39.0455
DATA	1316	16	41	0	0	A_44_P161723	NM_001134526	10906.7	294.015	1.879518e+002	1.907309e+001	246	35	9.125057e+000	0	0	0	0	0	0	176.745	1	1	45.835	37
DATA	1317	16	42	0	0	A_64_P121443	A_64_P121443	10932.5	294.094	5.807096e+000	3.282447e+000	75	35	9.149743e+000	0	0	0	0	0	0	5.48352	1	0	44.0646	34.697
DATA	1318	16	43	0	0	A_42_P771373	NM_012614	10957.9	293.896	1.836298e+004	1.836301e+003	16910.5	40	8.347443e+000	0	0	0	0	0	0	17408	1	1	46.8651	39.4138
DATA	1319	16	44	0	0	A_44_P1025944	NM_147140	10983.1	294	1.323127e+004	1.323131e+003	12596	36	7.987979e+000	0	0	0	0	0	0	12590.5	1	1	46.8651	35.4324
DATA	1320	16	45	0	0	A_64_P014085	NM_001007678	11008.6	294.043	1.191224e+003	1.191653e+002	1217	35.5	1.026638e+001	0	0	0	0	0	0	1137.65	1	1	46.8651	35.0385
DATA	1321	16	46	0	0	A_64_P095298	NM_001047963	11033.6	294.029	5.217306e+001	6.111884e+000	120	38	1.022880e+001	0	0	0	0	0	0	49.9955	1	1	46.1809	38.0357
DATA	1322	16	47	0	0	A_64_P122037	A_64_P122037	11059.5	294	2.578135e+004	2.578137e+003	24293.5	43	9.462637e+000	0	0	0	0	0	0	24787.2	1	1	54.1152	41.2174
DATA	1323	16	48	0	0	A_64_P098094	A_64_P098094	11084.6	294.069	9.008968e+004	9.008969e+003	86975	42	9.286945e+000	0	0	0	0	0	0	86877.3	1	1	53.8203	42.8929
DATA	1324	16	49	0	0	A_44_P353708	ENSRNOT00000033510	11110.2	294.333	4.674928e+001	5.639599e+000	120	39	1.039820e+001	0	0	0	0	0	0	45.212	1	1	46.8651	39.4516
DATA	1325	16	50	0	0	A_42_P541669	ENSRNOT00000043345	11135.7	293.866	8.679729e+002	8.685429e+001	904	37	8.913801e+000	0	0	0	0	0	0	841.615	1	1	45.835	36.0741
DATA	1326	16	51	0	0	A_42_P560894	NM_019138	11161.1	294.232	5.501790e+003	5.501879e+002	5431	35	6.363392e+000	0	0	0	0	0	0	5347.52	1	1	46.5243	34.8333
DATA	1327	16	52	0	0	A_42_P498066	NM_031136	11186.5	294.352	9.201180e+004	9.201181e+003	89970	45	9.674293e+000	0	0	0	0	0	0	89624.3	1	1	57.5363	43.1667
DATA	1328	16	53	0	0	A_42_P538928	NM_053021	11211.6	294.427	2.970852e+004	2.970854e+003	29049.5	35	1.055910e+001	0	0	0	0	0	0	28991.8	1	1	57.5363	36.8065
DATA	1329	16	54	0	0	A_64_P302169	NM_001099493	11237	294.086	3.309352e+001	4.548919e+000	104	38	9.988883e+000	0	0	0	0	0	0	32.3472	1	1	43.7019	38
DATA	1330	16	55	0	0	A_43_P18282	NM_001173436	11262.4	294.36	5.813950e+001	6.596667e+000	131	36	6.844425e+000	0	0	0	0	0	0	56.9069	1	1	48.8603	37
DATA	1331	16	56	0	0	A_44_P304169	NM_001000482	11287.4	294.269	1.826195e+002	1.852544e+001	259	37	1.077862e+001	0	0	0	0	0	0	178.939	1	1	46.5243	37.3514
DATA	1332	16	57	0	0	A_44_P318932	XM_231081	11313.1	293.969	6.294848e+003	6.294925e+002	6286	40	7.757974e+000	0	0	0	0	0	0	6172.87	1	1	46.8651	40.8846
DATA	1333	16	58	0	0	A_64_P124621	A_64_P124621	11338.2	293.828	9.136052e+001	9.650688e+000	165.5	37.5	9.378361e+000	0	0	0	0	0	0	89.6346	1	1	43.7019	38.4706
DATA	1334	16	59	0	0	A_42_P553960	NM_001107831	11364.2	294.239	9.708483e+003	9.708532e+002	9481	34	8.807922e+000	0	0	0	0	0	0	9527.4	1	1	46.8651	35.4
DATA	1335	16	60	0	0	A_64_P129459	A_64_P129459	11389.3	294.222	8.683527e+002	8.689091e+001	927	40	9.469422e+000	0	0	0	0	0	0	852.073	1	1	47.5395	40.7931
DATA	1336	16	61	0	0	A_64_P083224	ENSRNOT00000017383	11414.5	294.378	3.070498e+001	4.370480e+000	103	37	1.120795e+001	0	0	0	0	0	0	30.1174	1	1	48.5334	37.7586
DATA	1337	16	62	0	0	A_64_P031840	NM_001017445	11440.5	294.5	1.501199e+003	1.501522e+002	1494	36.5	8.712014e+000	0	0	0	0	0	0	1471.39	1	1	46.5243	37.8125
DATA	1338	16	63	0	0	A_43_P16427	NM_001191000	11465.9	294.595	5.320230e+001	6.165437e+000	127	37.5	1.090634e+001	0	0	0	0	0	0	52.0911	1	1	48.5334	40.5
DATA	1339	16	64	0	0	A_64_P159034	NM_001191681	11490.9	294.648	1.509194e+004	1.509197e+003	13129	55	2.502943e+001	0	1	0	0	1	0	14756.6	1	1	47.8731	61.5263
DATA	1340	16	65	0	0	A_64_P009007	A_64_P009007	11516.5	294.5	1.349903e+002	1.385612e+001	193	44.5	2.379114e+001	0	0	0	0	1	0	131.76	1	1	57.5363	51.4615
DATA	1341	16	66	0	0	A_42_P489817	NM_001107681	11542.2	294.392	9.190432e+002	9.195767e+001	1015	26	7.270292e+000	0	0	0	1	1	0	895.173	1	1	49.1849	25.7143
DATA	1342	16	67	0	0	A_42_P643272	NM_053389	11567.2	294.575	1.750839e+003	1.751120e+002	1707	30	9.252858e+000	0	0	0	1	1	0	1701.34	1	1	48.5334	30.6667
DATA	1343	16	68	0	0	A_64_P076063	XM_001061753	11592.5	294.5	1.603381e+002	1.633993e+001	214	30	6.251603e+000	0	0	0	0	0	0	155.378	1	1	57.5363	30.9444
DATA	1344	16	69	0	0	A_64_P047371	NM_001109423	11618	294.558	2.110213e+003	2.110449e+002	2022	31	8.589574e+000	0	0	0	0	0	0	2038.58	1	1	49.1849	32.6757
DATA	1345	16	70	0	0	A_44_P991940	XM_225667	11644.1	294.404	1.893029e+002	1.919374e+001	240	30	6.091322e+000	0	0	0	0	1	0	182.223	1	1	40.6843	30.1143
DATA	1346	16	71	0	0	A_42_P667802	ENSRNOT00000014585	11668.8	295.183	1.730163e+002	1.759158e+001	210.5	34	1.331884e+001	0	0	0	1	0	0	165.941	1	1	44.4243	36.5161
DATA	1347	16	72	0	0	A_44_P433942	A_44_P433942	11694.2	294.589	3.502750e+001	4.740544e+000	108	33	7.791020e+000	0	0	0	0	0	0	33.4524	1	1	48.2044	32.7
DATA	1348	16	73	0	0	A_42_P735279	NM_001004446	11719.7	294.493	2.388744e+004	2.388746e+003	23106	33	6.441054e+000	0	0	0	0	0	0	22709	1	1	46.8651	32.4444
DATA	1349	16	74	0	0	A_64_P000316	A_64_P000316	11744.7	294.746	6.930967e+001	7.644299e+000	139	35	7.391762e+000	0	0	0	0	0	0	65.5742	1	1	45.835	34.2941
DATA	1350	16	75	0	0	A_64_P073357	XM_001070426	11770.1	295.161	9.118395e+001	9.677377e+000	159	38	1.153992e+001	0	0	0	0	0	0	85.8188	1	1	45.1352	39.3243
DATA	1351	16	76	0	0	A_42_P501972	NM_001025418	11795.7	294.903	4.047240e+002	4.060348e+001	451	36.5	9.247050e+000	0	0	0	0	0	0	378.742	1	1	47.8731	38.7857
DATA	1352	16	77	0	0	A_64_P030824	ENSRNOT00000002002	11821	294.873	1.029667e+002	1.080635e+001	171	33.5	9.786815e+000	0	0	0	0	0	0	95.7788	1	1	46.8651	35.6786
DATA	1353	16	78	0	0	A_42_P537715	NM_001025743	11846.6	295	2.436512e+003	2.436735e+002	2290	38	8.012190e+000	0	0	0	0	0	0	2251.91	1	1	48.5334	37.8378
DATA	1354	16	79	0	0	A_44_P596424	TC642059	11871.9	294.663	4.682066e+002	4.693845e+001	506	41	7.144345e+000	0	0	0	0	0	0	429.812	1	1	52.3208	40.3333
DATA	1355	16	80	0	0	A_42_P528891	XM_001074805	11897.4	295.25	3.814420e+002	3.829074e+001	424	38.5	9.637743e+000	0	0	0	0	0	0	347.69	1	1	45.1352	38.2188
DATA	1356	16	81	0	0	A_64_P130516	A_64_P130516	11922.5	295.188	8.604920e+001	9.241899e+000	154.5	34	8.427322e+000	0	0	0	0	0	0	77.8568	1	1	44.4243	36.7391
DATA	1357	16	82	66	1	DarkCorner	DarkCorner	11947.3	294.662	3.410019e+000	3.397927e+000	71	36	9.088987e+000	0	0	0	0	0	0	-5.05231	0	0	46.1809	36.9259
DATA	1358	16	83	66	1	DarkCorner	DarkCorner	11973.3	294.632	3.438898e+000	3.426703e+000	66.5	35	8.796413e+000	0	0	0	0	0	0	-8.32921	0	0	49.5074	36.1081
DATA	1359	16	84	66	1	DarkCorner	DarkCorner	11998.9	294.886	3.468758e+000	3.456457e+000	68	36.5	9.835486e+000	0	0	0	0	0	0	-4.30869	0	0	46.8651	36.7667
DATA	1360	16	85	66	1	DarkCorner	DarkCorner	12024.5	295	3.500192e+000	3.502571e+000	75	32	8.760332e+000	0	0	0	0	0	0	2.81246	0	0	54.1152	32.6799
DATA	1361	17	1	66	1	DarkCorner	DarkCorner	9878.28	300.635	3.557040e+000	3.544426e+000	60	31	7.916781e+000	0	0	0	0	0	0	-5.39754	0	0	52.0157	30.8072
DATA	1362	17	2	66	1	DarkCorner	DarkCorner	9903.68	300.958	3.574677e+000	3.562001e+000	63	35	6.705048e+000	0	0	0	0	0	0	-7.14022	0	0	48.5334	34.9286
DATA	1363	17	3	66	1	DarkCorner	DarkCorner	9929.5	300.5	3.590214e+000	3.577482e+000	55	36	8.003661e+000	0	0	0	0	0	0	-12.5548	0	0	57.5363	36.1778
DATA	1364	17	4	66	1	DarkCorner	DarkCorner	9954.89	300.5	3.603274e+000	3.590496e+000	59	36	7.760065e+000	0	0	0	0	0	0	-8.11071	0	0	56.9804	35.8636
DATA	1365	17	5	0	0	A_44_P434817	NM_001012187	9980.18	300.667	3.360575e+003	3.360768e+002	2826	36	8.915373e+000	0	0	0	0	0	0	2846.72	1	1	47.5395	37.25
DATA	1366	17	6	0	0	A_64_P153319	A_64_P153319	10005.3	300.672	4.517409e+002	4.531810e+001	464	37.5	1.203825e+001	0	0	0	0	0	0	381.744	1	1	46.1809	40.3333
DATA	1367	17	7	0	0	A_64_P034394	XM_218828	10031.1	300.5	2.383892e+001	4.331901e+000	88.5	35	1.110786e+001	0	0	0	0	0	0	20.1065	1	1	56.9804	35.6667
DATA	1368	17	8	0	0	A_64_P001399	A_64_P001399	10056.4	301.101	1.783667e+004	1.783671e+003	14894	39.5	1.005874e+001	0	0	0	0	0	0	15023.8	1	1	47.2035	37.1667
DATA	1369	17	9	0	0	A_42_P712191	NM_001109207	10081.9	300.69	2.140345e+002	2.170823e+001	249	35	7.794943e+000	0	0	0	0	0	0	180.128	1	1	47.5395	33.2308
DATA	1370	17	10	0	0	A_44_P746633	NM_001109580	10107.3	300.557	1.384368e+004	1.384373e+003	11148.5	35	8.110384e+000	0	0	0	0	0	0	11646.4	1	1	47.5395	34.7241
DATA	1371	17	11	0	0	A_42_P772157	NM_017020	10132.5	300.5	1.130929e+003	1.131510e+002	995	37	9.197592e+000	0	0	0	0	0	0	951.52	1	1	49.1849	35.9355
DATA	1372	17	12	0	0	A_44_P407543	NM_001024996	10158.1	300.592	1.713694e+002	1.751592e+001	212	33	9.023982e+000	0	0	0	0	0	0	144.261	1	1	48.2044	32.9677
DATA	1374	17	14	0	0	A_64_P057225	NM_001008857	10208.6	300.573	2.910319e+002	2.932693e+001	314	34	9.217751e+000	0	0	0	0	0	0	245.547	1	1	57.5363	36.1786
DATA	1375	17	15	0	0	A_42_P462015	NM_001011943	10234.2	301.033	5.008994e+002	5.021983e+001	493.5	33	6.700987e+000	0	0	0	0	0	0	423.341	1	1	45.1352	33
DATA	1376	17	16	0	0	A_42_P596050	NM_053572	10259.8	300.957	8.004170e+002	8.012272e+001	718	37	1.000612e+001	0	0	0	0	0	0	677.871	1	1	46.8651	39.2593
DATA	1377	17	17	0	0	A_44_P213776	NM_052829	10284.7	300.764	1.186413e+002	1.239651e+001	167.5	35	6.565169e+000	0	0	0	0	0	0	100.709	1	1	47.5395	33.8333
DATA	1378	17	18	0	0	A_64_P004468	A_64_P004468	10310.1	301.194	5.178859e+003	5.178983e+002	4518	37	8.861782e+000	0	0	0	0	0	0	4407.8	1	1	45.1352	35.2581
DATA	1379	17	19	0	0	A_44_P290394	NM_053580	10335.6	301	4.053487e+003	4.053644e+002	3451	37	7.557399e+000	0	0	0	0	0	0	3460.11	1	1	48.5334	36.0571
DATA	1380	17	20	0	0	A_64_P076911	XM_215948	10361.4	300.573	7.531223e+001	8.331238e+000	136	36.5	6.579662e+000	0	0	0	0	0	0	64.4947	1	1	57.5363	36.4667
DATA	1381	17	21	0	0	A_64_P155895	NM_001009658	10386.6	301.265	3.025216e+003	3.025425e+002	2707	34	9.206519e+000	0	0	0	0	0	0	2599.55	1	1	46.5243	36.48
DATA	1382	17	22	0	0	A_43_P16338	ENSRNOT00000034555	10412	301.156	9.095975e+001	9.759588e+000	150	37	7.454208e+000	0	0	0	0	0	0	78.445	1	1	45.4864	38.5
DATA	1383	17	23	0	0	A_42_P716283	NM_001107983	10437.3	301.242	9.358193e+002	9.364826e+001	876.5	35.5	5.905482e+000	0	0	0	0	0	0	810.142	1	1	45.4864	35.5667
DATA	1384	17	24	0	0	A_43_P13355	NM_139082	10462.5	301.324	2.571762e+002	2.595603e+001	283	37	7.431217e+000	0	0	0	0	0	0	223.524	1	1	46.5243	36.5333
DATA	1385	17	25	0	0	A_64_P126065	NM_001005900	10488	300.882	1.194830e+002	1.244908e+001	175	37	1.081916e+001	0	0	0	0	0	0	104.28	1	1	46.8651	39.8519
DATA	1386	17	26	0	0	A_44_P838532	NM_001107144	10513.4	300.988	1.164096e+003	1.164616e+002	1106.5	39	8.985890e+000	0	0	0	0	0	0	1020.34	1	1	49.8279	38.0606
DATA	1387	17	27	0	0	A_42_P785861	NM_001009422	10539	301	3.409934e+003	3.410110e+002	3026	40	1.105547e+001	0	0	0	0	0	0	3002.14	1	1	46.8651	38.16
DATA	1388	17	28	0	0	A_42_P641962	NM_012999	10564.3	300.938	3.492166e+003	3.492336e+002	3098	39.5	1.152952e+001	0	0	0	0	0	0	3088.36	1	1	45.4864	39.3667
DATA	1389	17	29	0	0	A_64_P085201	TC633318	10589.5	301	1.223351e+002	1.270631e+001	177.5	33	9.919272e+000	0	0	0	0	0	0	108.682	1	1	54.1152	35.5667
DATA	1390	17	30	0	0	A_64_P015687	NM_053573	10615.1	301.2	6.536631e+003	6.536720e+002	5676.5	38	9.679328e+000	0	0	0	0	0	0	5834.37	1	1	46.8651	37.2424
DATA	1391	17	31	0	0	A_64_P078332	NM_012794	10640.6	301.028	3.218536e+003	3.218716e+002	2924	36	1.080438e+001	0	0	0	0	0	0	2886.28	1	1	48.2044	38.4048
DATA	1392	17	32	0	0	A_42_P637189	NM_031612	10666	301.203	5.411142e+003	5.411247e+002	4754	35.5	1.057214e+001	0	0	0	0	0	0	4875.55	1	1	46.8651	36.6875
DATA	1393	17	33	0	0	A_42_P602472	NM_001008290	10691.2	301.134	3.583181e+003	3.583339e+002	3266	36	1.066523e+001	0	0	0	0	0	0	3243.71	1	1	46.1809	36.3333
DATA	1394	17	34	0	0	A_64_P003749	NM_031799	10716.7	301.309	2.012515e+002	2.040272e+001	251	33	1.161252e+001	0	0	0	0	0	0	183.051	1	1	46.5243	34.6667
DATA	1395	17	35	0	0	A_42_P785861	NM_001009422	10742.1	301.169	3.347080e+003	3.347247e+002	3084	37.5	8.154330e+000	0	0	0	0	0	0	3058.74	1	1	46.8651	36.3
DATA	1396	17	36	0	0	A_64_P138889	NM_001013050	10767.5	301.362	4.769353e+003	4.769468e+002	4354	37.5	1.214882e+001	0	0	0	0	0	0	4378.91	1	1	47.5395	39.0769
DATA	1397	17	37	0	0	A_44_P409820	NM_012908	10792.8	301.279	5.337347e+001	6.279044e+000	119	35.5	8.196614e+000	0	0	0	0	0	0	49.2297	1	1	44.4243	34.9063
DATA	1398	17	38	0	0	A_44_P529880	ENSRNOT00000033370	10818.4	301.427	3.303994e+000	3.292277e+000	70	37	9.194654e+000	0	0	0	0	0	0	-0.192871	0	0	65	36.3333
DATA	1399	17	39	0	0	A_64_P084851	ENSRNOT00000029593	10843.4	301.368	1.154662e+002	1.200286e+001	180.5	36	7.269144e+000	0	0	0	0	0	0	107.463	1	1	49.5074	36.0741
DATA	1400	17	40	0	0	A_44_P654068	NM_001114402	10868.9	301.397	5.411789e+002	5.421620e+001	582.5	39	1.349359e+001	0	0	0	0	0	0	505.886	1	1	48.5334	40
DATA	1401	17	41	0	0	A_64_P094855	NM_001109591	10894.1	301.418	1.742718e+003	1.743021e+002	1720	40	9.847530e+000	0	0	0	0	0	0	1636	1	1	46.1809	39.5769
DATA	1402	17	42	0	0	A_42_P516658	NM_001024888	10919.6	301.427	3.836922e+002	3.850545e+001	429.5	34	8.787764e+000	0	0	0	0	0	0	361.696	1	1	57.5363	35.5313
DATA	1403	17	43	0	0	A_64_P092394	ENSRNOT00000064749	10945.4	301.427	1.756437e+001	3.670530e+000	87	37	9.213130e+000	0	0	0	0	0	0	16.6252	1	1	57.5363	37.1034
DATA	1404	17	44	0	0	A_44_P280755	NM_148890	10970.2	301.164	6.399620e+001	7.159964e+000	128	38	6.312473e+000	0	0	0	0	0	0	60.8021	1	1	41.0736	39.7742
DATA	1405	17	45	0	0	A_42_P629062	AF072835	10995.9	301.5	6.165534e+002	6.173827e+001	661	36	9.602280e+000	0	0	0	0	0	0	587.991	1	1	56.9804	36.4872
DATA	1406	17	46	0	0	A_64_P131141	ENSRNOT00000012638	11021.1	301.493	6.958212e+001	7.653617e+000	135.5	36	5.848477e+000	0	0	0	0	0	0	66.5916	1	1	47.8731	35.7368
DATA	1407	17	47	0	0	A_42_P756350	NM_021772	11046.6	301.427	8.453427e+001	9.030696e+000	149	40	8.370793e+000	0	0	0	0	0	0	81.1736	1	1	57.5363	39.3333
DATA	1408	17	48	66	-1	(-)3xSLv1	NegativeControl	11072.1	301.5	3.178151e+000	3.166881e+000	64	38.5	8.404227e+000	0	0	0	0	0	0	-5.00524	0	0	56.9804	39.3
DATA	1409	17	49	0	0	A_64_P124796	A_64_P124796	11097.5	301.5	2.883003e+001	4.275729e+000	98	41	7.486770e+000	0	0	0	0	0	0	27.854	1	1	65	41.1379
DATA	1410	17	50	0	0	A_44_P288443	NM_001108878	11122.7	301.639	5.232781e+002	5.242247e+001	568.5	41.5	1.127381e+001	0	0	0	0	0	0	506.942	1	1	51.0895	41.7333
DATA	1411	17	51	0	0	A_42_P748004	NM_001135873	11148.5	301.386	1.711188e+003	1.711476e+002	1730	36	7.978110e+000	0	0	0	0	0	0	1661.96	1	1	47.5395	35.3103
DATA	1412	17	52	0	0	A_64_P067310	NM_001139507	11173.6	301.36	1.333235e+003	1.333604e+002	1374	37.5	8.043727e+000	0	0	0	0	0	0	1297.79	1	1	48.8603	40.3077
DATA	1413	17	53	0	0	A_44_P210809	NM_001107334	11199.1	301.5	1.617453e+002	1.647414e+001	231	41.5	9.980373e+000	0	0	0	0	0	0	157.767	1	1	56.9804	40.2941
DATA	1414	17	54	1028	1	(+)E1A_r60_a104	E1A_r60_a104	11224.5	301.5	3.133150e+000	3.122039e+000	70	36	8.251947e+000	0	0	0	0	0	0	-0.495267	0	0	57.5363	36.8065
DATA	1415	17	55	0	0	A_44_P1042711	NM_001108426	11249.6	301.88	1.017820e+002	1.064488e+001	166.5	39	8.598516e+000	0	0	0	0	0	0	99.6058	1	1	48.8603	38.6296
DATA	1416	17	56	0	0	A_42_P661992	TC596141	11275.1	301.768	3.034357e+002	3.050289e+001	370	36	8.713385e+000	0	0	0	0	0	0	297.314	1	1	46.5243	37
DATA	1417	17	57	0	0	A_42_P565621	NM_001105971	11300.6	301.594	1.665429e+002	1.694227e+001	234	39.5	1.060660e+001	0	0	0	0	0	0	163.338	1	1	47.5395	40.625
DATA	1418	17	58	0	0	A_44_P264600	NM_001013132	11325.9	301.629	1.666335e+002	1.695080e+001	237	41	7.448422e+000	0	0	0	0	0	0	163.537	1	1	46.8651	40.8571
DATA	1419	17	59	0	0	A_64_P034901	TC591400	11351.4	301.573	1.258788e+001	3.352562e+000	84	36	8.577512e+000	0	0	0	0	0	0	12.3585	1	0	57.5363	36.375
DATA	1420	17	60	0	0	A_42_P468216	NM_001030026	11376.9	301.908	3.284740e+003	3.284887e+002	3316	39.5	8.958461e+000	0	0	0	0	0	0	3225.19	1	1	46.1809	38.0625
DATA	1421	17	61	0	0	A_64_P062855	XM_343708	11401.9	302.029	3.609430e+001	4.762940e+000	109	39	1.222321e+001	0	0	0	0	0	0	35.4321	1	1	46.8651	39.2
DATA	1422	17	62	0	0	A_64_P048421	AABR03055399	11427.5	301.744	3.120529e+000	3.111452e+000	73	37	1.022487e+001	0	0	0	0	0	0	1.09149	0	0	50.4627	37.2973
DATA	1423	17	63	0	0	A_44_P342166	NM_013187	11453	301.545	1.785135e+002	1.812062e+001	243	38	7.278032e+000	0	0	0	0	0	0	174.981	1	1	55.8519	38.9714
DATA	1424	17	64	0	0	A_42_P748154	XM_001059949	11478.2	302.169	4.294367e+003	4.294480e+002	4311	42.5	1.364951e+001	0	0	0	0	0	0	4204.59	1	1	45.835	45.6333
DATA	1425	17	65	0	0	A_64_P157763	A_64_P157763	11503.8	301.845	1.245527e+003	1.245918e+002	1257	52	1.490802e+001	0	0	0	0	1	0	1217.57	1	1	47.2035	55.4063
DATA	1426	17	66	0	0	A_64_P155645	NM_022706	11529.2	301.882	6.576515e+003	6.576589e+002	6271.5	28.5	1.142603e+001	0	0	0	0	0	0	6416.95	1	1	46.5243	31.4643
DATA	1427	17	67	0	0	A_42_P622436	NM_022298	11554.5	301.795	9.643766e+003	9.643817e+002	8905	26	4.597333e+000	0	1	0	1	1	0	9388.95	1	1	48.5334	25.7241
DATA	1428	17	68	0	0	A_44_P304190	NM_001014044	11579.9	301.614	1.244965e+002	1.283989e+001	179	30	5.709052e+000	0	0	0	0	1	0	120.896	1	1	57.259	29.3714
DATA	1429	17	69	1028	1	(+)E1A_r60_a104	E1A_r60_a104	11606.4	300.614	4.027425e+001	5.052284e+000	111	31	6.634572e+000	0	0	0	1	1	0	38.9869	1	1	41.4593	30.6667
DATA	1430	17	70	0	0	A_42_P771373	NM_012614	11630.8	302.273	1.360328e+004	1.360332e+003	13475.5	31	1.417427e+001	0	0	0	1	0	0	13129.4	1	1	45.4864	36.3824
DATA	1431	17	71	0	0	A_64_P101976	A_64_P101976	11656.1	301.935	2.104421e+002	2.128197e+001	256	31	5.955872e+000	0	0	0	0	1	0	202.373	1	1	54.4085	30.1
DATA	1432	17	72	0	0	A_42_P777935	ENSRNOT00000027369	11681.5	302	2.418237e+002	2.439120e+001	299.5	33.5	1.021103e+001	0	0	0	0	0	0	231.63	1	1	65	36.1563
DATA	1433	17	73	0	0	A_64_P041521	NM_012945	11706.9	301.935	9.969491e+001	1.047010e+001	172	31	8.680424e+000	0	0	0	0	0	0	95.0783	1	1	54.4085	32.7241
DATA	1434	17	74	0	0	A_44_P102661	NM_138862	11732.1	302.1	1.583008e+003	1.583334e+002	1556	32.5	6.250425e+000	0	0	0	0	0	0	1502.7	1	1	46.8651	32.9667
DATA	1435	17	75	0	0	A_42_P714166	NM_001017491	11757.5	302	8.661669e+000	3.344135e+000	83	38	1.099002e+001	0	0	0	0	0	0	8.18069	1	0	54.1152	37.2258
DATA	1436	17	76	0	0	A_64_P098703	NM_198728	11783	302	9.133424e+002	9.139196e+001	962	33	8.657895e+000	0	0	0	0	0	0	857.935	1	1	46.8651	32.6774
DATA	1437	17	77	0	0	A_44_P624151	NM_001107932	11808.3	302	7.329656e+002	7.336931e+001	752.5	33	8.054430e+000	0	0	0	0	0	0	684.543	1	1	49.1849	36.0769
DATA	1438	17	78	0	0	A_42_P674843	NM_001008880	11833.7	302.085	1.373985e+003	1.374378e+002	1347	35	9.960770e+000	0	0	0	0	0	0	1275.32	1	1	49.8279	36.5714
DATA	1439	17	79	0	0	A_44_P1039634	NM_001108924	11859.4	302.427	1.128756e+002	1.176239e+001	178	39	7.603055e+000	0	0	0	0	0	0	104.085	1	1	57.5363	39.1613
DATA	1440	17	80	0	0	A_42_P517253	NM_001012275	11884.5	302.352	4.247357e+002	4.260398e+001	455	39.5	1.001020e+001	0	0	0	0	0	0	388.991	1	1	57.5363	39.0882
DATA	1441	17	81	0	0	A_42_P485589	NM_017246	11910.1	302.386	1.388769e+002	1.428731e+001	200	35	1.243444e+001	0	0	0	0	0	0	126.262	1	1	57.259	36.8462
DATA	1442	17	82	66	1	DarkCorner	DarkCorner	11935.5	302.352	3.393259e+000	3.381226e+000	69	34.5	9.164262e+000	0	0	0	0	0	0	-6.56216	0	0	57.5363	36.625
DATA	1443	17	83	66	1	DarkCorner	DarkCorner	11960.3	302.088	3.420025e+000	3.407897e+000	70	33.5	7.692503e+000	0	0	0	0	0	0	-4.69166	0	0	45.835	34.2857
DATA	1444	17	84	66	1	DarkCorner	DarkCorner	11986.2	302.232	3.449244e+000	3.437013e+000	66	35	8.258634e+000	0	0	0	0	0	0	-8.4946	0	0	46.1809	35.0286
DATA	1445	17	85	66	1	DarkCorner	DarkCorner	12011.3	302.014	3.479292e+000	3.466954e+000	73	36.5	1.009278e+001	0	0	0	0	0	0	-3.32421	0	0	49.1849	35.0263
DATA	1446	18	1	66	1	DarkCorner	DarkCorner	9890.52	307.746	3.566229e+000	3.553583e+000	61	32	5.899107e+000	0	0	0	0	0	0	-4.75077	0	0	47.2035	32.4412
DATA	1447	18	2	66	1	DarkCorner	DarkCorner	9916.08	308.113	3.582747e+000	3.570042e+000	59	37	7.497547e+000	0	0	0	0	0	0	-9.11266	0	0	46.8651	36.1892
DATA	1448	18	3	66	1	DarkCorner	DarkCorner	9942.42	307.573	3.597338e+000	3.584582e+000	53	33	7.382796e+000	0	0	0	0	0	0	-12.8987	0	0	57.5363	34.5455
DATA	1449	18	4	0	0	A_42_P608713	TC595074	9967.43	308.032	8.128035e+002	8.135987e+001	763	35	9.579328e+000	0	0	0	0	0	0	689.492	1	1	44.0646	35.9259
DATA	1450	18	5	0	0	A_44_P411771	XM_001056376	9992.72	308.169	8.398596e+002	8.406333e+001	756	42	1.462143e+001	0	0	0	0	0	0	710.526	1	1	45.4864	44.1765
DATA	1451	18	6	0	0	A_42_P703647	NM_001108688	10018.5	307.648	2.784280e+001	4.561972e+000	90	36	8.389462e+000	0	0	0	0	0	0	23.5042	1	1	57.5363	35.4375
DATA	1452	18	7	0	0	A_64_P139212	NM_001030052	10043.6	308.313	2.669214e+004	2.669217e+003	22038	41	9.281992e+000	0	0	0	0	0	0	22497.5	1	1	44.7812	39.6538
DATA	1453	18	8	0	0	A_64_P082461	FQ211879	10068.8	308.141	1.428795e+002	1.474022e+001	189	36	1.054761e+001	0	0	0	0	0	0	120.298	1	1	45.4864	35.5714
DATA	1454	18	9	0	0	A_64_P144053	NM_001108100	10094.5	307.818	3.888849e+002	3.905712e+001	377	33	8.369423e+000	0	0	0	0	0	0	327.228	1	1	46.1809	33.2059
DATA	1455	18	10	0	0	A_42_P455802	NM_001013929	10119.9	308.057	3.429160e+003	3.429352e+002	2918	35	9.955816e+000	0	0	0	0	0	0	2885.17	1	1	46.8651	36.5806
DATA	1456	18	11	0	0	A_44_P575367	ENSRNOT00000068160	10145.1	308.235	5.989155e+000	3.673785e+000	73	36	1.060506e+001	0	0	0	0	0	0	5.04073	1	0	46.1809	36.0571
DATA	1457	18	12	0	0	A_64_P008259	ENSRNOT00000040453	10170.5	308	2.437270e+003	2.437539e+002	2106	36	1.054482e+001	0	0	0	0	0	0	2052.85	1	1	48.5334	38.4545
DATA	1458	18	13	0	0	A_44_P433935	NM_001024894	10196	308	1.485129e+001	3.910707e+000	80.5	38	7.978309e+000	0	0	0	0	0	0	12.5233	1	0	54.9904	37.8182
DATA	1459	18	14	0	0	A_64_P027747	TC585156	10221.3	308.1	8.229911e+003	8.229990e+002	6848.5	33	6.602098e+000	0	0	0	0	0	0	6950.45	1	1	47.2035	33.3438
DATA	1460	18	15	0	0	A_44_P247880	ENSRNOT00000032333	10246.9	308.065	1.876891e+001	4.064676e+000	83.5	36	7.314758e+000	0	0	0	0	0	0	15.881	1	1	54.4085	36.4545
DATA	1461	18	16	0	0	A_44_P422321	NM_001105813	10272.4	308.13	2.336868e+003	2.337145e+002	2061	35	1.103095e+001	0	0	0	0	0	0	1981.7	1	1	46.8651	35.5909
DATA	1462	18	17	0	0	A_44_P374824	ENSRNOT00000025777	10297.5	308	6.686025e+001	7.588152e+000	125	34	7.035297e+000	0	0	0	0	0	0	56.8397	1	1	54.1152	33.4333
DATA	1463	18	18	0	0	A_64_P029482	A_64_P029482	10323.1	308.386	5.253277e+001	6.356196e+000	114	38	8.863525e+000	0	0	0	0	0	0	44.7863	1	1	57.259	37.3
DATA	1464	18	19	0	0	A_64_P083918	NM_053396	10348.2	308.391	1.777703e+001	3.985850e+000	85	36	6.806859e+000	0	0	0	0	0	0	15.2017	1	0	47.2035	36
DATA	1465	18	20	1028	1	(+)E1A_r60_3	E1A_r60_3	10373.6	308.404	2.888208e+001	4.580886e+000	94	36	6.286829e+000	0	0	0	0	0	0	24.7799	1	1	57.8122	35.7037
DATA	1466	18	21	0	0	A_42_P508415	CV108834	10399.5	308.288	1.574687e+002	1.614051e+001	202	39	1.057150e+001	0	0	0	0	0	0	135.589	1	1	48.5334	40.44
DATA	1467	18	22	0	0	A_64_P018331	NM_001107720	10424.5	308.296	2.026621e+003	2.026929e+002	1796	37	5.467836e+000	0	0	0	0	0	0	1751.49	1	1	47.8731	37.5217
DATA	1468	18	23	0	0	A_64_P142056	NM_001011938	10449.9	308.382	1.049583e+004	1.049588e+003	9128.5	37	7.212880e+000	0	0	0	0	0	0	9106.57	1	1	46.1809	36.4444
DATA	1469	18	24	0	0	A_44_P1030098	NM_001105866	10475.4	308.427	2.435542e+002	2.460586e+001	275.5	35	7.653001e+000	0	0	0	0	0	0	212.184	1	1	57.5363	35.6
DATA	1470	18	25	0	0	A_64_P125958	NM_177933	10500.6	308.427	5.711096e+001	6.691489e+000	119	37.5	1.119011e+001	0	0	0	0	0	0	49.9639	1	1	65	38.4615
DATA	1471	18	26	0	0	A_64_P002066	XM_001056138	10526.4	308.427	5.646322e+001	6.628209e+000	122.5	38	9.867971e+000	0	0	0	0	0	0	49.6164	1	1	57.5363	36.6552
DATA	1472	18	27	0	0	A_42_P521242	ENSRNOT00000003841	10551.5	308.362	3.050179e+003	3.050375e+002	2701	40.5	1.128430e+001	0	0	0	0	0	0	2692.12	1	1	47.5395	39.8462
DATA	1473	18	28	0	0	A_42_P652827	NM_001024274	10576.9	308.379	3.374398e+003	3.374573e+002	2985	36.5	1.132432e+001	0	0	0	0	0	0	2991.9	1	1	45.4864	38.0333
DATA	1474	18	29	0	0	A_42_P533792	NM_001106575	10602.5	308.614	1.024882e+004	1.024888e+003	8856.5	32.5	8.457770e+000	0	0	0	0	0	0	9129.44	1	1	47.5395	34.2647
DATA	1475	18	30	1028	1	(+)E1A_r60_1	E1A_r60_1	10627.6	308.427	3.421065e+000	3.408941e+000	68.5	36	1.199324e+001	0	0	0	0	0	0	0.0644539	0	0	57.5363	38
DATA	1476	18	31	0	0	A_64_P210103	NM_001100666	10653.3	308.5	7.731266e+001	8.442913e+000	142	36	1.135930e+001	0	0	0	0	0	0	69.5185	1	1	57.5363	38.2857
DATA	1477	18	32	0	0	A_64_P131745	A_64_P131745	10678.5	308.5	5.734499e+001	6.654879e+000	122	38	9.921949e+000	0	0	0	0	0	0	51.806	1	1	57.5363	38.4848
DATA	1478	18	33	0	0	A_64_P017791	XM_002727063	10703.9	308.5	6.797702e+000	3.428939e+000	73	34	6.454050e+000	0	0	0	0	0	0	6.17023	1	0	56.9804	35.1071
DATA	1479	18	34	0	0	A_42_P560288	NM_198788	10729.4	308.594	1.257986e+004	1.257990e+003	10994	33	9.379387e+000	0	0	0	0	0	0	11473	1	1	47.5395	33.5172
DATA	1480	18	35	0	0	A_42_P571463	NM_001013221	10754.6	308.64	2.141228e+003	2.141487e+002	1954	39	9.540152e+000	0	0	0	0	0	0	1961.95	1	1	48.8603	38.8333
DATA	1481	18	36	0	0	A_42_P648207	NM_001013882	10780.1	308.5	8.664621e+002	8.670956e+001	874.5	35	7.485783e+000	0	0	0	0	0	0	797.621	1	1	56.9804	35.4138
DATA	1482	18	37	0	0	A_64_P120833	NM_131910	10805.6	308.746	1.225103e+004	1.225108e+003	11170	36	9.906553e+000	0	0	0	0	0	0	11329.9	1	1	47.5395	37.1613
DATA	1483	18	38	0	0	A_42_P705337	TC582694	10830.8	308.884	2.806049e+003	2.806241e+002	2621	36	8.067424e+000	0	0	0	0	0	0	2606.72	1	1	46.5243	35.4
DATA	1484	18	39	0	0	A_44_P544340	NM_001034939	10856.3	308.729	7.031974e+002	7.039570e+001	727	31	9.489686e+000	0	0	0	0	0	0	656.152	1	1	46.8651	33.8519
DATA	1486	18	41	0	0	A_44_P310596	NM_001014166	10906.8	308.761	8.333952e+002	8.340254e+001	841	34	6.698504e+000	0	0	0	0	0	0	784.279	1	1	46.8651	34.9688
DATA	1487	18	42	0	0	A_64_P013409	A_64_P013409	10932.6	308.688	5.645772e+000	3.277268e+000	77	34	8.369073e+000	0	0	0	0	0	0	5.33514	1	0	44.4243	34.6
DATA	1488	18	43	0	0	A_64_P076485	A_64_P076485	10957.6	308.786	2.051915e+003	2.052167e+002	2023	38	9.525803e+000	0	0	0	0	0	0	1946.56	1	1	51.4001	37.0313
DATA	1489	18	44	0	0	A_64_P096121	ENSRNOT00000028891	10982.9	309.107	5.174646e+001	6.086033e+000	121	37.5	9.124460e+000	0	0	0	0	0	0	49.2765	1	1	47.5395	37.775
DATA	1490	18	45	0	0	A_42_P521086	NM_001100857	11008.7	308.622	6.518260e+001	7.257813e+000	132	36	8.772204e+000	0	0	0	0	0	0	62.2984	1	1	48.5334	35.5185
DATA	1491	18	46	0	0	A_64_P143133	TC637520	11033.7	308.914	2.363578e+001	3.962990e+000	95	38	8.745067e+000	0	0	0	0	0	0	22.6672	1	1	46.8651	38.4286
DATA	1492	18	47	0	0	A_64_P067163	NM_017248	11059.4	308.573	4.831169e+004	4.831170e+003	46292	37.5	9.413856e+000	0	0	0	0	0	0	46484.3	1	1	57.5363	38
DATA	1493	18	48	0	0	A_64_P118288	NM_053448	11085	309.226	4.579274e+002	4.590169e+001	509	39	8.172600e+000	0	0	0	0	0	0	441.983	1	1	45.4864	40.5161
DATA	1494	18	49	0	0	A_64_P112342	A_64_P112342	11110.1	308.879	5.165231e+001	6.050951e+000	120.5	40	1.105394e+001	0	0	0	0	0	0	49.9933	1	1	43.7019	41.5
DATA	1495	18	50	0	0	A_64_P074741	NM_001077680	11135.5	308.648	5.950338e+001	6.729708e+000	129	38	1.053422e+001	0	0	0	0	0	0	57.7434	1	1	57.5363	38.6452
DATA	1496	18	51	0	0	A_64_P153062	NM_001107890	11161.3	308.884	3.901922e+002	3.914504e+001	451	34	5.915598e+000	0	0	0	0	0	0	379.579	1	1	46.1809	34.0741
DATA	1497	18	52	0	0	A_64_P051942	A_64_P051942	11186.1	309.048	3.411408e+002	3.425731e+001	407	44	9.761711e+000	0	0	0	0	0	0	332.566	1	1	45.835	42.4286
DATA	1498	18	53	0	0	A_44_P233080	ENSRNOT00000026303	11211.6	309.051	6.143039e+003	6.143118e+002	5958	40.5	8.670694e+000	0	0	0	0	0	0	6000.15	1	1	49.1849	41.0294
DATA	1499	18	54	0	0	A_64_P127747	A_64_P127747	11237	309.26	9.489739e+001	9.988879e+000	165	34	8.903838e+000	0	0	0	0	0	0	92.8446	1	1	47.5395	35.2759
DATA	1500	18	55	0	0	A_42_P773155	NM_001106996	11262.4	309	3.319363e+004	3.319364e+003	32170	39	6.781910e+000	0	0	0	0	0	0	32520.2	1	1	49.8279	39.0741
DATA	1501	18	56	0	0	A_64_P003624	NM_175591	11287.7	309.208	6.006716e+001	6.764232e+000	130	42	1.349655e+001	0	0	0	0	0	0	58.9145	1	1	47.5395	42.9032
DATA	1502	18	57	0	0	A_64_P148728	NM_030989	11313.3	308.971	3.964789e+002	3.976950e+001	458.5	40	6.485637e+000	0	0	0	0	0	0	389.189	1	1	46.1809	40.2857
DATA	1503	18	58	0	0	A_44_P436284	ENSRNOT00000031389	11338.5	309	5.546513e+002	5.555203e+001	611.5	38	8.687173e+000	0	0	0	0	0	0	544.744	1	1	54.1152	38.7568
DATA	1504	18	59	0	0	A_42_P626851	NM_001107917	11364.1	309	1.281007e+003	1.281383e+002	1322	39	8.460383e+000	0	0	0	0	0	0	1258.43	1	1	46.8651	38.2432
DATA	1505	18	60	0	0	A_42_P797303	TC587453	11389.5	309	1.933309e+004	1.933311e+003	18873	39	1.149684e+001	0	0	0	0	0	0	18991.1	1	1	48.5334	39.0345
DATA	1506	18	61	0	0	A_64_P096312	A_64_P096312	11414.4	309.638	2.719097e+003	2.719275e+002	2987	37	9.504290e+000	0	1	0	0	0	0	2670.14	1	1	39.4933	35.375
DATA	1507	18	62	0	0	A_64_P150894	A_64_P150894	11440.3	309.078	3.702692e+002	3.715720e+001	436	37	7.762684e+000	0	0	0	0	0	0	363.33	1	1	49.1849	36.5
DATA	1508	18	63	0	0	A_64_P241372	NM_001000593	11465.5	309.443	3.115993e+001	4.403826e+000	101	38	8.526761e+000	0	0	0	0	0	0	30.5461	1	1	46.5243	40.4375
DATA	1509	18	64	0	0	A_44_P433621	NM_001025016	11491.1	309.386	5.195472e+002	5.204809e+001	574.5	48	2.233988e+001	0	0	0	0	1	0	508.621	1	1	57.259	55.4848
DATA	1510	18	65	0	0	A_64_P163511	NM_013190	11516.4	309.113	1.801984e+003	1.802254e+002	1716	44.5	1.347725e+001	0	0	0	0	0	0	1761.1	1	1	47.5395	44.7273
DATA	1511	18	66	0	0	A_44_P129412	AF155959	11541.8	309.274	6.985649e+002	6.992647e+001	730	26	7.049070e+000	0	0	0	0	1	0	681.346	1	1	48.2044	25.5758
DATA	1512	18	67	0	0	A_64_P143037	NM_001025134	11567.2	309.015	6.721739e+001	7.416957e+000	134	28	5.331845e+000	0	0	0	0	1	0	65.4048	1	1	46.8651	28
DATA	1513	18	68	0	0	A_64_P032693	XM_002724830	11592.6	309.427	3.495511e+001	4.701130e+000	106.5	29	5.765618e+000	0	0	0	0	1	0	33.9219	1	1	57.5363	29.3878
DATA	1514	18	69	0	0	A_42_P727368	NM_001025693	11618	309.455	8.118432e+001	8.709277e+000	150	30.5	9.341081e+000	0	0	0	0	0	0	78.5445	1	1	55.8519	32.3235
DATA	1515	18	70	0	0	A_64_P075765	A_64_P075765	11643.4	309.427	8.111262e+001	8.706508e+000	146.5	33	1.580439e+001	0	0	0	0	0	0	78.2076	1	1	57.5363	37.5641
DATA	1516	18	71	0	0	A_42_P639174	NM_001106592	11668.9	309.352	1.884947e+003	1.885214e+002	1905	31	7.038564e+000	0	0	0	0	1	0	1810.57	1	1	47.8731	30.1
DATA	1517	18	72	0	0	A_64_P063135	NM_001109623	11694.4	309.427	8.025415e+001	8.635851e+000	149	34.5	8.073734e+000	0	0	0	0	0	0	76.7691	1	1	57.5363	35
DATA	1518	18	73	0	0	A_64_P018236	NM_001108882	11719.6	309.427	1.249000e+001	3.438235e+000	86.5	35	6.798204e+000	0	0	0	0	0	0	11.8946	1	0	57.5363	35.0417
DATA	1519	18	74	0	0	A_43_P14648	NM_001012034	11744.6	309.593	1.147766e+003	1.148217e+002	1145	34	8.204127e+000	0	0	0	0	0	0	1087.87	1	1	50.7771	34.3333
DATA	1520	18	75	0	0	A_42_P698520	NM_001108216	11770.2	309.644	8.941819e+003	8.941877e+002	8341	37	1.125951e+001	0	0	0	0	0	0	8430.8	1	1	48.5334	38.0357
DATA	1521	18	76	0	0	A_43_P19450	NM_001105713	11795.5	309.614	2.241909e+002	2.265395e+001	281.5	33	8.172844e+000	0	0	0	0	0	0	210.207	1	1	47.5395	34.6538
DATA	1522	18	77	0	0	A_64_P013012	XM_225619	11820.9	309.47	4.550827e+002	4.562582e+001	500	36	9.223658e+000	0	0	0	0	0	0	424.17	1	1	45.4864	36.4
DATA	1523	18	78	0	0	A_42_P499684	NM_001108642	11846.5	309.638	6.099830e+002	6.108717e+001	647	41	1.047125e+001	0	0	0	0	0	0	564.956	1	1	47.5395	41.2703
DATA	1524	18	79	0	0	A_64_P297479	ENSRNOT00000044350	11871.9	309.934	2.432320e+004	2.432322e+003	23864	42.5	9.261218e+000	0	0	0	0	0	0	22378.8	1	1	45.1352	41.3125
DATA	1525	18	80	0	0	A_64_P103238	NM_001014158	11897.3	309.9	6.132455e+002	6.141539e+001	623	38	1.204029e+001	0	0	0	0	0	0	560.256	1	1	47.2035	38.2593
DATA	1526	18	81	0	0	A_42_P751562	NM_001037355	11922.7	309.618	6.880293e+003	6.880376e+002	6274	34	9.623632e+000	0	0	0	0	0	0	6239.14	1	1	46.5243	36.7143
DATA	1527	18	82	66	1	DarkCorner	DarkCorner	11948.1	309.5	3.402573e+000	3.390506e+000	68	36	5.860319e+000	0	0	0	0	0	0	-8.16742	0	0	65	35.48
DATA	1528	18	83	66	1	DarkCorner	DarkCorner	11972.9	309.121	3.429940e+000	3.417777e+000	69	37	8.808609e+000	0	0	0	0	0	0	-4.25703	0	0	46.1809	37.2703
DATA	1529	18	84	66	1	DarkCorner	DarkCorner	11998.7	309.514	3.459478e+000	3.447210e+000	73	40	8.591247e+000	0	0	0	0	0	0	-1.34808	0	0	47.2035	38.5714
DATA	1530	18	85	66	1	DarkCorner	DarkCorner	12024.4	309.573	3.490573e+000	3.489950e+000	76	32	8.259610e+000	0	0	0	0	0	0	2.5102	0	0	57.5363	32.7882
DATA	1531	19	1	66	1	DarkCorner	DarkCorner	9878.34	315.029	3.557939e+000	3.545322e+000	66.5	31	7.550693e+000	0	0	0	0	0	0	-3.51088	0	0	45.835	31.5124
DATA	1532	19	2	66	1	DarkCorner	DarkCorner	9903.73	315.197	3.575348e+000	3.562669e+000	62	33	5.923982e+000	0	0	0	0	0	0	-4.51152	0	0	47.2035	31.7368
DATA	1533	19	3	66	1	DarkCorner	DarkCorner	9929	315.227	3.590395e+000	3.577663e+000	54.5	36.5	7.076902e+000	0	0	0	0	0	0	-11.4523	0	0	46.1809	35.4444
DATA	1534	19	4	66	1	DarkCorner	DarkCorner	9954.37	314.864	3.603289e+000	3.590511e+000	60	34	8.487458e+000	0	0	0	0	0	0	-7.27456	0	0	42.9674	34.4138
DATA	1535	19	5	0	0	A_44_P198705	NM_012578	9980.2	315.239	1.539126e+004	1.539130e+003	12697	41	1.059671e+001	0	0	0	0	0	0	13037.5	1	1	46.8651	41.9032
DATA	1536	19	6	0	0	A_42_P604252	NM_001108797	10005.5	315.5	1.160254e+003	1.160816e+002	1024	35	1.251447e+001	0	0	0	0	0	0	980.483	1	1	49.1849	37.9688
DATA	1537	19	7	0	0	A_43_P20016	NM_001107377	10031.1	315.386	1.204189e+002	1.257329e+001	169.5	36.5	8.266174e+000	0	0	0	0	0	0	101.573	1	1	57.259	35.8438
DATA	1538	19	8	0	0	A_42_P491486	NM_022533	10056.3	315.595	6.756730e+003	6.756827e+002	5513	41	7.753617e+000	0	0	0	0	0	0	5691.9	1	1	48.5334	39.8696
DATA	1539	19	9	0	0	A_64_P345929	NM_001191639	10081.6	315.918	3.154956e+001	4.805094e+000	95	34	7.278305e+000	0	0	0	0	0	0	26.5564	1	1	48.5334	33.525
DATA	1540	19	10	0	0	A_64_P152047	NM_001000521	10107.2	315.541	9.387180e+000	3.745003e+000	76.5	34	8.914472e+000	0	0	0	0	0	0	7.8989	1	0	48.8603	35.0303
DATA	1541	19	11	0	0	A_42_P724510	NM_001007625	10132.6	315.122	1.453662e+004	1.453667e+003	11960	40	9.871964e+000	0	0	0	0	0	0	12233.5	1	1	48.5334	41.2069
DATA	1542	19	12	0	0	A_42_P552906	NM_001007701	10158	315.271	2.618266e+003	2.618516e+002	2243	36	8.773834e+000	0	0	0	0	0	0	2204.69	1	1	46.8651	35.8611
DATA	1543	19	13	0	0	A_64_P121673	A_64_P121673	10183.1	315.603	1.696638e+001	3.997347e+000	83.5	35	7.753594e+000	0	0	0	0	0	0	14.3002	1	0	48.5334	36.7586
DATA	1544	19	14	0	0	A_64_P047470	NM_001008875	10208.6	315.427	6.381940e+001	7.334429e+000	118	33	8.016113e+000	0	0	0	0	0	0	53.8637	1	1	57.5363	34.25
DATA	1545	19	15	0	0	A_43_P14911	NM_031512	10234.4	315.427	6.239361e+001	7.207539e+000	122	34	7.552967e+000	0	0	0	0	0	0	52.7527	1	1	57.5363	34.7742
DATA	1546	19	16	0	0	A_44_P117234	NM_001191788	10259.6	315.427	3.410660e+001	4.959684e+000	97.5	35.5	7.287374e+000	0	0	0	0	0	0	28.8955	1	1	57.5363	34.9286
DATA	1547	19	17	0	0	A_64_P066782	ENSRNOT00000046676	10284.9	315.288	6.087837e+002	6.098426e+001	589	35	9.564495e+000	0	0	0	0	0	0	516.993	1	1	48.5334	34.2903
DATA	1548	19	18	0	0	A_64_P125013	NM_019167	10310.4	315.427	7.079947e+004	7.079948e+003	59948.5	36	8.682203e+000	0	0	0	0	0	0	60286.4	1	1	57.5363	35.2258
DATA	1549	19	19	0	0	A_64_P143121	NM_001099510	10335.7	315.5	1.723792e+001	3.966319e+000	83	36.5	6.931422e+000	0	0	0	0	0	0	14.7214	1	0	57.5363	36.2692
DATA	1550	19	20	0	0	A_64_P065600	NM_022954	10361.3	315.5	4.448611e+000	3.588284e+000	71	35.5	6.702115e+000	0	0	0	0	0	0	3.81148	1	0	57.5363	34.7188
DATA	1551	19	21	0	0	A_44_P300818	AF030087	10386.5	315.5	1.004796e+003	1.005423e+002	926.5	38	8.520172e+000	0	0	0	0	0	0	863.826	1	1	57.5363	36.52
DATA	1552	19	22	0	0	A_64_P103130	A_64_P103130	10411.7	316.068	1.893396e+003	1.893726e+002	1766	36.5	7.626674e+000	0	0	0	0	0	0	1633.7	1	1	43.7019	36.6154
DATA	1553	19	23	0	0	A_64_P064938	NM_001109332	10437.4	315.573	1.568401e+001	3.855393e+000	85.5	35	7.818354e+000	0	0	0	0	0	0	13.5852	1	0	65	36.28
DATA	1554	19	24	0	0	A_64_P087276	NM_138527	10462.6	315.573	3.520469e+000	3.507984e+000	68	36	5.806157e+000	0	0	0	0	0	0	-0.000433195	0	0	57.5363	37.5652
DATA	1555	19	25	0	0	A_64_P032728	NM_001037778	10488.1	315.425	1.838020e+004	1.838023e+003	15931	38	8.727763e+000	0	0	0	0	0	0	16051	1	1	48.5334	39.5769
DATA	1556	19	26	0	0	A_44_P956203	NM_001134992	10513.5	315.5	2.455993e+001	4.258037e+000	90.5	38	9.774961e+000	0	0	0	0	0	0	21.54	1	1	57.5363	38.3704
DATA	1557	19	27	0	0	A_64_P106488	A_64_P106488	10538.7	315.5	6.935863e+001	7.752405e+000	132.5	41	1.129279e+001	0	0	0	0	0	0	61.0968	1	1	57.5363	42.2069
DATA	1558	19	28	0	0	A_43_P10011	NM_001025274	10564.2	315.492	1.078163e+003	1.078714e+002	1025	40.5	1.097255e+001	0	0	0	0	0	0	954.052	1	1	45.4864	39.7857
DATA	1559	19	29	0	0	A_44_P321009	NM_012540	10589.1	315.892	1.085958e+001	3.599648e+000	75	36	9.524228e+000	0	0	0	0	0	0	9.65311	1	0	47.8731	37.2286
DATA	1560	19	30	0	0	A_44_P133453	XM_236776	10614.8	315.93	4.067525e+003	4.067668e+002	3574.5	34	1.068544e+001	0	0	0	0	0	0	3632.68	1	1	46.8651	36.6486
DATA	1561	19	31	0	0	A_64_P027323	NM_001000088	10640	316.424	7.490211e+001	8.225716e+000	137	35	1.031464e+001	0	0	0	0	0	0	67.2085	1	1	45.4864	35.6757
DATA	1562	19	32	0	0	A_44_P374568	NM_001107778	10665.5	316.324	4.263286e+002	4.276693e+001	434.5	41	1.074854e+001	0	0	0	0	0	0	384.356	1	1	46.5243	40.2581
DATA	1563	19	33	0	0	A_64_P040176	NM_001108498	10691.3	315.9	2.916241e+003	2.916436e+002	2699.5	36	8.065465e+000	0	0	0	0	0	0	2641.76	1	1	47.2035	35.8621
DATA	1564	19	34	0	0	A_64_P347204	ENSRNOT00000002350	10716.6	315.851	1.704572e+002	1.737213e+001	226	31.5	6.648388e+000	0	0	0	0	1	0	155.144	1	1	46.1809	29.8571
DATA	1565	19	35	0	0	A_64_P142544	A_64_P142544	10742	315.545	1.491224e+001	3.654199e+000	82	41	8.516139e+000	0	0	0	0	0	0	13.6364	1	0	65	40.2692
DATA	1566	19	36	0	0	A_64_P047367	NM_017050	10767.5	315.648	7.615003e+004	7.615003e+003	68532	38	6.141891e+000	0	0	0	0	0	0	69962.9	1	1	57.5363	37.625
DATA	1567	19	37	0	0	A_64_P130858	NM_001003705	10792.6	315.947	1.071325e+002	1.121153e+001	166	35	9.738105e+000	0	0	0	0	0	0	98.8799	1	1	49.1849	36.3571
DATA	1568	19	38	0	0	A_42_P647009	NM_053814	10818.1	315.896	3.400748e+003	3.400907e+002	3139	38	8.768927e+000	0	0	0	1	0	0	3153.19	1	1	46.8651	37.4138
DATA	1569	19	39	0	0	A_42_P618538	NM_001030031	10843.5	316.273	1.670454e+003	1.670775e+002	1592	30	8.825512e+000	0	0	0	0	0	0	1555.84	1	1	46.5243	32.2
DATA	1570	19	40	0	0	A_64_P048225	NM_001108643	10868.8	315.985	3.989909e+001	5.153121e+000	106	34	9.943400e+000	0	0	0	0	0	0	37.3234	1	1	45.4864	35.0606
DATA	1571	19	41	0	0	A_64_P044826	A_64_P044826	10894	315.912	1.792550e+002	1.821727e+001	240	37.5	8.518067e+000	0	0	0	0	0	0	168.396	1	1	46.8651	37.8333
DATA	1572	19	42	0	0	A_64_P046273	NM_001168559	10919.6	315.972	3.589231e+002	3.603769e+001	411	34	7.756925e+000	0	0	0	0	0	0	338.597	1	1	48.2044	35.6452
DATA	1573	19	43	0	0	A_43_P16232	NM_024395	10945	315.797	1.982097e+003	1.982358e+002	1863	37	9.796069e+000	0	0	0	0	0	0	1877.38	1	1	46.8651	36.5
DATA	1574	19	44	0	0	A_44_P147356	XM_225859	10970.3	316.026	1.377398e+004	1.377402e+003	13071	38	1.027505e+001	0	0	0	0	0	0	13096.8	1	1	49.1849	38.6875
DATA	1575	19	45	0	0	A_44_P979417	ENSRNOT00000068382	10996	316	2.671568e+001	4.165790e+000	99	37	7.439705e+000	0	0	0	0	0	0	25.4981	1	1	54.9904	36.2778
DATA	1576	19	46	0	0	A_44_P283784	NM_001107682	11021.4	316.072	5.187370e+002	5.197139e+001	569	39	7.864148e+000	0	0	0	0	0	0	496.853	1	1	46.5243	38.5
DATA	1577	19	47	0	0	A_44_P112061	ENSRNOT00000046359	11046.8	316	7.703356e+002	7.709893e+001	791	37	7.952749e+000	0	0	0	0	0	0	740.325	1	1	46.8651	37.0606
DATA	1578	19	48	0	0	A_42_P541025	NM_212546	11071.8	316.044	2.712990e+002	2.731383e+001	335.5	38	9.133560e+000	0	0	0	0	0	0	261.544	1	1	46.5243	39.5405
DATA	1579	19	49	0	0	A_44_P156521	NM_001025135	11097.5	316.173	9.292590e+002	9.297944e+001	970	42.5	9.567573e+000	0	0	0	0	0	0	898.543	1	1	51.0895	43.5385
DATA	1580	19	50	0	0	A_42_P562202	NM_001107959	11122.9	315.825	6.483012e+001	7.206161e+000	132	41	1.177289e+001	0	0	0	0	0	0	62.859	1	1	45.4864	42.6207
DATA	1581	19	51	0	0	A_42_P522899	NM_021578	11148.3	316.132	1.204199e+002	1.244422e+001	186	34	8.187910e+000	0	0	0	0	0	0	117.055	1	1	45.835	34.5517
DATA	1582	19	52	0	0	A_42_P581060	NM_001108722	11173.8	316.125	1.354088e+004	1.354092e+003	13029.5	36	8.057368e+000	0	0	0	0	0	0	13192.8	1	1	47.5395	37.7241
DATA	1583	19	53	0	1	ERCC-00043_129	ERCC-00043_129	11199.1	316.386	7.109282e+000	3.204571e+000	77	41.5	8.473660e+000	0	0	0	0	0	0	6.94078	1	0	57.259	41.6071
DATA	1584	19	54	0	0	A_64_P098577	A_64_P098577	11224.5	316.352	5.443439e+000	3.166269e+000	75	38	7.512825e+000	0	0	0	0	0	0	5.32394	1	0	57.5363	38.4063
DATA	1585	19	55	0	0	A_64_P043164	ENSRNOT00000009696	11249.6	316.233	3.582708e+002	3.596220e+001	421	36	7.548815e+000	0	0	0	0	0	0	350.933	1	1	48.8603	36.7692
DATA	1586	19	56	0	0	A_42_P576446	NM_001107673	11275.3	316.338	8.425743e+003	8.425800e+002	8134.5	39	8.461241e+000	0	0	0	0	0	0	8263.79	1	1	48.5334	39.5
DATA	1587	19	57	0	0	A_42_P801593	NM_001134744	11300.6	316.027	2.314697e+003	2.314906e+002	2335	43.5	1.075206e+001	0	0	0	0	0	0	2272.37	1	1	48.5334	43.0417
DATA	1588	19	58	0	0	A_42_P535743	NM_199393	11326	316.455	5.063727e+003	5.063822e+002	4924.5	38	1.033741e+001	0	0	0	0	0	0	4974.75	1	1	55.8519	38.8276
DATA	1589	19	59	0	0	A_64_P051890	ENSRNOT00000056631	11351	316.235	2.576061e+001	4.033743e+000	97	37	7.640230e+000	0	0	0	0	0	0	25.3176	1	1	46.1809	38.2571
DATA	1590	19	60	0	0	A_64_P098379	NM_001013890	11376.6	316.427	2.944754e+001	4.278347e+000	102	39	9.635285e+000	0	0	0	0	0	0	28.9447	1	1	57.5363	39
DATA	1591	19	61	0	0	A_64_P144513	XR_086096	11402.4	316.427	6.325433e+004	6.325433e+003	62024	30.5	1.201441e+001	0	0	0	0	0	0	62161.2	1	1	57.5363	34.5417
DATA	1592	19	62	0	0	A_44_P325337	NM_001030041	11427.3	316.5	1.121192e+002	1.163415e+001	185	37.5	6.301402e+000	0	0	0	0	0	0	110.126	1	1	47.2035	37.8214
DATA	1593	19	63	0	0	A_44_P142029	NM_001002851	11452.7	316.483	7.653395e+003	7.653458e+002	7469	38	8.698423e+000	0	0	0	0	0	0	7511.08	1	1	52.3208	39.3448
DATA	1594	19	64	0	0	A_44_P292568	NM_001000207	11478.2	316.314	1.183769e+002	1.223994e+001	192	42.5	1.441542e+001	0	0	0	0	0	0	116.039	1	1	47.2035	45.7857
DATA	1595	19	65	0	0	A_42_P624092	XR_007263	11504	316.5	9.613080e+003	9.613130e+002	9202.5	44.5	1.144849e+001	0	0	0	0	0	0	9409.09	1	1	48.5334	46.6333
DATA	1596	19	66	0	0	A_42_P597322	NM_001103357	11529	316.413	5.742085e+002	5.750568e+001	623	29	1.208811e+001	0	0	0	0	0	0	561.012	1	1	49.1849	33.2593
DATA	1597	19	67	0	0	A_64_P034409	NM_001108146	11554.5	316.5	2.005502e+002	2.029768e+001	261	25	5.955931e+000	0	0	0	0	1	0	195.517	1	1	57.5363	24.8387
DATA	1598	19	68	0	0	A_64_P112797	NM_001001121	11579.9	316.5	5.388420e+001	6.235074e+000	114	29	5.082182e+000	0	0	0	0	1	0	52.4002	1	1	56.9804	29.2286
DATA	1599	19	69	0	0	A_42_P761023	NM_001144870	11605.4	316.573	2.602689e+002	2.621634e+001	303	28	7.106421e+000	0	0	0	1	1	0	252.377	1	1	57.5363	29.2683
DATA	1600	19	70	0	0	A_42_P465408	NM_031647	11630.5	316.62	8.450811e+002	8.456702e+001	864	44.5	2.249649e+001	0	0	0	1	1	0	816.869	1	1	50.1463	51.6667
DATA	1601	19	71	0	0	A_64_P115761	NM_001109379	11656.5	317.636	1.190530e+002	1.231938e+001	182.5	33	1.209794e+001	0	0	0	0	0	0	114.673	1	1	38.6789	35.0588
DATA	1602	19	72	0	0	A_64_P086487	A_64_P086487	11681.5	316.5	2.039578e+001	3.977144e+000	92	36	7.540659e+000	0	0	0	0	0	0	19.5674	1	1	57.5363	35.3077
DATA	1603	19	73	0	0	A_42_P774028	NM_001017447	11706.6	316.506	3.215618e+003	3.215776e+002	3100.5	36.5	1.043981e+001	0	0	0	0	0	0	3072.03	1	1	52.3208	39.1
DATA	1604	19	74	0	0	A_44_P233080	ENSRNOT00000026303	11732.3	316.389	6.079453e+003	6.079537e+002	5650	34	7.118052e+000	0	0	0	0	0	0	5780.7	1	1	48.2044	34.3333
DATA	1605	19	75	0	0	A_64_P078002	ENSRNOT00000056206	11757.6	316.573	2.215056e+001	3.911797e+000	95.5	35	7.195189e+000	0	0	0	0	0	0	20.9581	1	1	57.5363	34.0435
DATA	1606	19	76	0	0	A_64_P047888	A_64_P047888	11782.7	316.629	1.043212e+001	3.405099e+000	83.5	30.5	9.454344e+000	0	0	0	0	0	0	9.81835	1	0	47.5395	32.2308
DATA	1607	19	77	0	0	A_44_P236001	NM_001000623	11808.4	316.573	8.338289e+001	8.952985e+000	154	32	1.014158e+001	0	0	0	0	0	0	78.0236	1	1	57.5363	34.4194
DATA	1608	19	78	0	0	A_42_P819040	TC636720	11833.6	316.573	1.127131e+001	3.468185e+000	84	41	9.167677e+000	0	0	0	0	0	0	10.4834	1	0	57.5363	39.25
DATA	1609	19	79	0	0	A_44_P168184	NM_001166675	11859.4	316.573	1.619159e+003	1.619495e+002	1622	42	9.345061e+000	0	0	0	0	0	0	1496.12	1	1	57.5363	42.3889
DATA	1610	19	80	0	0	A_64_P094925	NM_001024748	11884.7	317.192	4.029121e+002	4.042806e+001	446	35	1.193477e+001	0	0	0	0	0	0	369.811	1	1	47.8731	37.8519
DATA	1611	19	81	0	0	A_44_P332483	NM_173338	11910	316.545	4.351929e+000	3.376085e+000	78.5	41	1.175866e+001	0	0	0	0	0	0	3.96552	1	0	65	38.1154
DATA	1612	19	82	0	0	A_42_P530071	NM_001107153	11935.4	317	8.978930e+003	8.978993e+002	8215	37	9.852670e+000	0	0	0	0	0	0	8120.82	1	1	48.5334	37.5652
DATA	1613	19	83	66	1	DarkCorner	DarkCorner	11960.7	316.775	3.411918e+000	3.399819e+000	66	36.5	8.093697e+000	0	0	0	0	0	0	-5.83955	0	0	47.5395	36.7857
DATA	1614	19	84	66	1	DarkCorner	DarkCorner	11986.1	316.761	3.440262e+000	3.428062e+000	71	39	9.803263e+000	0	0	0	0	0	0	-3.35035	0	0	45.835	38.3056
DATA	1615	19	85	66	1	DarkCorner	DarkCorner	12011.5	316.648	3.470183e+000	3.457877e+000	68.5	37	8.665559e+000	0	0	0	0	0	0	-7.69618	0	0	65	37.1628
DATA	1616	20	1	66	1	DarkCorner	DarkCorner	9891.42	322.427	3.567471e+000	3.554820e+000	62	34	6.536678e+000	0	0	0	0	0	0	-6.16002	0	0	57.5363	34.6176
DATA	1617	20	2	66	1	DarkCorner	DarkCorner	9916.56	322.714	3.583440e+000	3.570733e+000	59	38.5	1.035878e+001	0	0	0	0	0	0	-8.101	0	0	49.8279	37
DATA	1618	20	3	66	1	DarkCorner	DarkCorner	9941.73	322.642	3.597211e+000	3.584454e+000	57	33	7.855479e+000	0	0	0	0	0	0	-10.2802	0	0	51.0895	32.5588
DATA	1619	20	4	0	0	A_42_P787775	NM_001127566	9967.5	322.571	7.256231e+002	7.265138e+001	676	39	1.088384e+001	0	0	0	0	0	0	615.529	1	1	47.2035	39.4839
DATA	1620	20	5	0	0	A_42_P607770	NM_001134616	9992.81	322.608	8.268685e+003	8.268764e+002	6872	37	1.468757e+001	0	0	0	0	0	0	6995.6	1	1	49.1849	42.5161
DATA	1621	20	6	0	0	A_42_P484738	NM_022266	10018.2	322.844	1.524848e+003	1.525276e+002	1308	36	9.488297e+000	0	0	0	0	0	0	1287.39	1	1	45.4864	36.0278
DATA	1622	20	7	0	0	A_64_P075273	NM_031743	10043.7	323.275	2.897644e+002	2.920155e+001	309	37.5	7.119961e+000	0	0	0	0	0	0	244.263	1	1	47.2035	37.4583
DATA	1623	20	8	0	0	A_42_P674050	NM_001107225	10068.9	322.768	7.004122e+003	7.004216e+002	5824	37	9.734305e+000	0	0	0	0	0	0	5898.16	1	1	46.5243	36.0294
DATA	1624	20	9	1028	1	(+)E1A_r60_a107	E1A_r60_a107	10094.5	323.048	9.015207e+000	3.735059e+000	76	34	7.083346e+000	0	0	0	0	0	0	7.58761	1	0	44.0646	34.4074
DATA	1625	20	10	0	0	A_64_P144253	NM_201350	10119.9	322.5	3.286897e+001	4.893238e+000	95	34.5	1.094354e+001	0	0	0	0	0	0	27.6618	1	1	56.9804	36.3056
DATA	1626	20	11	0	0	A_44_P791729	NM_181377	10145.4	322.573	7.918318e+003	7.918401e+002	7379	40	1.257394e+001	0	0	0	0	0	0	6666.38	1	1	57.5363	41.6944
DATA	1627	20	12	0	0	A_42_P550624	NM_001109319	10170.7	322.778	2.394182e+003	2.394455e+002	2032.5	36	7.109241e+000	0	0	0	0	0	0	2017.25	1	1	47.5395	37.1852
DATA	1628	20	13	0	0	A_43_P11580	NM_012833	10195.9	322.972	1.899885e+002	1.933998e+001	234	36	7.630443e+000	0	0	0	0	0	0	160.266	1	1	46.8651	36.9032
DATA	1629	20	14	0	0	A_44_P417055	XM_223442	10221.3	323.145	9.243817e+002	9.250866e+001	853	33	7.424755e+000	0	0	0	0	0	0	780.987	1	1	46.5243	33.6429
DATA	1630	20	15	0	0	A_64_P142867	A_64_P142867	10246.7	323.375	1.025906e+004	1.025912e+003	8608	37	8.103244e+000	0	0	0	0	0	0	8684.25	1	1	47.5395	36.6552
DATA	1631	20	16	0	0	A_64_P013002	XM_001072551	10272.4	322.573	2.825400e+001	4.573047e+000	90.5	33	8.084633e+000	0	0	0	0	0	0	23.9704	1	1	57.5363	33.1935
DATA	1632	20	17	0	0	A_42_P457692	NM_001008363	10297.8	322.831	4.682096e+003	4.682233e+002	4018	36	8.414791e+000	0	0	0	0	0	0	3982.39	1	1	47.5395	35.9394
DATA	1633	20	18	0	0	A_42_P788480	NM_019194	10322.9	322.826	9.012827e+003	9.012898e+002	7529.5	36	8.071358e+000	0	0	0	0	0	0	7687.34	1	1	46.8651	36.0357
DATA	1634	20	19	0	0	A_42_P518462	NM_001007020	10348.6	323.172	7.740372e+003	7.740455e+002	6497.5	36	8.265878e+000	0	0	0	0	0	0	6622.78	1	1	44.7812	36.4839
DATA	1635	20	20	0	0	A_64_P007578	NM_001000851	10373.5	323.056	2.239973e+001	4.200873e+000	88	38	7.778175e+000	0	0	0	0	0	0	19.2281	1	1	48.5334	36.4
DATA	1636	20	21	0	0	A_64_P139350	NM_001191727	10399.4	322.573	6.050560e+001	7.010580e+000	120	38	6.713511e+000	0	0	0	0	0	0	52.1264	1	1	57.5363	38.0741
DATA	1637	20	22	0	0	A_64_P100442	ENSRNOT00000067861	10424.5	322.648	1.930107e+002	1.962084e+001	240	36.5	9.912605e+000	0	0	0	0	0	0	166.9	1	1	57.5363	38.4545
DATA	1638	20	23	1028	1	(+)E1A_r60_a135	E1A_r60_a135	10449.6	323.241	3.526646e+000	3.514140e+000	68	35	6.744929e+000	0	0	0	0	0	0	-1.67415	0	0	49.5074	34.6957
DATA	1639	20	24	0	0	A_44_P459760	NM_001108187	10475.5	322.648	5.949642e+001	6.902558e+000	122	36	7.858117e+000	0	0	0	0	0	0	51.8642	1	1	57.5363	38
DATA	1640	20	25	0	0	A_64_P115536	NM_212545	10500.5	323	4.230992e+000	3.510538e+000	74	36	9.319281e+000	0	0	0	0	0	0	3.70373	1	0	54.1152	37.1852
DATA	1641	20	26	0	0	A_44_P538406	NM_013102	10526.2	322.897	1.934892e+004	1.934895e+003	16892.5	40	1.249216e+001	0	0	0	0	0	0	17012.5	1	1	46.5243	40.1481
DATA	1642	20	27	0	0	A_64_P120871	NM_198743	10551.6	323	8.640589e+002	8.647490e+001	840	42	1.060118e+001	0	0	0	0	0	0	763.137	1	1	48.5334	42.4194
DATA	1643	20	28	0	0	A_44_P173048	NM_001009255	10577.1	323.104	1.751455e+003	1.751792e+002	1577.5	36	1.067085e+001	0	0	0	0	0	0	1553.98	1	1	46.8651	37.4375
DATA	1644	20	29	0	0	A_64_P058060	NM_001037541	10602.4	323.152	3.364576e+001	4.799344e+000	96.5	36	8.355995e+000	0	0	0	0	0	0	29.9905	1	1	45.4864	36.4138
DATA	1645	20	30	0	0	A_64_P145982	NM_001109366	10627.5	323.588	4.700574e+001	5.805196e+000	111	33	9.904273e+000	0	0	0	0	0	0	42.0943	1	1	45.835	35.1935
DATA	1646	20	31	0	0	A_42_P514244	NM_012791	10653.2	323.273	2.211577e+002	2.237415e+001	264	38	1.050346e+001	0	0	0	0	0	0	198.992	1	1	45.835	39.2143
DATA	1648	20	33	0	0	A_64_P159155	XM_001071429	10703.9	323.065	2.431342e+001	4.146222e+000	93	34	5.616165e+000	0	0	0	0	0	0	22.0846	1	1	54.4085	31.8148
DATA	1649	20	34	0	0	A_64_P030272	ENSRNOT00000041731	10729.5	323.352	1.568418e+002	1.603639e+001	220	35	8.940917e+000	0	0	0	0	0	0	143.147	1	1	57.5363	33.76
DATA	1650	20	35	0	0	A_42_P733076	NM_001033867	10754.6	323.427	2.996143e+002	3.014559e+001	344	39	5.143928e+000	0	0	0	0	0	0	274.726	1	1	57.5363	38.72
DATA	1651	20	36	0	0	A_44_P349475	NM_031333	10780.1	323.386	8.622449e+002	8.628806e+001	873	35	8.857292e+000	0	0	0	0	0	0	794.323	1	1	57.259	36.5806
DATA	1652	20	37	0	0	A_64_P009848	NM_001034135	10805.4	323.362	5.539927e+003	5.540025e+002	5075	35.5	9.112629e+000	0	0	0	0	0	0	5126.96	1	1	47.5395	37
DATA	1653	20	38	0	0	A_64_P116685	NM_001166763	10830.4	323.471	3.692495e+003	3.692640e+002	3550	32	7.819473e+000	0	0	0	0	0	0	3432.55	1	1	52.6241	33.7813
DATA	1654	20	39	0	0	A_64_P072659	NM_001109296	10855.9	323.462	1.947564e+003	1.947838e+002	1891	33	8.497994e+000	0	0	0	0	0	0	1818.54	1	1	44.7812	34.1818
DATA	1655	20	40	0	0	A_42_P808442	NM_001108759	10881.6	323.427	6.642796e+002	6.650756e+001	675.5	35.5	8.918791e+000	0	0	0	0	0	0	622.995	1	1	57.5363	36.2
DATA	1656	20	41	0	0	A_64_P140836	NM_001017486	10906.9	323.458	1.321281e+002	1.360407e+001	195	34	8.077714e+000	0	0	0	0	0	0	124.439	1	1	47.8731	35.871
DATA	1657	20	42	0	0	A_64_P034384	NM_019227	10932.5	323.382	3.685849e+002	3.699938e+001	421.5	34	9.455328e+000	0	0	0	0	0	0	348.568	1	1	47.2035	34.375
DATA	1658	20	43	0	0	A_42_P730411	NM_001012181	10957.9	323.333	6.955987e+002	6.963404e+001	724.5	38	1.099540e+001	0	0	0	0	0	0	660.433	1	1	45.1352	38.9677
DATA	1659	20	44	0	0	A_44_P396450	ENSRNOT00000018433	10983.2	323.153	2.175096e+002	2.198523e+001	280	34.5	9.194546e+000	0	0	0	0	0	0	207.295	1	1	44.0646	35.4444
DATA	1660	20	45	0	0	A_44_P268610	NM_001109134	11008.7	323.618	6.678683e+003	6.678759e+002	6227	40	7.113529e+000	0	0	0	0	0	0	6388.47	1	1	46.5243	39.8667
DATA	1661	20	46	0	0	A_64_P059105	NM_001134544	11033.7	323.589	9.487332e+001	1.000557e+001	164	40	1.103333e+001	0	0	0	0	0	0	91.0611	1	1	48.5334	40.9714
DATA	1662	20	47	0	0	A_42_P524851	NM_001130061	11059.6	323.594	1.443395e+003	1.443743e+002	1393	35	7.705957e+000	0	0	0	0	0	0	1390.02	1	1	47.5395	36.1034
DATA	1663	20	48	0	0	A_64_P141675	FM127585	11085	323.657	2.713082e+003	2.713265e+002	2644	40.5	6.216404e+000	0	0	0	0	0	0	2620.81	1	1	45.4864	39.6667
DATA	1664	20	49	0	0	A_64_P002979	ENSRNOT00000034762	11110.1	323.278	1.109364e+001	3.338887e+000	82	39	1.116694e+001	0	0	0	0	0	0	10.7465	1	0	47.8731	41.4063
DATA	1665	20	50	0	0	A_44_P175822	NM_001109511	11135.5	323.648	1.625486e+002	1.655552e+001	228	39.5	1.103290e+001	0	0	0	0	0	0	157.883	1	1	47.8731	39.7813
DATA	1666	20	51	0	0	A_44_P1008751	NM_001137645	11160.9	323.5	2.084257e+002	2.107676e+001	270.5	33	9.298436e+000	0	0	0	0	0	0	202.932	1	1	56.9804	34.4333
DATA	1667	20	52	0	0	A_44_P255350	NM_001007674	11186.5	323.5	3.573574e+002	3.587224e+001	420	37.5	9.927949e+000	0	0	0	0	0	0	348.702	1	1	57.5363	38.7353
DATA	1668	20	53	0	0	A_64_P017328	NM_012758	11210.9	323.686	6.162624e+002	6.170520e+001	710	40	8.789268e+000	0	0	0	0	0	0	602.461	1	1	40.2912	41.5862
DATA	1669	20	54	0	0	A_64_P132571	NM_001107703	11237.1	324.031	8.699577e+003	8.699633e+002	8585	39.5	9.260511e+000	0	0	0	0	0	0	8519.66	1	1	46.8651	39.7188
DATA	1670	20	55	0	0	A_44_P107535	NM_001170336	11262.4	323.87	7.074564e+002	7.081400e+001	752	36	5.182887e+000	0	0	0	0	0	0	693.791	1	1	46.8651	36.5833
DATA	1671	20	56	0	0	A_44_P353618	NM_053587	11287.9	323.5	5.440218e+001	6.265073e+000	125	36	9.408072e+000	0	0	0	0	0	0	53.4108	1	1	65	37.3871
DATA	1672	20	57	0	0	A_44_P213336	A_44_P213336	11313.3	323.475	1.600355e+002	1.630191e+001	228	42	1.189819e+001	0	0	0	0	0	0	157.253	1	1	42.5954	44.5185
DATA	1673	20	58	0	0	A_42_P507072	FQ213070	11338.7	323.627	4.785129e+003	4.785230e+002	4735	37.5	1.057900e+001	0	0	0	0	0	0	4704.64	1	1	46.1809	39.2857
DATA	1674	20	59	0	0	A_44_P428886	NM_001099516	11364.1	323.5	2.589670e+002	2.608183e+001	340.5	36	9.485646e+000	0	0	0	0	0	0	254.676	1	1	56.9804	38.4595
DATA	1675	20	60	0	0	A_64_P086784	NM_001108657	11389.5	323.704	4.612333e+003	4.612437e+002	4535.5	39	1.182520e+001	0	0	0	0	0	0	4535.82	1	1	47.8731	38.6538
DATA	1676	20	61	0	0	A_42_P654682	NM_012724	11414.6	323.573	4.359583e+001	5.351243e+000	109.5	37.5	8.846052e+000	0	0	0	1	0	0	42.8577	1	1	57.5363	35.6
DATA	1677	20	62	0	0	A_44_P443008	NM_001013068	11440.4	324.09	5.837998e+002	5.846250e+001	656	37	9.030873e+000	0	0	0	0	0	0	573.555	1	1	46.1809	35.84
DATA	1678	20	63	0	0	A_64_P027229	A_64_P027229	11465.4	324.232	1.097926e+003	1.098366e+002	1151	38	9.438397e+000	0	0	0	0	0	0	1077.63	1	1	46.8651	38.6
DATA	1679	20	64	0	0	A_64_P134277	ENSRNOT00000029167	11491	323.545	7.648685e+001	8.257678e+000	148.5	37.5	1.003529e+001	0	0	0	0	0	0	74.9701	1	1	55.8519	40.25
DATA	1680	20	65	0	0	A_64_P165548	XM_001055860	11516.5	323.648	1.312842e+002	1.349348e+001	193.5	45	4.337582e+001	0	0	1	0	1	0	128.471	1	1	57.5363	68.1905
DATA	1681	20	66	0	0	A_64_P014737	NM_001000069	11541.6	323.573	3.657236e+001	5.046016e+000	104	27	7.121281e+000	0	0	0	0	1	0	35.7187	1	1	57.5363	26.3333
DATA	1682	20	67	0	0	A_42_P627330	NM_001106628	11567.3	324.167	2.407645e+002	2.427914e+001	298	28	5.739148e+000	0	0	0	1	1	0	234.608	1	1	45.835	27.9429
DATA	1683	20	68	0	0	A_64_P039452	NM_001109063	11593.6	324.379	1.474562e+002	1.507609e+001	196.5	27.5	5.538691e+000	0	0	0	0	1	0	143.293	1	1	42.2201	27.1579
DATA	1684	20	69	0	0	A_44_P516885	ENSRNOT00000005601	11618	323.681	4.293687e+004	4.293689e+003	42463	37	2.068312e+001	0	0	0	0	0	0	41601.2	1	1	58.0869	43.4839
DATA	1685	20	70	0	0	A_44_P839176	NM_001107114	11643.4	324.172	2.606734e+003	2.606925e+002	2591	36.5	1.516658e+001	0	0	0	0	0	0	2517.31	1	1	44.7812	40.3929
DATA	1686	20	71	0	0	A_64_P083342	AABR03026150	11668.5	324	1.826404e+002	1.853721e+001	247	37	1.077721e+001	0	0	0	0	0	0	175.727	1	1	54.1152	36
DATA	1687	20	72	0	0	A_42_P618185	NM_001108486	11693.9	324.104	4.264753e+003	4.264872e+002	4107	37	7.235791e+000	0	0	0	0	0	0	4086.74	1	1	46.8651	38.24
DATA	1688	20	73	0	0	A_42_P619957	NM_053830	11719.5	323.957	2.285772e+002	2.308033e+001	292	39	9.950209e+000	0	0	0	0	0	0	218.058	1	1	47.5395	39.56
DATA	1689	20	74	0	0	A_44_P375042	NM_001014243	11744.6	324.056	4.229197e+002	4.241384e+001	473	35	8.486302e+000	0	0	0	0	0	0	401.56	1	1	47.5395	36.7273
DATA	1690	20	75	0	0	A_44_P438053	NM_001004201	11770.1	323.985	1.125097e+002	1.170532e+001	181.5	35	8.216643e+000	0	0	0	0	0	0	106.277	1	1	46.8651	35.4286
DATA	1691	20	76	0	0	A_43_P19181	ENSRNOT00000018440	11795.6	324.103	1.511178e+002	1.545675e+001	217	34	1.189589e+001	0	0	0	0	0	0	141.964	1	1	46.5243	36.8125
DATA	1692	20	77	0	0	A_42_P664259	NM_024396	11821.4	324.069	5.708547e+004	5.708548e+003	53192.5	42	8.296863e+000	0	0	0	0	0	0	53308.3	1	1	53.8203	39.3
DATA	1693	20	78	0	0	A_44_P588645	FQ230244	11846.1	324.211	1.559074e+002	1.593340e+001	224	44	6.096447e+000	0	0	0	0	0	0	144.713	1	1	47.2035	43.6667
DATA	1694	20	79	0	0	A_64_P030844	XM_001065657	11872	324.139	3.136975e+001	4.559459e+000	103	39	9.501595e+000	0	0	0	0	0	0	28.9225	1	1	49.5074	40.9697
DATA	1695	20	80	0	0	A_64_P054823	A_64_P054823	11897	324.261	1.353013e+004	1.353017e+003	12224	38.5	1.085157e+001	0	0	0	0	0	0	12389.6	1	1	52.9257	38.8571
DATA	1696	20	81	0	0	A_42_P516860	XM_001059330	11922.6	324.133	9.358985e+001	9.942582e+000	158.5	38	9.644017e+000	0	0	0	0	0	0	85.0685	1	1	43.7019	38.3438
DATA	1697	20	82	0	0	A_64_P085772	NM_001191606	11948.1	324.386	1.011668e+002	1.066702e+001	169.5	35.5	8.982168e+000	0	0	0	0	0	0	91.2543	1	1	57.259	36.375
DATA	1698	20	83	66	1	DarkCorner	DarkCorner	11973.2	324.319	3.421186e+000	3.409053e+000	66	39.5	8.066932e+000	0	0	0	0	0	0	-8.23345	0	0	47.5395	38.6944
DATA	1699	20	84	66	1	DarkCorner	DarkCorner	11998.3	323.792	3.450041e+000	3.437806e+000	70	40	9.615771e+000	0	0	0	0	0	0	-6.19759	0	0	47.5395	40.0345
DATA	1700	20	85	66	1	DarkCorner	DarkCorner	12024.4	324.394	3.480759e+000	3.468416e+000	71	32	7.710498e+000	0	0	0	0	0	0	-1.87113	0	0	45.4864	32.4429
DATA	1701	21	1	66	1	DarkCorner	DarkCorner	9878.7	329.908	3.558798e+000	3.546178e+000	64	31	7.374266e+000	0	0	0	0	0	0	-4.01647	0	0	49.5074	31.6461
DATA	1702	21	2	66	1	DarkCorner	DarkCorner	9904	329.545	3.575890e+000	3.563209e+000	62	35.5	1.170148e+001	0	0	0	0	0	0	-6.68204	0	0	55.8519	37.9643
DATA	1703	21	3	66	1	DarkCorner	DarkCorner	9929.5	329.648	3.590841e+000	3.578107e+000	59	37.5	9.666051e+000	0	0	0	0	0	0	-9.02762	0	0	57.5363	36.3929
DATA	1704	21	4	0	0	A_44_P277669	NM_001163736	9954.58	329.573	5.964628e+002	5.975426e+001	573	36	9.789547e+000	0	0	0	0	0	0	506.769	1	1	57.5363	35.9091
DATA	1705	21	5	0	0	A_42_P788480	NM_019194	9980.21	330	8.656679e+003	8.656754e+002	7358	39.5	1.428624e+001	0	0	0	0	0	0	7333.27	1	1	46.8651	45.2
DATA	1706	21	6	0	0	A_42_P558354	NM_001007686	10005.6	329.973	3.510459e+003	3.510644e+002	2864	34	9.506743e+000	0	0	0	0	0	0	2966.84	1	1	48.5334	35.9667
DATA	1707	21	7	0	0	A_44_P714409	NM_001047907	10030.8	330.323	3.345797e+003	3.345993e+002	2764	35	7.217931e+000	0	0	0	0	0	0	2822.66	1	1	45.4864	33.7931
DATA	1708	21	8	0	0	A_42_P604331	NM_001108533	10056.5	329.648	9.667534e+004	9.667535e+003	80865	40	6.689544e+000	0	0	0	0	0	0	81454.5	1	1	57.5363	40
DATA	1709	21	9	0	0	A_64_P139472	NM_173119	10081.9	330.175	3.628344e+003	3.628525e+002	3026.5	34.5	6.653665e+000	0	0	0	0	0	0	3054.8	1	1	45.4864	35.2667
DATA	1710	21	10	0	0	A_42_P711589	NM_022948	10107	329.882	7.137480e+003	7.137572e+002	5912	36	6.925714e+000	0	0	0	0	0	0	6007.51	1	1	46.8651	34.4138
DATA	1711	21	11	0	0	A_42_P813567	NM_031841	10132.5	330	1.256182e+005	1.256182e+004	105530	36	9.353090e+000	0	0	0	0	0	0	105749	1	1	54.1152	37.1379
DATA	1712	21	12	0	0	A_42_P647505	TC640289	10158	330	3.678330e+003	3.678509e+002	3132	40	8.983019e+000	0	0	0	0	0	0	3098.4	1	1	54.9904	39.8065
DATA	1713	21	13	0	0	A_64_P094313	NM_032073	10183.3	330.118	7.410666e+002	7.419492e+001	692	36	8.932729e+000	0	0	0	0	0	0	624.856	1	1	48.8603	38.6429
DATA	1714	21	14	0	0	A_42_P577421	NM_001106819	10208.6	330.028	4.071794e+002	4.087792e+001	408	34	8.398748e+000	0	0	0	0	0	0	343.801	1	1	48.2044	35.4091
DATA	1715	21	15	0	0	A_42_P477311	NM_001013170	10233.9	330.2	1.322436e+004	1.322441e+003	11024.5	36.5	1.008502e+001	0	0	0	0	0	0	11185.5	1	1	46.8651	36.1786
DATA	1716	21	16	0	0	A_42_P630249	NM_031824	10259.4	330.157	2.713840e+003	2.714079e+002	2346	35	6.111646e+000	0	0	0	0	0	0	2300.25	1	1	47.5395	35.931
DATA	1717	21	17	0	0	A_42_P618256	NM_001024759	10284.9	329.943	7.517043e+002	7.525613e+001	705	33	9.434459e+000	0	0	0	0	0	0	638.68	1	1	46.8651	34.1351
DATA	1718	21	18	0	0	A_64_P101584	A_64_P101584	10310.5	330	4.767147e+002	4.780576e+001	475	37	8.004379e+000	0	0	0	0	0	0	406.139	1	1	54.1152	36.4848
DATA	1719	21	19	0	0	A_64_P045461	NM_001106750	10335.7	329.776	2.426010e+002	2.452141e+001	280	37	8.737310e+000	0	0	0	0	0	0	207.293	1	1	45.835	37.5833
DATA	1720	21	20	0	0	A_64_P056485	ENSRNOT00000033663	10361.4	330.404	2.018961e+003	2.019275e+002	1748.5	36	7.631672e+000	0	0	0	0	0	0	1730.8	1	1	57.8122	35.6364
DATA	1721	21	21	0	0	A_64_P013077	A_64_P013077	10386.5	330.352	8.753949e+001	9.445036e+000	143.5	38.5	9.208987e+000	0	0	0	0	0	0	75.3021	1	1	57.5363	37.9688
DATA	1722	21	22	0	0	A_44_P348952	NM_001000368	10411.9	330.386	1.369437e+001	3.789524e+000	79.5	36	9.267508e+000	0	0	0	0	0	0	11.8233	1	0	57.259	37.3793
DATA	1723	21	23	0	0	A_64_P147609	NM_001106295	10437.2	330.239	5.820554e+003	5.820660e+002	4943	35	1.080526e+001	0	0	0	0	0	0	5044.58	1	1	46.8651	37.1667
DATA	1724	21	24	0	0	A_44_P193928	NM_183328	10462.7	330.373	1.410925e+003	1.411361e+002	1269	35	9.509886e+000	0	0	0	0	0	0	1227.8	1	1	46.1809	38.1
DATA	1725	21	25	0	0	A_44_P441947	XM_001079870	10488.1	330.014	9.425490e+002	9.431953e+001	879	41	8.785484e+000	0	0	0	0	0	0	823.625	1	1	46.8651	40.4483
DATA	1726	21	26	0	0	A_42_P666259	NM_001009661	10513.3	329.833	1.286659e+004	1.286664e+003	11085	37	8.829569e+000	0	0	0	0	0	0	11291.3	1	1	45.835	35.8065
DATA	1727	21	27	0	0	A_64_P082486	A_64_P082486	10538.7	330.329	1.038786e+003	1.039363e+002	981.5	47.5	9.298902e+000	0	0	0	0	0	0	915.674	1	1	47.5395	45.8929
DATA	1728	21	28	0	0	A_64_P091940	NM_033237	10564.3	330.188	2.536902e+002	2.560187e+001	293	41.5	1.039841e+001	0	0	0	0	0	0	224.643	1	1	46.8651	41.1429
DATA	1729	21	29	0	0	A_64_P144899	NM_001107736	10589.6	330.506	8.436664e+002	8.443631e+001	801	36	8.573890e+000	0	0	0	0	0	0	750.512	1	1	51.7088	37.0588
DATA	1730	21	30	0	0	A_44_P410062	XM_224553	10614.7	330.662	2.679243e+002	2.700901e+001	317	36	7.793587e+000	0	0	0	0	0	0	239.445	1	1	48.5334	37.36
DATA	1731	21	31	0	0	A_42_P489764	NM_001004099	10640.5	330.5	4.721709e+003	4.721831e+002	4215	34	8.201285e+000	0	0	0	0	0	0	4240.01	1	1	49.1849	36.7586
DATA	1732	21	32	0	0	A_42_P640277	NM_001003401	10665.7	330.5	4.999794e+004	4.999795e+003	44303.5	41	8.227596e+000	0	0	0	0	0	0	45108.4	1	1	57.5363	41.12
DATA	1733	21	33	0	0	A_44_P212850	NM_019305	10691.3	330.676	5.831488e+001	6.732783e+000	122.5	33.5	6.841053e+000	0	0	0	0	0	0	52.8652	1	1	48.2044	33
DATA	1734	21	34	0	0	A_64_P125506	NM_021677	10716	330.484	2.003486e+002	2.031295e+001	261.5	32	8.504823e+000	0	0	0	0	0	0	182.462	1	1	43.7019	30.8261
DATA	1735	21	35	0	0	A_42_P802358	NM_001024341	10742.1	330.466	1.651709e+004	1.651713e+003	14530	38	6.300196e+000	0	0	0	0	0	0	15115.6	1	1	48.5334	38.3226
DATA	1736	21	36	0	0	A_44_P552852	XM_346367	10767.4	330.316	1.263646e+001	3.550502e+000	81.5	38	7.664263e+000	0	0	0	0	0	0	11.6182	1	0	49.1849	38.0313
DATA	1738	21	38	0	0	A_64_P141187	NM_001108899	10818.3	330.5	1.668145e+001	3.686507e+000	84	35.5	8.805183e+000	0	0	0	0	0	0	15.4797	1	1	65	34.7813
DATA	1739	21	39	0	0	A_44_P274823	NM_001105831	10843.6	330.746	2.828856e+003	2.829046e+002	2623	33	7.457466e+000	0	0	0	0	0	0	2636.83	1	1	47.5395	33.8
DATA	1740	21	40	0	0	A_42_P804913	ENSRNOT00000022886	10868.9	330.889	7.836391e+001	8.486853e+000	143.5	32	8.550004e+000	0	0	0	0	0	0	73.366	1	1	46.8651	34.0513
DATA	1741	21	41	0	0	A_64_P113970	NM_212501	10894.8	330.562	3.227887e+003	3.228050e+002	3180	37	7.847006e+000	0	0	0	0	0	0	3035.16	1	1	48.8603	37.963
DATA	1742	21	42	1028	1	(+)E1A_r60_3	E1A_r60_3	10919.6	330.573	3.326274e+001	4.637314e+000	99	36.5	9.789509e+000	0	0	0	0	0	0	31.4043	1	1	57.5363	36.4
DATA	1743	21	43	0	0	A_42_P661992	TC596141	10945.3	330.5	3.099115e+002	3.115777e+001	363	35.5	1.202949e+001	0	0	0	0	0	0	293.793	1	1	57.5363	37.5313
DATA	1744	21	44	0	0	A_42_P577431	NM_001109422	10970.5	330.5	1.156942e+002	1.200532e+001	180	39.5	1.089572e+001	0	0	0	0	0	0	110.1	1	1	57.5363	41.1563
DATA	1745	21	45	0	0	A_44_P524785	NM_001000184	10995.9	330.5	8.765638e+000	3.311848e+000	80.5	38	9.567364e+000	0	0	0	0	0	0	8.37292	1	0	56.9804	38.2286
DATA	1746	21	46	0	0	A_64_P027634	NM_001000223	11021	330.75	5.186083e+001	6.084713e+000	121	40	8.117244e+000	0	0	0	0	0	0	49.7124	1	1	45.4864	38.8
DATA	1747	21	47	0	0	A_42_P492976	NM_001126099	11046.8	330.671	3.071301e+002	3.087634e+001	365	38	7.871019e+000	0	0	0	0	0	0	295.416	1	1	48.2044	37.6
DATA	1748	21	48	0	0	A_64_P157479	AABR03127998	11072.1	330.662	7.444793e+003	7.444860e+002	7129.5	36	8.835645e+000	0	0	0	0	0	0	7183.63	1	1	45.4864	37.1471
DATA	1749	21	49	0	0	A_44_P391706	NM_001007796	11097.5	330.5	2.304736e+002	2.326193e+001	293.5	42	8.872524e+000	0	0	0	0	0	0	223.049	1	1	46.5243	43.3103
DATA	1750	21	50	0	0	A_44_P184685	NM_001007735	11122.6	330.928	1.279827e+002	1.317866e+001	196.5	38	7.452740e+000	0	0	0	0	0	0	124.203	1	1	46.5243	37.72
DATA	1751	21	51	0	0	A_44_P475275	NM_001000893	11148.4	330.573	7.257035e+001	7.905425e+000	142	37.5	9.635967e+000	0	0	0	0	0	0	70.6073	1	1	57.5363	37.5
DATA	1752	21	52	0	0	A_44_P270056	NM_001007800	11173.5	331.265	1.605574e+002	1.635764e+001	223.5	34	9.837135e+000	0	0	0	0	0	0	156.578	1	1	46.5243	37
DATA	1753	21	53	0	0	A_64_P059351	NM_001145175	11199.1	330.614	1.327515e+002	1.363728e+001	202	37	9.561571e+000	0	0	0	0	0	0	129.725	1	1	57.259	37.069
DATA	1754	21	54	0	0	A_42_P573441	NM_001105742	11224.4	330.972	8.715245e+003	8.715301e+002	8395	40	8.704096e+000	0	0	0	0	0	0	8532.17	1	1	48.2044	41.1935
DATA	1755	21	55	0	0	A_42_P485589	NM_017246	11249.8	331.078	1.337679e+002	1.373385e+001	204	38.5	6.952529e+000	0	0	0	0	0	0	131.162	1	1	45.4864	37.3636
DATA	1756	21	56	0	0	A_44_P149540	XM_223051	11275.2	330.897	1.618423e+004	1.618426e+003	15639	36	6.607765e+000	0	0	0	0	0	0	15889.1	1	1	46.5243	35.6552
DATA	1757	21	57	0	0	A_44_P323236	NM_001000513	11300.5	331	2.159672e+001	3.781548e+000	92	41	1.104219e+001	0	0	0	0	0	0	21.2243	1	1	54.1152	40.6786
DATA	1759	21	59	0	0	A_64_P100447	NM_001173469	11351.5	331	1.713177e+001	3.542405e+000	88	34	1.055387e+001	0	0	0	0	0	0	16.8559	1	1	54.1152	34.7931
DATA	1760	21	60	0	0	A_64_P150008	A_64_P150008	11376.6	331.028	9.181793e+001	9.691049e+000	160	35	9.048956e+000	0	0	0	0	0	0	90.3512	1	1	48.2044	36.5714
DATA	1761	21	61	0	0	A_42_P481696	NM_022508	11402.4	330.894	2.503715e+003	2.503907e+002	2517	37.5	1.128539e+001	0	0	0	0	0	0	2463.26	1	1	45.4864	38
DATA	1762	21	62	0	0	A_64_P033755	AABR03073220	11427.4	331.154	6.457122e+001	7.163650e+000	136	38	8.855854e+000	0	0	0	0	0	0	63.4989	1	1	45.4864	38.1154
DATA	1763	21	63	0	0	A_64_P115980	NM_001109458	11452.7	331.12	2.244546e+002	2.265916e+001	295.5	38	8.080252e+000	0	0	0	0	0	0	220.551	1	1	48.8603	37.9048
DATA	1764	21	64	0	0	A_64_P001426	NM_001126301	11478.5	331.352	1.813177e+002	1.839624e+001	250.5	37	9.789615e+000	0	0	0	0	0	0	177.965	1	1	57.5363	37.6452
DATA	1765	21	65	0	0	A_64_P012987	NM_001108668	11504	331.208	2.099204e+003	2.099435e+002	2098.5	35	1.043702e+001	0	0	0	0	0	0	2057.35	1	1	49.1849	39.8125
DATA	1767	21	67	0	0	A_42_P668289	TC585832	11554.6	331.167	1.903209e+003	1.903465e+002	1904.5	27.5	6.626067e+000	0	0	0	1	1	0	1858.02	1	1	47.8731	27.1429
DATA	1768	21	68	0	0	A_64_P052690	ENSRNOT00000036634	11580.2	331.071	3.392304e+002	3.406738e+001	390	27	4.878772e+000	0	0	0	0	1	0	330.349	1	1	46.5243	26.0625
DATA	1769	21	69	0	0	A_42_P593020	NM_013413	11605.4	331.427	1.730427e+002	1.758709e+001	195	33	1.393473e+001	0	0	0	1	0	0	168.05	1	1	57.5363	35.52
DATA	1770	21	70	0	0	A_64_P037303	NM_001127530	11630.8	331.246	8.529498e+002	8.535317e+001	931	43.5	1.964480e+001	0	0	0	0	1	0	825.715	1	1	45.835	51.2188
DATA	1771	21	71	0	0	A_44_P684180	NM_001037363	11656.2	331.373	7.454129e+003	7.454196e+002	7142	38	1.097790e+001	0	0	0	0	0	0	7191.03	1	1	45.835	40.7143
DATA	1772	21	72	0	0	A_64_P104743	NM_133518	11681.5	331.352	2.774808e+002	2.792908e+001	328	41	8.957006e+000	0	0	0	0	0	0	266.659	1	1	57.5363	38.8065
DATA	1773	21	73	0	0	A_44_P941132	NM_001108128	11707	330.855	7.094750e+003	7.094822e+002	6852	40	9.860956e+000	0	0	0	0	0	0	6788.87	1	1	45.4864	40.9615
DATA	1774	21	74	0	0	A_44_P187080	NM_001110823	11732.3	331.313	2.421087e+004	2.421089e+003	22283	39	1.005296e+001	0	0	0	0	0	0	23063.1	1	1	46.1809	38.8095
DATA	1775	21	75	0	0	A_42_P574960	ENSRNOT00000068719	11757.5	331.125	9.598756e+002	9.604150e+001	974.5	34	7.018343e+000	0	0	0	0	0	0	909.891	1	1	44.0646	34.4286
DATA	1776	21	76	0	0	A_64_P094850	A_64_P094850	11782.8	331.136	6.912949e+001	7.632526e+000	143	33	9.430996e+000	0	0	0	0	0	0	65.1859	1	1	45.835	33.7667
DATA	1777	21	77	0	0	A_43_P13418	NM_172042	11808.4	331.433	8.049339e+003	8.049405e+002	7574	36	9.359013e+000	0	0	0	0	0	0	7547.32	1	1	46.1809	38.3448
DATA	1778	21	78	66	-1	(-)3xSLv1	NegativeControl	11833.7	331.5	3.284706e+000	3.273057e+000	68	44.5	7.212809e+000	0	0	0	0	0	0	-6.66417	0	0	65	42.7692
DATA	1779	21	79	0	0	A_44_P321594	ENSRNOT00000006966	11858.9	331.243	3.810299e+001	5.036736e+000	108	41.5	9.806231e+000	0	0	0	0	0	0	35.2883	1	1	46.5243	42
DATA	1780	21	80	0	0	A_44_P792531	NM_001025700	11884.4	331.507	2.721915e+002	2.742042e+001	327.5	38.5	9.334139e+000	0	0	0	0	0	0	250.396	1	1	47.8731	39.6154
DATA	1781	21	81	0	0	A_43_P14795	NM_001044248	11909.8	331.183	1.265938e+003	1.266378e+002	1214	37	1.008887e+001	0	0	0	0	0	0	1156.3	1	1	47.2035	38.2162
DATA	1782	21	82	0	0	A_42_P671502	NM_053467	11935.3	331.382	7.298303e+003	7.298381e+002	6601	33	7.025850e+000	0	0	0	0	0	0	6616.63	1	1	46.5243	31.1579
DATA	1783	21	83	66	1	DarkCorner	DarkCorner	11960.4	331.392	3.403051e+000	3.390983e+000	72	39	7.731804e+000	0	0	0	0	0	0	-4.67061	0	0	48.8603	39.2917
DATA	1784	21	84	66	1	DarkCorner	DarkCorner	11985.8	331.258	3.431104e+000	3.418937e+000	65	38	9.070530e+000	0	0	0	0	0	0	-8.97781	0	0	45.835	37.7059
DATA	1785	21	85	66	1	DarkCorner	DarkCorner	12011	331.54	3.460001e+000	3.447731e+000	73	34	9.073606e+000	0	0	0	0	0	0	-3.88546	0	0	44.0646	35.0541
DATA	1786	22	1	66	1	DarkCorner	DarkCorner	9891.19	336.887	3.567655e+000	3.555004e+000	61.5	34	8.059005e+000	0	0	0	0	0	0	-5.79585	0	0	49.5074	35.0488
DATA	1787	22	2	66	1	DarkCorner	DarkCorner	9916.5	337	3.583537e+000	3.570829e+000	58	40	8.548171e+000	0	0	0	0	0	0	-9.56885	0	0	54.1152	37.9259
DATA	1788	22	3	66	1	DarkCorner	DarkCorner	9942.03	336.954	3.597301e+000	3.584544e+000	56	36	8.619593e+000	0	0	0	0	0	0	-12.5968	0	0	46.8651	35.6563
DATA	1789	22	4	0	0	A_42_P704824	NM_001009640	9967.47	337.303	1.988735e+002	2.020985e+001	233	35	1.190509e+001	0	0	0	0	0	0	168.712	1	1	49.1849	38.2581
DATA	1790	22	5	0	0	A_42_P517554	NM_001107060	9992.91	337.386	1.488730e+002	1.531766e+001	192.5	37	1.322425e+001	0	0	0	0	0	0	125.966	1	1	57.259	41.5455
DATA	1791	22	6	0	0	A_42_P586883	NM_001106416	10018.2	337.58	3.636395e+001	5.125932e+000	99	36	7.559289e+000	0	0	0	0	0	0	30.7064	1	1	50.7771	35
DATA	1792	22	7	0	0	A_64_P060302	BF559343	10043.6	337.427	2.853152e+002	2.876002e+001	312.5	37	9.979980e+000	0	0	0	0	0	0	240.563	1	1	57.5363	39
DATA	1793	22	8	0	0	A_64_P055418	NM_001025641	10068.5	337.83	2.043161e+001	4.158249e+000	85.5	39	5.869277e+000	0	0	0	0	0	0	17.2102	1	1	39.0882	39.1786
DATA	1794	22	9	0	0	A_44_P317600	NM_012612	10094.5	337.309	4.534279e+002	4.548735e+001	443	35.5	6.654101e+000	0	0	0	0	0	0	381.736	1	1	46.8651	34.9091
DATA	1795	22	10	0	0	A_44_P433359	NM_022710	10119.9	337.386	3.298557e+002	3.318401e+001	345.5	34	7.973888e+000	0	0	0	0	0	0	277.693	1	1	65	34.4118
DATA	1796	22	11	0	0	A_42_P788480	NM_019194	10145.2	337.239	8.888232e+003	8.888306e+002	7375	37	8.055554e+000	0	0	0	0	0	0	7485.66	1	1	46.8651	38.2667
DATA	1797	22	12	0	0	A_44_P269808	NM_001025281	10170.6	337.427	7.201067e+001	8.059427e+000	130	39.5	1.263631e+001	0	0	0	0	0	0	60.6975	1	1	57.5363	40.4688
DATA	1798	22	13	0	0	A_64_P108165	NM_001108889	10196.1	337.477	2.714897e+001	4.520807e+000	90.5	38	1.395950e+001	0	0	0	0	0	0	22.9117	1	1	55.8519	43.1429
DATA	1799	22	14	0	0	A_42_P581567	NM_001011899	10221.4	337.427	1.727215e+002	1.764519e+001	208.5	34	7.607790e+000	0	0	0	0	0	0	145.995	1	1	57.5363	34.0385
DATA	1800	22	15	0	0	A_42_P746029	NM_144748	10246.7	337.5	3.345404e+001	4.916032e+000	95	37	6.751596e+000	0	0	0	0	0	0	28.332	1	1	57.5363	35.7407
DATA	1801	22	16	0	0	A_42_P481087	XM_232226	10272.3	337.778	8.805315e+002	8.812647e+001	810	34.5	8.710394e+000	0	0	0	0	0	0	747.425	1	1	47.5395	36.75
DATA	1802	22	17	0	0	A_64_P031020	ENSRNOT00000032728	10297.5	337.475	4.327668e+000	3.610846e+000	72	37	8.551759e+000	0	0	0	0	0	0	3.68281	1	0	43.7019	36.8485
DATA	1803	22	18	0	0	A_44_P344228	NM_183051	10323.1	337.5	2.866737e+001	4.582090e+000	96	37.5	9.593980e+000	0	0	0	0	0	0	24.4658	1	1	56.9804	37.1111
DATA	1804	22	19	0	0	A_64_P009798	NM_021742	10348.5	337.5	3.576126e+000	3.569116e+000	73	38	7.094194e+000	0	0	0	0	0	0	1.72187	0	0	57.5363	36.5517
DATA	1805	22	20	0	0	A_44_P775747	ENSRNOT00000051510	10373.8	337.75	2.245967e+004	2.245970e+003	19322.5	38.5	9.081935e+000	0	0	0	0	0	0	19292.1	1	1	45.1352	37.1923
DATA	1806	22	21	0	0	A_44_P349475	NM_031333	10399.2	337.773	8.577962e+002	8.585259e+001	777	40	9.725485e+000	0	0	0	0	0	0	739.46	1	1	45.4864	40.6333
DATA	1807	22	22	0	0	A_64_P114198	NM_001080153	10424.7	337.944	2.322764e+003	2.323032e+002	2065	37.5	9.523331e+000	0	0	0	0	0	0	2009.93	1	1	48.5334	39.5417
DATA	1808	22	23	0	0	A_42_P719060	NM_001108994	10450	337.545	3.390235e+003	3.390417e+002	2880.5	35	1.060149e+001	0	0	0	0	0	0	2945.16	1	1	55.8519	36.9655
DATA	1809	22	24	0	0	A_44_P163243	NM_175759	10475.5	337.5	1.364743e+001	3.754063e+000	79	37	9.742877e+000	0	0	0	0	0	0	11.9048	1	0	57.5363	38.931
DATA	1810	22	25	0	0	A_44_P156864	A_44_P156864	10500.2	337.492	9.419251e+001	1.004250e+001	149	37	9.493578e+000	0	0	0	0	0	0	82.5063	1	1	43.7019	37.5313
DATA	1811	22	26	0	0	A_42_P758052	NM_001031645	10526.3	337.493	4.531940e+003	4.532072e+002	3919	40	1.003828e+001	0	0	0	0	0	0	3987.55	1	1	46.8651	39.7273
DATA	1812	22	27	0	0	A_44_P280659	NM_001100971	10551.5	337.5	7.331010e+001	8.102980e+000	134.5	42	1.173633e+001	0	0	0	0	0	0	64.7914	1	1	57.5363	41.2069
DATA	1813	22	28	0	0	A_42_P768380	NM_001100158	10577.1	337.768	6.387009e+003	6.387102e+002	5586	36	7.908794e+000	0	0	0	0	0	0	5670.94	1	1	46.5243	36.2353
DATA	1814	22	29	0	0	A_44_P486312	NM_144737	10602.3	337.9	3.572560e+002	3.588893e+001	383	36.5	9.965247e+000	0	0	0	0	0	0	318.671	1	1	47.2035	38.1154
DATA	1815	22	30	0	0	A_64_P005288	XM_575125	10627.4	338.167	3.625597e+002	3.641543e+001	392	34	4.816638e+000	0	0	0	0	0	0	324.911	1	1	46.1809	34.6
DATA	1816	22	31	0	0	A_64_P101885	ENSRNOT00000058341	10653.4	337.573	2.736825e+002	2.757714e+001	311	37.5	6.699254e+000	0	0	0	0	0	0	246.445	1	1	65	37
DATA	1817	22	32	0	0	A_64_P113645	ENSRNOT00000055538	10678.5	337.648	3.383959e+000	3.376555e+000	71	37	8.985210e+000	0	0	0	0	0	0	1.5933	0	0	57.5363	37.6552
DATA	1818	22	33	0	0	A_42_P588869	NM_001008348	10704.2	337.829	3.226746e+003	3.226920e+002	2994.5	33.5	5.990330e+000	0	0	0	0	0	0	2933.35	1	1	46.8651	32.8333
DATA	1819	22	34	0	0	A_64_P028027	NM_001000473	10729.4	337.573	4.165705e+001	5.339392e+000	107.5	34	8.570197e+000	0	0	0	0	0	0	38.0476	1	1	57.5363	33.6552
DATA	1820	22	35	0	0	A_42_P468805	NM_145721	10754.6	337.573	3.945845e+002	3.959826e+001	437	39	7.568245e+000	0	0	0	0	0	0	362.08	1	1	57.5363	37.7241
DATA	1821	22	36	0	0	A_42_P522194	NM_012914	10779.9	338.175	1.342103e+002	1.382292e+001	192	34.5	8.875256e+000	0	0	0	0	0	0	123.733	1	1	45.4864	35.5625
DATA	1822	22	37	0	0	A_64_P002969	A_64_P002969	10805.5	337.648	9.792883e+000	3.436253e+000	76	34.5	8.715716e+000	0	0	0	0	0	0	9.0701	1	0	57.5363	33.6875
DATA	1823	22	38	0	0	A_42_P453935	NM_001198580	10830.9	338.328	4.435831e+003	4.435953e+002	4251.5	38	7.499677e+000	0	0	0	0	0	0	4127.27	1	1	45.1352	36.3871
DATA	1824	22	39	0	0	A_42_P523551	NM_001014087	10855.8	338.315	3.276062e+000	3.266636e+000	70	34.5	6.938018e+000	0	0	0	0	0	0	1.11793	0	0	47.2035	34.8438
DATA	1825	22	40	0	0	A_64_P046076	NM_053952	10881.7	338.015	1.889565e+003	1.889845e+002	1782	36	8.306624e+000	0	0	0	0	0	0	1773.63	1	1	46.1809	37
DATA	1826	22	41	0	0	A_42_P607770	NM_001134616	10907	337.797	9.260741e+003	9.260797e+002	8712	37.5	8.974980e+000	0	0	0	0	0	0	8729.06	1	1	46.8651	38.4286
DATA	1827	22	42	0	0	A_64_P089400	NM_022605	10932.6	337.929	2.517466e+002	2.538015e+001	304.5	34	1.000344e+001	0	0	0	0	0	0	238.279	1	1	47.2035	35.0714
DATA	1828	22	43	0	0	A_64_P072064	FQ221714	10957.5	338	1.054828e+005	1.054828e+004	100770	39	1.361407e+001	0	0	0	0	0	0	100229	1	1	54.1152	40.697
DATA	1829	22	44	0	0	A_42_P555125	NM_012913	10983.1	337.9	9.465288e+003	9.465342e+002	8893	38	1.007435e+001	0	0	0	0	0	0	9028.46	1	1	46.8651	39.2973
DATA	1830	22	45	0	0	A_42_P768776	NM_001108443	11008.6	338	5.751715e+003	5.751803e+002	5489	39	8.066228e+000	0	0	0	0	0	0	5506.44	1	1	46.5243	38.7241
DATA	1831	22	46	0	0	A_42_P593930	NM_001195606	11034	338	8.818538e+000	3.295680e+000	79.5	40	7.832597e+000	0	0	0	0	0	0	8.47182	1	0	54.9904	38.0571
DATA	1832	22	47	0	0	A_64_P013545	NM_001115046	11059.3	338.1	2.304380e+002	2.326015e+001	290	40	4.848699e+000	0	0	0	0	0	0	222.105	1	1	47.2035	38.6522
DATA	1833	22	48	0	0	A_42_P548520	NM_001100834	11084.8	338	4.555591e+003	4.555700e+002	4364	41.5	8.397224e+000	0	0	0	0	0	0	4404.47	1	1	46.8651	42.1765
DATA	1834	22	49	0	0	A_42_P692317	NM_001107565	11110.2	337.97	9.339236e+002	9.344535e+001	957	41	9.677043e+000	0	0	0	0	0	0	905.544	1	1	46.1809	41.6129
DATA	1835	22	50	0	0	A_64_P078303	NM_001106526	11135.3	337.875	3.486522e+001	4.690737e+000	106	39	8.203087e+000	0	0	0	0	0	0	33.8945	1	1	45.4864	40.1724
DATA	1836	22	51	0	0	A_64_P031771	A_64_P031771	11160.9	338.386	3.632158e+001	4.794875e+000	109	36.5	1.071634e+001	0	0	0	0	0	0	35.3984	1	1	57.259	38.8929
DATA	1837	22	52	0	0	A_44_P393929	NM_001039713	11186.2	338.211	9.511374e+001	1.001109e+001	164	36	1.034013e+001	0	0	0	0	0	0	92.898	1	1	47.5395	37.4194
DATA	1838	22	53	0	0	A_44_P135730	XM_228802	11211.5	338.211	1.729098e+002	1.756974e+001	238.5	40	9.941585e+000	0	0	0	0	0	0	169.211	1	1	49.8279	40.2059
DATA	1839	22	54	0	0	A_43_P23215	NM_001025737	11237.1	338.397	2.580161e+002	2.598860e+001	322.5	40	1.212750e+001	0	0	0	0	0	0	252.931	1	1	48.5334	42.1724
DATA	1840	22	55	0	0	A_64_P118427	A_64_P118427	11262.5	338.352	8.635595e+001	9.177712e+000	153	37	5.371922e+000	0	0	0	0	0	0	84.7747	1	1	57.5363	36.3704
DATA	1841	22	56	0	0	A_64_P075560	NM_001037526	11287.9	338.386	2.727959e+001	4.132345e+000	97	35	7.554675e+000	0	0	0	0	0	0	26.8112	1	1	57.259	35.8387
DATA	1842	22	57	0	0	A_64_P150311	NM_177935	11312.9	337.778	4.533945e+001	5.493212e+000	118.5	37	9.447670e+000	0	0	0	0	0	0	44.5975	1	1	45.4864	39.1176
DATA	1843	22	58	0	0	A_44_P272393	NM_001106892	11338.9	338.158	5.201249e+001	6.054712e+000	124	35	1.140392e+001	0	0	0	0	0	0	51.1937	1	1	47.8731	35.871
DATA	1844	22	59	0	0	A_44_P421887	NM_001191565	11364.1	338.5	2.332815e+002	2.353302e+001	304.5	35	1.167732e+001	0	0	0	0	0	0	229.682	1	1	56.9804	37.2857
DATA	1845	22	60	0	0	A_64_P045102	A_64_P045102	11389.4	338.356	5.924339e+002	5.932437e+001	696.5	38	1.042189e+001	0	0	0	0	0	0	583.285	1	1	42.5954	38.4828
DATA	1846	22	61	0	0	A_42_P818546	NM_001191600	11414.9	338.299	7.809205e+002	7.815354e+001	849	37	9.564893e+000	0	0	0	0	0	0	768.617	1	1	45.835	36.5556
DATA	1847	22	62	0	0	A_42_P777445	ENSRNOT00000012684	11440.3	338.297	6.096090e+001	6.839676e+000	134	41	1.070436e+001	0	0	0	0	0	0	59.9629	1	1	48.5334	40.6
DATA	1848	22	63	0	0	A_64_P111709	NM_001000554	11465.6	338.427	1.883587e+002	1.908996e+001	259	38	8.616690e+000	0	0	0	0	0	0	185.103	1	1	57.5363	37.6071
DATA	1849	22	64	0	0	A_64_P107509	NM_001191874	11491.1	338.5	7.817670e+001	8.412916e+000	146.5	35.5	8.250637e+000	0	0	0	0	0	0	76.7282	1	1	65	36.6111
DATA	1850	22	65	0	0	A_64_P121836	ENSRNOT00000007828	11516.5	338.5	1.927736e+002	1.952712e+001	198	40.5	3.726122e+001	0	0	1	0	1	0	188.9	1	1	57.5363	53.2727
DATA	1851	22	66	0	0	A_42_P684281	XR_008784	11541.7	338.778	2.613119e+003	2.613305e+002	2589	29	7.705409e+000	0	0	0	0	1	0	2555.77	1	1	47.5395	28.96
DATA	1852	22	67	0	0	A_64_P060804	ENSRNOT00000000462	11567.3	338.575	6.294560e+001	7.028173e+000	135	27.5	4.731754e+000	0	0	0	0	1	0	61.4226	1	1	51.0895	26.2917
DATA	1853	22	68	0	0	A_64_P075675	A_64_P075675	11592.3	338.39	1.490623e+002	1.523221e+001	203	29	5.231631e+000	0	0	0	0	1	0	145.08	1	1	49.8279	28.2813
DATA	1854	22	69	0	0	A_44_P254973	NM_198051	11618	338.545	9.009126e+001	9.541865e+000	160	37.5	1.882568e+001	0	0	0	0	0	0	87.4248	1	1	55.8519	41.7778
DATA	1855	22	70	0	0	A_42_P492976	NM_001126099	11643.9	338.542	3.135576e+002	3.151402e+001	368	38	1.376856e+001	0	0	0	0	0	0	303.255	1	1	47.8731	41.1304
DATA	1856	22	71	0	0	A_42_P619114	NM_001014204	11668.7	338.5	1.048722e+002	1.095457e+001	172	40	1.145644e+001	0	0	0	1	0	0	101.065	1	1	57.5363	39.8
DATA	1857	22	72	0	0	A_42_P541625	NM_001126090	11694.3	338.5	2.663601e+004	2.663603e+003	25905.5	42	8.639380e+000	0	0	0	0	0	0	25565.3	1	1	57.5363	43.75
DATA	1858	22	73	0	0	A_42_P469136	NM_001044288	11719.6	338.573	1.126161e+003	1.126614e+002	1134	38	8.975433e+000	0	0	0	0	0	0	1076.23	1	1	57.5363	38.5926
DATA	1859	22	74	0	0	A_64_P101480	ENSRNOT00000034261	11745	338.545	6.212545e+001	6.991608e+000	133	39	9.491395e+000	0	0	0	0	0	0	59.0909	1	1	55.8519	38.9091
DATA	1860	22	75	0	0	A_64_P078554	ENSRNOT00000020079	11770	338.921	2.953139e+002	2.970677e+001	355.5	35	7.633916e+000	0	0	0	0	0	0	279.504	1	1	45.4864	37.12
DATA	1861	22	76	0	0	A_44_P131067	ENSRNOT00000045483	11795.6	338.662	1.710659e+001	3.664776e+000	89	37	8.741935e+000	0	0	0	0	0	0	16.1018	1	1	48.5334	37.25
DATA	1862	22	77	0	0	A_64_P055699	ENSRNOT00000010871	11821.4	338.573	1.349646e+003	1.350040e+002	1325	43	5.700000e+000	0	0	0	0	0	0	1262.9	1	1	57.5363	42.36
DATA	1863	22	78	0	0	A_64_P117203	NM_001106002	11846.5	339.071	1.604381e+004	1.604385e+003	14982.5	43.5	7.990922e+000	0	0	0	0	0	0	14922.8	1	1	47.8731	42.875
DATA	1864	22	79	0	0	A_44_P357870	NM_031559	11871.6	339.087	4.231198e+002	4.244055e+001	464.5	39	9.208575e+000	0	0	0	0	0	0	391.034	1	1	46.8651	40.2581
DATA	1865	22	80	0	0	A_42_P732101	NM_022624	11897.3	338.849	7.465514e+003	7.465588e+002	6701.5	39	9.756985e+000	0	0	0	0	0	0	6851.38	1	1	48.2044	40.2059
DATA	1866	22	81	0	0	A_64_P155054	XM_001062835	11922.9	338.986	6.068108e+001	6.930625e+000	128	36	1.059842e+001	0	0	0	0	0	0	55.2856	1	1	46.8651	37.4667
DATA	1867	22	82	0	0	A_44_P534154	NM_001108852	11948.1	338.614	7.680808e+001	8.389153e+000	146	37.5	7.096803e+000	0	0	0	0	0	0	69.4497	1	1	57.259	36.2692
DATA	1868	22	83	66	1	DarkCorner	DarkCorner	11973.4	338.507	3.412897e+000	3.400794e+000	65	37	8.613656e+000	0	0	0	0	0	0	-9.36671	0	0	49.1849	37.5152
DATA	1869	22	84	66	1	DarkCorner	DarkCorner	11998.6	338.596	3.441067e+000	3.428864e+000	67	35	9.078204e+000	0	0	0	0	0	0	-7.04271	0	0	57.8122	36
DATA	1870	22	85	66	1	DarkCorner	DarkCorner	12024.6	338.74	3.471587e+000	3.460031e+000	75	31	7.113430e+000	0	0	0	0	0	0	0.637077	0	0	48.5334	31.0571
DATA	1871	23	1	66	1	DarkCorner	DarkCorner	9878.73	344.628	3.559132e+000	3.546511e+000	62	32	8.601786e+000	0	0	0	0	0	0	-6.07626	0	0	52.0157	32.9391
DATA	1872	23	2	66	1	DarkCorner	DarkCorner	9904.08	344.341	3.576045e+000	3.563364e+000	59.5	36.5	7.570936e+000	0	0	0	0	0	0	-7.36007	0	0	52.0157	35.8824
DATA	1873	23	3	66	1	DarkCorner	DarkCorner	9929.28	344.704	3.590616e+000	3.577883e+000	59	40	8.380469e+000	0	0	0	0	0	0	-7.72942	0	0	47.5395	38.9677
DATA	1874	23	4	0	0	A_44_P246268	NM_001106862	9954.65	344.97	1.706634e+001	3.975290e+000	84	37	1.037927e+001	0	0	0	0	0	0	14.5011	1	0	45.4864	38.6667
DATA	1875	23	5	0	0	A_64_P028396	ENSRNOT00000051835	9979.95	344.644	2.587453e+001	4.433884e+000	89	37	1.273182e+001	0	0	0	0	0	0	21.9225	1	1	48.8603	43.1071
DATA	1876	23	6	0	0	A_64_P020451	XM_219275	10005.4	345.154	3.210660e+001	4.830375e+000	96.5	34.5	7.796320e+000	0	0	0	0	0	0	27.1401	1	1	44.7812	34.5
DATA	1878	23	8	0	0	A_64_P106264	ENSRNOT00000029671	10056.1	345.048	9.887499e+002	9.894122e+001	897	42	8.590524e+000	0	0	0	0	0	0	833.331	1	1	45.4864	42.8333
DATA	1879	23	9	0	0	A_44_P524805	NM_214832	10081.8	344.759	2.227196e+001	4.252214e+000	84.5	37	5.982882e+000	0	0	0	0	0	0	18.7572	1	1	50.1463	36.7778
DATA	1880	23	10	0	0	A_42_P764228	NM_031707	10107.1	344.471	4.827753e+003	4.827888e+002	4118.5	36.5	5.990486e+000	0	0	0	0	0	0	4064.87	1	1	47.8731	36.5882
DATA	1881	23	11	0	0	A_44_P533760	NM_182843	10132.6	344.324	1.215016e+003	1.215556e+002	1065	37	9.221014e+000	0	0	0	0	0	0	1023.23	1	1	48.2044	37.2069
DATA	1882	23	12	0	0	A_42_P524610	NM_001108992	10157.9	344.614	2.296737e+003	2.297023e+002	1960.5	36	9.681222e+000	0	0	0	0	0	0	1935.44	1	1	47.2035	36.7429
DATA	1883	23	13	0	0	A_42_P570756	NM_134345	10183.4	344.573	1.382943e+005	1.382943e+004	116539	42	1.245394e+001	0	0	0	0	0	0	116661	1	1	57.5363	45.2857
DATA	1884	23	14	0	0	A_44_P362969	NM_053688	10208.6	344.573	6.093083e+001	7.082871e+000	118	36	7.861700e+000	0	0	0	0	0	0	51.4716	1	1	57.5363	36.4783
DATA	1885	23	15	0	0	A_44_P308197	NM_001012190	10233.9	344.896	3.420285e+003	3.420475e+002	2909	34	6.959638e+000	0	0	0	0	0	0	2894.46	1	1	46.8651	33.3548
DATA	1886	23	16	0	1	ETG05_36762	ETG05_36762	10259.3	345.016	5.821755e+001	6.843465e+000	118	37	9.213436e+000	0	0	0	0	0	0	49.3716	1	1	45.1352	36.6286
DATA	1887	23	17	0	0	A_42_P744033	NM_001100846	10285	344.545	3.095665e+002	3.116394e+001	327	42	9.566181e+000	0	0	0	0	0	0	263.17	1	1	55.8519	41.3871
DATA	1888	23	18	0	0	A_42_P726363	NM_031536	10310	344.853	2.470856e+001	4.348948e+000	89	37	9.197014e+000	0	0	0	0	0	0	21.0618	1	1	46.8651	35.9667
DATA	1889	23	19	0	0	A_64_P010393	NM_053363	10335.5	344.5	4.464548e+003	4.464690e+002	3796	38.5	8.835894e+000	0	0	0	0	0	0	3817.03	1	1	52.9257	38.6111
DATA	1890	23	20	0	0	A_42_P612220	NM_001191711	10361.4	344.596	1.077330e+003	1.077917e+002	968.5	39	1.065575e+001	0	0	0	0	0	0	924.129	1	1	57.8122	39.2857
DATA	1891	23	21	0	0	A_44_P393551	NM_012567	10386.6	345.028	3.237721e+004	3.237723e+003	26912	40	9.446766e+000	0	0	0	0	0	0	27869.5	1	1	48.2044	39.7931
DATA	1892	23	22	0	0	A_44_P278688	NM_053682	10411.8	344.942	1.802791e+003	1.803136e+002	1618	39	8.858894e+000	0	0	0	0	0	0	1557.47	1	1	46.5243	40
DATA	1893	23	23	0	0	A_44_P186989	NM_001000076	10437.4	344.573	1.461862e+001	3.809135e+000	80	35	1.363593e+001	0	0	0	0	0	0	12.6786	1	0	57.5363	40.5385
DATA	1894	23	24	0	0	A_42_P640277	NM_001003401	10462.5	344.648	5.026286e+004	5.026287e+003	42950.5	41.5	1.121908e+001	0	0	0	0	0	0	43767	1	1	57.5363	42.1667
DATA	1895	23	25	0	0	A_44_P398792	NM_053867	10487.9	344.974	9.082102e+003	9.082169e+002	8173	40	9.744508e+000	0	0	0	0	0	0	7941.76	1	1	48.5334	38.1176
DATA	1896	23	26	0	0	A_64_P052552	ENSRNOT00000056797	10513.4	344.958	1.499329e+002	1.539041e+001	201	38	9.038533e+000	0	0	0	0	0	0	131.676	1	1	48.2044	38.8485
DATA	1897	23	27	0	0	A_64_P119254	NM_001013202	10538.6	344.931	3.470646e+000	3.460544e+000	69.5	38	1.039354e+001	0	0	0	0	0	0	1.0896	0	0	53.8203	38.1111
DATA	1898	23	28	0	0	A_64_P159614	NM_053614	10564.4	344.866	3.992488e+003	3.992636e+002	3590	36	1.065989e+001	0	0	0	0	0	0	3538.06	1	1	45.835	37.5667
DATA	1899	23	29	0	0	A_42_P814107	NM_001024750	10590.3	344.957	1.503929e+002	1.542464e+001	205.5	37	9.307174e+000	0	0	0	0	0	0	133.904	1	1	46.5243	37.4615
DATA	1900	23	30	0	0	A_64_P150751	NM_212494	10615.2	345.044	5.775976e+002	5.786037e+001	566	34	7.881431e+000	0	0	0	0	0	0	516.641	1	1	46.5243	34.6842
DATA	1902	23	32	0	0	A_44_P838888	ENSRNOT00000038829	10665.4	345.328	6.410782e+001	7.246687e+000	129	37	6.987370e+000	0	0	0	0	0	0	57.8816	1	1	45.1352	36.36
DATA	1903	23	33	0	0	A_43_P12927	NM_053769	10691.3	344.971	2.171146e+002	2.197030e+001	265	34.5	8.963271e+000	0	0	0	0	0	0	196.977	1	1	46.1809	35.0667
DATA	1904	23	34	0	0	A_64_P140806	A_64_P140806	10716.6	344.862	2.580984e+004	2.580986e+003	23338	34	9.833903e+000	0	0	0	0	0	0	23527	1	1	45.4864	35.4375
DATA	1905	23	35	0	0	A_42_P607026	NM_001106839	10742.1	344.778	6.225863e+003	6.225952e+002	5428	41	1.008789e+001	0	0	0	0	0	0	5702.1	1	1	45.4864	38.9677
DATA	1906	23	36	0	0	A_44_P272186	NM_001107950	10767.1	345.543	2.422366e+001	4.106011e+000	93	37	7.007988e+000	0	0	0	0	0	0	22.2897	1	1	47.5395	35.7188
DATA	1907	23	37	0	0	A_44_P226658	NM_017046	10792.4	345.3	3.514470e+001	4.821019e+000	102	32.5	1.092840e+001	0	0	0	0	0	0	32.4881	1	1	47.2035	34.8667
DATA	1908	23	38	0	0	A_64_P119279	NM_001108109	10818.1	345.265	1.615707e+004	1.615710e+003	15260	36	7.207293e+000	0	0	0	0	0	0	15005	1	1	45.835	36.1515
DATA	1909	23	39	0	0	A_44_P1042876	NM_212504	10843.6	345.479	1.471963e+003	1.472326e+002	1422	36.5	7.327084e+000	0	0	0	0	0	0	1373.2	1	1	48.2044	35.6154
DATA	1910	23	40	0	0	A_64_P119607	ENSRNOT00000037601	10868.8	345.319	2.587011e+002	2.607418e+001	308	35.5	6.890854e+000	0	0	0	0	0	0	242.398	1	1	47.2035	36
DATA	1911	23	41	0	0	A_42_P784252	NM_133557	10894.6	345.239	1.421345e+004	1.421348e+003	13148	36	8.606706e+000	0	0	0	0	0	0	13375.8	1	1	46.5243	37.6538
DATA	1912	23	42	0	0	A_44_P1033194	NM_139328	10919.8	344.967	3.717351e+003	3.717491e+002	3554	40	9.786766e+000	0	0	0	0	0	0	3512.75	1	1	44.7812	40.069
DATA	1913	23	43	0	0	A_42_P800048	NM_207610	10945.2	344.909	6.491969e+003	6.492048e+002	6121.5	36	1.285592e+001	0	0	0	0	0	0	6159.45	1	1	45.835	39.3667
DATA	1914	23	44	0	0	A_43_P11525	NM_012710	10970.5	345.5	4.903765e+001	5.857018e+000	117.5	40	1.134962e+001	0	0	0	0	0	0	46.7086	1	1	57.5363	41.7297
DATA	1915	23	45	0	0	A_64_P019037	NM_001013886	10995.9	345.5	4.288181e+004	4.288182e+003	39846	40	1.201588e+001	0	0	0	0	0	0	40998	1	1	56.9804	42.7027
DATA	1916	23	46	0	0	A_64_P003378	NM_001024336	11021.3	345.554	2.336979e+002	2.358508e+001	298	41	7.130414e+000	0	0	0	0	0	0	224.23	1	1	48.8603	40.9697
DATA	1917	23	47	0	0	A_44_P258855	NM_053431	11046.8	345.471	6.500450e+003	6.500527e+002	6172.5	37	6.941965e+000	0	0	0	0	0	0	6258.29	1	1	47.2035	36.037
DATA	1918	23	48	0	1	ETG09_35454	ETG09_35454	11072.1	345.5	1.196117e+001	3.377497e+000	81	41.5	6.363840e+000	0	0	0	0	0	0	11.5524	1	0	56.9804	41.5385
DATA	1919	23	49	0	0	A_64_P089677	NM_001105977	11097.3	345.625	1.580019e+002	1.611097e+001	214	43	7.911337e+000	0	0	0	0	0	0	153.056	1	1	48.2044	42.4516
DATA	1920	23	50	0	0	A_64_P013609	A_64_P013609	11122.5	345.275	1.323343e+001	3.408025e+000	84	39	1.096230e+001	0	0	0	0	0	0	12.8544	1	0	46.8651	42.4583
DATA	1921	23	51	0	0	A_44_P357470	NM_030849	11148.3	345.478	8.993560e+002	8.999014e+001	936	38	1.031617e+001	0	0	0	0	0	0	875.881	1	1	46.8651	39.8571
DATA	1922	23	52	0	0	A_44_P404064	ENSRNOT00000015387	11173.5	345.5	1.137307e+003	1.137737e+002	1185	34	8.041263e+000	0	0	0	0	0	0	1110.18	1	1	49.1849	35.5238
DATA	1923	23	53	0	0	A_64_P092167	A_64_P092167	11199.1	345.5	2.244706e+001	3.842481e+000	92	38	8.838704e+000	0	0	0	0	0	0	21.9577	1	1	56.9804	38.6286
DATA	1924	23	54	0	0	A_42_P463036	ENSRNOT00000038596	11224.5	345.5	3.580657e+003	3.580792e+002	3459	38	9.294801e+000	0	0	0	0	0	0	3509.01	1	1	49.1849	38.32
DATA	1925	23	55	0	0	A_44_P1003794	NM_012576	11249.7	345.652	1.548625e+003	1.548937e+002	1561	40	1.232755e+001	0	0	0	0	0	0	1520.03	1	1	47.2035	43.1739
DATA	1926	23	56	0	0	A_64_P099006	BC105831	11274.4	345.606	7.545100e+000	3.194494e+000	78.5	38	7.005004e+000	0	0	0	0	0	0	7.41516	1	0	47.8731	37.5152
DATA	1927	23	57	0	0	A_42_P795467	NM_001108055	11300.5	345.722	1.267068e+003	1.267448e+002	1301	37	7.917488e+000	0	0	0	0	0	0	1246.58	1	1	48.2044	38.0741
DATA	1928	23	58	0	0	A_42_P629321	NM_031590	11326	345.545	1.492098e+002	1.523931e+001	223	35	1.021794e+001	0	0	0	0	0	0	146.906	1	1	55.8519	35.4103
DATA	1929	23	59	0	0	A_42_P549786	NM_022609	11351.4	345.761	5.154477e+003	5.154570e+002	5065	38	9.921065e+000	0	0	0	0	0	0	5077.29	1	1	46.5243	36.9167
DATA	1930	23	60	0	0	A_64_P006354	ENSRNOT00000043959	11376.6	345.573	6.693611e+001	7.375177e+000	138	35.5	8.118239e+000	0	0	0	0	0	0	65.9434	1	1	57.5363	37.5833
DATA	1931	23	61	0	0	A_64_P057109	A_64_P057109	11402	345.679	1.535403e+003	1.535716e+002	1611	36.5	8.512266e+000	0	0	0	0	0	0	1512.43	1	1	50.4627	37.1563
DATA	1932	23	62	0	0	A_44_P101361	NM_032070	11427.6	345.573	2.104625e+001	3.745618e+000	93	37	9.469812e+000	0	0	0	0	0	0	20.7218	1	1	65	38.0345
DATA	1933	23	63	0	0	A_64_P103354	ENSRNOT00000066893	11452.9	346.197	6.755631e+002	6.762742e+001	725	41	8.760708e+000	0	0	0	0	0	0	664.676	1	1	44.7812	39.4
DATA	1934	23	64	0	0	A_42_P746868	NM_001127580	11478.3	345.9	2.573918e+004	2.573920e+003	24969	33	7.364046e+000	0	0	0	0	0	0	25296.3	1	1	47.2035	34.6667
DATA	1935	23	65	0	0	A_42_P707838	NM_012979	11503.8	346.091	2.227287e+003	2.227504e+002	2222.5	37.5	1.106652e+001	0	0	0	0	0	0	2185.9	1	1	46.1809	39.6765
DATA	1936	23	66	0	0	A_42_P628098	NM_001107991	11528.9	345.463	1.172742e+003	1.173155e+002	1174	35	1.793042e+001	0	0	0	0	0	0	1148.9	1	1	45.835	40.2
DATA	1937	23	67	0	0	A_64_P028071	ENSRNOT00000042928	11554.5	345.648	6.197583e+004	6.197584e+003	58547	27	8.963522e+000	0	0	0	0	1	0	60590.4	1	1	57.5363	29.037
DATA	1938	23	68	0	0	A_64_P002944	A_64_P002944	11579.8	345.984	3.613331e+003	3.613466e+002	3439	27	6.298409e+000	0	0	0	0	1	0	3524.2	1	1	45.4864	27.2069
DATA	1939	23	69	0	0	A_64_P072159	XM_574060	11605.4	345.573	5.116026e+001	6.001025e+000	115	30	7.559552e+000	0	0	0	0	1	0	49.7576	1	1	57.5363	29.5357
DATA	1940	23	70	0	0	A_64_P052365	NM_001109318	11630.4	345.871	1.874123e+002	1.900347e+001	261	41	1.730672e+001	0	0	0	0	0	0	181.725	1	1	47.2035	46.0909
DATA	1941	23	71	0	0	A_64_P023150	ENSRNOT00000042777	11656.1	345.935	2.096136e+002	2.119778e+001	261	40	1.430377e+001	0	0	0	0	0	0	202.547	1	1	54.4085	41.2581
DATA	1942	23	72	0	0	A_44_P374902	NM_133429	11681.5	345.778	4.808974e+002	4.819405e+001	531	41.5	1.090914e+001	0	0	0	0	0	0	462.914	1	1	47.8731	42.25
DATA	1943	23	73	0	0	A_44_P163271	NM_198733	11706.4	345.742	1.225831e+001	3.410049e+000	86	41	9.860566e+000	0	0	0	0	0	0	11.7519	1	0	45.835	40.6667
DATA	1944	23	74	0	0	A_42_P548520	NM_001100834	11732.3	345.9	4.232502e+003	4.232622e+002	4070	38.5	8.961168e+000	0	0	0	0	0	0	4039.16	1	1	47.2035	40.9583
DATA	1945	23	75	0	0	A_64_P012154	XM_225935	11757.5	346.082	2.570847e+001	4.114202e+000	99.5	39	6.369954e+000	0	0	0	0	0	0	24.4165	1	1	48.5334	37.95
DATA	1946	23	76	0	0	A_64_P033574	NM_001000606	11782.5	345.714	3.240205e+000	3.228715e+000	75	36	8.143868e+000	0	0	0	0	0	0	-0.0896055	0	0	44.4243	36.5484
DATA	1947	23	77	0	0	A_64_P027764	NM_022685	11808.5	346	2.666371e+002	2.686069e+001	325	37	8.207946e+000	0	0	0	0	0	0	250.507	1	1	54.1152	37.2963
DATA	1948	23	78	0	0	A_42_P484738	NM_022266	11833.5	346	1.590836e+003	1.591172e+002	1548	42	6.550201e+000	0	0	0	0	0	0	1485.9	1	1	54.1152	41.7826
DATA	1949	23	79	0	0	A_64_P036355	NM_053311	11858.9	346.116	2.658480e+004	2.658482e+003	24668	39	9.893332e+000	0	0	0	0	0	0	24675.8	1	1	46.8651	39.8438
DATA	1950	23	80	0	0	A_42_P694928	NM_001109046	11884.5	346.211	3.789663e+002	3.804080e+001	428	38.5	1.004191e+001	0	0	0	0	0	0	349.407	1	1	49.8279	40.1071
DATA	1951	23	81	0	0	A_42_P588738	NM_133542	11910	346.319	6.795103e+001	7.568066e+000	138	37	1.070951e+001	0	0	0	0	0	0	62.2135	1	1	58.0869	38.125
DATA	1952	23	82	0	0	A_64_P141254	XM_001060542	11935.5	346.352	3.327125e+001	4.726226e+000	107.5	34	9.280268e+000	0	0	0	0	0	0	30.2377	1	1	57.5363	35.8636
DATA	1953	23	83	0	0	A_42_P546054	NM_001013873	11960.5	346.169	3.184289e+002	3.202202e+001	368	37.5	7.223199e+000	0	0	0	0	0	0	287.201	1	1	47.5395	37.2143
DATA	1954	23	84	66	1	DarkCorner	DarkCorner	11986.4	346.427	3.422356e+000	3.410220e+000	70	35.5	1.033487e+001	0	0	0	0	0	0	-5.86872	0	0	57.5363	36.9286
DATA	1955	23	85	66	1	DarkCorner	DarkCorner	12011.7	346.239	3.451318e+000	3.439079e+000	67	34	8.034558e+000	0	0	0	0	0	0	-6.70102	0	0	45.835	33.5745
DATA	1956	24	1	66	1	DarkCorner	DarkCorner	9890.71	351.595	3.567410e+000	3.554759e+000	59	35	8.905141e+000	0	0	0	0	0	0	-7.67794	0	0	50.4627	34.9815
DATA	1957	24	2	66	1	DarkCorner	DarkCorner	9916.5	351.817	3.583399e+000	3.570691e+000	58	37	7.593587e+000	0	0	0	0	0	0	-10.0378	0	0	51.0895	37.6552
DATA	1958	24	3	0	0	A_64_P000371	NM_017308	9941.85	351.836	1.264184e+003	1.264692e+002	1147	38	8.260129e+000	0	0	0	0	0	0	1076.02	1	1	47.5395	37.7838
DATA	1959	24	4	0	0	A_42_P772356	NM_001191597	9967.36	351.87	6.995955e+003	6.996048e+002	5941	37	8.434362e+000	0	0	0	0	0	0	5935.89	1	1	46.8651	39.4615
DATA	1961	24	6	0	0	A_42_P470757	NM_001004075	10018.3	352.029	4.410579e+003	4.410727e+002	3704	36	8.226776e+000	0	0	0	0	0	0	3725.24	1	1	46.1809	35.0435
DATA	1962	24	7	0	0	A_64_P034250	ENSRNOT00000041464	10043.6	351.573	4.957052e+001	6.136472e+000	111	40.5	9.777840e+000	0	0	0	0	0	0	41.8069	1	1	57.5363	40.3846
DATA	1963	24	8	0	0	A_64_P065063	NM_012954	10069.1	351.614	8.324371e+001	9.077663e+000	141	40.5	7.052469e+000	0	0	0	0	0	0	70.1395	1	1	65	39.5417
DATA	1964	24	9	0	0	A_64_P088866	ENSRNOT00000049194	10094.3	351.5	3.462603e+002	3.481498e+001	368	37	7.819705e+000	0	0	0	0	0	0	291.617	1	1	47.2035	39.1724
DATA	1965	24	10	0	0	A_44_P111759	NM_001000956	10119.9	351.935	7.273589e+000	3.694540e+000	73.5	36	5.230802e+000	0	0	0	0	0	0	6.12584	1	0	54.4085	35.8065
DATA	1966	24	11	0	0	A_64_P045019	ENSRNOT00000032417	10144.9	352	1.311402e+003	1.311902e+002	1194	38	1.130197e+001	0	0	0	0	0	0	1104.95	1	1	46.8651	38.9714
DATA	1967	24	12	0	0	A_64_P138989	XM_001053562	10170.5	352	8.713815e+001	9.434897e+000	139	39.5	1.320863e+001	0	0	0	0	0	0	73.4829	1	1	54.1152	42.3235
DATA	1968	24	13	0	0	A_42_P537715	NM_001025743	10195.8	351.9	2.368394e+003	2.368670e+002	1993	36	6.693762e+000	0	0	0	0	0	0	1999.72	1	1	46.8651	37.8387
DATA	1969	24	14	0	0	A_42_P453171	NM_001107063	10221.2	352.012	1.852409e+003	1.852760e+002	1650	34	6.404663e+000	0	0	0	0	0	0	1566.58	1	1	49.1849	34.6552
DATA	1971	24	16	0	0	A_64_P096157	ENSRNOT00000059486	10272.5	352	2.269546e+002	2.297793e+001	260	40	9.443713e+000	0	0	0	0	0	0	192.761	1	1	54.1152	39.3939
DATA	1972	24	17	0	0	A_43_P10076	NM_031665	10297.6	351.973	1.778343e+004	1.778346e+003	14558	40	1.045878e+001	0	0	0	0	0	0	15142.8	1	1	48.5334	40.1154
DATA	1974	24	19	0	0	A_42_P772878	NM_001011936	10348.4	351.972	3.276434e+003	3.276627e+002	2826	39	9.493309e+000	0	0	0	0	0	0	2806.73	1	1	48.2044	39.1395
DATA	1976	24	21	0	0	A_44_P447394	NM_019193	10399.2	352.356	1.083344e+004	1.083350e+003	9216.5	41	9.124495e+000	0	0	0	0	0	0	9345.39	1	1	48.5334	41.2222
DATA	1977	24	22	0	0	A_42_P504250	NM_001134987	10424.3	352.1	1.166502e+003	1.167034e+002	1086	55	3.248364e+001	0	0	0	0	1	0	1010.03	1	1	47.2035	65.5172
DATA	1978	24	23	0	0	A_42_P675802	NM_145777	10450	352.455	2.555653e+003	2.555894e+002	2217.5	37.5	1.162439e+001	0	0	0	0	0	0	2221.78	1	1	55.8519	40.3333
DATA	1979	24	24	0	0	A_64_P111843	XM_001074913	10475.3	352.338	1.345896e+003	1.346349e+002	1234.5	42	1.090945e+001	0	0	0	0	0	0	1174.88	1	1	48.5334	42.1176
DATA	1980	24	25	0	0	A_44_P118724	NM_019361	10500.8	351.821	1.199984e+004	1.199989e+003	10503.5	36.5	8.539991e+000	0	0	0	0	0	0	10519.8	1	1	46.1809	36.6875
DATA	1981	24	26	0	0	A_43_P21749	NM_001108329	10525.9	352.278	5.161708e+001	6.216726e+000	112.5	34	1.012896e+001	0	0	0	0	0	0	45.448	1	1	47.8731	35.7188
DATA	1982	24	27	0	0	A_43_P11879	NM_017250	10551.4	352.183	6.432209e+001	7.298628e+000	126	38	9.696656e+000	0	0	0	0	0	0	56.8906	1	1	47.5395	38.1071
DATA	1983	24	28	0	0	A_64_P023182	NM_001000033	10576.2	352.426	4.500608e+000	3.463067e+000	73.5	37	1.089468e+001	0	0	0	0	0	0	3.99855	1	0	42.9674	37.2
DATA	1985	24	30	0	0	A_44_P368461	NM_001107085	10627.6	352.427	2.567707e+001	4.261752e+000	92	34	6.572791e+000	0	0	0	0	0	0	23.0294	1	1	57.5363	35.2609
DATA	1986	24	31	0	0	A_64_P097257	A_64_P097257	10653.1	352.5	7.950561e+001	8.641245e+000	140.5	37.5	5.999615e+000	0	0	0	0	0	0	71.648	1	1	56.9804	36.6538
DATA	1987	24	32	0	0	A_64_P100634	NM_001100171	10678.3	352.58	3.684431e+002	3.699804e+001	411	36	7.865610e+000	0	0	0	0	0	0	333.599	1	1	46.8651	36.1667
DATA	1988	24	33	0	0	A_64_P041902	NM_001025653	10704	352.208	3.417805e+003	3.417969e+002	3179	35	8.065892e+000	0	0	0	0	0	0	3109.49	1	1	46.8651	35.1
DATA	1990	24	35	0	0	A_64_P116171	NM_001004266	10754.5	352.507	1.947524e+002	1.975649e+001	247	39	9.462266e+000	0	0	0	0	0	0	178.861	1	1	49.1849	37.0345
DATA	1991	24	36	0	0	A_44_P243279	NM_001134780	10779.8	352.5	3.989847e+002	4.003523e+001	444	36	1.042703e+001	0	0	0	0	0	0	368.133	1	1	46.5243	35.6333
DATA	1992	24	37	0	0	A_64_P151468	XM_001062494	10805.5	352.5	2.117021e+001	3.913030e+000	88	36	9.751757e+000	0	0	0	0	0	0	19.6247	1	1	65	35.25
DATA	1993	24	38	0	0	A_64_P075769	ENSRNOT00000043984	10830.8	352.524	2.829295e+003	2.829485e+002	2789.5	37	6.011101e+000	0	0	0	0	0	0	2634.64	1	1	44.0646	36.7333
DATA	1994	24	39	0	0	A_42_P508921	NM_031703	10856.4	352.582	7.901495e+000	3.355722e+000	78	41.5	8.690930e+000	0	0	0	0	0	0	7.39098	1	0	45.835	41.625
DATA	1995	24	40	0	0	A_44_P503376	NM_001000274	10881.6	352.573	3.258878e+000	3.259618e+000	72	37	1.262143e+001	0	0	0	0	0	0	2.65733	0	0	57.5363	40.1304
DATA	1996	24	41	0	0	A_64_P093088	NM_001000816	10907	352.545	2.721015e+001	4.226105e+000	97	39	1.020878e+001	0	0	0	0	0	0	25.6709	1	1	65	39.8276
DATA	1997	24	42	0	0	A_44_P489608	NM_023967	10932.5	352.631	1.683087e+002	1.713617e+001	231	36	1.027229e+001	0	0	0	0	0	0	159.445	1	1	45.4864	38
DATA	1998	24	43	0	0	A_44_P213088	ENSRNOT00000037507	10957.6	352.573	2.935051e+001	4.347814e+000	98	39.5	1.223361e+001	0	0	0	0	0	0	27.9141	1	1	57.5363	42.375
DATA	1999	24	44	0	0	A_64_P060725	NM_001025278	10983.4	352.573	1.809873e+001	3.672182e+000	88	38.5	9.259744e+000	0	0	0	0	0	0	17.28	1	1	57.5363	38.5
DATA	2000	24	45	0	0	A_44_P384698	XM_216321	11008.5	353.016	1.933518e+003	1.933780e+002	1959	43.5	1.043817e+001	0	0	0	0	0	0	1852.78	1	1	43.7019	46.3462
DATA	2001	24	46	0	0	A_42_P696084	NM_031022	11034	352.824	2.288802e+003	2.289022e+002	2296.5	41	8.044470e+000	0	0	0	0	0	0	2200.9	1	1	46.8651	39.9722
DATA	2002	24	47	0	0	A_64_P014918	NM_001108246	11059.4	352.771	1.306691e+003	1.307074e+002	1343	41	4.435751e+000	0	0	0	0	0	0	1260.65	1	1	47.2035	39.3043
DATA	2003	24	48	0	0	A_64_P032690	ENSRNOT00000049975	11084.6	352.573	8.514157e+004	8.514157e+003	82497	42	7.447450e+000	0	0	0	0	0	0	82393.3	1	1	57.5363	42.2581
DATA	2004	24	49	0	0	A_42_P481516	NM_134364	11110.4	352.691	4.019956e+003	4.020078e+002	3928.5	45	1.130664e+001	0	0	0	0	0	0	3901.67	1	1	46.5243	43.56
DATA	2005	24	50	0	0	A_64_P166158	ENSRNOT00000013694	11135.5	352.648	1.570365e+002	1.601349e+001	227	39	1.198449e+001	0	0	0	0	0	0	152.819	1	1	57.5363	41.8065
DATA	2006	24	51	0	0	A_64_P140338	A_64_P140338	11160.9	352.614	1.059809e+001	3.301879e+000	80	37	9.551265e+000	0	0	0	0	0	0	10.3388	1	0	57.259	39.32
DATA	2007	24	52	0	1	ERCC-00062_278	ERCC-00062_278	11186	352.627	1.831678e+002	1.858066e+001	256	37	1.037231e+001	0	0	0	0	0	0	179.077	1	1	40.6843	39.6571
DATA	2008	24	53	0	0	A_64_P110838	NM_001013175	11211.7	352.932	2.102789e+002	2.125722e+001	279	39	9.149769e+000	0	0	0	0	0	0	205.998	1	1	48.2044	39.5806
DATA	2009	24	54	0	0	A_42_P802358	NM_001024341	11237.1	353.03	1.692980e+004	1.692983e+003	16576	41.5	1.442564e+001	0	0	0	0	0	0	16613.7	1	1	46.5243	44.3929
DATA	2010	24	55	0	0	A_64_P010421	A_64_P010421	11262.1	352.97	4.513327e+001	5.477831e+000	117.5	40	9.233559e+000	0	0	0	0	0	0	44.3537	1	1	46.5243	39.5172
DATA	2011	24	56	0	0	A_43_P13320	NM_138880	11287.8	352.986	1.359073e+001	3.385350e+000	84	34	6.092830e+000	0	0	0	0	0	0	13.3719	1	0	46.8651	35.5484
DATA	2012	24	57	0	0	A_42_P800916	NM_022403	11313.5	353	4.154321e+001	5.182119e+000	111	39	9.035913e+000	0	0	0	0	0	0	40.9118	1	1	54.1152	38.9091
DATA	2013	24	58	0	0	A_42_P554610	XM_001064863	11338.7	352.9	1.200572e+004	1.200576e+003	11592.5	39	9.460304e+000	0	0	0	0	0	0	11830.4	1	1	47.2035	37.6429
DATA	2014	24	59	0	0	A_42_P476353	NM_001012113	11364.1	352.896	1.049100e+004	1.049104e+003	10069	41	1.127434e+001	0	0	0	0	0	0	10341.1	1	1	46.8651	39.7391
DATA	2015	24	60	0	0	A_43_P12234	NM_022516	11389.5	353	2.899148e+003	2.899313e+002	2886	38	8.408886e+000	0	0	0	0	0	0	2857.82	1	1	48.5334	37.931
DATA	2016	24	61	0	0	A_64_P048315	ENSRNOT00000044039	11414.7	353	4.722788e+002	4.732923e+001	542.5	37	1.157706e+001	0	0	0	0	0	0	465.417	1	1	49.1849	40.3125
DATA	2017	24	62	0	0	A_44_P477047	NM_171983	11440.5	353	7.233387e+004	7.233387e+003	71434	39	1.174514e+001	0	0	0	0	0	0	71240.1	1	1	54.1152	40.3448
DATA	2018	24	63	0	0	A_43_P11871	NM_017230	11465.4	353	9.921138e+001	1.039425e+001	169.5	36	7.248061e+000	0	0	0	0	0	0	97.6245	1	1	46.5243	37.6429
DATA	2019	24	64	0	0	A_64_P060608	XM_001068783	11491	353.319	5.126124e+001	5.992656e+000	123	35	7.480320e+000	0	0	0	0	0	0	50.3804	1	1	65	35.8684
DATA	2020	24	65	0	0	A_64_P115811	NM_001008516	11516.5	353.352	3.341402e+001	4.563970e+000	105.5	38	1.227340e+001	0	0	0	0	0	0	32.7887	1	1	57.5363	40
DATA	2021	24	66	0	0	A_44_P131296	ENSRNOT00000039892	11541.6	353.427	8.566111e+001	9.114769e+000	151.5	32	1.291238e+001	0	0	0	0	0	0	83.9023	1	1	57.5363	34.5909
DATA	2022	24	67	0	0	A_44_P668388	NM_001109245	11567.2	352.857	1.635599e+002	1.665124e+001	229	27	6.647014e+000	0	0	0	0	1	0	159.834	1	1	46.5243	27.871
DATA	2023	24	68	0	0	A_64_P069729	NM_019189	11592.9	353.151	5.958337e+001	6.730322e+000	127	27	6.516733e+000	0	0	0	0	1	0	58.0772	1	1	47.2035	27.697
DATA	2024	24	69	1028	1	(+)E1A_r60_1	E1A_r60_1	11618	353.455	3.464493e+001	4.674818e+000	106.5	30	7.947656e+000	0	0	0	1	0	0	33.6735	1	1	55.8519	31.3704
DATA	2025	24	70	0	0	A_64_P165441	NM_001109059	11643.4	353.427	7.403689e+001	8.045503e+000	143.5	40	1.086615e+001	0	0	0	0	0	0	71.7272	1	1	57.5363	38.8387
DATA	2026	24	71	0	0	A_44_P1034910	NM_201562	11668.7	353.122	3.157791e+003	3.157949e+002	3098	39.5	1.609398e+001	0	0	0	0	0	0	3048.26	1	1	48.8603	40.5333
DATA	2027	24	72	0	0	A_42_P631818	NM_030854	11694.2	353.261	6.944544e+003	6.944616e+002	6783	39	1.160997e+001	0	0	0	0	0	0	6677.26	1	1	46.5243	39.5161
DATA	2028	24	73	0	0	A_64_P095620	ENSRNOT00000031258	11719.4	352.797	4.123253e+001	5.211039e+000	112	42	9.891433e+000	0	0	0	0	0	0	39.4749	1	1	45.1352	41.9259
DATA	2029	24	74	0	0	A_42_P726573	NM_053838	11744.9	353.104	1.671175e+003	1.671482e+002	1674	37	8.149249e+000	0	0	0	0	0	0	1592.53	1	1	46.8651	38.5556
DATA	2030	24	75	0	0	A_64_P029142	NM_001107866	11770.4	353.427	1.123070e+002	1.168245e+001	179	41.5	9.541333e+000	0	0	0	0	0	0	106.49	1	1	57.5363	40
DATA	2031	24	76	0	0	A_43_P22902	NM_001106874	11795.9	353.179	3.246317e+000	3.234805e+000	71.5	36	7.540856e+000	0	0	0	0	0	0	-2.59279	0	0	42.5954	36.2581
DATA	2032	24	77	0	0	A_42_P619008	NM_001013079	11820.9	353.381	4.940010e+003	4.940117e+002	4598	43	7.234087e+000	0	0	0	0	0	0	4632.83	1	1	44.7812	41.1739
DATA	2033	24	78	0	0	A_64_P054421	A_64_P054421	11846.5	353.5	1.742590e+001	3.707852e+000	92	41.5	7.173699e+000	0	0	0	0	0	0	16.2428	1	1	65	41.625
DATA	2034	24	79	0	0	A_42_P627330	NM_001106628	11871.6	353.36	5.888629e+002	5.897834e+001	625	42	1.064138e+001	0	0	0	0	0	0	545.394	1	1	48.8603	42.1034
DATA	2035	24	80	0	0	A_64_P049613	A_64_P049613	11896.9	353.13	3.709457e+001	4.975700e+000	109	38	9.121916e+000	0	0	0	0	0	0	34.1237	1	1	46.8651	39.069
DATA	2036	24	81	0	0	A_42_P708614	NM_001130505	11922.6	353.427	5.176201e+004	5.176202e+003	47286	37.5	1.178624e+001	0	0	0	0	0	0	47276.6	1	1	57.5363	39.7857
DATA	2037	24	82	0	0	A_42_P660068	NM_031350	11947.9	353.39	2.170263e+003	2.170524e+002	2045.5	38	9.381882e+000	0	0	0	0	0	0	1967.44	1	1	49.8279	38.6552
DATA	2038	24	83	66	1	DarkCorner	DarkCorner	11973.5	353.063	3.404125e+000	3.392053e+000	68	34	8.272119e+000	0	0	0	0	0	0	-6.31346	0	0	38.2652	34.8065
DATA	2039	24	84	66	1	DarkCorner	DarkCorner	11998.5	353.053	3.431759e+000	3.419590e+000	71	32	7.275671e+000	0	0	0	0	0	0	-4.14182	0	0	48.8603	32.8462
DATA	2040	24	85	66	1	DarkCorner	DarkCorner	12023.9	353.357	3.460933e+000	3.448660e+000	70	29	7.265308e+000	0	0	0	0	1	0	-2.87834	0	0	46.8651	29.6379
DATA	2041	25	1	66	1	DarkCorner	DarkCorner	9878.22	359.123	3.558807e+000	3.546187e+000	60	34	8.577633e+000	0	0	0	0	0	0	-5.71697	0	0	47.8731	34.0672
DATA	2042	25	2	66	1	DarkCorner	DarkCorner	9904.21	359.127	3.575951e+000	3.563270e+000	60	37	9.017334e+000	0	0	0	0	0	0	-7.74759	0	0	46.8651	36.5135
DATA	2043	25	3	0	0	A_64_P106975	A_64_P106975	9929.16	359.103	2.303763e+002	2.331375e+001	268	37	5.835984e+000	0	0	0	0	0	0	196.452	1	1	46.5243	37.6061
DATA	2044	25	4	0	0	A_42_P799702	NM_145093	9954.79	359.056	3.108629e+002	3.129288e+001	328	42.5	7.567247e+000	0	0	0	1	0	0	264.173	1	1	46.8651	41.3214
DATA	2045	25	5	0	0	A_42_P704429	NM_053428	9980.42	359.427	3.078133e+004	3.078136e+003	25092	37	7.300486e+000	0	0	0	1	0	0	26084.1	1	1	57.5363	37.5833
DATA	2046	25	6	0	0	A_64_P129730	NM_001033896	10005.6	359.342	1.312807e+002	1.361485e+001	178.5	36	1.068310e+001	0	0	0	0	0	0	110.999	1	1	48.2044	36.0417
DATA	2047	25	7	0	0	A_64_P156308	NM_001008284	10031.1	359.386	7.759781e+002	7.768193e+001	703	33	5.100000e+000	0	0	0	0	0	0	654.985	1	1	57.259	33.48
DATA	2048	25	8	0	0	A_44_P152029	A_44_P152029	10056.5	359.352	1.821139e+001	4.050887e+000	83	42	8.377718e+000	0	0	0	0	0	0	15.3537	1	1	57.5363	41.8846
DATA	2049	25	9	0	0	A_42_P751152	NM_001106360	10081.6	359.427	5.783526e+004	5.783527e+003	47842	41	8.303806e+000	0	0	0	0	0	0	48727.4	1	1	57.5363	40.1034
DATA	2050	25	10	0	0	A_64_P010494	NM_001001421	10107	359.329	1.211957e+002	1.264912e+001	167	37	7.386772e+000	0	0	0	0	0	0	102.088	1	1	49.8279	37.4242
DATA	2051	25	11	0	0	A_64_P054606	NM_001107279	10132.2	359.033	4.360074e+002	4.375083e+001	435	36.5	8.953263e+000	0	0	0	0	0	0	367.35	1	1	44.7812	36.6667
DATA	2052	25	12	0	0	A_44_P335679	NM_001108168	10158	359.455	4.147166e+001	5.503743e+000	104.5	40	1.570668e+001	0	0	0	0	0	0	34.9654	1	1	65	42.5405
DATA	2053	25	13	0	0	A_64_P128766	NM_001034912	10183.6	359.44	1.386849e+002	1.433174e+001	179.5	38	9.642870e+000	0	0	0	0	0	0	117.054	1	1	49.5074	39.5806
DATA	2054	25	14	0	0	A_42_P595591	NM_031011	10208.7	359.373	2.143635e+004	2.143638e+003	17479	35	7.173089e+000	0	0	0	0	0	0	18118.8	1	1	49.1849	36.8966
DATA	2055	25	15	0	0	A_44_P962846	ENSRNOT00000058887	10233.9	359.494	4.599635e+002	4.613723e+001	458	36	8.602700e+000	0	0	0	0	0	0	389.477	1	1	50.4627	35.8387
DATA	2056	25	16	0	0	A_64_P111878	XR_005569	10259.1	359.877	7.977667e+002	7.985763e+001	806.5	39	8.741190e+000	0	0	0	0	0	0	676.955	1	1	43.3362	39.3784
DATA	2057	25	17	0	0	A_64_P149225	NM_001100833	10284.9	359.5	1.268464e+005	1.268464e+004	107649	40	1.335812e+001	0	0	0	0	0	0	107904	1	1	56.9804	41.5758
DATA	2058	25	18	0	0	A_64_P032361	ENSRNOT00000061428	10310.3	359.373	1.281871e+003	1.282370e+002	1148	39.5	1.171913e+001	0	0	0	0	0	0	1093.43	1	1	46.1809	40.2
DATA	2059	25	19	0	0	A_64_P038843	A_64_P038843	10335.5	359.985	2.179485e+001	4.178972e+000	85	38.5	7.706041e+000	0	0	0	0	0	0	18.6471	1	1	47.2035	38.6875
DATA	2060	25	20	1028	1	(+)E1A_r60_a97	E1A_r60_a97	10361.1	359.5	1.092834e+001	3.718217e+000	78	38	1.117624e+001	0	0	0	0	0	0	9.3806	1	0	65	39.6216
DATA	2061	25	21	0	0	A_42_P586883	NM_001106416	10386.5	359.5	5.115387e+001	6.221750e+000	109	37	9.130975e+000	0	0	0	0	0	0	44.0627	1	1	57.5363	39.2667
DATA	2062	25	22	0	0	A_42_P626023	NM_001107265	10411.9	359.5	7.284528e+002	7.293069e+001	689	50	3.265852e+001	0	0	0	0	1	0	629.796	1	1	56.9804	66.3103
DATA	2063	25	23	0	0	A_64_P304646	ENSRNOT00000046873	10437.3	359.5	6.234950e+001	7.157414e+000	121	47	2.664068e+001	0	0	0	0	1	0	54.1156	1	1	57.5363	55.375
DATA	2064	25	24	0	0	A_42_P540711	NM_133568	10462.4	359.582	1.730574e+004	1.730578e+003	14913.5	42.5	1.141732e+001	0	0	0	0	0	0	15080.6	1	1	53.2255	42.7
DATA	2065	25	25	0	0	A_64_P079149	XM_001063529	10488.1	359.5	1.695872e+002	1.731328e+001	219	40	9.381449e+000	0	0	0	0	0	0	148.412	1	1	56.9804	38.5588
DATA	2066	25	26	0	0	A_42_P507072	FQ213070	10513.6	359.479	4.964449e+003	4.964570e+002	4353	40	1.026634e+001	0	0	0	0	0	0	4363.5	1	1	48.2044	37.0909
DATA	2067	25	27	0	0	A_44_P314270	ENSRNOT00000015469	10538.5	359.5	2.351372e+002	2.376629e+001	276	36	1.017073e+001	0	0	0	0	0	0	207.579	1	1	49.1849	37.2667
DATA	2068	25	28	0	0	A_64_P026098	ENSRNOT00000027092	10564.4	359.573	1.134362e+002	1.185365e+001	167.5	36.5	1.009197e+001	0	0	0	0	0	0	100.607	1	1	57.5363	37.25
DATA	2069	25	29	0	0	A_64_P018599	XM_229548	10588.6	359.885	3.436708e+000	3.424521e+000	66	38	1.017946e+001	0	0	0	0	0	0	-2.1117	0	0	50.1463	37.5833
DATA	2070	25	30	0	0	A_43_P15907	NM_001134567	10615	359.545	6.389137e+001	7.241208e+000	124	34	7.937042e+000	0	0	0	0	0	0	57.1931	1	1	55.8519	34.0571
DATA	2071	25	31	0	0	A_64_P151804	A_64_P151804	10640.4	359.573	8.996131e+001	9.614314e+000	153.5	39	1.700710e+001	0	0	0	0	0	0	80.9118	1	1	57.5363	43.7931
DATA	2072	25	32	0	0	A_42_P642743	NM_017005	10665.8	359.875	1.389909e+004	1.389913e+003	12476	37.5	7.491794e+000	0	0	0	0	0	0	12560.6	1	1	47.5395	36.8571
DATA	2073	25	33	0	0	A_42_P630463	NM_022238	10691.1	359.757	4.990123e+002	5.001421e+001	519.5	34.5	8.670203e+000	0	0	0	0	0	0	453.103	1	1	46.5243	36
DATA	2074	25	34	0	0	A_64_P119533	NM_001000351	10716	359.871	2.623899e+001	4.250621e+000	92.5	34	9.263177e+000	0	0	0	0	0	0	23.9366	1	1	46.8651	36.25
DATA	2075	25	35	0	0	A_64_P158068	FQ219182	10741.9	359.732	3.290059e+003	3.290227e+002	2978	40	8.538869e+000	0	0	0	0	0	0	3015.86	1	1	47.5395	38.3333
DATA	2076	25	36	0	0	A_64_P000779	XM_225838	10767	359.653	3.697578e+001	4.964418e+000	102	36	8.784783e+000	0	0	0	0	0	0	34.0518	1	1	48.5334	36.6207
DATA	2077	25	37	0	0	A_44_P630082	ENSRNOT00000020640	10792.3	360.206	2.036154e+002	2.062677e+001	253	36	8.864345e+000	0	0	0	0	0	0	188.39	1	1	46.5243	35.4375
DATA	2078	25	38	0	0	A_42_P717654	XM_001063683	10818.2	359.878	4.056641e+003	4.056773e+002	3858.5	37	8.841286e+000	0	0	0	0	0	0	3770.78	1	1	47.8731	37.6563
DATA	2079	25	39	0	0	A_42_P792382	NM_017257	10843.4	360.265	7.926504e+003	7.926572e+002	7269	39	8.677094e+000	0	0	0	0	0	0	7401.09	1	1	46.5243	41.1333
DATA	2080	25	40	0	0	A_64_P075035	NM_001001014	10868.9	359.614	1.639714e+002	1.671669e+001	226	37	1.113852e+001	0	0	0	0	0	0	153.776	1	1	57.259	42
DATA	2081	25	41	0	0	A_64_P021281	NM_001039022	10894.4	359.742	5.846531e+003	5.846621e+002	5490	34.5	6.946300e+000	0	0	0	0	0	0	5506.75	1	1	46.1809	35.8182
DATA	2082	25	42	0	0	A_44_P729533	TC581820	10919.7	359.754	8.273286e+003	8.273348e+002	7615	43.5	1.166186e+001	0	0	0	0	0	0	7825.05	1	1	45.1352	43.4688
DATA	2083	25	43	0	0	A_42_P802358	NM_001024341	10944.9	359.896	1.675155e+004	1.675158e+003	15736	40	7.813560e+000	0	0	0	0	0	0	15907.9	1	1	46.8651	39.1379
DATA	2084	25	44	0	0	A_42_P481087	XM_232226	10970.2	360	8.790616e+002	8.796439e+001	920	43	9.669062e+000	0	0	0	0	0	0	838.047	1	1	49.1849	43.4571
DATA	2085	25	45	0	0	A_42_P561597	NM_001106486	10995.8	360	1.172121e+004	1.172126e+003	10684	43	1.145374e+001	0	0	0	0	0	0	11216.7	1	1	46.8651	44.6
DATA	2086	25	46	0	0	A_64_P113381	A_64_P113381	11020.9	359.806	1.049331e+001	3.345482e+000	80	39	7.892598e+000	0	0	0	0	0	0	10.0771	1	0	46.1809	39.6897
DATA	2087	25	47	0	0	A_64_P088695	NM_001134414	11046.6	360.027	1.713275e+003	1.713568e+002	1675	41	5.679473e+000	0	0	0	0	0	0	1650.99	1	1	48.5334	40.5556
DATA	2088	25	48	0	0	A_44_P728586	ENSRNOT00000013367	11072.1	360.065	1.086345e+003	1.086803e+002	1123	40	8.013382e+000	0	0	0	0	0	0	1050.24	1	1	54.4085	39
DATA	2089	25	49	0	0	A_42_P544898	NM_001108279	11097.5	359.871	3.292201e+001	4.553749e+000	105	45	1.064519e+001	0	0	0	0	0	0	31.9231	1	1	47.8731	44.7941
DATA	2090	25	50	0	0	A_44_P432910	NM_012814	11122.6	360.404	1.357080e+005	1.357080e+004	131522	39	1.344554e+001	0	0	0	0	0	0	131959	1	1	57.8122	41.3478
DATA	2091	25	51	0	0	A_64_P157820	XM_001079095	11148.3	359.789	9.329757e+001	9.840578e+000	162	36	8.236099e+000	0	0	0	0	0	0	90.9524	1	1	47.2035	37.6
DATA	2092	25	52	0	0	A_42_P601802	NM_134465	11173.8	359.868	3.399924e+003	3.400067e+002	3317.5	38.5	1.168949e+001	0	0	0	0	0	0	3322.27	1	1	46.1809	41.5313
DATA	2093	25	53	0	0	A_64_P039737	NM_001130508	11199.1	360.232	8.991154e+002	8.996549e+001	947	38.5	1.104536e+001	0	0	0	0	0	0	880.44	1	1	46.5243	39.6667
DATA	2094	25	54	0	0	A_42_P648800	AA998304	11224.4	360.194	3.627781e+002	3.641084e+001	422	39	9.782819e+000	0	0	0	0	0	0	355.899	1	1	47.8731	40.3913
DATA	2095	25	55	0	0	A_64_P007009	ENSRNOT00000014567	11249.6	360.304	1.853605e+003	1.853865e+002	1890	43.5	1.603000e+001	0	0	0	0	0	0	1821.35	1	1	53.2255	43.9333
DATA	2096	25	56	0	0	A_64_P049527	TC606896	11275.2	360.239	2.473052e+002	2.492412e+001	316.5	38	7.098993e+000	0	0	0	0	0	0	243.325	1	1	46.8651	37.9355
DATA	2097	25	57	0	0	A_44_P281595	NM_001037556	11300.4	359.899	7.747019e+001	8.343268e+000	148	35.5	7.244063e+000	0	0	0	0	0	0	76.3013	1	1	47.5395	36.7083
DATA	2098	25	58	0	0	A_44_P374638	NM_024391	11326	360.455	3.419435e+001	4.612006e+000	102	42	8.261178e+000	0	0	0	0	0	0	33.7061	1	1	55.8519	39.6
DATA	2100	25	60	0	0	A_64_P046416	A_64_P046416	11376.5	360.13	7.255908e+001	7.887579e+000	143.5	39	8.539126e+000	0	0	0	0	0	0	71.5692	1	1	47.2035	40.2
DATA	2101	25	61	0	0	A_44_P428560	NM_001001358	11401.9	360.099	4.950292e+001	5.837229e+000	119	36	9.077632e+000	0	0	0	0	0	0	48.8221	1	1	46.8651	37.8182
DATA	2102	25	62	0	0	A_44_P208887	NM_001105774	11427.5	360.5	1.150981e+002	1.191852e+001	187.5	37.5	1.087595e+001	0	0	0	0	0	0	113.471	1	1	65	39.6875
DATA	2103	25	63	0	0	A_42_P533792	NM_001106575	11452.7	360.589	1.014593e+004	1.014598e+003	9827	39	9.095612e+000	0	0	0	0	0	0	9995.38	1	1	53.2255	40.7143
DATA	2104	25	64	0	0	A_42_P802550	NM_017365	11478.2	360.361	5.166783e+002	5.176073e+001	570	36	7.126940e+000	0	0	0	0	0	0	508.467	1	1	47.8731	35.9714
DATA	2105	25	65	0	0	A_42_P545129	ENSRNOT00000007554	11503.9	360.389	9.423748e+002	9.428859e+001	988	38	1.187610e+001	0	0	0	0	0	0	926.11	1	1	48.2044	40.6667
DATA	2106	25	66	0	0	A_42_P500675	NM_013179	11529.1	360.232	4.104962e+002	4.116723e+001	477.5	38.5	1.125051e+001	0	0	0	0	0	0	402.727	1	1	46.5243	39.8235
DATA	2107	25	67	0	0	A_44_P127238	NM_001127655	11554.3	360.722	5.290201e+002	5.299368e+001	560	28.5	1.165953e+001	0	0	0	0	0	0	517.986	1	1	50.7771	32.2308
DATA	2108	25	68	0	0	A_64_P042142	ENSRNOT00000027371	11579.9	360.353	8.068929e+001	8.652278e+000	148.5	26	7.014151e+000	0	0	0	0	1	0	78.8153	1	1	46.1809	27.9143
DATA	2109	25	69	0	0	A_44_P279756	NM_022848	11605.4	360.573	3.797459e+001	4.922169e+000	106.5	27	7.590668e+000	0	0	0	0	1	0	36.9928	1	1	57.5363	27.8148
DATA	2110	25	70	0	0	A_64_P119597	NM_001106871	11630.6	360.573	5.580641e+001	6.403908e+000	121.5	38	1.113873e+001	0	0	0	0	0	0	54.1996	1	1	57.5363	36.9259
DATA	2111	25	71	0	0	A_44_P790674	NM_001191933	11656.1	360.5	9.867002e+001	1.035818e+001	163	36	1.438012e+001	0	0	0	0	0	0	95.502	1	1	56.9804	40
DATA	2112	25	72	0	0	A_44_P405618	ENSRNOT00000025426	11681.6	360.526	2.607461e+002	2.626584e+001	298	37.5	1.216463e+001	0	0	0	0	0	0	251.43	1	1	50.1463	38.5667
DATA	2113	25	73	0	0	A_42_P719478	NM_001191779	11706.7	360.5	8.364998e+001	8.947816e+000	135	38	1.335846e+001	0	0	0	1	0	0	80.3357	1	1	57.5363	40.3214
DATA	2114	25	74	0	0	A_64_P061424	A_64_P061424	11732.4	360.573	2.522008e+001	4.067168e+000	97	36	7.010480e+000	0	0	0	0	0	0	24.1122	1	1	57.5363	37.0357
DATA	2115	25	75	0	0	A_44_P1042876	NM_212504	11757.6	360.878	1.452388e+003	1.452741e+002	1401	42.5	8.835760e+000	0	0	0	0	0	0	1382.06	1	1	48.5334	42.375
DATA	2116	25	76	0	0	A_44_P470043	NM_001108103	11783	360.545	1.028579e+002	1.077881e+001	174.5	40	1.081674e+001	0	0	0	0	0	0	97.3701	1	1	55.8519	39.2424
DATA	2117	25	77	0	0	A_64_P108484	ENSRNOT00000046584	11808.4	360.573	4.219678e+001	5.320312e+000	112.5	36.5	7.825543e+000	0	0	0	0	0	0	39.7262	1	1	57.5363	37.75
DATA	2118	25	78	0	0	A_42_P666065	NM_001014069	11833.7	361	5.176002e+002	5.186252e+001	537	39.5	1.046261e+001	0	0	0	0	0	0	484.495	1	1	48.5334	38.8846
DATA	2119	25	79	0	0	A_64_P136571	NM_001134545	11859.1	361	9.936809e+001	1.046398e+001	166	41	9.956896e+000	0	0	0	0	0	0	92.4358	1	1	46.1809	42.1613
DATA	2120	25	80	0	0	A_42_P816740	NM_001108705	11884.6	360.9	3.830013e+002	3.844213e+001	428	38	1.058334e+001	0	0	0	0	0	0	353.941	1	1	47.8731	39.5882
DATA	2121	25	81	0	0	A_64_P018142	NM_001100716	11910	360.545	2.654882e+002	2.675614e+001	315	35.5	9.342066e+000	0	0	0	0	0	0	243.636	1	1	65	37.375
DATA	2122	25	82	0	0	A_42_P779687	ENSRNOT00000034449	11935.3	360.753	1.227706e+004	1.227710e+003	10931.5	43	1.250140e+001	0	0	0	0	0	0	11185.5	1	1	48.2044	43.8519
DATA	2124	25	84	66	1	DarkCorner	DarkCorner	11986.4	360.596	3.413470e+000	3.401365e+000	67	35	6.989002e+000	0	0	0	0	0	0	-7.31625	0	0	57.8122	34
DATA	2125	25	85	66	1	DarkCorner	DarkCorner	12011.6	361.232	3.441362e+000	3.429159e+000	70.5	33	6.393258e+000	0	0	0	0	0	0	-4.93957	0	0	46.8651	32.4651
DATA	2126	26	1	66	1	DarkCorner	DarkCorner	9891.27	366.712	3.567580e+000	3.554928e+000	59	37	9.475094e+000	0	0	0	0	0	0	-8.15766	0	0	50.7771	36.7209
DATA	2127	26	2	66	1	DarkCorner	DarkCorner	9916.58	366.427	3.583041e+000	3.570334e+000	58	37.5	6.596602e+000	0	0	0	0	0	0	-7.8133	0	0	57.5363	37.0909
DATA	2128	26	3	0	0	A_42_P713844	NM_001106167	9941.93	366.493	8.883262e+002	8.890487e+001	811	37.5	9.254428e+000	0	0	0	0	0	0	756.227	1	1	47.8731	39.8889
DATA	2129	26	4	0	0	A_42_P627219	NM_001012468	9967.48	366.352	1.028636e+004	1.028642e+003	8621	41	8.051469e+000	0	0	0	0	0	0	8729.5	1	1	47.8731	42.1154
DATA	2130	26	5	0	0	A_42_P461003	NM_001044283	9992.7	366.58	1.375967e+004	1.375972e+003	11470	35	8.119966e+000	0	0	0	0	0	0	11648.1	1	1	52.3208	35.5769
DATA	2131	26	6	0	0	A_44_P1019923	NM_022522	10018.3	366.5	2.252709e+003	2.252999e+002	1911.5	35.5	9.952998e+000	0	0	0	0	0	0	1903.27	1	1	48.5334	36.6071
DATA	2132	26	7	0	0	A_42_P814056	NM_001108866	10043.6	366.64	9.850880e+003	9.850946e+002	8121.5	34	7.980842e+000	0	0	0	0	0	0	8311.11	1	1	48.8603	35.9583
DATA	2133	26	8	0	0	A_42_P795269	NM_001134730	10069.1	366.672	9.414872e+003	9.414942e+002	7847	41	7.780647e+000	0	0	0	0	0	0	7936.04	1	1	45.835	40.3333
DATA	2134	26	9	0	0	A_42_P763522	NM_001013980	10094.5	366.5	3.328487e+003	3.328684e+002	2796.5	38	8.182397e+000	0	0	0	0	0	0	2804.48	1	1	49.1849	39.625
DATA	2135	26	10	0	0	A_44_P292437	NM_153309	10120.1	366.357	2.462354e+002	2.488829e+001	275	37	8.811415e+000	0	0	0	0	0	0	207.478	1	1	46.8651	36.7778
DATA	2136	26	11	0	0	A_64_P065313	ENSRNOT00000042070	10145.4	366.573	1.544829e+002	1.586648e+001	199	37.5	9.802022e+000	0	0	0	0	0	0	130.23	1	1	57.5363	37.7188
DATA	2137	26	12	0	0	A_64_P008047	NM_001033670	10170.8	366.644	2.953347e+004	2.953349e+003	23762	39	1.185007e+001	0	0	0	0	0	0	24919.2	1	1	48.5334	39.3
DATA	2138	26	13	0	0	A_64_P080612	TC638889	10196.1	367.094	5.863996e+003	5.864107e+002	5061.5	36	7.751466e+000	0	0	0	0	0	0	4954.21	1	1	45.835	37.9091
DATA	2139	26	14	0	0	A_43_P17696	NM_001004257	10221.4	366.853	2.925005e+003	2.925227e+002	2532	34	7.717963e+000	0	0	0	0	0	0	2475.24	1	1	46.8651	35.4815
DATA	2140	26	15	0	0	A_64_P019608	NM_001105713	10246.7	366.9	7.975868e+002	7.983979e+001	720	39	8.821196e+000	0	0	0	0	0	0	676.283	1	1	47.2035	39.0357
DATA	2141	26	16	0	0	A_64_P108575	ENSRNOT00000046600	10272.4	366.573	5.233548e+001	6.346215e+000	114	39	9.262771e+000	0	0	0	0	0	0	44.4792	1	1	57.5363	38.7949
DATA	2142	26	17	0	0	A_64_P136859	NM_001109642	10297.6	366.87	6.626574e+003	6.626671e+002	5573	38	1.104930e+001	0	0	0	0	0	0	5646.54	1	1	46.8651	40
DATA	2143	26	18	0	0	A_64_P021597	A_64_P021597	10323	366.548	4.667690e+000	3.600259e+000	72.5	37	7.513715e+000	0	0	0	0	0	0	3.9888	1	0	48.5334	37.5484
DATA	2144	26	19	0	0	A_64_P148032	A_64_P148032	10347.9	366.984	1.799355e+002	1.834210e+001	223	38	8.319035e+000	0	0	0	0	0	0	154.244	1	1	45.835	37.7778
DATA	2145	26	20	0	0	A_42_P743580	NM_017214	10373.5	366.738	3.558312e+003	3.558489e+002	3134	34	8.235332e+000	0	0	0	0	0	0	3060.63	1	1	50.7771	35.8
DATA	2146	26	21	0	0	A_42_P693964	NM_181087	10399.2	367	2.724918e+003	2.725147e+002	2409	39	9.620125e+000	0	0	0	0	0	0	2352.4	1	1	45.4864	39.7586
DATA	2147	26	22	0	0	A_44_P1058389	NM_012992	10424.7	367.167	1.352240e+004	1.352245e+003	11150	70	3.075266e+001	0	0	0	0	1	0	11718.6	1	1	45.835	72.625
DATA	2148	26	23	0	0	A_44_P135224	NM_022187	10449.9	366.614	1.549305e+002	1.588490e+001	198	40	1.139336e+001	0	0	0	0	0	0	134.791	1	1	65	38.9394
DATA	2149	26	24	0	0	A_64_P070249	ENSRNOT00000048236	10475.3	367.313	8.440859e+002	8.448079e+001	785.5	39	1.012657e+001	0	0	0	0	0	0	737.437	1	1	45.835	40.8788
DATA	2150	26	25	0	0	A_42_P806899	NM_001108829	10500.5	366.931	4.237575e+001	5.481548e+000	106.5	35.5	7.602713e+000	0	0	0	0	0	0	37.1784	1	1	48.2044	35.6765
DATA	2151	26	26	0	0	A_42_P465144	NM_001107714	10526.2	366.785	1.139635e+002	1.191051e+001	171	37	9.608038e+000	0	0	0	0	0	0	100.431	1	1	45.4864	37.2424
DATA	2152	26	27	0	0	A_43_P19712	NM_001106751	10551.4	366.868	1.629034e+001	3.811896e+000	81.5	35.5	7.629344e+000	0	0	0	0	0	0	14.4203	1	0	46.5243	35
DATA	2153	26	28	0	0	A_42_P728472	NM_001007600	10577	367	8.538706e+003	8.538775e+002	7533	37	9.972623e+000	0	0	0	0	0	0	7593.65	1	1	46.8651	38.1034
DATA	2154	26	29	66	-1	(-)3xSLv1	NegativeControl	10601.8	367.028	3.426865e+000	3.414713e+000	62.5	37	1.001998e+001	0	0	0	0	0	0	-6.08673	0	0	46.8651	36.6
DATA	2155	26	30	0	0	A_42_P629394	NM_031683	10627.8	367.194	3.136252e+003	3.136436e+002	2901	36	7.965154e+000	0	0	0	0	0	0	2815.42	1	1	47.5395	35.2667
DATA	2156	26	31	0	0	A_64_P041977	A_64_P041977	10653.1	367.065	5.382621e+001	6.357082e+000	115	36	1.114081e+001	0	0	0	0	0	0	48.5485	1	1	54.4085	37.9412
DATA	2157	26	32	0	0	A_44_P126406	XM_228958	10678.4	367.219	7.723544e+003	7.723617e+002	7160	37	9.611105e+000	0	0	0	0	0	0	6999.39	1	1	44.7812	39.04
DATA	2158	26	33	0	0	A_64_P021878	NM_001167664	10703.9	367.058	5.282803e+001	6.255553e+000	118	33.5	8.114412e+000	0	0	0	0	0	0	48.1044	1	1	46.8651	35.5333
DATA	2159	26	34	0	0	A_64_P058719	NM_001014175	10729.2	366.879	7.036115e+003	7.036194e+002	6435	33	8.689025e+000	0	0	0	0	0	0	6437.31	1	1	43.3362	36.0286
DATA	2160	26	35	0	0	A_42_P495579	NM_001107564	10754.7	367.1	5.318777e+002	5.329120e+001	534.5	41	9.423600e+000	0	0	0	0	0	0	488.931	1	1	47.2035	39.7143
DATA	2161	26	36	0	0	A_64_P054979	NM_001109615	10779.9	366.825	7.594593e+001	8.281880e+000	137	36	7.135990e+000	0	0	0	0	0	0	70.1377	1	1	45.4864	35.7879
DATA	2162	26	37	0	0	A_44_P713838	ENSRNOT00000032874	10805.6	366.944	1.315123e+002	1.355600e+001	193	37	1.049670e+001	0	0	0	0	0	0	122.024	1	1	48.2044	37.2258
DATA	2163	26	38	0	0	A_64_P158913	NM_001108101	10830.6	367.427	1.793505e+001	3.732274e+000	85	40	1.267088e+001	0	0	0	0	0	0	16.7161	1	1	57.5363	43.3636
DATA	2164	26	39	0	0	A_43_P13018	NM_054004	10856.2	367.379	1.679212e+004	1.679215e+003	15411	45	1.082398e+001	0	0	0	0	0	0	15721.4	1	1	45.4864	45.4118
DATA	2165	26	40	0	0	A_64_P114383	A_64_P114383	10881.4	367.284	2.101510e+004	2.101513e+003	19645	39	1.144090e+001	0	0	0	0	0	0	19760.4	1	1	46.5243	41.4138
DATA	2166	26	41	0	0	A_43_P16629	XM_001080634	10906.9	366.825	6.406544e+003	6.406625e+002	5853.5	42.5	1.388137e+001	0	0	0	0	0	0	6049.61	1	1	45.4864	43.2188
DATA	2167	26	42	0	0	A_42_P810313	NM_001108677	10932.4	367.427	1.199387e+002	1.241786e+001	185.5	42	6.164267e+000	0	0	0	0	0	0	113.73	1	1	57.5363	41.4583
DATA	2168	26	43	0	0	A_42_P537516	NM_001106023	10957.9	367.104	1.404240e+004	1.404244e+003	13189	40	7.388915e+000	0	0	0	0	0	0	13368.5	1	1	46.8651	39.8966
DATA	2169	26	44	0	0	A_64_P006964	A_64_P006964	10983.4	367.427	1.668868e+002	1.699121e+001	233	42	8.990471e+000	0	0	0	0	0	0	159.494	1	1	57.5363	41.7714
DATA	2170	26	45	0	0	A_42_P829251	NM_133381	11008.6	367.427	2.057121e+001	3.787777e+000	89	36.5	1.125463e+001	0	0	0	0	0	0	19.7314	1	1	57.5363	40
DATA	2171	26	46	0	0	A_42_P687443	NM_020100	11034	367.455	1.600199e+002	1.631283e+001	222	42.5	6.958745e+000	0	0	0	0	0	0	154.025	1	1	55.8519	41.3
DATA	2172	26	47	0	0	A_44_P196146	NM_031349	11059.1	367.394	1.564640e+002	1.596212e+001	223	40	8.854721e+000	0	0	0	0	0	0	151.096	1	1	47.5395	39.5357
DATA	2173	26	48	0	0	A_64_P050137	ENSRNOT00000058586	11084.5	367.5	2.392916e+002	2.413549e+001	308	42	7.675209e+000	0	0	0	0	0	0	231.804	1	1	49.1849	42.7037
DATA	2174	26	49	0	0	A_44_P637827	NM_001108797	11110.6	367.324	4.361778e+003	4.361891e+002	4197	44	1.147713e+001	0	0	0	0	0	0	4237.85	1	1	48.2044	43.2692
DATA	2175	26	50	0	0	A_64_P070073	NM_001109590	11135.5	367.5	1.632816e+002	1.662575e+001	228	38	1.007274e+001	0	0	0	0	0	0	159.064	1	1	57.5363	38.72
DATA	2176	26	51	0	0	A_64_P130572	NM_001109400	11160.8	367.443	1.658643e+003	1.658937e+002	1700	36	9.236887e+000	0	0	0	0	0	0	1619.76	1	1	50.7771	38.1515
DATA	2177	26	52	0	0	A_42_P658815	NM_198745	11186.2	367.371	1.504844e+003	1.505166e+002	1572	38	1.084199e+001	0	0	0	0	0	0	1472.84	1	1	44.0646	39.7
DATA	2179	26	54	0	0	A_43_P14809	TC581403	11236.9	367.671	1.825218e+003	1.825482e+002	1875	42	1.223232e+001	0	0	0	0	0	0	1793.09	1	1	46.8651	41
DATA	2180	26	55	0	0	A_42_P553319	TC597248	11262.4	367.794	1.090826e+002	1.134039e+001	181	35.5	8.442345e+000	0	0	0	0	0	0	107.322	1	1	46.8651	36.7813
DATA	2181	26	56	0	0	A_64_P004162	NM_019139	11288.1	367.208	1.043819e+001	3.268250e+000	78.5	34.5	7.081254e+000	0	0	0	0	0	0	10.2817	1	0	49.5074	37.2813
DATA	2182	26	57	0	0	A_64_P032450	NM_172330	11313	367.086	1.978948e+002	2.002993e+001	268	40	9.577812e+000	0	0	0	0	0	0	195.103	1	1	43.3362	38.7
DATA	2183	26	58	0	0	A_44_P470976	NM_001013133	11338.6	367.573	4.530279e+001	5.484979e+000	115.5	42	1.021168e+001	0	0	0	0	0	0	44.6944	1	1	57.5363	40.7241
DATA	2184	26	59	0	0	A_64_P166428	NM_001037205	11364.1	367.523	1.417539e+002	1.450850e+001	213	43.5	1.026460e+001	0	0	0	0	0	0	139.899	1	1	55.8519	41.5
DATA	2185	26	60	0	0	A_43_P11576	NM_012821	11389.4	367.573	1.287718e+001	3.348435e+000	84.5	41	9.249019e+000	0	0	0	0	0	0	12.7094	1	0	57.5363	41.0625
DATA	2186	26	61	0	0	A_64_P156910	A_64_P156910	11414.6	367.573	2.151279e+002	2.173382e+001	285	39.5	1.156325e+001	0	0	0	0	0	0	212.273	1	1	57.5363	39.9688
DATA	2187	26	62	0	0	A_64_P126140	NM_001191648	11440.4	367.573	6.469517e+001	7.171052e+000	137	39	1.067166e+001	0	0	0	0	0	0	63.8005	1	1	57.5363	42.2069
DATA	2188	26	63	0	0	A_42_P637122	NM_001108351	11465.6	368	4.108626e+003	4.108742e+002	4043	34.5	7.249063e+000	0	0	0	0	0	0	4048.45	1	1	45.4864	36.125
DATA	2189	26	64	0	0	A_64_P081208	NM_001009712	11490.9	368.273	1.227885e+004	1.227888e+003	12260.5	38.5	1.139352e+001	0	0	0	0	0	0	12085	1	1	45.835	40.8421
DATA	2190	26	65	0	0	A_42_P465608	NM_130894	11516.1	367.896	3.579295e+003	3.579430e+002	3571	38.5	8.311742e+000	0	0	0	0	0	0	3517.39	1	1	46.8651	38.4667
DATA	2191	26	66	0	0	A_42_P485589	NM_017246	11541.6	367.573	1.415339e+002	1.449109e+001	212	40	1.127595e+001	0	0	0	0	0	0	138.825	1	1	57.5363	39.2703
DATA	2192	26	67	0	0	A_64_P031383	NM_020308	11567.4	367.9	2.960522e+002	2.976885e+001	358	28	6.906685e+000	0	0	0	0	1	0	289.754	1	1	46.8651	28.4333
DATA	2193	26	68	0	0	A_44_P220647	NM_001107097	11592.5	367.648	8.648545e+001	9.195747e+000	156	27	1.004816e+001	0	0	0	0	1	0	84.433	1	1	57.5363	30.5862
DATA	2194	26	69	0	0	A_44_P294687	NM_080885	11618.3	368	2.911278e+002	2.928096e+001	358	31	1.177894e+001	0	0	0	0	0	0	283.408	1	1	46.5243	34.08
DATA	2195	26	70	0	0	A_42_P512838	NM_001106884	11643.2	368.179	1.068306e+003	1.068768e+002	1085	38	1.056132e+001	0	0	0	0	0	0	1036.74	1	1	46.1809	37.1
DATA	2196	26	71	0	0	A_42_P635228	NM_001107651	11669.5	368.509	1.556760e+002	1.588408e+001	214	36	1.485192e+001	0	0	0	1	0	0	150.529	1	1	40.6843	39.2727
DATA	2197	26	72	0	0	A_44_P254687	NM_001105728	11693.9	368.069	2.079995e+002	2.103966e+001	272	34	1.160682e+001	0	0	0	0	0	0	200.361	1	1	46.8651	35.4194
DATA	2198	26	73	0	0	A_64_P049628	NM_001169145	11719.5	367.87	6.776061e+003	6.776136e+002	6496	34	8.495029e+000	0	0	0	0	0	0	6499.33	1	1	47.2035	35.2
DATA	2199	26	74	0	0	A_64_P007703	NM_031674	11745	368	9.303052e+001	9.836458e+000	166	37	8.207261e+000	0	0	0	0	0	0	88.8227	1	1	54.9904	38.6774
DATA	2200	26	75	0	0	A_42_P645376	NM_001014135	11770.5	368	3.073787e+004	3.073788e+003	28894	44	1.044904e+001	0	0	0	0	0	0	29202.4	1	1	54.1152	42.5185
DATA	2201	26	76	0	0	A_64_P040920	XM_577408	11795.2	367.907	4.663294e+003	4.663406e+002	4690	36	9.033054e+000	0	0	0	0	0	0	4407.55	1	1	48.2044	36.1034
DATA	2202	26	77	0	0	A_42_P819656	NM_130409	11820.7	368	3.658003e+003	3.658147e+002	3451.5	39.5	9.379519e+000	0	0	0	0	0	0	3437.94	1	1	50.4627	39.1538
DATA	2203	26	78	0	0	A_64_P018921	NM_001135012	11846.2	367.884	5.685272e+002	5.694643e+001	606	42	8.011199e+000	0	0	0	0	0	0	531.106	1	1	46.5243	42.4
DATA	2204	26	79	0	0	A_43_P15253	NM_012967	11872	368.557	6.411467e+002	6.419884e+001	653	34	1.108704e+001	0	0	0	0	0	0	595.157	1	1	43.7019	38.7879
DATA	2205	26	80	0	0	A_64_P093063	NM_001136272	11897.1	368.104	4.100055e+002	4.113381e+001	458	36	1.035410e+001	0	0	0	0	0	0	378.061	1	1	46.8651	39.2041
DATA	2206	26	81	0	0	A_44_P477406	NM_012751	11922.4	367.91	2.648585e+002	2.669460e+001	323	41	1.041873e+001	0	0	0	0	0	0	242.505	1	1	46.1809	41.3704
DATA	2207	26	82	0	0	A_64_P056816	NM_001100697	11948.1	368.386	1.129695e+002	1.178508e+001	175.5	43	7.228251e+000	0	0	0	0	0	0	102.672	1	1	65	42.0476
DATA	2208	26	83	0	0	A_42_P580733	NM_001006981	11973.1	368.064	6.229171e+003	6.229263e+002	5683	35	8.128130e+000	0	0	0	0	0	0	5617.96	1	1	49.1849	35.931
DATA	2209	26	84	66	1	DarkCorner	DarkCorner	11998.2	368.254	3.421720e+000	3.409586e+000	72	35.5	8.221922e+000	0	0	0	0	0	0	-2.91316	0	0	46.1809	36
DATA	2210	26	85	66	1	DarkCorner	DarkCorner	12024	368.11	3.451253e+000	3.439014e+000	70	30	7.064926e+000	0	0	0	0	1	0	-3.25556	0	0	46.8651	30.7561
DATA	2211	27	1	66	1	DarkCorner	DarkCorner	9878.58	373.573	3.558842e+000	3.546222e+000	64.5	34	8.232838e+000	0	0	0	0	0	0	-0.983235	0	0	57.5363	34.0489
DATA	2212	27	2	66	1	DarkCorner	DarkCorner	9904	373.545	3.575394e+000	3.562715e+000	65	39	1.166843e+001	0	0	0	0	0	0	-0.73461	0	0	55.8519	39.9063
DATA	2213	27	3	0	0	A_44_P289922	NM_139103	9929.17	373.857	5.945459e+002	5.956209e+001	566	37	1.045263e+001	0	0	0	0	0	0	507.086	1	1	46.8651	38.5152
DATA	2214	27	4	0	0	A_64_P117149	ENSRNOT00000065538	9954.48	373.831	5.524455e+000	3.631124e+000	71.5	39.5	8.750698e+000	0	0	0	0	0	0	4.69599	1	0	45.1352	40.3333
DATA	2215	27	5	0	0	A_42_P524308	NM_019213	9980.42	373.573	1.015904e+003	1.016541e+002	904	39	9.191885e+000	0	0	0	0	0	0	861.11	1	1	57.5363	40.25
DATA	2216	27	6	0	0	A_64_P037562	XM_001070892	10005.2	374.09	3.039474e+002	3.060799e+001	326.5	35.5	8.437645e+000	0	0	0	0	0	0	257.086	1	1	46.1809	35.9231
DATA	2217	27	7	0	0	A_44_P267706	XR_085883	10031.1	373.614	1.179894e+001	3.800662e+000	76	34	8.364563e+000	0	0	0	0	0	0	9.96283	1	0	57.259	35.8182
DATA	2218	27	8	0	0	A_64_P082569	XM_001053354	10056.5	373.648	3.969476e+000	3.638688e+000	69.5	41	9.337513e+000	0	0	0	0	0	0	3.34797	1	0	57.5363	40.3214
DATA	2219	27	9	0	0	A_64_P000539	NM_053930	10081.6	373.857	1.840176e+004	1.840180e+003	15055	42	9.193263e+000	0	0	0	0	0	0	15510.9	1	1	47.5395	40.6333
DATA	2220	27	10	0	0	A_43_P22124	NM_213625	10107.1	373.789	1.175813e+003	1.176370e+002	1020	37	8.391293e+000	0	0	0	0	0	0	990.92	1	1	47.2035	39
DATA	2221	27	11	0	0	A_44_P1012556	NM_001013988	10132.5	373.781	1.746547e+002	1.783644e+001	208.5	37.5	1.067299e+001	0	0	0	0	0	0	147.231	1	1	48.2044	36.4667
DATA	2222	27	12	0	0	A_64_P115457	NM_001106361	10158	374	1.144910e+002	1.200664e+001	165	38.5	1.174210e+001	0	0	0	0	0	0	96.5832	1	1	54.9904	38.6071
DATA	2223	27	13	0	0	A_64_P064229	A_64_P064229	10183.5	374	1.627589e+001	3.962024e+000	82	39.5	1.109812e+001	0	0	0	0	0	0	13.7454	1	0	54.1152	40.8438
DATA	2224	27	14	0	0	A_64_P039066	ENSRNOT00000041345	10208.4	374.072	5.732594e+001	6.772995e+000	116	35	6.364747e+000	0	0	0	0	0	0	48.4833	1	1	46.5243	35.52
DATA	2225	27	15	0	0	A_42_P574960	ENSRNOT00000068719	10233.8	374.103	9.612696e+002	9.619437e+001	870	39	8.906126e+000	0	0	0	0	0	0	814.485	1	1	46.5243	38.6296
DATA	2226	27	16	0	0	A_42_P600215	NM_175844	10259.1	374.015	3.899333e+001	5.302107e+000	99	34.5	1.013976e+001	0	0	0	0	0	0	33.1102	1	1	45.835	37.575
DATA	2227	27	17	0	0	A_42_P607770	NM_001134616	10284.9	373.896	8.914563e+003	8.914635e+002	7408	39	9.938876e+000	0	0	0	0	0	0	7588.55	1	1	46.8651	40.1563
DATA	2228	27	18	0	0	A_64_P003348	NM_001077660	10310.1	373.899	5.900982e+002	5.911795e+001	573	37	1.016033e+001	0	0	0	0	0	0	503.7	1	1	46.8651	38.9677
DATA	2229	27	19	0	0	A_64_P057828	A_64_P057828	10335.3	373.882	1.411191e+003	1.411641e+002	1274	38	8.557149e+000	0	0	0	0	0	0	1208.2	1	1	48.8603	37.4688
DATA	2230	27	20	0	0	A_64_P081765	NM_134355	10361.1	374.386	4.260655e+001	5.546575e+000	105	37	7.771597e+000	0	0	0	0	0	0	36.6007	1	1	57.259	38.0909
DATA	2231	27	21	0	0	A_42_P758886	NM_019258	10385.9	373.915	2.983482e+002	3.004401e+001	334	35.5	8.153208e+000	0	0	0	0	0	0	257.164	1	1	44.0646	37.0938
DATA	2232	27	22	0	0	A_42_P745470	XM_001066818	10411.8	374.176	9.390309e+003	9.390375e+002	8091.5	42	2.483459e+001	0	0	0	0	1	0	8124.9	1	1	48.2044	53.2188
DATA	2233	27	23	0	0	A_42_P800949	NM_031787	10436.8	374.082	3.099067e+002	3.118906e+001	340	44	2.858480e+001	0	0	0	0	1	0	269.177	1	1	46.8651	54.1818
DATA	2234	27	24	0	0	A_42_P738559	NM_012801	10462.8	374.212	1.901658e+004	1.901661e+003	16163	41	9.989887e+000	0	0	0	0	0	0	16586.2	1	1	45.835	42.2581
DATA	2235	27	25	0	0	A_42_P749550	NM_001109359	10488	373.774	4.636187e+003	4.636317e+002	4048	38	7.917563e+000	0	0	0	0	0	0	4060.54	1	1	45.4864	37.6341
DATA	2236	27	26	0	0	A_64_P007493	ENSRNOT00000006658	10513.2	374.063	1.953158e+001	3.980253e+000	87	38.5	8.343858e+000	0	0	0	0	0	0	17.1807	1	1	45.835	37.8438
DATA	2237	27	27	0	0	A_64_P056182	NM_053363	10538.7	374.373	2.487178e+003	2.487417e+002	2226	35	8.451244e+000	0	0	0	0	0	0	2197.7	1	1	46.1809	35.4
DATA	2238	27	28	0	0	A_42_P818546	NM_001191600	10564.2	373.909	7.489966e+002	7.497847e+001	737.5	39	1.014619e+001	0	0	0	0	0	0	664.829	1	1	45.835	40.4848
DATA	2239	27	29	0	0	A_44_P407948	XM_001055260	10589.4	373.97	9.004675e+001	9.632645e+000	149	34.5	1.105230e+001	0	0	0	0	0	0	80.2971	1	1	45.4864	37.2941
DATA	2240	27	30	66	-1	(-)3xSLv1	NegativeControl	10615	374.455	1.877475e+001	3.888176e+000	85	37	9.201936e+000	0	0	0	1	0	0	16.8217	1	1	55.8519	36.9714
DATA	2241	27	31	0	0	A_64_P044505	NM_031587	10640.4	374.37	3.182763e+002	3.200753e+001	349	31	5.970357e+000	0	0	0	0	0	0	286.517	1	1	48.2044	32.3871
DATA	2242	27	32	0	0	A_42_P685138	NM_153621	10665.9	374.5	6.150098e+002	6.159338e+001	599.5	40.5	1.289890e+001	0	0	0	0	0	0	556.297	1	1	49.8279	42.6923
DATA	2243	27	33	0	0	A_64_P121747	ENSRNOT00000050332	10690.5	374.243	8.073271e+000	3.452835e+000	75	36	1.055146e+001	0	0	0	0	0	0	7.33626	1	0	47.2035	37.4444
DATA	2244	27	34	0	0	A_42_P791436	NM_012750	10716.4	374.239	1.273245e+003	1.273683e+002	1204	34.5	1.058739e+001	0	0	0	0	0	0	1162.65	1	1	46.5243	38.3125
DATA	2245	27	35	0	0	A_44_P349309	NM_001100890	10742.2	374.529	3.638424e+002	3.653583e+001	397	39	6.354407e+000	0	0	0	0	0	0	333.846	1	1	47.5395	38.3871
DATA	2246	27	36	0	0	A_42_P502621	NM_024401	10767.3	374.535	7.472975e+001	8.172934e+000	139	36	7.761111e+000	0	0	0	0	0	0	68.889	1	1	47.8731	36.2121
DATA	2247	27	37	0	0	A_43_P21574	NM_001012043	10792.6	375.063	9.535335e+001	1.008822e+001	157	36.5	6.162697e+000	0	0	0	0	0	0	88.3126	1	1	45.1352	36.8571
DATA	2248	27	38	0	0	A_44_P496331	NM_001001085	10818.1	374.767	8.001939e+001	8.647650e+000	142.5	36.5	1.047749e+001	0	0	0	0	0	0	74.4505	1	1	47.8731	37.7778
DATA	2249	27	39	0	0	A_64_P016503	ENSRNOT00000003659	10843.5	374.5	1.071611e+002	1.120221e+001	173	37	1.252290e+001	0	0	0	0	0	0	100.153	1	1	57.5363	41.9333
DATA	2250	27	40	0	0	A_43_P13270	NM_134415	10868.9	374.611	2.498943e+004	2.498945e+003	22973.5	40.5	1.047719e+001	0	0	0	0	0	0	23458.8	1	1	48.2044	43.3333
DATA	2251	27	41	0	0	A_42_P553960	NM_001107831	10894.4	374.479	9.850566e+003	9.850619e+002	9007	42	1.231308e+001	0	0	0	0	0	0	9287.21	1	1	48.2044	42.5313
DATA	2252	27	42	0	0	A_44_P428997	NM_001107661	10919.9	374.362	4.323017e+002	4.335009e+001	469	44	6.856712e+000	0	0	0	0	0	0	409.292	1	1	46.5243	44.8333
DATA	2253	27	43	0	0	A_42_P619926	NM_001106578	10945.1	374.5	2.586059e+002	2.605896e+001	309.5	39.5	7.928434e+000	0	0	0	0	0	0	245.83	1	1	56.9804	39.5588
DATA	2255	27	45	0	0	A_44_P524471	NM_001106408	10996	374.574	8.690519e+002	8.696352e+001	883	40.5	1.067641e+001	0	0	0	0	0	0	832.495	1	1	46.5243	41.4737
DATA	2256	27	46	0	0	A_43_P10009	XM_347035	11021.3	374.627	7.304054e+003	7.304123e+002	6923	39	8.552360e+000	0	0	0	0	0	0	7021.78	1	1	46.1809	41
DATA	2257	27	47	0	0	A_64_P068112	A_64_P068112	11046.6	374.929	4.971523e+003	4.971623e+002	5329	41	8.087222e+000	0	0	0	0	0	0	4795.75	1	1	42.5954	38.3043
DATA	2258	27	48	0	0	A_44_P191715	NM_021666	11072.3	374.532	1.076699e+001	3.331065e+000	79	37	9.163131e+000	0	0	0	0	0	0	10.42	1	0	50.4627	37.5
DATA	2259	27	49	0	0	A_64_P035769	NM_001108962	11097.3	374.557	1.647317e+003	1.647617e+002	1667	43	7.685880e+000	0	0	0	0	0	0	1598.97	1	1	47.5395	42.9643
DATA	2260	27	50	0	0	A_64_P158469	XM_579990	11122.6	374.573	3.056757e+001	4.377966e+000	100	39	8.210184e+000	0	0	0	0	0	0	29.7533	1	1	57.5363	38.9565
DATA	2261	27	51	0	0	A_43_P12811	NM_053464	11148.6	374.708	2.177685e+003	2.177909e+002	2190	37.5	7.833101e+000	0	0	0	0	0	0	2125.32	1	1	48.2044	37.4333
DATA	2262	27	52	0	0	A_44_P370694	NM_001107961	11173.3	374.449	2.253692e+001	3.847796e+000	93	35	1.035885e+001	0	0	0	0	0	0	22.0451	1	1	47.5395	37.7895
DATA	2263	27	53	0	0	A_42_P749550	NM_001109359	11199.1	374.713	4.752401e+003	4.752503e+002	4702	40	1.164846e+001	0	0	0	0	0	0	4658.75	1	1	52.9257	41.425
DATA	2264	27	54	0	0	A_64_P125893	ENSRNOT00000021391	11224.5	374.849	1.723183e+004	1.723186e+003	16906	46	1.090140e+001	0	0	0	0	0	0	16924.1	1	1	47.8731	46.0741
DATA	2265	27	55	0	0	A_44_P1000653	NM_031531	11249.1	375.29	1.093815e+002	1.136928e+001	181	37	1.118904e+001	0	0	0	0	0	0	107.6	1	1	45.1352	39.1379
DATA	2266	27	56	0	0	A_64_P035992	A_64_P035992	11274.9	374.969	4.368457e+002	4.379421e+001	535	35.5	6.794475e+000	0	0	0	0	0	0	430.31	1	1	45.835	37.3235
DATA	2267	27	57	0	0	A_42_P592385	NM_022935	11300.4	374.803	9.592419e+000	3.238982e+000	78	36	7.602858e+000	0	0	0	0	0	0	9.45901	1	0	46.1809	36.3
DATA	2268	27	58	0	0	A_64_P065624	ENSRNOT00000039260	11326	375	1.638540e+001	3.498573e+000	86	42	8.618189e+000	0	0	0	0	0	0	16.1707	1	1	54.9904	39.7188
DATA	2269	27	59	0	1	ERCC-00097_63	ERCC-00097_63	11351	374.458	3.942062e+001	5.008623e+000	108.5	42	9.687729e+000	0	0	0	0	0	0	38.922	1	1	43.7019	40.0286
DATA	2270	27	60	0	0	A_42_P477625	NM_001108719	11376.7	374.914	5.008930e+003	5.009026e+002	5068	45	9.832210e+000	0	0	0	0	0	0	4946.86	1	1	49.5074	42.1212
DATA	2271	27	61	0	0	A_42_P788030	NM_031618	11402.5	375	2.939525e+004	2.939526e+003	29069	40	8.071428e+000	0	0	0	0	0	0	29028.8	1	1	54.1152	39.9412
DATA	2272	27	62	0	0	A_44_P278247	XM_219377	11427.4	375.084	9.122915e+003	9.122967e+002	8806	39	9.268721e+000	0	0	0	0	0	0	9005.82	1	1	49.8279	39.7667
DATA	2273	27	63	0	0	A_44_P189262	NM_024000	11452.8	375.026	1.806298e+004	1.806301e+003	17770.5	39.5	1.001207e+001	0	0	0	0	0	0	17818.6	1	1	49.1849	41.8077
DATA	2274	27	64	0	0	A_44_P212850	NM_019305	11477.8	375.39	5.081731e+001	5.950281e+000	122	36	1.109410e+001	0	0	0	0	0	0	50.0818	1	1	48.8603	39.4571
DATA	2275	27	65	0	0	A_64_P144278	NM_001106525	11503.9	374.813	1.045586e+004	1.045591e+003	10464	43.5	9.151722e+000	0	0	0	0	0	0	10289.9	1	1	45.4864	42.9412
DATA	2276	27	66	0	0	A_44_P683816	NM_001127488	11528.9	374.857	2.826170e+002	2.843174e+001	355.5	39	1.011758e+001	0	0	0	0	0	0	277.678	1	1	45.4864	39.9362
DATA	2277	27	67	0	0	A_64_P048712	A_64_P048712	11554.6	374.736	1.111974e+002	1.154678e+001	176.5	32	1.179402e+001	0	0	0	0	0	0	109.033	1	1	41.0736	35.0667
DATA	2278	27	68	0	0	A_64_P012813	NM_001106456	11579.9	375.386	8.977147e+001	9.503285e+000	146	28.5	9.914429e+000	0	0	0	0	1	0	87.8265	1	1	57.259	30.6471
DATA	2280	27	70	0	0	A_42_P598602	NM_001077646	11630.6	375.427	1.416423e+002	1.450720e+001	204	40	1.425805e+001	0	0	0	1	0	0	137.795	1	1	57.5363	40.65
DATA	2281	27	71	0	0	A_44_P375380	NM_001191572	11655.7	375.129	1.886463e+002	1.912520e+001	248	40	1.586919e+001	0	0	0	0	0	0	182.912	1	1	47.2035	41.4359
DATA	2282	27	72	0	0	A_64_P113555	NM_001000025	11681.4	375.427	9.205014e+001	9.731643e+000	144.5	35	1.108858e+001	0	0	0	0	0	0	88.9228	1	1	57.5363	38
DATA	2283	27	73	0	0	A_42_P590466	NM_001009676	11707	374.855	3.247025e+003	3.247180e+002	3207	33.5	1.037814e+001	0	0	0	0	0	0	3123.77	1	1	45.4864	34.1333
DATA	2284	27	74	0	0	A_44_P224987	XM_001058317	11731.9	375.044	5.143263e+001	6.049354e+000	123	38	9.605389e+000	0	0	0	0	0	0	49.2697	1	1	46.8651	39.7222
DATA	2285	27	75	0	0	A_42_P557315	NM_001106280	11757.4	375.179	5.558448e+003	5.558541e+002	5141	42	9.116650e+000	0	0	0	0	0	0	5299.55	1	1	46.5243	41.5517
DATA	2286	27	76	0	0	A_44_P375364	A_44_P375364	11783	375.455	5.159505e+001	6.079719e+000	120	38	1.083915e+001	0	0	0	0	0	0	48.9428	1	1	55.8519	38.7778
DATA	2287	27	77	0	0	A_44_P880152	NM_031553	11808.3	374.903	9.830202e+001	1.034840e+001	165	34	8.567610e+000	0	0	0	0	0	0	92.7389	1	1	44.7812	37.2414
DATA	2288	27	78	0	0	A_64_P057575	NM_001191967	11833.7	375.5	1.123309e+002	1.169438e+001	178	41	1.077822e+001	0	0	0	0	0	0	105.372	1	1	57.5363	41.2069
DATA	2289	27	79	0	0	A_64_P122183	ENSRNOT00000009823	11859.3	375.5	8.092682e+001	8.729241e+000	143	37	1.044611e+001	0	0	0	0	0	0	75.4446	1	1	57.5363	37.9394
DATA	2290	27	80	0	0	A_64_P057587	NM_019313	11883.7	373.827	4.499455e+002	4.511494e+001	541	33	1.090918e+001	0	0	0	0	0	0	416.751	1	1	39.4933	37.8889
DATA	2291	27	81	0	0	A_42_P480769	XM_001081609	11910	375.406	4.563639e+002	4.575671e+001	502	38	9.181169e+000	0	0	0	0	0	0	419.832	1	1	46.5243	38.4091
DATA	2292	27	82	0	0	A_42_P623151	NM_031026	11935.2	375.412	2.312377e+004	2.312379e+003	20659	43	1.266285e+001	0	0	0	0	0	0	21121.4	1	1	46.5243	45.4348
DATA	2293	27	83	0	0	A_42_P550241	NM_022954	11960.5	374.985	1.453421e+001	3.665695e+000	88	40.5	1.169122e+001	0	0	0	0	0	0	13.1755	1	0	47.2035	41.7308
DATA	2294	27	84	66	1	DarkCorner	DarkCorner	11986.2	375.194	3.404132e+000	3.392060e+000	70	37	8.197561e+000	0	0	0	0	0	0	-4.34805	0	0	46.1809	36.8
DATA	2295	27	85	66	1	DarkCorner	DarkCorner	12011	374.851	3.431826e+000	3.419656e+000	68.5	37.5	8.198655e+000	0	0	0	0	0	0	-4.91112	0	0	46.5243	37.75
DATA	2296	28	1	66	1	DarkCorner	DarkCorner	9891.5	381	3.567273e+000	3.554623e+000	59	38	9.755464e+000	0	0	0	0	0	0	-8.61476	0	0	54.1152	39.8261
DATA	2297	28	2	0	0	A_42_P802550	NM_017365	9916.5	381	4.673632e+002	4.687244e+001	454.5	43	1.446018e+001	0	0	0	0	0	0	399.415	1	1	48.5334	43.4074
DATA	2299	28	4	0	0	A_42_P619926	NM_001106578	9967.26	380.855	2.306765e+002	2.334588e+001	263	38.5	9.869017e+000	0	0	0	0	0	0	195.824	1	1	46.1809	40.2353
DATA	2300	28	5	0	0	A_64_P052441	ENSRNOT00000004876	9992.91	381.386	5.336457e+001	6.438610e+000	111	35	7.700549e+000	0	0	0	0	0	0	45.1901	1	1	57.259	36.5385
DATA	2301	28	6	0	0	A_64_P056823	CA510211	10018	381.098	1.443497e+001	3.887259e+000	78	38	9.167424e+000	0	0	0	0	0	0	12.2007	1	0	44.7812	38.3333
DATA	2302	28	7	0	0	A_42_P669870	NM_001011919	10043.7	381.1	3.334675e+003	3.334870e+002	2828.5	34	8.212990e+000	0	0	0	1	0	0	2814.63	1	1	47.2035	36.1034
DATA	2303	28	8	0	0	A_42_P683634	NM_012946	10069.1	381.386	5.346893e+004	5.346895e+003	44233.5	37	8.891104e+000	0	0	0	0	0	0	45091.9	1	1	57.259	37.8621
DATA	2304	28	9	0	0	A_42_P542809	NM_021671	10094.6	380.968	5.226027e+002	5.238542e+001	494	42	8.455699e+000	0	0	0	0	0	0	440.551	1	1	44.0646	41.4667
DATA	2305	28	10	0	0	A_64_P065887	ENSRNOT00000024693	10119.8	380.723	1.971663e+002	2.004594e+001	229.5	35	9.591663e+000	0	0	0	0	0	0	166.221	1	1	45.835	35.6667
DATA	2306	28	11	0	0	A_64_P043406	NM_001024902	10145.5	381	1.780501e+003	1.780868e+002	1487	38	1.086958e+001	0	0	0	0	0	0	1501.84	1	1	48.5334	37.0909
DATA	2307	28	12	0	0	A_64_P060769	NM_001191090	10170.5	380.985	1.630071e+003	1.630472e+002	1517	42	9.879570e+000	0	0	0	0	0	0	1376.2	1	1	44.4243	39.9655
DATA	2308	28	13	0	0	A_64_P150789	A_64_P150789	10195.9	381.342	1.098029e+001	3.772001e+000	76	34.5	5.837412e+000	0	0	0	0	0	0	9.28245	1	0	48.5334	34.3462
DATA	2309	28	14	0	0	A_64_P110254	NM_022404	10221.4	381.361	8.715409e+003	8.715484e+002	7327.5	43	1.022782e+001	0	0	0	0	0	0	7380.19	1	1	48.2044	40.5862
DATA	2310	28	15	0	0	A_42_P700753	FQ212883	10246.6	381.479	2.376579e+003	2.376851e+002	2095	32	9.129159e+000	0	0	0	0	0	0	2016.51	1	1	48.2044	36.3077
DATA	2311	28	16	0	0	A_42_P503768	NM_001009466	10272.1	381.324	3.707383e+002	3.724695e+001	377	34	7.950102e+000	0	0	0	0	0	0	315.306	1	1	48.8603	35.6579
DATA	2312	28	17	0	0	A_64_P106021	ENSRNOT00000017892	10297.2	380.921	1.202121e+002	1.254232e+001	171	36	7.305141e+000	0	0	0	0	0	0	102.502	1	1	45.4864	37.5714
DATA	2313	28	18	0	0	A_43_P10861	NM_001024879	10323	381.455	2.963349e+002	2.984741e+001	318	35	7.895536e+000	0	0	0	0	0	0	253.433	1	1	55.8519	35.1143
DATA	2314	28	19	0	0	A_44_P562251	BF545174	10348.2	381.309	1.001385e+002	1.062646e+001	149	35	7.697786e+000	0	0	0	0	0	0	85.9101	1	1	46.5243	36.5484
DATA	2315	28	20	0	0	A_42_P608768	ENSRNOT00000009898	10373.6	381.239	1.715625e+002	1.751844e+001	216	36	8.870547e+000	0	0	0	0	0	0	147.686	1	1	46.5243	37.9259
DATA	2316	28	21	0	0	A_64_P117115	NM_001109329	10399.3	381.5	1.909042e+001	4.013857e+000	84	38	7.964885e+000	0	0	0	0	0	0	16.4943	1	1	65	37.4242
DATA	2317	28	22	0	0	A_64_P043331	ENSRNOT00000032411	10424.5	381.5	1.396297e+002	1.439921e+001	189	44	2.966024e+001	0	0	0	0	1	0	121.099	1	1	57.5363	55.8333
DATA	2318	28	23	0	0	A_42_P664274	NM_001079705	10449.9	381.5	1.170529e+003	1.171053e+002	1074	40	8.807245e+000	0	0	0	0	0	0	1019.25	1	1	56.9804	38
DATA	2319	28	24	0	0	A_64_P044593	NM_001173451	10475.2	381.882	6.028448e+002	6.038536e+001	592.5	38.5	8.891364e+000	0	0	0	0	0	0	527.117	1	1	46.5243	40.0278
DATA	2320	28	25	0	0	A_64_P006978	NM_001109371	10500.8	381.449	4.077536e+001	5.356711e+000	104	37	6.703884e+000	0	0	0	0	0	0	35.8073	1	1	47.2035	37.0278
DATA	2321	28	26	0	0	A_64_P119390	NM_001109519	10526.3	381.5	2.372551e+001	4.194106e+000	88	36.5	9.728023e+000	0	0	0	0	0	0	20.9274	1	1	57.5363	37.5263
DATA	2322	28	27	0	0	A_64_P034714	A_64_P034714	10551.5	381.5	3.003010e+001	4.568701e+000	97	38	5.817236e+000	0	0	0	0	0	0	26.6072	1	1	57.5363	38.5667
DATA	2323	28	28	0	0	A_44_P535959	NM_001107650	10576.7	381.224	3.160034e+002	3.178568e+001	353	37	1.028658e+001	0	0	0	0	0	0	281.261	1	1	45.835	38.2703
DATA	2324	28	29	0	0	A_64_P286274	ENSRNOT00000055318	10602.1	381.87	2.352239e+002	2.376847e+001	282	38	1.082514e+001	0	0	0	0	0	0	210.351	1	1	46.8651	38.6061
DATA	2325	28	30	0	0	A_44_P333384	NM_001024788	10627.4	381.778	3.552597e+001	4.914227e+000	102	33	8.082244e+000	0	0	0	0	0	0	31.919	1	1	44.0646	33.5862
DATA	2326	28	31	0	0	A_42_P522194	NM_012914	10653	381.831	1.431899e+002	1.471232e+001	196	34.5	1.294739e+001	0	0	0	0	0	0	129.269	1	1	46.8651	38.2778
DATA	2327	28	32	0	0	A_44_P273859	NM_017021	10678.5	381.648	1.060040e+001	3.526177e+000	80	38	1.293659e+001	0	0	0	0	0	0	9.61566	1	0	57.5363	40.3462
DATA	2328	28	33	0	0	A_43_P11665	NM_013024	10703.6	381.821	9.156899e+001	9.749491e+000	155	35	7.283095e+000	0	0	0	0	0	0	83.4563	1	1	46.1809	35
DATA	2329	28	34	0	0	A_64_P118273	NM_001170593	10729.4	381.573	6.296857e+001	7.123676e+000	129	34.5	6.791539e+000	0	0	0	0	0	0	57.6669	1	1	57.5363	36.0625
DATA	2330	28	35	0	0	A_42_P762814	NM_031318	10754.5	381.735	4.375303e+003	4.375429e+002	3946	40.5	7.918430e+000	0	0	0	0	0	0	4025.72	1	1	46.5243	39.3077
DATA	2331	28	36	0	0	A_44_P384017	NM_031688	10779.9	382.085	5.713463e+002	5.722985e+001	599.5	38	7.945938e+000	0	0	0	0	0	0	528.174	1	1	44.0646	39.069
DATA	2332	28	37	0	0	A_64_P118872	A_64_P118872	10805.1	381.917	2.126490e+001	3.913151e+000	88	39.5	8.760937e+000	0	0	0	0	0	0	19.7483	1	1	46.8651	38.9333
DATA	2333	28	38	0	0	A_42_P599210	NM_001008326	10830.7	382.246	1.169222e+003	1.169679e+002	1148.5	36.5	1.137935e+001	0	0	0	0	0	0	1090.86	1	1	45.1352	38.4
DATA	2334	28	39	0	0	A_44_P305801	NM_001033894	10856.2	382.094	3.644160e+003	3.644305e+002	3404.5	36.5	1.122195e+001	0	0	0	0	0	0	3415.16	1	1	45.835	40.3529
DATA	2335	28	40	0	0	A_64_P085462	A_64_P085462	10881.5	381.648	6.063136e+004	6.063137e+003	57194	40	6.867500e+000	0	0	0	0	0	0	57067.4	1	1	57.5363	40.6552
DATA	2336	28	41	0	0	A_42_P488000	NM_001108479	10907	381.652	1.038354e+003	1.038855e+002	1033	42	1.155549e+001	0	0	0	0	0	0	981.5	1	1	45.4864	43
DATA	2337	28	42	0	0	A_42_P818546	NM_001191600	10932.4	381.742	7.682879e+002	7.689599e+001	798	41	6.867799e+000	0	0	0	0	0	0	729.225	1	1	46.1809	40.2
DATA	2338	28	43	0	0	A_44_P488489	TC610872	10957.9	381.896	1.209326e+003	1.209750e+002	1221	36	8.775883e+000	0	0	0	0	0	0	1152.47	1	1	46.8651	37.375
DATA	2339	28	44	0	0	A_64_P153971	A_64_P153971	10982.9	382	1.782649e+001	3.653513e+000	89	40.5	8.698111e+000	0	0	0	0	0	0	17.0526	1	1	49.1849	40
DATA	2340	28	45	0	0	A_64_P077985	NM_001170478	11008.8	381.843	4.851793e+001	5.799505e+000	117	40.5	9.189285e+000	0	0	0	0	0	0	46.586	1	1	46.8651	40.7353
DATA	2341	28	46	0	0	A_44_P576822	NM_080771	11033.9	381.896	1.109169e+003	1.109621e+002	1090	42	9.142826e+000	0	0	0	0	0	0	1068.7	1	1	46.8651	40.0357
DATA	2342	28	47	0	0	A_64_P134310	A_64_P134310	11059.6	382.154	7.630306e+001	8.257055e+000	147	37	1.023694e+001	0	0	0	0	0	0	73.767	1	1	44.7812	37.7778
DATA	2343	28	48	0	0	A_64_P134706	NM_001107533	11084.3	381.986	3.743043e+001	4.889534e+000	105.5	39.5	1.009007e+001	0	0	0	0	0	0	36.2963	1	1	47.2035	37
DATA	2344	28	49	0	0	A_42_P469751	XM_001054007	11110.2	381.882	2.248137e+003	2.248355e+002	2269	41	8.116444e+000	0	0	0	0	0	0	2186.49	1	1	46.5243	41.28
DATA	2345	28	50	0	0	A_64_P082653	ENSRNOT00000020906	11135.5	381.971	8.963598e+001	9.493771e+000	157	38	7.350390e+000	0	0	0	0	0	0	87.4141	1	1	47.2035	36.3125
DATA	2346	28	51	0	0	A_43_P18902	NM_001109221	11160.9	382.386	1.647579e+002	1.676867e+001	231.5	35	7.254831e+000	0	0	0	0	0	0	161.078	1	1	57.259	37.1515
DATA	2347	28	52	0	0	A_64_P086719	ENSRNOT00000065918	11186.4	382.427	1.954954e+001	3.676220e+000	88	36	1.130839e+001	0	0	0	0	0	0	19.1561	1	1	57.5363	39.2143
DATA	2348	28	53	0	0	A_64_P138585	TC587165	11211.8	381.821	5.291401e+003	5.291493e+002	5097	46	1.122776e+001	0	0	0	0	0	0	5195.04	1	1	46.1809	45
DATA	2349	28	54	0	0	A_64_P230444	ENSRNOT00000010282	11237.1	381.813	4.550843e+003	4.550948e+002	4529	44.5	9.252524e+000	0	0	0	0	0	0	4475.75	1	1	45.4864	43.3333
DATA	2350	28	55	0	0	A_64_P124427	TC642834	11262.2	382.058	9.317364e+001	9.818653e+000	164	37	9.130254e+000	0	0	0	0	0	0	91.7733	1	1	46.5243	38.1923
DATA	2351	28	56	0	0	A_42_P778587	NM_001135767	11287.7	382.261	3.555000e+002	3.568433e+001	414	34	6.767859e+000	0	0	0	0	0	0	350.592	1	1	47.2035	35.1176
DATA	2352	28	57	0	0	A_42_P526030	NM_057197	11313.1	381.844	7.944722e+003	7.944782e+002	7725.5	40.5	8.660984e+000	0	0	0	0	0	0	7842.24	1	1	45.4864	39.7667
DATA	2353	28	58	0	0	A_64_P022561	XM_001070923	11338.2	381.846	8.197727e+001	8.760218e+000	152.5	36	8.129282e+000	0	0	0	0	0	0	80.9733	1	1	45.835	37.9091
DATA	2354	28	59	0	0	A_64_P126226	NM_001105901	11364	382.455	1.320619e+002	1.356222e+001	203	43	1.150108e+001	0	0	0	0	0	0	130.502	1	1	55.8519	39.9459
DATA	2355	28	60	0	0	A_64_P089541	NM_001106214	11389.4	382.427	1.550727e+002	1.581152e+001	230	44	9.333266e+000	0	0	0	0	0	0	153.253	1	1	57.5363	42.7879
DATA	2356	28	61	0	0	A_44_P205869	NM_138891	11414.8	382.3	9.296982e+002	9.302108e+001	1009	40	7.247246e+000	0	0	0	0	0	0	918.578	1	1	47.2035	40.5484
DATA	2357	28	62	0	0	A_44_P491796	NM_012881	11440.4	382.427	1.811502e+002	1.837653e+001	251	39	9.489686e+000	0	0	0	0	0	0	178.89	1	1	57.5363	39.8519
DATA	2358	28	63	0	0	A_64_P132706	NM_001008304	11465.6	382.427	5.957712e+004	5.957713e+003	58192.5	40	9.100687e+000	0	0	0	0	0	0	58785.1	1	1	57.5363	41.1818
DATA	2359	28	64	0	0	A_64_P040715	NM_001011979	11491.2	382.171	1.160844e+003	1.161257e+002	1222	43	1.046064e+001	0	0	0	0	0	0	1144.05	1	1	46.8651	43.2703
DATA	2360	28	65	0	0	A_44_P191055	NM_001107693	11516.2	382.411	3.319647e+003	3.319792e+002	3263	41	8.124720e+000	0	0	0	0	0	0	3266.95	1	1	52.6241	41.5814
DATA	2361	28	66	0	0	A_64_P077493	XR_005942	11542.8	382.596	5.798487e+001	6.577822e+000	125.5	39	1.149677e+001	0	0	0	0	0	0	56.9574	1	1	41.0736	39.7805
DATA	2362	28	67	0	0	A_44_P317600	NM_012612	11567.2	382.481	3.628331e+002	3.641653e+001	431	30	7.867673e+000	0	0	0	0	1	0	355.668	1	1	49.8279	28.8519
DATA	2363	28	68	0	0	A_42_P751368	NM_001047874	11592.6	382.514	1.951742e+003	1.951992e+002	1967	31.5	1.027723e+001	0	0	0	0	0	0	1908.49	1	1	47.8731	33.9167
DATA	2364	28	69	0	0	A_42_P711568	NM_001107584	11618	382.5	7.207044e+003	7.207112e+002	7384	36	1.092788e+001	0	0	0	0	0	0	7027.6	1	1	48.5334	36.875
DATA	2365	28	70	0	0	A_64_P091817	A_64_P091817	11642.8	382.434	6.947382e+002	6.954466e+001	758	40	1.480544e+001	0	0	0	0	0	0	675.363	1	1	49.5074	41.375
DATA	2366	28	71	0	0	A_64_P006628	NM_172328	11668.6	382.573	1.140488e+002	1.183169e+001	177	41	1.758596e+001	0	0	0	0	0	0	110.479	1	1	57.5363	44.8621
DATA	2367	28	72	0	0	A_64_P057760	NM_001191643	11694	382.5	2.370101e+002	2.391092e+001	282.5	34	9.233503e+000	0	0	0	0	0	0	228.71	1	1	49.8279	33.4848
DATA	2368	28	73	0	0	A_44_P150013	NM_001134495	11719	382.463	3.185683e+000	3.174640e+000	72	34	6.565471e+000	0	0	0	0	0	0	0.386339	0	0	46.1809	33.5185
DATA	2369	28	74	0	0	A_44_P526975	NM_001002822	11744.9	382.5	1.918596e+002	1.944919e+001	255	40.5	9.548795e+000	0	0	0	0	0	0	183.536	1	1	56.9804	40.5
DATA	2370	28	75	66	-1	(-)3xSLv1	NegativeControl	11770.4	382.573	3.216030e+000	3.204625e+000	70	40	8.438074e+000	0	0	0	0	0	0	-3.27306	0	0	57.5363	37.625
DATA	2371	28	76	0	0	A_42_P648937	NM_001191732	11795.6	382.653	1.295140e+003	1.295540e+002	1278	37.5	9.830565e+000	0	0	0	0	0	0	1226.57	1	1	48.2044	38
DATA	2372	28	77	0	0	A_44_P533786	NM_053749	11821.1	382.5	3.520902e+001	4.784371e+000	106	36.5	1.052952e+001	0	0	0	0	0	0	33.158	1	1	56.9804	38.9118
DATA	2373	28	78	0	0	A_64_P156165	S68987	11846.3	382.639	6.114370e+003	6.114457e+002	5833	45	1.040332e+001	0	0	0	0	0	0	5724.66	1	1	51.0895	41.3333
DATA	2374	28	79	0	0	A_64_P084293	NM_001000525	11871.5	382.754	2.399796e+001	4.063039e+000	96	36	1.009556e+001	0	0	0	0	0	0	22.3294	1	1	46.1809	37.641
DATA	2375	28	80	0	0	A_42_P708569	NM_001191837	11897.1	383.081	9.913402e+003	9.913457e+002	9405.5	36	9.761620e+000	0	0	0	0	0	0	9163.22	1	1	45.1352	38.75
DATA	2376	28	81	0	0	A_64_P112215	NM_001110141	11922.6	382.573	3.844189e+002	3.858532e+001	428	38.5	9.304093e+000	0	0	0	0	0	0	352.828	1	1	57.5363	39.3846
DATA	2377	28	82	0	0	A_42_P567793	NM_001107668	11947.6	382.712	2.824611e+003	2.824809e+002	2640	43	1.341189e+001	0	0	0	0	0	0	2573.93	1	1	48.5334	44.5455
DATA	2378	28	83	0	0	A_42_P481087	XM_232226	11973.2	382.75	8.800944e+002	8.807408e+001	859.5	38	9.848954e+000	0	0	0	0	0	0	795.832	1	1	45.1352	38.5758
DATA	2379	28	84	66	1	DarkCorner	DarkCorner	11998.5	382.672	3.412722e+000	3.400620e+000	68	38	7.419685e+000	0	0	0	0	0	0	-6.04004	0	0	43.3362	37.1379
DATA	2380	28	85	66	1	DarkCorner	DarkCorner	12024.3	382.413	3.441980e+000	3.429774e+000	71	32	8.080551e+000	0	0	0	0	0	0	-4.23073	0	0	48.8603	32.3109
DATA	2381	29	1	66	1	DarkCorner	DarkCorner	9878.11	388.169	3.558041e+000	3.545423e+000	63.5	33	8.345102e+000	0	0	0	0	0	0	-3.65497	0	0	46.8651	33.5607
DATA	2382	29	2	66	1	DarkCorner	DarkCorner	9904	388.455	3.574688e+000	3.562011e+000	59	40	1.044694e+001	0	0	0	0	0	0	-7.38473	0	0	55.8519	40.7
DATA	2383	29	3	0	0	A_64_P096512	NM_031782	9929.31	388.338	1.431444e+004	1.431449e+003	11721.5	39	1.419454e+001	0	0	0	0	0	0	12211.5	1	1	48.5334	42.1212
DATA	2384	29	4	0	0	A_44_P172814	NM_173102	9954.5	388.5	2.625532e+004	2.625534e+003	22130.5	43	1.028334e+001	0	0	0	0	0	0	22324.7	1	1	49.1849	42.2609
DATA	2385	29	5	0	0	A_42_P788040	NM_001025053	9979.93	388.569	1.640753e+002	1.679731e+001	209	36	7.822840e+000	0	0	0	0	0	0	139.132	1	1	48.2044	37.0556
DATA	2386	29	6	0	0	A_42_P808945	NM_181368	10005.4	388.36	1.000494e+003	1.001143e+002	884.5	42	1.156937e+001	0	0	0	1	0	0	846.558	1	1	48.8603	41.2941
DATA	2387	29	7	0	0	A_64_P162713	A_64_P162713	10031	388.545	1.328434e+001	3.847813e+000	78.5	35	8.234605e+000	0	0	0	0	0	0	11.2222	1	0	55.8519	37.3939
DATA	2388	29	8	0	0	A_44_P501204	NM_017361	10056.5	388.5	2.460374e+002	2.486792e+001	276	33.5	9.655097e+000	0	0	0	0	0	0	207.617	1	1	65	36.4643
DATA	2389	29	9	0	0	A_42_P785926	NM_001108289	10081.8	388.608	9.574289e+002	9.581120e+001	849	42	8.476914e+000	0	0	0	0	0	0	807.443	1	1	49.1849	40.4839
DATA	2390	29	10	0	0	A_42_P616287	NM_001134555	10107.8	388.451	4.142101e+002	4.157870e+001	405	41.5	9.744260e+000	0	0	0	1	0	0	349.275	1	1	47.5395	41.7813
DATA	2391	29	11	66	-1	(-)3xSLv1	NegativeControl	10132.5	388.5	3.629558e+000	3.616687e+000	66	35	8.930356e+000	0	0	0	0	0	0	-2.21385	0	0	57.5363	35.3143
DATA	2392	29	12	0	0	A_43_P12365	NM_023101	10158	388.545	5.382633e+001	6.483351e+000	111.5	43	1.152476e+001	0	0	0	0	0	0	45.4358	1	1	55.8519	40.5152
DATA	2393	29	13	0	0	A_64_P076643	ENSRNOT00000057620	10183.1	388.789	3.622779e+000	3.611897e+000	68	37	9.329433e+000	0	0	0	0	0	0	1.00689	0	0	46.8651	36.8529
DATA	2394	29	14	0	0	A_64_P074865	XR_008898	10208.6	388.573	9.648239e+000	3.731422e+000	76	35	7.738479e+000	0	0	0	0	0	0	8.16568	1	0	57.5363	36.1667
DATA	2395	29	15	0	0	A_64_P009582	XM_214287	10234.3	388.5	3.000699e+004	3.000701e+003	24816	40	1.240393e+001	0	0	0	0	0	0	25443.9	1	1	57.5363	39.0667
DATA	2396	29	16	0	0	A_44_P527270	NM_020073	10259.5	389.056	8.482817e+001	9.211143e+000	141	34	1.006251e+001	0	0	0	0	0	0	72.0871	1	1	48.5334	36.8125
DATA	2397	29	17	0	0	A_44_P530813	NM_012922	10285	388.577	4.497876e+002	4.512108e+001	447	35	8.506489e+000	0	0	0	0	0	0	383.181	1	1	47.8731	36.973
DATA	2398	29	18	0	0	A_64_P078210	NM_001044303	10310.3	388.683	3.945890e+001	5.321823e+000	104	35	1.129244e+001	0	0	0	0	0	0	33.7096	1	1	44.4243	36.6842
DATA	2399	29	19	0	0	A_42_P764985	NM_133402	10335.8	388.658	5.922760e+003	5.922867e+002	5068	38	8.321626e+000	0	0	0	0	0	0	5075.31	1	1	49.5074	37.871
DATA	2400	29	20	0	0	A_43_P23097	NM_001011965	10361	388.838	4.730146e+001	5.913135e+000	108	38	6.976562e+000	0	0	0	0	0	0	40.6667	1	1	46.8651	38.3793
DATA	2401	29	21	0	0	A_43_P19450	NM_001105713	10386.4	389.099	2.084930e+002	2.114700e+001	245	39	9.423914e+000	0	0	0	0	0	0	179.884	1	1	47.8731	39.0882
DATA	2402	29	22	0	0	A_42_P514419	NM_001009599	10411.9	389.031	1.398770e+003	1.399213e+002	1270	39	7.953236e+000	0	0	0	0	0	0	1211.36	1	1	46.8651	37.0714
DATA	2403	29	23	0	0	A_64_P123974	A_64_P123974	10437.4	388.573	9.056605e+000	3.623888e+000	75	39	1.040606e+001	0	0	0	0	0	0	7.87387	1	0	57.5363	37.3235
DATA	2404	29	24	0	0	A_64_P221399	NM_134415	10462.5	389.159	3.455597e+003	3.455773e+002	3080	40	8.301649e+000	0	0	0	0	0	0	3016.57	1	1	43.7019	38.9259
DATA	2405	29	25	0	0	A_44_P760124	A_44_P760124	10487.9	388.873	1.959731e+002	1.990389e+001	256	37	6.153335e+000	0	0	0	0	0	0	171.796	1	1	45.4864	36.881
DATA	2406	29	26	0	0	A_42_P589551	NM_001037093	10513.4	388.866	3.705543e+003	3.705705e+002	3259	40	9.440230e+000	0	0	0	0	0	0	3262.65	1	1	45.835	38.6
DATA	2407	29	27	0	0	A_42_P645467	NM_001108804	10538.9	388.812	4.281035e+001	5.497700e+000	103	38	9.317728e+000	0	0	0	0	0	0	37.863	1	1	46.5243	39.1316
DATA	2408	29	28	0	0	A_64_P036006	A_64_P036006	10563.9	389.235	1.002642e+001	3.577077e+000	76	40	8.895079e+000	0	0	0	0	0	0	8.90797	1	0	46.1809	40.425
DATA	2409	29	29	0	0	A_64_P088575	NM_001106355	10589.8	389.029	4.179982e+002	4.193930e+001	448	38.5	1.104814e+001	0	0	0	0	0	0	373.123	1	1	46.1809	40.3824
DATA	2410	29	30	0	0	A_42_P798776	XM_002725203	10615	389	5.000591e+003	5.000707e+002	4502	36	1.060161e+001	0	0	0	0	0	0	4484.63	1	1	51.4001	36.4138
DATA	2411	29	31	0	0	A_64_P017424	XM_001067041	10640.1	389.193	9.346984e+000	3.512357e+000	75	31	7.249128e+000	0	0	0	0	0	0	8.422	1	0	50.1463	32.3704
DATA	2412	29	32	0	0	A_64_P147358	NM_001105764	10665.6	389.092	2.105579e+003	2.105849e+002	1955	37.5	1.206261e+001	0	0	0	0	0	0	1906.3	1	1	49.1849	39.1071
DATA	2413	29	33	0	0	A_42_P522285	NM_001044263	10691.2	389	3.883060e+002	3.897513e+001	419	36	1.130061e+001	0	0	0	0	0	0	353.253	1	1	46.8651	36.3704
DATA	2414	29	34	0	0	A_64_P130184	NM_017207	10716.4	388.988	1.696809e+003	1.697138e+002	1673	36	7.225832e+000	0	0	0	0	0	0	1550.95	1	1	49.8279	35.8333
DATA	2415	29	35	0	0	A_44_P167930	NM_012720	10742	388.903	4.799426e+003	4.799541e+002	4333	39	8.946075e+000	0	0	0	0	0	0	4407.85	1	1	46.8651	38.0323
DATA	2416	29	36	0	0	A_64_P135305	NM_001013426	10767.4	388.901	8.134070e+003	8.134137e+002	7478	39.5	7.988838e+000	0	0	0	0	0	0	7505.75	1	1	47.8731	39.6923
DATA	2417	29	37	0	0	A_64_P100182	NM_001077678	10792.6	389.427	2.194244e+001	3.955161e+000	90	38	7.768737e+000	0	0	0	0	0	0	20.3419	1	1	57.5363	38.7407
DATA	2418	29	38	0	0	A_44_P521699	NM_001007728	10817.9	389.03	2.258878e+002	2.282506e+001	282	37	8.696372e+000	0	0	0	0	0	0	210.367	1	1	46.8651	36.7576
DATA	2419	29	39	0	0	A_64_P053516	NM_001001280	10843.5	389.352	1.391160e+001	3.545151e+000	79.5	33	6.651419e+000	0	0	0	0	0	0	13.0151	1	0	57.5363	32.7931
DATA	2420	29	40	0	0	A_64_P073183	XM_001061392	10869.1	389.211	7.865915e+003	7.865982e+002	7188	40.5	9.518524e+000	0	0	0	0	0	0	7391.81	1	1	46.8651	41.1333
DATA	2421	29	41	0	0	A_64_P067447	NM_001109440	10894.4	389.427	1.208409e+003	1.208841e+002	1207	40.5	7.567404e+000	0	0	0	0	0	0	1140.48	1	1	65	40.6471
DATA	2422	29	42	0	0	A_64_P089251	NM_001014109	10919.6	389	1.745287e+002	1.774724e+001	236	44.5	1.103020e+001	0	0	0	0	0	0	165.4	1	1	45.4864	45.5357
DATA	2423	29	43	0	0	A_64_P118192	NM_022797	10944.8	389.234	7.192611e+002	7.199753e+001	748.5	37	7.331568e+000	0	0	0	0	0	0	684.409	1	1	49.5074	37.7576
DATA	2424	29	44	0	0	A_64_P082584	ENSRNOT00000024258	10970.2	388.879	1.425320e+002	1.460659e+001	206	37	1.084542e+001	0	0	0	0	0	0	136.154	1	1	43.3362	39.8621
DATA	2425	29	45	0	0	A_42_P465677	NM_001106241	10995.8	389.356	2.456485e+002	2.477001e+001	307	39	9.196343e+000	0	0	0	0	0	0	235.554	1	1	48.5334	40.5333
DATA	2426	29	46	0	0	A_42_P781999	NM_001106378	11021.4	389.271	2.307157e+004	2.307159e+003	21733	40	6.965609e+000	0	0	0	0	0	0	22203.8	1	1	47.5395	41.6552
DATA	2427	29	47	0	0	A_44_P991472	NM_134374	11046.6	389.427	7.816302e+002	7.822684e+001	800	40	8.529187e+000	0	0	0	0	0	0	754.794	1	1	57.5363	38.2609
DATA	2428	29	48	0	0	A_42_P767737	AY724480	11072.1	389.425	4.226549e+003	4.226667e+002	4072	39	1.124982e+001	0	0	0	0	0	0	4094.71	1	1	48.5334	36.5926
DATA	2429	29	49	0	0	A_42_P648200	NM_001037356	11097.6	389.113	1.775825e+002	1.803362e+001	250	42	9.163134e+000	0	0	0	0	0	0	172.562	1	1	47.5395	42.4857
DATA	2430	29	50	0	0	A_64_P006062	NM_001191695	11122.5	389.217	1.563844e+002	1.594874e+001	225	38	7.620448e+000	0	0	0	0	0	0	152.384	1	1	46.8651	36.9259
DATA	2431	29	51	0	0	A_42_P728230	NM_001037782	11148.2	389.261	4.061550e+003	4.061670e+002	3922	35	6.149803e+000	0	0	0	0	0	0	3968.11	1	1	46.5243	36.4848
DATA	2432	29	52	0	0	A_64_P106011	A_64_P106011	11173.7	389.5	3.126092e+000	3.126489e+000	73	35	1.177190e+001	0	0	0	0	0	0	2.62174	0	0	46.5243	39.7059
DATA	2433	29	53	0	0	A_42_P622661	NM_001024292	11199.1	389.392	2.478484e+003	2.478679e+002	2455.5	40.5	1.107924e+001	0	0	0	0	0	0	2432.43	1	1	48.8603	41.0882
DATA	2434	29	54	0	0	A_42_P619844	NM_001030037	11224.5	389.5	8.720602e+003	8.720657e+002	8409.5	43.5	8.620496e+000	0	0	0	0	0	0	8574.8	1	1	49.1849	42.8947
DATA	2436	29	56	0	0	A_64_P128260	XM_001056985	11275.2	389.658	1.338378e+003	1.338735e+002	1374	38	8.445397e+000	0	0	0	0	0	0	1319.96	1	1	48.2044	38.5161
DATA	2437	29	57	0	0	A_44_P1034950	NM_053294	11300.6	389.521	4.255026e+002	4.266230e+001	493	35	7.110556e+000	0	0	0	0	0	0	420.102	1	1	48.2044	35.32
DATA	2438	29	58	0	0	A_64_P080316	NM_139113	11325.8	389.338	4.243643e+002	4.254859e+001	491	41	6.312186e+000	0	0	0	0	0	0	419.313	1	1	48.8603	40.7429
DATA	2439	29	59	0	0	A_64_P053069	NM_001106820	11351.2	389.606	8.316428e+002	8.322150e+001	901	36	8.722441e+000	0	0	0	0	0	0	822.206	1	1	47.5395	37.1538
DATA	2440	29	60	0	0	A_42_P498066	NM_031136	11376.6	389.573	9.270757e+004	9.270758e+003	91767	43	1.116134e+001	0	0	0	0	0	0	91677.8	1	1	57.5363	42.037
DATA	2441	29	61	0	0	A_44_P277068	ENSRNOT00000058491	11402.1	389.627	6.932315e+003	6.932383e+002	6993	40	6.954125e+000	0	0	0	0	0	0	6854.98	1	1	48.8603	40.8788
DATA	2442	29	62	0	0	A_44_P685613	XM_225679	11427.6	389.611	1.760689e+003	1.760960e+002	1805.5	36	8.024180e+000	0	0	0	0	0	0	1740.42	1	1	48.2044	37.8148
DATA	2443	29	63	0	0	A_64_P124364	ENSRNOT00000015807	11453	389.545	3.070452e+002	3.085944e+001	374	40.5	9.079892e+000	0	0	0	0	0	0	303.307	1	1	65	42
DATA	2444	29	64	0	0	A_42_P466362	NM_017142	11478.2	390.015	8.331534e+002	8.337266e+001	884	44	1.076129e+001	0	0	0	0	0	0	822.25	1	1	46.1809	43.6552
DATA	2445	29	65	0	0	A_64_P081517	ENSRNOT00000037639	11503.2	389.551	1.054616e+002	1.099098e+001	180	45	9.235656e+000	0	0	0	0	0	0	103.944	1	1	46.8651	44.1212
DATA	2446	29	66	0	0	A_42_P629394	NM_031683	11529	389.753	3.122019e+003	3.122173e+002	3117.5	41.5	1.091817e+001	0	0	0	0	0	0	3072.11	1	1	47.5395	42.24
DATA	2447	29	67	0	0	A_44_P500975	NM_001000833	11554.2	389.592	6.928792e+001	7.593213e+000	133	30	8.097939e+000	0	0	0	0	1	0	68.048	1	1	49.1849	29.3125
DATA	2448	29	68	0	0	A_64_P165046	ENSRNOT00000015927	11579.6	389.685	1.278960e+002	1.316307e+001	194	30	9.438798e+000	0	0	0	0	0	0	125.323	1	1	48.5334	31.4545
DATA	2449	29	69	0	0	A_44_P222865	XM_235305	11605.2	389.884	7.717924e+003	7.717988e+002	7665	35	1.151965e+001	0	0	0	1	0	0	7542.95	1	1	46.5243	36.9643
DATA	2451	29	71	0	0	A_64_P131688	XM_574187	11656.1	389.935	8.802861e+001	9.346439e+000	154	38	1.367597e+001	0	0	0	0	0	0	85.4981	1	1	54.4085	40.9677
DATA	2452	29	72	0	0	A_42_P556457	NM_001033931	11681.3	389.905	1.422693e+003	1.423043e+002	1492.5	40	1.714089e+001	0	0	0	0	0	0	1376.83	1	1	48.8603	44.32
DATA	2453	29	73	0	0	A_42_P734384	NM_001108406	11706.8	389.903	2.160200e+003	2.160432e+002	2136.5	36.5	1.110602e+001	0	0	0	0	0	0	2082.22	1	1	46.8651	39.3667
DATA	2454	29	74	0	0	A_42_P728032	XM_001066058	11731.8	389.893	1.427847e+003	1.428200e+002	1453	38	9.611445e+000	0	0	0	0	0	0	1370.47	1	1	50.1463	38.1892
DATA	2455	29	75	0	0	A_64_P151525	A_64_P151525	11757.4	390.016	4.833459e+001	5.793051e+000	118	42	9.500418e+000	0	0	0	0	0	0	46.1756	1	1	43.7019	41.9643
DATA	2456	29	76	0	0	A_43_P19276	ENSRNOT00000039523	11782.7	390	8.036353e+002	8.042759e+001	827	39.5	7.594142e+000	0	0	0	0	0	0	763.922	1	1	49.1849	38.6364
DATA	2457	29	77	0	0	A_44_P529811	NM_001107657	11807.7	389.813	1.787454e+001	3.688359e+000	92	34	9.542773e+000	0	0	0	0	0	0	16.9014	1	1	45.1352	37.2581
DATA	2458	29	78	0	0	A_64_P104640	A_64_P104640	11833.5	390	3.221139e+004	3.221141e+003	31254.5	38	9.882605e+000	0	0	0	0	0	0	30282.8	1	1	54.1152	38.8611
DATA	2459	29	79	0	0	A_64_P003234	NM_001109048	11859	390.044	4.142769e+001	5.274537e+000	113	38	9.739966e+000	0	0	0	0	0	0	38.7117	1	1	46.8651	38.8125
DATA	2460	29	80	0	0	A_64_P097158	NM_001000875	11884.5	390.352	3.297270e+000	3.286702e+000	74	35	9.673511e+000	0	0	0	0	0	0	0.798359	0	0	57.5363	37.6087
DATA	2461	29	81	0	0	A_64_P141814	NM_001134629	11909.9	390.386	1.807065e+002	1.837090e+001	240	39.5	9.454262e+000	0	0	0	0	0	0	166.658	1	1	57.259	40.6875
DATA	2462	29	82	0	0	A_42_P463602	NM_001107592	11935.4	389.901	1.149496e+001	3.524415e+000	84	41.5	1.457142e+001	0	0	0	1	0	0	10.5253	1	0	47.5395	43.6154
DATA	2463	29	83	0	0	A_64_P083366	NM_001077643	11960.7	389.841	1.711796e+004	1.711799e+003	15487	38	1.104355e+001	0	0	0	0	0	0	15558.2	1	1	44.7812	38.28
DATA	2464	29	84	0	0	A_44_P121039	NM_172008	11986	389.723	2.873790e+002	2.893631e+001	333	38	8.091152e+000	0	0	0	0	0	0	259.165	1	1	45.4864	37.7813
DATA	2465	29	85	66	1	DarkCorner	DarkCorner	12011.5	390.352	3.422149e+000	3.410014e+000	70	38	9.451590e+000	0	0	0	0	0	0	-5.03275	0	0	57.5363	36.549
DATA	2466	30	1	66	1	DarkCorner	DarkCorner	9890.98	395.988	3.566200e+000	3.553553e+000	59	39	9.345367e+000	0	0	0	0	0	0	-7.50596	0	0	51.0895	40.449
DATA	2467	30	2	0	0	A_42_P687443	NM_020100	9916.58	395.573	1.392364e+002	1.437372e+001	189	41	1.327954e+001	0	0	0	0	0	0	119.022	1	1	65	42.2903
DATA	2468	30	3	0	0	A_42_P563382	ENSRNOT00000055321	9942.42	395.573	2.651053e+003	2.651295e+002	2241	44	1.180188e+001	0	0	0	0	0	0	2257.92	1	1	57.5363	44.1071
DATA	2469	30	4	0	0	A_42_P667100	NM_001013932	9967.19	395.506	1.956018e+003	1.956348e+002	1682	40.5	8.686868e+000	0	0	0	0	0	0	1661.1	1	1	50.4627	40.4118
DATA	2470	30	5	0	0	A_42_P553319	TC597248	9992.91	395.614	9.910861e+001	1.054480e+001	151	38	8.850188e+000	0	0	0	0	0	0	83.9606	1	1	57.259	39.2973
DATA	2471	30	6	0	0	A_64_P151358	NM_181695	10018.4	395.573	1.982934e+001	4.116792e+000	83	39	9.534898e+000	0	0	0	0	0	0	16.7673	1	1	57.5363	39
DATA	2472	30	7	0	0	A_44_P196743	ENSRNOT00000007795	10043.4	396.227	3.625248e+000	3.613897e+000	68	34	6.749592e+000	0	0	0	0	0	0	0.880431	0	0	45.835	34.9032
DATA	2474	30	9	0	0	A_64_P127111	NM_001106004	10094.3	395.9	9.382628e+003	9.382698e+002	7840.5	42	8.900265e+000	0	0	0	0	0	0	7914.18	1	1	47.2035	43.7027
DATA	2475	30	10	0	0	A_42_P470775	NM_001025126	10119.8	395.788	1.989046e+003	1.989375e+002	1707	38.5	1.061802e+001	0	0	0	0	0	0	1677.92	1	1	45.835	38.5
DATA	2476	30	11	0	0	A_44_P472855	NM_001000961	10145.2	396	9.359531e+001	1.003315e+001	143.5	35	9.656733e+000	0	0	0	0	0	0	78.999	1	1	46.1809	37.1316
DATA	2477	30	12	0	0	A_64_P080682	NM_001109652	10170.5	396	8.396556e+000	3.707230e+000	73	42	1.076683e+001	0	0	0	0	0	0	7.09381	1	0	54.1152	38.5161
DATA	2478	30	13	0	0	A_42_P727368	NM_001025693	10195.9	396.069	6.857222e+001	7.747591e+000	124	36	8.800470e+000	0	0	0	0	0	0	58.0107	1	1	46.8651	37
DATA	2479	30	14	0	0	A_64_P034427	A_64_P034427	10221.1	396.111	3.178872e+003	3.179076e+002	2798	44	1.224010e+001	0	0	0	0	0	0	2693.79	1	1	45.4864	41.5152
DATA	2480	30	15	0	0	A_64_P042871	A_64_P042871	10246.3	396.161	5.230777e+002	5.243101e+001	524.5	45	1.140019e+001	0	0	0	0	0	0	444.158	1	1	44.4243	41.3478
DATA	2481	30	16	0	0	A_64_P152617	NM_001105747	10271.5	396.174	2.900745e+001	4.611047e+000	91.5	35	7.557338e+000	0	0	0	0	0	0	24.6885	1	1	47.2035	35.6923
DATA	2482	30	17	0	0	A_44_P468879	NM_001007798	10297.4	396.063	2.380339e+001	4.294675e+000	87	35	8.902082e+000	0	0	0	0	0	0	20.3141	1	1	44.4243	35.6
DATA	2483	30	18	0	0	A_44_P252976	NM_001012071	10323	396	1.553086e+002	1.593458e+001	197	35.5	1.058132e+001	0	0	0	0	0	0	132.933	1	1	54.9904	37.25
DATA	2484	30	19	0	0	A_64_P014080	NM_022189	10348.3	396.182	7.813938e+000	3.637708e+000	75	41	8.714171e+000	0	0	0	0	0	0	6.70954	1	0	45.4864	38.8333
DATA	2485	30	20	0	0	A_44_P204789	NM_001025684	10373.4	396.027	5.897831e+002	5.908450e+001	581	38.5	9.248580e+000	0	0	0	0	0	0	508.138	1	1	48.5334	38.3333
DATA	2486	30	21	0	0	A_64_P030373	NM_001127319	10399.1	396.03	5.173009e+001	6.261433e+000	112.5	39	1.093810e+001	0	0	0	0	0	0	44.7332	1	1	46.8651	39.7273
DATA	2487	30	22	0	0	A_42_P558703	NM_001106810	10424.5	396.174	4.680929e+002	4.694103e+001	462.5	38	8.815431e+000	0	0	0	0	0	0	406.336	1	1	47.2035	36.6129
DATA	2488	30	23	0	0	A_44_P241190	NM_001013199	10449.9	396.313	9.812885e+002	9.819125e+001	930	39	8.643418e+000	0	0	0	0	0	0	855.261	1	1	45.835	37.4688
DATA	2489	30	24	0	0	A_42_P539095	XM_001081794	10475.2	396.239	9.843090e+002	9.849260e+001	925	36	6.917521e+000	0	0	0	0	0	0	861.45	1	1	46.8651	36.1714
DATA	2490	30	25	0	0	A_64_P010905	ENSRNOT00000057216	10500.6	396.427	1.224612e+002	1.272845e+001	173	37	8.473555e+000	0	0	0	0	0	0	107.639	1	1	57.5363	37.3636
DATA	2491	30	26	0	0	A_44_P500660	NM_001007645	10526.1	396.232	3.372661e+002	3.390316e+001	365.5	41	1.049491e+001	0	0	0	0	0	0	297.759	1	1	46.5243	39.5897
DATA	2492	30	27	0	0	A_64_P056436	A_64_P056436	10551.2	396.333	2.811887e+002	2.832850e+001	317	39.5	8.978646e+000	0	0	0	0	0	0	249.369	1	1	49.1849	41.2667
DATA	2493	30	28	0	0	A_42_P773816	NM_017079	10576.9	396.157	1.376285e+002	1.418237e+001	190	38.5	1.091129e+001	0	0	0	0	0	0	122.623	1	1	46.8651	40.3947
DATA	2494	30	29	0	0	A_64_P138604	NM_001009967	10602.4	396.427	5.341542e+004	5.341543e+003	46898	41	1.154036e+001	0	0	0	0	0	0	47816.3	1	1	57.5363	40.0714
DATA	2495	30	30	0	0	A_42_P705302	NM_001107361	10627.7	396.382	7.183134e+003	7.183214e+002	6395	31	6.920501e+000	0	0	0	0	0	0	6460.45	1	1	46.5243	31.68
DATA	2496	30	31	0	0	A_64_P027259	NM_001191656	10652.8	396.545	2.355151e+004	2.355154e+003	21139	37	1.277262e+001	0	0	0	0	0	0	21282.3	1	1	52.6241	40.1613
DATA	2497	30	32	0	0	A_44_P288333	ENSRNOT00000006659	10678.1	396.582	2.033926e+002	2.061491e+001	254	35	9.459402e+000	0	0	0	0	0	0	184.673	1	1	46.1809	35.1379
DATA	2498	30	33	0	0	A_42_P618217	NM_130752	10703.5	396.278	8.496098e+001	9.130480e+000	147	37	7.616150e+000	0	0	0	0	0	0	77.5092	1	1	48.2044	38.1667
DATA	2499	30	34	0	0	A_64_P151587	A_64_P151587	10729.4	396.427	6.841022e+000	3.397304e+000	75	39	9.116687e+000	0	0	0	0	0	0	6.27145	1	0	57.5363	38.7742
DATA	2500	30	35	0	0	A_42_P771107	NM_001108217	10754.6	396.5	9.346828e+002	9.352694e+001	887	40	9.015786e+000	0	0	0	0	0	0	860.903	1	1	47.8731	38.8929
DATA	2501	30	36	0	0	A_42_P689013	NM_053800	10780	396.343	1.818001e+004	1.818004e+003	16442	36	7.624372e+000	0	0	0	0	0	0	16823.4	1	1	45.4864	39.1481
DATA	2502	30	37	0	0	A_64_P155334	NM_001100945	10805.4	396.479	2.533410e+003	2.533622e+002	2394	38.5	9.416509e+000	0	0	0	0	0	0	2355.28	1	1	48.2044	39.1786
DATA	2503	30	38	0	0	A_64_P049007	A_64_P049007	10830.6	396.639	4.276910e+001	5.381666e+000	109.5	36	1.057532e+001	0	0	0	0	0	0	39.9423	1	1	48.2044	37.1379
DATA	2504	30	39	0	0	A_44_P351461	ENSRNOT00000027179	10856.3	396.5	4.900447e+001	5.881211e+000	113.5	36	6.846164e+000	0	0	0	0	0	0	45.9731	1	1	57.5363	36.0313
DATA	2505	30	40	0	0	A_44_P604267	NM_022933	10881.3	396.729	4.067349e+002	4.080216e+001	447	40	5.833810e+000	0	0	0	0	0	0	383.222	1	1	46.8651	39.6333
DATA	2506	30	41	0	0	A_64_P070475	XM_001061514	10907	396.545	3.610758e+000	3.244084e+000	72	40	8.630512e+000	0	0	0	0	0	0	3.41669	1	0	55.8519	40.6176
DATA	2507	30	42	0	0	A_64_P119963	A_64_P119963	10932.4	396.573	9.243459e+002	9.249033e+001	938.5	39	8.136953e+000	0	0	0	0	0	0	878.294	1	1	57.5363	40.28
DATA	2508	30	43	0	0	A_42_P658562	NM_001134416	10957.7	396.778	3.761348e+002	3.774917e+001	436	36.5	8.254421e+000	0	0	0	0	0	0	358.822	1	1	47.5395	38.5294
DATA	2509	30	44	0	0	A_64_P116830	A_64_P116830	10982.9	396.829	5.818830e+001	6.633775e+000	124.5	37	7.239365e+000	0	0	0	0	0	0	55.723	1	1	46.8651	38.6571
DATA	2510	30	45	0	0	A_64_P048531	ENSRNOT00000019473	11008.6	396.573	1.165916e+002	1.208343e+001	179.5	41.5	9.268620e+000	0	0	0	0	0	0	112.067	1	1	57.5363	41.8235
DATA	2511	30	46	0	0	A_64_P122716	NM_139331	11034	396.545	7.503342e+000	3.250495e+000	78	40	7.663993e+000	0	0	0	0	0	0	7.2375	1	0	55.8519	40.2333
DATA	2512	30	47	0	0	A_64_P077323	NM_201992	11059.4	396.573	1.975371e+001	3.719995e+000	87	39	1.108103e+001	0	0	0	0	0	0	19.1174	1	1	57.5363	38.4074
DATA	2513	30	48	0	0	A_42_P569711	NM_001108977	11084.6	396.573	2.976525e+002	2.993067e+001	358.5	42	1.037575e+001	0	0	0	0	0	0	288.961	1	1	57.5363	42.2143
DATA	2514	30	49	0	0	A_42_P474100	NM_001191820	11110.3	396.618	7.251184e+003	7.251252e+002	7116	40	9.018841e+000	0	0	0	0	0	0	7060.41	1	1	46.5243	39.6857
DATA	2515	30	50	0	0	A_64_P026404	A_64_P026404	11135.5	396.648	1.028571e+001	3.289596e+000	79	37.5	8.695277e+000	0	0	0	0	0	0	10.0421	1	0	57.5363	38.2941
DATA	2516	30	51	0	0	A_64_P026581	ENSRNOT00000029099	11160.9	396.768	4.136558e+003	4.136675e+002	3957	34	7.774849e+000	0	0	0	0	0	0	4048.72	1	1	46.5243	36.3448
DATA	2517	30	52	0	0	A_64_P043624	NM_133565	11186.3	396.894	3.537393e+003	3.537530e+002	3567	39	9.272390e+000	0	0	0	0	0	0	3470.13	1	1	45.835	40.1481
DATA	2518	30	53	0	0	A_44_P417429	NM_001011983	11211.6	397.129	2.974044e+003	2.974206e+002	2912	43	8.795561e+000	0	0	0	0	0	0	2923.43	1	1	46.8651	41.8438
DATA	2519	30	54	0	0	A_64_P007574	ENSRNOT00000028681	11237	397.226	2.127692e+004	2.127694e+003	20567	45	9.050492e+000	0	0	0	0	0	0	20951.9	1	1	45.4864	43.7568
DATA	2520	30	55	0	0	A_42_P529690	NM_001173510	11262.5	396.648	3.157930e+004	3.157932e+003	30613.5	40	9.190262e+000	0	0	0	0	0	0	31142.6	1	1	57.5363	40.4333
DATA	2521	30	56	0	0	A_42_P505070	TC624062	11288	397	3.716784e+003	3.716912e+002	3712	37	7.693161e+000	0	0	0	0	0	0	3670.08	1	1	46.8651	37.5517
DATA	2522	30	57	0	0	A_42_P504653	NM_017143	11312.7	396.841	3.226084e+001	4.464830e+000	106	39.5	9.609024e+000	0	0	0	0	0	0	31.8852	1	1	46.5243	39.5
DATA	2523	30	58	0	0	A_64_P017891	A_64_P017891	11338.5	397	7.480712e+000	3.173802e+000	78	37.5	8.753354e+000	0	0	0	0	0	0	7.39891	1	0	54.1152	39.5
DATA	2524	30	59	0	0	A_42_P642724	NM_001107585	11364.3	396.938	3.758086e+003	3.758212e+002	3727	37.5	9.774170e+000	0	0	0	0	0	0	3718.49	1	1	45.4864	37.8571
DATA	2525	30	60	0	0	A_42_P780943	NM_001011906	11389.4	397.015	9.664159e+002	9.669075e+001	1016	43	9.575653e+000	0	0	0	0	0	0	956.343	1	1	47.5395	41.2857
DATA	2526	30	61	0	0	A_44_P482325	NM_145669	11415	396.897	8.202168e+002	8.207961e+001	866	38	9.168201e+000	0	0	0	0	0	0	811.504	1	1	46.8651	37.4516
DATA	2527	30	62	0	0	A_42_P716750	NM_001024757	11440.3	396.971	2.900528e+002	2.916887e+001	366	37	8.199947e+000	0	0	0	0	0	0	286.832	1	1	46.1809	38.75
DATA	2528	30	63	0	0	A_64_P009565	NM_001191823	11465.5	397	2.120860e+002	2.143213e+001	284.5	39	9.049175e+000	0	0	0	0	0	0	209.564	1	1	54.1152	39.4643
DATA	2529	30	64	0	0	A_42_P495969	NM_012824	11490.9	397.192	7.173253e+003	7.173320e+002	7106	41	9.683486e+000	0	0	0	0	0	0	7080.2	1	1	47.5395	41.3548
DATA	2530	30	65	0	0	A_64_P154671	ENSRNOT00000024704	11516.4	397.093	2.031681e+002	2.055123e+001	277	43	7.939612e+000	0	0	0	0	0	0	200.241	1	1	49.1849	42.4118
DATA	2531	30	66	0	0	A_44_P111337	NM_001108724	11541.9	396.813	2.251962e+003	2.252175e+002	2290	38	1.174605e+001	0	0	0	0	0	0	2215.53	1	1	45.4864	38.0286
DATA	2532	30	67	0	0	A_42_P665627	NM_023095	11567.2	397	7.146732e+001	7.792984e+000	135.5	30	7.322847e+000	0	0	0	0	1	0	70.1663	1	1	46.8651	29.3774
DATA	2533	30	68	0	0	A_44_P447585	NM_001166676	11593.8	397.472	8.058753e+001	8.746797e+000	149	33	9.977158e+000	0	0	0	0	0	0	78.9233	1	1	41.8414	35.1765
DATA	2534	30	69	0	0	A_42_P463754	NM_030994	11617.5	397.099	4.760300e+002	4.770534e+001	513	31	8.796940e+000	0	0	0	1	0	0	464.979	1	1	47.8731	30.8846
DATA	2535	30	70	0	0	A_42_P644717	NM_001108927	11643.4	397.427	1.217632e+002	1.257289e+001	157	36	1.040327e+001	0	0	0	1	0	0	118.567	1	1	57.5363	36.8065
DATA	2536	30	71	0	0	A_42_P546539	NM_001135801	11669.2	396.958	6.202152e+002	6.210116e+001	674	40	1.553252e+001	0	0	0	0	0	0	601.798	1	1	46.8651	42.4815
DATA	2537	30	72	0	0	A_42_P818297	XM_001073988	11694.1	397.278	1.378879e+003	1.379240e+002	1363	37	1.293533e+001	0	0	0	0	0	0	1333.04	1	1	47.8731	41.4138
DATA	2538	30	73	0	0	A_64_P047416	NM_001109501	11719.5	397.352	2.746215e+002	2.764434e+001	349	36	9.246062e+000	0	0	0	0	0	0	264.407	1	1	57.5363	38.4
DATA	2539	30	74	0	0	A_43_P18389	XM_002726292	11744.9	397.5	2.204220e+001	3.871376e+000	94.5	41	8.283019e+000	0	0	0	0	0	0	21.1283	1	1	65	40.5429
DATA	2540	30	75	0	0	A_64_P044276	NM_001105946	11770.1	396.952	3.603861e+003	3.604003e+002	3498.5	40	5.365942e+000	0	0	0	0	0	0	3437.78	1	1	45.4864	39.72
DATA	2541	30	76	0	0	A_64_P059475	ENSRNOT00000029976	11795.6	397.427	3.225841e+000	3.214402e+000	71.5	41	1.379074e+001	0	0	0	0	0	0	-2.34513	0	0	57.5363	42.7692
DATA	2542	30	77	0	0	A_64_P005496	A_64_P005496	11821.1	397.5	1.230722e+001	3.458556e+000	84	39.5	9.175704e+000	0	0	0	0	0	0	11.616	1	0	56.9804	38.75
DATA	2544	30	79	0	0	A_42_P739860	NM_133578	11871.9	397.627	3.038896e+003	3.039072e+002	2781	37	8.557208e+000	0	0	0	0	0	0	2834.01	1	1	45.835	38
DATA	2545	30	80	0	0	A_42_P681251	NM_030844	11897.1	397.379	4.268185e+003	4.268312e+002	4040	42	1.068716e+001	0	0	0	0	0	0	3954.55	1	1	45.4864	41.7
DATA	2546	30	81	0	0	A_42_P567793	NM_001107668	11922.5	397.278	2.764162e+003	2.764361e+002	2637	40.5	9.459675e+000	0	0	0	0	0	0	2543.4	1	1	48.2044	40.3214
DATA	2547	30	82	0	0	A_64_P041662	NM_182843	11948.5	396.78	4.597458e+002	4.609578e+001	492	34	9.338521e+000	0	0	0	0	0	0	419.872	1	1	42.9674	36.1481
DATA	2548	30	83	0	0	A_42_P534679	NM_001134974	11973.5	397.386	2.850789e+003	2.850988e+002	2592.5	38.5	9.797136e+000	0	0	0	0	0	0	2584.56	1	1	47.5395	39.125
DATA	2549	30	84	66	1	DarkCorner	DarkCorner	11998.7	397.5	3.403377e+000	3.391307e+000	66	42	1.139111e+001	0	0	0	0	0	0	-7.66402	0	0	57.5363	41.3667
DATA	2550	30	85	66	1	DarkCorner	DarkCorner	12024.1	397.525	8.318931e+000	3.519113e+000	79.5	33	8.706604e+000	0	0	0	0	0	0	7.42188	1	0	43.7019	33.4644
DATA	2551	31	1	66	1	DarkCorner	DarkCorner	9878.31	403.111	3.557426e+000	3.544810e+000	62	34	8.625999e+000	0	0	0	0	0	0	-2.62775	0	0	47.8731	34.8921
DATA	2552	31	2	0	0	A_42_P576549	NM_001106490	9904	403	5.435542e+000	3.602317e+000	72	39	1.056852e+001	0	0	0	0	0	0	4.65645	1	0	65	40.2051
DATA	2553	31	3	0	0	A_42_P542638	NM_001012202	9929.3	402.971	6.123035e+002	6.133461e+001	598	42	1.103621e+001	0	0	0	0	0	0	522.517	1	1	46.1809	41.2581
DATA	2554	31	4	0	0	A_42_P765736	NM_001025670	9954.65	402.739	1.796404e+001	4.011279e+000	81	40	6.810207e+000	0	0	0	0	0	0	15.2799	1	1	47.2035	40.0741
DATA	2555	31	5	0	0	A_44_P372461	NM_001170708	9979.99	402.985	6.166285e+002	6.176762e+001	584	42	9.180129e+000	0	0	0	0	0	0	523.101	1	1	46.8651	41.0541
DATA	2556	31	6	0	0	A_64_P070554	XM_001059856	10005.2	403.2	3.122541e+001	4.768259e+000	90	38	9.481371e+000	0	0	0	0	0	0	26.434	1	1	46.1809	39.2162
DATA	2557	31	7	0	0	A_64_P030859	ENSRNOT00000045252	10030.7	403.222	1.845102e+004	1.845105e+003	15623.5	35	8.688236e+000	0	0	0	0	0	0	15595.1	1	1	47.5395	37.6786
DATA	2558	31	8	0	0	A_64_P079260	NM_001005546	10056.3	402.971	2.567711e+002	2.593008e+001	283.5	36	8.319808e+000	0	0	0	0	0	0	216.795	1	1	46.1809	36.8276
DATA	2559	31	9	0	0	A_64_P149846	A_64_P149846	10081.6	402.862	1.416950e+004	1.416954e+003	12238	40	8.005694e+000	0	0	0	0	0	0	11956.7	1	1	45.4864	41.6552
DATA	2560	31	10	0	0	A_64_P120624	NM_031634	10107	403.473	1.117162e+001	3.784142e+000	77	40.5	9.611349e+000	0	0	0	0	0	0	9.42635	1	0	48.5334	42.4063
DATA	2561	31	11	0	0	A_64_P158020	NM_001008909	10132.2	403.559	6.897212e+001	7.786796e+000	126	36	9.150096e+000	0	0	0	0	0	0	58.2171	1	1	46.8651	36.8837
DATA	2562	31	12	0	0	A_64_P116606	NM_153724	10158	403.247	5.299114e+001	6.412754e+000	111	37.5	9.900898e+000	0	0	0	0	0	0	44.7621	1	1	47.5395	39.0278
DATA	2563	31	13	0	0	A_44_P532436	ENSRNOT00000006946	10183.1	403.433	1.546734e+001	3.924928e+000	81	35	1.042560e+001	0	0	0	0	0	0	13.0805	1	0	45.835	36.5455
DATA	2564	31	14	0	0	A_64_P027545	NM_023095	10208.6	402.761	1.694696e+002	1.732550e+001	214	37	8.202532e+000	0	0	0	0	0	0	143.534	1	1	46.5243	36.8077
DATA	2565	31	15	0	0	A_64_P076705	NM_017088	10234.3	403.5	1.186085e+005	1.186085e+004	99411	41	9.453935e+000	0	0	0	0	0	0	100653	1	1	57.5363	42.4242
DATA	2566	31	16	0	0	A_44_P238642	NM_001127201	10259.4	403.608	4.110364e+003	4.110520e+002	3508.5	34.5	9.710203e+000	0	0	0	0	0	0	3495.79	1	1	49.1849	35.875
DATA	2567	31	17	0	0	A_64_P037249	NM_001105802	10284.9	403.324	7.961053e+001	8.728127e+000	135	36	7.320461e+000	0	0	0	0	0	0	67.8777	1	1	48.8603	35.5116
DATA	2568	31	18	0	0	A_64_P061524	NM_172064	10310.3	403.481	3.476812e+002	3.495071e+001	364	35	1.074321e+001	0	0	0	0	0	0	297.277	1	1	51.0895	36.3333
DATA	2569	31	19	0	0	A_42_P536564	NM_001008344	10335.7	403.203	3.971976e+003	3.972136e+002	3354	41	8.824336e+000	0	0	0	0	0	0	3406.55	1	1	46.8651	38.8857
DATA	2570	31	20	0	0	A_64_P062433	NM_001135804	10361.1	403.113	5.029583e+002	5.042062e+001	497.5	41.5	8.533556e+000	0	0	0	0	0	0	432.789	1	1	45.1352	41.2188
DATA	2571	31	21	0	0	A_42_P665509	NM_053777	10386.5	403.5	5.237276e+004	5.237277e+003	45017	41	1.052862e+001	0	0	0	0	0	0	45227.3	1	1	57.5363	40.5
DATA	2572	31	22	0	0	A_44_P250144	NM_001001373	10411.4	403.821	9.959436e+000	3.657784e+000	79	39.5	9.007596e+000	0	0	0	0	0	0	8.63249	1	0	46.5243	38.9667
DATA	2573	31	23	0	0	A_42_P746838	NM_001024286	10436.8	403.714	5.185071e+001	6.259064e+000	113	35.5	7.434083e+000	0	0	0	1	0	0	45.1186	1	1	49.5074	34.3529
DATA	2574	31	24	0	0	A_44_P210852	NM_001034187	10462.3	403.775	9.756907e+001	1.036279e+001	150	35.5	8.049558e+000	0	0	0	0	0	0	85.2509	1	1	47.2035	36.3462
DATA	2575	31	25	0	0	A_64_P019390	A_64_P019390	10488.1	403.5	2.721171e+001	4.414833e+000	89.5	37	8.697532e+000	0	0	0	0	0	0	23.8785	1	1	56.9804	37
DATA	2576	31	26	0	0	A_64_P134709	NM_001105760	10513.1	403.382	1.142876e+002	1.194150e+001	171.5	38	8.948687e+000	0	0	0	0	0	0	100.719	1	1	46.1809	37.7429
DATA	2578	31	28	0	0	A_64_P028117	NM_001000372	10564.4	403.573	4.407443e+001	5.584862e+000	107	39.5	1.179625e+001	0	0	0	0	0	0	39.1996	1	1	57.5363	40.6389
DATA	2579	31	29	0	0	A_44_P391517	NM_001034144	10589.6	403.573	3.670866e+002	3.686710e+001	396	42	9.350720e+000	0	0	0	0	0	0	327.992	1	1	57.5363	44.3103
DATA	2580	31	30	0	0	A_42_P743682	NM_133599	10615	403.545	5.545285e+001	6.503705e+000	114	37	9.695138e+000	0	0	0	0	0	0	49.781	1	1	55.8519	36.9355
DATA	2581	31	31	0	0	A_64_P163075	NM_001109321	10640.4	403.573	3.155047e+001	4.625262e+000	98.5	36	9.846550e+000	0	0	0	0	0	0	28.4584	1	1	65	35.7273
DATA	2582	31	32	0	0	A_44_P393422	NM_001013188	10665.6	403.783	1.498400e+003	1.498778e+002	1355	35.5	1.059034e+001	0	0	0	0	0	0	1357.98	1	1	47.2035	36.3462
DATA	2583	31	33	0	0	A_44_P288982	NM_001107913	10691.2	403.681	1.189435e+002	1.235710e+001	179	37.5	8.108460e+000	0	0	0	0	0	0	108.316	1	1	46.8651	36.6667
DATA	2584	31	34	0	0	A_64_P009788	NM_001191099	10716.5	403.648	2.511138e+001	4.173935e+000	92	39	1.022484e+001	0	0	0	0	0	0	22.9769	1	1	57.5363	41.2121
DATA	2585	31	35	0	0	A_42_P764228	NM_031707	10741.9	403.88	4.814756e+003	4.814870e+002	4391	40	1.028385e+001	0	0	0	0	0	0	4426.55	1	1	47.8731	39.8485
DATA	2586	31	36	0	0	A_64_P161621	NM_001101015	10767.4	403.573	3.723424e+002	3.738042e+001	416	36	8.777350e+000	0	0	0	0	0	0	343.94	1	1	57.5363	37.5517
DATA	2587	31	37	0	0	A_42_P763522	NM_001013980	10792.7	404.014	3.477259e+003	3.477415e+002	3292	36.5	8.841191e+000	0	0	0	0	0	0	3227.06	1	1	47.2035	37.9167
DATA	2588	31	38	0	0	A_64_P029935	NM_001109299	10817.9	404.172	5.319852e+002	5.329906e+001	569	38.5	8.659567e+000	0	0	0	0	0	0	495.968	1	1	45.4864	38.3929
DATA	2589	31	39	0	0	A_64_P045053	A_64_P045053	10843	404.185	1.999536e+002	2.025898e+001	250.5	36	7.342760e+000	0	0	0	0	0	0	187.252	1	1	45.835	35.129
DATA	2590	31	40	0	0	A_42_P540920	NM_001135045	10868.7	403.863	3.595400e+003	3.595547e+002	3390	37	6.214185e+000	0	0	0	0	0	0	3382.07	1	1	48.2044	37.9333
DATA	2591	31	41	0	0	A_64_P055323	NM_001191930	10894.2	404.031	2.245649e+002	2.268745e+001	282	40	7.840640e+000	0	0	0	0	0	0	212.16	1	1	45.835	41.2286
DATA	2592	31	42	0	0	A_64_P047162	NM_153472	10919.7	403.754	5.216402e+003	5.216501e+002	4912.5	41.5	8.657402e+000	0	0	0	0	0	0	4949	1	1	45.1352	42.2188
DATA	2593	31	43	0	0	A_64_P279594	NM_001170476	10945	404	1.422576e+001	3.504175e+000	83	39	9.221188e+000	0	0	0	0	0	0	13.5516	1	0	54.9904	38.0303
DATA	2594	31	44	0	0	A_42_P665509	NM_053777	10970.5	404	5.225199e+004	5.225200e+003	48907	37	7.069856e+000	0	0	0	0	0	0	49972.2	1	1	54.1152	38.2188
DATA	2595	31	45	0	0	A_64_P106638	NM_001108198	10995.8	403.897	1.126788e+002	1.170744e+001	177	38.5	1.065372e+001	0	0	0	0	0	0	108.168	1	1	46.5243	40.2059
DATA	2596	31	46	0	0	A_64_P141245	NM_001105920	11021.1	403.9	1.510615e+003	1.510947e+002	1505	40	8.586900e+000	0	0	0	0	0	0	1455.35	1	1	46.8651	40.8788
DATA	2597	31	47	0	0	A_42_P503739	FQ231471	11046.7	404.014	1.709332e+004	1.709335e+003	15811	39	5.905662e+000	0	0	0	0	0	0	16525	1	1	47.2035	37.6552
DATA	2598	31	48	0	0	A_44_P282433	NM_033230	11071.9	404.104	7.611279e+002	7.617775e+001	806	40	1.293050e+001	0	0	0	0	0	0	738.198	1	1	46.8651	39.7419
DATA	2599	31	49	0	0	A_42_P585750	NM_001202463	11097	404	2.005715e+001	3.722556e+000	90	41	8.807012e+000	0	0	0	0	0	0	19.5113	1	1	46.8651	39.975
DATA	2600	31	50	0	0	A_42_P523517	FQ229104	11122.9	403.672	6.911836e+003	6.911906e+002	6569	41	1.019725e+001	0	0	0	0	0	0	6742.99	1	1	45.1352	40.375
DATA	2601	31	51	0	0	A_64_P126190	NM_001113789	11148.4	404.427	2.677060e+001	4.110079e+000	98.5	34	6.873405e+000	0	0	0	0	0	0	26.1868	1	1	57.5363	36.8571
DATA	2602	31	52	0	0	A_42_P549675	NM_080577	11173.6	404.028	4.614011e+003	4.614116e+002	4439	39	9.559114e+000	0	0	0	0	0	0	4523.9	1	1	48.2044	39.72
DATA	2603	31	53	0	0	A_42_P535644	NM_024400	11199.3	404.132	7.138001e+002	7.144749e+001	732.5	36	8.455009e+000	0	0	0	0	0	0	701.39	1	1	49.5074	38.1111
DATA	2604	31	54	0	0	A_64_P050233	XM_345239	11224.2	404.152	1.814579e+002	1.840849e+001	248.5	44	1.024223e+001	0	0	0	0	0	0	178.635	1	1	46.1809	44
DATA	2605	31	55	0	0	A_64_P121575	NM_001013144	11249.7	403.71	5.413828e+001	6.235497e+000	120.5	41	9.095870e+000	0	0	0	0	0	0	53.3824	1	1	46.8651	41.1212
DATA	2606	31	56	0	0	A_64_P018263	NM_012728	11275	404.129	2.591691e+002	2.610040e+001	322	41	7.795744e+000	0	0	0	0	0	0	255.915	1	1	46.8651	42.1176
DATA	2607	31	57	0	0	A_64_P164682	TC600307	11300.7	403.667	1.041119e+004	1.041124e+003	10212	38	9.013038e+000	0	0	0	0	0	0	10291.7	1	1	44.4243	38.8788
DATA	2608	31	58	0	0	A_44_P1045612	NM_172317	11326	403.754	3.468038e+002	3.481718e+001	412	41	9.107481e+000	0	0	0	0	0	0	343.112	1	1	45.4864	42.2286
DATA	2609	31	59	0	0	A_42_P529514	NM_001008308	11351.4	404.319	4.966919e+002	4.976469e+001	558	40	5.176277e+000	0	0	0	0	0	0	491.704	1	1	48.5334	40.0769
DATA	2610	31	60	0	0	A_44_P870348	NM_001107522	11376.6	404.427	3.017094e+002	3.032782e+001	376	37	9.069560e+000	0	0	0	0	0	0	298.763	1	1	57.5363	36.5652
DATA	2611	31	61	0	0	A_64_P108264	XM_223835	11401.7	403.817	5.462277e+001	6.271278e+000	130	39	9.171762e+000	0	0	0	0	0	0	54.0851	1	1	44.0646	37.3939
DATA	2612	31	62	0	0	A_42_P754784	CB328432	11427.5	404.278	6.679915e+003	6.679986e+002	6658	36	1.035693e+001	0	0	0	0	0	0	6612.28	1	1	48.2044	39.1379
DATA	2613	31	63	0	0	A_64_P084525	NM_001101001	11452.7	404.373	2.259443e+003	2.259654e+002	2278	41	8.235681e+000	0	0	0	0	0	0	2235.18	1	1	51.0895	40.6333
DATA	2614	31	64	0	0	A_64_P378583	NM_001099516	11478.4	404.427	9.252026e+000	3.222369e+000	81	35.5	9.492223e+000	0	0	0	0	0	0	9.14401	1	0	57.5363	37.3667
DATA	2615	31	65	0	0	A_64_P154172	NM_001000557	11503.7	404.41	3.101572e+000	3.090573e+000	72	42.5	8.902190e+000	0	0	0	0	0	0	-0.534345	0	0	50.4627	42.0938
DATA	2616	31	66	0	0	A_64_P074634	NM_001024287	11529.2	404.343	1.883722e+002	1.908987e+001	261	36.5	1.123370e+001	0	0	0	0	0	0	185.642	1	1	46.1809	37.4706
DATA	2617	31	67	1028	1	(+)E1A_r60_a22	E1A_r60_a22	11554	403.902	1.234520e+002	1.272882e+001	183	28	7.733674e+000	0	0	0	0	1	0	121.432	1	1	36.1258	28.9231
DATA	2618	31	68	0	0	A_43_P12780	NM_053350	11580.4	404.397	1.915389e+002	1.940448e+001	244.5	30	8.121425e+000	0	0	0	0	0	0	187.977	1	1	47.2035	31.04
DATA	2619	31	69	0	0	A_44_P442169	NM_001013034	11605.4	404.267	2.677126e+003	2.677308e+002	2674	29	1.135253e+001	0	0	0	0	0	0	2620.67	1	1	49.1849	31
DATA	2620	31	70	0	0	A_64_P093894	A_64_P093894	11630.9	404.307	4.997232e+001	5.894131e+000	119	31	1.195933e+001	0	0	0	0	0	0	48.7764	1	1	49.1849	32.1111
DATA	2621	31	71	0	0	A_64_P073378	NM_001025287	11656.1	404.474	9.537927e+002	9.543079e+001	1006.5	34	1.030746e+001	0	0	0	0	0	0	928	1	1	49.8279	35.8571
DATA	2622	31	72	0	0	A_64_P096076	A_64_P096076	11681.5	404.5	1.114041e+002	1.626159e+001	129	35	2.106732e+001	0	0	0	0	0	0	108.005	1	1	57.5363	42.7037
DATA	2623	31	73	0	0	A_42_P471835	TC610276	11706.9	404.574	3.142011e+003	3.142170e+002	3090	43.5	1.141470e+001	0	0	0	0	0	0	3034.29	1	1	46.5243	42.1538
DATA	2624	31	74	0	0	A_42_P767737	AY724480	11732.2	404.394	4.001926e+003	4.002052e+002	3873	41	9.023212e+000	0	0	0	0	0	0	3848.24	1	1	47.5395	39.4688
DATA	2625	31	75	0	0	A_64_P016393	A_64_P016393	11757.3	404.563	4.069901e+003	4.070026e+002	3939	40	4.914992e+000	0	0	0	0	0	0	3895.97	1	1	48.2044	41.5714
DATA	2626	31	76	0	0	A_42_P803752	XM_580093	11783	404.545	2.304593e+001	3.945793e+000	96	40	7.954773e+000	0	0	0	0	0	0	21.9509	1	1	55.8519	39.8182
DATA	2627	31	77	0	0	A_42_P589025	NM_134363	11808.4	404.573	5.312570e+004	5.312570e+003	50894	40	1.075299e+001	0	0	0	0	0	0	50334.5	1	1	57.5363	40.6296
DATA	2628	31	78	0	0	A_64_P107938	NM_001000930	11833.4	404.789	1.043200e+001	3.401513e+000	83	39	9.176690e+000	0	0	0	0	0	0	9.82965	1	0	47.5395	39.7143
DATA	2629	31	79	0	0	A_64_P088817	A_64_P088817	11859.4	404.573	3.682591e+002	3.696971e+001	422	38	8.290362e+000	0	0	0	0	0	0	344.865	1	1	57.5363	39.5128
DATA	2630	31	80	0	0	A_64_P000579	A_64_P000579	11884.5	404.705	1.724916e+004	1.724919e+003	16151	42	8.478117e+000	0	0	0	0	0	0	16053.2	1	1	50.4627	42.0385
DATA	2631	31	81	0	0	A_44_P570046	TC630334	11910	404.545	4.295075e+002	4.307734e+001	473.5	45	1.048691e+001	0	0	0	0	0	0	397.05	1	1	55.8519	46.2414
DATA	2632	31	82	0	0	A_44_P431629	NM_001106835	11935.4	404.573	9.245801e+001	9.824907e+000	158	38	9.286827e+000	0	0	0	0	0	0	84.8741	1	1	57.5363	37.6129
DATA	2634	31	84	0	0	A_42_P485932	NM_001034927	11986.1	404.768	1.412507e+004	1.412511e+003	12945	38	9.614541e+000	0	0	0	0	0	0	12774	1	1	46.5243	38.4242
DATA	2635	31	85	66	1	DarkCorner	DarkCorner	12011.2	404.648	3.412312e+000	3.400211e+000	70	39	9.561497e+000	0	0	0	0	0	0	-3.7247	0	0	47.5395	38.8222
DATA	2636	32	1	66	1	DarkCorner	DarkCorner	9891.16	410.712	3.565342e+000	3.552699e+000	61	41	9.806232e+000	0	0	0	0	0	0	-4.53941	0	0	50.1463	41.2927
DATA	2637	32	2	0	0	A_64_P048366	ENSRNOT00000059330	9916.5	410.5	1.135120e+003	1.135680e+002	1028	40	1.038257e+001	0	0	0	0	0	0	970.661	1	1	52.9257	40.7419
DATA	2638	32	3	0	0	A_44_P1058980	NM_001012036	9941.94	410.304	2.565135e+003	2.565384e+002	2213	40	7.040173e+000	0	0	0	0	0	0	2185.71	1	1	46.1809	39.7241
DATA	2639	32	4	0	0	A_64_P062562	ENSRNOT00000027655	9967.16	410.269	4.761826e+001	5.963903e+000	109.5	42	8.166618e+000	0	0	0	0	0	0	40.4564	1	1	45.835	41.8718
DATA	2640	32	5	0	0	A_44_P490100	ENSRNOT00000043641	9992.89	410.5	2.485145e+001	4.373876e+000	88	40	8.411001e+000	0	0	0	0	0	0	21.0634	1	1	65	40.3077
DATA	2641	32	6	0	0	A_42_P473886	NM_001165922	10018.3	410.5	4.029270e+002	4.045372e+001	403.5	38	9.488031e+000	0	0	0	0	0	0	340.892	1	1	57.5363	38.9091
DATA	2642	32	7	0	0	A_64_P393339	ENSRNOT00000057753	10043.2	411.057	3.549389e+001	5.062836e+000	99	36	7.353777e+000	0	0	0	0	0	0	29.992	1	1	46.8651	37.6786
DATA	2643	32	8	0	0	A_44_P461154	NM_053819	10069.1	410.5	4.512460e+002	4.526903e+001	454	38	8.474140e+000	0	0	0	0	0	0	380.985	1	1	56.9804	39.6471
DATA	2644	32	9	0	0	A_42_P701991	NM_001100671	10094.4	410.466	3.467802e+003	3.467990e+002	2951.5	40	8.267829e+000	0	0	0	0	0	0	2926.95	1	1	49.1849	42.0968
DATA	2645	32	10	1028	1	(+)E1A_r60_1	E1A_r60_1	10119.1	410.553	3.626716e+000	3.614448e+000	68	40	9.049736e+000	0	0	0	0	0	0	0.553076	0	0	49.5074	39.9091
DATA	2646	32	11	0	0	A_44_P541230	ENSRNOT00000010675	10145.4	410.424	1.918526e+003	1.918866e+002	1691	35	7.870384e+000	0	0	0	0	0	0	1620.48	1	1	45.1352	35.575
DATA	2647	32	12	0	0	A_64_P004593	NM_001166761	10170.6	410.573	1.814439e+001	4.038717e+000	83	38	1.086511e+001	0	0	0	0	0	0	15.3407	1	1	57.5363	38.8667
DATA	2648	32	13	0	0	A_64_P018385	ENSRNOT00000063845	10196.2	410.589	1.336329e+001	3.843028e+000	77	38	1.096613e+001	0	0	0	0	0	0	11.314	1	0	48.5334	39.4516
DATA	2649	32	14	0	0	A_64_P017590	NM_001000096	10221.4	410.573	9.196220e+000	3.712735e+000	75	41	9.119164e+000	0	0	0	0	0	0	7.79933	1	0	57.5363	42.2973
DATA	2650	32	15	0	0	A_42_P810118	XM_001075984	10246.6	410.573	7.821748e+002	7.829981e+001	718.5	39.5	9.195986e+000	0	0	0	0	0	0	664.722	1	1	57.5363	40.6154
DATA	2651	32	16	0	0	A_42_P772157	NM_017020	10272	410.771	1.145622e+003	1.146182e+002	1028	35	6.716481e+000	0	0	0	0	0	0	975.928	1	1	46.8651	34.5556
DATA	2652	32	17	0	0	A_42_P542809	NM_021671	10297.7	410.761	5.254635e+002	5.266758e+001	514	37.5	9.726450e+000	0	0	0	0	0	0	448.845	1	1	47.2035	38.9063
DATA	2653	32	18	0	0	A_42_P645352	NM_001126371	10323	410.742	4.752032e+003	4.752165e+002	3954	34.5	1.005520e+001	0	0	0	0	0	0	4071.09	1	1	45.835	36.25
DATA	2654	32	19	0	0	A_64_P106933	NM_001130493	10348.3	411.242	5.331038e+001	6.404586e+000	113	40	9.047099e+000	0	0	0	0	0	0	45.8185	1	1	45.1352	39.9167
DATA	2655	32	20	0	0	A_42_P614175	NM_033237	10373.6	410.573	9.063344e+002	9.070245e+001	787.5	40	8.728768e+000	0	0	0	0	0	0	781.606	1	1	57.5363	40.4839
DATA	2656	32	21	0	0	A_64_P147190	NM_031840	10399	411.226	3.269352e+003	3.269541e+002	2870.5	41	8.907086e+000	0	0	0	0	0	0	2829.88	1	1	45.4864	39.5185
DATA	2657	32	22	0	0	A_43_P11268	NM_031762	10424.6	411.129	3.918807e+003	3.918964e+002	3397	37	9.466040e+000	0	0	0	0	0	0	3405.2	1	1	47.2035	37.0345
DATA	2658	32	23	0	0	A_64_P022215	A_64_P022215	10449.9	410.614	1.708787e+002	1.744200e+001	220	35.5	6.773454e+000	0	0	0	0	0	0	149.074	1	1	57.259	35.3824
DATA	2659	32	24	0	0	A_64_P001080	NM_001109379	10475.1	411.125	9.762020e+001	1.036452e+001	151	39	1.026350e+001	0	0	0	0	0	0	85.5202	1	1	45.4864	38.6857
DATA	2660	32	25	0	0	A_42_P468662	NM_001108886	10500.7	410.9	1.364090e+003	1.364531e+002	1258.5	40.5	8.235939e+000	0	0	0	0	0	0	1200.2	1	1	47.2035	40.1429
DATA	2661	32	26	0	0	A_42_P522285	NM_001044263	10526	411	3.427262e+002	3.444602e+001	366	40	9.189142e+000	0	0	0	0	0	0	302.885	1	1	46.8651	39.0286
DATA	2662	32	27	0	0	A_42_P478500	NM_177421	10551.5	411	1.744194e+005	1.744194e+004	155319	42	1.159237e+001	0	0	0	0	0	0	154847	1	1	54.1152	43.4375
DATA	2663	32	28	0	0	A_42_P739860	NM_133578	10577	411	2.941023e+003	2.941222e+002	2616	38	1.059883e+001	0	0	0	0	0	0	2623.12	1	1	46.8651	38.9091
DATA	2664	32	29	0	0	A_42_P708614	NM_001130505	10602.5	411	5.296182e+004	5.296183e+003	46797	41.5	1.051305e+001	0	0	0	0	0	0	47459.8	1	1	54.1152	43.4
DATA	2665	32	30	0	0	A_64_P067000	NM_001108721	10627.6	411.13	4.240907e+002	4.254422e+001	448.5	33	1.051722e+001	0	0	0	0	0	0	381.821	1	1	46.8651	34.9688
DATA	2666	32	31	0	0	A_44_P590748	NM_001109199	10652.9	411.127	4.958372e+001	5.996519e+000	112	38	9.160914e+000	0	0	0	0	0	0	44.8537	1	1	46.8651	39.1212
DATA	2667	32	32	0	0	A_42_P742797	NM_001106761	10678.5	411.265	3.391648e+003	3.391814e+002	3072	34	8.054267e+000	0	0	0	0	0	0	3082.96	1	1	46.5243	34.3939
DATA	2668	32	33	0	0	A_42_P761277	NM_001008297	10703.7	411.1	1.062314e+003	1.062839e+002	1015	39	5.653182e+000	0	0	0	0	0	0	970.21	1	1	47.2035	39.0385
DATA	2669	32	34	0	0	A_42_P503739	FQ231471	10729.2	411	1.679599e+004	1.679603e+003	15136	37.5	8.869063e+000	0	0	0	0	0	0	15413.4	1	1	46.8651	39.2813
DATA	2670	32	35	0	0	A_42_P635760	ENSRNOT00000023806	10754.5	411.056	9.102891e+003	9.102951e+002	8327.5	38	1.040777e+001	0	0	0	0	0	0	8393.06	1	1	48.5334	39.5313
DATA	2671	32	36	0	0	A_64_P136337	ENSRNOT00000064588	10779.9	411.104	4.026479e+003	4.026614e+002	3697	40	8.797391e+000	0	0	0	0	0	0	3729.99	1	1	46.8651	41.4138
DATA	2672	32	37	0	0	A_64_P128316	ENSRNOT00000062007	10805.5	411.352	1.947986e+001	3.812900e+000	87	38.5	9.504766e+000	0	0	0	0	0	0	18.1303	1	1	57.5363	38.5833
DATA	2673	32	38	0	0	A_64_P050799	A_64_P050799	10830.6	411.328	1.435018e+002	1.471648e+001	204	38	8.176514e+000	0	0	0	0	0	0	134.164	1	1	45.835	36.8462
DATA	2674	32	39	0	0	A_42_P701779	NM_001108048	10856.3	411.31	1.905070e+003	1.905347e+002	1739.5	36	6.674995e+000	0	0	0	0	0	0	1789.18	1	1	47.8731	36.5
DATA	2675	32	40	0	0	A_42_P604900	NM_199117	10881.6	411.479	4.405654e+003	4.405773e+002	4005.5	41	8.566031e+000	0	0	0	0	0	0	4155.76	1	1	48.2044	40.5758
DATA	2676	32	41	0	0	A_44_P1060444	NM_001106644	10906.9	411.104	3.749673e+003	3.749811e+002	3553	39	8.211359e+000	0	0	0	0	0	0	3551.97	1	1	46.8651	39.8438
DATA	2677	32	42	0	0	A_64_P090339	NM_001000756	10932.1	411.033	5.242078e+001	6.145391e+000	122	39	9.818679e+000	0	0	0	0	0	0	49.8613	1	1	45.1352	40.1613
DATA	2678	32	43	0	0	A_42_P770556	NM_033096	10957.8	411.353	6.859285e+003	6.859359e+002	6400	35	9.354548e+000	0	0	0	0	0	0	6550.98	1	1	46.8651	35.5152
DATA	2679	32	44	0	0	A_44_P606502	NM_001130502	10983.4	411.427	2.665572e+001	4.150818e+000	98	37	9.628615e+000	0	0	0	0	0	0	25.5568	1	1	57.5363	37.9091
DATA	2680	32	45	0	0	A_64_P372189	NM_212516	11008.6	411.427	5.526164e+004	5.526165e+003	52801.5	40.5	1.063723e+001	0	0	0	0	0	0	53177.6	1	1	57.5363	40.4333
DATA	2681	32	46	0	0	A_42_P540518	NM_199399	11034.2	411.392	3.416730e+003	3.416876e+002	3289	40	6.859109e+000	0	0	0	0	0	0	3299.54	1	1	48.5334	41.2813
DATA	2682	32	47	0	0	A_64_P158955	ENSRNOT00000020260	11059.4	411.427	2.180562e+001	3.829896e+000	95	39	1.150616e+001	0	0	0	0	0	0	21.1278	1	1	57.5363	40.0345
DATA	2683	32	48	0	0	A_44_P325841	NM_024130	11084.6	411.486	2.028222e+003	2.028464e+002	2019	40	1.123493e+001	0	0	0	0	0	0	1971.32	1	1	48.2044	40.9032
DATA	2684	32	49	0	0	A_64_P007743	XM_001071416	11110.3	411.5	1.084761e+002	1.128998e+001	178	42	9.976624e+000	0	0	0	0	0	0	105.747	1	1	57.5363	42.4595
DATA	2685	32	50	0	0	A_64_P136213	A_64_P136213	11135.2	411.31	5.205988e+000	3.164213e+000	76	38.5	1.025482e+001	0	0	0	0	0	0	5.0885	1	0	47.5395	41.25
DATA	2686	32	51	0	0	A_43_P17392	NM_001191693	11160.7	411.425	3.358770e+003	3.358914e+002	3282.5	39.5	8.232419e+000	0	0	0	0	0	0	3291.3	1	1	48.5334	40.5
DATA	2687	32	52	0	0	A_42_P708569	NM_001191837	11186.2	411.354	1.014067e+004	1.014072e+003	10131.5	38.5	1.008797e+001	0	0	0	0	0	0	9959.63	1	1	45.1352	39.7143
[truncated: 6,323,504 more chars]
