# Supplementary material for: Gene Expression in the Hippocampus in a Rat Model of Premenstrual Dysphoric Disorder After Treatment With Baixiangdan Capsules
Source: Front Psychol. 2018 Nov 13;9:2065. doi: 10.3389/fpsyg.2018.02065 (PMC6242977; doi:10.3389/fpsyg.2018.02065)
Supplement: Supplementary file 2 [file Data_Sheet_2.ZIP › Raw Data Files/17_4.txt]

TYPE	text	text	text	integer	text	float	float	text	integer	text	text	integer	integer	integer	integer	float	float	float	float	float	float	text	text	text	text	text	text	text	text	text	text	text	integer	integer	integer	text	integer	boolean
FEPARAMS	Protocol_Name	Protocol_date	Scan_ScannerName	Scan_NumChannels	Scan_Date	Scan_MicronsPerPixelX	Scan_MicronsPerPixelY	Scan_OriginalGUID	Scan_NumScanPass	Grid_Name	Grid_Date	Grid_NumSubGridRows	Grid_NumSubGridCols	Grid_NumRows	Grid_NumCols	Grid_RowSpacing	Grid_ColSpacing	Grid_OffsetX	Grid_OffsetY	Grid_NomSpotWidth	Grid_NomSpotHeight	Grid_GenomicBuild	FeatureExtractor_Barcode	FeatureExtractor_Sample	FeatureExtractor_ScanFileName	FeatureExtractor_ArrayName	FeatureExtractor_ScanFileGUID	FeatureExtractor_DesignFileName	FeatureExtractor_ExtractionTime	FeatureExtractor_UserName	FeatureExtractor_ComputerName	FeatureExtractor_Version	FeatureExtractor_IsXDRExtraction	FeatureExtractor_ColorMode	FeatureExtractor_QCReportType	DyeNorm_NormFilename	DyeNorm_NormNumProbes	Grid_IsGridFile
DATA	GE1_1100_Jul11 (Read Only)	1-Jul-2011 22:30	Agilent Technologies Scanner G2505C US10450393	1	07-19-2013 10:55:47	5	5	891b3bcf-7e8d-49b3-9f1b-211571655d1e	1	028282_D_F_20120224	24-Feb-2012 00:00	1	1	532	85	73.3235	63.5	0	36.6617	65	65	rn4:RGSCv3.4:Nov2004	1_3		M:\2013.07.19 Rat GE 1-color 4x44k(sunpeng)\\US10450393_S01.tif	US10450393_S01	0de24e3c-411a-4c92-b222-bf3524e92ef4	028282_D_F_20120224.xml	19-Jul-2013 11:52:30	admin	KCSY01	11.0.1.1	0	0	0		0	0
*
TYPE	float	float	float	integer	integer	float	float	float	integer	float	float	float	integer	float	float	integer	integer	integer	integer	integer	float	float	float	integer	float	float	float	float	float	integer	integer	float	float	float	float	float	integer	float	float	float	float	integer	float	float	float	float	float	integer	float	float	float	float	float	float	float	integer	float	integer	float	float	float	float	integer	float	float	float	float	text	float	float	float	float	float	float	float	float	float	float	float	float	float	float	float	float	float	float	float	float	float	integer	integer	integer	integer	float	integer	text	integer	text	float	float	float	integer	boolean	float	float	boolean	float	boolean	float	boolean	float	boolean	float	boolean	float	boolean	float	boolean	float	boolean	float	boolean	float	boolean	float	boolean
STATS	gDarkOffsetAverage	gDarkOffsetMedian	gDarkOffsetStdDev	gDarkOffsetNumPts	gSaturationValue	gAvgSig2BkgeQC	gAvgSig2BkgNegCtrl	gRatioSig2BkgeQC_NegCtrl	gNumSatFeat	gLocalBGInlierNetAve	gLocalBGInlierAve	gLocalBGInlierSDev	gLocalBGInlierNum	gGlobalBGInlierAve	gGlobalBGInlierSDev	gGlobalBGInlierNum	gNumFeatureNonUnifOL	gNumPopnOL	gNumNonUnifBGOL	gNumPopnBGOL	gOffsetUsed	gGlobalFeatInlierAve	gGlobalFeatInlierSDev	gGlobalFeatInlierNum	AnyColorPrcntFeatNonUnifOL	AnyColorPrcntBGNonUnifOL	AnyColorPrcntFeatPopnOL	AnyColorPrcntBGPopnOL	TotalPrcntFeatOL	gNumNegBGSubFeat	gNonCtrlNumNegFeatBGSubSig	gSpatialDetrendRMSFit	gSpatialDetrendRMSFilteredMinusFit	gSpatialDetrendSurfaceArea	gSpatialDetrendVolume	gSpatialDetrendAveFit	gNonCtrlNumSatFeat	gNonCtrl99PrcntNetSig	gNonCtrl50PrcntNetSig	gNonCtrl1PrcntNetSig	gNonCtrlMedPrcntCVBGSubSig	gCtrleQCNumSatFeat	gCtrleQC99PrcntNetSig	gCtrleQC50PrcntNetSig	gCtrleQC1PrcntNetSig	geQCMedPrcntCVBGSubSig	geQCSig2BkgLow2	gNegCtrlNumInliers	gNegCtrlAveNetSig	gNegCtrlSDevNetSig	gNegCtrlAveBGSubSig	gNegCtrlSDevBGSubSig	gAveNumPixOLLo	gAveNumPixOLHi	gPixCVofHighSignalFeat	gNumHighSignalFeat	AddErrorEstimateGreen	TotalNumFeatures	ROIHeight	ROIWidth	CentroidDiffX	CentroidDiffY	NumFoundFeat	MaxNonUnifEdges	MaxSpotNotFoundEdges	gMultDetrendRMSFit	gMultDetrendSurfaceAverage	eQCLowSigName2	eQCOneColorLogLowSignal	eQCOneColorLogLowSignalError	eQCOneColorLogHighSignal	eQCOneColorLinFitLogLowConc	eQCOneColorLinFitLogLowSignal	eQCOneColorLinFitLogHighConc	eQCOneColorLinFitLogHighSignal	eQCOneColorLinFitSlope	eQCOneColorLinFitIntercept	eQCOneColorLinFitRSQ	eQCOneColorSpikeDetectionLimit	gNonCtrl50PrcntBGSubSig	gCtrleQC50PrcntBGSubSig	gMedPrcntCVProcSignal	geQCMedPrcntCVProcSignal	gOutlierFlagger_Auto_FeatB_Term	gOutlierFlagger_Auto_FeatC_Term	gOutlierFlagger_Auto_BgndB_Term	gOutlierFlagger_Auto_BgndC_Term	OutlierFlagger_FeatChiSq	OutlierFlagger_BgndChiSq	GriddingStatus	IsGoodGrid	NumGeneNonUnifOL	TotalNumberOfReplicatedGenes	gPercentileIntensityProcessedSignal	ExtractionStatus	QCMetricResults	gNonCtrlNumWellAboveBG	ImageDepth	AFHold	gPMTVolts	GlassThickness	gDDN	GridHasBeenOptimized	gNegCtrlSpread	Metric_IsGoodGrid	Metric_IsGoodGrid_IsInRange	Metric_AnyColorPrcntFeatNonUnifOL	Metric_AnyColorPrcntFeatNonUnifOL_IsInRange	Metric_gNegCtrlAveNetSig	Metric_gNegCtrlAveNetSig_IsInRange	Metric_gNegCtrlAveBGSubSig	Metric_gNegCtrlAveBGSubSig_IsInRange	Metric_gNegCtrlSDevBGSubSig	Metric_gNegCtrlSDevBGSubSig_IsInRange	Metric_gSpatialDetrendRMSFilteredMinusFit	Metric_gSpatialDetrendRMSFilteredMinusFit_IsInRange	Metric_gNonCntrlMedCVProcSignal	Metric_gNonCntrlMedCVProcSignal_IsInRange	Metric_gE1aMedCVProcSignal	Metric_gE1aMedCVProcSignal_IsInRange	Metric_absGE1E1aSlope	Metric_absGE1E1aSlope_IsInRange	Metric_DetectionLimit	Metric_DetectionLimit_IsInRange	Metric_gDDN	Metric_gDDN_IsInRange
DATA	7.24727	7.24727	1.71313	0	778248	1.42595	1.45706	0.978646	0	39.5614	46.8086	4.62416	43251	46.8086	4.62416	43251	7	851	32	1003	7.24727	4363.91	12617.8	43397	0.0158178	0.0723098	1.92299	2.26646	0.0163258	1383	721	5.65065	3.88791	1.00319	9.09959	71.4378	0	62746.1	545.753	59.8027	7.34351	0	259.483	71.6143	53.4758	-1	1.52535	142	55.7999	4.25125	-7.48416	3.05471	0.649026	0.602341	0.117487	6484	3.88791	44254	4.36651	7.61785	0.694306	0.926411	41925	0	0.0902256	0.0602447	1.00001	(+)E1A_r60_3	0	0	0	0	0	0	0	0	0	0	-1	482.042	7.61832	3.0862	-1	1208.13	105.111	128.75	68.9987	1.94549	2.49987	0	1	6	30367	3243.01	1	ExtractionEvaluate	38334	20 Bit	0	354	968.949	0	0	12.1113	1	1	0.0158178	1	55.7999	0	-7.48416	1	3.05471	1	3.88791	1	3.0862	1	-1	0	0	0	-1	0	0	1
*
TYPE	integer	integer	integer	integer	integer	text	text	float	float	float	float	float	float	float	boolean	boolean	boolean	boolean	boolean	boolean	float	boolean	boolean	float	float
FEATURES	FeatureNum	Row	Col	SubTypeMask	ControlType	ProbeName	SystematicName	PositionX	PositionY	gProcessedSignal	gProcessedSigError	gMedianSignal	gBGMedianSignal	gBGPixSDev	gIsSaturated	gIsFeatNonUnifOL	gIsBGNonUnifOL	gIsFeatPopnOL	gIsBGPopnOL	IsManualFlag	gBGSubSignal	gIsPosAndSignif	gIsWellAboveBG	SpotExtentX	gBGMeanSignal
DATA	1	1	1	260	1	GE_BrightCorner	GE_BrightCorner	6737.49	180.563	4.152228e+004	4.152230e+003	35749	38	8.816776e+000	0	0	0	0	0	0	35895.1	1	1	56.1362	38.8139
DATA	2	1	2	66	1	DarkCorner	DarkCorner	6762.58	180.573	5.821259e+000	4.512009e+000	68	40	8.684215e+000	0	0	0	0	0	0	5.05835	1	0	57.5363	40.1949
DATA	3	1	3	66	1	DarkCorner	DarkCorner	6788.09	180.614	4.470576e+000	4.460031e+000	64	39	8.604100e+000	0	0	0	0	0	0	2.41265	0	0	57.259	39.2673
DATA	4	1	4	66	1	DarkCorner	DarkCorner	6813.5	180.648	4.448452e+000	4.429439e+000	61	39	8.674386e+000	0	0	0	0	0	0	-2.97904	0	0	57.5363	39.5966
DATA	5	1	5	66	1	DarkCorner	DarkCorner	6838.59	180.814	4.427236e+000	4.408314e+000	62	38	8.398438e+000	0	0	0	0	0	0	-0.743748	0	0	47.2035	38.2257
DATA	6	1	6	66	1	DarkCorner	DarkCorner	6864.02	180.75	4.406677e+000	4.387842e+000	61	38	8.549118e+000	0	0	0	0	0	0	-0.284147	0	0	36.5637	38.8015
DATA	7	1	7	66	1	DarkCorner	DarkCorner	6889.5	181	4.386642e+000	4.367894e+000	59	38	8.789723e+000	0	0	0	0	0	0	-2.83012	0	0	54.1152	38.8802
DATA	8	1	8	66	1	DarkCorner	DarkCorner	6915	181	4.367605e+000	4.348938e+000	61.5	38	7.876909e+000	0	0	0	0	0	0	-1.01684	0	0	54.9904	38.006
DATA	9	1	9	66	1	DarkCorner	DarkCorner	6940.32	181.097	4.349467e+000	4.330877e+000	59.5	38	8.298534e+000	0	0	0	0	0	0	-3.39753	0	0	52.3208	38.4048
DATA	10	1	10	66	1	DarkCorner	DarkCorner	6965.5	181	4.332413e+000	4.315567e+000	64	38	9.134489e+000	0	0	0	0	0	0	1.08244	0	0	65	38.8627
DATA	11	1	11	66	1	DarkCorner	DarkCorner	6991.17	180.746	4.316007e+000	4.297560e+000	60.5	37	9.128799e+000	0	0	0	0	0	0	-1.36803	0	0	45.1352	37.5977
DATA	12	1	12	0	0	A_64_P076162	A_64_P076162	7016.37	181	7.688004e+001	8.800091e+000	135	37	8.279036e+000	0	0	0	0	0	0	69.8033	1	1	46.5243	37.2004
DATA	13	1	13	0	0	A_64_P002176	NM_001170551	7041.85	180.893	7.588612e+002	7.600602e+001	744	38	8.053518e+000	0	0	0	0	0	0	691.352	1	1	50.1463	38.1218
DATA	14	1	14	0	0	A_42_P664913	NM_001108400	7067.38	181	7.557273e+002	7.569235e+001	735	37	8.383342e+000	0	0	0	0	0	0	690.723	1	1	48.5334	37.5426
DATA	15	1	15	0	0	A_43_P13320	NM_138880	7092.69	180.785	1.980870e+001	4.681064e+000	81.5	37	8.504931e+000	0	0	0	0	0	0	18.1583	1	0	45.4864	37.5219
DATA	16	1	16	0	0	A_64_P126523	A_64_P126523	7117.96	181.014	5.717753e+001	7.112033e+000	116	37	8.761099e+000	0	0	0	0	0	0	52.5602	1	1	46.8651	37.9068
DATA	17	1	17	0	0	A_64_P038045	XM_002730109	7143.64	180.946	3.114988e+001	5.244003e+000	93	36	7.374588e+000	0	0	0	0	0	0	28.7083	1	1	49.1849	36.6911
DATA	18	1	18	0	0	A_43_P11804	NM_017066	7169	181	3.653747e+004	3.653750e+003	33822	36	7.615313e+000	0	0	0	0	0	0	33752.4	1	1	54.9904	36.8026
DATA	19	1	19	0	0	A_44_P808710	XM_001069205	7194.51	181.273	6.615406e+001	7.835869e+000	126.5	37	8.216002e+000	0	0	0	0	0	0	61.2432	1	1	48.8603	36.9529
DATA	20	1	20	0	0	A_64_P142111	NM_001100887	7219.57	181.311	1.302136e+003	1.302811e+002	1285	37	8.736623e+000	0	0	0	0	0	0	1207.72	1	1	48.5334	37.3837
DATA	21	1	21	0	0	A_64_P095642	A_64_P095642	7245.09	180.672	1.629019e+002	1.681923e+001	216	36	8.220548e+000	0	0	0	0	0	0	151.329	1	1	45.1352	37.5094
DATA	22	1	22	0	0	A_42_P735279	NM_001004446	7270.5	181.352	2.712528e+004	2.712531e+003	25439.5	37	7.900476e+000	0	0	0	0	0	0	25236.2	1	1	57.5363	37.2337
DATA	23	1	23	0	0	A_44_P902822	XM_001063709	7295.92	180.875	5.646944e+001	7.022273e+000	120	38	8.281451e+000	0	0	0	0	0	0	52.5959	1	1	45.835	37.6485
DATA	24	1	24	0	0	A_42_P563843	NM_022263	7321.42	181.427	4.187897e+000	4.172831e+000	65	37	7.982866e+000	0	0	0	0	0	0	1.43366	0	0	57.5363	36.9252
DATA	25	1	25	0	0	A_42_P610788	NM_031544	7346.4	181.147	8.018069e+003	8.018177e+002	7389	36	7.989789e+000	0	0	0	1	0	0	7480.66	1	1	48.8603	36.7762
DATA	26	1	26	0	0	A_44_P242429	NM_001134842	7371.69	181.338	3.436655e+003	3.436908e+002	3171.5	37	8.236202e+000	0	0	0	0	0	0	3207.9	1	1	48.5334	37.1318
DATA	27	1	27	0	0	A_64_P020571	NM_001031659	7397.26	181.289	6.316323e+002	6.330035e+001	609	37	8.666272e+000	0	0	0	0	0	0	589.726	1	1	49.5074	37.7886
DATA	28	1	28	0	0	A_42_P518462	NM_001007020	7422.68	181.395	1.188530e+004	1.188538e+003	10994	37	9.022705e+000	0	0	0	0	0	0	11096.9	1	1	49.5074	38.5773
DATA	29	1	29	0	0	A_42_P469751	XM_001054007	7448.09	180.818	5.258554e+003	5.258719e+002	4917.5	38	8.385383e+000	0	0	0	0	0	0	4908.19	1	1	45.835	38.636
DATA	30	1	30	0	0	A_44_P209459	NM_022387	7473.22	181.176	1.251255e+004	1.251262e+003	11669.5	38	8.440393e+000	0	0	0	0	0	0	11673.8	1	1	48.2044	38.0911
DATA	31	1	31	0	0	A_64_P018547	NM_001108717	7499.11	181.5	9.021802e+002	9.031434e+001	887	36	7.942656e+000	0	0	0	0	0	0	841.124	1	1	56.9804	36.7867
DATA	32	1	32	0	0	A_64_P111513	A_64_P111513	7524.55	181.127	8.109187e+000	4.252344e+000	74	36	7.686897e+000	0	0	0	0	0	0	7.55283	1	0	47.8731	36.5175
DATA	33	1	33	0	0	A_42_P493925	NM_198785	7550.23	181.244	6.539226e+002	6.552567e+001	659.5	36	7.951033e+000	0	0	0	1	0	0	608.334	1	1	50.1463	36.6829
DATA	34	1	34	0	0	A_64_P049828	NM_012543	7574.99	181.616	1.769990e+003	1.770485e+002	1709	35	8.398501e+000	0	0	0	0	0	0	1644.39	1	1	48.8603	36.0077
DATA	35	1	35	0	0	A_64_P137927	NM_001191885	7600.31	181.662	2.669545e+002	2.702254e+001	314	35	8.139463e+000	0	0	0	0	0	0	247.606	1	1	48.5334	36.0331
DATA	36	1	36	0	0	A_43_P19848	NM_001106018	7626.11	181.5	5.869447e+001	7.217246e+000	123	37	8.476983e+000	0	0	0	0	0	0	54.3358	1	1	56.9804	37.506
DATA	37	1	37	0	0	A_44_P308673	NM_139108	7651.46	181.296	4.036677e+002	4.058558e+001	445.5	36.5	8.077438e+000	0	0	0	0	0	0	372.901	1	1	47.8731	37.0804
DATA	38	1	38	0	0	A_64_P004269	NM_001191660	7676.61	181.362	2.272152e+003	2.272544e+002	2159	37	8.220504e+000	0	0	0	0	0	0	2094.19	1	1	47.5395	37.3384
DATA	39	1	39	0	0	A_42_P543670	NM_012572	7701.99	181.452	3.359715e+002	3.386226e+001	355	36	8.953763e+000	0	0	0	0	0	0	308.878	1	1	48.5334	36.6065
DATA	40	1	40	0	0	A_64_P164696	TC605704	7727.5	181.5	4.258772e+000	4.242158e+000	68	36	8.957533e+000	0	0	0	0	0	0	1.06409	0	0	57.5363	36.5957
DATA	41	1	41	0	0	A_64_P055763	NM_001191822	7752.68	181.395	1.086111e+004	1.086119e+003	9858	36	8.576768e+000	0	0	0	0	0	0	9928.71	1	1	49.5074	36.5
DATA	42	1	42	0	0	A_64_P068622	NM_001013056	7778.11	181.648	1.884328e+003	1.884811e+002	1735	35	7.798696e+000	0	0	0	0	0	0	1717.2	1	1	47.8731	35.5242
DATA	43	1	43	0	0	A_44_P915877	XM_001065403	7803.5	181.5	3.808979e+002	3.832958e+001	415	35	7.835097e+000	0	0	0	0	0	0	345.952	1	1	50.4627	36.2128
DATA	44	1	44	0	0	A_42_P647599	NM_024129	7829.05	181.846	9.868976e+002	9.878321e+001	942	35	8.071030e+000	0	0	0	1	0	0	893.215	1	1	49.5074	35.8557
DATA	45	1	45	0	0	A_42_P798776	XM_002725203	7854.57	181.157	5.779205e+003	5.779366e+002	5219.5	36	8.531705e+000	0	0	0	0	0	0	5210.67	1	1	47.5395	36.5934
DATA	46	1	46	0	0	A_42_P781735	NM_053319	7880	181.545	1.080792e+005	1.080792e+004	95042	38	9.810049e+000	0	0	0	0	0	0	97072.8	1	1	55.8519	39.0237
DATA	47	1	47	0	0	A_42_P553611	TC630296	7905.11	181.5	5.037708e+003	5.037895e+002	4546.5	37	9.101545e+000	0	0	0	0	0	0	4506.54	1	1	47.8731	37.7407
DATA	48	1	48	0	0	A_43_P12729	NM_032615	7930.54	181.614	5.955533e+003	5.955693e+002	5296	36	8.003130e+000	0	0	0	0	0	0	5305.21	1	1	47.5395	36.2519
DATA	49	1	49	0	0	A_42_P507072	FQ213070	7956.12	181.603	5.329906e+003	5.330086e+002	4717	36	7.980321e+000	0	0	0	0	0	0	4727.02	1	1	48.5334	36.0402
DATA	50	1	50	0	0	A_42_P645467	NM_001108804	7981.54	181.973	4.502437e+001	6.297789e+000	108	36	8.291998e+000	0	0	0	0	0	0	39.7533	1	1	48.5334	36.174
DATA	51	1	51	0	0	A_42_P738431	NM_019175	8006.6	181.853	2.452930e+003	2.453329e+002	2127	35	8.562424e+000	0	0	0	0	0	0	2155.8	1	1	48.8603	35.8268
DATA	52	1	52	0	0	A_42_P712297	NM_001135583	8032	181.729	7.082286e+003	7.082426e+002	6068	37	8.492328e+000	0	0	0	0	0	0	6194.57	1	1	46.8651	36.6426
DATA	53	1	53	0	0	A_42_P657538	NM_001008362	8057.57	181.392	3.821233e+003	3.821494e+002	3214.5	36	8.604092e+000	0	0	0	0	0	0	3325.65	1	1	49.1849	36.2664
DATA	54	1	54	0	0	A_42_P515405	NM_212505	8083.11	181.789	7.759556e+002	7.772533e+001	736	36	7.965702e+000	0	0	0	1	0	0	671.961	1	1	46.8651	36.0978
DATA	55	1	55	0	0	A_64_P089886	NM_053476	8108.11	181.648	5.454944e+003	5.455131e+002	4681	36	7.898401e+000	0	0	0	0	0	0	4700.06	1	1	47.8731	36.0058
DATA	56	1	56	0	0	A_42_P528580	NM_001107528	8133.48	181.638	7.112760e+003	7.112905e+002	6081	35	8.139368e+000	0	0	0	0	0	0	6096.69	1	1	47.5395	36.08
DATA	57	1	57	0	0	A_43_P14285	NM_001034145	8159.31	181.662	1.079275e+004	1.079284e+003	9275	35	8.540312e+000	0	0	0	0	0	0	9201.47	1	1	48.5334	36.4762
DATA	58	1	58	0	0	A_42_P616287	NM_001134555	8184.44	181.973	3.183581e+002	3.216418e+001	325	36	7.801588e+000	0	0	0	0	0	0	270	1	1	48.5334	36.1621
DATA	59	1	59	0	0	A_42_P496411	NM_001109410	8209.91	181.896	5.579034e+003	5.579224e+002	4730	36	7.762680e+000	0	0	0	0	0	0	4705.97	1	1	46.8651	35.9302
DATA	60	1	60	0	0	A_44_P494310	NM_001009604	8235.38	182	7.651547e+003	7.651687e+002	6143	36	8.370279e+000	0	0	0	0	0	0	6419.11	1	1	48.5334	36.8967
DATA	61	1	61	0	0	A_42_P645142	NM_019375	8260.59	181.732	7.658202e+002	7.672366e+001	707	37	8.612413e+000	0	0	0	1	0	0	638.957	1	1	47.5395	37.6836
DATA	62	1	62	0	0	A_64_P042132	AABR03024196	8286.35	181.914	1.807927e+004	1.807933e+003	14987	37	8.449468e+000	0	0	0	0	0	0	15000.9	1	1	49.5074	37.6815
DATA	63	1	63	0	0	A_42_P508085	NM_001009620	8311.28	181.905	4.332816e+003	4.333073e+002	3573	36	8.712859e+000	0	0	0	0	0	0	3575.69	1	1	48.8603	36.7241
DATA	64	1	64	0	0	A_64_P051159	NM_001100684	8336.69	182.014	1.720010e+003	1.720662e+002	1463	36	8.128876e+000	0	0	0	0	0	0	1411.7	1	1	47.2035	36.2776
DATA	65	1	65	0	0	A_64_P124041	ENSRNOT00000019667	8362.31	181.986	1.316059e+002	1.399607e+001	175	36	8.176223e+000	0	0	0	0	0	0	107.42	1	1	47.2035	36.9344
DATA	66	1	66	0	0	A_64_P131122	XR_086302	8387.69	181.931	9.085539e+001	1.027056e+001	142.5	37	8.208998e+000	0	0	0	0	0	0	73.7558	1	1	48.2044	37.2061
DATA	67	1	67	0	0	A_64_P021601	NM_031737	8413	182	3.165623e+002	3.202033e+001	330	36	8.080465e+000	0	0	0	0	0	0	255.611	1	1	46.8651	36.3057
DATA	68	1	68	0	0	A_44_P776423	NM_001017386	8438.41	182.092	1.909292e+004	1.909298e+003	15091.5	36	7.475106e+000	0	0	0	0	0	0	15335.1	1	1	49.1849	36.6673
DATA	69	1	69	0	0	A_64_P120445	NM_080694	8464	182	4.880084e+001	6.891786e+000	107	36	8.294782e+000	0	0	0	0	0	0	38.9888	1	1	54.9904	36.4581
DATA	70	1	70	0	0	A_42_P772878	NM_001011936	8489.17	182	4.532810e+003	4.533074e+002	3641.5	36	8.052536e+000	0	0	0	1	0	0	3603	1	1	46.8651	36.1845
DATA	71	1	71	0	0	A_42_P736315	NM_001108321	8514.44	181.972	2.316148e+003	2.316670e+002	1838	36	7.776404e+000	0	0	0	0	0	0	1831.83	1	1	48.2044	36.5532
DATA	73	1	73	0	0	A_64_P041004	NM_001108599	8565.54	182.118	2.097571e+004	2.097577e+003	16406.5	38	8.357962e+000	0	0	0	0	0	0	16429.4	1	1	49.8279	38.8268
DATA	74	1	74	0	0	A_42_P494276	NM_001109663	8590.81	182.467	1.296483e+003	1.297442e+002	1043.5	38	8.531554e+000	0	0	0	0	0	0	1010.92	1	1	49.5074	39.2039
DATA	75	1	75	66	1	DarkCorner	DarkCorner	8616.5	182.352	5.030137e+000	5.008638e+000	63	37	8.193314e+000	0	0	0	0	0	0	-5.79805	0	0	57.5363	37.4008
DATA	76	1	76	66	1	DarkCorner	DarkCorner	8641.58	182.427	5.051073e+000	5.029485e+000	60	36	7.990018e+000	0	0	0	0	0	0	-7.57819	0	0	65	37.0159
DATA	77	1	77	66	1	DarkCorner	DarkCorner	8667.42	182.427	5.071697e+000	5.050020e+000	60	36	8.110854e+000	0	0	0	0	0	0	-7.84893	0	0	57.5363	36.7965
DATA	78	1	78	66	1	DarkCorner	DarkCorner	8692.47	182.017	5.091055e+000	5.069296e+000	61.5	37	8.128084e+000	0	0	0	0	0	0	-7.76693	0	0	43.7019	37.2231
DATA	79	1	79	66	1	DarkCorner	DarkCorner	8718	182.455	5.108600e+000	5.086766e+000	61.5	36	7.781994e+000	0	0	0	0	0	0	-7.70832	0	0	55.8519	36.3065
DATA	80	1	80	66	1	DarkCorner	DarkCorner	8743.69	182.056	5.125858e+000	5.103949e+000	59	37	8.423149e+000	0	0	0	0	0	0	-9.9537	0	0	47.8731	37.6344
DATA	81	1	81	66	1	DarkCorner	DarkCorner	8768.58	182.427	5.140272e+000	5.118302e+000	62.5	37	8.485825e+000	0	0	0	0	0	0	-6.06852	0	0	57.5363	37.0256
DATA	82	1	82	66	1	DarkCorner	DarkCorner	8794.39	182.719	5.153725e+000	5.131698e+000	60.5	36	8.439068e+000	0	0	0	0	0	0	-8.17497	0	0	54.1152	36.8583
DATA	83	1	83	66	1	DarkCorner	DarkCorner	8819.52	182.317	5.165992e+000	5.143912e+000	59	35	8.314541e+000	0	0	0	0	0	0	-10.5359	0	0	44.4243	35.8095
DATA	84	1	84	260	1	GE_BrightCorner	GE_BrightCorner	8844.89	182.5	5.281656e+004	5.281658e+003	39028	36	8.372084e+000	0	0	0	0	0	0	39844.1	1	1	56.9804	36.0137
DATA	85	1	85	260	1	GE_BrightCorner	GE_BrightCorner	8870.42	182.427	5.114318e+004	5.114320e+003	38009	36	8.087166e+000	0	0	0	0	0	0	38519.9	1	1	57.5363	35.9212
DATA	86	2	1	260	1	GE_BrightCorner	GE_BrightCorner	6749.62	188.081	4.218180e+004	4.218182e+003	36046	41	9.180326e+000	0	0	0	0	0	0	36611.5	1	1	51.4001	41.5407
DATA	87	2	2	66	1	DarkCorner	DarkCorner	6775.42	188.427	4.475089e+000	4.458809e+000	63	40	8.571718e+000	0	0	0	0	0	0	1.38979	0	0	57.5363	39.9158
DATA	88	2	3	66	1	DarkCorner	DarkCorner	6800.39	188.493	4.453185e+000	4.434151e+000	62	40	9.941974e+000	0	0	0	0	0	0	-0.454687	0	0	47.2035	41.3892
DATA	89	2	4	66	1	DarkCorner	DarkCorner	6826.23	188.474	4.431322e+000	4.412382e+000	57	39	8.101999e+000	0	0	0	0	0	0	-5.22299	0	0	49.8279	39.4388
DATA	90	2	5	66	1	DarkCorner	DarkCorner	6851.75	188.444	4.410493e+000	4.391643e+000	62	39	9.134794e+000	0	0	0	0	0	0	-1.08947	0	0	48.5334	38.823
DATA	91	2	6	66	1	DarkCorner	DarkCorner	6877.07	188.486	4.390540e+000	4.371775e+000	62.5	40	8.985481e+000	0	0	0	0	0	0	-1.88418	0	0	47.8731	40.1476
DATA	92	2	7	66	1	DarkCorner	DarkCorner	6902.42	188.427	4.371432e+000	4.352749e+000	57.5	39	8.693502e+000	0	0	0	0	0	0	-5.04032	0	0	57.5363	39.47
DATA	93	2	8	66	1	DarkCorner	DarkCorner	6927.58	188.427	4.353223e+000	4.334618e+000	58	38	7.782541e+000	0	0	0	0	0	0	-3.07653	0	0	57.5363	38.1786
DATA	94	2	9	66	1	DarkCorner	DarkCorner	6953.33	188.5	7.655697e+000	4.384220e+000	66	38	7.719295e+000	0	0	0	0	0	0	6.89499	1	0	57.5363	39.0498
DATA	95	2	10	66	1	DarkCorner	DarkCorner	6978.5	188.5	4.318865e+000	4.300406e+000	59	40	9.522142e+000	0	0	0	0	0	0	-5.74068	0	0	57.5363	40.2967
DATA	96	2	11	0	0	A_44_P212746	ENSRNOT00000049707	7003.89	188.5	2.260691e+001	4.844492e+000	83.5	37	8.586494e+000	0	0	0	0	0	0	20.5135	1	1	65	36.701
DATA	97	2	12	0	0	A_64_P103615	NM_001107179	7029.42	188.427	1.521530e+002	1.580305e+001	204	38	8.384129e+000	0	0	0	0	0	0	138.545	1	1	57.5363	39.1263
DATA	98	2	13	0	0	A_44_P550697	NM_001106400	7054.58	188.427	4.502896e+002	4.522964e+001	469	37	8.607393e+000	0	0	0	0	0	0	411.349	1	1	57.5363	37.1773
DATA	99	2	14	0	0	A_64_P045429	A_64_P045429	7079.94	188.5	9.313358e+001	1.023429e+001	152	37	8.542802e+000	0	0	0	0	0	0	85.3416	1	1	48.5334	37.5051
DATA	100	2	15	0	0	A_64_P075175	ENSRNOT00000044322	7105.49	188.074	2.910279e+002	2.940873e+001	330.5	38	1.006581e+001	0	0	0	0	0	0	267.431	1	1	47.2035	39.2642
DATA	101	2	16	0	0	A_44_P472801	NM_173121	7130.48	188.151	3.218042e+003	3.218319e+002	3022.5	37	7.075320e+000	0	0	0	0	0	0	2964.87	1	1	47.8731	36.6985
DATA	102	2	17	0	0	A_42_P491486	NM_022533	7155.97	188.442	5.841787e+003	5.841939e+002	5429	37	7.766687e+000	0	0	0	0	0	0	5395.55	1	1	49.1849	37.3092
DATA	103	2	18	0	0	A_43_P12736	NM_033299	7181.5	188.5	1.271597e+002	1.339167e+001	178.5	38	7.903597e+000	0	0	0	0	0	0	117.708	1	1	57.5363	38.6085
DATA	104	2	19	0	0	A_64_P158790	A_64_P158790	7207.11	188.5	3.977033e+004	3.977035e+003	37528	38.5	9.191288e+000	0	0	0	0	0	0	36887.8	1	1	56.9804	38.1796
DATA	105	2	20	0	0	A_44_P229481	NM_001191077	7232.32	188.576	3.166096e+002	3.193628e+001	368	37	8.890187e+000	0	0	0	0	0	0	294.176	1	1	45.4864	38.641
DATA	106	2	21	0	0	A_64_P133836	ENSRNOT00000039319	7257.67	188.5	3.868389e+001	5.693929e+000	102.5	37	7.820450e+000	0	0	0	0	0	0	35.9973	1	1	57.5363	37.5025
DATA	107	2	22	0	0	A_43_P13137	NM_130818	7283.27	188.581	1.221570e+001	4.347750e+000	78	38	8.860408e+000	0	0	0	0	0	0	11.3822	1	0	48.8603	38.9286
DATA	108	2	23	0	0	A_42_P586141	NM_017035	7308.37	188.411	3.830610e+002	3.853222e+001	418	38	8.040841e+000	0	0	0	0	0	0	357.29	1	1	48.5334	37.0145
DATA	109	2	24	0	0	A_44_P142850	NM_001106975	7334	188.545	7.002891e+001	8.147778e+000	131	36	7.623782e+000	0	0	0	0	0	0	65.3728	1	1	65	36.9194
DATA	110	2	25	0	0	A_44_P1042504	NM_001044232	7359.15	188.754	2.286048e+002	2.323632e+001	274.5	38	8.512130e+000	0	0	0	0	0	0	213.534	1	1	45.835	37.6699
DATA	111	2	26	0	0	A_42_P476474	NM_001033926	7384.63	188.64	4.662317e+003	4.662502e+002	4319.5	37	8.274070e+000	0	0	0	0	0	0	4356.41	1	1	48.8603	37.3676
DATA	112	2	27	0	0	A_44_P480882	ENSRNOT00000035496	7410.42	188.573	1.425956e+001	4.398082e+000	79.5	38.5	9.931898e+000	0	0	0	0	0	0	13.3253	1	0	57.5363	39.6942
DATA	113	2	28	0	0	A_44_P1042696	NM_001106377	7435.48	188.849	7.186560e+003	7.186681e+002	6747	38	8.721994e+000	0	0	0	0	0	0	6715.07	1	1	47.8731	38.8706
DATA	114	2	29	0	0	A_64_P132576	NM_001012357	7461	188.545	9.701457e+002	9.710383e+001	960.5	39	7.655964e+000	0	0	0	0	0	0	906.131	1	1	55.8519	38.9652
DATA	115	2	30	0	0	A_42_P652357	NM_021868	7486.42	188.573	3.006200e+004	3.006203e+003	27385	37	8.211357e+000	0	0	0	0	0	0	28061.5	1	1	57.5363	37.5429
DATA	116	2	31	0	0	A_64_P134935	NM_001107976	7511.58	188.573	1.508615e+001	4.433131e+000	83	38	7.632813e+000	0	0	0	0	0	0	14.0706	1	0	57.5363	37.2704
DATA	117	2	32	0	0	A_64_P034019	NM_001107145	7537.42	188.573	3.689960e+001	5.570500e+000	100	36	7.352909e+000	0	0	0	0	0	0	34.378	1	1	57.5363	36.5771
DATA	118	2	33	0	0	A_64_P140634	A_64_P140634	7562.13	188.771	5.856219e+003	5.856368e+002	5575.5	35	8.686299e+000	0	0	0	0	0	0	5449.24	1	1	46.5243	36.597
DATA	120	2	35	0	0	A_42_P746029	NM_144748	7613.2	189	7.286896e+001	8.406645e+000	136	36	7.522249e+000	0	0	0	0	0	0	67.5831	1	1	46.8651	36.3416
DATA	121	2	36	0	0	A_64_P009032	NM_001105801	7638.58	188.573	3.978397e+004	3.978399e+003	36657.5	38	8.121379e+000	0	0	0	0	0	0	36823.3	1	1	57.5363	38.4069
DATA	122	2	37	0	0	A_42_P764792	NM_001014036	7663.89	188.843	7.009938e+002	7.022566e+001	720	37	7.918412e+000	0	0	0	0	0	0	647.427	1	1	46.8651	37.4975
DATA	123	2	38	0	0	A_64_P029278	NM_001108687	7689.51	188.87	6.554328e+002	6.567898e+001	652.5	37	8.666282e+000	0	0	0	0	0	0	603.876	1	1	47.2035	37.0711
DATA	124	2	39	0	0	A_43_P12266	NM_022622	7714.91	188.935	6.470309e+001	7.730826e+000	128.5	36.5	9.133151e+000	0	0	0	0	0	0	59.4574	1	1	65	37.5657
DATA	125	2	40	0	0	A_44_P204710	ENSRNOT00000049315	7739.97	188.843	2.644550e+001	4.999527e+000	89	37	9.089947e+000	0	0	0	0	0	0	24.2333	1	1	46.8651	37.7438
DATA	126	2	41	0	0	A_64_P163837	NM_001013149	7765.49	189.039	2.281948e+002	2.321292e+001	275	36	8.135993e+000	0	0	0	0	0	0	208.474	1	1	49.8279	36.3085
DATA	127	2	42	0	0	A_64_P016202	XM_001080153	7791.09	188.935	4.287978e+000	4.269651e+000	61	35	8.239070e+000	0	0	0	0	0	0	-6.86755	0	0	54.4085	36.5024
DATA	128	2	43	0	0	A_64_P137168	NM_053912	7816.24	189	1.123064e+004	1.123072e+003	10047	36	8.011769e+000	0	0	0	0	0	0	10192	1	1	46.8651	36.65
DATA	129	2	44	0	0	A_42_P830598	XM_001063895	7841.73	189.219	1.811922e+003	1.812432e+002	1649	35	8.337441e+000	0	0	0	0	0	0	1638.45	1	1	48.2044	36.1632
DATA	130	2	45	0	0	A_42_P525886	NM_001105716	7867.5	189	2.620828e+002	2.656132e+001	298.5	37	9.760505e+000	0	0	0	0	0	0	236.074	1	1	54.1152	39.0151
DATA	131	2	46	0	0	A_42_P836392	NM_134383	7892.57	188.897	1.037952e+004	1.037961e+003	9225	38	9.830352e+000	0	0	0	0	0	0	9312.85	1	1	46.5243	39.3598
DATA	132	2	47	0	0	A_44_P146783	NM_001001366	7918	189	4.726267e+001	6.424152e+000	109.5	36	8.665667e+000	0	0	0	0	0	0	42.2314	1	1	54.9904	37.3682
DATA	133	2	48	0	0	A_44_P294675	NM_053687	7943.56	189.027	1.331606e+003	1.332323e+002	1255.5	37	7.545558e+000	0	0	0	0	0	0	1184.74	1	1	48.5334	36.815
DATA	134	2	49	0	0	A_64_P047137	NM_001001283	7968.61	189.069	7.401005e+000	4.450978e+000	74	36	8.210871e+000	0	0	0	0	0	0	6.55602	1	0	65	35.9602
DATA	135	2	50	0	0	A_44_P170396	NM_017267	7994.08	189.031	2.811836e+001	5.229491e+000	92	35	8.646284e+000	0	0	0	0	0	0	24.7939	1	1	46.5243	36.2039
DATA	136	2	51	0	0	A_64_P077603	ENSRNOT00000037503	8019.1	189.356	2.574490e+002	2.612318e+001	291	37	8.625291e+000	0	0	0	0	0	0	225.971	1	1	43.3362	36.9803
DATA	137	2	52	0	0	A_42_P648800	AA998304	8044.49	189.111	5.543926e+002	5.561766e+001	536.5	38	8.589956e+000	0	0	0	0	0	0	484.25	1	1	47.8731	37.7404
DATA	138	2	53	0	0	A_64_P143186	A_64_P143186	8070.5	189.352	7.394234e+001	8.642162e+000	132.5	37	8.805753e+000	0	0	0	0	0	0	64.2631	1	1	57.5363	37.2216
DATA	139	2	54	0	0	A_42_P622681	NM_001030020	8095.52	189.151	3.460702e+003	3.460994e+002	3017	37	8.722895e+000	0	0	0	1	0	0	2992.69	1	1	47.8731	37.2396
DATA	140	2	55	0	0	A_42_P506076	NM_019253	8121	188.922	2.318898e+004	2.318903e+003	19675	36	7.779381e+000	0	0	0	1	0	0	19949.2	1	1	46.1809	36.719
DATA	141	2	56	0	0	A_64_P158975	NM_001109536	8146.58	189.427	3.376726e+002	3.407147e+001	350.5	35	8.341718e+000	0	0	0	0	0	0	288.993	1	1	57.5363	36.5171
DATA	142	2	57	0	0	A_42_P655425	NM_001106406	8171.81	189.29	1.015541e+003	1.016567e+002	935.5	36	8.345824e+000	0	0	0	1	0	0	864.559	1	1	46.8651	36.6552
DATA	143	2	58	0	0	A_44_P408520	NM_031569	8197.42	189.427	2.135687e+002	2.184486e+001	251.5	36	7.971815e+000	0	0	0	0	0	0	180.842	1	1	57.5363	36.1364
DATA	144	2	59	0	0	A_64_P031259	NM_001002022	8222.59	189.347	2.525378e+002	2.567222e+001	282.5	36	7.915324e+000	0	0	0	0	0	0	212.694	1	1	49.1849	36.6942
DATA	145	2	60	0	0	A_43_P10227	NM_024397	8247.89	189.352	1.933287e+004	1.933293e+003	15821	38	8.733241e+000	0	0	0	0	0	0	16194.7	1	1	47.8731	38.4545
DATA	146	2	61	0	0	A_42_P542744	NM_001107544	8273.51	189.13	5.536436e+003	5.536633e+002	4634	37	8.814311e+000	0	0	0	1	0	0	4612.06	1	1	47.2035	37.6542
DATA	147	2	62	0	0	A_64_P052387	A_64_P052387	8299	189.455	2.683306e+002	2.724031e+001	293.5	38	8.524806e+000	0	0	0	0	0	0	222.316	1	1	55.8519	38.3265
DATA	149	2	64	0	0	A_64_P064823	ENSRNOT00000050238	8349.53	189.278	3.582664e+002	3.613938e+001	357	37	7.492625e+000	0	0	0	0	0	0	293.607	1	1	48.2044	37.7277
DATA	150	2	65	0	0	A_42_P730292	NM_001004244	8375	189.417	3.909030e+003	3.909321e+002	3209	36	8.117999e+000	0	0	0	0	0	0	3186.2	1	1	48.5334	37.24
DATA	151	2	66	0	0	A_64_P052878	FM104687	8400.29	189.429	7.529488e+002	7.544744e+001	664	37	7.517717e+000	0	0	0	0	0	0	610.434	1	1	46.8651	37.2512
DATA	152	2	67	0	0	A_64_P157171	XM_001063008	8426.03	189.597	3.021170e+003	3.021554e+002	2564	37.5	8.210091e+000	0	0	0	0	0	0	2436.21	1	1	44.0646	37.8606
DATA	153	2	68	0	0	A_44_P693350	ENSRNOT00000030985	8451.42	189.427	4.867825e+000	4.847019e+000	71	37	8.460694e+000	0	0	0	0	0	0	-0.215383	0	0	57.5363	37.7204
DATA	154	2	69	0	0	A_64_P090168	NM_001000720	8476.58	189.427	4.960580e+001	6.952912e+000	110	35	7.858658e+000	0	0	0	0	0	0	39.5867	1	1	57.5363	35.4478
DATA	155	2	70	0	0	A_42_P726392	NM_001106353	8502.11	189.5	1.845616e+003	1.846266e+002	1455	37.5	7.646302e+000	0	0	0	0	0	0	1465.38	1	1	56.9804	37.42
DATA	156	2	71	0	0	A_64_P015727	FQ218047	8527.59	189.254	5.287243e+003	5.287472e+002	4186	37	8.638707e+000	0	0	0	0	0	0	4176.98	1	1	47.5395	37.3175
DATA	157	2	72	0	0	A_44_P897023	NM_001008364	8553.1	189.472	1.414346e+003	1.415211e+002	1177.5	38	8.673507e+000	0	0	0	0	0	0	1112.01	1	1	48.2044	38.0542
DATA	158	2	73	0	0	A_44_P104776	NM_001001425	8578.42	189.573	8.197109e+001	9.585004e+000	131	39.5	7.908330e+000	0	0	0	0	0	0	64.1516	1	1	57.5363	40.355
DATA	159	2	74	0	0	A_64_P142521	A_64_P142521	8603.58	189.573	7.229227e+000	5.042092e+000	75.5	38	8.720971e+000	0	0	0	0	0	0	5.63259	1	0	57.5363	38.761
DATA	160	2	75	66	1	DarkCorner	DarkCorner	8629.11	189.5	5.033188e+000	5.011675e+000	59	36	6.379885e+000	0	0	0	0	0	0	-9.9185	0	0	56.9804	36.3057
DATA	161	2	76	66	1	DarkCorner	DarkCorner	8654.5	189.5	5.053817e+000	5.032216e+000	54	37	8.232845e+000	0	0	0	0	0	0	-14.503	0	0	57.5363	37.346
DATA	162	2	77	66	1	DarkCorner	DarkCorner	8680.25	189.431	5.073730e+000	5.052045e+000	59	36	7.798353e+000	0	0	0	0	0	0	-9.93715	0	0	45.4864	36.5024
DATA	163	2	78	66	1	DarkCorner	DarkCorner	8705.42	189.573	5.091806e+000	5.070043e+000	59	37	7.700399e+000	0	0	0	0	0	0	-8.11612	0	0	57.5363	37.1748
DATA	164	2	79	66	1	DarkCorner	DarkCorner	8730.58	189.573	5.108779e+000	5.086943e+000	58	36	8.009684e+000	0	0	0	0	0	0	-9.77866	0	0	57.5363	36.5024
DATA	165	2	80	66	1	DarkCorner	DarkCorner	8756	189.545	5.124570e+000	5.102667e+000	59	39	8.678016e+000	0	0	0	0	0	0	-10.4598	0	0	55.8519	39.4483
DATA	166	2	81	66	1	DarkCorner	DarkCorner	8781.42	189.573	5.138787e+000	5.116824e+000	61	37	8.796600e+000	0	0	0	0	0	0	-9.91785	0	0	57.5363	37.4857
DATA	167	2	82	66	1	DarkCorner	DarkCorner	8806.76	189.658	5.151272e+000	5.129256e+000	57	36	8.072086e+000	0	0	0	0	0	0	-10.762	0	0	50.4627	36.4171
DATA	168	2	83	66	1	DarkCorner	DarkCorner	8832.42	189.573	5.162356e+000	5.140292e+000	63	36	8.163737e+000	0	0	0	0	0	0	-6.69342	0	0	57.5363	36.0137
DATA	169	2	84	66	1	DarkCorner	DarkCorner	8857.58	189.573	5.171278e+000	5.149176e+000	62	36	8.449668e+000	0	0	0	0	0	0	-8.172	0	0	57.5363	36.2523
DATA	170	2	85	260	1	GE_BrightCorner	GE_BrightCorner	8883.55	189.529	4.789429e+004	4.789432e+003	36024	36	8.274934e+000	0	0	0	0	0	0	36112.4	1	1	52.6241	35.8094
DATA	171	3	1	66	1	DarkCorner	DarkCorner	6737.42	195.427	8.657395e+000	4.566813e+000	68	39	8.892895e+000	0	0	0	0	0	0	7.50651	1	0	57.5363	39.3676
DATA	172	3	2	66	1	DarkCorner	DarkCorner	6762.58	195.427	4.480445e+000	4.464257e+000	64	44	1.152354e+001	0	0	0	0	0	0	1.41693	0	0	65	45.8393
DATA	173	3	3	66	1	DarkCorner	DarkCorner	6788.11	195.5	4.457914e+000	4.438885e+000	64	42	1.114135e+001	0	0	0	0	0	0	0.128398	0	0	56.9804	44.6316
DATA	174	3	4	66	1	DarkCorner	DarkCorner	6812.72	195.405	4.436990e+000	4.418026e+000	60.5	41	9.396183e+000	0	0	0	0	0	0	-2.01367	0	0	48.5334	41.5345
DATA	175	3	5	66	1	DarkCorner	DarkCorner	6837.94	195.382	4.416180e+000	4.397305e+000	62	42.5	9.396477e+000	0	0	0	0	0	0	-0.890062	0	0	46.1809	41.6667
DATA	176	3	6	66	1	DarkCorner	DarkCorner	6863.83	195.286	4.395644e+000	4.376857e+000	61	40	8.553569e+000	0	0	0	0	0	0	-2.30551	0	0	47.2035	41.1389
DATA	177	3	7	66	1	DarkCorner	DarkCorner	6889.49	195.893	4.375556e+000	4.356855e+000	60.5	41	9.492389e+000	0	0	0	0	0	0	-2.32704	0	0	51.0895	41.7551
DATA	178	3	8	66	1	DarkCorner	DarkCorner	6915.44	195.869	4.356553e+000	4.337933e+000	60	41	8.378544e+000	0	0	0	0	0	0	-3.19649	0	0	51.0895	41.0667
DATA	179	3	9	66	1	DarkCorner	DarkCorner	6940.5	195.5	4.339254e+000	4.320708e+000	64	39	7.966127e+000	0	0	0	0	0	0	-0.961795	0	0	57.5363	39.9412
DATA	180	3	10	66	1	DarkCorner	DarkCorner	6965.67	195.5	4.322438e+000	4.303963e+000	59	44	8.868740e+000	0	0	0	0	0	0	-3.58867	0	0	65	43.8909
DATA	181	3	11	0	0	A_64_P269465	ENSRNOT00000055742	6991.21	195.656	2.089091e+001	4.769576e+000	82	44	9.908893e+000	0	0	0	0	0	0	18.9429	1	0	43.7019	41.8167
DATA	182	3	12	0	0	A_64_P140776	NM_001114502	7016.34	195.878	6.078725e+003	6.078875e+002	5450	42	1.092037e+001	0	0	0	0	0	0	5531.47	1	1	48.8603	43.1333
DATA	183	3	13	0	0	A_42_P662683	NM_001108855	7041.63	195.37	2.040229e+004	2.040233e+003	18457.5	42	8.015569e+000	0	0	0	0	0	0	18626.2	1	1	48.2044	42.9286
DATA	184	3	14	0	0	A_44_P308687	NM_181389	7067.25	195.827	2.507244e+002	2.542923e+001	292.5	40	7.107880e+000	0	0	0	0	0	0	229.641	1	1	48.8603	39.6829
DATA	185	3	15	0	0	A_42_P705255	NM_078622	7092.47	195.671	1.334408e+002	1.399926e+001	180	40	1.043741e+001	0	0	0	0	0	0	122.575	1	1	48.5334	41.9211
DATA	186	3	16	0	0	A_44_P142472	NM_001106072	7117.75	195.5	8.626379e+003	8.626482e+002	8036	38.5	8.678030e+000	0	0	0	0	0	0	7945.37	1	1	48.5334	39.7391
DATA	187	3	17	0	0	A_64_P015946	NM_001009720	7143.31	195.662	1.165023e+003	1.165784e+002	1136	36	6.049212e+000	0	0	0	0	0	0	1075.8	1	1	48.5334	36.8085
DATA	188	3	18	0	0	A_64_P118698	ENSRNOT00000050943	7169	195.545	7.905161e+001	8.951930e+000	139	40	8.963892e+000	0	0	0	0	0	0	73.1662	1	1	55.8519	40.3115
DATA	189	3	19	0	0	A_42_P705302	NM_001107361	7194.14	195.873	1.083376e+004	1.083385e+003	9970	36	9.051140e+000	0	0	0	0	0	0	10048.3	1	1	46.8651	37.7255
DATA	190	3	20	0	0	A_64_P097547	NM_001100528	7219.58	195.573	4.845886e+001	6.402374e+000	114	38	8.211023e+000	0	0	0	0	0	0	45.0271	1	1	65	39.3396
DATA	191	3	21	0	0	A_42_P815485	NM_001013908	7244.99	195.616	1.037831e+004	1.037839e+003	9575	36	6.188102e+000	0	0	0	0	0	0	9659.09	1	1	48.8603	37.5385
DATA	192	3	22	0	0	A_42_P526728	ENSRNOT00000060758	7270.25	195.658	2.113644e+003	2.114055e+002	1979.5	42	8.082397e+000	0	0	0	0	0	0	1969.91	1	1	48.2044	41.3833
DATA	193	3	23	0	0	A_42_P692317	NM_001107565	7295.78	195.892	9.506030e+002	9.515157e+001	923.5	40	1.065348e+001	0	0	0	0	0	0	887.022	1	1	45.835	41.4082
DATA	194	3	24	0	0	A_44_P383949	NM_175593	7320.8	195.788	2.036518e+001	4.634283e+000	86	39.5	7.784297e+000	0	0	0	0	0	0	19.0202	1	0	46.1809	38.9655
DATA	195	3	25	0	0	A_42_P589570	NM_001014105	7346.44	195.973	4.054400e+002	4.075684e+001	440	40	8.523382e+000	0	0	0	0	0	0	378.939	1	1	48.5334	38.9245
DATA	196	3	26	0	0	A_64_P012384	NM_001039338	7372.09	195.935	1.478220e+002	1.535583e+001	204.5	39	8.638524e+000	0	0	0	0	0	0	138.223	1	1	54.4085	39.6226
DATA	197	3	27	0	0	A_64_P088612	NM_053871	7397.24	196.014	5.439017e+003	5.439176e+002	5073	41	1.063198e+001	0	0	0	0	0	0	5086.99	1	1	46.8651	41.3273
DATA	198	3	28	0	0	A_42_P668072	NM_013130	7422.68	195.919	5.417342e+002	5.433269e+001	550	42	8.695007e+000	0	0	0	0	0	0	506.659	1	1	48.8603	43.4894
DATA	199	3	29	0	0	A_44_P624451	NM_001134605	7448.12	195.913	1.024430e+002	1.105602e+001	163	40	8.540988e+000	0	0	0	0	0	0	95.7861	1	1	46.8651	39.8868
DATA	200	3	30	0	0	A_64_P118502	A_64_P118502	7473.43	195.9	5.087502e+002	5.104483e+001	531.5	42	9.006820e+000	0	0	0	0	0	0	475.46	1	1	47.5395	42.1404
DATA	201	3	31	0	0	A_43_P15761	NM_031608	7499	196	2.509399e+002	2.543698e+001	304	39	9.097239e+000	0	0	0	0	0	0	234.352	1	1	54.9904	40.878
DATA	202	3	32	0	0	A_42_P667696	NM_001191800	7524.42	195.893	2.215662e+003	2.216054e+002	2116	38	9.132593e+000	0	0	0	0	0	0	2067.2	1	1	49.8279	40
DATA	203	3	33	0	0	A_44_P899121	NM_001079941	7549.44	195.972	4.859511e+003	4.859690e+002	4468	39	9.269124e+000	0	0	0	0	0	0	4528.64	1	1	48.2044	39.8571
DATA	204	3	34	0	0	A_42_P642757	NM_031235	7574.76	196	5.786806e+003	5.786957e+002	5397	35	7.891676e+000	0	0	0	0	0	0	5385.23	1	1	46.8651	36.4127
DATA	205	3	35	0	0	A_64_P066694	NM_001033898	7599.85	196.277	1.176980e+002	1.249151e+001	176	37.5	8.281326e+000	0	0	0	0	0	0	109.357	1	1	45.835	38.7963
DATA	206	3	36	0	0	A_42_P699201	TC594545	7626.09	196.065	3.003715e+001	5.157564e+000	93	39	9.247967e+000	0	0	0	0	0	0	27.8541	1	1	54.4085	40.3462
DATA	207	3	37	0	0	A_42_P591944	NM_172093	7651.3	196.1	1.569355e+002	1.624619e+001	212	41	7.386293e+000	0	0	0	0	0	0	145.229	1	1	47.2035	38.9811
DATA	208	3	38	0	0	A_44_P115293	NM_001108294	7676.58	196.427	3.644482e+002	3.668726e+001	404.5	40	8.310521e+000	0	0	0	0	0	0	336.503	1	1	57.5363	41.0213
DATA	209	3	39	1028	1	(+)E1A_r60_a107	E1A_r60_a107	7702.42	196.427	1.805787e+001	4.591586e+000	82	39.5	7.930516e+000	0	0	0	0	0	0	16.6306	1	0	57.5363	40.2222
DATA	210	3	40	0	0	A_44_P194531	NM_001007742	7727.35	196.265	5.366572e+002	5.383240e+001	562	38	9.191399e+000	0	0	0	0	0	0	492.909	1	1	46.1809	39.2
DATA	211	3	41	0	0	A_43_P20016	NM_001107377	7752.72	196.216	2.640495e+002	2.674406e+001	303	40	8.264134e+000	0	0	0	0	0	0	241.815	1	1	48.8603	39.5
DATA	212	3	42	0	0	A_64_P105550	A_64_P105550	7777.89	196.17	2.139245e+002	2.181221e+001	259.5	37.5	9.194033e+000	0	0	0	0	0	0	195.304	1	1	40.6843	38.569
DATA	213	3	43	0	0	A_42_P791872	NM_001135174	7803.44	196.267	1.194310e+004	1.194318e+003	10797.5	39	9.645724e+000	0	0	0	0	0	0	10867.3	1	1	49.1849	39
DATA	214	3	44	0	0	A_42_P499273	NM_001012148	7828.88	196.527	2.765603e+003	2.765935e+002	2479	40.5	9.276787e+000	0	0	0	0	0	0	2507.74	1	1	48.8603	42.32
DATA	215	3	45	0	0	A_64_P021960	NM_001109493	7854.42	195.776	3.325339e+002	3.353077e+001	366.5	37	8.006706e+000	0	0	0	0	0	0	300.384	1	1	46.5243	39.1667
DATA	216	3	46	0	0	A_64_P083725	A_64_P083725	7880	196.305	1.062416e+005	1.062416e+004	95756.5	44	1.188131e+001	0	0	0	0	0	0	95603.6	1	1	51.0895	45.5532
DATA	217	3	47	0	0	A_42_P524536	NM_012698	7905.45	196.395	4.267317e+002	4.289310e+001	442	38.5	9.977333e+000	0	0	0	0	0	0	382.459	1	1	49.8279	39.6667
DATA	218	3	48	0	0	A_64_P151675	NM_175755	7930.83	196	5.215026e+002	5.233190e+001	539.5	37	6.526193e+000	0	0	0	0	0	0	465.418	1	1	45.4864	38.2222
DATA	219	3	49	0	0	A_64_P146914	A_64_P146914	7956.31	196.338	4.463762e+003	4.463976e+002	3985	43	1.006057e+001	0	0	0	0	0	0	3966.56	1	1	48.5334	42.75
DATA	220	3	50	0	0	A_64_P115065	NM_001109631	7981.5	196.5	8.496953e+000	4.476083e+000	74	38	9.983913e+000	0	0	0	0	0	0	7.51712	1	0	57.5363	40.7736
DATA	221	3	51	0	0	A_42_P468771	NM_001107362	8006.81	196.519	5.918567e+003	5.918732e+002	5265	37	1.077644e+001	0	0	0	1	0	0	5212	1	1	49.8279	39.2941
DATA	222	3	52	0	0	A_44_P226461	NM_053798	8031.93	196.493	2.858634e+003	2.858978e+002	2494	38	9.493468e+000	0	0	0	0	0	0	2505.55	1	1	48.5334	39.2
DATA	223	3	53	0	0	A_64_P009440	NM_001109313	8057.4	196.2	3.224263e+001	5.501536e+000	97	40	8.829242e+000	0	0	0	0	0	0	28.1214	1	1	47.2035	39.1607
DATA	224	3	54	0	0	A_44_P282433	NM_033230	8083.11	196.5	7.980420e+002	7.992985e+001	761	38	6.148992e+000	0	0	0	1	0	0	692.568	1	1	56.9804	38.0889
DATA	225	3	55	0	0	A_42_P461003	NM_001044283	8108.37	196.5	1.761021e+004	1.761027e+003	15128	35	1.072459e+001	0	0	0	0	0	0	15205.8	1	1	47.8731	39.4643
DATA	226	3	56	0	1	ETG10_236652	ETG10_236652	8133.89	196.5	1.842532e+001	4.886792e+000	84	40	9.014020e+000	0	0	0	0	0	0	15.8272	1	0	65	40.7843
DATA	227	3	57	0	0	A_42_P529780	NM_138855	8159.33	196.5	8.600457e+002	8.612484e+001	788	36.5	8.623165e+000	0	0	0	0	0	0	734.905	1	1	57.5363	38.3846
DATA	228	3	58	0	0	A_42_P492976	NM_001126099	8184.44	196.643	7.829264e+002	7.842613e+001	705	37	9.365205e+000	0	0	0	0	0	0	665.521	1	1	47.5395	38.4444
DATA	229	3	59	0	0	A_42_P533865	NM_001127650	8210.11	196.5	3.050472e+001	5.518496e+000	96	39.5	9.327795e+000	0	0	0	0	0	0	25.7896	1	1	56.9804	39.82
DATA	230	3	60	0	0	A_64_P026399	NM_001007626	8235.41	196.56	1.199474e+003	1.200365e+002	1055	40	6.245530e+000	0	0	0	0	0	0	1008.63	1	1	49.5074	41.1875
DATA	231	3	61	0	0	A_64_P152543	XM_221353	8260.83	196.386	1.652996e+004	1.653002e+003	14062	40	9.462241e+000	0	0	0	0	0	0	13824.2	1	1	47.2035	41.6122
DATA	232	3	62	0	0	A_44_P203195	NM_053585	8286	196.5	2.646173e+003	2.646586e+002	2205	44	8.881142e+000	0	0	0	0	0	0	2201.14	1	1	48.5334	42.9825
DATA	233	3	63	0	0	A_42_P490612	NM_001108262	8311.25	196.627	1.169133e+004	1.169142e+003	9533	42	9.299370e+000	0	0	0	0	0	0	9672.65	1	1	46.1809	42.2292
DATA	234	3	64	0	0	A_44_P457548	NM_001103351	8336.76	197.014	1.960612e+002	2.016740e+001	228.5	43	9.223567e+000	0	0	0	0	0	0	161.334	1	1	47.2035	42.2093
DATA	235	3	65	0	0	A_42_P755665	NM_001013154	8362.45	196.622	1.939611e+003	1.940193e+002	1633	38	9.077459e+000	0	0	0	0	0	0	1587.21	1	1	49.1849	39.9375
DATA	236	3	66	0	0	A_42_P781999	NM_001106378	8387.54	196.878	2.752877e+004	2.752881e+003	22254	36	8.077901e+000	0	0	0	0	0	0	22408.5	1	1	48.8603	37.4419
DATA	237	3	67	0	0	A_44_P100289	ENSRNOT00000049514	8413.42	196.573	8.777033e+001	1.000507e+001	137.5	40	7.795810e+000	0	0	0	0	0	0	71.0538	1	1	57.5363	39.8793
DATA	238	3	68	0	0	A_42_P629599	ENSRNOT00000023101	8438.38	196.958	6.284228e+002	6.302741e+001	560.5	37	7.961904e+000	0	0	0	1	0	0	506.141	1	1	48.2044	38.7111
DATA	239	3	69	0	0	A_44_P192083	NM_001047088	8464.21	196.463	5.841391e+001	7.594462e+000	114	38	9.563893e+000	0	0	0	0	0	0	46.7951	1	1	46.5243	38.4737
DATA	240	3	70	0	0	A_42_P498066	NM_031136	8489.42	196.573	9.933802e+004	9.933803e+003	77471.5	41.5	1.271118e+001	0	0	0	0	0	0	79179.2	1	1	57.5363	43.463
DATA	241	3	71	0	0	A_42_P519910	NM_001106292	8514.63	196.63	2.711224e+004	2.711228e+003	21492	42	8.580598e+000	0	0	0	0	0	0	21503.9	1	1	48.2044	41.3333
DATA	242	3	72	0	0	A_42_P657538	NM_001008362	8540.12	196.616	3.774974e+003	3.775295e+002	3054	38	9.170478e+000	0	0	0	1	0	0	2979.52	1	1	48.5334	40.0192
DATA	243	3	73	0	0	A_64_P030630	NM_001109610	8565.63	197	4.795456e+003	4.795712e+002	3814	40	8.566913e+000	0	0	0	0	0	0	3767.39	1	1	48.5334	41.0612
DATA	244	3	74	0	0	A_44_P126366	NM_001017456	8591	196.947	8.527282e+001	9.870661e+000	137	42	9.334808e+000	0	0	0	0	0	0	66.6874	1	1	46.8651	41.8043
DATA	245	3	75	0	0	A_43_P15627	ENSRNOT00000067029	8616.5	196.648	4.073180e+001	6.444150e+000	102	37.5	9.933734e+000	0	0	0	0	0	0	31.7128	1	1	57.5363	38.9583
DATA	246	3	76	0	0	A_42_P754784	CB328432	8641.63	197	7.812577e+003	7.812738e+002	5864	39	6.841935e+000	0	0	0	0	0	0	6058.08	1	1	48.5334	39.0204
DATA	247	3	77	66	1	DarkCorner	DarkCorner	8667.39	196.931	5.055740e+000	5.034132e+000	56	39	7.881884e+000	0	0	0	0	0	0	-13.0811	0	0	65	39.6226
DATA	248	3	78	66	1	DarkCorner	DarkCorner	8692.96	197.155	5.074446e+000	5.052757e+000	57.5	37.5	9.147493e+000	0	0	0	0	0	0	-11.097	0	0	46.8651	39.1786
DATA	249	3	79	66	1	DarkCorner	DarkCorner	8718.48	197.354	5.091900e+000	5.070137e+000	55	41	8.636176e+000	0	0	0	0	0	0	-12.9494	0	0	50.4627	41.7647
DATA	250	3	80	66	1	DarkCorner	DarkCorner	8743.5	197	5.108336e+000	5.086503e+000	56	40.5	9.126231e+000	0	0	0	0	0	0	-11.324	0	0	65	41.9231
DATA	251	3	81	66	1	DarkCorner	DarkCorner	8768.47	197	5.122935e+000	5.101039e+000	59	46	1.295346e+001	0	0	0	0	0	0	-10.6287	0	0	45.1352	47.0185
DATA	252	3	82	66	1	DarkCorner	DarkCorner	8794.09	196.935	5.136425e+000	5.114471e+000	63	40	9.375479e+000	0	0	0	0	0	0	-7.90813	0	0	65	41.6863
DATA	253	3	83	66	1	DarkCorner	DarkCorner	8819.2	197.485	5.147235e+000	5.125235e+000	58	38	8.300280e+000	0	0	0	0	0	0	-11.5737	0	0	45.835	37.9706
DATA	254	3	84	66	1	DarkCorner	DarkCorner	8844.6	197.283	5.157307e+000	5.135265e+000	58	38	7.411745e+000	0	0	0	0	0	0	-10.4623	0	0	41.4593	38.1186
DATA	255	3	85	66	1	DarkCorner	DarkCorner	8870.5	197	5.165705e+000	5.143627e+000	60	36	7.569346e+000	0	0	0	0	0	0	-7.86467	0	0	54.1152	36.9722
DATA	256	4	1	66	1	DarkCorner	DarkCorner	6749.91	202.614	6.381865e+000	4.511670e+000	66	44	9.080002e+000	0	0	0	0	0	0	5.55541	1	0	57.259	43.9107
DATA	257	4	2	66	1	DarkCorner	DarkCorner	6775.12	203.286	4.462595e+000	4.443521e+000	61	44	1.034229e+001	0	0	0	0	0	0	-2.10469	0	0	48.8603	45.0345
DATA	258	4	3	66	1	DarkCorner	DarkCorner	6800.52	203.565	4.440560e+000	4.421581e+000	59.5	43	1.035047e+001	0	0	0	0	0	0	-1.14889	0	0	39.4933	44.0811
DATA	259	4	4	66	1	DarkCorner	DarkCorner	6825.87	203.127	4.419853e+000	4.400962e+000	58	43	7.820912e+000	0	0	0	0	0	0	-3.20874	0	0	46.8651	42.4
DATA	260	4	5	66	1	DarkCorner	DarkCorner	6851.5	203	4.399385e+000	4.381021e+000	61	43	7.795647e+000	0	0	0	0	0	0	0.550631	0	0	54.1152	42.2449
DATA	261	4	6	66	1	DarkCorner	DarkCorner	6876.4	203.448	4.379794e+000	4.361075e+000	59.5	41	9.946228e+000	0	0	0	0	0	0	-4.29381	0	0	51.0895	42.7895
DATA	262	4	7	66	1	DarkCorner	DarkCorner	6902.56	202.855	4.360808e+000	4.342169e+000	55	42.5	9.730180e+000	0	0	0	0	0	0	-6.93243	0	0	47.2035	42.0313
DATA	263	4	8	66	1	DarkCorner	DarkCorner	6927.76	202.743	4.342978e+000	4.324416e+000	59.5	39.5	5.960502e+000	0	0	0	0	0	0	-3.46579	0	0	46.8651	40.3
DATA	264	4	9	66	1	DarkCorner	DarkCorner	6954.19	203.08	4.324825e+000	4.306340e+000	56	42.5	8.355316e+000	0	0	0	0	0	0	-6.44683	0	0	47.8731	43.1591
DATA	265	4	10	0	0	A_44_P807031	NM_001108921	6978.38	203.042	6.787696e+003	6.787831e+002	6197	47	9.907028e+000	0	0	0	0	0	0	6150.32	1	1	48.2044	44.7222
DATA	266	4	11	0	0	A_64_P025813	NM_001009379	7004	203	4.293599e+000	4.278729e+000	63	48	1.187299e+001	0	0	0	0	0	0	1.56928	0	0	65	47.303
DATA	267	4	12	0	0	A_64_P130551	XM_001081846	7028.97	202.986	1.402877e+001	4.485899e+000	74	44	7.560770e+000	0	0	0	0	0	0	12.8008	1	0	46.8651	44.6296
DATA	268	4	13	0	0	A_42_P715449	NM_001033709	7054.44	202.9	2.143648e+003	2.144068e+002	1956	44.5	9.040762e+000	0	0	0	1	0	0	1962.32	1	1	47.8731	43.1538
DATA	269	4	14	0	0	A_42_P727584	NM_031622	7079.59	202.958	7.133295e+003	7.133420e+002	6487	44	8.219696e+000	0	0	0	0	0	0	6549.55	1	1	48.2044	44.2083
DATA	270	4	15	0	0	A_42_P600642	NM_001008386	7105.17	203	6.298179e+002	6.312317e+001	632	40	1.109720e+001	0	0	0	0	0	0	579.925	1	1	46.8651	42.1724
DATA	271	4	16	0	0	A_42_P669103	NM_001108329	7130.56	203.028	1.327028e+003	1.327696e+002	1286	37	7.064621e+000	0	0	0	0	0	0	1225.1	1	1	48.2044	38.8621
DATA	272	4	17	0	0	A_44_P715330	NM_001024966	7155.64	202.871	9.582119e+002	9.591326e+001	908	39	8.127760e+000	0	0	0	0	0	0	886.686	1	1	46.8651	39.5625
DATA	273	4	18	0	0	A_64_P083185	NM_001107199	7181.44	203.07	7.002893e+002	7.015430e+001	697.5	38	9.621661e+000	0	0	0	0	0	0	649.466	1	1	48.2044	39.8276
DATA	274	4	19	0	0	A_64_P037313	ENSRNOT00000030164	7207.09	203.386	1.994543e+001	4.634861e+000	83	41	1.208595e+001	0	0	0	0	0	0	18.5351	1	0	65	42.8485
DATA	275	4	20	0	0	A_44_P321009	NM_012540	7232.46	202.937	4.194717e+000	4.190390e+000	68	41	9.498509e+000	0	0	0	0	0	0	3.14014	0	0	44.0646	43.3103
DATA	276	4	21	0	0	A_42_P700753	FQ212883	7257.63	202.735	2.469058e+003	2.469410e+002	2369	41	6.650836e+000	0	0	0	0	0	0	2301.65	1	1	46.5243	40.1852
DATA	277	4	22	0	0	A_44_P775974	NM_001024363	7283.42	203.427	4.182868e+000	4.172242e+000	68.5	44	7.547631e+000	0	0	0	0	0	0	2.29528	0	0	57.5363	43.5313
DATA	278	4	23	0	0	A_44_P503868	A_44_P503868	7308.35	202.984	6.273981e+003	6.274119e+002	5884	40.5	7.963764e+000	0	0	0	0	0	0	5862.24	1	1	44.0646	40.6923
DATA	279	4	24	0	0	A_64_P122541	A_64_P122541	7334	203.455	1.615043e+002	1.667694e+001	217	38	7.005982e+000	0	0	0	0	0	0	151.036	1	1	55.8519	36.3529
DATA	280	4	25	0	0	A_64_P080967	NM_001033890	7359.07	203.268	1.154928e+004	1.154936e+003	10577	42.5	9.789040e+000	0	0	0	0	0	0	10806.5	1	1	47.5395	41.5882
DATA	281	4	26	0	0	A_44_P1056309	NM_001105912	7384.63	203.352	3.121357e+001	5.195783e+000	96	47	1.140043e+001	0	0	0	0	0	0	29.2162	1	1	48.2044	45.6452
DATA	282	4	27	0	0	A_44_P199514	NM_001005564	7410.42	203.427	1.999209e+003	1.999641e+002	1918	48	8.946750e+000	0	0	0	0	0	0	1871.48	1	1	57.5363	45.5172
DATA	283	4	28	0	0	A_64_P097952	NM_001134962	7435.58	203.427	4.332298e+001	6.001934e+000	108	42.5	9.896555e+000	0	0	0	0	0	0	40.5494	1	1	65	43.6429
DATA	284	4	29	0	0	A_42_P813939	NM_001108741	7460.71	202.833	3.692083e+003	3.692317e+002	3558	40	8.132628e+000	0	0	0	0	0	0	3454.21	1	1	45.835	39.8378
DATA	285	4	30	0	0	A_64_P006423	NM_012584	7486.82	202.892	1.543410e+001	4.435425e+000	80	38	1.019834e+001	0	0	0	0	0	0	14.4308	1	0	45.835	41.3846
DATA	286	4	31	0	0	A_42_P670614	NM_001107097	7511.3	202.746	8.143962e+003	8.144068e+002	7307.5	44	8.865100e+000	0	0	0	0	0	0	7608.25	1	1	45.835	44.56
DATA	287	4	32	0	0	A_64_P084088	NM_001011954	7536.7	203.1	5.729627e+002	5.744752e+001	592	40	1.280269e+001	0	0	0	0	0	0	534.724	1	1	47.2035	43.8621
DATA	288	4	33	0	0	A_64_P025643	XM_001073566	7562.41	203.72	4.141850e+002	4.162800e+001	461	38	9.239244e+000	0	0	0	0	0	0	386.063	1	1	48.8603	40.3636
DATA	289	4	34	0	0	A_42_P719607	NM_153721	7587.89	203.5	2.238983e+001	4.739792e+000	87	41	9.078675e+000	0	0	0	0	0	0	20.8371	1	1	56.9804	40.1212
DATA	290	4	35	0	0	A_42_P843603	NM_052800	7613.04	203.574	3.858514e+002	3.881142e+001	426	39	7.466719e+000	0	0	0	0	0	0	358.474	1	1	46.5243	38.7576
DATA	291	4	36	0	0	A_44_P234129	NM_001135802	7638.12	203.418	1.741562e+002	1.791328e+001	226	41	6.028499e+000	0	0	0	0	0	0	161.482	1	1	46.1809	40.0303
DATA	292	4	37	0	0	A_42_P701161	NM_001033666	7663.94	202.969	1.462699e+004	1.462705e+003	13357	42	8.600454e+000	0	0	0	0	0	0	13531.7	1	1	46.8651	39.9697
DATA	293	4	38	0	0	A_44_P1017335	NM_001108607	7689.25	203.373	1.158049e+004	1.158057e+003	10531	42	4.701773e+000	0	0	0	0	0	0	10688.2	1	1	46.1809	41.76
DATA	294	4	39	0	0	A_44_P900209	CV121387	7714.9	203.057	1.174054e+002	1.247721e+001	173	37	8.366325e+000	0	0	0	0	0	0	108.069	1	1	46.8651	38.2667
DATA	295	4	40	0	0	A_64_P037517	ENSRNOT00000014921	7740.23	203.016	7.662253e+001	8.755083e+000	135	37.5	9.519928e+000	0	0	0	0	0	0	70.3308	1	1	45.4864	39.125
DATA	296	4	41	0	0	A_64_P128528	NM_001106013	7765.54	203.662	2.503840e+003	2.504200e+002	2409	41.5	9.587813e+000	0	0	0	0	0	0	2291.51	1	1	46.5243	42.6154
DATA	297	4	42	0	0	A_64_P378865	NM_001000706	7791.11	203.5	1.036511e+002	1.120716e+001	163	39	1.017578e+001	0	0	0	0	0	0	94.5528	1	1	56.9804	40.1892
DATA	298	4	43	0	0	A_42_P553960	NM_001107831	7816.31	203.662	9.199571e+003	9.199671e+002	8198.5	41	1.396531e+001	0	0	0	0	0	0	8363.91	1	1	48.5334	46.2667
DATA	299	4	44	0	0	A_42_P717654	XM_001063683	7841.37	203.64	5.923743e+003	5.923899e+002	5195.5	42.5	6.971701e+000	0	0	0	0	0	0	5366.6	1	1	48.8603	42.2692
DATA	300	4	45	0	0	A_44_P295118	NM_001107228	7867.42	203.573	3.876763e+002	3.900628e+001	417	42	8.507580e+000	0	0	0	0	0	0	349.858	1	1	57.5363	42.0741
DATA	301	4	46	0	0	A_64_P049057	ENSRNOT00000014519	7892.58	203.573	1.174502e+003	1.175298e+002	1118	43	8.923751e+000	0	0	0	0	0	0	1055.8	1	1	57.5363	43.3333
DATA	302	4	47	0	0	A_42_P810287	NM_001004107	7917.93	203.353	2.145034e+003	2.145473e+002	1950	39	1.045046e+001	0	0	0	0	0	0	1920.32	1	1	46.1809	41
DATA	303	4	48	0	0	A_42_P702729	NM_001107557	7943.5	203.265	2.677740e+003	2.678096e+002	2483.5	42	1.372744e+001	0	0	0	0	0	0	2386.93	1	1	46.5243	45.5217
DATA	304	4	49	0	0	A_42_P811084	NM_173147	7968.5	203.5	3.077551e+003	3.077863e+002	2789.5	43	1.040240e+001	0	0	0	0	0	0	2731.55	1	1	49.1849	44.28
DATA	305	4	50	0	0	A_64_P151473	A_64_P151473	7994.09	203.896	2.639252e+004	2.639256e+003	23626	43	1.003900e+001	0	0	0	0	0	0	23319.5	1	1	46.8651	42.6667
DATA	306	4	51	0	0	A_44_P134634	ENSRNOT00000000260	8019.58	203.573	1.515143e+002	1.578329e+001	204	42	9.824820e+000	0	0	0	0	0	0	133.24	1	1	57.5363	41.2069
DATA	307	4	52	0	0	A_44_P178479	NM_001135039	8044.8	203.733	1.062897e+003	1.063825e+002	957	43	8.303441e+000	0	0	0	0	0	0	930.284	1	1	49.1849	42.1333
DATA	308	4	53	0	0	A_64_P317400	ENSRNOT00000068382	8070.5	203.648	4.483477e+000	4.486094e+000	72	41	6.721781e+000	0	0	0	0	0	0	3.84515	0	0	65	40.5185
DATA	309	4	54	0	0	A_42_P781735	NM_053319	8095.58	203.573	1.088999e+005	1.088999e+004	92284.5	41	1.376678e+001	0	0	0	0	0	0	94370.4	1	1	57.5363	47.2963
DATA	310	4	55	0	0	A_64_P144869	NM_017131	8121	203.809	7.526482e+002	7.539979e+001	709	40	1.168017e+001	0	0	0	0	0	0	648.929	1	1	46.8651	42.3438
DATA	311	4	56	0	0	A_44_P445484	ENSRNOT00000049980	8146.5	203.813	1.374148e+003	1.374895e+002	1250.5	41	7.404898e+000	0	0	0	0	0	0	1178.63	1	1	49.8279	40.7586
DATA	312	4	57	0	0	A_42_P487832	NM_001108389	8171.7	203.9	2.485404e+003	2.485822e+002	2049	45	9.273884e+000	0	0	0	0	0	0	2120.72	1	1	47.2035	43.8276
DATA	313	4	58	0	0	A_42_P482829	NM_001108138	8197.3	203.791	1.013501e+003	1.014536e+002	940	43	1.082636e+001	0	0	0	0	0	0	860.152	1	1	45.835	43.28
DATA	314	4	59	0	0	A_64_P101440	XM_001065775	8222.58	204.092	4.625133e+000	4.607856e+000	71	41.5	6.951175e+000	0	0	0	0	0	0	1.27895	0	0	45.1352	43.6667
DATA	315	4	60	0	0	A_64_P072268	NM_001002277	8248.22	204	1.213947e+003	1.214830e+002	1083	42	7.810250e+000	0	0	0	0	0	0	1019.25	1	1	46.1809	44.4
DATA	316	4	61	0	0	A_42_P589190	NM_023104	8273.09	203.896	1.137235e+003	1.138187e+002	970.5	41.5	8.115099e+000	0	0	0	0	0	0	949.763	1	1	46.8651	42.625
DATA	317	4	62	0	0	A_64_P027328	A_64_P027328	8299	204	3.984802e+002	4.012204e+001	413	43	8.494882e+000	0	0	0	0	0	0	330.957	1	1	54.9904	43.1143
DATA	318	4	63	0	0	A_42_P788541	NM_001106794	8324.33	203.988	7.345557e+003	7.345708e+002	6127	43.5	9.881218e+000	0	0	0	0	0	0	6067.86	1	1	49.1849	43.0385
DATA	319	4	64	0	0	A_42_P457003	NM_012802	8349.3	203.9	1.235573e+004	1.235582e+003	9815.5	45	1.007174e+001	0	0	0	0	0	0	10152.2	1	1	47.2035	44.76
DATA	320	4	65	0	0	A_64_P095695	A_64_P095695	8375.39	204.069	1.033444e+002	1.137711e+001	152	42	1.089460e+001	0	0	0	0	0	0	84.4474	1	1	65	43.3333
DATA	321	4	66	0	0	A_42_P463880	NM_001013927	8400.5	204	1.081766e+002	1.182796e+001	157	43	7.150006e+000	0	0	0	0	0	0	87.9291	1	1	65	41.5484
DATA	322	4	67	0	0	A_43_P20354	NM_001134574	8425.87	204.014	1.364580e+002	1.446822e+001	179	41	8.958206e+000	0	0	0	0	0	0	110.333	1	1	46.8651	40.871
DATA	323	4	68	0	0	A_64_P055958	ENSRNOT00000056114	8451	204	5.874704e+001	7.607475e+000	118.5	38	8.867983e+000	0	0	0	0	0	0	47.2555	1	1	46.8651	39.4375
DATA	324	4	69	0	0	A_64_P159044	ENSRNOT00000040690	8476.65	204	2.030030e+003	2.030611e+002	1721	42.5	1.159097e+001	0	0	0	0	0	0	1624.5	1	1	44.0646	44.8333
DATA	325	4	70	0	0	A_44_P473234	ENSRNOT00000024858	8502.09	204.386	6.174181e+002	6.193457e+001	562	45.5	9.613799e+000	0	0	0	0	0	0	491.64	1	1	57.259	48.3824
DATA	326	4	71	0	0	A_42_P797965	NM_001108497	8527.26	203.812	1.114341e+003	1.115421e+002	951.5	42	7.783640e+000	0	0	0	0	0	0	882.933	1	1	46.5243	42.6333
DATA	327	4	72	0	0	A_42_P592157	NM_001002828	8552.75	204.265	4.864361e+002	4.889279e+001	446	45	9.400552e+000	0	0	0	1	0	0	383.618	1	1	46.8651	45.2963
DATA	328	4	73	0	0	A_64_P016419	NM_001000622	8578.42	204.427	3.721525e+001	6.195159e+000	100	41.5	8.295166e+000	0	0	0	0	0	0	29.2137	1	1	57.5363	42.875
DATA	329	4	74	0	0	A_44_P306863	XM_344447	8603.63	204.282	1.556926e+003	1.557721e+002	1284	43	1.053697e+001	0	0	0	0	0	0	1216.77	1	1	47.8731	42.8696
DATA	330	4	75	0	0	A_42_P471835	TC610276	8628.93	204.268	5.231107e+003	5.231345e+002	3998	39	7.353701e+000	0	0	0	0	0	0	4070.95	1	1	47.5395	38.6667
DATA	331	4	76	0	1	ETG02_36680	ETG02_36680	8654.5	204.352	5.037716e+000	5.028878e+000	72	41	7.825191e+000	0	0	0	0	0	0	2.76767	0	0	57.5363	40.1852
DATA	332	4	77	66	1	DarkCorner	DarkCorner	8679.58	204.427	5.056651e+000	5.035039e+000	57	41	8.181425e+000	0	0	0	0	0	0	-12.6632	0	0	65	39.25
DATA	333	4	78	66	1	DarkCorner	DarkCorner	8705.77	204.744	5.074937e+000	5.053246e+000	63	41.5	9.192930e+000	0	0	0	0	0	0	-8.918	0	0	51.4001	42.2368
DATA	334	4	79	66	1	DarkCorner	DarkCorner	8730.81	204.36	5.091930e+000	5.070167e+000	58	45	8.640490e+000	0	0	0	0	0	0	-10.5018	0	0	49.5074	44.4839
DATA	335	4	80	66	1	DarkCorner	DarkCorner	8756.39	204.836	5.106893e+000	5.085066e+000	60	43	1.020323e+001	0	0	0	0	0	0	-10.6165	0	0	46.1809	41.2
DATA	336	4	81	66	1	DarkCorner	DarkCorner	8782.01	204.303	5.121535e+000	5.099646e+000	61	42	9.135407e+000	0	0	0	0	0	0	-9.01894	0	0	45.4864	42.2069
DATA	337	4	82	66	1	DarkCorner	DarkCorner	8806.58	204.427	5.133278e+000	5.111338e+000	61	40	9.069703e+000	0	0	0	0	0	0	-8.96738	0	0	57.5363	40.2045
DATA	338	4	83	66	1	DarkCorner	DarkCorner	8832.82	204.795	5.143730e+000	5.121745e+000	60	38.5	8.617391e+000	0	0	0	0	0	0	-9.24945	0	0	47.8731	38.7692
DATA	339	4	84	66	1	DarkCorner	DarkCorner	8857.82	204.6	5.152509e+000	5.130487e+000	56	36	6.742470e+000	0	0	0	0	0	0	-13.0042	0	0	42.9674	36.025
DATA	340	4	85	66	1	DarkCorner	DarkCorner	8883.22	204.75	5.159036e+000	5.136986e+000	59	36	8.079915e+000	0	0	0	0	0	0	-8.08234	0	0	45.1352	36.0859
DATA	341	5	1	66	1	DarkCorner	DarkCorner	6736.63	210.1	4.674323e+000	4.495937e+000	66.5	39	8.884437e+000	0	0	0	0	0	0	4.0642	1	0	43.7019	39.8622
DATA	342	5	2	66	1	DarkCorner	DarkCorner	6762.9	210.22	4.467316e+000	4.448222e+000	61	44	9.947981e+000	0	0	0	0	0	0	-1.5875	0	0	50.7771	45.4348
DATA	343	5	3	66	1	DarkCorner	DarkCorner	6787.1	210.43	4.446237e+000	4.427234e+000	63	44.5	1.090464e+001	0	0	0	0	0	0	-0.374235	0	0	52.0157	46.0556
DATA	344	5	4	66	1	DarkCorner	DarkCorner	6814.44	210.065	4.423660e+000	4.404753e+000	60	44.5	1.166407e+001	0	0	0	0	0	0	-3.04456	0	0	49.1849	44.475
DATA	345	5	5	66	1	DarkCorner	DarkCorner	6838.95	210.164	4.403761e+000	4.384939e+000	56.5	42	8.599022e+000	0	0	0	0	0	0	-4.22374	0	0	46.8651	41.5455
DATA	346	5	6	66	1	DarkCorner	DarkCorner	6864.42	210.427	4.383679e+000	4.364942e+000	59	42	6.911694e+000	0	0	0	0	0	0	-4.76672	0	0	57.5363	43.5745
DATA	347	5	7	66	1	DarkCorner	DarkCorner	6889.82	210.705	4.364408e+000	4.345754e+000	59	44	9.513883e+000	0	0	0	0	0	0	-4.53602	0	0	49.8279	43.2258
DATA	348	5	8	66	1	DarkCorner	DarkCorner	6915.26	210.771	4.346049e+000	4.327474e+000	58.5	42	9.325650e+000	0	0	0	0	0	0	-5.03386	0	0	51.4001	43.25
DATA	349	5	9	66	1	DarkCorner	DarkCorner	6940.15	210.692	4.328969e+000	4.310467e+000	58.5	39.5	7.000264e+000	0	0	0	0	0	0	-4.37264	0	0	49.8279	40.7955
DATA	350	5	10	0	0	A_43_P17919	XM_001070979	6965.05	210.308	4.315126e+001	6.087902e+000	100	47	8.641506e+000	0	0	0	0	0	0	39.0664	1	1	45.4864	45.9714
DATA	351	5	11	0	0	A_42_P826221	NM_012933	6990.81	210.519	5.156862e+003	5.157039e+002	4602	47	8.616981e+000	0	0	0	0	0	0	4686.31	1	1	49.8279	46.5641
DATA	352	5	12	0	0	A_64_P011524	NM_001194951	7016.31	210.338	1.291152e+003	1.291855e+002	1213.5	43.5	8.540222e+000	0	0	0	0	0	0	1177.43	1	1	48.5334	45.8462
DATA	353	5	13	0	0	A_44_P258417	NM_001009699	7041.96	210.108	1.638801e+002	1.692997e+001	216	44	1.032513e+001	0	0	0	0	0	0	149.94	1	1	46.8651	43.7429
DATA	354	5	14	0	0	A_64_P164617	A_64_P164617	7067.42	210.427	5.821378e+004	5.821380e+003	52767	44	8.655056e+000	0	0	0	0	0	0	53430.1	1	1	57.5363	42.08
DATA	355	5	15	0	0	A_42_P758933	NM_001106476	7092.48	210.147	1.143402e+004	1.143410e+003	10293	50	1.123981e+001	0	0	0	1	0	0	10524.1	1	1	49.8279	47.4
DATA	356	5	16	0	0	A_42_P573312	NM_001134761	7118.33	210.5	9.696317e+002	9.705462e+001	929.5	40.5	8.569896e+000	0	0	0	0	0	0	894.96	1	1	57.5363	41.5357
DATA	357	5	17	0	0	A_64_P096257	NM_001160228	7143.25	210.356	1.375326e+003	1.375967e+002	1320	41	6.451237e+000	0	0	0	0	0	0	1272.48	1	1	48.5334	40.5385
DATA	358	5	18	0	0	A_43_P15847	NM_178847	7168.89	210.5	1.988368e+002	2.032086e+001	252	40	9.233400e+000	0	0	0	0	0	0	184.392	1	1	56.9804	41.4545
DATA	359	5	19	0	0	A_64_P139962	NM_001000675	7194.42	210.427	4.201874e+000	4.191202e+000	66	38	9.212009e+000	0	0	0	0	0	0	2.29569	0	0	57.5363	39.25
DATA	360	5	20	0	0	A_64_P117474	NM_001000646	7219.67	210.5	6.628079e+000	4.228576e+000	71	43	1.314959e+001	0	0	0	0	0	0	6.17038	1	0	65	49.3871
DATA	361	5	21	0	1	ERCC-00075_180	ERCC-00075_180	7245.1	210.034	4.612319e+001	6.217826e+000	106.5	41	8.586850e+000	0	0	0	0	0	0	43.0044	1	1	43.7019	42.6552
DATA	362	5	22	0	0	A_42_P740730	NM_001012136	7269.97	210.443	3.499289e+001	5.439164e+000	99	43	9.335879e+000	0	0	0	0	0	0	32.6722	1	1	43.7019	44.4118
DATA	363	5	23	0	0	A_42_P702258	NM_017227	7295.89	210.5	4.740141e+001	6.306172e+000	110	42.5	7.357536e+000	0	0	0	0	0	0	44.3097	1	1	56.9804	42.7333
DATA	364	5	24	0	0	A_42_P668800	NM_001127553	7321.06	210.389	1.427314e+003	1.427918e+002	1347	40.5	7.328299e+000	0	0	0	0	0	0	1335.4	1	1	48.2044	39.8056
DATA	365	5	25	0	0	A_42_P842513	NM_031077	7346.57	210.608	4.804245e+003	4.804424e+002	4549	41	8.716103e+000	0	0	0	0	0	0	4498.06	1	1	49.1849	39.4483
DATA	366	5	26	0	0	A_64_P047697	NM_001161835	7372.11	210.5	4.245613e+002	4.265855e+001	452	45	1.019169e+001	0	0	0	0	0	0	397.675	1	1	56.9804	42.8
DATA	367	5	27	0	0	A_42_P660036	NM_001134727	7397.5	210.5	4.387659e+002	4.407240e+001	481	47	8.463037e+000	0	0	0	0	0	0	411.065	1	1	57.5363	45.2059
DATA	368	5	28	0	0	A_64_P095050	A_64_P095050	7422.89	210.5	7.339417e+004	7.339418e+003	68481	49.5	9.349785e+000	0	0	0	0	0	0	68758.7	1	1	56.9804	46.875
DATA	369	5	29	0	0	A_42_P561835	ENSRNOT00000043937	7448.3	210.237	2.718356e+002	2.749870e+001	322	42	8.658607e+000	0	0	0	0	0	0	254.593	1	1	49.5074	40.973
DATA	370	5	30	0	0	A_64_P098774	ENSRNOT00000002068	7473.9	210.414	2.152936e+001	4.678067e+000	89	38	9.370510e+000	0	0	0	0	0	0	20.1541	1	1	47.5395	39.75
DATA	371	5	31	0	0	A_64_P163184	NM_001107855	7498.69	210.386	6.868208e+002	6.880772e+001	699	43.5	1.038098e+001	0	0	0	0	0	0	642.491	1	1	47.5395	45.4118
DATA	372	5	32	0	0	A_42_P549675	NM_080577	7524.18	210.569	4.866274e+003	4.866452e+002	4389	43.5	9.413817e+000	0	0	0	0	0	0	4547.93	1	1	47.8731	43.3438
DATA	373	5	33	0	0	A_64_P287740	NM_001127601	7549.51	210.897	8.034054e+001	9.049405e+000	136	38.5	1.196294e+001	0	0	0	0	0	0	74.999	1	1	47.2035	42.2813
DATA	374	5	34	0	0	A_64_P059545	NM_053477	7575.06	211.175	6.245002e+003	6.245141e+002	5941	39	9.153723e+000	0	0	0	0	0	0	5821.71	1	1	45.4864	40.1724
DATA	375	5	35	0	0	A_44_P465856	NM_199398	7600.58	210.573	4.195686e+000	4.177796e+000	66	39	8.788433e+000	0	0	0	0	0	0	0.176722	0	0	57.5363	39.6452
DATA	376	5	36	0	0	A_42_P714075	NM_031723	7625.69	210.662	2.188801e+003	2.189201e+002	2049	41	7.752717e+000	0	0	0	0	0	0	2033.23	1	1	48.5334	39.7692
DATA	377	5	37	0	0	A_42_P605265	NM_053677	7651.5	210.648	5.273858e+001	6.738342e+000	114	43.5	7.244895e+000	0	0	0	0	0	0	48.8868	1	1	57.5363	43.1667
DATA	378	5	38	0	0	A_64_P047401	NM_001009369	7676.69	210.662	2.628522e+003	2.628858e+002	2541.5	43.5	7.729627e+000	0	0	0	0	0	0	2431.01	1	1	48.5334	43.6667
DATA	379	5	39	0	0	A_64_P018891	A_64_P018891	7702.14	210.61	1.555751e+002	1.611822e+001	210.5	40	7.235824e+000	0	0	0	0	0	0	143.524	1	1	49.8279	40
DATA	380	5	40	0	0	A_64_P026297	NM_022583	7727.54	210.878	6.754938e+001	7.967786e+000	129	39.5	8.401649e+000	0	0	0	0	0	0	62.15	1	1	48.8603	41.1563
DATA	381	5	41	0	0	A_43_P13508	NM_001015031	7752.93	210.786	1.305755e+002	1.372810e+001	180	42.5	9.626592e+000	0	0	0	0	0	0	119.788	1	1	46.8651	43.4667
DATA	382	5	42	0	0	A_64_P077426	XM_001080794	7778.24	211	1.510649e+004	1.510655e+003	13891	44	9.213887e+000	0	0	0	0	0	0	13815.9	1	1	46.8651	42.7941
DATA	383	5	43	0	0	A_44_P370175	NM_031773	7803.79	211	1.202370e+002	1.275781e+001	175	45.5	1.199884e+001	0	0	0	0	0	0	109.6	1	1	46.8651	45.75
DATA	384	5	44	0	0	A_64_P084288	NM_001000496	7829.39	210.931	4.298680e+000	4.291358e+000	72	41	6.971441e+000	0	0	0	0	0	0	2.79552	0	0	53.8203	41.3793
DATA	385	5	45	0	0	A_44_P400936	A_44_P400936	7854.5	211	4.600408e+002	4.620421e+001	483	42	9.268305e+000	0	0	0	0	0	0	416.358	1	1	54.1152	42.5172
DATA	386	5	46	0	0	A_64_P019599	NM_012713	7879.71	210.803	5.865713e+002	5.881543e+001	598	41	9.740294e+000	0	0	0	0	0	0	528.841	1	1	45.4864	41.96
DATA	387	5	47	0	0	A_44_P644356	AI556299	7905.28	211.014	3.134137e+001	5.344961e+000	95	44	8.829390e+000	0	0	0	0	0	0	28.1438	1	1	47.2035	43.6207
DATA	388	5	48	0	0	A_64_P057076	A_64_P057076	7930.78	210.892	3.343486e+002	3.371638e+001	369.5	40	9.228754e+000	0	0	0	0	0	0	298.979	1	1	45.835	42.6452
DATA	389	5	49	0	0	A_64_P087392	NM_001108764	7956.29	210.894	1.821505e+003	1.822029e+002	1683	42	9.536733e+000	0	0	0	0	0	0	1621.77	1	1	45.835	43.5833
DATA	390	5	50	0	0	A_44_P436604	NM_001025627	7981.06	211.121	6.918275e+001	8.191240e+000	129	41	1.038922e+001	0	0	0	0	0	0	61.3311	1	1	46.5243	41.6897
DATA	391	5	51	0	0	A_43_P23200	NM_001107832	8006.48	211.173	6.741668e+002	6.756049e+001	654	45	9.682776e+000	0	0	0	0	0	0	594.919	1	1	49.1849	42.4483
DATA	392	5	52	0	0	A_42_P515876	NM_031097	8032.17	211	8.542388e+002	8.553851e+001	807	41	8.387916e+000	0	0	0	0	0	0	750.216	1	1	46.8651	41
DATA	393	5	53	0	0	A_44_P1047924	NM_053523	8057.5	211	7.625623e+003	7.625753e+002	6630	42	7.093557e+000	0	0	0	0	0	0	6664.82	1	1	48.5334	41.4375
DATA	394	5	54	0	0	A_44_P682668	NM_001014228	8083.09	211.065	1.662470e+002	1.721530e+001	211	41	1.094425e+001	0	0	0	0	0	0	144.58	1	1	54.4085	44.12
DATA	395	5	55	0	0	A_64_P061489	NM_001108746	8108.5	211	2.009136e+001	4.921945e+000	86	41	1.262631e+001	0	0	0	0	0	0	17.3848	1	0	54.1152	46.0968
DATA	396	5	56	0	0	A_64_P047747	NM_182474	8133.71	210.833	1.735922e+003	1.736510e+002	1560	41	9.725797e+000	0	0	0	0	0	0	1494.41	1	1	45.835	41.3448
DATA	397	5	57	0	0	A_64_P091163	NM_001107083	8159.42	211.427	8.853974e+001	9.949955e+000	143	43	9.908700e+000	0	0	0	0	0	0	75.8279	1	1	57.5363	43.5185
DATA	398	5	58	0	0	A_64_P133992	NM_001008825	8184.58	211.427	8.126050e+001	9.319746e+000	137	46	1.054151e+001	0	0	0	0	0	0	69.2315	1	1	57.5363	46.04
DATA	399	5	59	0	0	A_42_P503768	NM_001009466	8210.09	211.386	3.627280e+002	3.656180e+001	362	43	1.038449e+001	0	0	0	0	0	0	307.385	1	1	57.259	45.1364
DATA	400	5	60	0	0	A_44_P400346	ENSRNOT00000059540	8235.5	211.352	8.704720e+001	9.851318e+000	140	41.5	7.162579e+000	0	0	0	0	0	0	73.3708	1	1	57.5363	42.7917
DATA	401	5	61	0	0	A_64_P128438	NM_012591	8260.62	210.718	3.342291e+003	3.342612e+002	2844	40	8.377927e+000	0	0	0	0	0	0	2801.89	1	1	47.5395	42.5
DATA	402	5	62	0	0	A_44_P531758	NM_012935	8286.42	211.427	3.900051e+004	3.900053e+003	32290	44	6.712963e+000	0	0	0	0	0	0	32519.3	1	1	57.5363	43.6286
DATA	403	5	63	0	0	A_43_P10257	NM_203335	8311.57	211.392	7.820365e+003	7.820506e+002	6411.5	44	1.044829e+001	0	0	0	0	0	0	6485.87	1	1	49.1849	43.2
DATA	404	5	64	0	0	A_64_P011744	NM_001108789	8337	211.455	3.459658e+002	3.491616e+001	351	44	9.398511e+000	0	0	0	0	0	0	285.383	1	1	55.8519	44.8261
DATA	405	5	65	0	0	A_44_P282794	NM_001107523	8362.36	211.282	4.780923e+001	6.731524e+000	111	42	1.072576e+001	0	0	0	0	0	0	39.2248	1	1	50.1463	44.5517
DATA	406	5	66	0	0	A_42_P463784	NM_001008526	8387.69	211.338	1.282865e+003	1.283749e+002	1104	44	9.188371e+000	0	0	0	1	0	0	1046.93	1	1	48.5334	44.8846
DATA	407	5	67	0	0	A_42_P630463	NM_022238	8413.42	211.427	3.348244e+002	3.382328e+001	347	45	9.290999e+000	0	0	0	0	0	0	271.79	1	1	57.5363	45.5862
DATA	408	5	68	0	0	A_64_P006728	NM_001108905	8438.51	211.427	2.996341e+003	2.996728e+002	2477	41	9.017903e+000	0	0	0	0	0	0	2419.72	1	1	49.1849	40.5484
DATA	409	5	69	0	0	A_44_P360629	NM_001000030	8464	211.455	1.010400e+002	1.120311e+001	153	38	8.739848e+000	0	0	0	0	0	0	81.1757	1	1	55.8519	40.4194
DATA	410	5	70	0	0	A_64_P024620	NM_001006995	8489.18	211.379	2.337821e+004	2.337826e+003	18442	46	9.883750e+000	0	0	0	0	0	0	18688	1	1	45.4864	45.6333
DATA	411	5	71	0	0	A_64_P091194	ENSRNOT00000049254	8514.94	211.232	1.251610e+004	1.251620e+003	10062.5	43	1.047261e+001	0	0	0	0	0	0	9954.84	1	1	46.5243	43.8286
DATA	412	5	72	0	0	A_44_P334922	NM_022379	8540.33	211.5	4.932598e+000	4.911516e+000	62	41	8.971849e+000	0	0	0	0	0	0	-6.76503	0	0	65	42.3043
DATA	413	5	73	0	0	A_42_P482051	XM_001059157	8565.5	211.5	2.187203e+003	2.187760e+002	1765.5	45	9.928400e+000	0	0	0	1	0	0	1723.39	1	1	49.1849	44.8696
DATA	414	5	74	0	0	A_42_P674742	XM_002726367	8590.76	211.635	7.809948e+003	7.810106e+002	6135	42	9.689447e+000	0	0	0	0	0	0	6126.5	1	1	48.5334	42.6087
DATA	415	5	75	0	0	A_64_P105211	XM_233310	8616.35	211.47	4.057703e+001	6.422285e+000	98	43	9.318440e+000	0	0	0	0	0	0	31.6912	1	1	45.835	42.6
DATA	416	5	76	0	0	A_64_P058523	NM_134385	8641.67	211.5	5.019947e+000	4.998492e+000	65.5	40.5	6.118949e+000	0	0	0	0	0	0	-3.27402	0	0	65	40.1923
DATA	417	5	77	0	0	A_44_P586876	NM_001100805	8667.14	211.278	2.131832e+003	2.132422e+002	1718.5	43	9.680487e+000	0	0	0	0	0	0	1651.62	1	1	47.8731	41.6129
DATA	418	5	78	66	1	DarkCorner	DarkCorner	8692.82	211.763	5.058081e+000	5.036463e+000	58	43	9.531745e+000	0	0	0	0	0	0	-11.477	0	0	49.1849	41.3333
DATA	419	5	79	66	1	DarkCorner	DarkCorner	8717.39	211.912	5.074661e+000	5.052971e+000	60	42	9.532607e+000	0	0	0	0	0	0	-9.34831	0	0	42.9674	43.2
DATA	420	5	80	66	1	DarkCorner	DarkCorner	8743.42	211.573	5.091436e+000	5.069675e+000	58	44.5	9.272260e+000	0	0	0	0	0	0	-10.3701	0	0	57.5363	43.3438
DATA	421	5	81	66	1	DarkCorner	DarkCorner	8768.5	211.765	5.105570e+000	5.083749e+000	58	40.5	8.982959e+000	0	0	0	0	0	0	-10.3395	0	0	46.5243	41.125
DATA	422	5	82	66	1	DarkCorner	DarkCorner	8794.11	211.5	5.118975e+000	5.097096e+000	61.5	43.5	1.023883e+001	0	0	0	0	0	0	-8.91833	0	0	56.9804	43.3684
DATA	423	5	83	66	1	DarkCorner	DarkCorner	8819.92	212.176	5.129629e+000	5.107705e+000	56	38.5	8.016667e+000	0	0	0	0	0	0	-11.9795	0	0	47.5395	39.1852
DATA	424	5	84	66	1	DarkCorner	DarkCorner	8844.48	212.435	5.138496e+000	5.116534e+000	56	37	8.305497e+000	0	0	0	0	0	0	-12.5381	0	0	43.7019	38.5588
DATA	425	5	85	66	1	DarkCorner	DarkCorner	8870.42	211.573	5.147332e+000	5.125332e+000	60	36	6.676306e+000	0	0	0	0	0	0	-8.934	0	0	57.5363	36.28
DATA	426	6	1	66	1	DarkCorner	DarkCorner	6750.36	218.721	4.470941e+000	4.454033e+000	63	45.5	9.908544e+000	0	0	0	0	0	0	1.22277	0	0	42.9674	45.1667
DATA	427	6	2	66	1	DarkCorner	DarkCorner	6775.65	217.583	4.450002e+000	4.430982e+000	61	47	8.649860e+000	0	0	0	0	0	0	-1.012	0	0	48.5334	48.1515
DATA	428	6	3	66	1	DarkCorner	DarkCorner	6800.67	217.5	4.429009e+000	4.410079e+000	60	45	1.522003e+001	0	0	0	0	0	0	-3.44887	0	0	65	49.871
DATA	429	6	4	66	1	DarkCorner	DarkCorner	6826.29	217.283	4.408280e+000	4.389439e+000	56	44	9.861580e+000	0	0	0	0	0	0	-4.42952	0	0	53.5237	44.1622
DATA	430	6	5	66	1	DarkCorner	DarkCorner	6850.23	218.253	4.388659e+000	4.369902e+000	55	42	7.971902e+000	0	0	0	0	0	0	-7.54621	0	0	50.7771	42.7317
DATA	431	6	6	66	1	DarkCorner	DarkCorner	6876.89	217.5	4.368975e+000	4.350302e+000	60	42	8.381124e+000	0	0	0	0	0	0	-3.0797	0	0	65	43.9189
DATA	432	6	7	66	1	DarkCorner	DarkCorner	6901.65	217.167	4.351151e+000	4.332554e+000	55.5	47	1.097855e+001	0	0	0	0	0	0	-5.68146	0	0	41.4593	44.8378
DATA	433	6	8	66	1	DarkCorner	DarkCorner	6927.58	217.573	4.332733e+000	4.314215e+000	58	39	6.770979e+000	0	0	0	0	0	0	-5.98235	0	0	57.5363	38
DATA	434	6	9	0	0	A_64_P034324	NM_001108282	6953.11	217.5	1.097343e+002	1.178486e+001	165.5	45	8.100416e+000	0	0	0	0	0	0	99.2801	1	1	56.9804	45.5897
DATA	435	6	10	0	0	A_64_P071506	ENSRNOT00000025007	6978.5	217.5	2.241045e+001	4.832342e+000	84	46.5	8.656542e+000	0	0	0	0	0	0	20.3514	1	1	57.5363	46.4167
DATA	436	6	11	0	0	A_64_P050705	NM_001106061	7003.89	217.5	2.687334e+002	2.720985e+001	313	45	9.940833e+000	0	0	0	0	0	0	244.913	1	1	56.9804	44.9429
DATA	437	6	12	0	0	A_64_P032242	NM_001008898	7029.42	217.573	1.318771e+001	4.451422e+000	77.5	44	1.139733e+001	0	0	0	0	0	0	12.0597	1	0	65	45.4286
DATA	438	6	13	0	0	A_42_P730320	NM_001013877	7054.58	217.573	6.675837e+001	7.907551e+000	124.5	40	9.595386e+000	0	0	0	0	0	0	61.2404	1	1	57.5363	42
DATA	439	6	14	0	0	A_64_P123073	A_64_P123073	7080	217.545	3.425598e+002	3.451563e+001	388.5	49	9.691313e+000	0	0	0	0	0	0	315.182	1	1	65	47.1923
DATA	440	6	15	0	0	A_64_P064709	NM_001166303	7105.5	217.648	1.293275e+002	1.360192e+001	188.5	42	9.310728e+000	0	0	0	0	0	0	119.325	1	1	57.5363	44
DATA	441	6	16	0	0	A_44_P123381	NM_013012	7130.58	217.573	1.934219e+001	4.626877e+000	83	39	5.236511e+000	0	0	0	0	0	0	17.8914	1	0	57.5363	38.5
DATA	442	6	17	0	0	A_44_P557487	NM_053617	7156.42	217.573	2.653857e+001	4.962393e+000	87.5	42	8.059549e+000	0	0	0	0	0	0	24.6068	1	1	57.5363	42.7941
DATA	443	6	18	0	0	A_64_P084971	NM_017007	7181.38	217.556	2.901058e+004	2.901061e+003	27049	38	9.931432e+000	0	0	0	0	0	0	26955.4	1	1	48.2044	40.3333
DATA	444	6	19	0	0	A_42_P770556	NM_033096	7206.78	217.811	9.292717e+003	9.292811e+002	8392	42	1.497758e+001	0	0	0	1	0	0	8651.27	1	1	48.5334	46.4286
DATA	445	6	20	0	0	A_64_P023381	XM_001073278	7232.5	218	9.185152e+001	1.008697e+001	148	46.5	1.520173e+001	0	0	0	0	0	0	85.6603	1	1	54.1152	50.4375
DATA	446	6	21	0	0	A_64_P059217	NM_053667	7257.61	217.931	3.193715e+002	3.220732e+001	369.5	44.5	8.542023e+000	0	0	0	0	0	0	298.275	1	1	53.8203	44.3846
DATA	447	6	22	0	0	A_44_P286215	NM_001008885	7282.87	217.691	4.347406e+002	4.367244e+001	473.5	43	9.899315e+000	0	0	0	0	0	0	406.515	1	1	45.835	44.9412
DATA	448	6	23	0	0	A_64_P138056	A_64_P138056	7308.31	217.625	5.508721e+002	5.524359e+001	601	43.5	6.265721e+000	0	0	0	0	0	0	515.627	1	1	44.7812	43
DATA	449	6	24	0	0	A_44_P280799	NM_001000654	7334	218	1.217205e+001	4.325007e+000	78	41	9.113655e+000	0	0	0	0	0	0	11.4028	1	0	54.9904	40.6061
DATA	450	6	25	0	0	A_64_P111599	NM_001191586	7359.21	217.806	8.680052e+002	8.689957e+001	877	41	8.688856e+000	0	0	0	0	0	0	813.577	1	1	47.5395	41.0606
DATA	451	6	26	0	0	A_64_P088635	ENSRNOT00000059643	7384.64	217.969	2.443136e+001	4.812825e+000	89.5	46	7.722400e+000	0	0	0	0	0	0	22.9072	1	1	45.1352	45.2759
DATA	452	6	27	0	0	A_64_P042332	NM_021860	7410.5	218	4.164035e+000	4.146238e+000	58	45	8.772636e+000	0	0	0	0	0	0	-7.14651	0	0	65	43.6774
DATA	453	6	28	0	0	A_42_P599080	NM_053753	7435.2	217.845	1.744354e+002	1.792970e+001	231	43	1.059215e+001	0	0	0	0	0	0	163.541	1	1	47.2035	45.5
DATA	454	6	29	0	0	A_44_P576954	NM_001106645	7461	218	7.249406e+002	7.261266e+001	727	40	8.716075e+000	0	0	0	0	0	0	679.416	1	1	54.9904	38.4054
DATA	455	6	30	0	0	A_64_P046687	A_64_P046687	7486.13	217.691	3.693320e+003	3.693553e+002	3467	38.5	8.952578e+000	0	0	0	0	0	0	3459.17	1	1	45.835	41.5
DATA	456	6	31	0	0	A_42_P694928	NM_001109046	7511.5	218	3.337257e+002	3.363016e+001	369	44	9.932958e+000	0	0	0	0	0	0	312.317	1	1	54.1152	45.9459
DATA	457	6	32	0	0	A_64_P032811	NM_001134575	7536.82	217.631	4.008241e+001	5.776113e+000	104	43	1.038402e+001	0	0	0	0	0	0	37.4696	1	1	45.4864	42.8065
DATA	458	6	33	0	0	A_64_P141070	ENSRNOT00000058701	7562.41	218.197	9.183631e+001	1.008363e+001	150	46	1.282867e+001	0	0	0	0	0	0	85.7433	1	1	45.835	46.3333
DATA	459	6	34	0	0	A_64_P093462	NM_001108129	7587.57	218.157	1.534810e+004	1.534815e+003	14289.5	44.5	8.929101e+000	0	0	0	0	0	0	14308.2	1	1	47.5395	42.3929
DATA	460	6	35	0	0	A_42_P799306	ENSRNOT00000015782	7613.45	218.288	5.501547e+001	6.908074e+000	116	40.5	7.963374e+000	0	0	0	0	0	0	51.1974	1	1	48.5334	39.4375
DATA	461	6	36	0	0	A_42_P726743	NM_001108985	7638.23	218.116	1.363623e+003	1.364265e+002	1326.5	40	8.264221e+000	0	0	0	0	0	0	1266.53	1	1	46.5243	39.2121
DATA	462	6	37	0	0	A_44_P228341	NM_001025701	7664	217.774	4.533182e+003	4.533376e+002	4195	44	7.517864e+000	0	0	0	0	0	0	4200.96	1	1	45.4864	44.4194
DATA	463	6	38	0	0	A_42_P571433	NM_031059	7689.28	217.971	9.104326e+003	9.104423e+002	8204	43	9.160692e+000	0	0	0	0	0	0	8417.22	1	1	46.1809	42.4194
DATA	464	6	39	0	0	A_44_P132783	NM_214833	7714.91	218.386	1.288187e+002	1.355427e+001	189	39	9.773290e+000	0	0	0	0	0	0	118.79	1	1	57.259	40.5357
DATA	465	6	40	0	0	A_44_P119215	NM_001108941	7740.42	218.427	1.027207e+002	1.110817e+001	161	43	1.016101e+001	0	0	0	0	0	0	94.458	1	1	57.5363	44.3939
DATA	466	6	41	0	0	A_44_P124259	XM_345871	7765.21	217.97	7.120296e+001	8.287446e+000	133	44	9.742722e+000	0	0	0	0	0	0	65.2803	1	1	45.835	43.5714
DATA	467	6	42	0	0	A_44_P422063	NM_001107631	7791	218.455	3.623960e+002	3.648844e+001	402.5	45	9.210550e+000	0	0	0	0	0	0	331.195	1	1	55.8519	43.8824
DATA	468	6	43	0	0	A_44_P1033023	NM_013063	7816.03	218.147	7.703691e+003	7.703809e+002	6868	43.5	1.359817e+001	0	0	0	0	0	0	7016.73	1	1	46.8651	46.8438
DATA	469	6	44	0	0	A_64_P121618	NM_001134542	7841.61	218.406	4.341622e+002	4.362704e+001	465	40	8.168106e+000	0	0	0	0	0	0	394.042	1	1	47.5395	40.8889
DATA	470	6	45	0	0	A_64_P042188	ENSRNOT00000034890	7867.13	217.855	7.383125e+003	7.383251e+002	6789.5	39.5	6.918537e+000	0	0	0	0	0	0	6675.25	1	1	45.4864	39.8846
DATA	471	6	46	0	0	A_42_P561616	AI234869	7892.3	217.746	1.153101e+003	1.153909e+002	1060.5	42	8.746047e+000	0	0	0	0	0	0	1038.5	1	1	45.835	42.08
DATA	472	6	47	0	0	A_42_P588606	NM_001134544	7918	218.455	2.484744e+002	2.522266e+001	292	41	8.781868e+000	0	0	0	0	0	0	222.879	1	1	55.8519	42.3939
DATA	473	6	48	0	0	A_42_P568897	NM_001005563	7943.37	217.919	9.138423e+002	9.148784e+001	895	40	9.255048e+000	0	0	0	0	0	0	816.196	1	1	44.0646	42.4516
DATA	474	6	49	0	0	A_64_P096356	NM_012640	7968.92	217.778	2.136126e+004	2.136130e+003	19524	41	1.051793e+001	0	0	0	0	0	0	18994.6	1	1	45.4864	42.3704
DATA	475	6	50	0	0	A_64_P006418	A_64_P006418	7994.35	218.222	7.061477e+003	7.061614e+002	6396	44	7.838566e+000	0	0	0	0	0	0	6251.19	1	1	47.5395	41.0357
DATA	476	6	51	0	0	A_64_P156389	A_64_P156389	8019.63	218.427	1.193518e+002	1.272459e+001	175	41	9.868303e+000	0	0	0	0	0	0	105.172	1	1	49.1849	39.7391
DATA	477	6	52	0	0	A_42_P576446	NM_001107673	8044.74	218.271	1.558150e+004	1.558156e+003	13471.5	43	6.089252e+000	0	0	0	0	0	0	13665.6	1	1	46.8651	42.4571
DATA	478	6	53	0	0	A_64_P022804	A_64_P022804	8070.23	218.198	1.752639e+003	1.753205e+002	1589.5	41.5	8.796290e+000	0	0	0	0	0	0	1529.62	1	1	50.4627	42.0667
DATA	479	6	54	0	0	A_64_P162356	A_64_P162356	8095.68	218.382	1.770765e+004	1.770770e+003	15474	43.5	1.278869e+001	0	0	0	0	0	0	15377.9	1	1	46.5243	46.3667
DATA	480	6	55	0	0	A_44_P266776	NM_199388	8121.06	218.031	1.232566e+003	1.233387e+002	1136	41	7.812615e+000	0	0	0	0	0	0	1064.94	1	1	45.835	41.4138
DATA	481	6	56	0	0	A_64_P035066	NM_001008960	8146.5	218.5	6.413767e+000	4.568074e+000	75	43	9.177796e+000	0	0	0	0	0	0	5.51341	1	0	57.5363	43.9429
DATA	482	6	57	0	0	A_64_P072728	NM_001100667	8171.94	218.304	6.596144e+003	6.596301e+002	5805	46	1.131501e+001	0	0	0	0	0	0	5640.46	1	1	46.1809	46.6207
DATA	483	6	58	0	0	A_64_P028446	NM_001106007	8197.17	218.536	3.462459e+003	3.462761e+002	2961	45	9.644773e+000	0	0	0	0	0	0	2945.43	1	1	47.2035	44.4545
DATA	484	6	59	0	0	A_44_P251212	NM_031715	8222.58	218.573	4.337348e+004	4.337350e+003	36057	41.5	8.837123e+000	0	0	0	0	0	0	36701	1	1	57.5363	42.9
DATA	485	6	60	0	0	A_42_P818240	NM_001108334	8248.33	218.629	1.453759e+004	1.453766e+003	12339	42	7.081196e+000	0	0	0	0	0	0	12234.6	1	1	47.8731	43.68
DATA	486	6	61	0	0	A_64_P023122	NM_001080208	8273.5	218.5	1.410372e+001	4.853966e+000	79	40	7.867284e+000	0	0	0	0	0	0	11.8061	1	0	65	40.9063
DATA	487	6	62	0	0	A_44_P217821	NM_001107292	8298.95	218.523	6.035340e+002	6.053379e+001	578	43	7.639507e+000	0	0	0	0	0	0	502.494	1	1	55.8519	45.1724
DATA	488	6	63	0	0	A_64_P007372	NM_001105895	8324.25	218.618	6.258019e+000	4.736276e+000	74.5	43	8.066768e+000	0	0	0	0	0	0	5.18252	1	0	46.5243	42.5357
DATA	489	6	64	0	0	A_42_P792382	NM_017257	8349.61	218.406	6.525263e+003	6.525434e+002	5375	48	1.120595e+001	0	0	0	0	0	0	5374.73	1	1	47.5395	48.64
DATA	490	6	65	0	0	A_43_P12232	NM_022512	8375.12	218.721	2.119537e+003	2.120069e+002	1783.5	44	1.053063e+001	0	0	0	0	0	0	1736.57	1	1	45.835	45.5862
DATA	491	6	66	0	0	A_64_P158475	A_64_P158475	8400.52	218.638	6.429759e+003	6.429936e+002	5366	43	8.637063e+000	0	0	0	0	0	0	5240.1	1	1	47.5395	43.4333
DATA	492	6	67	0	0	A_64_P043361	NM_001197023	8425.86	218.593	1.338835e+002	1.422132e+001	175.5	46	9.647310e+000	0	0	0	0	0	0	108.542	1	1	56.9804	44.6
DATA	493	6	68	0	0	A_64_P080851	NM_001105753	8451.48	218.643	3.803396e+001	6.140386e+000	102	42	8.726411e+000	0	0	0	0	0	0	30.675	1	1	41.8414	41.3103
DATA	494	6	69	0	0	A_44_P129330	NM_001107505	8476.5	218.5	2.076858e+003	2.077423e+002	1728	42	7.171529e+000	0	0	0	0	0	0	1666.62	1	1	49.1849	43.3913
DATA	495	6	70	0	0	A_64_P008827	NM_001014012	8501.94	218.551	2.480549e+003	2.481027e+002	2054	47	1.054314e+001	0	0	0	0	0	0	1980.7	1	1	47.5395	46.6316
DATA	496	6	71	0	0	A_64_P026222	NM_001101019	8527.5	218.648	7.573159e+001	9.016219e+000	129	45	1.021437e+001	0	0	0	0	0	0	60.1778	1	1	57.5363	45.2
DATA	497	6	72	0	0	A_64_P067749	NM_012659	8552.68	218.618	2.577369e+004	2.577374e+003	20198	44	9.514442e+000	0	0	0	0	0	0	20384.7	1	1	46.5243	44.7308
DATA	498	6	73	0	0	A_44_P362981	NM_145878	8578.42	218.573	4.500438e+004	4.500440e+003	34023.5	40	4.317186e+000	0	0	0	0	0	0	35430.1	1	1	57.5363	41.2667
DATA	499	6	74	0	0	A_64_P146654	NM_031698	8603.7	218.9	3.454137e+003	3.454493e+002	2673	44	7.675285e+000	0	0	0	0	0	0	2707.64	1	1	47.2035	42.08
DATA	500	6	75	0	0	A_42_P548800	NM_001007696	8628.87	218.9	5.604819e+003	5.605040e+002	4385	41	6.008541e+000	0	0	0	1	0	0	4375.28	1	1	46.8651	40.4444
DATA	501	6	76	0	0	A_44_P310581	BG673348	8654.51	218.873	3.744018e+003	3.744352e+002	2994.5	41	9.969535e+000	0	0	0	0	0	0	2910.92	1	1	47.8731	40.9655
DATA	502	6	77	0	0	A_64_P062269	XM_001067531	8679.97	218.892	2.874839e+002	2.918330e+001	298.5	41	9.031490e+000	0	0	0	0	0	0	222.674	1	1	46.1809	39.1333
DATA	503	6	78	66	1	DarkCorner	DarkCorner	8704.97	219.721	5.057617e+000	5.036001e+000	57.5	40	1.036117e+001	0	0	0	0	0	0	-11.694	0	0	43.7019	41.9231
DATA	504	6	79	66	1	DarkCorner	DarkCorner	8730.5	219	5.075020e+000	5.053329e+000	57	43.5	9.490853e+000	0	0	0	0	0	0	-10.7252	0	0	65	42.975
DATA	505	6	80	66	1	DarkCorner	DarkCorner	8756	219	5.090200e+000	5.068444e+000	58	40	9.607420e+000	0	0	0	0	0	0	-12.0998	0	0	54.9904	39.8571
DATA	506	6	81	66	1	DarkCorner	DarkCorner	8781.27	219.091	5.103648e+000	5.081834e+000	62	42	7.968617e+000	0	0	0	0	0	0	-7.15142	0	0	49.1849	41.1333
DATA	507	6	82	66	1	DarkCorner	DarkCorner	8807.16	219.143	5.115809e+000	5.093943e+000	57.5	41	9.623791e+000	0	0	0	0	0	0	-10.4494	0	0	46.8651	40.6122
DATA	508	6	83	66	1	DarkCorner	DarkCorner	8833.38	219.121	5.126381e+000	5.104470e+000	59	42	1.067920e+001	0	0	0	0	0	0	-10.2994	0	0	45.4864	42.0465
DATA	509	6	84	66	1	DarkCorner	DarkCorner	8857.5	219	5.134490e+000	5.112545e+000	61	36.5	7.906324e+000	0	0	0	0	0	0	-7.43615	0	0	54.1152	38.2368
DATA	510	6	85	66	1	DarkCorner	DarkCorner	8883.19	219.186	5.140779e+000	5.118807e+000	63.5	36	8.458456e+000	0	0	0	0	0	0	-6.46481	0	0	43.7019	35.6868
DATA	511	7	1	66	1	DarkCorner	DarkCorner	6737.37	224.264	4.477515e+000	4.464626e+000	62.5	41	9.828339e+000	0	0	0	0	0	0	2.05908	0	0	52.9257	42.0612
DATA	512	7	2	66	1	DarkCorner	DarkCorner	6761.73	224.09	4.456422e+000	4.447302e+000	64.5	48	8.010221e+000	0	0	0	0	0	0	2.60214	0	0	45.835	47.8667
DATA	513	7	3	66	1	DarkCorner	DarkCorner	6788.49	225.181	4.432840e+000	4.413894e+000	61	51	1.251769e+001	0	0	0	0	0	0	-1.58741	0	0	47.8731	53.3226
DATA	514	7	4	66	1	DarkCorner	DarkCorner	6812.53	224.534	4.413611e+000	4.394747e+000	58.5	48	1.353222e+001	0	0	0	0	0	0	-3.3175	0	0	49.1849	48.5263
DATA	515	7	5	66	1	DarkCorner	DarkCorner	6838.58	224.573	4.392866e+000	4.374261e+000	64	43	1.030428e+001	0	0	0	0	0	0	0.343406	0	0	57.5363	43.9412
DATA	516	7	6	66	1	DarkCorner	DarkCorner	6864.5	225	4.372675e+000	4.353986e+000	59	44	8.323375e+000	0	0	0	0	0	0	-2.55354	0	0	54.1152	44.5833
DATA	517	7	7	66	1	DarkCorner	DarkCorner	6889.43	225.595	4.353862e+000	4.335253e+000	58	45.5	8.679272e+000	0	0	0	0	0	0	-5.25198	0	0	47.8731	45.0588
DATA	518	7	8	66	1	DarkCorner	DarkCorner	6915.32	224.893	4.336054e+000	4.317521e+000	59	43	1.156708e+001	0	0	0	0	0	0	-4.2726	0	0	42.2201	44.5938
DATA	519	7	9	0	0	A_64_P051297	NM_001107416	6940.24	225	4.866806e+003	4.866996e+002	4454	43	6.215511e+000	0	0	0	0	0	0	4399.73	1	1	46.8651	42.1515
DATA	520	7	10	0	0	A_64_P162378	A_64_P162378	6965.5	225	8.030952e+004	8.030953e+003	73085	47	7.951782e+000	0	0	0	0	0	0	72877.1	1	1	54.1152	47.2647
DATA	521	7	11	0	0	A_64_P030634	ENSRNOT00000042606	6991.08	225.099	1.191382e+002	1.265549e+001	172	45	8.043153e+000	0	0	0	0	0	0	108.509	1	1	46.8651	45.6923
DATA	522	7	12	0	0	A_64_P110009	NM_024392	7016.31	224.986	1.069281e+004	1.069289e+003	9463	41	1.161308e+001	0	0	0	0	0	0	9772.02	1	1	47.2035	44.6364
DATA	523	7	13	0	0	A_42_P618145	NM_001080783	7041.79	224.806	4.048601e+003	4.048824e+002	3725	38	9.887434e+000	0	0	0	0	0	0	3711.96	1	1	47.5395	40.9429
DATA	525	7	15	0	0	A_64_P101770	NM_001000074	7092.5	225	6.546268e+000	4.265966e+000	69	52.5	1.135610e+001	0	0	0	0	0	0	6.03765	1	0	54.1152	53.2667
DATA	526	7	16	0	0	A_42_P735934	NM_001105729	7118.17	225	5.592811e+003	5.592969e+002	5247	43	1.103298e+001	0	0	0	0	0	0	5172.11	1	1	46.8651	46.68
DATA	528	7	18	0	0	A_42_P718331	NM_133522	7168.87	225	1.903461e+003	1.903921e+002	1829	45	8.828507e+000	0	0	0	0	0	0	1768.5	1	1	48.5334	45.8438
DATA	529	7	19	0	0	A_64_P118054	NM_001037651	7194.5	225	3.200850e+001	5.261697e+000	96	40	1.052404e+001	0	0	0	0	0	0	29.7995	1	1	54.1152	41.7727
DATA	530	7	20	0	0	A_64_P044613	A_64_P044613	7219.58	225.427	7.910392e+004	7.910393e+003	75397.5	48	1.497262e+001	0	0	0	0	0	0	73779	1	1	57.5363	52.4444
DATA	531	7	21	0	0	A_43_P13241	NM_134334	7244.93	224.567	2.890017e+004	2.890020e+003	27107	42	9.683478e+000	0	0	0	0	0	0	26994.2	1	1	45.835	45.3714
DATA	532	7	22	0	0	A_44_P524748	NM_001000712	7270.5	225.352	4.174239e+000	4.156398e+000	64.5	45.5	8.861786e+000	0	0	0	0	0	0	-0.757023	0	0	57.5363	46.2813
DATA	533	7	23	0	0	A_64_P126797	ENSRNOT00000048363	7296.13	224.857	1.018113e+002	1.099519e+001	163	40.5	1.006649e+001	0	0	0	0	0	0	95.3364	1	1	45.4864	42.6176
DATA	535	7	25	0	0	A_42_P730411	NM_001012181	7346.24	225.227	1.434006e+003	1.434605e+002	1402	44	6.211257e+000	0	0	0	0	0	0	1344.92	1	1	48.8603	42.8333
DATA	536	7	26	0	0	A_64_P049501	NM_001047970	7372.09	225.386	5.397479e+001	6.804545e+000	116	45	8.023889e+000	0	0	0	0	0	0	50.6448	1	1	57.259	42.129
DATA	537	7	27	0	0	A_42_P623688	NM_031031	7397.22	225.176	1.249108e+004	1.249115e+003	11476	45.5	7.285777e+000	0	0	0	0	0	0	11722.4	1	1	48.2044	43.9444
DATA	538	7	28	0	0	A_42_P601217	NM_053460	7422.58	225.427	2.317503e+002	2.354242e+001	281.5	45	9.258823e+000	0	0	0	0	0	0	217.488	1	1	57.5363	45.875
DATA	540	7	30	0	0	A_42_P791872	NM_001135174	7473.23	224.727	1.192086e+004	1.192094e+003	11082	40	7.906264e+000	0	0	0	0	0	0	11177.9	1	1	45.4864	40.1351
DATA	542	7	32	0	0	A_44_P557172	NM_177936	7524.42	225.427	1.012012e+002	1.093913e+001	161	43	1.079472e+001	0	0	0	0	0	0	94.7406	1	1	65	42.9429
DATA	543	7	33	0	0	A_64_P118812	NM_001000512	7549.67	225.5	4.175743e+000	4.168577e+000	70	46	1.090865e+001	0	0	0	0	0	0	2.78864	0	0	57.5363	45.4643
DATA	544	7	34	0	0	A_64_P019425	NM_172035	7575.42	225.427	2.472758e+002	2.507570e+001	299.5	44.5	9.757577e+000	0	0	0	0	0	0	230.887	1	1	57.5363	43.6071
DATA	545	7	35	0	0	A_42_P726743	NM_001108985	7600.12	225.384	1.420925e+003	1.421537e+002	1371	40.5	9.006841e+000	0	0	0	0	0	0	1324.64	1	1	48.5334	39.4167
DATA	546	7	36	0	0	A_42_P558703	NM_001106810	7625.69	225.455	7.747690e+002	7.758949e+001	795	40	1.029005e+001	0	0	0	0	0	0	720.933	1	1	52.3208	40.3333
DATA	547	7	37	0	0	A_42_P619806	TC590118	7651.41	224.824	6.389599e+002	6.403304e+001	652	45	8.000992e+000	0	0	0	0	0	0	593.274	1	1	46.5243	44.6429
DATA	548	7	38	0	0	A_64_P072247	XM_001055615	7676.67	225.5	8.324083e+001	9.322066e+000	137	43	8.619308e+000	0	0	0	0	0	0	77.1199	1	1	57.5363	43.3226
DATA	549	7	39	0	0	A_64_P104164	A_64_P104164	7702.44	225.266	3.026057e+004	3.026060e+003	28658.5	43	8.387238e+000	0	0	0	0	0	0	27963.8	1	1	50.7771	42.9063
DATA	550	7	40	0	0	A_42_P672103	NM_021770	7727.61	225.278	2.429936e+004	2.429939e+003	22546	43	8.750743e+000	0	0	0	0	0	0	22395.1	1	1	48.5334	42.963
DATA	551	7	41	0	0	A_64_P090942	NM_001000406	7752.89	225.5	1.287661e+001	4.422188e+000	78.5	45	9.392083e+000	0	0	0	0	0	0	11.8337	1	0	56.9804	45.9706
DATA	552	7	42	0	0	A_64_P149491	ENSRNOT00000025458	7778.5	225.5	1.395900e+002	1.458983e+001	195	47	9.439601e+000	0	0	0	0	0	0	127.885	1	1	57.5363	46.5
DATA	553	7	43	0	0	A_42_P552441	NR_002704	7803.44	225.733	2.280545e+004	2.280549e+003	20710	48	1.300346e+001	0	0	0	0	0	0	20826.5	1	1	49.1849	50.44
DATA	554	7	44	0	0	A_64_P060419	ENSRNOT00000055060	7829.59	225.594	4.290991e+000	4.272651e+000	63	40.5	9.697387e+000	0	0	0	0	0	0	-3.36124	0	0	47.8731	42.6563
DATA	555	7	45	0	0	A_44_P161233	NM_019165	7854.44	225.106	1.655168e+003	1.655723e+002	1560	42	9.596794e+000	0	0	0	0	0	0	1500.67	1	1	45.4864	42.5385
DATA	556	7	46	66	-1	(-)3xSLv1	NegativeControl	7879.89	225.5	4.322869e+000	4.304393e+000	56	41	6.483773e+000	0	0	0	0	0	0	-10.7339	0	0	56.9804	40.6563
DATA	557	7	47	0	0	A_43_P12519	NM_031114	7905.06	225.389	1.183864e+004	1.183872e+003	10221	44	8.731676e+000	0	0	0	0	0	0	10650.9	1	1	48.2044	44.3704
DATA	558	7	48	0	0	A_44_P317600	NM_012612	7930.63	225.36	2.128004e+002	2.171800e+001	257.5	39	8.299210e+000	0	0	0	0	0	0	190.655	1	1	48.8603	41.7576
DATA	559	7	49	0	0	A_64_P034166	A_64_P034166	7956.33	225.5	6.154589e+000	4.401549e+000	75	42.5	1.018493e+001	0	0	0	0	0	0	5.49032	1	0	57.5363	42.5938
DATA	560	7	50	0	0	A_64_P024585	NM_001109337	7981.58	225.573	1.102074e+001	4.514098e+000	77	41	8.891635e+000	0	0	0	0	0	0	9.78816	1	0	57.5363	40.4211
DATA	561	7	51	0	0	A_42_P654682	NM_012724	8006.95	225.523	1.536976e+001	4.658379e+000	78	40	8.965174e+000	0	0	0	0	0	0	13.5886	1	0	65	40.1786
DATA	562	7	52	0	0	A_42_P524610	NM_001108992	8031.99	225.616	3.322779e+003	3.323072e+002	2934	43	6.355017e+000	0	0	0	0	0	0	2924.21	1	1	48.8603	41.6429
DATA	563	7	53	0	0	A_64_P046677	NM_020093	8057.58	225.573	3.254297e+001	5.504334e+000	94.5	43	6.901087e+000	0	0	0	0	0	0	28.5011	1	1	65	42
DATA	564	7	54	0	0	A_64_P042742	XM_001061779	8083.09	225.614	3.951262e+002	3.976367e+001	414.5	39	9.090405e+000	0	0	0	0	0	0	344.351	1	1	57.259	40.2759
DATA	565	7	55	0	0	A_64_P058430	ENSRNOT00000062073	8108.5	225.648	2.356991e+001	5.065346e+000	87	41.5	9.549689e+000	0	0	0	0	0	0	20.4386	1	1	57.5363	42.9
DATA	566	7	56	0	0	A_42_P479251	NM_001108686	8133.5	225.5	1.048336e+004	1.048346e+003	8803	42	7.883869e+000	0	0	0	0	0	0	9045.01	1	1	49.1849	43.6538
DATA	567	7	57	0	0	A_42_P777329	NM_001106943	8159.18	225.639	7.522074e+002	7.535700e+001	711	45.5	1.139612e+001	0	0	0	0	0	0	645.636	1	1	47.8731	45.3529
DATA	568	7	58	0	0	A_64_P103414	NM_001106472	8184.5	225.648	2.144407e+001	5.033026e+000	88	44	1.192586e+001	0	0	0	0	0	0	18.3103	1	0	57.5363	44.8214
DATA	569	7	59	0	0	A_64_P082164	A_64_P082164	8210.09	225.614	1.307831e+002	1.385630e+001	181	44	1.423254e+001	0	0	0	0	0	0	111.077	1	1	65	47.2609
DATA	570	7	60	0	0	A_42_P702729	NM_001107557	8235.35	225.88	2.141005e+003	2.141499e+002	1854	42	7.194346e+000	0	0	0	0	0	0	1808.89	1	1	48.8603	41.4828
DATA	571	7	61	0	0	A_64_P130922	A_64_P130922	8260.81	225.794	5.744650e+002	5.763251e+001	549	41	8.106836e+000	0	0	0	0	0	0	482.75	1	1	46.1809	41.5185
DATA	572	7	62	0	0	A_42_P509843	NM_001100480	8286.11	225.857	7.097601e+002	7.112826e+001	657	44	8.905487e+000	0	0	0	1	0	0	593.27	1	1	46.8651	43.6667
DATA	573	7	63	0	0	A_64_P110759	A_64_P110759	8311.5	226	6.218242e+001	7.780341e+000	120	42.5	6.646398e+000	0	0	0	0	0	0	51.6997	1	1	54.1152	42.7857
DATA	574	7	64	0	0	A_64_P006235	A_64_P006235	8337.14	225.808	1.248026e+003	1.248912e+002	1103	41	8.861551e+000	0	0	0	0	0	0	1032	1	1	47.5395	42.2069
DATA	575	7	65	0	0	A_44_P506064	NM_001191778	8362.3	225.909	4.421001e+001	6.471940e+000	105	46	8.170314e+000	0	0	0	0	0	0	36.3654	1	1	45.835	46.9333
DATA	576	7	66	0	0	A_64_P075425	A_64_P075425	8387.72	225.889	1.543640e+004	1.543647e+003	12702.5	44	1.087659e+001	0	0	0	0	0	0	12630.2	1	1	47.8731	45.3214
DATA	577	7	67	0	0	A_42_P544898	NM_001108279	8413.18	225.753	1.711052e+002	1.776482e+001	208.5	44	9.394576e+000	0	0	0	1	0	0	139.262	1	1	47.5395	44.5161
DATA	578	7	68	0	0	A_44_P837192	ENSRNOT00000038251	8439.01	226.371	2.868439e+001	5.593158e+000	90	44	9.187278e+000	0	0	0	0	0	0	23.226	1	1	46.8651	43.4643
DATA	580	7	70	0	0	A_44_P325657	NM_001014007	8489.26	226.015	1.896264e+002	1.957308e+001	214	46	1.080253e+001	0	0	0	0	0	0	152.006	1	1	46.1809	44.8065
DATA	581	7	71	0	0	A_64_P004598	ENSRNOT00000024034	8514.83	226	5.597066e+002	5.618248e+001	522	46	1.194531e+001	0	0	0	0	0	0	446.463	1	1	46.8651	44.9032
DATA	582	7	72	0	0	A_42_P607183	XM_001081723	8540.39	226.069	1.772684e+003	1.773360e+002	1448	39	7.545645e+000	0	0	0	1	0	0	1407.29	1	1	53.8203	40.1304
DATA	584	7	74	0	0	A_42_P589190	NM_023104	8590.71	225.987	1.201914e+003	1.202930e+002	1024	41	5.335087e+000	0	0	0	0	0	0	945.626	1	1	49.1849	41.4
DATA	585	7	75	0	0	A_42_P757323	TC587630	8616.28	225.905	3.925090e+003	3.925404e+002	3102	39	6.168100e+000	0	0	0	1	0	0	3074.83	1	1	48.8603	39.0455
DATA	586	7	76	0	0	A_42_P688320	NM_001108569	8641.72	226.2	3.698946e+002	3.732359e+001	355.5	40	7.120088e+000	0	0	0	0	0	0	288.606	1	1	49.1849	40
DATA	587	7	77	0	0	A_44_P224705	NM_031002	8667.37	226.404	1.775162e+002	1.844293e+001	202	35.5	9.833616e+000	0	0	0	0	0	0	137.973	1	1	57.8122	38.7
DATA	588	7	78	0	0	A_42_P481849	NM_001100563	8692.38	226	2.624661e+003	2.625141e+002	2046	38	8.818997e+000	0	0	0	1	0	0	2032.57	1	1	48.5334	39.1333
DATA	589	7	79	66	1	DarkCorner	DarkCorner	8717.91	226.386	5.058695e+000	5.037074e+000	58	42.5	7.018218e+000	0	0	0	0	0	0	-10.0181	0	0	65	42.1538
DATA	590	7	80	66	1	DarkCorner	DarkCorner	8743.42	226.427	5.074377e+000	5.052689e+000	58.5	39	9.481694e+000	0	0	0	0	0	0	-12.7319	0	0	57.5363	39.5429
DATA	591	7	81	66	1	DarkCorner	DarkCorner	8768.58	226.354	5.088557e+000	5.066808e+000	55.5	40	8.789486e+000	0	0	0	0	0	0	-13.9153	0	0	50.7771	40.5385
DATA	592	7	82	66	1	DarkCorner	DarkCorner	8793.51	226.279	5.101106e+000	5.079304e+000	60	41	5.714496e+000	0	0	0	0	0	0	-9.92724	0	0	42.9674	41.8571
DATA	593	7	83	66	1	DarkCorner	DarkCorner	8819.27	227.127	5.111274e+000	5.089428e+000	57	40.5	1.104116e+001	0	0	0	0	0	0	-10.9911	0	0	45.1352	41.2174
DATA	594	7	84	66	1	DarkCorner	DarkCorner	8845.31	226.655	5.121278e+000	5.099389e+000	57.5	40.5	1.030228e+001	0	0	0	0	0	0	-11.3483	0	0	51.4001	41.9048
DATA	595	7	85	66	1	DarkCorner	DarkCorner	8870.42	226.427	5.128762e+000	5.106841e+000	61	38	8.426024e+000	0	0	0	0	0	0	-8.30308	0	0	57.5363	37.5455
DATA	596	8	1	66	1	DarkCorner	DarkCorner	6749.95	232.184	4.459626e+000	4.440566e+000	62	47	7.956619e+000	0	0	0	0	0	0	-0.179655	0	0	48.5334	46.5357
DATA	597	8	2	66	1	DarkCorner	DarkCorner	6775.42	232.427	4.437759e+000	4.418792e+000	61	46.5	8.164081e+000	0	0	0	0	0	0	-1.53487	0	0	57.5363	48.1563
DATA	598	8	3	66	1	DarkCorner	DarkCorner	6800.58	232.427	4.416978e+000	4.398099e+000	60	48	1.091962e+001	0	0	0	0	0	0	-2.25433	0	0	57.5363	51.8571
DATA	599	8	4	66	1	DarkCorner	DarkCorner	6826.05	232.554	4.396505e+000	4.377714e+000	58	45	1.088649e+001	0	0	0	0	0	0	-3.427	0	0	44.7812	45.6053
DATA	600	8	5	66	1	DarkCorner	DarkCorner	6851.5	232.352	4.376982e+000	4.358274e+000	63	45	9.388520e+000	0	0	0	0	0	0	-0.205455	0	0	57.5363	45.8298
DATA	601	8	6	66	1	DarkCorner	DarkCorner	6877	232.455	4.357908e+000	4.339282e+000	59	47	1.212116e+001	0	0	0	0	0	0	-3.54879	0	0	65	47.5484
DATA	602	8	7	66	1	DarkCorner	DarkCorner	6902.42	232.427	4.339734e+000	4.321185e+000	57.5	46	1.023694e+001	0	0	0	0	0	0	-3.97119	0	0	57.5363	45.5556
DATA	603	8	8	0	0	A_44_P487081	NM_001033951	6927.58	232.427	1.283887e+003	1.284608e+002	1210	43	1.938549e+001	0	0	0	0	0	0	1159.77	1	1	57.5363	50.6667
DATA	604	8	9	0	0	A_64_P054403	NM_001170340	6953.11	232.5	4.908725e+002	4.927412e+001	507	45	8.432018e+000	0	0	0	0	0	0	445.145	1	1	56.9804	44.8529
DATA	605	8	10	0	0	A_44_P665685	NM_001109325	6978.5	232.5	2.062345e+001	4.743345e+000	81.5	47.5	1.306795e+001	0	0	0	0	0	0	18.7713	1	0	57.5363	49.7619
DATA	606	8	11	0	0	A_42_P531684	NM_001014215	7003.89	232.5	2.577925e+002	2.612830e+001	305.5	43	9.490526e+000	0	0	0	1	0	0	235.464	1	1	56.9804	45.1515
DATA	607	8	12	0	0	A_42_P722904	ENSRNOT00000006525	7029.06	232.389	2.570022e+003	2.570372e+002	2440.5	40.5	1.078026e+001	0	0	0	0	0	0	2355.12	1	1	48.2044	43.7059
DATA	608	8	13	0	0	A_42_P514057	NM_031839	7054.58	232.427	2.125866e+002	2.167529e+001	257	40	1.026754e+001	0	0	0	0	0	0	195.425	1	1	57.5363	44.1765
DATA	609	8	14	0	0	A_64_P087459	A_64_P087459	7079.88	232.256	1.093365e+005	1.093365e+004	100496	48	1.075569e+001	0	0	0	0	0	0	100802	1	1	50.7771	47.5278
DATA	610	8	15	0	0	A_42_P581060	NM_001108722	7105.32	232.253	1.238505e+004	1.238512e+003	11450.5	49	1.006262e+001	0	0	0	0	0	0	11449.6	1	1	49.1849	49.5556
DATA	611	8	16	0	0	A_42_P658220	NM_001109598	7130.47	232.278	2.505767e+003	2.506119e+002	2349.5	42	1.281919e+001	0	0	0	0	0	0	2322.32	1	1	48.2044	45.625
DATA	612	8	17	0	0	A_42_P758454	NM_001108101	7156.09	232.324	3.875368e+002	3.897902e+001	419	45	7.743471e+000	0	0	0	0	0	0	360.009	1	1	48.8603	45.5429
DATA	613	8	18	0	0	A_64_P140956	NM_001013141	7181.44	232.26	5.657518e+002	5.672912e+001	565	45.5	1.321710e+001	0	0	0	0	0	0	526.665	1	1	49.5074	47.3929
DATA	614	8	19	0	0	A_42_P508984	NM_001007729	7207.11	232.5	2.562213e+003	2.562552e+002	2468	43.5	1.698443e+001	0	0	0	0	0	0	2389.82	1	1	56.9804	48.7857
DATA	615	8	20	0	0	A_42_P619008	NM_001013079	7232	232.5	6.454515e+003	6.454649e+002	5896	48	9.892729e+000	0	0	0	0	0	0	6030.09	1	1	48.5334	46.5926
DATA	616	8	21	0	0	A_64_P058351	NM_017101	7257.67	232.5	1.233234e+005	1.233234e+004	115358	45.5	7.369477e+000	0	0	0	0	0	0	115383	1	1	57.5363	46.3667
DATA	617	8	22	0	0	A_64_P083800	XM_001058776	7282.88	232.25	8.203355e+001	9.193599e+000	139	48	1.289255e+001	0	0	0	0	0	0	76.8423	1	1	45.835	48.9697
DATA	618	8	23	0	0	A_64_P028088	NM_001106073	7308.44	232.521	7.473523e+002	7.485016e+001	762	41	6.818381e+000	0	0	0	0	0	0	700.783	1	1	48.2044	41.0968
DATA	619	8	24	0	0	A_44_P105441	ENSRNOT00000042202	7333.87	232.3	1.434361e+004	1.434367e+003	13703.5	41	7.351761e+000	0	0	0	0	0	0	13459.8	1	1	47.2035	41.875
DATA	620	8	25	0	0	A_42_P675802	NM_145777	7359	232.648	2.003824e+003	2.004252e+002	1936	44	7.608127e+000	0	0	0	1	0	0	1881.43	1	1	47.2035	43.4286
DATA	621	8	26	0	0	A_64_P018525	ENSRNOT00000027134	7384.58	232.573	5.491678e+002	5.507258e+001	582	46	6.813189e+000	0	0	0	0	0	0	515.78	1	1	57.5363	43.8333
DATA	622	8	27	0	0	A_42_P749382	NM_001106731	7409.94	232.611	1.088855e+004	1.088862e+003	10161	41	7.514046e+000	0	0	0	0	0	0	10227.4	1	1	48.2044	41.8421
DATA	623	8	28	0	0	A_44_P316364	NM_001077675	7435.58	232.573	2.386196e+001	4.778374e+000	90	43	9.235886e+000	0	0	0	0	0	0	22.4094	1	1	57.5363	43.8889
DATA	624	8	29	0	0	A_64_P143596	ENSRNOT00000060139	7461	232.545	9.819327e+001	1.065699e+001	154.5	38	6.862552e+000	0	0	0	0	0	0	92.1801	1	1	55.8519	38.1935
DATA	625	8	30	0	0	A_42_P468723	NM_001191689	7486.18	232.361	8.195952e+002	8.206422e+001	838	40	8.461750e+000	0	0	0	0	0	0	768.92	1	1	47.8731	40.2683
DATA	626	8	31	0	0	A_42_P533792	NM_001106575	7511.44	232.479	1.303617e+004	1.303624e+003	12097	42	9.856358e+000	0	0	0	0	0	0	12220.1	1	1	48.2044	43.1724
DATA	627	8	32	0	0	A_43_P16773	XM_217313	7536.87	232.377	6.046976e+002	6.061214e+001	635	43.5	1.228712e+001	0	0	0	0	0	0	566.229	1	1	46.8651	45.2353
DATA	628	8	33	0	0	A_42_P765830	NM_001106426	7562.17	233	1.864952e+004	1.864957e+003	17414	48	9.581516e+000	0	0	0	0	0	0	17441.9	1	1	46.8651	47.5313
DATA	629	8	34	0	0	A_43_P15073	ENSRNOT00000030771	7587.91	232.614	1.328382e+002	1.392107e+001	192	46	9.661310e+000	0	0	0	0	0	0	124.04	1	1	57.259	46.8182
DATA	630	8	35	0	0	A_42_P538527	NM_001108885	7613.06	232.7	4.698793e+002	4.717268e+001	476	39	8.548615e+000	0	0	0	1	0	0	438.007	1	1	46.8651	38.3103
DATA	631	8	36	0	0	A_64_P037130	A_64_P037130	7638.58	232.573	4.197027e+000	4.179088e+000	60	41	1.033281e+001	0	0	0	0	0	0	-6.91255	0	0	65	41.2727
DATA	632	8	37	0	0	A_44_P536115	NM_023957	7663.74	232.729	5.314522e+003	5.314687e+002	4895.5	42	9.374907e+000	0	0	0	0	0	0	4933.71	1	1	46.8651	42.5
DATA	633	8	38	0	0	A_43_P11800	NM_017059	7689.38	232.764	4.070918e+002	4.092507e+001	440	43	8.994144e+000	0	0	0	0	0	0	377.017	1	1	47.8731	42.8065
DATA	634	8	39	0	0	A_64_P004922	NM_001191924	7714.86	232.789	3.693730e+003	3.693970e+002	3315	43	8.590893e+000	0	0	0	0	0	0	3411.99	1	1	47.2035	42.7
DATA	635	8	40	0	0	A_64_P145058	NM_001107951	7740.16	232.897	9.806568e+002	9.815647e+001	952.5	44	1.125310e+001	0	0	0	0	0	0	903.355	1	1	46.5243	45.9677
DATA	636	8	41	0	0	A_64_P075372	A_64_P075372	7765.5	233	2.610507e+001	4.973358e+000	92	45	9.768927e+000	0	0	0	0	0	0	23.9761	1	1	54.1152	46.2571
DATA	637	8	42	0	0	A_64_P118792	NM_001107034	7791	233	3.691242e+001	5.626678e+000	101.5	49	1.252974e+001	0	0	0	0	0	0	33.7941	1	1	54.9904	51.0741
DATA	638	8	43	0	0	A_42_P469685	NM_001100532	7816.27	233.232	3.640913e+003	3.641162e+002	3347	44.5	1.341626e+001	0	0	0	0	0	0	3322.28	1	1	46.8651	47.0625
DATA	639	8	44	0	0	A_42_P759822	NM_001109673	7841.67	233.058	5.413440e+002	5.430301e+001	563.5	47	1.070013e+001	0	0	0	1	0	0	492.212	1	1	46.5243	45.1667
DATA	640	8	45	0	0	A_64_P014687	NM_012650	7867.27	233	1.248741e+004	1.248749e+003	11963	42	8.626291e+000	0	0	0	0	0	0	11311.5	1	1	43.3362	42.2903
DATA	641	8	46	0	0	A_43_P18505	NM_001012010	7892.69	233	9.372940e+001	1.031591e+001	155	40	8.803688e+000	0	0	0	0	0	0	84.5735	1	1	45.4864	41.1724
DATA	642	8	47	0	0	A_43_P12580	NM_031548	7918	233	1.792842e+002	1.844301e+001	231.5	44	8.276919e+000	0	0	0	0	0	0	161.12	1	1	54.9904	43.6897
DATA	643	8	48	0	0	A_64_P052980	NM_001014786	7943.5	233	2.349092e+001	4.938924e+000	89	39	8.317884e+000	0	0	0	0	0	0	21.0221	1	1	54.1152	41.4828
DATA	644	8	49	0	0	A_64_P397764	ENSRNOT00000028709	7968.5	233	6.813113e+002	6.827069e+001	669	38.5	6.640956e+000	0	0	0	0	0	0	607.107	1	1	54.1152	39.0333
DATA	645	8	50	0	0	A_64_P048408	NM_001008858	7994.5	233	1.753294e+002	1.807253e+001	221	43.5	7.939668e+000	0	0	0	0	0	0	155.518	1	1	54.1152	43.1471
DATA	647	8	52	0	0	A_64_P059500	ENSRNOT00000043917	8045	233	4.443057e+000	4.425740e+000	69	44.5	5.956496e+000	0	0	0	0	0	0	1.0692	0	0	54.9904	42.5625
DATA	648	8	53	0	0	A_64_P220198	AW917371	8070.79	233.014	1.293595e+001	4.630227e+000	79.5	41	8.913197e+000	0	0	0	0	0	0	11.3125	1	0	46.8651	41.1515
DATA	649	8	54	0	0	A_64_P109764	NM_001007756	8095.34	232.794	5.704849e+002	5.722313e+001	560	39	6.884336e+000	0	0	0	0	0	0	496.499	1	1	46.5243	40.4138
DATA	650	8	55	0	0	A_64_P142685	NM_001130498	8121.42	233.427	3.083000e+001	5.446540e+000	95.5	42	8.914759e+000	0	0	0	0	0	0	26.696	1	1	57.5363	42.3704
DATA	651	8	56	0	0	A_44_P395709	NM_134366	8146.02	233	2.965521e+003	2.965865e+002	2646	46	8.583853e+000	0	0	0	1	0	0	2555.04	1	1	44.0646	46.4444
DATA	652	8	57	0	0	A_64_P165071	NM_001110165	8171.77	233.116	1.205043e+004	1.205051e+003	10485	47	8.690089e+000	0	0	0	0	0	0	10328.2	1	1	46.5243	46.2
DATA	653	8	58	0	0	A_64_P009147	ENSRNOT00000042587	8197.58	232.833	7.741647e+001	8.985109e+000	134	47	9.607827e+000	0	0	0	0	0	0	65.9976	1	1	46.1809	46.1034
DATA	654	8	59	0	0	A_42_P647072	NM_178102	8222.65	232.862	1.965409e+003	1.965944e+002	1719	43.5	1.130874e+001	0	0	0	0	0	0	1666.8	1	1	45.4864	44.5357
DATA	655	8	60	0	0	A_64_P125585	XM_001063000	8248.42	233.427	3.944490e+001	6.066310e+000	102	40	7.495154e+000	0	0	0	0	0	0	33.2751	1	1	57.5363	40.9655
DATA	656	8	61	0	0	A_42_P610317	NM_001108225	8273.42	232.985	7.167420e+003	7.167570e+002	5946.5	41	1.003712e+001	0	0	0	0	0	0	6014.19	1	1	45.835	42.3793
DATA	657	8	62	0	0	A_42_P755831	NM_152935	8298.71	232.833	2.793333e+004	2.793337e+003	22983	42	7.280110e+000	0	0	0	0	0	0	23313.8	1	1	45.835	44
DATA	659	8	64	0	0	A_44_P386375	NM_053842	8349.35	232.933	1.285345e+003	1.286207e+002	1167	46	9.507062e+000	0	0	0	0	0	0	1061.44	1	1	43.7019	46.2069
DATA	660	8	65	0	0	A_43_P15565	NM_023953	8375.11	233.5	2.765859e+001	5.481839e+000	92.5	44	8.310157e+000	0	0	0	0	0	0	22.7205	1	1	56.9804	45.3939
DATA	661	8	66	0	0	A_42_P456701	NM_001009697	8400.39	233.149	1.241412e+003	1.242323e+002	1092	41.5	8.250942e+000	0	0	0	0	0	0	1014.39	1	1	46.1809	41.6786
DATA	662	8	67	0	0	A_43_P20388	ENSRNOT00000061333	8425.77	233.116	1.765248e+003	1.765896e+002	1497.5	44	8.221484e+000	0	0	0	0	0	0	1434.96	1	1	46.5243	43.697
DATA	663	8	68	0	0	A_44_P572504	TC585660	8451.42	233.427	1.057140e+003	1.058232e+002	926.5	44	1.002497e+001	0	0	0	0	0	0	854.962	1	1	57.5363	42.1667
DATA	664	8	69	0	0	A_64_P059964	NM_001013858	8476.61	232.91	3.841290e+003	3.841594e+002	3201.5	47	1.146371e+001	0	0	0	0	0	0	3090.89	1	1	46.1809	47.6
DATA	665	8	70	0	0	A_44_P1056293	ENSRNOT00000022862	8501.97	233.215	2.306309e+003	2.306820e+002	1899	46	1.143766e+001	0	0	0	0	0	0	1846.78	1	1	45.835	45.6571
DATA	666	8	71	0	0	A_64_P133276	NM_001107464	8527.5	233.5	1.022902e+003	1.024064e+002	900	42	9.660365e+000	0	0	0	0	0	0	815.191	1	1	57.5363	42.5862
DATA	667	8	72	0	0	A_42_P667782	NM_001009673	8552.94	232.825	1.466566e+003	1.467385e+002	1222	41.5	8.706320e+000	0	0	0	0	0	0	1163.16	1	1	45.4864	44.5
DATA	668	8	73	0	0	A_64_P023624	A_64_P023624	8578.28	233.169	4.238794e+002	4.267296e+001	394	42	6.585843e+000	0	0	0	0	0	0	334.702	1	1	45.4864	41.96
DATA	669	8	74	0	0	A_64_P110130	NM_001106172	8603.99	233.391	1.095029e+003	1.096145e+002	947	41	7.349245e+000	0	0	0	0	0	0	860.905	1	1	46.8651	41.3704
DATA	670	8	75	0	0	A_64_P087728	XM_001078778	8629.11	233.5	2.729910e+002	2.774701e+001	279.5	40	7.187861e+000	0	0	0	0	0	0	213.751	1	1	56.9804	42.0357
DATA	671	8	76	0	0	A_44_P475356	NM_001177823	8654.53	233.242	2.308266e+002	2.361488e+001	243	39	7.736030e+000	0	0	0	0	0	0	180.015	1	1	43.3362	40.3333
DATA	672	8	77	0	0	A_42_P560984	NM_001109179	8679.85	233.348	1.336566e+004	1.336575e+003	10249	40	9.509280e+000	0	0	0	0	0	0	10385.2	1	1	46.8651	39.3438
DATA	673	8	78	0	0	A_42_P566906	NM_001006966	8705.23	233.288	4.405163e+003	4.405449e+002	3444	40	7.765010e+000	0	0	0	0	0	0	3410.95	1	1	45.4864	40.8462
DATA	674	8	79	66	1	DarkCorner	DarkCorner	8730.58	233.573	5.058548e+000	5.036928e+000	60	41.5	9.221574e+000	0	0	0	0	0	0	-9.97754	0	0	65	41.4118
DATA	675	8	80	66	1	DarkCorner	DarkCorner	8755	233.758	5.072603e+000	5.050922e+000	52	39	8.981550e+000	0	0	0	0	0	0	-16.7549	0	0	54.7002	39.8235
DATA	676	8	81	66	1	DarkCorner	DarkCorner	8781.42	233.573	5.086696e+000	5.064955e+000	58	39	7.044636e+000	0	0	0	0	0	0	-12.0158	0	0	57.5363	38.2424
DATA	677	8	82	66	1	DarkCorner	DarkCorner	8806.88	233.662	5.098320e+000	5.076529e+000	59	42	9.983860e+000	0	0	0	0	0	0	-9.79589	0	0	48.8603	42.8205
DATA	678	8	83	66	1	DarkCorner	DarkCorner	8831.6	233.935	5.107717e+000	5.085887e+000	59.5	43	1.128165e+001	0	0	0	0	0	0	-8.6747	0	0	44.0646	42.7805
DATA	679	8	84	66	1	DarkCorner	DarkCorner	8858.25	233.844	5.116358e+000	5.094491e+000	60	41	9.040694e+000	0	0	0	0	0	0	-7.5894	0	0	45.4864	40.7179
DATA	680	8	85	66	1	DarkCorner	DarkCorner	8883	233.545	5.122719e+000	5.100824e+000	58.5	35	7.858504e+000	0	0	0	0	0	0	-10.5761	0	0	65	35.641
DATA	681	9	1	66	1	DarkCorner	DarkCorner	6736.97	239.267	4.464692e+000	4.455310e+000	64	41	9.452053e+000	0	0	0	0	0	0	2.56978	0	0	49.1849	41.6867
DATA	682	9	2	66	1	DarkCorner	DarkCorner	6762.8	239.274	4.442626e+000	4.423638e+000	61	46	9.010451e+000	0	0	0	0	0	0	-1.42373	0	0	54.4085	46.6
DATA	683	9	3	66	1	DarkCorner	DarkCorner	6787.36	239.438	4.422085e+000	4.403229e+000	62	53	9.520615e+000	0	0	0	0	0	0	0.174894	0	0	50.7771	52.7
DATA	684	9	4	66	1	DarkCorner	DarkCorner	6813.1	239.452	4.401329e+000	4.382518e+000	59.5	46	1.118019e+001	0	0	0	0	0	0	-3.23116	0	0	48.2044	47.0571
DATA	685	9	5	66	1	DarkCorner	DarkCorner	6838.67	239.5	4.381352e+000	4.362626e+000	58	42	9.265641e+000	0	0	0	0	0	0	-4.3086	0	0	57.5363	44.1714
DATA	686	9	6	66	1	DarkCorner	DarkCorner	6864.6	239.278	4.362010e+000	4.343366e+000	57	47	1.098497e+001	0	0	0	0	0	0	-6.0793	0	0	48.5334	48.3243
DATA	687	9	7	66	1	DarkCorner	DarkCorner	6890.34	239.522	4.343202e+000	4.324639e+000	59	41	9.563753e+000	0	0	0	0	0	0	-4.54076	0	0	46.5243	43.6818
DATA	688	9	8	0	0	A_44_P195306	NM_019377	6914.68	239.395	3.304766e+004	3.304769e+003	28998	50	1.786857e+001	0	0	0	0	0	0	29825.9	1	1	49.5074	53.7857
DATA	689	9	9	0	0	A_44_P653240	NM_001202552	6939.99	239.616	9.919829e+002	9.929106e+001	937	43	7.246164e+000	0	0	0	0	0	0	898.803	1	1	48.8603	42.9
DATA	690	9	10	0	0	A_64_P012778	ENSRNOT00000038310	6965.48	239.467	8.987711e+000	4.368432e+000	73	48	1.218255e+001	0	0	0	0	0	0	8.17396	1	0	49.1849	50.5946
DATA	691	9	11	0	0	A_43_P11430	NM_001130503	6991	239.729	7.977420e+002	7.988784e+001	786	43	6.461011e+000	0	0	0	0	0	0	728.15	1	1	46.8651	43.3421
DATA	692	9	12	0	0	A_44_P225353	NM_001009678	7016.18	239.639	8.481200e+002	8.491819e+001	816	42	9.805967e+000	0	0	0	0	0	0	776.728	1	1	47.8731	42.9032
DATA	693	9	13	0	0	A_64_P055231	NM_001106620	7041.94	239.389	9.841109e+002	9.850202e+001	982	40	1.177464e+001	0	0	0	0	0	0	904.173	1	1	48.2044	44.7273
DATA	694	9	14	0	0	A_42_P540950	NM_001009541	7067.16	239.329	1.673670e+003	1.674202e+002	1580	46	9.032225e+000	0	0	0	1	0	0	1542.31	1	1	48.2044	45.4054
DATA	695	9	15	0	0	A_64_P135888	ENSRNOT00000029916	7092.58	239.573	4.649467e+000	4.232659e+000	70	48.5	1.148587e+001	0	0	0	0	0	0	4.29678	1	0	57.5363	50.1176
DATA	696	9	16	0	0	A_64_P086448	NM_001008819	7118.06	239.627	1.393128e+002	1.454947e+001	186	45	1.303196e+001	0	0	0	0	0	0	129.084	1	1	45.835	49.7037
DATA	697	9	17	0	0	A_42_P701779	NM_001108048	7143.31	239.662	3.160378e+003	3.160655e+002	2844.5	49.5	1.056368e+001	0	0	0	0	0	0	2935.35	1	1	48.5334	48.9643
DATA	698	9	18	0	0	A_44_P409965	ENSRNOT00000036078	7169	239.545	3.995022e+001	5.779744e+000	101	45	7.934077e+000	0	0	0	0	0	0	37.1875	1	1	55.8519	46.8571
DATA	699	9	19	0	0	A_44_P474037	NM_052807	7194.42	239.573	2.790998e+002	2.821955e+001	330	44	9.243521e+000	0	0	0	0	0	0	260.315	1	1	57.5363	43.5217
DATA	700	9	20	0	0	A_64_P156985	NM_001000385	7219.58	239.573	4.179055e+000	4.161193e+000	57.5	44.5	9.802303e+000	0	0	0	0	0	0	-6.31534	0	0	65	44.4583
DATA	701	9	21	0	0	A_42_P635228	NM_001107651	7245.09	239.614	1.028960e+002	1.109674e+001	165	47	1.089563e+001	0	0	0	0	0	0	96.2881	1	1	65	45.2973
DATA	702	9	22	0	0	A_64_P240508	ENSRNOT00000018000	7270.5	239.648	3.289037e+002	3.315106e+001	370.5	47	1.200978e+001	0	0	0	0	0	0	308.19	1	1	65	48.7879
DATA	703	9	23	0	0	A_64_P026509	NM_020656	7295.91	239.614	1.810199e+002	1.857042e+001	236.5	44	1.306716e+001	0	0	0	0	0	0	169.805	1	1	57.259	46.1622
DATA	704	9	24	0	0	A_42_P570241	NM_177928	7321	239.797	7.901671e+002	7.912514e+001	787	41	7.291792e+000	0	0	0	1	0	0	741.868	1	1	46.8651	41.2647
DATA	706	9	26	0	0	A_64_P032893	TC597420	7371.7	239.857	3.468283e+004	3.468285e+003	32441	45	6.827598e+000	0	0	0	0	0	0	32597.6	1	1	47.2035	43.2667
DATA	707	9	27	0	0	A_64_P043605	NM_001024799	7397.08	239.901	5.536321e+003	5.536475e+002	5146	44	7.878015e+000	0	0	0	0	0	0	5204.46	1	1	46.8651	43.2791
DATA	708	9	28	0	0	A_64_P095890	NM_019337	7422.76	240	1.303409e+004	1.303416e+003	12412	42	7.755978e+000	0	0	0	0	0	0	12252.4	1	1	46.8651	42.2821
DATA	709	9	29	0	0	A_42_P513145	NM_001107288	7448	239.797	7.606576e+002	7.617819e+001	765	41	8.549429e+000	0	0	0	0	0	0	714.828	1	1	46.8651	41.9375
DATA	710	9	30	0	0	A_64_P122317	NM_001108031	7473.14	239.789	2.889788e+002	2.919281e+001	337	40	8.680026e+000	0	0	0	0	0	0	271.433	1	1	47.2035	39.5
DATA	711	9	31	0	0	A_64_P065492	NM_001109101	7499	240	4.211064e+001	5.906852e+000	107	40	1.023126e+001	0	0	0	0	0	0	39.5255	1	1	54.9904	42.3514
DATA	712	9	32	0	0	A_64_P129273	NM_001105871	7524.25	239.847	8.065753e+001	9.069040e+000	144	45	1.386183e+001	0	0	0	0	0	0	75.6327	1	1	47.8731	45.3103
DATA	713	9	33	0	0	A_64_P050748	NM_181824	7549.46	239.984	4.809718e+001	6.353291e+000	110	45	9.873560e+000	0	0	0	0	0	0	45.0487	1	1	44.0646	44.5556
DATA	714	9	34	0	0	A_42_P689755	NM_053306	7574.63	240.043	1.474820e+002	1.532280e+001	203	46	9.639522e+000	0	0	0	1	0	0	137.943	1	1	46.8651	47.359
DATA	715	9	35	0	0	A_64_P039586	TC635481	7600.44	239.973	2.564613e+002	2.598191e+001	306	45	1.256739e+001	0	0	0	0	0	0	239.477	1	1	48.5334	44.5758
DATA	716	9	36	0	0	A_64_P083474	NM_001134731	7625.44	240.028	8.075205e+003	8.075312e+002	7359	39	1.015690e+001	0	0	0	0	0	0	7526.81	1	1	48.2044	39.3448
DATA	718	9	38	0	0	A_42_P763553	NM_001107486	7676.6	239.877	2.081855e+002	2.123590e+001	261	46	1.203745e+001	0	0	0	0	0	0	193.201	1	1	45.1352	45.8519
DATA	719	9	39	0	0	A_44_P151513	NM_001000901	7702.03	239.924	4.217872e+000	4.212587e+000	71	41	6.377322e+000	0	0	0	0	0	0	3.0309	0	0	46.8651	42.7647
DATA	720	9	40	0	0	A_42_P460204	ENSRNOT00000020886	7727.23	239.727	5.273230e+002	5.290018e+001	551.5	42	7.064644e+000	0	0	0	0	0	0	486.85	1	1	45.4864	42.4333
DATA	721	9	41	0	0	A_44_P218147	NM_001013432	7752.91	240.386	5.009050e+001	6.551710e+000	114.5	49	1.141627e+001	0	0	0	0	0	0	46.1152	1	1	57.259	48.7419
DATA	722	9	42	0	0	A_42_P554722	NM_001099758	7778.16	240.452	9.853523e+003	9.853614e+002	9077	45	1.077042e+001	0	0	0	0	0	0	9043.92	1	1	48.2044	45.4242
DATA	723	9	43	0	0	A_44_P135450	XM_223143	7803.58	240.427	6.800702e+002	6.813967e+001	695	57	1.366996e+001	0	0	0	0	0	0	622.158	1	1	65	55.5417
DATA	724	9	44	0	0	A_64_P107329	NM_001013207	7828.8	240.239	1.305750e+004	1.305757e+003	11566	43	8.762508e+000	0	0	0	0	0	0	11904.5	1	1	46.8651	43.3077
DATA	725	9	45	0	0	A_64_P116219	NM_001004085	7854.37	239.735	1.511968e+004	1.511974e+003	13869	44	9.459843e+000	0	0	0	0	0	0	13733.6	1	1	46.5243	43.6364
DATA	726	9	46	0	0	A_44_P147396	NM_001191744	7880	240.455	4.896326e+001	6.514012e+000	112	42	9.527316e+000	0	0	0	0	0	0	44.3089	1	1	55.8519	42.2286
DATA	727	9	47	0	0	A_44_P975743	TC626448	7905.15	239.866	2.788771e+003	2.789104e+002	2482	44	8.363803e+000	0	0	0	0	0	0	2513.62	1	1	46.1809	45.8966
DATA	728	9	48	0	0	A_42_P728472	NM_001007600	7930.6	240.151	2.144999e+004	2.145004e+003	18868	43	7.214176e+000	0	0	0	0	0	0	19254.9	1	1	48.5334	43.5172
DATA	729	9	49	0	0	A_64_P130139	NM_013181	7955.79	240.192	1.708695e+004	1.708700e+003	15026	38	7.505553e+000	0	0	0	0	0	0	15273.8	1	1	48.2044	40
DATA	730	9	50	0	0	A_42_P481087	XM_232226	7981.18	240.347	1.992463e+003	1.992942e+002	1829	43	7.738471e+000	0	0	0	0	0	0	1773.27	1	1	47.5395	42.5641
DATA	731	9	51	0	0	A_44_P102465	NM_001000424	8006.89	240.5	7.938786e+001	9.071007e+000	137.5	42.5	1.024773e+001	0	0	0	0	0	0	70.3324	1	1	65	43.8889
DATA	732	9	52	0	0	A_64_P082557	ENSRNOT00000029274	8032.42	240.427	2.977863e+001	5.320516e+000	96	41	6.878266e+000	0	0	0	0	0	0	26.2586	1	1	57.5363	42.1852
DATA	733	9	53	0	0	A_64_P064873	XM_228599	8057.58	240.427	3.967876e+001	5.947166e+000	103	42	7.006909e+000	0	0	0	0	0	0	34.8235	1	1	57.5363	42
DATA	734	9	54	0	0	A_64_P042298	A_64_P042298	8083.11	240.5	1.058318e+002	1.148134e+001	164	38	8.506073e+000	0	0	0	0	0	0	92.4292	1	1	56.9804	39.2593
DATA	735	9	55	0	0	A_44_P286341	ENSRNOT00000038519	8108.54	240.91	1.338454e+001	4.669540e+000	79	40	7.088034e+000	0	0	0	0	0	0	11.6322	1	0	45.835	40.3667
DATA	736	9	56	0	0	A_44_P994614	NM_001106646	8133.5	240.289	4.029609e+004	4.029611e+003	33802	46	9.448215e+000	0	0	0	0	0	0	34843.9	1	1	49.1849	45.2174
DATA	737	9	57	0	0	A_64_P098354	XM_001066867	8159.33	240.5	1.753123e+002	1.810445e+001	216	47	1.069385e+001	0	0	0	0	0	0	150.808	1	1	57.5363	47.475
DATA	738	9	58	0	0	A_64_P117373	NM_001107752	8184.5	240.5	1.591835e+002	1.655392e+001	207	45	9.205689e+000	0	0	0	0	0	0	136.232	1	1	57.5363	45.8214
DATA	739	9	59	0	0	A_64_P111395	ENSRNOT00000025391	8210.11	240.5	3.746486e+002	3.774219e+001	387	47	9.656974e+000	0	0	0	0	0	0	318.941	1	1	56.9804	46.6667
DATA	740	9	60	0	0	A_64_P059465	XM_229201	8235.5	240.5	1.289159e+001	4.768722e+000	78	42	7.290913e+000	0	0	0	0	0	0	10.9169	1	0	57.5363	42.75
DATA	741	9	61	0	0	A_64_P010852	NM_001106214	8260.68	240.296	2.259985e+004	2.259990e+003	18680.5	40	9.038505e+000	0	0	0	0	0	0	19037.1	1	1	48.2044	40.8621
DATA	742	9	62	0	0	A_64_P024967	NM_001008359	8286.33	240.5	1.071171e+002	1.167359e+001	157.5	42	1.129126e+001	0	0	0	0	0	0	89.7496	1	1	65	43.7241
DATA	743	9	63	0	0	A_44_P278418	NM_012538	8311.58	240.573	1.849076e+001	5.017951e+000	84.5	42	6.331930e+000	0	0	0	0	0	0	15.4111	1	0	57.5363	42.48
DATA	744	9	64	0	0	A_44_P821875	NM_001009500	8337	240.545	4.994896e+001	6.851472e+000	111	41	8.197429e+000	0	0	0	0	0	0	41.4089	1	1	55.8519	42.2581
DATA	745	9	65	0	0	A_64_P066737	A_64_P066737	8362.66	240.729	6.826717e+001	8.296546e+000	124	44	7.771448e+000	0	0	0	0	0	0	56.2953	1	1	47.5395	45.5333
DATA	746	9	66	0	0	A_64_P003943	TC616650	8387.58	240.573	9.236353e+001	1.038125e+001	148.5	40	7.455246e+000	0	0	0	0	0	0	75.7723	1	1	57.5363	39.6071
DATA	747	9	67	0	0	A_64_P047035	ENSRNOT00000066263	8413.42	240.573	8.972898e+000	4.848110e+000	74	42	7.762643e+000	0	0	0	0	0	0	7.32227	1	0	57.5363	42.4828
DATA	748	9	68	0	0	A_64_P113867	NM_001077201	8438.58	240.573	5.667470e+002	5.687665e+001	534	43	9.703687e+000	0	0	0	0	0	0	460.144	1	1	57.5363	42.1923
DATA	749	9	69	0	0	A_64_P013758	NM_012582	8464	240.545	6.230592e+002	6.249154e+001	575	45	1.287860e+001	0	0	0	0	0	0	503.311	1	1	55.8519	45.4615
DATA	750	9	70	0	0	A_44_P303982	NM_001106381	8489.42	240.573	1.147788e+002	1.245539e+001	160.5	45	1.014756e+001	0	0	0	0	0	0	92.2612	1	1	57.5363	47.5172
DATA	751	9	71	0	0	A_64_P048601	A_64_P048601	8514.7	240.493	1.325723e+003	1.326613e+002	1131	39	1.166661e+001	0	0	0	0	0	0	1060.5	1	1	46.8651	41.1212
DATA	752	9	72	0	0	A_44_P304880	NM_001014261	8540.42	240.573	1.298739e+002	1.387516e+001	172	39.5	8.789141e+000	0	0	0	0	0	0	103.399	1	1	57.5363	42.9063
DATA	753	9	73	0	0	A_64_P096767	ENSRNOT00000039549	8566.44	241.099	4.926802e+000	4.905745e+000	61	41	7.826050e+000	0	0	0	0	0	0	-9.57036	0	0	47.8731	42.6
DATA	754	9	74	0	0	A_43_P21810	NM_001025000	8590.91	240.614	1.830734e+001	5.256182e+000	84	40	6.463487e+000	0	0	0	0	0	0	14.4462	1	0	57.259	40.12
DATA	756	9	76	0	0	A_64_P084976	NM_001008916	8641.58	240.573	4.989089e+000	4.967765e+000	70	41	8.535928e+000	0	0	0	0	0	0	-0.367643	0	0	57.5363	42.1724
DATA	757	9	77	0	0	A_64_P040004	XM_001054754	8667.17	240.464	4.470531e+003	4.470809e+002	3503	42	1.002976e+001	0	0	0	0	0	0	3485.3	1	1	47.2035	40.8966
DATA	758	9	78	0	0	A_64_P156785	XM_001058828	8692.5	241	5.025642e+000	5.004162e+000	67	40.5	8.679843e+000	0	0	0	0	0	0	-3.70108	0	0	54.1152	39.5556
DATA	759	9	79	0	0	A_64_P123914	XM_217505	8718.09	240.896	2.979650e+004	2.979654e+003	22884	42	7.537427e+000	0	0	0	0	0	0	23072.3	1	1	46.8651	40.7931
DATA	760	9	80	66	1	DarkCorner	DarkCorner	8743.8	241.303	5.057634e+000	5.036018e+000	55.5	41.5	7.956641e+000	0	0	0	0	0	0	-12.1385	0	0	45.4864	41.25
DATA	761	9	81	66	1	DarkCorner	DarkCorner	8769.54	240.951	5.072105e+000	5.050426e+000	59	39	8.860023e+000	0	0	0	0	0	0	-10.7777	0	0	43.7019	39.7143
DATA	762	9	82	66	1	DarkCorner	DarkCorner	8794	241	5.083941e+000	5.062212e+000	56	40	8.047707e+000	0	0	0	0	0	0	-11.6021	0	0	54.9904	41.0323
DATA	763	9	83	66	1	DarkCorner	DarkCorner	8819.72	241.259	5.094472e+000	5.072698e+000	59.5	39.5	9.248582e+000	0	0	0	0	0	0	-9.57007	0	0	42.9674	40.6316
DATA	764	9	84	66	1	DarkCorner	DarkCorner	8845.11	241.185	5.103462e+000	5.081649e+000	58	41	9.369515e+000	0	0	0	0	0	0	-11.2204	0	0	45.835	42.6341
DATA	765	9	85	66	1	DarkCorner	DarkCorner	8870.88	240.833	5.110992e+000	5.089147e+000	57	38	8.907881e+000	0	0	0	0	0	0	-11.6054	0	0	46.1809	37.9388
DATA	766	10	1	66	1	DarkCorner	DarkCorner	6749.89	247.07	4.446915e+000	4.427909e+000	60.5	42	7.870173e+000	0	0	0	0	0	0	-0.904844	0	0	46.8651	44.6531
DATA	767	10	2	66	1	DarkCorner	DarkCorner	6775.49	246.798	4.425799e+000	4.406882e+000	61	43.5	9.740008e+000	0	0	0	0	0	0	-0.636437	0	0	51.4001	45.7917
DATA	768	10	3	66	1	DarkCorner	DarkCorner	6800.5	247	4.405372e+000	4.386543e+000	60.5	48	1.049807e+001	0	0	0	0	0	0	-1.43093	0	0	54.1152	48.1304
DATA	769	10	4	66	1	DarkCorner	DarkCorner	6826.52	246.836	4.385075e+000	4.366737e+000	63	44.5	6.113023e+000	0	0	0	0	0	0	0.529046	0	0	47.8731	45.5357
DATA	770	10	5	66	1	DarkCorner	DarkCorner	6851.06	247.161	4.366209e+000	4.347548e+000	58	45	9.997979e+000	0	0	0	0	0	0	-4.58871	0	0	51.4001	45.14
DATA	771	10	6	66	1	DarkCorner	DarkCorner	6876.91	246.935	4.347463e+000	4.328882e+000	64	49	1.112787e+001	0	0	0	0	0	0	-0.786824	0	0	54.4085	46.7273
DATA	772	10	7	0	0	A_64_P139937	XM_001070013	6902.5	247	4.329424e+000	4.310920e+000	61	43	1.601206e+001	0	0	0	0	0	0	-3.59331	0	0	65	50.9474
DATA	773	10	8	0	0	A_44_P185613	XM_001080030	6927.5	247	7.333905e+001	8.498580e+000	131	43	1.804851e+001	0	0	0	0	0	0	66.4011	1	1	54.1152	49.9655
DATA	774	10	9	0	0	A_42_P738520	NM_001007746	6952.94	246.988	1.589565e+003	1.590140e+002	1486	45	1.027113e+001	0	0	0	1	0	0	1444.67	1	1	50.7771	46.6061
DATA	775	10	10	66	-1	(-)3xSLv1	NegativeControl	6978.31	247.5	4.280334e+000	4.262040e+000	60	43.5	9.778701e+000	0	0	0	0	0	0	-4.80459	0	0	42.2201	45.7941
DATA	776	10	11	0	0	A_42_P626023	NM_001107265	7003.56	247.028	7.208271e+002	7.220776e+001	713	43	8.911799e+000	0	0	0	0	0	0	659.768	1	1	48.2044	42.8571
DATA	777	10	12	0	0	A_43_P11120	XR_085824	7029.1	246.986	3.520133e+003	3.520388e+002	3267	47.5	1.105704e+001	0	0	0	0	0	0	3232.55	1	1	46.8651	46.75
DATA	778	10	13	0	0	A_42_P473425	NM_138844	7054.19	247.059	7.930209e+001	8.983543e+000	139	46	9.374559e+000	0	0	0	0	0	0	73.0463	1	1	46.5243	47
DATA	779	10	14	0	0	A_44_P692981	ENSRNOT00000007422	7080.17	247	6.926569e+001	8.104842e+000	129	44.5	9.483084e+000	0	0	0	0	0	0	63.99	1	1	46.8651	45.7368
DATA	780	10	15	0	0	A_64_P102366	A_64_P102366	7105.5	247	3.873953e+001	5.711727e+000	99	46	1.155771e+001	0	0	0	0	0	0	35.885	1	1	54.1152	47.2258
DATA	781	10	16	0	0	A_42_P616287	NM_001134555	7130.64	246.928	3.087133e+002	3.115395e+001	350	47	1.238911e+001	0	0	0	0	0	0	286.669	1	1	46.5243	47.36
DATA	782	10	17	0	0	A_64_P073995	XM_001081370	7155.75	247.381	3.086920e+001	5.194046e+000	91.5	45	8.468189e+000	0	0	0	0	0	0	28.7314	1	1	44.7812	45.9091
DATA	783	10	18	0	0	A_42_P595381	NM_001107258	7181.54	247.095	3.051780e+003	3.052064e+002	2867	42.5	8.514538e+000	0	0	0	0	0	0	2846.31	1	1	48.8603	42.8571
DATA	784	10	19	0	0	A_42_P462205	NM_001007745	7206.46	247.095	6.223857e+003	6.223996e+002	5585	46	1.347008e+001	0	0	0	0	0	0	5815.42	1	1	48.8603	48.5357
DATA	785	10	20	0	0	A_64_P016102	A_64_P016102	7232.5	247.352	5.576938e+001	6.953898e+000	115	46	1.120754e+001	0	0	0	0	0	0	52.199	1	1	57.5363	45.4375
DATA	786	10	21	0	0	A_64_P017829	NM_001128216	7257.58	247.427	1.021303e+001	4.271873e+000	73	46	7.093894e+000	0	0	0	0	0	0	9.57268	1	0	57.5363	46.36
DATA	787	10	22	0	0	A_64_P090244	NM_001127449	7283.42	247.427	1.731624e+005	1.731624e+004	162849	45	1.143493e+001	0	0	0	0	0	0	162503	1	1	57.5363	46.5152
DATA	788	10	23	0	0	A_42_P503626	NM_001044247	7308.74	247.072	6.181943e+001	7.439667e+000	127.5	42	8.961456e+000	0	0	0	0	0	0	58.0677	1	1	46.5243	42
DATA	789	10	24	0	0	A_64_P144850	ENSRNOT00000002335	7334	247.455	6.141449e+001	7.404233e+000	125	44	9.186991e+000	0	0	0	0	0	0	57.7328	1	1	55.8519	44.6154
DATA	790	10	25	0	0	A_42_P703023	NM_145776	7359.2	246.848	4.990531e+002	5.007624e+001	535.5	45	6.883084e+000	0	0	0	0	0	0	469.345	1	1	45.835	44.3448
DATA	791	10	26	0	0	A_64_P153581	NM_001109367	7384.58	247.427	6.604187e+001	7.790569e+000	129.5	43	7.169379e+000	0	0	0	0	0	0	62.1329	1	1	57.5363	43
DATA	792	10	27	0	0	A_44_P156782	NM_001013879	7409.94	247.232	1.447748e+003	1.448338e+002	1435.5	42.5	8.371076e+000	0	0	0	0	0	0	1362.12	1	1	46.5243	43.2143
DATA	793	10	28	0	0	A_43_P12841	NM_053535	7435.58	247.427	2.548980e+002	2.582269e+001	305.5	41	8.216327e+000	0	0	0	0	0	0	239.787	1	1	57.5363	41.6471
DATA	794	10	29	0	0	A_64_P097715	NM_001135710	7461	247.455	1.786686e+002	1.833900e+001	230	41	7.911799e+000	0	0	0	0	0	0	168.011	1	1	55.8519	40.1786
DATA	795	10	30	0	0	A_42_P769597	NM_001106230	7486	246.774	1.129405e+003	1.130163e+002	1159	40	8.072969e+000	0	0	0	0	0	0	1061.31	1	1	45.4864	41.5526
DATA	796	10	31	0	0	A_42_P561835	ENSRNOT00000043937	7511.64	247.13	2.702024e+002	2.733567e+001	325	40	7.805028e+000	0	0	0	0	0	0	253.705	1	1	46.8651	40.9615
DATA	797	10	32	0	0	A_42_P604399	NM_012941	7536.91	247.104	1.557653e+004	1.557658e+003	14460	46	1.461175e+001	0	0	0	0	0	0	14609.9	1	1	46.8651	48.3548
DATA	798	10	33	0	0	A_42_P744495	NM_017125	7562.11	247.5	5.684986e+003	5.685137e+002	5314	46	8.768269e+000	0	0	0	0	0	0	5325.61	1	1	47.8731	47.5556
DATA	799	10	34	0	0	A_64_P047391	A_64_P047391	7587.79	247.463	4.670488e+002	4.688948e+001	515	45	1.134257e+001	0	0	0	0	0	0	436.854	1	1	46.5243	46.75
DATA	800	10	35	0	0	A_44_P856007	NM_001108489	7612.99	247.557	3.112121e+002	3.139851e+001	358	42	1.274905e+001	0	0	0	0	0	0	290.596	1	1	47.8731	44.6471
DATA	801	10	36	0	0	A_64_P057562	ENSRNOT00000031129	7638.44	247.521	8.862012e+002	8.871826e+001	904	42	9.534328e+000	0	0	0	0	0	0	825.881	1	1	48.2044	40.8182
DATA	802	10	37	0	0	A_64_P102395	ENSRNOT00000029656	7664.11	247.5	1.877484e+002	1.923474e+001	241	47	1.176152e+001	0	0	0	0	0	0	174.587	1	1	56.9804	48.8
DATA	803	10	38	0	0	A_64_P132318	NM_133296	7689.23	247.288	2.446069e+003	2.446428e+002	2340	42	9.046597e+000	0	0	0	0	0	0	2269.22	1	1	45.4864	43.1818
DATA	805	10	40	0	0	A_64_P158848	NM_001130540	7740.42	247.573	1.965950e+003	1.966402e+002	1899	43	8.590129e+000	0	0	0	0	0	0	1814.08	1	1	57.5363	43.625
DATA	806	10	41	0	0	A_64_P302888	NM_001135015	7765.64	247.493	1.137540e+002	1.213499e+001	167	44.5	1.152591e+001	0	0	0	0	0	0	104.656	1	1	48.5334	45.4286
DATA	807	10	42	0	0	A_42_P604331	NM_001108533	7791.11	247.5	8.927334e+004	8.927335e+003	83124	48.5	1.528542e+001	0	0	0	0	0	0	81873.8	1	1	56.9804	50.0313
DATA	808	10	43	0	0	A_64_P166406	NM_019152	7816.39	247.74	8.081135e+002	8.092320e+001	779.5	46	1.080404e+001	0	0	0	0	0	0	738.691	1	1	50.1463	48
DATA	809	10	44	0	0	A_64_P123660	NM_001031655	7841.47	247.474	2.667359e+003	2.667700e+002	2353.5	47	1.065755e+001	0	0	0	0	0	0	2429.67	1	1	50.1463	45.8
DATA	810	10	45	0	0	A_42_P668800	NM_001127553	7867.16	247.254	1.464609e+003	1.465235e+002	1362.5	42	8.295938e+000	0	0	0	0	0	0	1329.09	1	1	45.835	41.625
DATA	811	10	46	0	0	A_64_P090458	NM_001109516	7892.85	247.446	5.950448e+000	4.341980e+000	74	43.5	9.516169e+000	0	0	0	0	0	0	5.37893	1	0	48.5334	43.8333
DATA	812	10	47	0	0	A_42_P635396	NM_001109506	7917.74	247.5	4.412528e+003	4.412740e+002	3970	45	7.108075e+000	0	0	0	0	0	0	3973.07	1	1	47.2035	45.5161
DATA	813	10	48	0	0	A_64_P002989	NM_031604	7943.42	247.573	8.539905e+004	8.539906e+003	74281.5	38.5	7.632775e+000	0	0	0	0	0	0	76571.1	1	1	57.5363	40.5
DATA	814	10	49	0	0	A_44_P914346	DV717012	7968.44	247.549	2.736840e+003	2.737186e+002	2438.5	43	7.021538e+000	0	0	0	0	0	0	2443.51	1	1	47.8731	43.0741
DATA	815	10	50	0	0	A_44_P791176	NM_001130577	7993.9	247.81	2.223059e+001	4.906466e+000	84.5	45	8.833333e+000	0	0	0	0	0	0	19.7603	1	1	45.835	45.9722
DATA	816	10	51	0	0	A_64_P011894	NM_001004210	8019.35	247.667	2.731904e+004	2.731908e+003	23914	47	1.225085e+001	0	0	0	0	0	0	24171.8	1	1	47.2035	46.2
DATA	817	10	52	0	0	A_42_P717654	XM_001063683	8044.61	247.784	6.022402e+003	6.022563e+002	5231.5	45	6.535994e+000	0	0	0	0	0	0	5303.88	1	1	49.1849	43.1724
DATA	818	10	53	0	0	A_64_P006102	NM_001100784	8070.24	247.543	5.540932e+002	5.558662e+001	554	42	9.593101e+000	0	0	0	0	0	0	485.609	1	1	47.2035	41.8
DATA	819	10	54	0	0	A_64_P116038	NM_001000335	8095.75	247.947	1.142977e+001	4.602051e+000	78	41	8.876815e+000	0	0	0	0	0	0	9.96846	1	0	42.9674	41.2581
DATA	820	10	55	0	0	A_42_P581567	NM_001011899	8121.42	247.573	2.505112e+002	2.544867e+001	289	41	6.233932e+000	0	0	0	0	0	0	217.372	1	1	57.5363	41.8095
DATA	821	10	56	0	0	A_42_P671206	FQ231880	8146.1	247.588	2.153714e+003	2.154185e+002	1894	47	9.322116e+000	0	0	0	1	0	0	1859.62	1	1	46.5243	47.7368
DATA	823	10	58	0	0	A_64_P078205	NM_001044255	8197.09	247.896	6.674873e+003	6.675028e+002	5674.5	49	8.089462e+000	0	0	0	0	0	0	5704.22	1	1	46.8651	48.4242
DATA	824	10	59	66	-1	(-)3xSLv1	NegativeControl	8222.5	248	4.592968e+000	4.573337e+000	59.5	47.5	8.933973e+000	0	0	0	0	0	0	-10.4739	0	0	54.1152	48.1111
DATA	825	10	60	0	0	A_44_P259051	NM_001037658	8248	248	1.623980e+003	1.624631e+002	1438	39.5	9.494081e+000	0	0	0	0	0	0	1373.3	1	1	46.8651	41.2857
DATA	826	10	61	0	0	A_64_P325262	A_64_P325262	8273.43	247.8	4.577404e+001	6.505184e+000	106	41	1.009706e+001	0	0	0	0	0	0	38.5023	1	1	45.4864	41.2813
DATA	827	10	62	0	0	A_64_P140005	NM_001191804	8298.68	247.85	3.005711e+001	5.534010e+000	95	42	7.179029e+000	0	0	0	0	0	0	25.1494	1	1	43.7019	42
DATA	828	10	63	0	0	A_42_P588606	NM_001134544	8324	248	2.686179e+002	2.726491e+001	293	42	8.046410e+000	0	0	0	0	0	0	223.58	1	1	46.8651	43.1786
DATA	829	10	64	0	0	A_42_P788541	NM_001106794	8349.7	247.827	7.273107e+003	7.273258e+002	6150	44	7.820986e+000	0	0	0	0	0	0	6021.2	1	1	49.8279	43.7333
DATA	830	10	65	0	0	A_44_P1050200	NM_001108000	8374.94	248.024	1.596609e+003	1.597307e+002	1375.5	40	5.586591e+000	0	0	0	0	0	0	1314.96	1	1	50.7771	38.28
DATA	831	10	66	0	0	A_42_P777935	ENSRNOT00000027369	8400.38	248	3.245416e+002	3.279925e+001	334	40	5.987262e+000	0	0	0	0	0	0	265.899	1	1	48.5334	39.2258
DATA	832	10	67	0	0	A_44_P349475	NM_031333	8425.69	248.014	2.668803e+003	2.669229e+002	2219	44	7.244319e+000	0	0	0	0	0	0	2175.39	1	1	47.2035	42.4643
DATA	833	10	68	0	0	A_64_P136188	XM_001059617	8451.5	248	2.173163e+002	2.225421e+001	246	44.5	1.028792e+001	0	0	0	0	0	0	176.228	1	1	54.1152	42.7143
DATA	834	10	69	0	0	A_64_P023386	NM_001106232	8476.84	247.897	4.232857e+004	4.232860e+003	35066	43	9.707400e+000	0	0	0	0	0	0	34154.7	1	1	46.5243	46.1852
DATA	835	10	70	0	0	A_64_P048576	NM_001000163	8502.22	247.953	4.804535e+001	6.821061e+000	105	41.5	1.003992e+001	0	0	0	0	0	0	38.5797	1	1	45.4864	41.6
DATA	836	10	71	1028	1	(+)E1A_r60_a20	E1A_r60_a20	8527.5	248.352	3.289362e+001	5.872166e+000	96	40	9.650712e+000	0	0	0	0	0	0	26.2905	1	1	65	42.6071
DATA	837	10	72	0	0	A_64_P078510	XM_001053102	8552.58	248.427	6.777973e+002	6.795565e+001	613	42	7.834206e+000	0	0	0	0	0	0	539.281	1	1	57.5363	43.9143
DATA	838	10	73	0	0	A_64_P101533	A_64_P101533	8578.67	248.073	4.930383e+000	4.909310e+000	57	39	6.594049e+000	0	0	0	0	0	0	-10.1308	0	0	50.4627	40.4074
DATA	839	10	74	0	0	A_64_P164601	ENSRNOT00000050537	8603.72	247.844	9.517773e+001	1.071896e+001	143	41	7.835670e+000	0	0	0	0	0	0	75.0544	1	1	45.4864	42.0909
DATA	840	10	75	0	0	A_42_P694928	NM_001109046	8629.09	248.116	3.187415e+002	3.225626e+001	319	43	7.821020e+000	0	0	0	1	0	0	250.338	1	1	46.8651	42.8438
DATA	841	10	76	0	0	A_42_P510565	ENSRNOT00000046259	8654.44	248.027	2.492783e+003	2.493278e+002	2000	45	8.183382e+000	0	0	0	0	0	0	1950.2	1	1	48.5334	44.75
DATA	842	10	77	0	0	A_64_P050877	XM_001081816	8679.58	248.427	1.642425e+001	5.250725e+000	81.5	39.5	1.021062e+001	0	0	0	0	0	0	12.8039	1	0	65	39.5294
DATA	843	10	78	0	0	A_44_P281352	NM_001013076	8705.45	248.164	7.242872e+002	7.260144e+001	625.5	45.5	6.852400e+000	0	0	0	0	0	0	562.64	1	1	48.2044	44.6538
DATA	844	10	79	0	0	A_44_P269675	ENSRNOT00000031839	8730.54	248.167	1.542555e+003	1.543372e+002	1250	42	7.584815e+000	0	0	0	0	0	0	1194.56	1	1	47.8731	42
DATA	845	10	80	66	1	DarkCorner	DarkCorner	8756	248.455	5.056302e+000	5.034691e+000	59	39	8.443040e+000	0	0	0	0	0	0	-12.0791	0	0	55.8519	39.617
DATA	846	10	81	66	1	DarkCorner	DarkCorner	8782.27	248.348	5.069856e+000	5.048187e+000	62	39	9.573686e+000	0	0	0	0	0	0	-7.37129	0	0	46.1809	39.8571
DATA	847	10	82	66	1	DarkCorner	DarkCorner	8806.69	248.351	5.080795e+000	5.059079e+000	56	39.5	8.747743e+000	0	0	0	0	0	0	-11.2092	0	0	48.5334	39.6389
DATA	848	10	83	66	1	DarkCorner	DarkCorner	8832.33	248.5	5.090394e+000	5.068638e+000	61	45	1.009546e+001	0	0	0	0	0	0	-7.20135	0	0	57.5363	45.5806
DATA	849	10	84	66	1	DarkCorner	DarkCorner	8857.51	248.75	5.097866e+000	5.076077e+000	59	38	7.507335e+000	0	0	0	0	0	0	-10.7656	0	0	46.5243	38.9412
DATA	850	10	85	66	1	DarkCorner	DarkCorner	8882.63	248.827	5.103610e+000	5.081797e+000	61	35.5	7.817405e+000	0	0	0	0	0	0	-8.94422	0	0	49.5074	35.9103
DATA	851	11	1	66	1	DarkCorner	DarkCorner	6737.27	253.975	4.451684e+000	4.432657e+000	62	40	8.448787e+000	0	0	0	0	0	0	-0.0241795	0	0	49.1849	40.3147
DATA	852	11	2	66	1	DarkCorner	DarkCorner	6762.33	254.114	4.430585e+000	4.418108e+000	64	42	8.318002e+000	0	0	0	0	0	0	2.1048	0	0	46.8651	42.3214
DATA	853	11	3	66	1	DarkCorner	DarkCorner	6787.84	253.915	4.409967e+000	4.391259e+000	63	46	1.127600e+001	0	0	0	0	0	0	0.310619	0	0	50.1463	46.9259
DATA	854	11	4	66	1	DarkCorner	DarkCorner	6813.5	254.352	4.389345e+000	4.370585e+000	58	45	9.061047e+000	0	0	0	0	0	0	-4.12692	0	0	57.5363	46.8889
DATA	855	11	5	66	1	DarkCorner	DarkCorner	6837.22	253.878	4.371546e+000	4.352883e+000	65	41	7.496211e+000	0	0	0	0	0	0	0.121059	0	0	36.1258	42.4545
DATA	856	11	6	66	1	DarkCorner	DarkCorner	6864.42	254.427	4.351033e+000	4.332437e+000	58	42	1.072615e+001	0	0	0	0	0	0	-5.18737	0	0	57.5363	43.7045
DATA	857	11	7	0	0	A_64_P077381	A_64_P077381	6889.6	254.171	2.049833e+001	4.776955e+000	83.5	43	9.326214e+000	0	0	0	0	0	0	18.4703	1	0	47.2035	45.25
DATA	858	11	8	0	0	A_64_P085926	NM_030860	6914.72	254.16	1.400181e+003	1.400841e+002	1293	44	1.479504e+001	0	0	0	0	0	0	1266.66	1	1	49.1849	49.32
DATA	859	11	9	0	0	A_42_P598560	NM_001033693	6940.17	254.3	1.784298e+003	1.784811e+002	1640	42	1.045067e+001	0	0	0	0	0	0	1620.43	1	1	47.2035	44.7037
DATA	860	11	10	0	1	ETG08_142674	ETG08_142674	6965.58	254.427	1.192654e+001	4.428846e+000	74.5	42	8.083544e+000	0	0	0	0	0	0	10.8715	1	0	65	43.3667
DATA	861	11	11	0	0	A_42_P724142	NM_001106340	6990.93	254.417	1.387443e+003	1.388094e+002	1332.5	45	8.267178e+000	0	0	0	0	0	0	1269.15	1	1	48.2044	44.2903
DATA	862	11	12	0	0	A_64_P054193	NM_001014193	7016.58	254.427	4.807293e+004	4.807295e+003	43518	47	9.475680e+000	0	0	0	0	0	0	44122.6	1	1	57.5363	46.9333
DATA	863	11	13	0	0	A_42_P750554	NM_001107846	7041.75	253.812	2.374231e+003	2.374606e+002	2188	45	1.040833e+001	0	0	0	0	0	0	2185.76	1	1	46.1809	44.5
DATA	864	11	14	0	0	A_44_P285547	NM_053393	7067.21	254.284	1.547370e+002	1.603629e+001	208	45.5	8.112167e+000	0	0	0	0	0	0	142.887	1	1	45.835	46.2368
DATA	865	11	15	0	0	A_42_P623374	NM_138845	7092.58	254.427	2.680042e+003	2.680370e+002	2494.5	44.5	9.033844e+000	0	0	0	1	0	0	2481.71	1	1	57.5363	44.9
DATA	866	11	16	0	0	A_64_P064888	NM_001127303	7117.87	254.229	3.225668e+002	3.252742e+001	356.5	46	1.201102e+001	0	0	0	0	0	0	299.454	1	1	46.5243	47.7692
DATA	867	11	17	0	0	A_44_P522406	NM_001001103	7143.38	254.323	4.119644e+001	5.867457e+000	102	45	8.928483e+000	0	0	0	0	0	0	38.3362	1	1	45.4864	45.9697
DATA	868	11	18	0	0	A_42_P660129	NM_130422	7168.89	254.5	1.285002e+002	1.350934e+001	186.5	42	8.316327e+000	0	0	0	0	0	0	119.841	1	1	56.9804	43
DATA	869	11	19	0	0	A_64_P035679	A_64_P035679	7194.42	254.427	5.605016e+004	5.605017e+003	52244.5	43	7.652719e+000	0	0	0	0	0	0	52375.1	1	1	57.5363	42.4444
DATA	870	11	20	0	0	A_64_P118862	NM_001191999	7219.58	254.427	8.834356e+001	9.762075e+000	147.5	44.5	1.200573e+001	0	0	0	0	0	0	82.693	1	1	65	45.2857
DATA	871	11	21	0	0	A_42_P638181	NM_133395	7244.93	254.268	1.548911e+004	1.548917e+003	14694	45	1.055849e+001	0	0	0	0	0	0	14520.1	1	1	47.5395	44.6333
DATA	872	11	22	0	0	A_44_P423803	NM_031144	7270.36	254.402	3.320259e+004	3.320261e+003	31447	46	7.807696e+000	0	0	0	0	0	0	31166.4	1	1	52.3208	45.037
DATA	874	11	24	0	0	A_44_P445195	NM_133300	7321.06	254.389	2.535454e+003	2.535791e+002	2411	41	7.467577e+000	0	0	0	0	0	0	2384.55	1	1	48.2044	42
DATA	875	11	25	0	0	A_42_P563276	NM_013093	7346.68	254.348	1.228543e+002	1.296148e+001	181	45	7.287786e+000	0	0	0	0	0	0	115.615	1	1	45.835	43.3871
DATA	876	11	26	0	0	A_42_P535608	NM_001107160	7371.88	254.585	2.728382e+002	2.759457e+001	325.5	45	7.803018e+000	0	0	0	0	0	0	256.87	1	1	44.7812	43.875
DATA	877	11	27	0	0	A_44_P233080	ENSRNOT00000026303	7397.15	254.836	1.419651e+004	1.419657e+003	13198.5	42	9.093400e+000	0	0	0	0	0	0	13368.3	1	1	47.5395	43.0233
DATA	878	11	28	0	0	A_43_P13320	NM_138880	7422.1	254.955	1.717844e+001	4.472018e+000	84	42	7.488931e+000	0	0	0	0	0	0	16.1757	1	0	46.8651	41.8378
DATA	879	11	29	0	0	A_42_P548007	NM_001135020	7448.13	253.762	1.216575e+004	1.216582e+003	11584.5	41	7.398507e+000	0	0	0	0	0	0	11450.8	1	1	45.1352	41.1875
DATA	880	11	30	0	0	A_44_P282853	NM_031983	7473.28	254.353	3.921837e+003	3.922055e+002	3665	40	8.094024e+000	0	0	0	0	0	0	3689.77	1	1	46.1809	41.5714
DATA	881	11	31	0	0	A_42_P552341	NM_053519	7498.75	254.553	1.214918e+003	1.215622e+002	1194	40	8.110527e+000	0	0	0	0	0	0	1142.22	1	1	49.5074	40.7742
DATA	882	11	32	0	0	A_64_P031476	NM_001107172	7524.32	254.439	2.369379e+002	2.405266e+001	290	41	9.416603e+000	0	0	0	0	0	0	222.542	1	1	45.835	41.3793
DATA	883	11	33	0	0	A_42_P620762	NM_024403	7549.7	254.9	1.357746e+004	1.357752e+003	12816	46.5	1.288102e+001	0	0	0	0	0	0	12738.2	1	1	47.2035	48.9286
DATA	884	11	34	0	0	A_64_P135370	A_64_P135370	7574.91	254.896	5.431508e+002	5.447338e+001	586	44	8.951655e+000	0	0	0	0	0	0	508.867	1	1	46.8651	44.9189
DATA	885	11	35	0	0	A_42_P576202	NM_001108583	7600.17	255	1.126684e+003	1.127451e+002	1078	47	1.264619e+001	0	0	0	0	0	0	1053.88	1	1	46.8651	48.7941
DATA	886	11	36	0	0	A_64_P022879	NM_001109019	7626	254.545	5.345420e+001	6.776155e+000	119	40.5	8.645284e+000	0	0	0	0	0	0	49.9045	1	1	55.8519	41.0313
DATA	887	11	37	0	0	A_42_P711589	NM_022948	7651.24	254.471	6.239938e+003	6.240077e+002	5910.5	45.5	9.316220e+000	0	0	0	1	0	0	5813.66	1	1	47.2035	44.3667
DATA	888	11	38	0	0	A_64_P007244	A_64_P007244	7676.64	254.87	7.125744e+003	7.125866e+002	6805	44	1.178197e+001	0	0	0	0	0	0	6624.28	1	1	46.8651	46.7407
DATA	889	11	39	0	0	A_42_P477625	NM_001108719	7702	254.729	4.145631e+003	4.145843e+002	3858	42	7.153750e+000	0	0	0	0	0	0	3844.36	1	1	46.8651	43.6364
DATA	890	11	40	0	0	A_64_P153091	XM_341223	7727.5	254.648	9.454677e+002	9.464018e+001	927.5	43	7.165257e+000	0	0	0	0	0	0	874.407	1	1	57.5363	43.8182
DATA	891	11	41	0	0	A_64_P016347	NM_130819	7752.91	254.614	4.234048e+000	4.215952e+000	66	42.5	9.422126e+000	0	0	0	0	0	0	-1.44868	0	0	57.259	43.9643
DATA	892	11	42	0	0	A_42_P495598	NM_001014026	7778.5	255	7.398854e+000	4.292995e+000	72.5	45	1.299971e+001	0	0	0	0	0	0	6.8025	1	0	54.1152	46.2973
DATA	893	11	43	0	0	A_42_P759043	NM_001134509	7803.5	255	9.339553e+002	9.349183e+001	889.5	45	1.136926e+001	0	0	0	0	0	0	855.943	1	1	54.1152	45.48
DATA	894	11	44	0	0	A_64_P071595	XM_002728361	7829.39	254.931	1.025854e+001	4.378989e+000	76	47.5	1.069861e+001	0	0	0	0	0	0	9.36883	1	0	65	46.3571
DATA	895	11	45	0	0	A_42_P780882	NM_001008511	7854.29	254.754	7.892833e+003	7.892948e+002	7255	43	8.428537e+000	0	0	0	0	0	0	7182.76	1	1	45.1352	43.8333
DATA	896	11	46	0	0	A_64_P044420	NM_001134983	7879.66	254.956	1.544716e+002	1.603134e+001	207.5	42	1.035793e+001	0	0	0	0	0	0	140.051	1	1	45.835	44.1351
DATA	897	11	47	0	0	A_64_P000596	NM_001025732	7905.17	255	3.053872e+003	3.054176e+002	2858	44	7.674143e+000	0	0	0	0	0	0	2757.89	1	1	46.8651	45.6774
DATA	898	11	48	0	0	A_44_P468873	ENSRNOT00000015693	7930.5	255	7.123202e+001	8.332225e+000	130	44	9.371742e+000	0	0	0	0	0	0	64.067	1	1	54.1152	45.7273
DATA	900	11	50	0	0	A_42_P727022	NM_001107076	7981.3	255.029	1.475579e+004	1.475585e+003	13361	43	7.461364e+000	0	0	0	0	0	0	13158	1	1	46.1809	42.6829
DATA	901	11	51	0	0	A_64_P135604	NM_001009641	8006.87	255	3.206696e+003	3.206995e+002	2961	47.5	1.189011e+001	0	0	0	0	0	0	2846.54	1	1	48.5334	48.7333
DATA	902	11	52	0	0	A_42_P813939	NM_001108741	8032.24	255	3.729886e+003	3.730146e+002	3440	42	1.091616e+001	0	0	0	0	0	0	3295.72	1	1	46.8651	44.6552
DATA	903	11	53	0	0	A_64_P052494	A_64_P052494	8057.5	255	1.416772e+001	4.642318e+000	82	42	9.523370e+000	0	0	0	0	0	0	12.4598	1	0	54.1152	42.1379
DATA	904	11	54	0	0	A_44_P323678	NM_001107651	8083.09	255.065	1.991629e+001	4.868420e+000	87	40	9.960266e+000	0	0	0	0	0	0	17.4304	1	0	65	41.2759
DATA	905	11	55	0	0	A_44_P435764	NM_001191810	8108.94	255.079	7.645402e+000	4.529724e+000	75	40	6.589511e+000	0	0	0	0	0	0	6.65765	1	0	45.4864	41.037
DATA	906	11	56	0	0	A_42_P688320	NM_001108569	8133.63	255.404	3.486909e+002	3.515652e+001	366.5	45.5	8.111329e+000	0	0	0	0	0	0	302.179	1	1	57.8122	45.6429
DATA	907	11	57	0	0	A_42_P798500	NM_001014023	8159.12	254.956	1.110987e+003	1.111902e+002	993.5	48	1.275657e+001	0	0	0	1	0	0	957.829	1	1	46.8651	49.8205
DATA	908	11	58	0	0	A_44_P279083	NM_133401	8184.7	255.1	1.237291e+003	1.238121e+002	1144.5	49	1.168311e+001	0	0	0	0	0	0	1061.23	1	1	47.2035	46.931
DATA	909	11	59	0	0	A_64_P129850	NM_001002855	8210	255.455	2.539266e+001	5.216043e+000	87	48	7.078920e+000	0	0	0	0	0	0	21.668	1	1	55.8519	47.9444
DATA	910	11	60	0	0	A_64_P029468	NM_001105784	8235.5	255.352	2.569176e+001	5.251671e+000	90.5	42.5	8.759166e+000	0	0	0	0	0	0	21.8079	1	1	57.5363	43.6333
DATA	911	11	61	0	0	A_43_P18571	NM_001013965	8260.8	254.859	3.685734e+002	3.714387e+001	372.5	41	1.003086e+001	0	0	0	0	0	0	311.195	1	1	45.4864	41.7586
DATA	912	11	62	0	1	ERCC-00104_60	ERCC-00104_60	8286.42	255.427	2.292099e+001	5.165342e+000	85	40.5	9.201814e+000	0	0	0	0	0	0	19.2517	1	0	57.5363	40.8125
DATA	913	11	63	0	0	A_44_P653701	NM_001106536	8311.57	255.059	1.453375e+002	1.526056e+001	189	41	5.363013e+000	0	0	0	0	0	0	121.427	1	1	46.5243	40.4762
DATA	914	11	64	0	0	A_64_P093593	NM_001107077	8336.71	255.121	5.624098e+002	5.643518e+001	548	44	6.967595e+000	0	0	0	0	0	0	467.444	1	1	45.835	44.0313
DATA	915	11	65	0	0	A_44_P1034793	NM_001008300	8362.21	255.125	1.070861e+003	1.071893e+002	949	41	8.212832e+000	0	0	0	0	0	0	885.366	1	1	47.5395	43.0313
DATA	916	11	66	0	0	A_42_P768355	NM_057130	8387.69	255.338	7.982399e+002	7.996382e+001	738	40	6.900596e+000	0	0	0	0	0	0	656.555	1	1	48.5334	38.7586
DATA	917	11	67	0	0	A_44_P714581	NM_001107480	8412.89	255.352	5.874534e+003	5.874726e+002	4892	41.5	7.744173e+000	0	0	0	0	0	0	4807.19	1	1	47.8731	40.75
DATA	918	11	68	0	0	A_64_P084521	NM_019351	8438.51	255.119	7.349343e+003	7.349498e+002	6116	44	9.028144e+000	0	0	0	0	0	0	5983.02	1	1	46.1809	42.6897
DATA	919	11	69	0	0	A_42_P562625	NM_131913	8464.06	254.825	2.576301e+003	2.576749e+002	2178.5	46.5	9.767860e+000	0	0	0	0	0	0	2086.69	1	1	45.4864	45.3158
DATA	920	11	70	0	0	A_42_P468662	NM_001108886	8489.27	255.155	2.158559e+003	2.159097e+002	1782	41	7.990483e+000	0	0	0	0	0	0	1739.96	1	1	47.5395	40.25
DATA	921	11	71	0	0	A_42_P778587	NM_001135767	8514.58	255.427	3.079500e+002	3.117398e+001	315	43	9.984224e+000	0	0	0	1	0	0	247.061	1	1	57.5363	43.4483
DATA	922	11	72	0	0	A_64_P139957	NM_001008525	8540	255.343	1.700064e+004	1.700071e+003	13765	41	1.247090e+001	0	0	0	0	0	0	13575.5	1	1	45.4864	43.76
DATA	923	11	73	0	0	A_44_P318402	NM_001000187	8565.77	255.348	1.231380e+002	1.324966e+001	164	41	1.043894e+001	0	0	0	0	0	0	97.8802	1	1	46.8651	43.6667
DATA	924	11	74	0	0	A_64_P090359	NM_001033565	8591.25	255.841	1.293938e+001	5.079636e+000	78	39	6.542334e+000	0	0	0	0	0	0	10.2415	1	0	46.1809	40.4706
DATA	925	11	75	0	0	A_43_P17778	NM_001134991	8616.42	255.427	3.146086e+001	5.850683e+000	92	41.5	9.154486e+000	0	0	0	0	0	0	24.7966	1	1	57.5363	42.2692
DATA	926	11	76	0	0	A_64_P093176	A_64_P093176	8641.67	255.5	4.698425e+001	6.826412e+000	106	47	8.932242e+000	0	0	0	0	0	0	36.8865	1	1	57.5363	45.5806
DATA	927	11	77	0	0	A_64_P100123	NM_182821	8667.15	255.296	6.246485e+003	6.246683e+002	4892	42	1.256289e+001	0	0	0	0	0	0	4885.35	1	1	47.5395	42.8529
DATA	928	11	78	0	0	A_44_P426660	NM_001135717	8692.79	255.618	1.369772e+001	5.173123e+000	78.5	42	8.035551e+000	0	0	0	0	0	0	10.6757	1	0	46.5243	41.4848
DATA	929	11	79	0	0	A_42_P696084	NM_031022	8718	255.5	3.172464e+003	3.172859e+002	2514	43	5.178302e+000	0	0	0	0	0	0	2464.5	1	1	44.4243	43.2593
DATA	930	11	80	66	1	DarkCorner	DarkCorner	8743.26	256.6	5.040002e+000	5.018461e+000	57	38.5	7.748272e+000	0	0	0	0	0	0	-12.891	0	0	44.4243	39.9643
DATA	931	11	81	66	1	DarkCorner	DarkCorner	8768.58	255.573	5.054748e+000	5.033144e+000	57	41.5	9.041220e+000	0	0	0	0	0	0	-12.3711	0	0	57.5363	40.4773
DATA	932	11	82	66	1	DarkCorner	DarkCorner	8793.55	255.549	5.066669e+000	5.045013e+000	57	40	8.718762e+000	0	0	0	0	0	0	-11.4323	0	0	47.8731	42.4286
DATA	933	11	83	66	1	DarkCorner	DarkCorner	8819.69	256.086	5.076764e+000	5.055066e+000	63	40	8.866121e+000	0	0	0	0	0	0	-7.23852	0	0	43.3362	41.0541
DATA	934	11	84	66	1	DarkCorner	DarkCorner	8844.29	255.982	5.085266e+000	5.063531e+000	58	38	8.460475e+000	0	0	0	0	0	0	-9.47073	0	0	41.4593	40.0313
DATA	935	11	85	66	1	DarkCorner	DarkCorner	8870.42	255.573	5.092722e+000	5.070955e+000	60	39	7.899275e+000	0	0	0	0	0	0	-8.24034	0	0	57.5363	39.8478
DATA	936	12	1	66	1	DarkCorner	DarkCorner	6749.89	261.5	4.434688e+000	4.415734e+000	62	42	1.000564e+001	0	0	0	0	0	0	-0.52209	0	0	56.9804	43.7
DATA	937	12	2	66	1	DarkCorner	DarkCorner	6775.48	260.952	4.414217e+000	4.395350e+000	62.5	39.5	1.080289e+001	0	0	0	0	0	0	-0.111487	0	0	43.7019	42.0357
DATA	938	12	3	66	1	DarkCorner	DarkCorner	6800.82	260.679	4.394290e+000	4.375508e+000	60	41.5	9.760957e+000	0	0	0	0	0	0	-1.8386	0	0	42.2201	43.425
DATA	939	12	4	66	1	DarkCorner	DarkCorner	6826.11	261.5	4.374169e+000	4.355473e+000	61	42	5.560034e+000	0	0	0	0	0	0	-2.39676	0	0	56.9804	43.7742
DATA	940	12	5	66	1	DarkCorner	DarkCorner	6850.93	261.65	4.355568e+000	4.340013e+000	64	43	9.451691e+000	0	0	0	0	0	0	1.46101	0	0	50.1463	43.6346
DATA	941	12	6	0	0	A_64_P118227	XM_002728056	6876.89	261.5	3.515448e+001	5.568454e+000	94.5	44	1.079298e+001	0	0	0	0	0	0	31.6494	1	1	56.9804	43.7647
DATA	942	12	7	0	0	A_64_P051317	NM_130425	6902.32	261.449	1.182041e+002	1.257860e+001	168.5	45	8.712129e+000	0	0	0	0	0	0	106.85	1	1	46.8651	45.087
DATA	943	12	8	0	0	A_42_P756350	NM_021772	6927.58	261.573	1.850674e+002	1.899617e+001	234.5	44.5	1.012149e+001	0	0	0	1	0	0	167.945	1	1	57.5363	46.7308
DATA	944	12	9	0	0	A_42_P816479	NM_022278	6952.69	261.405	1.383511e+004	1.383518e+003	12303	43	1.061032e+001	0	0	0	0	0	0	12601.3	1	1	48.5334	44.6897
DATA	945	12	10	0	0	A_64_P351634	NM_001029901	6978.42	261.573	3.443297e+002	3.469464e+001	374	43	8.728603e+000	0	0	0	0	0	0	314.767	1	1	57.5363	43.8667
DATA	946	12	11	0	0	A_64_P136597	A_64_P136597	7003.85	261.983	5.921817e+002	5.936965e+001	599.5	45	9.280356e+000	0	0	0	0	0	0	543.218	1	1	44.7812	43.4375
DATA	947	12	12	0	0	A_64_P052017	ENSRNOT00000033592	7029.42	261.573	2.368865e+001	4.843676e+000	85.5	46	9.434872e+000	0	0	0	0	0	0	21.7993	1	1	65	47.4286
DATA	948	12	13	0	0	A_44_P444485	TC589779	7054.17	261.157	3.043795e+003	3.044087e+002	2735	44	7.897461e+000	0	0	0	0	0	0	2809.17	1	1	46.8651	44.6452
DATA	949	12	14	0	0	A_44_P147373	XM_226249	7079.57	261.392	2.700780e+003	2.701107e+002	2478.5	45	7.557819e+000	0	0	0	0	0	0	2499.79	1	1	49.1849	44.2778
DATA	950	12	15	0	0	A_64_P059939	NM_001134540	7105.5	261.648	3.678033e+004	3.678036e+003	33171	43	7.228965e+000	0	0	0	0	0	0	34136.6	1	1	57.5363	43.9643
DATA	951	12	16	0	0	A_42_P637279	NM_012743	7130.36	261.189	2.266644e+001	4.754322e+000	86	47	9.108947e+000	0	0	0	0	0	0	21.0865	1	1	49.1849	46.5172
DATA	952	12	17	0	0	A_42_P771570	XM_001080365	7156.04	261.566	5.314458e+002	5.330789e+001	560	42	8.265981e+000	0	0	0	0	0	0	495.551	1	1	49.1849	41.8667
DATA	953	12	18	0	0	A_43_P12942	NM_053817	7181.31	261.662	1.035906e+004	1.035915e+003	9630	43	1.118390e+001	0	0	0	0	0	0	9679.15	1	1	48.5334	45.2903
DATA	954	12	19	0	0	A_64_P053307	NM_001191900	7207	261.545	2.982010e+001	5.113029e+000	92	43	1.081595e+001	0	0	0	0	0	0	27.914	1	1	55.8519	44.8788
DATA	955	12	20	0	0	A_42_P595630	NM_001013189	7232.09	261.896	6.919839e+003	6.919963e+002	6569	45	9.865548e+000	0	0	0	0	0	0	6488.14	1	1	46.8651	43.9355
DATA	956	12	21	0	0	A_64_P154760	A_64_P154760	7257.64	261.742	5.159592e+002	5.176182e+001	550	46	5.353553e+000	0	0	0	0	0	0	484.442	1	1	46.1809	46.85
DATA	957	12	22	0	0	A_42_P764359	NM_145086	7282.93	261.8	3.488431e+003	3.488676e+002	3232.5	45	1.129569e+001	0	0	0	0	0	0	3279.21	1	1	46.8651	43.8519
DATA	958	12	23	0	0	A_43_P10405	NM_001109257	7308.26	261.738	6.446336e+001	7.656971e+000	128.5	45	1.125206e+001	0	0	0	0	0	0	60.6544	1	1	45.1352	45.6875
DATA	959	12	24	0	0	A_44_P269950	ENSRNOT00000014054	7334	262	5.518247e+001	6.891929e+000	117	42.5	5.429831e+000	0	0	0	0	0	0	51.962	1	1	65	43.1765
DATA	960	12	25	0	0	A_44_P160763	NM_001106513	7359.22	261.919	2.570026e+002	2.602949e+001	304	46	7.977956e+000	0	0	0	0	0	0	242.123	1	1	47.8731	44.8276
DATA	961	12	26	0	0	A_64_P127678	NM_001008553	7384.56	262.028	9.661690e+002	9.670495e+001	974	44	8.458790e+000	0	0	0	0	0	0	910.499	1	1	48.2044	44.3636
DATA	962	12	27	0	0	A_42_P684885	NM_133517	7410.63	261.808	5.879895e+000	4.167200e+000	72	43	9.950349e+000	0	0	0	0	0	0	5.54126	1	0	48.2044	43.7949
DATA	963	12	28	0	0	A_64_P102708	NM_001034149	7435.5	262	3.186881e+001	5.213548e+000	93	42	7.314499e+000	0	0	0	0	0	0	30.029	1	1	54.1152	42.2424
DATA	964	12	29	0	0	A_42_P547629	NM_001106718	7460.76	261.716	7.829172e+002	7.840046e+001	809.5	42	6.627963e+000	0	0	0	0	0	0	737.404	1	1	45.835	42.3214
DATA	965	12	30	0	0	A_42_P522285	NM_001044263	7486	261.797	9.015322e+002	9.024779e+001	899	38	7.002401e+000	0	0	0	0	0	0	848.608	1	1	46.8651	39.7143
DATA	966	12	31	0	0	A_64_P164423	NM_057193	7511.39	261.852	4.241741e+001	5.922927e+000	106	41.5	5.106666e+000	0	0	0	0	0	0	39.8939	1	1	43.7019	41.6786
DATA	967	12	32	0	0	A_44_P256143	NM_001047917	7537.09	262.065	1.927036e+002	1.970969e+001	244.5	41	1.022698e+001	0	0	0	0	0	0	181.048	1	1	54.4085	42.6552
DATA	968	12	33	0	0	A_44_P727294	NM_001160314	7562	262.203	3.883006e+003	3.883227e+002	3603	44.5	1.031107e+001	0	0	0	0	0	0	3643.59	1	1	46.8651	44.5
DATA	969	12	34	0	0	A_64_P108404	NM_001000092	7587.91	262.065	6.441844e+001	7.662792e+000	127	50	1.251726e+001	0	0	0	0	0	0	60.3528	1	1	54.4085	50.5
DATA	970	12	35	0	0	A_44_P520829	NM_001108777	7613.31	262.041	1.129314e+003	1.130079e+002	1107	44.5	1.189808e+001	0	0	0	0	0	0	1056.21	1	1	48.8603	46.0833
DATA	971	12	36	0	0	A_44_P229677	NM_001014221	7638.14	262.127	1.656479e+003	1.657003e+002	1644	43	1.096974e+001	0	0	0	0	0	0	1546.34	1	1	46.8651	43.9091
DATA	972	12	37	0	0	A_64_P126215	A_64_P126215	7664.09	262.386	1.546365e+001	4.451111e+000	80	46	1.000769e+001	0	0	0	0	0	0	14.4042	1	0	57.259	46.6667
DATA	973	12	38	0	0	A_64_P090035	A_64_P090035	7689.44	262.027	1.211878e+004	1.211885e+003	11009	42	9.958304e+000	0	0	0	0	0	0	11261.5	1	1	48.5334	44.9333
DATA	974	12	39	0	0	A_64_P089330	ENSRNOT00000012374	7714.58	261.8	2.179841e+002	2.219831e+001	270	46.5	7.615426e+000	0	0	0	0	0	0	202.047	1	1	42.9674	45.9286
DATA	975	12	40	0	0	A_44_P454429	NM_012712	7740.13	261.855	1.516448e+002	1.573701e+001	208	40	6.963378e+000	0	0	0	0	0	0	140.17	1	1	45.4864	41.6364
DATA	976	12	41	0	1	ERCC-00144_60	ERCC-00144_60	7764.86	262.107	1.910891e+001	4.630809e+000	86	43	1.124023e+001	0	0	0	0	0	0	17.6128	1	0	42.2201	42.9697
DATA	977	12	42	0	0	A_42_P759843	XR_086347	7791	262.261	2.530247e+003	2.530600e+002	2400	45	1.297470e+001	0	0	0	0	0	0	2324.68	1	1	52.9257	46.697
DATA	978	12	43	0	0	A_43_P14264	NM_053653	7816.35	262.419	7.729832e+002	7.741483e+001	757.5	49	1.082034e+001	0	0	0	0	0	0	707.845	1	1	48.5334	47.1852
DATA	979	12	44	0	0	A_64_P011223	NM_024353	7841.58	262.427	2.931194e+002	2.961995e+001	347	47	9.772749e+000	0	0	0	0	0	0	267.488	1	1	57.5363	46.6071
DATA	980	12	45	0	0	A_42_P701169	NM_001109572	7867.42	262.427	2.102662e+003	2.103097e+002	1988	42	8.982742e+000	0	0	0	1	0	0	1911.65	1	1	57.5363	43.7586
DATA	981	12	46	0	0	A_64_P143307	NM_001014106	7892.58	262.427	9.438246e+002	9.448003e+001	929	44	1.071852e+001	0	0	0	0	0	0	854.829	1	1	57.5363	44.6207
DATA	982	12	47	0	0	A_44_P480636	NM_001005381	7917.86	262.208	4.266644e+002	4.288357e+001	457	45	8.213548e+000	0	0	0	0	0	0	384.89	1	1	47.5395	46.0645
DATA	983	12	48	0	0	A_64_P163564	ENSRNOT00000010609	7943.42	262.427	7.208574e+001	8.407918e+000	131	41	9.692715e+000	0	0	0	0	0	0	64.7593	1	1	57.5363	43.1111
DATA	984	12	49	0	0	A_42_P774028	NM_001017447	7968.34	262.329	3.520122e+003	3.520390e+002	3238.5	43	7.322110e+000	0	0	0	0	0	0	3149.05	1	1	48.8603	42.5517
DATA	985	12	50	0	0	A_43_P20110	ENSRNOT00000050558	7994.33	262.5	3.683685e+001	5.712122e+000	101	43	9.945443e+000	0	0	0	0	0	0	32.8059	1	1	57.5363	45.3871
DATA	986	12	51	0	0	A_44_P552865	NM_001170399	8019.5	262.5	1.398335e+003	1.399023e+002	1312.5	52	1.184204e+001	0	0	0	0	0	0	1239.72	1	1	57.5363	51.9231
DATA	987	12	52	0	0	A_43_P17428	NM_001012189	8044.89	262.5	4.895014e+002	4.914801e+001	503.5	42	6.927670e+000	0	0	0	0	0	0	431.96	1	1	56.9804	43.2759
DATA	988	12	53	0	0	A_64_P146222	TC633165	8070.35	262.205	2.269432e+004	2.269436e+003	20231	41	8.711487e+000	0	0	0	0	0	0	19930.3	1	1	51.0895	39.84
DATA	989	12	54	0	0	A_64_P054856	NM_001135894	8095.61	262.141	5.515611e+002	5.533522e+001	555	41	8.279002e+000	0	0	0	0	0	0	482.042	1	1	47.5395	42.5517
DATA	990	12	55	0	0	A_64_P154982	ENSRNOT00000018118	8120.94	262.232	1.338612e+004	1.338620e+003	11608	39.5	8.143797e+000	0	0	0	0	0	0	11641.4	1	1	46.5243	40.8929
DATA	991	12	56	0	0	A_42_P726363	NM_031536	8146.42	262.493	2.074504e+001	4.948851e+000	87	46	1.035082e+001	0	0	0	0	0	0	17.951	1	0	47.2035	46.5143
DATA	992	12	57	0	0	A_64_P139685	A_64_P139685	8171.89	262.5	2.189586e+001	5.018897e+000	88	48	1.315500e+001	0	0	0	0	0	0	18.8502	1	0	56.9804	48.4444
DATA	993	12	58	0	0	A_64_P114104	NM_001034136	8197.13	262.5	6.019110e+003	6.019281e+002	5005.5	47.5	8.753743e+000	0	0	0	0	0	0	5155.4	1	1	49.8279	47.7813
DATA	994	12	59	0	0	A_42_P480273	A_42_P480273	8222.69	262.52	6.478889e+003	6.479050e+002	5388	46	8.596167e+000	0	0	0	0	0	0	5520.26	1	1	49.1849	45.5862
DATA	995	12	60	0	0	A_64_P004344	ENSRNOT00000047696	8248.11	262.5	9.771321e+003	9.771429e+002	8364.5	41	8.212690e+000	0	0	0	0	0	0	8282.02	1	1	47.8731	42
DATA	996	12	61	0	0	A_42_P723584	NM_001109099	8273.18	262.361	5.850085e+003	5.850267e+002	4883	40.5	8.642485e+000	0	0	0	1	0	0	4932.69	1	1	47.8731	41.2188
DATA	997	12	62	0	0	A_64_P114813	A_64_P114813	8298.89	262.5	4.655411e+000	4.635513e+000	64.5	40.5	6.980893e+000	0	0	0	0	0	0	-3.68569	0	0	56.9804	40.0938
DATA	998	12	63	0	0	A_64_P034551	NM_053818	8324.42	262.573	1.818288e+002	1.877053e+001	218	42	6.136503e+000	0	0	0	0	0	0	151.703	1	1	57.5363	42.36
DATA	999	12	64	0	0	A_42_P492976	NM_001126099	8349.44	262.493	7.852397e+002	7.866356e+001	709	41	7.176865e+000	0	0	0	0	0	0	651.758	1	1	47.2035	42.6897
DATA	1000	12	65	0	0	A_64_P141799	NM_001025709	8374.69	262.52	1.048718e+003	1.049775e+002	925	43	6.200111e+000	0	0	0	0	0	0	865.959	1	1	49.1849	43.2
DATA	1001	12	66	0	0	A_44_P337088	NM_133609	8400.36	262.316	7.696614e+002	7.711155e+001	709	39	8.330903e+000	0	0	0	0	0	0	632.206	1	1	49.1849	38.7586
DATA	1002	12	67	0	0	A_64_P137961	A_64_P137961	8425.58	262.573	8.339986e+001	9.601293e+000	139	44	8.294577e+000	0	0	0	0	0	0	68.1624	1	1	57.5363	42.4
DATA	1003	12	68	0	0	A_64_P053822	ENSRNOT00000028268	8451.11	262.857	7.524895e+001	8.915199e+000	132.5	46	7.440260e+000	0	0	0	0	0	0	61.1942	1	1	45.4864	44.2333
DATA	1004	12	69	0	0	A_42_P484456	NM_001106601	8476.58	262.573	3.621483e+003	3.621802e+002	3013	45	8.545971e+000	0	0	0	0	0	0	2930.39	1	1	57.5363	45.2857
DATA	1005	12	70	0	0	A_44_P508632	NM_001107594	8502	262.545	4.848837e+000	4.841391e+000	71.5	42	9.059789e+000	0	0	0	0	0	0	2.88548	0	0	55.8519	41.1852
DATA	1006	12	71	0	0	A_64_P080598	NM_001047865	8527.5	262.648	3.701885e+001	6.102037e+000	98	42	1.000950e+001	0	0	0	0	0	0	29.6702	1	1	57.5363	42.24
DATA	1007	12	72	0	0	A_64_P144243	A_64_P144243	8552.58	262.573	2.706174e+001	5.573876e+000	91.5	42	7.425824e+000	0	0	0	0	0	0	21.5918	1	1	57.5363	43
DATA	1008	12	73	0	0	A_44_P479917	NM_030864	8578.33	262.537	3.023735e+001	5.753370e+000	94	39	6.699018e+000	0	0	0	0	0	0	24.0178	1	1	46.5243	40.6552
DATA	1009	12	74	0	0	A_44_P974524	NM_001025764	8603.92	262.815	4.138121e+001	6.425340e+000	103	41	8.315724e+000	0	0	0	0	0	0	32.7313	1	1	45.835	41.2857
DATA	1010	12	75	0	0	A_42_P522899	NM_021578	8629.09	262.896	1.639799e+002	1.712450e+001	198.5	46.5	8.899982e+000	0	0	0	0	0	0	129.186	1	1	46.8651	45.375
DATA	1011	12	76	0	0	A_64_P069892	NM_019201	8654.31	262.986	3.937422e+004	3.937426e+003	30598	43.5	9.857986e+000	0	0	0	0	0	0	30902.3	1	1	47.2035	43.9286
DATA	1012	12	77	0	0	A_44_P415199	NM_001108748	8679.5	263	3.708209e+001	6.202197e+000	94	42	8.169258e+000	0	0	0	0	0	0	28.9993	1	1	54.1152	41.5667
DATA	1013	12	78	0	0	A_64_P034610	NM_022622	8705.58	263	1.708169e+002	1.779528e+001	199.5	45	7.514089e+000	0	0	0	0	0	0	133.123	1	1	47.8731	43.6923
DATA	1014	12	79	0	0	A_42_P473828	ENSRNOT00000035309	8730.75	263	3.272160e+003	3.272543e+002	2596	41	6.328158e+000	0	0	0	1	0	0	2542.27	1	1	49.1849	41.7407
DATA	1015	12	80	66	1	DarkCorner	DarkCorner	8756	263	5.039737e+000	5.018196e+000	57	38.5	7.947163e+000	0	0	0	0	0	0	-10.5562	0	0	54.9904	39.25
DATA	1016	12	81	66	1	DarkCorner	DarkCorner	8782.13	263.304	5.052443e+000	5.030848e+000	56	43	9.403295e+000	0	0	0	0	0	0	-12.4999	0	0	46.1809	42.3171
DATA	1017	12	82	66	1	DarkCorner	DarkCorner	8806.6	263.181	5.063272e+000	5.041631e+000	53	39	8.517950e+000	0	0	0	0	0	0	-12.7259	0	0	47.8731	40.6579
DATA	1018	12	83	66	1	DarkCorner	DarkCorner	8832.75	263.097	5.073033e+000	5.051350e+000	56	38	8.459286e+000	0	0	0	0	0	0	-12.2371	0	0	47.8731	39.1786
DATA	1019	12	84	66	1	DarkCorner	DarkCorner	8858.23	263.033	5.080658e+000	5.058943e+000	52	38	1.055799e+001	0	0	0	0	0	0	-14.9903	0	0	44.4243	40.625
DATA	1020	12	85	66	1	DarkCorner	DarkCorner	8883.23	263.145	5.086017e+000	5.064280e+000	61	36	7.758275e+000	0	0	0	0	0	0	-7.0916	0	0	44.7812	36.4579
DATA	1021	13	1	66	1	DarkCorner	DarkCorner	6737.16	268.84	4.439037e+000	4.420064e+000	60	38	8.198838e+000	0	0	0	0	0	0	-1.33211	0	0	48.2044	38.9566
DATA	1022	13	2	66	1	DarkCorner	DarkCorner	6762.06	268.486	4.418906e+000	4.400019e+000	59	42	1.388592e+001	0	0	0	0	0	0	-1.72496	0	0	48.5334	46.3214
DATA	1023	13	3	66	1	DarkCorner	DarkCorner	6787.58	268.325	4.398641e+000	4.379841e+000	61	42	9.927860e+000	0	0	0	0	0	0	-1.22005	0	0	57.8122	43.4906
DATA	1024	13	4	66	1	DarkCorner	DarkCorner	6813.3	268.651	4.378436e+000	4.359722e+000	57	42	8.767432e+000	0	0	0	0	0	0	-5.62028	0	0	52.0157	44.4865
DATA	1025	13	5	66	1	DarkCorner	DarkCorner	6838.11	268.301	4.360067e+000	4.341432e+000	57	42.5	6.615761e+000	0	0	0	0	0	0	-5.5043	0	0	51.0895	44.5
DATA	1026	13	6	0	0	A_64_P029912	NM_001109143	6864.04	268.757	2.161957e+002	2.204742e+001	255	40	8.616800e+000	0	0	0	0	0	0	194.465	1	1	48.5334	39.973
DATA	1027	13	7	0	0	A_42_P574731	NM_012948	6889.56	268.973	4.080268e+003	4.080495e+002	3648	43.5	8.248136e+000	0	0	0	0	0	0	3685.4	1	1	48.5334	44.4286
DATA	1028	13	8	0	0	A_44_P137448	NM_017043	6914.7	268.9	6.476521e+002	6.490699e+001	639	43.5	9.169795e+000	0	0	0	1	0	0	587.258	1	1	47.2035	44.4583
DATA	1029	13	9	0	0	A_42_P770614	NM_001013235	6940.5	269	4.555611e+004	4.555613e+003	41324.5	45	9.235259e+000	0	0	0	1	0	0	41468	1	1	54.1152	46.04
DATA	1030	13	10	0	0	A_42_P785419	NM_199501	6965.33	269.014	3.143552e+002	3.172233e+001	354.5	43.5	7.895958e+000	0	0	0	0	0	0	287.163	1	1	48.5334	43.8846
DATA	1031	13	11	0	0	A_42_P581043	TC622715	6990.72	269.095	9.545887e+003	9.545981e+002	8629	47	1.024998e+001	0	0	0	0	0	0	8750.5	1	1	48.8603	44.8
DATA	1032	13	12	0	0	A_64_P098532	NM_001029928	7016.53	268.531	2.286086e+001	4.806036e+000	85	45.5	8.173312e+000	0	0	0	0	0	0	21.0245	1	1	45.1352	45.5
DATA	1033	13	13	0	0	A_64_P090758	A_64_P090758	7042.15	268.893	1.483474e+003	1.484073e+002	1452.5	43	8.742739e+000	0	0	0	0	0	0	1368.66	1	1	50.1463	44.375
DATA	1034	13	14	0	0	A_43_P12079	NM_021583	7067.5	269	1.007348e+002	1.091466e+001	161	44.5	5.056543e+000	0	0	0	0	0	0	93.2107	1	1	54.1152	44.6471
DATA	1035	13	15	0	0	A_64_P001947	A_64_P001947	7092.68	268.933	2.544936e+001	4.902707e+000	89	42	5.230826e+000	0	0	0	0	0	0	23.612	1	1	43.7019	42.8077
DATA	1036	13	16	0	0	A_64_P064461	A_64_P064461	7118.39	269.069	5.994080e+001	7.307427e+000	120	46.5	8.048774e+000	0	0	0	0	0	0	55.757	1	1	53.8203	46.1
DATA	1037	13	17	0	0	A_42_P575398	NM_020538	7144	268.93	4.501141e+000	4.194153e+000	70	42	8.591751e+000	0	0	0	0	0	0	4.19673	1	0	46.8651	42.5455
DATA	1038	13	18	0	0	A_42_P482623	NM_199463	7168.75	269	2.285657e+003	2.286036e+002	2235	40.5	8.809531e+000	0	0	0	0	0	0	2135.51	1	1	49.1849	40.7059
DATA	1039	13	19	0	0	A_42_P738431	NM_019175	7193.93	269.214	2.325842e+003	2.326213e+002	2165	43	9.723962e+000	0	0	0	0	0	0	2177.25	1	1	46.8651	43.3438
DATA	1040	13	20	0	0	A_44_P1027780	ENSRNOT00000065815	7219.4	269.082	4.697672e+001	6.265711e+000	108.5	42	9.191862e+000	0	0	0	0	0	0	44.0503	1	1	48.5334	42.9032
DATA	1041	13	21	0	0	A_42_P479802	NM_053679	7245.07	268.582	1.836094e+003	1.836561e+002	1787.5	45	9.591663e+000	0	0	0	0	0	0	1724.21	1	1	45.835	42.3333
DATA	1042	13	22	0	0	A_44_P496624	NM_022302	7270.36	268.682	1.204196e+002	1.273209e+001	179	44	9.226221e+000	0	0	0	0	0	0	113.227	1	1	45.835	42.1379
DATA	1043	13	23	0	0	A_42_P700753	FQ212883	7295.7	269.1	2.503749e+003	2.504089e+002	2435	43	8.499608e+000	0	0	0	0	0	0	2356.79	1	1	47.2035	42.08
DATA	1044	13	24	0	0	A_44_P229299	NM_001100678	7320.97	269.061	7.592798e+002	7.604005e+001	789	43	8.212500e+000	0	0	0	0	0	0	715.305	1	1	46.8651	43.3871
DATA	1045	13	25	0	0	A_42_P728472	NM_001007600	7346.5	269	2.050152e+004	2.050156e+003	19357	44	7.125110e+000	0	0	0	0	0	0	19325.9	1	1	48.5334	44.2143
DATA	1046	13	26	0	0	A_42_P488904	NM_001108947	7371.74	269.222	1.302818e+004	1.302825e+003	12052	43	7.047931e+000	0	0	0	0	0	0	12286.2	1	1	47.5395	42.56
DATA	1047	13	27	0	0	A_42_P458494	NM_001034951	7396.96	269.6	1.545652e+002	1.599668e+001	209	45	1.020933e+001	0	0	0	0	0	0	145.792	1	1	47.8731	45.2326
DATA	1048	13	28	0	0	A_64_P100331	ENSRNOT00000048614	7422.53	269.485	2.078153e+001	4.616384e+000	86	41	8.853795e+000	0	0	0	0	0	0	19.6006	1	1	46.5243	41.3056
DATA	1049	13	29	0	0	A_64_P113989	NM_181631	7448.02	268.662	1.329956e+004	1.329963e+003	12625	41	7.341897e+000	0	0	0	0	0	0	12539	1	1	45.4864	42.4
DATA	1050	13	30	0	0	A_64_P042105	ENSRNOT00000061599	7473.47	268.891	6.480158e+001	7.682065e+000	126	40	7.681060e+000	0	0	0	0	0	0	61.0662	1	1	44.0646	41.0357
DATA	1051	13	31	0	0	A_64_P044435	NM_001015020	7498.75	268.812	9.521860e+002	9.530807e+001	974	39.5	6.729134e+000	0	0	0	0	0	0	896.636	1	1	46.1809	39.5938
DATA	1052	13	32	0	0	A_64_P149011	NM_031352	7524.28	269.16	4.043487e+003	4.043698e+002	3818	41.5	8.370710e+000	0	0	0	0	0	0	3804.08	1	1	49.1849	42.0714
DATA	1053	13	33	0	0	A_42_P580844	NM_019296	7549.5	269	3.120925e+002	3.148232e+001	359.5	38	9.775480e+000	0	0	0	0	0	0	293.266	1	1	48.5334	41.68
DATA	1054	13	34	0	0	A_64_P052972	A_64_P052972	7575.33	269.5	2.515413e+002	2.549306e+001	305	47	1.151699e+001	0	0	0	0	0	0	236.045	1	1	57.5363	46.9375
DATA	1055	13	35	0	0	A_44_P454300	NM_001003979	7600.29	269.926	4.167345e+000	4.149605e+000	68	46.5	1.061749e+001	0	0	0	0	0	0	0.228758	0	0	45.835	47.4
DATA	1056	13	36	0	0	A_44_P149743	ENSRNOT00000005476	7626	269.455	2.945697e+001	5.095233e+000	96	39	7.503156e+000	0	0	0	0	0	0	27.5473	1	1	55.8519	40.2121
DATA	1057	13	37	0	0	A_42_P841017	NM_173309	7651.23	268.727	7.480953e+003	7.481069e+002	6985	46	8.198304e+000	0	0	0	0	0	0	6981.24	1	1	45.4864	45.2927
DATA	1058	13	38	0	0	A_44_P206844	NM_013074	7676.59	269.4	1.585393e+002	1.639450e+001	215.5	45	9.497731e+000	0	0	0	0	0	0	147.629	1	1	49.5074	45.7241
DATA	1059	13	39	0	0	A_64_P073400	NM_001000705	7702.19	269.243	1.902430e+002	1.947931e+001	245	46	8.942619e+000	0	0	0	0	0	0	176.711	1	1	48.5334	47.5517
DATA	1060	13	40	0	0	A_64_P066676	A_64_P066676	7727.5	269.5	2.670893e+001	4.974441e+000	89	42	9.198177e+000	0	0	0	0	0	0	24.7444	1	1	57.5363	43.8387
DATA	1061	13	41	0	0	A_44_P386965	NM_001134594	7753.11	269.137	1.294746e+001	4.403481e+000	81	42.5	9.102898e+000	0	0	0	0	0	0	11.9602	1	0	46.8651	43.5294
DATA	1062	13	42	0	0	A_64_P095895	NM_019338	7778.42	269.573	1.505324e+002	1.563394e+001	208	44	1.090700e+001	0	0	0	0	0	0	138.641	1	1	57.5363	44.3529
DATA	1063	13	43	1028	1	(+)E1A_r60_a22	E1A_r60_a22	7803.71	269.325	2.113615e+002	2.155626e+001	256	46	9.560283e+000	0	0	0	0	0	0	194.036	1	1	49.8279	45.5517
DATA	1064	13	44	0	0	A_42_P541625	NM_001126090	7828.93	269.507	2.738925e+004	2.738929e+003	24712	47	9.790105e+000	0	0	0	1	0	0	25059.9	1	1	48.5334	46.6667
DATA	1065	13	45	0	0	A_64_P033895	NM_001126084	7854.28	268.896	2.078341e+002	2.121647e+001	261	41.5	9.089552e+000	0	0	0	0	0	0	189.468	1	1	45.835	43.6563
DATA	1066	13	46	0	0	A_64_P012546	NM_022300	7879.89	269.5	9.521020e+004	9.521021e+003	86802.5	47	9.811887e+000	0	0	0	0	0	0	86476.2	1	1	56.9804	47.8387
DATA	1067	13	47	0	0	A_42_P495598	NM_001014026	7905.42	269.573	4.315810e+000	4.298957e+000	68	44	1.018775e+001	0	0	0	0	0	0	1.05886	0	0	57.5363	47.375
DATA	1068	13	48	0	0	A_42_P483463	NM_001130999	7930.57	269.347	3.967888e+003	3.968122e+002	3596.5	46	9.670497e+000	0	0	0	0	0	0	3575.34	1	1	48.2044	46.5
DATA	1069	13	49	0	0	A_42_P575104	NM_153737	7955.81	269.467	1.881842e+004	1.881847e+003	16229	42	1.211358e+001	0	0	0	0	0	0	16886.4	1	1	49.5074	44.8966
DATA	1070	13	50	0	0	A_42_P461726	NM_133549	7981.68	269.654	3.409592e+001	5.528442e+000	97	42.5	8.916956e+000	0	0	0	0	0	0	30.4613	1	1	50.7771	43.3125
DATA	1071	13	51	0	0	A_64_P098688	A_64_P098688	8006.58	269.573	1.002846e+005	1.002846e+004	88057.5	53	1.455531e+001	0	0	0	0	0	0	89201.8	1	1	57.5363	53
DATA	1072	13	52	0	0	A_64_P105797	A_64_P105797	8032.02	269.571	4.473473e+001	6.268461e+000	108.5	41	8.242421e+000	0	0	0	0	0	0	39.6086	1	1	44.0646	43
DATA	1073	13	53	0	0	A_42_P545943	NM_019291	8057.61	269.271	1.157798e+004	1.157806e+003	10027	41	9.076260e+000	0	0	0	0	0	0	10202.4	1	1	47.5395	42.6129
DATA	1074	13	54	0	0	A_44_P520045	NM_001001371	8083	269.545	1.453305e+002	1.519416e+001	200.5	41	5.980535e+000	0	0	0	0	0	0	127.456	1	1	55.8519	42.3043
DATA	1075	13	55	0	0	A_44_P306964	NM_001012184	8108.36	269.552	1.153031e+002	1.236098e+001	169	38.5	7.816124e+000	0	0	0	0	0	0	100.629	1	1	46.1809	39.3824
DATA	1076	13	56	0	0	A_44_P156043	NM_001039012	8133.45	269.697	2.327762e+003	2.328192e+002	2105	45	8.390562e+000	0	0	0	0	0	0	2021.59	1	1	46.1809	45.1923
DATA	1077	13	57	0	0	A_64_P054686	TC585752	8159.18	269.639	2.826433e+004	2.826437e+003	24791	47	1.288284e+001	0	0	0	0	0	0	24421.4	1	1	47.8731	48.0769
DATA	1078	13	58	0	0	A_42_P575104	NM_153737	8184.42	269.878	1.828449e+004	1.828455e+003	15114.5	44	1.287589e+001	0	0	0	1	0	0	15719	1	1	48.5334	45.9333
DATA	1079	13	59	0	0	A_64_P142194	NM_053426	8209.94	269.7	3.448904e+003	3.449203e+002	2992	46	8.652277e+000	0	0	0	0	0	0	2949.58	1	1	46.8651	47.0938
DATA	1080	13	60	0	0	A_64_P043314	A_64_P043314	8235.5	270	7.516204e+001	8.796334e+000	129	42	7.423329e+000	0	0	0	0	0	0	63.9481	1	1	54.1152	42.9286
DATA	1081	13	61	0	0	A_44_P684315	NM_001109104	8260.59	269.851	3.596767e+004	3.596770e+003	29636.5	38	6.398698e+000	0	0	0	0	0	0	30443.2	1	1	48.5334	39.12
DATA	1082	13	62	0	0	A_64_P142620	NM_201417	8285.99	269.903	9.453928e+001	1.052132e+001	150	41	9.188823e+000	0	0	0	0	0	0	79.6013	1	1	46.8651	41.2188
DATA	1083	13	63	0	0	A_42_P568419	NM_001011894	8311.48	269.916	3.581529e+003	3.581830e+002	3090.5	43	6.765928e+000	0	0	0	0	0	0	2999.81	1	1	49.8279	42
DATA	1084	13	64	0	0	A_42_P519868	NM_053906	8336.85	269.924	3.093170e+002	3.128167e+001	326	42	8.128130e+000	0	0	0	0	0	0	257.729	1	1	46.1809	42.931
DATA	1085	13	65	0	0	A_43_P12346	NM_022943	8362.09	269.896	2.724769e+002	2.764844e+001	297	44	6.324954e+000	0	0	0	0	0	0	225.862	1	1	46.8651	44.7714
DATA	1087	13	67	0	0	A_44_P556989	NM_012610	8413.5	270	5.880388e+001	7.552434e+000	115	42	1.053350e+001	0	0	0	0	0	0	48.2408	1	1	54.1152	43.2727
DATA	1088	13	68	0	0	A_64_P113079	XM_218149	8438.44	270.286	4.782929e+000	4.762487e+000	66	45	6.430651e+000	0	0	0	0	0	0	-1.22048	0	0	44.4243	45.2593
DATA	1089	13	69	0	0	A_64_P003937	NM_173111	8463.93	269.8	8.178289e+003	8.178429e+002	6861	46	7.806268e+000	0	0	0	0	0	0	6642.74	1	1	46.8651	45.0571
DATA	1090	13	70	0	0	A_42_P771337	NM_001012015	8489.51	269.826	1.064917e+002	1.168511e+001	154	43	8.627675e+000	0	0	0	0	0	0	86.0754	1	1	47.2035	42.6667
DATA	1091	13	71	0	0	A_44_P401035	A_44_P401035	8514.78	269.892	5.031895e+001	6.976803e+000	110	43	1.119842e+001	0	0	0	0	0	0	40.481	1	1	45.835	42.7308
DATA	1092	13	72	0	0	A_42_P536292	NM_033359	8539.91	269.896	8.275194e+002	8.289423e+001	728.5	42	1.190826e+001	0	0	0	0	0	0	662.699	1	1	46.8651	45.16
DATA	1093	13	73	0	0	A_44_P128564	NM_001109121	8565.5	270	3.222297e+002	3.258990e+001	327.5	40	6.965352e+000	0	0	0	0	0	0	256.897	1	1	65	40.75
DATA	1094	13	74	0	0	A_64_P069957	NM_173315	8590.91	270.065	4.918650e+000	4.906145e+000	71	39.5	8.435189e+000	0	0	0	0	0	0	2.29403	0	0	54.4085	41.3824
DATA	1095	13	75	0	0	A_44_P538691	NM_031772	8616.33	270.273	1.260431e+002	1.352967e+001	166	45	1.021929e+001	0	0	0	0	0	0	99.6503	1	1	49.8279	43.7143
DATA	1096	13	76	0	0	A_44_P499231	NM_001034148	8641.44	270.26	7.969980e+002	7.985255e+001	689	42	1.063767e+001	0	0	0	0	0	0	627.67	1	1	49.5074	44.92
DATA	1097	13	77	0	0	A_64_P121489	XM_001065883	8667.09	270.386	6.776500e+000	5.001251e+000	75	45	1.044876e+001	0	0	0	0	0	0	5.31701	1	0	65	44.48
DATA	1098	13	78	0	0	A_42_P507072	FQ213070	8692.56	270.027	5.414752e+003	5.414980e+002	4240	42	7.920533e+000	0	0	0	0	0	0	4233.47	1	1	48.5334	42.2121
DATA	1099	13	79	0	0	A_64_P120075	ENSRNOT00000027841	8717.97	270.104	3.270449e+002	3.308279e+001	329	42	6.454456e+000	0	0	0	0	0	0	254.88	1	1	46.8651	42.08
DATA	1100	13	80	0	0	A_44_P1007362	NM_138864	8743.42	270.427	3.680483e+002	3.714332e+001	357	38	4.454448e+000	0	0	0	0	0	0	286.013	1	1	57.5363	38.7895
DATA	1101	13	81	66	1	DarkCorner	DarkCorner	8768.58	270.427	5.037738e+000	5.016207e+000	59.5	43.5	9.590822e+000	0	0	0	0	0	0	-10.5902	0	0	57.5363	43.375
DATA	1102	13	82	66	1	DarkCorner	DarkCorner	8794	270.455	5.049502e+000	5.027920e+000	56.5	41	7.511063e+000	0	0	0	0	0	0	-12.9679	0	0	55.8519	42.5526
DATA	1103	13	83	66	1	DarkCorner	DarkCorner	8819.79	270.588	5.059620e+000	5.037995e+000	58	39	7.341249e+000	0	0	0	0	0	0	-9.39037	0	0	46.5243	39.5
DATA	1104	13	84	66	1	DarkCorner	DarkCorner	8844.58	270.427	5.067965e+000	5.046305e+000	58	38	9.168664e+000	0	0	0	0	0	0	-9.44392	0	0	57.5363	40.2424
DATA	1105	13	85	66	1	DarkCorner	DarkCorner	8870.21	270.339	5.074617e+000	5.052928e+000	56	36	6.845853e+000	0	0	0	0	0	0	-11.0563	0	0	44.4243	36.6087
DATA	1106	14	1	66	1	DarkCorner	DarkCorner	6749.44	276.187	4.422766e+000	4.404754e+000	63.5	42	9.252736e+000	0	0	0	0	0	0	0.782168	0	0	49.1849	44.4222
DATA	1107	14	2	66	1	DarkCorner	DarkCorner	6774.38	276.297	4.402677e+000	4.384486e+000	61	39.5	9.966432e+000	0	0	0	0	0	0	0.657222	0	0	52.9257	41.9412
DATA	1108	14	3	66	1	DarkCorner	DarkCorner	6800.58	276.427	4.382159e+000	4.363429e+000	61	42	9.486767e+000	0	0	0	0	0	0	-1.274	0	0	57.5363	44.2982
DATA	1109	14	4	66	1	DarkCorner	DarkCorner	6826.17	276.409	4.362846e+000	4.344199e+000	56.5	45	7.171730e+000	0	0	0	0	0	0	-5.29806	0	0	54.4085	45.3939
DATA	1110	14	5	66	1	DarkCorner	DarkCorner	6851.5	276.352	4.344386e+000	4.325817e+000	61	46	7.138404e+000	0	0	0	0	0	0	-3.33726	0	0	65	45.7442
DATA	1111	14	6	0	0	A_64_P151415	NM_001191684	6876.83	276.16	4.686731e+002	4.706490e+001	486	44.5	8.586784e+000	0	0	0	0	0	0	422.954	1	1	48.2044	43.4063
DATA	1112	14	7	0	0	A_42_P475623	NM_053394	6902	276.271	1.525617e+003	1.526221e+002	1399	44.5	8.424598e+000	0	0	0	0	0	0	1382.27	1	1	46.8651	45.4231
DATA	1113	14	8	0	0	A_44_P123636	ENSRNOT00000023689	6927.58	276.427	7.624539e+000	4.341912e+000	70	45	8.604401e+000	0	0	0	0	0	0	6.93507	1	0	65	46.0357
DATA	1114	14	9	0	0	A_64_P135207	ENSRNOT00000043866	6952.63	276.309	4.810570e+002	4.829387e+001	495	47	7.818141e+000	0	0	0	0	0	0	439.14	1	1	46.5243	46.04
DATA	1115	14	10	0	0	A_42_P516693	NM_001107330	6978.42	276.427	1.310976e+001	4.441638e+000	73	46	1.029741e+001	0	0	0	0	0	0	12.0105	1	0	65	45.3548
DATA	1116	14	11	0	0	A_64_P125447	NM_001109231	7003.52	276.221	1.362467e+002	1.426616e+001	188	43	9.212920e+000	0	0	0	0	0	0	125.232	1	1	49.8279	44.0294
DATA	1117	14	12	0	0	A_42_P701756	NM_001107646	7028.95	276.534	4.285422e+003	4.285630e+002	4022	45	7.590375e+000	0	0	0	0	0	0	3951.69	1	1	48.5334	45.1842
DATA	1118	14	13	0	0	A_44_P344181	NM_017204	7054.38	276	6.076091e+002	6.090617e+001	623	44	9.860415e+000	0	0	0	0	0	0	561.93	1	1	48.5334	46.5278
DATA	1119	14	14	0	0	A_64_P035330	ENSRNOT00000066415	7080.06	276.051	6.096234e+002	6.110630e+001	633	42	4.680842e+000	0	0	0	0	0	0	565.398	1	1	49.1849	41.3438
DATA	1120	14	15	0	0	A_42_P837533	NM_001134546	7105.06	275.825	7.027543e+003	7.027667e+002	6618	46	1.052524e+001	0	0	0	0	0	0	6534.31	1	1	45.4864	45.3529
DATA	1121	14	16	0	0	A_42_P744291	NM_001025729	7130.48	276.147	2.145972e+003	2.146378e+002	2058	47.5	1.005770e+001	0	0	0	0	0	0	2000.27	1	1	49.8279	46.0625
DATA	1122	14	17	0	0	A_44_P149267	NM_001013099	7156.33	276.5	3.209950e+001	5.255685e+000	95	42	8.377786e+000	0	0	0	0	0	0	29.9889	1	1	57.5363	41.6111
DATA	1123	14	18	0	0	A_64_P002546	NM_144741	7181.5	276.5	4.171109e+000	4.155534e+000	64.5	43	7.808042e+000	0	0	0	0	0	0	1.28063	0	0	57.5363	43.4138
DATA	1124	14	19	0	0	A_42_P808236	NM_001107189	7206.77	276.667	8.375519e+001	9.345413e+000	144	43	9.715070e+000	0	0	0	0	0	0	78.5458	1	1	47.2035	44.4848
DATA	1125	14	20	0	0	A_44_P425848	NM_001108747	7232.12	276.397	1.047342e+003	1.048160e+002	1058	40	9.032508e+000	0	0	0	0	0	0	983.725	1	1	48.5334	42
DATA	1126	14	21	0	0	A_43_P17405	TC612613	7257.48	276.192	2.487889e+002	2.521997e+001	301	45	8.985291e+000	0	0	0	0	0	0	233.992	1	1	47.8731	43.0714
DATA	1127	14	22	0	0	A_64_P022402	NM_001142304	7283.33	276.5	1.254016e+001	4.315008e+000	76.5	44	9.437856e+000	0	0	0	0	0	0	11.8086	1	0	57.5363	42.8387
DATA	1128	14	23	0	0	A_44_P1019726	ENSRNOT00000025138	7308.51	276.408	1.928571e+002	1.972192e+001	250	45	1.007505e+001	0	0	0	0	0	0	181.773	1	1	47.8731	46.3929
DATA	1129	14	24	0	0	A_44_P128186	NM_053305	7333.89	276.5	1.890732e+002	1.935142e+001	248	43	7.935899e+000	0	0	0	0	0	0	178.336	1	1	56.9804	43.3871
DATA	1130	14	25	0	0	A_44_P203665	NM_001105725	7359.42	276.573	2.615601e+002	2.647850e+001	322.5	42.5	7.294528e+000	0	0	0	0	0	0	246.83	1	1	57.5363	43.0833
DATA	1131	14	26	0	0	A_42_P688802	DV723748	7384.45	276.622	5.615158e+003	5.615309e+002	5207	43.5	9.319954e+000	0	0	0	0	0	0	5300.36	1	1	49.1849	46.3077
DATA	1132	14	27	0	0	A_64_P129943	NM_001105712	7409.88	276.603	9.402429e+002	9.411445e+001	955	47	7.908935e+000	0	0	0	0	0	0	887.572	1	1	48.5334	47.4857
DATA	1133	14	28	0	0	A_64_P017577	NM_001106982	7435.5	276.5	3.091392e+001	5.150372e+000	93	42	8.479263e+000	0	0	0	0	0	0	29.1766	1	1	57.5363	43.1351
DATA	1134	14	29	0	0	A_44_P235926	NM_024138	7460.89	276.5	4.916391e+002	4.933633e+001	541.5	41	6.740170e+000	0	0	0	0	0	0	463.823	1	1	56.9804	41.8667
DATA	1135	14	30	0	0	A_42_P611638	NM_001034137	7486.06	276.389	1.550797e+003	1.551345e+002	1514	40	7.328248e+000	0	0	0	1	0	0	1462.13	1	1	48.2044	41.6452
DATA	1136	14	31	0	0	A_42_P654878	NM_001107919	7511.57	276.608	2.572079e+003	2.572410e+002	2474	42.5	6.564737e+000	0	0	0	0	0	0	2423.03	1	1	49.1849	41.5313
DATA	1137	14	32	0	0	A_64_P017464	NM_001135687	7537.14	276.593	7.800134e+000	4.204514e+000	75	38	8.312452e+000	0	0	0	0	0	0	7.3402	1	0	56.9804	40.4074
DATA	1138	14	33	0	0	A_64_P152873	NM_001207022	7562.5	276.648	7.114539e+001	8.229817e+000	134	39	8.733342e+000	0	0	0	0	0	0	66.8648	1	1	57.5363	41.2667
DATA	1139	14	34	0	0	A_64_P013243	A_64_P013243	7587.56	276.74	6.885518e+003	6.885643e+002	6425	46.5	9.585617e+000	0	0	0	0	0	0	6461.72	1	1	49.5074	45.8333
DATA	1140	14	35	0	0	A_64_P029720	NM_001109405	7613.14	276.8	2.606489e+002	2.639320e+001	305.5	43	9.631046e+000	0	0	0	0	0	0	244.185	1	1	46.8651	42.7813
DATA	1141	14	36	0	0	A_43_P13459	NM_001107548	7637.59	276.848	3.561898e+002	3.586082e+001	400	43	8.368294e+000	0	0	0	0	0	0	333.075	1	1	37.847	44.1538
DATA	1142	14	37	0	0	A_64_P053923	NM_001107323	7663.83	276.319	1.395621e+003	1.396243e+002	1399	45	8.425749e+000	0	0	0	0	0	0	1302.1	1	1	46.8651	44.5128
DATA	1143	14	38	0	0	A_44_P1005199	ENSRNOT00000032786	7689.29	276.754	1.314212e+002	1.378987e+001	193.5	46	1.042954e+001	0	0	0	0	0	0	122.333	1	1	45.1352	47.1538
DATA	1144	14	39	0	0	A_44_P104821	NM_024369	7714.75	276.739	2.511427e+002	2.546096e+001	301	48	9.599589e+000	0	0	0	0	0	0	233.181	1	1	46.8651	46.8214
DATA	1145	14	40	0	0	A_64_P009956	A_64_P009956	7740.22	276.866	3.410696e+002	3.436444e+001	389	42	9.905615e+000	0	0	0	0	0	0	315.811	1	1	46.1809	42.9394
DATA	1146	14	41	0	0	A_64_P060947	NM_203334	7765.5	277	3.596327e+001	5.537748e+000	101	43	1.138514e+001	0	0	0	0	0	0	33.2035	1	1	54.1152	44.25
DATA	1147	14	42	0	0	A_64_P103419	NM_001106291	7791	277	4.242405e+000	4.224273e+000	65	43.5	9.881914e+000	0	0	0	0	0	0	-1.3913	0	0	54.9904	43.3438
DATA	1148	14	43	0	0	A_44_P220827	NM_001012051	7816.31	276.986	1.760216e+003	1.760727e+002	1643	48	1.115250e+001	0	0	0	0	0	0	1614.74	1	1	47.2035	49.6333
DATA	1149	14	44	0	1	ETG07_105829	ETG07_105829	7841.5	277	1.490130e+001	4.506324e+000	82	44	1.201601e+001	0	0	0	0	0	0	13.6227	1	0	65	48
DATA	1150	14	45	0	0	A_42_P719478	NM_001191779	7866.84	276.969	4.288023e+001	6.050268e+000	106	47	1.011103e+001	0	0	0	0	0	0	39.0586	1	1	45.4864	47.6563
DATA	1151	14	46	0	0	A_42_P462257	NM_001109481	7892.5	277	1.458908e+004	1.458914e+003	13024	44	1.164296e+001	0	0	0	0	0	0	13237.9	1	1	48.5334	48.0385
DATA	1152	14	47	0	0	A_44_P105634	NM_001007658	7917.88	277.061	2.652551e+002	2.687206e+001	303.5	47	9.829733e+000	0	0	0	0	0	0	239.738	1	1	46.5243	46.9032
DATA	1153	14	48	0	0	A_64_P100594	NM_001000360	7943.42	276.915	9.013828e+001	9.995416e+000	144	43	1.047355e+001	0	0	0	0	0	0	81.1295	1	1	43.3362	43.8148
DATA	1154	14	49	0	0	A_64_P004266	A_64_P004266	7968.5	277	1.755306e+001	4.679457e+000	81	43	1.236793e+001	0	0	0	0	0	0	15.7327	1	0	65	44.9677
DATA	1155	14	50	0	0	A_44_P156343	NM_001000102	7994.39	277.069	1.359738e+001	4.564406e+000	81	47	1.269172e+001	0	0	0	0	0	0	12.133	1	0	65	48.8148
DATA	1156	14	51	0	0	A_42_P504358	NM_001108674	8019.5	277	3.058234e+002	3.089393e+001	339	47	9.689628e+000	0	0	0	0	0	0	271.67	1	1	54.1152	48.5
DATA	1157	14	52	0	0	A_44_P281468	NM_001127556	8045.3	277.453	1.414720e+001	4.619014e+000	81	41	7.767941e+000	0	0	0	0	0	0	12.5092	1	0	45.1352	43.8182
DATA	1158	14	53	0	0	A_43_P12785	NM_053364	8070.5	277	4.436974e+000	4.429968e+000	71.5	43	1.103738e+001	0	0	0	0	0	0	2.86247	0	0	54.1152	44.9032
DATA	1159	14	54	0	0	A_64_P053297	NM_001107278	8095.63	276.735	3.254022e+003	3.254324e+002	2954	40	9.193240e+000	0	0	0	0	0	0	2849.82	1	1	46.5243	40.8519
DATA	1160	14	55	0	0	A_64_P062986	NM_001001018	8121.37	277.404	2.734295e+001	5.232370e+000	92	38.5	8.529857e+000	0	0	0	0	0	0	23.8298	1	1	57.8122	39.9615
DATA	1161	14	56	0	0	A_44_P529226	NM_023091	8146.5	277.352	4.502465e+000	4.483258e+000	67	44	9.900907e+000	0	0	0	0	0	0	0.157695	0	0	57.5363	45.1935
DATA	1162	14	57	0	0	A_42_P559737	NM_020074	8172	277.211	4.368475e+003	4.368707e+002	3888	45	1.231341e+001	0	0	0	0	0	0	3769.13	1	1	46.8651	45.8649
DATA	1163	14	58	0	0	A_44_P1017458	NM_199402	8197.42	277.427	1.358549e+002	1.432057e+001	188.5	44.5	9.840982e+000	0	0	0	0	0	0	116.621	1	1	57.5363	46.0588
DATA	1164	14	59	0	0	A_44_P407750	NM_001127680	8222.57	277.157	1.658063e+003	1.658688e+002	1483	46	6.201737e+000	0	0	0	0	0	0	1416.01	1	1	47.5395	45.3333
DATA	1165	14	60	0	0	A_64_P033872	NM_001037353	8248.14	277.407	2.487045e+001	5.208335e+000	90	40	5.717056e+000	0	0	0	0	0	0	21.1299	1	1	65	39.4483
DATA	1166	14	61	0	0	A_42_P472699	NM_001108061	8273.5	277.352	8.263854e+001	9.457905e+000	137.5	41	7.577113e+000	0	0	0	0	0	0	69.8448	1	1	57.5363	41.0333
DATA	1167	14	62	0	0	A_44_P201215	ENSRNOT00000014231	8298.89	277.5	2.142949e+001	5.096444e+000	85	43	7.656894e+000	0	0	0	0	0	0	18.0181	1	0	56.9804	41.2188
DATA	1168	14	63	0	0	A_64_P129910	NM_001107648	8324.13	276.936	5.840846e+002	5.859314e+001	558	45	9.922359e+000	0	0	0	0	0	0	488.522	1	1	45.835	47.1034
DATA	1169	14	64	0	0	A_64_P027927	NM_022255	8349.58	277.427	1.160014e+002	1.250575e+001	165.5	43.5	7.189843e+000	0	0	0	0	0	0	96.5268	1	1	57.5363	43.5769
DATA	1170	14	65	0	0	A_64_P101623	A_64_P101623	8375.11	277.5	4.308048e+004	4.308050e+003	36115	44.5	7.618949e+000	0	0	0	0	0	0	35663.1	1	1	56.9804	43.875
DATA	1171	14	66	0	0	A_42_P645110	NM_001029919	8400.27	277.137	3.561139e+004	3.561142e+003	29148.5	44	9.575956e+000	0	0	0	0	0	0	29329.2	1	1	48.2044	42.0323
DATA	1172	14	67	0	0	A_64_P017781	NM_001010956	8425.67	277.5	1.465829e+002	1.540693e+001	196	43	9.227707e+000	0	0	0	0	0	0	120.124	1	1	57.5363	43.7667
DATA	1173	14	68	0	0	A_64_P057106	NM_001004087	8451.42	277.427	1.974661e+002	2.031418e+001	228	44	7.741190e+000	0	0	0	0	0	0	161.006	1	1	57.5363	42.7941
DATA	1174	14	69	0	0	A_44_P187005	NM_022238	8476.58	277.427	6.706348e+001	8.242156e+000	126	44.5	8.724717e+000	0	0	0	0	0	0	54.4171	1	1	57.5363	44.5
DATA	1175	14	70	0	0	A_42_P779933	NM_017117	8502.47	277.243	4.283893e+001	6.444842e+000	103	43	9.984837e+000	0	0	0	0	0	0	34.5906	1	1	47.2035	43
DATA	1176	14	71	0	0	A_42_P555701	NM_001107554	8527.51	277.13	1.250518e+004	1.250527e+003	10194	43.5	1.083584e+001	0	0	0	1	0	0	10051	1	1	47.2035	44.1538
DATA	1177	14	72	0	0	A_42_P705302	NM_001107361	8552.87	277.243	1.094546e+004	1.094556e+003	8802	40	5.997030e+000	0	0	0	0	0	0	8757.98	1	1	46.5243	41.6333
DATA	1178	14	73	0	0	A_64_P015435	A_64_P015435	8578.33	277.5	4.218703e+004	4.218706e+003	34541	43.5	1.162510e+001	0	0	0	0	0	0	33610.4	1	1	57.5363	46.3333
DATA	1179	14	74	0	0	A_64_P036217	NM_001000569	8604	277.277	5.808322e+001	7.599719e+000	114	40	8.733426e+000	0	0	0	0	0	0	46.0775	1	1	45.4864	41.0909
DATA	1180	14	75	0	0	A_44_P543511	NM_001024749	8628.97	277.672	2.403103e+003	2.403606e+002	1986	43	9.998064e+000	0	0	0	0	0	0	1899.07	1	1	44.0646	43.8065
DATA	1181	14	76	0	0	A_42_P759043	NM_001134509	8654.24	277.529	9.008905e+002	9.022431e+001	772	42	9.814686e+000	0	0	0	0	0	0	709.233	1	1	47.2035	43.6522
DATA	1182	14	77	0	0	A_42_P679982	NM_001107835	8679.77	277.116	4.713616e+003	4.713876e+002	3793.5	40	6.112472e+000	0	0	0	1	0	0	3697.24	1	1	46.5243	40.3333
DATA	1183	14	78	0	0	A_43_P18064	NM_001106904	8705.26	277.221	7.474283e+001	8.977586e+000	127.5	44.5	8.245772e+000	0	0	0	0	0	0	58.4326	1	1	46.1809	44.4167
DATA	1184	14	79	0	0	A_64_P092143	NM_001129879	8730.5	277.5	4.390492e+003	4.390775e+002	3428	38	7.944388e+000	0	0	0	0	0	0	3422.21	1	1	65	40.5517
DATA	1185	14	80	0	0	A_64_P102886	A_64_P102886	8756	277.545	5.023285e+000	5.007034e+000	71	41	1.090863e+001	0	0	0	0	0	0	1.77661	0	0	65	43.9583
DATA	1186	14	81	66	1	DarkCorner	DarkCorner	8780.91	277.778	5.035215e+000	5.013694e+000	57	42.5	6.194486e+000	0	0	0	0	0	0	-9.84307	0	0	41.0736	42.8529
DATA	1187	14	82	66	1	DarkCorner	DarkCorner	8806.83	277.933	5.046095e+000	5.024528e+000	61	39.5	7.182596e+000	0	0	0	0	0	0	-8.66284	0	0	44.7812	39.6944
DATA	1188	14	83	66	1	DarkCorner	DarkCorner	8832.42	277.573	5.055690e+000	5.034082e+000	62	39.5	9.000894e+000	0	0	0	0	0	0	-5.68385	0	0	57.5363	41.1333
DATA	1189	14	84	66	1	DarkCorner	DarkCorner	8858.16	277.578	5.063044e+000	5.041404e+000	60	38	9.056058e+000	0	0	0	0	0	0	-8.17297	0	0	44.7812	39.814
DATA	1190	14	85	66	1	DarkCorner	DarkCorner	8883.49	277.985	5.067845e+000	5.046185e+000	60.5	35	7.888008e+000	0	0	0	0	0	0	-8.53855	0	0	44.4243	35.8903
DATA	1191	15	1	66	1	DarkCorner	DarkCorner	6737.12	283.269	4.426859e+000	4.421835e+000	64	40	8.403046e+000	0	0	0	0	0	0	3.08969	0	0	54.1152	40.3071
DATA	1192	15	2	66	1	DarkCorner	DarkCorner	6763.08	283.076	4.406154e+000	4.387322e+000	58	42	8.939865e+000	0	0	0	0	0	0	-4.90515	0	0	49.5074	43.2759
DATA	1193	15	3	66	1	DarkCorner	DarkCorner	6786.33	283.641	4.387494e+000	4.368741e+000	57	47	9.348750e+000	0	0	0	0	0	0	-5.45752	0	0	44.4243	46.283
DATA	1194	15	4	66	1	DarkCorner	DarkCorner	6813.5	283.5	4.366937e+000	4.348272e+000	60	42	8.412653e+000	0	0	0	0	0	0	-2.73581	0	0	57.5363	44.9091
DATA	1195	15	5	66	1	DarkCorner	DarkCorner	6838.67	283.5	4.348410e+000	4.337123e+000	66	45	7.149349e+000	0	0	0	0	0	0	2.25842	0	0	57.5363	46.0882
DATA	1196	15	6	0	0	A_44_P451392	NM_001108023	6863.79	283.26	7.179841e+002	7.192779e+001	701.5	45	6.785659e+000	0	0	0	0	0	0	647.341	1	1	48.5334	44.3871
DATA	1197	15	7	0	0	A_64_P012661	ENSRNOT00000010298	6889.25	283.373	1.540432e+003	1.541030e+002	1461	42	9.182755e+000	0	0	0	0	0	0	1394.51	1	1	46.1809	42.2333
DATA	1198	15	8	0	0	A_42_P546058	NM_053670	6914.61	283.278	2.620878e+003	2.621227e+002	2414	45.5	8.252625e+000	0	0	0	1	0	0	2381.8	1	1	48.5334	46.5714
DATA	1199	15	9	0	0	A_42_P695401	NM_031530	6940.42	283.573	1.474402e+002	1.534761e+001	196.5	45	8.173514e+000	0	0	0	1	0	0	134.506	1	1	57.5363	44.4783
DATA	1200	15	10	0	0	A_44_P192193	A_44_P192193	6965.22	283.806	1.887580e+002	1.934764e+001	237	47.5	8.770317e+000	0	0	0	0	0	0	172.807	1	1	47.8731	47.0385
DATA	1201	15	11	0	0	A_42_P473886	NM_001165922	6990.78	284.132	4.243308e+002	4.264359e+001	456	45	1.105990e+001	0	0	0	0	0	0	389.826	1	1	46.1809	45.3929
DATA	1202	15	12	0	0	A_42_P576953	NM_138882	7016.31	283.662	9.006572e+002	9.016446e+001	911	44.5	8.393971e+000	0	0	0	0	0	0	830.061	1	1	48.5334	44.9737
DATA	1203	15	13	0	0	A_44_P260227	ENSRNOT00000036745	7041.89	283.5	6.362703e+001	7.627049e+000	119	44	7.094907e+000	0	0	0	0	0	0	58.8194	1	1	56.9804	44.2813
DATA	1204	15	14	0	0	A_44_P276435	NM_053853	7066.96	283.449	3.322441e+002	3.348805e+001	371.5	44	1.008593e+001	0	0	0	1	0	0	308.011	1	1	47.5395	44.5429
DATA	1205	15	15	0	0	A_43_P19066	NM_001017494	7092.44	283.521	2.116991e+002	2.157911e+001	264	43	7.962939e+000	0	0	0	0	0	0	196.79	1	1	48.2044	43.0571
DATA	1206	15	16	0	0	A_64_P113200	ENSRNOT00000061930	7118.11	283.5	3.358324e+001	5.355698e+000	97	44	8.192421e+000	0	0	0	0	0	0	31.2968	1	1	65	44.5172
DATA	1207	15	17	0	0	A_42_P480108	NM_001007637	7143.24	283.529	1.256237e+003	1.256927e+002	1231	42	9.984519e+000	0	0	0	0	0	0	1173.38	1	1	47.2035	42.6579
DATA	1209	15	19	0	0	A_44_P420046	NM_021669	7194.42	283.573	9.281344e+001	1.016518e+001	154	42.5	7.439117e+000	0	0	0	0	0	0	87.0405	1	1	57.5363	43.4118
DATA	1210	15	20	0	0	A_64_P077021	A_64_P077021	7219.61	283.972	2.747286e+001	4.967524e+000	88	40	9.987069e+000	0	0	0	0	0	0	25.8082	1	1	48.2044	42.3077
DATA	1211	15	21	0	0	A_44_P292558	NM_213559	7244.94	283.232	4.617852e+002	4.636310e+001	489	40	8.773327e+000	0	0	0	0	0	0	434.401	1	1	46.5243	42.1667
DATA	1212	15	22	0	0	A_42_P471653	NM_001031654	7270.34	283.686	4.266340e+001	5.936226e+000	104	44	8.726270e+000	0	0	0	0	0	0	40.1859	1	1	47.8731	42.1724
DATA	1213	15	23	0	0	A_43_P12000	NM_019272	7295.5	283.5	1.125958e+003	1.126713e+002	1136.5	44.5	1.119169e+001	0	0	0	0	0	0	1061.64	1	1	49.1849	46.0714
DATA	1214	15	24	0	0	A_64_P131395	NM_001037523	7321.36	283.955	7.861844e+000	4.194159e+000	73	41.5	8.383872e+000	0	0	0	0	0	0	7.41931	1	0	45.835	42.9688
DATA	1215	15	25	0	0	A_42_P682853	NM_017193	7346.36	283.758	8.282126e+002	8.292355e+001	852	42	6.396867e+000	0	0	0	0	0	0	782.034	1	1	45.835	42.4091
DATA	1216	15	26	0	0	A_42_P647505	TC640289	7371.65	283.88	3.794897e+003	3.795121e+002	3589	41.5	8.080761e+000	0	0	0	0	0	0	3584.7	1	1	48.8603	41.8182
DATA	1217	15	27	0	0	A_44_P682959	NM_001025139	7397.2	284.369	1.202047e+001	4.287002e+000	75	45.5	1.003181e+001	0	0	0	0	0	0	11.357	1	0	45.4864	45.8611
DATA	1218	15	28	0	0	A_64_P249426	NM_001014271	7422.5	284	2.134730e+001	4.636190e+000	87	43	8.294058e+000	0	0	0	0	0	0	20.1669	1	1	54.1152	44.4839
DATA	1219	15	29	0	0	A_64_P133430	NM_001044282	7448.5	284	3.383148e+004	3.383151e+003	31547	42.5	1.096305e+001	0	0	0	0	0	0	31951.2	1	1	54.1152	44.1333
DATA	1220	15	30	0	0	A_42_P635611	NM_001025685	7473.5	284	4.136492e+000	4.121510e+000	67	41	7.231892e+000	0	0	0	0	0	0	1.4074	0	0	54.1152	42.1786
DATA	1221	15	31	0	0	A_42_P592013	NM_001127600	7498.43	283.761	3.049290e+003	3.049568e+002	2853	43	8.063327e+000	0	0	0	0	0	0	2876.2	1	1	46.5243	41.5
DATA	1222	15	32	0	1	ETG02_36680	ETG02_36680	7524.5	284	5.398246e+000	4.160993e+000	72.5	43	8.849313e+000	0	0	0	0	0	0	5.08696	1	0	65	42.1034
DATA	1223	15	33	0	0	A_42_P608478	NM_001025131	7549.5	284	2.019187e+001	4.597718e+000	86	38	9.951978e+000	0	0	0	0	0	0	19.0055	1	0	54.1152	40.4483
DATA	1224	15	34	0	0	A_44_P137397	NM_017236	7575.5	284	8.234297e+004	8.234298e+003	77068	46	8.694054e+000	0	0	0	0	0	0	77394.5	1	1	54.1152	44.5909
DATA	1226	15	36	0	0	A_64_P110789	A_64_P110789	7626	284	2.226837e+001	4.710264e+000	88	42.5	7.173431e+000	0	0	0	0	0	0	20.8588	1	1	54.9904	41.7647
DATA	1227	15	37	0	0	A_64_P061562	A_64_P061562	7651.22	283.918	1.231432e+003	1.232134e+002	1192	44	7.581305e+000	0	0	0	0	0	0	1151.15	1	1	47.8731	44
DATA	1228	15	38	0	0	A_44_P511359	NM_001108736	7676.88	284	5.279717e+002	5.296147e+001	565	46	1.009472e+001	0	0	0	0	0	0	492.444	1	1	49.8279	46.6
DATA	1229	15	39	0	0	A_42_P658220	NM_001109598	7702	283.922	2.598669e+003	2.599005e+002	2496.5	48	1.055516e+001	0	0	0	0	0	0	2417.95	1	1	46.1809	46.8214
DATA	1230	15	40	0	0	A_42_P479096	NM_001008293	7727.39	283.871	1.338637e+003	1.339293e+002	1301	44	9.533867e+000	0	0	0	0	0	0	1242.26	1	1	47.2035	44.1935
DATA	1231	15	41	0	0	A_64_P275280	NM_001109569	7752.68	284	6.813975e+003	6.814104e+002	6279	43	1.201370e+001	0	0	0	0	0	0	6305.71	1	1	48.5334	45.9355
DATA	1232	15	42	0	0	A_42_P785926	NM_001108289	7778.29	284.014	1.679899e+003	1.680427e+002	1648	46	1.003466e+001	0	0	0	0	0	0	1549.87	1	1	46.5243	44.1389
DATA	1233	15	43	0	0	A_64_P005238	A_64_P005238	7803.76	284.363	4.966052e+001	6.521740e+000	112	44.5	1.060417e+001	0	0	0	0	0	0	45.6718	1	1	51.0895	45.3214
DATA	1234	15	44	0	0	A_42_P555753	NM_001106401	7828.79	284.395	5.466820e+003	5.466985e+002	4958	42	8.358628e+000	0	0	0	0	0	0	5011.05	1	1	49.1849	45
DATA	1235	15	45	0	0	A_42_P469751	XM_001054007	7854.36	283.682	5.086412e+003	5.086590e+002	4699	46.5	9.736653e+000	0	0	0	0	0	0	4645.32	1	1	45.835	46.6875
DATA	1236	15	46	0	0	A_44_P506124	XM_222590	7879.87	283.855	4.304894e+003	4.305106e+002	3942.5	47	1.195205e+001	0	0	0	0	0	0	3917.02	1	1	45.4864	49.5806
DATA	1237	15	47	0	0	A_44_P441947	XM_001079870	7905.06	283.969	1.893450e+003	1.893936e+002	1822	42	8.196178e+000	0	0	0	0	0	0	1716.26	1	1	46.8651	43.9655
DATA	1238	15	48	0	0	A_64_P127659	NM_001106228	7930.38	284.216	3.870760e+003	3.871000e+002	3573.5	45	1.016126e+001	0	0	0	0	0	0	3494.61	1	1	49.1849	47.5862
DATA	1239	15	49	0	0	A_42_P733076	NM_001033867	7956.05	284.477	4.405247e+002	4.426422e+001	471	41	1.307974e+001	0	0	0	0	0	0	396.056	1	1	65	44.7097
DATA	1240	15	50	0	0	A_64_P145939	NM_001109499	7981.5	284.527	7.582746e+001	8.738458e+000	135	44	1.202727e+001	0	0	0	0	0	0	67.8801	1	1	49.1849	46.697
DATA	1241	15	51	0	0	A_44_P1040796	NM_001106660	8006.61	284.406	2.044254e+004	2.044259e+003	18077.5	56.5	1.230228e+001	0	0	0	0	0	0	18219.7	1	1	47.5395	54.9583
DATA	1242	15	52	0	0	A_42_P588072	NM_001106829	8032.42	284.427	1.585196e+002	1.644660e+001	209.5	45	8.209958e+000	0	0	0	0	0	0	140.631	1	1	57.5363	44.1818
DATA	1243	15	53	0	0	A_64_P045823	ENSRNOT00000023172	8057.58	284.427	2.477001e+002	2.515825e+001	287	40	8.845460e+000	0	0	0	0	0	0	218.734	1	1	65	42.3704
DATA	1244	15	54	0	0	A_42_P591344	NM_001037780	8083.11	284.5	4.958816e+002	4.978510e+001	499	44	1.118359e+001	0	0	0	0	0	0	435.806	1	1	56.9804	46.9643
DATA	1245	15	55	0	0	A_64_P120322	A_64_P120322	8108.5	284.5	4.464474e+000	4.459518e+000	71.5	37	8.619760e+000	0	0	0	0	0	0	3.10186	0	0	57.5363	39.1786
DATA	1246	15	56	0	0	A_64_P062665	NM_001170470	8133.54	284.176	5.849809e+002	5.866842e+001	555.5	43.5	6.701584e+000	0	0	0	0	0	0	509.112	1	1	48.8603	42.9583
DATA	1247	15	57	0	0	A_44_P398300	NM_001005538	8159.11	284.352	3.182694e+003	3.183011e+002	2819	48	1.138185e+001	0	0	0	0	0	0	2756.06	1	1	47.8731	48.8108
DATA	1248	15	58	0	0	A_64_P001545	ENSRNOT00000029141	8184.56	284.483	3.842672e+004	3.842675e+003	32909	48	1.041456e+001	0	0	0	0	0	0	33107.7	1	1	52.9257	46.9655
DATA	1249	15	59	0	0	A_44_P1010653	NM_001109021	8209.93	284.493	5.775122e+003	5.775300e+002	4929	44	8.711241e+000	0	0	0	0	0	0	4950.37	1	1	48.5334	44.6667
DATA	1250	15	60	0	0	A_44_P398969	NM_001013225	8235.45	284.384	7.012058e+002	7.026864e+001	669.5	42	5.928141e+000	0	0	0	0	0	0	597.95	1	1	48.2044	42
DATA	1251	15	61	0	0	A_64_P059495	NM_001109986	8260.61	284.278	4.533072e+003	4.533303e+002	3913	40.5	6.963752e+000	0	0	0	0	0	0	3845.71	1	1	48.5334	40.5769
DATA	1252	15	62	0	0	A_64_P037040	A_64_P037040	8286.06	284.536	3.141610e+002	3.175203e+001	329	39.5	7.138464e+000	0	0	0	0	0	0	265.152	1	1	47.5395	40.0714
DATA	1253	15	63	0	0	A_64_P051446	NM_001142942	8311.37	284.5	1.173988e+004	1.173997e+003	9546.5	45	6.832164e+000	0	0	0	0	0	0	9857.24	1	1	47.8731	44.0385
DATA	1254	15	64	0	0	A_42_P701756	NM_001107646	8336.92	284.278	4.377821e+003	4.378068e+002	3857	45	9.892988e+000	0	0	0	0	0	0	3656.54	1	1	47.8731	46.3939
DATA	1255	15	65	0	0	A_44_P172604	NM_031795	8362.07	284.507	5.715557e+003	5.715749e+002	4651	44	9.775414e+000	0	0	0	0	0	0	4749.75	1	1	48.5334	45.6061
DATA	1256	15	66	0	0	A_64_P152000	A_64_P152000	8387.58	284.573	4.722707e+000	4.704392e+000	69	45.5	8.173689e+000	0	0	0	0	0	0	1.0965	0	0	65	44.4667
DATA	1257	15	67	0	0	A_44_P339008	NM_001024975	8413.28	284.689	1.109237e+003	1.110244e+002	970	47	1.064948e+001	0	0	0	0	0	0	912.422	1	1	48.2044	44.1786
DATA	1258	15	68	0	0	A_44_P560070	A_44_P560070	8438.58	284.573	5.285980e+000	4.779539e+000	73.5	44	7.672424e+000	0	0	0	0	0	0	4.32642	1	0	57.5363	43.5926
DATA	1259	15	69	0	0	A_44_P520509	NM_001033868	8464.06	284.389	1.007199e+004	1.007211e+003	8111.5	44.5	9.018295e+000	0	0	0	0	0	0	8202.88	1	1	48.2044	44.6563
DATA	1260	15	70	0	0	A_42_P643349	NM_001109495	8489.46	284.582	5.389793e+001	7.215110e+000	110	43	8.784253e+000	0	0	0	0	0	0	43.6868	1	1	46.5243	42.4412
DATA	1261	15	71	0	0	A_44_P215075	NM_012667	8514.85	284.768	1.196126e+002	1.289554e+001	169.5	45.5	1.053157e+001	0	0	0	0	0	0	96.5012	1	1	46.1809	45.6071
DATA	1262	15	72	0	0	A_44_P560363	ENSRNOT00000049736	8539.94	284.627	2.741077e+003	2.741505e+002	2345	42	8.006408e+000	0	0	0	0	0	0	2201.45	1	1	45.835	42.2222
DATA	1263	15	73	0	0	A_44_P553158	NM_001014014	8565.5	284.5	2.054804e+003	2.055380e+002	1703	43.5	1.148152e+001	0	0	0	0	0	0	1642.92	1	1	52.9257	45.5882
DATA	1264	15	74	0	0	A_64_P165277	NM_001106370	8590.91	284.614	4.904200e+000	4.883239e+000	67	44.5	9.995543e+000	0	0	0	0	0	0	-1.91554	0	0	57.259	44.7059
DATA	1265	15	75	0	0	A_64_P138187	A_64_P138187	8616.44	284.598	1.572029e+003	1.572793e+002	1343.5	41	1.080721e+001	0	0	0	0	0	0	1246.5	1	1	51.4001	41.0645
DATA	1266	15	76	0	0	A_44_P429041	XM_227654	8641.94	285.175	4.774722e+002	4.800021e+001	446	41	1.127312e+001	0	0	0	0	0	0	377.176	1	1	45.4864	43.6
DATA	1267	15	77	0	0	A_44_P465880	NM_199389	8667.19	284.643	3.201711e+003	3.202092e+002	2607	41	7.069391e+000	0	0	0	0	0	0	2519.72	1	1	51.4001	40.3913
DATA	1268	15	78	0	0	A_44_P381740	NM_001000239	8692.5	285	1.720322e+001	5.246739e+000	81	42	7.738968e+000	0	0	0	0	0	0	13.4938	1	0	54.1152	42.9655
DATA	1269	15	79	0	0	A_64_P045211	NM_001191733	8717.61	284.931	2.971166e+001	5.792371e+000	92	39	7.219880e+000	0	0	0	0	0	0	23.232	1	1	53.8203	40.72
DATA	1270	15	80	0	0	A_64_P010896	A_64_P010896	8743.5	285	5.726630e+000	5.019671e+000	72	37	9.835845e+000	0	0	0	0	0	0	4.46463	1	0	54.1152	40.3793
DATA	1271	15	81	0	0	A_42_P566906	NM_001006966	8768.88	285	4.325657e+003	4.325946e+002	3432.5	40.5	8.015370e+000	0	0	0	0	0	0	3363.66	1	1	49.8279	42.3846
DATA	1272	15	82	66	1	DarkCorner	DarkCorner	8794.62	285.421	5.032450e+000	5.010941e+000	59	42	5.586210e+000	0	0	0	0	0	0	-8.97044	0	0	48.2044	42.0333
DATA	1273	15	83	66	1	DarkCorner	DarkCorner	8819.5	285	5.042560e+000	5.021008e+000	60	39.5	8.962837e+000	0	0	0	0	0	0	-9.15052	0	0	54.1152	40.9706
DATA	1274	15	84	66	1	DarkCorner	DarkCorner	8844.5	285	5.050525e+000	5.028939e+000	58.5	39	8.810935e+000	0	0	0	0	0	0	-9.39801	0	0	54.1152	39.4848
DATA	1275	15	85	66	1	DarkCorner	DarkCorner	8870.23	285.272	5.056496e+000	5.034884e+000	59.5	37.5	7.949572e+000	0	0	0	0	0	0	-6.98521	0	0	49.8279	39.4808
DATA	1276	16	1	66	1	DarkCorner	DarkCorner	6750.03	290.41	4.410526e+000	4.392770e+000	62	45	8.923284e+000	0	0	0	0	0	0	0.868254	0	0	43.7019	46.375
DATA	1277	16	2	66	1	DarkCorner	DarkCorner	6774.46	291.169	4.390726e+000	4.372236e+000	63	48	8.888194e+000	0	0	0	0	0	0	0.437404	0	0	42.9674	47
DATA	1278	16	3	66	1	DarkCorner	DarkCorner	6800.58	290.573	4.371231e+000	4.352548e+000	60	44	9.364408e+000	0	0	0	0	0	0	-2.14603	0	0	57.5363	43.6977
DATA	1279	16	4	66	1	DarkCorner	DarkCorner	6826.09	290.935	4.352051e+000	4.333450e+000	59.5	49	8.203812e+000	0	0	0	0	0	0	-3.74204	0	0	54.4085	46.2083
DATA	1280	16	5	0	0	A_42_P708614	NM_001130505	6851.5	291	4.792003e+004	4.792005e+003	43270.5	48	6.990634e+000	0	0	0	0	0	0	43174.4	1	1	54.1152	46.6
DATA	1281	16	6	0	0	A_44_P427177	NM_053923	6876.32	290.971	2.198489e+001	4.827812e+000	82	45	8.400944e+000	0	0	0	0	0	0	19.8864	1	1	46.1809	44.1
DATA	1282	16	7	0	0	A_44_P417051	NM_001024886	6902.13	291.065	8.396862e+001	9.425200e+000	139.5	42	7.972353e+000	0	0	0	0	0	0	76.2582	1	1	45.1352	43.5926
DATA	1283	16	8	0	0	A_64_P052917	ENSRNOT00000029053	6927.54	290.905	4.365488e+001	6.103071e+000	104.5	45	6.987136e+000	0	0	0	0	0	0	39.7954	1	1	44.0646	45.4848
DATA	1284	16	9	0	0	A_42_P689013	NM_053800	6952.94	290.988	1.880104e+004	1.880109e+003	17267	46	8.427092e+000	0	0	0	0	0	0	17201.3	1	1	50.7771	45.1429
DATA	1285	16	10	0	0	A_42_P668072	NM_013130	6978.17	291	5.440905e+002	5.457361e+001	546	45	1.026990e+001	0	0	0	0	0	0	499.513	1	1	46.8651	45.2857
DATA	1286	16	11	0	0	A_44_P762596	XM_237156	7003.51	291.174	5.596647e+002	5.612540e+001	571	47.5	9.882985e+000	0	0	0	0	0	0	515.517	1	1	47.2035	45.5625
DATA	1287	16	12	0	0	A_44_P673662	TC577636	7029.5	291	1.639816e+002	1.692934e+001	221	44	7.690452e+000	0	0	0	0	0	0	151.526	1	1	54.1152	44.5897
DATA	1288	16	13	0	0	A_42_P674598	NM_013067	7054.5	291	5.157034e+004	5.157036e+003	47022.5	44	1.188474e+001	0	0	0	1	0	0	47791.5	1	1	54.1152	45.4
DATA	1289	16	14	0	0	A_44_P529994	NM_001191720	7080.06	291.014	1.731133e+001	4.527699e+000	80	43	1.129142e+001	0	0	0	0	0	0	16.0875	1	0	46.8651	43.6061
DATA	1290	16	15	0	0	A_42_P655644	NM_133618	7105.17	291	3.273038e+003	3.273304e+002	3015	43.5	9.672886e+000	0	0	0	0	0	0	3049.38	1	1	46.8651	44.9474
DATA	1291	16	16	0	0	A_42_P589674	NM_001044225	7130.37	291	6.341724e+003	6.341860e+002	5996	45	1.227744e+001	0	0	0	0	0	0	5922.33	1	1	46.5243	46.0714
DATA	1292	16	17	0	0	A_64_P010139	A_64_P010139	7155.79	291.137	4.824472e+002	4.842323e+001	510.5	44	8.422215e+000	0	0	0	0	0	0	451.534	1	1	47.8731	42.0606
DATA	1293	16	18	0	0	A_42_P586883	NM_001106416	7181.5	291.352	9.303164e+001	1.018506e+001	150	47.5	7.250626e+000	0	0	0	0	0	0	87.2472	1	1	57.5363	46.5938
DATA	1294	16	19	0	0	A_42_P461144	DV724416	7206.75	291.13	1.867580e+003	1.868038e+002	1785	43	8.592550e+000	0	0	0	0	0	0	1754.5	1	1	46.1809	43.2963
DATA	1295	16	20	0	0	A_64_P130565	NM_031668	7232.5	291.352	2.346476e+002	2.382576e+001	297	45	9.092954e+000	0	0	0	0	0	0	220.794	1	1	57.5363	44.5
DATA	1296	16	21	0	0	A_64_P002826	NM_001134527	7257.55	291.239	1.695685e+002	1.745171e+001	225	44	8.079191e+000	0	0	0	0	0	0	159.767	1	1	47.5395	42.24
DATA	1298	16	23	0	0	A_64_P036099	A_64_P036099	7308.36	290.712	3.521881e+003	3.522122e+002	3357.5	45.5	1.220262e+001	0	0	0	0	0	0	3324.93	1	1	45.835	45.1944
DATA	1299	16	24	0	0	A_64_P080580	ENSRNOT00000040473	7333.94	291.123	8.992940e+002	9.002351e+001	922	41	6.270429e+000	0	0	0	0	0	0	849.639	1	1	51.0895	41.5806
DATA	1300	16	25	0	0	A_43_P12276	NM_022636	7359.55	291.197	3.942925e+001	5.697755e+000	104	41	9.040280e+000	0	0	0	0	0	0	37.2704	1	1	47.5395	41.32
DATA	1301	16	26	0	0	A_42_P505393	NM_199085	7384.5	291.289	1.386977e+003	1.387586e+002	1361	44	9.193705e+000	0	0	0	1	0	0	1311.38	1	1	49.1849	43.7037
DATA	1302	16	27	0	0	A_44_P883619	ENSRNOT00000032374	7410.33	291.5	4.129444e+000	4.112644e+000	66.5	44	6.439420e+000	0	0	0	0	0	0	0.79044	0	0	65	45.4412
DATA	1303	16	28	0	0	A_44_P493894	ENSRNOT00000050156	7435.5	291.5	2.112355e+005	2.112355e+004	197762	43	8.824467e+000	0	0	0	0	0	0	199697	1	1	57.5363	43.9394
DATA	1304	16	29	0	0	A_64_P085334	TC585414	7460.63	290.735	1.034231e+004	1.034239e+003	9730	44	9.866273e+000	0	0	0	0	0	0	9772.62	1	1	46.5243	44.52
DATA	1306	16	31	0	0	A_64_P045433	A_64_P045433	7511.44	291.04	7.630956e+003	7.631067e+002	7193	43.5	8.335238e+000	0	0	0	0	0	0	7200.26	1	1	48.8603	43.0714
DATA	1307	16	32	0	0	A_64_P025351	AY724474	7536.84	291.118	3.368595e+004	3.368597e+003	31156	39	1.034626e+001	0	0	0	0	0	0	31751.2	1	1	46.5243	42.3871
DATA	1308	16	33	0	0	A_44_P501626	ENSRNOT00000050744	7562.5	291.5	1.651219e+001	4.447859e+000	82	38	8.987414e+000	0	0	0	0	0	0	15.5443	1	0	57.5363	41.1176
DATA	1309	16	34	0	0	A_64_P071525	NM_001000141	7587.67	291.5	4.153889e+000	4.136135e+000	66	41	8.160299e+000	0	0	0	0	0	0	-0.753274	0	0	57.5363	42.0952
DATA	1310	16	35	0	0	A_64_P006545	A_64_P006545	7612.89	291.352	1.768025e+004	1.768030e+003	16873	42.5	8.958451e+000	0	0	0	0	0	0	16590.8	1	1	47.8731	41.45
DATA	1311	16	36	0	0	A_64_P089561	NM_001044265	7638.49	291.687	7.473340e+001	8.548822e+000	138	46	7.301671e+000	0	0	0	0	0	0	69.9954	1	1	46.5243	44.2424
DATA	1312	16	37	0	0	A_44_P791108	NM_001014070	7664.11	291.5	3.454088e+001	5.407131e+000	97	44	8.797522e+000	0	0	0	0	0	0	32.281	1	1	56.9804	44.2162
DATA	1313	16	38	0	0	A_44_P161535	A_44_P161535	7689.5	291.265	7.221889e+003	7.222010e+002	7030	45.5	9.001880e+000	0	0	0	0	0	0	6733.51	1	1	46.5243	44.9231
DATA	1314	16	39	0	0	A_44_P299136	NM_001108539	7714.63	291.37	6.675608e+002	6.688684e+001	683	47.5	1.070614e+001	0	0	0	0	0	0	620.869	1	1	48.2044	46.3077
DATA	1315	16	40	1028	1	(+)E1A_r60_a97	E1A_r60_a97	7740.33	291.5	4.209769e+000	4.191776e+000	63	43	1.065692e+001	0	0	0	0	0	0	-4.31356	0	0	65	43.3548
DATA	1316	16	41	0	0	A_44_P161723	NM_001134526	7765.16	291.543	1.275561e+002	1.343044e+001	191	44.5	1.259939e+001	0	0	0	0	0	0	117.974	1	1	47.5395	45.1786
DATA	1317	16	42	0	0	A_64_P121443	A_64_P121443	7791	291.545	4.235076e+000	4.216975e+000	63	45	9.894832e+000	0	0	0	0	0	0	-1.90219	0	0	55.8519	43.7
DATA	1318	16	43	0	0	A_42_P771373	NM_012614	7816.18	291.493	9.710287e+003	9.710379e+002	8850.5	43	1.065263e+001	0	0	0	1	0	0	8923.46	1	1	47.8731	46.0385
DATA	1319	16	44	0	0	A_44_P1025944	NM_147140	7841.44	291.534	1.199872e+004	1.199880e+003	10835	44	8.021295e+000	0	0	0	0	0	0	10988.7	1	1	49.1849	45.8
DATA	1320	16	45	0	0	A_64_P014085	NM_001007678	7867.06	291.611	1.195943e+003	1.196702e+002	1153	47	1.546367e+001	0	0	0	0	0	0	1091.3	1	1	48.2044	48.8125
DATA	1321	16	46	0	0	A_64_P095298	NM_001047963	7892.58	291.573	5.807714e+001	7.212638e+000	120.5	42	6.575228e+000	0	0	0	0	0	0	52.7939	1	1	57.5363	42.8148
DATA	1322	16	47	0	0	A_64_P122037	A_64_P122037	7917.94	291.462	2.888348e+004	2.888351e+003	26301	44	9.854964e+000	0	0	0	0	0	0	26152.6	1	1	44.7812	47.0294
DATA	1323	16	48	0	0	A_64_P098094	A_64_P098094	7943.42	291.573	9.215394e+004	9.215395e+003	81896	44	1.028591e+001	0	0	0	0	0	0	83101	1	1	57.5363	45
DATA	1324	16	49	0	0	A_44_P353708	ENSRNOT00000033510	7968.69	291.646	7.176601e+001	8.381458e+000	134.5	44	1.228576e+001	0	0	0	0	0	0	64.4451	1	1	45.835	45.8387
DATA	1325	16	50	0	0	A_42_P541669	ENSRNOT00000043345	7994.04	291.667	1.560155e+003	1.560761e+002	1464	47.5	1.113054e+001	0	0	0	0	0	0	1394.93	1	1	48.5334	49.5
DATA	1326	16	51	0	0	A_42_P560894	NM_019138	8019.35	291.778	7.259199e+003	7.259331e+002	6613	49	1.087785e+001	0	0	0	0	0	0	6461.64	1	1	47.5395	50.5517
DATA	1327	16	52	0	0	A_42_P498066	NM_031136	8045	291.545	9.234263e+004	9.234264e+003	80106.5	42	9.188703e+000	0	0	0	0	0	0	81814	1	1	55.8519	44.0323
DATA	1328	16	53	0	0	A_42_P538928	NM_053021	8070.17	291.536	2.889296e+004	2.889300e+003	25425	46	1.262073e+001	0	0	0	1	0	0	25479.7	1	1	47.2035	48.4
DATA	1329	16	54	0	0	A_64_P302169	NM_001099493	8095.58	291.573	4.013152e+001	5.977412e+000	103.5	41	8.912912e+000	0	0	0	0	0	0	35.2215	1	1	65	41.76
DATA	1330	16	55	0	0	A_43_P18282	NM_001173436	8121.37	291.596	1.145619e+002	1.229080e+001	171	44	1.315890e+001	0	0	0	0	0	0	100.049	1	1	65	45.36
DATA	1331	16	56	0	0	A_44_P304169	NM_001000482	8146.69	291.359	2.610669e+002	2.648730e+001	295	44	9.403103e+000	0	0	0	0	0	0	226.862	1	1	44.4243	43.9688
DATA	1332	16	57	0	0	A_44_P318932	XM_231081	8171.77	291.87	6.068314e+003	6.068481e+002	5514.5	49	8.882866e+000	0	0	0	0	0	0	5247.57	1	1	46.1809	49.0303
DATA	1333	16	58	0	0	A_64_P124621	A_64_P124621	8197	292	1.349132e+002	1.422792e+001	187	44	9.591439e+000	0	0	0	0	0	0	116.082	1	1	46.8651	44.9355
DATA	1334	16	59	0	0	A_42_P553960	NM_001107831	8222.5	292	9.637600e+003	9.637707e+002	7937	43.5	5.665733e+000	0	0	0	0	0	0	8249.89	1	1	48.5334	43.2143
DATA	1335	16	60	0	0	A_64_P129459	A_64_P129459	8248.06	292.023	1.017251e+003	1.018275e+002	954	42	7.666831e+000	0	0	0	0	0	0	866.283	1	1	51.4001	42.697
DATA	1336	16	61	0	0	A_64_P083224	ENSRNOT00000017383	8273.38	291.762	2.987991e+001	5.476240e+000	93.5	42	7.512355e+000	0	0	0	0	0	0	25.3137	1	1	44.7812	42.125
DATA	1337	16	62	0	0	A_64_P031840	NM_001017445	8298.5	292	1.800510e+003	1.801101e+002	1572	43	7.284652e+000	0	0	0	0	0	0	1517.63	1	1	48.5334	41.1154
DATA	1338	16	63	0	0	A_43_P16427	NM_001191000	8324.17	291.829	1.238879e+002	1.322810e+001	174	44	9.430467e+000	0	0	0	0	0	0	103.877	1	1	46.8651	46.3939
DATA	1339	16	64	0	0	A_64_P159034	NM_001191681	8349.55	291.915	3.020447e+004	3.020450e+003	26080	45	9.731735e+000	0	0	0	0	0	0	25196.2	1	1	49.8279	47.04
DATA	1340	16	65	0	0	A_64_P009007	A_64_P009007	8375	292	5.989318e+001	7.603771e+000	120	43	8.842155e+000	0	0	0	0	0	0	49.7075	1	1	65	42.3939
DATA	1341	16	66	0	0	A_42_P489817	NM_001107681	8400.33	291.958	4.527432e+003	4.527677e+002	3872	45	1.090649e+001	0	0	0	1	0	0	3738.52	1	1	48.5334	43.125
DATA	1342	16	67	0	0	A_42_P643272	NM_053389	8425.76	292	2.983779e+003	2.984154e+002	2511	46	7.213769e+000	0	0	0	0	0	0	2451.56	1	1	46.8651	43.9615
DATA	1343	16	68	0	0	A_64_P076063	XM_001061753	8451.11	291.931	1.282557e+002	1.367877e+001	169	44	8.579287e+000	0	0	0	0	0	0	104.86	1	1	46.8651	43.3333
DATA	1344	16	69	0	0	A_64_P047371	NM_001109423	8476.63	291.873	2.467505e+003	2.467968e+002	2111	41.5	8.146644e+000	0	0	0	0	0	0	2007.6	1	1	47.5395	41.6667
DATA	1345	16	70	0	0	A_44_P991940	XM_225667	8501.81	292.06	2.789993e+002	2.830997e+001	291	45.5	9.866127e+000	0	0	0	0	0	0	225.944	1	1	46.1809	45.4118
DATA	1346	16	71	0	0	A_42_P667802	ENSRNOT00000014585	8527.38	292	3.582679e+002	3.615000e+001	351.5	43	1.085669e+001	0	0	0	1	0	0	288.793	1	1	48.5334	44.7083
DATA	1347	16	72	0	0	A_44_P433942	A_44_P433942	8552.64	291.851	8.425570e+001	9.719197e+000	136	40	6.204057e+000	0	0	0	0	0	0	67.6139	1	1	45.835	40.9032
DATA	1348	16	73	0	0	A_42_P735279	NM_001004446	8578	291.774	2.828802e+004	2.828806e+003	22575	45	1.166955e+001	0	0	0	0	0	0	22602.8	1	1	45.4864	48.3871
DATA	1349	16	74	0	0	A_64_P000316	A_64_P000316	8603.5	292.352	1.011799e+002	1.123575e+001	149	47.5	1.155563e+001	0	0	0	0	0	0	80.5194	1	1	65	46.3056
DATA	1350	16	75	0	0	A_64_P073357	XM_001070426	8629.18	291.902	1.059466e+002	1.167522e+001	152	45	1.081929e+001	0	0	0	0	0	0	83.9691	1	1	44.7812	44.1667
DATA	1351	16	76	0	0	A_42_P501972	NM_001025418	8654.31	292.014	6.209693e+002	6.229182e+001	553	47	1.479826e+001	0	0	0	1	0	0	490.35	1	1	47.2035	47.3333
DATA	1352	16	77	0	0	A_64_P030824	ENSRNOT00000002002	8679.53	291.667	9.753080e+001	1.093333e+001	145	40	8.071591e+000	0	0	0	0	0	0	76.7414	1	1	46.1809	40.7667
DATA	1353	16	78	0	0	A_42_P537715	NM_001025743	8705.3	291.731	3.291882e+003	3.292255e+002	2662	42	7.921150e+000	0	0	0	0	0	0	2581.65	1	1	46.1809	41.7692
DATA	1354	16	79	0	0	A_44_P596424	TC642059	8730.67	292.167	5.726240e+002	5.747785e+001	521	41.5	1.006165e+001	0	0	0	0	0	0	447.775	1	1	47.8731	43.0667
DATA	1355	16	80	0	0	A_42_P528891	XM_001074805	8756.09	292.044	5.085458e+002	5.109838e+001	470	40	9.028679e+000	0	0	0	1	0	0	396.575	1	1	46.8651	41.2727
DATA	1356	16	81	0	0	A_64_P130516	A_64_P130516	8781.71	292.275	1.183121e+002	1.284341e+001	162	42	6.477508e+000	0	0	0	0	0	0	92.0425	1	1	46.8651	42.2647
DATA	1357	16	82	66	1	DarkCorner	DarkCorner	8806.47	292.441	5.029091e+000	5.007596e+000	57	39	7.055258e+000	0	0	0	0	0	0	-12.3336	0	0	46.5243	38.88
DATA	1358	16	83	66	1	DarkCorner	DarkCorner	8832.55	292.694	5.037862e+000	5.016330e+000	57	39	8.185527e+000	0	0	0	0	0	0	-9.75656	0	0	52.0157	38.1852
DATA	1359	16	84	66	1	DarkCorner	DarkCorner	8856.77	292.733	5.044517e+000	5.022956e+000	58	41	8.800499e+000	0	0	0	0	0	0	-10.3402	0	0	48.8603	41.4146
DATA	1360	16	85	66	1	DarkCorner	DarkCorner	8882.89	292.5	5.050058e+000	5.028474e+000	64	35	8.200784e+000	0	0	0	0	0	0	-6.44932	0	0	56.9804	35.8583
DATA	1361	17	1	66	1	DarkCorner	DarkCorner	6737.28	297.823	5.131787e+000	4.425546e+000	68	39	9.205955e+000	0	0	0	0	0	0	4.53898	1	0	49.1849	39.5878
DATA	1362	17	2	66	1	DarkCorner	DarkCorner	6762.6	297.93	4.394527e+000	4.375744e+000	61.5	43	7.788701e+000	0	0	0	0	0	0	-2.06573	0	0	50.1463	43.4286
DATA	1363	17	3	66	1	DarkCorner	DarkCorner	6788	298	4.374992e+000	4.356293e+000	60	45	9.324141e+000	0	0	0	0	0	0	-4.05469	0	0	54.9904	44.9804
DATA	1364	17	4	66	1	DarkCorner	DarkCorner	6813.5	298.352	4.355725e+000	4.337108e+000	59	43	9.739708e+000	0	0	0	0	0	0	-3.49651	0	0	57.5363	43.4762
DATA	1365	17	5	0	0	A_44_P434817	NM_001012187	6838.43	297.701	5.510954e+003	5.511123e+002	4879	44	7.156506e+000	0	0	0	0	0	0	4960.15	1	1	46.1809	44.4583
DATA	1366	17	6	0	0	A_64_P153319	A_64_P153319	6863.97	298.092	9.748228e+002	9.757714e+001	954	44.5	8.306305e+000	0	0	0	0	0	0	881.07	1	1	46.5243	43.5714
DATA	1367	17	7	0	0	A_64_P034394	XM_218828	6889.5	298.352	2.100573e+001	4.771581e+000	80	42.5	7.804744e+000	0	0	0	0	0	0	19.0621	1	0	57.5363	44.1071
DATA	1368	17	8	0	0	A_64_P001399	A_64_P001399	6914.6	298.271	1.514195e+004	1.514201e+003	13657	45	8.418641e+000	0	0	0	0	0	0	13792.7	1	1	47.2035	44.3478
DATA	1369	17	9	0	0	A_42_P712191	NM_001109207	6940.42	298.427	2.032447e+002	2.076452e+001	247.5	45	9.534511e+000	0	0	0	0	0	0	185.831	1	1	57.5363	44.3
DATA	1370	17	10	0	0	A_44_P746633	NM_001109580	6965.38	298.237	1.266688e+004	1.266695e+003	11393.5	43.5	6.573959e+000	0	0	0	0	0	0	11621.4	1	1	49.1849	43.5714
DATA	1371	17	11	0	0	A_42_P772157	NM_017020	6990.68	298.254	1.442559e+003	1.443177e+002	1349	50.5	1.175432e+001	0	0	0	0	0	0	1327.93	1	1	47.5395	47.6429
DATA	1372	17	12	0	0	A_44_P407543	NM_001024996	7016.2	298.239	2.454356e+002	2.490202e+001	293	43	9.346100e+000	0	0	0	0	0	0	226.657	1	1	46.8651	43.9429
DATA	1374	17	14	0	0	A_64_P057225	NM_001008857	7067.42	298.427	2.935691e+002	2.965374e+001	335	45	1.144178e+001	0	0	0	0	0	0	272.717	1	1	57.5363	46.4054
DATA	1375	17	15	0	0	A_42_P462015	NM_001011943	7092.25	298.288	4.863774e+002	4.881656e+001	525	42	9.537659e+000	0	0	0	0	0	0	452.992	1	1	48.2044	42.6786
DATA	1376	17	16	0	0	A_42_P596050	NM_053572	7117.96	298.164	3.295876e+002	3.322078e+001	383	44	9.250865e+000	0	0	0	1	0	0	307.724	1	1	46.8651	44.3871
DATA	1377	17	17	0	0	A_44_P213776	NM_052829	7143.18	298.361	3.264675e+002	3.291005e+001	363	45	9.601740e+000	0	0	0	0	0	0	305.503	1	1	47.8731	44.5588
DATA	1378	17	18	0	0	A_64_P004468	A_64_P004468	7168.94	298.495	7.091336e+003	7.091457e+002	6748	46	1.002439e+001	0	0	0	0	0	0	6649.96	1	1	54.7002	46.2353
DATA	1379	17	19	0	0	A_44_P290394	NM_053580	7194.2	298.518	3.356495e+003	3.356750e+002	3155	42	8.284801e+000	0	0	0	0	0	0	3153.41	1	1	51.7088	42.931
DATA	1380	17	20	0	0	A_64_P076911	XM_215948	7219.38	298.631	2.415596e+002	2.450673e+001	292	48	8.351278e+000	0	0	0	0	0	0	227.319	1	1	45.1352	46.3793
DATA	1381	17	21	0	0	A_64_P155895	NM_001009658	7244.89	298.091	3.019845e+003	3.020127e+002	2969	42	8.352065e+000	0	0	0	0	0	0	2845.76	1	1	46.1809	44.0968
DATA	1382	17	22	0	0	A_43_P16338	ENSRNOT00000034555	7270.41	298.294	1.379257e+002	1.439493e+001	192.5	40.5	8.151511e+000	0	0	0	0	0	0	130.138	1	1	46.8651	42.0333
DATA	1383	17	23	0	0	A_42_P716283	NM_001107983	7295.61	298.362	7.111566e+002	7.123469e+001	737.5	42.5	1.208025e+001	0	0	0	0	0	0	671.686	1	1	47.5395	43.3056
DATA	1384	17	24	0	0	A_43_P13355	NM_139082	7320.88	298.5	2.487707e+002	2.521479e+001	302.5	43	7.927508e+000	0	0	0	0	0	0	235.154	1	1	47.2035	43.4857
DATA	1385	17	25	0	0	A_64_P126065	NM_001005900	7346.37	298.373	1.216580e+002	1.284151e+001	181.5	40.5	8.945734e+000	0	0	0	0	0	0	115.065	1	1	48.8603	41.8846
DATA	1386	17	26	0	0	A_44_P838532	NM_001107144	7371.94	298.506	8.596692e+002	8.606507e+001	879	44	9.546153e+000	0	0	0	0	0	0	813.389	1	1	50.4627	42.9355
DATA	1387	17	27	0	0	A_42_P785861	NM_001009422	7397.11	298.352	2.474233e+003	2.474574e+002	2411	43	9.676991e+000	0	0	0	0	0	0	2341.32	1	1	47.8731	44.0313
DATA	1388	17	28	0	0	A_42_P641962	NM_012999	7422.51	298.662	4.344435e+003	4.344630e+002	4212	42	8.089038e+000	0	0	0	0	0	0	4110.89	1	1	47.8731	43.1071
DATA	1389	17	29	0	0	A_64_P085201	TC633318	7448.42	298.573	1.559404e+002	1.612659e+001	211	44.5	7.812917e+000	0	0	0	0	0	0	147.511	1	1	57.5363	44.5417
DATA	1390	17	30	0	0	A_64_P015687	NM_053573	7473.18	298.361	7.733291e+003	7.733400e+002	7210	45	6.264982e+000	0	0	0	0	0	0	7311.4	1	1	47.8731	45
DATA	1391	17	31	0	0	A_64_P078332	NM_012794	7498.81	298.548	1.494296e+003	1.494863e+002	1470	41.5	9.005745e+000	0	0	0	0	0	0	1411.75	1	1	48.2044	42
DATA	1392	17	32	0	0	A_42_P637189	NM_031612	7523.99	298.384	1.019551e+004	1.019559e+003	9221	41	1.233167e+001	0	0	0	0	0	0	9623.05	1	1	48.8603	44.8485
DATA	1393	17	33	0	0	A_42_P602472	NM_001008290	7549.37	298.5	3.279436e+003	3.279695e+002	3222	38	1.024757e+001	0	0	0	0	0	0	3091.72	1	1	47.8731	41.5667
DATA	1394	17	34	0	0	A_64_P003749	NM_031799	7575.42	298.573	1.221113e+002	1.289058e+001	182	37.5	8.036073e+000	0	0	0	0	0	0	114.959	1	1	57.5363	40.5385
DATA	1395	17	35	0	0	A_42_P785861	NM_001009422	7600.12	298.616	2.979208e+003	2.979495e+002	2787.5	39	7.457136e+000	0	0	0	0	0	0	2800.36	1	1	48.5334	39.9375
DATA	1396	17	36	0	0	A_64_P138889	NM_001013050	7625.82	298.589	3.701688e+003	3.701920e+002	3519.5	43	9.281387e+000	0	0	0	0	0	0	3473.09	1	1	52.6241	43.4595
DATA	1397	17	37	0	0	A_44_P409820	NM_012908	7651.42	298.573	4.235428e+001	5.931285e+000	106	44.5	9.662813e+000	0	0	0	0	0	0	39.6578	1	1	57.5363	45.2813
DATA	1398	17	38	0	0	A_44_P529880	ENSRNOT00000033370	7676.58	298.573	4.179280e+000	4.161834e+000	68	45	8.801030e+000	0	0	0	0	0	0	0.550069	0	0	65	43.6207
DATA	1399	17	39	0	0	A_64_P084851	ENSRNOT00000029593	7701.97	298.896	2.284365e+002	2.322139e+001	275	43.5	8.517460e+000	0	0	0	0	0	0	212.915	1	1	46.8651	42.7333
DATA	1400	17	40	0	0	A_44_P654068	NM_001114402	7727.55	298.712	6.173559e+002	6.187711e+001	601	44	1.096720e+001	0	0	0	0	0	0	573.88	1	1	50.7771	44.7097
DATA	1401	17	41	0	0	A_64_P094855	NM_001109591	7752.94	298.768	2.824984e+003	2.825296e+002	2727	48.5	1.045139e+001	0	0	0	0	0	0	2618.69	1	1	46.5243	46.75
DATA	1402	17	42	0	0	A_42_P516658	NM_001024888	7778.03	299.134	5.464659e+002	5.480825e+001	572.5	46	1.064363e+001	0	0	0	0	0	0	505.084	1	1	46.8651	43.8649
DATA	1403	17	43	0	0	A_64_P092394	ENSRNOT00000064749	7803.79	299.104	2.396462e+001	4.853025e+000	88	45	9.542404e+000	0	0	0	0	0	0	22.0785	1	1	46.1809	44.3333
DATA	1404	17	44	0	0	A_44_P280755	NM_148890	7829.09	298.935	7.469184e+001	8.585903e+000	137	43	1.012248e+001	0	0	0	0	0	0	68.5822	1	1	54.4085	44.7419
DATA	1405	17	45	0	0	A_42_P629062	AF072835	7854.22	298.75	1.123558e+003	1.124361e+002	1083	41	8.832619e+000	0	0	0	0	0	0	1028.04	1	1	45.1352	41.5
DATA	1406	17	46	0	0	A_64_P131141	ENSRNOT00000012638	7879.79	298.955	6.360663e+001	7.658134e+000	124	44	8.246384e+000	0	0	0	0	0	0	57.9849	1	1	45.835	44.1852
DATA	1407	17	47	0	0	A_42_P756350	NM_021772	7905.21	298.956	1.866186e+002	1.914666e+001	231.5	44	1.003772e+001	0	0	0	1	0	0	169.471	1	1	46.5243	45.8235
DATA	1408	17	48	66	-1	(-)3xSLv1	NegativeControl	7930.5	299	4.316804e+000	4.298354e+000	62.5	44.5	9.194014e+000	0	0	0	0	0	0	-5.30498	0	0	54.1152	45.7667
DATA	1409	17	49	0	0	A_64_P124796	A_64_P124796	7956	299	3.601541e+001	5.621490e+000	99	43	1.105770e+001	0	0	0	0	0	0	32.4413	1	1	65	44.0909
DATA	1410	17	50	0	0	A_44_P288443	NM_001108878	7981.43	299.013	5.388258e+002	5.405666e+001	549	44	1.211491e+001	0	0	0	0	0	0	483.282	1	1	49.1849	45.3235
DATA	1411	17	51	0	0	A_42_P748004	NM_001135873	8006.7	299.1	2.118504e+003	2.118951e+002	1908	48	8.960655e+000	0	0	0	0	0	0	1891.84	1	1	47.2035	48.72
DATA	1412	17	52	0	0	A_64_P067310	NM_001139507	8032.09	299.104	2.248716e+003	2.249142e+002	2103	46.5	1.001405e+001	0	0	0	0	0	0	1999.07	1	1	46.8651	46.0938
DATA	1413	17	53	0	0	A_44_P210809	NM_001107334	8057.5	299	4.707114e+002	4.727576e+001	470	41	9.861229e+000	0	0	0	0	0	0	416.515	1	1	54.1152	43.6207
DATA	1414	17	54	1028	1	(+)E1A_r60_a104	E1A_r60_a104	8083	299	4.433668e+000	4.414718e+000	60	45	9.547085e+000	0	0	0	0	0	0	-5.99417	0	0	54.9904	46.5357
DATA	1415	17	55	0	0	A_44_P1042711	NM_001108426	8108.3	298.864	9.272098e+001	1.027864e+001	149	41	8.941104e+000	0	0	0	0	0	0	81.264	1	1	45.835	43.12
DATA	1416	17	56	0	0	A_42_P661992	TC596141	8133.61	299.069	3.318712e+002	3.348515e+001	360	47	8.617335e+000	0	0	0	0	0	0	289.456	1	1	53.8203	47.4615
DATA	1417	17	57	0	0	A_42_P565621	NM_001105971	8159.42	299.427	2.204740e+002	2.249795e+001	259	44	1.015609e+001	0	0	0	0	0	0	191.337	1	1	57.5363	45.1714
DATA	1418	17	58	0	0	A_44_P264600	NM_001013132	8184.42	298.957	1.181614e+002	1.264491e+001	171	49	9.699656e+000	0	0	0	0	0	0	102.032	1	1	46.8651	47.4
DATA	1419	17	59	0	0	A_64_P034901	TC591400	8210	299.455	1.493742e+001	4.765407e+000	81	45.5	8.447394e+000	0	0	0	0	0	0	12.8337	1	0	55.8519	44.8929
DATA	1420	17	60	0	0	A_42_P468216	NM_001030026	8235.11	299.153	3.682049e+003	3.682330e+002	3197	42	6.305833e+000	0	0	0	1	0	0	3147.37	1	1	46.8651	41.9259
DATA	1421	17	61	0	0	A_64_P062855	XM_343708	8260.58	299.427	3.464063e+001	5.735856e+000	98	45	9.066051e+000	0	0	0	0	0	0	29.4595	1	1	65	43.5714
DATA	1422	17	62	0	0	A_64_P048421	AABR03055399	8286.42	299.427	4.615421e+000	4.595694e+000	63	40	7.065492e+000	0	0	0	0	0	0	-3.68401	0	0	57.5363	39.7241
DATA	1423	17	63	0	0	A_44_P342166	NM_013187	8311.48	299.113	3.425947e+002	3.456949e+001	358.5	42.5	6.546032e+000	0	0	0	1	0	0	288.348	1	1	47.8731	41.4643
DATA	1424	17	64	0	0	A_42_P748154	XM_001059949	8336.84	298.776	3.552340e+003	3.552644e+002	3103	44	1.126761e+001	0	0	0	1	0	0	2974.4	1	1	46.1809	45.3226
DATA	1425	17	65	0	0	A_64_P157763	A_64_P157763	8361.86	298.943	1.164074e+003	1.165009e+002	974.5	43	8.891553e+000	0	0	0	0	0	0	969.821	1	1	46.8651	42.9706
DATA	1426	17	66	0	0	A_64_P155645	NM_022706	8387.63	299.127	2.006325e+004	2.006331e+003	16258	42	9.948513e+000	0	0	0	0	0	0	16630	1	1	47.5395	40.4828
DATA	1427	17	67	0	0	A_42_P622436	NM_022298	8413.33	299.5	1.003735e+005	1.003735e+004	83134	44	9.778457e+000	0	0	0	0	0	0	82781.8	1	1	57.5363	44.2414
DATA	1428	17	68	0	0	A_44_P304190	NM_001014044	8438.46	299.412	2.860232e+002	2.899197e+001	301.5	45.5	8.619760e+000	0	0	0	0	0	0	234.74	1	1	46.8651	45.6786
DATA	1429	17	69	1028	1	(+)E1A_r60_a104	E1A_r60_a104	8464.2	299.32	4.781211e+000	4.760776e+000	67	41.5	6.356274e+000	0	0	0	0	0	0	-4.53723	0	0	49.5074	40.7188
DATA	1430	17	70	0	0	A_42_P771373	NM_012614	8489.06	299.232	9.664146e+003	9.664265e+002	7728	43	8.717675e+000	0	0	0	1	0	0	7855.47	1	1	46.5243	43.2581
DATA	1431	17	71	0	0	A_64_P101976	A_64_P101976	8514.51	299.928	3.372769e+001	5.870379e+000	96	45	9.017426e+000	0	0	0	0	0	0	27.2917	1	1	50.4627	45.7742
DATA	1432	17	72	0	0	A_42_P777935	ENSRNOT00000027369	8539.94	299.648	3.056949e+002	3.094821e+001	315.5	43	8.488620e+000	0	0	0	0	0	0	246.233	1	1	47.5395	43.16
DATA	1433	17	73	0	0	A_64_P041521	NM_012945	8565.63	299.36	2.266144e+002	2.317429e+001	246	44	1.073978e+001	0	0	0	0	0	0	181.72	1	1	48.8603	45.9697
DATA	1434	17	74	0	0	A_44_P102661	NM_138862	8590.59	299.28	1.829888e+003	1.830536e+002	1520	50	1.161584e+001	0	0	0	0	0	0	1461.3	1	1	48.8603	50.1143
DATA	1435	17	75	0	0	A_42_P714166	NM_001017491	8616.33	299.5	4.909217e+000	4.888235e+000	68	46	1.116070e+001	0	0	0	0	0	0	-0.209216	0	0	65	46.1935
DATA	1436	17	76	0	0	A_64_P098703	NM_198728	8641.61	299.594	1.222745e+003	1.223729e+002	1041	47	1.531790e+001	0	0	0	0	0	0	968.853	1	1	47.5395	47.2941
DATA	1437	17	77	0	0	A_44_P624151	NM_001107932	8667.1	299.066	7.255050e+002	7.271747e+001	632	49	1.518861e+001	0	0	0	0	0	0	572.721	1	1	44.7812	50.6098
DATA	1438	17	78	0	0	A_42_P674843	NM_001008880	8692.5	299.5	1.869899e+003	1.870551e+002	1536.5	42	8.217517e+000	0	0	0	0	0	0	1471.29	1	1	57.5363	42.3
DATA	1439	17	79	0	0	A_44_P1039634	NM_001108924	8717.67	299.5	1.164100e+002	1.265228e+001	163	42	7.751344e+000	0	0	0	0	0	0	91.3123	1	1	57.5363	41.4
DATA	1440	17	80	0	0	A_42_P517253	NM_001012275	8743.17	299.656	8.058367e+002	8.073682e+001	681.5	41	1.073753e+001	0	0	0	0	0	0	630.32	1	1	45.4864	42.1935
DATA	1441	17	81	0	0	A_42_P485589	NM_017246	8768.63	299.444	3.528049e+002	3.563072e+001	343.5	42	5.902433e+000	0	0	0	0	0	0	275.244	1	1	48.2044	41.75
DATA	1442	17	82	66	1	DarkCorner	DarkCorner	8794	299.545	5.015968e+000	4.994529e+000	59.5	41	9.384767e+000	0	0	0	0	0	0	-10.4033	0	0	65	42.9231
DATA	1443	17	83	66	1	DarkCorner	DarkCorner	8819.4	300.181	5.024798e+000	5.003322e+000	60	40	5.976450e+000	0	0	0	0	0	0	-8.49574	0	0	47.8731	40.4444
DATA	1444	17	84	66	1	DarkCorner	DarkCorner	8845.05	299.716	5.033215e+000	5.011703e+000	63	40	9.343016e+000	0	0	0	0	0	0	-9.09143	0	0	54.4085	40.8667
DATA	1445	17	85	66	1	DarkCorner	DarkCorner	8870.99	299.639	5.039330e+000	5.017791e+000	59	40	9.456668e+000	0	0	0	0	0	0	-9.28952	0	0	48.2044	39.6
DATA	1446	18	1	66	1	DarkCorner	DarkCorner	6749.21	305.302	4.399007e+000	4.390956e+000	66	43	8.102881e+000	0	0	0	0	0	0	2.7256	0	0	45.1352	42.5345
DATA	1447	18	2	66	1	DarkCorner	DarkCorner	6775.23	305.387	4.378909e+000	4.360194e+000	60	43	8.913203e+000	0	0	0	0	0	0	-2.52887	0	0	49.1849	43.4651
DATA	1448	18	3	66	1	DarkCorner	DarkCorner	6800.99	305.149	4.359805e+000	4.341171e+000	58.5	44	1.000288e+001	0	0	0	0	0	0	-4.1914	0	0	47.2035	44.8837
DATA	1449	18	4	0	0	A_42_P608713	TC595074	6826.11	305.5	9.420919e+002	9.430831e+001	911.5	38	8.195962e+000	0	0	0	0	0	0	847.328	1	1	56.9804	39.5926
DATA	1450	18	5	0	0	A_44_P411771	XM_001056376	6851.01	305.333	5.450254e+002	5.467233e+001	540	45	8.770184e+000	0	0	0	0	0	0	492.175	1	1	46.5243	43.871
DATA	1451	18	6	0	0	A_42_P703647	NM_001108688	6876.67	305.5	1.954793e+001	4.712498e+000	80	44	7.212880e+000	0	0	0	0	0	0	17.7243	1	0	57.5363	44.1111
DATA	1452	18	7	0	0	A_64_P139212	NM_001030052	6901.89	305.423	2.406001e+004	2.406005e+003	22289	44	7.775379e+000	0	0	0	0	0	0	21899	1	1	47.8731	44.75
DATA	1453	18	8	0	0	A_64_P082461	FQ211879	6927.22	305.459	2.772825e+002	2.805294e+001	310	45	9.055131e+000	0	0	0	0	0	0	253.317	1	1	48.8603	44.2667
DATA	1454	18	9	0	0	A_64_P144053	NM_001108100	6953	305.545	4.555587e+002	4.575278e+001	463	43.5	6.906299e+000	0	0	0	0	0	0	417.701	1	1	55.8519	43
DATA	1455	18	10	0	0	A_42_P455802	NM_001013929	6978.19	305.519	5.386242e+003	5.386408e+002	4869	46	1.071346e+001	0	0	0	0	0	0	4955.35	1	1	49.8279	45.7241
DATA	1456	18	11	0	0	A_44_P575367	ENSRNOT00000068160	7003.58	305.573	1.032404e+001	4.336932e+000	72.5	43	9.756144e+000	0	0	0	0	0	0	9.52909	1	0	65	43.4815
DATA	1457	18	12	0	0	A_64_P008259	ENSRNOT00000040453	7029.07	305.402	3.247590e+003	3.247862e+002	3110	43.5	9.385357e+000	0	0	0	0	0	0	3006.73	1	1	51.0895	44.0278
DATA	1458	18	13	0	0	A_44_P433935	NM_001024894	7054.21	305.387	1.269652e+001	4.375592e+000	76	42	1.005422e+001	0	0	0	0	0	0	11.7886	1	0	44.0646	44.0286
DATA	1459	18	14	0	0	A_64_P027747	TC585156	7079.66	305	7.376101e+003	7.376219e+002	6869	43	1.027990e+001	0	0	0	0	0	0	6867.01	1	1	45.4864	43.5313
DATA	1460	18	15	0	0	A_44_P247880	ENSRNOT00000032333	7105.42	305.573	1.522886e+001	4.434800e+000	78	44	1.026624e+001	0	0	0	0	0	0	14.2153	1	0	57.5363	44.0645
DATA	1461	18	16	0	0	A_44_P422321	NM_001105813	7130.57	305.392	2.333879e+003	2.334249e+002	2198.5	42	8.668193e+000	0	0	0	0	0	0	2183.55	1	1	49.1849	44.2143
DATA	1462	18	17	0	0	A_44_P374824	ENSRNOT00000025777	7156.42	305.573	4.047776e+001	5.794598e+000	100	46	1.109304e+001	0	0	0	0	0	0	37.9541	1	1	57.5363	46.9429
DATA	1463	18	18	0	0	A_64_P029482	A_64_P029482	7181.5	305.648	7.034448e+001	8.161505e+000	126.5	45	9.789978e+000	0	0	0	0	0	0	66.086	1	1	57.5363	46.8667
DATA	1464	18	19	0	0	A_64_P083918	NM_053396	7206.91	305.614	2.764213e+001	4.970731e+000	89	47.5	8.779434e+000	0	0	0	0	0	0	26.0139	1	1	57.259	44.0385
DATA	1465	18	20	1028	1	(+)E1A_r60_3	E1A_r60_3	7232.17	305.847	3.041234e+001	5.124790e+000	96	47	7.949918e+000	0	0	0	0	0	0	28.6654	1	1	47.5395	45.5135
DATA	1466	18	21	0	0	A_42_P508415	CV108834	7257.41	305.568	2.875828e+002	2.905184e+001	341	42.5	7.428083e+000	0	0	0	0	0	0	271.412	1	1	49.1849	43.7188
DATA	1467	18	22	0	0	A_64_P018331	NM_001107720	7282.94	305.765	3.086328e+003	3.086602e+002	2940	44	1.099295e+001	0	0	0	0	0	0	2916.12	1	1	46.1809	43.5789
DATA	1468	18	23	0	0	A_64_P142056	NM_001011938	7308.26	305.647	9.221911e+003	9.222003e+002	8753.5	44	1.008716e+001	0	0	0	0	0	0	8721.03	1	1	46.1809	43.8378
DATA	1469	18	24	0	0	A_44_P1030098	NM_001105866	7333.91	305.935	2.073120e+002	2.113434e+001	264	40	9.113863e+000	0	0	0	0	0	0	196.194	1	1	54.4085	41
DATA	1470	18	25	0	0	A_64_P125958	NM_177933	7359.13	305.603	9.138942e+001	1.001916e+001	151	43.5	9.625602e+000	0	0	0	0	0	0	86.5248	1	1	46.1809	41.8438
DATA	1471	18	26	0	0	A_64_P002066	XM_001056138	7384.79	306.106	7.531261e+001	8.577470e+000	135	43.5	1.037910e+001	0	0	0	0	0	0	71.3254	1	1	45.835	43.625
DATA	1472	18	27	0	0	A_42_P521242	ENSRNOT00000003841	7409.91	305.896	1.367859e+003	1.368475e+002	1368	43	6.584364e+000	0	0	0	0	0	0	1295.45	1	1	46.8651	42.9231
DATA	1473	18	28	0	0	A_42_P652827	NM_001024274	7435	305.797	4.317440e+003	4.317636e+002	4032	41.5	7.135870e+000	0	0	0	0	0	0	4088.07	1	1	46.8651	42.5714
DATA	1474	18	29	0	0	A_42_P533792	NM_001106575	7460.54	305.667	1.297881e+004	1.297887e+003	12097	44	8.118829e+000	0	0	0	0	0	0	12284.1	1	1	46.8651	43.6538
DATA	1475	18	30	1028	1	(+)E1A_r60_1	E1A_r60_1	7486.48	305.938	4.127958e+000	4.110315e+000	66	45	6.785401e+000	0	0	0	0	0	0	-1.82201	0	0	44.4243	44.9583
DATA	1476	18	31	0	0	A_64_P210103	NM_001100666	7511.5	306	1.756425e+002	1.803956e+001	230	41	1.093521e+001	0	0	0	0	0	0	166.001	1	1	54.1152	44.3103
DATA	1477	18	32	0	0	A_64_P131745	A_64_P131745	7537	306	6.665539e+001	7.835069e+000	130.5	42.5	1.267569e+001	0	0	0	0	0	0	62.9293	1	1	54.9904	45.1111
DATA	1478	18	33	0	0	A_64_P017791	XM_002727063	7562.37	305.71	4.141213e+000	4.141228e+000	69	38	6.623169e+000	0	0	0	0	0	0	3.60771	0	0	44.4243	39.5405
DATA	1479	18	34	0	0	A_42_P560288	NM_198788	7587.63	306	1.602632e+004	1.602637e+003	15114	36	7.238636e+000	0	0	0	0	0	0	15088.7	1	1	50.4627	38.2581
DATA	1480	18	35	0	0	A_42_P571463	NM_001013221	7612.81	306.086	1.981183e+003	1.981615e+002	1992	43	8.305963e+000	0	0	0	0	0	0	1862.15	1	1	46.8651	43.2439
DATA	1481	18	36	0	0	A_42_P648207	NM_001013882	7638.5	306.352	1.021559e+003	1.022399e+002	1015	43	9.416774e+000	0	0	0	0	0	0	958.361	1	1	57.5363	44.8286
DATA	1482	18	37	0	0	A_64_P120833	NM_131910	7663.83	305.677	1.588663e+004	1.588669e+003	14488	41	8.936282e+000	0	0	0	0	0	0	14871.3	1	1	45.4864	43
DATA	1483	18	38	0	0	A_42_P705337	TC582694	7689.27	305.643	5.921501e+003	5.921647e+002	5627	44	9.368089e+000	0	0	0	0	0	0	5530.19	1	1	46.8651	42.2414
DATA	1484	18	39	0	0	A_44_P544340	NM_001034939	7714.59	305.794	5.938659e+002	5.953305e+001	621	44.5	8.744159e+000	0	0	0	0	0	0	553.244	1	1	46.5243	44.3571
DATA	1486	18	41	0	0	A_44_P310596	NM_001014166	7765.37	305.735	1.184962e+003	1.185705e+002	1158	46	1.010719e+001	0	0	0	0	0	0	1097.74	1	1	46.5243	44.9697
DATA	1487	18	42	0	0	A_64_P013409	A_64_P013409	7791	306.455	4.227618e+000	4.209549e+000	67.5	46	1.073348e+001	0	0	0	0	0	0	-0.235036	0	0	55.8519	43.85
DATA	1488	18	43	0	0	A_64_P076485	A_64_P076485	7816.28	305.875	3.495222e+003	3.495477e+002	3322	44	9.791166e+000	0	0	0	0	0	0	3217.5	1	1	45.4864	45.5625
DATA	1489	18	44	0	0	A_64_P096121	ENSRNOT00000028891	7841.58	306.427	1.422174e+002	1.483967e+001	203.5	42	7.608748e+000	0	0	0	0	0	0	130.479	1	1	57.5363	40.4706
DATA	1490	18	45	0	0	A_42_P521086	NM_001100857	7867.25	305.71	1.583048e+002	1.639196e+001	216	44	1.052943e+001	0	0	0	0	0	0	144.699	1	1	46.8651	44.1143
DATA	1491	18	46	0	0	A_64_P143133	TC637520	7892.23	305.712	1.404270e+002	1.467732e+001	199	41.5	9.883631e+000	0	0	0	0	0	0	127.885	1	1	45.4864	43.6154
DATA	1492	18	47	0	0	A_64_P067163	NM_017248	7918	306.455	5.617024e+004	5.617026e+003	49570	47	8.042430e+000	0	0	0	0	0	0	50955.7	1	1	55.8519	47.2857
DATA	1493	18	48	0	0	A_64_P118288	NM_053448	7943	305.774	8.698109e+002	8.708748e+001	844	43.5	7.613390e+000	0	0	0	0	0	0	785.851	1	1	45.4864	44.1875
DATA	1494	18	49	0	0	A_64_P112342	A_64_P112342	7968.58	306.427	6.110566e+001	7.484069e+000	124	43	9.039886e+000	0	0	0	0	0	0	54.9793	1	1	57.5363	42.9333
DATA	1495	18	50	0	0	A_64_P074741	NM_001077680	7994.33	306.5	5.973364e+001	7.383591e+000	124.5	44.5	9.453187e+000	0	0	0	0	0	0	53.5103	1	1	57.5363	45.0294
DATA	1496	18	51	0	0	A_64_P153062	NM_001107890	8019.4	306.178	3.006338e+002	3.037780e+001	338	47	6.380553e+000	0	0	0	0	0	0	268.122	1	1	48.5334	47.4348
DATA	1497	18	52	0	0	A_64_P051942	A_64_P051942	8044.89	306.5	4.413498e+002	4.435171e+001	467	44.5	1.104778e+001	0	0	0	0	0	0	391.84	1	1	56.9804	46.6471
DATA	1498	18	53	0	0	A_44_P233080	ENSRNOT00000026303	8070.06	305.825	1.434385e+004	1.434392e+003	12704.5	45	9.872536e+000	0	0	0	0	0	0	12674.9	1	1	45.4864	45.2432
DATA	1499	18	54	0	0	A_64_P127747	A_64_P127747	8095.5	305.821	2.542875e+002	2.581018e+001	287	43	8.881299e+000	0	0	0	0	0	0	223.632	1	1	42.9674	42.8261
DATA	1500	18	55	0	0	A_42_P773155	NM_001106996	8121.11	306.5	6.667480e+004	6.667481e+003	58299	50	7.549457e+000	0	0	0	0	0	0	58356.9	1	1	56.9804	48.0741
DATA	1501	18	56	0	0	A_64_P003624	NM_175591	8146.5	306.5	6.242791e+001	7.674595e+000	123.5	45.5	9.319301e+000	0	0	0	0	0	0	54.3719	1	1	57.5363	45.3824
DATA	1502	18	57	0	0	A_64_P148728	NM_030989	8171.89	306.5	3.806363e+002	3.832709e+001	397	43.5	9.762466e+000	0	0	0	0	0	0	329.87	1	1	56.9804	44.2667
DATA	1503	18	58	0	0	A_44_P436284	ENSRNOT00000031389	8197.42	306.573	5.594204e+002	5.612345e+001	553	43	8.954804e+000	0	0	0	0	0	0	482.369	1	1	57.5363	44.1333
DATA	1504	18	59	0	0	A_42_P626851	NM_001107917	8222.48	306.151	1.450767e+003	1.451475e+002	1331	44	6.035141e+000	0	0	0	0	0	0	1244.62	1	1	47.8731	43.8261
DATA	1505	18	60	0	0	A_42_P797303	TC587453	8247.79	306.301	1.644910e+004	1.644917e+003	13867	42	8.015044e+000	0	0	0	1	0	0	14040.4	1	1	48.2044	42.7813
DATA	1506	18	61	0	0	A_64_P096312	A_64_P096312	8273.16	306.158	5.739818e+003	5.740000e+002	5172	44.5	9.147599e+000	0	0	0	0	0	0	4874.19	1	1	42.9674	42.75
DATA	1507	18	62	0	0	A_64_P150894	A_64_P150894	8298.66	306.125	5.944105e+002	5.961893e+001	556.5	42	5.523992e+000	0	0	0	0	0	0	502.171	1	1	45.1352	41.4167
DATA	1508	18	63	0	0	A_64_P241372	NM_001000593	8324.42	306.573	2.949746e+001	5.486159e+000	93	44	8.981990e+000	0	0	0	0	0	0	24.7928	1	1	57.5363	44.3636
DATA	1509	18	64	0	0	A_44_P433621	NM_001025016	8349.59	306.329	5.528464e+002	5.547979e+001	529	41	9.006211e+000	0	0	0	0	0	0	462.308	1	1	47.8731	42.6129
DATA	1510	18	65	0	0	A_64_P163511	NM_013190	8375	306.545	1.841781e+003	1.842374e+002	1620	42	1.005357e+001	0	0	0	0	0	0	1532.42	1	1	55.8519	42.95
DATA	1511	18	66	0	0	A_44_P129412	AF155959	8400.42	306.573	1.714528e+003	1.715171e+002	1467.5	40	8.264577e+000	0	0	0	0	0	0	1419.4	1	1	57.5363	39.6452
DATA	1512	18	67	0	0	A_64_P143037	NM_001025134	8425.58	306.573	6.710837e+002	6.727411e+001	619.5	43	8.891915e+000	0	0	0	0	0	0	552.847	1	1	57.5363	43.1154
DATA	1513	18	68	0	0	A_64_P032693	XM_002724830	8451.02	306.35	2.972422e+001	5.597218e+000	93	44	1.061963e+001	0	0	0	0	0	0	24.3668	1	1	44.0646	44.4
DATA	1514	18	69	0	0	A_42_P727368	NM_001025693	8476.56	306.307	1.623498e+002	1.691999e+001	198	41	8.182397e+000	0	0	0	1	0	0	132.448	1	1	49.1849	41.875
DATA	1515	18	70	0	0	A_64_P075765	A_64_P075765	8502	306.545	3.419142e+001	5.883379e+000	97	42	7.821943e+000	0	0	0	0	0	0	27.7647	1	1	65	41.129
DATA	1516	18	71	0	0	A_42_P639174	NM_001106592	8527.29	306.147	2.265601e+003	2.266112e+002	1813	44.5	8.420579e+000	0	0	0	0	0	0	1831.28	1	1	45.835	44.8846
DATA	1517	18	72	0	0	A_64_P063135	NM_001109623	8552.93	306.404	9.533654e+001	1.068793e+001	144.5	43	1.280913e+001	0	0	0	0	0	0	76.721	1	1	42.9674	46.9231
DATA	1518	18	73	0	0	A_64_P018236	NM_001108882	8578.42	306.573	4.872641e+000	4.868096e+000	73	49	1.004193e+001	0	0	0	0	0	0	3.18778	0	0	65	49.5714
DATA	1519	18	74	0	0	A_43_P14648	NM_001012034	8603.89	306.539	1.548440e+003	1.549206e+002	1278	49	1.034871e+001	0	0	0	0	0	0	1235.73	1	1	49.1849	49.5313
DATA	1520	18	75	0	0	A_42_P698520	NM_001108216	8629.09	306.918	1.114286e+004	1.114297e+003	8756	50	1.196024e+001	0	0	0	1	0	0	8858.91	1	1	51.0895	49.2258
DATA	1521	18	76	0	0	A_43_P19450	NM_001105713	8654.2	307.043	2.760974e+002	2.804259e+001	291.5	56	1.636436e+001	0	0	0	0	0	0	218.712	1	1	46.8651	55.05
DATA	1522	18	77	0	0	A_64_P013012	XM_225619	8680	307	5.475887e+002	5.497993e+001	509	48	1.551874e+001	0	0	0	0	0	0	432.249	1	1	46.8651	51.9211
DATA	1523	18	78	0	0	A_42_P499684	NM_001108642	8705.36	306.837	6.709964e+002	6.728134e+001	604	42	6.947385e+000	0	0	0	1	0	0	527.946	1	1	49.5074	42.1154
DATA	1524	18	79	0	0	A_64_P297479	ENSRNOT00000044350	8730.58	306.985	3.422334e+004	3.422338e+003	27171	43	1.183635e+001	0	0	0	0	0	0	26849.2	1	1	45.1352	45.1071
DATA	1525	18	80	0	0	A_64_P103238	NM_001014158	8756.09	306.896	5.258707e+002	5.282132e+001	476	43.5	8.533919e+000	0	0	0	0	0	0	411.447	1	1	46.8651	42.9722
DATA	1526	18	81	0	0	A_42_P751562	NM_001037355	8781.23	306.884	6.933487e+003	6.933666e+002	5505.5	42	6.249233e+000	0	0	0	1	0	0	5412.11	1	1	46.5243	42.6429
DATA	1527	18	82	66	1	DarkCorner	DarkCorner	8806.5	307	5.012301e+000	4.990878e+000	59	41	9.288613e+000	0	0	0	0	0	0	-10.3332	0	0	65	42.2759
DATA	1528	18	83	66	1	DarkCorner	DarkCorner	8832.29	307.038	5.020952e+000	4.999492e+000	62	39.5	7.312388e+000	0	0	0	0	0	0	-7.15424	0	0	40.6843	39.5833
DATA	1529	18	84	66	1	DarkCorner	DarkCorner	8857.5	307	5.027693e+000	5.006205e+000	58	41	1.057361e+001	0	0	0	0	0	0	-9.92283	0	0	54.1152	42.7317
DATA	1530	18	85	66	1	DarkCorner	DarkCorner	8883.29	306.776	5.032851e+000	5.011340e+000	58	36	8.800485e+000	0	0	0	0	0	0	-9.60873	0	0	48.8603	36.6026
DATA	1531	19	1	66	1	DarkCorner	DarkCorner	6737.42	312.573	4.402268e+000	4.383600e+000	63	40	9.411255e+000	0	0	0	0	0	0	0.319502	0	0	57.5363	40.5289
DATA	1532	19	2	66	1	DarkCorner	DarkCorner	6763.07	312.61	4.382455e+000	4.363724e+000	61	42	7.781146e+000	0	0	0	0	0	0	-0.404444	0	0	50.7771	42.3158
DATA	1533	19	3	66	1	DarkCorner	DarkCorner	6788	313.254	4.363228e+000	4.344580e+000	59	43	9.892955e+000	0	0	0	0	0	0	-1.63629	0	0	45.4864	43.7917
DATA	1534	19	4	66	1	DarkCorner	DarkCorner	6813.23	311.922	4.345792e+000	4.327218e+000	59	39	8.698985e+000	0	0	0	0	0	0	-3.07225	0	0	45.4864	40.7879
DATA	1535	19	5	0	0	A_44_P198705	NM_012578	6838.44	312.466	1.603128e+004	1.603134e+003	14357.5	41	8.715020e+000	0	0	0	0	0	0	14464.6	1	1	49.1849	42.5185
DATA	1536	19	6	0	0	A_42_P604252	NM_001108797	6863.89	312.648	1.100387e+003	1.101224e+002	1044.5	45	8.773126e+000	0	0	0	0	0	0	996.895	1	1	47.8731	44.5
DATA	1537	19	7	0	0	A_43_P20016	NM_001107377	6889.5	312.648	2.572694e+002	2.607965e+001	300	44	8.877242e+000	0	0	0	0	0	0	233.991	1	1	57.5363	44.6552
DATA	1538	19	8	0	0	A_42_P491486	NM_022533	6914.63	312.873	6.157381e+003	6.157528e+002	5518	45	9.030033e+000	0	0	0	0	0	0	5621.32	1	1	47.5395	44.7826
DATA	1539	19	9	0	0	A_64_P345929	NM_001191639	6940.58	313.231	3.346193e+001	5.403509e+000	97	45	8.913197e+000	0	0	0	0	0	0	30.6634	1	1	45.4864	44.1515
DATA	1540	19	10	0	0	A_64_P152047	NM_001000521	6965.86	313.15	7.853586e+000	4.300534e+000	71	42	8.740249e+000	0	0	0	0	0	0	7.2215	1	0	49.8279	43.5667
DATA	1541	19	11	0	0	A_42_P724510	NM_001007625	6990.8	313	1.586006e+004	1.586012e+003	14208	47	1.065907e+001	0	0	0	1	0	0	14630.6	1	1	49.1849	45.5172
DATA	1542	19	12	0	0	A_42_P552906	NM_001007701	7016.31	312.986	5.979175e+003	5.979323e+002	5476	42.5	1.031811e+001	0	0	0	0	0	0	5533.09	1	1	47.2035	44.7778
DATA	1543	19	13	0	0	A_64_P121673	A_64_P121673	7041.2	313.345	1.122735e+001	4.336809e+000	75	43	9.806789e+000	0	0	0	0	0	0	10.4205	1	0	41.8414	44.0571
DATA	1544	19	14	0	0	A_64_P047470	NM_001008875	7067.08	312.901	6.139584e+001	7.425929e+000	120.5	40.5	7.937881e+000	0	0	0	0	0	0	57.1424	1	1	46.8651	40.2632
DATA	1545	19	15	0	0	A_43_P14911	NM_031512	7092.43	313.147	1.475357e+002	1.533056e+001	201	44	8.352798e+000	0	0	0	0	0	0	137.677	1	1	47.2035	44.3333
DATA	1546	19	16	0	0	A_44_P117234	NM_001191788	7117.72	312.938	4.347487e+001	6.014686e+000	104.5	43	7.691638e+000	0	0	0	0	0	0	40.6664	1	1	45.4864	43.8065
DATA	1547	19	17	0	0	A_64_P066782	ENSRNOT00000046676	7143.31	312.986	5.941411e+002	5.955867e+001	621	42	1.070561e+001	0	0	0	0	0	0	557.011	1	1	47.2035	43.9143
DATA	1548	19	18	0	0	A_64_P125013	NM_019167	7168.61	313.069	6.955025e+004	6.955027e+003	65320.5	46.5	1.072287e+001	0	0	0	0	0	0	65336.4	1	1	53.8203	47.5
DATA	1549	19	19	0	0	A_64_P143121	NM_001099510	7194.5	313	2.006099e+001	4.592336e+000	86	46	9.773235e+000	0	0	0	0	0	0	18.8805	1	0	54.1152	46.871
DATA	1550	19	20	0	0	A_64_P065600	NM_022954	7218.78	312.776	4.142393e+000	4.124688e+000	61	48	9.223684e+000	0	0	0	0	0	0	-4.31289	0	0	39.8942	46.1724
DATA	1551	19	21	0	0	A_44_P300818	AF030087	7245	312.951	1.315936e+003	1.316580e+002	1316	44.5	7.629442e+000	0	0	0	0	0	0	1242.24	1	1	50.1463	44.8158
DATA	1552	19	22	0	0	A_64_P103130	A_64_P103130	7270.23	312.661	2.988083e+003	2.988366e+002	2962	43	7.395722e+000	0	0	0	0	0	0	2824.04	1	1	44.7812	44.4324
DATA	1553	19	23	0	0	A_64_P064938	NM_001109332	7295.55	313.661	6.708285e+000	4.163594e+000	71.5	43.5	8.578856e+000	0	0	0	0	0	0	6.34704	1	0	44.0646	42.875
DATA	1554	19	24	0	0	A_64_P087276	NM_138527	7321.17	313.227	4.123784e+000	4.106158e+000	62.5	45.5	9.059508e+000	0	0	0	0	0	0	-3.54111	0	0	48.5334	44.9211
DATA	1555	19	25	0	0	A_64_P032728	NM_001037778	7346.5	313.231	2.019613e+004	2.019617e+003	19009.5	43.5	9.981823e+000	0	0	0	0	0	0	19133.5	1	1	49.8279	42.1333
DATA	1556	19	26	0	0	A_44_P956203	NM_001134992	7372	313.455	5.282579e+001	6.688384e+000	114	43.5	9.918577e+000	0	0	0	0	0	0	50.0652	1	1	55.8519	42.3667
DATA	1557	19	27	0	0	A_64_P106488	A_64_P106488	7397.42	313.427	6.958843e+001	8.077749e+000	130	47	1.154580e+001	0	0	0	0	0	0	65.9602	1	1	57.5363	47.3448
DATA	1558	19	28	0	0	A_43_P10011	NM_001025274	7422.58	313.427	1.206027e+003	1.206725e+002	1236	43	7.481378e+000	0	0	0	0	0	0	1143.05	1	1	57.5363	43.6667
DATA	1559	19	29	0	0	A_44_P321009	NM_012540	7448.42	313.427	4.121008e+000	4.108732e+000	68.5	44	7.482934e+000	0	0	0	0	0	0	1.98372	0	0	57.5363	43.0741
DATA	1560	19	30	0	0	A_44_P133453	XM_236776	7473.37	312.957	6.296061e+003	6.296195e+002	6116	44	5.852350e+000	0	0	0	0	0	0	5962.07	1	1	46.8651	43
DATA	1561	19	31	0	0	A_64_P027323	NM_001000088	7499.06	312.906	8.216165e+001	9.186276e+000	143.5	45	1.020317e+001	0	0	0	0	0	0	77.7446	1	1	45.835	45.2308
DATA	1562	19	32	0	0	A_44_P374568	NM_001107778	7523.94	313.232	6.491990e+002	6.505003e+001	666.5	41	1.228766e+001	0	0	0	0	0	0	613.745	1	1	46.5243	45.6857
DATA	1563	19	33	0	0	A_64_P040176	NM_001108498	7549.38	313.367	3.386616e+003	3.386867e+002	3168	38	6.410367e+000	0	0	0	0	0	0	3197.97	1	1	50.7771	38.9697
DATA	1564	19	34	0	0	A_64_P347204	ENSRNOT00000002350	7575.33	313.5	1.826414e+002	1.872373e+001	240	37	6.773968e+000	0	0	0	0	0	0	172.227	1	1	57.5363	39.5385
DATA	1565	19	35	0	0	A_64_P142544	A_64_P142544	7600.5	313.5	1.876175e+001	4.535759e+000	85	39	6.727203e+000	0	0	0	0	0	0	17.664	1	0	57.5363	40.5405
DATA	1566	19	36	0	0	A_64_P047367	NM_017050	7625.89	313.5	7.174471e+004	7.174473e+003	66020	42	8.958541e+000	0	0	0	0	0	0	67425.3	1	1	56.9804	43.7429
DATA	1567	19	37	0	0	A_64_P130858	NM_001003705	7651.34	313.323	1.978904e+002	2.021857e+001	255	42.5	8.801977e+000	0	0	0	0	0	0	185.599	1	1	45.835	44.4063
DATA	1568	19	38	0	0	A_42_P647009	NM_053814	7676.63	313.37	3.463841e+003	3.464091e+002	3285	42	8.798674e+000	0	0	0	0	0	0	3241.57	1	1	48.2044	42.6667
DATA	1569	19	39	0	0	A_42_P618538	NM_001030031	7702.05	313.466	1.382062e+003	1.382690e+002	1340	38.5	8.539100e+000	0	0	0	0	0	0	1290.28	1	1	48.5334	39.5882
DATA	1570	19	40	0	0	A_64_P048225	NM_001108643	7727.44	313.232	4.639916e+001	6.242048e+000	109	43	1.015123e+001	0	0	0	0	0	0	43.204	1	1	46.8651	44.2813
DATA	1571	19	41	0	0	A_64_P044826	A_64_P044826	7753	313.2	1.925206e+002	1.970214e+001	243.5	43	9.376131e+000	0	0	0	0	0	0	178.759	1	1	46.8651	43.6129
DATA	1572	19	42	0	0	A_64_P046273	NM_001168559	7778.13	313.229	2.845600e+002	2.876421e+001	330	47	8.049427e+000	0	0	0	0	0	0	263.443	1	1	46.5243	46.9714
DATA	1573	19	43	0	0	A_43_P16232	NM_024395	7803.44	313.521	2.349597e+003	2.349975e+002	2171	47	1.149053e+001	0	0	0	0	0	0	2168.48	1	1	48.2044	46.9677
DATA	1574	19	44	0	0	A_44_P147356	XM_225859	7828.74	313.58	1.122576e+004	1.122584e+003	10488	42	1.027300e+001	0	0	0	0	0	0	10326.2	1	1	46.8651	43.6286
DATA	1575	19	45	0	0	A_44_P979417	ENSRNOT00000068382	7854.53	313.532	5.982120e+001	7.333333e+000	125	43	6.827069e+000	0	0	0	0	0	0	54.8317	1	1	43.7019	41.1875
DATA	1576	19	46	0	0	A_44_P283784	NM_001107682	7879.7	313.507	9.553251e+002	9.562732e+001	918	41	1.034948e+001	0	0	0	0	0	0	872.469	1	1	46.8651	43.3871
DATA	1577	19	47	0	0	A_44_P112061	ENSRNOT00000046359	7905.11	313.44	6.518263e+002	6.532257e+001	667	43.5	1.007782e+001	0	0	0	0	0	0	593.018	1	1	48.8603	45.7941
DATA	1578	19	48	0	0	A_42_P541025	NM_212546	7930.58	313.573	2.827143e+002	2.859513e+001	320	46	6.889022e+000	0	0	0	0	0	0	256.19	1	1	57.5363	45.7
DATA	1579	19	49	0	0	A_44_P156521	NM_001025135	7956.18	313.545	1.083521e+003	1.084377e+002	1057	42.5	7.108187e+000	0	0	0	0	0	0	977.802	1	1	52.6241	41.4737
DATA	1580	19	50	0	0	A_42_P562202	NM_001107959	7981.11	313.648	1.248314e+002	1.321153e+001	178	43	8.572185e+000	0	0	0	0	0	0	112.185	1	1	47.8731	42.4
DATA	1581	19	51	0	0	A_42_P522899	NM_021578	8006.61	313.594	1.627544e+002	1.684551e+001	210.5	45	1.028306e+001	0	0	0	0	0	0	145.625	1	1	47.5395	45.2069
DATA	1582	19	52	0	0	A_42_P581060	NM_001108722	8031.99	313.616	1.280107e+004	1.280114e+003	11282	43	7.923402e+000	0	0	0	0	0	0	11402.6	1	1	48.8603	42.9697
DATA	1583	19	53	0	1	ERCC-00043_129	ERCC-00043_129	8057	312.857	4.403817e+000	4.384995e+000	61	46	8.816447e+000	0	0	0	0	0	0	-5.55977	0	0	42.5954	45.7838
DATA	1584	19	54	0	0	A_64_P098577	A_64_P098577	8083	313.545	4.424604e+000	4.405693e+000	67	44	1.011546e+001	0	0	0	0	0	0	-2.06452	0	0	55.8519	44.4516
DATA	1585	19	55	0	0	A_64_P043164	ENSRNOT00000009696	8108.29	313.471	6.449556e+002	6.464730e+001	641	44	7.840623e+000	0	0	0	0	0	0	566.448	1	1	47.2035	43.7586
DATA	1586	19	56	0	0	A_42_P576446	NM_001107673	8133.51	313.63	1.525758e+004	1.525764e+003	13522	45	8.125266e+000	0	0	0	0	0	0	13336.1	1	1	48.5334	46.4074
DATA	1587	19	57	0	0	A_42_P801593	NM_001134744	8158.99	313.616	2.896970e+003	2.897315e+002	2536	43	1.201370e+001	0	0	0	0	0	0	2519.64	1	1	48.8603	42.0645
DATA	1588	19	58	0	0	A_42_P535743	NM_199393	8184.44	313.74	5.640879e+003	5.641057e+002	4749	43	1.014420e+001	0	0	0	0	0	0	4881.77	1	1	49.5074	44.6429
DATA	1589	19	59	0	0	A_64_P051890	ENSRNOT00000056631	8209.91	313.614	3.581134e+001	5.763038e+000	97.5	45	8.927915e+000	0	0	0	0	0	0	30.8354	1	1	57.259	44.6786
DATA	1590	19	60	0	0	A_64_P098379	NM_001013890	8235.5	313.648	2.616860e+001	5.238822e+000	91	41.5	6.177005e+000	0	0	0	0	0	0	22.4178	1	1	57.5363	41.3462
DATA	1591	19	61	0	0	A_64_P144513	XR_086096	8260.5	314	6.240079e+004	6.240081e+003	53146.5	40	1.029594e+001	0	0	0	0	0	0	53192.2	1	1	54.1152	42.1613
DATA	1592	19	62	0	0	A_44_P325337	NM_001030041	8285.92	313.901	1.446635e+002	1.517538e+001	189	44	8.666896e+000	0	0	0	0	0	0	122.685	1	1	46.8651	43.1786
DATA	1593	19	63	0	0	A_44_P142029	NM_001002851	8311.22	313.851	5.597549e+003	5.597738e+002	4836	39.5	7.190671e+000	0	0	0	0	0	0	4722.98	1	1	46.1809	39.1333
DATA	1594	19	64	0	0	A_44_P292568	NM_001000207	8336.94	313.687	1.494787e+002	1.564904e+001	192.5	42.5	8.676734e+000	0	0	0	0	0	0	125.472	1	1	45.835	42.8333
DATA	1595	19	65	0	0	A_42_P624092	XR_007263	8362	313.797	9.269300e+003	9.269417e+002	7636	41	8.235977e+000	0	0	0	1	0	0	7741.99	1	1	46.8651	41.4359
DATA	1596	19	66	0	0	A_42_P597322	NM_001103357	8387.5	314	7.228205e+002	7.243328e+001	674	40	8.650678e+000	0	0	0	1	0	0	600.704	1	1	54.1152	40.8824
DATA	1597	19	67	0	0	A_64_P034409	NM_001108146	8413	314	2.299803e+003	2.300283e+002	2014	41.5	9.207413e+000	0	0	0	0	0	0	1901.76	1	1	46.8651	39.5357
DATA	1598	19	68	0	0	A_64_P112797	NM_001001121	8438.63	314	6.418864e+002	6.436231e+001	599	41.5	9.076687e+000	0	0	0	0	0	0	528.173	1	1	46.5243	41.6429
DATA	1599	19	69	0	0	A_42_P761023	NM_001144870	8464	314	3.483752e+002	3.515955e+001	358	43.5	1.079767e+001	0	0	0	1	0	0	285.284	1	1	54.9904	45.7105
DATA	1600	19	70	0	0	A_42_P465408	NM_031647	8489.35	313.914	1.106568e+003	1.107595e+002	974.5	42	8.766821e+000	0	0	0	1	0	0	901.903	1	1	49.5074	41.7143
DATA	1601	19	71	0	0	A_64_P115761	NM_001109379	8515	314	2.471269e+001	5.391969e+000	86	42	6.579749e+000	0	0	0	0	0	0	20.049	1	1	46.8651	41.6897
DATA	1602	19	72	0	0	A_64_P086487	A_64_P086487	8540	313.467	1.857446e+001	5.159827e+000	84	46.5	1.209469e+001	0	0	0	0	0	0	15.0015	1	0	43.7019	47.8333
DATA	1603	19	73	0	0	A_42_P774028	NM_001017447	8565.43	314	3.572677e+003	3.573004e+002	3012	48	1.354873e+001	0	0	0	0	0	0	2873.29	1	1	49.8279	48.4545
DATA	1604	19	74	0	0	A_44_P233080	ENSRNOT00000026303	8590.76	314	1.517938e+004	1.517946e+003	11953	48	9.366667e+000	0	0	0	0	0	0	12157.4	1	1	46.8651	48.0286
DATA	1605	19	75	0	0	A_64_P078002	ENSRNOT00000056206	8616.42	314.427	1.201873e+001	5.019435e+000	76.5	50.5	1.349245e+001	0	0	0	0	0	0	9.5883	1	0	57.5363	50.75
DATA	1606	19	76	0	0	A_64_P047888	A_64_P047888	8641.13	314.566	4.912196e+000	4.891827e+000	68.5	55	1.368949e+001	0	0	0	0	0	0	0.621904	0	0	41.0736	55.0714
DATA	1607	19	77	0	0	A_44_P236001	NM_001000623	8667.09	314.386	1.188814e+002	1.286188e+001	160.5	50	1.588409e+001	0	0	0	0	0	0	94.1501	1	1	57.259	54.5789
DATA	1608	19	78	0	0	A_42_P819040	TC636720	8692.5	314.352	2.273858e+001	5.425080e+000	86	45	1.125795e+001	0	0	0	0	0	0	17.9484	1	0	57.5363	47.5
DATA	1609	19	79	0	0	A_44_P168184	NM_001166675	8717.97	314.092	5.915868e+003	5.916074e+002	4738.5	44.5	8.508548e+000	0	0	0	0	0	0	4655.02	1	1	46.5243	45.3462
DATA	1610	19	80	0	0	A_64_P094925	NM_001024748	8743.24	313.925	3.773387e+002	3.805780e+001	376	46	1.380656e+001	0	0	0	0	0	0	296.082	1	1	45.835	47.3939
DATA	1611	19	81	0	0	A_44_P332483	NM_173338	8768.58	314.427	4.988059e+000	4.975698e+000	69	42	9.334770e+000	0	0	0	0	0	0	2.33623	0	0	65	43.931
DATA	1612	19	82	0	0	A_42_P530071	NM_001107153	8793.73	314.284	1.052651e+004	1.052663e+003	7912	43	9.243440e+000	0	0	0	1	0	0	8221.93	1	1	48.8603	45.2059
DATA	1613	19	83	66	1	DarkCorner	DarkCorner	8819.42	314.427	5.008287e+000	4.986881e+000	65	42	8.524222e+000	0	0	0	0	0	0	-4.3549	0	0	65	43.9355
DATA	1614	19	84	66	1	DarkCorner	DarkCorner	8844.58	314.427	5.015760e+000	4.994322e+000	60.5	44	1.008156e+001	0	0	0	0	0	0	-7.83838	0	0	57.5363	45.5
DATA	1615	19	85	66	1	DarkCorner	DarkCorner	8870.04	314.303	5.021607e+000	5.000144e+000	63	42	1.019515e+001	0	0	0	0	0	0	-5.62092	0	0	49.1849	42.5
DATA	1616	20	1	66	1	DarkCorner	DarkCorner	6749.97	320.125	4.386452e+000	4.367704e+000	59	44	7.444980e+000	0	0	0	0	0	0	-3.4435	0	0	46.8651	44.2245
DATA	1617	20	2	66	1	DarkCorner	DarkCorner	6774.89	320.52	4.367359e+000	4.348693e+000	62	43	9.926229e+000	0	0	0	0	0	0	-1.69325	0	0	48.8603	44.4324
DATA	1618	20	3	66	1	DarkCorner	DarkCorner	6800.58	320.427	4.348584e+000	4.329998e+000	58	41	1.057045e+001	0	0	0	0	0	0	-3.73887	0	0	57.5363	42.3556
DATA	1619	20	4	0	0	A_42_P787775	NM_001127566	6826.09	320.386	9.027457e+002	9.037749e+001	880	43	8.510283e+000	0	0	0	0	0	0	813.972	1	1	57.259	41.7297
DATA	1620	20	5	0	0	A_42_P607770	NM_001134616	6851.14	319.844	8.749772e+003	8.749878e+002	7869	44	1.042640e+001	0	0	0	0	0	0	7920.25	1	1	45.4864	42.641
DATA	1621	20	6	0	0	A_42_P484738	NM_022266	6876.63	319.735	3.847615e+003	3.847852e+002	3556	43	9.007285e+000	0	0	0	0	0	0	3496.56	1	1	46.5243	43.7419
DATA	1622	20	7	0	0	A_64_P075273	NM_031743	6902.42	320.427	3.579691e+002	3.604966e+001	389	44	9.859356e+000	0	0	0	0	0	0	326.6	1	1	65	44.2759
DATA	1623	20	8	0	0	A_42_P674050	NM_001107225	6927.26	319.812	5.086459e+003	5.086636e+002	4671	45	7.627575e+000	0	0	0	0	0	0	4656.93	1	1	46.5243	44.4286
DATA	1624	20	9	1028	1	(+)E1A_r60_a107	E1A_r60_a107	6953	320.455	1.135116e+001	4.380640e+000	74	45	8.887022e+000	0	0	0	0	0	0	10.4307	1	0	55.8519	45.6667
DATA	1625	20	10	0	0	A_64_P144253	NM_201350	6978.42	320.427	3.865422e+001	5.720430e+000	98	42	9.548296e+000	0	0	0	0	0	0	35.639	1	1	57.5363	43.2069
DATA	1626	20	11	0	0	A_44_P791729	NM_181377	7003.25	320.308	9.423536e+003	9.423630e+002	9042	45	1.047640e+001	0	0	0	0	0	0	8715.49	1	1	45.1352	45.7037
DATA	1627	20	12	0	0	A_42_P550624	NM_001109319	7028.8	320.386	2.171778e+003	2.172182e+002	2012	43.5	9.335967e+000	0	0	0	0	0	0	2014.76	1	1	47.2035	45.5313
DATA	1628	20	13	0	0	A_43_P11580	NM_012833	7054.23	320	1.778052e+002	1.826506e+001	230	42.5	1.058737e+001	0	0	0	0	0	0	165.414	1	1	46.8651	44.4
DATA	1629	20	14	0	0	A_44_P417055	XM_223442	7079.97	320.147	1.301825e+003	1.302492e+002	1276.5	42	8.961991e+000	0	0	0	0	0	0	1214.41	1	1	46.8651	42.5294
DATA	1630	20	15	0	0	A_64_P142867	A_64_P142867	7105.1	320.333	1.267814e+004	1.267821e+003	12050	43.5	8.565573e+000	0	0	0	0	0	0	11856.4	1	1	45.1352	43.9643
DATA	1631	20	16	0	0	A_64_P013002	XM_001072551	7130.67	320.5	1.665712e+001	4.469652e+000	79	42	7.871019e+000	0	0	0	0	0	0	15.6139	1	0	57.5363	43.4
DATA	1632	20	17	0	0	A_42_P457692	NM_001008363	7156.09	320.324	5.271304e+003	5.271467e+002	5014.5	45	1.170996e+001	0	0	0	0	0	0	4951.52	1	1	48.8603	45.1379
DATA	1633	20	18	0	0	A_42_P788480	NM_019194	7181.19	320.392	1.426215e+004	1.426221e+003	13205.5	48	1.012005e+001	0	0	0	0	0	0	13422.4	1	1	49.1849	49.6875
DATA	1634	20	19	0	0	A_42_P518462	NM_001007020	7206.69	320.662	1.179287e+004	1.179295e+003	11177.5	45	1.083114e+001	0	0	0	0	0	0	11118	1	1	48.5334	45.9063
DATA	1635	20	20	0	0	A_64_P007578	NM_001000851	7231.82	320.318	1.626933e+001	4.427664e+000	81	47	7.258525e+000	0	0	0	0	0	0	15.3606	1	0	45.4864	46.3784
DATA	1636	20	21	0	0	A_64_P139350	NM_001191727	7257.2	320.494	1.325274e+002	1.387615e+001	191	45	7.845775e+000	0	0	0	0	0	0	125.291	1	1	50.1463	46.1053
DATA	1637	20	22	0	0	A_64_P100442	ENSRNOT00000067861	7283	320.145	2.895213e+002	2.924213e+001	341	43.5	8.121498e+000	0	0	0	0	0	0	274.006	1	1	42.5954	44.6111
DATA	1638	20	23	1028	1	(+)E1A_r60_a135	E1A_r60_a135	7308.5	320.5	4.121894e+000	4.104277e+000	63.5	43	1.049395e+001	0	0	0	0	0	0	-1.88362	0	0	57.5363	42.6389
DATA	1639	20	24	0	0	A_44_P459760	NM_001108187	7333.89	320.5	5.752583e+001	7.065047e+000	127	44	8.875720e+000	0	0	0	0	0	0	54.5296	1	1	65	42.8182
DATA	1640	20	25	0	0	A_64_P115536	NM_212545	7359.42	320.573	7.885566e+000	4.174806e+000	73	43	9.708180e+000	0	0	0	0	0	0	7.47829	1	0	65	41.0345
DATA	1641	20	26	0	0	A_44_P538406	NM_013102	7384.51	320.573	3.303232e+004	3.303235e+003	30297	45.5	1.299099e+001	0	0	0	0	0	0	31333.5	1	1	49.1849	49.6071
DATA	1642	20	27	0	0	A_64_P120871	NM_198743	7409.75	320.553	1.585132e+003	1.585662e+002	1509	43	6.355313e+000	0	0	0	0	0	0	1503.64	1	1	49.5074	44.16
DATA	1643	20	28	0	0	A_44_P173048	NM_001009255	7435.46	320.316	1.957158e+003	1.957587e+002	1943	43	6.793913e+000	0	0	0	0	0	0	1856.12	1	1	49.5074	42.1875
DATA	1644	20	29	0	0	A_64_P058060	NM_001037541	7460.9	320.23	2.871836e+001	5.006807e+000	92.5	42	7.635642e+000	0	0	0	0	0	0	27.2242	1	1	44.7812	41.2727
DATA	1645	20	30	0	0	A_64_P145982	NM_001109366	7486.42	320.573	4.486451e+001	6.080219e+000	110	42	8.953630e+000	0	0	0	0	0	0	42.5048	1	1	57.5363	42.8966
DATA	1646	20	31	0	0	A_42_P514244	NM_012791	7511.44	320.587	3.955382e+002	3.976649e+001	423.5	43.5	1.048816e+001	0	0	0	0	0	0	374.422	1	1	49.5074	45.1923
DATA	1648	20	33	0	0	A_64_P159155	XM_001071429	7562.14	320.662	2.200221e+001	4.667801e+000	86	38	7.044285e+000	0	0	0	0	0	0	20.7793	1	1	47.5395	39.5
DATA	1649	20	34	0	0	A_64_P030272	ENSRNOT00000041731	7587.92	321.077	2.175626e+002	2.214344e+001	275	38	6.721094e+000	0	0	0	0	0	0	205.17	1	1	46.1809	39.6571
DATA	1650	20	35	0	0	A_42_P733076	NM_001033867	7613.42	320.573	4.217785e+002	4.237957e+001	472	43	7.890530e+000	0	0	0	0	0	0	397.055	1	1	65	42.7179
DATA	1651	20	36	0	0	A_44_P349475	NM_031333	7637.99	321.104	2.628850e+003	2.629176e+002	2579	42.5	1.004930e+001	0	0	0	0	0	0	2470.36	1	1	46.8651	42.6667
DATA	1652	20	37	0	0	A_64_P009848	NM_001034135	7664.07	320.595	5.952339e+003	5.952483e+002	5640	40	7.712752e+000	0	0	0	0	0	0	5581.11	1	1	51.4001	40.475
DATA	1653	20	38	0	0	A_64_P116685	NM_001166763	7689.5	320.5	5.200581e+003	5.200747e+002	5025	39	8.511134e+000	0	0	0	0	0	0	4864.95	1	1	52.9257	40.4242
DATA	1654	20	39	0	0	A_64_P072659	NM_001109296	7714.84	320.629	1.587275e+003	1.587822e+002	1601	40	7.398431e+000	0	0	0	0	0	0	1481.16	1	1	44.0646	40.7667
DATA	1655	20	40	0	0	A_42_P808442	NM_001108759	7740.15	320.864	8.639780e+002	8.649874e+001	862.5	40	9.227289e+000	0	0	0	0	0	0	804.081	1	1	46.1809	41.3333
DATA	1656	20	41	0	0	A_64_P140836	NM_001017486	7765.5	321	2.683193e+002	2.715703e+001	323	44	8.760798e+000	0	0	0	0	0	0	249.006	1	1	48.5334	44.8611
DATA	1657	20	42	0	0	A_64_P034384	NM_019227	7790.88	321	4.662362e+002	4.681262e+001	500	46	9.093538e+000	0	0	0	0	0	0	431.356	1	1	49.8279	45.6857
DATA	1658	20	43	0	0	A_42_P730411	NM_001012181	7816.17	321	1.410827e+003	1.411456e+002	1355	45	1.156978e+001	0	0	0	0	0	0	1301.08	1	1	46.8651	47.7879
DATA	1659	20	44	0	0	A_44_P396450	ENSRNOT00000018433	7841.43	320.941	2.687659e+002	2.720746e+001	320	44	9.224576e+000	0	0	0	0	0	0	247.02	1	1	46.5243	44.9697
DATA	1660	20	45	0	0	A_44_P268610	NM_001109134	7867.07	320.789	5.453813e+003	5.453978e+002	5056.5	44	8.778316e+000	0	0	0	0	0	0	4994.42	1	1	47.8731	42.8235
DATA	1661	20	46	0	0	A_64_P059105	NM_001134544	7892.57	320.853	1.205408e+002	1.278517e+001	180	42.5	9.546957e+000	0	0	0	0	0	0	109.975	1	1	47.2035	44.6471
DATA	1662	20	47	0	0	A_42_P524851	NM_001130061	7918	320.797	1.379388e+003	1.380051e+002	1291	46	8.116093e+000	0	0	0	0	0	0	1253.6	1	1	46.8651	45.75
DATA	1663	20	48	0	0	A_64_P141675	FM127585	7943.09	320.896	3.757924e+003	3.758170e+002	3458	44	7.114360e+000	0	0	0	0	0	0	3401.71	1	1	46.8651	44.6757
DATA	1664	20	49	0	0	A_64_P002979	ENSRNOT00000034762	7968.43	320.483	4.331658e+000	4.313145e+000	65.5	42.5	7.102646e+000	0	0	0	0	0	0	-3.29166	0	0	43.7019	41.5625
DATA	1665	20	50	0	0	A_44_P175822	NM_001109511	7994.07	321	2.327411e+002	2.367376e+001	281	42	7.953764e+000	0	0	0	0	0	0	208.903	1	1	46.8651	42.0645
DATA	1666	20	51	0	0	A_44_P1008751	NM_001137645	8019.5	321	2.009213e+002	2.055779e+001	244.5	42	7.332531e+000	0	0	0	0	0	0	179.547	1	1	54.1152	43.1379
DATA	1667	20	52	0	0	A_44_P255350	NM_001007674	8044.91	321.065	4.048914e+002	4.072434e+001	438	42	8.775635e+000	0	0	0	0	0	0	360.188	1	1	54.4085	43.6
DATA	1668	20	53	0	0	A_64_P017328	NM_012758	8070.29	320.754	1.403216e+003	1.403902e+002	1321	45	9.199102e+000	0	0	0	0	0	0	1242.47	1	1	45.1352	44.5385
DATA	1669	20	54	0	0	A_64_P132571	NM_001107703	8095.45	320.677	8.960906e+003	8.961015e+002	7947.5	44	8.668116e+000	0	0	0	0	0	0	7897.31	1	1	45.1352	44.6071
DATA	1670	20	55	0	0	A_44_P107535	NM_001170336	8121.09	321.386	8.260189e+002	8.272074e+001	799	44	7.265039e+000	0	0	0	0	0	0	724.527	1	1	57.259	44.931
DATA	1671	20	56	0	0	A_44_P353618	NM_053587	8146.5	321.352	1.767519e+002	1.822780e+001	223	44	8.410643e+000	0	0	0	0	0	0	154.279	1	1	57.5363	43.1034
DATA	1672	20	57	0	0	A_44_P213336	A_44_P213336	8171.83	321.271	7.603718e+002	7.616883e+001	738	44.5	1.204378e+001	0	0	0	0	0	0	660.425	1	1	46.8651	43.0882
DATA	1673	20	58	0	0	A_42_P507072	FQ213070	8197.24	321	5.280238e+003	5.280429e+002	4657	44	7.774804e+000	0	0	0	0	0	0	4563.13	1	1	46.8651	43.9375
DATA	1674	20	59	0	0	A_44_P428886	NM_001099516	8222.71	320.833	2.431882e+002	2.473564e+001	282	42	7.068355e+000	0	0	0	0	0	0	209.097	1	1	45.835	41.9643
DATA	1675	20	60	0	0	A_64_P086784	NM_001108657	8247.74	321.222	6.728244e+003	6.728397e+002	5661.5	40	8.576952e+000	0	0	0	0	0	0	5756.61	1	1	47.5395	42.1111
DATA	1676	20	61	0	0	A_42_P654682	NM_012724	8273.42	321.427	1.161941e+001	4.712877e+000	77.5	42	8.837658e+000	0	0	0	0	0	0	9.89082	1	0	57.5363	42.3143
DATA	1677	20	62	0	0	A_44_P443008	NM_001013068	8298.65	320.841	7.454851e+002	7.468974e+001	700	42.5	4.738166e+000	0	0	0	0	0	0	631.323	1	1	44.7812	41.4545
DATA	1678	20	63	0	0	A_64_P027229	A_64_P027229	8324.13	320.767	1.604728e+003	1.605392e+002	1461	42	1.008714e+001	0	0	0	0	0	0	1352.06	1	1	44.4243	41.6471
DATA	1679	20	64	0	0	A_64_P134277	ENSRNOT00000029167	8349.85	320.847	1.056564e+002	1.153884e+001	157	41	8.276172e+000	0	0	0	0	0	0	88.5669	1	1	44.4243	42.7895
DATA	1680	20	65	0	0	A_64_P165548	XM_001055860	8375	321.455	1.031664e+002	1.132058e+001	155	39	7.542860e+000	0	0	0	0	0	0	86.0595	1	1	55.8519	40
DATA	1681	20	66	0	0	A_64_P014737	NM_001000069	8400.42	321.427	5.027185e+000	4.710929e+000	72	42	9.934463e+000	0	0	0	0	0	0	4.17275	1	0	57.5363	41.375
DATA	1682	20	67	0	0	A_42_P627330	NM_001106628	8425.7	321.1	1.261897e+003	1.262774e+002	1122.5	38	7.999583e+000	0	0	0	0	0	0	1042.25	1	1	47.2035	39.08
DATA	1683	20	68	0	0	A_64_P039452	NM_001109063	8451.29	321.711	3.422960e+002	3.455482e+001	354.5	41	8.869423e+000	0	0	0	0	0	0	281.374	1	1	49.5074	41
DATA	1684	20	69	0	0	A_44_P516885	ENSRNOT00000005601	8476.5	321.5	4.773980e+004	4.773983e+003	37726.5	41	1.064315e+001	0	0	0	0	0	0	39057.3	1	1	57.5363	41.88
DATA	1685	20	70	0	0	A_44_P839176	NM_001107114	8502.13	320.857	5.363010e+003	5.363222e+002	4460	40	7.241722e+000	0	0	0	0	0	0	4366.65	1	1	45.4864	40.5938
DATA	1686	20	71	0	0	A_64_P083342	AABR03026150	8527.5	321.5	2.598957e+001	5.454935e+000	90	43.5	1.008817e+001	0	0	0	0	0	0	21.0686	1	1	57.5363	43.2333
DATA	1687	20	72	0	0	A_42_P618185	NM_001108486	8552.7	321.1	3.400108e+003	3.400450e+002	2747.5	51	1.426032e+001	0	0	0	1	0	0	2744.18	1	1	47.2035	48.76
DATA	1688	20	73	0	0	A_42_P619957	NM_053830	8578.33	321.5	5.458590e+002	5.479982e+001	517	47	1.081096e+001	0	0	0	1	0	0	438.721	1	1	57.5363	46.7576
DATA	1689	20	74	0	0	A_44_P375042	NM_001014243	8603.5	321.5	3.127422e+002	3.164909e+001	316	49	9.822073e+000	0	0	0	0	0	0	250.355	1	1	57.5363	49.1613
DATA	1690	20	75	0	0	A_44_P438053	NM_001004201	8629.11	321.392	1.433927e+002	1.514555e+001	183	51	9.952468e+000	0	0	0	0	0	0	114.341	1	1	48.5334	50.5806
DATA	1691	20	76	0	0	A_43_P19181	ENSRNOT00000018440	8654.78	321.286	2.667458e+002	2.711978e+001	279.5	53	1.573750e+001	0	0	0	0	0	0	211.917	1	1	49.8279	56.0857
DATA	1692	20	77	0	0	A_42_P664259	NM_024396	8679.69	321.338	4.574947e+004	4.574949e+003	36357.5	51.5	1.307493e+001	0	0	0	0	0	0	36224.7	1	1	48.5334	51.0769
DATA	1693	20	78	0	0	A_44_P588645	FQ230244	8705.25	321.373	1.808320e+002	1.874210e+001	216	46	9.774264e+000	0	0	0	0	0	0	142.729	1	1	46.1809	47.8333
DATA	1694	20	79	0	0	A_64_P030844	XM_001065657	8730.5	321.5	2.371819e+001	5.479848e+000	87.5	46	1.049922e+001	0	0	0	0	0	0	18.667	1	0	57.5363	47.1852
DATA	1695	20	80	0	0	A_64_P054823	A_64_P054823	8756.07	321.589	1.991667e+004	1.991674e+003	15780.5	45	9.559253e+000	0	0	0	0	0	0	15634.1	1	1	53.5237	46
DATA	1696	20	81	0	0	A_42_P516860	XM_001059330	8781.42	321.573	1.139239e+002	1.242707e+001	160	46	8.841516e+000	0	0	0	0	0	0	89.2199	1	1	57.5363	46.3793
DATA	1697	20	82	0	0	A_64_P085772	NM_001191606	8806.58	321.573	1.320488e+002	1.411071e+001	171.5	41	9.068133e+000	0	0	0	0	0	0	103.21	1	1	57.5363	42.9
DATA	1698	20	83	66	1	DarkCorner	DarkCorner	8832.68	321.436	5.004297e+000	4.982908e+000	57	41	6.138990e+000	0	0	0	0	0	0	-10.1989	0	0	55.2791	41.5172
DATA	1699	20	84	66	1	DarkCorner	DarkCorner	8857.81	321.373	5.010760e+000	4.989344e+000	61	42.5	9.878622e+000	0	0	0	0	0	0	-8.7263	0	0	42.9674	44.55
DATA	1700	20	85	66	1	DarkCorner	DarkCorner	8882.72	321.987	5.014507e+000	4.993074e+000	61	39	9.312648e+000	0	0	0	0	0	0	-8.89214	0	0	49.1849	39.2161
DATA	1701	21	1	66	1	DarkCorner	DarkCorner	6737.24	327.557	4.390181e+000	4.371958e+000	64	39.5	9.043774e+000	0	0	0	0	0	0	0.611334	0	0	46.8651	40.0321
DATA	1702	21	2	66	1	DarkCorner	DarkCorner	6761.72	327.672	4.371604e+000	4.352919e+000	59	43.5	8.828985e+000	0	0	0	0	0	0	-4.07532	0	0	46.1809	45.4412
DATA	1703	21	3	66	1	DarkCorner	DarkCorner	6787.58	328.072	4.352249e+000	4.333647e+000	60	42	8.054855e+000	0	0	0	0	0	0	-3.18109	0	0	50.4627	43.4545
DATA	1704	21	4	0	0	A_44_P277669	NM_001163736	6813.25	327.671	7.767145e+002	7.779126e+001	762	41	8.222399e+000	0	0	0	0	0	0	699.733	1	1	48.2044	40.7059
DATA	1705	21	5	0	0	A_42_P788480	NM_019194	6838.44	327.027	1.446499e+004	1.446505e+003	12809	45	8.171047e+000	0	0	0	0	0	0	13082.8	1	1	48.5334	46.8621
DATA	1706	21	6	0	0	A_42_P558354	NM_001007686	6863.95	327.534	3.463900e+003	3.464165e+002	3133	41	9.876413e+000	0	0	0	1	0	0	3145.65	1	1	48.5334	40.8919
DATA	1707	21	7	0	0	A_44_P714409	NM_001047907	6889.2	327.239	6.723675e+003	6.723811e+002	6037.5	42	1.087045e+001	0	0	0	0	0	0	6128.97	1	1	46.8651	42.3333
DATA	1708	21	8	0	0	A_42_P604331	NM_001108533	6914.89	327.5	8.972325e+004	8.972326e+003	81393	44.5	8.404065e+000	0	0	0	0	0	0	82097.4	1	1	56.9804	44.9643
DATA	1709	21	9	0	0	A_64_P139472	NM_173119	6940.06	327.389	4.824443e+003	4.824629e+002	4521	47	1.155337e+001	0	0	0	0	0	0	4429.91	1	1	48.2044	48.1379
DATA	1710	21	10	0	0	A_42_P711589	NM_022948	6965.58	327.409	6.072952e+003	6.073098e+002	5619.5	43	8.389574e+000	0	0	0	1	0	0	5595.47	1	1	52.9257	45.4194
DATA	1711	21	11	0	0	A_42_P813567	NM_031841	6991.11	327.5	1.364006e+005	1.364006e+004	126215	38.5	9.814415e+000	0	0	0	0	0	0	126089	1	1	56.9804	42.7857
DATA	1712	21	12	0	0	A_42_P647505	TC640289	7016.13	327.526	3.774536e+003	3.774769e+002	3442.5	43.5	1.129440e+001	0	0	0	0	0	0	3499.84	1	1	50.1463	45.775
DATA	1713	21	13	0	0	A_64_P094313	NM_032073	7041.91	327.104	8.667198e+002	8.677276e+001	879	44	1.176924e+001	0	0	0	0	0	0	805.984	1	1	46.8651	46.4688
DATA	1714	21	14	0	0	A_42_P577421	NM_001106819	7066.94	327.389	2.649472e+002	2.682078e+001	314	42	7.869722e+000	0	0	0	0	0	0	247.058	1	1	48.2044	42.2564
DATA	1715	21	15	0	0	A_42_P477311	NM_001013170	7092.5	327.5	9.979742e+003	9.979828e+002	9558.5	43	9.817650e+000	0	0	0	0	0	0	9330.12	1	1	49.1849	43.3571
DATA	1716	21	16	0	0	A_42_P630249	NM_031824	7117.69	327.389	4.571059e+003	4.571247e+002	4149	41	8.027061e+000	0	0	0	1	0	0	4283.56	1	1	48.2044	41.3939
DATA	1717	21	17	0	0	A_42_P618256	NM_001024759	7143.24	327.529	9.264084e+002	9.273328e+001	935	46	8.493982e+000	0	0	0	0	0	0	870.073	1	1	47.2035	44.0909
DATA	1718	21	18	0	0	A_64_P101584	A_64_P101584	7168.63	327.559	5.497911e+002	5.513411e+001	585	49	1.158318e+001	0	0	0	0	0	0	517.392	1	1	46.8651	48.2069
DATA	1719	21	19	0	0	A_64_P045461	NM_001106750	7194.42	327.573	2.851526e+002	2.881190e+001	323	46.5	9.479126e+000	0	0	0	0	0	0	268.84	1	1	57.5363	47.7813
DATA	1720	21	20	0	0	A_64_P056485	ENSRNOT00000033663	7219.42	327.878	2.239734e+003	2.240112e+002	2146.5	46	8.469934e+000	0	0	0	0	0	0	2115	1	1	48.5334	46.1613
DATA	1721	21	21	0	0	A_64_P013077	A_64_P013077	7245	327.545	2.625649e+002	2.657647e+001	314	47	8.823112e+000	0	0	0	0	0	0	248.281	1	1	55.8519	47.7742
DATA	1722	21	22	0	0	A_44_P348952	NM_001000368	7269.83	327.804	4.124319e+000	4.119148e+000	68	44.5	7.388977e+000	0	0	0	0	0	0	3.03043	0	0	37.4241	45.5238
DATA	1723	21	23	0	0	A_64_P147609	NM_001106295	7295.44	327.521	4.822100e+003	4.822275e+002	4670	40.5	8.920325e+000	0	0	0	0	0	0	4569.58	1	1	48.2044	41.9412
DATA	1724	21	24	0	0	A_44_P193928	NM_183328	7320.93	327.653	1.196300e+003	1.197002e+002	1168	46.5	8.897788e+000	0	0	0	0	0	0	1134.54	1	1	48.5334	45.4722
DATA	1725	21	25	0	0	A_44_P441947	XM_001079870	7346.48	327.701	1.910120e+003	1.910559e+002	1900	45	8.306624e+000	0	0	0	0	0	0	1812.53	1	1	49.8279	44
DATA	1726	21	26	0	0	A_42_P666259	NM_001009661	7371.65	327.933	1.488558e+004	1.488564e+003	13852	45	6.717600e+000	0	0	0	0	0	0	14130.2	1	1	49.1849	46.6154
DATA	1727	21	27	0	0	A_64_P082486	A_64_P082486	7397.41	327.908	1.403286e+003	1.403883e+002	1406	51.5	1.463825e+001	0	0	0	0	0	0	1332.24	1	1	49.1849	52.0385
DATA	1728	21	28	0	0	A_64_P091940	NM_033237	7422.5	327.957	2.770727e+002	2.800833e+001	335	44.5	6.173537e+000	0	0	0	0	0	0	263.021	1	1	47.8731	45.7273
DATA	1729	21	29	0	0	A_64_P144899	NM_001107736	7447.94	327.531	8.129574e+002	8.139892e+001	842	41	7.086204e+000	0	0	0	0	0	0	771.456	1	1	44.0646	41
DATA	1730	21	30	0	0	A_44_P410062	XM_224553	7473.43	327.761	6.507781e+002	6.520678e+001	683	43	6.608946e+000	0	0	0	0	0	0	617.247	1	1	46.5243	43.3333
DATA	1731	21	31	0	0	A_42_P489764	NM_001004099	7498.8	327.757	9.009596e+003	9.009689e+002	8614.5	41	8.593696e+000	0	0	0	0	0	0	8539.06	1	1	46.8651	40.4194
DATA	1732	21	32	0	0	A_42_P640277	NM_001003401	7524.5	328	4.337199e+004	4.337201e+003	40748.5	42.5	9.277088e+000	0	0	0	0	0	0	41068.2	1	1	54.1152	43.7333
DATA	1733	21	33	0	0	A_44_P212850	NM_019305	7549.44	327.944	6.789300e+001	7.936799e+000	134	38.5	7.214369e+000	0	0	0	0	0	0	64.2128	1	1	48.2044	39.5667
DATA	1734	21	34	0	0	A_64_P125506	NM_021677	7574.85	328.215	3.177026e+002	3.203581e+001	378	41.5	7.599290e+000	0	0	0	0	0	0	300.077	1	1	45.835	41.7222
DATA	1735	21	35	0	0	A_42_P802358	NM_001024341	7600.09	328.104	1.497381e+004	1.497387e+003	14542	40	6.288178e+000	0	0	0	0	0	0	14120.7	1	1	46.8651	40.4
DATA	1736	21	36	0	0	A_44_P552852	XM_346367	7625.91	328.065	1.375668e+001	4.353418e+000	81.5	41.5	8.213814e+000	0	0	0	0	0	0	12.9492	1	0	54.4085	42.7813
DATA	1738	21	38	0	0	A_64_P141187	NM_001108899	7676.92	327.81	1.563237e+001	4.432704e+000	82	39	8.303887e+000	0	0	0	0	0	0	14.6525	1	0	45.4864	39.7273
DATA	1739	21	39	0	0	A_44_P274823	NM_001105831	7701.85	327.924	3.571208e+003	3.571450e+002	3402	40	7.246396e+000	0	0	0	0	0	0	3339.55	1	1	46.1809	40.05
DATA	1740	21	40	0	0	A_42_P804913	ENSRNOT00000022886	7727.06	327.846	9.915368e+001	1.075591e+001	159	40	8.223799e+000	0	0	0	0	0	0	92.4833	1	1	45.835	40.1316
DATA	1741	21	41	0	0	A_64_P113970	NM_212501	7752.78	327.694	2.663653e+003	2.663981e+002	2512	43	8.554112e+000	0	0	0	0	0	0	2477.45	1	1	46.8651	43.4474
DATA	1742	21	42	1028	1	(+)E1A_r60_3	E1A_r60_3	7778.42	328.427	3.842925e+001	5.687113e+000	100.5	43	8.737049e+000	0	0	0	0	0	0	35.6393	1	1	57.5363	44.0769
DATA	1743	21	43	0	0	A_42_P661992	TC596141	7803.58	328.427	3.483295e+002	3.508588e+001	383	44	1.263245e+001	0	0	0	0	0	0	322.038	1	1	57.5363	49.3103
DATA	1744	21	44	0	0	A_42_P577431	NM_001109422	7829.09	328.386	1.728288e+002	1.779047e+001	222	46.5	1.110640e+001	0	0	0	0	0	0	159.253	1	1	57.259	47.2647
DATA	1745	21	45	0	0	A_44_P524785	NM_001000184	7854.5	328.352	1.408057e+001	4.462060e+000	81.5	44	9.769600e+000	0	0	0	0	0	0	12.9294	1	0	65	45.5152
DATA	1746	21	46	0	0	A_64_P027634	NM_001000223	7879.58	328.427	6.317989e+001	7.614018e+000	127	45	8.955351e+000	0	0	0	0	0	0	57.8071	1	1	57.5363	45.0857
DATA	1747	21	47	0	0	A_42_P492976	NM_001126099	7905	327.986	7.703729e+002	7.715530e+001	761	44	7.970649e+000	0	0	0	0	0	0	702.153	1	1	46.8651	43.7813
DATA	1748	21	48	0	0	A_64_P157479	AABR03127998	7930.61	328.141	7.085808e+003	7.085937e+002	6526	44	6.830964e+000	0	0	0	0	0	0	6432.85	1	1	47.5395	43.4
DATA	1749	21	49	0	0	A_44_P391706	NM_001007796	7956	328.455	2.390530e+002	2.428894e+001	285	42.5	6.882317e+000	0	0	0	0	0	0	216.149	1	1	55.8519	41.6579
DATA	1750	21	50	0	0	A_44_P184685	NM_001007735	7981.31	328.375	1.652051e+002	1.707549e+001	209.5	42	7.667197e+000	0	0	0	0	0	0	148.75	1	1	48.2044	41.3947
DATA	1751	21	51	0	0	A_44_P475275	NM_001000893	8006.69	328.459	7.910574e+001	9.021325e+000	137	39	6.065793e+000	0	0	0	0	0	0	70.9191	1	1	49.1849	39.9231
DATA	1752	21	52	0	0	A_44_P270056	NM_001007800	8031.94	328.304	3.990102e+002	4.013809e+001	423	42	7.706442e+000	0	0	0	0	0	0	356.13	1	1	46.1809	43.5484
DATA	1753	21	53	0	0	A_64_P059351	NM_001145175	8057.58	328.427	1.307394e+002	1.378688e+001	186	41	7.317873e+000	0	0	0	0	0	0	116.155	1	1	57.5363	41.4857
DATA	1754	21	54	0	0	A_42_P573441	NM_001105742	8082.73	328.137	1.130783e+004	1.130791e+003	10066.5	44	5.922479e+000	0	0	0	0	0	0	9999.81	1	1	48.2044	43.8636
DATA	1755	21	55	0	0	A_42_P485589	NM_017246	8108.18	328.361	3.588074e+002	3.615163e+001	382	45	8.615565e+000	0	0	0	0	0	0	315.807	1	1	47.8731	43.8065
DATA	1756	21	56	0	0	A_44_P149540	XM_223051	8133.44	328.028	2.294344e+004	2.294348e+003	20098	44	9.354524e+000	0	0	0	0	0	0	20096.3	1	1	48.2044	43.2593
DATA	1757	21	57	0	0	A_44_P323236	NM_001000513	8159.33	328.5	3.109955e+001	5.437745e+000	94.5	41	1.254780e+001	0	0	0	0	0	0	27.1065	1	1	57.5363	41.7742
DATA	1759	21	59	0	0	A_64_P100447	NM_001173469	8209.89	328.5	9.891626e+000	4.612322e+000	76	45	7.688278e+000	0	0	0	0	0	0	8.53668	1	0	56.9804	44.2647
DATA	1760	21	60	0	0	A_64_P150008	A_64_P150008	8235.5	328.5	1.064225e+002	1.156545e+001	158.5	42	8.375427e+000	0	0	0	0	0	0	91.3803	1	1	57.5363	42.1724
DATA	1761	21	61	0	0	A_42_P481696	NM_022508	8260.41	328.254	2.205160e+003	2.205629e+002	1937	43.5	9.314258e+000	0	0	0	1	0	0	1884.04	1	1	47.5395	44.7727
DATA	1762	21	62	0	0	A_64_P033755	AABR03073220	8286.33	328.5	8.655174e+001	9.789452e+000	143	39	6.964122e+000	0	0	0	0	0	0	73.5695	1	1	57.5363	39.7813
DATA	1763	21	63	0	0	A_64_P115980	NM_001109458	8311.37	328.37	2.952493e+002	2.988066e+001	322	39.5	9.241387e+000	0	0	0	0	0	0	249.709	1	1	48.2044	39.625
DATA	1764	21	64	0	0	A_64_P001426	NM_001126301	8336.62	328.623	2.339107e+002	2.384293e+001	265	41.5	8.614749e+000	0	0	0	0	0	0	196.85	1	1	49.5074	41.7059
DATA	1765	21	65	0	0	A_64_P012987	NM_001108668	8362.11	328.352	2.045316e+003	2.045843e+002	1789	39	6.076214e+000	0	0	0	0	0	0	1712.53	1	1	47.8731	39.9744
DATA	1767	21	67	0	0	A_42_P668289	TC585832	8413.05	328.527	3.394481e+003	3.394805e+002	2885	41	1.017091e+001	0	0	0	0	0	0	2814.18	1	1	53.8203	40.7742
DATA	1768	21	68	0	0	A_64_P052690	ENSRNOT00000036634	8438.5	328.5	1.021133e+003	1.022220e+002	929.5	41	1.105079e+001	0	0	0	0	0	0	842.458	1	1	57.5363	42.4063
DATA	1769	21	69	0	0	A_42_P593020	NM_013413	8463.89	328.5	8.038244e+001	9.329181e+000	132.5	41	1.034789e+001	0	0	0	0	0	0	66.0021	1	1	56.9804	41.3103
DATA	1770	21	70	0	0	A_64_P037303	NM_001127530	8489.11	328.352	1.083395e+003	1.084439e+002	934	42	9.586697e+000	0	0	0	0	0	0	885.44	1	1	47.8731	41.1429
DATA	1771	21	71	0	0	A_44_P684180	NM_001037363	8514.63	328.63	1.189658e+004	1.189668e+003	9443.5	40	7.357840e+000	0	0	0	0	0	0	9679.03	1	1	48.2044	40.2571
DATA	1772	21	72	0	0	A_64_P104743	NM_133518	8540.23	328.192	3.076601e+002	3.113826e+001	321	47	1.388242e+001	0	0	0	0	0	0	249.178	1	1	48.2044	45.6897
DATA	1773	21	73	0	0	A_44_P941132	NM_001108128	8565.31	328.338	7.891638e+003	7.891785e+002	6217.5	49	1.236121e+001	0	0	0	0	0	0	6364.84	1	1	48.5334	46.5588
DATA	1774	21	74	0	0	A_44_P187080	NM_001110823	8590.75	328.627	3.191642e+004	3.191645e+003	25007	49	1.054198e+001	0	0	0	0	0	0	25637.4	1	1	49.1849	47
DATA	1775	21	75	0	0	A_42_P574960	ENSRNOT00000068719	8616.39	328.594	1.058819e+003	1.059933e+002	922	49	7.224326e+000	0	0	0	0	0	0	847.146	1	1	47.5395	47.037
DATA	1776	21	76	0	0	A_64_P094850	A_64_P094850	8641.58	328.573	9.080969e+001	1.030790e+001	140.5	49	9.807632e+000	0	0	0	0	0	0	72.3874	1	1	57.5363	50.5
DATA	1777	21	77	0	0	A_43_P13418	NM_172042	8667.29	328.4	6.994239e+003	6.994411e+002	5605	48.5	1.067510e+001	0	0	0	0	0	0	5555.39	1	1	46.8651	49.4286
DATA	1778	21	78	66	-1	(-)3xSLv1	NegativeControl	8692.5	328.648	4.931618e+000	4.910540e+000	62	44	1.288262e+001	0	0	0	0	0	0	-6.74172	0	0	65	47.1905
DATA	1779	21	79	0	0	A_44_P321594	ENSRNOT00000006966	8717.61	328.931	6.417113e+001	8.089132e+000	118	47	8.962915e+000	0	0	0	0	0	0	50.6592	1	1	53.8203	47.5769
DATA	1780	21	80	0	0	A_44_P792531	NM_001025700	8743.16	328.897	2.288683e+002	2.341359e+001	246.5	44.5	1.123157e+001	0	0	0	0	0	0	180.178	1	1	46.5243	45.7
DATA	1781	21	81	0	0	A_43_P14795	NM_001044248	8768.65	328.933	1.189043e+003	1.190073e+002	1003	44.5	1.176010e+001	0	0	0	0	0	0	933.788	1	1	49.1849	46.1
DATA	1782	21	82	0	0	A_42_P671502	NM_053467	8793.8	329	8.875230e+003	8.875368e+002	6928	49	1.063146e+001	0	0	0	1	0	0	6955.31	1	1	49.1849	46.8065
DATA	1783	21	83	66	1	DarkCorner	DarkCorner	8819.44	329.086	4.991421e+000	4.970087e+000	59	41	6.829197e+000	0	0	0	0	0	0	-10.2949	0	0	49.8279	41.931
DATA	1784	21	84	66	1	DarkCorner	DarkCorner	8844.63	329.386	4.998283e+000	4.976920e+000	59	44.5	8.867605e+000	0	0	0	0	0	0	-8.85083	0	0	41.4593	45.5263
DATA	1785	21	85	66	1	DarkCorner	DarkCorner	8870.82	329.365	5.003863e+000	4.982477e+000	60	42.5	9.126566e+000	0	0	0	0	0	0	-7.92521	0	0	47.8731	42.6296
DATA	1786	22	1	66	1	DarkCorner	DarkCorner	6749.84	334.943	4.374742e+000	4.356044e+000	59	42	8.719132e+000	0	0	0	0	0	0	-1.55286	0	0	46.8651	43.0233
DATA	1787	22	2	66	1	DarkCorner	DarkCorner	6775.42	334.573	4.356149e+000	4.337530e+000	61	47	8.515111e+000	0	0	0	0	0	0	-1.60904	0	0	57.5363	46.7407
DATA	1788	22	3	66	1	DarkCorner	DarkCorner	6800.23	334.573	4.338302e+000	4.319759e+000	61	44	8.330476e+000	0	0	0	0	0	0	-2.21728	0	0	52.6241	43.2857
DATA	1789	22	4	0	0	A_42_P704824	NM_001009640	6826.09	334.614	2.800583e+002	2.833428e+001	317	45	1.024055e+001	0	0	0	0	0	0	253.117	1	1	57.259	43.6857
DATA	1790	22	5	0	0	A_42_P517554	NM_001107060	6851.08	334.576	1.796889e+002	1.847273e+001	226	44	1.045033e+001	0	0	0	0	0	0	163.041	1	1	45.1352	42.9302
DATA	1791	22	6	0	0	A_42_P586883	NM_001106416	6876.54	334.786	8.672157e+001	9.665596e+000	141	39.5	8.935668e+000	0	0	0	0	0	0	78.9951	1	1	47.2035	38.6154
DATA	1792	22	7	0	0	A_64_P060302	BF559343	6902	334.797	4.354822e+002	4.375533e+001	467	40.5	6.831301e+000	0	0	0	0	0	0	398.172	1	1	46.8651	40.8333
DATA	1793	22	8	0	0	A_64_P055418	NM_001025641	6927.5	335	2.120945e+001	4.737982e+000	82.5	46	7.675404e+000	0	0	0	0	0	0	19.4631	1	1	54.1152	45.6129
DATA	1794	22	9	0	0	A_44_P317600	NM_012612	6953.01	334.811	2.118560e+002	2.160224e+001	256	48	7.898142e+000	0	0	0	0	0	0	195.083	1	1	47.2035	48.2258
DATA	1795	22	10	0	0	A_44_P433359	NM_022710	6978.5	335	4.079960e+002	4.101604e+001	441	39	8.021258e+000	0	0	0	0	0	0	376.952	1	1	54.1152	40.4167
DATA	1796	22	11	0	0	A_42_P788480	NM_019194	7003.5	335	1.423255e+004	1.423261e+003	13009	38	9.594972e+000	0	0	0	0	0	0	13190.4	1	1	48.5334	41.2857
DATA	1797	22	12	0	0	A_44_P269808	NM_001025281	7029.5	335	1.028508e+002	1.110291e+001	161	47	1.018866e+001	0	0	0	0	0	0	95.6109	1	1	65	47.0606
DATA	1798	22	13	0	0	A_64_P108165	NM_001108889	7054.5	335	3.148420e+001	5.225691e+000	98	44	1.194972e+001	0	0	0	0	0	0	29.349	1	1	54.1152	47.0645
DATA	1799	22	14	0	0	A_42_P581567	NM_001011899	7080.07	334.9	2.631789e+002	2.664461e+001	317	46	1.063344e+001	0	0	0	0	0	0	245.979	1	1	46.8651	44.4848
DATA	1800	22	15	0	0	A_42_P746029	NM_144748	7105.22	335.075	7.084491e+001	8.210303e+000	130	43	6.676713e+000	0	0	0	0	0	0	66.3775	1	1	45.835	42.6129
DATA	1801	22	16	0	0	A_42_P481087	XM_232226	7130.68	334.988	1.795423e+003	1.795901e+002	1805.5	42.5	8.816167e+000	0	0	0	0	0	0	1686.01	1	1	49.1849	42.7813
DATA	1802	22	17	0	0	A_64_P031020	ENSRNOT00000032728	7156.39	335.069	9.581011e+000	4.241113e+000	72.5	47.5	1.266424e+001	0	0	0	0	0	0	9.01619	1	0	53.8203	48.5625
DATA	1803	22	18	0	0	A_44_P344228	NM_183051	7181.29	334.984	4.714467e+001	6.263605e+000	108	48	9.102023e+000	0	0	0	0	0	0	44.4469	1	1	45.4864	48.6944
DATA	1804	22	19	0	0	A_64_P009798	NM_021742	7206.91	335.386	4.134370e+000	4.116699e+000	66	43.5	8.169291e+000	0	0	0	0	0	0	-0.238988	0	0	57.259	43.0417
DATA	1805	22	20	0	0	A_44_P775747	ENSRNOT00000051510	7232.07	334.803	2.850728e+004	2.850731e+003	27730	46	8.586900e+000	0	0	0	0	0	0	26960.8	1	1	44.7812	47.2121
DATA	1806	22	21	0	0	A_44_P349475	NM_031333	7257.07	334.896	2.629456e+003	2.629776e+002	2457.5	48	8.875014e+000	0	0	0	0	0	0	2489.98	1	1	46.8651	48.8929
DATA	1807	22	22	0	0	A_64_P114198	NM_001080153	7282.69	334.687	2.244021e+003	2.244396e+002	2197	42	9.305584e+000	0	0	0	0	0	0	2127.24	1	1	45.835	43.5957
DATA	1808	22	23	0	0	A_42_P719060	NM_001108994	7308.5	335.352	3.639496e+003	3.639726e+002	3552	42	9.293026e+000	0	0	0	0	0	0	3453.38	1	1	57.5363	43.4615
DATA	1809	22	24	0	0	A_44_P163243	NM_175759	7333.91	335.386	4.112340e+000	4.094764e+000	64	46	9.766191e+000	0	0	0	0	0	0	-3.04695	0	0	57.259	45.3871
DATA	1810	22	25	0	0	A_44_P156864	A_44_P156864	7359.42	335.427	1.377620e+002	1.437136e+001	200	45	5.924742e+000	0	0	0	0	0	0	130.861	1	1	57.5363	44.4444
DATA	1811	22	26	0	0	A_42_P758052	NM_001031645	7384.5	335.056	4.621846e+003	4.622027e+002	4415.5	45	9.228579e+000	0	0	0	0	0	0	4391.11	1	1	48.5334	47.8
DATA	1812	22	27	0	0	A_44_P280659	NM_001100971	7410.05	335.477	1.810983e+002	1.856637e+001	238.5	43.5	7.565655e+000	0	0	0	0	0	0	172.067	1	1	55.8519	44.25
DATA	1813	22	28	0	0	A_42_P768380	NM_001100158	7435.21	335.242	6.636818e+003	6.636944e+002	6203	40.5	7.051868e+000	0	0	0	0	0	0	6304.42	1	1	45.835	40.1071
DATA	1814	22	29	0	0	A_44_P486312	NM_144737	7460.63	334.735	7.746020e+002	7.756836e+001	816	39	6.382205e+000	0	0	0	0	0	0	735.459	1	1	46.5243	38.8056
DATA	1815	22	30	0	0	A_64_P005288	XM_575125	7486.09	334.672	1.810363e+002	1.856153e+001	242	41	8.528499e+000	0	0	0	0	0	0	171.778	1	1	45.1352	40.1471
DATA	1816	22	31	0	0	A_64_P101885	ENSRNOT00000058341	7511.42	334.881	7.286179e+002	7.297710e+001	751	43	7.881012e+000	0	0	0	0	0	0	690.788	1	1	46.1809	42.4
DATA	1817	22	32	0	0	A_64_P113645	ENSRNOT00000055538	7537.05	335.477	4.122573e+000	4.104953e+000	67	41	9.859844e+000	0	0	0	0	0	0	-0.429154	0	0	55.8519	42.2963
DATA	1818	22	33	0	0	A_42_P588869	NM_001008348	7562.17	335.3	3.242599e+003	3.242859e+002	3193	40	7.406286e+000	0	0	0	1	0	0	3067.24	1	1	47.2035	40.3095
DATA	1819	22	34	0	0	A_64_P028027	NM_001000473	7587.67	335.5	4.884148e+001	6.387333e+000	113	38	8.942619e+000	0	0	0	0	0	0	46.1327	1	1	57.5363	40.5517
DATA	1820	22	35	0	0	A_42_P468805	NM_145721	7612.69	335.389	5.899550e+002	5.913941e+001	627	40	7.754832e+000	0	0	0	0	0	0	556.305	1	1	48.2044	39.9545
DATA	1821	22	36	0	0	A_42_P522194	NM_012914	7638.25	335.056	2.256185e+002	2.293693e+001	277	38.5	8.557849e+000	0	0	0	0	0	0	212.338	1	1	47.5395	39.0667
DATA	1822	22	37	0	0	A_64_P002969	A_64_P002969	7664.11	335.5	4.157444e+000	4.139675e+000	63	39	9.077329e+000	0	0	0	0	0	0	-3.43333	0	0	56.9804	38.8649
DATA	1823	22	38	0	0	A_42_P453935	NM_001198580	7689.16	335.103	5.854256e+003	5.854403e+002	5463.5	42	8.488740e+000	0	0	0	0	0	0	5485.58	1	1	46.5243	40.6061
DATA	1824	22	39	0	0	A_42_P523551	NM_001014087	7714.67	335.5	4.177238e+000	4.159384e+000	64	40	7.503340e+000	0	0	0	0	0	0	-0.142336	0	0	57.5363	39.5581
DATA	1825	22	40	0	0	A_64_P046076	NM_053952	7739.99	335.31	2.709026e+003	2.709347e+002	2564	40	7.531670e+000	0	0	0	0	0	0	2525.43	1	1	47.2035	41.1026
DATA	1826	22	41	0	0	A_42_P607770	NM_001134616	7765.19	335.412	9.244018e+003	9.244113e+002	8619.5	43.5	8.639702e+000	0	0	0	0	0	0	8593.23	1	1	46.5243	44.3889
DATA	1827	22	42	0	0	A_64_P089400	NM_022605	7791	335.545	2.771967e+002	2.803534e+001	326	42	8.919148e+000	0	0	0	0	0	0	256.892	1	1	55.8519	43.5526
DATA	1828	22	43	0	0	A_64_P072064	FQ221714	7816.42	335.573	1.132125e+005	1.132125e+004	103705	47	9.336942e+000	0	0	0	0	0	0	104583	1	1	57.5363	49.3871
DATA	1829	22	44	0	0	A_42_P555125	NM_012913	7841.44	335.521	1.510460e+004	1.510466e+003	13764	46	9.758933e+000	0	0	0	0	0	0	13906.8	1	1	48.2044	45.9333
DATA	1830	22	45	0	0	A_42_P768776	NM_001108443	7867	335.271	9.407001e+003	9.407096e+002	8620	46	9.129047e+000	0	0	0	0	0	0	8629.9	1	1	46.8651	47.6857
DATA	1831	22	46	0	0	A_42_P593930	NM_001195606	7892.58	335.573	2.765670e+001	5.073738e+000	93	45	7.740082e+000	0	0	0	0	0	0	25.2785	1	1	57.5363	44.1379
DATA	1832	22	47	0	0	A_64_P013545	NM_001115046	7917.91	335.258	4.768158e+002	4.787241e+001	498	44	7.541677e+000	0	0	0	0	0	0	434.125	1	1	45.835	43.5758
DATA	1833	22	48	0	0	A_42_P548520	NM_001100834	7943.12	335.418	4.831039e+003	4.831229e+002	4486	43	6.139472e+000	0	0	0	0	0	0	4381.18	1	1	46.1809	42.7143
DATA	1834	22	49	0	0	A_42_P692317	NM_001107565	7968.37	335.5	9.493076e+002	9.502831e+001	919.5	42	7.546272e+000	0	0	0	0	0	0	857.39	1	1	47.8731	40.6286
DATA	1835	22	50	0	0	A_64_P078303	NM_001106526	7994.42	335.573	4.236443e+001	6.053130e+000	104	38	7.434939e+000	0	0	0	0	0	0	38.096	1	1	57.5363	40.7241
DATA	1836	22	51	0	0	A_64_P031771	A_64_P031771	8019.52	335.328	5.473414e+001	6.986770e+000	117	42	5.457946e+000	0	0	0	0	0	0	49.0052	1	1	44.7812	42.5926
DATA	1837	22	52	0	0	A_44_P393929	NM_001039713	8044.61	335.648	1.732730e+002	1.786780e+001	220.5	40	7.271105e+000	0	0	0	0	0	0	154.457	1	1	47.8731	40.6
DATA	1838	22	53	0	0	A_44_P135730	XM_228802	8070.42	335.573	2.354983e+002	2.395405e+001	278	41	6.933165e+000	0	0	0	0	0	0	208.945	1	1	57.5363	39.9286
DATA	1839	22	54	0	0	A_43_P23215	NM_001025737	8095.2	335.521	3.912531e+002	3.937218e+001	412	45.5	9.506441e+000	0	0	0	0	0	0	345.553	1	1	47.5395	43.8
DATA	1840	22	55	0	0	A_64_P118427	A_64_P118427	8121.09	335.614	1.468137e+002	1.533329e+001	201	43	8.212639e+000	0	0	0	0	0	0	129.038	1	1	57.259	42.3243
DATA	1841	22	56	0	0	A_64_P075560	NM_001037526	8146.5	335.648	3.732503e+001	5.804231e+000	100	44	8.969242e+000	0	0	0	0	0	0	32.6476	1	1	57.5363	44.2963
DATA	1842	22	57	0	0	A_64_P150311	NM_177935	8171.92	336.077	6.449846e+001	7.845404e+000	126	45.5	1.145800e+001	0	0	0	0	0	0	56.1431	1	1	46.1809	42.7857
DATA	1843	22	58	0	0	A_44_P272393	NM_001106892	8197.08	336.056	1.299434e+002	1.374771e+001	181	44.5	9.060354e+000	0	0	0	0	0	0	112.556	1	1	46.8651	45.0294
DATA	1844	22	59	0	0	A_44_P421887	NM_001191565	8222.57	335.761	2.207810e+002	2.253429e+001	258	42	6.291564e+000	0	0	0	0	0	0	190.275	1	1	46.5243	41.8529
DATA	1845	22	60	0	0	A_64_P045102	A_64_P045102	8248.21	335.87	2.439970e+003	2.440391e+002	2248	38.5	9.332820e+000	0	0	0	0	0	0	2092.23	1	1	48.8603	40.6923
DATA	1846	22	61	0	0	A_42_P818546	NM_001191600	8273.16	335.629	1.480964e+003	1.481665e+002	1376	44	6.043391e+000	0	0	0	0	0	0	1263.58	1	1	44.0646	43.4516
DATA	1847	22	62	0	0	A_42_P777445	ENSRNOT00000012684	8298.7	335.547	7.725805e+001	8.981348e+000	136	40	9.069645e+000	0	0	0	0	0	0	65.5833	1	1	45.1352	41.4615
DATA	1848	22	63	0	0	A_64_P111709	NM_001000554	8324.5	336	2.153399e+002	2.202048e+001	246.5	42	9.691632e+000	0	0	0	0	0	0	181.88	1	1	54.1152	39.8857
DATA	1849	22	64	0	0	A_64_P107509	NM_001191874	8349.3	335.921	9.639191e+001	1.069168e+001	151.5	42	6.790648e+000	0	0	0	0	0	0	81.016	1	1	45.1352	42.625
DATA	1850	22	65	0	0	A_64_P121836	ENSRNOT00000007828	8375	336	4.428119e+001	6.420457e+000	109	39	8.482179e+000	0	0	0	0	0	0	37.0312	1	1	54.9904	40
DATA	1851	22	66	0	0	A_42_P684281	XR_008784	8400.09	335.896	2.873878e+003	2.874257e+002	2489	43	6.255131e+000	0	0	0	0	0	0	2391.64	1	1	46.8651	41.72
DATA	1852	22	67	0	0	A_64_P060804	ENSRNOT00000000462	8425.5	336	6.766519e+001	8.235580e+000	123.5	40	1.028893e+001	0	0	0	0	0	0	56.0384	1	1	54.1152	41.1724
DATA	1853	22	68	0	0	A_64_P075675	A_64_P075675	8451	336	3.709802e+002	3.739673e+001	372	42	1.152837e+001	0	0	0	0	0	0	305.763	1	1	46.8651	40.3548
DATA	1854	22	69	0	0	A_44_P254973	NM_198051	8476.5	335.719	8.231407e+001	9.498473e+000	130	38	6.149332e+000	0	0	0	0	0	0	67.5209	1	1	45.1352	38.2857
DATA	1855	22	70	0	0	A_42_P492976	NM_001126099	8501.79	335.873	7.434589e+002	7.449820e+001	669	41	7.951402e+000	0	0	0	0	0	0	607.086	1	1	46.8651	39.5313
DATA	1856	22	71	0	0	A_42_P619114	NM_001014204	8527.5	336	7.269325e+001	8.701576e+000	131.5	43	1.066727e+001	0	0	0	0	0	0	59.093	1	1	54.1152	43.1724
DATA	1857	22	72	0	0	A_42_P541625	NM_001126090	8552.63	335.735	2.736549e+004	2.736553e+003	21925	39.5	1.166850e+001	0	0	0	1	0	0	22149.6	1	1	46.5243	41.0769
DATA	1858	22	73	0	0	A_42_P469136	NM_001044288	8578.37	336.404	1.296592e+003	1.297488e+002	1110	51	9.991287e+000	0	0	0	1	0	0	1045.18	1	1	57.8122	48.6774
DATA	1859	22	74	0	0	A_64_P101480	ENSRNOT00000034261	8603.5	336.352	9.298292e+001	1.048359e+001	140.5	49	9.322272e+000	0	0	0	0	0	0	74.6572	1	1	65	46.6429
DATA	1860	22	75	0	0	A_64_P078554	ENSRNOT00000020079	8629.14	335.844	3.952341e+002	3.982127e+001	389	47.5	8.380396e+000	0	0	0	0	0	0	316.091	1	1	45.4864	47.9
DATA	1861	22	76	0	0	A_44_P131067	ENSRNOT00000045483	8654.38	336.068	1.858842e+001	5.220663e+000	84	49	1.004862e+001	0	0	0	0	0	0	14.8139	1	0	49.1849	49.7143
DATA	1862	22	77	0	0	A_64_P055699	ENSRNOT00000010871	8679.79	335.77	1.154119e+003	1.155157e+002	999	48	1.200688e+001	0	0	0	0	0	0	916.62	1	1	45.1352	48.3704
DATA	1863	22	78	0	0	A_64_P117203	NM_001106002	8705.09	336.104	1.549597e+004	1.549605e+003	12327	49	8.257925e+000	0	0	0	0	0	0	12269.8	1	1	46.8651	48.12
DATA	1864	22	79	0	0	A_44_P357870	NM_031559	8730.5	336.352	6.817600e+002	6.835359e+001	611	43	1.031056e+001	0	0	0	1	0	0	538.309	1	1	57.5363	44.3333
DATA	1865	22	80	0	0	A_42_P732101	NM_022624	8756	335.922	7.244547e+003	7.244715e+002	5672	48	1.221392e+001	0	0	0	0	0	0	5704.89	1	1	46.1809	47.5862
DATA	1866	22	81	0	0	A_64_P155054	XM_001062835	8781.42	336.427	8.914697e+001	1.019575e+001	140	46	8.549623e+000	0	0	0	0	0	0	70.0494	1	1	57.5363	47.1034
DATA	1867	22	82	0	0	A_44_P534154	NM_001108852	8806.58	336.427	1.764034e+002	1.832370e+001	208	44	1.034098e+001	0	0	0	0	0	0	138.345	1	1	65	44.6897
DATA	1868	22	83	66	1	DarkCorner	DarkCorner	8832.11	336.5	4.986713e+000	4.965399e+000	60	41	6.833289e+000	0	0	0	0	0	0	-9.8022	0	0	56.9804	42.2083
DATA	1869	22	84	66	1	DarkCorner	DarkCorner	8857.63	336.514	4.992940e+000	4.971600e+000	57	42.5	9.616378e+000	0	0	0	0	0	0	-9.94695	0	0	48.2044	43.6875
DATA	1870	22	85	66	1	DarkCorner	DarkCorner	8882.97	336.013	4.997829e+000	4.976468e+000	59	38	8.496398e+000	0	0	0	0	0	0	-8.14755	0	0	46.8651	38.2745
DATA	1871	23	1	66	1	DarkCorner	DarkCorner	6737.02	341.934	4.378767e+000	4.360135e+000	60	38	8.955362e+000	0	0	0	0	0	0	0.241452	0	0	44.4243	38.5673
DATA	1872	23	2	66	1	DarkCorner	DarkCorner	6763.18	342.284	4.359149e+000	4.340518e+000	61	44	8.179103e+000	0	0	0	0	0	0	-2.51654	0	0	47.8731	45.9091
DATA	1873	23	3	66	1	DarkCorner	DarkCorner	6787.91	342.065	4.341481e+000	4.322925e+000	61.5	45.5	7.595647e+000	0	0	0	0	0	0	-2.35873	0	0	54.4085	45.5769
DATA	1874	23	4	0	0	A_44_P246268	NM_001106862	6813.5	342	2.854330e+001	5.165361e+000	91.5	42	9.912114e+000	0	0	0	0	0	0	25.7774	1	1	54.1152	42.6
DATA	1875	23	5	0	0	A_64_P028396	ENSRNOT00000051835	6838.58	342.427	4.948015e+001	6.547356e+000	110	47	1.054412e+001	0	0	0	0	0	0	44.8658	1	1	57.5363	47.6129
DATA	1876	23	6	0	0	A_64_P020451	XM_219275	6864.37	342.404	3.205266e+001	5.339867e+000	93	42.5	9.630889e+000	0	0	0	0	0	0	29.1785	1	1	65	40.7333
DATA	1878	23	8	0	0	A_64_P106264	ENSRNOT00000029671	6914.79	341.976	3.277472e+003	3.277746e+002	3094	44	1.109169e+001	0	0	0	0	0	0	3005.4	1	1	51.0895	43.7778
DATA	1879	23	9	0	0	A_44_P524805	NM_214832	6940.42	342.427	3.263476e+001	5.338345e+000	93	46.5	8.900794e+000	0	0	0	0	0	0	30.0335	1	1	57.5363	47.5
DATA	1880	23	10	0	0	A_42_P764228	NM_031707	6965.48	342.147	4.276226e+003	4.276434e+002	4053.5	42.5	8.405584e+000	0	0	0	0	0	0	3948.26	1	1	49.8279	42.5769
DATA	1881	23	11	0	0	A_44_P533760	NM_182843	6990.72	342.16	2.489616e+003	2.489970e+002	2316	39	8.908539e+000	0	0	0	0	0	0	2306.01	1	1	49.1849	39.8276
DATA	1882	23	12	0	0	A_42_P524610	NM_001108992	7015.99	342.384	3.163199e+003	3.163475e+002	2946	45.5	1.042978e+001	0	0	0	0	0	0	2938.88	1	1	48.8603	45.2368
DATA	1883	23	13	0	0	A_42_P570756	NM_134345	7041.67	342.5	1.314450e+005	1.314450e+004	122076	49	1.597119e+001	0	0	0	0	0	0	122481	1	1	57.5363	51.6897
DATA	1884	23	14	0	0	A_44_P362969	NM_053688	7067.42	342.427	5.861353e+001	7.188186e+000	121.5	44	9.216920e+000	0	0	0	0	0	0	54.7657	1	1	57.5363	43.875
DATA	1885	23	15	0	0	A_44_P308197	NM_001012190	7092.3	342.1	3.489646e+003	3.489892e+002	3342	43	8.413123e+000	0	0	0	0	0	0	3268.5	1	1	47.2035	43.7742
DATA	1886	23	16	0	1	ETG05_36762	ETG05_36762	7118.05	342.477	4.368513e+001	6.019227e+000	104	43	6.603030e+000	0	0	0	1	0	0	41.016	1	1	55.8519	42
DATA	1887	23	17	0	0	A_42_P744033	NM_001100846	7143.5	342.5	5.178363e+002	5.194822e+001	545	45.5	1.388370e+001	0	0	0	0	0	0	487.25	1	1	57.5363	46.2188
DATA	1888	23	18	0	0	A_42_P726363	NM_031536	7168.67	342.5	2.280803e+001	4.712635e+000	88	52	7.626707e+000	0	0	0	0	0	0	21.5027	1	1	57.5363	51.4167
DATA	1889	23	19	0	0	A_64_P010393	NM_053363	7193.85	342.413	6.119017e+003	6.119156e+002	5682	47	6.456562e+000	0	0	0	0	0	0	5778.89	1	1	48.8603	47.5172
DATA	1890	23	20	0	0	A_42_P612220	NM_001191711	7219.47	342.303	1.014801e+003	1.015633e+002	1017.5	43.5	1.067336e+001	0	0	0	0	0	0	959.903	1	1	49.1849	45.0714
DATA	1891	23	21	0	0	A_44_P393551	NM_012567	7245.11	342.5	5.274012e+004	5.274013e+003	49852.5	47	1.033062e+001	0	0	0	0	0	0	49957.1	1	1	56.9804	47.6897
DATA	1892	23	22	0	0	A_44_P278688	NM_053682	7270.09	342.104	2.495514e+003	2.495851e+002	2424	45	9.246730e+000	0	0	0	0	0	0	2366.44	1	1	46.8651	45.8462
DATA	1893	23	23	0	0	A_44_P186989	NM_001000076	7295.67	342.5	1.049204e+001	4.228089e+000	74	42	8.189343e+000	0	0	0	0	0	0	9.95941	1	0	57.5363	42.5116
DATA	1894	23	24	0	0	A_42_P640277	NM_001003401	7321.33	342.5	4.201914e+004	4.201916e+003	40231	45	9.134402e+000	0	0	0	0	0	0	39916.2	1	1	57.5363	44.8611
DATA	1895	23	25	0	0	A_44_P398792	NM_053867	7346.35	342.222	1.832014e+004	1.832019e+003	17834	44.5	1.038083e+001	0	0	0	0	0	0	17412	1	1	47.5395	44.8077
DATA	1896	23	26	0	0	A_64_P052552	ENSRNOT00000056797	7372	342.545	1.143021e+002	1.213966e+001	174.5	43.5	6.910416e+000	0	0	0	0	0	0	108.676	1	1	65	45.0769
DATA	1897	23	27	0	0	A_64_P119254	NM_001013202	7397.47	343.108	4.106049e+000	4.088499e+000	64	45	9.976182e+000	0	0	0	0	0	0	-1.33751	0	0	48.5334	45.7037
DATA	1898	23	28	0	0	A_64_P159614	NM_053614	7422.69	342.622	3.009015e+003	3.009293e+002	2909	43	8.780748e+000	0	0	0	0	0	0	2860.95	1	1	48.5334	44.6923
DATA	1899	23	29	0	0	A_42_P814107	NM_001024750	7448.13	342.243	1.952594e+002	1.994982e+001	253	37.5	9.528769e+000	0	0	0	0	0	0	185.585	1	1	46.5243	38.65
DATA	1900	23	30	0	0	A_64_P150751	NM_212494	7473.25	342.356	7.034637e+002	7.046532e+001	750	38.5	8.094583e+000	0	0	0	0	0	0	668.271	1	1	48.5334	38.4118
DATA	1902	23	32	0	0	A_44_P838888	ENSRNOT00000038829	7524.33	342.424	7.727416e+001	8.747553e+000	138.5	39	7.620822e+000	0	0	0	0	0	0	73.2841	1	1	45.4864	39
DATA	1903	23	33	0	0	A_43_P12927	NM_053769	7549.19	342.657	5.532424e+002	5.547626e+001	598	39	8.064091e+000	0	0	0	0	0	0	524.092	1	1	47.2035	39.3793
DATA	1904	23	34	0	0	A_64_P140806	A_64_P140806	7574.75	342.644	3.363482e+004	3.363484e+003	32218	39	7.824412e+000	0	0	0	0	0	0	31818.7	1	1	48.5334	40.0833
DATA	1905	23	35	0	0	A_42_P607026	NM_001106839	7600	342.729	7.040687e+003	7.040808e+002	6675	40	7.338743e+000	0	0	0	0	0	0	6650.16	1	1	46.8651	40.5
DATA	1906	23	36	0	0	A_44_P272186	NM_001107950	7626	342.545	4.214899e+001	5.896725e+000	103	40	6.975192e+000	0	0	0	0	0	0	39.7377	1	1	55.8519	40.2059
DATA	1907	23	37	0	0	A_44_P226658	NM_017046	7651.42	342.573	6.506111e+001	7.707343e+000	131	39	1.079655e+001	0	0	0	0	0	0	61.2174	1	1	57.5363	40.9677
DATA	1908	23	38	0	0	A_64_P119279	NM_001108109	7676.63	342.63	1.467912e+004	1.467918e+003	13666	43.5	8.523213e+000	0	0	0	0	0	0	13782.1	1	1	48.2044	41.5
DATA	1909	23	39	0	0	A_44_P1042876	NM_212504	7701.95	342.534	2.501897e+003	2.502242e+002	2353	40	7.538712e+000	0	0	0	0	0	0	2343.42	1	1	48.5334	39.2619
DATA	1910	23	40	0	0	A_64_P119607	ENSRNOT00000037601	7727.67	342.547	3.519481e+002	3.544001e+001	397.5	40	8.052779e+000	0	0	0	0	0	0	328.798	1	1	49.1849	40.6136
DATA	1911	23	41	0	0	A_42_P784252	NM_133557	7752.69	342.662	1.122677e+004	1.122685e+003	10372	42.5	8.408056e+000	0	0	0	1	0	0	10460	1	1	48.5334	42.8333
DATA	1912	23	42	0	0	A_44_P1033194	NM_139328	7778	343	3.498183e+003	3.498434e+002	3348.5	43	1.058733e+001	0	0	0	0	0	0	3249.86	1	1	46.8651	43.7297
DATA	1913	23	43	0	0	A_42_P800048	NM_207610	7803.5	342.648	7.336058e+003	7.336179e+002	6611.5	43	8.066686e+000	0	0	0	0	0	0	6793.74	1	1	57.5363	44
DATA	1914	23	44	0	0	A_43_P11525	NM_012710	7829.09	342.935	6.073459e+001	7.391101e+000	126	50.5	9.957976e+000	0	0	0	0	0	0	56.0607	1	1	54.4085	49.75
DATA	1915	23	45	0	0	A_64_P019037	NM_001013886	7854.5	343	4.995443e+004	4.995445e+003	44378	46	9.322603e+000	0	0	0	0	0	0	45951.4	1	1	54.1152	45.8286
DATA	1916	23	46	0	0	A_64_P003378	NM_001024336	7880.04	342.973	3.995772e+002	4.018226e+001	428	45	8.734837e+000	0	0	0	0	0	0	366.224	1	1	46.8651	44.6563
DATA	1917	23	47	0	0	A_44_P258855	NM_053431	7905.06	342.687	4.809715e+003	4.809903e+002	4492	43	8.138094e+000	0	0	0	0	0	0	4391.76	1	1	45.835	42
DATA	1918	23	48	0	1	ETG09_35454	ETG09_35454	7930.5	343	1.780330e+001	4.630402e+000	82	44	9.261218e+000	0	0	0	0	0	0	16.1933	1	0	54.1152	43.8125
DATA	1919	23	49	0	0	A_64_P089677	NM_001105977	7956	343	1.986723e+002	2.032553e+001	254.5	42	6.299562e+000	0	0	0	0	0	0	179.973	1	1	65	41.8438
DATA	1920	23	50	0	0	A_64_P013609	A_64_P013609	7981.5	343	3.544276e+001	5.580095e+000	97	41.5	1.038449e+001	0	0	0	0	0	0	31.9722	1	1	54.1152	42.9688
DATA	1921	23	51	0	0	A_44_P357470	NM_030849	8006.53	342.88	1.129529e+003	1.130358e+002	1053	42	5.459853e+000	0	0	0	0	0	0	1014.6	1	1	48.8603	41.68
DATA	1922	23	52	0	0	A_44_P404064	ENSRNOT00000015387	8031.94	342.884	1.476482e+003	1.477122e+002	1387	40.5	5.496080e+000	0	0	0	0	0	0	1320.4	1	1	46.8651	40
DATA	1923	23	53	0	0	A_64_P092167	A_64_P092167	8057.65	343.113	3.645129e+001	5.688625e+000	99	42	6.048416e+000	0	0	0	0	0	0	32.45	1	1	44.4243	40
DATA	1924	23	54	0	0	A_42_P463036	ENSRNOT00000038596	8082.72	342.905	3.557037e+003	3.557307e+002	3112.5	42	8.117266e+000	0	0	0	0	0	0	3152.07	1	1	48.8603	39.84
DATA	1925	23	55	0	0	A_44_P1003794	NM_012576	8108.43	342.81	3.230164e+003	3.230465e+002	2888	45	7.910220e+000	0	0	0	0	0	0	2848.76	1	1	49.5074	41.5938
DATA	1926	23	56	0	0	A_64_P099006	BC105831	8133.92	342.85	4.448660e+000	4.429809e+000	67.5	43	8.473185e+000	0	0	0	0	0	0	0.33381	0	0	44.4243	42.2222
DATA	1927	23	57	0	0	A_42_P795467	NM_001108055	8159.24	343	7.818335e+002	7.830995e+001	757	46	1.003446e+001	0	0	0	1	0	0	682.919	1	1	46.8651	44.2381
DATA	1928	23	58	0	0	A_42_P629321	NM_031590	8184.5	343.352	2.999250e+002	3.032415e+001	334.5	44.5	1.039142e+001	0	0	0	0	0	0	260.717	1	1	57.5363	45.3077
DATA	1929	23	59	0	0	A_42_P549786	NM_022609	8210.06	343.045	6.367777e+003	6.367936e+002	5553	45	7.322817e+000	0	0	0	0	0	0	5507.56	1	1	46.8651	43.9032
DATA	1930	23	60	0	0	A_64_P006354	ENSRNOT00000043959	8235.42	343.427	8.524148e+001	9.647146e+000	140	40	6.103803e+000	0	0	0	0	0	0	73.3644	1	1	57.5363	39.5556
DATA	1931	23	61	0	0	A_64_P057109	A_64_P057109	8260.63	342.735	1.329230e+003	1.330006e+002	1228	42.5	9.267340e+000	0	0	0	0	0	0	1138.22	1	1	46.5243	44.4286
DATA	1932	23	62	0	0	A_44_P101361	NM_032070	8286.42	343.427	1.042046e+001	4.680529e+000	76.5	42.5	7.259032e+000	0	0	0	0	0	0	8.87867	1	0	57.5363	41.875
DATA	1933	23	63	0	0	A_64_P103354	ENSRNOT00000066893	8311.19	342.75	8.541352e+002	8.553655e+001	807	40	1.015232e+001	0	0	0	0	0	0	724.126	1	1	45.1352	40.1053
DATA	1934	23	64	0	0	A_42_P746868	NM_001127580	8336.63	343	2.919547e+004	2.919550e+003	24422	43	6.279639e+000	0	0	0	0	0	0	24628.9	1	1	48.5334	43.2143
DATA	1935	23	65	0	0	A_42_P707838	NM_012979	8362.09	342.818	3.573041e+003	3.573341e+002	2929	40	7.230458e+000	0	0	0	0	0	0	2999.07	1	1	45.835	40.1316
DATA	1936	23	66	0	0	A_42_P628098	NM_001107991	8387.75	343.118	1.829208e+003	1.829801e+002	1631	40	7.003225e+000	0	0	0	0	0	0	1527.81	1	1	51.4001	40.6129
DATA	1937	23	67	0	0	A_64_P028071	ENSRNOT00000042928	8413.11	343.5	3.275918e+005	3.275918e+004	277911	40	8.996191e+000	0	0	0	0	0	0	272305	1	1	56.9804	40.3125
DATA	1938	23	68	0	0	A_64_P002944	A_64_P002944	8438.64	343.13	8.731904e+003	8.732031e+002	7364	41	9.286206e+000	0	0	0	0	0	0	7222.81	1	1	46.8651	40.1852
DATA	1939	23	69	0	0	A_64_P072159	XM_574060	8464.22	342.78	2.344327e+001	5.272752e+000	86.5	38	9.228233e+000	0	0	0	0	0	0	19.2985	1	0	43.7019	38.4688
DATA	1940	23	70	0	0	A_64_P052365	NM_001109318	8489.45	342.851	2.417450e+002	2.463570e+001	268	39	6.980210e+000	0	0	0	0	0	0	198.096	1	1	46.1809	39.16
DATA	1941	23	71	0	0	A_64_P023150	ENSRNOT00000042777	8514.58	343.427	2.147363e+002	2.199601e+001	247	43.5	8.508548e+000	0	0	0	0	0	0	175.201	1	1	57.5363	42.6538
DATA	1942	23	72	0	0	A_44_P374902	NM_133429	8540.26	343.016	7.736483e+002	7.751277e+001	708	37	9.021342e+000	0	0	0	0	0	0	628.38	1	1	45.4864	36.2308
DATA	1943	23	73	0	0	A_44_P163271	NM_198733	8565.5	343.5	1.119233e+001	4.934981e+000	77	40	1.168530e+001	0	0	0	0	0	0	9.05354	1	0	65	42.2903
DATA	1944	23	74	0	0	A_42_P548520	NM_001100834	8590.82	343.361	4.871189e+003	4.871428e+002	4016	48.5	9.725485e+000	0	0	0	0	0	0	3924.33	1	1	47.8731	45.9667
DATA	1945	23	75	0	0	A_64_P012154	XM_225935	8616.25	343.559	3.345505e+001	5.887453e+000	95	46.5	9.710269e+000	0	0	0	0	0	0	26.8488	1	1	42.9674	45.9688
DATA	1946	23	76	0	0	A_64_P033574	NM_001000606	8641.5	343.5	4.883209e+000	4.865691e+000	69	52	1.162457e+001	0	0	0	0	0	0	1.444	0	0	57.5363	53.5455
DATA	1947	23	77	0	0	A_64_P027764	NM_022685	8667.11	343.5	3.755336e+002	3.786901e+001	363	47	1.024952e+001	0	0	0	0	0	0	299.231	1	1	56.9804	47.0882
DATA	1948	23	78	0	0	A_42_P484738	NM_022266	8692.5	343.258	4.033049e+003	4.033346e+002	3300.5	47	9.471956e+000	0	0	0	0	0	0	3203.1	1	1	46.5243	45.4444
DATA	1949	23	79	0	0	A_64_P036355	NM_053311	8717.84	343.118	2.140608e+004	2.140614e+003	17122.5	46	8.149249e+000	0	0	0	0	0	0	16950.2	1	1	46.5243	47.5556
DATA	1950	23	80	0	0	A_42_P694928	NM_001109046	8743.3	343.299	3.254294e+002	3.291321e+001	327.5	44.5	1.192486e+001	0	0	0	1	0	0	257.003	1	1	45.835	43.7333
DATA	1951	23	81	0	0	A_42_P588738	NM_133542	8768.5	343.5	8.879360e+001	1.015841e+001	139	44	1.026970e+001	0	0	0	0	0	0	69.9596	1	1	57.5363	44.2188
DATA	1952	23	82	0	0	A_64_P141254	XM_001060542	8794	343.545	4.220358e+001	6.501045e+000	101.5	43	9.307718e+000	0	0	0	0	0	0	33.1824	1	1	55.8519	44.3143
DATA	1953	23	83	0	0	A_42_P546054	NM_001013873	8819.26	343.435	3.494494e+002	3.529430e+001	352.5	47	8.690779e+000	0	0	0	1	0	0	274.265	1	1	46.8651	45.5652
DATA	1954	23	84	66	1	DarkCorner	DarkCorner	8844.58	343.573	4.981804e+000	4.960512e+000	60	45	8.845751e+000	0	0	0	0	0	0	-7.80896	0	0	57.5363	45.2258
DATA	1955	23	85	66	1	DarkCorner	DarkCorner	8870.33	343.5	4.987120e+000	4.965804e+000	60	40	8.796182e+000	0	0	0	0	0	0	-9.48565	0	0	57.5363	40.7963
DATA	1956	24	1	66	1	DarkCorner	DarkCorner	6749.67	349.5	4.363413e+000	4.344764e+000	60	40.5	6.281212e+000	0	0	0	0	0	0	-2.09646	0	0	57.5363	40.5435
DATA	1957	24	2	66	1	DarkCorner	DarkCorner	6775.33	349.5	4.344854e+000	4.326284e+000	60.5	47	9.319363e+000	0	0	0	0	0	0	-2.06873	0	0	57.5363	48.0357
DATA	1958	24	3	0	0	A_64_P000371	NM_017308	6800.68	349.395	1.448711e+003	1.449352e+002	1375	43.5	1.009387e+001	0	0	0	0	0	0	1307.27	1	1	49.5074	43.9
DATA	1959	24	4	0	0	A_42_P772356	NM_001191597	6826.11	349.5	6.439429e+003	6.439572e+002	5978	42	9.064505e+000	0	0	0	0	0	0	5834.29	1	1	56.9804	42.3704
DATA	1961	24	6	0	0	A_42_P470757	NM_001004075	6876.5	349.265	4.669083e+003	4.669277e+002	4303	44	7.797510e+000	0	0	0	0	0	0	4262.68	1	1	46.5243	43.6316
DATA	1962	24	7	0	0	A_64_P034250	ENSRNOT00000041464	6902.34	349.117	5.768197e+001	7.160540e+000	116	36	9.515625e+000	0	0	0	0	0	0	52.8574	1	1	49.8279	37.2667
DATA	1963	24	8	0	0	A_64_P065063	NM_012954	6927.58	349.573	9.845381e+001	1.071467e+001	152	47	7.762599e+000	0	0	0	0	0	0	90.5432	1	1	57.5363	46.9643
DATA	1964	24	9	0	0	A_64_P088866	ENSRNOT00000049194	6953	349.545	5.668332e+002	5.683969e+001	599	43	8.465304e+000	0	0	0	0	0	0	523.064	1	1	55.8519	45.4286
DATA	1965	24	10	0	0	A_44_P111759	NM_001000956	6978.42	349.573	1.424011e+001	4.434415e+000	76.5	44	9.369552e+000	0	0	0	0	0	0	13.1834	1	0	57.5363	42.7333
DATA	1966	24	11	0	0	A_64_P045019	ENSRNOT00000032417	7003.54	349.614	1.517811e+003	1.518388e+002	1524	40.5	1.014785e+001	0	0	0	0	0	0	1409.5	1	1	47.5395	41.6429
DATA	1967	24	12	0	0	A_64_P138989	XM_001053562	7029.42	349.573	9.820531e+001	1.067084e+001	154	48	1.269913e+001	0	0	0	0	0	0	91.4697	1	1	57.5363	47.963
DATA	1968	24	13	0	0	A_42_P537715	NM_001025743	7054.24	349.286	3.159546e+003	3.159820e+002	2917.5	46	8.468309e+000	0	0	0	0	0	0	2950.7	1	1	46.8651	46.5926
DATA	1969	24	14	0	0	A_42_P453171	NM_001107063	7079.39	349.333	2.507460e+003	2.507803e+002	2362.5	44	8.562721e+000	0	0	0	0	0	0	2347.76	1	1	47.2035	44.9655
DATA	1971	24	16	0	0	A_64_P096157	ENSRNOT00000059486	7130.58	349.573	2.034099e+002	2.075659e+001	254	45	1.047011e+001	0	0	0	0	0	0	191.356	1	1	57.5363	46.1379
DATA	1972	24	17	0	0	A_43_P10076	NM_031665	7155.69	349.532	1.901629e+004	1.901634e+003	17338	51	1.391109e+001	0	0	0	0	0	0	17925.6	1	1	49.8279	52.5
DATA	1974	24	19	0	0	A_42_P772878	NM_001011936	7206.48	349.853	4.352465e+003	4.352659e+002	4036.5	42	8.537018e+000	0	0	0	0	0	0	4117.43	1	1	49.8279	43.4545
DATA	1976	24	21	0	0	A_44_P447394	NM_019193	7257.44	349.733	7.763811e+003	7.763920e+002	7247.5	49.5	9.267976e+000	0	0	0	0	0	0	7364.52	1	1	49.1849	50.1538
DATA	1977	24	22	0	0	A_42_P504250	NM_001134987	7283.03	349.785	1.448958e+003	1.449536e+002	1439	42	8.474208e+000	0	0	0	1	0	0	1375.9	1	1	45.835	42.7073
DATA	1978	24	23	0	0	A_42_P675802	NM_145777	7308.14	349.789	2.024228e+003	2.024641e+002	1898	46	1.008821e+001	0	0	0	1	0	0	1923.78	1	1	47.2035	44.6829
DATA	1979	24	24	0	0	A_64_P111843	XM_001074913	7333.91	349.935	1.846973e+003	1.847425e+002	1796.5	43.5	1.057159e+001	0	0	0	0	0	0	1756.48	1	1	54.4085	43.6176
DATA	1980	24	25	0	0	A_44_P118724	NM_019361	7358.92	349.901	1.601178e+004	1.601183e+003	15382	43.5	7.980071e+000	0	0	0	0	0	0	15233.7	1	1	46.8651	44.1923
DATA	1981	24	26	0	0	A_43_P21749	NM_001108329	7384.49	349.881	6.053565e+001	7.303285e+000	123	41	8.814970e+000	0	0	0	0	0	0	57.6062	1	1	46.1809	43
DATA	1982	24	27	0	0	A_43_P11879	NM_017250	7410.04	349.841	7.301799e+001	8.367116e+000	131	40	6.942698e+000	0	0	0	0	0	0	69.4844	1	1	46.8651	40.1429
DATA	1983	24	28	0	0	A_64_P023182	NM_001000033	7435.25	349.55	6.262863e+000	4.134320e+000	68	41	1.096858e+001	0	0	0	0	0	0	5.95836	1	0	42.9674	41.122
DATA	1985	24	30	0	0	A_44_P368461	NM_001107085	7486.05	349.892	2.205091e+001	4.647241e+000	89	40	8.810687e+000	0	0	0	0	0	0	20.9574	1	1	45.835	39.75
DATA	1986	24	31	0	0	A_64_P097257	A_64_P097257	7511.75	349.791	1.006988e+002	1.087042e+001	162	42.5	8.325776e+000	0	0	0	0	0	0	95.6222	1	1	46.1809	41.1875
DATA	1987	24	32	0	0	A_64_P100634	NM_001100171	7536.81	349.783	3.056174e+002	3.083534e+001	358	39	8.975767e+000	0	0	0	0	0	0	289.907	1	1	46.1809	39.4242
DATA	1988	24	33	0	0	A_64_P041902	NM_001025653	7562.09	350.104	3.290664e+003	3.290920e+002	3215	38	7.485839e+000	0	0	0	0	0	0	3117.69	1	1	46.8651	38.7436
DATA	1990	24	35	0	0	A_64_P116171	NM_001004266	7613.09	350.104	1.434971e+002	1.492851e+001	202	40	8.845352e+000	0	0	0	0	0	0	135.525	1	1	46.8651	40.9024
DATA	1991	24	36	0	0	A_44_P243279	NM_001134780	7638.35	349.88	4.595290e+002	4.613762e+001	502	40	1.170380e+001	0	0	0	0	0	0	433.18	1	1	48.8603	41.5135
DATA	1992	24	37	0	0	A_64_P151468	XM_001062494	7664	350.319	2.888717e+001	5.042353e+000	93	39	9.623324e+000	0	0	0	0	0	0	27.175	1	1	65	39.4138
DATA	1993	24	38	0	0	A_64_P075769	ENSRNOT00000043984	7689.13	349.855	6.317346e+003	6.317481e+002	6133	43	8.887438e+000	0	0	0	0	0	0	5929.25	1	1	45.4864	41.1143
DATA	1994	24	39	0	0	A_42_P508921	NM_031703	7714.58	350.427	4.170202e+000	4.152378e+000	63	40	8.276432e+000	0	0	0	0	0	0	-2.59692	0	0	65	40.641
DATA	1995	24	40	0	0	A_44_P503376	NM_001000274	7740.42	350.427	4.181481e+000	4.163609e+000	67	39.5	7.737009e+000	0	0	0	0	0	0	-0.0605785	0	0	57.5363	40.2368
DATA	1996	24	41	0	0	A_64_P093088	NM_001000816	7765.5	350.352	1.293702e+001	4.371166e+000	81	45.5	9.704505e+000	0	0	0	0	0	0	12.0465	1	0	65	45.625
DATA	1997	24	42	0	0	A_44_P489608	NM_023967	7791	350.455	1.681858e+002	1.733216e+001	226	43	6.611944e+000	0	0	0	0	0	0	156.136	1	1	65	42.0303
DATA	1998	24	43	0	0	A_44_P213088	ENSRNOT00000037507	7816.42	350.427	4.496428e+001	6.153806e+000	109	47.5	7.446014e+000	0	0	0	0	0	0	41.6096	1	1	57.5363	48.9643
DATA	1999	24	44	0	0	A_64_P060725	NM_001025278	7841.58	350.427	1.013936e+001	4.335596e+000	74	51	8.721122e+000	0	0	0	0	0	0	9.35173	1	0	57.5363	48.1667
DATA	2000	24	45	0	0	A_44_P384698	XM_216321	7867	349.774	3.183360e+003	3.183641e+002	3074	45	8.949035e+000	0	0	0	0	0	0	2925.52	1	1	45.4864	43.9091
DATA	2001	24	46	0	0	A_42_P696084	NM_031022	7892.5	349.773	3.035201e+003	3.035498e+002	2917.5	40	8.850612e+000	0	0	0	0	0	0	2779.08	1	1	46.5243	40.5556
DATA	2002	24	47	0	0	A_64_P014918	NM_001108246	7917.77	349.703	2.798696e+003	2.799020e+002	2549.5	44	4.490611e+000	0	0	0	0	0	0	2552.78	1	1	45.1352	42.9677
DATA	2003	24	48	0	0	A_64_P032690	ENSRNOT00000049975	7943.42	350.427	8.268897e+004	8.268899e+003	74851	41	6.032751e+000	0	0	0	0	0	0	75128.3	1	1	57.5363	41.4138
DATA	2004	24	49	0	0	A_42_P481516	NM_134364	7968.3	350.1	1.133475e+004	1.133483e+003	10273.5	43.5	1.061464e+001	0	0	0	1	0	0	10256.6	1	1	47.2035	43.6786
DATA	2005	24	50	0	0	A_64_P166158	ENSRNOT00000013694	7994.11	350.5	1.873598e+002	1.922641e+001	237	40	1.003571e+001	0	0	0	0	0	0	168.821	1	1	56.9804	41.3462
DATA	2006	24	51	0	0	A_64_P140338	A_64_P140338	8019.5	350.5	4.352249e+000	4.350474e+000	72	42	5.835192e+000	0	0	0	0	0	0	3.42939	0	0	57.5363	40.871
DATA	2007	24	52	0	1	ERCC-00062_278	ERCC-00062_278	8044.94	349.968	3.191032e+002	3.220590e+001	360.5	40	5.007270e+000	0	0	0	0	0	0	284.987	1	1	45.835	39.4643
DATA	2008	24	53	0	0	A_64_P110838	NM_001013175	8070.06	349.825	4.032663e+002	4.056305e+001	427.5	38	7.340421e+000	0	0	0	0	0	0	358.524	1	1	45.4864	39.1034
DATA	2009	24	54	0	0	A_42_P802358	NM_001024341	8095.42	350.122	1.528066e+004	1.528073e+003	13332	43.5	6.731431e+000	0	0	0	0	0	0	13523	1	1	48.5334	41.8571
DATA	2010	24	55	0	0	A_64_P010421	A_64_P010421	8121.11	350.5	7.012418e+001	8.286028e+000	127.5	42.5	6.334586e+000	0	0	0	0	0	0	61.765	1	1	56.9804	40.8571
DATA	2011	24	56	0	0	A_43_P13320	NM_138880	8146.3	350.036	1.434737e+001	4.661748e+000	77.5	42	9.015814e+000	0	0	0	0	0	0	12.5762	1	0	42.5954	43.1481
DATA	2012	24	57	0	0	A_42_P800916	NM_022403	8171.67	350.5	8.042994e+001	9.195242e+000	143	45	1.064329e+001	0	0	0	0	0	0	70.1641	1	1	57.5363	45.2903
DATA	2013	24	58	0	0	A_42_P554610	XM_001064863	8197	350.5	1.485025e+004	1.485032e+003	12669	44	5.877385e+000	0	0	0	1	0	0	12891.5	1	1	48.5334	43.3929
DATA	2014	24	59	0	0	A_42_P476353	NM_001012113	8222.38	350.237	1.075762e+004	1.075772e+003	8966	40	7.344949e+000	0	0	0	0	0	0	9292.2	1	1	49.1849	41.6552
DATA	2015	24	60	0	0	A_43_P12234	NM_022516	8247.86	350.278	3.511643e+003	3.511934e+002	3046	39	6.263704e+000	0	0	0	0	0	0	3018.18	1	1	47.8731	38.3448
DATA	2016	24	61	0	0	A_64_P048315	ENSRNOT00000044039	8273.2	349.967	2.800841e+002	2.837501e+001	311.5	40	7.219235e+000	0	0	0	0	0	0	239.517	1	1	44.7812	41.1316
DATA	2017	24	62	0	0	A_44_P477047	NM_171983	8298.67	350.5	6.922836e+004	6.922837e+003	57098.5	43	1.059823e+001	0	0	0	0	0	0	58910.4	1	1	57.5363	44.75
DATA	2018	24	63	0	0	A_43_P11871	NM_017230	8324.42	350.573	7.788675e+001	9.041560e+000	136.5	42	1.034125e+001	0	0	0	0	0	0	65.9447	1	1	65	41.9459
DATA	2019	24	64	0	0	A_64_P060608	XM_001068783	8349.52	350.397	6.547784e+001	8.010566e+000	121.5	40	8.296833e+000	0	0	0	0	0	0	55.1652	1	1	44.4243	40.8621
DATA	2020	24	65	0	0	A_64_P115811	NM_001008516	8375	350.545	3.437025e+001	5.772306e+000	96	38.5	7.979704e+000	0	0	0	0	0	0	28.8148	1	1	55.8519	39
DATA	2021	24	66	0	0	A_44_P131296	ENSRNOT00000039892	8400.42	350.573	4.211032e+001	6.280935e+000	102	41	9.217328e+000	0	0	0	0	0	0	35.1319	1	1	57.5363	42.3226
DATA	2022	24	67	0	0	A_44_P668388	NM_001109245	8425.58	350.573	4.082106e+002	4.108874e+001	420	41	1.053961e+001	0	0	0	0	0	0	338.941	1	1	65	42.4
DATA	2023	24	68	0	0	A_64_P069729	NM_019189	8450.94	350.768	1.877169e+002	1.935223e+001	224	41	8.694252e+000	0	0	0	0	0	0	155.132	1	1	46.5243	38.5294
DATA	2024	24	69	1028	1	(+)E1A_r60_1	E1A_r60_1	8476.47	350.281	4.747282e+000	4.726992e+000	64	37	8.645750e+000	0	0	0	0	0	0	-4.0059	0	0	42.2201	37.6563
DATA	2025	24	70	0	0	A_64_P165441	NM_001109059	8502	350.545	3.540370e+001	5.922943e+000	94	38.5	6.488925e+000	0	0	0	0	0	0	28.9882	1	1	55.8519	38.8846
DATA	2026	24	71	0	0	A_44_P1034910	NM_201562	8527.41	350.382	2.869569e+003	2.869966e+002	2426	38	8.139804e+000	0	0	0	0	0	0	2339.15	1	1	46.8651	38.8889
DATA	2027	24	72	0	0	A_42_P631818	NM_030854	8552.74	350.271	5.253788e+003	5.254006e+002	4297	37.5	1.107152e+001	0	0	0	0	0	0	4264.35	1	1	46.8651	37.4615
DATA	2028	24	73	0	0	A_64_P095620	ENSRNOT00000031258	8578.37	350.596	5.039491e+001	6.966283e+000	109	41	9.466760e+000	0	0	0	0	0	0	40.7372	1	1	57.8122	42.6333
DATA	2029	24	74	0	0	A_42_P726573	NM_053838	8603.56	350.521	1.370527e+003	1.371377e+002	1154	47	8.256659e+000	0	0	0	0	0	0	1103.54	1	1	48.2044	44.6207
DATA	2030	24	75	0	0	A_64_P029142	NM_001107866	8628.91	350.614	1.420621e+002	1.501019e+001	182.5	48	1.323176e+001	0	0	0	0	0	0	113.962	1	1	57.259	50.2903
DATA	2031	24	76	0	0	A_43_P22902	NM_001106874	8654.5	351	4.884404e+000	4.863528e+000	62.5	48	1.168583e+001	0	0	0	0	0	0	-7.0962	0	0	54.1152	50.3939
DATA	2032	24	77	0	0	A_42_P619008	NM_001013079	8679.73	350.775	6.603733e+003	6.603913e+002	5232.5	47	9.612953e+000	0	0	0	0	0	0	5261.43	1	1	47.2035	46.1379
DATA	2033	24	78	0	0	A_64_P054421	A_64_P054421	8705.09	350.935	1.297426e+001	5.063669e+000	78	48	8.894843e+000	0	0	0	0	0	0	10.3057	1	0	54.4085	46.7586
DATA	2034	24	79	0	0	A_42_P627330	NM_001106628	8730.61	350.775	1.335210e+003	1.336112e+002	1124.5	46	8.299504e+000	0	0	0	0	0	0	1057.56	1	1	47.5395	46.8966
DATA	2035	24	80	0	0	A_64_P049613	A_64_P049613	8755.91	350.935	2.549035e+001	5.541850e+000	89.5	44	1.161626e+001	0	0	0	0	0	0	20.1398	1	1	54.4085	43
DATA	2036	24	81	0	0	A_42_P708614	NM_001130505	8781.5	351	4.885201e+004	4.885204e+003	38445	46	9.374528e+000	0	0	0	0	0	0	38511.9	1	1	48.5334	45.1034
DATA	2037	24	82	0	0	A_42_P660068	NM_031350	8806.75	351	2.810029e+003	2.810463e+002	2267	42.5	9.393942e+000	0	0	0	0	0	0	2211.07	1	1	49.1849	43.6154
DATA	2038	24	83	66	1	DarkCorner	DarkCorner	8831.49	350.792	4.970141e+000	4.948898e+000	59	44	8.458041e+000	0	0	0	0	0	0	-9.97599	0	0	47.8731	44.4615
DATA	2039	24	84	66	1	DarkCorner	DarkCorner	8856.99	351.338	4.975538e+000	4.954273e+000	60	40.5	9.910701e+000	0	0	0	0	0	0	-8.46806	0	0	48.2044	42.3182
DATA	2040	24	85	66	1	DarkCorner	DarkCorner	8883.02	350.424	4.980787e+000	4.959499e+000	62	36	7.835114e+000	0	0	0	0	0	0	-6.44705	0	0	43.7019	36.6613
DATA	2041	25	1	66	1	DarkCorner	DarkCorner	6737.42	356.573	4.366818e+000	4.348154e+000	60.5	38	8.761177e+000	0	0	0	0	0	0	-1.91941	0	0	57.5363	38.5925
DATA	2042	25	2	66	1	DarkCorner	DarkCorner	6762.5	356.648	4.348595e+000	4.330009e+000	58.5	43	6.850539e+000	0	0	0	0	0	0	-2.04612	0	0	57.5363	42.9667
DATA	2043	25	3	0	0	A_64_P106975	A_64_P106975	6788.11	356.929	3.672980e+002	3.698202e+001	396	45.5	8.554321e+000	0	0	0	0	0	0	331.191	1	1	46.8651	45.7188
DATA	2044	25	4	0	0	A_42_P799702	NM_145093	6813.42	356.573	7.329193e+002	7.341765e+001	728.5	42	8.345058e+000	0	0	0	1	0	0	663.498	1	1	57.5363	42.84
DATA	2045	25	5	0	0	A_42_P704429	NM_053428	6838.58	356.573	5.084299e+004	5.084301e+003	46287	44.5	9.065419e+000	0	0	0	0	0	0	46207.2	1	1	57.5363	45.0909
DATA	2046	25	6	0	0	A_64_P129730	NM_001033896	6864.37	356.596	9.016098e+001	9.972424e+000	146.5	41	1.037680e+001	0	0	0	0	0	0	82.2597	1	1	57.8122	42.7037
DATA	2047	25	7	0	0	A_64_P156308	NM_001008284	6889.05	356.392	7.907093e+002	7.918485e+001	773	37	1.192340e+001	0	0	0	0	0	0	723.997	1	1	49.1849	39.1034
DATA	2048	25	8	0	0	A_44_P152029	A_44_P152029	6914.91	356.935	1.767041e+001	4.584588e+000	81	42	1.065525e+001	0	0	0	0	0	0	16.24	1	0	65	42.3714
DATA	2049	25	9	0	0	A_42_P751152	NM_001106360	6940.5	357	4.291226e+004	4.291228e+003	39762	47	7.284413e+000	0	0	0	0	0	0	39575.9	1	1	54.1152	48.7037
DATA	2050	25	10	0	0	A_64_P010494	NM_001001421	6965.44	357.028	1.733530e+002	1.783731e+001	220	42	7.053368e+000	0	0	0	0	0	0	160.394	1	1	48.2044	43.25
DATA	2051	25	11	0	0	A_64_P054606	NM_001107279	6990.85	356.985	4.095610e+002	4.116976e+001	451	44	9.628615e+000	0	0	0	0	0	0	380.139	1	1	46.8651	43.0909
DATA	2052	25	12	0	0	A_44_P335679	NM_001108168	7016.24	357.162	7.255035e+001	8.371162e+000	132	45.5	1.163694e+001	0	0	0	0	0	0	67.5418	1	1	46.1809	44.4688
DATA	2053	25	13	0	0	A_64_P128766	NM_001034912	7041.46	356.901	3.657321e+002	3.680956e+001	404	47.5	1.369155e+001	0	0	0	0	0	0	341.431	1	1	47.8731	49.4615
DATA	2054	25	14	0	0	A_42_P595591	NM_031011	7067.01	356.889	2.227782e+004	2.227786e+003	20010	43	6.984383e+000	0	0	0	1	0	0	20853.3	1	1	46.8651	43.6667
DATA	2055	25	15	0	0	A_44_P962846	ENSRNOT00000058887	7092.5	357	4.610951e+002	4.629527e+001	506	44.5	9.868030e+000	0	0	0	0	0	0	432.696	1	1	48.5334	43.9063
DATA	2056	25	16	0	0	A_64_P111878	XR_005569	7118	357	2.093153e+003	2.093561e+002	2142	44	9.935491e+000	0	0	0	0	0	0	1968.79	1	1	46.8651	44.7742
DATA	2057	25	17	0	0	A_64_P149225	NM_001100833	7143.5	357	1.212437e+005	1.212437e+004	113921	48	1.150137e+001	0	0	0	0	0	0	114283	1	1	54.1152	51.1667
DATA	2058	25	18	0	0	A_64_P032361	ENSRNOT00000061428	7168.59	357.092	2.945223e+003	2.945511e+002	2820	53	1.353127e+001	0	0	0	0	0	0	2781.48	1	1	49.1849	52.8462
DATA	2059	25	19	0	0	A_64_P038843	A_64_P038843	7194.14	357.175	1.911400e+001	4.532306e+000	82	46	9.143304e+000	0	0	0	0	0	0	18.0832	1	0	42.5954	46.6667
DATA	2060	25	20	1028	1	(+)E1A_r60_a97	E1A_r60_a97	7219.5	357	4.120903e+000	4.103290e+000	60	43	8.893580e+000	0	0	0	0	0	0	-4.41073	0	0	65	42.5313
DATA	2061	25	21	0	0	A_42_P586883	NM_001106416	7245	357	9.378493e+001	1.023463e+001	155	45	1.026563e+001	0	0	0	0	0	0	88.9825	1	1	54.9904	45.3125
DATA	2062	25	22	0	0	A_42_P626023	NM_001107265	7270.17	357	7.293771e+002	7.305246e+001	758	47	8.825477e+000	0	0	0	0	0	0	692.814	1	1	46.8651	45.9474
DATA	2063	25	23	0	0	A_64_P304646	ENSRNOT00000046873	7295.58	357.427	1.542722e+002	1.595993e+001	210	42	8.877504e+000	0	0	0	0	0	0	146.684	1	1	57.5363	42.3143
DATA	2064	25	24	0	0	A_42_P540711	NM_133568	7320.92	356.762	1.671740e+004	1.671745e+003	15979.5	44	8.645576e+000	0	0	0	0	0	0	15905.6	1	1	45.4864	44.7353
DATA	2065	25	25	0	0	A_64_P079149	XM_001063529	7346.7	357.1	7.518841e+002	7.529924e+001	773.5	42	1.231619e+001	0	0	0	0	0	0	715.778	1	1	47.2035	43.9667
DATA	2066	25	26	0	0	A_42_P507072	FQ213070	7371.74	357.222	5.191630e+003	5.191791e+002	5041.5	42.5	9.431363e+000	0	0	0	0	0	0	4943.92	1	1	47.5395	42.7813
DATA	2067	25	27	0	0	A_44_P314270	ENSRNOT00000015469	7397.21	356.955	2.185458e+002	2.223261e+001	274.5	40.5	7.154382e+000	0	0	0	0	0	0	208.134	1	1	46.1809	41
DATA	2068	25	28	0	0	A_64_P026098	ENSRNOT00000027092	7422.61	357.275	1.266146e+002	1.330342e+001	184	43	9.601416e+000	0	0	0	0	0	0	120.574	1	1	46.8651	42.4828
DATA	2069	25	29	0	0	A_64_P018599	XM_229548	7448.42	357.427	4.101484e+000	4.083954e+000	56	37.5	1.110076e+001	0	0	0	0	0	0	-9.53348	0	0	57.5363	39.4474
DATA	2070	25	30	0	0	A_43_P15907	NM_001134567	7473.58	357.427	4.175899e+001	5.842465e+000	105.5	40	9.376109e+000	0	0	0	0	0	0	39.7335	1	1	57.5363	40.2432
DATA	2071	25	31	0	0	A_64_P151804	A_64_P151804	7498.85	356.955	9.883747e+001	1.069631e+001	159	37	8.851984e+000	0	0	0	0	0	0	93.9694	1	1	46.5243	38.4359
DATA	2072	25	32	0	0	A_42_P642743	NM_017005	7524.03	356.723	1.542778e+004	1.542784e+003	14868	40	9.220740e+000	0	0	0	0	0	0	14653.8	1	1	45.4864	40.2895
DATA	2073	25	33	0	0	A_42_P630463	NM_022238	7549.58	357.427	2.894469e+002	2.923331e+001	342.5	38	6.365225e+000	0	0	0	0	0	0	274.625	1	1	57.5363	37.3667
DATA	2074	25	34	0	0	A_64_P119533	NM_001000351	7575.33	357.5	2.403718e+001	4.755600e+000	90	42	9.487173e+000	0	0	0	0	0	0	22.7749	1	1	65	43.1613
DATA	2075	25	35	0	0	A_64_P158068	FQ219182	7600.12	357.603	2.802268e+003	2.802569e+002	2664	38	8.076837e+000	0	0	0	0	0	0	2651.07	1	1	48.5334	40
DATA	2076	25	36	0	0	A_64_P000779	XM_225838	7626.45	357.759	6.058653e+001	7.325175e+000	123	40	1.017135e+001	0	0	0	0	0	0	57.2132	1	1	52.0157	40.9722
DATA	2077	25	37	0	0	A_44_P630082	ENSRNOT00000020640	7651.07	356.803	2.221236e+002	2.259222e+001	276	42	1.048265e+001	0	0	0	0	0	0	209.333	1	1	44.7812	43.9459
DATA	2078	25	38	0	0	A_42_P717654	XM_001063683	7676.55	357.254	5.942455e+003	5.942599e+002	5358.5	44	9.095392e+000	0	0	0	0	0	0	5588.37	1	1	47.5395	42.6154
DATA	2079	25	39	0	0	A_42_P792382	NM_017257	7701.94	357.232	6.387550e+003	6.387685e+002	5930	40	7.630201e+000	0	0	0	0	0	0	5992.75	1	1	46.5243	40.1282
DATA	2080	25	40	0	0	A_64_P075035	NM_001001014	7727.5	357.5	2.021194e+002	2.063451e+001	254	41	9.033091e+000	0	0	0	0	0	0	189.146	1	1	57.5363	42.6053
DATA	2081	25	41	0	0	A_64_P021281	NM_001039022	7752.63	357.37	5.070063e+003	5.070234e+002	4946.5	41	1.058940e+001	0	0	0	0	0	0	4731.72	1	1	48.2044	43.1538
DATA	2082	25	42	0	0	A_44_P729533	TC581820	7778.06	357.611	9.531538e+003	9.531629e+002	8802	42	1.096064e+001	0	0	0	0	0	0	8869.78	1	1	48.2044	42.25
DATA	2083	25	43	0	0	A_42_P802358	NM_001024341	7803.44	357.521	1.533880e+004	1.533886e+003	14207	45	5.987808e+000	0	0	0	0	0	0	14229.7	1	1	48.2044	44.5769
DATA	2084	25	44	0	0	A_42_P481087	XM_232226	7828.88	357.616	1.979790e+003	1.980236e+002	1908	46	8.584124e+000	0	0	0	0	0	0	1830.66	1	1	48.5334	46.4828
DATA	2085	25	45	0	0	A_42_P561597	NM_001106486	7854.3	357.029	1.004118e+004	1.004126e+003	9305	46.5	1.034593e+001	0	0	0	0	0	0	9252.35	1	1	46.1809	43.8529
DATA	2086	25	46	0	0	A_64_P113381	A_64_P113381	7879.67	357.5	1.449714e+001	4.475582e+000	78.5	40	9.424573e+000	0	0	0	0	0	0	13.3113	1	0	57.5363	40.625
DATA	2087	25	47	0	0	A_64_P088695	NM_001134414	7904.93	357.507	3.290816e+003	3.291090e+002	2980.5	41	6.971805e+000	0	0	0	0	0	0	3010.41	1	1	48.5334	40
DATA	2088	25	48	0	0	A_44_P728586	ENSRNOT00000013367	7930.32	357.382	1.680815e+003	1.681357e+002	1653.5	42	6.571620e+000	0	0	0	0	0	0	1531.62	1	1	46.5243	40.6216
DATA	2089	25	49	0	0	A_42_P544898	NM_001108279	7956	357.545	1.682898e+002	1.736568e+001	213	42	1.142210e+001	0	0	0	0	0	0	152.733	1	1	55.8519	43.1333
DATA	2090	25	50	0	0	A_44_P432910	NM_012814	7981.42	357.573	1.499377e+005	1.499377e+004	133718	46.5	1.102328e+001	0	0	0	0	0	0	135514	1	1	57.5363	46.7333
DATA	2091	25	51	0	0	A_64_P157820	XM_001079095	8006.44	357.973	1.499596e+002	1.560572e+001	203	39	5.106532e+000	0	0	0	0	0	0	134.971	1	1	48.5334	39.08
DATA	2092	25	52	0	0	A_42_P601802	NM_134465	8031.79	357.605	3.266557e+003	3.266845e+002	2908.5	42	5.756201e+000	0	0	0	0	0	0	2927.09	1	1	49.1849	40.5769
DATA	2093	25	53	0	0	A_64_P039737	NM_001130508	8057.44	357.521	8.666393e+002	8.677346e+001	828	39.5	6.299152e+000	0	0	0	0	0	0	773.055	1	1	48.2044	39.9
DATA	2094	25	54	0	0	A_42_P648800	AA998304	8083	357.545	5.376274e+002	5.394076e+001	542	38	7.125891e+000	0	0	0	0	0	0	477.364	1	1	55.8519	38.7241
DATA	2095	25	55	0	0	A_64_P007009	ENSRNOT00000014567	8108.37	357.63	2.626986e+003	2.627354e+002	2428	45.5	8.640044e+000	0	0	0	0	0	0	2321.69	1	1	48.2044	42.2917
DATA	2096	25	56	0	0	A_64_P049527	TC606896	8133.6	357.729	7.052583e+002	7.066419e+001	683	42	6.606135e+000	0	0	0	0	0	0	620.372	1	1	47.2035	39.8889
DATA	2097	25	57	0	0	A_44_P281595	NM_001037556	8159.42	357.573	1.034245e+002	1.125588e+001	159	43	8.903908e+000	0	0	0	0	0	0	90.5299	1	1	57.5363	42.2903
DATA	2098	25	58	0	0	A_44_P374638	NM_024391	8184.94	357.91	1.153336e+002	1.236685e+001	171	44	7.555351e+000	0	0	0	0	0	0	100.466	1	1	46.8651	42.2
DATA	2100	25	60	0	0	A_64_P046416	A_64_P046416	8235.42	357.573	9.708433e+001	1.070377e+001	149	41	8.573110e+000	0	0	0	0	0	0	83.7404	1	1	57.5363	42.3235
DATA	2101	25	61	0	0	A_44_P428560	NM_001001358	8260.58	357.573	9.514922e+001	1.053811e+001	151	40.5	7.064644e+000	0	0	0	0	0	0	81.6682	1	1	57.5363	40.4333
DATA	2102	25	62	0	0	A_44_P208887	NM_001105774	8286.55	357.817	9.012364e+001	1.009699e+001	144.5	43	7.694782e+000	0	0	0	0	0	0	76.965	1	1	47.5395	42.875
DATA	2103	25	63	0	0	A_42_P533792	NM_001106575	8311	357.797	1.309286e+004	1.309294e+003	10769	42	1.038347e+001	0	0	0	1	0	0	11127.8	1	1	46.8651	42.8095
DATA	2104	25	64	0	0	A_42_P802550	NM_017365	8336.75	358.014	8.628930e+002	8.641168e+001	804	40	8.192872e+000	0	0	0	0	0	0	729.731	1	1	47.2035	41.1379
DATA	2105	25	65	0	0	A_42_P545129	ENSRNOT00000007554	8362	357.797	1.877187e+003	1.877756e+002	1618	40	8.236282e+000	0	0	0	0	0	0	1579.68	1	1	46.8651	40.6757
DATA	2106	25	66	0	0	A_42_P500675	NM_013179	8387.44	357.972	5.457902e+002	5.477612e+001	525	39.5	8.589520e+000	0	0	0	0	0	0	457.061	1	1	48.2044	39.9118
DATA	2107	25	67	0	0	A_44_P127238	NM_001127655	8412.93	357.8	1.048818e+003	1.049855e+002	964.5	41	1.088021e+001	0	0	0	0	0	0	874.038	1	1	46.8651	43.9259
DATA	2108	25	68	0	0	A_64_P042142	ENSRNOT00000027371	8438.5	358	1.342212e+002	1.421714e+001	182	40.5	6.530326e+000	0	0	0	0	0	0	111.323	1	1	54.1152	40.5
DATA	2109	25	69	0	0	A_44_P279756	NM_022848	8463.5	358	1.129288e+001	4.842727e+000	77.5	39	8.923921e+000	0	0	0	0	0	0	9.32337	1	0	54.1152	38
DATA	2110	25	70	0	0	A_64_P119597	NM_001106871	8489.36	358.045	1.557671e+001	4.980972e+000	79.5	38	5.307899e+000	0	0	0	0	0	0	12.8005	1	0	45.4864	38.4074
DATA	2111	25	71	0	0	A_44_P790674	NM_001191933	8514.57	357.9	4.880881e+001	6.812250e+000	108	36	6.791939e+000	0	0	0	0	0	0	39.9316	1	1	47.5395	36.6957
DATA	2112	25	72	0	0	A_44_P405618	ENSRNOT00000025426	8539.93	357.8	5.546254e+002	5.566753e+001	523.5	39	8.039831e+000	0	0	0	0	0	0	451.789	1	1	46.8651	37.75
DATA	2113	25	73	0	0	A_42_P719478	NM_001191779	8565.39	357.763	3.653876e+001	6.026854e+000	97	37.5	9.814662e+000	0	0	0	0	0	0	29.6394	1	1	42.9674	37.5
DATA	2114	25	74	0	0	A_64_P061424	A_64_P061424	8590.82	358.031	5.606440e+001	7.388300e+000	114	39	8.897884e+000	0	0	0	0	0	0	45.2984	1	1	45.835	40.8788
DATA	2115	25	75	0	0	A_44_P1042876	NM_212504	8616.2	358	2.481117e+003	2.481587e+002	1997	46	1.032504e+001	0	0	0	0	0	0	1997.01	1	1	49.1849	45.1613
DATA	2116	25	76	0	0	A_44_P470043	NM_001108103	8641.5	358.352	5.559315e+002	5.580409e+001	521	46	1.514306e+001	0	0	0	0	0	0	445.879	1	1	65	48.8571
DATA	2117	25	77	0	0	A_64_P108484	ENSRNOT00000046584	8667.09	358.386	5.656518e+001	7.460321e+000	110.5	46	8.298733e+000	0	0	0	0	0	0	45.2123	1	1	57.259	46.6
DATA	2118	25	78	0	0	A_42_P666065	NM_001014069	8692.27	358.068	1.147360e+003	1.148397e+002	981	44	9.614507e+000	0	0	0	0	0	0	914.138	1	1	48.2044	43.1481
DATA	2119	25	79	0	0	A_64_P136571	NM_001134545	8717.74	357.908	1.098546e+002	1.202641e+001	154.5	46	8.922978e+000	0	0	0	0	0	0	87.2658	1	1	45.835	45.9667
DATA	2120	25	80	0	0	A_42_P816740	NM_001108705	8743.23	358.116	4.459418e+002	4.486335e+001	423	45	1.085610e+001	0	0	0	1	0	0	353.321	1	1	46.5243	46.125
DATA	2121	25	81	0	0	A_64_P018142	NM_001100716	8768.77	358.257	2.970061e+002	3.010513e+001	306	41	1.022331e+001	0	0	0	0	0	0	234.77	1	1	48.8603	41.9667
DATA	2122	25	82	0	0	A_42_P779687	ENSRNOT00000034449	8793.92	358.392	1.748920e+004	1.748927e+003	13186.5	44	9.093599e+000	0	0	0	0	0	0	13796.9	1	1	48.8603	44.875
DATA	2124	25	84	66	1	DarkCorner	DarkCorner	8844.58	358.427	4.964689e+000	4.943469e+000	55	41	9.676432e+000	0	0	0	0	0	0	-12.0511	0	0	65	41.7667
DATA	2125	25	85	66	1	DarkCorner	DarkCorner	8870.42	358.427	4.969670e+000	4.948430e+000	58	39	7.944778e+000	0	0	0	0	0	0	-10.4269	0	0	57.5363	39.4444
DATA	2126	26	1	66	1	DarkCorner	DarkCorner	6750.13	364.278	4.351592e+000	4.332993e+000	59	42	6.866269e+000	0	0	0	0	0	0	-3.17981	0	0	48.8603	41.4865
DATA	2127	26	2	66	1	DarkCorner	DarkCorner	6775.42	364.427	4.333581e+000	4.315059e+000	61	43	9.622949e+000	0	0	0	0	0	0	-2.70843	0	0	57.5363	43.7037
DATA	2128	26	3	0	0	A_42_P713844	NM_001106167	6800.48	364.147	9.724054e+002	9.733548e+001	914	45	8.963999e+000	0	0	0	0	0	0	879.616	1	1	49.8279	43.2593
DATA	2129	26	4	0	0	A_42_P627219	NM_001012468	6825.51	363.929	1.433846e+004	1.433853e+003	12642.5	42	8.441520e+000	0	0	0	0	0	0	13020.5	1	1	47.8731	41.4815
DATA	2130	26	5	0	0	A_42_P461003	NM_001044283	6850.97	363.723	1.728404e+004	1.728409e+003	16016	43.5	1.042966e+001	0	0	0	0	0	0	15755.5	1	1	45.4864	44.5
DATA	2131	26	6	0	0	A_44_P1019923	NM_022522	6876.37	363.735	3.389697e+003	3.389963e+002	3130	43	9.621530e+000	0	0	0	0	0	0	3101.52	1	1	46.5243	42.5769
DATA	2132	26	7	0	0	A_42_P814056	NM_001108866	6901.9	363.868	8.981145e+003	8.981245e+002	8277	38	1.057766e+001	0	0	0	1	0	0	8247.7	1	1	46.8651	39.7105
DATA	2133	26	8	0	0	A_42_P795269	NM_001134730	6927.23	364.116	1.054753e+004	1.054761e+003	9946.5	46	7.450626e+000	0	0	0	0	0	0	9720.25	1	1	46.5243	45.3871
DATA	2134	26	9	0	0	A_42_P763522	NM_001013980	6952.62	364.224	4.386634e+003	4.386835e+002	4124	46	8.619345e+000	0	0	0	0	0	0	4056.18	1	1	49.5074	46.6897
DATA	2135	26	10	0	0	A_44_P292437	NM_153309	6978.1	364.159	4.843423e+002	4.861523e+001	512	43	9.484795e+000	0	0	0	0	0	0	449.293	1	1	46.8651	42.4571
DATA	2136	26	11	0	0	A_64_P065313	ENSRNOT00000042070	7003.58	364.427	1.349481e+002	1.412685e+001	189	43	9.579674e+000	0	0	0	0	0	0	125.571	1	1	57.5363	42.8125
DATA	2137	26	12	0	0	A_64_P008047	NM_001033670	7028.75	364.553	3.462738e+004	3.462741e+003	32273	43	1.210962e+001	0	0	0	0	0	0	32314.1	1	1	49.5074	46
DATA	2138	26	13	0	0	A_64_P080612	TC638889	7054.06	363.825	5.689543e+003	5.689694e+002	5428	43	7.249808e+000	0	0	0	0	0	0	5323.4	1	1	45.4864	42.5294
DATA	2139	26	14	0	0	A_43_P17696	NM_001004257	7079.67	364.167	3.243799e+003	3.244063e+002	3048	45.5	1.008352e+001	0	0	0	0	0	0	3043.01	1	1	47.8731	45
DATA	2140	26	15	0	0	A_64_P019608	NM_001105713	7104.91	364.28	9.697364e+002	9.706174e+001	960.5	41.5	1.178173e+001	0	0	0	0	0	0	911.879	1	1	48.8603	43.5333
DATA	2141	26	16	0	0	A_64_P108575	ENSRNOT00000046600	7130.58	364.427	1.117154e+002	1.190890e+001	168	45	9.942415e+000	0	0	0	0	0	0	105.286	1	1	57.5363	47.5806
DATA	2142	26	17	0	0	A_64_P136859	NM_001109642	7155.86	364.438	9.798257e+003	9.798343e+002	9211	47	1.430620e+001	0	0	0	0	0	0	9252.87	1	1	48.5334	49.8966
DATA	2143	26	18	0	0	A_64_P021597	A_64_P021597	7181.09	365.059	4.126958e+000	4.124419e+000	69	47	1.057101e+001	0	0	0	0	0	0	3.33607	0	0	46.8651	47.6061
DATA	2144	26	19	0	0	A_64_P148032	A_64_P148032	7206.89	364.648	1.793560e+002	1.839885e+001	235	42	7.565033e+000	0	0	0	0	0	0	169.966	1	1	47.8731	42.2162
DATA	2145	26	20	0	0	A_42_P743580	NM_017214	7232.19	364.494	9.221499e+003	9.221590e+002	8829	44.5	8.115532e+000	0	0	0	0	0	0	8751.04	1	1	50.4627	44.3235
DATA	2146	26	21	0	0	A_42_P693964	NM_181087	7257.48	364.147	6.631380e+003	6.631507e+002	6196	47	1.043072e+001	0	0	0	0	0	0	6300.57	1	1	49.8279	47
DATA	2147	26	22	0	0	A_44_P1058389	NM_012992	7282.79	364.301	2.438101e+004	2.438104e+003	22779	45.5	8.274730e+000	0	0	0	0	0	0	23189	1	1	48.2044	44.875
DATA	2148	26	23	0	0	A_44_P135224	NM_022187	7308.47	364.529	1.294968e+002	1.357849e+001	192.5	42	1.090768e+001	0	0	0	0	0	0	123.272	1	1	47.2035	44.4595
DATA	2149	26	24	0	0	A_64_P070249	ENSRNOT00000048236	7333.5	364.426	1.033600e+003	1.034406e+002	1061	44	1.062873e+001	0	0	0	0	0	0	984.509	1	1	46.5243	45.6452
DATA	2150	26	25	0	0	A_42_P806899	NM_001108829	7359.42	364.573	5.841227e+001	7.125043e+000	119	38.5	9.447435e+000	0	0	0	0	0	0	55.6624	1	1	57.5363	39.8125
DATA	2151	26	26	0	0	A_42_P465144	NM_001107714	7384.58	364.573	1.125078e+002	1.196744e+001	170.5	39.5	7.841266e+000	0	0	0	0	0	0	107.233	1	1	57.5363	40.8214
DATA	2152	26	27	0	0	A_43_P19712	NM_001106751	7410.11	364.5	2.405048e+001	4.735428e+000	88	40	6.575170e+000	0	0	0	0	0	0	22.9226	1	1	56.9804	39.1563
DATA	2153	26	28	0	0	A_42_P728472	NM_001007600	7435.2	364.72	2.080804e+004	2.080808e+003	20030	38.5	1.118631e+001	0	0	0	0	0	0	19828.4	1	1	49.1849	39.8095
DATA	2154	26	29	66	-1	(-)3xSLv1	NegativeControl	7461.04	364.455	4.099397e+000	4.081876e+000	57	40	9.962899e+000	0	0	0	0	0	0	-9.70879	0	0	49.5074	41.2059
DATA	2155	26	30	0	0	A_42_P629394	NM_031683	7486	364.423	3.284316e+003	3.284570e+002	3117	40	8.417340e+000	0	0	0	0	0	0	3126.29	1	1	47.8731	39.4194
DATA	2156	26	31	0	0	A_64_P041977	A_64_P041977	7511.58	364.573	8.804395e+001	9.707108e+000	147	39.5	9.429209e+000	0	0	0	0	0	0	83.7376	1	1	57.5363	39.6176
DATA	2157	26	32	0	0	A_44_P126406	XM_228958	7536.94	364.382	9.735744e+003	9.735830e+002	9666.5	39	8.655284e+000	0	0	0	0	0	0	9249.63	1	1	46.1809	40.2895
DATA	2158	26	33	0	0	A_64_P021878	NM_001167664	7562.3	364.507	7.384151e+001	8.444756e+000	133	38.5	8.481895e+000	0	0	0	0	0	0	70.0672	1	1	46.8651	39.8438
DATA	2159	26	34	0	0	A_64_P058719	NM_001014175	7587.45	364.955	8.465287e+003	8.465386e+002	8199	39	8.193525e+000	0	0	0	0	0	0	8021.34	1	1	45.4864	41.4231
DATA	2160	26	35	0	0	A_42_P495579	NM_001107564	7613.42	364.573	4.138916e+002	4.159275e+001	456	37.5	9.771043e+000	0	0	0	0	0	0	391.501	1	1	57.5363	39.4524
DATA	2161	26	36	0	0	A_64_P054979	NM_001109615	7638	365.106	1.015034e+002	1.095367e+001	167	40	1.033126e+001	0	0	0	0	0	0	95.8445	1	1	46.8651	42.1212
DATA	2162	26	37	0	0	A_44_P713838	ENSRNOT00000032874	7664	364.545	2.149786e+002	2.189030e+001	272	42	1.053401e+001	0	0	0	0	0	0	202.552	1	1	55.8519	42.0811
DATA	2163	26	38	0	0	A_64_P158913	NM_001108101	7689.51	364.848	1.670975e+001	4.460494e+000	81	40.5	7.624174e+000	0	0	0	0	0	0	15.7087	1	0	45.835	40.5313
DATA	2164	26	39	0	0	A_43_P13018	NM_054004	7714.63	364.64	1.929105e+004	1.929109e+003	17999.5	40	7.269144e+000	0	0	0	0	0	0	18091	1	1	48.8603	38.9259
DATA	2165	26	40	0	0	A_64_P114383	A_64_P114383	7739.94	364.768	1.979623e+004	1.979628e+003	18721.5	43.5	8.834428e+000	0	0	0	0	0	0	18516.3	1	1	46.5243	43.4333
DATA	2166	26	41	0	0	A_43_P16629	XM_001080634	7765.24	365	8.437740e+003	8.437843e+002	7757	44	9.928480e+000	0	0	0	0	0	0	7870.28	1	1	46.8651	44.3333
DATA	2167	26	42	0	0	A_42_P810313	NM_001108677	7790.91	364.935	1.313315e+002	1.378258e+001	190	42.5	7.670639e+000	0	0	0	0	0	0	122.128	1	1	54.4085	42
DATA	2168	26	43	0	0	A_42_P537516	NM_001106023	7816.17	365	1.654668e+004	1.654674e+003	15514	46	1.146480e+001	0	0	0	0	0	0	15338.8	1	1	46.8651	50.1923
DATA	2169	26	44	0	0	A_64_P006964	A_64_P006964	7841.45	364.883	1.782158e+002	1.831165e+001	239	46	1.039080e+001	0	0	0	0	0	0	164.657	1	1	43.3362	46.2593
DATA	2170	26	45	0	0	A_42_P829251	NM_133381	7867.39	364.931	1.772397e+001	4.579947e+000	83	43	1.071116e+001	0	0	0	0	0	0	16.3173	1	0	53.8203	42.9737
DATA	2171	26	46	0	0	A_42_P687443	NM_020100	7892.43	364.769	2.427414e+002	2.464139e+001	284	41	7.118331e+000	0	0	0	0	0	0	222.668	1	1	45.4864	39.8214
DATA	2172	26	47	0	0	A_44_P196146	NM_031349	7918	365	1.984202e+002	2.029302e+001	249	40	6.175122e+000	0	0	0	0	0	0	181.323	1	1	54.9904	39.9189
DATA	2173	26	48	0	0	A_64_P050137	ENSRNOT00000058586	7943.5	365	2.621994e+002	2.656558e+001	312	39	7.077157e+000	0	0	0	0	0	0	238.661	1	1	54.1152	38.6154
DATA	2174	26	49	0	0	A_44_P637827	NM_001108797	7968.24	365	7.624602e+003	7.624722e+002	6817	42	9.890479e+000	0	0	0	0	0	0	6912.64	1	1	46.8651	43.2813
DATA	2175	26	50	0	0	A_64_P070073	NM_001109590	7994.09	365.065	1.514254e+002	1.574306e+001	205	38	1.128528e+001	0	0	0	0	0	0	136.702	1	1	54.4085	41.7667
DATA	2176	26	51	0	0	A_64_P130572	NM_001109400	8019.59	365.073	1.463660e+003	1.464299e+002	1418	42	5.409164e+000	0	0	0	0	0	0	1315.64	1	1	49.8279	41.0417
DATA	2177	26	52	0	0	A_42_P658815	NM_198745	8044.44	365.106	3.552383e+003	3.552648e+002	3301	39.5	6.191930e+000	0	0	0	0	0	0	3179.35	1	1	45.4864	39.5
DATA	2179	26	54	0	0	A_43_P14809	TC581403	8095.44	364.853	1.931182e+003	1.931679e+002	1766	42	6.812978e+000	0	0	0	0	0	0	1712.56	1	1	46.8651	41.4
DATA	2180	26	55	0	0	A_42_P553319	TC597248	8120.44	364.806	1.131874e+002	1.214554e+001	165.5	40	6.508615e+000	0	0	0	1	0	0	99.9107	1	1	44.0646	39.8276
DATA	2181	26	56	0	0	A_64_P004162	NM_019139	8146.29	364.778	9.143598e+000	4.519448e+000	75	41	7.524174e+000	0	0	0	0	0	0	8.032	1	0	45.1352	39.5882
DATA	2182	26	57	0	0	A_64_P032450	NM_172330	8171.86	364.828	2.642489e+002	2.679655e+001	305.5	44	1.070631e+001	0	0	0	0	0	0	231.001	1	1	45.4864	45
DATA	2183	26	58	0	0	A_44_P470976	NM_001013133	8197.12	365.068	8.529037e+001	9.628919e+000	140	43	6.314346e+000	0	0	0	0	0	0	74.2011	1	1	46.8651	43.75
DATA	2184	26	59	0	0	A_64_P166428	NM_001037205	8222.65	365.284	2.577225e+002	2.616060e+001	302	40.5	6.263051e+000	0	0	0	0	0	0	223.117	1	1	48.5334	41.5
DATA	2185	26	60	0	0	A_43_P11576	NM_012821	8248	365.455	2.222271e+001	5.030471e+000	87	41	9.365094e+000	0	0	0	0	0	0	19.1447	1	0	65	41.8529
DATA	2186	26	61	0	0	A_64_P156910	A_64_P156910	8273.42	365.427	2.867339e+002	2.902987e+001	315	41	7.105803e+000	0	0	0	0	0	0	245.797	1	1	57.5363	42.0857
DATA	2187	26	62	0	0	A_64_P126140	NM_001191648	8298.58	365.427	9.347133e+001	1.039914e+001	146	41	9.927659e+000	0	0	0	0	0	0	79.7339	1	1	57.5363	42.4074
DATA	2188	26	63	0	0	A_42_P637122	NM_001108351	8323.77	365.101	5.404148e+003	5.404343e+002	4516.5	41	1.059263e+001	0	0	0	0	0	0	4587.11	1	1	46.5243	41.8205
DATA	2189	26	64	0	0	A_64_P081208	NM_001009712	8349.14	364.915	1.882943e+004	1.882949e+003	15903	40	8.088408e+000	0	0	0	0	0	0	15903.7	1	1	44.0646	41.8788
DATA	2190	26	65	0	0	A_42_P465608	NM_130894	8374.75	365.06	4.123460e+003	4.123720e+002	3609.5	36	9.362441e+000	0	0	0	0	0	0	3465.72	1	1	45.835	39.697
DATA	2191	26	66	0	0	A_42_P485589	NM_017246	8400.42	365.427	3.466184e+002	3.497211e+001	363	40	9.009318e+000	0	0	0	0	0	0	289.927	1	1	57.5363	40.7333
DATA	2192	26	67	0	0	A_64_P031383	NM_020308	8425.57	365.392	6.851187e+002	6.867086e+001	637	40	9.574608e+000	0	0	0	0	0	0	570.358	1	1	49.1849	40.8387
DATA	2193	26	68	0	0	A_44_P220647	NM_001107097	8451.33	365.5	1.855383e+002	1.913800e+001	226.5	41	9.758401e+000	0	0	0	0	0	0	153.729	1	1	57.5363	39.5294
DATA	2194	26	69	0	0	A_44_P294687	NM_080885	8476.59	364.97	6.846362e+002	6.862574e+001	639	37.5	8.033264e+000	0	0	0	1	0	0	564.617	1	1	45.4864	37.1333
DATA	2195	26	70	0	0	A_42_P512838	NM_001106884	8501.86	364.844	1.159254e+003	1.160221e+002	997.5	38	8.026703e+000	0	0	0	0	0	0	951.748	1	1	45.4864	38.8065
DATA	2196	26	71	0	0	A_42_P635228	NM_001107651	8527.28	364.967	1.027173e+002	1.131945e+001	149	35	7.099724e+000	0	0	0	0	0	0	83.965	1	1	44.7812	35.5357
DATA	2197	26	72	0	0	A_44_P254687	NM_001105728	8552.64	364.938	2.437672e+002	2.484025e+001	262	38	8.213150e+000	0	0	0	0	0	0	198.424	1	1	45.1352	36.0741
DATA	2198	26	73	0	0	A_64_P049628	NM_001169145	8578	365.343	7.096074e+003	7.096236e+002	5813	39	7.922762e+000	0	0	0	0	0	0	5753.17	1	1	45.4864	38.5625
DATA	2199	26	74	0	0	A_64_P007703	NM_031674	8603.69	365.565	9.165868e+001	1.035322e+001	144	40	8.549791e+000	0	0	0	0	0	0	74.0237	1	1	43.7019	39.9677
DATA	2200	26	75	0	0	A_42_P645376	NM_001014135	8628.74	365.222	3.802582e+004	3.802585e+003	30311	45	1.461992e+001	0	0	0	0	0	0	30595.7	1	1	47.5395	46.75
DATA	2201	26	76	0	0	A_64_P040920	XM_577408	8654.19	365.412	3.903692e+003	3.903994e+002	3223.5	44.5	6.991027e+000	0	0	0	0	0	0	3130.05	1	1	46.5243	44.2727
DATA	2202	26	77	0	0	A_42_P819656	NM_130409	8679.69	365.338	5.424662e+003	5.424880e+002	4345	43	9.368697e+000	0	0	0	1	0	0	4335.27	1	1	48.5334	43.0714
DATA	2203	26	78	0	0	A_64_P018921	NM_001135012	8705.07	365.362	5.328993e+002	5.351287e+001	485.5	46	9.279646e+000	0	0	0	0	0	0	424.599	1	1	46.5243	44.6129
DATA	2204	26	79	0	0	A_43_P15253	NM_012967	8730.5	365.5	4.666165e+002	4.691748e+001	441.5	46	1.073967e+001	0	0	0	0	0	0	370.771	1	1	49.1849	46.4118
DATA	2205	26	80	0	0	A_64_P093063	NM_001136272	8755.79	365.712	3.459156e+002	3.493756e+001	347	46	1.084803e+001	0	0	0	0	0	0	274.198	1	1	45.4864	46.4138
DATA	2206	26	81	0	0	A_44_P477406	NM_012751	8781.62	365.789	4.914723e+002	4.939244e+001	467	44	8.667268e+000	0	0	0	0	0	0	388.723	1	1	47.5395	43.1923
DATA	2207	26	82	0	0	A_64_P056816	NM_001100697	8806.58	365.573	2.469728e+002	2.518352e+001	253.5	43	8.264056e+000	0	0	0	0	0	0	194.974	1	1	65	43.1935
DATA	2208	26	83	0	0	A_42_P580733	NM_001006981	8832	365.722	7.562912e+003	7.563073e+002	6124	42	6.438837e+000	0	0	0	0	0	0	5961.75	1	1	47.8731	41.7
DATA	2209	26	84	66	1	DarkCorner	DarkCorner	8857.07	365.972	4.958633e+000	4.937440e+000	59	41	8.720400e+000	0	0	0	0	0	0	-9.43405	0	0	46.8651	40.8857
DATA	2210	26	85	66	1	DarkCorner	DarkCorner	8882.78	365.507	4.963051e+000	4.941838e+000	62	35	8.154965e+000	0	0	0	0	0	0	-6.56071	0	0	46.5243	36.3539
DATA	2211	27	1	66	1	DarkCorner	DarkCorner	6737.33	371.5	4.355148e+000	4.336837e+000	63	38	8.649183e+000	0	0	0	0	0	0	0.459746	0	0	57.5363	38.0299
DATA	2212	27	2	66	1	DarkCorner	DarkCorner	6762.5	371.5	4.337313e+000	4.318775e+000	59	42	7.292716e+000	0	0	0	0	0	0	-4.70806	0	0	57.5363	41.9394
DATA	2213	27	3	0	0	A_44_P289922	NM_139103	6787.5	371.5	9.636833e+002	9.646429e+001	919	43	8.774964e+000	0	0	0	0	0	0	871.017	1	1	49.1849	44
DATA	2214	27	4	0	0	A_64_P117149	ENSRNOT00000065538	6813.42	371.427	3.466690e+001	5.511108e+000	95.5	45	7.437920e+000	0	0	0	0	0	0	31.4602	1	1	57.5363	43.5862
DATA	2215	27	5	0	0	A_42_P524308	NM_019213	6838.5	370.794	2.133830e+003	2.134257e+002	1952	42	1.011974e+001	0	0	0	0	0	0	1943.67	1	1	46.5243	42.9333
DATA	2216	27	6	0	0	A_64_P037562	XM_001070892	6863.75	371.431	8.927729e+002	8.937848e+001	888	43	7.313022e+000	0	0	0	0	0	0	816.345	1	1	45.4864	44.1379
DATA	2217	27	7	0	0	A_44_P267706	XR_085883	6889.23	371.141	6.164773e+001	7.480170e+000	122	41	9.504324e+000	0	0	0	0	0	0	56.5743	1	1	45.835	38.9048
DATA	2218	27	8	0	0	A_64_P082569	XM_001053354	6914.89	371.5	4.753915e+000	4.247983e+000	66.5	40	9.691875e+000	0	0	0	0	0	0	4.37847	1	0	56.9804	40.8919
DATA	2219	27	9	0	0	A_64_P000539	NM_053930	6940	371.271	1.327583e+004	1.327589e+003	12412	46	9.213799e+000	0	0	0	0	0	0	12268	1	1	46.8651	44.5862
DATA	2220	27	10	0	0	A_43_P22124	NM_213625	6965.31	371.662	3.301554e+003	3.301820e+002	3102.5	40	7.476861e+000	0	0	0	0	0	0	3060.97	1	1	48.5334	40.4
DATA	2221	27	11	0	0	A_44_P1012556	NM_001013988	6991	371.797	2.575532e+002	2.609236e+001	298.5	43	9.380359e+000	0	0	0	0	0	0	239.539	1	1	46.8651	41.907
DATA	2222	27	12	0	0	A_64_P115457	NM_001106361	7016.5	371.5	1.265187e+002	1.332078e+001	177	41	1.119216e+001	0	0	0	0	0	0	118.014	1	1	57.5363	44.7419
DATA	2223	27	13	0	0	A_64_P064229	A_64_P064229	7041.67	371.5	2.885352e+001	5.059921e+000	92	41.5	1.030536e+001	0	0	0	0	0	0	26.9882	1	1	65	42.2647
DATA	2224	27	14	0	0	A_64_P039066	ENSRNOT00000041345	7067.42	371.573	6.773497e+001	7.941409e+000	128	43	7.030567e+000	0	0	0	0	0	0	63.5252	1	1	57.5363	42.7632
DATA	2225	27	15	0	0	A_42_P574960	ENSRNOT00000068719	7092.38	371.37	9.801945e+002	9.810665e+001	1001	45.5	1.216188e+001	0	0	0	0	0	0	921.465	1	1	50.7771	45.7917
DATA	2226	27	16	0	0	A_42_P600215	NM_175844	7117.56	371.706	5.719759e+001	7.052759e+000	117	43	1.219308e+001	0	0	0	0	0	0	53.8941	1	1	46.8651	45.8667
DATA	2227	27	17	0	0	A_42_P607770	NM_001134616	7143.05	371.608	9.091761e+003	9.091854e+002	8423.5	46	1.303477e+001	0	0	0	0	0	0	8584.56	1	1	49.1849	48.0303
DATA	2228	27	18	0	0	A_64_P003348	NM_001077660	7168.5	371.692	7.222825e+002	7.234507e+001	744	49	1.266036e+001	0	0	0	0	0	0	683.299	1	1	50.4627	48.7308
DATA	2229	27	19	0	0	A_64_P057828	A_64_P057828	7194	372.078	1.000921e+003	1.001762e+002	1013	45	7.176575e+000	0	0	0	0	0	0	948.573	1	1	46.1809	45.6452
DATA	2230	27	20	0	0	A_64_P081765	NM_134355	7219.58	371.573	4.016898e+001	5.737267e+000	104	45	8.153879e+000	0	0	0	0	0	0	38.1243	1	1	57.5363	43.6176
DATA	2231	27	21	0	0	A_42_P758886	NM_019258	7245	371.545	6.452430e+002	6.465386e+001	679	46	9.250274e+000	0	0	0	0	0	0	613.208	1	1	55.8519	46.3514
DATA	2232	27	22	0	0	A_42_P745470	XM_001066818	7270.06	371.611	9.589655e+003	9.589742e+002	9141	44	8.281314e+000	0	0	0	0	0	0	9123.74	1	1	48.2044	44.1389
DATA	2233	27	23	0	0	A_42_P800949	NM_031787	7295.58	371.573	3.525492e+002	3.549053e+001	396	45	7.402866e+000	0	0	0	1	0	0	335.73	1	1	57.5363	44.6875
DATA	2234	27	24	0	0	A_42_P738559	NM_012801	7320.9	371.897	1.945494e+004	1.945498e+003	18799	42	1.142583e+001	0	0	0	0	0	0	18540.8	1	1	46.8651	43.2571
DATA	2235	27	25	0	0	A_42_P749550	NM_001109359	7346.44	371.972	3.944250e+003	3.944461e+002	3835	39	1.047463e+001	0	0	0	0	0	0	3760.88	1	1	48.2044	41.303
DATA	2236	27	26	0	0	A_64_P007493	ENSRNOT00000006658	7371.84	372.129	6.225711e+001	7.441414e+000	126	40	9.574571e+000	0	0	0	0	0	0	59.3818	1	1	45.1352	42.3793
DATA	2237	27	27	0	0	A_64_P056182	NM_053363	7396.94	372.087	3.222706e+003	3.222963e+002	3082	42	7.498320e+000	0	0	0	0	0	0	3074.15	1	1	46.8651	43.0313
DATA	2238	27	28	0	0	A_42_P818546	NM_001191600	7422.5	372	1.600614e+003	1.601133e+002	1602	40	8.365315e+000	0	0	0	0	0	0	1526.64	1	1	48.5334	39.6129
DATA	2239	27	29	0	0	A_44_P407948	XM_001055260	7448.39	371.931	5.684966e+001	6.996156e+000	118	42	1.064102e+001	0	0	0	0	0	0	54.2042	1	1	53.8203	41.8649
DATA	2240	27	30	66	-1	(-)3xSLv1	NegativeControl	7473.97	372.317	4.097211e+000	4.079700e+000	55	42.5	8.198581e+000	0	0	0	0	0	0	-10.8201	0	0	43.7019	42.5938
DATA	2241	27	31	0	0	A_64_P044505	NM_031587	7498.84	371.897	6.140783e+002	6.154341e+001	644	39	7.058892e+000	0	0	0	0	0	0	584.759	1	1	46.5243	39.8065
DATA	2242	27	32	0	0	A_42_P685138	NM_153621	7523.91	371.896	1.112467e+003	1.113218e+002	1106	39	9.462443e+000	0	0	0	1	0	0	1058.36	1	1	46.8651	38.725
DATA	2243	27	33	0	0	A_64_P121747	ENSRNOT00000050332	7549.57	371.745	1.272054e+001	4.284682e+000	79.5	40.5	8.253787e+000	0	0	0	0	0	0	12.0876	1	0	40.2912	41.9375
DATA	2244	27	34	0	0	A_42_P791436	NM_012750	7575	372	1.337716e+003	1.338343e+002	1370	38	7.571791e+000	0	0	0	0	0	0	1269.46	1	1	54.9904	39.8261
DATA	2245	27	35	0	0	A_44_P349309	NM_001100890	7600.17	372	9.248107e+002	9.257205e+001	918	40	8.485083e+000	0	0	0	0	0	0	876.263	1	1	46.8651	40.6571
DATA	2246	27	36	0	0	A_42_P502621	NM_024401	7625.77	372.043	8.392828e+001	9.345402e+000	147	37	9.193701e+000	0	0	0	0	0	0	79.3817	1	1	46.8651	38.4
DATA	2247	27	37	0	0	A_43_P21574	NM_001012043	7651.06	371.969	1.853832e+002	1.899033e+001	246	44	1.129727e+001	0	0	0	0	0	0	174.997	1	1	45.835	43.0889
DATA	2248	27	38	0	0	A_44_P496331	NM_001001085	7676.4	371.86	5.494829e+001	6.872414e+000	115	38	7.334378e+000	0	0	0	0	0	0	51.7577	1	1	39.8942	40.3103
DATA	2249	27	39	0	0	A_64_P016503	ENSRNOT00000003659	7702.09	372.065	1.468400e+002	1.525573e+001	203	40	7.998041e+000	0	0	0	0	0	0	137.989	1	1	54.4085	40.2593
DATA	2250	27	40	0	0	A_43_P13270	NM_134415	7727.17	372	2.020055e+004	2.020059e+003	18783	41	8.732450e+000	0	0	0	0	0	0	18935.3	1	1	46.8651	43.5455
DATA	2251	27	41	0	0	A_42_P553960	NM_001107831	7752.56	372.187	9.551914e+003	9.552005e+002	8941	45	8.911977e+000	0	0	0	0	0	0	8929.52	1	1	49.1849	44.56
DATA	2252	27	42	0	0	A_44_P428997	NM_001107661	7777.92	372.247	5.959392e+002	5.973970e+001	618	41	1.015436e+001	0	0	0	0	0	0	555.503	1	1	47.8731	41
DATA	2253	27	43	0	0	A_42_P619926	NM_001106578	7803.52	372.067	4.805982e+002	4.824160e+001	523.5	43	6.072434e+000	0	0	0	0	0	0	446.594	1	1	48.8603	43.2727
DATA	2255	27	45	0	0	A_44_P524471	NM_001106408	7854.15	371.723	9.138056e+002	9.147758e+001	871.5	41.5	8.763561e+000	0	0	0	0	0	0	843.512	1	1	45.835	41.3333
DATA	2256	27	46	0	0	A_43_P10009	XM_347035	7879.77	371.641	6.735453e+003	6.735585e+002	6254	42.5	8.947821e+000	0	0	0	0	0	0	6194.99	1	1	44.7812	41.5313
DATA	2257	27	47	0	0	A_64_P068112	A_64_P068112	7905.13	371.767	1.146826e+004	1.146833e+003	11100.5	40.5	7.403149e+000	0	0	0	0	0	0	10509.2	1	1	44.4243	39.7857
DATA	2258	27	48	0	0	A_44_P191715	NM_021666	7930.77	372	1.589083e+001	4.545945e+000	80	37	7.306610e+000	0	0	0	0	0	0	14.5057	1	0	47.8731	37.7143
DATA	2259	27	49	0	0	A_64_P035769	NM_001108962	7956	371.774	2.299243e+003	2.299640e+002	2187	39	8.349386e+000	0	0	0	0	0	0	2090.47	1	1	45.4864	40.4074
DATA	2260	27	50	0	0	A_64_P158469	XM_579990	7981.42	372.427	1.535736e+001	4.559904e+000	81	41	1.066971e+001	0	0	0	0	0	0	13.9066	1	0	57.5363	42.9697
DATA	2261	27	51	0	0	A_43_P12811	NM_053464	8006.81	372.261	1.621594e+003	1.622167e+002	1592	39.5	5.241567e+000	0	0	0	0	0	0	1462.16	1	1	46.5243	40.0455
DATA	2262	27	52	0	0	A_44_P370694	NM_001107961	8032.42	372.427	2.870020e+001	5.195390e+000	93	40	6.908587e+000	0	0	0	0	0	0	25.7657	1	1	57.5363	40.1429
DATA	2263	27	53	0	0	A_42_P749550	NM_001109359	8057.48	372.096	4.007356e+003	4.007592e+002	3632	39.5	6.985259e+000	0	0	0	0	0	0	3581.68	1	1	48.5334	39.9231
DATA	2264	27	54	0	0	A_64_P125893	ENSRNOT00000021391	8082.6	372.151	1.790279e+004	1.790284e+003	15263	43	6.792756e+000	0	0	0	0	0	0	15929.3	1	1	48.5334	42.3077
DATA	2265	27	55	0	0	A_44_P1000653	NM_031531	8108.16	372.118	1.271747e+003	1.272504e+002	1184	41	7.937564e+000	0	0	0	0	0	0	1126.29	1	1	46.5243	40.1724
DATA	2266	27	56	0	0	A_64_P035992	A_64_P035992	8133.86	372	3.862120e+002	3.887228e+001	412	41	8.235053e+000	0	0	0	0	0	0	340.406	1	1	42.5954	39.6667
DATA	2267	27	57	0	0	A_42_P592385	NM_022935	8159.33	372.5	1.137371e+001	4.575557e+000	74.5	41	8.511959e+000	0	0	0	0	0	0	9.97757	1	0	57.5363	40.3846
DATA	2268	27	58	0	0	A_64_P065624	ENSRNOT00000039260	8184.5	372.5	1.350250e+001	4.653408e+000	80.5	44	1.040132e+001	0	0	0	0	0	0	11.7885	1	0	57.5363	45
DATA	2269	27	59	0	1	ERCC-00097_63	ERCC-00097_63	8210.18	372.706	4.508620e+001	6.352466e+000	106	41	8.454211e+000	0	0	0	0	0	0	39.1707	1	1	45.835	40
DATA	2270	27	60	0	0	A_42_P477625	NM_001108719	8235	372.5	4.142110e+003	4.142354e+002	3727	40.5	9.895421e+000	0	0	0	0	0	0	3581.32	1	1	48.5334	43.375
DATA	2271	27	61	0	0	A_42_P788030	NM_031618	8260.41	372.254	3.159235e+004	3.159238e+003	27476	43	7.945832e+000	0	0	0	0	0	0	27179.8	1	1	47.5395	43.8929
DATA	2272	27	62	0	0	A_44_P278247	XM_219377	8285.69	372.389	8.991316e+003	8.991431e+002	7573	39	6.161523e+000	0	0	0	0	0	0	7697.74	1	1	48.2044	38.6333
DATA	2273	27	63	0	0	A_44_P189262	NM_024000	8311.25	372.356	1.687855e+004	1.687861e+003	14350	41	1.018592e+001	0	0	0	0	0	0	14378.7	1	1	48.5334	41.8
DATA	2274	27	64	0	0	A_44_P212850	NM_019305	8336.89	372.5	6.833754e+001	8.230183e+000	126	41.5	9.092214e+000	0	0	0	0	0	0	57.9292	1	1	56.9804	40.9063
DATA	2275	27	65	0	0	A_64_P144278	NM_001106525	8362.25	372.342	1.030940e+004	1.030950e+003	8846.5	40	8.377938e+000	0	0	0	0	0	0	8696.46	1	1	48.2044	40.8529
DATA	2276	27	66	0	0	A_44_P683816	NM_001127488	8387.44	372.479	3.898743e+002	3.926151e+001	403	40.5	8.751946e+000	0	0	0	0	0	0	327.309	1	1	48.2044	40.6786
DATA	2277	27	67	0	0	A_64_P048712	A_64_P048712	8413.24	372.515	1.153187e+002	1.243544e+001	165	40	1.030501e+001	0	0	0	0	0	0	96.3442	1	1	46.8651	42.4286
DATA	2278	27	68	0	0	A_64_P012813	NM_001106456	8438.85	372.439	2.229299e+001	5.180082e+000	88	39.5	8.758176e+000	0	0	0	0	0	0	18.5364	1	0	45.835	39.4375
DATA	2280	27	70	0	0	A_42_P598602	NM_001077646	8489.42	372.573	5.363554e+001	7.143665e+000	112.5	39	7.914870e+000	0	0	0	0	0	0	44.1942	1	1	57.5363	38.75
DATA	2281	27	71	0	0	A_44_P375380	NM_001191572	8514.48	372.362	1.670213e+002	1.736150e+001	205	38	6.772872e+000	0	0	0	0	0	0	137.018	1	1	47.5395	38.4444
DATA	2282	27	72	0	0	A_64_P113555	NM_001000025	8540.38	372.458	7.833853e+000	4.823896e+000	74	37.5	7.258912e+000	0	0	0	0	0	0	6.39879	1	0	48.2044	36.8929
DATA	2283	27	73	0	0	A_42_P590466	NM_001009676	8565.43	372.392	3.558916e+003	3.559237e+002	2963.5	38.5	8.341555e+000	0	0	0	0	0	0	2895.12	1	1	49.1849	37.3077
DATA	2284	27	74	0	0	A_44_P224987	XM_001058317	8590.58	372.573	7.177003e+001	8.633055e+000	128	40	9.729814e+000	0	0	0	0	0	0	58.1574	1	1	57.5363	40.0789
DATA	2285	27	75	0	0	A_42_P557315	NM_001106280	8616.06	372.611	6.505343e+003	6.505522e+002	5249.5	40	8.968751e+000	0	0	0	0	0	0	5251.57	1	1	48.2044	41.4706
DATA	2286	27	76	0	0	A_44_P375364	A_44_P375364	8641.5	372.648	1.634554e+002	1.704519e+001	199.5	41.5	8.933946e+000	0	0	0	0	0	0	131.481	1	1	57.5363	42.1538
DATA	2287	27	77	0	0	A_44_P880152	NM_031553	8667	372.545	4.353898e+002	4.380826e+001	420	44	7.833394e+000	0	0	0	0	0	0	349.035	1	1	55.8519	43.1724
DATA	2288	27	78	0	0	A_64_P057575	NM_001191967	8692.64	372.84	1.531544e+002	1.606952e+001	189	43.5	8.786090e+000	0	0	0	0	0	0	122.399	1	1	49.5074	42.6538
DATA	2289	27	79	0	0	A_64_P122183	ENSRNOT00000009823	8717.58	372.573	5.458375e+001	7.321005e+000	112.5	46	1.162368e+001	0	0	0	0	0	0	43.4973	1	1	57.5363	48.2121
DATA	2290	27	80	0	0	A_64_P057587	NM_019313	8743.44	372.672	7.900193e+001	9.292015e+000	128	46.5	1.167534e+001	0	0	0	0	0	0	62.7909	1	1	45.1352	47.4063
DATA	2291	27	81	0	0	A_42_P480769	XM_001081609	8768.56	372.972	6.245590e+002	6.264802e+001	568	44	7.836541e+000	0	0	0	1	0	0	495.303	1	1	48.2044	42.6786
DATA	2292	27	82	0	0	A_42_P623151	NM_031026	8793.88	373.095	2.196265e+004	2.196270e+003	17287	43	7.697448e+000	0	0	0	1	0	0	17383.2	1	1	47.5395	43.5926
DATA	2293	27	83	0	0	A_42_P550241	NM_022954	8819.56	373.148	1.800158e+001	5.239311e+000	82.5	44	5.435496e+000	0	0	0	0	0	0	14.2243	1	0	43.3362	43.2308
DATA	2294	27	84	66	1	DarkCorner	DarkCorner	8844.5	373	4.948004e+000	4.926856e+000	60	41	7.598104e+000	0	0	0	0	0	0	-9.11263	0	0	54.1152	40.2581
DATA	2295	27	85	66	1	DarkCorner	DarkCorner	8870.39	373	4.952746e+000	4.931577e+000	58	40	1.004507e+001	0	0	0	0	0	0	-9.04319	0	0	43.7019	40.7647
DATA	2296	28	1	66	1	DarkCorner	DarkCorner	6749.07	378.597	4.341343e+000	4.322787e+000	61	40	8.750051e+000	0	0	0	0	0	0	-2.55479	0	0	48.2044	40.2292
DATA	2297	28	2	0	0	A_42_P802550	NM_017365	6774.92	378.838	8.706455e+002	8.717091e+001	826	42.5	9.253108e+000	0	0	0	0	0	0	786.339	1	1	47.8731	42.5
DATA	2299	28	4	0	0	A_42_P619926	NM_001106578	6826.09	378.614	4.808491e+002	4.827421e+001	505.5	42.5	8.925974e+000	0	0	0	0	0	0	437.727	1	1	57.259	40.6111
DATA	2300	28	5	0	0	A_64_P052441	ENSRNOT00000004876	6851.61	378.366	6.358246e+001	7.650576e+000	122	45	8.369100e+000	0	0	0	0	0	0	58.0987	1	1	47.8731	44.5641
DATA	2301	28	6	0	0	A_64_P056823	CA510211	6876.61	378.931	1.813650e+001	4.610830e+000	78	41.5	4.322570e+000	0	0	0	0	0	0	16.6338	1	0	53.8203	41.2692
DATA	2302	28	7	0	0	A_42_P669870	NM_001011919	6902	378.797	3.506187e+003	3.506442e+002	3279	38	9.404916e+000	0	0	0	0	0	0	3227.06	1	1	46.8651	39.561
DATA	2303	28	8	0	0	A_42_P683634	NM_012946	6927.5	379	6.890380e+004	6.890381e+003	63558	44.5	8.230978e+000	0	0	0	0	0	0	63638.8	1	1	54.1152	42.8438
DATA	2304	28	9	0	0	A_42_P542809	NM_021671	6952.56	379.028	9.042167e+002	9.051897e+001	875	41	1.351383e+001	0	0	0	0	0	0	837.844	1	1	48.2044	45.9032
DATA	2305	28	10	0	0	A_64_P065887	ENSRNOT00000024693	6978.24	379	3.395917e+002	3.421577e+001	382	42	8.963272e+000	0	0	0	0	0	0	315.667	1	1	46.8651	41.9024
DATA	2306	28	11	0	0	A_64_P043406	NM_001024902	7003.75	379	1.305802e+003	1.306468e+002	1283	41	9.457022e+000	0	0	0	0	0	0	1217.47	1	1	49.1849	42.525
DATA	2307	28	12	0	0	A_64_P060769	NM_001191090	7029	379	1.584020e+003	1.584565e+002	1591	42	8.638498e+000	0	0	0	0	0	0	1481.04	1	1	46.8651	40.9032
DATA	2308	28	13	0	0	A_64_P150789	A_64_P150789	7054.18	378.852	1.678412e+001	4.474028e+000	81	41	7.432389e+000	0	0	0	0	0	0	15.7345	1	0	44.7812	40.3778
DATA	2309	28	14	0	0	A_64_P110254	NM_022404	7080	379	7.800673e+003	7.800783e+002	7489	43	1.126847e+001	0	0	0	0	0	0	7331.7	1	1	54.9904	44.3871
DATA	2310	28	15	0	0	A_42_P700753	FQ212883	7105.17	379	2.503999e+003	2.504339e+002	2430	45.5	1.114630e+001	0	0	0	0	0	0	2358.93	1	1	46.8651	46
DATA	2311	28	16	0	0	A_42_P503768	NM_001009466	7130.38	379	3.624345e+002	3.647666e+001	418	41	9.270032e+000	0	0	0	0	0	0	342.171	1	1	48.5334	42.8276
DATA	2312	28	17	0	0	A_64_P106021	ENSRNOT00000017892	7156.09	379.065	1.276143e+002	1.340691e+001	187	41.5	9.482529e+000	0	0	0	0	0	0	120.722	1	1	54.4085	42.2188
DATA	2313	28	18	0	0	A_43_P10861	NM_001024879	7181.38	379	3.218462e+002	3.244504e+001	373	43	7.397522e+000	0	0	0	0	0	0	305.006	1	1	48.5334	44.16
DATA	2314	28	19	0	0	A_44_P562251	BF545174	7206.61	379.147	1.078141e+002	1.153324e+001	163	45	8.857604e+000	0	0	0	0	0	0	102.338	1	1	48.8603	44.6857
DATA	2315	28	20	0	0	A_42_P608768	ENSRNOT00000009898	7232.42	379.427	2.037496e+002	2.078141e+001	263.5	46.5	6.788588e+000	0	0	0	1	0	0	193.684	1	1	57.5363	46.5278
DATA	2316	28	21	0	0	A_64_P117115	NM_001109329	7258.1	379.346	2.754095e+001	4.926692e+000	91.5	48	1.089994e+001	0	0	0	0	0	0	26.2122	1	1	40.2912	48.6061
DATA	2317	28	22	0	0	A_64_P043331	ENSRNOT00000032411	7283.09	379.386	2.149524e+002	2.187919e+001	274	43	9.923204e+000	0	0	0	0	0	0	204.786	1	1	57.259	43.4054
DATA	2318	28	23	0	0	A_42_P664274	NM_001079705	7308.06	378.825	1.401251e+003	1.401845e+002	1390	41	1.001020e+001	0	0	0	0	0	0	1335.96	1	1	45.4864	41.0882
DATA	2319	28	24	0	0	A_64_P044593	NM_001173451	7333.35	378.725	4.328590e+002	4.347733e+001	486.5	40	8.377389e+000	0	0	0	0	0	0	412.938	1	1	47.2035	40.7742
DATA	2320	28	25	0	0	A_64_P006978	NM_001109371	7359.42	379.427	4.710031e+001	6.227172e+000	113	40	8.870704e+000	0	0	0	0	0	0	44.9546	1	1	57.5363	40.5758
DATA	2321	28	26	0	0	A_64_P119390	NM_001109519	7384.57	379.164	3.152139e+001	5.150126e+000	94.5	39.5	8.131704e+000	0	0	0	0	0	0	30.0904	1	1	48.5334	40.7308
DATA	2322	28	27	0	0	A_64_P034714	A_64_P034714	7410	379.455	1.570509e+001	4.365056e+000	80	40	6.950243e+000	0	0	0	0	0	0	14.9924	1	0	55.8519	39.6
DATA	2323	28	28	0	0	A_44_P535959	NM_001107650	7435	379	4.942896e+002	4.959655e+001	548	38.5	9.917877e+000	0	0	0	0	0	0	471.734	1	1	46.8651	40.4167
DATA	2324	28	29	0	0	A_64_P286274	ENSRNOT00000055318	7460.49	378.984	3.282183e+002	3.307390e+001	382	43	8.040852e+000	0	0	0	0	0	0	313.106	1	1	43.7019	42.0303
DATA	2325	28	30	0	0	A_44_P333384	NM_001024788	7486.29	379.265	2.965601e+001	5.042374e+000	94	39	8.999881e+000	0	0	0	0	0	0	28.2731	1	1	46.8651	40.2581
DATA	2326	28	31	0	0	A_42_P522194	NM_012914	7511.58	379.427	2.221591e+002	2.258771e+001	277	39	6.497337e+000	0	0	0	0	0	0	211.625	1	1	57.5363	39.8462
DATA	2327	28	32	0	0	A_44_P273859	NM_017021	7537	379.455	4.103264e+000	4.086272e+000	67	39	9.668756e+000	0	0	0	0	0	0	0.635507	0	0	55.8519	39.8788
DATA	2328	28	33	0	0	A_43_P11665	NM_013024	7562.39	379.258	6.807135e+001	7.941847e+000	128.5	39	5.241695e+000	0	0	0	0	0	0	64.693	1	1	46.1809	39.7586
DATA	2329	28	34	0	0	A_64_P118273	NM_001170593	7587.63	379.418	5.774666e+001	7.080297e+000	118.5	42.5	9.430998e+000	0	0	0	0	0	0	54.8022	1	1	45.835	42.9091
DATA	2330	28	35	0	0	A_42_P762814	NM_031318	7612.81	379.481	4.313061e+003	4.313256e+002	4061	37	1.031950e+001	0	0	0	0	0	0	4086.45	1	1	49.8279	40.7222
DATA	2331	28	36	0	0	A_44_P384017	NM_031688	7638.12	379.338	4.846972e+002	4.864376e+001	542	41.5	1.056188e+001	0	0	0	0	0	0	458.375	1	1	45.4864	41.9318
DATA	2332	28	37	0	0	A_64_P118872	A_64_P118872	7663.89	379.5	5.060076e+000	4.150637e+000	70.5	38	6.996816e+000	0	0	0	0	0	0	4.77541	1	0	56.9804	39.1176
DATA	2333	28	38	0	0	A_42_P599210	NM_001008326	7689.24	379.38	1.748668e+003	1.749156e+002	1711	37	8.222511e+000	0	0	0	0	0	0	1646.58	1	1	47.5395	39.0741
DATA	2334	28	39	0	0	A_44_P305801	NM_001033894	7714.63	379.37	4.335578e+003	4.335775e+002	4169	40	1.020684e+001	0	0	0	0	0	0	4072.53	1	1	48.2044	44.1111
DATA	2335	28	40	0	0	A_64_P085462	A_64_P085462	7740.33	379.5	5.625805e+004	5.625807e+003	53506.5	43	8.693481e+000	0	0	0	0	0	0	52705.5	1	1	57.5363	42.6875
DATA	2336	28	41	0	0	A_42_P488000	NM_001108479	7765.24	379.5	9.707308e+002	9.716223e+001	970	44	7.395494e+000	0	0	0	0	0	0	906.939	1	1	46.5243	42.88
DATA	2337	28	42	0	0	A_42_P818546	NM_001191600	7790.75	379.627	1.616322e+003	1.616861e+002	1591	41	7.460233e+000	0	0	0	0	0	0	1505.62	1	1	46.1809	40.2647
DATA	2338	28	43	0	0	A_44_P488489	TC610872	7816.25	379.644	2.878587e+003	2.878892e+002	2800.5	46	1.259104e+001	0	0	0	0	0	0	2672.99	1	1	48.5334	48.6429
DATA	2339	28	44	0	0	A_64_P153971	A_64_P153971	7841.72	379.549	1.007268e+001	4.320007e+000	76	44	6.119031e+000	0	0	0	0	0	0	9.32214	1	0	47.8731	44.0938
DATA	2340	28	45	0	0	A_64_P077985	NM_001170478	7867.11	379.5	8.265256e+001	9.278222e+000	143	42	9.204767e+000	0	0	0	0	0	0	76.2285	1	1	65	41.4857
DATA	2341	28	46	0	0	A_44_P576822	NM_080771	7892.24	379.5	1.283123e+003	1.283820e+002	1216.5	41	7.629628e+000	0	0	0	0	0	0	1179.16	1	1	46.5243	41.0294
DATA	2342	28	47	0	0	A_64_P134310	A_64_P134310	7917.89	379.5	6.719725e+001	7.949233e+000	126.5	38	8.898862e+000	0	0	0	0	0	0	61.5181	1	1	56.9804	39.7
DATA	2343	28	48	0	0	A_64_P134706	NM_001107533	7943.57	379.493	4.595751e+001	6.268950e+000	107	38.5	7.324010e+000	0	0	0	0	0	0	41.9074	1	1	49.1849	37.6875
DATA	2344	28	49	0	0	A_42_P469751	XM_001054007	7968.37	379.63	4.966736e+003	4.966920e+002	4545	40.5	1.072134e+001	0	0	0	0	0	0	4511.28	1	1	48.2044	42.8667
DATA	2345	28	50	0	0	A_64_P082653	ENSRNOT00000020906	7994	379.545	9.840305e+001	1.073819e+001	155	41	9.885256e+000	0	0	0	0	0	0	89.0036	1	1	55.8519	41.5806
DATA	2346	28	51	0	0	A_43_P18902	NM_001109221	8019.5	379.648	2.560165e+002	2.596306e+001	296.5	42	9.187195e+000	0	0	0	0	0	0	230.572	1	1	57.5363	43.4074
DATA	2347	28	52	0	0	A_64_P086719	ENSRNOT00000065918	8044.58	379.573	1.230054e+001	4.506858e+000	80	40	7.536210e+000	0	0	0	0	0	0	11.03	1	0	65	40.6087
DATA	2348	28	53	0	0	A_64_P138585	TC587165	8070	379.343	5.208439e+003	5.208621e+002	4627	47	7.936507e+000	0	0	0	0	0	0	4649.4	1	1	45.4864	45.4783
DATA	2349	28	54	0	0	A_64_P230444	ENSRNOT00000010282	8095.44	379.521	8.628291e+003	8.628402e+002	7674	43	6.543338e+000	0	0	0	0	0	0	7667.16	1	1	48.2044	41.3793
DATA	2350	28	55	0	0	A_64_P124427	TC642834	8121.09	379.614	8.397427e+001	9.478414e+000	142	41	7.492940e+000	0	0	0	0	0	0	74.271	1	1	57.259	41.7188
DATA	2351	28	56	0	0	A_42_P778587	NM_001135767	8146.17	379.536	3.270894e+002	3.300576e+001	347	38.5	7.631493e+000	0	0	0	0	0	0	287.944	1	1	47.2035	38.2368
DATA	2352	28	57	0	0	A_42_P526030	NM_057197	8171.61	379.722	9.242180e+003	9.242286e+002	8025	41	1.060646e+001	0	0	0	1	0	0	8097.42	1	1	48.5334	43.0541
DATA	2353	28	58	0	0	A_64_P022561	XM_001070923	8196.81	379.899	9.769365e+001	1.073877e+001	158	43.5	8.181813e+000	0	0	0	0	0	0	85.1858	1	1	46.8651	42.5278
DATA	2354	28	59	0	0	A_64_P126226	NM_001105901	8222.5	380	1.573882e+002	1.636421e+001	204.5	42	9.192763e+000	0	0	0	0	0	0	136.565	1	1	65	42.1
DATA	2355	28	60	0	0	A_64_P089541	NM_001106214	8248	380	4.200527e+002	4.224592e+001	427	43	8.866392e+000	0	0	0	0	0	0	362.691	1	1	54.9904	44.2903
DATA	2356	28	61	0	0	A_44_P205869	NM_138891	8273.07	379.786	5.727800e+002	5.745645e+001	556.5	40	7.369555e+000	0	0	0	0	0	0	492.154	1	1	46.8651	37.8966
DATA	2357	28	62	0	0	A_44_P491796	NM_012881	8298.5	379.944	2.776307e+002	2.813296e+001	304	41	8.640375e+000	0	0	0	0	0	0	237.386	1	1	48.5334	41.2857
DATA	2358	28	63	0	0	A_64_P132706	NM_001008304	8324.5	380	4.262849e+004	4.262852e+003	35650.5	43	1.118246e+001	0	0	0	0	0	0	36267.1	1	1	54.1152	43.1212
DATA	2359	28	64	0	0	A_64_P040715	NM_001011979	8349.22	379.75	1.418179e+003	1.418922e+002	1281.5	40	8.143868e+000	0	0	0	0	0	0	1200.78	1	1	45.1352	39.5
DATA	2360	28	65	0	0	A_44_P191055	NM_001107693	8374.56	379.972	3.150214e+003	3.150552e+002	2711	39	9.101079e+000	0	0	0	0	0	0	2654.55	1	1	48.2044	40.5938
DATA	2361	28	66	0	0	A_64_P077493	XR_005942	8400.36	380.254	4.656061e+000	4.655355e+000	71	40.5	1.040426e+001	0	0	0	0	0	0	3.54147	0	0	46.1809	43.2143
DATA	2362	28	67	0	0	A_44_P317600	NM_012612	8425.63	380.014	2.328851e+002	2.374981e+001	267.5	41.5	1.031124e+001	0	0	0	0	0	0	194.375	1	1	47.2035	43.2647
DATA	2363	28	68	0	0	A_42_P751368	NM_001047874	8450.91	380.104	4.089656e+003	4.089923e+002	3485	40	8.414820e+000	0	0	0	0	0	0	3397.68	1	1	46.8651	38.4667
DATA	2364	28	69	0	0	A_42_P711568	NM_001107584	8476.36	379.87	9.942788e+003	9.942899e+002	8100	40.5	1.020531e+001	0	0	0	1	0	0	8222.5	1	1	46.8651	39.7
DATA	2365	28	70	0	0	A_64_P091817	A_64_P091817	8502	379.797	5.565723e+002	5.585722e+001	534.5	37	6.808755e+000	0	0	0	0	0	0	458.209	1	1	46.8651	36.3226
DATA	2366	28	71	0	0	A_64_P006628	NM_172328	8527.42	379.925	6.377860e+001	7.948079e+000	121	39	7.926070e+000	0	0	0	0	0	0	52.2817	1	1	46.1809	38.125
DATA	2367	28	72	0	0	A_64_P057760	NM_001191643	8552.79	379.857	2.217997e+002	2.268557e+001	252	39	8.738525e+000	0	0	0	0	0	0	181.058	1	1	45.1352	38.1481
DATA	2368	28	73	0	0	A_44_P150013	NM_001134495	8578.09	380.386	4.801913e+000	4.781390e+000	64	39	8.555087e+000	0	0	0	0	0	0	-4.76225	0	0	57.259	36.6875
DATA	2369	28	74	0	0	A_44_P526975	NM_001002822	8603.49	379.881	2.243964e+002	2.294734e+001	253	41	8.382332e+000	0	0	0	0	0	0	181.746	1	1	46.1809	41.2778
DATA	2370	28	75	66	-1	(-)3xSLv1	NegativeControl	8628.91	380.386	4.838082e+000	4.817404e+000	62	39.5	8.574823e+000	0	0	0	0	0	0	-6.2549	0	0	57.259	41.3
DATA	2371	28	76	0	0	A_42_P648937	NM_001191732	8654.3	380.1	2.327434e+003	2.327936e+002	1933	42.5	7.481670e+000	0	0	0	0	0	0	1871.8	1	1	47.2035	42.8462
DATA	2372	28	77	0	0	A_44_P533786	NM_053749	8679.66	380.048	7.822136e+001	9.203677e+000	130	38.5	8.051374e+000	0	0	0	0	0	0	62.7056	1	1	44.4243	40.2308
DATA	2373	28	78	0	0	A_64_P156165	S68987	8705.12	380.28	7.745418e+003	7.745571e+002	6221	45	1.129676e+001	0	0	0	0	0	0	6190.87	1	1	50.7771	46.0286
DATA	2374	28	79	0	0	A_64_P084293	NM_001000525	8730.41	379.952	2.413781e+001	5.442256e+000	87	46	1.089869e+001	0	0	0	0	0	0	19.2398	1	0	44.0646	46.4615
DATA	2375	28	80	0	0	A_42_P708569	NM_001191837	8755.92	379.923	1.057513e+004	1.057524e+003	8495	46	1.122497e+001	0	0	0	0	0	0	8408.63	1	1	46.1809	47.75
DATA	2376	28	81	0	0	A_64_P112215	NM_001110141	8781.42	380.427	8.747384e+002	8.761094e+001	765.5	42	7.490925e+000	0	0	0	0	0	0	694.126	1	1	57.5363	41.963
DATA	2377	28	82	0	0	A_42_P567793	NM_001107668	8806.56	380.466	3.781039e+003	3.781357e+002	3047	43	1.225754e+001	0	0	0	0	0	0	2995.01	1	1	49.1849	45.1071
DATA	2378	28	83	0	0	A_42_P481087	XM_232226	8832	380.455	1.925285e+003	1.925912e+002	1578	41.5	8.185106e+000	0	0	0	0	0	0	1522.8	1	1	55.8519	41.3125
DATA	2379	28	84	66	1	DarkCorner	DarkCorner	8857.42	380.427	4.942104e+000	4.920981e+000	59	41	9.770115e+000	0	0	0	0	0	0	-8.60078	0	0	57.5363	42.2093
DATA	2380	28	85	66	1	DarkCorner	DarkCorner	8882.67	380.5	4.945575e+000	4.924438e+000	62	35	8.714525e+000	0	0	0	0	0	0	-7.63522	0	0	57.5363	36.6676
DATA	2381	29	1	66	1	DarkCorner	DarkCorner	6737.39	386.069	4.343799e+000	4.326706e+000	64	38	9.305883e+000	0	0	0	0	0	0	1.01467	0	0	65	39.1099
DATA	2382	29	2	66	1	DarkCorner	DarkCorner	6762.94	386	4.326132e+000	4.307641e+000	57	41.5	8.375993e+000	0	0	0	0	0	0	-5.35392	0	0	51.4001	41.8125
DATA	2383	29	3	0	0	A_64_P096512	NM_031782	6787.47	386.219	1.116481e+004	1.116489e+003	9581	46	7.763785e+000	0	0	0	0	0	0	10116.2	1	1	48.2044	44.2593
DATA	2384	29	4	0	0	A_44_P172814	NM_173102	6813.09	386.116	2.240609e+004	2.240613e+003	20727	45	4.832684e+000	0	0	0	0	0	0	20381.3	1	1	46.8651	45
DATA	2385	29	5	0	0	A_42_P788040	NM_001025053	6838.58	386.427	2.069412e+002	2.112757e+001	254	44	8.247895e+000	0	0	0	0	0	0	188.97	1	1	57.5363	43.4722
DATA	2386	29	6	0	0	A_42_P808945	NM_181368	6863.89	385.727	3.449915e+003	3.450176e+002	3217.5	41	4.880035e+000	0	0	0	1	0	0	3161.6	1	1	45.835	42.675
DATA	2387	29	7	0	0	A_64_P162713	A_64_P162713	6889.2	386.07	1.778984e+001	4.586201e+000	78	43	7.859392e+000	0	0	0	0	0	0	16.3623	1	0	46.8651	42.2857
DATA	2388	29	8	0	0	A_44_P501204	NM_017361	6914.67	386.087	4.982087e+002	4.999863e+001	523.5	40	9.091048e+000	0	0	0	0	0	0	459.826	1	1	46.5243	40.2703
DATA	2389	29	9	0	0	A_42_P785926	NM_001108289	6940.21	386.176	1.594167e+003	1.594720e+002	1557	46	1.230489e+001	0	0	0	0	0	0	1476.31	1	1	46.1809	44.4063
DATA	2390	29	10	0	0	A_42_P616287	NM_001134555	6965.58	386.427	3.125260e+002	3.153153e+001	356	38.5	9.942526e+000	0	0	0	0	0	0	290.356	1	1	57.5363	40.2813
DATA	2391	29	11	66	-1	(-)3xSLv1	NegativeControl	6991	386.455	4.189921e+000	4.172013e+000	59	41	9.230300e+000	0	0	0	0	0	0	-4.84085	0	0	65	41.8684
DATA	2392	29	12	0	0	A_43_P12365	NM_023101	7016.42	386.427	5.870836e+001	7.195267e+000	118	40	6.807277e+000	0	0	0	0	0	0	54.8692	1	1	65	40.7561
DATA	2393	29	13	0	0	A_64_P076643	ENSRNOT00000057620	7042.21	386.171	4.166332e+000	4.148525e+000	62.5	40.5	9.131254e+000	0	0	0	0	0	0	-0.91404	0	0	46.1809	40.8421
DATA	2394	29	14	0	0	A_64_P074865	XR_008898	7067.42	386.427	7.051659e+000	4.197457e+000	70	41	7.177187e+000	0	0	0	0	0	0	6.6258	1	0	65	41.3514
DATA	2395	29	15	0	0	A_64_P009582	XM_214287	7092.42	386.122	2.757693e+004	2.757696e+003	25338	47.5	1.099911e+001	0	0	0	0	0	0	25972.1	1	1	48.5334	47.8636
DATA	2396	29	16	0	0	A_44_P527270	NM_020073	7117.56	386.233	1.511265e+002	1.566391e+001	206	43	6.795139e+000	0	0	0	0	0	0	142.649	1	1	48.8603	44.087
DATA	2397	29	17	0	0	A_44_P530813	NM_012922	7143.18	386.347	6.228272e+002	6.241821e+001	653	42.5	1.147572e+001	0	0	0	0	0	0	589.12	1	1	47.5395	45.7222
DATA	2398	29	18	0	0	A_64_P078210	NM_001044303	7168.67	386.5	3.756534e+001	5.562609e+000	99.5	39	8.386369e+000	0	0	0	0	0	0	35.5998	1	1	57.5363	41.2581
DATA	2399	29	19	0	0	A_42_P764985	NM_133402	7193.86	386.425	8.056234e+003	8.056338e+002	7605.5	45	7.910210e+000	0	0	0	0	0	0	7647.44	1	1	48.5334	45
DATA	2400	29	20	0	0	A_43_P23097	NM_001011965	7219.5	386.5	6.635784e+001	7.794733e+000	127	46	7.407426e+000	0	0	0	0	0	0	63.0864	1	1	57.5363	45.9688
DATA	2401	29	21	0	0	A_43_P19450	NM_001105713	7245	386.271	2.553554e+002	2.586011e+001	313	48	9.660452e+000	0	0	0	0	0	0	243.077	1	1	46.8651	48.1892
DATA	2402	29	22	0	0	A_42_P514419	NM_001009599	7270.06	386.232	1.410461e+003	1.411051e+002	1383.5	47	8.766975e+000	0	0	0	1	0	0	1344.1	1	1	46.5243	46.8788
DATA	2403	29	23	0	0	A_64_P123974	A_64_P123974	7295.71	386.627	1.320076e+001	4.284395e+000	80	39.5	9.303084e+000	0	0	0	0	0	0	12.5917	1	0	40.2912	37.9688
DATA	2404	29	24	0	0	A_64_P221399	NM_134415	7321.06	386.232	3.575159e+003	3.575391e+002	3501	43	9.141350e+000	0	0	0	0	0	0	3412.47	1	1	46.5243	42.75
DATA	2405	29	25	0	0	A_44_P760124	A_44_P760124	7346.41	386.364	6.704793e+002	6.717142e+001	719	40	1.007275e+001	0	0	0	0	0	0	640.296	1	1	45.1352	41.9091
DATA	2406	29	26	0	0	A_42_P589551	NM_001037093	7371.82	386.6	3.118651e+003	3.118916e+002	3106	42	9.320784e+000	0	0	0	0	0	0	2979.21	1	1	52.6241	41.8235
DATA	2407	29	27	0	0	A_42_P645467	NM_001108804	7397.25	386.592	3.969690e+001	5.685029e+000	102	41	7.777858e+000	0	0	0	0	0	0	37.9253	1	1	49.5074	41.069
DATA	2408	29	28	0	0	A_64_P036006	A_64_P036006	7422.93	386.699	6.464880e+000	4.121011e+000	72	37	9.951731e+000	0	0	0	0	0	0	6.17567	1	0	48.8603	39.5862
DATA	2409	29	29	0	0	A_64_P088575	NM_001106355	7448.33	386.5	4.593990e+002	4.611996e+001	505	40	8.524294e+000	0	0	0	0	0	0	438.694	1	1	57.5363	41.3421
DATA	2410	29	30	0	0	A_42_P798776	XM_002725203	7473.23	386.116	5.614027e+003	5.614175e+002	5442	43	9.215538e+000	0	0	0	0	0	0	5357.99	1	1	46.5243	42.6364
DATA	2411	29	31	0	0	A_64_P017424	XM_001067041	7498.89	386.5	4.094086e+000	4.083653e+000	68	39	7.060748e+000	0	0	0	0	0	0	2.28997	0	0	56.9804	40.6667
DATA	2412	29	32	0	0	A_64_P147358	NM_001105764	7524.06	386.386	1.547997e+003	1.548535e+002	1571	39.5	9.013145e+000	0	0	0	0	0	0	1474.95	1	1	47.2035	39.7333
DATA	2413	29	33	0	0	A_42_P522285	NM_001044263	7549.14	386.5	9.038113e+002	9.047340e+001	911.5	39	5.624352e+000	0	0	0	0	0	0	860.198	1	1	48.5334	38.4333
DATA	2414	29	34	0	0	A_64_P130184	NM_017207	7574.75	386.644	1.626324e+003	1.626839e+002	1620	41	8.740371e+000	0	0	0	0	0	0	1545.76	1	1	48.5334	40.5862
DATA	2415	29	35	0	0	A_44_P167930	NM_012720	7600.15	386.836	5.803847e+003	5.803992e+002	5547.5	40	1.063817e+001	0	0	0	0	0	0	5507.89	1	1	47.5395	41.5278
DATA	2416	29	36	0	0	A_64_P135305	NM_001013426	7625.5	387	6.806253e+003	6.806377e+002	6561	40.5	1.250668e+001	0	0	0	0	0	0	6448.01	1	1	48.5334	41.6471
DATA	2417	29	37	0	0	A_64_P100182	NM_001077678	7651.2	386.365	9.903110e+000	4.229866e+000	75	40	9.096435e+000	0	0	0	0	0	0	9.36274	1	0	49.1849	39.8293
DATA	2418	29	38	0	0	A_44_P521699	NM_001007728	7676.44	386.693	7.606449e+002	7.617603e+001	769	41	6.275349e+000	0	0	0	0	0	0	717.635	1	1	49.1849	40.5
DATA	2419	29	39	0	0	A_64_P053516	NM_001001280	7702	386.545	1.143503e+001	4.286036e+000	76.5	38	9.374791e+000	0	0	0	0	0	0	10.763	1	0	65	40.6207
DATA	2420	29	40	0	0	A_64_P073183	XM_001061392	7727.32	386.727	9.267739e+003	9.267832e+002	8585	40	1.033914e+001	0	0	0	0	0	0	8701.35	1	1	49.8279	43.0909
DATA	2421	29	41	0	0	A_64_P067447	NM_001109440	7752.58	386.573	1.392101e+003	1.392720e+002	1393.5	45	8.378956e+000	0	0	0	0	0	0	1303.5	1	1	57.5363	44.7241
DATA	2422	29	42	0	0	A_64_P089251	NM_001014109	7778.17	386.887	1.476200e+002	1.533807e+001	204	42	6.825518e+000	0	0	0	0	0	0	137.829	1	1	46.8651	41.1563
DATA	2423	29	43	0	0	A_64_P118192	NM_022797	7803.71	386.829	9.990266e+002	9.998994e+001	1015.5	43	7.837325e+000	0	0	0	0	0	0	929.903	1	1	50.7771	42.0968
DATA	2424	29	44	0	0	A_64_P082584	ENSRNOT00000024258	7828.75	387.078	2.389192e+002	2.425656e+001	296	44	6.441273e+000	0	0	0	0	0	0	221.69	1	1	45.4864	43.36
DATA	2425	29	45	0	0	A_42_P465677	NM_001106241	7854.36	386.742	2.684658e+002	2.717383e+001	314.5	44	9.258224e+000	0	0	0	0	0	0	248.249	1	1	46.1809	42.2973
DATA	2426	29	46	0	0	A_42_P781999	NM_001106378	7879.57	386.897	2.650710e+004	2.650713e+003	24316	42.5	8.353547e+000	0	0	0	0	0	0	24425.6	1	1	46.5243	42.6786
DATA	2427	29	47	0	0	A_44_P991472	NM_134374	7905.17	387	1.640388e+003	1.640935e+002	1521	41	9.177144e+000	0	0	0	0	0	0	1505.99	1	1	46.8651	41.7949
DATA	2428	29	48	0	0	A_42_P767737	AY724480	7930.37	387	5.679998e+003	5.680157e+002	5223	36.5	7.897121e+000	0	0	0	0	0	0	5194.9	1	1	46.5243	37.6176
DATA	2429	29	49	0	0	A_42_P648200	NM_001037356	7955.89	386.857	2.646251e+002	2.680448e+001	309	42	9.945019e+000	0	0	0	0	0	0	241.06	1	1	46.8651	42.8182
DATA	2430	29	50	0	0	A_64_P006062	NM_001191695	7981.37	386.957	1.384537e+002	1.449343e+001	189	42	9.222227e+000	0	0	0	0	0	0	125.609	1	1	46.8651	42.129
DATA	2431	29	51	0	0	A_42_P728230	NM_001037782	8006.5	387	4.161155e+003	4.161378e+002	3765	41	1.066704e+001	0	0	0	0	0	0	3759.47	1	1	48.5334	44
DATA	2432	29	52	0	0	A_64_P106011	A_64_P106011	8032.43	386.921	1.100154e+001	4.460196e+000	78	44	1.005402e+001	0	0	0	0	0	0	9.89571	1	0	44.0646	44.4
DATA	2433	29	53	0	0	A_42_P622661	NM_001024292	8057.37	386.866	2.479165e+003	2.479545e+002	2275	41.5	7.524728e+000	0	0	0	0	0	0	2220.29	1	1	45.835	41.6923
DATA	2434	29	54	0	0	A_42_P619844	NM_001030037	8082.72	386.905	9.796989e+003	9.797086e+002	8438.5	44	8.036623e+000	0	0	0	0	0	0	8734.6	1	1	48.8603	42.0714
DATA	2436	29	56	0	0	A_64_P128260	XM_001056985	8133.46	387.083	1.145236e+003	1.146081e+002	1098	39.5	9.217795e+000	0	0	0	0	0	0	1011.66	1	1	48.2044	40
DATA	2437	29	57	0	0	A_44_P1034950	NM_053294	8159.08	387	4.262009e+002	4.284891e+001	455	39	8.095905e+000	0	0	0	0	0	0	374.692	1	1	46.8651	38.1765
DATA	2438	29	58	0	0	A_64_P080316	NM_139113	8184.5	387	3.051283e+002	3.083470e+001	333	43	1.102525e+001	0	0	0	0	0	0	266.968	1	1	54.1152	43.1053
DATA	2439	29	59	0	0	A_64_P053069	NM_001106820	8209.9	387.25	9.077076e+002	9.088052e+001	867	42	9.491845e+000	0	0	0	0	0	0	790.387	1	1	47.8731	40.8293
DATA	2440	29	60	0	0	A_42_P498066	NM_031136	8235.42	387.427	9.244311e+004	9.244312e+003	78760.5	45	1.025733e+001	0	0	0	0	0	0	80104.7	1	1	57.5363	45.2903
DATA	2441	29	61	0	0	A_44_P277068	ENSRNOT00000058491	8260.73	386.806	7.678937e+003	7.679070e+002	6821.5	40.5	1.016691e+001	0	0	0	0	0	0	6621.08	1	1	45.1352	41.6154
DATA	2442	29	62	0	0	A_44_P685613	XM_225679	8285.91	387.104	2.053122e+003	2.053622e+002	1834	40	7.905227e+000	0	0	0	0	0	0	1761.8	1	1	46.8651	38.7241
DATA	2443	29	63	0	0	A_64_P124364	ENSRNOT00000015807	8311.39	387.051	3.274980e+002	3.306479e+001	350	39	1.250531e+001	0	0	0	0	0	0	279.651	1	1	43.3362	44.129
DATA	2444	29	64	0	0	A_42_P466362	NM_017142	8336.58	387.427	6.109453e+002	6.126558e+001	582	38.5	7.869910e+000	0	0	0	1	0	0	519.205	1	1	57.5363	38.5
DATA	2445	29	65	0	0	A_64_P081517	ENSRNOT00000037639	8362.21	386.879	1.247825e+002	1.329833e+001	177	38.5	7.830650e+000	0	0	0	0	0	0	105.519	1	1	43.3362	38.1176
DATA	2446	29	66	0	0	A_42_P629394	NM_031683	8387.46	387.254	3.239654e+003	3.239983e+002	2764	41	9.871839e+000	0	0	0	0	0	0	2726.66	1	1	47.5395	43.1034
DATA	2447	29	67	0	0	A_44_P500975	NM_001000833	8413	387.455	5.254395e+001	7.010718e+000	111.5	41	7.629344e+000	0	0	0	0	0	0	44.0151	1	1	55.8519	41.7241
DATA	2448	29	68	0	0	A_64_P165046	ENSRNOT00000015927	8438.25	387.583	7.768089e+001	9.060048e+000	133	38	7.517117e+000	0	0	0	0	0	0	64.7722	1	1	48.5334	38.175
DATA	2449	29	69	0	0	A_44_P222865	XM_235305	8463.92	386.794	1.072904e+004	1.072914e+003	9085	43	9.411414e+000	0	0	0	0	0	0	8903.56	1	1	45.4864	41.3333
DATA	2451	29	71	0	0	A_64_P131688	XM_574187	8514.5	387.279	7.374512e+000	4.783226e+000	76	38	8.401869e+000	0	0	0	0	0	0	6.06671	1	0	46.5243	38.4839
DATA	2452	29	72	0	0	A_42_P556457	NM_001033931	8540.34	387.184	3.112689e+003	3.113051e+002	2661	42	7.620406e+000	0	0	0	1	0	0	2549.65	1	1	49.5074	41.6
DATA	2453	29	73	0	0	A_42_P734384	NM_001108406	8565.3	387.029	4.933793e+003	4.934023e+002	4140	36.5	8.203658e+000	0	0	0	1	0	0	4025.06	1	1	46.1809	36.5
DATA	2454	29	74	0	0	A_42_P728032	XM_001066058	8590.8	387.61	2.212916e+003	2.213433e+002	1868	41	9.021003e+000	0	0	0	0	0	0	1798.45	1	1	51.4001	40.6129
DATA	2455	29	75	0	0	A_64_P151525	A_64_P151525	8616.63	387.556	1.224918e+002	1.315686e+001	168.5	44	8.064137e+000	0	0	0	0	0	0	99.1725	1	1	40.6843	43.697
DATA	2456	29	76	0	0	A_43_P19276	ENSRNOT00000039523	8641.68	387.529	7.985804e+002	8.000330e+001	714.5	38	8.023362e+000	0	0	0	0	0	0	644.302	1	1	51.7088	40.3214
DATA	2457	29	77	0	0	A_44_P529811	NM_001107657	8666.89	387.5	2.267041e+001	5.339897e+000	87.5	45	1.063865e+001	0	0	0	0	0	0	18.2306	1	0	65	46.0294
DATA	2458	29	78	0	0	A_64_P104640	A_64_P104640	8692.56	387.479	2.736676e+004	2.736680e+003	22523	42	1.134371e+001	0	0	0	0	0	0	21938.8	1	1	48.2044	44.5862
DATA	2459	29	79	0	0	A_64_P003234	NM_001109048	8717.67	387.5	4.668284e+001	6.741311e+000	104	45	9.734695e+000	0	0	0	0	0	0	37.3195	1	1	57.5363	46.4167
DATA	2460	29	80	0	0	A_64_P097158	NM_001000875	8743.33	387.5	4.896850e+000	4.875921e+000	68	46	1.109893e+001	0	0	0	0	0	0	-1.77337	0	0	57.5363	45.8462
DATA	2461	29	81	0	0	A_64_P141814	NM_001134629	8768.5	387.5	2.690579e+002	2.734598e+001	288	46	8.157286e+000	0	0	0	0	0	0	214.059	1	1	57.5363	44.8148
DATA	2462	29	82	0	0	A_42_P463602	NM_001107592	8793.89	387.5	4.917386e+000	4.912056e+000	71	43.5	1.030127e+001	0	0	0	0	0	0	3.11465	0	0	65	45.4333
DATA	2463	29	83	0	0	A_64_P083366	NM_001077643	8819.36	387.742	1.887058e+004	1.887064e+003	15282	40	8.299197e+000	0	0	0	0	0	0	14960.5	1	1	46.1809	39.28
DATA	2464	29	84	0	0	A_44_P121039	NM_172008	8844.8	387.69	1.265689e+003	1.266642e+002	1065	41	9.172684e+000	0	0	0	0	0	0	1002.15	1	1	47.2035	43.027
DATA	2465	29	85	66	1	DarkCorner	DarkCorner	8870.83	387.72	4.935841e+000	4.914745e+000	60.5	36	1.010256e+001	0	0	0	0	0	0	-7.54688	0	0	49.1849	38.2069
DATA	2466	30	1	66	1	DarkCorner	DarkCorner	6749.89	393.28	4.329630e+000	4.311125e+000	61	42	8.073896e+000	0	0	0	0	0	0	-2.88957	0	0	50.7771	42.8298
DATA	2467	30	2	0	0	A_42_P687443	NM_020100	6775.33	393.5	2.349606e+002	2.388517e+001	280	42	9.375973e+000	0	0	0	0	0	0	212.752	1	1	57.5363	42.8621
DATA	2468	30	3	0	0	A_42_P563382	ENSRNOT00000055321	6800.5	393.5	2.149186e+003	2.149612e+002	2057.5	46	7.698908e+000	0	0	0	0	0	0	1953.59	1	1	49.1849	45.7813
DATA	2469	30	4	0	0	A_42_P667100	NM_001013932	6826	393.545	2.122804e+003	2.123232e+002	2021	44.5	7.808184e+000	0	0	0	0	0	0	1937.03	1	1	55.8519	43.5
DATA	2470	30	5	0	0	A_42_P553319	TC597248	6851.16	393.197	1.229338e+002	1.300578e+001	180	42	7.733837e+000	0	0	0	0	0	0	112.584	1	1	44.7812	42.8421
DATA	2471	30	6	0	0	A_64_P151358	NM_181695	6876.67	393.5	3.630122e+001	5.573945e+000	100	41	4.676600e+000	0	0	0	0	0	0	33.3672	1	1	57.5363	41.8
DATA	2472	30	7	0	0	A_44_P196743	ENSRNOT00000007795	6902.33	393.5	4.232971e+000	4.214879e+000	57.5	42.5	8.805256e+000	0	0	0	0	0	0	-4.42077	0	0	57.5363	42.8056
DATA	2474	30	9	0	0	A_64_P127111	NM_001106004	6952.74	393.778	1.294638e+004	1.294645e+003	12037.5	45	1.123923e+001	0	0	0	0	0	0	12021.1	1	1	47.5395	44.9655
DATA	2475	30	10	0	0	A_42_P470775	NM_001025126	6977.94	393.768	3.501765e+003	3.502014e+002	3331.5	41	8.796091e+000	0	0	0	0	0	0	3261.5	1	1	46.5243	41.3939
DATA	2476	30	11	0	0	A_44_P472855	NM_001000961	7003.18	394.183	1.557119e+002	1.611779e+001	215	43	6.289573e+000	0	0	0	0	0	0	145.462	1	1	47.5395	42.6111
DATA	2477	30	12	0	0	A_64_P080682	NM_001109652	7029.33	393.5	9.769685e+000	4.263705e+000	73	42.5	6.601816e+000	0	0	0	0	0	0	9.15211	1	0	57.5363	42.175
DATA	2478	30	13	0	0	A_42_P727368	NM_001025693	7054.51	393.411	1.623708e+002	1.675643e+001	213	40	7.805647e+000	0	0	0	1	0	0	152.503	1	1	48.5334	40.9545
DATA	2479	30	14	0	0	A_64_P034427	A_64_P034427	7080	393.545	4.116755e+003	4.116962e+002	4008.5	46	9.938026e+000	0	0	0	0	0	0	3876.26	1	1	55.8519	45.8333
DATA	2480	30	15	0	0	A_64_P042871	A_64_P042871	7104.9	393.311	7.426642e+002	7.438060e+001	785	51	1.227468e+001	0	0	0	0	0	0	700.841	1	1	44.4243	50.7667
DATA	2481	30	16	0	0	A_64_P152617	NM_001105747	7130.27	393.781	4.128576e+000	4.110930e+000	62.5	44	6.147753e+000	0	0	0	0	0	0	-1.4434	0	0	45.1352	44.5556
DATA	2482	30	17	0	0	A_44_P468879	NM_001007798	7155.8	393.455	3.806962e+001	5.597123e+000	99	42	9.307255e+000	0	0	0	0	0	0	36.0737	1	1	46.1809	42.875
DATA	2483	30	18	0	0	A_44_P252976	NM_001012071	7181.35	393.652	2.296310e+002	2.332549e+001	285	40	8.513247e+000	0	0	0	0	0	0	217.984	1	1	47.2035	42.2414
DATA	2484	30	19	0	0	A_64_P014080	NM_022189	7206.91	393.614	1.023093e+001	4.215206e+000	75.5	44.5	7.131187e+000	0	0	0	0	0	0	9.72742	1	0	65	45.2813
DATA	2485	30	20	0	0	A_44_P204789	NM_001025684	7232.42	393.573	9.986448e+002	9.994793e+001	1016	49	7.750367e+000	0	0	0	0	0	0	950.815	1	1	57.5363	47.4545
DATA	2486	30	21	0	0	A_64_P030373	NM_001127319	7257.58	393.573	4.628254e+001	6.168980e+000	107	48	9.860114e+000	0	0	0	0	0	0	44.1179	1	1	57.5363	49.3143
DATA	2487	30	22	0	0	A_42_P558703	NM_001106810	7282.87	393.771	7.592788e+002	7.603713e+001	780	44	1.163003e+001	0	0	0	0	0	0	724.501	1	1	46.5243	44.5152
DATA	2488	30	23	0	0	A_44_P241190	NM_001013199	7308.33	393.671	1.078986e+003	1.079754e+002	1096	40	1.049314e+001	0	0	0	0	0	0	1030.38	1	1	48.2044	39.8
DATA	2489	30	24	0	0	A_42_P539095	XM_001081794	7333.61	393.931	1.047096e+003	1.047886e+002	1077	40	7.931155e+000	0	0	0	0	0	0	1000.54	1	1	53.8203	39.75
DATA	2490	30	25	0	0	A_64_P010905	ENSRNOT00000057216	7359	394	2.329631e+002	2.364868e+001	287.5	41	9.774679e+000	0	0	0	0	0	0	222.694	1	1	46.8651	40.5625
DATA	2491	30	26	0	0	A_44_P500660	NM_001007645	7384.38	394	6.273603e+002	6.286768e+001	661	38	9.544576e+000	0	0	0	0	0	0	599.82	1	1	48.5334	40.0323
DATA	2492	30	27	0	0	A_64_P056436	A_64_P056436	7410.03	393.864	3.212828e+002	3.238462e+001	369	40	9.695564e+000	0	0	0	0	0	0	307.168	1	1	46.5243	42.6786
DATA	2493	30	28	0	0	A_42_P773816	NM_017079	7435.27	393.781	2.881357e+002	2.909926e+001	342	38	6.629078e+000	0	0	0	0	0	0	275.413	1	1	48.2044	38.2821
DATA	2494	30	29	0	0	A_64_P138604	NM_001009967	7460.5	394	5.329798e+004	5.329800e+003	49960.5	43	9.061911e+000	0	0	0	0	0	0	50924.1	1	1	54.1152	44.7586
DATA	2495	30	30	0	0	A_42_P705302	NM_001107361	7485.91	393.896	1.075651e+004	1.075659e+003	10280	38	8.231981e+000	0	0	0	0	0	0	10270.8	1	1	46.8651	39.6
DATA	2496	30	31	0	0	A_64_P027259	NM_001191656	7511.64	393.837	2.444864e+004	2.444867e+003	23983.5	38	8.105142e+000	0	0	0	0	0	0	23324.5	1	1	49.5074	37.88
DATA	2497	30	32	0	0	A_44_P288333	ENSRNOT00000006659	7536.71	393.754	4.209450e+002	4.229172e+001	472	39	7.293243e+000	0	0	0	0	0	0	401.172	1	1	45.1352	38.4839
DATA	2498	30	33	0	0	A_42_P618217	NM_130752	7562.5	394	1.026746e+002	1.105011e+001	170	41	7.357610e+000	0	0	0	0	0	0	97.7302	1	1	54.1152	40.0263
DATA	2499	30	34	0	0	A_64_P151587	A_64_P151587	7587.71	394.061	4.108037e+000	4.090946e+000	66	42.5	1.069694e+001	0	0	0	0	0	0	0.587719	0	0	39.4933	43.2308
DATA	2500	30	35	0	0	A_42_P771107	NM_001108217	7613.07	394.074	9.284811e+002	9.293846e+001	955.5	43	1.134575e+001	0	0	0	0	0	0	881.05	1	1	46.8651	45.2571
DATA	2501	30	36	0	0	A_42_P689013	NM_053800	7638	394.203	1.920924e+004	1.920929e+003	18283	42	8.989221e+000	0	0	0	0	0	0	18195.2	1	1	46.8651	41.4878
DATA	2502	30	37	0	0	A_64_P155334	NM_001100945	7663.7	394.029	3.699161e+003	3.699389e+002	3595	41	6.907842e+000	0	0	0	0	0	0	3496.6	1	1	46.1809	40.4194
DATA	2503	30	38	0	0	A_64_P049007	A_64_P049007	7689.57	394	4.389094e+001	6.021567e+000	107	37.5	6.974349e+000	0	0	0	0	0	0	41.3932	1	1	45.835	39.1923
DATA	2504	30	39	0	0	A_44_P351461	ENSRNOT00000027179	7714.74	394.153	5.205328e+001	6.646179e+000	116	39	1.079956e+001	0	0	0	0	0	0	48.9743	1	1	47.8731	41.75
DATA	2505	30	40	0	0	A_44_P604267	NM_022933	7740	393.774	6.765185e+002	6.777860e+001	710	40	8.285859e+000	0	0	0	0	0	0	634.831	1	1	45.4864	42.1429
DATA	2506	30	41	0	0	A_64_P070475	XM_001061514	7765.5	394.352	5.937037e+000	4.196746e+000	70.5	44	6.813101e+000	0	0	0	0	0	0	5.55602	1	0	57.5363	43.9688
DATA	2507	30	42	0	0	A_64_P119963	A_64_P119963	7790.88	394.267	3.010164e+003	3.010452e+002	2917	39.5	6.941174e+000	0	0	0	0	0	0	2808.65	1	1	52.3208	39.4286
DATA	2508	30	43	0	0	A_42_P658562	NM_001134416	7816.42	394.427	5.213967e+002	5.230694e+001	549	44	1.210465e+001	0	0	0	0	0	0	484.975	1	1	57.5363	46.6786
DATA	2509	30	44	0	0	A_64_P116830	A_64_P116830	7841.58	394.427	1.257145e+002	1.325243e+001	185	41	8.927915e+000	0	0	0	0	0	0	116.553	1	1	65	41.6786
DATA	2510	30	45	0	0	A_64_P048531	ENSRNOT00000019473	7867.11	394.5	1.205535e+002	1.276867e+001	182	44	9.610926e+000	0	0	0	0	0	0	111.383	1	1	56.9804	43.3548
DATA	2511	30	46	0	0	A_64_P122716	NM_139331	7892.5	394.352	6.994041e+000	4.280786e+000	74	41	8.374067e+000	0	0	0	0	0	0	6.43868	1	0	57.5363	40.4375
DATA	2512	30	47	0	0	A_64_P077323	NM_201992	7917.89	394.5	1.315455e+001	4.438429e+000	76	37.5	9.940955e+000	0	0	0	0	0	0	12.065	1	0	56.9804	39.875
DATA	2513	30	48	0	0	A_42_P569711	NM_001108977	7943.03	394.061	4.734498e+002	4.753585e+001	496.5	37	8.093467e+000	0	0	0	1	0	0	432.549	1	1	46.8651	37.7143
DATA	2514	30	49	0	0	A_42_P474100	NM_001191820	7968.38	394.237	6.595684e+003	6.595822e+002	6047	45	9.301751e+000	0	0	0	0	0	0	6001.96	1	1	49.1849	43.5484
DATA	2515	30	50	0	0	A_64_P026404	A_64_P026404	7994.11	394.5	4.308703e+000	4.290287e+000	62.5	40	1.053789e+001	0	0	0	0	0	0	-4.17025	0	0	56.9804	41.8
DATA	2516	30	51	0	0	A_64_P026581	ENSRNOT00000029099	8019.11	394.352	7.037770e+003	7.037902e+002	6501	44.5	1.001700e+001	0	0	0	0	0	0	6350.99	1	1	47.8731	46.0667
DATA	2517	30	52	0	0	A_64_P043624	NM_133565	8044.5	394.5	4.245983e+003	4.246204e+002	3975	41	9.433911e+000	0	0	0	0	0	0	3815.08	1	1	46.5243	43.0357
DATA	2518	30	53	0	0	A_44_P417429	NM_001011983	8070.03	394.127	2.067159e+003	2.067616e+002	1953.5	44	8.155186e+000	0	0	0	0	0	0	1848.99	1	1	46.8651	42.5938
DATA	2519	30	54	0	0	A_64_P007574	ENSRNOT00000028681	8095.44	394.267	2.028696e+004	2.028701e+003	17951	44	6.421119e+000	0	0	0	0	0	0	18064	1	1	49.1849	42.3333
DATA	2520	30	55	0	0	A_42_P529690	NM_001173510	8120.8	394.239	2.972620e+004	2.972624e+003	26381	38	7.978739e+000	0	0	0	0	0	0	26347.1	1	1	46.8651	40.2188
DATA	2521	30	56	0	0	A_42_P505070	TC624062	8146.11	394.352	7.877383e+003	7.877506e+002	6864	40	8.736772e+000	0	0	0	1	0	0	6949.5	1	1	47.8731	40.2581
DATA	2522	30	57	0	0	A_42_P504653	NM_017143	8171.67	394.5	1.081692e+002	1.168816e+001	160.5	40	9.244586e+000	0	0	0	0	0	0	94.9754	1	1	57.5363	41.9355
DATA	2523	30	58	0	0	A_64_P017891	A_64_P017891	8197.16	394.239	8.863779e+000	4.536974e+000	74	40	1.030096e+001	0	0	0	0	0	0	7.74497	1	0	45.835	41.5
DATA	2524	30	59	0	0	A_42_P642724	NM_001107585	8222.57	394.48	4.395732e+003	4.395959e+002	3883	41	7.335768e+000	0	0	0	0	0	0	3822.52	1	1	49.5074	40.5357
DATA	2525	30	60	0	0	A_42_P780943	NM_001011906	8248	394.545	1.290889e+003	1.291670e+002	1180.5	43.5	1.165914e+001	0	0	0	0	0	0	1117.12	1	1	55.8519	44.75
DATA	2526	30	61	0	0	A_44_P482325	NM_145669	8273.11	394.352	1.333134e+003	1.333899e+002	1171	38	7.276786e+000	0	0	0	0	0	0	1148.11	1	1	47.8731	37.625
DATA	2527	30	62	0	0	A_42_P716750	NM_001024757	8298.44	394.479	8.272696e+002	8.285125e+001	752	38	8.719432e+000	0	0	0	0	0	0	709.014	1	1	48.2044	38.4815
DATA	2528	30	63	0	0	A_64_P009565	NM_001191823	8324.06	394.464	1.525611e+002	1.592264e+001	203	39	6.718294e+000	0	0	0	0	0	0	130.113	1	1	47.5395	40.7241
DATA	2529	30	64	0	0	A_42_P495969	NM_012824	8349.37	394.529	8.939486e+003	8.939603e+002	7732	38	7.652738e+000	0	0	0	1	0	0	7587.57	1	1	46.5243	38.7576
DATA	2530	30	65	0	0	A_64_P154671	ENSRNOT00000024704	8375	394.545	1.667854e+002	1.730202e+001	207	42	9.295343e+000	0	0	0	0	0	0	140.879	1	1	55.8519	41.8182
DATA	2531	30	66	0	0	A_44_P111337	NM_001108724	8400.18	394.361	3.370692e+003	3.371010e+002	2928	40	7.014347e+000	0	0	0	0	0	0	2833.68	1	1	47.8731	41.3571
DATA	2532	30	67	0	0	A_42_P665627	NM_023095	8425.78	394.851	8.821119e+001	9.969915e+000	142	42	9.377904e+000	0	0	0	0	0	0	73.8148	1	1	46.1809	42.1515
DATA	2533	30	68	0	0	A_44_P447585	NM_001166676	8451.46	394.4	1.829696e+001	5.013991e+000	84	41	9.257524e+000	0	0	0	0	0	0	15.2386	1	0	47.5395	39.3333
DATA	2534	30	69	0	0	A_42_P463754	NM_030994	8476.56	394.521	1.436421e+003	1.437186e+002	1283	41	8.564686e+000	0	0	0	1	0	0	1191.03	1	1	48.2044	41.0769
DATA	2535	30	70	0	0	A_42_P644717	NM_001108927	8501.92	394.522	2.558651e+001	5.359754e+000	90	40	8.993474e+000	0	0	0	0	0	0	21.1225	1	1	46.1809	40.5152
DATA	2536	30	71	0	0	A_42_P546539	NM_001135801	8527.25	394.627	9.359264e+002	9.371207e+001	847	39	9.475909e+000	0	0	0	1	0	0	769.367	1	1	46.1809	40.25
DATA	2537	30	72	0	0	A_42_P818297	XM_001073988	8552.63	394.63	1.807924e+003	1.808548e+002	1566.5	39	7.288524e+000	0	0	0	0	0	0	1480.06	1	1	48.2044	37.5484
DATA	2538	30	73	0	0	A_64_P047416	NM_001109501	8578.09	394.614	3.089111e+002	3.125693e+001	321.5	36	8.546598e+000	0	0	0	0	0	0	251.885	1	1	57.259	35.5172
DATA	2539	30	74	0	0	A_43_P18389	XM_002726292	8603.57	395	1.735021e+001	5.090760e+000	83	41	7.436219e+000	0	0	0	0	0	0	14.0945	1	0	48.5334	41.2121
DATA	2540	30	75	0	0	A_64_P044276	NM_001105946	8628.94	394.768	5.264048e+003	5.264267e+002	4289	39	7.813798e+000	0	0	0	0	0	0	4260.7	1	1	46.5243	40.0938
DATA	2541	30	76	0	0	A_64_P059475	ENSRNOT00000029976	8654.42	394.573	4.840752e+000	4.837880e+000	70.5	43	6.855655e+000	0	0	0	0	0	0	3.34603	0	0	57.5363	43
DATA	2542	30	77	0	0	A_64_P005496	A_64_P005496	8679.5	395	6.632257e+000	4.880040e+000	73	41	9.317736e+000	0	0	0	0	0	0	5.33339	1	0	54.1152	41.9655
DATA	2544	30	79	0	0	A_42_P739860	NM_133578	8730.44	394.973	2.997262e+003	2.997657e+002	2336	44	1.000612e+001	0	0	0	0	0	0	2396.78	1	1	48.5334	44.925
DATA	2545	30	80	0	0	A_42_P681251	NM_030844	8756.12	394.939	3.583609e+003	3.583940e+002	3049	45	1.080652e+001	0	0	0	0	0	0	2858.74	1	1	46.5243	43.6757
DATA	2546	30	81	0	0	A_42_P567793	NM_001107668	8781.24	395	3.846852e+003	3.847162e+002	3156	46	8.929608e+000	0	0	0	0	0	0	3062.47	1	1	46.8651	43.7407
DATA	2547	30	82	0	0	A_64_P041662	NM_182843	8806.68	395	7.042142e+002	7.059115e+001	628	39.5	1.220139e+001	0	0	0	0	0	0	559.636	1	1	49.1849	42.9231
DATA	2548	30	83	0	0	A_42_P534679	NM_001134974	8831.77	395.04	3.240864e+003	3.241234e+002	2573	40	8.737882e+000	0	0	0	0	0	0	2571.91	1	1	48.8603	40.1667
DATA	2549	30	84	66	1	DarkCorner	DarkCorner	8857.02	395.492	4.924872e+000	4.903822e+000	61	39	9.542642e+000	0	0	0	0	0	0	-7.84231	0	0	43.7019	41.5581
DATA	2550	30	85	66	1	DarkCorner	DarkCorner	8882.85	395.397	4.928374e+000	4.907309e+000	60	35	8.462457e+000	0	0	0	0	0	0	-8.91319	0	0	47.5395	36.0679
DATA	2551	31	1	66	1	DarkCorner	DarkCorner	6736.88	400.857	4.332814e+000	4.317907e+000	63	38	9.089842e+000	0	0	0	0	0	0	1.5911	0	0	48.5334	38.8191
DATA	2552	31	2	0	0	A_42_P576549	NM_001106490	6762.36	400.791	1.353752e+001	4.505322e+000	75	42	7.139536e+000	0	0	0	0	0	0	12.2484	1	0	45.835	42.8378
DATA	2553	31	3	0	0	A_42_P542638	NM_001012202	6787.82	400.831	9.040061e+002	9.050189e+001	879.5	43	1.072651e+001	0	0	0	0	0	0	821.139	1	1	47.2035	44.5161
DATA	2554	31	4	0	0	A_42_P765736	NM_001025670	6813.42	400.573	8.016347e+001	9.079825e+000	137	44	6.670832e+000	0	0	0	0	0	0	73.0936	1	1	57.5363	43
DATA	2555	31	5	0	0	A_44_P372461	NM_001170708	6838.36	400.742	1.056224e+003	1.057078e+002	1047	45	7.487624e+000	0	0	0	0	0	0	966.64	1	1	46.1809	45.2581
DATA	2556	31	6	0	0	A_64_P070554	XM_001059856	6864	401.066	3.953008e+001	5.791379e+000	101	43	6.224864e+000	0	0	0	0	0	0	36.312	1	1	44.0646	43.8158
DATA	2557	31	7	0	0	A_64_P030859	ENSRNOT00000045252	6889.21	400.935	1.687590e+004	1.687595e+003	15537	41.5	8.650257e+000	0	0	0	0	0	0	15556.1	1	1	45.4864	41.619
DATA	2558	31	8	0	0	A_64_P079260	NM_001005546	6914.56	401.03	5.318775e+002	5.335359e+001	561	42	9.313187e+000	0	0	0	0	0	0	491.956	1	1	45.4864	42.9286
DATA	2559	31	9	0	0	A_64_P149846	A_64_P149846	6940	401	1.969787e+004	1.969791e+003	18839	45	1.048374e+001	0	0	0	0	0	0	18279.2	1	1	46.8651	44.8621
DATA	2560	31	10	0	0	A_64_P120624	NM_031634	6965.5	401	1.170840e+001	4.337476e+000	75.5	43	1.172961e+001	0	0	0	0	0	0	10.8995	1	0	54.1152	45.8529
DATA	2561	31	11	0	0	A_64_P158020	NM_001008909	6991	401	7.653131e+001	8.712546e+000	137.5	42.5	8.055253e+000	0	0	0	0	0	0	71.4588	1	1	54.9904	41.375
DATA	2562	31	12	0	0	A_64_P116606	NM_153724	7016.41	401.113	9.130495e+001	1.003020e+001	147.5	43	7.769446e+000	0	0	0	0	0	0	85.4981	1	1	47.8731	42.9167
DATA	2563	31	13	0	0	A_44_P532436	ENSRNOT00000006946	7041.5	401	3.767708e+001	5.598513e+000	102	41	7.535266e+000	0	0	0	0	0	0	35.3745	1	1	54.1152	41.7632
DATA	2564	31	14	0	0	A_64_P027545	NM_023095	7067.28	400.905	1.950073e+002	1.993335e+001	251	42	7.646576e+000	0	0	0	0	0	0	183.56	1	1	48.8603	43.4474
DATA	2565	31	15	0	0	A_64_P076705	NM_017088	7092.5	401	1.086535e+005	1.086535e+004	101324	49.5	8.396061e+000	0	0	0	0	0	0	102518	1	1	54.1152	50.4231
DATA	2566	31	16	0	0	A_44_P238642	NM_001127201	7117.79	401	4.834273e+003	4.834448e+002	4554	44.5	1.002302e+001	0	0	0	0	0	0	4571.28	1	1	46.8651	47.4333
DATA	2567	31	17	0	0	A_64_P037249	NM_001105802	7143.37	401.043	9.679413e+001	1.051319e+001	157	44	8.534601e+000	0	0	0	0	0	0	91.7157	1	1	46.8651	44.0513
DATA	2568	31	18	0	0	A_64_P061524	NM_172064	7168.92	401.091	3.354155e+002	3.379067e+001	386	40	7.302102e+000	0	0	0	0	0	0	318.409	1	1	47.8731	42.3
DATA	2569	31	19	0	0	A_42_P536564	NM_001008344	7193.79	401.194	4.497479e+003	4.497665e+002	4282	43	7.583874e+000	0	0	0	0	0	0	4276.44	1	1	47.5395	43
DATA	2570	31	20	0	0	A_64_P062433	NM_001135804	7219.29	401.246	8.412930e+002	8.422831e+001	874.5	44	6.954228e+000	0	0	0	0	0	0	801.133	1	1	45.1352	45.1935
DATA	2571	31	21	0	0	A_42_P665509	NM_053777	7244.95	400.907	4.510205e+004	4.510206e+003	43463	49	7.437830e+000	0	0	0	0	0	0	43003	1	1	46.8651	47.1081
DATA	2572	31	22	0	0	A_44_P250144	NM_001001373	7270.5	401	4.090688e+000	4.073204e+000	62.5	46	8.452651e+000	0	0	0	0	0	0	-1.6754	0	0	54.1152	46.2258
DATA	2573	31	23	0	0	A_42_P746838	NM_001024286	7295.5	401	2.219314e+001	4.635450e+000	84	42	9.963208e+000	0	0	0	0	0	0	21.2021	1	1	54.1152	42.1
DATA	2574	31	24	0	0	A_44_P210852	NM_001034187	7320.94	400.825	1.232735e+002	1.298089e+001	180.5	42	9.251504e+000	0	0	0	0	0	0	117.848	1	1	45.4864	41.6316
DATA	2575	31	25	0	0	A_64_P019390	A_64_P019390	7346.5	401.352	3.806442e+001	5.568731e+000	103	41	8.736028e+000	0	0	0	0	0	0	36.4089	1	1	57.5363	40.5455
DATA	2576	31	26	0	0	A_64_P134709	NM_001105760	7371.91	401.386	1.973016e+002	2.014427e+001	250	41	1.000521e+001	0	0	0	0	0	0	188.775	1	1	57.259	40.6667
DATA	2578	31	28	0	0	A_64_P028117	NM_001000372	7422.58	401.427	4.885586e+001	6.354732e+000	112.5	41	9.997931e+000	0	0	0	0	0	0	46.7425	1	1	57.5363	42.8
DATA	2579	31	29	0	0	A_44_P391517	NM_001034144	7448.19	401.43	3.016550e+002	3.043817e+001	361.5	40.5	9.582227e+000	0	0	0	0	0	0	288.51	1	1	65	41.3824
DATA	2580	31	30	0	0	A_42_P743682	NM_133599	7473.5	401.352	5.644572e+001	6.957284e+000	123	42	8.904285e+000	0	0	0	0	0	0	53.9567	1	1	65	43.0625
DATA	2581	31	31	0	0	A_64_P163075	NM_001109321	7498.89	401.5	3.426377e+001	5.320401e+000	98.5	38	7.256615e+000	0	0	0	0	0	0	32.7292	1	1	56.9804	37.5385
DATA	2582	31	32	0	0	A_44_P393422	NM_001013188	7524	401.191	1.757615e+003	1.758087e+002	1746	35.5	9.342066e+000	0	0	0	0	0	0	1677.28	1	1	46.8651	37.625
DATA	2583	31	33	0	0	A_44_P288982	NM_001107913	7549.37	401.72	1.150012e+002	1.220195e+001	176.5	39.5	6.059166e+000	0	0	0	0	0	0	109.625	1	1	48.5334	39.5278
DATA	2584	31	34	0	0	A_64_P009788	NM_001191099	7575.11	401.5	1.794493e+001	4.461075e+000	82	41	7.199630e+000	0	0	0	0	0	0	17.0823	1	0	56.9804	41.1875
DATA	2585	31	35	0	0	A_42_P764228	NM_031707	7600.12	401.418	4.209014e+003	4.209213e+002	4067	46	1.279651e+001	0	0	0	0	0	0	4000.56	1	1	46.1809	44.8378
DATA	2586	31	36	0	0	A_64_P161621	NM_001101015	7625.67	401.5	3.065431e+002	3.092697e+001	363	38.5	9.675147e+000	0	0	0	0	0	0	290.854	1	1	57.5363	40.1429
DATA	2587	31	37	0	0	A_42_P763522	NM_001013980	7651.3	401.47	4.392123e+003	4.392315e+002	4265	42.5	9.383307e+000	0	0	0	0	0	0	4159.17	1	1	51.7088	41.381
DATA	2588	31	38	0	0	A_64_P029935	NM_001109299	7676.64	401.13	6.675439e+002	6.688108e+001	715	37	7.770242e+000	0	0	0	0	0	0	630.773	1	1	46.8651	39.72
DATA	2589	31	39	0	0	A_64_P045053	A_64_P045053	7702.11	401.5	2.820150e+002	2.850144e+001	331.5	44	8.433456e+000	0	0	0	0	0	0	265.873	1	1	56.9804	42.5833
DATA	2590	31	40	0	0	A_42_P540920	NM_001135045	7727.06	401.389	3.903121e+003	3.903340e+002	3672	38	8.645164e+000	0	0	0	0	0	0	3670.63	1	1	48.2044	40.4412
DATA	2591	31	41	0	0	A_64_P055323	NM_001191930	7752.82	401.379	4.991960e+002	5.009142e+001	535	44	7.227014e+000	0	0	0	0	0	0	468.186	1	1	45.4864	43.7838
DATA	2592	31	42	0	0	A_64_P047162	NM_153472	7778.06	401.611	6.172846e+003	6.172986e+002	5737.5	41	7.576629e+000	0	0	0	0	0	0	5773.12	1	1	48.2044	41.303
DATA	2593	31	43	0	0	A_64_P279594	NM_001170476	7803.5	401.5	1.284731e+001	4.363222e+000	78	43	1.029683e+001	0	0	0	0	0	0	11.9788	1	0	57.5363	43.2308
DATA	2594	31	44	0	0	A_42_P665509	NM_053777	7828.74	401.5	4.612157e+004	4.612159e+003	42132	44	1.361838e+001	0	0	0	0	0	0	42867.5	1	1	50.4627	46.0909
DATA	2595	31	45	0	0	A_64_P106638	NM_001108198	7854.5	401.5	6.523376e+001	7.757047e+000	128	43.5	1.081317e+001	0	0	0	0	0	0	60.4253	1	1	65	43.4643
DATA	2596	31	46	0	0	A_64_P141245	NM_001105920	7879.39	401.563	1.793929e+003	1.794424e+002	1721	43.5	1.373530e+001	0	0	0	0	0	0	1656.01	1	1	47.8731	45.4615
DATA	2597	31	47	0	0	A_42_P503739	FQ231471	7904.95	401.466	1.947896e+004	1.947901e+003	17779	41	9.217425e+000	0	0	0	0	0	0	17915.2	1	1	48.5334	41.9333
DATA	2598	31	48	0	0	A_44_P282433	NM_033230	7930.5	401.5	7.765450e+002	7.777036e+001	779.5	39.5	8.711203e+000	0	0	0	1	0	0	711.484	1	1	57.5363	40.6667
DATA	2599	31	49	0	0	A_42_P585750	NM_001202463	7956	401.545	3.470583e+001	5.494927e+000	98	44	9.943369e+000	0	0	0	0	0	0	31.673	1	1	55.8519	42.2
DATA	2600	31	50	0	0	A_42_P523517	FQ229104	7981.11	401.648	6.328601e+003	6.328745e+002	5849	41	1.068807e+001	0	0	0	0	0	0	5752.53	1	1	47.8731	41.7879
DATA	2601	31	51	0	0	A_64_P126190	NM_001113789	8006.78	402.074	2.217820e+001	4.833905e+000	85.5	43	1.052483e+001	0	0	0	0	0	0	20.0756	1	1	46.5243	46.1852
DATA	2602	31	52	0	0	A_42_P549675	NM_080577	8031.79	401.806	4.890202e+003	4.890393e+002	4263	44	9.972511e+000	0	0	0	1	0	0	4407.81	1	1	47.5395	44.0588
DATA	2603	31	53	0	0	A_42_P535644	NM_024400	8057.31	401.389	1.149014e+003	1.149831e+002	1110	40	7.713624e+000	0	0	0	1	0	0	1031.06	1	1	48.2044	40
DATA	2604	31	54	0	0	A_64_P050233	XM_345239	8083	401.545	2.139427e+002	2.183247e+001	254	43	6.767446e+000	0	0	0	0	0	0	191.116	1	1	55.8519	41.7143
DATA	2605	31	55	0	0	A_64_P121575	NM_001013144	8108.42	401.573	7.022664e+001	8.272469e+000	132	40	6.967327e+000	0	0	0	0	0	0	62.4483	1	1	57.5363	40.8929
DATA	2606	31	56	0	0	A_64_P018263	NM_012728	8133.58	401.573	3.450567e+002	3.478410e+001	370.5	40	1.286916e+001	0	0	0	0	0	0	305.432	1	1	57.5363	42
DATA	2607	31	57	0	0	A_64_P164682	TC600307	8159.06	401.768	1.169766e+004	1.169774e+003	10465	40	8.602267e+000	0	0	0	0	0	0	10306	1	1	46.5243	38.5313
DATA	2608	31	58	0	0	A_44_P1045612	NM_172317	8184.13	402.029	5.263172e+002	5.281812e+001	547.5	41	8.958354e+000	0	0	0	0	0	0	461.549	1	1	46.8651	41.4286
DATA	2609	31	59	0	0	A_42_P529514	NM_001008308	8209.93	401.986	6.732114e+002	6.746839e+001	672	39	7.820548e+000	0	0	0	0	0	0	587.496	1	1	46.8651	39.1951
DATA	2610	31	60	0	0	A_44_P870348	NM_001107522	8235.08	401.94	5.284792e+002	5.303717e+001	525	44	1.089284e+001	0	0	0	0	0	0	458.991	1	1	46.8651	44.0333
DATA	2611	31	61	0	0	A_64_P108264	XM_223835	8260.53	401.898	1.035533e+002	1.129016e+001	158	40	1.159561e+001	0	0	0	0	0	0	89.5015	1	1	42.9674	42.6207
DATA	2612	31	62	0	0	A_42_P754784	CB328432	8285.68	401.618	7.516193e+003	7.516329e+002	6317.5	37.5	6.714905e+000	0	0	0	0	0	0	6464.87	1	1	46.5243	36.8571
DATA	2613	31	63	0	0	A_64_P084525	NM_001101001	8311.16	401.882	2.399486e+003	2.399915e+002	2107.5	38	7.638078e+000	0	0	0	0	0	0	2053.94	1	1	46.5243	38.9333
DATA	2614	31	64	0	0	A_64_P378583	NM_001099516	8336.8	402.125	4.583601e+000	4.564010e+000	66.5	37	6.185658e+000	0	0	0	0	0	0	-0.381808	0	0	42.2201	37.9355
DATA	2615	31	65	0	0	A_64_P154172	NM_001000557	8362.02	401.875	4.605663e+000	4.585978e+000	58	37	9.411433e+000	0	0	0	0	0	0	-10.7476	0	0	42.5954	38.6216
DATA	2616	31	66	0	0	A_64_P074634	NM_001024287	8387.69	401.986	2.610659e+002	2.651014e+001	286	41	8.158558e+000	0	0	0	0	0	0	220.271	1	1	47.2035	40.3
DATA	2617	31	67	1028	1	(+)E1A_r60_a22	E1A_r60_a22	8413.06	401.988	2.255453e+002	2.302478e+001	256	41.5	7.515403e+000	0	0	0	0	0	0	189.411	1	1	49.8279	41.0588
DATA	2618	31	68	0	0	A_43_P12780	NM_053350	8438.15	401.864	1.301694e+002	1.382286e+001	171	40	8.338732e+000	0	0	0	0	0	0	108.815	1	1	46.1809	38.6286
DATA	2619	31	69	0	0	A_44_P442169	NM_001013034	8463.78	401.866	5.859218e+003	5.859404e+002	4865	41	8.348601e+000	0	0	0	0	0	0	4875.67	1	1	46.1809	39.2368
DATA	2620	31	70	0	0	A_64_P093894	A_64_P093894	8489.47	401.759	3.036914e+001	5.590147e+000	96	40	7.290249e+000	0	0	0	0	0	0	25.1578	1	1	42.9674	40.9091
DATA	2621	31	71	0	0	A_64_P073378	NM_001025287	8514.5	402	1.121205e+003	1.122195e+002	962	42	7.669798e+000	0	0	0	0	0	0	924.907	1	1	48.5334	43.3226
DATA	2622	31	72	0	0	A_64_P096076	A_64_P096076	8540	402	4.753199e+000	4.732884e+000	57	39	6.766806e+000	0	0	0	0	0	0	-10.4392	0	0	65	39.7059
DATA	2623	31	73	0	0	A_42_P471835	TC610276	8565.56	402	4.841647e+003	4.841881e+002	3958	40	7.840675e+000	0	0	0	0	0	0	3961.16	1	1	49.8279	37.9286
DATA	2624	31	74	0	0	A_42_P767737	AY724480	8590.63	402	5.542663e+003	5.542869e+002	4541	41	8.578535e+000	0	0	0	0	0	0	4517.44	1	1	48.5334	40.5357
DATA	2625	31	75	0	0	A_64_P016393	A_64_P016393	8616.35	402.086	5.052553e+003	5.052780e+002	4197	40	7.610036e+000	0	0	0	0	0	0	4102.73	1	1	49.5074	39.5333
DATA	2626	31	76	0	0	A_42_P803752	XM_580093	8641.69	401.657	1.949850e+001	5.185627e+000	86	40	6.872074e+000	0	0	0	0	0	0	15.7767	1	0	45.835	41.5556
DATA	2627	31	77	0	0	A_42_P589025	NM_134363	8666.91	402.386	5.528008e+004	5.528010e+003	42887	47.5	9.078974e+000	0	0	0	0	0	0	44590.4	1	1	57.259	45.0278
DATA	2628	31	78	0	0	A_64_P107938	NM_001000930	8692.43	401.984	4.855811e+000	4.835057e+000	64	42.5	1.187337e+001	0	0	0	0	0	0	-3.60538	0	0	44.0646	45.5882
DATA	2629	31	79	0	0	A_64_P088817	A_64_P088817	8717.92	402.211	4.611594e+002	4.637010e+001	446	43	1.029206e+001	0	0	0	0	0	0	369.809	1	1	46.8651	43.0667
DATA	2630	31	80	0	0	A_64_P000579	A_64_P000579	8743.06	402.232	2.333625e+004	2.333630e+003	18540	43	1.087042e+001	0	0	0	0	0	0	18667.4	1	1	46.5243	43.6923
DATA	2631	31	81	0	0	A_44_P570046	TC630334	8768.46	402.321	5.987130e+002	6.006912e+001	547	45	8.690220e+000	0	0	0	0	0	0	477.881	1	1	50.1463	42.7083
DATA	2632	31	82	0	0	A_44_P431629	NM_001106835	8794	402.455	2.275418e+002	2.327162e+001	251.5	46	9.114446e+000	0	0	0	0	0	0	181.278	1	1	55.8519	45.8387
DATA	2634	31	84	0	0	A_42_P485932	NM_001034927	8844.63	402.36	1.658628e+004	1.658635e+003	13090.5	39	1.057599e+001	0	0	0	1	0	0	13177	1	1	48.8603	40.4194
DATA	2635	31	85	66	1	DarkCorner	DarkCorner	8870.11	402.5	4.918843e+000	4.897819e+000	61	39	8.270666e+000	0	0	0	0	0	0	-5.6396	0	0	65	40.3673
DATA	2636	32	1	66	1	DarkCorner	DarkCorner	6749.69	408.179	4.318609e+000	4.300151e+000	61	41	8.950069e+000	0	0	0	0	0	0	-2.49918	0	0	45.835	40.9796
DATA	2637	32	2	0	0	A_64_P048366	ENSRNOT00000059330	6774.91	408.116	2.268333e+003	2.268738e+002	2161.5	43	9.561136e+000	0	0	0	0	0	0	2058.84	1	1	46.8651	44.0625
DATA	2638	32	3	0	0	A_44_P1058980	NM_001012036	6800.37	408.36	2.244147e+003	2.244553e+002	2100.5	43	1.116101e+001	0	0	0	0	0	0	2044.82	1	1	48.8603	44.5455
DATA	2639	32	4	0	0	A_64_P062562	ENSRNOT00000027655	6825.72	408.045	6.275581e+001	7.579938e+000	123	44	9.778021e+000	0	0	0	0	0	0	57.3933	1	1	45.835	44.0741
DATA	2640	32	5	0	0	A_44_P490100	ENSRNOT00000043641	6851.5	408.352	5.280449e+001	6.769079e+000	114	42	6.009670e+000	0	0	0	0	0	0	48.474	1	1	65	43.129
DATA	2641	32	6	0	0	A_42_P473886	NM_001165922	6876.58	408.427	4.333064e+002	4.353569e+001	488.5	41	8.498956e+000	0	0	0	0	0	0	399.171	1	1	57.5363	43.0323
DATA	2642	32	7	0	0	A_64_P393339	ENSRNOT00000057753	6902.42	408.427	8.115147e+001	9.140203e+000	136.5	41.5	8.381046e+000	0	0	0	0	0	0	75.02	1	1	57.5363	41.375
DATA	2643	32	8	0	0	A_44_P461154	NM_053819	6927.23	408.116	6.419727e+002	6.433401e+001	649	43	7.219637e+000	0	0	0	0	0	0	595.365	1	1	46.5243	43.1379
DATA	2644	32	9	0	0	A_42_P701991	NM_001100671	6952.62	408.43	5.547655e+003	5.547813e+002	5159	47	1.010860e+001	0	0	0	0	0	0	5161.53	1	1	50.4627	46.9394
DATA	2645	32	10	1028	1	(+)E1A_r60_1	E1A_r60_1	6978.38	408.309	4.183820e+000	4.174332e+000	67	42	8.971008e+000	0	0	0	0	0	0	2.46921	0	0	46.5243	42.5135
DATA	2646	32	11	0	0	A_44_P541230	ENSRNOT00000010675	7003.37	408.37	2.651153e+003	2.651478e+002	2509	43	6.703845e+000	0	0	0	0	0	0	2481.32	1	1	48.2044	41.6923
DATA	2647	32	12	0	0	A_64_P004593	NM_001166761	7029.03	409.047	9.896088e+000	4.258690e+000	73	43	7.485171e+000	0	0	0	0	0	0	9.28877	1	0	46.1809	43.0278
DATA	2648	32	13	0	0	A_64_P018385	ENSRNOT00000063845	7054.03	408.843	1.170896e+001	4.294356e+000	72.5	42	7.502601e+000	0	0	0	0	0	0	11.0182	1	0	46.8651	43.2439
DATA	2649	32	14	0	0	A_64_P017590	NM_001000096	7079.89	408.5	4.139275e+000	4.121584e+000	58	47	9.788300e+000	0	0	0	0	0	0	-5.40269	0	0	56.9804	47.5405
DATA	2650	32	15	0	0	A_42_P810118	XM_001075984	7104.96	408.452	1.071240e+003	1.072029e+002	1074	47	1.013281e+001	0	0	0	0	0	0	1012.77	1	1	48.5334	48.4118
DATA	2651	32	16	0	0	A_42_P772157	NM_017020	7130.25	408.356	1.483040e+003	1.483607e+002	1441.5	45	8.990198e+000	0	0	0	0	0	0	1405	1	1	48.5334	46.0968
DATA	2652	32	17	0	0	A_42_P542809	NM_021671	7155.86	408.716	9.046065e+002	9.055332e+001	938	45	9.102584e+000	0	0	0	0	0	0	858.706	1	1	48.5334	45.1842
DATA	2653	32	18	0	0	A_42_P645352	NM_001126371	7181.23	408.378	3.961408e+003	3.961619e+002	3805.5	42.5	7.441671e+000	0	0	0	0	0	0	3766.79	1	1	49.1849	42.4615
DATA	2654	32	19	0	0	A_64_P106933	NM_001130493	7206.42	408.8	8.620291e+001	9.538059e+000	147	46	9.434605e+000	0	0	0	0	0	0	82.0983	1	1	45.4864	45.6
DATA	2655	32	20	0	0	A_42_P614175	NM_033237	7231.81	408.533	1.238759e+003	1.239430e+002	1201.5	48.5	7.595617e+000	0	0	0	0	0	0	1181.35	1	1	49.5074	46.9412
DATA	2656	32	21	0	0	A_64_P147190	NM_031840	7257.63	408.5	2.593045e+003	2.593365e+002	2602	47	5.627387e+000	0	0	0	0	0	0	2475.82	1	1	47.8731	47.1034
DATA	2657	32	22	0	0	A_43_P11268	NM_031762	7282.93	408.417	9.690868e+003	9.690954e+002	8948	44	1.030232e+001	0	0	0	0	0	0	9261.69	1	1	48.2044	43.2571
DATA	2658	32	23	0	0	A_64_P022215	A_64_P022215	7308.3	408.478	1.839336e+002	1.883717e+001	242	43	8.946384e+000	0	0	0	0	0	0	175.926	1	1	46.8651	44.2564
DATA	2659	32	24	0	0	A_64_P001080	NM_001109379	7333.67	408.5	1.157685e+002	1.226896e+001	176.5	41	7.201378e+000	0	0	0	0	0	0	110.793	1	1	57.5363	40.7879
DATA	2660	32	25	0	0	A_42_P468662	NM_001108886	7359.18	408.455	2.043331e+003	2.043735e+002	2014	43	9.677567e+000	0	0	0	0	0	0	1956.25	1	1	52.6241	41.697
DATA	2661	32	26	0	0	A_42_P522285	NM_001044263	7384.27	408.658	9.108003e+002	9.117048e+001	933	40.5	9.551167e+000	0	0	0	0	0	0	872.156	1	1	50.4627	41.4688
DATA	2662	32	27	0	0	A_42_P478500	NM_177421	7410	408.545	1.428313e+005	1.428313e+004	134260	44	1.306043e+001	0	0	0	0	0	0	136766	1	1	55.8519	46.8857
DATA	2663	32	28	0	0	A_42_P739860	NM_133578	7435.22	408.824	3.117335e+003	3.117600e+002	2988.5	42	9.291920e+000	0	0	0	0	0	0	2984.37	1	1	48.2044	41.1613
DATA	2664	32	29	0	0	A_42_P708614	NM_001130505	7460.58	408.573	4.588421e+004	4.588423e+003	43213	41.5	7.786796e+000	0	0	0	0	0	0	43906.9	1	1	57.5363	42.5909
DATA	2665	32	30	0	0	A_64_P067000	NM_001108721	7486.42	408.573	1.344382e+003	1.344997e+002	1339	37	6.390717e+000	0	0	0	0	0	0	1285.61	1	1	57.5363	38.2143
DATA	2666	32	31	0	0	A_44_P590748	NM_001109199	7511.3	408.507	1.156448e+002	1.225945e+001	180	37	8.623224e+000	0	0	0	0	0	0	110.498	1	1	46.8651	38.12
DATA	2667	32	32	0	0	A_42_P742797	NM_001106761	7536.81	408.581	4.427020e+003	4.427207e+002	4295	36	8.838333e+000	0	0	0	0	0	0	4225.58	1	1	52.3208	37.871
DATA	2668	32	33	0	0	A_42_P761277	NM_001008297	7561.82	408.667	1.904794e+003	1.905230e+002	1897	40	4.220710e+000	0	0	0	0	0	0	1815.92	1	1	47.5395	39.4242
DATA	2669	32	34	0	0	A_42_P503739	FQ231471	7587.27	408.863	1.972743e+004	1.972747e+003	18693	46	5.567764e+000	0	0	0	0	0	0	18780.2	1	1	48.2044	47
DATA	2670	32	35	0	0	A_42_P635760	ENSRNOT00000023806	7612.75	408.974	9.488234e+003	9.488322e+002	9159	42	1.238365e+001	0	0	0	0	0	0	9017.94	1	1	49.1849	44
DATA	2671	32	36	0	0	A_64_P136337	ENSRNOT00000064588	7638.03	408.873	8.038871e+003	8.038975e+002	7487	40.5	7.994082e+000	0	0	0	0	0	0	7626.41	1	1	46.8651	40.7381
DATA	2672	32	37	0	0	A_64_P128316	ENSRNOT00000062007	7663.91	408.614	1.873392e+001	4.513886e+000	84.5	42	7.297901e+000	0	0	0	0	0	0	17.7356	1	0	57.259	41.7941
DATA	2673	32	38	0	0	A_64_P050799	A_64_P050799	7689.41	408.742	1.429318e+002	1.487399e+001	201.5	38	6.604785e+000	0	0	0	0	0	0	135.016	1	1	45.835	39.3333
DATA	2674	32	39	0	0	A_42_P701779	NM_001108048	7714.51	408.634	3.275596e+003	3.275856e+002	3071	43	9.271929e+000	0	0	0	0	0	0	3086.81	1	1	47.8731	42.7407
DATA	2675	32	40	0	0	A_42_P604900	NM_199117	7739.77	408.913	5.495976e+003	5.496132e+002	5199.5	42	7.147573e+000	0	0	0	0	0	0	5166.09	1	1	46.5243	42.3659
DATA	2676	32	41	0	0	A_44_P1060444	NM_001106644	7765.12	409.044	5.058875e+003	5.059045e+002	4719.5	42	7.906685e+000	0	0	0	0	0	0	4742.22	1	1	46.8651	43.1481
DATA	2677	32	42	0	0	A_64_P090339	NM_001000756	7790.48	409.046	5.254032e+001	6.701324e+000	115.5	40	5.895644e+000	0	0	0	0	0	0	49.1078	1	1	44.4243	40.5172
DATA	2678	32	43	0	0	A_42_P770556	NM_033096	7816.1	408.986	9.584037e+003	9.584128e+002	8768	44	1.585493e+001	0	0	0	0	0	0	8929.87	1	1	46.8651	45.0741
DATA	2679	32	44	0	0	A_44_P606502	NM_001130502	7841.5	409	1.160342e+001	4.344186e+000	75.5	44	1.249714e+001	0	0	0	0	0	0	10.7762	1	0	65	45.6129
DATA	2680	32	45	0	0	A_64_P372189	NM_212516	7867.09	408.935	5.501006e+004	5.501007e+003	50804	42	1.079984e+001	0	0	0	0	0	0	50912.4	1	1	54.4085	42.3548
DATA	2681	32	46	0	0	A_42_P540518	NM_199399	7892.24	409	3.503698e+003	3.503951e+002	3227	37	7.822404e+000	0	0	0	0	0	0	3231.3	1	1	46.8651	38.76
DATA	2682	32	47	0	0	A_64_P158955	ENSRNOT00000020260	7917.61	408.931	1.437610e+001	4.468906e+000	80	39	8.772578e+000	0	0	0	0	0	0	13.2092	1	0	65	40.3793
DATA	2683	32	48	0	0	A_44_P325841	NM_024130	7943.17	409	1.865445e+003	1.865929e+002	1777	39	9.110022e+000	0	0	0	0	0	0	1707.42	1	1	46.8651	39.2973
DATA	2684	32	49	0	0	A_64_P007743	XM_001071416	7968.56	409.028	2.196588e+002	2.237604e+001	267	42	1.228435e+001	0	0	0	0	0	0	200.254	1	1	48.2044	42.697
DATA	2685	32	50	0	0	A_64_P136213	A_64_P136213	7994	409	4.300602e+000	4.298732e+000	69.5	39.5	1.025671e+001	0	0	0	0	0	0	3.41751	0	0	54.9904	41.8
DATA	2686	32	51	0	0	A_43_P17392	NM_001191693	8019.17	409	3.107129e+003	3.107427e+002	2873	44	9.744510e+000	0	0	0	0	0	0	2809.27	1	1	46.8651	45.3077
DATA	2687	32	52	0	0	A_42_P708569	NM_001191837	8044.51	409.13	1.054344e+004	1.054353e+003	9445	41	7.839995e+000	0	0	0	0	0	0	9491.91	1	1	47.2035	41.4138
DATA	2688	32	53	0	0	A_64_P062068	XM_002728030	8070	409	2.778898e+002	2.812551e+001	324	42	9.597571e+000	0	0	0	0	0	0	249.064	1	1	46.8651	42.3077
DATA	2689	32	54	0	0	A_43_P20266	NM_001106416	8095.57	408.853	2.094746e+002	2.139593e+001	260	43	6.649278e+000	0	0	0	0	0	0	186.893	1	1	47.2035	41.2903
DATA	2690	32	55	0	0	A_44_P248235	NM_001106048	8120.96	409.217	4.726899e+001	6.442490e+000	110	40.5	8.461088e+000	0	0	0	0	0	0	41.9828	1	1	46.8651	40.5294
DATA	2691	32	56	0	0	A_64_P134717	NM_001101007	8146.63	408.833	1.159642e+001	4.548621e+000	78	39	7.644696e+000	0	0	0	0	0	0	10.2507	1	0	43.3362	38.2
DATA	2692	32	57	0	0	A_44_P555005	NM_001000944	8171.58	409.427	6.515976e+001	7.872703e+000	126	40	8.194975e+000	0	0	0	0	0	0	57.3376	1	1	57.5363	40.875
[truncated: 6,319,962 more chars]
