# Supplementary material for: Gene Expression in the Hippocampus in a Rat Model of Premenstrual Dysphoric Disorder After Treatment With Baixiangdan Capsules
Source: Front Psychol. 2018 Nov 13;9:2065. doi: 10.3389/fpsyg.2018.02065 (PMC6242977; doi:10.3389/fpsyg.2018.02065)
Supplement: Supplementary file 2 [file Data_Sheet_2.ZIP › Raw Data Files/17_11.txt]

TYPE	text	text	text	integer	text	float	float	text	integer	text	text	integer	integer	integer	integer	float	float	float	float	float	float	text	text	text	text	text	text	text	text	text	text	text	integer	integer	integer	text	integer	boolean
FEPARAMS	Protocol_Name	Protocol_date	Scan_ScannerName	Scan_NumChannels	Scan_Date	Scan_MicronsPerPixelX	Scan_MicronsPerPixelY	Scan_OriginalGUID	Scan_NumScanPass	Grid_Name	Grid_Date	Grid_NumSubGridRows	Grid_NumSubGridCols	Grid_NumRows	Grid_NumCols	Grid_RowSpacing	Grid_ColSpacing	Grid_OffsetX	Grid_OffsetY	Grid_NomSpotWidth	Grid_NomSpotHeight	Grid_GenomicBuild	FeatureExtractor_Barcode	FeatureExtractor_Sample	FeatureExtractor_ScanFileName	FeatureExtractor_ArrayName	FeatureExtractor_ScanFileGUID	FeatureExtractor_DesignFileName	FeatureExtractor_ExtractionTime	FeatureExtractor_UserName	FeatureExtractor_ComputerName	FeatureExtractor_Version	FeatureExtractor_IsXDRExtraction	FeatureExtractor_ColorMode	FeatureExtractor_QCReportType	DyeNorm_NormFilename	DyeNorm_NormNumProbes	Grid_IsGridFile
DATA	GE1_1100_Jul11 (Read Only)	1-Jul-2011 22:30	Agilent Technologies Scanner G2505C US10450393	1	07-11-2013 11:28:19	5	5	8c21e7b3-da0c-49e9-bbfb-25825691cb4f	1	028282_D_F_20120224	24-Feb-2012 00:00	1	1	532	85	73.3235	63.5	0	36.6617	65	65	rn4:RGSCv3.4:Nov2004	1_2		M:\2013.07.11 Rat GE 1-color 4x44k(sunpeng)\\US10450393_S01.tif	US10450393_S01	713781a6-1ed3-4c46-9d98-6375925679d3	028282_D_F_20120224.xml	11-Jul-2013 15:13:54	admin	KCSY01	11.0.1.1	0	0	0		0	0
*
TYPE	float	float	float	integer	integer	float	float	float	integer	float	float	float	integer	float	float	integer	integer	integer	integer	integer	float	float	float	integer	float	float	float	float	float	integer	integer	float	float	float	float	float	integer	float	float	float	float	integer	float	float	float	float	float	integer	float	float	float	float	float	float	float	integer	float	integer	float	float	float	float	integer	float	float	float	float	text	float	float	float	float	float	float	float	float	float	float	float	float	float	float	float	float	float	float	float	float	float	integer	integer	integer	integer	float	integer	text	integer	text	float	float	float	integer	boolean	float	float	boolean	float	boolean	float	boolean	float	boolean	float	boolean	float	boolean	float	boolean	float	boolean	float	boolean	float	boolean	float	boolean
STATS	gDarkOffsetAverage	gDarkOffsetMedian	gDarkOffsetStdDev	gDarkOffsetNumPts	gSaturationValue	gAvgSig2BkgeQC	gAvgSig2BkgNegCtrl	gRatioSig2BkgeQC_NegCtrl	gNumSatFeat	gLocalBGInlierNetAve	gLocalBGInlierAve	gLocalBGInlierSDev	gLocalBGInlierNum	gGlobalBGInlierAve	gGlobalBGInlierSDev	gGlobalBGInlierNum	gNumFeatureNonUnifOL	gNumPopnOL	gNumNonUnifBGOL	gNumPopnBGOL	gOffsetUsed	gGlobalFeatInlierAve	gGlobalFeatInlierSDev	gGlobalFeatInlierNum	AnyColorPrcntFeatNonUnifOL	AnyColorPrcntBGNonUnifOL	AnyColorPrcntFeatPopnOL	AnyColorPrcntBGPopnOL	TotalPrcntFeatOL	gNumNegBGSubFeat	gNonCtrlNumNegFeatBGSubSig	gSpatialDetrendRMSFit	gSpatialDetrendRMSFilteredMinusFit	gSpatialDetrendSurfaceArea	gSpatialDetrendVolume	gSpatialDetrendAveFit	gNonCtrlNumSatFeat	gNonCtrl99PrcntNetSig	gNonCtrl50PrcntNetSig	gNonCtrl1PrcntNetSig	gNonCtrlMedPrcntCVBGSubSig	gCtrleQCNumSatFeat	gCtrleQC99PrcntNetSig	gCtrleQC50PrcntNetSig	gCtrleQC1PrcntNetSig	geQCMedPrcntCVBGSubSig	geQCSig2BkgLow2	gNegCtrlNumInliers	gNegCtrlAveNetSig	gNegCtrlSDevNetSig	gNegCtrlAveBGSubSig	gNegCtrlSDevBGSubSig	gAveNumPixOLLo	gAveNumPixOLHi	gPixCVofHighSignalFeat	gNumHighSignalFeat	AddErrorEstimateGreen	TotalNumFeatures	ROIHeight	ROIWidth	CentroidDiffX	CentroidDiffY	NumFoundFeat	MaxNonUnifEdges	MaxSpotNotFoundEdges	gMultDetrendRMSFit	gMultDetrendSurfaceAverage	eQCLowSigName2	eQCOneColorLogLowSignal	eQCOneColorLogLowSignalError	eQCOneColorLogHighSignal	eQCOneColorLinFitLogLowConc	eQCOneColorLinFitLogLowSignal	eQCOneColorLinFitLogHighConc	eQCOneColorLinFitLogHighSignal	eQCOneColorLinFitSlope	eQCOneColorLinFitIntercept	eQCOneColorLinFitRSQ	eQCOneColorSpikeDetectionLimit	gNonCtrl50PrcntBGSubSig	gCtrleQC50PrcntBGSubSig	gMedPrcntCVProcSignal	geQCMedPrcntCVProcSignal	gOutlierFlagger_Auto_FeatB_Term	gOutlierFlagger_Auto_FeatC_Term	gOutlierFlagger_Auto_BgndB_Term	gOutlierFlagger_Auto_BgndC_Term	OutlierFlagger_FeatChiSq	OutlierFlagger_BgndChiSq	GriddingStatus	IsGoodGrid	NumGeneNonUnifOL	TotalNumberOfReplicatedGenes	gPercentileIntensityProcessedSignal	ExtractionStatus	QCMetricResults	gNonCtrlNumWellAboveBG	ImageDepth	AFHold	gPMTVolts	GlassThickness	gDDN	GridHasBeenOptimized	gNegCtrlSpread	Metric_IsGoodGrid	Metric_IsGoodGrid_IsInRange	Metric_AnyColorPrcntFeatNonUnifOL	Metric_AnyColorPrcntFeatNonUnifOL_IsInRange	Metric_gNegCtrlAveNetSig	Metric_gNegCtrlAveNetSig_IsInRange	Metric_gNegCtrlAveBGSubSig	Metric_gNegCtrlAveBGSubSig_IsInRange	Metric_gNegCtrlSDevBGSubSig	Metric_gNegCtrlSDevBGSubSig_IsInRange	Metric_gSpatialDetrendRMSFilteredMinusFit	Metric_gSpatialDetrendRMSFilteredMinusFit_IsInRange	Metric_gNonCntrlMedCVProcSignal	Metric_gNonCntrlMedCVProcSignal_IsInRange	Metric_gE1aMedCVProcSignal	Metric_gE1aMedCVProcSignal_IsInRange	Metric_absGE1E1aSlope	Metric_absGE1E1aSlope_IsInRange	Metric_DetectionLimit	Metric_DetectionLimit_IsInRange	Metric_gDDN	Metric_gDDN_IsInRange
DATA	7.53866	7.53866	1.70843	0	778111	1.21952	2.02399	0.602532	0	39.2505	46.7892	4.64184	43102	46.7892	4.64184	43102	10	648	76	1151	7.53866	4375.74	11893.5	43596	0.0225968	0.171736	1.46427	2.60089	0.0233225	3506	2531	2.3917	6.88857	1.00213	4.40399	100.504	0	62131.2	455.874	81.6152	8.41318	0	243.105	98.1499	75.0863	-1	1.2281	139	75.4299	4.29204	-17.1908	4.40634	0.803295	1.17065	0.114053	5304	6.88857	44254	4.38262	7.61856	1.61521	1.02506	41310	0	0.123529	0.0686365	1.00096	(+)E1A_r60_3	0	0	0	0	0	0	0	0	0	0	-1	362.916	5.39047	3.56398	-1	1603.79	249.911	130.821	87.1678	1.95406	2.46566	0	1	10	30367	3156.37	1	ExtractionEvaluate	33220	20 Bit	0	354	976.824	0	0	25.7881	1	1	0.0225968	1	75.4299	0	-17.1908	0	4.40634	1	6.88857	1	3.56398	1	-1	0	0	0	-1	0	0	1
*
TYPE	integer	integer	integer	integer	integer	text	text	float	float	float	float	float	float	float	boolean	boolean	boolean	boolean	boolean	boolean	float	boolean	boolean	float	float
FEATURES	FeatureNum	Row	Col	SubTypeMask	ControlType	ProbeName	SystematicName	PositionX	PositionY	gProcessedSignal	gProcessedSigError	gMedianSignal	gBGMedianSignal	gBGPixSDev	gIsSaturated	gIsFeatNonUnifOL	gIsBGNonUnifOL	gIsFeatPopnOL	gIsBGPopnOL	IsManualFlag	gBGSubSignal	gIsPosAndSignif	gIsWellAboveBG	SpotExtentX	gBGMeanSignal
DATA	1	1	1	260	1	GE_BrightCorner	GE_BrightCorner	3588.65	181.093	4.085387e+004	4.085394e+003	35774	46	1.033097e+001	0	0	0	0	0	0	36066.8	1	1	52.9257	47.4027
DATA	2	1	2	66	1	DarkCorner	DarkCorner	3613.5	181	7.768496e+000	7.733034e+000	99	46.5	1.026994e+001	0	0	0	1	0	0	-4.7388	0	0	54.1152	47.2028
DATA	3	1	3	66	1	DarkCorner	DarkCorner	3640.11	181.12	7.697829e+000	7.662689e+000	90	47	1.036959e+001	0	0	0	0	0	0	-11.2818	0	0	47.5395	47.5308
DATA	4	1	4	66	1	DarkCorner	DarkCorner	3664.43	181.627	7.636892e+000	7.602031e+000	89.5	48	1.015294e+001	0	0	0	0	0	0	-13.8334	0	0	47.8731	48.6
DATA	5	1	5	66	1	DarkCorner	DarkCorner	3689.5	181	7.579619e+000	7.545019e+000	88.5	47	9.401386e+000	0	0	0	0	0	0	-13.4834	0	0	54.1152	47.4055
DATA	6	1	6	66	1	DarkCorner	DarkCorner	3715.64	181.431	7.522734e+000	7.488394e+000	87.5	46	9.594487e+000	0	0	0	0	0	0	-17.0488	0	0	42.2201	46.9644
DATA	7	1	7	66	1	DarkCorner	DarkCorner	3740.5	181	7.473522e+000	7.439406e+000	84.5	46	1.054518e+001	0	0	0	0	0	0	-19.7108	0	0	54.1152	46.8412
DATA	8	1	8	66	1	DarkCorner	DarkCorner	3766.28	181.58	7.425127e+000	7.391232e+000	84.5	45	1.071682e+001	0	0	0	0	0	0	-18.3982	0	0	52.0157	46.0927
DATA	9	1	9	66	1	DarkCorner	DarkCorner	3791.55	181.563	7.382085e+000	7.348386e+000	86.5	45	9.754357e+000	0	0	0	0	0	0	-15.9515	0	0	45.1352	45.8713
DATA	10	1	10	66	1	DarkCorner	DarkCorner	3817.37	181.507	7.341786e+000	7.308271e+000	82.5	46	9.924339e+000	0	0	0	0	0	0	-18.6306	0	0	47.8731	46.3082
DATA	11	1	11	66	1	DarkCorner	DarkCorner	3842.73	181	7.306146e+000	7.272794e+000	79	46	9.965808e+000	0	0	0	0	0	0	-20.0555	0	0	42.2201	46.0546
DATA	12	1	12	0	0	A_64_P076162	A_64_P076162	3868.41	181.219	3.115199e+001	7.881309e+000	133	46	9.599273e+000	0	0	0	0	0	0	29.6418	1	0	48.5334	46.408
DATA	13	1	13	0	0	A_64_P002176	NM_001170551	3893.32	181.605	4.026518e+002	4.090565e+001	490	46.5	1.055043e+001	0	0	0	0	0	0	384.687	1	1	49.5074	46.9504
DATA	14	1	14	0	0	A_42_P664913	NM_001108400	3918.75	181.716	1.129478e+003	1.131760e+002	1171	43	1.044800e+001	0	0	0	0	0	0	1083.06	1	1	51.0895	45.282
DATA	15	1	15	0	0	A_43_P13320	NM_138880	3943.58	181.427	7.194148e+000	7.161307e+000	103	45	1.020900e+001	0	0	0	0	0	0	-0.270591	0	0	57.5363	46.0388
DATA	16	1	16	0	0	A_64_P126523	A_64_P126523	3969.51	181.649	1.279468e+001	7.254111e+000	116	47	1.115561e+001	0	0	0	0	0	0	12.3435	1	0	49.8279	48.1513
DATA	17	1	17	0	0	A_64_P038045	XM_002730109	3994.66	181.191	5.068259e+001	8.742580e+000	150	49	1.205265e+001	0	0	0	0	0	0	49.0105	1	1	46.5243	49.7207
DATA	18	1	18	0	0	A_43_P11804	NM_017066	4020.44	181.519	2.060856e+004	2.060868e+003	19792	48	1.142230e+001	0	0	0	0	0	0	19970.9	1	1	49.8279	49.2987
DATA	19	1	19	0	0	A_44_P808710	XM_001069205	4045.42	181.427	3.862376e+001	8.079945e+000	135	47	1.027965e+001	0	0	0	0	0	0	37.4894	1	1	57.5363	47.9534
DATA	20	1	20	0	0	A_64_P142111	NM_001100887	4070.58	181.427	8.099087e+002	8.130043e+001	902	47	1.048041e+001	0	0	0	0	0	0	787.127	1	1	57.5363	47.5525
DATA	21	1	21	0	0	A_64_P095642	A_64_P095642	4096.43	181.671	1.435127e+002	1.600316e+001	239.5	45	9.992216e+000	0	0	0	0	0	0	139.611	1	1	49.5074	46.5961
DATA	22	1	22	0	0	A_42_P735279	NM_001004446	4121.42	181.427	3.242360e+004	3.242368e+003	30976	47	1.030374e+001	0	0	0	0	0	0	31558.6	1	1	57.5363	47.4648
DATA	23	1	23	0	0	A_44_P902822	XM_001063709	4146.58	181.427	2.157917e+001	7.397600e+000	120	46	9.600981e+000	0	0	0	0	0	0	21.008	1	0	57.5363	46.9118
DATA	24	1	24	0	0	A_42_P563843	NM_022263	4172.42	181.427	7.109226e+000	7.076773e+000	97	47	9.950072e+000	0	0	0	0	0	0	-6.12184	0	0	57.5363	46.7309
DATA	25	1	25	0	0	A_42_P610788	NM_031544	4197.93	181.732	1.126651e+004	1.126673e+003	10720	46	1.064024e+001	0	0	0	0	0	0	10962.2	1	1	47.5395	46.497
DATA	26	1	26	0	0	A_44_P242429	NM_001134842	4223.12	181.603	4.337252e+003	4.337830e+002	4233.5	48	1.080057e+001	0	0	0	0	0	0	4216.74	1	1	48.5334	48.5775
DATA	27	1	27	0	0	A_64_P020571	NM_001031659	4248.5	181.5	4.094269e+002	4.155260e+001	487	47	1.091249e+001	0	0	0	0	0	0	397.61	1	1	49.1849	48.3834
DATA	28	1	28	0	0	A_42_P518462	NM_001007020	4274.26	181.778	9.935950e+003	9.936204e+002	9561	48	1.050054e+001	0	0	0	0	0	0	9635.74	1	1	47.5395	48.5367
DATA	29	1	29	0	0	A_42_P469751	XM_001054007	4299.48	181.853	2.018847e+003	2.020101e+002	2022	49	1.133578e+001	0	0	0	0	0	0	1954.56	1	1	49.8279	49.7627
DATA	30	1	30	0	0	A_44_P209459	NM_022387	4324.84	182.179	9.973621e+003	9.973876e+002	9487.5	53	1.578419e+001	0	0	0	0	0	0	9637.24	1	1	46.1809	55.4038
DATA	31	1	31	0	0	A_64_P018547	NM_001108717	4350	181.455	1.050779e+003	1.053205e+002	1080.5	55	1.733337e+001	0	0	0	0	0	0	1012.98	1	1	55.8519	57.9568
DATA	32	1	32	0	0	A_64_P111513	A_64_P111513	4375.68	181.831	1.173826e+001	7.259144e+000	109.5	50	1.106510e+001	0	0	0	0	0	0	11.2876	1	0	49.5074	50.602
DATA	33	1	33	0	0	A_42_P493925	NM_198785	4401.03	181.753	6.914422e+002	6.951639e+001	753	49	1.109750e+001	0	0	0	0	0	0	663.04	1	1	47.5395	49.8745
DATA	34	1	34	0	0	A_64_P049828	NM_012543	4426.74	181.547	1.614480e+003	1.616088e+002	1650	49	1.167658e+001	0	0	0	0	0	0	1543.37	1	1	52.0157	50.5796
DATA	35	1	35	0	0	A_64_P137927	NM_001191885	4451.5	181.5	1.983404e+002	2.111039e+001	289	51	1.230809e+001	0	0	0	0	0	0	188.999	1	1	57.5363	52.498
DATA	36	1	36	0	0	A_43_P19848	NM_001106018	4476.89	181.5	6.003243e+001	9.416211e+000	160	55	1.264076e+001	0	0	0	0	0	0	57.0052	1	1	56.9804	56.3376
DATA	37	1	37	0	0	A_44_P308673	NM_139108	4502.5	181.5	2.703116e+002	2.799474e+001	355	51	1.190978e+001	0	0	0	0	0	0	255.72	1	1	57.5363	52.1713
DATA	38	1	38	0	0	A_64_P004269	NM_001191660	4528.3	181.9	2.433849e+003	2.434947e+002	2320.5	52	1.242943e+001	0	0	0	0	0	0	2293.42	1	1	47.2035	53.1855
DATA	39	1	39	0	0	A_42_P543670	NM_012572	4553.44	181.973	2.357124e+002	2.468769e+001	315.5	52	1.334959e+001	0	0	0	0	0	0	221.209	1	1	48.5334	53.9006
DATA	40	1	40	0	0	A_64_P164696	TC605704	4578.62	181.151	7.406197e+000	7.372388e+000	96.5	53	1.308069e+001	0	0	0	0	0	0	-2.12825	0	0	48.5334	54.3896
DATA	41	1	41	0	0	A_64_P055763	NM_001191822	4604.13	181.757	1.192452e+004	1.192474e+003	11126	51	1.173375e+001	0	0	0	0	0	0	11092.8	1	1	46.5243	52.0828
DATA	42	1	42	0	0	A_64_P068622	NM_001013056	4629.45	182.101	1.704002e+003	1.705625e+002	1639	51	1.257586e+001	0	0	0	0	0	0	1577.89	1	1	47.5395	52.501
DATA	43	1	43	0	0	A_44_P915877	XM_001065403	4655.34	181.878	2.793922e+002	2.892211e+001	361	52	1.238405e+001	0	0	0	0	0	0	257.444	1	1	48.8603	52.9735
DATA	44	1	44	0	0	A_42_P647599	NM_024129	4680.67	181.753	6.781863e+002	6.823350e+001	698	52	1.302209e+001	0	0	0	0	0	0	621.825	1	1	48.2044	53.3114
DATA	45	1	45	0	0	A_42_P798776	XM_002725203	4705.73	181.863	5.638682e+003	5.639187e+002	5159.5	51.5	1.163852e+001	0	0	0	0	0	0	5144.34	1	1	48.2044	52.2181
DATA	46	1	46	0	0	A_42_P781735	NM_053319	4731.81	181.795	9.565477e+004	9.565480e+003	87429	52	1.223157e+001	0	0	0	0	0	0	86803.6	1	1	51.4001	53.2637
DATA	47	1	47	0	0	A_42_P553611	TC630296	4756.6	181.853	6.522094e+003	6.522540e+002	5820	54	1.271990e+001	0	0	0	0	0	0	5888.08	1	1	48.8603	54.6047
DATA	48	1	48	0	0	A_43_P12729	NM_032615	4782.09	182.328	6.846414e+003	6.846844e+002	6079.5	54	1.254018e+001	0	0	0	0	0	0	6147.9	1	1	45.1352	54.8406
DATA	49	1	49	0	0	A_42_P507072	FQ213070	4807.54	181.701	5.575204e+003	5.575738e+002	4907	52	1.269535e+001	0	0	0	0	0	0	4978.51	1	1	52.0157	53.5451
DATA	50	1	50	0	0	A_42_P645467	NM_001108804	4832.97	181.873	9.446303e+001	1.222310e+001	180	50	1.287672e+001	0	0	0	0	0	0	83.8871	1	1	46.8651	51.6693
DATA	51	1	51	0	0	A_42_P738431	NM_019175	4858.28	182.095	3.323877e+003	3.324793e+002	2962.5	48	1.089201e+001	0	0	0	0	0	0	2935.36	1	1	48.8603	48.8765
DATA	52	1	52	0	0	A_42_P712297	NM_001135583	4883.5	181.944	7.675544e+003	7.675945e+002	6625	48	1.177306e+001	0	0	0	0	0	0	6740.21	1	1	48.5334	49.9515
DATA	53	1	53	0	0	A_42_P657538	NM_001008362	4908.88	182.044	4.976942e+003	4.977567e+002	4233	50	1.140576e+001	0	0	0	0	0	0	4345.69	1	1	46.8651	50.1856
DATA	54	1	54	0	0	A_42_P515405	NM_212505	4934.5	182.257	2.979877e+002	3.083708e+001	365.5	48	1.058287e+001	0	0	0	0	0	0	258.702	1	1	47.2035	48.7237
DATA	55	1	55	0	0	A_64_P089886	NM_053476	4959.5	182.273	5.635650e+003	5.636215e+002	4722	47	1.058538e+001	0	0	0	0	0	0	4865.12	1	1	46.5243	47.8241
DATA	56	1	56	0	0	A_42_P528580	NM_001107528	4985.17	182.338	8.962909e+003	8.963269e+002	7565	47	1.153028e+001	0	0	0	0	0	0	7692.81	1	1	45.4864	48.1865
DATA	57	1	57	0	0	A_43_P14285	NM_001034145	5010.54	181.882	1.310422e+004	1.310447e+003	11196.5	48	1.085993e+001	0	0	0	0	0	0	11182.3	1	1	49.8279	48.5783
DATA	58	1	58	0	0	A_42_P616287	NM_001134555	5036.1	182	2.509453e+002	2.637518e+001	318.5	48	1.068355e+001	0	0	0	0	0	0	212.92	1	1	46.8651	48.4088
DATA	59	1	59	0	0	A_42_P496411	NM_001109410	5061.6	181.831	6.971506e+003	6.971984e+002	5923.5	48	1.045147e+001	0	0	0	1	0	0	5881.43	1	1	51.4001	48.9128
DATA	60	1	60	0	0	A_44_P494310	NM_001009604	5086.73	182.379	6.855145e+003	6.855637e+002	5612	49	1.096178e+001	0	0	0	0	0	0	5751.8	1	1	46.1809	50.0139
DATA	61	1	61	0	0	A_42_P645142	NM_019375	5112.31	182.343	5.445909e+002	5.508134e+001	559.5	49	1.083545e+001	0	0	0	0	0	0	454.391	1	1	47.2035	49.1516
DATA	62	1	62	0	0	A_64_P042132	AABR03024196	5137.67	182.356	1.492523e+004	1.492547e+003	12673	49	1.048394e+001	0	0	0	0	0	0	12385.4	1	1	47.5395	50.0181
DATA	63	1	63	0	0	A_42_P508085	NM_001009620	5162.7	182.217	3.446364e+003	3.447375e+002	2812	48	1.068786e+001	0	0	0	0	0	0	2844.73	1	1	46.8651	49.492
DATA	64	1	64	0	0	A_64_P051159	NM_001100684	5188.6	182.347	1.686807e+003	1.688893e+002	1503.5	47	1.025261e+001	0	0	0	0	0	0	1384.91	1	1	47.5395	46.8926
DATA	65	1	65	0	0	A_64_P124041	ENSRNOT00000019667	5213.76	182.303	1.464896e+002	1.690299e+001	223	48	1.023989e+001	0	0	0	0	0	0	119.658	1	1	45.4864	48.3772
DATA	66	1	66	0	0	A_64_P131122	XR_086302	5239.16	182.224	1.067928e+002	1.363399e+001	189.5	47.5	1.065160e+001	0	0	0	0	0	0	86.7944	1	1	46.1809	48.3227
DATA	67	1	67	0	0	A_64_P021601	NM_031737	5264.59	181.831	1.165260e+002	1.443387e+001	194	49	1.112506e+001	0	0	0	0	0	0	94.2371	1	1	47.5395	49.4184
DATA	68	1	68	0	0	A_44_P776423	NM_001017386	5289.84	182.103	1.659635e+004	1.659657e+003	13012	49	1.072892e+001	0	0	0	0	0	0	13359.8	1	1	46.5243	48.4165
DATA	69	1	69	0	0	A_64_P120445	NM_080694	5315	182	4.149516e+001	9.545295e+000	134	50	1.186752e+001	0	0	0	0	0	0	33.2523	1	0	65	49.6282
DATA	70	1	70	0	0	A_42_P772878	NM_001011936	5340.65	182.12	6.101626e+003	6.102237e+002	4697	48	1.241906e+001	0	0	0	0	0	0	4868.22	1	1	48.8603	49.9547
DATA	71	1	71	0	0	A_42_P736315	NM_001108321	5366.21	182.194	3.685320e+003	3.686339e+002	2891	49	1.228894e+001	0	0	0	0	0	0	2928.15	1	1	47.5395	49.9416
DATA	73	1	73	0	0	A_64_P041004	NM_001108599	5416.85	181.903	2.646141e+004	2.646156e+003	20654.5	48	1.150458e+001	0	0	0	0	0	0	20864.2	1	1	46.8651	49.3921
DATA	74	1	74	0	0	A_42_P494276	NM_001109663	5442.25	182	8.896369e+002	8.939458e+001	762	47	1.025876e+001	0	0	0	0	0	0	699.052	1	1	49.1849	47.5797
DATA	75	1	75	66	1	DarkCorner	DarkCorner	5467.74	182.276	8.834608e+000	8.810284e+000	103.5	48	1.069184e+001	0	0	0	1	0	0	4.15788	0	0	48.5334	48.5549
DATA	76	1	76	66	1	DarkCorner	DarkCorner	5493.52	182.033	8.861217e+000	8.820766e+000	96	48	1.072231e+001	0	0	0	1	0	0	-0.944321	0	0	43.7019	48.496
DATA	77	1	77	66	1	DarkCorner	DarkCorner	5518.5	182	8.884166e+000	8.843610e+000	95	48	1.064545e+001	0	0	0	0	0	0	-3.49706	0	0	54.1152	48.044
DATA	78	1	78	66	1	DarkCorner	DarkCorner	5544.59	182.203	8.904964e+000	8.864314e+000	90	46	1.051681e+001	0	0	0	0	0	0	-5.11712	0	0	45.1352	47.1969
DATA	79	1	79	66	1	DarkCorner	DarkCorner	5569	182	8.922424e+000	8.881694e+000	86.5	48	1.086458e+001	0	0	0	0	0	0	-13.2574	0	0	54.9904	47.9553
DATA	80	1	80	66	1	DarkCorner	DarkCorner	5595.64	182.258	8.937482e+000	8.896683e+000	95	47	1.032894e+001	0	0	0	0	0	0	-4.30639	0	0	46.1809	47.1676
DATA	81	1	81	66	1	DarkCorner	DarkCorner	5620.15	182.125	8.948963e+000	8.908111e+000	87	47	1.015134e+001	0	0	0	0	0	0	-9.89106	0	0	46.8651	46.854
DATA	82	1	82	66	1	DarkCorner	DarkCorner	5645.39	182.069	8.957443e+000	8.916553e+000	93	46	9.605557e+000	0	0	0	0	0	0	-5.03299	0	0	53.8203	45.5848
DATA	83	1	83	66	1	DarkCorner	DarkCorner	5670.5	182	8.962540e+000	8.921627e+000	96	45	1.022920e+001	0	0	0	0	0	0	-4.84372	0	0	54.1152	45.7405
DATA	84	1	84	260	1	GE_BrightCorner	GE_BrightCorner	5696.69	182.023	4.360096e+004	4.360105e+003	32816	46	1.120401e+001	0	0	0	0	0	0	33659.9	1	1	50.7771	46.6077
DATA	85	1	85	260	1	GE_BrightCorner	GE_BrightCorner	5721.93	182.402	4.332593e+004	4.332602e+003	32920.5	45	1.093859e+001	0	0	0	0	0	0	33458.8	1	1	51.0895	46.167
DATA	86	2	1	260	1	GE_BrightCorner	GE_BrightCorner	3601.34	188.878	4.168364e+004	4.168372e+003	36674	47	1.019483e+001	0	0	0	0	0	0	37025.5	1	1	48.8603	48.2551
DATA	87	2	2	66	1	DarkCorner	DarkCorner	3626.33	188.5	7.723317e+000	7.688061e+000	87	49	1.175109e+001	0	0	0	0	0	0	-16.3741	0	0	57.5363	50.6512
DATA	88	2	3	66	1	DarkCorner	DarkCorner	3651.58	188.427	7.659027e+000	7.624064e+000	86	48	1.070570e+001	0	0	0	0	0	0	-15.1704	0	0	57.5363	48.8916
DATA	89	2	4	66	1	DarkCorner	DarkCorner	3677.18	189.119	7.597130e+000	7.562450e+000	82	49	9.302250e+000	0	0	0	0	0	0	-19.9178	0	0	46.1809	50.4103
DATA	90	2	5	66	1	DarkCorner	DarkCorner	3702.5	188.5	7.541697e+000	7.507270e+000	84.5	46	9.716805e+000	0	0	0	0	0	0	-16.3413	0	0	57.5363	47.3744
DATA	91	2	6	66	1	DarkCorner	DarkCorner	3726.52	189.136	7.491229e+000	7.457033e+000	83.5	48	1.022304e+001	0	0	0	0	0	0	-20.4429	0	0	37.4241	48.3467
DATA	92	2	7	66	1	DarkCorner	DarkCorner	3754.3	188.985	7.438244e+000	7.404289e+000	89	46	1.029502e+001	0	0	0	0	0	0	-14.4019	0	0	45.4864	47.0888
DATA	93	2	8	66	1	DarkCorner	DarkCorner	3779.31	188.641	7.394580e+000	7.360824e+000	82	46	1.026011e+001	0	0	0	0	0	0	-20.6342	0	0	50.4627	46.9159
DATA	94	2	9	66	1	DarkCorner	DarkCorner	3803.89	188.5	7.354817e+000	7.321243e+000	83	46	9.596163e+000	0	0	0	0	0	0	-16.4726	0	0	56.9804	46.6364
DATA	95	2	10	66	1	DarkCorner	DarkCorner	3830.89	188.688	7.314558e+000	7.281167e+000	84	47	1.072634e+001	0	0	0	0	0	0	-15.2856	0	0	45.1352	47.1457
DATA	96	2	11	0	0	A_44_P212746	ENSRNOT00000049707	3855.06	188.754	7.281880e+000	7.268732e+000	108	47	9.506289e+000	0	0	0	0	0	0	5.13274	0	0	45.835	46.7299
DATA	97	2	12	0	0	A_64_P103615	NM_001107179	3880.58	188.986	1.068498e+002	1.289415e+001	203	47	9.836651e+000	0	0	0	0	0	0	101.982	1	1	48.5334	47.2526
DATA	98	2	13	0	0	A_44_P550697	NM_001106400	3905.5	188.5	3.637077e+002	3.707476e+001	442	45	1.118780e+001	0	0	0	0	0	0	348.43	1	1	57.5363	46.2358
DATA	99	2	14	0	0	A_64_P045429	A_64_P045429	3930.89	188.5	5.685952e+001	9.147724e+000	157	45	1.086284e+001	0	0	0	0	0	0	54.6586	1	1	56.9804	46.7972
DATA	100	2	15	0	0	A_64_P075175	ENSRNOT00000044322	3956.71	189.145	1.511693e+002	1.671973e+001	252.5	46	1.157247e+001	0	0	0	0	0	0	145.777	1	1	46.5243	47.3415
DATA	101	2	16	0	0	A_44_P472801	NM_173121	3981.87	189.368	3.196586e+003	3.197380e+002	2998	50	1.095121e+001	0	0	0	0	0	0	3090.66	1	1	46.1809	49.8889
DATA	102	2	17	0	0	A_42_P491486	NM_022533	4007.27	188.863	7.174990e+003	7.175343e+002	6793.5	51	1.273374e+001	0	0	0	0	0	0	6952.28	1	1	48.2044	52.0359
DATA	103	2	18	0	0	A_43_P12736	NM_033299	4032.5	188.5	1.013764e+002	1.237468e+001	199	48	9.541590e+000	0	0	0	0	0	0	98.4052	1	1	65	48.3854
DATA	104	2	19	0	0	A_64_P158790	A_64_P158790	4058	188.545	4.626402e+004	4.626407e+003	44982	48	1.081127e+001	0	0	0	0	0	0	44974.5	1	1	55.8519	49.3941
DATA	105	2	20	0	0	A_44_P229481	NM_001191077	4083.84	188.882	2.144996e+002	2.258756e+001	313.5	45	9.591343e+000	0	0	0	0	0	0	208.761	1	1	46.5243	46.57
DATA	106	2	21	0	0	A_64_P133836	ENSRNOT00000039319	4108.58	188.573	7.105566e+000	7.073178e+000	100	47	1.052078e+001	0	0	0	0	0	0	0.255869	0	0	57.5363	47.7286
DATA	107	2	22	0	0	A_43_P13137	NM_130818	4134.33	188.5	1.856764e+001	7.310189e+000	120	48	1.036230e+001	0	0	0	0	0	0	18.09	1	0	65	47.8373
DATA	108	2	23	0	0	A_42_P586141	NM_017035	4159.73	189.4	3.083594e+002	3.163593e+001	403	45	8.875674e+000	0	0	0	0	0	0	300.469	1	1	46.5243	45.715
DATA	109	2	24	0	0	A_44_P142850	NM_001106975	4185	188.545	5.982017e+001	9.262914e+000	158	46	1.034114e+001	0	0	0	0	0	0	58.2663	1	1	55.8519	46.1553
DATA	110	2	25	0	0	A_44_P1042504	NM_001044232	4210.42	188.573	2.294861e+002	2.401496e+001	331	45	9.388452e+000	0	0	0	0	0	0	223.386	1	1	57.5363	45.8815
DATA	111	2	26	0	0	A_42_P476474	NM_001033926	4236.09	189.328	5.316749e+003	5.317221e+002	5179.5	47	1.055513e+001	0	0	0	0	0	0	5170.93	1	1	45.1352	47.602
DATA	112	2	27	0	0	A_44_P480882	ENSRNOT00000035496	4261.19	188.57	7.124753e+000	7.092229e+000	96	46	1.000363e+001	0	0	0	0	0	0	-5.90108	0	0	65	47.0783
DATA	113	2	28	0	0	A_44_P1042696	NM_001106377	4286.63	189	7.056260e+003	7.056618e+002	6773	47	1.078641e+001	0	0	0	0	0	0	6843.33	1	1	48.5334	47.9278
DATA	114	2	29	0	0	A_64_P132576	NM_001012357	4311.91	188.614	2.271285e+002	2.380156e+001	320.5	49	1.163067e+001	0	0	0	0	0	0	219.861	1	1	57.259	50.6075
DATA	115	2	30	0	0	A_42_P652357	NM_021868	4337.42	188.573	4.009356e+004	4.009362e+003	37733	62	2.254986e+001	0	0	0	0	1	0	38727.9	1	1	57.5363	68.6786
DATA	116	2	31	0	0	A_64_P134935	NM_001107976	4362.58	188.573	7.181181e+000	7.148399e+000	99	51	1.178819e+001	0	0	0	0	0	0	-1.97161	0	0	57.5363	51.7926
DATA	117	2	32	0	0	A_64_P034019	NM_001107145	4388.09	188.614	2.243039e+001	7.510221e+000	123	50	1.064535e+001	0	0	0	0	0	0	21.5577	1	0	57.259	51.0489
DATA	118	2	33	0	0	A_64_P140634	A_64_P140634	4413.94	189.175	3.081480e+003	3.082318e+002	3071	50	1.273892e+001	0	0	0	0	0	0	2953.03	1	1	45.4864	51.4831
DATA	120	2	35	0	0	A_42_P746029	NM_144748	4464.42	188.573	1.477906e+001	7.384938e+000	115	56	1.350014e+001	0	0	0	0	0	0	14.0703	1	0	65	56.9637
DATA	121	2	36	0	0	A_64_P009032	NM_001105801	4489.5	188.648	4.301690e+004	4.301696e+003	40456.5	54	1.197643e+001	0	0	0	0	0	0	40809	1	1	57.5363	55.7031
DATA	122	2	37	0	0	A_42_P764792	NM_001014036	4515.76	189.306	4.607517e+002	4.664822e+001	530	54	1.260912e+001	0	0	0	0	0	0	435.418	1	1	47.2035	53.6526
DATA	123	2	38	0	0	A_64_P029278	NM_001108687	4540.58	189.239	3.020142e+002	3.107540e+001	383.5	52	1.153461e+001	0	0	0	0	0	0	284.288	1	1	47.5395	53.7665
DATA	124	2	39	0	0	A_43_P12266	NM_022622	4566.26	189.203	5.551052e+001	9.210121e+000	153.5	52	1.254668e+001	0	0	0	0	0	0	52.0306	1	1	46.8651	53.1731
DATA	125	2	40	0	0	A_44_P204710	ENSRNOT00000049315	4592.08	189.233	8.215024e+000	7.427690e+000	107	51	1.215034e+001	0	0	0	0	0	0	7.66578	1	0	44.7812	52.8028
DATA	126	2	41	0	0	A_64_P163837	NM_001013149	4616.5	189	1.331631e+002	1.524147e+001	228.5	49	1.150262e+001	0	0	0	0	0	0	123.713	1	1	54.1152	50.4902
DATA	127	2	42	0	0	A_64_P016202	XM_001080153	4642	189	7.484046e+000	7.449882e+000	89.5	52	1.099588e+001	0	0	0	0	0	0	-10.303	0	0	54.9904	52.3443
DATA	128	2	43	0	0	A_64_P137168	NM_053912	4667.37	189.108	1.219581e+004	1.219604e+003	11063	52	1.548165e+001	0	0	0	0	0	0	11222.5	1	1	45.1352	55.1152
DATA	129	2	44	0	0	A_42_P830598	XM_001063895	4693.43	189.239	1.306536e+003	1.308701e+002	1247	52	1.217654e+001	0	0	0	0	0	0	1196.14	1	1	46.5243	53.1238
DATA	130	2	45	0	0	A_42_P525886	NM_001105716	4718.5	188.931	1.176719e+002	1.398794e+001	207	53	1.188702e+001	0	0	0	0	0	0	107.182	1	1	48.5334	53.6233
DATA	131	2	46	0	0	A_42_P836392	NM_134383	4743.5	189	1.259456e+004	1.259479e+003	11310	55	1.379979e+001	0	0	0	0	0	0	11412.9	1	1	54.1152	56.2463
DATA	132	2	47	0	0	A_44_P146783	NM_001001366	4769	189	4.219764e+001	8.730148e+000	139.5	54	1.188881e+001	0	0	0	0	0	0	38.0344	1	1	65	54.4977
DATA	133	2	48	0	0	A_44_P294675	NM_053687	4794.5	189	1.082408e+002	1.327440e+001	196	54.5	1.239525e+001	0	0	0	0	0	0	97.0319	1	1	54.1152	54.8598
DATA	134	2	49	0	0	A_64_P047137	NM_001001283	4819.5	189	7.761492e+000	7.726061e+000	100.5	51	1.315083e+001	0	0	0	0	0	0	-0.0288166	0	0	65	53.4067
DATA	135	2	50	0	0	A_44_P170396	NM_017267	4845.66	189	1.263119e+001	7.872513e+000	114	49	1.116962e+001	0	0	0	0	0	0	11.1975	1	0	45.4864	49.2941
DATA	136	2	51	0	0	A_64_P077603	ENSRNOT00000037503	4870.5	189	1.358558e+002	1.567217e+001	220	48	1.133479e+001	0	0	0	0	0	0	119.775	1	1	54.1152	48.7847
DATA	137	2	52	0	0	A_42_P648800	AA998304	4896	189	4.662768e+002	4.728518e+001	510	50	1.223620e+001	0	0	0	0	0	0	408.754	1	1	54.9904	50.9476
DATA	138	2	53	0	0	A_64_P143186	A_64_P143186	4921.5	189	6.819296e+001	1.043846e+001	157	49	1.106253e+001	0	0	0	0	0	0	59.4391	1	1	54.1152	48.6376
DATA	139	2	54	0	0	A_42_P622681	NM_001030020	4946.99	189.324	4.566391e+003	4.567083e+002	3877	50	1.003722e+001	0	0	0	1	0	0	3957.64	1	1	46.1809	50.3568
DATA	140	2	55	0	0	A_42_P506076	NM_019253	4972.57	189.338	3.236507e+004	3.236517e+003	27188	48	1.207265e+001	0	0	0	0	0	0	27889.3	1	1	47.8731	48.9659
DATA	141	2	56	0	0	A_64_P158975	NM_001109536	4997.5	189	1.576389e+002	1.769559e+001	237	50	1.209892e+001	0	0	0	0	0	0	135.071	1	1	54.1152	50.35
DATA	142	2	57	0	0	A_42_P655425	NM_001106406	5022.91	189.386	1.062016e+003	1.065089e+002	1003	49	1.040164e+001	0	0	0	1	0	0	904.863	1	1	57.259	50.1463
DATA	143	2	58	0	0	A_44_P408520	NM_031569	5049.12	189.078	1.226910e+002	1.471980e+001	201	50	9.995200e+000	0	0	0	1	0	0	103.921	1	1	48.2044	49.75
DATA	144	2	59	0	0	A_64_P031259	NM_001002022	5073.58	189.427	1.256297e+002	1.498940e+001	208	49	1.073404e+001	0	0	0	0	0	0	105.842	1	1	57.5363	49.1435
DATA	145	2	60	0	0	A_43_P10227	NM_024397	5099.5	189.265	1.490297e+004	1.490320e+003	12203.5	51	1.157150e+001	0	0	0	0	0	0	12484.2	1	1	46.5243	51.378
DATA	146	2	61	0	0	A_42_P542744	NM_001107544	5124.8	189.465	6.941365e+003	6.941857e+002	5704.5	49	1.113328e+001	0	0	0	1	0	0	5783.25	1	1	47.5395	49.2714
DATA	147	2	62	0	0	A_64_P052387	A_64_P052387	5149.91	189.386	9.871469e+001	1.290515e+001	185	53	1.152486e+001	0	0	0	0	0	0	81.8053	1	1	57.259	53.9793
DATA	149	2	64	0	0	A_64_P064823	ENSRNOT00000050238	5200.58	189.427	3.438016e+002	3.539146e+001	376	49	1.110139e+001	0	0	0	0	0	0	281.941	1	1	57.5363	49.4734
DATA	150	2	65	0	0	A_42_P730292	NM_001004244	5226.57	189.392	2.665583e+003	2.666920e+002	2227	48	9.910426e+000	0	0	0	0	0	0	2174.63	1	1	49.1849	48.2277
DATA	151	2	66	0	0	A_64_P052878	FM104687	5251.5	189.352	4.070899e+002	4.158383e+001	429	49	1.198400e+001	0	0	0	0	0	0	330.503	1	1	57.5363	49.3744
DATA	152	2	67	0	0	A_64_P157171	XM_001063008	5277.32	189.459	1.805063e+003	1.807076e+002	1562.5	50	1.038601e+001	0	0	0	0	0	0	1458.4	1	1	51.7088	49.2692
DATA	153	2	68	0	0	A_44_P693350	ENSRNOT00000030985	5302.42	189.427	8.604321e+000	8.565043e+000	98	49.5	1.037818e+001	0	0	0	0	0	0	-3.10453	0	0	65	49.9307
DATA	154	2	69	0	0	A_64_P090168	NM_001000720	5328.13	189.842	3.327198e+001	9.223897e+000	127	51	1.392890e+001	0	0	0	0	0	0	26.6417	1	0	48.2044	52.5241
DATA	155	2	70	0	0	A_42_P726392	NM_001106353	5353.11	189.5	1.762408e+003	1.764524e+002	1409.5	51	1.331532e+001	0	0	0	0	0	0	1405.24	1	1	65	52.4593
DATA	156	2	71	0	0	A_64_P015727	FQ218047	5378.79	189.699	6.173606e+003	6.174215e+002	4909	49	1.175425e+001	0	0	0	0	0	0	4902.63	1	1	48.2044	50.5098
DATA	157	2	72	0	0	A_44_P897023	NM_001008364	5404.18	189.958	1.441493e+003	1.444121e+002	1237.5	50.5	1.214969e+001	0	0	0	0	0	0	1140.44	1	1	46.8651	50.932
DATA	158	2	73	0	0	A_44_P104776	NM_001001425	5429.42	189.427	6.382358e+001	1.082139e+001	150	50	1.117554e+001	0	0	0	0	0	0	50.31	1	1	57.5363	50.809
DATA	159	2	74	0	0	A_64_P142521	A_64_P142521	5454.58	189.427	1.857917e+001	8.962361e+000	116.5	47.5	1.060479e+001	0	0	0	0	0	0	14.5972	1	0	57.5363	48.2336
DATA	160	2	75	66	1	DarkCorner	DarkCorner	5480.11	189.5	8.834819e+000	8.799991e+000	101	49	1.188274e+001	0	0	0	1	0	0	2.43708	0	0	65	50.5556
DATA	161	2	76	66	1	DarkCorner	DarkCorner	5505.5	189.5	8.859321e+000	8.818879e+000	86.5	49	1.022570e+001	0	0	0	0	0	0	-12.2657	0	0	65	49.3206
DATA	162	2	77	66	1	DarkCorner	DarkCorner	5530.94	190.045	8.880320e+000	8.839782e+000	98	48	1.176563e+001	0	0	0	0	0	0	-3.48843	0	0	46.8651	49.33
DATA	163	2	78	66	1	DarkCorner	DarkCorner	5556.99	190.386	8.899363e+000	8.858738e+000	81.5	47	1.055552e+001	0	0	0	0	0	0	-15.8927	0	0	46.8651	47.9153
DATA	164	2	79	66	1	DarkCorner	DarkCorner	5580.9	190.048	8.915343e+000	8.874645e+000	82	48	1.118089e+001	0	0	0	0	0	0	-16.8866	0	0	36.5637	49.1567
DATA	165	2	80	66	1	DarkCorner	DarkCorner	5607.43	189.778	8.929733e+000	8.888969e+000	82	48	1.099489e+001	0	0	0	0	0	0	-16.3174	0	0	47.8731	48.0637
DATA	166	2	81	66	1	DarkCorner	DarkCorner	5632.5	189.5	8.940181e+000	8.899370e+000	88	47	9.368817e+000	0	0	0	0	0	0	-11.7424	0	0	57.5363	46.4834
DATA	167	2	82	66	1	DarkCorner	DarkCorner	5657.67	189.5	1.359091e+001	9.009159e+000	97.5	46	9.557326e+000	0	0	0	1	0	0	10.5122	1	0	65	45.685
DATA	168	2	83	66	1	DarkCorner	DarkCorner	5683.33	189.5	8.950219e+000	8.909362e+000	88	45	1.097368e+001	0	0	0	0	0	0	-7.89489	0	0	57.5363	46.6396
DATA	169	2	84	66	1	DarkCorner	DarkCorner	5708.5	189.5	8.949875e+000	8.909020e+000	88	46	1.124180e+001	0	0	0	0	0	0	-9.13797	0	0	57.5363	47.4541
DATA	170	2	85	260	1	GE_BrightCorner	GE_BrightCorner	5734.66	189.816	3.984484e+004	3.984494e+003	30786	45	1.067237e+001	0	0	0	0	0	0	30825.3	1	1	49.5074	46.0072
DATA	171	3	1	66	1	DarkCorner	DarkCorner	3588.42	195.573	7.817633e+000	7.781946e+000	96	45	9.264941e+000	0	0	0	0	0	0	-6.68413	0	0	57.5363	45.9742
DATA	172	3	2	66	1	DarkCorner	DarkCorner	3613.58	195.573	7.747343e+000	7.711977e+000	84	51.5	1.242658e+001	0	0	0	0	0	0	-20.4486	0	0	57.5363	53.0345
DATA	173	3	3	66	1	DarkCorner	DarkCorner	3639	195.545	7.680804e+000	7.645741e+000	87	54	1.215944e+001	0	0	0	0	0	0	-16.256	0	0	55.8519	54.3623
DATA	174	3	4	66	1	DarkCorner	DarkCorner	3664.25	195.941	7.618398e+000	7.583621e+000	81	48	1.141485e+001	0	0	0	0	0	0	-23.4645	0	0	46.1809	49.9672
DATA	175	3	5	66	1	DarkCorner	DarkCorner	3689.58	195.573	7.560920e+000	7.526405e+000	87	47	1.199031e+001	0	0	0	0	0	0	-14.0074	0	0	57.5363	49.3509
DATA	176	3	6	66	1	DarkCorner	DarkCorner	3715.75	195.955	7.504775e+000	7.470516e+000	84	53	8.808733e+000	0	0	0	0	0	0	-20.4551	0	0	45.835	51.9483
DATA	177	3	7	66	1	DarkCorner	DarkCorner	3740.89	196.288	7.454773e+000	7.420743e+000	85	48	9.940669e+000	0	0	0	0	0	0	-21.1673	0	0	47.5395	50.3099
DATA	178	3	8	66	1	DarkCorner	DarkCorner	3766.06	196.167	7.408947e+000	7.375126e+000	77.5	49.5	9.950784e+000	0	0	0	0	0	0	-25.3052	0	0	45.835	48.9615
DATA	179	3	9	66	1	DarkCorner	DarkCorner	3792.1	195.879	7.365462e+000	7.331839e+000	82	49.5	1.026194e+001	0	0	0	0	0	0	-21.6873	0	0	43.7019	49.7885
DATA	180	3	10	66	1	DarkCorner	DarkCorner	3816.58	195.573	7.327993e+000	7.294541e+000	86	49	1.172272e+001	0	0	0	0	0	0	-17.6614	0	0	57.5363	49.7231
DATA	181	3	11	0	0	A_64_P269465	ENSRNOT00000055742	3842.09	195.614	2.868183e+001	7.804778e+000	127	50	1.000022e+001	0	0	0	0	0	0	27.2195	1	0	57.259	51.7903
DATA	182	3	12	0	0	A_64_P140776	NM_001114502	3867.77	196.359	7.710837e+003	7.711176e+002	7258	50	1.056157e+001	0	0	0	0	0	0	7351.57	1	1	44.7812	48.5636
DATA	183	3	13	0	0	A_42_P662683	NM_001108855	3893.2	196.352	1.845024e+004	1.845038e+003	17370	47.5	1.135437e+001	0	0	0	0	0	0	17661.8	1	1	46.8651	47.9091
DATA	184	3	14	0	0	A_44_P308687	NM_181389	3918.43	196.29	1.575502e+002	1.730994e+001	257	48.5	1.376088e+001	0	0	0	0	0	0	151.359	1	1	46.8651	52.5
DATA	185	3	15	0	0	A_42_P705255	NM_078622	3943.79	196.433	1.264540e+002	1.452548e+001	221	54	1.363728e+001	0	0	0	0	0	0	121.877	1	1	46.1809	54.2075
DATA	186	3	16	0	0	A_44_P142472	NM_001106072	3969.63	196.171	1.130686e+004	1.130709e+003	10675	49	9.147849e+000	0	0	0	0	0	0	10928.4	1	1	49.8279	48.2745
DATA	187	3	17	0	0	A_64_P015946	NM_001009720	3994.77	196.212	9.038375e+002	9.066299e+001	963	49	1.104187e+001	0	0	0	0	0	0	875.665	1	1	45.835	51.1552
DATA	188	3	18	0	0	A_64_P118698	ENSRNOT00000050943	4019.61	195.931	2.130530e+001	7.409316e+000	124	52	8.769078e+000	0	0	0	0	0	0	20.6814	1	0	53.8203	52.2623
DATA	189	3	19	0	0	A_42_P705302	NM_001107361	4045.3	196.1	8.967637e+003	8.967917e+002	8455.5	54	1.086439e+001	0	0	0	0	0	0	8719.67	1	1	47.2035	54.0816
DATA	190	3	20	0	0	A_64_P097547	NM_001100528	4070.5	196	3.230334e+001	7.778146e+000	132	54	1.004431e+001	0	0	0	0	0	0	31.4493	1	0	54.1152	52.6415
DATA	191	3	21	0	0	A_42_P815485	NM_001013908	4096.13	196.195	1.078741e+004	1.078764e+003	10402	49	1.102911e+001	0	0	0	0	0	0	10512.1	1	1	51.4001	48.54
DATA	192	3	22	0	0	A_42_P526728	ENSRNOT00000060758	4121.7	196.173	2.811812e+003	2.812700e+002	2750	53	1.201974e+001	0	0	0	0	0	0	2741.55	1	1	49.8279	53.5968
DATA	193	3	23	0	0	A_42_P692317	NM_001107565	4146.96	196.358	9.252544e+002	9.279467e+001	1013	47	8.559084e+000	0	0	0	0	0	0	902.331	1	1	45.835	47.7636
DATA	194	3	24	0	0	A_44_P383949	NM_175593	4172.57	196.309	2.281108e+001	7.423746e+000	127.5	49	1.084998e+001	0	0	0	0	0	0	22.2427	1	0	46.8651	50.8793
DATA	195	3	25	0	0	A_42_P589570	NM_001014105	4197.93	196.2	4.386936e+002	4.443509e+001	528.5	48	8.843246e+000	0	0	0	0	0	0	427.557	1	1	46.8651	49.1053
DATA	196	3	26	0	0	A_64_P012384	NM_001039338	4223	196	9.172726e+001	1.158342e+001	194.5	48	8.683674e+000	0	0	0	0	0	0	89.327	1	1	54.9904	46.7966
DATA	197	3	27	0	0	A_64_P088612	NM_053871	4248.5	196.265	6.383101e+003	6.383494e+002	5979	48.5	1.179479e+001	0	0	0	0	0	0	6209.41	1	1	46.5243	49.5741
DATA	198	3	28	0	0	A_42_P668072	NM_013130	4273.88	196.348	3.515048e+002	3.585861e+001	438	50	1.019474e+001	0	0	0	0	0	0	341.464	1	1	45.835	49.3265
DATA	199	3	29	0	0	A_44_P624451	NM_001134605	4299.46	196.557	1.044896e+002	1.263466e+001	202	50	1.056427e+001	0	0	0	0	0	0	101.334	1	1	46.1809	50.0204
DATA	200	3	30	0	0	A_64_P118502	A_64_P118502	4324.93	196.733	3.594923e+002	3.664696e+001	455	58	1.795342e+001	0	0	0	0	1	0	347.951	1	1	43.3362	61.2444
DATA	201	3	31	0	0	A_43_P15761	NM_031608	4350	196	1.254971e+002	1.443546e+001	222	57	1.949756e+001	0	0	0	0	1	0	121.188	1	1	54.9904	61.9375
DATA	202	3	32	0	0	A_42_P667696	NM_001191800	4375.67	196.377	1.786345e+003	1.787776e+002	1783	49	1.378634e+001	0	0	0	0	0	0	1720.69	1	1	46.8651	53.0667
DATA	203	3	33	0	0	A_44_P899121	NM_001079941	4401.09	196.104	6.155907e+003	6.156324e+002	5772	47.5	1.144062e+001	0	0	0	0	0	0	5913	1	1	46.8651	50.4688
DATA	204	3	34	0	0	A_42_P642757	NM_031235	4426.15	196.136	7.150401e+003	7.150763e+002	6759.5	48	8.519998e+000	0	0	0	0	0	0	6847.82	1	1	46.1809	48.3651
DATA	205	3	35	0	0	A_64_P066694	NM_001033898	4451.81	196.403	4.059858e+001	8.280047e+000	137	52	1.194470e+001	0	0	0	0	0	0	38.7541	1	1	46.5243	53.6066
DATA	206	3	36	0	0	A_42_P699201	TC594545	4476.91	196.386	2.870164e+001	7.789390e+000	128	53.5	1.201463e+001	0	0	0	0	0	0	27.3035	1	0	57.259	55.4524
DATA	207	3	37	0	0	A_42_P591944	NM_172093	4502.5	196.352	1.018039e+002	1.250879e+001	199	54	1.055073e+001	0	0	0	0	0	0	96.4841	1	1	57.5363	53.78
DATA	208	3	38	0	0	A_44_P115293	NM_001108294	4527.58	196.427	2.808337e+002	2.901573e+001	366	50	1.105226e+001	0	0	0	0	0	0	265.137	1	1	57.5363	52.0377
DATA	209	3	39	1028	1	(+)E1A_r60_a107	E1A_r60_a107	4553.42	196.427	7.360463e+000	7.354090e+000	104	54	1.189907e+001	0	0	0	0	0	0	5.94413	0	0	57.5363	56.4909
DATA	210	3	40	0	0	A_44_P194531	NM_001007742	4578.86	197.156	2.303672e+002	2.418318e+001	325.5	50	9.244054e+000	0	0	0	0	0	0	215.679	1	1	45.4864	49.6545
DATA	211	3	41	0	0	A_43_P20016	NM_001107377	4604.44	196.278	9.920071e+001	1.237110e+001	196	56	1.218855e+001	0	0	0	0	0	0	92.4491	1	1	48.5334	56.9464
DATA	212	3	42	0	0	A_64_P105550	A_64_P105550	4629.51	196.705	1.263816e+002	1.465789e+001	222.5	49	1.080785e+001	0	0	0	0	0	0	117.251	1	1	42.9674	49.6522
DATA	213	3	43	0	0	A_42_P791872	NM_001135174	4655.25	196.5	1.232152e+004	1.232175e+003	11197	55	1.156418e+001	0	0	0	0	0	0	11375.8	1	1	48.5334	54.0741
DATA	214	3	44	0	0	A_42_P499273	NM_001012148	4680.57	196.608	2.985798e+003	2.986740e+002	2769	60	1.404598e+001	0	0	0	0	1	0	2743.21	1	1	49.1849	60.4043
DATA	215	3	45	0	0	A_64_P021960	NM_001109493	4705.88	196.721	2.943440e+002	3.038366e+001	371	54	7.831754e+000	0	0	0	0	0	0	269.077	1	1	45.835	54.6
DATA	216	3	46	0	0	A_64_P083725	A_64_P083725	4731	196.455	1.189848e+005	1.189848e+004	108598	55	1.251153e+001	0	0	0	0	0	0	108213	1	1	55.8519	56
DATA	217	3	47	0	0	A_42_P524536	NM_012698	4756.42	196.427	3.753883e+002	3.830329e+001	432.5	49	1.440381e+001	0	0	0	0	0	0	339.608	1	1	57.5363	53.1964
DATA	218	3	48	0	0	A_64_P151675	NM_175755	4782.09	196.757	6.745093e+001	1.020300e+001	162	51	1.215042e+001	0	0	0	0	0	0	60.6945	1	1	48.2044	51.1667
DATA	219	3	49	0	0	A_64_P146914	A_64_P146914	4807.51	196.697	2.035410e+003	2.036865e+002	1862	53	1.405187e+001	0	0	0	0	0	0	1821.55	1	1	49.1849	53.4082
DATA	220	3	50	0	0	A_64_P115065	NM_001109631	4832.5	196.5	7.774965e+000	7.740136e+000	102	49.5	9.534568e+000	0	0	0	0	0	0	0.901355	0	0	57.5363	51.3846
DATA	221	3	51	0	0	A_42_P468771	NM_001107362	4858.29	196.767	6.223336e+003	6.223823e+002	5506.5	48	9.744792e+000	0	0	0	0	0	0	5508.03	1	1	48.5334	49.1951
DATA	222	3	52	0	0	A_44_P226461	NM_053798	4883.36	196.742	1.809646e+003	1.811338e+002	1644	49.5	1.027912e+001	0	0	0	0	0	0	1592.76	1	1	46.1809	51.7885
DATA	223	3	53	0	0	A_64_P009440	NM_001109313	4908.84	197.06	4.063371e+001	8.857789e+000	139	54	1.138049e+001	0	0	0	0	0	0	35.5629	1	1	46.5243	54.1404
DATA	224	3	54	0	0	A_44_P282433	NM_033230	4934.11	196.5	6.189709e+002	6.240124e+001	635	52	1.056820e+001	0	0	0	0	0	0	538.621	1	1	56.9804	51.8793
DATA	225	3	55	0	0	A_42_P461003	NM_001044283	4959.61	197.087	1.563248e+004	1.563268e+003	13306	52	1.098559e+001	0	0	0	0	0	0	13526.8	1	1	46.5243	53.5349
DATA	226	3	56	0	1	ETG10_236652	ETG10_236652	4984.67	196.5	8.043312e+000	8.006615e+000	101.5	50	1.133739e+001	0	0	0	0	0	0	0.151657	0	0	57.5363	49.2281
DATA	227	3	57	0	0	A_42_P529780	NM_138855	5010.63	196.64	8.447479e+002	8.485778e+001	825.5	50	9.590600e+000	0	0	0	1	0	0	722.59	1	1	48.8603	50.3137
DATA	228	3	58	0	0	A_42_P492976	NM_001126099	5035.58	196.427	4.328199e+002	4.403311e+001	444	52.5	1.249251e+001	0	0	0	0	0	0	368.162	1	1	57.5363	54.7241
DATA	229	3	59	0	0	A_42_P533865	NM_001127650	5061.11	196.5	2.932050e+001	8.655922e+000	129.5	51	1.112430e+001	0	0	0	0	0	0	24.8	1	0	56.9804	53.25
DATA	230	3	60	0	0	A_64_P026399	NM_001007626	5087	196.729	1.365728e+003	1.368182e+002	1227	55	1.243692e+001	0	0	0	0	0	0	1148.66	1	1	46.8651	55.5283
DATA	231	3	61	0	0	A_64_P152543	XM_221353	5112.22	197.132	1.414850e+004	1.414874e+003	11578.5	54	1.172488e+001	0	0	0	0	0	0	11835.7	1	1	46.1809	56.0667
DATA	232	3	62	0	0	A_44_P203195	NM_053585	5137.33	196.5	7.963849e+002	8.006776e+001	746	54.5	1.429830e+001	0	0	0	0	0	0	662.557	1	1	57.5363	54.0227
DATA	233	3	63	0	0	A_42_P490612	NM_001108262	5162.74	196.778	1.047050e+004	1.047083e+003	8468.5	50	1.426491e+001	0	0	0	0	0	0	8664.98	1	1	47.5395	53.0417
DATA	234	3	64	0	0	A_44_P457548	NM_001103351	5188.11	196.5	1.088313e+002	1.372831e+001	189	52.5	1.063045e+001	0	0	0	0	0	0	89.5899	1	1	56.9804	52.6071
DATA	235	3	65	0	0	A_42_P755665	NM_001013154	5213.8	196.761	2.147128e+003	2.148775e+002	1840.5	51	1.110364e+001	0	0	0	0	0	0	1758.46	1	1	46.8651	51.3279
DATA	236	3	66	0	0	A_42_P781999	NM_001106378	5239.36	197.129	2.925755e+004	2.925767e+003	23004	51.5	1.207438e+001	0	0	0	0	0	0	23843.1	1	1	46.8651	51.5
DATA	237	3	67	0	0	A_44_P100289	ENSRNOT00000049514	5264.88	196.831	4.734743e+001	9.725009e+000	142	56	1.317277e+001	0	0	0	0	0	0	38.3957	1	1	45.835	55.1818
DATA	238	3	68	0	0	A_42_P629599	ENSRNOT00000023101	5289.86	197.045	6.956256e+002	7.008403e+001	642	49	9.728507e+000	0	0	0	0	0	0	561.536	1	1	46.5243	49.4468
DATA	239	3	69	0	0	A_44_P192083	NM_001047088	5315.55	196.726	4.606499e+001	9.732263e+000	138	59.5	2.591596e+001	0	0	0	0	1	0	37.0139	1	1	48.5334	66.2037
DATA	240	3	70	0	0	A_42_P498066	NM_031136	5340.42	196.573	1.057857e+005	1.057858e+004	85035.5	60	1.231468e+001	0	0	0	0	0	0	84638.5	1	1	57.5363	58.8776
DATA	241	3	71	0	0	A_42_P519910	NM_001106292	5366.24	197.235	3.124972e+004	3.124984e+003	24123	57	1.105306e+001	0	0	0	0	0	0	24901.2	1	1	46.1809	58.5686
DATA	242	3	72	0	0	A_42_P657538	NM_001008362	5391.43	197.299	4.804381e+003	4.805164e+002	3735	53.5	1.354810e+001	0	0	0	0	0	0	3813.58	1	1	46.1809	56
DATA	243	3	73	0	0	A_64_P030630	NM_001109610	5417.22	196.824	6.059633e+003	6.060259e+002	4902	54	1.188600e+001	0	0	0	0	0	0	4791.59	1	1	48.2044	57.2807
DATA	244	3	74	0	0	A_44_P126366	NM_001017456	5442	196.545	6.229890e+001	1.073414e+001	153.5	52	9.521477e+000	0	0	0	0	0	0	49.0946	1	1	55.8519	52.193
DATA	245	3	75	0	0	A_43_P15627	ENSRNOT00000067029	5468	197.226	6.284891e+003	6.285502e+002	5088	53	1.176240e+001	0	0	0	0	0	0	4937.38	1	1	45.4864	53.8654
DATA	246	3	76	0	0	A_42_P754784	CB328432	5493.31	196.897	9.020915e+003	9.021344e+002	7038	53	1.032957e+001	0	0	0	0	0	0	7065.88	1	1	45.835	52.9333
DATA	247	3	77	66	1	DarkCorner	DarkCorner	5518.93	197.182	8.857659e+000	8.817224e+000	85	50.5	1.240028e+001	0	0	0	0	0	0	-12.7891	0	0	36.9964	51.22
DATA	248	3	78	66	1	DarkCorner	DarkCorner	5543.58	196.573	8.878611e+000	8.838081e+000	84	52.5	1.293904e+001	0	0	0	0	0	0	-15.2666	0	0	57.5363	54.8824
DATA	249	3	79	66	1	DarkCorner	DarkCorner	5569.54	197.09	8.895772e+000	8.855163e+000	84	51	1.186496e+001	0	0	0	0	0	0	-13.2424	0	0	45.835	51.9783
DATA	250	3	80	66	1	DarkCorner	DarkCorner	5594.42	196.573	8.911142e+000	8.870463e+000	81	48	1.262473e+001	0	0	0	0	0	0	-13.8626	0	0	57.5363	50.0526
DATA	251	3	81	66	1	DarkCorner	DarkCorner	5619.86	196.625	8.922744e+000	8.882012e+000	83.5	49	9.143061e+000	0	0	0	0	0	0	-12.5995	0	0	42.9674	48.5593
DATA	252	3	82	66	1	DarkCorner	DarkCorner	5646.39	197.023	8.930751e+000	8.889983e+000	85	47	6.309545e+000	0	0	0	0	0	0	-13.1258	0	0	36.5637	47.1915
DATA	253	3	83	66	1	DarkCorner	DarkCorner	5670.5	196.648	8.936137e+000	8.895344e+000	80	48.5	1.139416e+001	0	0	0	0	0	0	-17.5766	0	0	65	50.5323
DATA	254	3	84	66	1	DarkCorner	DarkCorner	5696.01	196.592	8.937743e+000	8.896942e+000	84	50	1.230526e+001	0	0	0	0	0	0	-14.1995	0	0	47.8731	51.4074
DATA	255	3	85	66	1	DarkCorner	DarkCorner	5721.42	196.573	8.935576e+000	8.894786e+000	97.5	48	1.100242e+001	0	0	0	1	0	0	-0.346066	0	0	57.5363	49.3067
DATA	256	4	1	66	1	DarkCorner	DarkCorner	3601.42	203.069	7.769855e+000	7.734386e+000	87	50	9.902680e+000	0	0	0	0	0	0	-15.56	0	0	48.2044	50.7838
DATA	257	4	2	66	1	DarkCorner	DarkCorner	3626.78	203.483	7.701183e+000	7.666028e+000	85	52	1.323583e+001	0	0	0	0	0	0	-17.6261	0	0	42.9674	54.6727
DATA	258	4	3	66	1	DarkCorner	DarkCorner	3651.5	203	7.639657e+000	7.604782e+000	87.5	52	1.422653e+001	0	0	0	0	0	0	-14.5332	0	0	54.1152	55.359
DATA	259	4	4	66	1	DarkCorner	DarkCorner	3677.9	202.788	7.577863e+000	7.543271e+000	80	48.5	1.407068e+001	0	0	0	0	0	0	-23.0013	0	0	40.2912	51.625
DATA	260	4	5	66	1	DarkCorner	DarkCorner	3702.5	203.352	7.523280e+000	7.488936e+000	81	50.5	1.013474e+001	0	0	0	0	0	0	-21.2036	0	0	57.5363	50.75
DATA	261	4	6	66	1	DarkCorner	DarkCorner	3727.58	203.427	7.472049e+000	7.437939e+000	81.5	53	8.283929e+000	0	0	0	0	0	0	-19.8688	0	0	57.5363	52.4615
DATA	262	4	7	66	1	DarkCorner	DarkCorner	3753.82	203.287	7.422662e+000	7.388778e+000	82	51	1.124717e+001	0	0	0	0	0	0	-22.7362	0	0	50.4627	52.9677
DATA	263	4	8	66	1	DarkCorner	DarkCorner	3778.86	203.525	7.378777e+000	7.345094e+000	76	51	8.039175e+000	0	0	0	0	0	0	-24.509	0	0	42.9674	50.9118
DATA	264	4	9	66	1	DarkCorner	DarkCorner	3804.82	203.4	7.337361e+000	7.303866e+000	83.5	52	9.582227e+000	0	0	0	0	0	0	-18.9817	0	0	42.9674	52.3824
DATA	265	4	10	0	0	A_44_P807031	NM_001108921	3829.74	203.58	6.895376e+003	6.895758e+002	6482	49	1.005130e+001	0	0	0	0	0	0	6535.99	1	1	46.8651	49.8286
DATA	266	4	11	0	0	A_64_P025813	NM_001009379	3854.58	203.427	7.267641e+000	7.234465e+000	86	52	1.035141e+001	0	0	0	0	0	0	-16.957	0	0	57.5363	51.6389
DATA	267	4	12	0	0	A_64_P130551	XM_001081846	3880.42	203.427	7.236438e+000	7.203405e+000	92.5	47.5	1.119192e+001	0	0	0	0	0	0	-10.6953	0	0	57.5363	47.9583
DATA	268	4	13	0	0	A_42_P715449	NM_001033709	3905.5	203.352	2.163978e+003	2.165167e+002	2134.5	52	1.387970e+001	0	0	0	1	0	0	2077.17	1	1	57.5363	54.3846
DATA	269	4	14	0	0	A_42_P727584	NM_031622	3930.99	204.015	5.546309e+003	5.546770e+002	5220	58	1.319945e+001	0	0	0	0	0	0	5342.46	1	1	46.8651	58.6765
DATA	270	4	15	0	0	A_42_P600642	NM_001008386	3956.6	203.853	5.002994e+002	5.053546e+001	584	53	1.124421e+001	0	0	0	0	0	0	483.355	1	1	48.8603	55.0323
DATA	271	4	16	0	0	A_42_P669103	NM_001108329	3981.58	203.427	1.131300e+003	1.133533e+002	1182	49	9.549617e+000	0	0	0	0	0	0	1095.71	1	1	57.5363	50.3235
DATA	272	4	17	0	0	A_44_P715330	NM_001024966	4007.57	203.392	5.665518e+002	5.709788e+001	629.5	52.5	7.766696e+000	0	0	0	0	0	0	549.963	1	1	49.1849	52.4688
DATA	273	4	18	0	0	A_64_P083185	NM_001107199	4032.93	203.507	5.515153e+002	5.560455e+001	628.5	52	1.245465e+001	0	0	0	0	0	0	536.344	1	1	47.8731	54.4194
DATA	274	4	19	0	0	A_64_P037313	ENSRNOT00000030164	4058	203.455	9.869616e+000	7.141933e+000	116	58.5	1.350730e+001	0	0	0	0	1	0	9.61171	1	0	55.8519	60.0333
DATA	275	4	20	0	0	A_44_P321009	NM_012540	4083.42	203.427	7.363924e+000	7.104092e+000	109	52	1.014731e+001	0	0	0	0	0	0	7.17919	1	0	65	52.303
DATA	276	4	21	0	0	A_42_P700753	FQ212883	4108.82	203.955	2.450562e+003	2.451579e+002	2446.5	53	1.289669e+001	0	0	0	0	0	0	2390.95	1	1	45.835	53.4839
DATA	277	4	22	0	0	A_44_P775974	NM_001024363	4134.33	203.5	7.090465e+000	7.058098e+000	100	48	8.508872e+000	0	0	0	0	0	0	-1.10484	0	0	57.5363	49.3514
DATA	278	4	23	0	0	A_44_P503868	A_44_P503868	4160	204.226	2.894171e+003	2.895031e+002	2887	47	8.182991e+000	0	0	0	0	0	0	2824.96	1	1	45.4864	47.2571
DATA	279	4	24	0	0	A_64_P122541	A_64_P122541	4185.55	204.304	1.435426e+002	1.599629e+001	240	53	1.144694e+001	0	0	0	0	0	0	140.067	1	1	46.8651	53.6154
DATA	280	4	25	0	0	A_64_P080967	NM_001033890	4210.67	203.753	1.426365e+004	1.426383e+003	13652	50.5	6.964004e+000	0	0	0	0	0	0	13908.6	1	1	48.2044	50.1429
DATA	281	4	26	0	0	A_44_P1056309	NM_001105912	4236.17	203.5	1.743253e+001	7.283046e+000	117	50	1.052872e+001	0	0	0	0	0	0	16.982	1	0	49.8279	51.0556
DATA	282	4	27	0	0	A_44_P199514	NM_001005564	4261.23	203.712	3.199830e+003	3.200613e+002	3161	51	1.136090e+001	0	0	0	0	0	0	3113.34	1	1	48.5334	50.1515
DATA	283	4	28	0	0	A_64_P097952	NM_001134962	4286.5	203.5	5.963861e+001	9.265531e+000	160	51	1.024445e+001	0	0	0	0	0	0	57.936	1	1	65	52.2222
DATA	284	4	29	0	0	A_42_P813939	NM_001108741	4312.17	204	3.003263e+003	3.004103e+002	2914	51	1.048737e+001	0	0	0	0	0	0	2912.28	1	1	46.8651	52.4194
DATA	285	4	30	0	0	A_64_P006423	NM_012584	4337.42	203.427	7.151858e+000	7.142182e+000	108	57	1.126514e+001	0	0	0	0	0	0	5.53838	0	0	57.5363	59.1818
DATA	286	4	31	0	0	A_42_P670614	NM_001107097	4363.21	204.164	9.052397e+003	9.052678e+002	8482	56.5	1.380251e+001	0	0	0	0	0	0	8738.67	1	1	46.1809	56.3684
DATA	287	4	32	0	0	A_64_P084088	NM_001011954	4388.04	204.147	7.039007e+002	7.075271e+001	761	50	1.286104e+001	0	0	0	0	0	0	677.75	1	1	46.8651	52.2778
DATA	288	4	33	0	0	A_64_P025643	XM_001073566	4413.5	203.5	2.513702e+002	2.614115e+001	343.5	49.5	1.036620e+001	0	0	0	0	0	0	241.313	1	1	57.5363	50.2353
DATA	289	4	34	0	0	A_42_P719607	NM_153721	4438.67	203.5	9.197801e+000	7.256497e+000	110	51.5	7.833333e+000	0	0	0	0	0	0	8.80244	1	0	65	51.6944
DATA	290	4	35	0	0	A_42_P843603	NM_052800	4464.3	203.776	3.407990e+002	3.483675e+001	416.5	50.5	1.023471e+001	0	0	0	0	0	0	325.056	1	1	45.835	51.7778
DATA	291	4	36	0	0	A_44_P234129	NM_001135802	4490.06	204.175	1.236075e+002	1.432911e+001	216	56	1.100914e+001	0	0	0	0	0	0	117.476	1	1	45.4864	55.375
DATA	292	4	37	0	0	A_42_P701161	NM_001033666	4515.51	204.125	1.031324e+004	1.031350e+003	9559	49.5	7.422973e+000	0	0	0	0	0	0	9764.37	1	1	47.8731	50.2857
DATA	293	4	38	0	0	A_44_P1017335	NM_001108607	4540.93	204.418	1.124203e+004	1.124226e+003	10375.5	53	9.746600e+000	0	0	0	0	0	0	10601.7	1	1	45.835	55.9394
DATA	294	4	39	0	0	A_44_P900209	CV121387	4566.28	204.095	1.602487e+002	1.762402e+001	251	47	6.959824e+000	0	0	0	0	0	0	150.485	1	1	48.8603	46.9286
DATA	295	4	40	0	0	A_64_P037517	ENSRNOT00000014921	4591.45	204.212	2.762216e+001	7.867965e+000	125.5	51.5	1.084739e+001	0	0	0	0	0	0	25.8278	1	0	46.1809	50.8611
DATA	296	4	41	0	0	A_64_P128528	NM_001106013	4616.79	204.121	3.450334e+003	3.451128e+002	3315	51	1.119498e+001	0	0	0	0	0	0	3211.62	1	1	43.3362	50.5926
DATA	297	4	42	0	0	A_64_P378865	NM_001000706	4642	203.545	8.013397e+001	1.093174e+001	172	49.5	1.133480e+001	0	0	0	0	0	0	74.2384	1	1	55.8519	52.3529
DATA	298	4	43	0	0	A_42_P553960	NM_001107831	4667.87	203.771	1.252262e+004	1.252284e+003	11131.5	55	1.502994e+001	0	0	0	0	0	0	11544.7	1	1	46.5243	56.4483
DATA	299	4	44	0	0	A_42_P717654	XM_001063683	4693	203.809	5.274021e+003	5.274556e+002	4771	54	1.270429e+001	0	0	0	0	0	0	4838.36	1	1	46.8651	54.5517
DATA	300	4	45	0	0	A_44_P295118	NM_001107228	4718.42	203.573	2.988879e+002	3.082698e+001	381	53	1.105996e+001	0	0	0	0	0	0	272.797	1	1	57.5363	51.0286
DATA	301	4	46	0	0	A_64_P049057	ENSRNOT00000014519	4743.58	203.573	1.539052e+003	1.540921e+002	1477	59	1.668059e+001	0	0	0	0	0	0	1397.48	1	1	65	58.625
DATA	302	4	47	0	0	A_42_P810287	NM_001004107	4769.26	204.222	2.111045e+003	2.112422e+002	1953.5	52	1.219176e+001	0	0	0	0	0	0	1906.79	1	1	47.2035	53.2439
DATA	303	4	48	0	0	A_42_P702729	NM_001107557	4794.77	204.273	2.413043e+003	2.414261e+002	2211	48.5	1.064303e+001	0	0	0	0	0	0	2167.81	1	1	45.4864	48.625
DATA	304	4	49	0	0	A_42_P811084	NM_173147	4820.17	204	3.285660e+003	3.286565e+002	3014	49	7.351653e+000	0	0	0	0	0	0	2935.52	1	1	46.8651	49.2414
DATA	305	4	50	0	0	A_64_P151473	A_64_P151473	4845.66	204	2.725345e+004	2.725356e+003	24187	49.5	1.097221e+001	0	0	0	0	0	0	24214.3	1	1	45.4864	49.7083
DATA	306	4	51	0	0	A_44_P134634	ENSRNOT00000000260	4870.58	203.573	1.173480e+002	1.408858e+001	209	45	1.338399e+001	0	0	0	0	0	0	103.685	1	1	57.5363	51.2581
DATA	307	4	52	0	0	A_44_P178479	NM_001135039	4896.31	204.083	1.022924e+003	1.025924e+002	976	54	9.998067e+000	0	0	0	0	0	0	898.748	1	1	48.2044	52.2571
DATA	308	4	53	0	0	A_64_P317400	ENSRNOT00000068382	4921.85	204.583	2.065486e+001	8.150554e+000	118	56	1.148217e+001	0	0	0	0	0	0	18.0458	1	0	46.8651	56.2333
DATA	309	4	54	0	0	A_42_P781735	NM_053319	4947.25	203.788	9.790040e+004	9.790044e+003	85642	53.5	9.219482e+000	0	0	0	0	0	0	85038.8	1	1	51.4001	53.3667
DATA	310	4	55	0	0	A_64_P144869	NM_017131	4972.42	203.573	5.152902e+002	5.214259e+001	542	46.5	1.258455e+001	0	0	0	0	0	0	445.063	1	1	57.5363	49.875
DATA	311	4	56	0	0	A_44_P445484	ENSRNOT00000049980	4998	204.426	6.820564e+002	6.867556e+001	673	52	1.099450e+001	0	0	0	0	0	0	585.82	1	1	45.4864	50.9429
DATA	312	4	57	0	0	A_42_P487832	NM_001108389	5023.37	204.265	2.471701e+003	2.473017e+002	2114	47	9.261168e+000	0	0	0	0	0	0	2110.92	1	1	46.5243	47
DATA	313	4	58	0	0	A_42_P482829	NM_001108138	5048.57	204.29	9.240314e+002	9.275844e+001	857.5	49	8.436225e+000	0	0	0	0	0	0	784.764	1	1	46.8651	51.6452
DATA	314	4	59	0	0	A_64_P101440	XM_001065775	5074.24	203.88	8.194944e+000	8.157540e+000	102	53	1.152398e+001	0	0	0	0	0	0	0.0794431	0	0	48.8603	55.5294
DATA	315	4	60	0	0	A_64_P072268	NM_001002277	5099.6	204.262	7.068503e+002	7.115932e+001	701.5	53	9.195470e+000	0	0	0	0	0	0	593.647	1	1	45.1352	55.16
DATA	316	4	61	0	0	A_42_P589190	NM_023104	5124.5	203.648	9.265651e+002	9.302281e+001	848	54	1.936326e+001	0	0	0	0	1	0	773.939	1	1	57.5363	60.6897
DATA	317	4	62	0	0	A_64_P027328	A_64_P027328	5149.91	203.614	4.765010e+002	4.836613e+001	506.5	49.5	1.365577e+001	0	0	0	0	0	0	395.873	1	1	57.259	52.9643
DATA	318	4	63	0	0	A_42_P788541	NM_001106794	5175.55	204.373	7.457201e+003	7.457667e+002	6118	53	1.472038e+001	0	0	0	0	0	0	6163.28	1	1	46.1809	57.7586
DATA	319	4	64	0	0	A_42_P457003	NM_012802	5200.84	204.103	7.146735e+003	7.147226e+002	5924.5	53	1.245786e+001	0	0	0	0	0	0	5876.09	1	1	46.5243	53.9143
DATA	320	4	65	0	0	A_64_P095695	A_64_P095695	5226.91	203.754	7.172892e+001	1.106270e+001	158	54	1.191969e+001	0	0	0	0	0	0	58.6677	1	1	46.5243	54.2571
DATA	321	4	66	0	0	A_42_P463880	NM_001013927	5251.5	204	6.746145e+001	1.082192e+001	161.5	58	1.059148e+001	0	0	0	0	0	0	54.9184	1	1	54.1152	58.2222
DATA	322	4	67	0	0	A_43_P20354	NM_001134574	5277.5	204	9.515227e+001	1.276101e+001	175	52	9.310199e+000	0	0	0	0	0	0	77.0846	1	1	48.5334	51.5862
DATA	323	4	68	0	0	A_64_P055958	ENSRNOT00000056114	5302.66	204.182	2.859635e+001	9.007587e+000	124	60	1.441291e+001	0	0	0	0	0	0	23.0621	1	0	48.8603	58.9167
DATA	324	4	69	0	0	A_64_P159044	ENSRNOT00000040690	5328.3	204.228	1.205513e+003	1.208562e+002	1100.5	59	1.339302e+001	0	0	0	0	1	0	967.903	1	1	49.5074	59.5429
DATA	325	4	70	0	0	A_44_P473234	ENSRNOT00000024858	5353.09	203.935	6.851874e+002	6.905827e+001	652	58	1.351271e+001	0	0	0	0	1	0	547.845	1	1	54.4085	60.3714
DATA	326	4	71	0	0	A_42_P797965	NM_001108497	5378.82	204.141	1.423384e+003	1.426010e+002	1197.5	57	1.154009e+001	0	0	0	0	0	0	1133.51	1	1	46.8651	57.4074
DATA	327	4	72	0	0	A_42_P592157	NM_001002828	5404	204	3.486303e+002	3.592806e+001	375.5	59	1.137447e+001	0	0	0	1	0	0	276.582	1	1	54.9904	58.6129
DATA	328	4	73	0	0	A_64_P016419	NM_001000622	5429.54	204.368	4.234735e+001	9.688003e+000	132	56.5	1.114526e+001	0	0	0	0	0	0	33.4784	1	0	46.5243	58.9063
DATA	329	4	74	0	0	A_44_P306863	XM_344447	5454.91	204.104	1.631514e+003	1.633855e+002	1403	53	1.281601e+001	0	0	0	0	0	0	1285.51	1	1	46.8651	55.9167
DATA	330	4	75	0	0	A_42_P471835	TC610276	5480.78	204.084	4.946301e+003	4.947078e+002	3880.5	56	7.388949e+000	0	0	0	0	0	0	3885.27	1	1	49.8279	56.3214
DATA	331	4	76	0	1	ETG02_36680	ETG02_36680	5505.5	204	8.833768e+000	8.828007e+000	107	59	1.818487e+001	0	0	0	0	1	0	6.11369	0	0	54.1152	64.2424
DATA	332	4	77	66	1	DarkCorner	DarkCorner	5530.61	204.069	8.855185e+000	8.814762e+000	89.5	59	1.166578e+001	0	0	0	0	0	0	-14.3752	0	0	53.8203	56.9032
DATA	333	4	78	66	1	DarkCorner	DarkCorner	5556.5	204	8.874753e+000	8.834240e+000	81	61	1.141198e+001	0	0	0	0	1	0	-15.1623	0	0	54.1152	59.85
DATA	334	4	79	66	1	DarkCorner	DarkCorner	5581.5	204	8.890715e+000	8.850129e+000	82	54	1.308874e+001	0	0	0	0	0	0	-17.4183	0	0	54.1152	54.5625
DATA	335	4	80	66	1	DarkCorner	DarkCorner	5608.12	204.24	8.904076e+000	8.863430e+000	82	50	1.125303e+001	0	0	0	0	0	0	-13.0972	0	0	40.2912	50.4545
DATA	336	4	81	66	1	DarkCorner	DarkCorner	5632.43	204.306	8.913520e+000	8.872830e+000	80.5	49	8.772614e+000	0	0	0	0	0	0	-17.2973	0	0	39.4933	48.5263
DATA	337	4	82	66	1	DarkCorner	DarkCorner	5658.21	204.771	8.919513e+000	8.878797e+000	82	46	8.121523e+000	0	0	0	0	0	0	-16.1487	0	0	46.8651	45.3226
DATA	338	4	83	66	1	DarkCorner	DarkCorner	5684.57	205.067	8.922283e+000	8.881553e+000	79	48	1.165790e+001	0	0	0	0	0	0	-17.2429	0	0	43.7019	49.3333
DATA	339	4	84	66	1	DarkCorner	DarkCorner	5709.94	204.917	8.922065e+000	8.881336e+000	83	46	6.677747e+000	0	0	0	0	0	0	-13.1415	0	0	37.847	46.65
DATA	340	4	85	66	1	DarkCorner	DarkCorner	5734.09	204.386	8.919080e+000	8.878365e+000	91.5	44	9.875227e+000	0	0	0	0	0	0	-5.88093	0	0	57.259	44.9722
DATA	341	5	1	66	1	DarkCorner	DarkCorner	3588.33	210.5	7.795704e+000	7.760117e+000	87	44	9.373931e+000	0	0	0	0	0	0	-16.2981	0	0	57.5363	44.9064
DATA	342	5	2	66	1	DarkCorner	DarkCorner	3613.5	210.5	7.726319e+000	7.691049e+000	94	50.5	1.149520e+001	0	0	0	1	0	0	-5.38812	0	0	57.5363	53
DATA	343	5	3	66	1	DarkCorner	DarkCorner	3639.73	212	7.656531e+000	7.621579e+000	82	56	1.336756e+001	0	0	0	0	0	0	-22.0354	0	0	39.0882	57.025
DATA	344	5	4	66	1	DarkCorner	DarkCorner	3664.76	211.185	7.597247e+000	7.562566e+000	80	49	1.321137e+001	0	0	0	0	0	0	-23.1188	0	0	40.6843	50.9024
DATA	345	5	5	66	1	DarkCorner	DarkCorner	3690.37	210.524	7.540388e+000	7.505967e+000	83	49	1.048737e+001	0	0	0	0	0	0	-22.8832	0	0	44.4243	50.4194
DATA	346	5	6	66	1	DarkCorner	DarkCorner	3715.11	210.5	7.488464e+000	7.454280e+000	81.5	53	8.724747e+000	0	0	0	0	0	0	-21.401	0	0	56.9804	50.6061
DATA	347	5	7	66	1	DarkCorner	DarkCorner	3740.5	210.5	7.438922e+000	7.404964e+000	75	54	1.057840e+001	0	0	0	0	0	0	-28.6497	0	0	57.5363	54.5429
DATA	348	5	8	66	1	DarkCorner	DarkCorner	3766.39	211.068	7.391592e+000	7.357850e+000	84	53	1.022566e+001	0	0	0	0	0	0	-18.1619	0	0	43.3362	52.2759
DATA	349	5	9	66	1	DarkCorner	DarkCorner	3791.42	210.427	7.350720e+000	7.317164e+000	81	50	9.868599e+000	0	0	0	0	0	0	-20.6866	0	0	57.5363	52.4516
DATA	350	5	10	0	0	A_43_P17919	XM_001070979	3817.36	210.753	9.704311e+000	7.341892e+000	110.5	53	1.307402e+001	0	0	0	0	0	0	9.18571	1	0	48.5334	53.6333
DATA	351	5	11	0	0	A_42_P826221	NM_012933	3842.17	211.071	5.642964e+003	5.643429e+002	5289	50.5	1.166806e+001	0	0	0	0	0	0	5366.97	1	1	46.8651	51.1667
DATA	352	5	12	0	0	A_64_P011524	NM_001194951	3867.71	211.167	6.792747e+002	6.830911e+001	749	54	1.116686e+001	0	0	0	0	0	0	648.935	1	1	45.835	51.2941
DATA	353	5	13	0	0	A_44_P258417	NM_001009699	3893.32	211.028	7.864668e+001	1.065043e+001	179	52	1.270451e+001	0	0	0	0	0	0	75.4353	1	1	48.2044	51.5926
DATA	354	5	14	0	0	A_64_P164617	A_64_P164617	3918.33	210.5	6.130050e+004	6.130054e+003	58750	53	1.417423e+001	0	0	0	0	0	0	59000.8	1	1	57.5363	53.8621
DATA	355	5	15	0	0	A_42_P758933	NM_001106476	3943.72	211.095	9.486518e+003	9.486786e+002	8876.5	56.5	1.319824e+001	0	0	0	1	0	0	9160.31	1	1	48.8603	57.5
DATA	356	5	16	0	0	A_42_P573312	NM_001134761	3969.16	211.179	7.041475e+002	7.077320e+001	761	49	1.043104e+001	0	0	0	0	0	0	681.831	1	1	46.1809	49.2647
DATA	357	5	17	0	0	A_64_P096257	NM_001160228	3994.77	210.884	1.189726e+003	1.191841e+002	1212.5	50	8.289224e+000	0	0	0	0	0	0	1154.74	1	1	46.5243	50.2105
DATA	358	5	18	0	0	A_43_P15847	NM_178847	4020	210.984	7.595429e+001	1.038565e+001	173	52	1.129570e+001	0	0	0	0	0	0	73.8676	1	1	44.0646	52.697
DATA	359	5	19	0	0	A_64_P139962	NM_001000675	4045.42	210.573	7.104513e+000	7.072082e+000	98	58	1.201069e+001	0	0	0	0	0	0	-2.51212	0	0	57.5363	57.44
DATA	360	5	20	0	0	A_64_P117474	NM_001000646	4070.58	210.573	7.095736e+000	7.063345e+000	102	57.5	1.272070e+001	0	0	0	0	0	0	-2.5543	0	0	57.5363	58.6667
DATA	361	5	21	0	1	ERCC-00075_180	ERCC-00075_180	4096	210.545	2.726018e+001	7.565297e+000	128	53	1.358227e+001	0	0	0	1	0	0	26.6092	1	0	55.8519	55.2667
DATA	362	5	22	0	0	A_42_P740730	NM_001012136	4121.42	210.573	2.182499e+001	7.383235e+000	123	50	9.067813e+000	0	0	0	0	0	0	21.3153	1	0	57.5363	50.6757
DATA	363	5	23	0	0	A_42_P702258	NM_017227	4146.58	210.573	2.055371e+001	7.345367e+000	122	47	7.470425e+000	0	0	0	0	0	0	20.0775	1	0	57.5363	47.2368
DATA	364	5	24	0	0	A_42_P668800	NM_001127553	4172.55	211.464	1.774510e+003	1.775911e+002	1784.5	50	9.701252e+000	0	0	0	0	0	0	1733.32	1	1	46.1809	51.0571
DATA	365	5	25	0	0	A_42_P842513	NM_031077	4198	211.226	4.340649e+003	4.341223e+002	4246	53	8.781122e+000	0	0	0	0	0	0	4237.75	1	1	45.4864	51.9459
DATA	366	5	26	0	0	A_64_P047697	NM_001161835	4223	210.545	8.483144e+002	8.512486e+001	954	49	9.154496e+000	0	0	0	0	0	0	827.495	1	1	55.8519	48.973
DATA	367	5	27	0	0	A_42_P660036	NM_001134727	4248.74	211.222	2.364362e+002	2.467782e+001	327.5	50	1.034777e+001	0	0	0	0	0	0	230.394	1	1	47.2035	49.8276
DATA	368	5	28	0	0	A_64_P095050	A_64_P095050	4273.58	210.573	6.179348e+004	6.179352e+003	59981	51	1.062134e+001	0	0	0	0	0	0	60127.5	1	1	57.5363	52.2069
DATA	369	5	29	0	0	A_42_P561835	ENSRNOT00000043937	4299.41	211.227	2.490358e+002	2.589347e+001	329	54	9.899495e+000	0	0	0	0	0	0	241.923	1	1	46.1809	53
DATA	370	5	30	0	0	A_64_P098774	ENSRNOT00000002068	4324.58	210.573	8.891351e+000	7.160918e+000	105	54	1.273217e+001	0	0	0	0	0	0	8.61989	1	0	57.5363	55.9459
DATA	371	5	31	0	0	A_64_P163184	NM_001107855	4350.57	211.265	7.474962e+002	7.508807e+001	830.5	57	1.230204e+001	0	0	0	0	0	0	723.067	1	1	46.8651	58.0976
DATA	372	5	32	0	0	A_42_P549675	NM_080577	4375.6	211.414	4.823862e+003	4.824391e+002	4642	57	1.284225e+001	0	0	0	0	0	0	4654.76	1	1	47.2035	55.56
DATA	373	5	33	0	0	A_64_P287740	NM_001127601	4400.73	211.033	8.980476e+001	1.148459e+001	188.5	47	1.080709e+001	0	0	0	0	0	0	86.4161	1	1	43.7019	49.1714
DATA	374	5	34	0	0	A_64_P059545	NM_053477	4426.73	211.306	7.082714e+003	7.083078e+002	7052	56	1.096189e+001	0	0	0	0	0	0	6794.73	1	1	44.4243	55.1143
DATA	375	5	35	0	0	A_44_P465856	NM_199398	4451.5	210.648	7.236870e+000	7.203834e+000	94	51	9.693132e+000	0	0	0	0	0	0	-7.22273	0	0	65	52.7949
DATA	376	5	36	0	0	A_42_P714075	NM_031723	4477.33	210.833	9.072413e+002	9.101169e+001	961	54	1.080598e+001	0	0	0	0	0	0	864.504	1	1	49.8279	52.6667
DATA	377	5	37	0	0	A_42_P605265	NM_053677	4502.5	210.648	2.504540e+001	7.675781e+000	127	49	8.844283e+000	0	0	0	0	0	0	23.7782	1	0	57.5363	51.3043
DATA	378	5	38	0	0	A_64_P047401	NM_001009369	4527.84	211.275	2.859977e+003	2.860904e+002	2750	54	9.004272e+000	0	0	0	0	0	0	2704.98	1	1	46.5243	55
DATA	379	5	39	0	0	A_64_P018891	A_64_P018891	4553.37	210.596	1.032448e+002	1.265253e+001	198	50	1.069530e+001	0	0	0	0	0	0	97.2421	1	1	57.8122	53.9583
DATA	380	5	40	0	0	A_64_P026297	NM_022583	4578.5	210.648	6.973403e+001	1.012778e+001	167	47.5	9.295487e+000	0	0	0	0	0	0	65.4039	1	1	57.5363	50.5357
DATA	381	5	41	0	0	A_43_P13508	NM_001015031	4604.4	211.283	3.430546e+001	8.135922e+000	134	51	1.068548e+001	0	0	0	0	0	0	32.0328	1	0	43.3362	50.7778
DATA	382	5	42	0	0	A_64_P077426	XM_001080794	4629.87	211	1.404728e+004	1.404747e+003	12924	50	1.393172e+001	0	0	0	0	0	0	13055.9	1	1	48.5334	51.0303
DATA	383	5	43	0	0	A_44_P370175	NM_031773	4654.87	210.984	6.343240e+001	9.781868e+000	163.5	56	1.116192e+001	0	0	0	0	0	0	58.6808	1	1	45.1352	54.1282
DATA	384	5	44	0	0	A_64_P084288	NM_001000496	4680.39	210.931	7.517365e+000	7.483749e+000	101	54.5	1.095222e+001	0	0	0	0	0	0	0.942383	0	0	53.8203	54.3929
DATA	385	5	45	0	0	A_44_P400936	A_44_P400936	4705.82	211.155	4.036890e+002	4.106343e+001	468	52.5	9.842054e+000	0	0	0	0	0	0	369.769	1	1	46.8651	50.575
DATA	386	5	46	0	0	A_64_P019599	NM_012713	4731.24	211.313	5.036880e+002	5.093285e+001	551	53.5	1.763625e+001	0	0	0	0	0	0	459.013	1	1	45.835	53.8611
DATA	387	5	47	0	0	A_44_P644356	AI556299	4756.5	211	1.992827e+001	7.855809e+000	118	56	1.471143e+001	0	0	0	0	0	0	18.0655	1	0	54.1152	54.3636
DATA	388	5	48	0	0	A_64_P057076	A_64_P057076	4782.21	211.314	1.162801e+002	1.391311e+001	209	53	1.325354e+001	0	0	0	0	0	0	104.848	1	1	46.8651	52.9524
DATA	389	5	49	0	0	A_64_P087392	NM_001108764	4807	211	1.566651e+002	1.744790e+001	236	47	1.296202e+001	0	0	0	0	0	0	140.512	1	1	54.9904	48.4231
DATA	390	5	50	0	0	A_44_P436604	NM_001025627	4832.5	211	5.255593e+001	9.341550e+000	153	47	8.591008e+000	0	0	0	0	0	0	46.8781	1	1	54.1152	46.6552
DATA	391	5	51	0	0	A_43_P23200	NM_001107832	4858	211	4.843148e+002	4.905017e+001	534	48.5	1.562270e+001	0	0	0	0	0	0	429.592	1	1	54.9904	52.0714
DATA	392	5	52	0	0	A_42_P515876	NM_031097	4883.73	211.3	7.082532e+002	7.125461e+001	722.5	45	1.113326e+001	0	0	0	1	0	0	624.705	1	1	46.8651	48.8571
DATA	393	5	53	0	0	A_44_P1047924	NM_053523	4909.44	211.465	7.053801e+003	7.054238e+002	6092.5	56	8.649445e+000	0	0	0	0	0	0	6186.49	1	1	47.2035	55.2903
DATA	394	5	54	0	0	A_44_P682668	NM_001014228	4934	211	1.165238e+002	1.407679e+001	206	54	9.856066e+000	0	0	0	0	0	0	101.631	1	1	54.9904	53.7273
DATA	395	5	55	0	0	A_64_P061489	NM_001108746	4959.5	211	1.871505e+001	8.160568e+000	118	54	9.497338e+000	0	0	0	0	0	0	16.2305	1	0	54.1152	53.2593
DATA	396	5	56	0	0	A_64_P047747	NM_182474	4985.54	211.557	1.875873e+003	1.877573e+002	1713.5	47	1.080661e+001	0	0	0	0	0	0	1617.55	1	1	46.1809	48.871
DATA	397	5	57	0	0	A_64_P091163	NM_001107083	5010.5	211	3.224011e+001	8.656679e+000	128	52	1.210252e+001	0	0	0	0	0	0	27.6438	1	0	54.1152	51.7857
DATA	398	5	58	0	0	A_64_P133992	NM_001008825	5035.5	211	7.809220e+001	1.123599e+001	168	50	9.327115e+000	0	0	0	0	0	0	66.5888	1	1	54.1152	52.931
DATA	399	5	59	0	0	A_42_P503768	NM_001009466	5061.09	211.386	4.252244e+002	4.329148e+001	456	49	1.075951e+001	0	0	0	0	0	0	360.572	1	1	57.259	53.7273
DATA	400	5	60	0	0	A_44_P400346	ENSRNOT00000059540	5086.5	211.352	4.381081e+001	9.269600e+000	140.5	53	1.055391e+001	0	0	0	0	0	0	36.944	1	1	65	53.4194
DATA	401	5	61	0	0	A_64_P128438	NM_012591	5111.97	211.731	3.408912e+003	3.409901e+002	2893	51	1.135642e+001	0	0	0	0	0	0	2859.04	1	1	49.5074	50.8261
DATA	402	5	62	0	0	A_44_P531758	NM_012935	5137.42	211.427	6.823154e+004	6.823159e+003	56278.5	52	1.199693e+001	0	0	0	0	0	0	56913.7	1	1	57.5363	53.7333
DATA	403	5	63	0	0	A_43_P10257	NM_203335	5162.81	211.481	9.596939e+003	9.597298e+002	7715	54	1.328140e+001	0	0	0	0	0	0	7962.74	1	1	49.8279	54.6071
DATA	404	5	64	0	0	A_64_P011744	NM_001108789	5188.09	211.386	3.295451e+002	3.399484e+001	366	49.5	1.033374e+001	0	0	0	0	0	0	272.01	1	1	57.259	50.2
DATA	405	5	65	0	0	A_44_P282794	NM_001107523	5213.5	211.352	4.329929e+001	9.439912e+000	135	51	1.042764e+001	0	0	0	0	0	0	35.5579	1	1	57.5363	51.9091
DATA	406	5	66	0	0	A_42_P463784	NM_001008526	5239.5	211.5	2.003049e+003	2.004822e+002	1707	56	1.449375e+001	0	0	0	1	0	0	1636.64	1	1	49.1849	57.0714
DATA	407	5	67	0	0	A_42_P630463	NM_022238	5264.39	211.333	3.096987e+002	3.210747e+001	353	53	1.235905e+001	0	0	0	1	0	0	251.847	1	1	47.2035	54.7097
DATA	408	5	68	0	0	A_64_P006728	NM_001108905	5290.06	211.382	3.958389e+003	3.959304e+002	3213.5	51	8.535928e+000	0	0	0	0	0	0	3203.87	1	1	46.1809	51.8276
DATA	409	5	69	0	0	A_44_P360629	NM_001000030	5315.38	211.763	8.069330e+001	1.175539e+001	165.5	52	1.461883e+001	0	0	0	0	0	0	65.0252	1	1	49.1849	54.9091
DATA	410	5	70	0	0	A_64_P024620	NM_001006995	5340.8	211.761	2.129760e+004	2.129777e+003	16876.5	51.5	1.362996e+001	0	0	0	0	0	0	17088.5	1	1	46.8651	54.5
DATA	411	5	71	0	0	A_64_P091194	ENSRNOT00000049254	5366.29	211.829	1.519376e+004	1.519400e+003	12092	52	1.476471e+001	0	0	0	0	0	0	12141.1	1	1	50.7771	55.3429
DATA	412	5	72	0	0	A_44_P334922	NM_022379	5391.42	211.427	8.694176e+000	8.656043e+000	99.5	55	1.269436e+001	0	0	0	0	0	0	1.30571	0	0	57.5363	56.4643
DATA	413	5	73	0	0	A_42_P482051	XM_001059157	5416.58	211.427	2.146298e+003	2.148055e+002	1738.5	53.5	9.382057e+000	0	0	0	1	0	0	1702.16	1	1	57.5363	54.3333
DATA	414	5	74	0	0	A_42_P674742	XM_002726367	5442.27	211.608	1.038180e+004	1.038217e+003	8094	57.5	1.092792e+001	0	0	0	0	0	0	8205.36	1	1	48.5334	59.25
DATA	415	5	75	0	0	A_64_P105211	XM_233310	5467.42	211.427	4.307771e+001	9.746981e+000	136	55	7.486219e+000	0	0	0	0	0	0	33.9392	1	0	57.5363	56.0435
DATA	416	5	76	0	0	A_64_P058523	NM_134385	5492.58	211.427	1.437353e+001	8.885505e+000	109.5	64	1.973006e+001	0	0	0	0	1	0	11.2919	1	0	57.5363	69.6538
DATA	417	5	77	0	0	A_44_P586876	NM_001100805	5518.44	211.973	1.402270e+003	1.405022e+002	1158.5	59.5	1.417577e+001	0	0	0	0	1	0	1098.83	1	1	48.5334	62.7143
DATA	418	5	78	66	1	DarkCorner	DarkCorner	5543.33	211.462	8.851977e+000	8.811569e+000	82	57.5	1.093249e+001	0	0	0	0	0	0	-15.3627	0	0	40.6843	58.2391
DATA	419	5	79	66	1	DarkCorner	DarkCorner	5568.69	212.254	8.868174e+000	8.827692e+000	83	59	1.232883e+001	0	0	0	0	1	0	-16.5059	0	0	47.5395	60
DATA	420	5	80	66	1	DarkCorner	DarkCorner	5594.42	211.427	8.884538e+000	8.843981e+000	83	50	1.246540e+001	0	0	0	0	0	0	-13.5289	0	0	57.5363	52.5769
DATA	421	5	81	66	1	DarkCorner	DarkCorner	5620.09	212.472	8.894390e+000	8.853787e+000	84.5	50	1.134946e+001	0	0	0	0	0	0	-14.7893	0	0	41.4593	52.1034
DATA	422	5	82	66	1	DarkCorner	DarkCorner	5645.33	211.5	8.904451e+000	8.863803e+000	84	47	1.092453e+001	0	0	0	0	0	0	-14.8539	0	0	65	47.6486
DATA	423	5	83	66	1	DarkCorner	DarkCorner	5670.5	211.5	8.909438e+000	8.868767e+000	81.5	47	1.117169e+001	0	0	0	0	0	0	-17.4723	0	0	57.5363	48.2143
DATA	424	5	84	66	1	DarkCorner	DarkCorner	5695.89	211.5	8.910977e+000	8.870299e+000	85	46	8.069732e+000	0	0	0	0	0	0	-13.1993	0	0	56.9804	46.8333
DATA	425	5	85	66	1	DarkCorner	DarkCorner	5721.78	211.932	8.908013e+000	8.867349e+000	87	46.5	1.018258e+001	0	0	0	0	0	0	-9.31153	0	0	47.8731	47.8684
DATA	426	6	1	66	1	DarkCorner	DarkCorner	3600.58	217.573	7.751172e+000	7.715788e+000	84.5	50.5	9.968502e+000	0	0	0	0	0	0	-18.635	0	0	65	50.0385
DATA	427	6	2	66	1	DarkCorner	DarkCorner	3627.34	218.368	7.679133e+000	7.644079e+000	81	50.5	1.005513e+001	0	0	0	0	0	0	-20.3032	0	0	47.8731	51.3333
DATA	428	6	3	66	1	DarkCorner	DarkCorner	3651.58	217.573	7.620066e+000	7.585281e+000	80	50	8.781698e+000	0	0	0	0	0	0	-20.902	0	0	57.5363	50.2414
DATA	429	6	4	66	1	DarkCorner	DarkCorner	3677.38	218.054	7.559565e+000	7.525056e+000	76	47.5	1.250477e+001	0	0	0	0	0	0	-23.6137	0	0	42.5954	50.2
DATA	430	6	5	66	1	DarkCorner	DarkCorner	3703.28	218.019	7.503635e+000	7.469381e+000	83.5	50	8.460298e+000	0	0	0	0	0	0	-19.9433	0	0	41.4593	48.6176
DATA	431	6	6	66	1	DarkCorner	DarkCorner	3728.75	218	7.452532e+000	7.418511e+000	79	54	7.131937e+000	0	0	0	0	0	0	-22.705	0	0	39.8942	53.6897
DATA	432	6	7	66	1	DarkCorner	DarkCorner	3753.42	217.573	7.407093e+000	7.373280e+000	81	51	1.139960e+001	0	0	0	0	0	0	-20.6574	0	0	57.5363	52.5588
DATA	433	6	8	66	1	DarkCorner	DarkCorner	3778.5	217.648	7.363809e+000	7.330194e+000	79	52	8.239867e+000	0	0	0	0	0	0	-19.3054	0	0	57.5363	53.0333
DATA	434	6	9	0	0	A_64_P034324	NM_001108282	3803.91	217.614	5.941886e+001	9.404906e+000	161.5	49	9.202272e+000	0	0	0	0	0	0	56.1458	1	1	57.259	49.5
DATA	435	6	10	0	0	A_64_P071506	ENSRNOT00000025007	3829.5	217.648	7.286453e+000	7.287973e+000	111	52	1.385335e+001	0	0	0	0	0	0	6.75429	0	0	65	52.3462
DATA	436	6	11	0	0	A_64_P050705	NM_001106061	3854.58	217.573	1.304133e+002	1.490669e+001	230.5	49	1.061842e+001	0	0	0	0	0	0	124.421	1	1	57.5363	51.1622
DATA	437	6	12	0	0	A_64_P032242	NM_001008898	3880.42	217.573	7.222633e+000	7.189662e+000	93	52	1.019105e+001	0	0	0	0	0	0	-11.048	0	0	57.5363	51.0667
DATA	438	6	13	0	0	A_42_P730320	NM_001013877	3905.5	218	3.915423e+001	8.162905e+000	135.5	52	1.198777e+001	0	0	0	0	0	0	37.6564	1	1	54.1152	52.04
DATA	439	6	14	0	0	A_64_P123073	A_64_P123073	3931	218	2.481951e+002	2.582568e+001	343	53	1.248874e+001	0	0	0	0	0	0	239.506	1	1	65	54.7407
DATA	440	6	15	0	0	A_64_P064709	NM_001166303	3956.95	218.516	6.237537e+001	9.463195e+000	162	54	1.011429e+001	0	0	0	0	0	0	60.3772	1	1	43.7019	54.6667
DATA	441	6	16	0	0	A_44_P123381	NM_013012	3981.51	218.796	1.167247e+001	7.194065e+000	115	48	7.752695e+000	0	0	0	0	0	0	11.3269	1	0	39.8942	47.3235
DATA	442	6	17	0	0	A_44_P557487	NM_053617	4007.34	218.271	7.116026e+000	7.097203e+000	104	49	1.068081e+001	0	0	0	0	0	0	4.28025	0	0	47.5395	49.8148
DATA	443	6	18	0	0	A_64_P084971	NM_017007	4032.5	218	5.285351e+004	5.285356e+003	50799	52	1.028913e+001	0	0	0	0	0	0	51488.3	1	1	54.1152	52.5926
DATA	444	6	19	0	0	A_42_P770556	NM_033096	4058.09	218.104	7.835663e+003	7.835981e+002	7598	57	1.027985e+001	0	0	0	0	0	0	7644.29	1	1	46.8651	56.6538
DATA	445	6	20	0	0	A_64_P023381	XM_001073278	4083.5	218	4.851765e+001	8.561179e+000	147	55	1.057620e+001	0	0	0	0	0	0	47.3821	1	1	54.1152	56.4516
DATA	446	6	21	0	0	A_64_P059217	NM_053667	4108.5	218	3.148431e+002	3.226372e+001	419.5	51	1.164261e+001	0	0	0	0	0	0	307.687	1	1	54.1152	53.0714
DATA	447	6	22	0	0	A_44_P286215	NM_001008885	4134.5	218.444	2.026220e+002	2.145230e+001	301	48	9.118086e+000	0	0	0	0	0	0	198.098	1	1	47.8731	49.4857
DATA	448	6	23	0	0	A_64_P138056	A_64_P138056	4159.5	218	4.739820e+002	4.791907e+001	569	47	9.962392e+000	0	0	0	0	0	0	463.383	1	1	54.1152	47.973
DATA	449	6	24	0	0	A_44_P280799	NM_001000654	4185	218	7.080667e+000	7.055839e+000	104	51	1.019152e+001	0	0	0	0	0	0	3.17754	0	0	54.9904	49.6053
DATA	450	6	25	0	0	A_64_P111599	NM_001191586	4210.57	218.231	6.528068e+002	6.566054e+001	737	49	1.018532e+001	0	0	0	0	0	0	637.617	1	1	45.4864	50.5
DATA	451	6	26	0	0	A_64_P088635	ENSRNOT00000059643	4236.02	218.238	7.297554e+000	7.097005e+000	109	50	1.036096e+001	0	0	0	0	0	0	7.12097	1	0	45.4864	50.0571
DATA	452	6	27	0	0	A_64_P042332	NM_021860	4261.09	218.065	7.100672e+000	7.068258e+000	99	51	1.052879e+001	0	0	0	0	0	0	-1.06517	0	0	65	51.1538
DATA	453	6	28	0	0	A_42_P599080	NM_053753	4286.5	218	5.639506e+001	9.050950e+000	159.5	51.5	1.002302e+001	0	0	0	0	0	0	54.8761	1	1	54.1152	52.4333
DATA	454	6	29	0	0	A_44_P576954	NM_001106645	4311.91	218.065	6.014701e+002	6.056369e+001	691	50.5	9.208663e+000	0	0	0	0	0	0	584.204	1	1	54.4085	51.4412
DATA	455	6	30	0	0	A_64_P046687	A_64_P046687	4337.4	218.357	3.245792e+003	3.246570e+002	3118.5	54	9.017909e+000	0	0	0	0	0	0	3146.06	1	1	47.2035	53.9714
DATA	456	6	31	0	0	A_42_P694928	NM_001109046	4363	218.5	3.839723e+002	3.905249e+001	465	56	1.134749e+001	0	0	0	0	0	0	371.29	1	1	48.5334	55.9677
DATA	457	6	32	0	0	A_64_P032811	NM_001134575	4388.09	218.386	7.194242e+001	1.013767e+001	168	49	9.158155e+000	0	0	0	0	0	0	69.3848	1	1	57.259	50.5556
DATA	458	6	33	0	0	A_64_P141070	ENSRNOT00000058701	4413.5	218.352	6.273172e+001	9.521710e+000	162	56.5	1.495883e+001	0	0	0	0	0	0	60.3273	1	1	57.5363	56.2632
DATA	459	6	34	0	0	A_64_P093462	NM_001108129	4439	218.343	1.976818e+004	1.976831e+003	18297	49	8.279748e+000	0	0	0	0	0	0	18951.1	1	1	45.4864	49.5357
DATA	460	6	35	0	0	A_42_P799306	ENSRNOT00000015782	4465.12	217.971	2.704907e+001	7.701326e+000	125.5	53.5	1.238219e+001	0	0	0	0	0	0	25.8407	1	0	46.8651	55.8125
DATA	461	6	36	0	0	A_42_P726743	NM_001108985	4489.91	218.136	1.390711e+003	1.392592e+002	1426.5	52.5	1.283275e+001	0	0	0	0	0	0	1323.99	1	1	46.1809	52.375
DATA	462	6	37	0	0	A_44_P228341	NM_001025701	4515.24	218.543	2.863361e+003	2.864282e+002	2727	58	1.317029e+001	0	0	0	0	0	0	2715.89	1	1	47.2035	59.04
DATA	463	6	38	0	0	A_42_P571433	NM_031059	4540.84	218.766	1.425915e+004	1.425934e+003	13042	51	9.959277e+000	0	0	0	0	0	0	13471.2	1	1	49.5074	52.4828
DATA	464	6	39	0	0	A_44_P132783	NM_214833	4565.58	218.427	8.998300e+001	1.160053e+001	187	50	1.115623e+001	0	0	0	0	0	0	84.6633	1	1	65	52.6667
DATA	465	6	40	0	0	A_44_P119215	NM_001108941	4591.42	218.427	2.535139e+001	7.778456e+000	125	52	1.127676e+001	0	0	0	0	0	0	23.7478	1	0	65	52.6296
DATA	466	6	41	0	0	A_44_P124259	XM_345871	4616.83	218.455	2.964835e+001	7.959681e+000	130	46	1.025121e+001	0	0	0	0	0	0	27.6482	1	0	45.835	47.8286
DATA	467	6	42	0	0	A_44_P422063	NM_001107631	4642	218.455	1.174722e+002	1.389493e+001	212	55.5	1.055840e+001	0	0	0	0	0	0	109.043	1	1	55.8519	53.9375
DATA	468	6	43	0	0	A_44_P1033023	NM_013063	4667.63	218.397	9.187076e+003	9.187379e+002	8371.5	55	8.763626e+000	0	0	0	0	0	0	8486.6	1	1	48.5334	54.6364
DATA	469	6	44	0	0	A_64_P121618	NM_001134542	4692.88	218.333	2.968217e+002	3.061355e+001	381	51	7.542676e+000	0	0	0	0	0	0	272.846	1	1	45.835	49.0667
DATA	470	6	45	0	0	A_64_P042188	ENSRNOT00000034890	4718.63	218.5	1.017701e+004	1.017729e+003	9411	53	1.146438e+001	0	0	0	0	0	0	9307.33	1	1	52.3208	50.7429
DATA	471	6	46	0	0	A_42_P561616	AI234869	4743.94	218.768	7.888710e+002	7.924956e+001	802	52	1.565772e+001	0	0	0	0	0	0	717.777	1	1	46.5243	52.75
DATA	472	6	47	0	0	A_42_P588606	NM_001134544	4769	218.455	2.620339e+002	2.728626e+001	338	54	1.064592e+001	0	0	0	0	0	0	237.172	1	1	55.8519	52.9167
DATA	473	6	48	0	0	A_42_P568897	NM_001005563	4794.86	218.743	6.904737e+002	6.947008e+001	711	53	9.378932e+000	0	0	0	0	0	0	621.586	1	1	48.2044	51.3667
DATA	474	6	49	0	0	A_64_P096356	NM_012640	4820.13	218.314	2.349374e+004	2.349386e+003	20965	46.5	9.500352e+000	0	0	0	0	0	0	21034.4	1	1	47.2035	47.4706
DATA	475	6	50	0	0	A_64_P006418	A_64_P006418	4845.68	218.382	4.424949e+003	4.425626e+002	4326	49	1.494736e+001	0	0	0	0	0	0	3939.91	1	1	46.5243	51.9032
DATA	476	6	51	0	0	A_64_P156389	A_64_P156389	4870.89	218.685	8.441916e+001	1.147953e+001	173	44	1.256219e+001	0	0	0	0	0	0	74.7555	1	1	48.5334	47.6061
DATA	477	6	52	0	0	A_42_P576446	NM_001107673	4896.17	218.464	7.048750e+003	7.049184e+002	6068	45	1.535437e+001	0	0	0	0	0	0	6206.96	1	1	47.2035	50.44
DATA	478	6	53	0	0	A_64_P022804	A_64_P022804	4921.82	218.59	1.387400e+003	1.389629e+002	1295.5	54	1.158918e+001	0	0	0	0	0	0	1214.81	1	1	50.1463	53.9667
DATA	479	6	54	0	0	A_64_P162356	A_64_P162356	4947.1	218.875	1.372944e+004	1.372967e+003	11969	55.5	9.857195e+000	0	0	0	0	0	0	11954.7	1	1	46.8651	55.0833
DATA	480	6	55	0	0	A_44_P266776	NM_199388	4972.63	219	8.128825e+002	8.167668e+001	788	51	1.162496e+001	0	0	0	0	0	0	703.808	1	1	48.5334	51.8387
DATA	481	6	56	0	0	A_64_P035066	NM_001008960	4997.5	218.5	8.037608e+000	8.000916e+000	100	45	1.127398e+001	0	0	0	0	0	0	-2.77555	0	0	65	48.5556
DATA	482	6	57	0	0	A_64_P072728	NM_001100667	5023.12	218.662	9.133321e+003	9.133675e+002	7742	50	1.111569e+001	0	0	0	0	0	0	7819.22	1	1	45.4864	52.9615
DATA	483	6	58	0	0	A_64_P028446	NM_001106007	5048.56	218.521	3.332648e+003	3.333630e+002	2841	48	1.270918e+001	0	0	0	0	0	0	2837.13	1	1	48.2044	50.3438
DATA	484	6	59	0	0	A_44_P251212	NM_031715	5074.14	218.722	4.661767e+004	4.661774e+003	39049.5	53	8.623022e+000	0	0	0	0	0	0	39466.3	1	1	47.8731	54.6471
DATA	485	6	60	0	0	A_42_P818240	NM_001108334	5099.63	218.64	1.516467e+004	1.516490e+003	12556.5	48	8.369198e+000	0	0	0	0	0	0	12767.6	1	1	48.8603	48.0435
DATA	486	6	61	0	0	A_64_P023122	NM_001080208	5124.5	218.5	2.232956e+001	8.523379e+000	115.5	49	1.302537e+001	0	0	0	0	0	0	18.6998	1	0	57.5363	51.7813
DATA	487	6	62	0	0	A_44_P217821	NM_001107292	5149.89	218.5	3.267156e+002	3.370192e+001	363	56	1.059172e+001	0	0	0	0	0	0	272.149	1	1	56.9804	57.5938
DATA	488	6	63	0	0	A_64_P007372	NM_001105895	5175.42	218.573	8.351497e+000	8.315222e+000	104	47	9.734396e+000	0	0	0	0	0	0	1.45276	0	0	57.5363	47.0385
DATA	489	6	64	0	0	A_42_P792382	NM_017257	5201	218.729	9.998343e+003	9.998692e+002	8244	51	1.281821e+001	0	0	0	0	0	0	8242.23	1	1	46.8651	54.375
DATA	490	6	65	0	0	A_43_P12232	NM_022512	5226.76	218.573	2.880433e+003	2.881657e+002	2389	50.5	1.153815e+001	0	0	0	0	0	0	2362.4	1	1	52.6241	51.4286
DATA	491	6	66	0	0	A_64_P158475	A_64_P158475	5251.93	218.74	6.220697e+003	6.221269e+002	5160.5	60.5	1.640396e+001	0	0	0	0	1	0	5077.5	1	1	47.8731	60.1429
DATA	492	6	67	0	0	A_64_P043361	NM_001197023	5277.06	218.493	1.136366e+002	1.417866e+001	190	51.5	7.410699e+000	0	0	0	0	0	0	92.3162	1	1	46.1809	51.0385
DATA	493	6	68	0	0	A_64_P080851	NM_001105753	5302.42	218.573	1.237480e+001	8.607502e+000	109	51	1.125715e+001	0	0	0	0	0	0	10.0075	1	0	57.5363	52.16
DATA	494	6	69	0	0	A_44_P129330	NM_001107505	5328.11	219.273	2.246777e+003	2.248405e+002	1848	50	1.247962e+001	0	0	0	0	0	0	1809.17	1	1	45.835	52.4688
DATA	495	6	70	0	0	A_64_P008827	NM_001014012	5353.11	218.5	3.320075e+003	3.321187e+002	2650	56	1.246864e+001	0	0	0	0	0	0	2662.01	1	1	56.9804	55.5128
DATA	496	6	71	0	0	A_64_P026222	NM_001101019	5378.5	218.5	6.094956e+001	1.056187e+001	150	52	1.344144e+001	0	0	0	0	0	0	48.6743	1	1	65	51.1212
DATA	497	6	72	0	0	A_64_P067749	NM_012659	5404.62	218.975	4.372739e+004	4.372747e+003	35219	52	1.038123e+001	0	0	0	0	0	0	34788.9	1	1	49.8279	52.6452
DATA	498	6	73	0	0	A_44_P362981	NM_145878	5429.94	218.708	4.869098e+004	4.869106e+003	36952	54	1.002755e+001	0	0	0	0	0	0	38599.8	1	1	53.2255	55.1379
DATA	499	6	74	0	0	A_64_P146654	NM_031698	5455.27	218.701	2.907265e+003	2.908572e+002	2362	57.5	1.089870e+001	0	0	0	0	0	0	2297.21	1	1	49.8279	57.3333
DATA	500	6	75	0	0	A_42_P548800	NM_001007696	5480.7	218.9	7.427555e+003	7.428070e+002	5884.5	58	9.339140e+000	0	0	0	0	0	0	5851.5	1	1	47.2035	57.7667
DATA	501	6	76	0	0	A_44_P310581	BG673348	5505.75	218.627	4.838144e+003	4.838938e+002	3825	60	1.719199e+001	0	0	0	0	1	0	3801.05	1	1	49.1849	66.2424
DATA	502	6	77	0	0	A_64_P062269	XM_001067531	5531.07	218.901	2.184673e+002	2.354838e+001	272	61	1.102073e+001	0	0	0	0	0	0	171.228	1	1	46.8651	59.3514
DATA	503	6	78	66	1	DarkCorner	DarkCorner	5557.82	218.75	8.849429e+000	8.809032e+000	87	57	1.283581e+001	0	0	0	0	0	0	-13.7403	0	0	44.4243	57.3261
DATA	504	6	79	66	1	DarkCorner	DarkCorner	5581.58	218.573	8.864742e+000	8.824275e+000	80	50	1.307123e+001	0	0	0	0	0	0	-18.1331	0	0	57.5363	53.8571
DATA	505	6	80	66	1	DarkCorner	DarkCorner	5607.24	218.016	8.879000e+000	8.838469e+000	79.5	51	1.168426e+001	0	0	0	0	0	0	-18.7756	0	0	45.4864	51.6829
DATA	506	6	81	66	1	DarkCorner	DarkCorner	5632.5	218.648	8.887810e+000	8.847238e+000	83.5	47	9.855636e+000	0	0	0	0	0	0	-13.9576	0	0	57.5363	48.5238
DATA	507	6	82	66	1	DarkCorner	DarkCorner	5657.86	218.619	8.894581e+000	8.853978e+000	79	47	8.357401e+000	0	0	0	0	0	0	-16.6214	0	0	36.5637	46.3333
DATA	508	6	83	66	1	DarkCorner	DarkCorner	5683.42	218.573	8.897985e+000	8.857367e+000	78	45	7.627716e+000	0	0	0	0	0	0	-17.5037	0	0	57.5363	44.15
DATA	509	6	84	66	1	DarkCorner	DarkCorner	5709.69	218.629	8.897535e+000	8.856918e+000	81	46	9.660227e+000	0	0	0	0	0	0	-18.9627	0	0	47.5395	47.5952
DATA	510	6	85	66	1	DarkCorner	DarkCorner	5734.29	218.96	8.893018e+000	8.852422e+000	86	42	8.712875e+000	0	0	0	0	0	0	-9.91907	0	0	49.1849	42.3852
DATA	511	7	1	66	1	DarkCorner	DarkCorner	3588.39	225.069	7.774099e+000	7.738611e+000	90.5	45	9.804912e+000	0	0	0	0	0	0	-12.9036	0	0	65	46.3172
DATA	512	7	2	66	1	DarkCorner	DarkCorner	3613.5	225	7.705874e+000	7.670697e+000	86.5	47.5	9.504360e+000	0	0	0	0	0	0	-8.80082	0	0	54.1152	48.7895
DATA	513	7	3	66	1	DarkCorner	DarkCorner	3639.56	225.467	7.638802e+000	7.603932e+000	75	54	1.017939e+001	0	0	0	0	0	0	-26.8403	0	0	38.6789	55.2105
DATA	514	7	4	66	1	DarkCorner	DarkCorner	3664.5	225	7.579932e+000	7.545330e+000	81	50	1.116394e+001	0	0	0	0	0	0	-21.1692	0	0	54.1152	51.2432
DATA	515	7	5	66	1	DarkCorner	DarkCorner	3690.44	225.211	7.521929e+000	7.487592e+000	81	49.5	1.080605e+001	0	0	0	0	0	0	-22.5819	0	0	42.9674	46.9722
DATA	516	7	6	66	1	DarkCorner	DarkCorner	3715.91	225.698	7.468626e+000	7.434532e+000	78	52	8.652535e+000	0	0	0	0	0	0	-24.9684	0	0	41.0736	50.5405
DATA	517	7	7	66	1	DarkCorner	DarkCorner	3740.5	225	7.422141e+000	7.388260e+000	85.5	52.5	1.023219e+001	0	0	0	0	0	0	-18.897	0	0	65	52.7105
DATA	518	7	8	66	1	DarkCorner	DarkCorner	3766.09	225.412	7.376100e+000	7.342429e+000	81	53.5	1.178451e+001	0	0	0	0	0	0	-21.9529	0	0	50.4627	53.4333
DATA	519	7	9	0	0	A_64_P051297	NM_001107416	3791.7	225.224	5.711058e+003	5.711525e+002	5568.5	49	8.176284e+000	0	0	0	0	0	0	5388.58	1	1	45.835	50.4194
DATA	520	7	10	0	0	A_64_P162378	A_64_P162378	3816.58	225.427	7.371809e+004	7.371813e+003	69833	54	1.645130e+001	0	0	0	0	0	0	69914.5	1	1	57.5363	54.6129
DATA	521	7	11	0	0	A_64_P030634	ENSRNOT00000042606	3842.09	225.386	6.147067e+001	9.488792e+000	161.5	51.5	1.118642e+001	0	0	0	0	0	0	58.5802	1	1	57.259	51.3438
DATA	522	7	12	0	0	A_64_P110009	NM_024392	3867.75	225.373	1.288175e+004	1.288196e+003	12071	49	1.010022e+001	0	0	0	0	0	0	12330.3	1	1	49.1849	50.5581
DATA	523	7	13	0	0	A_42_P618145	NM_001080783	3893.19	225.622	4.819011e+003	4.819544e+002	4610	52.5	9.549056e+000	0	0	0	0	0	0	4631.13	1	1	49.1849	50.0938
DATA	525	7	15	0	0	A_64_P101770	NM_001000074	3943.58	225.427	7.153604e+000	7.151683e+000	109	49.5	8.894683e+000	0	0	0	0	0	0	6.40705	0	0	57.5363	49.3462
DATA	526	7	16	0	0	A_42_P735934	NM_001105729	3969.07	226.197	5.757055e+003	5.757493e+002	6034	50	1.117108e+001	0	0	0	0	0	0	5585.04	1	1	44.7812	50.6897
DATA	528	7	18	0	0	A_42_P718331	NM_133522	4020.38	225.37	1.804313e+003	1.805698e+002	1847	51	1.123457e+001	0	0	0	0	0	0	1757.85	1	1	50.7771	51.7083
DATA	529	7	19	0	0	A_64_P118054	NM_001037651	4045.42	225.427	7.219770e+000	7.096340e+000	109.5	56	1.147635e+001	0	0	0	0	0	0	7.04494	1	0	65	55.96
DATA	530	7	20	0	0	A_64_P044613	A_64_P044613	4070.58	225.427	7.313359e+004	7.313363e+003	71456	57	9.959704e+000	0	0	0	0	0	0	71449.4	1	1	57.5363	58.9355
DATA	531	7	21	0	0	A_43_P13241	NM_134334	4096.54	225.701	4.513908e+004	4.513913e+003	43742	55	1.144262e+001	0	0	0	0	0	0	44140.1	1	1	52.0157	57.1724
DATA	532	7	22	0	0	A_44_P524748	NM_001000712	4121.42	225.427	1.310857e+001	7.162115e+000	114	52	8.828108e+000	0	0	0	0	0	0	12.8245	1	0	65	52.25
DATA	533	7	23	0	0	A_64_P126797	ENSRNOT00000048363	4146.99	225.882	9.702796e+001	1.198744e+001	195	48	9.317193e+000	0	0	0	0	0	0	94.9476	1	1	46.8651	47.8857
DATA	535	7	25	0	0	A_42_P730411	NM_001012181	4197.95	225.671	9.465979e+002	9.492153e+001	1010	45	9.803263e+000	0	0	0	0	0	0	925.687	1	1	48.8603	47.1944
DATA	536	7	26	0	0	A_64_P049501	NM_001047970	4223	225.455	3.054476e+001	7.683135e+000	132	52.5	9.960208e+000	0	0	0	0	0	0	29.8459	1	0	55.8519	51.0333
DATA	537	7	27	0	0	A_42_P623688	NM_031031	4248.43	225.608	8.812975e+003	8.813257e+002	8442.5	50	1.117550e+001	0	0	0	0	0	0	8602	1	1	49.1849	49.2593
DATA	538	7	28	0	0	A_42_P601217	NM_053460	4273.58	225.427	1.308541e+002	1.487200e+001	226	51	8.897003e+000	0	0	0	0	0	0	127.542	1	1	57.5363	50.36
DATA	540	7	30	0	0	A_42_P791872	NM_001135174	4324.93	225.933	1.224103e+004	1.224123e+003	11554	50.5	1.176041e+001	0	0	0	0	0	0	11887.9	1	1	46.8651	52.7368
DATA	542	7	32	0	0	A_44_P557172	NM_177936	4375.42	225.427	5.137986e+001	8.786012e+000	152.5	53	8.117471e+000	0	0	0	0	0	0	49.6605	1	1	57.5363	51.68
DATA	543	7	33	0	0	A_64_P118812	NM_001000512	4401.25	225.067	7.180119e+000	7.147342e+000	99	58	9.781805e+000	0	0	0	0	0	0	-1.56795	0	0	44.0646	57.0606
DATA	544	7	34	0	0	A_64_P019425	NM_172035	4426.78	225.639	2.012643e+002	2.136491e+001	291	53	1.359903e+001	0	0	0	0	0	0	193.407	1	1	47.5395	54.1724
DATA	545	7	35	0	0	A_42_P726743	NM_001108985	4451.5	225.5	1.489678e+003	1.491413e+002	1492	50	1.463130e+001	0	0	0	0	0	0	1427.01	1	1	57.5363	53.3784
DATA	546	7	36	0	0	A_42_P558703	NM_001106810	4477.5	225.735	4.431387e+002	4.489760e+001	516.5	53.5	1.294470e+001	0	0	0	0	0	0	423.014	1	1	46.5243	54
DATA	547	7	37	0	0	A_42_P619806	TC590118	4502.68	225.74	8.905800e+002	8.935201e+001	933.5	58	1.217527e+001	0	0	0	0	0	0	847.055	1	1	48.2044	55.6522
DATA	548	7	38	0	0	A_64_P072247	XM_001055615	4527.67	225.5	4.073414e+001	8.333658e+000	143	52.5	8.224635e+000	0	0	0	0	0	0	38.5954	1	1	57.5363	52.2692
DATA	549	7	39	0	0	A_64_P104164	A_64_P104164	4553.5	226.273	3.490728e+004	3.490735e+003	33225	46	7.240010e+000	0	0	0	0	0	0	32941.6	1	1	46.5243	46.6818
DATA	550	7	40	0	0	A_42_P672103	NM_021770	4578.93	225.933	3.179943e+004	3.179951e+003	29328	52	1.071036e+001	0	0	0	0	0	0	29880.5	1	1	46.8651	51.3871
DATA	551	7	41	0	0	A_64_P090942	NM_001000406	4603.89	225.5	7.396928e+000	7.392858e+000	109	51	1.132008e+001	0	0	0	0	0	0	6.19305	0	0	56.9804	49.7188
DATA	552	7	42	0	0	A_64_P149491	ENSRNOT00000025458	4630.04	225.493	8.609073e+001	1.135097e+001	180	49	1.210871e+001	0	0	0	0	0	0	80.1639	1	1	48.5334	49.4359
DATA	553	7	43	0	0	A_42_P552441	NR_002704	4655.06	225.768	2.614111e+004	2.614122e+003	24000	56.5	1.012964e+001	0	0	0	0	0	0	24229.5	1	1	46.5243	55.175
DATA	554	7	44	0	0	A_64_P060419	ENSRNOT00000055060	4680.11	225.5	7.502238e+000	7.467991e+000	94	52	9.450545e+000	0	0	0	0	0	0	-8.98772	0	0	56.9804	52.7931
DATA	555	7	45	0	0	A_44_P161233	NM_019165	4705.64	226.258	1.165075e+003	1.167490e+002	1128	51	1.012876e+001	0	0	0	0	0	0	1069.42	1	1	46.1809	49.9474
DATA	556	7	46	66	-1	(-)3xSLv1	NegativeControl	4730.89	225.5	7.578234e+000	7.543640e+000	85	48	1.294592e+001	0	0	0	0	0	0	-15.8099	0	0	56.9804	48.3947
DATA	557	7	47	0	0	A_43_P12519	NM_031114	4756.39	226.129	1.318365e+004	1.318387e+003	11804	55.5	1.582719e+001	0	0	0	0	0	0	11977.1	1	1	47.2035	55.125
DATA	558	7	48	0	0	A_44_P317600	NM_012612	4781.91	226.328	4.821786e+002	4.881668e+001	528.5	54.5	1.196768e+001	0	0	0	0	0	0	435.738	1	1	45.1352	55.5556
DATA	559	7	49	0	0	A_64_P034166	A_64_P034166	4807.11	225.5	7.699624e+000	7.664476e+000	99	49.5	1.040776e+001	0	0	0	0	0	0	-3.78941	0	0	56.9804	50.1071
DATA	560	7	50	0	0	A_64_P024585	NM_001109337	4832.5	225.5	7.741728e+000	7.706387e+000	92	49	1.155623e+001	0	0	0	0	0	0	-7.8159	0	0	65	50.1892
DATA	561	7	51	0	0	A_42_P654682	NM_012724	4857.89	225.5	1.806586e+001	7.956798e+000	116.5	43	8.163427e+000	0	0	0	0	0	0	16.0599	1	0	65	42.1923
DATA	562	7	52	0	0	A_42_P524610	NM_001108992	4883.63	226	3.409343e+003	3.410233e+002	3017	44	1.056283e+001	0	0	0	0	0	0	3013.98	1	1	48.5334	47.36
DATA	563	7	53	0	0	A_64_P046677	NM_020093	4908.58	225.573	7.871628e+000	7.836278e+000	102	50	1.443838e+001	0	0	0	0	0	0	0.840272	0	0	57.5363	49.7188
DATA	564	7	54	0	0	A_64_P042742	XM_001061779	4934	225.545	4.058916e+002	4.134699e+001	461.5	53	8.483391e+000	0	0	0	0	0	0	354.826	1	1	55.8519	53.8235
DATA	565	7	55	0	0	A_64_P058430	ENSRNOT00000062073	4959.5	225.648	2.441668e+001	8.292161e+000	124	51	1.053831e+001	0	0	0	0	0	0	21.2247	1	0	65	52.4516
DATA	566	7	56	0	0	A_42_P479251	NM_001108686	4985.37	226.265	1.083243e+004	1.083272e+003	9236	52	1.103153e+001	0	0	0	0	0	0	9363.37	1	1	46.5243	51.7
DATA	567	7	57	0	0	A_42_P777329	NM_001106943	5010.43	226.29	6.212086e+002	6.263561e+001	616	58	1.460498e+001	0	0	0	0	0	0	533.994	1	1	46.8651	57.6552
DATA	568	7	58	0	0	A_64_P103414	NM_001106472	5035.58	225.573	8.096097e+000	8.059139e+000	93.5	57.5	1.361554e+001	0	0	0	0	0	0	-8.08816	0	0	57.5363	56.6875
DATA	569	7	59	0	0	A_64_P082164	A_64_P082164	5061	225.545	8.211611e+001	1.153724e+001	172	55.5	1.106560e+001	0	0	0	0	0	0	69.7991	1	1	65	55.9375
DATA	570	7	60	0	0	A_42_P702729	NM_001107557	5086.5	225.648	2.417812e+003	2.419184e+002	2083	52.5	9.351173e+000	0	0	0	0	0	0	2043.85	1	1	57.5363	51.5
DATA	571	7	61	0	0	A_64_P130922	A_64_P130922	5111.58	225.573	5.128896e+002	5.193923e+001	532.5	48	9.335813e+000	0	0	0	0	0	0	431.229	1	1	57.5363	47.25
DATA	572	7	62	0	0	A_42_P509843	NM_001100480	5137.42	225.573	6.602377e+002	6.653571e+001	638	53.5	1.047942e+001	0	0	0	0	0	0	552.092	1	1	57.5363	52.3056
DATA	573	7	63	0	0	A_64_P110759	A_64_P110759	5162.5	225.648	2.908180e+001	8.776714e+000	129	48	8.810606e+000	0	0	0	0	0	0	24.1921	1	0	57.5363	50.3704
DATA	574	7	64	0	0	A_64_P006235	A_64_P006235	5188.4	226.347	6.468328e+002	6.521665e+001	637.5	47	8.172634e+000	0	0	0	0	0	0	535.309	1	1	47.5395	46.6333
DATA	575	7	65	0	0	A_44_P506064	NM_001191778	5213.5	225.648	3.240448e+001	8.972115e+000	129	48.5	9.067800e+000	0	0	0	0	0	0	26.6803	1	0	65	47.925
DATA	576	7	66	0	0	A_64_P075425	A_64_P075425	5239.29	226.167	1.231225e+004	1.231253e+003	10057	54	1.188781e+001	0	0	0	0	0	0	10087.6	1	1	45.835	53.4848
DATA	577	7	67	0	0	A_42_P544898	NM_001108279	5264.77	225.719	4.758181e+001	9.696605e+000	136	50	1.226283e+001	0	0	0	0	0	0	38.7945	1	1	45.1352	51.2424
DATA	578	7	68	0	0	A_44_P837192	ENSRNOT00000038251	5290.4	226.013	8.526939e+000	8.508951e+000	106	50.5	8.536871e+000	0	0	0	0	0	0	4.84132	0	0	49.1849	50.1333
DATA	580	7	70	0	0	A_44_P325657	NM_001014007	5340.83	226	1.417350e+002	1.655885e+001	214	50	9.341601e+000	0	0	0	0	0	0	114.033	1	1	46.8651	49.1
DATA	581	7	71	0	0	A_64_P004598	ENSRNOT00000024034	5366.17	226.04	3.133111e+002	3.248914e+001	352	52.5	1.263765e+001	0	0	0	0	0	0	251.053	1	1	47.8731	52.2619
DATA	582	7	72	0	0	A_42_P607183	XM_001081723	5391.36	226.13	1.746127e+003	1.748258e+002	1478	49	1.289179e+001	0	0	0	0	0	0	1393.82	1	1	46.8651	50.4857
DATA	584	7	74	0	0	A_42_P589190	NM_023104	5442	226	9.416482e+002	9.456503e+001	841	51	9.925312e+000	0	0	0	0	0	0	746.378	1	1	54.9904	52.6129
DATA	585	7	75	0	0	A_42_P757323	TC587630	5467.44	226.028	4.961038e+003	4.961804e+002	3919	55	1.002198e+001	0	0	0	0	0	0	3919.91	1	1	48.2044	55.24
DATA	586	7	76	0	0	A_42_P688320	NM_001108569	5492.5	226	3.400197e+002	3.510804e+001	366	60	1.243761e+001	0	0	0	0	1	0	267.899	1	1	65	62.2
DATA	587	7	77	0	0	A_44_P224705	NM_031002	5518.5	226	1.055801e+002	1.372294e+001	182	66	1.794916e+001	0	0	0	0	1	0	82.9653	1	1	54.1152	67.3793
DATA	588	7	78	0	0	A_42_P481849	NM_001100563	5543.78	226.11	2.179284e+003	2.181054e+002	1730	54	1.259183e+001	0	0	0	1	0	0	1708.63	1	1	47.8731	57.5745
DATA	589	7	79	66	1	DarkCorner	DarkCorner	5569	226	8.843910e+000	8.803538e+000	79	48.5	8.260466e+000	0	0	0	0	0	0	-19.2424	0	0	54.9904	48.6471
DATA	590	7	80	66	1	DarkCorner	DarkCorner	5595.52	226.977	8.857334e+000	8.816901e+000	88	50	1.211840e+001	0	0	0	0	0	0	-9.00896	0	0	37.4241	51.6889
DATA	591	7	81	66	1	DarkCorner	DarkCorner	5619.5	226	8.869936e+000	8.829446e+000	78	46.5	1.173139e+001	0	0	0	0	0	0	-17.5624	0	0	54.1152	49.4444
DATA	592	7	82	66	1	DarkCorner	DarkCorner	5646.07	225.966	8.878712e+000	8.838181e+000	81	45	9.130320e+000	0	0	0	0	0	0	-19.5698	0	0	43.7019	47.0294
DATA	593	7	83	66	1	DarkCorner	DarkCorner	5670.5	226	8.883443e+000	8.842891e+000	78.5	46	1.023622e+001	0	0	0	0	0	0	-19.1477	0	0	54.1152	45.2368
DATA	594	7	84	66	1	DarkCorner	DarkCorner	5696.37	225.983	8.885041e+000	8.844481e+000	81	45	8.732747e+000	0	0	0	0	0	0	-14.8927	0	0	43.3362	45.3043
DATA	595	7	85	66	1	DarkCorner	DarkCorner	5721.5	226.352	8.882311e+000	8.841764e+000	86	45	8.120362e+000	0	0	0	0	0	0	-12.4471	0	0	57.5363	44.6176
DATA	596	8	1	66	1	DarkCorner	DarkCorner	3601.44	232.73	7.727100e+000	7.691827e+000	84.5	49	8.652858e+000	0	0	0	0	0	0	-16.4192	0	0	44.0646	49.6829
DATA	597	8	2	66	1	DarkCorner	DarkCorner	3626.62	232.86	7.661092e+000	7.626120e+000	80	50	1.111645e+001	0	0	0	0	0	0	-18.0119	0	0	39.8942	50.963
DATA	598	8	3	66	1	DarkCorner	DarkCorner	3651.5	232.5	7.600580e+000	7.565884e+000	79	49	1.524348e+001	0	0	0	0	0	0	-22.7924	0	0	57.5363	52
DATA	599	8	4	66	1	DarkCorner	DarkCorner	3677.55	232.821	7.540484e+000	7.506062e+000	76.5	50	9.456127e+000	0	0	0	0	0	0	-27.8542	0	0	42.9674	49.4688
DATA	600	8	5	66	1	DarkCorner	DarkCorner	3703.05	233.055	7.485808e+000	7.451636e+000	86	52	7.155267e+000	0	0	0	0	0	0	-15.928	0	0	42.2201	50.7419
DATA	601	8	6	66	1	DarkCorner	DarkCorner	3728.18	233.065	7.435980e+000	7.402035e+000	84	50.5	8.502300e+000	0	0	0	0	0	0	-19.7781	0	0	45.1352	50.6136
DATA	602	8	7	66	1	DarkCorner	DarkCorner	3753.92	233.446	7.388248e+000	7.354521e+000	84.5	54	1.046028e+001	0	0	0	0	0	0	-15.4482	0	0	44.7812	53.8378
DATA	603	8	8	0	0	A_44_P487081	NM_001033951	3778.5	232.5	7.516247e+002	7.551749e+001	814.5	50.5	9.667872e+000	0	0	0	0	0	0	707.902	1	1	57.5363	51.875
DATA	604	8	9	0	0	A_64_P054403	NM_001170340	3803.89	232.5	1.796984e+002	1.938642e+001	270	48	8.069856e+000	0	0	0	0	0	0	170.165	1	1	56.9804	47.5484
DATA	605	8	10	0	0	A_44_P665685	NM_001109325	3829.5	232.5	7.271229e+000	7.238036e+000	96	51.5	1.333057e+001	0	0	0	0	0	0	-3.81063	0	0	57.5363	52.5882
DATA	606	8	11	0	0	A_42_P531684	NM_001014215	3855.02	233.03	3.288205e+002	3.366206e+001	411.5	49	9.988050e+000	0	0	0	0	0	0	314.402	1	1	46.8651	50.7692
DATA	607	8	12	0	0	A_42_P722904	ENSRNOT00000006525	3880.43	233.262	2.792144e+003	2.793066e+002	2673	52.5	8.063327e+000	0	0	0	0	0	0	2680.85	1	1	45.835	51.5
DATA	608	8	13	0	0	A_42_P514057	NM_031839	3905.5	232.5	7.181745e+000	7.151748e+000	108	49	1.067180e+001	0	0	0	0	0	0	1.9237	0	0	65	48.3714
DATA	609	8	14	0	0	A_64_P087459	A_64_P087459	3931.26	232.815	9.999284e+004	9.999287e+003	97307	54	9.405558e+000	0	0	0	0	0	0	96679.1	1	1	50.7771	54.2581
DATA	610	8	15	0	0	A_42_P581060	NM_001108722	3956.43	233.29	1.360955e+004	1.360974e+003	12940	50	1.288260e+001	0	0	0	0	0	0	13197.4	1	1	46.8651	50.8065
DATA	611	8	16	0	0	A_42_P658220	NM_001109598	3982	233.226	2.497749e+003	2.498754e+002	2515	50	8.965575e+000	0	0	0	0	0	0	2428.24	1	1	45.4864	47.6923
DATA	612	8	17	0	0	A_42_P758454	NM_001108101	4007.37	232.957	2.958118e+002	3.041452e+001	390	48	1.236145e+001	0	0	0	0	0	0	288.185	1	1	46.8651	48.3448
DATA	613	8	18	0	0	A_64_P140956	NM_001013141	4032.7	232.9	6.411012e+002	6.449752e+001	701	51.5	9.021342e+000	0	0	0	0	0	0	625.668	1	1	47.2035	50.7692
DATA	614	8	19	0	0	A_42_P508984	NM_001007729	4057.89	232.5	6.581297e+002	6.618939e+001	768.5	57	1.044834e+001	0	0	0	0	0	0	643.147	1	1	56.9804	55.7333
DATA	615	8	20	0	0	A_42_P619008	NM_001013079	4083.57	232.897	6.093645e+003	6.094052e+002	5907	57	1.155492e+001	0	0	0	0	0	0	5961.45	1	1	46.5243	57.129
DATA	616	8	21	0	0	A_64_P058351	NM_017101	4108.58	232.573	8.620514e+004	8.620517e+003	84939	52	9.454134e+000	0	0	0	0	0	0	84388.7	1	1	57.5363	52.2258
DATA	617	8	22	0	0	A_64_P083800	XM_001058776	4134.36	233.318	1.031763e+002	1.248710e+001	199	48	1.177276e+001	0	0	0	0	0	0	101.046	1	1	45.835	50.2581
DATA	618	8	23	0	0	A_64_P028088	NM_001106073	4160.01	233.328	6.054849e+002	6.095567e+001	693	49	1.026284e+001	0	0	0	0	0	0	592.985	1	1	45.835	49.2973
DATA	619	8	24	0	0	A_44_P105441	ENSRNOT00000042202	4185.2	233.307	1.419967e+004	1.419985e+003	13838	49	9.500710e+000	0	0	0	0	0	0	13902	1	1	48.2044	48.2778
DATA	620	8	25	0	0	A_42_P675802	NM_145777	4210.71	233.167	2.772619e+003	2.773513e+002	2750	50.5	1.197131e+001	0	0	0	0	0	0	2712.7	1	1	45.835	50.1429
DATA	621	8	26	0	0	A_64_P018525	ENSRNOT00000027134	4235.58	232.573	3.585034e+002	3.653652e+001	447	51.5	1.077892e+001	0	0	0	0	0	0	350.406	1	1	57.5363	51.4333
DATA	622	8	27	0	0	A_42_P749382	NM_001106731	4261.3	233.284	1.095003e+004	1.095025e+003	10510.5	50.5	1.134984e+001	0	0	0	0	0	0	10690	1	1	46.1809	50.3214
DATA	623	8	28	0	0	A_44_P316364	NM_001077675	4286.5	232.648	7.099829e+000	7.067419e+000	98	51.5	1.319442e+001	0	0	0	0	0	0	-4.3276	0	0	57.5363	52.1875
DATA	624	8	29	0	0	A_64_P143596	ENSRNOT00000060139	4311.86	232.593	1.099671e+002	1.307895e+001	211	48	1.126461e+001	0	0	0	0	0	0	106.988	1	1	56.9804	50.6744
DATA	625	8	30	0	0	A_42_P468723	NM_001191689	4337.17	232.9	7.545555e+002	7.578837e+001	804.5	54	1.170204e+001	0	0	0	0	0	0	732.61	1	1	46.8651	55.0571
DATA	626	8	31	0	0	A_42_P533792	NM_001106575	4362.85	233.426	1.273618e+004	1.273638e+003	12036	53	9.358394e+000	0	0	0	0	0	0	12337	1	1	46.5243	51.7273
DATA	627	8	32	0	0	A_43_P16773	XM_217313	4388.38	233.344	4.498042e+002	4.554206e+001	546	53	8.118742e+000	0	0	0	0	0	0	434.556	1	1	45.1352	52.7742
DATA	628	8	33	0	0	A_42_P765830	NM_001106426	4413.78	233.154	2.193297e+004	2.193308e+003	20965	58	1.197565e+001	0	0	0	0	0	0	21128.3	1	1	45.835	56.0882
DATA	629	8	34	0	0	A_43_P15073	ENSRNOT00000030771	4438.95	233.062	1.032942e+002	1.257572e+001	202	59	2.004656e+001	0	0	0	0	1	0	99.1982	1	1	46.8651	59.7419
DATA	630	8	35	0	0	A_42_P538527	NM_001108885	4464.72	233.029	6.763255e+002	6.801443e+001	701	50.5	1.300213e+001	0	0	0	0	0	0	647.315	1	1	46.1809	51.9063
DATA	631	8	36	0	0	A_64_P037130	A_64_P037130	4489.5	232.648	7.255669e+000	7.222548e+000	85	53	1.386254e+001	0	0	0	0	0	0	-12.4455	0	0	57.5363	53.5217
DATA	632	8	37	0	0	A_44_P536115	NM_023957	4515.49	233.429	4.485603e+003	4.486188e+002	4274	54.5	1.096877e+001	0	0	0	0	0	0	4262.21	1	1	46.8651	51.0769
DATA	633	8	38	0	0	A_43_P11800	NM_017059	4540.5	232.648	2.239703e+002	2.355004e+001	313	50.5	1.409744e+001	0	0	0	0	0	0	211.97	1	1	57.5363	52.6875
DATA	634	8	39	0	0	A_64_P004922	NM_001191924	4565.61	232.931	2.596222e+003	2.597250e+002	2430.5	50	9.995237e+000	0	0	0	0	0	0	2447.19	1	1	53.8203	51.1429
DATA	635	8	40	0	0	A_64_P145058	NM_001107951	4591.5	233	1.065696e+003	1.068221e+002	1089	50	1.094255e+001	0	0	0	0	0	0	1000.13	1	1	54.1152	49.9643
DATA	636	8	41	0	0	A_64_P075372	A_64_P075372	4616.3	233.333	2.311608e+001	7.725910e+000	124.5	51	1.445389e+001	0	0	0	0	0	0	21.6002	1	0	44.4243	51.9231
DATA	637	8	42	0	0	A_64_P118792	NM_001107034	4642	233	1.343859e+001	7.527811e+000	117	53.5	1.023141e+001	0	0	0	0	0	0	12.4982	1	0	65	52.5
DATA	638	8	43	0	0	A_42_P469685	NM_001100532	4667.79	233.194	3.785541e+003	3.786273e+002	3588	55	8.461491e+000	0	0	0	0	0	0	3503.71	1	1	47.5395	54.9444
DATA	639	8	44	0	0	A_42_P759822	NM_001109673	4692.88	233.061	6.977946e+002	7.017911e+001	741	49.5	9.650130e+000	0	0	0	0	0	0	642.711	1	1	46.5243	49.8125
DATA	640	8	45	0	0	A_64_P014687	NM_012650	4718.62	233.397	1.255404e+004	1.255427e+003	12166	52	1.234800e+001	0	0	0	0	0	0	11504.8	1	1	45.1352	50.8387
DATA	641	8	46	0	0	A_43_P18505	NM_001012010	4743.94	233.116	7.501956e+001	1.064744e+001	169	52	1.330474e+001	0	0	0	0	0	0	68.3957	1	1	46.8651	50.875
DATA	642	8	47	0	0	A_43_P12580	NM_031548	4769	233	1.280221e+002	1.488557e+001	215	47	1.228602e+001	0	0	0	0	0	0	116.115	1	1	65	51.2286
DATA	643	8	48	0	0	A_64_P052980	NM_001014786	4794.5	233	7.670708e+000	7.670568e+000	109	57	1.138403e+001	0	0	0	0	0	0	6.59149	0	0	54.1152	57.8966
DATA	644	8	49	0	0	A_64_P397764	ENSRNOT00000028709	4819.5	233	4.280125e+002	4.348418e+001	489	51	9.175232e+000	0	0	0	0	0	0	384.085	1	1	54.1152	52.1429
DATA	645	8	50	0	0	A_64_P048408	NM_001008858	4845.69	233.134	1.062694e+002	1.313488e+001	191	47	1.189587e+001	0	0	0	0	0	0	94.8286	1	1	45.835	49.3871
DATA	647	8	52	0	0	A_64_P059500	ENSRNOT00000043917	4896	233	7.840852e+000	7.805060e+000	90	45	1.154377e+001	0	0	0	0	0	0	-13.1905	0	0	54.9904	46.5172
DATA	648	8	53	0	0	A_64_P220198	AW917371	4922.28	233.486	9.183673e+000	7.903318e+000	107	50	1.165918e+001	0	0	0	0	0	0	8.05913	1	0	47.2035	48.8974
DATA	649	8	54	0	0	A_64_P109764	NM_001007756	4947.03	233.408	3.753025e+002	3.835124e+001	426.5	54.5	9.915148e+000	0	0	0	0	0	0	327.546	1	1	47.2035	54.5882
DATA	650	8	55	0	0	A_64_P142685	NM_001130498	4972.39	233.069	8.370739e+000	7.981782e+000	110	53	1.488101e+001	0	0	0	0	0	0	7.26431	1	0	53.8203	56.5
DATA	651	8	56	0	0	A_44_P395709	NM_134366	4997.5	233	1.205925e+003	1.208564e+002	1129	62.5	1.553747e+001	0	0	0	0	1	0	1040.73	1	1	54.1152	62.25
DATA	652	8	57	0	0	A_64_P165071	NM_001110165	5023.46	233.386	1.471999e+004	1.472021e+003	12566	51	1.488498e+001	0	0	0	0	0	0	12631.9	1	1	47.5395	56
DATA	653	8	58	0	0	A_64_P009147	ENSRNOT00000042587	5048.97	233.42	6.021183e+001	1.007051e+001	153	56	1.194405e+001	0	0	0	0	0	0	51.3829	1	1	46.8651	55.7188
DATA	654	8	59	0	0	A_42_P647072	NM_178102	5074	233.079	1.691138e+003	1.693085e+002	1499	53	1.113265e+001	0	0	0	0	0	0	1435.25	1	1	45.4864	54.6897
DATA	655	8	60	0	0	A_64_P125585	XM_001063000	5099.37	233.404	1.581452e+001	8.312464e+000	112	51	1.042775e+001	0	0	0	0	0	0	13.3494	1	0	57.8122	49.8125
DATA	656	8	61	0	0	A_42_P610317	NM_001108225	5124.75	233.373	8.803105e+003	8.803487e+002	6986	52	1.108409e+001	0	0	0	0	0	0	7390.91	1	1	49.1849	52.2857
DATA	657	8	62	0	0	A_42_P755831	NM_152935	5150.38	233.477	2.955277e+004	2.955289e+003	23900	54	1.009060e+001	0	0	0	0	0	0	24679.8	1	1	52.9257	52.6571
DATA	659	8	64	0	0	A_44_P386375	NM_053842	5200.58	233.427	5.300594e+002	5.365701e+001	543	47.5	9.605075e+000	0	0	0	0	0	0	438.16	1	1	65	46.8667
DATA	660	8	65	0	0	A_43_P15565	NM_023953	5226.63	233.571	8.885564e+000	8.422850e+000	105.5	50	1.129436e+001	0	0	0	0	0	0	7.30777	1	0	47.8731	52
DATA	661	8	66	0	0	A_42_P456701	NM_001009697	5251.8	232.983	1.570574e+003	1.572828e+002	1385	51	1.139203e+001	0	0	0	0	0	0	1285.36	1	1	44.0646	49.8182
DATA	662	8	67	0	0	A_43_P20388	ENSRNOT00000061333	5277.46	233.386	1.414756e+003	1.417281e+002	1197.5	49	6.804015e+000	0	0	0	0	0	0	1152.44	1	1	47.5395	48.8065
DATA	663	8	68	0	0	A_44_P572504	TC585660	5302.99	233.391	4.702121e+002	4.778244e+001	487	49.5	1.080760e+001	0	0	0	0	0	0	381.287	1	1	46.8651	50.2857
DATA	664	8	69	0	0	A_64_P059964	NM_001013858	5327.86	233.5	4.215075e+003	4.215938e+002	3422	50	1.150658e+001	0	0	0	0	0	0	3403.44	1	1	47.8731	50.4828
DATA	665	8	70	0	0	A_44_P1056293	ENSRNOT00000022862	5353.05	233.477	2.248090e+003	2.249722e+002	1891	53	1.131207e+001	0	0	0	0	0	0	1807.71	1	1	65	52.4762
DATA	666	8	71	0	0	A_64_P133276	NM_001107464	5378.73	233.716	7.005105e+002	7.057707e+001	640.5	49	1.413327e+001	0	0	0	0	0	0	561.058	1	1	48.8603	49.027
DATA	667	8	72	0	0	A_42_P667782	NM_001009673	5404.09	233.896	1.684569e+003	1.686780e+002	1413	48	1.171049e+001	0	0	0	1	0	0	1344.23	1	1	46.8651	48.7241
DATA	668	8	73	0	0	A_64_P023624	A_64_P023624	5429.61	233.362	4.183716e+002	4.272488e+001	431	50	8.030587e+000	0	0	0	0	0	0	332.634	1	1	47.5395	48.9032
DATA	669	8	74	0	0	A_64_P110130	NM_001106172	5455.16	233.629	5.794005e+002	5.858842e+001	559	54	1.266602e+001	0	0	0	0	0	0	459.177	1	1	44.0646	56.8065
DATA	670	8	75	0	0	A_64_P087728	XM_001078778	5480.11	233.5	2.101658e+002	2.275305e+001	264.5	58	1.203475e+001	0	0	0	0	0	0	166.062	1	1	56.9804	57.9091
DATA	671	8	76	0	0	A_44_P475356	NM_001177823	5505.5	233.5	1.864380e+002	2.059155e+001	245	60	1.178193e+001	0	0	0	0	1	0	146.912	1	1	57.5363	60.7692
DATA	672	8	77	0	0	A_42_P560984	NM_001109179	5531.24	233.542	1.838342e+004	1.838363e+003	13767	59.5	1.524210e+001	0	0	0	0	0	0	14450.4	1	1	47.8731	58.8077
DATA	673	8	78	0	0	A_42_P566906	NM_001006966	5556.48	233.648	5.015884e+003	5.016653e+002	3925	52	1.016813e+001	0	0	0	0	0	0	3934.52	1	1	47.8731	53.1163
DATA	674	8	79	66	1	DarkCorner	DarkCorner	5581.58	233.427	8.838292e+000	8.797946e+000	79	49	1.108825e+001	0	0	0	0	0	0	-21.0581	0	0	57.5363	51.7222
DATA	675	8	80	66	1	DarkCorner	DarkCorner	5607.6	233.824	8.850932e+000	8.810528e+000	79	50	1.449820e+001	0	0	0	0	0	0	-19.6305	0	0	46.8651	52.7419
DATA	676	8	81	66	1	DarkCorner	DarkCorner	5632.71	234.066	8.860292e+000	8.819846e+000	83	45	1.022671e+001	0	0	0	0	0	0	-15.7143	0	0	44.0646	47.2553
DATA	677	8	82	66	1	DarkCorner	DarkCorner	5657.67	233.5	8.867900e+000	8.827419e+000	79	44	7.341595e+000	0	0	0	0	0	0	-21.8947	0	0	57.5363	44.4483
DATA	678	8	83	66	1	DarkCorner	DarkCorner	5683.33	233.5	8.871271e+000	8.830774e+000	73	43	1.011532e+001	0	0	0	0	0	0	-21.9994	0	0	65	44.8163
DATA	679	8	84	66	1	DarkCorner	DarkCorner	5709.91	233.429	8.871088e+000	8.830592e+000	83	46.5	8.265630e+000	0	0	0	0	0	0	-16.7168	0	0	42.9674	45.7222
DATA	680	8	85	66	1	DarkCorner	DarkCorner	5734.35	234	8.866239e+000	8.825765e+000	83	42	8.715278e+000	0	0	0	0	0	0	-13.4758	0	0	48.5334	42.0521
DATA	681	9	1	66	1	DarkCorner	DarkCorner	3588.49	240.045	7.751994e+000	7.716606e+000	94	46	9.319766e+000	0	0	0	0	0	0	-11.6614	0	0	46.1809	46.0499
DATA	682	9	2	66	1	DarkCorner	DarkCorner	3613.86	240.047	7.683923e+000	7.648847e+000	80.5	53	8.120531e+000	0	0	0	0	0	0	-20.2395	0	0	45.835	52.4074
DATA	683	9	3	66	1	DarkCorner	DarkCorner	3638.95	239.523	7.621481e+000	7.586689e+000	78	48	1.386713e+001	0	0	0	0	0	0	-23.6442	0	0	55.8519	50.8788
DATA	684	9	4	66	1	DarkCorner	DarkCorner	3665.08	240.2	7.559076e+000	7.524570e+000	80.5	50.5	1.195079e+001	0	0	0	0	0	0	-23.5337	0	0	39.4933	51.25
DATA	685	9	5	66	1	DarkCorner	DarkCorner	3690.2	240.527	7.503529e+000	7.469276e+000	83	53	7.237447e+000	0	0	0	0	0	0	-18.3229	0	0	42.2201	53.2258
DATA	686	9	6	66	1	DarkCorner	DarkCorner	3715.09	239.614	7.453704e+000	7.419678e+000	78	46.5	9.137639e+000	0	0	0	0	0	0	-24.8508	0	0	57.259	46.7368
DATA	687	9	7	66	1	DarkCorner	DarkCorner	3741.1	239.934	7.403921e+000	7.370123e+000	83	52	1.154792e+001	0	0	0	0	0	0	-19.4546	0	0	44.7812	52.0811
DATA	688	9	8	0	0	A_44_P195306	NM_019377	3766.15	240.426	3.201949e+004	3.201957e+003	28772	51.5	9.586697e+000	0	0	0	0	0	0	30108.5	1	1	46.5243	51.8571
DATA	689	9	9	0	0	A_44_P653240	NM_001202552	3791.62	240.348	1.000456e+003	1.003104e+002	998.5	48	9.194903e+000	0	0	0	0	0	0	946.034	1	1	45.835	48.7097
DATA	690	9	10	0	0	A_64_P012778	ENSRNOT00000038310	3816.66	240.279	7.281127e+000	7.256367e+000	103	51	1.553660e+001	0	0	0	0	0	0	3.33283	0	0	46.1809	52.9688
DATA	691	9	11	0	0	A_43_P11430	NM_001130503	3842.42	240.216	3.345796e+002	3.422668e+001	418.5	52	1.109250e+001	0	0	0	0	0	0	319.522	1	1	48.2044	52.1081
DATA	692	9	12	0	0	A_44_P225353	NM_001009678	3868	240.424	6.923123e+002	6.960274e+001	744	50	9.036332e+000	0	0	0	0	0	0	664.051	1	1	45.4864	51.697
DATA	693	9	13	0	0	A_64_P055231	NM_001106620	3893.14	240.281	9.743422e+002	9.769652e+001	1021	52.5	1.170268e+001	0	0	0	0	0	0	938.164	1	1	45.4864	50.3235
DATA	694	9	14	0	0	A_42_P540950	NM_001009541	3918.42	239.573	1.272160e+003	1.274157e+002	1350	49	9.716863e+000	0	0	0	0	0	0	1229.08	1	1	57.5363	48.1622
DATA	695	9	15	0	0	A_64_P135888	ENSRNOT00000029916	3943.5	239.648	7.140778e+000	7.108804e+000	103	54	1.299876e+001	0	0	0	0	0	0	0.911822	0	0	57.5363	52.5
DATA	696	9	16	0	0	A_64_P086448	NM_001008819	3969.09	239.935	6.976966e+001	9.946152e+000	173	51	1.070327e+001	0	0	0	0	0	0	67.8011	1	1	54.4085	49.32
DATA	697	9	17	0	0	A_42_P701779	NM_001108048	3994.5	240.056	2.219775e+003	2.220901e+002	2117.5	49	9.450835e+000	0	0	0	0	0	0	2162.18	1	1	48.5334	47.4194
DATA	698	9	18	0	0	A_44_P409965	ENSRNOT00000036078	4020.4	239.914	3.383923e+001	7.827486e+000	135	50	1.062806e+001	0	0	0	0	0	0	33.0258	1	0	42.9674	51.7931
DATA	699	9	19	0	0	A_44_P474037	NM_052807	4045.77	240.014	1.691855e+002	1.832756e+001	267	55	1.015268e+001	0	0	0	0	0	0	165.379	1	1	47.8731	54
DATA	700	9	20	0	0	A_64_P156985	NM_001000385	4070.77	239.867	7.071202e+000	7.038922e+000	97.5	58	9.643651e+000	0	0	0	0	0	0	-4.66212	0	0	48.2044	59
DATA	701	9	21	0	0	A_42_P635228	NM_001107651	4096	240	5.068553e+001	8.668985e+000	149.5	56	9.308269e+000	0	0	0	0	0	0	49.6456	1	1	65	57.4815
DATA	702	9	22	0	0	A_64_P240508	ENSRNOT00000018000	4121.5	240	2.545375e+002	2.640651e+001	349	52	1.241156e+001	0	0	0	0	0	0	249.442	1	1	54.1152	53.3056
DATA	703	9	23	0	0	A_64_P026509	NM_020656	4146.5	240	1.617892e+002	1.763950e+001	261	51	1.012502e+001	0	0	0	0	0	0	158.577	1	1	65	50.3667
DATA	704	9	24	0	0	A_42_P570241	NM_177928	4172.38	240.29	3.416364e+002	3.487924e+001	439.5	49	9.028050e+000	0	0	0	0	0	0	334.81	1	1	46.8651	48.4545
DATA	706	9	26	0	0	A_64_P032893	TC597420	4223.42	240.095	4.023478e+004	4.023484e+003	38832	55	1.140950e+001	0	0	0	0	0	0	39379	1	1	49.8279	52.48
DATA	707	9	27	0	0	A_64_P043605	NM_001024799	4248.63	240.043	6.072146e+003	6.072555e+002	5881	50	1.343796e+001	0	0	0	0	0	0	5936.45	1	1	46.8651	52.3103
DATA	708	9	28	0	0	A_64_P095890	NM_019337	4274.16	240.118	1.725966e+004	1.725981e+003	16991.5	51	1.272177e+001	0	0	0	0	0	0	16850.4	1	1	46.5243	52.48
DATA	709	9	29	0	0	A_42_P513145	NM_001107288	4299.27	240.219	4.774687e+002	4.826711e+001	549	50.5	1.549921e+001	0	0	0	0	0	0	465.376	1	1	48.2044	52.8684
DATA	710	9	30	0	0	A_64_P122317	NM_001108031	4324.81	240.343	2.233518e+002	2.343089e+001	321.5	50.5	1.410266e+001	0	0	0	0	0	0	217.27	1	1	45.835	53.5278
DATA	711	9	31	0	0	A_64_P065492	NM_001109101	4350	240	2.649845e+001	7.575892e+000	126.5	54	9.267092e+000	0	0	0	0	0	0	25.7189	1	0	54.9904	52.3429
DATA	712	9	32	0	0	A_64_P129273	NM_001105871	4375.5	240	1.100070e+002	1.310114e+001	211	49	6.990112e+000	0	0	0	0	0	0	106.505	1	1	54.1152	50.0435
DATA	713	9	33	0	0	A_64_P050748	NM_181824	4400.5	240	2.099179e+001	7.436699e+000	120.5	55	8.693466e+000	0	0	0	0	0	0	20.2688	1	0	65	54.1724
DATA	714	9	34	0	0	A_42_P689755	NM_053306	4426.34	240.324	5.440224e+001	8.988832e+000	152.5	60	1.527582e+001	0	0	0	0	0	0	52.3718	1	1	48.2044	57.5625
DATA	715	9	35	0	0	A_64_P039586	TC635481	4451.82	240.379	2.918861e+002	3.005841e+001	377	50	1.927556e+001	0	0	0	0	0	0	280.091	1	1	45.4864	53.8788
DATA	716	9	36	0	0	A_64_P083474	NM_001134731	4476.94	240.224	9.741408e+003	9.741674e+002	9287.5	52	1.083853e+001	0	0	0	0	0	0	9315.97	1	1	45.835	51.8421
DATA	718	9	38	0	0	A_42_P763553	NM_001107486	4527.58	240.427	2.720656e+002	2.815774e+001	370	53	1.019079e+001	0	0	0	0	0	0	258.259	1	1	57.5363	51.069
DATA	719	9	39	0	0	A_44_P151513	NM_001000901	4553.37	240.404	7.320004e+000	7.286588e+000	96	50	1.157694e+001	0	0	0	0	0	0	-6.53447	0	0	57.8122	50.1111
DATA	720	9	40	0	0	A_42_P460204	ENSRNOT00000020886	4578.5	240.352	4.805572e+002	4.860959e+001	548	51	1.094773e+001	0	0	0	0	0	0	452.417	1	1	57.5363	49.6216
DATA	721	9	41	0	0	A_44_P218147	NM_001013432	4603.91	240.386	3.440331e+001	8.114528e+000	132	46	1.031320e+001	0	0	0	0	0	0	32.2473	1	0	57.259	47.8276
DATA	722	9	42	0	0	A_42_P554722	NM_001099758	4629.8	240.446	1.662496e+004	1.662512e+003	15132	51	1.132826e+001	0	0	0	0	0	0	15511.3	1	1	48.8603	50.2727
DATA	723	9	43	0	0	A_44_P135450	XM_223143	4654.58	240.427	2.772469e+002	2.869965e+001	366	56	1.028192e+001	0	0	0	0	0	0	257.494	1	1	57.5363	56.0303
DATA	724	9	44	0	0	A_64_P107329	NM_001013207	4680.43	240.392	1.183134e+004	1.183158e+003	10957	49	1.125332e+001	0	0	0	0	0	0	10934.5	1	1	49.1849	51.8611
DATA	725	9	45	0	0	A_64_P116219	NM_001004085	4705.82	240.639	1.786887e+004	1.786902e+003	16232	54	9.369114e+000	0	0	0	0	0	0	16433.4	1	1	47.8731	52.9697
DATA	726	9	46	0	0	A_44_P147396	NM_001191744	4730.95	240.477	3.173938e+001	8.169822e+000	131	49.5	1.340767e+001	0	0	0	0	0	0	29.0431	1	0	55.8519	50.8529
DATA	727	9	47	0	0	A_44_P975743	TC626448	4756.63	240.64	2.134542e+003	2.135883e+002	1953.5	47	1.331585e+001	0	0	0	0	0	0	1943.07	1	1	48.8603	50.6129
DATA	728	9	48	0	0	A_42_P728472	NM_001007600	4781.93	240.493	9.655394e+003	9.655693e+002	8506	53	1.278773e+001	0	0	0	0	0	0	8743.09	1	1	48.5334	55.9429
DATA	729	9	49	0	0	A_64_P130139	NM_013181	4807.11	240.5	1.477919e+004	1.477939e+003	13040.5	52.5	1.370108e+001	0	0	0	0	0	0	13312	1	1	56.9804	55.6429
DATA	730	9	50	0	0	A_42_P481087	XM_232226	4832.5	240.5	1.317073e+003	1.319315e+002	1224	50	1.070065e+001	0	0	0	0	0	0	1179.91	1	1	57.5363	50.6944
DATA	731	9	51	0	0	A_44_P102465	NM_001000424	4857.67	240.5	4.669601e+001	9.031984e+000	144	46	1.106506e+001	0	0	0	0	0	0	41.6065	1	1	57.5363	46.625
DATA	732	9	52	0	0	A_64_P082557	ENSRNOT00000029274	4883.42	240.427	1.619905e+001	7.941705e+000	116	46	9.993665e+000	0	0	0	0	0	0	14.3527	1	0	65	46.96
DATA	733	9	53	0	0	A_64_P064873	XM_228599	4908.58	240.427	2.944705e+001	8.353918e+000	129	46	9.794270e+000	0	0	0	0	0	0	25.9472	1	0	57.5363	46.1143
DATA	734	9	54	0	0	A_64_P042298	A_64_P042298	4934.32	241.268	7.666848e+001	1.098076e+001	168	51	1.040012e+001	0	0	0	0	0	0	67.1837	1	1	47.5395	52.6552
DATA	735	9	55	0	0	A_44_P286341	ENSRNOT00000038519	4959.93	240.93	8.069183e+000	7.947067e+000	109	53	6.966546e+000	0	0	0	0	0	0	7.03076	1	0	46.8651	52.9259
DATA	736	9	56	0	0	A_44_P994614	NM_001106646	4985.26	240.711	4.816153e+004	4.816160e+003	40941.5	53	1.898710e+001	0	0	0	0	0	0	41728.4	1	1	49.5074	56.48
DATA	737	9	57	0	0	A_64_P098354	XM_001066867	5010.7	240.57	1.361531e+002	1.578930e+001	214	63	7.330302e+000	0	0	0	0	1	0	117.306	1	1	50.7771	61.6667
DATA	738	9	58	0	0	A_64_P117373	NM_001107752	5035.58	240.427	7.457324e+001	1.096544e+001	162	52.5	1.231715e+001	0	0	0	0	0	0	63.8996	1	1	57.5363	54.5
DATA	739	9	59	0	0	A_64_P111395	ENSRNOT00000025391	5061.11	240.5	4.156666e+002	4.234544e+001	455	51	1.537357e+001	0	0	0	0	0	0	354.204	1	1	56.9804	51.6765
DATA	740	9	60	0	0	A_64_P059465	XM_229201	5086.46	241.045	8.164722e+000	8.127538e+000	103	49	1.033389e+001	0	0	0	0	0	0	0.318745	0	0	46.1809	50.5484
DATA	741	9	61	0	0	A_64_P010852	NM_001106214	5112.28	240.84	2.536802e+004	2.536816e+003	20918	50	1.082497e+001	0	0	0	0	0	0	21382.4	1	1	49.1849	49.9286
DATA	742	9	62	0	0	A_64_P024967	NM_001008359	5137.33	240.5	5.951464e+001	1.014524e+001	150.5	52	1.121494e+001	0	0	0	0	0	0	49.8979	1	1	57.5363	51.0541
DATA	743	9	63	0	0	A_44_P278418	NM_012538	5162.5	240.5	2.084064e+001	8.517933e+000	117	48	1.101175e+001	0	0	0	0	0	0	17.3824	1	0	65	50.4828
DATA	744	9	64	0	0	A_44_P821875	NM_001009500	5188.46	241.214	2.988924e+001	8.823224e+000	128	48	9.291573e+000	0	0	0	0	0	0	24.8019	1	0	47.2035	47
DATA	745	9	65	0	0	A_64_P066737	A_64_P066737	5214.03	240.883	5.953303e+001	1.025024e+001	148	49	1.319523e+001	0	0	0	0	0	0	49.1476	1	1	44.4243	51.7742
DATA	746	9	66	0	0	A_64_P003943	TC616650	5238.75	240.942	5.923481e+001	1.026545e+001	153	50	1.037584e+001	0	0	0	0	0	0	48.6691	1	1	46.5243	50.5161
DATA	747	9	67	0	0	A_64_P047035	ENSRNOT00000066263	5264.8	240.743	8.464009e+000	8.425372e+000	95.5	50	1.099445e+001	0	0	0	0	0	0	-5.7566	0	0	46.8651	48.9706
DATA	748	9	68	0	0	A_64_P113867	NM_001077201	5289.5	240.5	3.929796e+002	4.019903e+001	433	50	9.077191e+000	0	0	0	0	0	0	319.849	1	1	57.5363	51.1333
DATA	749	9	69	0	0	A_64_P013758	NM_012582	5315	240.545	6.025569e+001	1.042018e+001	149	47	1.147873e+001	0	0	0	0	0	0	48.8248	1	1	55.8519	48.8065
DATA	750	9	70	0	0	A_44_P303982	NM_001106381	5340.42	240.573	5.679815e+001	1.025429e+001	145	48.5	1.063730e+001	0	0	0	0	0	0	45.8277	1	1	57.5363	49.5938
DATA	751	9	71	0	0	A_64_P048601	A_64_P048601	5366.47	241.041	6.949914e+002	7.002583e+001	665	53	1.302598e+001	0	0	0	0	0	0	558.477	1	1	48.5334	52.5385
DATA	752	9	72	0	0	A_44_P304880	NM_001014261	5391.73	240.932	6.058241e+001	1.052405e+001	148	48.5	1.217667e+001	0	0	0	0	0	0	48.4957	1	1	48.2044	47.9333
DATA	753	9	73	0	0	A_64_P096767	ENSRNOT00000039549	5416.78	240.704	9.215391e+000	8.685622e+000	106	48	1.037036e+001	0	0	0	0	0	0	7.35022	1	0	41.4593	47.5172
DATA	754	9	74	0	0	A_43_P21810	NM_001025000	5442.24	240.782	2.980764e+001	9.164126e+000	123	53.5	1.155728e+001	0	0	0	0	0	0	23.6945	1	0	50.1463	54.0278
DATA	756	9	76	0	0	A_64_P084976	NM_001008916	5492.84	241.6	8.756241e+000	8.716269e+000	86	60	1.408199e+001	0	0	0	0	0	0	-9.02957	0	0	37.847	58.8571
DATA	757	9	77	0	0	A_64_P040004	XM_001054754	5518.65	240.679	4.940032e+003	4.940806e+002	3884.5	61.5	1.391601e+001	0	0	0	0	1	0	3893.24	1	1	50.7771	60.8462
DATA	758	9	78	0	0	A_64_P156785	XM_001058828	5543.58	240.573	8.800676e+000	8.762082e+000	101	50	1.003454e+001	0	0	0	0	0	0	1.30861	0	0	57.5363	50.7778
DATA	759	9	79	0	0	A_64_P123914	XM_217505	5569.63	241.265	3.336594e+004	3.336606e+003	26047	49	6.710115e+000	0	0	0	0	0	0	26187.1	1	1	46.5243	49.8889
DATA	760	9	80	66	1	DarkCorner	DarkCorner	5594.42	240.573	8.832556e+000	8.792236e+000	74	48.5	1.498951e+001	0	0	0	0	0	0	-23.1203	0	0	65	53.7353
DATA	761	9	81	66	1	DarkCorner	DarkCorner	5619.58	240.573	8.843951e+000	8.803579e+000	80	47	1.041246e+001	0	0	0	0	0	0	-14.1882	0	0	57.5363	48.2609
DATA	762	9	82	66	1	DarkCorner	DarkCorner	5645.56	241.136	8.851461e+000	8.811054e+000	81.5	44.5	1.146945e+001	0	0	0	0	0	0	-16.4277	0	0	46.1809	47.25
DATA	763	9	83	66	1	DarkCorner	DarkCorner	5670.5	240.648	8.857259e+000	8.816826e+000	77	43	1.108652e+001	0	0	0	0	0	0	-17.9338	0	0	65	45.1951
DATA	764	9	84	66	1	DarkCorner	DarkCorner	5696.64	241.253	8.857779e+000	8.817344e+000	83	44	1.015238e+001	0	0	0	0	0	0	-13.7977	0	0	48.5334	45.9524
DATA	765	9	85	66	1	DarkCorner	DarkCorner	5721.63	241.219	8.855823e+000	8.815397e+000	82	43	9.725485e+000	0	0	0	0	0	0	-14.8341	0	0	44.7812	43.3667
DATA	766	10	1	66	1	DarkCorner	DarkCorner	3601.89	247.587	7.704844e+000	7.669672e+000	86	49	9.912114e+000	0	0	0	0	0	0	-17.875	0	0	44.0646	50.5833
DATA	767	10	2	66	1	DarkCorner	DarkCorner	3626.5	247	7.642161e+000	7.607275e+000	81	48.5	1.093366e+001	0	0	0	0	0	0	-19.3274	0	0	54.1152	48.8
DATA	768	10	3	66	1	DarkCorner	DarkCorner	3651.91	246.826	7.580899e+000	7.546293e+000	81	48	1.090782e+001	0	0	0	0	0	0	-20.311	0	0	37.847	49.383
DATA	769	10	4	66	1	DarkCorner	DarkCorner	3677.43	246.872	7.523151e+000	7.488809e+000	78	53.5	1.023593e+001	0	0	0	0	0	0	-22.6629	0	0	38.2652	52.75
DATA	770	10	5	66	1	DarkCorner	DarkCorner	3703.06	247.547	7.468325e+000	7.434233e+000	88.5	50	9.723661e+000	0	0	0	0	0	0	-13.3338	0	0	43.7019	49.5429
DATA	771	10	6	66	1	DarkCorner	DarkCorner	3728.63	247.714	7.418103e+000	7.384240e+000	80	49.5	1.048112e+001	0	0	0	0	0	0	-20.0321	0	0	44.4243	50.5556
DATA	772	10	7	0	0	A_64_P139937	XM_001070013	3753.42	247.427	7.373472e+000	7.339813e+000	100	51	1.010990e+001	0	0	0	0	0	0	-0.122581	0	0	57.5363	49.28
DATA	773	10	8	0	0	A_44_P185613	XM_001080030	3778.5	247.352	8.458492e+001	1.117171e+001	186	48	1.086040e+001	0	0	0	0	0	0	79.8394	1	1	57.5363	50.3448
DATA	774	10	9	0	0	A_42_P738520	NM_001007746	3804.37	247.324	1.768148e+003	1.769638e+002	1753	49.5	1.003761e+001	0	0	0	0	0	0	1678.07	1	1	46.5243	49.1667
DATA	775	10	10	66	-1	(-)3xSLv1	NegativeControl	3830.08	247.644	7.255059e+000	7.221940e+000	89.5	51	1.158222e+001	0	0	0	0	0	0	-13.2112	0	0	43.3362	50.9091
DATA	776	10	11	0	0	A_42_P626023	NM_001107265	3855.06	247.382	1.014405e+003	1.016951e+002	1031	49.5	9.395829e+000	0	0	0	0	0	0	971.832	1	1	46.1809	50.8333
DATA	777	10	12	0	0	A_43_P11120	XR_085824	3880.25	247.373	3.941998e+003	3.942648e+002	3845.5	50	1.097486e+001	0	0	0	0	0	0	3791.89	1	1	46.1809	50.381
DATA	778	10	13	0	0	A_42_P473425	NM_138844	3905.84	247.534	8.857421e+001	1.137352e+001	183.5	50.5	1.236919e+001	0	0	0	0	0	0	85.5193	1	1	47.8731	50.5556
DATA	779	10	14	0	0	A_44_P692981	ENSRNOT00000007422	3931	247.455	7.430414e+001	1.028523e+001	174	51	1.163445e+001	0	0	0	0	0	0	71.9738	1	1	55.8519	49.973
DATA	780	10	15	0	0	A_64_P102366	A_64_P102366	3956.84	247.701	1.155872e+001	7.184192e+000	113	54	1.188663e+001	0	0	0	0	0	0	11.2294	1	0	45.835	52.1333
DATA	781	10	16	0	0	A_42_P616287	NM_001134555	3981.58	247.427	2.495206e+002	2.593534e+001	344	47	9.589869e+000	0	0	0	0	0	0	242.992	1	1	57.5363	47.9677
DATA	782	10	17	0	0	A_64_P073995	XM_001081370	4007.7	247.413	7.404697e+000	7.097053e+000	111	50	9.974591e+000	0	0	0	0	0	0	7.22662	1	0	44.4243	49.3226
DATA	783	10	18	0	0	A_42_P595381	NM_001107258	4032.8	247.31	3.856613e+003	3.857256e+002	3651	51.5	8.663454e+000	0	0	0	0	0	0	3770.28	1	1	47.2035	50.9063
DATA	784	10	19	0	0	A_42_P462205	NM_001007745	4057.9	247.493	6.617999e+003	6.618373e+002	6343	52.5	1.181995e+001	0	0	0	0	0	0	6478.79	1	1	47.8731	50.4706
DATA	785	10	20	0	0	A_64_P016102	A_64_P016102	4083.76	247.476	1.649435e+001	7.220245e+000	118	54	8.576952e+000	0	0	0	0	0	0	16.1641	1	0	43.7019	53.8889
DATA	786	10	21	0	0	A_64_P017829	NM_001128216	4108.58	247.427	7.056979e+000	7.024764e+000	97	52	1.196927e+001	0	0	0	0	0	0	-5.594	0	0	65	53.2222
DATA	787	10	22	0	0	A_64_P090244	NM_001127449	4134.11	247.5	1.414455e+005	1.414455e+004	138211	48.5	1.137879e+001	0	0	0	0	0	0	138750	1	1	56.9804	49.9118
DATA	788	10	23	0	0	A_42_P503626	NM_001044247	4159.65	247.917	6.141368e+001	9.328757e+000	161	49.5	8.551316e+000	0	0	0	0	0	0	60.2462	1	1	43.7019	49.3125
DATA	789	10	24	0	0	A_64_P144850	ENSRNOT00000002335	4184.91	248.03	4.920120e+001	8.576001e+000	147	48.5	1.056096e+001	0	0	0	0	0	0	48.2508	1	1	46.8651	48.7353
DATA	790	10	25	0	0	A_42_P703023	NM_145776	4210.88	247.512	4.107335e+002	4.167051e+001	499.5	52	1.034780e+001	0	0	0	0	0	0	402.51	1	1	50.4627	52.3333
DATA	791	10	26	0	0	A_64_P153581	NM_001109367	4235.58	247.427	4.863356e+001	8.553131e+000	151	53	1.278507e+001	0	0	0	0	0	0	47.6152	1	1	57.5363	53.3793
DATA	792	10	27	0	0	A_44_P156782	NM_001013879	4261.11	247.5	1.272247e+003	1.274196e+002	1365	52	1.236601e+001	0	0	0	0	0	0	1244.06	1	1	56.9804	55.4194
DATA	793	10	28	0	0	A_43_P12841	NM_053535	4286.5	247.5	3.817136e+002	3.881794e+001	475	51	1.335422e+001	0	0	0	0	0	0	372.682	1	1	57.5363	53.7059
DATA	794	10	29	0	0	A_64_P097715	NM_001135710	4311.89	247.5	1.072471e+002	1.284449e+001	205	50.5	1.075275e+001	0	0	0	0	0	0	104.519	1	1	65	50
DATA	795	10	30	0	0	A_42_P769597	NM_001106230	4337.57	247.826	1.272740e+003	1.274709e+002	1321	49	1.056735e+001	0	0	0	1	0	0	1237.8	1	1	47.2035	51.5143
DATA	796	10	31	0	0	A_42_P561835	ENSRNOT00000043937	4362.71	247.971	2.587448e+002	2.683078e+001	348	48.5	9.101535e+000	0	0	0	0	0	0	251.059	1	1	46.8651	49.7
DATA	797	10	32	0	0	A_42_P604399	NM_012941	4388.3	247.9	1.916573e+004	1.916587e+003	17916	49	7.359522e+000	0	0	0	0	0	0	18547.5	1	1	47.2035	48.3448
DATA	798	10	33	0	0	A_42_P744495	NM_017125	4413.61	247.594	3.998887e+003	3.999524e+002	3802	54.5	9.530999e+000	0	0	0	0	0	0	3858.78	1	1	47.5395	54.3929
DATA	799	10	34	0	0	A_64_P047391	A_64_P047391	4439.1	247.678	5.197816e+002	5.246909e+001	606	52	1.797602e+001	0	0	0	0	0	0	500.025	1	1	43.7019	54.1176
DATA	800	10	35	0	0	A_44_P856007	NM_001108489	4464.52	247.864	1.761362e+002	1.902247e+001	271	52.5	1.415407e+001	0	0	0	0	0	0	168.885	1	1	45.4864	55.3636
DATA	801	10	36	0	0	A_64_P057562	ENSRNOT00000031129	4489.75	247.403	1.138610e+003	1.140891e+002	1184	46	9.534674e+000	0	0	0	0	0	0	1087.86	1	1	46.5243	47.08
DATA	802	10	37	0	0	A_64_P102395	ENSRNOT00000029656	4515.11	247.5	1.492132e+002	1.658361e+001	243	54	1.174577e+001	0	0	0	0	0	0	142.034	1	1	56.9804	52.0345
DATA	803	10	38	0	0	A_64_P132318	NM_133296	4540.65	248.415	3.338635e+002	3.416755e+001	419	51	9.578424e+000	0	0	0	0	0	0	316.585	1	1	45.1352	51.0606
DATA	805	10	40	0	0	A_64_P158848	NM_001130540	4591.5	248.065	2.026586e+003	2.027909e+002	1970	50	9.134732e+000	0	0	0	0	0	0	1905.55	1	1	43.7019	47.88
DATA	806	10	41	0	0	A_64_P302888	NM_001135015	4617.28	247.71	5.524263e+001	9.202225e+000	150	49.5	1.087107e+001	0	0	0	0	0	0	51.7071	1	1	46.8651	49.8611
DATA	807	10	42	0	0	A_42_P604331	NM_001108533	4642	247.545	9.664335e+004	9.664337e+003	89618.5	57	9.043592e+000	0	0	0	0	0	0	90052	1	1	55.8519	56.1739
DATA	808	10	43	0	0	A_64_P166406	NM_019152	4667.5	248.016	6.889328e+002	6.929252e+001	745	52	1.447342e+001	0	0	0	0	0	0	638.937	1	1	43.7019	53.5625
DATA	809	10	44	0	0	A_64_P123660	NM_001031655	4692.82	247.667	3.048892e+003	3.049806e+002	2767	49	8.739438e+000	0	0	0	0	0	0	2813.8	1	1	47.5395	50.7222
DATA	810	10	45	0	0	A_42_P668800	NM_001127553	4718.35	248.028	1.911790e+003	1.913261e+002	1749	52.5	1.057479e+001	0	0	0	0	0	0	1755.63	1	1	48.5334	54
DATA	811	10	46	0	0	A_64_P090458	NM_001109516	4743.58	247.573	7.574501e+000	7.539924e+000	96	53.5	1.412727e+001	0	0	0	0	0	0	-1.34463	0	0	57.5363	52.9688
DATA	812	10	47	0	0	A_42_P635396	NM_001109506	4769.15	248.277	4.362400e+003	4.363059e+002	3922	46	1.291478e+001	0	0	0	0	0	0	3965.11	1	1	45.835	50.7647
DATA	813	10	48	0	0	A_64_P002989	NM_031604	4794.95	247.854	9.968504e+004	9.968507e+003	90783	55	1.189807e+001	0	0	0	0	0	0	90115.3	1	1	51.0895	57.4444
DATA	814	10	49	0	0	A_44_P914346	DV717012	4819.58	247.573	1.792884e+003	1.794519e+002	1699	50	1.125757e+001	0	0	0	0	0	0	1612.28	1	1	57.5363	51.0938
DATA	815	10	50	0	0	A_44_P791176	NM_001130577	4845.42	247.573	1.554703e+001	7.857986e+000	115	53.5	1.093511e+001	0	0	0	0	0	0	13.9039	1	0	57.5363	51.3125
DATA	816	10	51	0	0	A_64_P011894	NM_001004210	4871.09	247.896	3.428681e+004	3.428690e+003	30082	46	9.393203e+000	0	0	0	0	0	0	30494.9	1	1	46.8651	46.9677
DATA	817	10	52	0	0	A_42_P717654	XM_001063683	4896.09	247.896	5.365609e+003	5.366174e+002	4632	45	1.084257e+001	0	0	0	0	0	0	4746.31	1	1	46.8651	46.1935
DATA	818	10	53	0	0	A_64_P006102	NM_001100784	4921.57	248.29	3.829196e+002	3.908440e+001	435.5	49.5	6.930240e+000	0	0	0	0	0	0	336.86	1	1	46.8651	47.1875
DATA	819	10	54	0	0	A_64_P116038	NM_001000335	4946.58	247.573	7.910593e+000	7.874481e+000	102	55	1.099748e+001	0	0	0	0	0	0	-0.280196	0	0	57.5363	56.7179
DATA	820	10	55	0	0	A_42_P581567	NM_001011899	4972.42	247.573	1.520499e+002	1.714373e+001	236	53	1.604085e+001	0	0	0	0	0	0	132.259	1	1	57.5363	55.0606
DATA	821	10	56	0	0	A_42_P671206	FQ231880	4997.5	247.648	2.032455e+003	2.034014e+002	1819	60	1.690352e+001	0	0	0	0	1	0	1758.22	1	1	57.5363	61.8929
DATA	823	10	58	0	0	A_64_P078205	NM_001044255	5048.63	248.265	7.522737e+003	7.523168e+002	6300	49	1.513359e+001	0	0	0	0	0	0	6436.15	1	1	46.5243	51.4444
DATA	824	10	59	66	-1	(-)3xSLv1	NegativeControl	5073.58	247.573	8.133110e+000	8.095983e+000	81.5	51	1.160623e+001	0	0	0	0	0	0	-23.3024	0	0	57.5363	51.2727
DATA	825	10	60	0	0	A_44_P259051	NM_001037658	5099.4	248.09	8.895946e+002	8.933111e+001	852	51.5	1.107255e+001	0	0	0	0	0	0	752.823	1	1	46.1809	50.0833
DATA	826	10	61	0	0	A_64_P325262	A_64_P325262	5124.5	247.648	1.907282e+001	8.403242e+000	117	53	1.122924e+001	0	0	0	0	0	0	16.0539	1	0	57.5363	51.9688
DATA	827	10	62	0	0	A_64_P140005	NM_001191804	5150.26	248.351	1.196344e+001	8.313372e+000	110	50.5	1.234357e+001	0	0	0	0	0	0	10.0173	1	0	47.5395	51
DATA	828	10	63	0	0	A_42_P588606	NM_001134544	5175.5	248.186	2.655991e+002	2.781752e+001	325	51.5	1.110602e+001	0	0	0	0	0	0	221.245	1	1	47.2035	51.0333
DATA	829	10	64	0	0	A_42_P788541	NM_001106794	5201.2	248.352	7.242513e+003	7.242990e+002	6080	53.5	1.315844e+001	0	0	0	0	0	0	6002.31	1	1	46.8651	56.2308
DATA	830	10	65	0	0	A_44_P1050200	NM_001108000	5226.5	248	1.333280e+003	1.335894e+002	1182	48	1.552396e+001	0	0	0	0	0	0	1099.46	1	1	48.5334	53.08
DATA	831	10	66	0	0	A_42_P777935	ENSRNOT00000027369	5251.71	248.147	2.863372e+002	2.983854e+001	338	49	8.041559e+000	0	0	0	0	0	0	235.001	1	1	45.835	49.3333
DATA	832	10	67	0	0	A_44_P349475	NM_031333	5277.44	248.028	1.266046e+003	1.268852e+002	1130	50	9.758771e+000	0	0	0	0	0	0	1034.13	1	1	48.2044	51.1852
DATA	833	10	68	0	0	A_64_P136188	XM_001059617	5302.42	248	5.989446e+002	6.049052e+001	591	54	1.006371e+001	0	0	0	0	0	0	487.063	1	1	43.7019	54.2759
DATA	834	10	69	0	0	A_64_P023386	NM_001106232	5327.5	248	5.090537e+004	5.090544e+003	41686	53	1.055585e+001	0	0	0	0	0	0	41219.4	1	1	54.1152	51.9211
DATA	835	10	70	0	0	A_64_P048576	NM_001000163	5353.25	248.576	3.899621e+001	9.390215e+000	132	55.5	1.132319e+001	0	0	0	0	0	0	31.4472	1	0	42.9674	54.125
DATA	836	10	71	1028	1	(+)E1A_r60_a20	E1A_r60_a20	5378.93	248.208	1.904921e+001	8.785910e+000	116	52.5	1.317930e+001	0	0	0	0	0	0	15.2994	1	0	46.8651	49.4231
DATA	837	10	72	0	0	A_64_P078510	XM_001053102	5404.64	248.695	4.082363e+002	4.172139e+001	442	48	1.056239e+001	0	0	0	0	0	0	326.673	1	1	42.5954	47.8889
DATA	838	10	73	0	0	A_64_P101533	A_64_P101533	5429.5	248	8.678753e+000	8.639217e+000	99	54.5	1.601169e+001	0	0	0	0	0	0	0.299373	0	0	54.1152	57.1786
DATA	839	10	74	0	0	A_64_P164601	ENSRNOT00000050537	5455.46	248.153	7.357233e+001	1.136908e+001	157	52	1.271727e+001	0	0	0	0	0	0	58.4716	1	1	47.8731	53.9355
DATA	840	10	75	0	0	A_42_P694928	NM_001109046	5480	248	3.848448e+002	3.945405e+001	394	56	1.198340e+001	0	0	0	0	0	0	304.964	1	1	54.9904	56.25
DATA	841	10	76	0	0	A_42_P510565	ENSRNOT00000046259	5505.64	248.072	6.927836e+003	6.928384e+002	5528.5	57.5	2.005063e+001	0	0	0	0	1	0	5474.9	1	1	46.5243	60.2
DATA	842	10	77	0	0	A_64_P050877	XM_001081816	5530.61	248.069	8.777578e+000	8.737509e+000	98	51	1.600074e+001	0	0	0	0	0	0	-0.0692432	0	0	65	54.9032
DATA	843	10	78	0	0	A_44_P281352	NM_001013076	5556.73	248.343	3.949931e+002	4.045819e+001	409	50	8.134950e+000	0	0	0	0	0	0	310.747	1	1	46.8651	51.375
DATA	844	10	79	0	0	A_44_P269675	ENSRNOT00000031839	5581.5	248	4.884711e+002	4.962853e+001	490.5	47	1.013048e+001	0	0	0	0	0	0	383.585	1	1	54.1152	48.28
DATA	845	10	80	66	1	DarkCorner	DarkCorner	5607	248	8.825415e+000	8.785127e+000	78	49.5	1.377308e+001	0	0	0	0	0	0	-21.3762	0	0	54.9904	52.6176
DATA	846	10	81	66	1	DarkCorner	DarkCorner	5633.81	248.404	8.835071e+000	8.794740e+000	80	44	1.091020e+001	0	0	0	0	0	0	-18.7442	0	0	41.0736	45.1087
DATA	847	10	82	66	1	DarkCorner	DarkCorner	5657.61	248.069	8.841881e+000	8.801518e+000	78	49.5	1.052809e+001	0	0	0	0	0	0	-17.1859	0	0	53.8203	46.1667
DATA	848	10	83	66	1	DarkCorner	DarkCorner	5684.26	248.46	8.844640e+000	8.804265e+000	76	46	1.222376e+001	0	0	0	0	0	0	-21.9497	0	0	39.8942	47.6579
DATA	849	10	84	66	1	DarkCorner	DarkCorner	5708.78	248.27	8.844758e+000	8.804382e+000	85	45.5	9.675065e+000	0	0	0	0	0	0	-9.25003	0	0	45.1352	47.0417
DATA	850	10	85	66	1	DarkCorner	DarkCorner	5734.09	248.386	8.840770e+000	8.800413e+000	94	43	9.527029e+000	0	0	0	0	0	0	-2.99671	0	0	57.259	43.3569
DATA	851	11	1	66	1	DarkCorner	DarkCorner	3588.81	254.987	7.729554e+000	7.694270e+000	84	43	9.383603e+000	0	0	0	0	0	0	-18.9646	0	0	48.2044	44.2546
DATA	852	11	2	66	1	DarkCorner	DarkCorner	3613.37	254.308	7.665463e+000	7.630471e+000	78	50	8.698583e+000	0	0	0	0	0	0	-24.5055	0	0	45.4864	51.4643
DATA	853	11	3	66	1	DarkCorner	DarkCorner	3639.2	254.585	7.600887e+000	7.566190e+000	82	48.5	1.094192e+001	0	0	0	0	0	0	-17.9756	0	0	45.4864	49.913
DATA	854	11	4	66	1	DarkCorner	DarkCorner	3665.22	254.704	7.540309e+000	7.505888e+000	86	54	1.048444e+001	0	0	0	0	0	0	-19.6779	0	0	41.4593	52.4865
DATA	855	11	5	66	1	DarkCorner	DarkCorner	3690.24	255.204	7.485485e+000	7.451314e+000	85	52	1.237602e+001	0	0	0	0	0	0	-18.4847	0	0	40.2912	51.5294
DATA	856	11	6	66	1	DarkCorner	DarkCorner	3715.6	254.758	7.434862e+000	7.400923e+000	87	49	1.051929e+001	0	0	0	0	0	0	-18.1274	0	0	43.7019	49.8571
DATA	857	11	7	0	0	A_64_P077381	A_64_P077381	3740.53	255.182	7.994497e+000	7.397242e+000	110	47	7.504284e+000	0	0	0	0	0	0	7.48861	1	0	46.1809	45.7143
DATA	858	11	8	0	0	A_64_P085926	NM_030860	3766.15	254.84	1.375108e+003	1.377050e+002	1337	51	1.196843e+001	0	0	0	0	0	0	1295.82	1	1	48.2044	49.08
DATA	859	11	9	0	0	A_42_P598560	NM_001033693	3791.63	254.64	2.045860e+003	2.047152e+002	2060.5	52.5	1.194254e+001	0	0	0	0	0	0	1938.59	1	1	48.8603	51.5714
DATA	860	11	10	0	1	ETG08_142674	ETG08_142674	3816.58	254.427	7.266707e+000	7.233536e+000	95.5	53	1.113179e+001	0	0	0	0	0	0	-7.0105	0	0	65	52.2
DATA	861	11	11	0	0	A_42_P724142	NM_001106340	3842.28	255.033	1.778130e+003	1.779587e+002	1771	49	9.832965e+000	0	0	0	0	0	0	1701.53	1	1	44.7812	49.4828
DATA	862	11	12	0	0	A_64_P054193	NM_001014193	3867.81	254.709	4.696504e+004	4.696509e+003	44663	49	1.246444e+001	0	0	0	0	0	0	45133	1	1	50.1463	50.6667
DATA	863	11	13	0	0	A_42_P750554	NM_001107846	3892.96	254.865	3.234611e+003	3.235399e+002	3118	46	1.173982e+001	0	0	0	0	0	0	3120.39	1	1	46.8651	48.8519
DATA	864	11	14	0	0	A_44_P285547	NM_053393	3918.5	255.273	1.463322e+002	1.627153e+001	245	54	1.342685e+001	0	0	0	0	0	0	141.664	1	1	46.5243	50.697
DATA	865	11	15	0	0	A_42_P623374	NM_138845	3943.73	255.357	2.269765e+003	2.270873e+002	2285.5	51	1.271888e+001	0	0	0	0	0	0	2204.05	1	1	46.8651	50.3548
DATA	866	11	16	0	0	A_64_P064888	NM_001127303	3969.11	254.5	1.798935e+002	1.933090e+001	284.5	55	1.280071e+001	0	0	0	0	0	0	175.133	1	1	65	55.5161
DATA	867	11	17	0	0	A_44_P522406	NM_001001103	3994.48	255.031	1.013904e+001	7.131630e+000	107	50.5	9.733081e+000	0	0	0	0	0	0	9.89398	1	0	44.0646	50.0938
DATA	868	11	18	0	0	A_42_P660129	NM_130422	4020.13	254.955	4.200555e+001	8.202790e+000	144	51	9.038380e+000	0	0	0	0	0	0	41.0691	1	1	46.8651	50.3333
DATA	869	11	19	0	0	A_64_P035679	A_64_P035679	4045.42	254.573	6.007952e+004	6.007956e+003	58458	51.5	8.680925e+000	0	0	0	0	0	0	58827.7	1	1	57.5363	52.1071
DATA	870	11	20	0	0	A_64_P118862	NM_001191999	4070.58	254.573	1.146577e+002	1.344771e+001	216	50	1.091233e+001	0	0	0	0	0	0	112.401	1	1	57.5363	49.5429
DATA	871	11	21	0	0	A_42_P638181	NM_133395	4096.37	255.265	1.358397e+004	1.358415e+003	12812	54	9.704893e+000	0	0	0	0	0	0	13328.9	1	1	46.5243	55.4194
DATA	872	11	22	0	0	A_44_P423803	NM_031144	4121.73	255.357	1.653611e+004	1.653626e+003	16170	50	1.075824e+001	0	0	0	0	0	0	16233.7	1	1	46.8651	51.4444
DATA	874	11	24	0	0	A_44_P445195	NM_133300	4172.5	255.324	1.562820e+003	1.564394e+002	1606.5	50	6.603496e+000	0	0	0	0	0	0	1534.2	1	1	46.5243	49.6154
DATA	875	11	25	0	0	A_42_P563276	NM_013093	4198.03	254.939	2.912481e+002	2.995908e+001	375.5	50.5	9.715665e+000	0	0	0	0	0	0	285.761	1	1	46.8651	49.8438
DATA	876	11	26	0	0	A_42_P535608	NM_001107160	4223.27	255.186	9.641957e+001	1.193044e+001	193	49	1.069960e+001	0	0	0	0	0	0	94.5303	1	1	43.7019	51.8077
DATA	877	11	27	0	0	A_44_P233080	ENSRNOT00000026303	4248.86	254.986	1.086819e+004	1.086842e+003	10574	52	1.376430e+001	0	0	0	0	0	0	10643.2	1	1	46.8651	53.9259
DATA	878	11	28	0	0	A_43_P13320	NM_138880	4273.58	254.573	7.076402e+000	7.044099e+000	96.5	51	1.244431e+001	0	0	0	0	0	0	-2.53117	0	0	57.5363	55.0333
DATA	879	11	29	0	0	A_42_P548007	NM_001135020	4299.66	255.38	1.476026e+004	1.476043e+003	14117.5	51	1.058463e+001	0	0	0	0	0	0	14410.8	1	1	47.5395	52.9655
DATA	880	11	30	0	0	A_44_P282853	NM_031983	4324.73	255.357	4.100376e+003	4.100985e+002	3990.5	48	1.290454e+001	0	0	0	0	0	0	3995.58	1	1	46.8651	50.027
DATA	881	11	31	0	0	A_42_P552341	NM_053519	4350.49	255.429	1.725851e+003	1.727305e+002	1761	47	9.466951e+000	0	0	0	0	0	0	1677.97	1	1	46.8651	48.1379
DATA	882	11	32	0	0	A_64_P031476	NM_001107172	4375.42	254.573	1.157665e+002	1.358206e+001	212.5	50	8.873556e+000	0	0	0	0	0	0	112.27	1	1	57.5363	48.64
DATA	883	11	33	0	0	A_42_P620762	NM_024403	4401.08	255.123	2.056581e+004	2.056593e+003	19721	50.5	7.515420e+000	0	0	0	0	0	0	19891.2	1	1	45.835	50.8077
DATA	884	11	34	0	0	A_64_P135370	A_64_P135370	4426.51	255.159	4.836700e+002	4.889165e+001	562	52	1.399522e+001	0	0	0	0	0	0	466.421	1	1	43.7019	52.4074
DATA	885	11	35	0	0	A_42_P576202	NM_001108583	4451.77	254.913	1.620608e+003	1.622192e+002	1584	50.5	1.768030e+001	0	0	0	0	0	0	1557.82	1	1	46.5243	54.6
DATA	886	11	36	0	0	A_64_P022879	NM_001109019	4477.45	254.813	3.649716e+001	8.064233e+000	134	50	8.421203e+000	0	0	0	0	0	0	34.9619	1	1	49.1849	50.2
DATA	887	11	37	0	0	A_42_P711589	NM_022948	4502.5	255.324	6.980594e+003	6.980967e+002	6510.5	48.5	1.002589e+001	0	0	0	0	0	0	6663.54	1	1	46.5243	50.0385
DATA	888	11	38	0	0	A_64_P007244	A_64_P007244	4528.3	255.377	6.368383e+003	6.368795e+002	6139	54	1.091690e+001	0	0	0	0	0	0	6055.65	1	1	48.8603	53.3514
DATA	889	11	39	0	0	A_42_P477625	NM_001108719	4553.54	255.38	3.947389e+003	3.948059e+002	3716	54	1.358827e+001	0	0	0	0	0	0	3738.64	1	1	47.5395	52.2222
DATA	890	11	40	0	0	A_64_P153091	XM_341223	4579	255.426	9.485698e+002	9.513775e+001	993.5	51	1.060062e+001	0	0	0	0	0	0	894.65	1	1	45.4864	48.7429
DATA	891	11	41	0	0	A_64_P016347	NM_130819	4603.91	254.614	7.369383e+000	7.335743e+000	90	51	1.235875e+001	0	0	0	0	0	0	-9.7409	0	0	65	51.3636
DATA	892	11	42	0	0	A_42_P495598	NM_001014026	4630.04	254.71	7.403580e+000	7.369783e+000	91	52.5	1.077205e+001	0	0	0	0	0	0	-9.54395	0	0	46.1809	53.5
DATA	893	11	43	0	0	A_42_P759043	NM_001134509	4654.5	255	9.740080e+002	9.768170e+001	971	54	1.435793e+001	0	0	0	0	0	0	906.369	1	1	54.1152	55.3103
DATA	894	11	44	0	0	A_64_P071595	XM_002728361	4680.09	254.935	7.472652e+000	7.438540e+000	99	50	1.029473e+001	0	0	0	0	0	0	-2.04259	0	0	54.4085	51.6923
DATA	895	11	45	0	0	A_42_P780882	NM_001008511	4705.86	255.211	1.111844e+004	1.111869e+003	10309.5	49	8.369626e+000	0	0	0	0	0	0	10245.5	1	1	47.2035	51.275
DATA	896	11	46	0	0	A_64_P044420	NM_001134983	4730.91	254.935	8.009369e+001	1.098158e+001	178	55.5	1.563139e+001	0	0	0	0	0	0	73.4369	1	1	54.4085	57.0667
DATA	897	11	47	0	0	A_64_P000596	NM_001025732	4756.73	255.219	4.690002e+003	4.690610e+002	4198.5	56	1.623716e+001	0	0	0	0	0	0	4277.96	1	1	48.2044	55.3571
DATA	898	11	48	0	0	A_44_P468873	ENSRNOT00000015693	4781.5	255	3.719512e+001	8.453229e+000	140	47	1.138626e+001	0	0	0	0	0	0	33.7536	1	0	65	51.3056
DATA	900	11	50	0	0	A_42_P727022	NM_001107076	4832.84	255.118	1.697313e+004	1.697330e+003	14841.5	51	1.071594e+001	0	0	0	0	0	0	15237.2	1	1	46.5243	49.5641
DATA	901	11	51	0	0	A_64_P135604	NM_001009641	4858.22	255.084	3.794217e+003	3.795001e+002	3431.5	50	1.127697e+001	0	0	0	0	0	0	3387.67	1	1	49.8279	49.7931
DATA	902	11	52	0	0	A_42_P813939	NM_001108741	4883.64	255.13	3.048248e+003	3.049235e+002	2816	45	1.064749e+001	0	0	0	0	0	0	2706.73	1	1	46.8651	44.9643
DATA	903	11	53	0	0	A_64_P052494	A_64_P052494	4908.5	255	7.835756e+000	7.799987e+000	103	49	5.898446e+000	0	0	0	0	0	0	-1.00027	0	0	54.1152	47.6667
DATA	904	11	54	0	0	A_44_P323678	NM_001107651	4934	255	7.879562e+000	7.878792e+000	110	54.5	1.057779e+001	0	0	0	0	0	0	6.5334	0	0	65	56.2
DATA	905	11	55	0	0	A_44_P435764	NM_001191810	4960.11	255.526	7.924096e+000	7.889768e+000	102.5	53.5	1.394621e+001	0	0	0	0	0	0	1.48984	0	0	42.9674	54.375
DATA	906	11	56	0	0	A_42_P688320	NM_001108569	4985.48	255.408	3.272126e+002	3.366895e+001	383	52.5	1.856136e+001	0	0	0	0	0	0	284.167	1	1	47.5395	56.4
DATA	907	11	57	0	0	A_42_P798500	NM_001014023	5010.64	255.13	9.850634e+002	9.882873e+001	932	58	8.770444e+000	0	0	0	1	0	0	850.746	1	1	46.8651	59.1
DATA	908	11	58	0	0	A_44_P279083	NM_133401	5036.29	255.106	6.595473e+002	6.644065e+001	666.5	49.5	1.066948e+001	0	0	0	0	0	0	566.442	1	1	45.835	49.9688
DATA	909	11	59	0	0	A_64_P129850	NM_001002855	5061.09	255.065	8.154870e+000	8.105143e+000	107	48	1.260150e+001	0	0	0	0	0	0	6.96618	1	0	54.4085	50.5185
DATA	910	11	60	0	0	A_64_P029468	NM_001105784	5086.5	255.352	8.144818e+000	8.114479e+000	102	47	1.088740e+001	0	0	0	0	0	0	2.83057	0	0	57.5363	46.8462
DATA	911	11	61	0	0	A_43_P18571	NM_001013965	5111.58	255.427	1.068959e+003	1.072062e+002	1001	53	1.071736e+001	0	0	0	0	0	0	903.429	1	1	57.5363	53.1905
DATA	912	11	62	0	1	ERCC-00104_60	ERCC-00104_60	5137.42	255.427	1.237979e+001	8.287806e+000	108	50	1.120097e+001	0	0	0	0	0	0	10.4064	1	0	57.5363	50.4118
DATA	913	11	63	0	0	A_44_P653701	NM_001106536	5163.08	255.392	2.134028e+002	2.287521e+001	282	49.5	1.040386e+001	0	0	0	0	0	0	178.442	1	1	48.8603	48.3667
DATA	914	11	64	0	0	A_64_P093593	NM_001107077	5188.37	255.63	3.422564e+002	3.521293e+001	383.5	55	1.030178e+001	0	0	0	0	0	0	284.745	1	1	48.2044	54.28
DATA	915	11	65	0	0	A_44_P1034793	NM_001008300	5213.63	255.164	8.078947e+002	8.121694e+001	756	50	1.107520e+001	0	0	0	0	0	0	668.748	1	1	48.5334	51.08
DATA	916	11	66	0	0	A_42_P768355	NM_057130	5239.02	255.063	6.464888e+002	6.518752e+001	612	51	1.148838e+001	0	0	0	0	0	0	532.531	1	1	45.835	53.129
DATA	917	11	67	0	0	A_44_P714581	NM_001107480	5264.57	255.239	4.275082e+003	4.275907e+002	3519	51	1.011741e+001	0	0	0	0	0	0	3504.89	1	1	46.5243	50.8276
DATA	918	11	68	0	0	A_64_P084521	NM_019351	5289.94	255.232	8.350163e+003	8.350590e+002	6836	53	1.128325e+001	0	0	0	0	0	0	6814.55	1	1	46.5243	56.6129
DATA	919	11	69	0	0	A_42_P562625	NM_131913	5315.56	255.74	2.122146e+003	2.123838e+002	1821	53	1.204946e+001	0	0	0	0	0	0	1724.36	1	1	49.5074	53.5758
DATA	920	11	70	0	0	A_42_P468662	NM_001108886	5340.42	255.427	1.759382e+003	1.761440e+002	1515.5	54	1.059176e+001	0	0	0	1	0	0	1423.6	1	1	57.5363	53.2353
DATA	921	11	71	0	0	A_42_P778587	NM_001135767	5366.25	255.627	3.300841e+002	3.409728e+001	363.5	54	1.225631e+001	0	0	0	0	0	0	266.003	1	1	49.1849	53.7
DATA	922	11	72	0	0	A_64_P139957	NM_001008525	5391.48	255.648	2.038257e+004	2.038275e+003	16170	51.5	1.069558e+001	0	0	0	0	0	0	16363.4	1	1	47.8731	50.3462
DATA	923	11	73	0	0	A_44_P318402	NM_001000187	5416.83	255.171	9.240297e+001	1.263147e+001	174.5	54	1.243348e+001	0	0	0	0	0	0	73.9091	1	1	46.8651	52.5161
DATA	924	11	74	0	0	A_64_P090359	NM_001033565	5442	255.455	1.803564e+001	8.826773e+000	114	57	1.512798e+001	0	0	0	0	0	0	14.3787	1	0	55.8519	58.7568
DATA	925	11	75	0	0	A_43_P17778	NM_001134991	5467.78	255.458	2.037342e+001	8.904104e+000	112	54	1.196624e+001	0	0	0	0	0	0	16.1912	1	0	47.5395	53.963
DATA	926	11	76	0	0	A_64_P093176	A_64_P093176	5493.09	255.478	4.326305e+001	9.709578e+000	129	54	1.431653e+001	0	0	0	0	0	0	34.2849	1	0	47.8731	54.0345
DATA	927	11	77	0	0	A_64_P100123	NM_182821	5518.51	255.427	7.258957e+003	7.259480e+002	5582	52.5	1.808357e+001	0	0	0	0	0	0	5737.74	1	1	49.1849	56.8462
DATA	928	11	78	0	0	A_44_P426660	NM_001135717	5543.5	255.5	8.774326e+000	8.736747e+000	101	50	1.055849e+001	0	0	0	0	0	0	1.63989	0	0	57.5363	49.6923
DATA	929	11	79	0	0	A_42_P696084	NM_031022	5569.31	255.662	2.958642e+003	2.959936e+002	2436	48	6.202956e+000	0	0	0	0	0	0	2328.86	1	1	48.5334	47.32
DATA	930	11	80	66	1	DarkCorner	DarkCorner	5594.42	255.427	8.806178e+000	8.765978e+000	77	47	1.360133e+001	0	0	0	0	0	0	-21.7805	0	0	57.5363	51.0606
DATA	931	11	81	66	1	DarkCorner	DarkCorner	5620.31	255.656	8.817387e+000	8.777136e+000	82	45	1.100105e+001	0	0	0	0	0	0	-15.0598	0	0	44.4243	47.05
DATA	932	11	82	66	1	DarkCorner	DarkCorner	5645.7	255.326	8.826209e+000	8.785918e+000	77	44	1.091169e+001	0	0	0	0	0	0	-21.94	0	0	36.5637	43.7273
DATA	933	11	83	66	1	DarkCorner	DarkCorner	5670.5	255.5	8.830790e+000	8.790478e+000	76	46	1.174035e+001	0	0	0	0	0	0	-24.6655	0	0	57.5363	46.1
DATA	934	11	84	66	1	DarkCorner	DarkCorner	5696.62	255.768	8.831949e+000	8.791632e+000	85	44	1.017425e+001	0	0	0	0	0	0	-13.787	0	0	46.8651	46.3462
DATA	935	11	85	66	1	DarkCorner	DarkCorner	5721.71	255.692	8.830121e+000	8.789812e+000	86.5	44.5	9.264256e+000	0	0	0	0	0	0	-10.5802	0	0	50.1463	43.9667
DATA	936	12	1	66	1	DarkCorner	DarkCorner	3600.58	261.573	7.688648e+000	7.653550e+000	80	46	9.862878e+000	0	0	0	0	0	0	-19.1535	0	0	57.5363	46.8776
DATA	937	12	2	66	1	DarkCorner	DarkCorner	3626.42	261.573	7.622723e+000	7.587925e+000	87	49.5	9.009399e+000	0	0	0	0	0	0	-15.5398	0	0	57.5363	49.4211
DATA	938	12	3	66	1	DarkCorner	DarkCorner	3652.78	261.96	7.559330e+000	7.524823e+000	83	48	1.023931e+001	0	0	0	0	0	0	-19.334	0	0	39.4933	48.4444
DATA	939	12	4	66	1	DarkCorner	DarkCorner	3677.17	261.844	7.505101e+000	7.470841e+000	81.5	55	9.559012e+000	0	0	0	0	0	0	-18.5065	0	0	45.4864	53.0667
DATA	940	12	5	66	1	DarkCorner	DarkCorner	3702.89	262.048	7.451360e+000	7.417345e+000	79	52	1.202411e+001	0	0	0	0	0	0	-23.2748	0	0	45.1352	51.8
DATA	941	12	6	0	0	A_64_P118227	XM_002728056	3728.63	261.974	7.401710e+000	7.367922e+000	98	47	8.342573e+000	0	0	0	0	0	0	-5.76325	0	0	49.1849	48.7931
DATA	942	12	7	0	0	A_64_P051317	NM_130425	3753.5	262.324	1.205613e+002	1.410601e+001	216	50	1.287094e+001	0	0	0	0	0	0	113.406	1	1	46.5243	50.2593
DATA	943	12	8	0	0	A_42_P756350	NM_021772	3778.5	261.648	7.566041e+001	1.050158e+001	174	46	1.165836e+001	0	0	0	0	0	0	71.5654	1	1	57.5363	48.0741
DATA	944	12	9	0	0	A_42_P816479	NM_022278	3804.37	262.265	1.383362e+004	1.383381e+003	12889	57	1.159102e+001	0	0	0	0	0	0	13156.9	1	1	46.5243	55.4783
DATA	945	12	10	0	0	A_64_P351634	NM_001029901	3829.61	262.129	1.711728e+002	1.857303e+001	265.5	46	9.286133e+000	0	0	0	0	0	0	163.586	1	1	47.2035	48.0323
DATA	946	12	11	0	0	A_64_P136597	A_64_P136597	3855.2	262.333	6.825792e+002	6.863405e+001	750.5	47.5	1.242006e+001	0	0	0	0	0	0	655.274	1	1	46.5243	50.0357
DATA	947	12	12	0	0	A_64_P052017	ENSRNOT00000033592	3880.37	261.596	7.180449e+000	7.147671e+000	94	48	9.871640e+000	0	0	0	0	0	0	-3.79486	0	0	57.8122	48.6667
DATA	948	12	13	0	0	A_44_P444485	TC589779	3905.57	262.29	2.931945e+003	2.932810e+002	2831	49.5	1.267422e+001	0	0	0	0	0	0	2836.13	1	1	46.8651	49.875
DATA	949	12	14	0	0	A_44_P147373	XM_226249	3931.14	262.211	2.372013e+003	2.373075e+002	2320.5	53.5	1.098065e+001	0	0	0	0	0	0	2301.96	1	1	47.2035	52.3333
DATA	950	12	15	0	0	A_64_P059939	NM_001134540	3956.52	262.08	4.158624e+004	4.158630e+003	40015	54	1.433764e+001	0	0	0	0	0	0	40472.3	1	1	50.4627	52.1333
DATA	951	12	16	0	0	A_42_P637279	NM_012743	3981.77	262.18	7.093157e+000	7.060777e+000	91	52	1.239688e+001	0	0	0	0	0	0	-11.6563	0	0	44.7812	54.8824
DATA	952	12	17	0	0	A_42_P771570	XM_001080365	4007.43	261.768	4.975153e+002	5.024803e+001	584	48	1.237400e+001	0	0	0	0	0	0	486.38	1	1	46.8651	48.5172
DATA	953	12	18	0	0	A_43_P12942	NM_053817	4032.84	261.897	1.257155e+004	1.257175e+003	12067	52	8.901396e+000	0	0	0	0	0	0	12311.4	1	1	46.5243	51.1212
DATA	954	12	19	0	0	A_64_P053307	NM_001191900	4058	262	1.260461e+001	7.136787e+000	115	50	1.086533e+001	0	0	0	0	0	0	12.3605	1	0	65	48.6571
DATA	955	12	20	0	0	A_42_P595630	NM_001013189	4083.36	262.119	8.209199e+003	8.209499e+002	8293	46	9.526227e+000	0	0	0	0	0	0	8058.39	1	1	45.835	45.3438
DATA	956	12	21	0	0	A_64_P154760	A_64_P154760	4108.5	262	4.603601e+002	4.656712e+001	553	48.5	8.917125e+000	0	0	0	0	0	0	452.191	1	1	54.1152	50.0313
DATA	957	12	22	0	0	A_42_P764359	NM_145086	4134	262	1.613296e+003	1.614819e+002	1716	47	1.079948e+001	0	0	0	0	0	0	1585.18	1	1	54.9904	50.4211
DATA	958	12	23	0	0	A_43_P10405	NM_001109257	4159.5	262	4.891064e+001	8.548354e+000	146	48	1.037440e+001	0	0	0	0	0	0	48.0576	1	1	65	48.25
DATA	959	12	24	0	0	A_44_P269950	ENSRNOT00000014054	4185	262	1.763089e+001	7.231408e+000	118	52	7.927197e+000	0	0	0	0	0	0	17.3176	1	0	54.9904	52.0741
DATA	960	12	25	0	0	A_44_P160763	NM_001106513	4210.78	262.25	1.632986e+002	1.777389e+001	262.5	47.5	8.703934e+000	0	0	0	0	0	0	160.296	1	1	45.1352	49.3824
DATA	961	12	26	0	0	A_64_P127678	NM_001008553	4235.91	262.104	1.199272e+003	1.201328e+002	1267	50	7.475190e+000	0	0	0	0	0	0	1176.09	1	1	46.8651	51.0385
DATA	962	12	27	0	0	A_42_P684885	NM_133517	4261.09	262.065	7.065342e+000	7.051248e+000	105	53	1.334252e+001	0	0	0	0	0	0	4.95332	0	0	65	54.9091
DATA	963	12	28	0	0	A_64_P102708	NM_001034149	4286.52	261.734	1.148602e+001	7.137189e+000	111	51	1.030346e+001	0	0	0	0	0	0	11.2323	1	0	44.7812	54.8065
DATA	964	12	29	0	0	A_42_P547629	NM_001106718	4311.61	262.069	5.780653e+002	5.823563e+001	650	48	1.088215e+001	0	0	0	0	0	0	564.308	1	1	53.8203	49.2759
DATA	965	12	30	0	0	A_42_P522285	NM_001044263	4337.27	262.225	5.110339e+002	5.159029e+001	573	48	9.216278e+000	0	0	0	0	0	0	497.833	1	1	47.2035	48.1613
DATA	966	12	31	0	0	A_64_P164423	NM_057193	4362.5	262	1.420962e+001	7.228903e+000	110	48.5	8.733452e+000	0	0	0	0	0	0	13.8101	1	0	54.1152	48.2813
DATA	967	12	32	0	0	A_44_P256143	NM_001047917	4388.09	262.386	2.256937e+002	2.366163e+001	322.5	50	7.529276e+000	0	0	0	0	0	0	218.785	1	1	57.259	48.76
DATA	968	12	33	0	0	A_44_P727294	NM_001160314	4413.66	262.125	2.728230e+003	2.729160e+002	2604	48	8.971767e+000	0	0	0	0	0	0	2637.1	1	1	45.1352	48.7241
DATA	969	12	34	0	0	A_64_P108404	NM_001000092	4439.03	262.288	5.957818e+001	9.305623e+000	158.5	58	1.659159e+001	0	0	0	0	0	0	57.413	1	1	45.835	56.069
DATA	970	12	35	0	0	A_44_P520829	NM_001108777	4464.43	261.968	7.672809e+002	7.706257e+001	818	51	1.395277e+001	0	0	0	0	0	0	736.939	1	1	44.0646	54.4138
DATA	971	12	36	0	0	A_44_P229677	NM_001014221	4489.86	261.915	1.878009e+003	1.879387e+002	1933	47	6.304076e+000	0	0	0	0	0	0	1797.41	1	1	44.0646	47.7931
DATA	972	12	37	0	0	A_64_P126215	A_64_P126215	4515.09	262.386	7.256712e+000	7.223586e+000	99	54	1.075742e+001	0	0	0	0	0	0	-2.68752	0	0	57.259	51.4103
DATA	973	12	38	0	0	A_64_P090035	A_64_P090035	4540.75	262.627	4.164964e+003	4.165596e+002	4169	54	1.213287e+001	0	0	0	0	0	0	3956.3	1	1	49.1849	55.1613
DATA	974	12	39	0	0	A_64_P089330	ENSRNOT00000012374	4565.58	262.427	1.246327e+002	1.443423e+001	218	46	1.004511e+001	0	0	0	0	0	0	117.914	1	1	57.5363	47.0857
DATA	975	12	40	0	0	A_44_P454429	NM_012712	4591.66	262.339	8.972498e+001	1.157524e+001	198	51	9.476638e+000	0	0	0	0	0	0	84.5172	1	1	41.4593	49.16
DATA	976	12	41	0	1	ERCC-00144_60	ERCC-00144_60	4617.1	262.097	7.379393e+000	7.348876e+000	102.5	51	9.631109e+000	0	0	0	0	0	0	2.02374	0	0	45.4864	51.7297
DATA	977	12	42	0	0	A_42_P759843	XR_086347	4642.03	262.136	4.032157e+003	4.032832e+002	3746	55	9.221089e+000	0	0	0	0	0	0	3764.31	1	1	46.5243	54.4815
DATA	978	12	43	0	0	A_43_P14264	NM_053653	4667.74	262.42	9.020670e+002	9.051083e+001	921	53	1.354499e+001	0	0	0	0	0	0	838.169	1	1	46.8651	54
DATA	979	12	44	0	0	A_64_P011223	NM_024353	4692.58	262.427	4.264720e+002	4.329284e+001	520	49	1.139295e+001	0	0	0	0	0	0	394.391	1	1	65	50.5278
DATA	980	12	45	0	0	A_42_P701169	NM_001109572	4718.5	262.5	2.420425e+003	2.421583e+002	2245	51	9.516218e+000	0	0	0	0	0	0	2227.06	1	1	49.1849	51.4074
DATA	981	12	46	0	0	A_64_P143307	NM_001014106	4743.58	262.427	4.356330e+002	4.420833e+001	502.5	58	1.912658e+001	0	0	0	0	1	0	398.824	1	1	65	60.1471
DATA	982	12	47	0	0	A_44_P480636	NM_001005381	4769	262.455	2.773434e+002	2.874713e+001	347	50	1.210696e+001	0	0	0	0	0	0	252.6	1	1	55.8519	51.6129
DATA	983	12	48	0	0	A_64_P163564	ENSRNOT00000010609	4794.55	262.318	6.559870e+001	1.004225e+001	158.5	52	1.111826e+001	0	0	0	0	0	0	59.4299	1	1	38.6789	52.5172
DATA	984	12	49	0	0	A_42_P774028	NM_001017447	4819.58	262.427	3.900716e+003	3.901465e+002	3466	49.5	1.171641e+001	0	0	0	0	0	0	3515.42	1	1	57.5363	49.375
DATA	985	12	50	0	0	A_43_P20110	ENSRNOT00000050558	4845.33	262.5	2.315251e+001	8.026613e+000	120.5	52	1.020415e+001	0	0	0	0	0	0	20.7519	1	0	57.5363	51.5161
DATA	986	12	51	0	0	A_44_P552865	NM_001170399	4870.58	262.427	4.904364e+002	4.964866e+001	540.5	47.5	1.051297e+001	0	0	0	0	0	0	437.203	1	1	65	49.1786
DATA	987	12	52	0	0	A_43_P17428	NM_001012189	4895.75	262.25	3.302070e+002	3.392248e+001	402	50	9.628146e+000	0	0	0	0	0	0	292.759	1	1	45.1352	49.5135
DATA	988	12	53	0	0	A_64_P146222	TC633165	4921.8	262.761	1.861634e+004	1.861650e+003	16435.5	46	5.789904e+000	0	0	0	0	0	0	16413.2	1	1	46.8651	46.8333
DATA	989	12	54	0	0	A_64_P054856	NM_001135894	4947.01	262.771	5.559703e+002	5.614937e+001	598	55.5	1.101573e+001	0	0	0	0	0	0	487.485	1	1	46.8651	56.2895
DATA	990	12	55	0	0	A_64_P154982	ENSRNOT00000018118	4972.34	262.838	1.505155e+004	1.505175e+003	12653	50.5	1.632679e+001	0	0	0	0	0	0	13124.8	1	1	49.1849	52.7353
DATA	991	12	56	0	0	A_42_P726363	NM_031536	4997.89	262.877	2.202010e+001	8.243482e+000	122	55	1.469913e+001	0	0	0	0	0	0	19.0947	1	0	46.1809	57.2581
DATA	992	12	57	0	0	A_64_P139685	A_64_P139685	5022.89	262.5	8.024375e+000	8.006627e+000	107	52	1.063250e+001	0	0	0	0	0	0	4.73933	0	0	56.9804	51.5833
DATA	993	12	58	0	0	A_64_P114104	NM_001034136	5048.59	262.579	8.582129e+003	8.582505e+002	7177	50	3.838658e+000	0	0	0	0	0	0	7360.23	1	1	49.5074	50.1667
DATA	994	12	59	0	0	A_42_P480273	A_42_P480273	5074.13	262.623	6.450811e+003	6.451317e+002	5458	46.5	9.372496e+000	0	0	0	0	0	0	5502.17	1	1	46.8651	46.4667
DATA	995	12	60	0	0	A_64_P004344	ENSRNOT00000047696	5099.57	262.761	2.173654e+004	2.173669e+003	18327	53	1.066947e+001	0	0	0	0	0	0	18440.5	1	1	46.5243	50.8636
DATA	996	12	61	0	0	A_42_P723584	NM_001109099	5124.69	262.797	4.247070e+003	4.247854e+002	3581	56.5	9.554356e+000	0	0	0	1	0	0	3584.16	1	1	49.1849	55.7857
DATA	997	12	62	0	0	A_64_P114813	A_64_P114813	5150.42	262.487	8.244223e+000	8.245235e+000	110	50	1.023530e+001	0	0	0	0	0	0	6.69307	0	0	49.8279	48.9429
DATA	998	12	63	0	0	A_64_P034551	NM_053818	5175.39	262.697	1.050957e+002	1.335963e+001	188	52.5	1.165873e+001	0	0	0	0	0	0	87.7743	1	1	49.5074	54
DATA	999	12	64	0	0	A_42_P492976	NM_001126099	5200.94	262.614	3.930383e+002	4.016860e+001	422.5	57.5	1.378978e+001	0	0	0	0	1	0	326.593	1	1	47.2035	60.4091
DATA	1000	12	65	0	0	A_64_P141799	NM_001025709	5226.11	262.5	1.182411e+003	1.185342e+002	1060	49.5	1.038740e+001	0	0	0	0	0	0	977.714	1	1	56.9804	51.25
DATA	1001	12	66	0	0	A_44_P337088	NM_133609	5251.75	262.627	9.279175e+002	9.316857e+001	832	54.5	1.208883e+001	0	0	0	0	0	0	763.593	1	1	49.1849	55.2647
DATA	1002	12	67	0	0	A_64_P137961	A_64_P137961	5276.89	262.5	6.941606e+001	1.090459e+001	160.5	52	1.120304e+001	0	0	0	0	0	0	56.8597	1	1	56.9804	54.6471
DATA	1003	12	68	0	0	A_64_P053822	ENSRNOT00000028268	5302.42	262.573	6.739256e+001	1.080650e+001	157	57.5	1.051732e+001	0	0	0	0	0	0	54.9547	1	1	57.5363	57.8529
DATA	1004	12	69	0	0	A_42_P484456	NM_001106601	5328.01	262.771	5.220184e+003	5.220873e+002	4316	58	1.113968e+001	0	0	0	1	0	0	4238.46	1	1	46.8651	56.2857
DATA	1005	12	70	0	0	A_44_P508632	NM_001107594	5353.11	262.5	8.558256e+000	8.544821e+000	104.5	54.5	1.022415e+001	0	0	0	0	0	0	5.34778	0	0	65	55.1333
DATA	1006	12	71	0	0	A_64_P080598	NM_001047865	5378.5	262.5	4.732641e+001	9.774768e+000	133	53	9.456980e+000	0	0	0	0	0	0	38.1181	1	1	57.5363	51.7188
DATA	1007	12	72	0	0	A_64_P144243	A_64_P144243	5403.67	262.5	8.623529e+000	8.602781e+000	105	51	1.196816e+001	0	0	0	0	0	0	4.53938	0	0	57.5363	51.9333
DATA	1008	12	73	0	0	A_44_P479917	NM_030864	5429.36	262.459	2.616275e+001	9.003032e+000	122	56	1.415809e+001	0	0	0	0	0	0	20.921	1	0	48.8603	57.5806
DATA	1009	12	74	0	0	A_44_P974524	NM_001025764	5455.18	262.667	3.761451e+001	9.425566e+000	130.5	49.5	1.611388e+001	0	0	0	0	0	0	29.9809	1	0	45.4864	51.6667
DATA	1010	12	75	0	0	A_42_P522899	NM_021578	5480.32	263.035	6.443846e+001	1.080027e+001	149	48.5	1.295745e+001	0	0	0	0	0	0	51.214	1	1	50.7771	51.8462
DATA	1011	12	76	0	0	A_64_P069892	NM_019201	5505.93	262.718	3.639885e+004	3.639895e+003	28412	47	9.226930e+000	0	0	0	0	0	0	28848.4	1	1	47.2035	46.8929
DATA	1012	12	77	0	0	A_44_P415199	NM_001108748	5530.58	262.573	1.376458e+001	8.820235e+000	106.5	52	1.260645e+001	0	0	0	0	0	0	10.8834	1	0	65	50.4516
DATA	1013	12	78	0	0	A_64_P034610	NM_022622	5556.7	263.232	1.514567e+002	1.748153e+001	217	49	1.145404e+001	0	0	0	0	0	0	119.51	1	1	46.8651	52.1515
DATA	1014	12	79	0	0	A_42_P473828	ENSRNOT00000035309	5581.81	262.781	3.943269e+003	3.944239e+002	3030	48	9.464479e+000	0	0	0	1	0	0	3105.72	1	1	48.2044	47.8276
DATA	1015	12	80	66	1	DarkCorner	DarkCorner	5607.59	262.746	8.799498e+000	8.759329e+000	74	45	1.225482e+001	0	0	0	0	0	0	-22.6692	0	0	47.5395	48.2258
DATA	1016	12	81	66	1	DarkCorner	DarkCorner	5632.81	263.212	8.808412e+000	8.768202e+000	77.5	44.5	1.034960e+001	0	0	0	0	0	0	-19.8697	0	0	40.6843	43.8333
DATA	1017	12	82	66	1	DarkCorner	DarkCorner	5657.58	262.573	8.816062e+000	8.775818e+000	78	42	1.169028e+001	0	0	0	0	0	0	-18.8283	0	0	57.5363	42.6552
DATA	1018	12	83	66	1	DarkCorner	DarkCorner	5683.42	262.573	8.819490e+000	8.779230e+000	76.5	46	1.090551e+001	0	0	0	0	0	0	-18.6727	0	0	57.5363	47.6111
DATA	1019	12	84	66	1	DarkCorner	DarkCorner	5709.17	262.45	8.819558e+000	8.779298e+000	75	48	1.072694e+001	0	0	0	0	0	0	-23.9233	0	0	42.9674	49.6087
DATA	1020	12	85	66	1	DarkCorner	DarkCorner	5734	262.545	8.815742e+000	8.775499e+000	87	44	9.789060e+000	0	0	0	0	0	0	-9.86042	0	0	55.8519	45.2169
DATA	1021	13	1	66	1	DarkCorner	DarkCorner	3588.93	269.171	7.708979e+000	7.673788e+000	89	44	9.890037e+000	0	0	0	0	0	0	-13.3169	0	0	46.8651	44.7154
DATA	1022	13	2	66	1	DarkCorner	DarkCorner	3613.5	269	7.644991e+000	7.610092e+000	77	52	9.246321e+000	0	0	0	0	0	0	-22.0877	0	0	54.1152	52.1389
DATA	1023	13	3	66	1	DarkCorner	DarkCorner	3639.59	269.288	7.580643e+000	7.546038e+000	80	49	8.766821e+000	0	0	0	0	0	0	-20.6087	0	0	42.9674	50
DATA	1024	13	4	66	1	DarkCorner	DarkCorner	3665.05	269.297	7.522297e+000	7.487958e+000	81	51	7.437944e+000	0	0	0	0	0	0	-21.4679	0	0	47.8731	50.8611
DATA	1025	13	5	66	1	DarkCorner	DarkCorner	3690	269.522	7.468644e+000	7.434550e+000	85	54.5	1.213303e+001	0	0	0	0	0	0	-15.4931	0	0	46.1809	54.6071
DATA	1026	13	6	0	0	A_64_P029912	NM_001109143	3715.74	269.569	1.276244e+002	1.474433e+001	220.5	49	8.288082e+000	0	0	0	0	0	0	119.07	1	1	45.1352	49
DATA	1027	13	7	0	0	A_42_P574731	NM_012948	3740.73	269.219	5.177088e+003	5.177608e+002	4820.5	47	1.077147e+001	0	0	0	0	0	0	4860.11	1	1	48.2044	48.7692
DATA	1028	13	8	0	0	A_44_P137448	NM_017043	3766.09	269.257	5.008712e+002	5.061551e+001	571	50.5	1.109934e+001	0	0	0	1	0	0	472.993	1	1	46.5243	48.6667
DATA	1029	13	9	0	0	A_42_P770614	NM_001013235	3791.68	269.291	4.881849e+004	4.881854e+003	45387	51.5	1.162755e+001	0	0	0	1	0	0	46357	1	1	50.7771	51.8
DATA	1030	13	10	0	0	A_42_P785419	NM_199501	3816.5	269.352	3.093846e+002	3.176941e+001	398.5	52	8.553713e+000	0	0	0	0	0	0	295.243	1	1	57.5363	50.5652
DATA	1031	13	11	0	0	A_42_P581043	TC622715	3842.38	269.5	1.222369e+004	1.222390e+003	11396.5	47	7.255414e+000	0	0	0	0	0	0	11720.4	1	1	48.5334	47.8889
DATA	1032	13	12	0	0	A_64_P098532	NM_001029928	3867.5	269.352	7.468275e+000	7.193431e+000	113	48.5	9.407633e+000	0	0	0	0	0	0	7.19062	1	0	57.5363	48.7353
DATA	1033	13	13	0	0	A_64_P090758	A_64_P090758	3893.27	269.423	9.727881e+002	9.753953e+001	1050.5	48	1.187785e+001	0	0	0	0	0	0	940.262	1	1	50.1463	49.8
DATA	1034	13	14	0	0	A_43_P12079	NM_021583	3918.42	269.427	6.253600e+001	9.463484e+000	162	50.5	1.195889e+001	0	0	0	0	0	0	60.6497	1	1	57.5363	48.5909
DATA	1035	13	15	0	0	A_64_P001947	A_64_P001947	3943.58	269.427	7.114054e+000	7.105898e+000	107	54.5	1.179678e+001	0	0	0	0	0	0	5.7138	0	0	65	53.8571
DATA	1036	13	16	0	0	A_64_P064461	A_64_P064461	3969	269.455	2.818852e+001	7.604617e+000	129	56	1.245655e+001	0	0	0	0	0	0	27.4928	1	0	55.8519	56.9677
DATA	1037	13	17	0	0	A_42_P575398	NM_020538	3994.78	269.383	7.079096e+000	7.046781e+000	93	50	1.223422e+001	0	0	0	0	0	0	-7.39402	0	0	42.9674	51.3636
DATA	1038	13	18	0	0	A_42_P482623	NM_199463	4020.26	269.348	2.664041e+003	2.664969e+002	2697.5	46	9.713607e+000	0	0	0	0	0	0	2609.14	1	1	47.2035	46.3333
DATA	1039	13	19	0	0	A_42_P738431	NM_019175	4045.44	269.521	3.225843e+003	3.226608e+002	3210	51	9.443489e+000	0	0	0	0	0	0	3164.19	1	1	48.2044	51.5556
DATA	1040	13	20	0	0	A_44_P1027780	ENSRNOT00000065815	4070.67	269.714	3.218129e+001	7.717487e+000	132	49	9.200201e+000	0	0	0	0	0	0	31.6035	1	0	47.2035	47.0571
DATA	1041	13	21	0	0	A_42_P479802	NM_053679	4095.94	269.7	2.085345e+003	2.086522e+002	2122	48	7.842831e+000	0	0	0	1	0	0	2049.57	1	1	46.8651	49.52
DATA	1042	13	22	0	0	A_44_P496624	NM_022302	4121.42	270.031	5.464148e+001	8.884211e+000	157	51	8.733448e+000	0	0	0	0	0	0	53.732	1	1	44.0646	51.8387
DATA	1043	13	23	0	0	A_42_P700753	FQ212883	4146.93	269.732	2.493498e+003	2.494481e+002	2526	48	1.155724e+001	0	0	0	0	0	0	2452.27	1	1	47.5395	49.8163
DATA	1044	13	24	0	0	A_44_P229299	NM_001100678	4172.79	270.015	5.087788e+002	5.135791e+001	600	49.5	1.053380e+001	0	0	0	0	0	0	500.29	1	1	46.1809	48.0667
DATA	1045	13	25	0	0	A_42_P728472	NM_001007600	4197.69	269.338	9.166386e+003	9.166654e+002	8796	48.5	9.044552e+000	0	0	0	0	0	0	9008.38	1	1	48.5334	49.8824
DATA	1046	13	26	0	0	A_42_P488904	NM_001108947	4223.32	269.521	1.346015e+004	1.346033e+003	12660	50.5	7.997971e+000	0	0	0	0	0	0	13217.7	1	1	48.5334	51.5909
DATA	1047	13	27	0	0	A_42_P458494	NM_001034951	4248.59	269.507	1.026898e+002	1.244064e+001	203	49	8.867664e+000	0	0	0	0	0	0	100.729	1	1	47.8731	48.7241
DATA	1048	13	28	0	0	A_64_P100331	ENSRNOT00000048614	4274.43	269.667	2.511582e+001	7.467526e+000	126	51	1.174102e+001	0	0	0	0	0	0	24.6018	1	0	46.8651	54.5806
DATA	1049	13	29	0	0	A_64_P113989	NM_181631	4299.48	269.853	1.698133e+004	1.698148e+003	16313.5	51.5	1.335375e+001	0	0	0	0	0	0	16606.7	1	1	49.8279	54.6818
DATA	1050	13	30	0	0	A_64_P042105	ENSRNOT00000061599	4324.94	269.552	3.696524e+001	7.967395e+000	136	48	1.231219e+001	0	0	0	0	0	0	36.078	1	1	46.1809	50.5135
DATA	1051	13	31	0	0	A_64_P044435	NM_001015020	4350.41	269.753	1.059390e+003	1.061749e+002	1146	47	9.339125e+000	0	0	0	0	0	0	1031.69	1	1	48.5334	48.5882
DATA	1052	13	32	0	0	A_64_P149011	NM_031352	4375.48	269.853	5.165915e+003	5.166402e+002	4959.5	51	7.674944e+000	0	0	0	0	0	0	5018.69	1	1	49.8279	50.3571
DATA	1053	13	33	0	0	A_42_P580844	NM_019296	4401.06	269.382	3.483604e+002	3.555429e+001	432	49	1.377127e+001	0	0	0	0	0	0	337.492	1	1	46.1809	51.8276
DATA	1054	13	34	0	0	A_64_P052972	A_64_P052972	4426.53	269.297	2.503371e+002	2.602970e+001	347	52.5	9.668041e+000	0	0	0	0	0	0	241.809	1	1	44.7812	52.9167
DATA	1055	13	35	0	0	A_44_P454300	NM_001003979	4451.5	269.5	7.186426e+000	7.153621e+000	98	49.5	1.552247e+001	0	0	0	0	0	0	-4.75501	0	0	65	52.4667
DATA	1056	13	36	0	0	A_44_P149743	ENSRNOT00000005476	4477.22	269.762	1.108961e+001	7.263145e+000	106	49.5	7.445125e+000	0	0	0	0	0	0	10.6425	1	0	45.1352	50.5333
DATA	1057	13	37	0	0	A_42_P841017	NM_173309	4502.38	270	9.015299e+003	9.015587e+002	8332	50	9.108110e+000	0	0	0	0	0	0	8621.3	1	1	48.5334	51.0714
DATA	1058	13	38	0	0	A_44_P206844	NM_013074	4528.02	270.246	1.868665e+002	2.003684e+001	278	58	1.117906e+001	0	0	0	0	0	0	178.022	1	1	45.4864	54.973
DATA	1059	13	39	0	0	A_64_P073400	NM_001000705	4553.33	269.5	9.004268e+001	1.156666e+001	183	50	1.140116e+001	0	0	0	0	0	0	85.4335	1	1	57.5363	50.6857
DATA	1060	13	40	0	0	A_64_P066676	A_64_P066676	4578.94	269.882	7.323803e+000	7.319186e+000	106	53	9.096647e+000	0	0	0	0	0	0	6.13069	0	0	46.8651	49.6563
DATA	1061	13	41	0	0	A_44_P386965	NM_001134594	4603.93	269.714	7.355190e+000	7.321614e+000	96.5	51	1.131747e+001	0	0	0	0	0	0	-2.73404	0	0	46.8651	50.9091
DATA	1062	13	42	0	0	A_64_P095895	NM_019338	4629.68	269.618	8.209718e+001	1.102253e+001	179	52	1.126782e+001	0	0	0	0	0	0	76.8903	1	1	46.5243	53.0625
DATA	1063	13	43	1028	1	(+)E1A_r60_a22	E1A_r60_a22	4654.58	269.573	1.546042e+002	1.713520e+001	241	55	1.358775e+001	0	0	0	0	0	0	144.142	1	1	57.5363	55.2424
DATA	1064	13	44	0	0	A_42_P541625	NM_001126090	4680.37	269.64	3.277163e+004	3.277172e+003	30091.5	48	1.126079e+001	0	0	0	0	0	0	30406.8	1	1	48.8603	49.6552
DATA	1065	13	45	0	0	A_64_P033895	NM_001126084	4705.94	269.761	1.947394e+002	2.085421e+001	279.5	53	1.065159e+001	0	0	0	0	0	0	179.802	1	1	46.8651	52.6486
DATA	1066	13	46	0	0	A_64_P012546	NM_022300	4730.89	269.5	9.111565e+004	9.111568e+003	82925	51	1.754212e+001	0	0	0	0	0	0	83711.3	1	1	56.9804	57.7429
DATA	1067	13	47	0	0	A_42_P495598	NM_001014026	4756.42	269.573	7.570939e+000	7.536378e+000	94.5	56	1.704979e+001	0	0	0	0	0	0	-3.772	0	0	57.5363	57.1667
DATA	1068	13	48	0	0	A_42_P483463	NM_001130999	4781.86	270.172	5.343007e+003	5.343544e+002	4865	52	1.006025e+001	0	0	0	0	0	0	4858.78	1	1	45.4864	52.2188
DATA	1069	13	49	0	0	A_42_P575104	NM_153737	4807.37	269.64	3.571334e+004	3.571342e+003	30924.5	49	7.634855e+000	0	0	0	0	0	0	32302.4	1	1	48.8603	48.9286
DATA	1070	13	50	0	0	A_42_P461726	NM_133549	4832.5	269.5	1.756551e+001	7.855466e+000	119.5	52	1.227316e+001	0	0	0	0	0	0	15.8036	1	0	57.5363	50.3415
DATA	1071	13	51	0	0	A_64_P098688	A_64_P098688	4857.67	269.5	9.612511e+004	9.612514e+003	86175	48.5	1.097927e+001	0	0	0	0	0	0	86020.9	1	1	57.5363	50.1875
DATA	1072	13	52	0	0	A_64_P105797	A_64_P105797	4883.41	270.094	8.586535e+001	1.155992e+001	174	51	1.129948e+001	0	0	0	0	0	0	76.4226	1	1	44.7812	49.3333
DATA	1073	13	53	0	0	A_42_P545943	NM_019291	4908.77	270.273	1.232559e+004	1.232584e+003	10664.5	46	6.059534e+000	0	0	0	0	0	0	10910.4	1	1	45.4864	46.2222
DATA	1074	13	54	0	0	A_44_P520045	NM_001001371	4934	269.545	1.168783e+002	1.406582e+001	207	51	1.043422e+001	0	0	0	0	0	0	102.882	1	1	55.8519	51.6111
DATA	1075	13	55	0	0	A_44_P306964	NM_001012184	4959.71	270.123	5.071060e+001	9.361386e+000	144	55	1.296479e+001	0	0	0	0	0	0	44.3928	1	1	45.835	53.5
DATA	1076	13	56	0	0	A_44_P156043	NM_001039012	4984.58	269.573	2.617555e+003	2.618751e+002	2286	52	1.284479e+001	0	0	0	0	0	0	2278.87	1	1	57.5363	51.3636
DATA	1077	13	57	0	0	A_64_P054686	TC585752	5010.77	270.273	3.434468e+004	3.434478e+003	29366.5	55	1.313945e+001	0	0	0	0	0	0	29734.6	1	1	45.4864	55.6129
DATA	1078	13	58	0	0	A_42_P575104	NM_153737	5036.01	269.945	3.589889e+004	3.589898e+003	29754	52	5.239642e+000	0	0	0	0	0	0	30909.3	1	1	46.8651	51.5769
DATA	1079	13	59	0	0	A_64_P142194	NM_053426	5061	269.545	1.582048e+003	1.584092e+002	1435.5	47	8.880947e+000	0	0	0	0	0	0	1354.78	1	1	55.8519	47.6061
DATA	1080	13	60	0	0	A_64_P043314	A_64_P043314	5086.5	269.648	6.096208e+001	1.012802e+001	154	52	9.416995e+000	0	0	0	0	0	0	51.9226	1	1	57.5363	50.5862
DATA	1081	13	61	0	0	A_44_P684315	NM_001109104	5112.38	270	4.548867e+004	4.548874e+003	37121	54	1.031942e+001	0	0	0	0	0	0	38535.5	1	1	48.5334	54.0952
DATA	1082	13	62	0	0	A_64_P142620	NM_201417	5137.42	269.573	4.660070e+001	9.409491e+000	143	50	1.015429e+001	0	0	0	0	0	0	39.27	1	1	57.5363	49.7353
DATA	1083	13	63	0	0	A_42_P568419	NM_001011894	5162.83	270.323	1.948386e+003	1.950117e+002	1752	43	1.065026e+001	0	0	0	0	0	0	1633.61	1	1	45.4864	46.8065
DATA	1084	13	64	0	0	A_42_P519868	NM_053906	5188.46	270.114	1.419220e+002	1.642014e+001	224	55	9.172480e+000	0	0	0	0	0	0	118.38	1	1	47.8731	55.9565
DATA	1085	13	65	0	0	A_43_P12346	NM_022943	5213.69	269.891	1.111175e+002	1.386924e+001	194	53	9.231280e+000	0	0	0	0	0	0	92.2252	1	1	45.1352	52.7037
DATA	1087	13	67	0	0	A_44_P556989	NM_012610	5264.42	269.573	8.942824e+001	1.225537e+001	174	57	1.127067e+001	0	0	0	0	0	0	73.5146	1	1	57.5363	58.1935
DATA	1088	13	68	0	0	A_64_P113079	XM_218149	5290.27	270.469	8.455824e+000	8.419457e+000	103	58	1.164878e+001	0	0	0	0	0	0	1.58696	0	0	39.8942	57.2
DATA	1089	13	69	0	0	A_64_P003937	NM_173111	5315.08	270.099	6.917329e+003	6.917845e+002	5526	53	1.290999e+001	0	0	0	0	0	0	5636.47	1	1	46.8651	55.2333
DATA	1090	13	70	0	0	A_42_P771337	NM_001012015	5340.83	270.174	1.785655e+002	1.977209e+001	248	58	1.207478e+001	0	0	0	0	0	0	144.884	1	1	46.1809	57.2432
DATA	1091	13	71	0	0	A_44_P401035	A_44_P401035	5366.01	270.118	7.708286e+001	1.149236e+001	165	50	9.459219e+000	0	0	0	0	0	0	62.2944	1	1	46.8651	49.0882
DATA	1092	13	72	0	0	A_42_P536292	NM_033359	5391.5	270.179	1.077323e+003	1.080715e+002	949	49	1.045073e+001	0	0	0	0	0	0	867.33	1	1	49.1849	49.697
DATA	1093	13	73	0	0	A_44_P128564	NM_001109121	5416.87	269.919	1.817287e+002	2.009971e+001	246	54	1.437025e+001	0	0	0	0	0	0	145.776	1	1	45.1352	55.7143
DATA	1094	13	74	0	0	A_64_P069957	NM_173315	5442	270	1.834476e+001	8.808984e+000	115	54	1.394654e+001	0	0	0	0	0	0	14.667	1	0	65	53.4878
DATA	1095	13	75	0	0	A_44_P538691	NM_031772	5467.76	270	1.341489e+002	1.595807e+001	207	50	1.115994e+001	0	0	0	0	0	0	106.919	1	1	46.8651	52.5172
DATA	1096	13	76	0	0	A_44_P499231	NM_001034148	5493	269.797	5.597718e+002	5.664427e+001	529	49	1.261172e+001	0	0	0	0	0	0	444.875	1	1	46.8651	52.3429
DATA	1097	13	77	0	0	A_64_P121489	XM_001065883	5518.5	270	8.729414e+000	8.689565e+000	101	49	9.478421e+000	0	0	0	0	0	0	-0.0805858	0	0	54.1152	48.0741
DATA	1098	13	78	0	0	A_42_P507072	FQ213070	5543.93	270.2	5.783228e+003	5.783884e+002	4657	51	9.895367e+000	0	0	0	0	0	0	4574.42	1	1	46.8651	48.5806
DATA	1099	13	79	0	0	A_64_P120075	ENSRNOT00000027841	5569.21	270.194	2.895592e+002	3.024211e+001	331	49	9.597827e+000	0	0	0	0	0	0	228.591	1	1	47.5395	47.5806
DATA	1100	13	80	0	0	A_44_P1007362	NM_138864	5594.56	270.07	3.799291e+002	3.898529e+001	397	46	8.987351e+000	0	0	0	0	0	0	299.439	1	1	48.2044	47.5714
DATA	1101	13	81	66	1	DarkCorner	DarkCorner	5619.65	269.833	8.791970e+000	8.751836e+000	80	45	8.936548e+000	0	0	0	0	0	0	-18.2659	0	0	39.4933	45.4063
DATA	1102	13	82	66	1	DarkCorner	DarkCorner	5646.2	270.356	8.799636e+000	8.759467e+000	79	42	8.408944e+000	0	0	0	0	0	0	-16.3117	0	0	37.4241	42.3235
DATA	1103	13	83	66	1	DarkCorner	DarkCorner	5671.24	270.463	8.804306e+000	8.764115e+000	81	43	1.124341e+001	0	0	0	0	0	0	-19.5705	0	0	41.8414	45.5128
DATA	1104	13	84	66	1	DarkCorner	DarkCorner	5696.87	270.2	8.806344e+000	8.766144e+000	80	46	9.180323e+000	0	0	0	0	0	0	-20.5219	0	0	41.0736	46.7241
DATA	1105	13	85	66	1	DarkCorner	DarkCorner	5721.5	270	8.804835e+000	8.764641e+000	83	47	1.001803e+001	0	0	0	0	0	0	-15.7489	0	0	54.1152	48.1951
DATA	1106	14	1	66	1	DarkCorner	DarkCorner	3600.94	277	7.666227e+000	7.631231e+000	79	45.5	1.149526e+001	0	0	0	0	0	0	-21.2726	0	0	37.847	46.25
DATA	1107	14	2	66	1	DarkCorner	DarkCorner	3626.33	276.5	7.603003e+000	7.568296e+000	83	52	1.027405e+001	0	0	0	0	0	0	-18.521	0	0	57.5363	51.4878
DATA	1108	14	3	66	1	DarkCorner	DarkCorner	3652.06	276.682	7.542142e+000	7.507713e+000	84	48	9.293533e+000	0	0	0	0	0	0	-19.955	0	0	45.835	49.5714
DATA	1109	14	4	66	1	DarkCorner	DarkCorner	3677.73	276.732	7.485590e+000	7.451419e+000	78	50	8.447561e+000	0	0	0	0	0	0	-23.8459	0	0	36.1258	49.8065
DATA	1110	14	5	66	1	DarkCorner	DarkCorner	3702.5	276.5	7.435025e+000	7.401085e+000	83	51	1.169099e+001	0	0	0	0	0	0	-19.5175	0	0	57.5363	52.625
DATA	1111	14	6	0	0	A_64_P151415	NM_001191684	3728.14	277.014	2.823332e+002	2.917480e+001	361	52.5	7.922024e+000	0	0	0	0	0	0	264.545	1	1	46.8651	52.0385
DATA	1112	14	7	0	0	A_42_P475623	NM_053394	3753.61	276.948	7.236340e+002	7.273138e+001	750.5	47	1.078500e+001	0	0	0	0	0	0	682.195	1	1	49.1849	48.129
DATA	1113	14	8	0	0	A_44_P123636	ENSRNOT00000023689	3778.5	276.5	7.300331e+000	7.267006e+000	94	51	1.005464e+001	0	0	0	0	0	0	-6.05352	0	0	57.5363	51.4688
DATA	1114	14	9	0	0	A_64_P135207	ENSRNOT00000043866	3803.89	276.5	3.195585e+002	3.276332e+001	410.5	56	1.177398e+001	0	0	0	0	0	0	304.51	1	1	65	53.72
DATA	1115	14	10	0	0	A_42_P516693	NM_001107330	3829.5	276.5	7.226927e+000	7.193937e+000	91	47.5	8.037556e+000	0	0	0	0	0	0	-10.6929	0	0	57.5363	49.1333
DATA	1116	14	11	0	0	A_64_P125447	NM_001109231	3854.67	276.5	1.115343e+002	1.325526e+001	211	48	7.779916e+000	0	0	0	0	0	0	107.267	1	1	57.5363	48.2069
DATA	1117	14	12	0	0	A_42_P701756	NM_001107646	3880.49	277	4.504058e+003	4.504623e+002	4343.5	48	7.917488e+000	0	0	0	0	0	0	4349.66	1	1	47.2035	47.0741
DATA	1118	14	13	0	0	A_44_P344181	NM_017204	3905.5	276.5	6.717671e+002	6.755175e+001	751	55	1.059609e+001	0	0	0	0	0	0	650.996	1	1	57.5363	55.9091
DATA	1119	14	14	0	0	A_64_P035330	ENSRNOT00000066415	3931.23	276.788	3.841012e+002	3.905811e+001	477	47.5	9.033930e+000	0	0	0	0	0	0	373.447	1	1	45.835	47.5313
DATA	1120	14	15	0	0	A_42_P837533	NM_001134546	3956.63	277.265	6.959422e+003	6.959780e+002	6749	57	1.242262e+001	0	0	0	0	1	0	6785.8	1	1	46.5243	60.1923
DATA	1121	14	16	0	0	A_42_P744291	NM_001025729	3981.94	277.031	1.997651e+003	1.998893e+002	2028	52	1.519669e+001	0	0	0	0	0	0	1952.48	1	1	46.8651	53.2424
DATA	1122	14	17	0	0	A_44_P149267	NM_001013099	4007.33	276.5	2.704016e+001	7.535770e+000	128	46.5	9.897914e+000	0	0	0	0	0	0	26.4814	1	0	57.5363	47.6316
DATA	1123	14	18	0	0	A_64_P002546	NM_144741	4033.19	276.558	7.054009e+000	7.021808e+000	95.5	46	9.245303e+000	0	0	0	0	0	0	-5.8335	0	0	40.2912	47.6286
DATA	1124	14	19	0	0	A_42_P808236	NM_001107189	4057.89	276.5	4.546018e+001	8.357350e+000	147	49	1.068903e+001	0	0	0	0	0	0	44.655	1	1	56.9804	48.4571
DATA	1125	14	20	0	0	A_44_P425848	NM_001108747	4083.45	277.21	9.724766e+002	9.749964e+001	1044	47	1.020190e+001	0	0	0	0	0	0	956.276	1	1	43.3362	46.6897
DATA	1126	14	21	0	0	A_43_P17405	TC612613	4108.57	277.208	1.941983e+002	2.064319e+001	289	48	7.432672e+000	0	0	0	0	0	0	191.084	1	1	47.8731	49.2692
DATA	1127	14	22	0	0	A_64_P022402	NM_001142304	4134.11	276.5	7.031328e+000	7.026151e+000	105	49	9.568602e+000	0	0	0	0	0	0	6.04758	0	0	56.9804	49.5
DATA	1128	14	23	0	0	A_44_P1019726	ENSRNOT00000025138	4159.89	277.212	2.045100e+002	2.161544e+001	303.5	47.5	9.472038e+000	0	0	0	0	0	0	201.288	1	1	45.835	47.5
DATA	1129	14	24	0	0	A_44_P128186	NM_053305	4184.89	276.5	1.125001e+002	1.325093e+001	209	48.5	1.030744e+001	0	0	0	0	0	0	110.682	1	1	56.9804	49.6176
DATA	1130	14	25	0	0	A_44_P203665	NM_001105725	4210.32	276.899	1.256010e+002	1.438193e+001	225	51.5	9.285568e+000	0	0	0	0	0	0	123.496	1	1	46.5243	51.1875
DATA	1131	14	26	0	0	A_42_P688802	DV723748	4235.63	276.712	4.446523e+003	4.447076e+002	4331	47	8.572023e+000	0	0	0	0	0	0	4367.77	1	1	48.5334	48.2903
DATA	1132	14	27	0	0	A_64_P129943	NM_001105712	4261.31	277.045	5.104757e+002	5.152819e+001	596.5	51.5	1.215022e+001	0	0	0	0	0	0	500.822	1	1	45.835	54.0278
DATA	1133	14	28	0	0	A_64_P017577	NM_001106982	4286.5	276.648	7.465910e+000	7.071851e+000	111	50.5	1.051504e+001	0	0	0	0	0	0	7.31328	1	0	57.5363	53.6154
DATA	1134	14	29	0	0	A_44_P235926	NM_024138	4311.58	276.573	2.924679e+002	3.008332e+001	386	54.5	1.380825e+001	0	0	0	0	0	0	285.977	1	1	65	55.2333
DATA	1135	14	30	0	0	A_42_P611638	NM_001034137	4337.66	277.38	1.676419e+003	1.677905e+002	1702	47	8.441981e+000	0	0	0	0	0	0	1635.87	1	1	47.5395	46.7273
DATA	1136	14	31	0	0	A_42_P654878	NM_001107919	4362.8	277.348	2.472905e+003	2.473917e+002	2428	51	1.058623e+001	0	0	0	0	0	0	2407.52	1	1	46.5243	51.4545
DATA	1137	14	32	0	0	A_64_P017464	NM_001135687	4388.09	276.614	7.126973e+000	7.094439e+000	96.5	50	1.322818e+001	0	0	0	0	0	0	-4.53023	0	0	57.259	53.2121
DATA	1138	14	33	0	0	A_64_P152873	NM_001207022	4413.86	276.781	4.815899e+001	8.591336e+000	144	50.5	1.219730e+001	0	0	0	0	0	0	46.6287	1	1	47.8731	50.75
DATA	1139	14	34	0	0	A_64_P013243	A_64_P013243	4439.04	276.892	9.821936e+003	9.822195e+002	9402	50	1.161852e+001	0	0	0	0	0	0	9481.22	1	1	46.8651	50.36
DATA	1140	14	35	0	0	A_64_P029720	NM_001109405	4464.73	277	1.729264e+002	1.871621e+001	273	56	1.450184e+001	0	0	0	0	0	0	166.378	1	1	45.4864	56.6452
DATA	1141	14	36	0	0	A_43_P13459	NM_001107548	4490.05	276.955	1.830060e+002	1.966039e+001	276	49.5	7.759014e+000	0	0	0	0	0	0	175.464	1	1	46.8651	49.9333
DATA	1142	14	37	0	0	A_64_P053923	NM_001107323	4515	277.191	1.796482e+003	1.797929e+002	1785	54	1.009091e+001	0	0	0	0	0	0	1716.28	1	1	46.8651	51.9667
DATA	1143	14	38	0	0	A_44_P1005199	ENSRNOT00000032786	4540.61	277.508	6.554288e+001	9.764918e+000	169	51.5	1.046966e+001	0	0	0	0	0	0	62.3749	1	1	43.7019	52.8158
DATA	1144	14	39	0	0	A_44_P104821	NM_024369	4565.83	277.114	1.035703e+002	1.265275e+001	196.5	50	9.446149e+000	0	0	0	0	0	0	98.1632	1	1	46.8651	48.2162
DATA	1145	14	40	0	0	A_64_P009956	A_64_P009956	4591.64	277.258	2.452627e+002	2.558937e+001	334	51	1.165733e+001	0	0	0	0	0	0	231.466	1	1	46.1809	51.68
DATA	1146	14	41	0	0	A_64_P060947	NM_203334	4616.5	277	1.707513e+001	7.527093e+000	119	50	1.069976e+001	0	0	0	0	0	0	16.0449	1	0	54.1152	49.5278
DATA	1147	14	42	0	0	A_64_P103419	NM_001106291	4642	277	7.398130e+000	7.364358e+000	100	55	1.113703e+001	0	0	0	0	0	0	-1.623	0	0	54.9904	54.3667
DATA	1148	14	43	0	0	A_44_P220827	NM_001012051	4667.87	277.1	1.309134e+003	1.311224e+002	1290	51	1.357471e+001	0	0	0	0	0	0	1218.74	1	1	46.8651	51.0909
DATA	1149	14	44	0	1	ETG07_105829	ETG07_105829	4692.5	277	7.468275e+000	7.434183e+000	99	50	1.318293e+001	0	0	0	0	0	0	-1.34016	0	0	54.1152	52.2941
DATA	1150	14	45	0	0	A_42_P719478	NM_001191779	4718.59	277.183	2.548456e+001	7.894413e+000	124	50	1.319148e+001	0	0	0	0	0	0	23.4954	1	0	47.5395	51.7188
DATA	1151	14	46	0	0	A_42_P462257	NM_001109481	4743.96	277.141	1.680667e+004	1.680683e+003	15296	54.5	1.832165e+001	0	0	0	0	0	0	15417	1	1	46.8651	58.8824
DATA	1152	14	47	0	0	A_44_P105634	NM_001007658	4769.19	277.086	1.832214e+002	1.981598e+001	267	53	1.018059e+001	0	0	0	0	0	0	167.214	1	1	46.8651	52.8889
DATA	1153	14	48	0	0	A_64_P100594	NM_001000360	4794.53	276.949	6.814513e+001	1.019850e+001	160	52.5	8.890501e+000	0	0	0	0	0	0	61.867	1	1	43.7019	54.1786
DATA	1154	14	49	0	0	A_64_P004266	A_64_P004266	4819.5	277	1.165500e+001	7.715732e+000	111	49	1.093291e+001	0	0	0	0	0	0	10.5263	1	0	54.1152	50.3421
DATA	1155	14	50	0	0	A_44_P156343	NM_001000102	4845.5	277	7.704370e+000	7.669201e+000	98	51	1.103824e+001	0	0	0	0	0	0	-0.346846	0	0	54.1152	51.303
DATA	1156	14	51	0	0	A_42_P504358	NM_001108674	4870.5	277	4.188119e+002	4.258499e+001	468	49.5	1.022457e+001	0	0	0	0	0	0	374.181	1	1	54.1152	49.9412
DATA	1157	14	52	0	0	A_44_P281468	NM_001127556	4896.81	277.438	7.788983e+000	7.763756e+000	105	49	9.408599e+000	0	0	0	0	0	0	3.55699	0	0	39.4933	50
DATA	1158	14	53	0	0	A_43_P12785	NM_053364	4921.5	277	7.831181e+000	7.795432e+000	91.5	46	7.141084e+000	0	0	0	0	0	0	-9.80429	0	0	54.1152	46.069
DATA	1159	14	54	0	0	A_64_P053297	NM_001107278	4947.3	277.173	4.183673e+003	4.184407e+002	3749.5	52	1.075007e+001	0	0	0	0	0	0	3676.45	1	1	49.8279	51.5897
DATA	1160	14	55	0	0	A_64_P062986	NM_001001018	4972.97	277.357	7.918671e+000	7.882523e+000	101	48.5	1.234206e+001	0	0	0	0	0	0	-0.559678	0	0	46.5243	50.1333
DATA	1161	14	56	0	0	A_44_P529226	NM_023091	4997.5	277	7.961358e+000	7.925015e+000	84	52	1.165547e+001	0	0	0	0	0	0	-18.1747	0	0	54.1152	52.5833
DATA	1162	14	57	0	0	A_42_P559737	NM_020074	5022.91	277.386	1.944738e+003	1.946370e+002	1730	50	9.909917e+000	0	0	0	0	0	0	1681.25	1	1	57.259	50.1613
DATA	1163	14	58	0	0	A_44_P1017458	NM_199402	5048.5	277.352	1.062249e+002	1.330533e+001	195	53	1.026494e+001	0	0	0	0	0	0	91.3285	1	1	65	54.5357
DATA	1164	14	59	0	0	A_44_P407750	NM_001127680	5073.81	276.906	1.847909e+003	1.849664e+002	1668.5	51	8.404067e+000	0	0	0	0	0	0	1580.1	1	1	45.835	51.0882
DATA	1165	14	60	0	0	A_64_P033872	NM_001037353	5099.37	277.404	2.311374e+001	8.422376e+000	115	50.5	1.032693e+001	0	0	0	0	0	0	19.6593	1	0	57.8122	48.8571
DATA	1166	14	61	0	0	A_42_P472699	NM_001108061	5124.5	277.352	5.700291e+001	9.938779e+000	150	50	1.076646e+001	0	0	0	0	0	0	48.2297	1	1	57.5363	51.2
DATA	1167	14	62	0	0	A_44_P201215	ENSRNOT00000014231	5149.91	277.386	2.339635e+001	8.512011e+000	120	48	8.993742e+000	0	0	0	0	0	0	19.6926	1	0	57.259	47.3714
DATA	1168	14	63	0	0	A_64_P129910	NM_001107648	5175.37	277.7	3.861512e+002	3.948154e+001	420.5	52	1.271259e+001	0	0	0	0	0	0	323.376	1	1	47.8731	51.88
DATA	1169	14	64	0	0	A_64_P027927	NM_022255	5200.58	277.427	7.019628e+001	1.084541e+001	160.5	53	7.251974e+000	0	0	0	0	0	0	58.4899	1	1	57.5363	54.3448
DATA	1170	14	65	0	0	A_64_P101623	A_64_P101623	5226.63	277.305	3.694875e+004	3.694884e+003	30974.5	51	1.021293e+001	0	0	0	0	0	0	30632.1	1	1	51.0895	50.6176
DATA	1171	14	66	0	0	A_42_P645110	NM_001029919	5251.94	277.232	3.286130e+004	3.286141e+003	26635	52	1.250619e+001	0	0	0	0	0	0	27114.1	1	1	46.5243	54.0263
DATA	1172	14	67	0	0	A_64_P017781	NM_001010956	5277.04	277.388	2.082892e+002	2.245395e+001	267.5	53.5	1.186894e+001	0	0	0	0	0	0	171.083	1	1	45.835	54.5
DATA	1173	14	68	0	0	A_64_P057106	NM_001004087	5303	277.293	1.357005e+002	1.597273e+001	211	55.5	1.107057e+001	0	0	0	0	0	0	110.952	1	1	49.1849	55.8333
DATA	1174	14	69	0	0	A_44_P187005	NM_022238	5327.58	277.427	6.788152e+001	1.084658e+001	157	52	1.094430e+001	0	0	0	0	0	0	55.2735	1	1	65	53.7778
DATA	1175	14	70	0	0	A_42_P779933	NM_017117	5353.4	277.388	7.063270e+001	1.104805e+001	157	53	1.240676e+001	0	0	0	0	0	0	57.274	1	1	46.1809	54.8857
DATA	1176	14	71	0	0	A_42_P555701	NM_001107554	5378.87	277.623	1.600741e+004	1.600763e+003	12709	49	1.065765e+001	0	0	0	0	0	0	12929.9	1	1	46.8651	47.5676
DATA	1177	14	72	0	0	A_42_P705302	NM_001107361	5404	277.5	9.533158e+003	9.533543e+002	7565.5	46	1.094286e+001	0	0	0	0	0	0	7672.15	1	1	48.5334	48.3939
DATA	1178	14	73	0	0	A_64_P015435	A_64_P015435	5429.46	277.386	4.417612e+004	4.417621e+003	35228.5	53	1.447452e+001	0	0	0	0	0	0	35428.5	1	1	47.5395	53.3871
DATA	1179	14	74	0	0	A_64_P036217	NM_001000569	5454.89	277.355	4.734694e+001	9.832241e+000	136.5	48	1.248199e+001	0	0	0	0	0	0	37.8491	1	1	44.4243	48.2
DATA	1180	14	75	0	0	A_44_P543511	NM_001024749	5480.63	277.119	1.647301e+003	1.649567e+002	1465	48	6.330854e+000	0	0	0	0	0	0	1312.85	1	1	42.9674	47.5833
DATA	1181	14	76	0	0	A_42_P759043	NM_001134509	5505.8	277.239	8.799640e+002	8.842212e+001	770	49	1.587418e+001	0	0	0	0	0	0	699.457	1	1	46.8651	53.6944
DATA	1182	14	77	0	0	A_42_P679982	NM_001107835	5531.31	277.662	4.986998e+003	4.987754e+002	3939	51.5	9.688007e+000	0	0	0	0	0	0	3954.8	1	1	48.5334	49.7333
DATA	1183	14	78	0	0	A_43_P18064	NM_001106904	5556.42	277.427	8.744876e+000	8.721918e+000	105	49	1.123803e+001	0	0	0	0	0	0	4.30224	0	0	57.5363	49.28
DATA	1184	14	79	0	0	A_64_P092143	NM_001129879	5582.06	277.768	4.664030e+003	4.664845e+002	3705	47	1.090121e+001	0	0	0	0	0	0	3684.42	1	1	46.5243	47.3243
DATA	1185	14	80	0	0	A_64_P102886	A_64_P102886	5607.41	277.618	8.773098e+000	8.775945e+000	105.5	45	8.519686e+000	0	0	0	0	0	0	6.83594	0	0	46.8651	44.9667
DATA	1186	14	81	66	1	DarkCorner	DarkCorner	5632.5	277.5	8.782979e+000	8.742886e+000	77	42	9.150653e+000	0	0	0	0	0	0	-22.753	0	0	57.5363	43.0286
DATA	1187	14	82	66	1	DarkCorner	DarkCorner	5657.67	277.5	8.789597e+000	8.749473e+000	79	49	1.111060e+001	0	0	0	0	0	0	-16.7479	0	0	57.5363	46.2308
DATA	1188	14	83	66	1	DarkCorner	DarkCorner	5683.98	277.476	8.793104e+000	8.752964e+000	79	46.5	1.150990e+001	0	0	0	0	0	0	-21.3222	0	0	36.5637	48.3529
DATA	1189	14	84	66	1	DarkCorner	DarkCorner	5709.27	277.818	8.792361e+000	8.752225e+000	78	47	8.078160e+000	0	0	0	0	0	0	-20.0822	0	0	36.9964	47.56
DATA	1190	14	85	66	1	DarkCorner	DarkCorner	5734	277.455	8.789448e+000	8.749325e+000	87	45	9.276431e+000	0	0	0	0	0	0	-9.2945	0	0	55.8519	45.6908
DATA	1191	15	1	66	1	DarkCorner	DarkCorner	3588.71	283.831	7.688809e+000	7.653710e+000	87	45	1.016587e+001	0	0	0	0	0	0	-18.5603	0	0	49.5074	45.2132
DATA	1192	15	2	66	1	DarkCorner	DarkCorner	3613.5	283.648	7.625109e+000	7.590301e+000	77.5	50	1.038337e+001	0	0	0	0	0	0	-25.7325	0	0	57.5363	48.7576
DATA	1193	15	3	66	1	DarkCorner	DarkCorner	3639.23	283.723	7.562717e+000	7.528194e+000	81	51	1.150546e+001	0	0	0	0	0	0	-19.633	0	0	38.6789	51.2195
DATA	1194	15	4	66	1	DarkCorner	DarkCorner	3664.55	284.345	7.504630e+000	7.470372e+000	79	50	6.824227e+000	0	0	0	0	0	0	-22.2711	0	0	41.4593	50.1515
DATA	1195	15	5	66	1	DarkCorner	DarkCorner	3689.58	283.573	7.452625e+000	7.418604e+000	86	51	1.022484e+001	0	0	0	0	0	0	-17.0686	0	0	65	51.7879
DATA	1196	15	6	0	0	A_44_P451392	NM_001108023	3715.09	283.614	6.396647e+002	6.438947e+001	697	54	1.146343e+001	0	0	0	0	0	0	597.999	1	1	57.259	52.8889
DATA	1197	15	7	0	0	A_64_P012661	ENSRNOT00000010298	3740.72	284.485	1.772479e+003	1.773990e+002	1768.5	50	1.005715e+001	0	0	0	0	0	0	1667.8	1	1	45.835	50.2903
DATA	1198	15	8	0	0	A_42_P546058	NM_053670	3766.07	284.433	3.034936e+003	3.035808e+002	2861	48	9.023660e+000	0	0	0	0	0	0	2872.41	1	1	45.835	48.5667
DATA	1199	15	9	0	0	A_42_P695401	NM_031530	3791.5	284.273	1.077437e+002	1.298043e+001	203	52	1.020733e+001	0	0	0	0	0	0	102.527	1	1	46.5243	50.5
DATA	1200	15	10	0	0	A_44_P192193	A_44_P192193	3816.68	284.2	1.414267e+002	1.587148e+001	240	56	1.026930e+001	0	0	0	0	0	0	135.246	1	1	45.4864	53.4615
DATA	1201	15	11	0	0	A_42_P473886	NM_001165922	3842.5	284.375	3.868540e+002	3.934419e+001	472	49	8.186556e+000	0	0	0	0	0	0	371.684	1	1	44.4243	49.6552
DATA	1202	15	12	0	0	A_42_P576953	NM_138882	3867.92	284.222	7.907084e+002	7.939255e+001	853.5	47	9.219544e+000	0	0	0	0	0	0	762.863	1	1	45.4864	47
DATA	1203	15	13	0	0	A_44_P260227	ENSRNOT00000036745	3892.63	283.596	3.431339e+001	7.898687e+000	138	51	8.731200e+000	0	0	0	0	0	0	33.224	1	0	65	53.0769
DATA	1204	15	14	0	0	A_44_P276435	NM_053853	3918.43	284.29	2.954580e+002	3.038445e+001	384.5	53.5	1.183420e+001	0	0	0	0	0	0	287.087	1	1	46.8651	51.625
DATA	1205	15	15	0	0	A_43_P19066	NM_001017494	3943.82	284.164	1.128137e+002	1.331285e+001	212	49.5	1.322262e+001	0	0	0	0	0	0	109.943	1	1	46.1809	52.5313
DATA	1206	15	16	0	0	A_64_P113200	ENSRNOT00000061930	3969.09	283.614	1.275061e+001	7.164988e+000	115	53	1.369666e+001	0	0	0	0	0	0	12.4575	1	0	57.259	51.2069
DATA	1207	15	17	0	0	A_42_P480108	NM_001007637	3994.71	283.894	1.477639e+003	1.479313e+002	1531.5	48	9.936105e+000	0	0	0	0	0	0	1446.97	1	1	45.835	49.7632
DATA	1209	15	19	0	0	A_44_P420046	NM_021669	4045.48	284	3.769737e+001	7.960134e+000	138.5	48.5	8.697365e+000	0	0	0	0	0	0	37.0396	1	1	44.0646	48.9688
DATA	1210	15	20	0	0	A_64_P077021	A_64_P077021	4070.86	284.569	2.912998e+001	7.584166e+000	133	48	7.259159e+000	0	0	0	0	0	0	28.6563	1	0	42.9674	48.1538
DATA	1211	15	21	0	0	A_44_P292558	NM_213559	4096.01	284.309	2.693252e+002	2.782660e+001	372	48	8.004771e+000	0	0	0	0	0	0	265.148	1	1	46.1809	47.8276
DATA	1212	15	22	0	0	A_42_P471653	NM_001031654	4121.41	284.381	2.988815e+001	7.605639e+000	130.5	48	1.047164e+001	0	0	0	0	0	0	29.4386	1	0	45.1352	49.697
DATA	1213	15	23	0	0	A_43_P12000	NM_019272	4147	284.211	4.348438e+002	4.404308e+001	509	48.5	1.045672e+001	0	0	0	0	0	0	428.354	1	1	46.8651	48.6522
DATA	1214	15	24	0	0	A_64_P131395	NM_001037523	4172.65	283.873	7.026614e+000	6.994538e+000	102	49	1.259976e+001	0	0	0	0	0	0	-1.21405	0	0	44.7812	50.9474
DATA	1215	15	25	0	0	A_42_P682853	NM_017193	4197.5	284	9.825503e+002	9.850392e+001	1047	51	8.666667e+000	0	0	0	0	0	0	967.205	1	1	54.1152	52
DATA	1216	15	26	0	0	A_42_P647505	TC640289	4223.35	284.12	4.464956e+003	4.465505e+002	4365	47	1.049908e+001	0	0	0	0	0	0	4391.69	1	1	50.1463	48.6667
DATA	1217	15	27	0	0	A_44_P682959	NM_001025139	4248.8	284.167	7.547517e+000	7.051707e+000	109	49	9.362014e+000	0	0	0	0	0	0	7.4155	1	0	44.4243	48.7742
DATA	1218	15	28	0	0	A_64_P249426	NM_001014271	4274.14	284	1.442013e+001	7.167619e+000	116	50	1.390587e+001	0	0	0	0	0	0	14.148	1	0	43.3362	53.7429
DATA	1219	15	29	0	0	A_64_P133430	NM_001044282	4299.49	284.171	2.950291e+004	2.950299e+003	28271.5	55	1.362620e+001	0	0	0	0	0	0	28898.5	1	1	49.1849	58.56
DATA	1220	15	30	0	0	A_42_P635611	NM_001025685	4324.88	284.449	7.078380e+000	7.046068e+000	91.5	48.5	1.348117e+001	0	0	0	0	0	0	-5.22869	0	0	46.5243	52.9722
DATA	1221	15	31	0	0	A_42_P592013	NM_001127600	4349.86	284.462	2.604848e+003	2.605805e+002	2525	44.5	9.091868e+000	0	0	0	0	0	0	2541.13	1	1	44.7812	46.4
DATA	1222	15	32	0	1	ETG02_36680	ETG02_36680	4375.51	284.4	7.111311e+000	7.078849e+000	96	51.5	1.053205e+001	0	0	0	0	0	0	-5.73946	0	0	45.835	52.8
DATA	1223	15	33	0	0	A_42_P608478	NM_001025131	4400.5	284	7.130508e+000	7.097958e+000	103	51	1.299593e+001	0	0	0	0	0	0	-0.469978	0	0	54.1152	52.4063
DATA	1224	15	34	0	0	A_44_P137397	NM_017236	4426.37	284.296	9.259439e+004	9.259442e+003	90387.5	50	9.983319e+000	0	0	0	0	0	0	89598.4	1	1	47.5395	48.4
DATA	1226	15	36	0	0	A_64_P110789	A_64_P110789	4476.91	284.386	7.198031e+000	7.165173e+000	94.5	52.5	7.674233e+000	0	0	0	0	0	0	-5.01075	0	0	57.259	51.5769
DATA	1227	15	37	0	0	A_64_P061562	A_64_P061562	4502.38	284.63	1.605164e+003	1.606774e+002	1532	51	7.471201e+000	0	0	0	0	0	0	1537.72	1	1	50.7771	50.4167
DATA	1228	15	38	0	0	A_44_P511359	NM_001108736	4527.91	284.554	3.964439e+002	4.029612e+001	464	55	9.899878e+000	0	0	0	0	0	0	378.348	1	1	48.8603	54.5152
DATA	1229	15	39	0	0	A_42_P658220	NM_001109598	4553.44	284.611	2.671799e+003	2.672782e+002	2548	53	1.049301e+001	0	0	0	0	0	0	2539.74	1	1	48.2044	51.3548
DATA	1230	15	40	0	0	A_42_P479096	NM_001008293	4578.63	284.63	1.466326e+003	1.468130e+002	1464.5	50	1.093587e+001	0	0	0	0	0	0	1388.15	1	1	48.2044	49.7714
DATA	1231	15	41	0	0	A_64_P275280	NM_001109569	4604.06	284.389	9.073709e+003	9.074004e+002	8318.5	49	1.547046e+001	0	0	0	0	0	0	8552.84	1	1	48.2044	51.9091
DATA	1232	15	42	0	0	A_42_P785926	NM_001108289	4629.42	284.122	1.274429e+003	1.276541e+002	1271	50	1.197854e+001	0	0	0	0	0	0	1195.9	1	1	48.5334	50.1786
DATA	1233	15	43	0	0	A_64_P005238	A_64_P005238	4654.58	284.427	3.318029e+001	8.086230e+000	128	52	1.250060e+001	0	0	0	0	0	0	30.9955	1	0	57.5363	52.1563
DATA	1234	15	44	0	0	A_42_P555753	NM_001106401	4680.23	284.288	5.209181e+003	5.209708e+002	4812.5	51	1.185067e+001	0	0	0	0	0	0	4842.88	1	1	48.5334	52.0385
DATA	1235	15	45	0	0	A_42_P469751	XM_001054007	4705.53	284.649	2.165638e+003	2.166918e+002	2062	48	1.190142e+001	0	0	0	0	0	0	2003.73	1	1	48.8603	50.3429
DATA	1236	15	46	0	0	A_44_P506124	XM_222590	4731.06	284.621	5.602662e+003	5.603161e+002	5207	59	1.896237e+001	0	0	0	0	1	0	5157.95	1	1	45.4864	59.9063
DATA	1237	15	47	0	0	A_44_P441947	XM_001079870	4756.42	284.427	1.369745e+003	1.371808e+002	1392	52	1.058132e+001	0	0	0	0	0	0	1254.61	1	1	57.5363	52.25
DATA	1238	15	48	0	0	A_64_P127659	NM_001106228	4782.23	284.922	4.904202e+003	4.904784e+002	4554	55	9.239962e+000	0	0	0	0	0	0	4468.78	1	1	49.5074	53.5758
DATA	1239	15	49	0	0	A_42_P733076	NM_001033867	4807.05	284.477	3.273145e+002	3.360200e+001	394.5	49	5.735151e+000	0	0	0	0	0	0	296.709	1	1	55.8519	48.9333
DATA	1240	15	50	0	0	A_64_P145939	NM_001109499	4832.8	284.48	6.216503e+001	9.849737e+000	158	48.5	1.086909e+001	0	0	0	0	0	0	56.0494	1	1	49.5074	49.9048
DATA	1241	15	51	0	0	A_44_P1040796	NM_001106660	4858.44	284.494	1.568977e+004	1.568996e+003	13926	52	1.025923e+001	0	0	0	0	0	0	14069.7	1	1	52.3208	52.3
DATA	1242	15	52	0	0	A_42_P588072	NM_001106829	4883.42	284.427	3.775246e+001	8.596258e+000	132.5	49.5	1.078162e+001	0	0	0	0	0	0	33.6739	1	0	57.5363	47.6176
DATA	1243	15	53	0	0	A_64_P045823	ENSRNOT00000023172	4908.58	284.427	1.958438e+002	2.106750e+001	271.5	50	1.728528e+001	0	0	0	0	0	0	173.744	1	1	57.5363	57.7917
DATA	1244	15	54	0	0	A_42_P591344	NM_001037780	4934.11	284.5	3.513526e+002	3.599228e+001	411.5	49.5	9.698852e+000	0	0	0	0	0	0	309.996	1	1	56.9804	50.4118
DATA	1245	15	55	0	0	A_64_P120322	A_64_P120322	4959.5	284.5	7.886582e+000	7.850580e+000	100	48	1.105077e+001	0	0	0	0	0	0	-1.33295	0	0	57.5363	49.0732
DATA	1246	15	56	0	0	A_64_P062665	NM_001170470	4984.87	284.786	5.098841e+002	5.159577e+001	521	49	9.394805e+000	0	0	0	0	0	0	444.975	1	1	46.5243	49.0645
DATA	1247	15	57	0	0	A_44_P398300	NM_001005538	5010.37	284.5	3.355611e+003	3.356550e+002	2901.5	50	1.016526e+001	0	0	0	0	0	0	2912.22	1	1	47.8731	50.7586
DATA	1248	15	58	0	0	A_64_P001545	ENSRNOT00000029141	5036.06	284.481	4.557853e+004	4.557860e+003	38785.5	52	7.425038e+000	0	0	0	0	0	0	39338.2	1	1	49.5074	51.7419
DATA	1249	15	59	0	0	A_44_P1010653	NM_001109021	5061.44	284.479	6.709909e+003	6.710389e+002	5727	51.5	1.110218e+001	0	0	0	0	0	0	5759.94	1	1	48.2044	51.8824
DATA	1250	15	60	0	0	A_44_P398969	NM_001013225	5086.43	284.681	7.439621e+002	7.483229e+001	738	49.5	1.044379e+001	0	0	0	0	0	0	635.288	1	1	46.8651	49.0357
DATA	1251	15	61	0	0	A_64_P059495	NM_001109986	5112.44	284.973	5.086339e+003	5.086985e+002	4349	50.5	1.138884e+001	0	0	0	0	0	0	4320.01	1	1	48.5334	49.0909
DATA	1252	15	62	0	0	A_64_P037040	A_64_P037040	5137.61	285.129	2.672483e+002	2.794066e+001	325	47	9.052148e+000	0	0	0	0	0	0	225.815	1	1	47.2035	47.3
DATA	1253	15	63	0	0	A_64_P051446	NM_001142942	5162.74	284.778	8.067066e+003	8.067482e+002	6578.5	47	1.119465e+001	0	0	0	0	0	0	6781.3	1	1	47.5395	47.9655
DATA	1254	15	64	0	0	A_42_P701756	NM_001107646	5188.34	284.878	4.840150e+003	4.840851e+002	4055	50	1.204490e+001	0	0	0	0	0	0	4048.11	1	1	48.8603	50.2727
DATA	1255	15	65	0	0	A_44_P172604	NM_031795	5213.77	284.558	3.110018e+003	3.111119e+002	2533	55	9.393942e+000	0	0	0	0	0	0	2588.11	1	1	49.8279	52.3846
DATA	1256	15	66	0	0	A_64_P152000	A_64_P152000	5238.67	284.5	8.355101e+000	8.316961e+000	100	50	1.029891e+001	0	0	0	0	0	0	-2.29084	0	0	57.5363	48.6486
DATA	1257	15	67	0	0	A_44_P339008	NM_001024975	5264.19	284.456	1.081598e+003	1.084821e+002	989.5	53.5	1.256579e+001	0	0	0	0	0	0	891.629	1	1	46.8651	54.3125
DATA	1258	15	68	0	0	A_44_P560070	A_44_P560070	5289.5	284.5	8.432445e+000	8.393952e+000	94.5	50	1.048938e+001	0	0	0	0	0	0	-8.81059	0	0	57.5363	51.973
DATA	1259	15	69	0	0	A_44_P520509	NM_001033868	5315.46	284.882	8.959600e+003	8.959997e+002	7301.5	51	1.059986e+001	0	0	0	0	0	0	7320.6	1	1	49.8279	51.9032
DATA	1260	15	70	0	0	A_42_P643349	NM_001109495	5340.76	285.013	6.139832e+001	1.045789e+001	151	49.5	1.020981e+001	0	0	0	0	0	0	49.9593	1	1	49.1849	50.9667
DATA	1261	15	71	0	0	A_44_P215075	NM_012667	5366.03	285.134	2.903134e+002	3.024990e+001	338	47.5	9.739031e+000	0	0	0	0	0	0	235.296	1	1	46.8651	46.85
DATA	1262	15	72	0	0	A_44_P560363	ENSRNOT00000049736	5391.63	285.114	1.430560e+003	1.433102e+002	1253	45	1.077712e+001	0	0	0	0	0	0	1155.04	1	1	47.2035	47.1714
DATA	1263	15	73	0	0	A_44_P553158	NM_001014014	5416.76	284.69	1.483138e+003	1.485608e+002	1241	46	1.009620e+001	0	0	0	0	0	0	1193.18	1	1	47.5395	48
DATA	1264	15	74	0	0	A_64_P165277	NM_001106370	5442	284.545	8.630627e+000	8.591229e+000	95	53.5	1.351794e+001	0	0	0	0	0	0	-3.22491	0	0	55.8519	52.5952
DATA	1265	15	75	0	0	A_64_P138187	A_64_P138187	5468.12	284.84	8.959915e+002	9.001265e+001	806	47	8.065194e+000	0	0	0	0	0	0	716.189	1	1	48.2044	47.7879
DATA	1266	15	76	0	0	A_44_P429041	XM_227654	5493.19	284.984	2.726875e+002	2.860531e+001	319.5	49	1.005619e+001	0	0	0	0	0	0	217.368	1	1	45.4864	50.2424
DATA	1267	15	77	0	0	A_44_P465880	NM_199389	5518.6	284.829	3.739503e+003	3.740507e+002	3055.5	54	1.387859e+001	0	0	0	0	0	0	2973.22	1	1	51.0895	54.1538
DATA	1268	15	78	0	0	A_44_P381740	NM_001000239	5543.58	284.573	8.723419e+000	8.683597e+000	94	52	1.045253e+001	0	0	0	0	0	0	-3.97229	0	0	57.5363	50.5429
DATA	1269	15	79	0	0	A_64_P045211	NM_001191733	5569	284.545	1.030465e+001	8.761390e+000	105	42	9.684999e+000	0	0	0	0	0	0	8.15857	1	0	55.8519	43.9722
DATA	1270	15	80	0	0	A_64_P010896	A_64_P010896	5594.42	284.573	8.754663e+000	8.714699e+000	92	46.5	9.127865e+000	0	0	0	0	0	0	-6.80097	0	0	57.5363	47.0789
DATA	1271	15	81	0	0	A_42_P566906	NM_001006966	5620.07	284.732	4.895876e+003	4.896654e+002	3854	45	9.951232e+000	0	0	0	0	0	0	3865.06	1	1	47.5395	44.973
DATA	1272	15	82	66	1	DarkCorner	DarkCorner	5645.42	284.573	8.774256e+000	8.734202e+000	80	49	9.094867e+000	0	0	0	0	0	0	-18.5513	0	0	57.5363	46.3846
DATA	1273	15	83	66	1	DarkCorner	DarkCorner	5671.12	284.737	8.779015e+000	8.738940e+000	80	42.5	1.011788e+001	0	0	0	0	0	0	-19.7924	0	0	42.5954	44.5
DATA	1274	15	84	66	1	DarkCorner	DarkCorner	5696.59	284.97	8.780229e+000	8.740148e+000	78	46	7.752800e+000	0	0	0	0	0	0	-17.0337	0	0	45.4864	44.9655
DATA	1275	15	85	66	1	DarkCorner	DarkCorner	5721.65	284.826	8.778664e+000	8.738590e+000	81	45	6.300193e+000	0	0	0	0	0	0	-13.2802	0	0	37.847	45.8857
DATA	1276	16	1	66	1	DarkCorner	DarkCorner	3601.3	291.234	7.645673e+000	7.610771e+000	89	45.5	1.190369e+001	0	0	0	0	0	0	-15.977	0	0	45.1352	48.3824
DATA	1277	16	2	66	1	DarkCorner	DarkCorner	3626.42	291.453	7.583039e+000	7.548423e+000	85	46	1.042605e+001	0	0	0	0	0	0	-16.2768	0	0	40.6843	47.439
DATA	1278	16	3	66	1	DarkCorner	DarkCorner	3652.11	290.906	7.523987e+000	7.489640e+000	80.5	49.5	7.695694e+000	0	0	0	0	0	0	-18.5454	0	0	41.0736	48.4412
DATA	1279	16	4	66	1	DarkCorner	DarkCorner	3677.54	291.351	7.468183e+000	7.434091e+000	82	49	9.730861e+000	0	0	0	0	0	0	-19.3735	0	0	42.2201	49.7586
DATA	1280	16	5	0	0	A_42_P708614	NM_001130505	3702.5	291	6.061430e+004	6.061434e+003	55397	53	9.699326e+000	0	0	0	0	0	0	56546.2	1	1	54.1152	49.3333
DATA	1281	16	6	0	0	A_44_P427177	NM_053923	3727.58	291.427	7.370215e+000	7.336571e+000	103	51	9.692946e+000	0	0	0	0	0	0	-1.79144	0	0	57.5363	52.1034
DATA	1282	16	7	0	0	A_44_P417051	NM_001024886	3753.42	291.427	4.441391e+001	8.537785e+000	141.5	52.5	1.034108e+001	0	0	0	0	0	0	41.9588	1	1	57.5363	51.6
DATA	1283	16	8	0	0	A_64_P052917	ENSRNOT00000029053	3778.5	291.352	1.618379e+001	7.429829e+000	116	45	1.075438e+001	0	0	0	0	0	0	15.374	1	0	57.5363	49.36
DATA	1284	16	9	0	0	A_42_P689013	NM_053800	3804.13	291.377	2.039698e+004	2.039711e+003	18865	54	1.041537e+001	0	0	0	0	0	0	19478.1	1	1	46.8651	51.8125
DATA	1285	16	10	0	0	A_42_P668072	NM_013130	3829.5	291.352	3.358153e+002	3.434038e+001	418	50	1.155616e+001	0	0	0	0	0	0	322.215	1	1	57.5363	50.8
DATA	1286	16	11	0	0	A_44_P762596	XM_237156	3855.36	291.7	3.894604e+002	3.959643e+001	469	53	9.740215e+000	0	0	0	0	0	0	375.364	1	1	47.8731	50.8889
DATA	1287	16	12	0	0	A_44_P673662	TC577636	3880.49	291.356	3.473204e+001	7.921733e+000	136	48	6.167658e+000	0	0	0	0	0	0	33.6043	1	0	48.5334	47.04
DATA	1288	16	13	0	0	A_42_P674598	NM_013067	3905.5	291.352	4.977267e+004	4.977273e+003	47764	53	9.409948e+000	0	0	0	0	0	0	48325.3	1	1	57.5363	52.9333
DATA	1289	16	14	0	0	A_44_P529994	NM_001191720	3930.86	291.739	7.104609e+000	7.072966e+000	106	49	1.066616e+001	0	0	0	0	0	0	1.02849	0	0	46.1809	49.7273
DATA	1290	16	15	0	0	A_42_P655644	NM_133618	3956.44	291.521	1.464777e+003	1.466474e+002	1517	49	1.271996e+001	0	0	0	0	0	0	1430.71	1	1	48.2044	48.4063
DATA	1291	16	16	0	0	A_42_P589674	NM_001044225	3981.99	291.616	9.102921e+003	9.103192e+002	8860	53	1.082135e+001	0	0	0	0	0	0	8912.77	1	1	48.8603	51.6111
DATA	1292	16	17	0	0	A_64_P010139	A_64_P010139	4007.87	291.92	2.660133e+002	2.751222e+001	362.5	48	9.373842e+000	0	0	0	0	0	0	261.004	1	1	47.8731	49.1143
DATA	1293	16	18	0	0	A_42_P586883	NM_001106416	4032.77	291.69	5.008562e+001	8.615069e+000	151	47	1.077790e+001	0	0	0	0	0	0	49.2212	1	1	47.5395	48.8857
DATA	1294	16	19	0	0	A_42_P461144	DV724416	4058.25	291.373	2.070102e+003	2.071285e+002	2103	51	9.578721e+000	0	0	0	0	0	0	2036.97	1	1	46.1809	51.5758
DATA	1295	16	20	0	0	A_64_P130565	NM_031668	4083.58	291.484	2.045916e+002	2.162152e+001	304	44	8.474337e+000	0	0	0	0	0	0	201.513	1	1	43.7019	44.7576
DATA	1296	16	21	0	0	A_64_P002826	NM_001134527	4108.58	291.427	1.115154e+002	1.316094e+001	212	48	1.049603e+001	0	0	0	0	0	0	109.905	1	1	57.5363	49
DATA	1298	16	23	0	0	A_64_P036099	A_64_P036099	4159.72	291.84	3.049729e+003	3.050529e+002	3134	50	1.061666e+001	0	0	0	0	0	0	3006.62	1	1	49.1849	51.0278
DATA	1299	16	24	0	0	A_64_P080580	ENSRNOT00000040473	4185.06	292.175	9.753754e+002	9.778766e+001	1078.5	50	8.747125e+000	0	0	0	0	0	0	961.29	1	1	45.4864	52.2927
DATA	1300	16	25	0	0	A_43_P12276	NM_022636	4210.71	291.723	9.931609e+001	1.214742e+001	198.5	49	1.000101e+001	0	0	0	0	0	0	97.8121	1	1	45.1352	50.5429
DATA	1301	16	26	0	0	A_42_P505393	NM_199085	4236.13	291.465	5.990958e+002	6.031730e+001	685	47	9.357583e+000	0	0	0	0	0	0	589.442	1	1	47.8731	47.4333
DATA	1302	16	27	0	0	A_44_P883619	ENSRNOT00000032374	4261.11	291.5	7.042086e+000	7.009939e+000	101	50	1.097951e+001	0	0	0	0	0	0	-1.23458	0	0	65	50.4571
DATA	1303	16	28	0	0	A_44_P493894	ENSRNOT00000050156	4286.9	291.387	1.601750e+005	1.601750e+004	155858	50.5	1.141183e+001	0	0	0	0	0	0	157156	1	1	50.1463	51.3333
DATA	1304	16	29	0	0	A_64_P085334	TC585414	4311.74	291.77	1.437522e+004	1.437539e+003	13560	54	1.974041e+001	0	0	0	0	0	0	14080	1	1	48.8603	58.6061
DATA	1306	16	31	0	0	A_64_P045433	A_64_P045433	4363.06	292.031	5.166135e+003	5.166618e+002	5121	49	1.195763e+001	0	0	0	0	0	0	5037.84	1	1	46.8651	50.4194
DATA	1307	16	32	0	0	A_64_P025351	AY724474	4388.43	291.704	3.798207e+004	3.798213e+003	36460	51	1.020046e+001	0	0	0	0	0	0	36942.5	1	1	51.0895	51.129
DATA	1308	16	33	0	0	A_44_P501626	ENSRNOT00000050744	4413.5	291.5	7.134789e+000	7.119258e+000	105.5	50.5	9.281736e+000	0	0	0	0	0	0	4.77456	0	0	57.5363	48.9706
DATA	1309	16	34	0	0	A_64_P071525	NM_001000141	4438.67	291.5	7.156255e+000	7.123588e+000	100	50	1.220920e+001	0	0	0	0	0	0	-1.93364	0	0	57.5363	52.2308
DATA	1310	16	35	0	0	A_64_P006545	A_64_P006545	4464.43	291.761	2.203678e+004	2.203689e+003	21046	59	1.263961e+001	0	0	0	0	0	0	21240.2	1	1	46.5243	58.9545
DATA	1311	16	36	0	0	A_64_P089561	NM_001044265	4489.5	291.5	4.740208e+001	8.596578e+000	144	48.5	7.565149e+000	0	0	0	0	0	0	45.5314	1	1	57.5363	49.25
DATA	1312	16	37	0	0	A_44_P791108	NM_001014070	4515.11	291.5	2.882879e+001	7.753944e+000	129	54.5	9.565503e+000	0	0	0	0	0	0	27.5891	1	0	65	55.4667
DATA	1313	16	38	0	0	A_44_P161535	A_44_P161535	4540.87	292.233	9.317013e+003	9.317293e+002	9104	51	9.794460e+000	0	0	0	0	0	0	8882.38	1	1	44.4243	51.5625
DATA	1314	16	39	0	0	A_44_P299136	NM_001108539	4565.97	292.104	3.155754e+002	3.238067e+001	390	47	1.114676e+001	0	0	0	0	0	0	299.653	1	1	46.8651	47.4211
DATA	1315	16	40	1028	1	(+)E1A_r60_a97	E1A_r60_a97	4591.33	291.5	7.319079e+000	7.285668e+000	89	47	1.360772e+001	0	0	0	0	0	0	-9.5518	0	0	57.5363	48.7931
DATA	1316	16	41	0	0	A_44_P161723	NM_001134526	4616.5	291.5	1.403424e+002	1.582725e+001	235	47.5	1.081516e+001	0	0	0	0	0	0	132.121	1	1	57.5363	49
DATA	1317	16	42	0	0	A_64_P121443	A_64_P121443	4642	291.545	7.384117e+000	7.350410e+000	93	52	1.144608e+001	0	0	0	0	0	0	-3.00591	0	0	55.8519	51.5667
DATA	1318	16	43	0	0	A_42_P771373	NM_012614	4667.48	291.849	1.824484e+004	1.824498e+003	16502.5	52	1.403023e+001	0	0	0	1	0	0	17019.5	1	1	47.8731	53.7742
DATA	1319	16	44	0	0	A_44_P1025944	NM_147140	4693	291.809	1.597366e+004	1.597383e+003	14577	47	1.147705e+001	0	0	0	0	0	0	14829.4	1	1	46.8651	49.5484
DATA	1320	16	45	0	0	A_64_P014085	NM_001007678	4718.39	292.129	1.180923e+003	1.183275e+002	1145	47	1.119400e+001	0	0	0	0	0	0	1091.02	1	1	47.2035	48.0667
DATA	1321	16	46	0	0	A_64_P095298	NM_001047963	4743.58	291.573	4.297203e+001	8.638556e+000	137	51	1.231829e+001	0	0	0	0	0	0	39.5008	1	1	57.5363	54.0976
DATA	1322	16	47	0	0	A_64_P122037	A_64_P122037	4769.22	292.154	3.123128e+004	3.123137e+003	28009	54	7.546629e+000	0	0	0	0	0	0	28563.3	1	1	45.835	53.125
DATA	1323	16	48	0	0	A_64_P098094	A_64_P098094	4794.94	291.771	9.553026e+004	9.553029e+003	86811	52	1.111722e+001	0	0	0	0	0	0	86906.4	1	1	51.0895	53.5
DATA	1324	16	49	0	0	A_44_P353708	ENSRNOT00000033510	4819.94	292.113	6.118272e+001	9.765351e+000	159.5	48	1.260339e+001	0	0	0	0	0	0	55.3746	1	1	45.1352	49.975
DATA	1325	16	50	0	0	A_42_P541669	ENSRNOT00000043345	4845.58	292.101	9.980628e+002	1.000992e+002	1004	49	1.154494e+001	0	0	0	0	0	0	898.466	1	1	47.2035	49
DATA	1326	16	51	0	0	A_42_P560894	NM_019138	4870.8	292.141	7.253563e+003	7.253971e+002	6589	49	7.974510e+000	0	0	0	0	0	0	6494.97	1	1	45.4864	49.0303
DATA	1327	16	52	0	0	A_42_P498066	NM_031136	4896	291.545	9.797675e+004	9.797678e+003	87267	50	1.206261e+001	0	0	0	0	0	0	87251.3	1	1	55.8519	51.8929
DATA	1328	16	53	0	0	A_42_P538928	NM_053021	4921.51	292.125	3.047034e+004	3.047044e+003	26572	53	1.712756e+001	0	0	0	1	0	0	26988.9	1	1	47.8731	57.7407
DATA	1329	16	54	0	0	A_64_P302169	NM_001099493	4946.61	292.136	2.367001e+001	8.169698e+000	120	47.5	1.091392e+001	0	0	0	0	0	0	20.8526	1	0	42.9674	47.8409
DATA	1330	16	55	0	0	A_43_P18282	NM_001173436	4972.41	292.344	5.109534e+001	9.377020e+000	146	50	9.935308e+000	0	0	0	0	0	0	44.7653	1	1	45.1352	50.6765
DATA	1331	16	56	0	0	A_44_P304169	NM_001000482	4997.8	292.033	1.751777e+002	1.921926e+001	262.5	47.5	8.145600e+000	0	0	0	0	0	0	152.631	1	1	45.1352	48.3125
DATA	1332	16	57	0	0	A_44_P318932	XM_231081	5023.22	292.169	5.870412e+003	5.870951e+002	4994.5	51	8.972838e+000	0	0	0	0	0	0	5087.11	1	1	45.835	50.3871
DATA	1333	16	58	0	0	A_64_P124621	A_64_P124621	5048.42	291.573	4.456011e+001	9.151133e+000	144	54	9.174938e+000	0	0	0	0	0	0	38.4033	1	1	65	52.8889
DATA	1334	16	59	0	0	A_42_P553960	NM_001107831	5074	292.226	1.260863e+004	1.260889e+003	10535	50	1.091541e+001	0	0	0	0	0	0	10809	1	1	45.4864	50.8286
DATA	1335	16	60	0	0	A_64_P129459	A_64_P129459	5099.37	292.265	8.899056e+002	8.935647e+001	853.5	46	8.047782e+000	0	0	0	0	0	0	758.843	1	1	46.5243	44.3043
DATA	1336	16	61	0	0	A_64_P083224	ENSRNOT00000017383	5124.5	291.648	2.593277e+001	8.525339e+000	121	49	9.300148e+000	0	0	0	0	0	0	21.9963	1	0	65	48.1667
DATA	1337	16	62	0	0	A_64_P031840	NM_001017445	5150.27	292.357	1.840792e+003	1.842601e+002	1623.5	46.5	1.192283e+001	0	0	0	0	0	0	1553.38	1	1	46.8651	50.9231
DATA	1338	16	63	0	0	A_43_P16427	NM_001191000	5175.42	291.573	3.189957e+001	8.803765e+000	128	48.5	1.044504e+001	0	0	0	0	0	0	26.7798	1	0	57.5363	47.2667
DATA	1339	16	64	0	0	A_64_P159034	NM_001191681	5201.09	292.328	3.279546e+004	3.279557e+003	27145.5	50	9.762230e+000	0	0	0	0	0	0	27397.3	1	1	45.1352	50.3636
DATA	1340	16	65	0	0	A_64_P009007	A_64_P009007	5226.09	291.935	4.543714e+001	9.450041e+000	134	50	9.441005e+000	0	0	0	0	0	0	37.7741	1	1	54.4085	47.5152
DATA	1341	16	66	0	0	A_42_P489817	NM_001107681	5251.63	292	4.478128e+003	4.478902e+002	3716.5	51.5	8.877866e+000	0	0	0	0	0	0	3705.25	1	1	46.5243	50.3158
DATA	1342	16	67	0	0	A_42_P643272	NM_053389	5276.88	292.061	3.170267e+003	3.171370e+002	2583	50	1.088661e+001	0	0	0	0	0	0	2611.2	1	1	46.5243	50.4615
DATA	1343	16	68	0	0	A_64_P076063	XM_001061753	5302.64	292.015	8.357940e+001	1.185053e+001	170	48	7.034191e+000	0	0	0	0	0	0	68.5311	1	1	45.4864	48.5625
DATA	1344	16	69	0	0	A_64_P047371	NM_001109423	5327.91	292.104	2.907061e+003	2.908285e+002	2499	48	1.010472e+001	0	0	0	0	0	0	2373.61	1	1	46.8651	49.5185
DATA	1345	16	70	0	0	A_44_P991940	XM_225667	5353	292	1.895284e+002	2.075974e+001	255	48	1.085450e+001	0	0	0	0	0	0	154.124	1	1	54.9904	49.0571
DATA	1346	16	71	0	0	A_42_P667802	ENSRNOT00000014585	5378.93	292.2	1.444294e+002	1.676067e+001	217	48	9.599520e+000	0	0	0	0	0	0	116.991	1	1	46.8651	47.1053
DATA	1347	16	72	0	0	A_44_P433942	A_44_P433942	5404.21	292.074	4.048533e+001	9.446960e+000	134.5	45	1.040777e+001	0	0	0	0	0	0	32.6737	1	0	46.5243	46.4688
DATA	1348	16	73	0	0	A_42_P735279	NM_001004446	5429.5	292	3.501277e+004	3.501287e+003	27721	48	1.174185e+001	0	0	0	0	0	0	28160.1	1	1	48.5334	48
DATA	1349	16	74	0	0	A_64_P000316	A_64_P000316	5454.88	292.061	7.795576e+001	1.160159e+001	160.5	48	1.095068e+001	0	0	0	0	0	0	62.499	1	1	46.5243	47.675
DATA	1350	16	75	0	0	A_64_P073357	XM_001070426	5480.25	292.048	7.856153e+001	1.166109e+001	163.5	47.5	7.731267e+000	0	0	0	0	0	0	62.7995	1	1	45.4864	46.9286
DATA	1351	16	76	0	0	A_42_P501972	NM_001025418	5505.76	291.971	4.690914e+002	4.769834e+001	469	49	1.258981e+001	0	0	0	1	0	0	373.964	1	1	46.1809	51.6452
DATA	1352	16	77	0	0	A_64_P030824	ENSRNOT00000002002	5530.5	292	8.107647e+001	1.186366e+001	166	53.5	9.760898e+000	0	0	0	0	0	0	64.4847	1	1	54.1152	51.6429
DATA	1353	16	78	0	0	A_42_P537715	NM_001025743	5556.56	292.027	2.944156e+003	2.945435e+002	2349	49	1.311283e+001	0	0	0	0	0	0	2336.63	1	1	48.5334	50.3714
DATA	1354	16	79	0	0	A_44_P596424	TC642059	5582.14	292.192	5.721702e+002	5.787390e+001	557	45	1.134017e+001	0	0	0	0	0	0	453.305	1	1	47.5395	46.625
DATA	1355	16	80	0	0	A_42_P528891	XM_001074805	5607	292	4.764574e+002	4.843490e+001	477	44	8.330715e+000	0	0	0	1	0	0	376.924	1	1	54.9904	43.6154
DATA	1356	16	81	0	0	A_64_P130516	A_64_P130516	5632.9	292.171	8.504988e+001	1.217885e+001	163	46	1.010669e+001	0	0	0	0	0	0	67.2087	1	1	46.8651	47.1707
DATA	1357	16	82	66	1	DarkCorner	DarkCorner	5658.83	292.227	8.763786e+000	8.723780e+000	80.5	44	9.486264e+000	0	0	0	0	0	0	-17.1957	0	0	45.835	45.5641
DATA	1358	16	83	66	1	DarkCorner	DarkCorner	5683.42	292.427	8.766651e+000	8.726632e+000	82	46	8.341857e+000	0	0	0	0	0	0	-17.479	0	0	57.5363	44.4091
DATA	1359	16	84	66	1	DarkCorner	DarkCorner	5708.5	292.352	8.766789e+000	8.726770e+000	78	48	6.003471e+000	0	0	0	0	0	0	-15.1849	0	0	65	47.0417
DATA	1360	16	85	66	1	DarkCorner	DarkCorner	5735.15	292.255	8.763195e+000	8.723192e+000	84	43	8.877702e+000	0	0	0	0	0	0	-11.6668	0	0	41.8414	43.5249
DATA	1361	17	1	66	1	DarkCorner	DarkCorner	3588.4	298.643	7.668878e+000	7.633871e+000	83.5	43.5	9.030844e+000	0	0	0	0	0	0	-18.0375	0	0	47.8731	44.2154
DATA	1362	17	2	66	1	DarkCorner	DarkCorner	3613.68	298.74	7.604383e+000	7.569670e+000	86	44	1.063466e+001	0	0	0	0	0	0	-17.301	0	0	39.8942	47.1034
DATA	1363	17	3	66	1	DarkCorner	DarkCorner	3639.77	298.738	7.542139e+000	7.507710e+000	86	50	1.085733e+001	0	0	0	0	0	0	-13.3206	0	0	44.4243	47.8571
DATA	1364	17	4	66	1	DarkCorner	DarkCorner	3665.51	298.149	7.485471e+000	7.451301e+000	79	49	7.297536e+000	0	0	0	0	0	0	-22.1606	0	0	38.2652	48.1875
DATA	1365	17	5	0	0	A_44_P434817	NM_001012187	3689.96	299.118	4.941446e+003	4.942000e+002	4581.5	53	1.104517e+001	0	0	0	0	0	0	4600.28	1	1	46.8651	50.0645
DATA	1366	17	6	0	0	A_64_P153319	A_64_P153319	3715.11	298.5	8.490986e+002	8.522751e+001	909	48.5	1.289845e+001	0	0	0	0	0	0	795.628	1	1	65	49.7813
DATA	1367	17	7	0	0	A_64_P034394	XM_218828	3740.5	298.5	7.339401e+000	7.338638e+000	107	50	1.113764e+001	0	0	0	0	0	0	6.52889	0	0	57.5363	50.2
DATA	1368	17	8	0	0	A_64_P001399	A_64_P001399	3766	299.226	1.326441e+004	1.326460e+003	12350	50.5	1.044734e+001	0	0	0	0	0	0	12581	1	1	45.4864	49.9643
DATA	1369	17	9	0	0	A_42_P712191	NM_001109207	3791.33	298.5	2.056354e+002	2.179578e+001	307	47	1.047981e+001	0	0	0	0	0	0	196.067	1	1	57.5363	48.3667
DATA	1370	17	10	0	0	A_44_P746633	NM_001109580	3816.77	298.884	1.630758e+004	1.630774e+003	15423	49	1.060694e+001	0	0	0	0	0	0	15626.8	1	1	46.5243	49.2593
DATA	1371	17	11	0	0	A_42_P772157	NM_017020	3842.27	298.7	1.382776e+003	1.384626e+002	1390.5	54	1.353732e+001	0	0	0	0	0	0	1331.07	1	1	47.2035	54.9583
DATA	1372	17	12	0	0	A_44_P407543	NM_001024996	3867.5	298.5	1.240997e+002	1.431093e+001	223	49	9.010078e+000	0	0	0	0	0	0	119.946	1	1	57.5363	48.2286
DATA	1374	17	14	0	0	A_64_P057225	NM_001008857	3918.33	298.5	1.773957e+002	1.909906e+001	277	53	1.534737e+001	0	0	0	0	0	0	172.676	1	1	57.5363	53.6667
DATA	1375	17	15	0	0	A_42_P462015	NM_001011943	3943.33	299.302	4.684123e+002	4.736963e+001	557.5	43	6.604472e+000	0	0	0	0	0	0	457.322	1	1	44.4243	43.7143
DATA	1376	17	16	0	0	A_42_P596050	NM_053572	3969.25	298.877	8.072559e+002	8.103177e+001	877	49.5	1.180448e+001	0	0	0	0	0	0	790.174	1	1	47.8731	49.4063
DATA	1377	17	17	0	0	A_44_P213776	NM_052829	3994.5	298.5	9.470357e+001	1.178992e+001	195.5	52	9.482321e+000	0	0	0	0	0	0	92.8983	1	1	57.5363	52.5946
DATA	1378	17	18	0	0	A_64_P004468	A_64_P004468	4020.14	299	3.415472e+003	3.416191e+002	3470	46	1.222309e+001	0	0	0	0	0	0	3356.77	1	1	42.5954	49.2414
DATA	1379	17	19	0	0	A_44_P290394	NM_053580	4045.28	299.033	3.674459e+003	3.675126e+002	3599	50.5	1.147644e+001	0	0	0	0	0	0	3616.6	1	1	44.7812	52.9688
DATA	1380	17	20	0	0	A_64_P076911	XM_215948	4070.37	298.397	6.066060e+001	9.256217e+000	161	48	7.986163e+000	0	0	0	0	0	0	59.7679	1	1	48.5334	47.7105
DATA	1381	17	21	0	0	A_64_P155895	NM_001009658	4096.09	299.328	4.041141e+003	4.041744e+002	3997.5	48	1.095549e+001	0	0	0	0	0	0	3985.27	1	1	45.1352	48.9091
DATA	1382	17	22	0	0	A_43_P16338	ENSRNOT00000034555	4121.68	299.092	7.034977e+001	9.911673e+000	169	47.5	7.827449e+000	0	0	0	0	0	0	69.4069	1	1	45.835	47.2
DATA	1383	17	23	0	0	A_42_P716283	NM_001107983	4147	299.424	1.130646e+003	1.132800e+002	1179	48	1.175155e+001	0	0	0	0	0	0	1115.67	1	1	45.4864	49.0323
DATA	1384	17	24	0	0	A_43_P13355	NM_139082	4171.98	299.246	2.803819e+002	2.889455e+001	379	51	9.513318e+000	0	0	0	0	0	0	276.611	1	1	45.4864	52.6452
DATA	1385	17	25	0	0	A_64_P126065	NM_001005900	4197.78	299	9.175448e+001	1.153240e+001	192	50	8.830954e+000	0	0	0	0	0	0	90.4719	1	1	43.3362	51.8824
DATA	1386	17	26	0	0	A_44_P838532	NM_001107144	4223.51	299.138	9.881065e+002	9.905772e+001	1100	47.5	1.143529e+001	0	0	0	0	0	0	973.512	1	1	45.1352	49.1071
DATA	1387	17	27	0	0	A_42_P785861	NM_001009422	4248.77	298.884	3.448068e+003	3.448778e+002	3416	49	9.228641e+000	0	0	0	0	0	0	3393.32	1	1	46.5243	48.7333
DATA	1388	17	28	0	0	A_42_P641962	NM_012999	4274.16	299.302	5.197601e+003	5.198074e+002	5045	48	1.045110e+001	0	0	0	0	0	0	5108.23	1	1	45.1352	49.5556
DATA	1389	17	29	0	0	A_64_P085201	TC633318	4299.42	298.573	1.138388e+002	1.337501e+001	215	54	1.983796e+001	0	0	0	0	1	0	111.687	1	1	57.5363	59.7692
DATA	1390	17	30	0	0	A_64_P015687	NM_053573	4324.62	299.282	4.425286e+003	4.425845e+002	4182	47	1.393310e+001	0	0	0	0	0	0	4333.69	1	1	47.5395	51.7419
DATA	1391	17	31	0	0	A_64_P078332	NM_012794	4350.36	299.25	5.039797e+003	5.040290e+002	4925.5	47	1.031585e+001	0	0	0	0	0	0	4924.53	1	1	49.8279	49
DATA	1392	17	32	0	0	A_42_P637189	NM_031612	4375.36	299.318	8.970827e+003	8.971105e+002	8451	46	1.181204e+001	0	0	0	0	0	0	8744.69	1	1	45.835	46.2963
DATA	1393	17	33	0	0	A_42_P602472	NM_001008290	4400.58	298.573	4.120191e+003	4.120801e+002	4049.5	51	9.973981e+000	0	0	0	0	0	0	4005.32	1	1	57.5363	49.1379
DATA	1394	17	34	0	0	A_64_P003749	NM_031799	4426.42	298.573	1.978943e+002	2.102696e+001	289	52	8.448099e+000	0	0	0	0	0	0	191.808	1	1	57.5363	49.2963
DATA	1395	17	35	0	0	A_42_P785861	NM_001009422	4451.7	298.9	3.542437e+003	3.543155e+002	3502	56	1.368274e+001	0	0	0	0	0	0	3422.92	1	1	47.2035	56.5
DATA	1396	17	36	0	0	A_64_P138889	NM_001013050	4476.85	299.182	5.168825e+003	5.169320e+002	4914	49	7.065690e+000	0	0	0	0	0	0	4978.08	1	1	46.1809	49.5789
DATA	1397	17	37	0	0	A_44_P409820	NM_012908	4502.42	298.573	6.087643e+001	9.412363e+000	152	53	1.114129e+001	0	0	0	0	0	0	58.4164	1	1	57.5363	55.4118
DATA	1398	17	38	0	0	A_44_P529880	ENSRNOT00000033370	4527.58	298.573	7.238396e+000	7.205353e+000	88	57	8.585369e+000	0	0	0	0	0	0	-10.2723	0	0	65	57.5588
DATA	1399	17	39	0	0	A_64_P084851	ENSRNOT00000029593	4553.37	298.596	1.284504e+002	1.474205e+001	224.5	50	9.444575e+000	0	0	0	0	0	0	122.314	1	1	57.8122	49.6667
DATA	1400	17	40	0	0	A_44_P654068	NM_001114402	4578.89	299.457	6.064656e+002	6.107995e+001	657	48.5	1.200134e+001	0	0	0	0	0	0	575.178	1	1	46.8651	49.2941
DATA	1401	17	41	0	0	A_64_P094855	NM_001109591	4604.17	299.323	1.797752e+003	1.799231e+002	1812.5	48	1.663833e+001	0	0	0	0	0	0	1697.74	1	1	45.4864	52.4615
DATA	1402	17	42	0	0	A_42_P516658	NM_001024888	4629.57	299.103	4.303184e+002	4.365115e+001	517	47	1.289696e+001	0	0	0	0	0	0	404.574	1	1	46.5243	49.8235
DATA	1403	17	43	0	0	A_64_P092394	ENSRNOT00000064749	4654.84	299.081	1.876517e+001	7.595756e+000	117.5	51	1.308574e+001	0	0	0	0	0	0	17.5625	1	0	45.1352	53.6452
DATA	1404	17	44	0	0	A_44_P280755	NM_148890	4680.09	298.935	4.545720e+001	8.680374e+000	140	47.5	1.168220e+001	0	0	0	0	0	0	42.3444	1	1	65	48.9231
DATA	1405	17	45	0	0	A_42_P629062	AF072835	4705.59	299.042	7.346740e+002	7.384223e+001	760	46	1.097888e+001	0	0	0	0	0	0	681.068	1	1	48.2044	49.0833
DATA	1406	17	46	0	0	A_64_P131141	ENSRNOT00000012638	4730.91	298.935	7.343178e+001	1.047313e+001	169.5	49	1.132876e+001	0	0	0	0	0	0	67.7385	1	1	54.4085	50.1818
DATA	1407	17	47	0	0	A_42_P756350	NM_021772	4756.82	299.162	9.734624e+001	1.229229e+001	192	54	8.834330e+000	0	0	0	0	0	0	89.3408	1	1	47.8731	53.1143
DATA	1408	17	48	66	-1	(-)3xSLv1	NegativeControl	4781.5	299	7.578113e+000	7.543519e+000	87	50	1.081639e+001	0	0	0	0	0	0	-9.73071	0	0	54.1152	52.0741
DATA	1409	17	49	0	0	A_64_P124796	A_64_P124796	4807	299	2.410689e+001	7.957061e+000	122	48	1.205424e+001	0	0	0	0	0	0	21.899	1	0	54.9904	49.027
DATA	1410	17	50	0	0	A_44_P288443	NM_001108878	4832.94	298.987	5.208971e+002	5.264471e+001	573.5	48	1.409255e+001	0	0	0	0	0	0	470.642	1	1	48.5334	49.8333
DATA	1411	17	51	0	0	A_42_P748004	NM_001135873	4858.17	299	2.135963e+003	2.137337e+002	1993	49	8.713850e+000	0	0	0	0	0	0	1919.68	1	1	46.8651	48.2581
DATA	1412	17	52	0	0	A_64_P067310	NM_001139507	4884	299.23	1.083185e+003	1.085923e+002	1086	52	9.125804e+000	0	0	0	0	0	0	968.217	1	1	44.7812	50.697
DATA	1413	17	53	0	0	A_44_P210809	NM_001107334	4908.5	299	1.724717e+002	1.890726e+001	252	54	1.340733e+001	0	0	0	0	0	0	153.356	1	1	54.1152	56.8571
DATA	1414	17	54	1028	1	(+)E1A_r60_a104	E1A_r60_a104	4934	299	7.825415e+000	7.789693e+000	90	49	1.122847e+001	0	0	0	0	0	0	-9.2009	0	0	54.9904	48.75
DATA	1415	17	55	0	0	A_44_P1042711	NM_001108426	4959.85	299.418	1.036400e+002	1.299083e+001	194.5	48	1.028253e+001	0	0	0	0	0	0	91.149	1	1	45.835	48.3415
DATA	1416	17	56	0	0	A_42_P661992	TC596141	4984.61	299.069	2.349161e+002	2.477636e+001	307.5	46.5	6.255090e+000	0	0	0	0	0	0	205.496	1	1	53.8203	47.3846
DATA	1417	17	57	0	0	A_42_P565621	NM_001105971	5010.57	299.239	1.376589e+002	1.588090e+001	219.5	44.5	8.670939e+000	0	0	0	1	0	0	119.753	1	1	46.5243	48
DATA	1418	17	58	0	0	A_44_P264600	NM_001013132	5035.5	299	1.583161e+002	1.772059e+001	242	50	1.079899e+001	0	0	0	0	0	0	136.987	1	1	54.1152	49.1944
DATA	1419	17	59	0	0	A_64_P034901	TC591400	5061	299	8.041017e+000	8.004311e+000	97.5	52	9.665524e+000	0	0	0	0	0	0	-2.78508	0	0	54.9904	49.2121
DATA	1420	17	60	0	0	A_42_P468216	NM_001030026	5086.32	299.348	4.208844e+003	4.209613e+002	3623.5	46.5	1.022104e+001	0	0	0	1	0	0	3603.14	1	1	45.835	46.6071
DATA	1421	17	61	0	0	A_64_P062855	XM_343708	5111.58	299.427	1.882665e+001	8.305019e+000	117	52	1.016048e+001	0	0	0	0	0	0	16.0331	1	0	57.5363	48.8824
DATA	1422	17	62	0	0	A_64_P048421	AABR03055399	5137.42	299.427	8.169057e+000	8.131765e+000	94	43	8.477723e+000	0	0	0	0	0	0	-7.90797	0	0	57.5363	44.2222
DATA	1423	17	63	0	0	A_44_P342166	NM_013187	5162.78	299.278	1.522368e+002	1.727916e+001	229.5	45	1.096588e+001	0	0	0	1	0	0	128.302	1	1	47.8731	48.1471
DATA	1424	17	64	0	0	A_42_P748154	XM_001059949	5188.19	299.412	4.493829e+003	4.494579e+002	3799	45	1.060959e+001	0	0	0	1	0	0	3768.4	1	1	46.5243	46.3684
DATA	1425	17	65	0	0	A_64_P157763	A_64_P157763	5213.59	299.28	2.571166e+003	2.572491e+002	2120	50	1.107977e+001	0	0	0	0	0	0	2145.5	1	1	48.8603	48.8065
DATA	1426	17	66	0	0	A_64_P155645	NM_022706	5239.22	299.312	1.320816e+004	1.320842e+003	10623	47.5	9.566310e+000	0	0	0	0	0	0	10968.4	1	1	49.5074	45.5
DATA	1427	17	67	0	0	A_42_P622436	NM_022298	5264.42	299.427	8.687382e+004	8.687386e+003	71967.5	51.5	9.082008e+000	0	0	0	0	0	0	71812.1	1	1	57.5363	50.9688
DATA	1428	17	68	0	0	A_44_P304190	NM_001014044	5289.85	299.308	1.847183e+002	2.028016e+001	259	47	8.530431e+000	0	0	0	0	0	0	152.003	1	1	45.4864	48.4444
DATA	1429	17	69	1028	1	(+)E1A_r60_a104	E1A_r60_a104	5315.43	299.883	8.445429e+000	8.406898e+000	96	51	9.099214e+000	0	0	0	0	0	0	0.158175	0	0	43.3362	51.9355
DATA	1430	17	70	0	0	A_42_P771373	NM_012614	5340.37	299.64	1.798642e+004	1.798662e+003	14007.5	53.5	9.678154e+000	0	0	0	1	0	0	14677.3	1	1	48.8603	51.5
DATA	1431	17	71	0	0	A_64_P101976	A_64_P101976	5365.82	299.791	2.663478e+001	8.883710e+000	118	46	9.949384e+000	0	0	0	0	0	0	21.6489	1	0	46.1809	47.9024
DATA	1432	17	72	0	0	A_42_P777935	ENSRNOT00000027369	5391.16	299.966	2.868069e+002	2.991562e+001	331	47	9.780607e+000	0	0	0	0	0	0	232.253	1	1	43.3362	47.2188
DATA	1433	17	73	0	0	A_64_P041521	NM_012945	5416.58	299.427	1.357262e+002	1.603463e+001	218	46	8.816407e+000	0	0	0	0	0	0	109.509	1	1	57.5363	46.0645
DATA	1434	17	74	0	0	A_44_P102661	NM_138862	5442	299.455	2.153543e+003	2.155246e+002	1766	49	9.892414e+000	0	0	0	0	0	0	1731.81	1	1	55.8519	49.1212
DATA	1435	17	75	0	0	A_42_P714166	NM_001017491	5467.68	299.712	8.631629e+000	8.592226e+000	88	47	9.006731e+000	0	0	0	0	0	0	-11.1625	0	0	48.2044	49.3939
DATA	1436	17	76	0	0	A_64_P098703	NM_198728	5493.14	299.563	1.032196e+003	1.035786e+002	925	49	8.434453e+000	0	0	0	0	0	0	825.187	1	1	47.8731	47.84
DATA	1437	17	77	0	0	A_44_P624151	NM_001107932	5518.5	299.5	1.006124e+003	1.009825e+002	869.5	47.5	9.113845e+000	0	0	0	0	0	0	802.306	1	1	49.1849	49.1071
DATA	1438	17	78	0	0	A_42_P674843	NM_001008880	5543.73	299.573	1.936416e+003	1.938351e+002	1611.5	51	1.023789e+001	0	0	0	0	0	0	1540.73	1	1	48.8603	48.7576
DATA	1439	17	79	0	0	A_44_P1039634	NM_001108924	5568.89	299.5	7.376965e+001	1.138706e+001	161	48.5	1.260958e+001	0	0	0	0	0	0	58.5823	1	1	56.9804	49.1579
DATA	1440	17	80	0	0	A_42_P517253	NM_001012275	5594.54	300.057	4.547759e+002	4.629996e+001	454	41	8.836906e+000	0	0	0	1	0	0	360.599	1	1	47.8731	42.8182
DATA	1441	17	81	0	0	A_42_P485589	NM_017246	5620.03	299.653	1.053397e+002	1.366188e+001	184	46	9.704349e+000	0	0	0	0	0	0	83.4111	1	1	49.1849	45.0244
DATA	1442	17	82	66	1	DarkCorner	DarkCorner	5645.11	299.5	8.747827e+000	8.707894e+000	73	45	9.056801e+000	0	0	0	0	0	0	-26.2946	0	0	56.9804	46.641
DATA	1443	17	83	66	1	DarkCorner	DarkCorner	5671.47	299.667	8.752712e+000	8.712757e+000	81	44.5	9.246006e+000	0	0	0	0	0	0	-14.155	0	0	48.2044	45.3947
DATA	1444	17	84	66	1	DarkCorner	DarkCorner	5695.89	299.5	8.754621e+000	8.714657e+000	83	46.5	1.006387e+001	0	0	0	0	0	0	-17.34	0	0	56.9804	44.1923
DATA	1445	17	85	66	1	DarkCorner	DarkCorner	5721.42	299.427	8.753033e+000	8.713076e+000	91.5	45	7.502226e+000	0	0	0	0	0	0	-10.3441	0	0	57.5363	44.9231
DATA	1446	18	1	66	1	DarkCorner	DarkCorner	3601.27	306	7.625591e+000	7.590781e+000	79	43	8.488575e+000	0	0	0	0	0	0	-20.4936	0	0	46.1809	44.5484
DATA	1447	18	2	66	1	DarkCorner	DarkCorner	3626.5	305.984	7.563819e+000	7.529291e+000	86	46	9.678451e+000	0	0	0	0	0	0	-18.1787	0	0	44.4243	46.6207
DATA	1448	18	3	66	1	DarkCorner	DarkCorner	3651.72	306.015	7.505896e+000	7.471632e+000	74.5	46.5	9.526634e+000	0	0	0	0	0	0	-26.5861	0	0	45.835	46
DATA	1449	18	4	0	0	A_42_P608713	TC595074	3677.03	306.246	1.109621e+003	1.112097e+002	1127	48	9.242967e+000	0	0	0	0	0	0	1030.53	1	1	45.4864	48.1081
DATA	1450	18	5	0	0	A_44_P411771	XM_001056376	3702.58	306.288	8.465651e+002	8.497640e+001	885	48	1.138666e+001	0	0	0	0	0	0	791.658	1	1	45.835	47.2143
DATA	1451	18	6	0	0	A_42_P703647	NM_001108688	3727.58	305.573	4.485541e+001	8.585703e+000	145	48	1.163378e+001	0	0	0	0	0	0	42.207	1	1	57.5363	49.8571
DATA	1452	18	7	0	0	A_64_P139212	NM_001030052	3753.44	306.208	3.339802e+004	3.339810e+003	30756.5	47	1.028151e+001	0	0	0	0	0	0	31620.9	1	1	49.1849	49.069
DATA	1453	18	8	0	0	A_64_P082461	FQ211879	3778.5	305.648	1.418057e+002	1.592032e+001	240	48	1.214775e+001	0	0	0	0	0	0	134.986	1	1	57.5363	50.8667
DATA	1454	18	9	0	0	A_64_P144053	NM_001108100	3804.59	306.129	6.232518e+002	6.273947e+001	674	47.5	1.110611e+001	0	0	0	0	0	0	596.451	1	1	47.2035	48.4063
DATA	1455	18	10	0	0	A_42_P455802	NM_001013929	3829.32	306.221	4.490830e+003	4.491401e+002	4234	47	9.221775e+000	0	0	0	0	0	0	4317.54	1	1	46.5243	45.7727
DATA	1456	18	11	0	0	A_44_P575367	ENSRNOT00000068160	3854.58	305.573	7.167749e+000	7.135028e+000	84.5	49.5	9.280915e+000	0	0	0	0	0	0	-15.1819	0	0	65	48.8462
DATA	1457	18	12	0	0	A_64_P008259	ENSRNOT00000040453	3880.5	306	2.402720e+003	2.403771e+002	2475	46	9.486164e+000	0	0	0	0	0	0	2329.12	1	1	48.5334	47.8889
DATA	1458	18	13	0	0	A_44_P433935	NM_001024894	3905.46	306.177	7.114090e+000	7.081615e+000	92	49	1.053698e+001	0	0	0	0	0	0	-9.25002	0	0	49.5074	49.1935
DATA	1459	18	14	0	0	A_64_P027747	TC585156	3930.93	306.2	9.952777e+003	9.953028e+002	9422.5	44	7.999059e+000	0	0	0	0	0	0	9711.89	1	1	46.8651	44.5806
DATA	1460	18	15	0	0	A_44_P247880	ENSRNOT00000032333	3956.41	306.225	7.072288e+000	7.040003e+000	101	49	1.254872e+001	0	0	0	0	0	0	-2.34988	0	0	47.8731	50.4483
DATA	1461	18	16	0	0	A_44_P422321	NM_001105813	3981.64	306.219	2.060434e+003	2.061630e+002	2149	55	1.186699e+001	0	0	0	0	0	0	2020.86	1	1	44.7812	53.4444
DATA	1462	18	17	0	0	A_44_P374824	ENSRNOT00000025777	4007.39	305.931	5.176022e+001	8.713401e+000	154	54.5	1.060384e+001	0	0	0	0	0	0	50.8677	1	1	53.8203	53.2
DATA	1463	18	18	0	0	A_64_P029482	A_64_P029482	4032.5	306	3.413047e+001	7.785937e+000	136	49.5	1.230344e+001	0	0	0	0	0	0	33.5968	1	0	54.1152	51.0667
DATA	1464	18	19	0	0	A_64_P083918	NM_053396	4058	306	8.734536e+000	7.043282e+000	108	48	1.060109e+001	0	0	0	0	0	0	8.60913	1	0	54.9904	49.4375
DATA	1465	18	20	1028	1	(+)E1A_r60_3	E1A_r60_3	4084.03	306.23	2.181804e+001	7.314928e+000	116	47	1.088153e+001	0	0	0	0	0	0	21.5262	1	0	45.1352	48.45
DATA	1466	18	21	0	0	A_42_P508415	CV108834	4108.5	306	2.077313e+002	2.191383e+001	305	48.5	9.166970e+000	0	0	0	0	0	0	205.067	1	1	54.1152	50.6333
DATA	1467	18	22	0	0	A_64_P018331	NM_001107720	4134.6	306.357	2.634726e+003	2.635649e+002	2670.5	46	1.080338e+001	0	0	0	0	0	0	2601.8	1	1	47.2035	48.25
DATA	1468	18	23	0	0	A_64_P142056	NM_001011938	4159.71	306.147	1.128603e+004	1.128624e+003	10884	50	1.182187e+001	0	0	0	0	0	0	11144.3	1	1	45.835	50.56
DATA	1469	18	24	0	0	A_44_P1030098	NM_001105866	4184.91	306.308	2.601961e+002	2.693919e+001	351	51	8.867560e+000	0	0	0	0	0	0	256.843	1	1	45.835	52.6857
DATA	1470	18	25	0	0	A_64_P125958	NM_177933	4210.61	306.115	3.033968e+001	7.613896e+000	134.5	49	8.835525e+000	0	0	0	0	0	0	29.9281	1	0	43.7019	48.931
DATA	1471	18	26	0	0	A_64_P002066	XM_001056138	4235.88	306.031	5.197226e+001	8.710409e+000	150	47	1.218937e+001	0	0	0	0	0	0	51.2181	1	1	45.835	48.7742
DATA	1472	18	27	0	0	A_42_P521242	ENSRNOT00000003841	4261.36	306.13	4.489884e+003	4.490429e+002	4538	49.5	1.007267e+001	0	0	0	0	0	0	4419.27	1	1	46.8651	50.3
DATA	1473	18	28	0	0	A_42_P652827	NM_001024274	4286.5	306.258	3.884753e+003	3.885385e+002	3768.5	47	1.065894e+001	0	0	0	0	0	0	3817.95	1	1	46.5243	48.25
DATA	1474	18	29	0	0	A_42_P533792	NM_001106575	4312	306.203	1.251541e+004	1.251561e+003	12011	47	1.736113e+001	0	0	0	0	0	0	12278	1	1	46.8651	53.1379
DATA	1475	18	30	1028	1	(+)E1A_r60_1	E1A_r60_1	4337.5	306	7.068691e+000	7.036423e+000	83.5	47.5	9.789855e+000	0	0	0	0	0	0	-14.2576	0	0	54.1152	48.7143
DATA	1476	18	31	0	0	A_64_P210103	NM_001100666	4362.5	306	9.930768e+001	1.218018e+001	198	46.5	1.231486e+001	0	0	0	0	0	0	97.0003	1	1	54.1152	46.6818
DATA	1477	18	32	0	0	A_64_P131745	A_64_P131745	4388.09	306.386	5.697357e+001	9.080121e+000	155	48	9.771469e+000	0	0	0	0	0	0	55.5094	1	1	57.259	46.3667
DATA	1478	18	33	0	0	A_64_P017791	XM_002727063	4413.5	306.352	7.122565e+000	7.102294e+000	104	50	9.329713e+000	0	0	0	0	0	0	4.04995	0	0	57.5363	49.1081
DATA	1479	18	34	0	0	A_42_P560288	NM_198788	4439.09	306.104	1.564388e+004	1.564404e+003	14722	53	7.430810e+000	0	0	0	0	0	0	15152.8	1	1	46.8651	52.5714
DATA	1480	18	35	0	0	A_42_P571463	NM_001013221	4464.51	305.868	2.325042e+003	2.326136e+002	2318	56	1.414954e+001	0	0	0	0	0	0	2244.71	1	1	46.8651	57.1304
DATA	1481	18	36	0	0	A_42_P648207	NM_001013882	4489.5	306.352	8.690322e+002	8.719758e+001	923	57.5	1.468763e+001	0	0	0	0	0	0	836.219	1	1	65	57.9706
DATA	1482	18	37	0	0	A_64_P120833	NM_131910	4515.12	306.397	1.346044e+004	1.346063e+003	12346	54.5	1.165523e+001	0	0	0	0	0	0	12904.8	1	1	48.5334	55.6111
DATA	1483	18	38	0	0	A_42_P705337	TC582694	4540.56	306.52	3.259193e+003	3.259991e+002	3091	53.5	1.169045e+001	0	0	0	0	0	0	3112.75	1	1	49.1849	53.5
DATA	1484	18	39	0	0	A_44_P544340	NM_001034939	4565.83	306.6	5.520619e+002	5.567909e+001	613.5	49.5	1.136809e+001	0	0	0	0	0	0	525.164	1	1	47.2035	49.7143
DATA	1486	18	41	0	0	A_44_P310596	NM_001014166	4617	306.271	9.429637e+002	9.457883e+001	969	47.5	1.317489e+001	0	0	0	0	0	0	889.326	1	1	46.8651	49.7222
DATA	1487	18	42	0	0	A_64_P013409	A_64_P013409	4642.25	306.208	7.370379e+000	7.336734e+000	94	49.5	1.212814e+001	0	0	0	0	0	0	-4.48811	0	0	38.6789	50.3824
DATA	1488	18	43	0	0	A_64_P076485	A_64_P076485	4667.74	306.348	1.532379e+003	1.534150e+002	1543	51	1.358989e+001	0	0	0	0	0	0	1432.14	1	1	47.2035	54.0667
DATA	1489	18	44	0	0	A_64_P096121	ENSRNOT00000028891	4692.58	306.427	3.812668e+001	8.328862e+000	135	46	1.326678e+001	0	0	0	0	0	0	35.4679	1	1	65	49.1515
DATA	1490	18	45	0	0	A_42_P521086	NM_001100857	4719.05	306.545	1.051094e+002	1.287908e+001	202	48	1.055675e+001	0	0	0	0	0	0	97.2863	1	1	45.4864	49.4848
DATA	1491	18	46	0	0	A_64_P143133	TC637520	4744.04	306.645	2.606933e+001	7.920271e+000	125	50	9.593146e+000	0	0	0	0	0	0	24.0115	1	0	49.1849	50.8421
DATA	1492	18	47	0	0	A_64_P067163	NM_017248	4769.3	306.433	5.680550e+004	5.680555e+003	50811	54	1.314306e+001	0	0	0	0	0	0	52056.6	1	1	53.2255	53.5
DATA	1493	18	48	0	0	A_64_P118288	NM_053448	4794.42	306.427	4.784292e+002	4.843583e+001	546	49	1.646664e+001	0	0	0	0	0	0	436.202	1	1	57.5363	52.6897
DATA	1494	18	49	0	0	A_64_P112342	A_64_P112342	4819.87	306.115	3.777373e+001	8.482924e+000	135	48	1.660910e+001	0	0	0	0	0	0	34.2581	1	0	44.4243	51.0769
DATA	1495	18	50	0	0	A_64_P074741	NM_001077680	4845.71	306.292	5.575654e+001	9.455229e+000	147	45	7.567247e+000	0	0	0	0	0	0	50.2968	1	1	45.1352	44.3214
DATA	1496	18	51	0	0	A_64_P153062	NM_001107890	4870.68	306.382	2.945494e+002	3.043882e+001	365	49	7.716293e+000	0	0	0	0	0	0	264.317	1	1	46.5243	47.4
DATA	1497	18	52	0	0	A_64_P051942	A_64_P051942	4896	306.455	3.149770e+002	3.242944e+001	389	55	1.671457e+001	0	0	0	0	0	0	281.137	1	1	55.8519	57.6765
DATA	1498	18	53	0	0	A_44_P233080	ENSRNOT00000026303	4921.8	306.761	1.127347e+004	1.127374e+003	10202	50	9.744811e+000	0	0	0	0	0	0	10007.5	1	1	46.8651	49.2571
DATA	1499	18	54	0	0	A_64_P127747	A_64_P127747	4947	307.226	1.239872e+002	1.464887e+001	209.5	49.5	1.127569e+001	0	0	0	0	0	0	109.48	1	1	45.4864	48.9286
DATA	1500	18	55	0	0	A_42_P773155	NM_001106996	4972.7	306.9	3.752406e+004	3.752415e+003	32640	47	8.322203e+000	0	0	0	0	0	0	32950	1	1	47.2035	46.2917
DATA	1501	18	56	0	0	A_64_P003624	NM_175591	4997.5	306.5	2.122897e+001	8.167792e+000	125	50	9.094431e+000	0	0	0	0	0	0	18.5413	1	0	57.5363	50.5313
DATA	1502	18	57	0	0	A_64_P148728	NM_030989	5023.11	306.703	3.721032e+002	3.804594e+001	434	48	1.068463e+001	0	0	0	0	0	0	323.234	1	1	45.1352	47.8065
DATA	1503	18	58	0	0	A_44_P436284	ENSRNOT00000031389	5048.61	306.408	3.696916e+002	3.781923e+001	415	52	1.156847e+001	0	0	0	0	0	0	319.391	1	1	47.8731	49.7273
DATA	1504	18	59	0	0	A_42_P626851	NM_001107917	5073.94	306.536	1.546467e+003	1.548543e+002	1398	46	8.997474e+000	0	0	0	0	0	0	1328.97	1	1	47.5395	46.2727
DATA	1505	18	60	0	0	A_42_P797303	TC587453	5099.3	306.507	2.124339e+004	2.124355e+003	18033	47	1.162727e+001	0	0	0	1	0	0	18159.4	1	1	46.8651	47.12
DATA	1506	18	61	0	0	A_64_P096312	A_64_P096312	5124.3	307.132	5.476933e+003	5.477532e+002	5137	50	1.272465e+001	0	0	0	0	0	0	4658.3	1	1	40.6843	53.4
DATA	1507	18	62	0	0	A_64_P150894	A_64_P150894	5150.44	306.521	5.132007e+002	5.196209e+001	541	43	7.604328e+000	0	0	0	0	0	0	434.141	1	1	48.2044	43.6774
DATA	1508	18	63	0	0	A_64_P241372	NM_001000593	5175.42	306.573	8.221077e+000	8.198806e+000	104.5	45	1.114940e+001	0	0	0	0	0	0	4.20837	0	0	57.5363	47.1795
DATA	1509	18	64	0	0	A_44_P433621	NM_001025016	5200.87	307.143	6.507955e+002	6.559705e+001	633	45	1.088561e+001	0	0	0	0	0	0	545.156	1	1	45.4864	46.5588
DATA	1510	18	65	0	0	A_64_P163511	NM_013190	5226.11	306.5	1.660235e+003	1.662290e+002	1469.5	48	1.130783e+001	0	0	0	0	0	0	1383.91	1	1	56.9804	45.3947
DATA	1511	18	66	0	0	A_44_P129412	AF155959	5251.59	306.6	2.878486e+003	2.879683e+002	2477.5	48.5	1.022619e+001	0	0	0	0	0	0	2388.15	1	1	49.5074	46.9706
DATA	1512	18	67	0	0	A_64_P143037	NM_001025134	5276.89	306.5	4.946693e+002	5.016521e+001	517.5	49	8.552781e+000	0	0	0	0	0	0	408.535	1	1	65	48.6579
DATA	1513	18	68	0	0	A_64_P032693	XM_002724830	5302.42	306.573	1.246713e+001	8.470095e+000	109.5	50	1.087742e+001	0	0	0	0	0	0	10.2509	1	0	57.5363	51.5455
DATA	1514	18	69	0	0	A_42_P727368	NM_001025693	5328.1	306.739	7.311863e+001	1.114679e+001	160.5	48	1.093510e+001	0	0	0	1	0	0	59.8658	1	1	46.5243	51.8276
DATA	1515	18	70	0	0	A_64_P075765	A_64_P075765	5353.11	306.5	2.073376e+001	8.698273e+000	116	52.5	9.903141e+000	0	0	0	0	0	0	16.9074	1	0	56.9804	51.5588
DATA	1516	18	71	0	0	A_42_P639174	NM_001106592	5378.89	306.88	1.994885e+003	1.996687e+002	1733	48.5	1.100239e+001	0	0	0	0	0	0	1620.5	1	1	47.8731	47.9118
DATA	1517	18	72	0	0	A_64_P063135	NM_001109623	5404.42	307.203	8.006693e+001	1.168494e+001	164	43	1.039941e+001	0	0	0	0	0	0	64.8069	1	1	47.2035	45.9091
DATA	1518	18	73	0	0	A_64_P018236	NM_001108882	5429.42	306.573	8.579516e+000	8.540351e+000	99	48	7.604857e+000	0	0	0	0	0	0	-0.0198336	0	0	57.5363	47.0769
DATA	1519	18	74	0	0	A_43_P14648	NM_001012034	5454.77	306.797	1.292917e+003	1.295752e+002	1098.5	47.5	7.048115e+000	0	0	0	0	0	0	1039.59	1	1	46.1809	47.75
DATA	1520	18	75	0	0	A_42_P698520	NM_001108216	5480.25	306.644	1.027808e+004	1.027844e+003	8164.5	48	7.570685e+000	0	0	0	0	0	0	8239.78	1	1	48.5334	47.6207
DATA	1521	18	76	0	0	A_43_P19450	NM_001105713	5505.58	306.725	2.023667e+002	2.199425e+001	265	47	1.191917e+001	0	0	0	0	0	0	161.806	1	1	46.8651	49
DATA	1522	18	77	0	0	A_64_P013012	XM_225619	5531.38	307.183	5.242825e+002	5.313466e+001	512.5	48	7.030054e+000	0	0	0	0	0	0	418.227	1	1	47.5395	48.963
DATA	1523	18	78	0	0	A_42_P499684	NM_001108642	5556.61	307.129	6.103996e+002	6.165029e+001	573.5	56	1.288303e+001	0	0	0	1	0	0	485.912	1	1	47.2035	53.6
DATA	1524	18	79	0	0	A_64_P297479	ENSRNOT00000044350	5582	307.226	3.446438e+004	3.446449e+003	27311	47	1.306991e+001	0	0	0	0	0	0	27387.5	1	1	45.4864	48.4138
DATA	1525	18	80	0	0	A_64_P103238	NM_001014158	5607.29	307.116	8.098274e+002	8.144673e+001	730	42	9.979783e+000	0	0	0	0	0	0	642.595	1	1	46.1809	43.1034
DATA	1526	18	81	0	0	A_42_P751562	NM_001037355	5632.74	306.778	1.005448e+004	1.005485e+003	7619	44	5.229118e+000	0	0	0	1	0	0	7968.77	1	1	47.5395	43.0333
DATA	1527	18	82	66	1	DarkCorner	DarkCorner	5657.58	306.573	8.738260e+000	8.698370e+000	80	46	9.211037e+000	0	0	0	0	0	0	-17.7315	0	0	65	46.7143
DATA	1528	18	83	66	1	DarkCorner	DarkCorner	5683.65	306.949	8.741096e+000	8.701194e+000	75.5	46	9.462045e+000	0	0	0	0	0	0	-21.9935	0	0	49.8279	44.303
DATA	1529	18	84	66	1	DarkCorner	DarkCorner	5709.53	306.845	8.741251e+000	8.701348e+000	76	46	9.595019e+000	0	0	0	0	0	0	-20.9484	0	0	42.9674	46.7576
DATA	1530	18	85	66	1	DarkCorner	DarkCorner	5734.74	306.826	8.737765e+000	8.697878e+000	79	41	8.441392e+000	0	0	0	0	0	0	-16.9931	0	0	46.1809	41.0741
DATA	1531	19	1	66	1	DarkCorner	DarkCorner	3588.82	313	7.647870e+000	7.612958e+000	86	43	8.831715e+000	0	0	0	0	0	0	-13.3877	0	0	45.4864	44.0284
DATA	1532	19	2	66	1	DarkCorner	DarkCorner	3614.4	313.596	7.582866e+000	7.548250e+000	78	44	1.033979e+001	0	0	0	0	0	0	-20.0939	0	0	40.6843	46.7083
DATA	1533	19	3	66	1	DarkCorner	DarkCorner	3639.38	313.604	7.524098e+000	7.489751e+000	80	45	1.243466e+001	0	0	0	0	0	0	-20.5081	0	0	39.8942	47
DATA	1534	19	4	66	1	DarkCorner	DarkCorner	3664.71	313.2	7.468765e+000	7.434671e+000	80	49	7.567289e+000	0	0	0	0	0	0	-21.4865	0	0	41.4593	48.0286
DATA	1535	19	5	0	0	A_44_P198705	NM_012578	3690.27	313.343	1.692899e+004	1.692915e+003	15675	52.5	9.207071e+000	0	0	0	0	0	0	15797.1	1	1	46.8651	51.5625
DATA	1536	19	6	0	0	A_42_P604252	NM_001108797	3715.38	313.384	1.046459e+003	1.049026e+002	1078.5	43.5	1.200490e+001	0	0	0	0	0	0	982.876	1	1	47.8731	45.9412
DATA	1537	19	7	0	0	A_43_P20016	NM_001107377	3741.03	313.373	9.089366e+001	1.165089e+001	185.5	47	1.165959e+001	0	0	0	0	0	0	85.9026	1	1	45.4864	49.55
DATA	1538	19	8	0	0	A_42_P491486	NM_022533	3765.93	313.464	7.425204e+003	7.425558e+002	7019	49	1.068380e+001	0	0	0	0	0	0	7057.07	1	1	46.8651	50.8333
DATA	1539	19	9	0	0	A_64_P345929	NM_001191639	3791.42	313.427	7.242505e+000	7.211428e+000	105	46	1.018770e+001	0	0	0	0	0	0	1.61633	0	0	57.5363	45.7813
DATA	1540	19	10	0	0	A_64_P152047	NM_001000521	3816.95	313.322	7.207091e+000	7.174191e+000	102	46	1.031799e+001	0	0	0	0	0	0	0.00225451	0	0	43.7019	45.4333
DATA	1541	19	11	0	0	A_42_P724510	NM_001007625	3842.44	313.466	2.034103e+004	2.034116e+003	19023.5	52.5	1.261117e+001	0	0	0	1	0	0	19619.6	1	1	49.1849	52.7917
DATA	1542	19	12	0	0	A_42_P552906	NM_001007701	3867.63	313.5	3.048365e+003	3.049195e+002	2960.5	49	9.290038e+000	0	0	0	0	0	0	2952.18	1	1	47.8731	47.973
DATA	1543	19	13	0	0	A_64_P121673	A_64_P121673	3892.58	313.427	9.436088e+000	7.149883e+000	115	47	1.047188e+001	0	0	0	0	0	0	9.17144	1	0	57.5363	49.2188
DATA	1544	19	14	0	0	A_64_P047470	NM_001008875	3918.44	313.743	2.668812e+001	7.550678e+000	129	42	8.121309e+000	0	0	0	0	0	0	26.0279	1	0	46.8651	43.7931
DATA	1545	19	15	0	0	A_43_P14911	NM_031512	3943.58	313.427	9.299816e+001	1.166592e+001	193	46	1.174505e+001	0	0	0	0	0	0	90.9561	1	1	57.5363	48.7097
DATA	1546	19	16	0	0	A_44_P117234	NM_001191788	3969	313.455	1.184525e+001	7.124467e+000	114	52	1.333305e+001	0	0	0	0	0	0	11.6147	1	0	55.8519	52.3125
DATA	1547	19	17	0	0	A_64_P066782	ENSRNOT00000046676	3994.94	313.462	5.313935e+002	5.359970e+001	623.5	56.5	1.016616e+001	0	0	0	0	0	0	522.207	1	1	44.7812	54.9375
DATA	1548	19	18	0	0	A_64_P125013	NM_019167	4019.58	313.427	6.260915e+004	6.260919e+003	61636	52	1.278070e+001	0	0	0	0	0	0	61634.6	1	1	57.5363	52.2903
DATA	1549	19	19	0	0	A_64_P143121	NM_001099510	4045.71	313.939	7.018637e+000	6.995618e+000	102	55	1.272367e+001	0	0	0	0	0	0	3.50164	0	0	39.4933	56.2593
DATA	1550	19	20	0	0	A_64_P065600	NM_022954	4070.58	313.427	7.011437e+000	6.979430e+000	87	47.5	1.193169e+001	0	0	0	0	0	0	-10.9914	0	0	57.5363	50.0238
DATA	1551	19	21	0	0	A_44_P300818	AF030087	4096.03	313.939	1.360230e+003	1.362016e+002	1439	49	1.079566e+001	0	0	0	0	0	0	1343.64	1	1	46.8651	52.7097
DATA	1552	19	22	0	0	A_64_P103130	A_64_P103130	4121.7	313.742	2.979861e+003	2.980676e+002	3127	49.5	1.123676e+001	0	0	0	0	0	0	2944.76	1	1	45.4864	51.0882
DATA	1553	19	23	0	0	A_64_P064938	NM_001109332	4146.58	313.427	7.002095e+000	6.993250e+000	106	45.5	8.738712e+000	0	0	0	0	0	0	5.61528	0	0	65	45.9286
DATA	1554	19	24	0	0	A_64_P087276	NM_138527	4172.42	313.427	7.003503e+000	6.971533e+000	92	51.5	1.042170e+001	0	0	0	0	0	0	-7.66446	0	0	57.5363	50.9688
DATA	1555	19	25	0	0	A_64_P032728	NM_001037778	4197.54	313.618	2.345080e+004	2.345091e+003	23254.5	49	7.297309e+000	0	0	0	0	0	0	23160.6	1	1	47.2035	48.4074
DATA	1556	19	26	0	0	A_44_P956203	NM_001134992	4223	313.455	7.012644e+000	7.005064e+000	104	47.5	1.373271e+001	0	0	0	0	0	0	5.7684	0	0	55.8519	49.0714
DATA	1557	19	27	0	0	A_64_P106488	A_64_P106488	4248.42	313.427	3.909512e+001	8.007551e+000	137	49	1.136302e+001	0	0	0	0	0	0	38.5371	1	1	57.5363	51.4194
DATA	1558	19	28	0	0	A_43_P10011	NM_001025274	4273.8	313.733	1.176814e+003	1.178893e+002	1269	50	7.867731e+000	0	0	0	0	0	0	1158.46	1	1	44.0646	49.087
DATA	1559	19	29	0	0	A_44_P321009	NM_012540	4299.33	313.5	1.301369e+001	7.129330e+000	112	50	1.080703e+001	0	0	0	0	0	0	12.7891	1	0	57.5363	50.0333
DATA	1560	19	30	0	0	A_44_P133453	XM_236776	4324.64	313.944	3.124689e+003	3.125478e+002	3154	47.5	1.112256e+001	0	0	0	0	0	0	3065.04	1	1	48.5334	49.5294
DATA	1561	19	31	0	0	A_64_P027323	NM_001000088	4350.48	314.072	7.051916e+001	9.963157e+000	171	51	1.139062e+001	0	0	0	0	0	0	69.0208	1	1	47.8731	50.2903
DATA	1562	19	32	0	0	A_44_P374568	NM_001107778	4375.42	314.099	5.524396e+002	5.569261e+001	619	44	1.011632e+001	0	0	0	0	0	0	539.416	1	1	47.8731	44.6087
DATA	1563	19	33	0	0	A_64_P040176	NM_001108498	4400.75	313.627	3.863264e+003	3.863912e+002	3707	44.5	1.040093e+001	0	0	0	0	0	0	3761.98	1	1	46.1809	45.4
DATA	1564	19	34	0	0	A_64_P347204	ENSRNOT00000002350	4426.63	313.75	1.399345e+002	1.568928e+001	240	49.5	9.994481e+000	0	0	0	0	0	0	135.866	1	1	46.5243	48.8
DATA	1565	19	35	0	0	A_64_P142544	A_64_P142544	4451.5	313.5	7.149370e+000	7.121027e+000	100	54	1.227577e+001	0	0	0	0	0	0	2.39324	0	0	65	54.8621
DATA	1566	19	36	0	0	A_64_P047367	NM_017050	4476.89	313.5	8.722894e+004	8.722897e+003	83775.5	50	1.551991e+001	0	0	0	0	0	0	84152	1	1	56.9804	53.8571
DATA	1567	19	37	0	0	A_64_P130858	NM_001003705	4502.91	314.129	9.387088e+001	1.180957e+001	190	56	1.222027e+001	0	0	0	0	0	0	90.2394	1	1	46.8651	55.5526
DATA	1568	19	38	0	0	A_42_P647009	NM_053814	4527.87	313.955	2.922633e+003	2.923517e+002	2803	55	1.081199e+001	0	0	0	0	0	0	2799.25	1	1	46.8651	54.4286
DATA	1569	19	39	0	0	A_42_P618538	NM_001030031	4553.06	314.175	2.105290e+003	2.106527e+002	2088	50	1.154350e+001	0	0	0	0	0	0	2008.67	1	1	45.4864	51.4359
DATA	1570	19	40	0	0	A_64_P048225	NM_001108643	4578.97	313.857	3.405153e+001	8.010122e+000	130.5	49	1.120164e+001	0	0	0	0	0	0	32.3526	1	0	45.4864	51.0882
DATA	1571	19	41	0	0	A_64_P044826	A_64_P044826	4604.13	313.757	1.379583e+002	1.559926e+001	231	46	1.199280e+001	0	0	0	0	0	0	130.524	1	1	46.5243	47.4103
DATA	1572	19	42	0	0	A_64_P046273	NM_001168559	4629.3	313.873	2.740195e+002	2.836091e+001	364	49.5	1.455463e+001	0	0	0	0	0	0	258.129	1	1	45.1352	52.8611
DATA	1573	19	43	0	0	A_43_P16232	NM_024395	4654.92	314.077	2.049280e+003	2.050596e+002	1927	50	1.165506e+001	0	0	0	0	0	0	1921.68	1	1	46.1809	50.5714
DATA	1574	19	44	0	0	A_44_P147356	XM_225859	4680.61	313.638	1.201850e+004	1.201873e+003	11352	50.5	1.174876e+001	0	0	0	0	0	0	11216.4	1	1	47.5395	50.3667
DATA	1575	19	45	0	0	A_44_P979417	ENSRNOT00000068382	4705.73	314.317	3.941280e+001	8.397930e+000	137	50	1.049558e+001	0	0	0	0	0	0	36.6116	1	1	44.7812	49.8125
DATA	1576	19	46	0	0	A_44_P283784	NM_001107682	4731.37	314.265	5.902472e+002	5.949334e+001	640	51	9.249121e+000	0	0	0	0	0	0	545.583	1	1	46.5243	50.2903
DATA	1577	19	47	0	0	A_44_P112061	ENSRNOT00000046359	4756.49	314.056	5.637075e+002	5.686614e+001	608.5	49.5	9.829313e+000	0	0	0	0	0	0	518.462	1	1	47.8731	50.1538
DATA	1578	19	48	0	0	A_42_P541025	NM_212546	4781.58	313.573	2.888799e+002	2.985277e+001	365.5	46.5	1.038810e+001	0	0	0	0	0	0	264.34	1	1	57.5363	49.4667
DATA	1579	19	49	0	0	A_44_P156521	NM_001025135	4807.3	313.9	1.011577e+003	1.014403e+002	1035.5	49	1.467900e+001	0	0	0	0	0	0	920.849	1	1	47.2035	49.8889
DATA	1580	19	50	0	0	A_42_P562202	NM_001107959	4832.5	313.5	5.704277e+001	9.508342e+000	155.5	43.5	1.056383e+001	0	0	0	0	0	0	51.654	1	1	57.5363	45.2647
DATA	1581	19	51	0	0	A_42_P522899	NM_021578	4857.68	314.076	7.048147e+001	1.039943e+001	164	46.5	8.810195e+000	0	0	0	0	0	0	63.4937	1	1	45.835	46.9667
DATA	1582	19	52	0	0	A_42_P581060	NM_001108722	4883.31	314.029	1.432518e+004	1.432539e+003	12484	48	1.080752e+001	0	0	0	0	0	0	12835.4	1	1	46.1809	48.8125
DATA	1583	19	53	0	1	ERCC-00043_129	ERCC-00043_129	4908.43	313.457	7.765332e+000	7.729883e+000	98	50.5	1.159108e+001	0	0	0	0	0	0	-4.50459	0	0	39.4933	51.825
DATA	1584	19	54	0	0	A_64_P098577	A_64_P098577	4934	313.545	7.807634e+000	7.771992e+000	97	51	9.570438e+000	0	0	0	0	0	0	-2.9396	0	0	55.8519	50.2286
DATA	1585	19	55	0	0	A_64_P043164	ENSRNOT00000009696	4959.83	314.323	4.163837e+002	4.236523e+001	462.5	46.5	1.071760e+001	0	0	0	0	0	0	367.07	1	1	45.4864	46.8125
DATA	1586	19	56	0	0	A_42_P576446	NM_001107673	4984.58	313.573	7.276263e+003	7.276687e+002	6231	49	9.273228e+000	0	0	0	0	0	0	6379.93	1	1	57.5363	49.5833
DATA	1587	19	57	0	0	A_42_P801593	NM_001134744	5010.38	314	3.007219e+003	3.008256e+002	2654	48.5	8.879785e+000	0	0	0	0	0	0	2622.5	1	1	48.5334	48.6667
DATA	1588	19	58	0	0	A_42_P535743	NM_199393	5035.86	314.03	5.354373e+003	5.354962e+002	4629.5	44	9.507803e+000	0	0	0	0	0	0	4644.23	1	1	46.5243	46.1143
DATA	1589	19	59	0	0	A_64_P051890	ENSRNOT00000056631	5061	313.545	1.297324e+001	8.089428e+000	113	43.5	9.239388e+000	0	0	0	0	0	0	11.1923	1	0	55.8519	44.6579
DATA	1590	19	60	0	0	A_64_P098379	NM_001013890	5086.58	314.092	4.971470e+001	9.441635e+000	138	45	9.986230e+000	0	0	0	0	0	0	42.6651	1	1	45.1352	46.7813
DATA	1591	19	61	0	0	A_64_P144513	XR_086096	5111.58	313.573	7.146020e+004	7.146024e+003	60523.5	51.5	1.128561e+001	0	0	0	0	0	0	61005.9	1	1	57.5363	51.5714
DATA	1592	19	62	0	0	A_44_P325337	NM_001030041	5137.42	313.573	7.484516e+001	1.103704e+001	167	44	1.021746e+001	0	0	0	0	0	0	63.5602	1	1	57.5363	46.2162
DATA	1593	19	63	0	0	A_44_P142029	NM_001002851	5162.83	314.323	9.273090e+003	9.273448e+002	7686	45	1.085439e+001	0	0	0	0	0	0	7835.97	1	1	45.4864	47.1538
DATA	1594	19	64	0	0	A_44_P292568	NM_001000207	5188.38	314.377	9.997212e+001	1.292545e+001	182	41	8.692702e+000	0	0	0	0	0	0	84.0566	1	1	47.2035	42.2162
DATA	1595	19	65	0	0	A_42_P624092	XR_007263	5213.57	314.29	1.235624e+004	1.235651e+003	9892	46	1.204619e+001	0	0	0	0	0	0	10338.8	1	1	46.8651	45.7391
DATA	1596	19	66	0	0	A_42_P597322	NM_001103357	5239.25	314.188	7.532781e+002	7.578070e+001	720	48	1.151309e+001	0	0	0	1	0	0	627.254	1	1	46.1809	45.4857
DATA	1597	19	67	0	0	A_64_P034409	NM_001108146	5264.77	314.359	1.860277e+003	1.862132e+002	1639	46	1.149854e+001	0	0	0	0	0	0	1541.93	1	1	44.7812	46.7037
DATA	1598	19	68	0	0	A_64_P112797	NM_001001121	5289.91	314.104	2.483421e+002	2.619977e+001	305	49	9.207168e+000	0	0	0	0	0	0	204.925	1	1	46.8651	49.3171
DATA	1599	19	69	0	0	A_42_P761023	NM_001144870	5315.07	314.214	3.281741e+002	3.387133e+001	369	48	1.123871e+001	0	0	0	0	0	0	269.652	1	1	46.8651	50.0606
DATA	1600	19	70	0	0	A_42_P465408	NM_031647	5340.46	314.081	1.237398e+003	1.240258e+002	1086	53.5	1.291261e+001	0	0	0	1	0	0	1012.52	1	1	48.5334	53.9286
DATA	1601	19	71	0	0	A_64_P115761	NM_001109379	5365.71	314.25	1.980995e+001	8.680399e+000	118	53	1.120234e+001	0	0	0	0	0	0	16.1468	1	0	41.4593	51.7027
DATA	1602	19	72	0	0	A_64_P086487	A_64_P086487	5391.37	314.559	8.521723e+000	8.509842e+000	106	43	1.081596e+001	0	0	0	0	0	0	5.50254	0	0	45.835	46.5806
DATA	1603	19	73	0	0	A_42_P774028	NM_001017447	5416.76	314	3.822235e+003	3.823183e+002	3036	48	6.729930e+000	0	0	0	0	0	0	3092.64	1	1	46.8651	46.8667
DATA	1604	19	74	0	0	A_44_P233080	ENSRNOT00000026303	5442.63	314	1.124580e+004	1.124612e+003	9088	48	7.272551e+000	0	0	0	0	0	0	9068.71	1	1	50.4627	49.16
DATA	1605	19	75	0	0	A_64_P078002	ENSRNOT00000056206	5467.5	314	8.607095e+000	8.599323e+000	106	45	6.736468e+000	0	0	0	0	0	0	5.91415	0	0	54.1152	46.5
DATA	1606	19	76	0	0	A_64_P047888	A_64_P047888	5492.5	314	8.630792e+000	8.597882e+000	102	49.5	1.031858e+001	0	0	0	0	0	0	2.67768	0	0	54.1152	50.6111
DATA	1607	19	77	0	0	A_44_P236001	NM_001000623	5518.76	314.216	7.741284e+001	1.158095e+001	162	46	8.291562e+000	0	0	0	0	0	0	61.9108	1	1	48.2044	46.8
DATA	1608	19	78	0	0	A_42_P819040	TC636720	5543.5	314	8.672106e+000	8.660917e+000	104	53	1.015902e+001	0	0	0	0	0	0	5.59213	0	0	54.1152	51.0333
DATA	1609	19	79	0	0	A_44_P168184	NM_001166675	5569.37	314.205	2.314483e+003	2.316098e+002	1936	47	1.097725e+001	0	0	0	0	0	0	1843.36	1	1	49.5074	46.8
DATA	1610	19	80	0	0	A_64_P094925	NM_001024748	5594.46	314.075	4.363454e+002	4.448622e+001	443	43.5	1.086896e+001	0	0	0	0	0	0	346.963	1	1	45.835	46.35
DATA	1611	19	81	0	0	A_44_P332483	NM_173338	5619.61	314.286	8.713590e+000	8.673813e+000	94	44.5	6.612078e+000	0	0	0	0	0	0	-6.46939	0	0	41.8414	42.3571
DATA	1612	19	82	0	0	A_42_P530071	NM_001107153	5645.7	314.173	1.117172e+004	1.117206e+003	8504	44.5	6.538965e+000	0	0	0	1	0	0	8863.62	1	1	49.8279	44.625
DATA	1613	19	83	66	1	DarkCorner	DarkCorner	5671.02	314.455	8.726647e+000	8.686811e+000	84	45.5	8.069302e+000	0	0	0	0	0	0	-16.4555	0	0	37.4241	45.3409
DATA	1614	19	84	66	1	DarkCorner	DarkCorner	5696.39	314.408	8.728440e+000	8.688595e+000	80	47	1.173967e+001	0	0	0	0	0	0	-18.5801	0	0	40.6843	45.025
DATA	1615	19	85	66	1	DarkCorner	DarkCorner	5721.89	314.212	8.727072e+000	8.687234e+000	85	45.5	9.773671e+000	0	0	0	0	0	0	-13.0223	0	0	45.835	46.1739
DATA	1616	20	1	66	1	DarkCorner	DarkCorner	3601.07	320.535	7.606443e+000	7.571720e+000	83	43	8.697191e+000	0	0	0	0	0	0	-21.387	0	0	47.8731	43.8125
DATA	1617	20	2	66	1	DarkCorner	DarkCorner	3626.33	320.5	7.545401e+000	7.510956e+000	76	46.5	1.043498e+001	0	0	0	0	0	0	-23.7527	0	0	57.5363	48
DATA	1618	20	3	66	1	DarkCorner	DarkCorner	3652.13	320.852	7.486533e+000	7.452358e+000	80	49	1.001000e+001	0	0	0	0	0	0	-23.2276	0	0	44.7812	49
DATA	1619	20	4	0	0	A_42_P787775	NM_001127566	3677	320.455	1.010976e+003	1.013681e+002	1037.5	50	7.669301e+000	0	0	0	0	0	0	941.052	1	1	55.8519	50.4545
DATA	1620	20	5	0	0	A_42_P607770	NM_001134616	3702.5	321.257	1.240362e+004	1.240383e+003	11188.5	43	9.972426e+000	0	0	0	0	0	0	11625.9	1	1	47.2035	45.6667
DATA	1621	20	6	0	0	A_42_P484738	NM_022266	3728.23	321.273	1.013116e+003	1.015744e+002	1066.5	46	1.273235e+001	0	0	0	0	0	0	955.709	1	1	45.4864	48.2
DATA	1622	20	7	0	0	A_64_P075273	NM_031743	3753.33	320.5	2.565641e+002	2.666400e+001	341	51	1.005790e+001	0	0	0	0	0	0	243.415	1	1	57.5363	51.75
DATA	1623	20	8	0	0	A_42_P674050	NM_001107225	3778.99	320.932	8.496321e+003	8.496627e+002	7949	48	1.396722e+001	0	0	0	0	0	0	8106.16	1	1	46.8651	50.75
DATA	1624	20	9	1028	1	(+)E1A_r60_a107	E1A_r60_a107	3803.89	320.5	7.217694e+000	7.184746e+000	102	48	1.107916e+001	0	0	0	0	0	0	-1.13495	0	0	56.9804	45.5946
DATA	1625	20	10	0	0	A_64_P144253	NM_201350	3829.5	320.5	1.983824e+001	7.421119e+000	117.5	46	1.002644e+001	0	0	0	0	0	0	19.1101	1	0	57.5363	45.3793
DATA	1626	20	11	0	0	A_44_P791729	NM_181377	3854.67	320.5	9.357891e+003	9.358162e+002	9844	52	1.113657e+001	0	0	0	0	0	0	9052.54	1	1	57.5363	51.0938
DATA	1627	20	12	0	0	A_42_P550624	NM_001109319	3880.23	321.273	2.743685e+003	2.744602e+002	2717	48	9.069283e+000	0	0	0	0	0	0	2664.76	1	1	45.4864	47.7576
DATA	1628	20	13	0	0	A_43_P11580	NM_012833	3905.5	320.5	1.281828e+002	1.463819e+001	228	43	7.390104e+000	0	0	0	0	0	0	124.914	1	1	57.5363	44.3636
DATA	1629	20	14	0	0	A_44_P417055	XM_223442	3931.12	320.939	8.055213e+002	8.085975e+001	883	46	1.047193e+001	0	0	0	0	0	0	787.472	1	1	50.7771	44.875
DATA	1630	20	15	0	0	A_64_P142867	A_64_P142867	3956.61	321.062	1.336458e+004	1.336476e+003	13223.5	50.5	1.229714e+001	0	0	0	0	0	0	13100.8	1	1	50.1463	50.5667
DATA	1631	20	16	0	0	A_64_P013002	XM_001072551	3981.58	320.573	7.043653e+000	7.011859e+000	103	54	1.017768e+001	0	0	0	0	0	0	0.697858	0	0	57.5363	53.9091
DATA	1632	20	17	0	0	A_42_P457692	NM_001008363	4007.13	321.143	6.236540e+003	6.236932e+002	6246	50	1.135912e+001	0	0	0	0	0	0	6139.82	1	1	45.4864	50.6207
DATA	1633	20	18	0	0	A_42_P788480	NM_019194	4032.63	320.712	8.772749e+003	8.773027e+002	8630.5	54.5	1.298669e+001	0	0	0	0	0	0	8650.33	1	1	48.5334	53.9667
DATA	1634	20	19	0	0	A_42_P518462	NM_001007020	4058.37	321.062	1.054602e+004	1.054626e+003	10227.5	49.5	1.137632e+001	0	0	0	0	0	0	10412.7	1	1	45.1352	51.6
DATA	1635	20	20	0	0	A_64_P007578	NM_001000851	4083.76	320.887	7.894499e+000	7.015030e+000	107	46	1.131901e+001	0	0	0	0	0	0	7.80174	1	0	47.2035	48.4063
DATA	1636	20	21	0	0	A_64_P139350	NM_001191727	4108.42	321.075	3.627055e+001	7.853949e+000	134.5	49.5	9.631504e+000	0	0	0	0	0	0	35.866	1	1	46.1809	52.1071
DATA	1637	20	22	0	0	A_64_P100442	ENSRNOT00000067861	4134.11	320.5	1.347375e+002	1.516740e+001	236	47	9.521308e+000	0	0	0	0	0	0	133.263	1	1	56.9804	47.303
DATA	1638	20	23	1028	1	(+)E1A_r60_a135	E1A_r60_a135	4159.5	320.5	6.997035e+000	6.965094e+000	89	47.5	9.565937e+000	0	0	0	0	0	0	-8.31361	0	0	57.5363	46.9167
DATA	1639	20	24	0	0	A_44_P459760	NM_001108187	4184.89	320.5	2.520338e+001	7.409391e+000	125.5	48.5	1.031142e+001	0	0	0	0	0	0	24.9176	1	0	65	47.9118
DATA	1640	20	25	0	0	A_64_P115536	NM_212545	4210.42	320.573	7.004092e+000	6.972171e+000	101	48	1.157218e+001	0	0	0	0	0	0	0.267042	0	0	65	47.7143
DATA	1641	20	26	0	0	A_44_P538406	NM_013102	4235.79	321	1.903149e+004	1.903162e+003	18204	51	1.296250e+001	0	0	0	0	0	0	18786.4	1	1	46.8651	50.7857
DATA	1642	20	27	0	0	A_64_P120871	NM_198743	4261.49	321.129	1.240852e+003	1.242818e+002	1261	48	8.660165e+000	0	0	0	0	0	0	1223.36	1	1	47.8731	49.0385
DATA	1643	20	28	0	0	A_44_P173048	NM_001009255	4286.44	321.177	1.864408e+003	1.865720e+002	1908.5	49.5	1.053756e+001	0	0	0	0	0	0	1835.39	1	1	43.7019	48.1667
DATA	1644	20	29	0	0	A_64_P058060	NM_001037541	4311.58	320.573	7.042443e+000	7.041450e+000	108	46	1.081672e+001	0	0	0	0	0	0	6.50161	0	0	57.5363	49.1579
DATA	1645	20	30	0	0	A_64_P145982	NM_001109366	4337.3	321.344	2.568610e+001	7.479117e+000	124.5	46	1.124995e+001	0	0	0	0	0	0	25.1901	1	0	44.7812	48.8065
DATA	1646	20	31	0	0	A_42_P514244	NM_012791	4362.58	320.573	2.192619e+002	2.302894e+001	317.5	46	1.133182e+001	0	0	0	0	0	0	214.519	1	1	57.5363	48.7778
DATA	1648	20	33	0	0	A_64_P159155	XM_001071429	4413.49	320.961	1.997682e+001	7.354648e+000	118	48.5	1.008987e+001	0	0	0	0	0	0	19.4418	1	0	40.6843	48.4688
DATA	1649	20	34	0	0	A_64_P030272	ENSRNOT00000041731	4439.13	321.066	1.403678e+002	1.573004e+001	238	52.5	9.538586e+000	0	0	0	0	0	0	136.197	1	1	45.1352	52.2308
DATA	1650	20	35	0	0	A_42_P733076	NM_001033867	4464.42	320.573	2.868327e+002	2.955441e+001	378	49	1.181795e+001	0	0	0	0	0	0	277.405	1	1	57.5363	51.4286
DATA	1651	20	36	0	0	A_44_P349475	NM_031333	4489.5	320.648	1.232438e+003	1.234509e+002	1283.5	51	1.443743e+001	0	0	0	0	0	0	1187.92	1	1	57.5363	53.5758
DATA	1652	20	37	0	0	A_64_P009848	NM_001034135	4515.23	321.359	6.649282e+003	6.649669e+002	6473	53	1.016657e+001	0	0	0	0	0	0	6386.21	1	1	44.7812	53.3226
DATA	1653	20	38	0	0	A_64_P116685	NM_001166763	4540.8	321.352	3.559553e+003	3.560281e+002	3534	47	1.076134e+001	0	0	0	0	0	0	3405.65	1	1	46.8651	49.3684
DATA	1654	20	39	0	0	A_64_P072659	NM_001109296	4566.23	321.359	1.569565e+003	1.571228e+002	1600	49	1.148298e+001	0	0	0	0	0	0	1495.73	1	1	44.7812	50.5946
DATA	1655	20	40	0	0	A_42_P808442	NM_001108759	4591.43	321.239	6.686783e+002	6.726063e+001	749	48.5	1.151628e+001	0	0	0	0	0	0	634.595	1	1	46.5243	50.2647
DATA	1656	20	41	0	0	A_64_P140836	NM_001017486	4616.99	321.279	1.283833e+002	1.476371e+001	223	48.5	1.189296e+001	0	0	0	0	0	0	121.313	1	1	46.1809	48.9063
DATA	1657	20	42	0	0	A_64_P034384	NM_019227	4642.5	321	3.441186e+002	3.518241e+001	418	50	1.253933e+001	0	0	0	0	0	0	323.704	1	1	48.5334	52.2778
DATA	1658	20	43	0	0	A_42_P730411	NM_001012181	4667.79	321.194	9.615301e+002	9.643401e+001	962	55	1.383027e+001	0	0	0	0	0	0	900.384	1	1	47.5395	54.7407
DATA	1659	20	44	0	0	A_44_P396450	ENSRNOT00000018433	4692.5	321	1.734014e+002	1.884937e+001	265	45	1.026551e+001	0	0	0	0	0	0	161.627	1	1	54.1152	47.2258
DATA	1660	20	45	0	0	A_44_P268610	NM_001109134	4718.36	321.258	4.916116e+003	4.916677e+002	4527.5	51	9.331298e+000	0	0	0	0	0	0	4559.94	1	1	46.1809	50.8387
DATA	1661	20	46	0	0	A_64_P059105	NM_001134544	4743.82	321.127	7.830895e+001	1.081798e+001	172	49	9.615515e+000	0	0	0	0	0	0	72.2753	1	1	46.8651	48.6207
DATA	1662	20	47	0	0	A_42_P524851	NM_001130061	4769	321.203	1.806943e+003	1.808499e+002	1699	49	8.921938e+000	0	0	0	0	0	0	1659.43	1	1	46.8651	49.3793
DATA	1663	20	48	0	0	A_64_P141675	FM127585	4794.67	321.243	3.371936e+003	3.372779e+002	3059	49	1.083078e+001	0	0	0	0	0	0	3080.68	1	1	47.2035	49.0667
DATA	1664	20	49	0	0	A_64_P002979	ENSRNOT00000034762	4820.17	321.414	7.613839e+000	7.579083e+000	92.5	43	1.398219e+001	0	0	0	0	0	0	-6.79041	0	0	42.9674	46.6977
DATA	1665	20	50	0	0	A_44_P175822	NM_001109511	4845.69	321.257	1.432566e+002	1.622590e+001	231	44	9.820645e+000	0	0	0	0	0	0	129.516	1	1	47.2035	44.8485
DATA	1666	20	51	0	0	A_44_P1008751	NM_001137645	4871.21	321.143	1.862238e+002	2.013637e+001	278	47	4.561828e+000	0	0	0	0	0	0	167.462	1	1	45.1352	47.913
DATA	1667	20	52	0	0	A_44_P255350	NM_001007674	4896	321	3.366190e+002	3.453148e+001	401.5	49	1.410329e+001	0	0	0	0	0	0	301.121	1	1	54.9904	51.3077
DATA	1668	20	53	0	0	A_64_P017328	NM_012758	4921.5	321.5	4.999059e+002	5.058650e+001	563	54	1.062418e+001	0	0	0	0	0	0	444.814	1	1	40.6843	52.6818
DATA	1669	20	54	0	0	A_64_P132571	NM_001107703	4947	321.508	1.074701e+004	1.074729e+003	9598	49	1.140780e+001	0	0	0	0	0	0	9510.95	1	1	43.7019	49.5429
DATA	1670	20	55	0	0	A_44_P107535	NM_001170336	4972.6	321.357	4.525308e+002	4.592489e+001	486	51	9.751068e+000	0	0	0	0	0	0	398.298	1	1	47.2035	50.8
DATA	1671	20	56	0	0	A_44_P353618	NM_053587	4997.5	321	1.278062e+002	1.500860e+001	216	50	9.833966e+000	0	0	0	0	0	0	111.889	1	1	54.1152	50.7241
DATA	1672	20	57	0	0	A_44_P213336	A_44_P213336	5022.91	321.065	4.614111e+002	4.681437e+001	510.5	46	9.221804e+000	0	0	0	0	0	0	401.78	1	1	54.4085	46.3333
DATA	1673	20	58	0	0	A_42_P507072	FQ213070	5048.63	321.36	5.716232e+003	5.716785e+002	4967	44	8.972179e+000	0	0	0	0	0	0	4950.82	1	1	48.8603	45
DATA	1674	20	59	0	0	A_44_P428886	NM_001099516	5074.17	321.186	1.958172e+002	2.115150e+001	271	43	8.261254e+000	0	0	0	0	0	0	168.688	1	1	43.7019	45.4103
DATA	1675	20	60	0	0	A_64_P086784	NM_001108657	5099.57	321.392	6.251353e+003	6.251870e+002	5354.5	47.5	1.086408e+001	0	0	0	0	0	0	5357.22	1	1	49.1849	48.1875
DATA	1676	20	61	0	0	A_42_P654682	NM_012724	5124.5	321.352	1.524149e+001	8.221934e+000	118	49.5	1.101049e+001	0	0	0	0	0	0	12.995	1	0	57.5363	49.2647
DATA	1677	20	62	0	0	A_44_P443008	NM_001013068	5150.5	321.705	6.104679e+002	6.158463e+001	624	43.5	1.321423e+001	0	0	0	0	0	0	517.802	1	1	50.4627	48.8889
DATA	1678	20	63	0	0	A_64_P027229	A_64_P027229	5175.56	321.548	1.122696e+003	1.125659e+002	1043	43.5	8.832160e+000	0	0	0	0	0	0	947.543	1	1	49.1849	43.1563
DATA	1679	20	64	0	0	A_64_P134277	ENSRNOT00000029167	5200.97	321.533	4.995257e+001	9.603589e+000	140	41.5	1.089321e+001	0	0	0	0	0	0	41.9523	1	1	43.7019	43.6
DATA	1680	20	65	0	0	A_64_P165548	XM_001055860	5226.09	321.386	6.918342e+001	1.076039e+001	162.5	47	1.085096e+001	0	0	0	0	0	0	57.8261	1	1	65	45.8824
DATA	1681	20	66	0	0	A_64_P014737	NM_001000069	5251.98	321.377	8.318884e+000	8.280909e+000	98	48	1.202626e+001	0	0	0	0	0	0	-2.18009	0	0	44.0646	46.7
DATA	1682	20	67	0	0	A_42_P627330	NM_001106628	5276.76	321.397	7.809046e+002	7.853217e+001	733	46	9.327749e+000	0	0	0	0	0	0	646.739	1	1	46.5243	46.4
DATA	1683	20	68	0	0	A_64_P039452	NM_001109063	5302.5	321.742	2.926752e+002	3.043646e+001	347	48	1.046615e+001	0	0	0	0	0	0	241.334	1	1	46.5243	47.6667
DATA	1684	20	69	0	0	A_44_P516885	ENSRNOT00000005601	5328.12	321.623	5.432038e+004	5.432044e+003	43744	45	9.076441e+000	0	0	0	0	0	0	44600.7	1	1	49.8279	48.1034
DATA	1685	20	70	0	0	A_44_P839176	NM_001107114	5353.48	321.638	4.450603e+003	4.451400e+002	3727	53.5	1.261783e+001	0	0	0	0	0	0	3639.59	1	1	47.5395	51.875
DATA	1686	20	71	0	0	A_64_P083342	AABR03026150	5378.42	321.427	1.777595e+001	8.640480e+000	115	45	1.096112e+001	0	0	0	0	0	0	14.4815	1	0	57.5363	47.2903
DATA	1687	20	72	0	0	A_42_P618185	NM_001108486	5404.06	321.768	4.612427e+003	4.613208e+002	3683	50	1.196518e+001	0	0	0	0	0	0	3744.13	1	1	46.5243	49.9677
DATA	1688	20	73	0	0	A_42_P619957	NM_053830	5429.42	321.427	2.647916e+002	2.781475e+001	308	48	5.528481e+000	0	0	0	0	0	0	214.201	1	1	57.5363	48.4444
DATA	1689	20	74	0	0	A_44_P375042	NM_001014243	5454.58	321.427	3.539951e+002	3.641560e+001	386.5	45	8.341663e+000	0	0	0	0	0	0	285.465	1	1	57.5363	47.8
DATA	1690	20	75	0	0	A_44_P438053	NM_001004201	5480	321.455	1.141395e+002	1.427148e+001	195	47	9.539299e+000	0	0	0	0	0	0	91.7753	1	1	55.8519	47.1765
DATA	1691	20	76	0	0	A_43_P19181	ENSRNOT00000018440	5505.42	321.427	9.890087e+001	1.309970e+001	178	49	1.164466e+001	0	0	0	0	0	0	79.3113	1	1	57.5363	50.0882
DATA	1692	20	77	0	0	A_42_P664259	NM_024396	5530.67	321.5	7.237567e+004	7.237572e+003	56976.5	48	1.023974e+001	0	0	0	0	0	0	57904	1	1	57.5363	48.069
DATA	1693	20	78	0	0	A_44_P588645	FQ230244	5556.79	321.806	1.572361e+002	1.793532e+001	225	49.5	1.051045e+001	0	0	0	0	0	0	125.536	1	1	47.5395	51.1071
DATA	1694	20	79	0	0	A_64_P030844	XM_001065657	5581.58	321.427	8.683280e+000	8.684889e+000	103	47	1.115574e+001	0	0	0	0	0	0	6.73766	0	0	57.5363	49.2174
DATA	1695	20	80	0	0	A_64_P054823	A_64_P054823	5607.41	321.863	1.461433e+004	1.461458e+003	11527	49.5	1.428323e+001	0	0	0	0	0	0	11630.8	1	1	50.1463	49.3
DATA	1696	20	81	0	0	A_42_P516860	XM_001059330	5632.67	322.098	9.745452e+001	1.304039e+001	177	45	3.500518e+000	0	0	0	0	0	0	77.4773	1	1	43.7019	44.9167
DATA	1697	20	82	0	0	A_64_P085772	NM_001191606	5657.67	321.5	9.678509e+001	1.299547e+001	172	46	7.927532e+000	0	0	0	0	0	0	76.8782	1	1	65	45.8438
DATA	1698	20	83	66	1	DarkCorner	DarkCorner	5683.33	321.5	8.715543e+000	8.675758e+000	80	47	9.196552e+000	0	0	0	0	0	0	-17.398	0	0	57.5363	47.0811
DATA	1699	20	84	66	1	DarkCorner	DarkCorner	5708.82	321.567	8.715522e+000	8.675736e+000	74	48.5	1.138319e+001	0	0	0	0	0	0	-18.9805	0	0	42.9674	46.75
DATA	1700	20	85	66	1	DarkCorner	DarkCorner	5734.44	322.208	8.710987e+000	8.671222e+000	90.5	41	8.739442e+000	0	0	0	0	0	0	-6.06806	0	0	47.5395	41.219
DATA	1701	21	1	66	1	DarkCorner	DarkCorner	3588.63	328	7.627754e+000	7.592934e+000	86	44	9.626968e+000	0	0	0	0	0	0	-14.8938	0	0	38.2652	44.9731
DATA	1702	21	2	66	1	DarkCorner	DarkCorner	3613.42	327.573	7.566848e+000	7.532306e+000	80	46	1.139041e+001	0	0	0	0	0	0	-23.1653	0	0	57.5363	49.2069
DATA	1703	21	3	66	1	DarkCorner	DarkCorner	3638.89	327.5	7.507639e+000	7.473367e+000	87	46	1.220347e+001	0	0	0	0	0	0	-15.6232	0	0	56.9804	49.4643
DATA	1704	21	4	0	0	A_44_P277669	NM_001163736	3664.35	328.452	9.006899e+002	9.037386e+001	955	48	1.134426e+001	0	0	0	0	0	0	836.518	1	1	44.0646	48.4054
DATA	1705	21	5	0	0	A_42_P788480	NM_019194	3690.14	328.4	8.946711e+003	8.947014e+002	8307	50.5	8.244454e+000	0	0	0	0	0	0	8368.04	1	1	46.5243	52.1667
DATA	1706	21	6	0	0	A_42_P558354	NM_001007686	3714.89	328.194	4.217648e+003	4.218282e+002	3903.5	45.5	1.163966e+001	0	0	0	0	0	0	3969.85	1	1	47.2035	45.9667
DATA	1707	21	7	0	0	A_44_P714409	NM_001047907	3740.78	328.406	4.746729e+003	4.747286e+002	4522	51	1.028717e+001	0	0	0	0	0	0	4495.81	1	1	46.5243	50.7027
DATA	1708	21	8	0	0	A_42_P604331	NM_001108533	3766.3	328.156	9.281824e+004	9.281827e+003	88623	51.5	1.091008e+001	0	0	0	0	0	0	88410	1	1	48.8603	51.2667
DATA	1709	21	9	0	0	A_64_P139472	NM_173119	3791.26	328.188	4.492221e+003	4.492797e+002	4369	48	9.093701e+000	0	0	0	0	0	0	4301.01	1	1	46.5243	48.1667
DATA	1710	21	10	0	0	A_42_P711589	NM_022948	3816.83	328.323	6.977527e+003	6.977894e+002	6718.5	48	1.114276e+001	0	0	0	0	0	0	6713.28	1	1	45.4864	45.8056
DATA	1711	21	11	0	0	A_42_P813567	NM_031841	3842.09	327.614	1.167702e+005	1.167702e+004	112872	54	1.212817e+001	0	0	0	0	0	0	112834	1	1	57.259	53.6774
DATA	1712	21	12	0	0	A_42_P647505	TC640289	3867.62	328.348	4.520413e+003	4.520970e+002	4421	49	9.390707e+000	0	0	0	0	0	0	4386.2	1	1	45.835	48.7647
DATA	1713	21	13	0	0	A_64_P094313	NM_032073	3892.84	328.365	7.056560e+002	7.091926e+001	779.5	44.5	1.007429e+001	0	0	0	0	0	0	687.188	1	1	44.7812	46.5909
DATA	1714	21	14	0	0	A_42_P577421	NM_001106819	3918.44	328.1	3.756732e+002	3.822325e+001	467	44	8.176941e+000	0	0	0	0	0	0	367.033	1	1	47.8731	44.0645
DATA	1715	21	15	0	0	A_42_P477311	NM_001013170	3943.93	328.32	1.250630e+004	1.250650e+003	12097	49	1.094433e+001	0	0	0	0	0	0	12254.3	1	1	48.2044	47.8182
DATA	1716	21	16	0	0	A_42_P630249	NM_031824	3969.01	328.388	3.647610e+003	3.648284e+002	3748	52.5	9.538283e+000	0	0	0	0	0	0	3583.01	1	1	45.4864	52.6429
DATA	1717	21	17	0	0	A_42_P618256	NM_001024759	3994.43	328.157	9.283594e+002	9.309932e+001	989	54	1.014002e+001	0	0	0	0	0	0	913.851	1	1	47.5395	51.8485
DATA	1718	21	18	0	0	A_64_P101584	A_64_P101584	4020.14	328	3.384704e+002	3.456036e+001	438.5	49	1.266800e+001	0	0	0	0	0	0	333.777	1	1	46.8651	52.0667
DATA	1719	21	19	0	0	A_64_P045461	NM_001106750	4045.56	328.147	3.298247e+002	3.371199e+001	426	50	1.094508e+001	0	0	0	0	0	0	325.724	1	1	46.8651	51.8889
DATA	1720	21	20	0	0	A_64_P056485	ENSRNOT00000033663	4070.84	328.103	1.934260e+003	1.935514e+002	1963	51.5	1.243365e+001	0	0	0	0	0	0	1912.27	1	1	46.5243	52.7188
DATA	1721	21	21	0	0	A_64_P013077	A_64_P013077	4096	328	5.846700e+001	9.091877e+000	162.5	54.5	1.033138e+001	0	0	0	0	0	0	57.845	1	1	54.9904	54.2917
DATA	1722	21	22	0	0	A_44_P348952	NM_001000368	4121.22	328.706	6.991029e+000	6.959115e+000	92	47	9.533724e+000	0	0	0	0	0	0	-7.87028	0	0	40.6843	48.6757
DATA	1723	21	23	0	0	A_64_P147609	NM_001106295	4147.07	328.25	6.049015e+003	6.049415e+002	5968.5	49	6.935702e+000	0	0	0	0	0	0	5988.05	1	1	48.2044	49.6944
DATA	1724	21	24	0	0	A_44_P193928	NM_183328	4172.12	328.348	1.630192e+003	1.631677e+002	1671	49	1.006475e+001	0	0	0	0	0	0	1613.45	1	1	45.835	48.2286
DATA	1725	21	25	0	0	A_44_P441947	XM_001079870	4197.71	328.222	1.339185e+003	1.340995e+002	1475.5	49	1.047183e+001	0	0	0	0	0	0	1324.74	1	1	45.1352	49.2973
DATA	1726	21	26	0	0	A_42_P666259	NM_001009661	4223.09	328.104	1.726525e+004	1.726539e+003	16705	47.5	1.426147e+001	0	0	0	0	0	0	17065	1	1	46.8651	49.7
DATA	1727	21	27	0	0	A_64_P082486	A_64_P082486	4248.57	328.284	1.078164e+003	1.080419e+002	1162	54	1.225648e+001	0	0	0	0	0	0	1064.51	1	1	46.5243	52.3043
DATA	1728	21	28	0	0	A_64_P091940	NM_033237	4273.59	328.182	3.462591e+002	3.532371e+001	439	48	7.511325e+000	0	0	0	0	0	0	341.407	1	1	45.835	49.5
DATA	1729	21	29	0	0	A_64_P144899	NM_001107736	4299.44	328.411	6.211669e+002	6.250964e+001	715.5	51	7.556668e+000	0	0	0	0	0	0	611.452	1	1	47.5395	49.6452
DATA	1730	21	30	0	0	A_44_P410062	XM_224553	4324.88	328.348	2.698415e+002	2.788019e+001	371	45.5	1.134989e+001	0	0	0	0	0	0	265.111	1	1	45.835	49.1316
DATA	1731	21	31	0	0	A_42_P489764	NM_001004099	4349.94	328.235	2.556792e+003	2.557757e+002	2615.5	50	1.006850e+001	0	0	0	0	0	0	2506.57	1	1	46.1809	50.5143
DATA	1732	21	32	0	0	A_42_P640277	NM_001003401	4375.5	328	4.701712e+004	4.701717e+003	45479.5	46	1.234809e+001	0	0	0	0	0	0	45980.6	1	1	54.1152	47.7586
DATA	1733	21	33	0	0	A_44_P212850	NM_019305	4401.18	328.176	7.189920e+001	1.007847e+001	168	44.5	1.102323e+001	0	0	0	0	0	0	70.1273	1	1	46.1809	46.0588
DATA	1734	21	34	0	0	A_64_P125506	NM_021677	4426.55	328.691	2.083266e+002	2.200369e+001	313	51	1.037139e+001	0	0	0	0	0	0	202.621	1	1	41.8414	50.75
DATA	1735	21	35	0	0	A_42_P802358	NM_001024341	4451.66	328.122	1.889348e+004	1.889362e+003	17990	51	1.553835e+001	0	0	0	0	0	0	18318.6	1	1	48.8603	55.0286
DATA	1736	21	36	0	0	A_44_P552852	XM_346367	4477.44	328.065	7.161389e+000	7.128698e+000	97	45	8.859620e+000	0	0	0	0	0	0	-0.909085	0	0	44.0646	46.1471
DATA	1738	21	38	0	0	A_64_P141187	NM_001108899	4527.58	328.427	7.212219e+000	7.182851e+000	103	50	1.010878e+001	0	0	0	0	0	0	2.16798	0	0	57.5363	50
DATA	1739	21	39	0	0	A_44_P274823	NM_001105831	4553.46	328.746	3.632754e+003	3.633469e+002	3479	50	9.211176e+000	0	0	0	0	0	0	3472.02	1	1	47.5395	51.8438
DATA	1740	21	40	0	0	A_42_P804913	ENSRNOT00000022886	4578.5	328.352	7.416524e+001	1.036215e+001	169	49	1.093396e+001	0	0	0	0	0	0	70.5978	1	1	57.5363	50.8611
DATA	1741	21	41	0	0	A_64_P113970	NM_212501	4603.94	328.224	3.882203e+003	3.882883e+002	3640.5	50	1.265295e+001	0	0	0	0	0	0	3679.84	1	1	45.835	52.5385
DATA	1742	21	42	1028	1	(+)E1A_r60_3	E1A_r60_3	4629.42	328.427	2.808674e+001	7.820843e+000	122.5	50	1.363346e+001	0	0	0	0	0	0	26.507	1	0	57.5363	51.6061
DATA	1743	21	43	0	0	A_42_P661992	TC596141	4654.78	328.25	2.366729e+002	2.477704e+001	318.5	55	1.193674e+001	0	0	0	0	0	0	222.353	1	1	45.1352	54.6176
DATA	1744	21	44	0	0	A_42_P577431	NM_001109422	4680.09	328.386	1.164245e+002	1.377699e+001	205	50.5	8.829065e+000	0	0	0	0	0	0	108.877	1	1	57.259	49.2143
DATA	1745	21	45	0	0	A_44_P524785	NM_001000184	4705.5	328.352	7.435218e+000	7.401651e+000	100	50	1.098794e+001	0	0	0	0	0	0	0.692381	0	0	65	49.7879
DATA	1746	21	46	0	0	A_64_P027634	NM_001000223	4730.81	328.43	4.375092e+001	8.628657e+000	141	49	9.227022e+000	0	0	0	0	0	0	40.5233	1	1	58.0869	48.069
DATA	1747	21	47	0	0	A_42_P492976	NM_001126099	4756.62	328.466	4.048399e+002	4.116828e+001	477.5	54	8.386497e+000	0	0	0	0	0	0	373.085	1	1	48.5334	51.6
DATA	1748	21	48	0	0	A_64_P157479	AABR03127998	4781.88	328.5	1.090190e+004	1.090216e+003	10065	48	7.726617e+000	0	0	0	0	0	0	9996.36	1	1	44.4243	47.9063
DATA	1749	21	49	0	0	A_44_P391706	NM_001007796	4807	328.455	1.942047e+002	2.083679e+001	274	49	1.316115e+001	0	0	0	0	0	0	177.169	1	1	55.8519	47.8182
DATA	1750	21	50	0	0	A_44_P184685	NM_001007735	4832.46	328.583	1.180404e+002	1.403385e+001	209	45.5	1.414780e+001	0	0	0	0	0	0	107.127	1	1	48.2044	49.2857
DATA	1751	21	51	0	0	A_44_P475275	NM_001000893	4858.67	328.4	5.084846e+001	9.170740e+000	146.5	44	6.210000e+000	0	0	0	0	0	0	45.8956	1	1	42.9674	45.4444
DATA	1752	21	52	0	0	A_44_P270056	NM_001007800	4883.17	328.464	1.454623e+002	1.644503e+001	235	48.5	1.233500e+001	0	0	0	0	0	0	130.623	1	1	47.2035	48.6786
DATA	1753	21	53	0	0	A_64_P059351	NM_001145175	4908.76	329.03	1.063358e+002	1.313571e+001	197.5	48.5	1.038994e+001	0	0	0	0	0	0	94.9829	1	1	46.1809	50.1591
DATA	1754	21	54	0	0	A_42_P573441	NM_001105742	4934.44	328.74	1.012964e+004	1.012994e+003	9054	48	9.040685e+000	0	0	0	0	0	0	8998.72	1	1	49.5074	50.6552
DATA	1755	21	55	0	0	A_42_P485589	NM_017246	4959.5	328.5	1.172681e+002	1.408170e+001	203	54	7.997869e+000	0	0	0	0	0	0	103.62	1	1	57.5363	52.8182
DATA	1756	21	56	0	0	A_44_P149540	XM_223051	4985.27	328.863	1.990818e+004	1.990833e+003	17276.5	49	1.034980e+001	0	0	0	0	0	0	17496.3	1	1	48.2044	50.4194
DATA	1757	21	57	0	0	A_44_P323236	NM_001000513	5010.38	328.375	1.335452e+001	7.992908e+000	111	47.5	8.853601e+000	0	0	0	0	0	0	11.6735	1	0	45.1352	46.6429
DATA	1759	21	59	0	0	A_64_P100447	NM_001173469	5061	328.455	8.001234e+000	7.978818e+000	105.5	44	8.452089e+000	0	0	0	0	0	0	4.10203	0	0	55.8519	45.3659
DATA	1760	21	60	0	0	A_64_P150008	A_64_P150008	5086.8	328.775	6.722933e+001	1.045517e+001	163	43	9.091597e+000	0	0	0	0	0	0	57.8384	1	1	47.2035	45.1667
DATA	1761	21	61	0	0	A_42_P481696	NM_022508	5111.99	328.808	2.820521e+003	2.821669e+002	2492.5	48	1.067930e+001	0	0	0	0	0	0	2414.04	1	1	47.2035	47.8788
DATA	1762	21	62	0	0	A_64_P033755	AABR03073220	5137.56	328.9	1.097750e+002	1.363653e+001	188	43	9.535520e+000	0	0	0	0	0	0	93.4715	1	1	47.8731	44.6364
DATA	1763	21	63	0	0	A_64_P115980	NM_001109458	5162.94	329.299	2.025093e+002	2.182212e+001	273	45	1.325707e+001	0	0	0	0	0	0	171.576	1	1	45.835	49
DATA	1764	21	64	0	0	A_64_P001426	NM_001126301	5187.72	328.982	1.733630e+002	1.916513e+001	247	43	7.757362e+000	0	0	0	0	0	0	146.165	1	1	42.9674	42.52
DATA	1765	21	65	0	0	A_64_P012987	NM_001108668	5213.75	328.627	3.397076e+003	3.398069e+002	2852	46.5	1.054519e+001	0	0	0	0	0	0	2849.75	1	1	49.1849	44.625
DATA	1767	21	67	0	0	A_42_P668289	TC585832	5264.57	328.608	4.490367e+003	4.491132e+002	3785	49.5	2.208674e+001	0	0	0	0	0	0	3731.92	1	1	49.1849	54.7917
DATA	1768	21	68	0	0	A_64_P052690	ENSRNOT00000036634	5289.87	328.771	6.957873e+002	7.007500e+001	662	49	1.008555e+001	0	0	0	0	0	0	575.728	1	1	46.5243	47.8947
DATA	1769	21	69	0	0	A_42_P593020	NM_013413	5314.89	328.5	5.356452e+001	9.929400e+000	145	50	1.063315e+001	0	0	0	0	0	0	44.133	1	1	65	48.7714
DATA	1770	21	70	0	0	A_64_P037303	NM_001127530	5340.42	328.573	1.321341e+003	1.324006e+002	1122.5	48	1.076092e+001	0	0	0	0	0	0	1084.21	1	1	57.5363	47.8788
DATA	1771	21	71	0	0	A_44_P684180	NM_001037363	5366.15	328.836	8.828591e+003	8.828993e+002	7118.5	42	1.114089e+001	0	0	0	0	0	0	7215.82	1	1	47.5395	44.5333
DATA	1772	21	72	0	0	A_64_P104743	NM_133518	5391.33	328.5	1.500811e+002	1.722826e+001	226	44.5	1.230020e+001	0	0	0	0	0	0	122.206	1	1	57.5363	48.0882
DATA	1773	21	73	0	0	A_44_P941132	NM_001108128	5416.69	328.662	1.087076e+004	1.087109e+003	8529	48	8.150982e+000	0	0	0	0	0	0	8821.02	1	1	48.5334	48.4706
DATA	1774	21	74	0	0	A_44_P187080	NM_001110823	5442.19	328.608	3.237731e+004	3.237742e+003	25348.5	45	5.381140e+000	0	0	0	0	0	0	26185.9	1	1	49.1849	45.96
DATA	1775	21	75	0	0	A_42_P574960	ENSRNOT00000068719	5467.42	328.573	8.131899e+002	8.176651e+001	765	48.5	1.172943e+001	0	0	0	0	0	0	655.702	1	1	57.5363	49.9688
DATA	1776	21	76	0	0	A_64_P094850	A_64_P094850	5492.87	329.257	5.855967e+001	1.037613e+001	149	49	1.155746e+001	0	0	0	0	0	0	47.0937	1	1	46.8651	49.6857
DATA	1777	21	77	0	0	A_43_P13418	NM_172042	5518.54	328.905	6.123143e+003	6.123745e+002	4974	50	1.086193e+001	0	0	0	0	0	0	4911.44	1	1	48.8603	49.3077
DATA	1778	21	78	66	-1	(-)3xSLv1	NegativeControl	5543.58	328.573	8.646914e+000	8.607441e+000	82	48	9.618785e+000	0	0	0	0	0	0	-16.4378	0	0	57.5363	48.0811
DATA	1779	21	79	0	0	A_44_P321594	ENSRNOT00000006966	5569	328.545	2.612422e+001	9.011070e+000	121	46	1.059481e+001	0	0	0	0	0	0	20.867	1	0	65	47.8
DATA	1780	21	80	0	0	A_44_P792531	NM_001025700	5594.42	328.573	2.175628e+002	2.340832e+001	269	49	1.399369e+001	0	0	0	0	0	0	173.502	1	1	57.5363	51.1481
DATA	1781	21	81	0	0	A_43_P14795	NM_001044248	5619.58	328.573	1.460804e+003	1.463362e+002	1208	46	1.088802e+001	0	0	0	0	0	0	1163.48	1	1	57.5363	47.125
DATA	1782	21	82	0	0	A_42_P671502	NM_053467	5645.5	328.674	1.062771e+004	1.062807e+003	8310	45	9.329577e+000	0	0	0	0	0	0	8456.7	1	1	52.9257	45.6786
DATA	1783	21	83	66	1	DarkCorner	DarkCorner	5670.73	329.333	8.700536e+000	8.660819e+000	77	45.5	8.164492e+000	0	0	0	0	0	0	-21.2137	0	0	40.2912	45.913
DATA	1784	21	84	66	1	DarkCorner	DarkCorner	5696.36	329.328	8.702334e+000	8.662608e+000	81	47	1.093344e+001	0	0	0	0	0	0	-16.2851	0	0	44.0646	45.8571
DATA	1785	21	85	66	1	DarkCorner	DarkCorner	5722.17	328.847	8.701496e+000	8.661775e+000	84	47	1.261372e+001	0	0	0	0	0	0	-14.8474	0	0	44.4243	46.8542
DATA	1786	22	1	66	1	DarkCorner	DarkCorner	3600.5	335	7.588488e+000	7.553847e+000	82	46.5	1.148711e+001	0	0	0	0	0	0	-17.9756	0	0	54.1152	49.0435
DATA	1787	22	2	66	1	DarkCorner	DarkCorner	3626.5	335	7.526407e+000	7.492049e+000	78	47.5	1.181607e+001	0	0	0	0	0	0	-23.8567	0	0	54.1152	50.0333
DATA	1788	22	3	66	1	DarkCorner	DarkCorner	3651.5	335	7.470487e+000	7.436385e+000	76.5	45.5	9.099451e+000	0	0	0	0	0	0	-23.0059	0	0	54.1152	47
DATA	1789	22	4	0	0	A_42_P704824	NM_001009640	3677.25	335.277	2.151223e+002	2.274372e+001	302	48.5	9.259558e+000	0	0	0	0	0	0	200.73	1	1	45.1352	49.5357
DATA	1790	22	5	0	0	A_42_P517554	NM_001107060	3702.5	335	1.697070e+002	1.848754e+001	261	47	9.643651e+000	0	0	0	0	0	0	159.405	1	1	54.1152	47.5
DATA	1791	22	6	0	0	A_42_P586883	NM_001106416	3727.5	335	5.990102e+001	9.434269e+000	160	46	9.460444e+000	0	0	0	0	0	0	56.6132	1	1	54.1152	47
DATA	1792	22	7	0	0	A_64_P060302	BF559343	3753.37	335.404	2.696677e+002	2.792303e+001	365	48.5	1.171464e+001	0	0	0	0	0	0	256.404	1	1	57.8122	48.1563
DATA	1793	22	8	0	0	A_64_P055418	NM_001025641	3778.5	335.352	7.239206e+000	7.206160e+000	96	47	7.573792e+000	0	0	0	0	0	0	-4.61059	0	0	57.5363	46.6667
DATA	1794	22	9	0	0	A_44_P317600	NM_012612	3804.12	335.5	4.666515e+002	4.721271e+001	541	47.5	1.033593e+001	0	0	0	0	0	0	448.357	1	1	45.1352	46.3235
DATA	1795	22	10	0	0	A_44_P433359	NM_022710	3829.65	335.306	2.627162e+002	2.722371e+001	357.5	48	1.064047e+001	0	0	0	0	0	0	253.582	1	1	48.2044	46.7667
DATA	1796	22	11	0	0	A_42_P788480	NM_019194	3854.58	335.427	8.920891e+003	8.921174e+002	8598	51	1.214271e+001	0	0	0	0	0	0	8646.53	1	1	57.5363	52.2857
DATA	1797	22	12	0	0	A_44_P269808	NM_001025281	3880.42	335.427	4.617604e+001	8.452400e+000	145	46.5	7.344492e+000	0	0	0	0	0	0	44.93	1	1	65	45.3182
DATA	1798	22	13	0	0	A_64_P108165	NM_001108889	3905.5	335.352	7.088088e+000	7.056305e+000	101.5	46	1.615055e+001	0	0	0	0	0	0	0.878344	0	0	57.5363	51.5714
DATA	1799	22	14	0	0	A_42_P581567	NM_001011899	3930.91	335.386	1.326681e+002	1.501626e+001	236	45	1.060656e+001	0	0	0	0	0	0	129.922	1	1	57.259	45.8286
DATA	1800	22	15	0	0	A_42_P746029	NM_144748	3956.42	335.427	8.876922e+000	7.071201e+000	111	49	9.500487e+000	0	0	0	1	0	0	8.71661	1	0	65	47.5185
DATA	1801	22	16	0	0	A_42_P481087	XM_232226	3981.63	335.559	1.241150e+003	1.243122e+002	1315.5	54	1.023332e+001	0	0	0	0	0	0	1221.55	1	1	46.8651	52.5185
DATA	1802	22	17	0	0	A_64_P031020	ENSRNOT00000032728	4007.19	335.43	7.017473e+000	6.985439e+000	89.5	45	1.004108e+001	0	0	0	0	0	0	-10.1803	0	0	58.0869	47.8519
DATA	1803	22	18	0	0	A_44_P344228	NM_183051	4032.73	335.323	1.741432e+001	7.188437e+000	118.5	48	1.064198e+001	0	0	0	0	0	0	17.2002	1	0	44.4243	48.7
DATA	1804	22	19	0	0	A_64_P009798	NM_021742	4057.95	335.477	6.997462e+000	6.971111e+000	99	50	1.174641e+001	0	0	0	0	0	0	2.76079	0	0	65	51.7667
DATA	1805	22	20	0	0	A_44_P775747	ENSRNOT00000051510	4083.38	335.603	2.587883e+004	2.587893e+003	26768	52.5	1.019811e+001	0	0	0	0	0	0	25616.8	1	1	45.1352	51.1923
DATA	1806	22	21	0	0	A_44_P349475	NM_031333	4108.58	335.427	1.163981e+003	1.166057e+002	1253	47	1.087306e+001	0	0	0	0	0	0	1152.84	1	1	57.5363	49.84
DATA	1807	22	22	0	0	A_64_P114198	NM_001080153	4134.29	336.167	2.770914e+003	2.771786e+002	2801	47.5	8.992413e+000	0	0	0	0	0	0	2745.35	1	1	45.835	47.2222
DATA	1808	22	23	0	0	A_42_P719060	NM_001108994	4159.68	335.941	3.754381e+003	3.755025e+002	3826	49	8.384690e+000	0	0	0	0	0	0	3719.45	1	1	45.835	48
DATA	1809	22	24	0	0	A_44_P163243	NM_175759	4184.89	335.5	6.987990e+000	6.956090e+000	84	51	1.031063e+001	0	0	0	0	0	0	-13.3217	0	0	56.9804	50.8205
DATA	1810	22	25	0	0	A_44_P156864	A_44_P156864	4210.42	335.427	1.008893e+002	1.225719e+001	203	45	1.061138e+001	0	0	0	0	0	0	99.8429	1	1	57.5363	45.5833
DATA	1811	22	26	0	0	A_42_P758052	NM_001031645	4235.75	335.627	5.428595e+003	5.429042e+002	5274	47	1.339611e+001	0	0	0	0	0	0	5367.31	1	1	46.1809	48.7931
DATA	1812	22	27	0	0	A_44_P280659	NM_001100971	4261.11	335.5	7.516136e+001	1.025454e+001	172	48	8.820998e+000	0	0	0	0	0	0	74.2203	1	1	56.9804	51.32
DATA	1813	22	28	0	0	A_42_P768380	NM_001100158	4286.54	335.614	7.857246e+003	7.857557e+002	7539.5	48	6.763237e+000	0	0	0	0	0	0	7747.25	1	1	47.5395	48.7931
DATA	1814	22	29	0	0	A_44_P486312	NM_144737	4311.99	335.771	8.245673e+002	8.275321e+001	899	44.5	1.000413e+001	0	0	0	0	0	0	811.592	1	1	46.8651	47.5556
DATA	1815	22	30	0	0	A_64_P005288	XM_575125	4337.42	336.101	4.362018e+002	4.418029e+001	531	45	8.385273e+000	0	0	0	0	0	0	428.479	1	1	47.2035	46.2069
DATA	1816	22	31	0	0	A_64_P101885	ENSRNOT00000058341	4363.27	336.015	2.706537e+002	2.796324e+001	376	46	1.060734e+001	0	0	0	0	0	0	265.242	1	1	46.1809	47.3947
DATA	1817	22	32	0	0	A_64_P113645	ENSRNOT00000055538	4388.11	335.5	7.079245e+000	7.047548e+000	96.5	44	1.077333e+001	0	0	0	0	0	0	0.913497	0	0	56.9804	46.1351
DATA	1818	22	33	0	0	A_42_P588869	NM_001008348	4413.61	335.638	4.213437e+003	4.214029e+002	4088	46	1.027000e+001	0	0	0	0	0	0	4107.43	1	1	47.5395	47.6296
DATA	1819	22	34	0	0	A_64_P028027	NM_001000473	4438.67	335.5	2.225026e+001	7.428326e+000	121	51.5	1.138886e+001	0	0	0	0	0	0	21.6265	1	0	65	52.1154
DATA	1820	22	35	0	0	A_42_P468805	NM_145721	4464.33	335.5	4.194011e+002	4.253854e+001	500	48	1.163959e+001	0	0	0	0	0	0	406.33	1	1	57.5363	49.9211
DATA	1821	22	36	0	0	A_42_P522194	NM_012914	4489.7	335.776	9.515429e+001	1.189281e+001	190	46	9.394527e+000	0	0	0	0	0	0	91.8794	1	1	45.835	47.4857
DATA	1822	22	37	0	0	A_64_P002969	A_64_P002969	4515.11	335.5	1.360736e+001	7.288178e+000	111	46	9.459465e+000	0	0	0	0	0	0	13.0915	1	0	56.9804	46.4074
DATA	1823	22	38	0	0	A_42_P453935	NM_001198580	4540.45	336.159	6.125235e+003	6.125656e+002	5851	47.5	9.658483e+000	0	0	0	0	0	0	5871.31	1	1	47.2035	49.5625
DATA	1824	22	39	0	0	A_42_P523551	NM_001014087	4565.67	335.5	7.248429e+000	7.215340e+000	98	56	9.820719e+000	0	0	0	0	0	0	-0.13161	0	0	65	53.0882
DATA	1825	22	40	0	0	A_64_P046076	NM_053952	4591.15	336.277	2.748965e+003	2.749919e+002	2587.5	50	1.070242e+001	0	0	0	0	0	0	2613.89	1	1	45.835	52.4483
DATA	1826	22	41	0	0	A_42_P607770	NM_001134616	4616.6	335.849	1.234135e+004	1.234156e+003	11162	49.5	1.093216e+001	0	0	0	0	0	0	11684.2	1	1	48.5334	50.6875
DATA	1827	22	42	0	0	A_64_P089400	NM_022605	4642.09	336.015	2.456032e+002	2.562459e+001	334.5	54	1.267221e+001	0	0	0	0	0	0	231.5	1	1	46.8651	54.0571
DATA	1828	22	43	0	0	A_64_P072064	FQ221714	4667.98	335.56	1.042568e+005	1.042568e+004	97979	53	1.189895e+001	0	0	0	0	0	0	97808.2	1	1	51.0895	54.5806
DATA	1829	22	44	0	0	A_42_P555125	NM_012913	4693.09	335.896	1.176092e+004	1.176115e+003	10751	50	8.502535e+000	0	0	0	0	0	0	10982.9	1	1	46.8651	48.3103
DATA	1830	22	45	0	0	A_42_P768776	NM_001108443	4718.09	336.031	6.932598e+003	6.932994e+002	6485	51	1.040452e+001	0	0	0	0	0	0	6443.58	1	1	46.5243	50.4286
DATA	1831	22	46	0	0	A_42_P593930	NM_001195606	4743.91	335.7	8.307939e+000	7.494955e+000	106	53	9.927891e+000	0	0	0	0	0	0	7.68312	1	0	47.2035	50.2857
DATA	1832	22	47	0	0	A_64_P013545	NM_001115046	4769	335.545	3.284677e+002	3.368899e+001	407	50	1.043693e+001	0	0	0	0	0	0	302.26	1	1	55.8519	50.2
DATA	1833	22	48	0	0	A_42_P548520	NM_001100834	4794.77	336.273	5.466899e+003	5.467417e+002	5035.5	49.5	1.275761e+001	0	0	0	0	0	0	5005.32	1	1	45.4864	49.3571
DATA	1834	22	49	0	0	A_42_P692317	NM_001107565	4820	336.226	9.840128e+002	9.869145e+001	968	46.5	1.306413e+001	0	0	0	0	0	0	896.319	1	1	45.4864	48.6316
DATA	1835	22	50	0	0	A_64_P078303	NM_001106526	4845.56	336.076	3.295528e+001	8.286102e+000	130	47	7.668790e+000	0	0	0	0	0	0	29.8603	1	0	45.4864	47.1034
DATA	1836	22	51	0	0	A_64_P031771	A_64_P031771	4870.71	335.768	3.449598e+001	8.385175e+000	129	47	4.790864e+000	0	0	0	0	0	0	31.092	1	0	46.8651	47
DATA	1837	22	52	0	0	A_44_P393929	NM_001039713	4895.95	336.188	7.437934e+001	1.069333e+001	168	51	1.283204e+001	0	0	0	0	0	0	66.6907	1	1	45.4864	50.6512
DATA	1838	22	53	0	0	A_44_P135730	XM_228802	4921.94	336.167	1.940492e+002	2.088600e+001	275	48	9.081179e+000	0	0	0	0	0	0	173.041	1	1	45.835	49.9697
DATA	1839	22	54	0	0	A_43_P23215	NM_001025737	4946.58	335.573	1.780882e+002	1.942843e+001	260	55	6.602341e+000	0	0	0	0	0	0	157.969	1	1	65	55.5
DATA	1840	22	55	0	0	A_64_P118427	A_64_P118427	4972.42	335.573	3.678504e+001	8.631546e+000	136	49	9.098619e+000	0	0	0	0	0	0	32.4515	1	0	57.5363	48.2571
DATA	1841	22	56	0	0	A_64_P075560	NM_001037526	4997.5	335.648	1.226487e+001	7.945096e+000	113.5	49	9.879196e+000	0	0	0	0	0	0	10.7629	1	0	57.5363	50.2069
DATA	1842	22	57	0	0	A_64_P150311	NM_177935	5022.98	336.241	5.381020e+001	9.551358e+000	150	48	9.069179e+000	0	0	0	0	0	0	46.9725	1	1	43.3362	48.0833
DATA	1843	22	58	0	0	A_44_P272393	NM_001106892	5048.42	336.197	6.190020e+001	1.006267e+001	155	46	8.241398e+000	0	0	0	0	0	0	53.747	1	1	46.1809	47.0714
DATA	1844	22	59	0	0	A_44_P421887	NM_001191565	5073.81	336.132	1.129179e+002	1.382442e+001	200	43	9.812048e+000	0	0	0	0	0	0	97.528	1	1	46.1809	46.325
DATA	1845	22	60	0	0	A_64_P045102	A_64_P045102	5099.21	336.23	2.389445e+003	2.390789e+002	2206	41	7.447518e+000	0	0	0	0	0	0	2053.06	1	1	45.1352	42.5862
DATA	1846	22	61	0	0	A_42_P818546	NM_001191600	5124.72	336.281	1.111668e+003	1.114585e+002	1053	45	9.742862e+000	0	0	0	0	0	0	950.238	1	1	45.1352	46.5294
DATA	1847	22	62	0	0	A_42_P777445	ENSRNOT00000012684	5150.5	336.158	4.501612e+001	9.267437e+000	140.5	49	1.460684e+001	0	0	0	0	0	0	38.2804	1	1	49.1849	51.2174
DATA	1848	22	63	0	0	A_64_P111709	NM_001000554	5175.51	336.261	1.886978e+002	2.055080e+001	262	46.5	8.554005e+000	0	0	0	0	0	0	159.679	1	1	47.2035	46.1364
DATA	1849	22	64	0	0	A_64_P107509	NM_001191874	5200.5	335.648	6.022952e+001	1.015866e+001	154	46	1.155130e+001	0	0	0	0	0	0	50.7169	1	1	65	45.3929
DATA	1850	22	65	0	0	A_64_P121836	ENSRNOT00000007828	5226.09	335.614	3.762138e+001	9.040141e+000	134	48	1.145136e+001	0	0	0	0	0	0	31.5272	1	0	65	46.8462
DATA	1851	22	66	0	0	A_42_P684281	XR_008784	5251.76	336	2.369948e+003	2.371386e+002	2018	49	1.327087e+001	0	0	0	0	0	0	1976.88	1	1	46.8651	51.4333
DATA	1852	22	67	0	0	A_64_P060804	ENSRNOT00000000462	5276.61	335.931	4.158744e+001	9.278994e+000	135	48.5	9.388731e+000	0	0	0	0	0	0	34.5368	1	1	53.8203	47.7
DATA	1853	22	68	0	0	A_64_P075675	A_64_P075675	5302.42	336.109	2.828673e+002	2.948815e+001	329	49	8.529857e+000	0	0	0	0	0	0	233.881	1	1	44.7812	45.9615
DATA	1854	22	69	0	0	A_44_P254973	NM_198051	5327.5	336	5.465375e+001	9.993049e+000	148	49.5	9.925362e+000	0	0	0	0	0	0	45.0017	1	1	65	49.9737
DATA	1855	22	70	0	0	A_42_P492976	NM_001126099	5353.34	336.057	3.916913e+002	4.005974e+001	416	44	8.504292e+000	0	0	0	0	0	0	321.209	1	1	46.8651	44.4333
DATA	1856	22	71	0	0	A_42_P619114	NM_001014204	5378.5	336	7.814304e+001	1.149616e+001	161	43.5	1.318384e+001	0	0	0	0	0	0	63.8395	1	1	54.1152	47.1563
DATA	1857	22	72	0	0	A_42_P541625	NM_001126090	5403.93	336.2	3.304780e+004	3.304791e+003	26355	51	1.170932e+001	0	0	0	0	0	0	26902.4	1	1	46.8651	49.9459
DATA	1858	22	73	0	0	A_42_P469136	NM_001044288	5429.41	336.092	1.342527e+003	1.345209e+002	1161.5	48	8.604190e+000	0	0	0	0	0	0	1089.15	1	1	49.1849	50.2941
DATA	1859	22	74	0	0	A_64_P101480	ENSRNOT00000034261	5454.5	336	7.371276e+001	1.126441e+001	156	45	1.017595e+001	0	0	0	0	0	0	59.6141	1	1	54.1152	46.6296
DATA	1860	22	75	0	0	A_64_P078554	ENSRNOT00000020079	5480	336	3.153492e+002	3.267149e+001	353.5	45	1.170057e+001	0	0	0	0	0	0	254.292	1	1	54.9904	47.8182
DATA	1861	22	76	0	0	A_44_P131067	ENSRNOT00000045483	5506.03	336.077	8.604813e+000	8.565533e+000	94	47	1.027545e+001	0	0	0	0	0	0	-3.89158	0	0	46.5243	46.6571
DATA	1862	22	77	0	0	A_64_P055699	ENSRNOT00000010871	5531	336.203	1.544208e+003	1.546592e+002	1327	47.5	9.028131e+000	0	0	0	0	0	0	1239.04	1	1	46.8651	48.5833
DATA	1863	22	78	0	0	A_64_P117203	NM_001106002	5556.48	336.084	1.841974e+004	1.841994e+003	14362	47	8.664909e+000	0	0	0	0	0	0	14748.6	1	1	49.8279	48.375
DATA	1864	22	79	0	0	A_44_P357870	NM_031559	5581.77	336.116	4.163997e+002	4.252249e+001	433.5	50	1.083736e+001	0	0	0	1	0	0	332.827	1	1	46.5243	51.3448
DATA	1865	22	80	0	0	A_42_P732101	NM_022624	5607.28	336.095	8.943536e+003	8.943953e+002	6877.5	49	1.507115e+001	0	0	0	0	0	0	7138.15	1	1	48.8603	51.2963
DATA	1866	22	81	0	0	A_64_P155054	XM_001062835	5632.72	336.083	4.524143e+001	9.753201e+000	136	45	9.810911e+000	0	0	0	0	0	0	36.0686	1	1	47.8731	46.5714
DATA	1867	22	82	0	0	A_44_P534154	NM_001108852	5657.61	336.069	7.539129e+001	1.147203e+001	160	48	9.785257e+000	0	0	0	0	0	0	60.0605	1	1	53.8203	46.3143
DATA	1868	22	83	66	1	DarkCorner	DarkCorner	5683.74	336.915	8.688626e+000	8.648963e+000	81	45	8.696941e+000	0	0	0	0	0	0	-16.0981	0	0	38.6789	45.5333
DATA	1869	22	84	66	1	DarkCorner	DarkCorner	5709.32	336.841	8.688845e+000	8.649181e+000	82	44	9.964200e+000	0	0	0	0	0	0	-14.1285	0	0	36.9964	46.7838
DATA	1870	22	85	66	1	DarkCorner	DarkCorner	5734	336.319	8.686546e+000	8.646893e+000	84	40	8.878174e+000	0	0	0	0	0	0	-8.63171	0	0	58.0869	40.6676
DATA	1871	23	1	66	1	DarkCorner	DarkCorner	3588.49	342.786	7.607999e+000	7.573269e+000	82.5	44	9.807251e+000	0	0	0	0	0	0	-18.0826	0	0	47.2035	45.1576
DATA	1872	23	2	66	1	DarkCorner	DarkCorner	3613.5	342.5	7.547182e+000	7.512730e+000	84	51	1.539077e+001	0	0	0	0	0	0	-17.1267	0	0	57.5363	51.381
DATA	1873	23	3	66	1	DarkCorner	DarkCorner	3638.89	342.5	7.488873e+000	7.454687e+000	85	45	9.760735e+000	0	0	0	0	0	0	-17.4712	0	0	56.9804	47.3171
DATA	1874	23	4	0	0	A_44_P246268	NM_001106862	3664.72	343.217	7.432543e+000	7.405331e+000	103	43.5	1.021937e+001	0	0	0	0	0	0	2.9361	0	0	44.0646	44.625
DATA	1875	23	5	0	0	A_64_P028396	ENSRNOT00000051835	3689.58	342.427	2.261177e+001	7.689854e+000	122.5	48.5	9.705589e+000	0	0	0	0	0	0	21.1925	1	0	57.5363	51.0385
DATA	1876	23	6	0	0	A_64_P020451	XM_219275	3715.17	343	2.081875e+001	7.592653e+000	119	48	8.625446e+000	0	0	0	0	0	0	19.6409	1	0	46.1809	49.1143
DATA	1878	23	8	0	0	A_64_P106264	ENSRNOT00000029671	3766.14	343.085	2.574016e+003	2.575027e+002	2542	50.5	1.165391e+001	0	0	0	0	0	0	2456.91	1	1	44.0646	49.8438
DATA	1879	23	9	0	0	A_44_P524805	NM_214832	3791.98	342.905	9.224767e+000	7.238140e+000	106.5	47	7.695783e+000	0	0	0	0	0	0	8.85143	1	0	45.4864	46.9259
DATA	1880	23	10	0	0	A_42_P764228	NM_031707	3816.94	342.768	5.781247e+003	5.781688e+002	5647	47.5	1.130360e+001	0	0	0	0	0	0	5573.28	1	1	46.5243	47.3333
DATA	1881	23	11	0	0	A_44_P533760	NM_182843	3842.16	342.794	1.430073e+003	1.431842e+002	1458	54	9.630329e+000	0	0	0	0	0	0	1384.64	1	1	45.1352	52.9189
DATA	1882	23	12	0	0	A_42_P524610	NM_001108992	3867.7	342.9	3.321147e+003	3.321903e+002	3285	47.5	9.728625e+000	0	0	0	0	0	0	3228.61	1	1	47.2035	49.3846
DATA	1883	23	13	0	0	A_42_P570756	NM_134345	3892.67	342.5	1.240765e+005	1.240766e+004	120932	47	1.295950e+001	0	0	0	0	0	0	121041	1	1	57.5363	52.8889
DATA	1884	23	14	0	0	A_44_P362969	NM_053688	3918.83	343.349	7.334490e+001	1.016449e+001	168	46	1.070254e+001	0	0	0	0	0	0	71.7958	1	1	44.4243	48.3125
DATA	1885	23	15	0	0	A_44_P308197	NM_001012190	3943.74	343.222	3.027614e+003	3.028427e+002	3052.5	49	9.207622e+000	0	0	0	0	0	0	2971.89	1	1	47.2035	47.0303
DATA	1886	23	16	0	1	ETG05_36762	ETG05_36762	3969.42	343.274	1.532252e+001	7.165882e+000	116	50	9.113388e+000	0	0	0	0	0	0	15.0783	1	0	44.0646	51.4231
DATA	1887	23	17	0	0	A_42_P744033	NM_001100846	3994.7	342.9	3.713227e+002	3.778367e+001	476	51	8.748574e+000	0	0	0	0	0	0	366.157	1	1	47.2035	48.913
DATA	1888	23	18	0	0	A_42_P726363	NM_031536	4019.67	342.5	1.794061e+001	7.201049e+000	111.5	45	9.916524e+000	0	0	0	0	0	0	17.7209	1	0	65	46.8621
DATA	1889	23	19	0	0	A_64_P010393	NM_053363	4045.38	342.763	5.566441e+003	5.566877e+002	5460.5	49	1.154084e+001	0	0	0	0	0	0	5506.32	1	1	49.1849	51.037
DATA	1890	23	20	0	0	A_42_P612220	NM_001191711	4070.82	342.653	1.049820e+003	1.052122e+002	1140	49.5	1.071774e+001	0	0	0	0	0	0	1039.58	1	1	47.5395	51.0313
DATA	1891	23	21	0	0	A_44_P393551	NM_012567	4096.41	343.012	4.634306e+004	4.634311e+003	45991	51	9.352240e+000	0	0	0	0	0	0	45927.3	1	1	50.4627	50.1852
DATA	1892	23	22	0	0	A_44_P278688	NM_053682	4121.62	343.441	2.185455e+003	2.186559e+002	2247	50	1.316377e+001	0	0	0	0	0	0	2166.84	1	1	46.8651	51.8519
DATA	1893	23	23	0	0	A_44_P186989	NM_001000076	4146.58	342.573	9.599979e+000	7.013741e+000	111	48	5.509011e+000	0	0	0	0	0	0	9.51823	1	0	57.5363	48.1429
DATA	1894	23	24	0	0	A_42_P640277	NM_001003401	4172.42	342.573	4.656839e+004	4.656844e+003	45455	51	9.184192e+000	0	0	0	0	0	0	46162	1	1	57.5363	51.8824
DATA	1895	23	25	0	0	A_44_P398792	NM_053867	4197.91	342.896	1.695384e+004	1.695398e+003	16972	49.5	1.056294e+001	0	0	0	0	0	0	16797.8	1	1	46.8651	51
DATA	1896	23	26	0	0	A_64_P052552	ENSRNOT00000056797	4223	342.545	1.289894e+002	1.465611e+001	233	48	1.172803e+001	0	0	0	0	0	0	127.695	1	1	55.8519	48.7586
DATA	1897	23	27	0	0	A_64_P119254	NM_001013202	4248.42	342.573	6.997918e+000	6.965973e+000	97	48	1.186083e+001	0	0	0	0	0	0	-5.45626	0	0	57.5363	52.375
DATA	1898	23	28	0	0	A_64_P159614	NM_053614	4274	343.226	7.077627e+003	7.077971e+002	7195.5	49	7.055539e+000	0	0	0	0	0	0	6989.82	1	1	45.4864	50.6296
DATA	1899	23	29	0	0	A_42_P814107	NM_001024750	4299.45	343.014	1.716260e+002	1.853023e+001	269	50	9.471179e+000	0	0	0	0	0	0	169.214	1	1	48.5334	51.3548
DATA	1900	23	30	0	0	A_64_P150751	NM_212494	4324.69	343.319	4.754836e+002	4.806083e+001	576.5	45.5	1.040921e+001	0	0	0	0	0	0	467.931	1	1	47.5395	47.3611
DATA	1902	23	32	0	0	A_44_P838888	ENSRNOT00000038829	4375.42	342.573	4.591072e+001	8.398234e+000	147.5	47	1.120164e+001	0	0	0	0	0	0	44.9727	1	1	57.5363	48.9118
DATA	1903	23	33	0	0	A_43_P12927	NM_053769	4401.09	343.328	3.530328e+002	3.600041e+001	455.5	44	1.106410e+001	0	0	0	0	0	0	344.93	1	1	45.1352	45.4054
DATA	1904	23	34	0	0	A_64_P140806	A_64_P140806	4426.42	342.573	3.618657e+004	3.618664e+003	35042.5	50	1.033513e+001	0	0	0	0	0	0	35252.2	1	1	57.5363	49.2593
DATA	1905	23	35	0	0	A_42_P607026	NM_001106839	4451.74	342.778	8.111728e+003	8.112038e+002	7675.5	52	1.315154e+001	0	0	0	0	0	0	7878.23	1	1	47.5395	53.0857
DATA	1906	23	36	0	0	A_44_P272186	NM_001107950	4476.95	343.222	3.196436e+001	7.800522e+000	129	46.5	7.958869e+000	0	0	0	0	0	0	30.9448	1	0	45.4864	47.2
DATA	1907	23	37	0	0	A_44_P226658	NM_017046	4502.8	343.554	4.450651e+001	8.414020e+000	137	46	9.624342e+000	0	0	0	0	0	0	42.9359	1	1	44.7812	46.8065
DATA	1908	23	38	0	0	A_64_P119279	NM_001108109	4527.35	343.387	2.054884e+004	2.054896e+003	19797.5	46.5	1.093856e+001	0	0	0	0	0	0	19753	1	1	44.4243	49
DATA	1909	23	39	0	0	A_44_P1042876	NM_212504	4553.09	343.328	5.683233e+003	5.683689e+002	5359	57	9.752529e+000	0	0	0	0	0	0	5441.8	1	1	45.1352	54.3871
DATA	1910	23	40	0	0	A_64_P119607	ENSRNOT00000037601	4578.96	343.394	2.561805e+002	2.661702e+001	351.5	56.5	1.146018e+001	0	0	0	0	0	0	244.296	1	1	47.2035	53.5833
DATA	1911	23	41	0	0	A_42_P784252	NM_133557	4604.09	343.328	1.663263e+004	1.663279e+003	15538.5	49	9.896260e+000	0	0	0	0	0	0	15795.3	1	1	45.1352	51.3103
DATA	1912	23	42	0	0	A_44_P1033194	NM_139328	4629.38	343.344	4.358323e+003	4.358932e+002	4284.5	50	1.254342e+001	0	0	0	0	0	0	4121.09	1	1	45.1352	53.3214
DATA	1913	23	43	0	0	A_42_P800048	NM_207610	4655.16	343.103	8.699495e+003	8.699803e+002	8033	55	1.106934e+001	0	0	0	0	0	0	8188.39	1	1	46.5243	55.303
DATA	1914	23	44	0	0	A_43_P11525	NM_012710	4680.09	342.935	5.648698e+001	9.271361e+000	149	52	8.833587e+000	0	0	0	0	0	0	52.9271	1	1	54.4085	50.0323
DATA	1915	23	45	0	0	A_64_P019037	NM_001013886	4705.79	343.194	4.547300e+004	4.547306e+003	40893	50	9.216463e+000	0	0	0	0	0	0	42405.2	1	1	47.5395	49.5455
DATA	1916	23	46	0	0	A_64_P003378	NM_001024336	4730.61	342.931	2.254379e+002	2.373418e+001	319.5	51	9.733755e+000	0	0	0	0	0	0	209.23	1	1	53.8203	49.2647
DATA	1917	23	47	0	0	A_44_P258855	NM_053431	4756.64	343.13	5.628323e+003	5.628817e+002	5342.5	51	1.078907e+001	0	0	0	0	0	0	5197.43	1	1	46.8651	50.7586
DATA	1918	23	48	0	1	ETG09_35454	ETG09_35454	4782.3	343.283	7.531907e+000	7.497525e+000	93	47	8.537267e+000	0	0	0	0	0	0	-5.00364	0	0	44.0646	47.9722
DATA	1919	23	49	0	0	A_64_P089677	NM_001105977	4807	343	1.936495e+002	2.077932e+001	275	50	1.406537e+001	0	0	0	0	0	0	177.032	1	1	65	49.8125
DATA	1920	23	50	0	0	A_64_P013609	A_64_P013609	4833.04	343.176	1.132414e+001	7.659268e+000	110.5	47.5	1.060022e+001	0	0	0	0	0	0	10.2978	1	0	46.8651	48.7308
DATA	1921	23	51	0	0	A_44_P357470	NM_030849	4858.24	343	1.133893e+003	1.136447e+002	1156	47	7.598245e+000	0	0	0	0	0	0	1025.76	1	1	46.8651	48
DATA	1922	23	52	0	0	A_44_P404064	ENSRNOT00000015387	4883.37	343.134	1.579018e+003	1.580872e+002	1561	47	9.885636e+000	0	0	0	0	0	0	1421.02	1	1	45.835	47.125
DATA	1923	23	53	0	0	A_64_P092167	A_64_P092167	4909.2	343.214	2.185268e+001	8.000095e+000	120	49	9.215774e+000	0	0	0	0	0	0	19.5604	1	0	42.2201	49.3415
DATA	1924	23	54	0	0	A_42_P463036	ENSRNOT00000038596	4934.54	343.377	4.459554e+003	4.460225e+002	3975	53.5	7.473504e+000	0	0	0	0	0	0	3970.65	1	1	46.8651	51.125
DATA	1925	23	55	0	0	A_44_P1003794	NM_012576	4960.06	343.313	2.343795e+003	2.345086e+002	2104	51.5	9.538126e+000	0	0	0	0	0	0	2075.63	1	1	45.835	51.0435
DATA	1926	23	56	0	0	A_64_P099006	BC105831	4984.9	343.823	7.854574e+000	7.818719e+000	90	48	9.142833e+000	0	0	0	0	0	0	-10.4867	0	0	44.0646	47.5161
DATA	1927	23	57	0	0	A_42_P795467	NM_001108055	5010.44	343.118	1.993075e+003	1.994625e+002	1802	48.5	8.964810e+000	0	0	0	0	0	0	1746.37	1	1	47.2035	48.3333
DATA	1928	23	58	0	0	A_42_P629321	NM_031590	5035.93	343.149	5.973840e+001	9.907352e+000	152.5	46	6.550055e+000	0	0	0	0	0	0	52.0656	1	1	46.5243	46.25
DATA	1929	23	59	0	0	A_42_P549786	NM_022609	5061.15	343.215	6.714993e+003	6.715463e+002	5779	47.5	1.057051e+001	0	0	0	0	0	0	5821.95	1	1	45.835	48.4167
DATA	1930	23	60	0	0	A_64_P006354	ENSRNOT00000043959	5086.88	343.294	5.060168e+001	9.455334e+000	146	43	9.545743e+000	0	0	0	0	0	0	43.6406	1	1	45.835	44.6061
DATA	1931	23	61	0	0	A_64_P057109	A_64_P057109	5112.18	343.639	1.410770e+003	1.413052e+002	1304.5	44	7.555867e+000	0	0	0	0	0	0	1210.51	1	1	47.8731	44.3448
DATA	1932	23	62	0	0	A_44_P101361	NM_032070	5137.42	343.427	2.077224e+001	8.332384e+000	121.5	46	1.135347e+001	0	0	0	0	0	0	17.7327	1	0	65	46.087
DATA	1933	23	63	0	0	A_64_P103354	ENSRNOT00000066893	5162.5	343.352	1.059051e+003	1.062151e+002	991	46.5	1.169017e+001	0	0	0	0	0	0	899.599	1	1	57.5363	46.7727
DATA	1934	23	64	0	0	A_42_P746868	NM_001127580	5188.44	343.534	3.325274e+004	3.325284e+003	27424.5	43	1.059695e+001	0	0	0	0	0	0	28105.3	1	1	49.1849	44.8462
DATA	1935	23	65	0	0	A_42_P707838	NM_012979	5213.57	343.392	3.257542e+003	3.258571e+002	2751	48	9.821635e+000	0	0	0	0	0	0	2740.12	1	1	49.1849	46.2581
DATA	1936	23	66	0	0	A_42_P628098	NM_001107991	5239	343.271	1.388062e+003	1.390499e+002	1266	49	1.069787e+001	0	0	0	0	0	0	1162.08	1	1	46.8651	50
DATA	1937	23	67	0	0	A_64_P028071	ENSRNOT00000042928	5264.42	343.427	2.623641e+005	2.623642e+004	219423	54.5	1.403868e+001	0	0	0	0	0	0	218656	1	1	57.5363	54.7308
DATA	1938	23	68	0	0	A_64_P002944	A_64_P002944	5290.19	343.412	8.876864e+003	8.877252e+002	7509	48.5	9.156615e+000	0	0	0	0	0	0	7364.92	1	1	46.5243	47.05
DATA	1939	23	69	0	0	A_64_P072159	XM_574060	5315.13	343.356	1.965734e+001	8.566175e+000	116.5	51	1.089346e+001	0	0	0	0	0	0	16.241	1	0	37.4241	49.3824
DATA	1940	23	70	0	0	A_64_P052365	NM_001109318	5340.58	343.746	2.013515e+002	2.180597e+001	265	47.5	9.783260e+000	0	0	0	0	0	0	165.691	1	1	42.9674	48.075
DATA	1941	23	71	0	0	A_64_P023150	ENSRNOT00000042777	5365.78	343.754	1.850173e+002	2.032078e+001	247	43.5	7.506319e+000	0	0	0	0	0	0	151.662	1	1	45.1352	42
DATA	1942	23	72	0	0	A_44_P374902	NM_133429	5391.47	343.8	4.073550e+002	4.159964e+001	432	42	1.140832e+001	0	0	0	0	0	0	332.673	1	1	47.2035	44.5385
DATA	1943	23	73	0	0	A_44_P163271	NM_198733	5416.58	343.427	1.056395e+001	8.530376e+000	106	48	1.042323e+001	0	0	0	0	0	0	8.59692	1	0	65	50.0571
DATA	1944	23	74	0	0	A_42_P548520	NM_001100834	5442.63	343.523	5.440807e+003	5.441470e+002	4437	47	9.900831e+000	0	0	0	0	0	0	4413.04	1	1	52.9257	46.7857
DATA	1945	23	75	0	0	A_64_P012154	XM_225935	5467.42	343.427	3.791172e+001	9.323642e+000	129.5	50	1.163730e+001	0	0	0	0	0	0	30.6593	1	0	57.5363	48.52
DATA	1946	23	76	0	0	A_64_P033574	NM_001000606	5492.58	343.427	8.580594e+000	8.541424e+000	91	44	1.081632e+001	0	0	0	0	0	0	-8.86118	0	0	65	47.25
DATA	1947	23	77	0	0	A_64_P027764	NM_022685	5518.48	343.638	2.113570e+002	2.280438e+001	274	45	8.433165e+000	0	0	0	0	0	0	170.031	1	1	47.5395	47.4194
DATA	1948	23	78	0	0	A_42_P484738	NM_022266	5543.93	343.662	1.074677e+003	1.078098e+002	946	46.5	1.000000e+001	0	0	0	0	0	0	862.643	1	1	45.835	48.3333
DATA	1949	23	79	0	0	A_64_P036355	NM_053311	5569.37	343.64	2.929530e+004	2.929542e+003	22934.5	46	9.810395e+000	0	0	0	0	0	0	23470.2	1	1	48.8603	47.6207
DATA	1950	23	80	0	0	A_42_P694928	NM_001109046	5594.47	343.722	3.732433e+002	3.830492e+001	399	47.5	1.609012e+001	0	0	0	0	0	0	298.56	1	1	48.2044	50.7333
DATA	1951	23	81	0	0	A_42_P588738	NM_133542	5619.58	343.427	6.114950e+001	1.057122e+001	150.5	45	1.244610e+001	0	0	0	0	0	0	48.8492	1	1	57.5363	46.303
DATA	1952	23	82	0	0	A_64_P141254	XM_001060542	5645.11	343.5	4.098153e+001	9.554648e+000	131	51	9.375783e+000	0	0	0	0	0	0	32.7077	1	0	56.9804	46.9697
DATA	1953	23	83	0	0	A_42_P546054	NM_001013873	5671	343.5	3.952582e+002	4.045831e+001	413.5	45.5	1.056357e+001	0	0	0	1	0	0	315.272	1	1	48.5334	46.475
DATA	1954	23	84	66	1	DarkCorner	DarkCorner	5695.89	343.5	8.677624e+000	8.638012e+000	78.5	44	1.248447e+001	0	0	0	0	0	0	-20.5333	0	0	56.9804	45.5938
DATA	1955	23	85	66	1	DarkCorner	DarkCorner	5721.42	343.427	8.676246e+000	8.636640e+000	81	44	9.049685e+000	0	0	0	0	0	0	-17.3651	0	0	57.5363	45.275
DATA	1956	24	1	66	1	DarkCorner	DarkCorner	3600.58	349.573	7.568960e+000	7.534409e+000	83	48	1.324672e+001	0	0	0	0	0	0	-15.2945	0	0	57.5363	49.7872
DATA	1957	24	2	66	1	DarkCorner	DarkCorner	3626.42	349.573	7.508084e+000	7.473810e+000	86.5	48.5	1.206787e+001	0	0	0	0	0	0	-17.1085	0	0	65	49.6905
DATA	1958	24	3	0	0	A_64_P000371	NM_017308	3651.85	350.258	1.013038e+003	1.015749e+002	1060	44.5	8.490142e+000	0	0	0	0	0	0	940.849	1	1	44.7812	46.1579
DATA	1959	24	4	0	0	A_42_P772356	NM_001191597	3677.33	350.342	7.585489e+003	7.585847e+002	7253	47.5	7.280407e+000	0	0	0	0	0	0	7095.05	1	1	47.5395	47.3636
DATA	1961	24	6	0	0	A_42_P470757	NM_001004075	3727.93	350.418	5.413950e+003	5.414438e+002	5010.5	47	8.886088e+000	0	0	0	0	0	0	5129.04	1	1	45.835	46.6471
DATA	1962	24	7	0	0	A_64_P034250	ENSRNOT00000041464	3753.55	350.258	3.345560e+001	7.965752e+000	137.5	48.5	1.021251e+001	0	0	0	0	0	0	31.8795	1	0	46.1809	45.8462
DATA	1963	24	8	0	0	A_64_P065063	NM_012954	3778.5	349.648	5.495137e+001	9.050835e+000	159	47.5	1.077593e+001	0	0	0	0	0	0	52.6349	1	1	57.5363	49.7778
DATA	1964	24	9	0	0	A_64_P088866	ENSRNOT00000049194	3803.91	349.614	3.013492e+002	3.097295e+001	397.5	46	1.190428e+001	0	0	0	0	0	0	290.082	1	1	57.259	48.3871
DATA	1965	24	10	0	0	A_44_P111759	NM_001000956	3829.42	349.573	7.156144e+000	7.123477e+000	98.5	48	9.474867e+000	0	0	0	0	0	0	-1.42662	0	0	57.5363	48.1429
DATA	1966	24	11	0	0	A_64_P045019	ENSRNOT00000032417	3854.87	350.233	1.725370e+003	1.726827e+002	1816.5	46	1.060883e+001	0	0	0	0	0	0	1675.59	1	1	44.4243	49.2121
DATA	1967	24	12	0	0	A_64_P138989	XM_001053562	3880.37	349.596	5.710074e+001	9.085538e+000	156	48	1.095872e+001	0	0	0	0	0	0	55.6593	1	1	57.8122	51.7368
DATA	1968	24	13	0	0	A_42_P537715	NM_001025743	3905.5	349.648	2.842382e+003	2.843254e+002	2771	46	1.266291e+001	0	0	0	0	0	0	2779.96	1	1	57.5363	51.1176
DATA	1969	24	14	0	0	A_42_P453171	NM_001107063	3931	350.424	2.035114e+003	2.036325e+002	2056	49	8.516139e+000	0	0	0	0	0	0	1996.65	1	1	45.4864	50.1034
DATA	1971	24	16	0	0	A_64_P096157	ENSRNOT00000059486	3981.66	350.164	2.595270e+002	2.687679e+001	356	50	9.232964e+000	0	0	0	0	0	0	255.868	1	1	48.2044	49.9524
DATA	1972	24	17	0	0	A_43_P10076	NM_031665	4007.5	350	1.811619e+004	1.811632e+003	17254.5	48	8.665845e+000	0	0	0	0	0	0	17895.4	1	1	48.5334	48.4074
DATA	1974	24	19	0	0	A_42_P772878	NM_001011936	4058	350.203	5.851498e+003	5.851911e+002	5750	46.5	1.010292e+001	0	0	0	0	0	0	5796.47	1	1	46.8651	47
DATA	1976	24	21	0	0	A_44_P447394	NM_019193	4108.56	350.314	1.103152e+004	1.103174e+003	10722	53.5	1.123538e+001	0	0	0	0	0	0	10944	1	1	46.8651	53.0769
DATA	1977	24	22	0	0	A_42_P504250	NM_001134987	4134.16	350.371	1.588427e+003	1.589943e+002	1706	50.5	1.402786e+001	0	0	0	0	0	0	1576.23	1	1	44.0646	52.7917
DATA	1978	24	23	0	0	A_42_P675802	NM_145777	4159.67	350.377	2.769775e+003	2.770645e+002	2711	49	9.488080e+000	0	0	0	0	0	0	2748.34	1	1	46.8651	48.0968
DATA	1979	24	24	0	0	A_64_P111843	XM_001074913	4184.61	350.069	1.710393e+003	1.711803e+002	1826	51	1.135815e+001	0	0	0	0	0	0	1696.5	1	1	53.8203	51.4848
DATA	1980	24	25	0	0	A_44_P118724	NM_019361	4210.56	350	1.694015e+004	1.694029e+003	16274	49	1.094787e+001	0	0	0	0	0	0	16791.1	1	1	49.8279	49.8214
DATA	1981	24	26	0	0	A_43_P21749	NM_001108329	4235.85	350.076	3.698543e+001	7.878382e+000	139.5	46.5	9.505220e+000	0	0	0	0	0	0	36.6255	1	1	46.1809	47.1429
DATA	1982	24	27	0	0	A_43_P11879	NM_017250	4261.49	349.954	6.557062e+001	9.565916e+000	164	46	9.628028e+000	0	0	0	0	0	0	64.8508	1	1	44.4243	49.0323
DATA	1983	24	28	0	0	A_64_P023182	NM_001000033	4286.73	350.182	7.771422e+000	7.018454e+000	106	50	9.040400e+000	0	0	0	0	0	0	7.6748	1	0	41.0736	51.8929
DATA	1985	24	30	0	0	A_44_P368461	NM_001107085	4337.5	350	7.034062e+000	7.014523e+000	105.5	42	8.249770e+000	0	0	0	0	0	0	4.12966	0	0	54.1152	43.0606
DATA	1986	24	31	0	0	A_64_P097257	A_64_P097257	4362.89	350.212	7.008855e+001	9.918288e+000	170	45	7.225306e+000	0	0	0	0	0	0	68.7987	1	1	45.835	45.9714
DATA	1987	24	32	0	0	A_64_P100634	NM_001100171	4388.21	350.194	2.844162e+002	2.929883e+001	378.5	45	1.144364e+001	0	0	0	0	0	0	278.483	1	1	47.5395	48.1282
DATA	1988	24	33	0	0	A_64_P041902	NM_001025653	4413.5	350.056	5.393230e+003	5.393691e+002	5227.5	47.5	1.088430e+001	0	0	0	0	0	0	5266.25	1	1	48.5334	47.3235
DATA	1990	24	35	0	0	A_64_P116171	NM_001004266	4464.5	350.429	2.554298e+002	2.651084e+001	352	51.5	8.920237e+000	0	0	0	0	0	0	247.895	1	1	47.2035	50.5278
DATA	1991	24	36	0	0	A_44_P243279	NM_001134780	4489.93	349.883	3.880015e+002	3.944846e+001	478	46.5	8.319714e+000	0	0	0	0	0	0	375.261	1	1	44.4243	47.1579
DATA	1992	24	37	0	0	A_64_P151468	XM_001062494	4515	350.455	1.700977e+001	7.346730e+000	116	47	1.006893e+001	0	0	0	0	0	0	16.3945	1	0	55.8519	49.2609
DATA	1993	24	38	0	0	A_64_P075769	ENSRNOT00000043984	4540.76	350.619	6.143591e+003	6.144010e+002	6134	54	1.218237e+001	0	0	0	0	0	0	5898.97	1	1	44.7812	52.2222
DATA	1994	24	39	0	0	A_42_P508921	NM_031703	4565.58	350.427	7.235016e+000	7.211920e+000	108.5	56	1.050940e+001	0	0	0	0	0	0	3.61887	0	0	65	53.3243
DATA	1995	24	40	0	0	A_44_P503376	NM_001000274	4591.42	350.427	7.265200e+000	7.232035e+000	95	57	1.207142e+001	0	0	0	0	0	0	-4.02401	0	0	57.5363	58.1724
DATA	1996	24	41	0	0	A_64_P093088	NM_001000816	4616.58	350.427	1.919237e+001	7.511856e+000	117.5	49	8.567195e+000	0	0	0	0	0	0	18.2041	1	0	65	50.2857
DATA	1997	24	42	0	0	A_44_P489608	NM_023967	4642	350.455	1.174530e+002	1.382614e+001	211	55	1.099888e+001	0	0	0	0	0	0	110.917	1	1	65	55.2414
DATA	1998	24	43	0	0	A_44_P213088	ENSRNOT00000037507	4667.42	350.427	2.227554e+001	7.658785e+000	122	54.5	1.279049e+001	0	0	0	0	0	0	20.9407	1	0	65	54.3
DATA	1999	24	44	0	0	A_64_P060725	NM_001025278	4692.58	350.427	7.395313e+000	7.361554e+000	101	49	9.265187e+000	0	0	0	0	0	0	-1.29482	0	0	57.5363	48.7429
DATA	2000	24	45	0	0	A_44_P384698	XM_216321	4718.52	350.638	2.126419e+003	2.127705e+002	2118	51.5	9.809495e+000	0	0	0	0	0	0	1980.18	1	1	47.5395	53.3214
DATA	2001	24	46	0	0	A_42_P696084	NM_031022	4743.76	350.5	2.865275e+003	2.866239e+002	2816.5	48.5	1.080824e+001	0	0	0	0	0	0	2655.28	1	1	46.5243	48.55
DATA	2002	24	47	0	0	A_64_P014918	NM_001108246	4769.01	350.472	1.267786e+003	1.269985e+002	1239	50	9.814955e+000	0	0	0	0	0	0	1169.07	1	1	48.5334	51
DATA	2003	24	48	0	0	A_64_P032690	ENSRNOT00000049975	4794.42	350.427	8.423546e+004	8.423549e+003	77269	51	1.226083e+001	0	0	0	0	0	0	77284.6	1	1	57.5363	50.4286
DATA	2004	24	49	0	0	A_42_P481516	NM_134364	4819.88	350.5	4.311309e+003	4.311969e+002	3900.5	45	1.240593e+001	0	0	0	1	0	0	3935.32	1	1	44.4243	46.4167
DATA	2005	24	50	0	0	A_64_P166158	ENSRNOT00000013694	4845.33	350.5	1.208466e+002	1.426840e+001	209	52	8.925544e+000	0	0	0	0	0	0	109.735	1	1	65	51.0357
DATA	2006	24	51	0	0	A_64_P140338	A_64_P140338	4870.95	350.031	7.661787e+000	7.626811e+000	93	48	6.366007e+000	0	0	0	0	0	0	-6.84776	0	0	46.1809	48.0571
DATA	2007	24	52	0	1	ERCC-00062_278	ERCC-00062_278	4895.89	350.5	1.238149e+002	1.456255e+001	215	49	1.035423e+001	0	0	0	0	0	0	111.26	1	1	56.9804	49.7143
DATA	2008	24	53	0	0	A_64_P110838	NM_001013175	4921.42	350.427	2.131014e+002	2.266098e+001	290	51.5	8.874517e+000	0	0	0	0	0	0	190.471	1	1	57.5363	50.2188
DATA	2009	24	54	0	0	A_42_P802358	NM_001024341	4946.74	350.778	1.903578e+004	1.903594e+003	16728	50	9.003753e+000	0	0	0	0	0	0	16925.1	1	1	47.5395	50.3514
DATA	2010	24	55	0	0	A_64_P010421	A_64_P010421	4971.97	350.726	4.246188e+001	8.871116e+000	137	48	9.130231e+000	0	0	0	0	0	0	37.5537	1	1	48.2044	48.1944
DATA	2011	24	56	0	0	A_43_P13320	NM_138880	4997.5	350.5	7.866903e+000	7.830991e+000	89	49	1.113770e+001	0	0	0	0	0	0	-12.1641	0	0	57.5363	50.125
DATA	2012	24	57	0	0	A_42_P800916	NM_022403	5022.89	350.5	3.602725e+001	8.657886e+000	134.5	48	9.859525e+000	0	0	0	0	0	0	31.5237	1	0	56.9804	49.0909
DATA	2013	24	58	0	0	A_42_P554610	XM_001064863	5048.57	350.608	1.429092e+004	1.429114e+003	12069.5	46	8.691483e+000	0	0	0	0	0	0	12438.1	1	1	49.1849	47.5517
DATA	2014	24	59	0	0	A_42_P476353	NM_001012113	5073.93	350.493	1.289766e+004	1.289790e+003	10842	50	1.040950e+001	0	0	0	0	0	0	11166.6	1	1	47.8731	49.4359
DATA	2015	24	60	0	0	A_43_P12234	NM_022516	5099.3	350.507	3.271490e+003	3.272468e+002	2863	43	7.694449e+000	0	0	0	0	0	0	2817.77	1	1	46.8651	42.7273
DATA	2016	24	61	0	0	A_64_P048315	ENSRNOT00000044039	5124.8	350.789	4.573078e+002	4.643193e+001	500	46	6.921003e+000	0	0	0	0	0	0	391.881	1	1	47.5395	44.8519
DATA	2017	24	62	0	0	A_44_P477047	NM_171983	5149.89	350.5	6.822504e+004	6.822508e+003	57710	42.5	8.415716e+000	0	0	0	0	0	0	58170.2	1	1	56.9804	43.7083
DATA	2018	24	63	0	0	A_43_P11871	NM_017230	5175.42	350.573	7.372872e+001	1.096751e+001	158.5	46	1.068019e+001	0	0	0	0	0	0	62.5509	1	1	57.5363	46.069
DATA	2019	24	64	0	0	A_64_P060608	XM_001068783	5200.58	350.573	2.543682e+001	8.546071e+000	127	50	1.137948e+001	0	0	0	0	0	0	21.4768	1	0	57.5363	49.6774
DATA	2020	24	65	0	0	A_64_P115811	NM_001008516	5226.11	350.5	2.218501e+001	8.492739e+000	121	49	1.000378e+001	0	0	0	0	0	0	18.6418	1	0	56.9804	48.5714
DATA	2021	24	66	0	0	A_44_P131296	ENSRNOT00000039892	5251.5	350.5	3.489359e+001	8.944502e+000	126.5	49	7.914870e+000	0	0	0	0	0	0	29.1856	1	0	57.5363	51.3871
DATA	2022	24	67	0	0	A_44_P668388	NM_001109245	5276.67	350.5	2.956424e+002	3.069980e+001	347	48.5	8.623473e+000	0	0	0	0	0	0	246.185	1	1	57.5363	47.5833
DATA	2023	24	68	0	0	A_64_P069729	NM_019189	5302.42	350.573	7.734531e+001	1.135155e+001	164	48	9.447307e+000	0	0	0	0	0	0	64.1253	1	1	57.5363	47.4194
DATA	2024	24	69	1028	1	(+)E1A_r60_1	E1A_r60_1	5327.82	351.333	8.380413e+000	8.342157e+000	89	49	9.782719e+000	0	0	0	0	0	0	-10.1405	0	0	42.5954	49.8889
DATA	2025	24	70	0	0	A_64_P165441	NM_001109059	5353.39	351.058	2.808107e+001	8.834265e+000	126	47	4.519218e+000	0	0	0	0	0	0	23.0941	1	0	46.5243	46.44
DATA	2026	24	71	0	0	A_44_P1034910	NM_201562	5378.7	350.9	2.969909e+003	2.971099e+002	2535	44	6.908387e+000	0	0	0	0	0	0	2433.21	1	1	47.2035	42.875
DATA	2027	24	72	0	0	A_42_P631818	NM_030854	5404.09	351.328	6.270081e+003	6.270648e+002	5037	47.5	1.287294e+001	0	0	0	0	0	0	5119.05	1	1	45.1352	49.2632
DATA	2028	24	73	0	0	A_64_P095620	ENSRNOT00000031258	5429.63	351.065	2.940211e+001	8.962485e+000	122	48	1.090822e+001	0	0	0	0	0	0	23.9224	1	0	44.0646	49.5484
DATA	2029	24	74	0	0	A_42_P726573	NM_053838	5454.63	350.676	1.508343e+003	1.510733e+002	1317	48	1.103526e+001	0	0	0	0	0	0	1223.36	1	1	48.2044	46.5909
DATA	2030	24	75	0	0	A_64_P029142	NM_001107866	5480	350.545	9.070516e+001	1.244310e+001	172	50.5	1.099969e+001	0	0	0	0	0	0	73.3539	1	1	55.8519	50.2
DATA	2031	24	76	0	0	A_43_P22902	NM_001106874	5506.38	350.618	8.580264e+000	8.541096e+000	87	45	8.340030e+000	0	0	0	0	0	0	-13.5223	0	0	49.5074	45.4878
DATA	2032	24	77	0	0	A_42_P619008	NM_001013079	5530.96	351.055	6.362917e+003	6.363493e+002	5103	45	1.060503e+001	0	0	0	0	0	0	5120.64	1	1	46.8651	46.2813
DATA	2033	24	78	0	0	A_64_P054421	A_64_P054421	5556.42	350.573	8.617613e+000	8.578999e+000	101	46	1.016953e+001	0	0	0	0	0	0	0.895467	0	0	65	48
DATA	2034	24	79	0	0	A_42_P627330	NM_001106628	5581.58	350.573	8.065539e+002	8.111187e+001	738	46	1.019927e+001	0	0	0	0	0	0	646.556	1	1	57.5363	46.8929
DATA	2035	24	80	0	0	A_64_P049613	A_64_P049613	5607.2	350.836	1.523671e+001	8.739123e+000	110.5	45	1.464126e+001	0	0	0	0	0	0	12.1971	1	0	44.7812	46.5405
DATA	2036	24	81	0	0	A_42_P708614	NM_001130505	5632.83	350.798	6.020123e+004	6.020129e+003	47548	45	1.053110e+001	0	0	0	1	0	0	48137.3	1	1	51.7088	46.6944
DATA	2037	24	82	0	0	A_42_P660068	NM_031350	5657.94	351.234	3.063023e+003	3.064236e+002	2409.5	48	1.050146e+001	0	0	0	0	0	0	2447.59	1	1	45.4864	47.8857
DATA	2038	24	83	66	1	DarkCorner	DarkCorner	5683.76	351.222	8.663712e+000	8.624163e+000	79	46.5	1.084200e+001	0	0	0	0	0	0	-17.3607	0	0	40.6843	47.375
DATA	2039	24	84	66	1	DarkCorner	DarkCorner	5708.91	351.679	8.663087e+000	8.623541e+000	82	43	9.077662e+000	0	0	0	0	0	0	-17.6145	0	0	41.0736	45.2414
DATA	2040	24	85	66	1	DarkCorner	DarkCorner	5734	350.545	8.661906e+000	8.622365e+000	82	41	8.977358e+000	0	0	0	0	0	0	-15.5042	0	0	55.8519	40.672
DATA	2041	25	1	66	1	DarkCorner	DarkCorner	3588	357	7.590068e+000	7.555420e+000	90	43	9.270385e+000	0	0	0	0	0	0	-13.943	0	0	54.9904	43.0078
DATA	2042	25	2	66	1	DarkCorner	DarkCorner	3614.21	357.625	7.526005e+000	7.491649e+000	76	52	1.353348e+001	0	0	0	0	0	0	-25.0441	0	0	39.4933	49.814
DATA	2043	25	3	0	0	A_64_P106975	A_64_P106975	3639.19	357.373	2.186628e+002	2.309597e+001	298	47	1.219211e+001	0	0	0	0	0	0	202.573	1	1	45.835	49.0488
DATA	2044	25	4	0	0	A_42_P799702	NM_145093	3664.54	357.377	3.600914e+002	3.675807e+001	425.5	43.5	8.393279e+000	0	0	0	0	0	0	336.011	1	1	46.8651	44.0333
DATA	2045	25	5	0	0	A_42_P704429	NM_053428	3689.86	357.211	3.690622e+004	3.690629e+003	33311	48.5	8.597406e+000	0	0	0	0	0	0	34671.6	1	1	47.2035	52.3462
DATA	2046	25	6	0	0	A_64_P129730	NM_001033896	3715.09	357.065	1.530511e+002	1.695103e+001	249	48	1.034033e+001	0	0	0	0	0	0	144.695	1	1	54.4085	47.8788
DATA	2047	25	7	0	0	A_64_P156308	NM_001008284	3740.46	357.351	9.814592e+002	9.841280e+001	1018	49	1.163906e+001	0	0	0	0	0	0	933.454	1	1	48.2044	48.697
DATA	2048	25	8	0	0	A_44_P152029	A_44_P152029	3765.61	357.069	7.236479e+000	7.229179e+000	108.5	49.5	1.309049e+001	0	0	0	0	0	0	5.82793	0	0	53.8203	50.4667
DATA	2049	25	9	0	0	A_42_P751152	NM_001106360	3791.5	357	6.328069e+004	6.328073e+003	60337	51	1.176984e+001	0	0	0	0	0	0	60831.7	1	1	54.1152	53.8947
DATA	2050	25	10	0	0	A_64_P010494	NM_001001421	3816.87	357.355	9.240241e+001	1.167236e+001	192	51.5	1.246531e+001	0	0	0	0	0	0	89.2515	1	1	44.4243	50.475
DATA	2051	25	11	0	0	A_64_P054606	NM_001107279	3842.21	357.23	3.232974e+002	3.310042e+001	412.5	49	1.065284e+001	0	0	0	0	0	0	313.621	1	1	45.1352	51.2368
DATA	2052	25	12	0	0	A_44_P335679	NM_001108168	3867.5	357.352	1.346191e+001	7.200127e+000	113	48	7.848639e+000	0	0	0	0	0	0	13.1106	1	0	57.5363	47.7037
DATA	2053	25	13	0	0	A_64_P128766	NM_001034912	3892.58	357.427	1.069392e+002	1.280773e+001	208	50	8.988574e+000	0	0	0	0	0	0	104.517	1	1	65	51.6087
DATA	2054	25	14	0	0	A_42_P595591	NM_031011	3918.31	357.662	2.564606e+004	2.564616e+003	24841.5	48	7.474258e+000	0	0	0	0	0	0	25146.8	1	1	48.5334	49.3103
DATA	2055	25	15	0	0	A_44_P962846	ENSRNOT00000058887	3943.69	357.676	5.235247e+002	5.281912e+001	604	49	9.075345e+000	0	0	0	0	0	0	514.777	1	1	48.2044	48.3438
DATA	2056	25	16	0	0	A_64_P111878	XR_005569	3968.89	357.83	1.985639e+003	1.986868e+002	2191	45.5	8.281287e+000	0	0	0	0	0	0	1957.24	1	1	40.6843	46.1667
DATA	2057	25	17	0	0	A_64_P149225	NM_001100833	3994.5	357.352	1.130426e+005	1.130426e+004	111787	52	1.041345e+001	0	0	0	0	0	0	111655	1	1	57.5363	49.24
DATA	2058	25	18	0	0	A_64_P032361	ENSRNOT00000061428	4019.58	357.427	1.244430e+003	1.246376e+002	1289	50.5	9.048590e+000	0	0	0	0	0	0	1231.28	1	1	57.5363	50.8929
DATA	2059	25	19	0	0	A_64_P038843	A_64_P038843	4045.42	357.427	1.396317e+001	7.091094e+000	109	49	6.850304e+000	0	0	0	0	0	0	13.8352	1	0	65	47.52
DATA	2060	25	20	1028	1	(+)E1A_r60_a97	E1A_r60_a97	4070.58	357.427	6.976830e+000	6.944981e+000	98	48	1.226447e+001	0	0	0	0	0	0	-0.810983	0	0	57.5363	49.3529
DATA	2061	25	21	0	0	A_42_P586883	NM_001106416	4096	357.455	6.411348e+001	9.448149e+000	159	48	8.964476e+000	0	0	0	0	0	0	63.6393	1	1	55.8519	48.8519
DATA	2062	25	22	0	0	A_42_P626023	NM_001107265	4121.42	357.427	1.028010e+003	1.030348e+002	1104.5	53	1.542875e+001	0	0	0	0	0	0	1020.82	1	1	57.5363	56.25
DATA	2063	25	23	0	0	A_64_P304646	ENSRNOT00000046873	4146.58	357.427	6.113815e+001	9.246249e+000	163	48	9.433981e+000	0	0	0	0	0	0	60.7161	1	1	57.5363	47.6667
DATA	2064	25	24	0	0	A_42_P540711	NM_133568	4172.44	357.973	2.536190e+004	2.536200e+003	24738	52	1.089128e+001	0	0	0	0	0	0	25182.8	1	1	48.5334	53.3438
DATA	2065	25	25	0	0	A_64_P079149	XM_001063529	4197.66	357.677	2.730628e+002	2.817473e+001	373	50.5	8.066194e+000	0	0	0	0	0	0	270.987	1	1	45.835	51.2778
DATA	2066	25	26	0	0	A_42_P507072	FQ213070	4222.83	357.522	5.659176e+003	5.659602e+002	5658	48	6.438794e+000	0	0	0	0	0	0	5611.57	1	1	47.2035	48.4839
DATA	2067	25	27	0	0	A_44_P314270	ENSRNOT00000015469	4248.42	357.427	1.894718e+002	2.018325e+001	288.5	45	1.089846e+001	0	0	0	0	0	0	187.67	1	1	57.5363	46.9643
DATA	2068	25	28	0	0	A_64_P026098	ENSRNOT00000027092	4273.92	357.855	9.990690e+001	1.217827e+001	206	49	7.532011e+000	0	0	0	0	0	0	98.8257	1	1	45.1352	49.7419
DATA	2069	25	29	0	0	A_64_P018599	XM_229548	4299.1	357.617	7.007388e+000	6.975400e+000	87	50	1.006769e+001	0	0	0	0	0	0	-12.4531	0	0	43.3362	52.025
DATA	2070	25	30	0	0	A_43_P15907	NM_001134567	4324.7	358	5.944507e+001	9.174705e+000	160	49	1.018055e+001	0	0	0	0	0	0	58.5957	1	1	46.1809	48.6571
DATA	2071	25	31	0	0	A_64_P151804	A_64_P151804	4349.78	358.233	5.296922e+001	8.780656e+000	148	43	8.754409e+000	0	0	0	0	0	0	52.1034	1	1	43.7019	44.3077
DATA	2072	25	32	0	0	A_42_P642743	NM_017005	4375.38	358	1.545942e+004	1.545958e+003	15010	43	8.261599e+000	0	0	0	0	0	0	15169.9	1	1	48.5334	45.5588
DATA	2073	25	33	0	0	A_42_P630463	NM_022238	4400.82	357.606	3.435077e+002	3.506451e+001	447.5	44.5	1.188639e+001	0	0	0	0	0	0	336.176	1	1	45.835	46.4375
DATA	2074	25	34	0	0	A_64_P119533	NM_001000351	4426.32	357.924	1.459202e+001	7.207918e+000	116	49	1.064117e+001	0	0	0	0	0	0	14.2404	1	0	45.835	48.0882
DATA	2075	25	35	0	0	A_64_P158068	FQ219182	4451.61	357.729	4.835225e+003	4.835743e+002	4725	53	9.685783e+000	0	0	0	0	0	0	4704.25	1	1	47.5395	54.7576
DATA	2076	25	36	0	0	A_64_P000779	XM_225838	4477.05	357.492	3.111913e+001	7.755467e+000	132	50	9.019060e+000	0	0	0	0	0	0	30.1765	1	0	43.7019	49.5556
DATA	2077	25	37	0	0	A_44_P630082	ENSRNOT00000020640	4502.49	358.159	1.690604e+002	1.834723e+001	263.5	45	7.989010e+000	0	0	0	0	0	0	163.385	1	1	43.7019	46.2083
DATA	2078	25	38	0	0	A_42_P717654	XM_001063683	4527.66	357.878	5.531940e+003	5.532402e+002	5255	53	1.460171e+001	0	0	0	0	0	0	5326.73	1	1	48.8603	52.72
DATA	2079	25	39	0	0	A_42_P792382	NM_017257	4553.37	358.265	1.020717e+004	1.020742e+003	9909	57	1.071507e+001	0	0	0	0	0	0	9790.98	1	1	46.5243	54.7931
DATA	2080	25	40	0	0	A_64_P075035	NM_001001014	4578.5	357.5	1.032459e+002	1.259321e+001	212	56	1.115600e+001	0	0	0	0	0	0	98.6358	1	1	57.5363	54.2941
DATA	2081	25	41	0	0	A_64_P021281	NM_001039022	4603.89	357.5	6.494713e+003	6.495116e+002	6212	52	9.920894e+000	0	0	0	0	0	0	6178.97	1	1	56.9804	53.7
DATA	2082	25	42	0	0	A_44_P729533	TC581820	4629.74	357.736	1.000449e+004	1.000475e+003	9460.5	57	1.151456e+001	0	0	0	0	0	0	9476.76	1	1	47.5395	55.6957
DATA	2083	25	43	0	0	A_42_P802358	NM_001024341	4654.6	357.849	1.883389e+004	1.883404e+003	17135	54	1.098140e+001	0	0	0	0	0	0	17763.2	1	1	48.5334	53.6552
DATA	2084	25	44	0	0	A_42_P481087	XM_232226	4680.11	357.5	1.288447e+003	1.290535e+002	1281	52	9.975348e+000	0	0	0	0	0	0	1209.57	1	1	56.9804	50.1515
DATA	2085	25	45	0	0	A_42_P561597	NM_001106486	4705.63	358.265	1.107971e+004	1.107996e+003	10361	50	1.175657e+001	0	0	0	0	0	0	10353.5	1	1	46.5243	51.0714
DATA	2086	25	46	0	0	A_64_P113381	A_64_P113381	4730.67	357.5	1.209407e+001	7.505611e+000	113.5	51	1.219964e+001	0	0	0	0	0	0	11.2468	1	0	57.5363	51.4359
DATA	2087	25	47	0	0	A_64_P088695	NM_001134414	4756.42	357.878	1.718532e+003	1.720144e+002	1603	47.5	7.544577e+000	0	0	0	0	0	0	1590.29	1	1	48.5334	48.5714
DATA	2088	25	48	0	0	A_44_P728586	ENSRNOT00000013367	4781.91	358.328	1.095318e+003	1.097870e+002	1109	50	1.144399e+001	0	0	0	0	0	0	1008.57	1	1	45.1352	50.3333
DATA	2089	25	49	0	0	A_42_P544898	NM_001108279	4807.11	357.5	6.068196e+001	9.662733e+000	155.5	46.5	1.249560e+001	0	0	0	0	0	0	55.5891	1	1	56.9804	47.7353
DATA	2090	25	50	0	0	A_44_P432910	NM_012814	4832.42	357.573	1.379947e+005	1.379948e+004	125381	46.5	1.463483e+001	0	0	0	0	0	0	125769	1	1	57.5363	47.9412
DATA	2091	25	51	0	0	A_64_P157820	XM_001079095	4857.99	357.985	8.120444e+001	1.112035e+001	180	48	6.650173e+000	0	0	0	0	0	0	73.628	1	1	46.8651	49.0313
DATA	2092	25	52	0	0	A_42_P601802	NM_134465	4883.8	357.818	3.678009e+003	3.678802e+002	3319	45	7.761140e+000	0	0	0	0	0	0	3317.04	1	1	52.9257	46
DATA	2093	25	53	0	0	A_64_P039737	NM_001130508	4908.91	358.328	2.133679e+003	2.135060e+002	1997.5	48	9.683893e+000	0	0	0	0	0	0	1914.41	1	1	45.1352	48.7778
DATA	2094	25	54	0	0	A_42_P648800	AA998304	4934	357.545	4.669172e+002	4.732544e+001	521	45	9.499935e+000	0	0	0	0	0	0	416.694	1	1	55.8519	46.0345
DATA	2095	25	55	0	0	A_64_P007009	ENSRNOT00000014567	4959.93	358.418	2.147206e+003	2.148607e+002	2026.5	52	8.972572e+000	0	0	0	0	0	0	1906.14	1	1	45.835	50.5938
DATA	2096	25	56	0	0	A_64_P049527	TC606896	4984.58	357.573	2.076688e+002	2.218373e+001	283	48	9.027636e+000	0	0	0	0	0	0	183.381	1	1	57.5363	46.6765
DATA	2097	25	57	0	0	A_44_P281595	NM_001037556	5010.63	357.9	5.748293e+001	9.724026e+000	151	49	1.071647e+001	0	0	0	0	0	0	50.4872	1	1	47.2035	49.303
DATA	2098	25	58	0	0	A_44_P374638	NM_024391	5035.92	358.288	3.764002e+001	8.736368e+000	136	46.5	8.686692e+000	0	0	0	0	0	0	32.8879	1	0	45.835	46.3
DATA	2100	25	60	0	0	A_64_P046416	A_64_P046416	5086.42	357.573	7.237530e+001	1.076375e+001	164	46	9.324130e+000	0	0	0	0	0	0	62.5768	1	1	57.5363	46.4242
DATA	2101	25	61	0	0	A_44_P428560	NM_001001358	5111.58	357.573	4.057754e+001	8.977317e+000	138	45	9.463177e+000	0	0	0	0	0	0	34.9056	1	1	57.5363	45.1379
DATA	2102	25	62	0	0	A_44_P208887	NM_001105774	5137.42	357.573	6.486522e+001	1.033766e+001	160	43	7.056144e+000	0	0	0	0	0	0	55.511	1	1	65	42.5926
DATA	2103	25	63	0	0	A_42_P533792	NM_001106575	5162.51	358.261	1.276931e+004	1.276957e+003	10776	46	1.050858e+001	0	0	0	0	0	0	10875.4	1	1	47.2035	44.7407
DATA	2104	25	64	0	0	A_42_P802550	NM_017365	5188.26	358.375	5.769157e+002	5.826136e+001	594	47	9.130274e+000	0	0	0	1	0	0	488.927	1	1	47.5395	46.8438
DATA	2105	25	65	0	0	A_42_P545129	ENSRNOT00000007554	5213.63	358.265	9.450322e+002	9.485549e+001	879	48	1.114267e+001	0	0	0	0	0	0	797.063	1	1	46.5243	47.3226
DATA	2106	25	66	0	0	A_42_P500675	NM_013179	5239.43	358.239	4.744418e+002	4.814865e+001	500	47	8.590129e+000	0	0	0	0	0	0	398.261	1	1	46.5243	46.625
DATA	2107	25	67	0	0	A_44_P127238	NM_001127655	5264.5	358.257	1.109718e+003	1.112776e+002	1016	46	9.053613e+000	0	0	0	0	0	0	927.377	1	1	47.2035	46.8235
DATA	2108	25	68	0	0	A_64_P042142	ENSRNOT00000027371	5289.88	358.182	8.715934e+001	1.202144e+001	174.5	48	1.025086e+001	0	0	0	0	0	0	72.5181	1	1	45.835	46.5714
DATA	2109	25	69	0	0	A_44_P279756	NM_022848	5315.43	358.2	8.352761e+000	8.314632e+000	93.5	47	1.212034e+001	0	0	0	0	0	0	-3.94803	0	0	42.9674	48.2571
DATA	2110	25	70	0	0	A_64_P119597	NM_001106871	5340.9	358.343	8.386577e+000	8.348293e+000	97.5	47	5.374155e+000	0	0	0	0	0	0	-3.3585	0	0	45.835	45.8077
DATA	2111	25	71	0	0	A_44_P790674	NM_001191933	5366.17	358	2.454606e+001	8.733134e+000	119	45	6.018984e+000	0	0	0	0	0	0	20.1749	1	0	46.8651	43.1176
DATA	2112	25	72	0	0	A_44_P405618	ENSRNOT00000025426	5390.99	358.118	3.295128e+002	3.400784e+001	373	43.5	9.262767e+000	0	0	0	0	0	0	269.868	1	1	46.8651	43.1667
DATA	2113	25	73	0	0	A_42_P719478	NM_001191779	5416.5	358	1.795426e+001	8.629441e+000	114	45	9.279239e+000	0	0	0	0	0	0	14.6529	1	0	54.1152	45.6765
DATA	2114	25	74	0	0	A_64_P061424	A_64_P061424	5442.46	358.2	1.778660e+001	8.653036e+000	111	46.5	1.112970e+001	0	0	0	0	0	0	14.4686	1	0	47.5395	46.8182
DATA	2115	25	75	0	0	A_44_P1042876	NM_212504	5467.38	358	5.433834e+003	5.434497e+002	4282	50	1.248693e+001	0	0	0	0	0	0	4407.03	1	1	48.5334	50.44
DATA	2116	25	76	0	0	A_44_P470043	NM_001108103	5492.5	358	1.447920e+002	1.679825e+001	219.5	46	9.651277e+000	0	0	0	0	0	0	117.112	1	1	54.1152	46.7297
DATA	2117	25	77	0	0	A_64_P108484	ENSRNOT00000046584	5518.62	358.029	3.719399e+001	9.313356e+000	130	42	6.006584e+000	0	0	0	0	0	0	30.0071	1	0	46.1809	42.5217
DATA	2118	25	78	0	0	A_42_P666065	NM_001014069	5543.75	358.153	5.876671e+002	5.938641e+001	565	44	1.120898e+001	0	0	0	0	0	0	473.095	1	1	47.8731	46.8125
DATA	2119	25	79	0	0	A_64_P136571	NM_001134545	5569.29	358.106	6.320372e+001	1.065122e+001	149	44	9.198567e+000	0	0	0	0	0	0	50.7836	1	1	45.835	46.3636
DATA	2120	25	80	0	0	A_42_P816740	NM_001108705	5594.6	358.353	4.124690e+002	4.213116e+001	425	46.5	1.222232e+001	0	0	0	0	0	0	330.905	1	1	46.8651	47.8333
DATA	2121	25	81	0	0	A_64_P018142	NM_001100716	5620.23	358.087	2.046480e+002	2.219760e+001	258.5	42	1.146545e+001	0	0	0	0	0	0	163.96	1	1	46.5243	43.3514
DATA	2122	25	82	0	0	A_42_P779687	ENSRNOT00000034449	5645.41	358.092	1.474629e+004	1.474654e+003	11295.5	52.5	1.026269e+001	0	0	0	0	0	0	11803.6	1	1	49.1849	51.2857
DATA	2124	25	84	66	1	DarkCorner	DarkCorner	5695.91	358.065	8.652327e+000	8.612830e+000	75	43	9.677312e+000	0	0	0	0	0	0	-20.0791	0	0	54.4085	44.5417
DATA	2125	25	85	66	1	DarkCorner	DarkCorner	5721.5	358	8.650996e+000	8.611505e+000	79	43	9.231976e+000	0	0	0	0	0	0	-15.4475	0	0	65	45.119
DATA	2126	26	1	66	1	DarkCorner	DarkCorner	3600.58	364.427	7.549463e+000	7.515000e+000	88.5	46	1.019070e+001	0	0	0	0	0	0	-12.9356	0	0	57.5363	46.9388
DATA	2127	26	2	66	1	DarkCorner	DarkCorner	3626.51	364.672	7.488901e+000	7.454715e+000	81	48	1.394934e+001	0	0	0	0	0	0	-18.2058	0	0	46.5243	48.8378
DATA	2128	26	3	0	0	A_42_P713844	NM_001106167	3651.84	365.203	1.065843e+003	1.068409e+002	1062	47	9.492621e+000	0	0	0	0	0	0	992.289	1	1	45.4864	48.8788
DATA	2129	26	4	0	0	A_42_P627219	NM_001012468	3677.37	364.957	1.394042e+004	1.394061e+003	12779	48	8.688236e+000	0	0	0	0	0	0	13069.2	1	1	46.8651	50.8214
DATA	2130	26	5	0	0	A_42_P461003	NM_001044283	3702.51	365.186	1.508778e+004	1.508796e+003	13997	49	8.855713e+000	0	0	0	0	0	0	14237.3	1	1	47.2035	51.069
DATA	2131	26	6	0	0	A_44_P1019923	NM_022522	3728.16	365.179	3.255974e+003	3.256782e+002	3127	47	1.122523e+001	0	0	0	0	0	0	3091.51	1	1	46.1809	46.1667
DATA	2132	26	7	0	0	A_42_P814056	NM_001108866	3753.5	365	1.183129e+004	1.183151e+003	11049	52	1.328749e+001	0	0	0	0	0	0	11297.6	1	1	48.5334	49.1667
DATA	2133	26	8	0	0	A_42_P795269	NM_001134730	3778.87	365.21	1.153321e+004	1.153343e+003	11352	53	1.256748e+001	0	0	0	0	0	0	11071.8	1	1	44.7812	55.0541
DATA	2134	26	9	0	0	A_42_P763522	NM_001013980	3803.89	364.5	3.457502e+003	3.458239e+002	3338.5	52.5	1.383792e+001	0	0	0	0	0	0	3334.92	1	1	56.9804	53.1579
DATA	2135	26	10	0	0	A_44_P292437	NM_153309	3829.45	364.938	3.026562e+002	3.108933e+001	396	51	1.270244e+001	0	0	0	0	0	0	293.27	1	1	44.7812	51.2647
DATA	2136	26	11	0	0	A_64_P065313	ENSRNOT00000042070	3854.97	365.031	1.082811e+002	1.293712e+001	208	49	1.107342e+001	0	0	0	0	0	0	105.359	1	1	46.8651	52
DATA	2137	26	12	0	0	A_64_P008047	NM_001033670	3880.33	364.5	3.647225e+004	3.647232e+003	34939	50	8.608947e+000	0	0	0	0	0	0	35618	1	1	57.5363	50.037
DATA	2138	26	13	0	0	A_64_P080612	TC638889	3905.72	365.016	6.091502e+003	6.091907e+002	6183.5	50	1.004142e+001	0	0	0	0	0	0	5969.15	1	1	44.7812	51.5172
DATA	2139	26	14	0	0	A_43_P17696	NM_001004257	3930.85	365.182	3.617019e+003	3.617698e+002	3586.5	48.5	1.006582e+001	0	0	0	0	0	0	3554.9	1	1	46.1809	49.3
DATA	2140	26	15	0	0	A_64_P019608	NM_001105713	3956.43	365.29	9.171877e+002	9.198478e+001	990	48	9.030972e+000	0	0	0	0	0	0	903.823	1	1	46.8651	48.0385
DATA	2141	26	16	0	0	A_64_P108575	ENSRNOT00000046600	3981.46	364.923	3.716771e+001	7.903670e+000	139	46.5	8.838813e+000	0	0	0	0	0	0	36.706	1	1	41.0736	47.7308
DATA	2142	26	17	0	0	A_64_P136859	NM_001109642	4007.11	364.5	6.843705e+003	6.844059e+002	6798	52	9.388623e+000	0	0	0	0	0	0	6771.36	1	1	56.9804	50.7097
DATA	2143	26	18	0	0	A_64_P021597	A_64_P021597	4032.64	364.727	6.982985e+000	6.951108e+000	93	50	8.435823e+000	0	0	0	0	0	0	-6.81276	0	0	37.4241	48.4412
DATA	2144	26	19	0	0	A_64_P148032	A_64_P148032	4057.89	364.5	9.271435e+001	1.158288e+001	200.5	47.5	1.098301e+001	0	0	0	0	0	0	91.989	1	1	65	49.8333
DATA	2145	26	20	0	0	A_42_P743580	NM_017214	4083.5	365.273	4.325436e+003	4.325993e+002	4479.5	48	1.003328e+001	0	0	0	0	0	0	4295.79	1	1	46.5243	48.2
DATA	2146	26	21	0	0	A_42_P693964	NM_181087	4108.67	365.391	2.635194e+003	2.636105e+002	2606.5	47	1.031795e+001	0	0	0	0	0	0	2618.62	1	1	46.5243	47.28
DATA	2147	26	22	0	0	A_44_P1058389	NM_012992	4134.41	365.31	2.083436e+004	2.083447e+003	20441	53	1.339537e+001	0	0	0	0	0	0	20708.2	1	1	47.5395	57.3103
DATA	2148	26	23	0	0	A_44_P135224	NM_022187	4159.5	364.5	1.223349e+002	1.406078e+001	228.5	48.5	1.231290e+001	0	0	0	0	0	0	121.575	1	1	57.5363	49.5263
DATA	2149	26	24	0	0	A_64_P070249	ENSRNOT00000048236	4184.67	364.5	6.819928e+002	6.855089e+001	771.5	52	8.910668e+000	0	0	0	0	0	0	677.511	1	1	65	52.2
DATA	2150	26	25	0	0	A_42_P806899	NM_001108829	4210.42	364.573	6.135594e+001	9.262371e+000	166	45	8.164617e+000	0	0	0	0	0	0	60.9124	1	1	57.5363	46.2593
DATA	2151	26	26	0	0	A_42_P465144	NM_001107714	4235.58	364.573	1.722767e+002	1.857496e+001	272.5	44	9.116704e+000	0	0	0	0	0	0	170.871	1	1	57.5363	44.1667
DATA	2152	26	27	0	0	A_43_P19712	NM_001106751	4261	364.545	6.985693e+000	6.974140e+000	104.5	46.5	1.045091e+001	0	0	0	0	0	0	5.27212	0	0	55.8519	48.75
DATA	2153	26	28	0	0	A_42_P728472	NM_001007600	4286.57	365.299	9.340752e+003	9.341012e+002	8907	49	7.657862e+000	0	0	0	0	0	0	9239.95	1	1	46.1809	48
DATA	2154	26	29	66	-1	(-)3xSLv1	NegativeControl	4312.67	365.178	7.008437e+000	6.976444e+000	88	48	1.073996e+001	0	0	0	0	0	0	-11.9248	0	0	37.4241	49.9545
DATA	2155	26	30	0	0	A_42_P629394	NM_031683	4337.39	365.571	3.133403e+003	3.134183e+002	3080	47.5	8.051011e+000	0	0	0	0	0	0	3088	1	1	46.5243	45.8214
DATA	2156	26	31	0	0	A_64_P041977	A_64_P041977	4362.58	364.573	5.779423e+001	9.082399e+000	157.5	44	8.735078e+000	0	0	0	0	0	0	56.8231	1	1	57.5363	44.3889
DATA	2157	26	32	0	0	A_44_P126406	XM_228958	4388.23	365.359	9.140951e+003	9.141221e+002	9261	51	1.103970e+001	0	0	0	0	0	0	8965.51	1	1	44.7812	50
DATA	2158	26	33	0	0	A_64_P021878	NM_001167664	4413.96	365.388	4.317707e+001	8.260928e+000	147	47	1.007368e+001	0	0	0	0	0	0	42.2318	1	1	45.4864	45.8571
DATA	2159	26	34	0	0	A_64_P058719	NM_001014175	4439	365.226	9.266436e+003	9.266705e+002	9082	50	7.114275e+000	0	0	0	0	0	0	9037.13	1	1	45.4864	49.7097
DATA	2160	26	35	0	0	A_42_P495579	NM_001107564	4464.12	365.044	1.097400e+003	1.099685e+002	1162.5	52	9.010200e+000	0	0	0	0	0	0	1066.89	1	1	46.8651	52.6061
DATA	2161	26	36	0	0	A_64_P054979	NM_001109615	4490.46	365.381	6.492151e+001	9.628077e+000	162	49.5	8.943357e+000	0	0	0	0	0	0	62.8998	1	1	44.7812	49.4474
DATA	2162	26	37	0	0	A_44_P713838	ENSRNOT00000032874	4515.09	364.614	1.421320e+002	1.590362e+001	240.5	47	1.129117e+001	0	0	0	0	0	0	137.22	1	1	57.259	49.7619
DATA	2163	26	38	0	0	A_64_P158913	NM_001108101	4540.5	364.648	7.194622e+000	7.190429e+000	106.5	47	1.221647e+001	0	0	0	0	0	0	6.16776	0	0	65	50.3704
DATA	2164	26	39	0	0	A_43_P13018	NM_054004	4566	365.424	2.051313e+004	2.051326e+003	19388	52	9.696801e+000	0	0	0	0	0	0	19655.3	1	1	45.4864	51.8065
DATA	2165	26	40	0	0	A_64_P114383	A_64_P114383	4591.75	365.195	1.989906e+004	1.989919e+003	18926	55	9.618531e+000	0	0	0	0	0	0	18987.9	1	1	50.7771	56.25
DATA	2166	26	41	0	0	A_43_P16629	XM_001080634	4616.84	365.088	9.258978e+003	9.259262e+002	8656.5	53	1.096997e+001	0	0	0	0	0	0	8798.14	1	1	46.5243	54.9333
DATA	2167	26	42	0	0	A_42_P810313	NM_001108677	4642	365	1.171209e+002	1.379073e+001	207.5	55	1.310254e+001	0	0	0	0	0	0	110.81	1	1	54.9904	54.48
DATA	2168	26	43	0	0	A_42_P537516	NM_001106023	4667.72	365.118	1.629757e+004	1.629773e+003	15208.5	50	9.867863e+000	0	0	0	0	0	0	15349.6	1	1	48.8603	49.9333
DATA	2169	26	44	0	0	A_64_P006964	A_64_P006964	4693.19	365.483	1.603988e+002	1.764272e+001	257	49.5	9.743610e+000	0	0	0	0	0	0	150.377	1	1	42.9674	48.6
DATA	2170	26	45	0	0	A_42_P829251	NM_133381	4718.5	365	1.426652e+001	7.519487e+000	112	51	1.382336e+001	0	0	0	0	0	0	13.3113	1	0	54.1152	53.9091
DATA	2171	26	46	0	0	A_42_P687443	NM_020100	4743.91	365.403	1.188451e+002	1.400977e+001	212.5	51	1.079609e+001	0	0	0	0	0	0	110.358	1	1	45.835	50.3421
DATA	2172	26	47	0	0	A_44_P196146	NM_031349	4769	365	1.192462e+002	1.406322e+001	212.5	50	1.001805e+001	0	0	0	0	0	0	110.185	1	1	54.9904	50.7368
DATA	2173	26	48	0	0	A_64_P050137	ENSRNOT00000058586	4794.6	365.357	1.985873e+002	2.122513e+001	280	47	1.294401e+001	0	0	0	0	0	0	182.581	1	1	47.2035	50.1212
DATA	2174	26	49	0	0	A_44_P637827	NM_001108797	4819.79	365.194	4.767535e+003	4.768129e+002	4295	45	1.350128e+001	0	0	0	0	0	0	4361.09	1	1	47.5395	47.65
DATA	2175	26	50	0	0	A_64_P070073	NM_001109590	4845.5	365	1.218602e+002	1.434596e+001	211	51	1.007335e+001	0	0	0	0	0	0	110.888	1	1	54.1152	48.1
DATA	2176	26	51	0	0	A_64_P130572	NM_001109400	4870.73	365.225	2.138857e+003	2.140210e+002	2022	48	6.001894e+000	0	0	0	0	0	0	1936.31	1	1	47.2035	47.9091
DATA	2177	26	52	0	0	A_42_P658815	NM_198745	4896.03	365.219	1.534647e+003	1.536552e+002	1495	49	7.999355e+000	0	0	0	0	0	0	1382.08	1	1	45.4864	48.6944
DATA	2179	26	54	0	0	A_43_P14809	TC581403	4947	365.403	2.162847e+003	2.164228e+002	2015	44.5	1.020789e+001	0	0	0	0	0	0	1927.34	1	1	45.4864	47.1429
DATA	2180	26	55	0	0	A_42_P553319	TC597248	4972.11	365.375	1.118366e+002	1.361843e+001	203	48	7.315315e+000	0	0	0	0	0	0	99.1378	1	1	45.1352	47.1739
DATA	2181	26	56	0	0	A_64_P004162	NM_019139	4997.5	365	7.848466e+000	7.812638e+000	89.5	49	9.903952e+000	0	0	0	0	0	0	-8.53048	0	0	54.1152	49.9048
DATA	2182	26	57	0	0	A_64_P032450	NM_172330	5023.29	365.246	2.058970e+002	2.203692e+001	279	52	1.018889e+001	0	0	0	0	0	0	180.581	1	1	45.1352	50.0357
DATA	2183	26	58	0	0	A_44_P470976	NM_001013133	5048.64	365.261	2.974852e+001	8.437363e+000	126	45	1.001451e+001	0	0	0	0	0	0	25.9545	1	0	46.8651	47.9032
DATA	2184	26	59	0	0	A_64_P166428	NM_001037205	5073.97	365.375	1.363564e+002	1.577715e+001	225	47	8.959423e+000	0	0	0	0	0	0	118.352	1	1	45.1352	47.6923
DATA	2185	26	60	0	0	A_43_P11576	NM_012821	5099.09	365.386	1.198166e+001	8.066541e+000	114	45	8.166330e+000	0	0	0	0	0	0	10.3467	1	0	65	45.9118
DATA	2186	26	61	0	0	A_64_P156910	A_64_P156910	5124.5	365.352	2.128963e+002	2.274938e+001	283	45	6.215891e+000	0	0	0	0	0	0	182.91	1	1	57.5363	44.3611
DATA	2187	26	62	0	0	A_64_P126140	NM_001191648	5149.91	365.386	5.728378e+001	9.886777e+000	146.5	43	7.641463e+000	0	0	0	0	0	0	48.9694	1	1	65	42.5667
DATA	2188	26	63	0	0	A_42_P637122	NM_001108351	5175.74	365.5	4.609254e+003	4.609966e+002	3871	46	8.081634e+000	0	0	0	0	0	0	3920.63	1	1	50.4627	45.7931
DATA	2189	26	64	0	0	A_64_P081208	NM_001009712	5200.81	365.588	1.577635e+004	1.577656e+003	13203.5	48.5	1.104956e+001	0	0	0	0	0	0	13355.8	1	1	46.5243	47.7059
DATA	2190	26	65	0	0	A_42_P465608	NM_130894	5226.38	365.333	4.059683e+003	4.060506e+002	3490	49.5	9.306864e+000	0	0	0	0	0	0	3420.37	1	1	47.5395	49.1071
DATA	2191	26	66	0	0	A_42_P485589	NM_017246	5251.65	365.333	1.079903e+002	1.356766e+001	187.5	46	8.009823e+000	0	0	0	0	0	0	90.5697	1	1	48.2044	45.3125
DATA	2192	26	67	0	0	A_64_P031383	NM_020308	5277.08	365.324	5.540310e+002	5.601401e+001	562	44	8.424630e+000	0	0	0	0	0	0	462.59	1	1	47.5395	45.0244
DATA	2193	26	68	0	0	A_44_P220647	NM_001107097	5302.7	365.5	8.792200e+001	1.208128e+001	172	48	1.091544e+001	0	0	0	0	0	0	73.0957	1	1	46.5243	46.0357
DATA	2194	26	69	0	0	A_44_P294687	NM_080885	5328	365.921	3.802540e+002	3.892483e+001	413	47	7.610620e+000	0	0	0	0	0	0	314.858	1	1	45.4864	47.1923
DATA	2195	26	70	0	0	A_42_P512838	NM_001106884	5353.44	365.483	1.128805e+003	1.131891e+002	996	45	6.003078e+000	0	0	0	0	0	0	930.899	1	1	52.9257	44.5862
DATA	2196	26	71	0	0	A_42_P635228	NM_001107651	5378.82	365.662	4.967482e+001	9.745329e+000	141	45	7.142635e+000	0	0	0	0	0	0	40.8133	1	1	45.4864	43.5
DATA	2197	26	72	0	0	A_44_P254687	NM_001105728	5403.93	366.262	2.052145e+002	2.217895e+001	272.5	46	1.083308e+001	0	0	0	0	0	0	168.033	1	1	44.7812	47.0882
DATA	2198	26	73	0	0	A_64_P049628	NM_001169145	5429.32	365.382	7.149353e+003	7.149852e+002	5777	46	1.103532e+001	0	0	0	0	0	0	5833.45	1	1	46.5243	46.7241
DATA	2199	26	74	0	0	A_64_P007703	NM_031674	5454.58	365.427	8.457963e+001	1.196889e+001	166	43	8.987513e+000	0	0	0	0	0	0	68.7992	1	1	57.5363	44.8462
DATA	2200	26	75	0	0	A_42_P645376	NM_001014135	5480.39	365.423	3.676056e+004	3.676065e+003	29374.5	49.5	1.095809e+001	0	0	0	0	0	0	29814.8	1	1	47.8731	50.2813
DATA	2201	26	76	0	0	A_64_P040920	XM_577408	5506	365.5	4.481479e+003	4.482288e+002	3753	44	7.855844e+000	0	0	0	0	0	0	3625.24	1	1	44.4243	44
DATA	2202	26	77	0	0	A_42_P819656	NM_130409	5530.94	365.464	5.131226e+003	5.131935e+002	4049	41.5	7.950492e+000	0	0	0	0	0	0	4141.31	1	1	47.5395	40.6071
DATA	2203	26	78	0	0	A_64_P018921	NM_001135012	5556.37	365.64	6.212135e+002	6.270731e+001	584	44	8.937056e+000	0	0	0	0	0	0	500.357	1	1	48.8603	44.5
DATA	2204	26	79	0	0	A_43_P15253	NM_012967	5582.07	365.574	3.721209e+002	3.818567e+001	389.5	48	1.139878e+001	0	0	0	0	0	0	299.191	1	1	46.5243	48.3529
DATA	2205	26	80	0	0	A_64_P093063	NM_001136272	5607	365.5	4.620971e+002	4.699949e+001	466	42	9.297705e+000	0	0	0	0	0	0	371.005	1	1	43.7019	41.2258
DATA	2206	26	81	0	0	A_44_P477406	NM_012751	5632.77	365.969	2.486172e+002	2.630344e+001	300.5	43	1.153219e+001	0	0	0	0	0	0	199.403	1	1	45.4864	44.4839
DATA	2207	26	82	0	0	A_64_P056816	NM_001100697	5657.67	365.5	9.837535e+001	1.306398e+001	176.5	46	1.037465e+001	0	0	0	0	0	0	78.8354	1	1	57.5363	46.4333
DATA	2208	26	83	0	0	A_42_P580733	NM_001006981	5683.5	365.5	6.693557e+003	6.694110e+002	5324	44	9.191300e+000	0	0	0	0	0	0	5361.83	1	1	49.1849	44
DATA	2209	26	84	66	1	DarkCorner	DarkCorner	5708.5	365.5	8.639185e+000	8.599748e+000	78	42	7.256143e+000	0	0	0	0	0	0	-20.7227	0	0	57.5363	41.4194
DATA	2210	26	85	66	1	DarkCorner	DarkCorner	5733.89	365.5	8.636124e+000	8.596701e+000	79	42	9.132226e+000	0	0	0	0	0	0	-18.1433	0	0	56.9804	41.8644
DATA	2211	27	1	66	1	DarkCorner	DarkCorner	3588.11	371.5	7.570461e+000	7.535903e+000	90	45	9.750996e+000	0	0	0	0	0	0	-11.4407	0	0	65	45.2249
DATA	2212	27	2	66	1	DarkCorner	DarkCorner	3613.42	371.573	7.510029e+000	7.475747e+000	82	47	1.079487e+001	0	0	0	0	0	0	-20.4074	0	0	57.5363	45.1053
DATA	2213	27	3	0	0	A_44_P289922	NM_139103	3639.24	372.318	6.743062e+002	6.783735e+001	720.5	51	1.215753e+001	0	0	0	0	0	0	626.233	1	1	45.4864	52.4688
DATA	2214	27	4	0	0	A_64_P117149	ENSRNOT00000065538	3664.42	371.573	7.399629e+000	7.365850e+000	101	47.5	1.003563e+001	0	0	0	0	0	0	-1.99427	0	0	57.5363	48.9231
DATA	2215	27	5	0	0	A_42_P524308	NM_019213	3689.58	371.573	1.094534e+003	1.096977e+002	1127	48	9.001792e+000	0	0	0	0	0	0	1030.46	1	1	57.5363	50
DATA	2216	27	6	0	0	A_64_P037562	XM_001070892	3715	371.545	6.090963e+002	6.134205e+001	688.5	48	1.085011e+001	0	0	0	0	0	0	577.073	1	1	55.8519	49.2188
DATA	2217	27	7	0	0	A_44_P267706	XR_085883	3740.5	371.648	7.260952e+000	7.227820e+000	102.5	43	1.142580e+001	0	0	0	0	0	0	0.133966	0	0	65	44.125
DATA	2218	27	8	0	0	A_64_P082569	XM_001053354	3765.58	371.573	7.221790e+000	7.188823e+000	94	55.5	1.328060e+001	0	0	0	0	0	0	-6.294	0	0	57.5363	54.3214
DATA	2219	27	9	0	0	A_64_P000539	NM_053930	3791.29	372.167	1.585289e+004	1.585305e+003	15504	55.5	1.324471e+001	0	0	0	0	0	0	15270.3	1	1	45.835	55.1765
DATA	2220	27	10	0	0	A_43_P22124	NM_213625	3816.8	372.141	1.399296e+003	1.401105e+002	1422	52	1.266922e+001	0	0	0	0	0	0	1354.22	1	1	45.4864	51.8649
DATA	2221	27	11	0	0	A_44_P1012556	NM_001013988	3842.02	372.19	1.804712e+002	1.938897e+001	280	49	1.115444e+001	0	0	0	0	0	0	175.404	1	1	45.4864	50.4167
DATA	2222	27	12	0	0	A_64_P115457	NM_001106361	3867.5	371.648	9.304592e+001	1.168008e+001	196	52	9.426550e+000	0	0	0	0	0	0	90.7817	1	1	57.5363	52.2121
DATA	2223	27	13	0	0	A_64_P064229	A_64_P064229	3892.58	371.573	7.068185e+000	7.038250e+000	100	52	9.367344e+000	0	0	0	0	0	0	1.77298	0	0	57.5363	50.6667
DATA	2224	27	14	0	0	A_64_P039066	ENSRNOT00000041345	3918.42	371.573	3.492250e+001	7.834787e+000	137.5	49.5	1.046071e+001	0	0	0	0	0	0	34.3008	1	0	57.5363	50.5667
DATA	2225	27	15	0	0	A_42_P574960	ENSRNOT00000068719	3943.65	372.277	7.190558e+002	7.224487e+001	804	52	9.734997e+000	0	0	0	0	0	0	708.266	1	1	45.1352	51.4375
DATA	2226	27	16	0	0	A_42_P600215	NM_175844	3969	371.681	2.918250e+001	7.562842e+000	134	46.5	9.092994e+000	0	0	0	0	0	0	28.8121	1	0	58.0869	48.3571
DATA	2227	27	17	0	0	A_42_P607770	NM_001134616	3994.37	372.127	1.197240e+004	1.197260e+003	11378	51	9.802694e+000	0	0	0	0	0	0	11845.4	1	1	47.5395	47.9697
DATA	2228	27	18	0	0	A_64_P003348	NM_001077660	4019.79	372.044	4.714636e+002	4.765595e+001	568.5	46	1.063520e+001	0	0	0	0	0	0	467.262	1	1	46.5243	47.9737
DATA	2229	27	19	0	0	A_64_P057828	A_64_P057828	4046.08	372.039	8.442387e+002	8.470870e+001	943	50	1.054861e+001	0	0	0	0	0	0	837.901	1	1	47.8731	51.8387
DATA	2230	27	20	0	0	A_64_P081765	NM_134355	4070.78	372.246	1.493040e+001	7.092465e+000	113.5	47.5	8.842293e+000	0	0	0	0	0	0	14.8336	1	0	45.1352	48.1154
DATA	2231	27	21	0	0	A_42_P758886	NM_019258	4096	372	1.795530e+002	1.924581e+001	285.5	46	9.312357e+000	0	0	0	0	0	0	178.51	1	1	54.9904	47
DATA	2232	27	22	0	0	A_42_P745470	XM_001066818	4121.5	372.265	1.127914e+004	1.127935e+003	11142	51.5	1.146533e+001	0	0	0	0	0	0	11218.4	1	1	46.5243	50.5769
DATA	2233	27	23	0	0	A_42_P800949	NM_031787	4146.5	372	2.976977e+002	3.056471e+001	399	50	1.114779e+001	0	0	0	0	0	0	296.111	1	1	54.1152	50.7188
DATA	2234	27	24	0	0	A_42_P738559	NM_012801	4172.2	372.319	2.277711e+004	2.277722e+003	21993	50	1.040909e+001	0	0	0	0	0	0	22651.5	1	1	46.8651	50.7778
DATA	2235	27	25	0	0	A_42_P749550	NM_001109359	4197.64	372.119	4.590622e+003	4.591145e+002	4637	46	8.463171e+000	0	0	0	0	0	0	4562.84	1	1	45.835	47.8409
DATA	2236	27	26	0	0	A_64_P007493	ENSRNOT00000006658	4223.16	371.968	8.591286e+000	6.989259e+000	109	50	1.204766e+001	0	0	0	0	0	0	8.53222	1	0	45.4864	48.8286
DATA	2237	27	27	0	0	A_64_P056182	NM_053363	4248.36	372.258	4.049201e+003	4.049796e+002	3982.5	46	6.495552e+000	0	0	0	0	0	0	4017.15	1	1	46.1809	45.5946
DATA	2238	27	28	0	0	A_42_P818546	NM_001191600	4273.87	372.145	1.020626e+003	1.022992e+002	1143	49	8.481499e+000	0	0	0	0	0	0	1011.15	1	1	45.4864	48.9412
DATA	2239	27	29	0	0	A_44_P407948	XM_001055260	4299.2	372.319	8.966382e+001	1.135328e+001	185.5	48	9.961443e+000	0	0	0	0	0	0	88.6892	1	1	46.8651	49.2326
DATA	2240	27	30	66	-1	(-)3xSLv1	NegativeControl	4325.12	372.2	7.009766e+000	6.977767e+000	80	48	1.008330e+001	0	0	0	0	0	0	-17.4805	0	0	45.835	48.6111
DATA	2241	27	31	0	0	A_64_P044505	NM_031587	4350	372	3.369023e+002	3.440824e+001	442.5	43	7.546437e+000	0	0	0	0	0	0	331.894	1	1	54.9904	43.8889
DATA	2242	27	32	0	0	A_42_P685138	NM_153621	4375.6	372.357	6.845032e+002	6.880823e+001	781	48	8.525678e+000	0	0	0	0	0	0	672.744	1	1	47.2035	46.5172
DATA	2243	27	33	0	0	A_64_P121747	ENSRNOT00000050332	4400.5	372	1.366398e+001	7.158772e+000	116	46	1.007040e+001	0	0	0	0	0	0	13.3945	1	0	54.1152	45.5385
DATA	2244	27	34	0	0	A_42_P791436	NM_012750	4426.59	372.162	2.545716e+003	2.546691e+002	2496	51	7.094599e+000	0	0	0	0	0	0	2488.32	1	1	48.5334	51
DATA	2245	27	35	0	0	A_44_P349309	NM_001100890	4451.78	372.25	3.590428e+002	3.659349e+001	453.5	50	5.223615e+000	0	0	0	0	0	0	349.894	1	1	45.1352	50.3846
DATA	2246	27	36	0	0	A_42_P502621	NM_024401	4476.91	372.386	1.048450e+002	1.265746e+001	199	51.5	9.355343e+000	0	0	0	0	0	0	101.848	1	1	57.259	51.375
DATA	2247	27	37	0	0	A_43_P21574	NM_001012043	4502.51	372.881	9.419869e+001	1.180526e+001	195	51	1.059793e+001	0	0	0	0	0	0	91.1945	1	1	46.1809	51.9565
DATA	2248	27	38	0	0	A_44_P496331	NM_001001085	4527.74	372.885	8.139524e+001	1.082811e+001	177	51	1.175926e+001	0	0	0	0	0	0	78.5161	1	1	44.7812	50.9697
DATA	2249	27	39	0	0	A_64_P016503	ENSRNOT00000003659	4553.09	372.386	7.955091e+001	1.070861e+001	176	50.5	1.087354e+001	0	0	0	0	0	0	76.4418	1	1	57.259	51.9231
DATA	2250	27	40	0	0	A_43_P13270	NM_134415	4578.63	372.64	2.783463e+004	2.783473e+003	26290	55	1.071348e+001	0	0	0	0	0	0	26641	1	1	48.8603	53.4359
DATA	2251	27	41	0	0	A_42_P553960	NM_001107831	4603.94	372.3	1.231034e+004	1.231056e+003	11347	52	8.532898e+000	0	0	0	0	0	0	11733.5	1	1	46.8651	53.5
DATA	2252	27	42	0	0	A_44_P428997	NM_001107661	4629.42	372.427	4.916866e+002	4.970149e+001	548.5	53.5	1.084350e+001	0	0	0	0	0	0	466.649	1	1	57.5363	53.3077
DATA	2253	27	43	0	0	A_42_P619926	NM_001106578	4654.58	372.427	2.686488e+002	2.783641e+001	358	50	9.810708e+000	0	0	0	0	0	0	253.856	1	1	57.5363	51.8
DATA	2255	27	45	0	0	A_44_P524471	NM_001106408	4705.5	372.352	9.667170e+002	9.695129e+001	993	52	1.449768e+001	0	0	0	0	0	0	905.081	1	1	57.5363	54.129
DATA	2256	27	46	0	0	A_43_P10009	XM_347035	4731.19	372.588	8.901459e+003	8.901766e+002	8387	51.5	1.310459e+001	0	0	0	0	0	0	8294.03	1	1	46.5243	54.6111
DATA	2257	27	47	0	0	A_64_P068112	A_64_P068112	4756.5	372.808	9.886197e+003	9.886476e+002	10072.5	51	8.555097e+000	0	0	0	0	0	0	9167.23	1	1	40.6843	50.6944
DATA	2258	27	48	0	0	A_44_P191715	NM_021666	4782.92	372.717	7.501606e+000	7.467362e+000	99	46	1.137745e+001	0	0	0	0	0	0	-1.84755	0	0	43.7019	48.4884
DATA	2259	27	49	0	0	A_64_P035769	NM_001108962	4807.37	372.512	1.513552e+003	1.515411e+002	1492	50	1.252465e+001	0	0	0	0	0	0	1389.44	1	1	52.3208	50.1875
DATA	2260	27	50	0	0	A_64_P158469	XM_579990	4832.42	372.427	1.076791e+001	7.618361e+000	110	43	1.270687e+001	0	0	0	0	0	0	9.83515	1	0	57.5363	46.2581
DATA	2261	27	51	0	0	A_43_P12811	NM_053464	4857.49	372.551	1.883550e+003	1.885075e+002	1802	47	8.608622e+000	0	0	0	0	0	0	1711.68	1	1	46.5243	47.5862
DATA	2262	27	52	0	0	A_44_P370694	NM_001107961	4883.28	372.672	7.655763e+000	7.658682e+000	106	47	5.908370e+000	0	0	0	0	0	0	6.92061	1	0	46.1809	46.2963
DATA	2263	27	53	0	0	A_42_P749550	NM_001109359	4908.86	372.722	4.717908e+003	4.718530e+002	4306	49	1.014102e+001	0	0	0	0	0	0	4242.44	1	1	47.8731	49.5714
DATA	2264	27	54	0	0	A_64_P125893	ENSRNOT00000021391	4934.76	372.582	2.057922e+004	2.057936e+003	18198	45	8.956408e+000	0	0	0	0	0	0	18405.8	1	1	53.2255	46.3
DATA	2265	27	55	0	0	A_44_P1000653	NM_031531	4959.42	372.427	1.572639e+002	1.752867e+001	233.5	49	6.518647e+000	0	0	0	0	0	0	139.932	1	1	57.5363	47.1667
DATA	2266	27	56	0	0	A_64_P035992	A_64_P035992	4984.67	372.5	5.558787e+002	5.613000e+001	622.5	50	8.556823e+000	0	0	0	0	0	0	492.034	1	1	65	51.0541
DATA	2267	27	57	0	0	A_42_P592385	NM_022935	5010.6	372.984	2.289494e+001	8.151888e+000	120	48.5	1.148292e+001	0	0	0	0	0	0	20.1582	1	0	44.0646	48.0667
DATA	2268	27	58	0	0	A_64_P065624	ENSRNOT00000039260	5035.58	372.427	7.901033e+000	7.864966e+000	100	45	8.883356e+000	0	0	0	0	0	0	-0.843729	0	0	65	46.8929
DATA	2269	27	59	0	1	ERCC-00097_63	ERCC-00097_63	5061.54	372.785	2.115311e+001	8.184579e+000	119	45.5	1.086852e+001	0	0	0	0	0	0	18.4297	1	0	45.835	46.7647
DATA	2270	27	60	0	0	A_42_P477625	NM_001108719	5086.67	372.556	3.845761e+003	3.846582e+002	3343.5	49	9.624360e+000	0	0	0	0	0	0	3333.42	1	1	48.2044	49.0357
DATA	2271	27	61	0	0	A_42_P788030	NM_031618	5112.38	373	3.360411e+004	3.360420e+003	29079	45	9.367344e+000	0	0	0	0	0	0	28979.3	1	1	48.5334	46.3333
DATA	2272	27	62	0	0	A_44_P278247	XM_219377	5137.27	372.863	1.012748e+004	1.012780e+003	8553.5	46.5	7.686568e+000	0	0	0	0	0	0	8690.43	1	1	48.2044	44.25
DATA	2273	27	63	0	0	A_44_P189262	NM_024000	5162.79	372.74	1.701569e+004	1.701588e+003	14297	45	7.076639e+000	0	0	0	0	0	0	14528.4	1	1	48.5334	43.6897
DATA	2274	27	64	0	0	A_44_P212850	NM_019305	5187.89	372.5	6.341643e+001	1.029283e+001	156	48	8.743978e+000	0	0	0	0	0	0	53.8843	1	1	56.9804	46.3333
DATA	2275	27	65	0	0	A_64_P144278	NM_001106525	5213.5	372.5	1.222954e+004	1.222982e+003	10466	48	1.132659e+001	0	0	0	0	0	0	10341.6	1	1	46.5243	47.3333
DATA	2276	27	66	0	0	A_44_P683816	NM_001127488	5238.67	372.5	2.600969e+002	2.726677e+001	324	46	1.099677e+001	0	0	0	0	0	0	218.935	1	1	57.5363	46.9355
DATA	2277	27	67	0	0	A_64_P048712	A_64_P048712	5264.92	373.123	5.482938e+001	9.881631e+000	151	43	8.406748e+000	0	0	0	0	0	0	45.9431	1	1	45.835	44.1026
DATA	2278	27	68	0	0	A_64_P012813	NM_001106456	5290.3	372.849	9.276366e+000	8.309198e+000	108.5	48	1.043729e+001	0	0	0	0	0	0	7.73876	1	0	48.2044	46.2973
DATA	2280	27	70	0	0	A_42_P598602	NM_001077646	5340.42	372.573	2.654694e+001	8.738095e+000	120	44	7.393884e+000	0	0	0	0	0	0	21.9662	1	0	57.5363	44.1481
DATA	2281	27	71	0	0	A_44_P375380	NM_001191572	5365.81	373.235	1.550188e+002	1.761061e+001	224.5	45	6.874670e+000	0	0	0	0	0	0	127.793	1	1	46.1809	43.2414
DATA	2282	27	72	0	0	A_64_P113555	NM_001000025	5391.49	372.938	8.426026e+000	8.420975e+000	108.5	44	8.559972e+000	0	0	0	0	0	0	6.15476	0	0	44.4243	42.1613
DATA	2283	27	73	0	0	A_42_P590466	NM_001009676	5416.75	372.644	4.288080e+003	4.288906e+002	3499	45	9.843897e+000	0	0	0	0	0	0	3509.48	1	1	48.5334	46.1667
DATA	2284	27	74	0	0	A_44_P224987	XM_001058317	5441.89	372.5	4.949569e+001	9.787682e+000	134	43.5	9.105786e+000	0	0	0	0	0	0	40.3785	1	1	56.9804	44.7857
DATA	2285	27	75	0	0	A_42_P557315	NM_001106280	5467.74	372.778	6.944768e+003	6.945284e+002	5470.5	46.5	8.175975e+000	0	0	0	1	0	0	5648.65	1	1	47.5395	47.4286
DATA	2286	27	76	0	0	A_44_P375364	A_44_P375364	5492.58	372.573	7.060134e+001	1.104370e+001	159	42.5	1.155176e+001	0	0	0	0	0	0	57.2691	1	1	57.5363	44.4474
DATA	2287	27	77	0	0	A_44_P880152	NM_031553	5518.33	372.5	1.539169e+002	1.758938e+001	222	42	6.259771e+000	0	0	0	0	0	0	124.537	1	1	57.5363	42.5517
DATA	2288	27	78	0	0	A_64_P057575	NM_001191967	5543.7	373	1.284614e+002	1.542106e+001	198.5	44	8.576632e+000	0	0	0	0	0	0	103.724	1	1	49.1849	44.6
DATA	2289	27	79	0	0	A_64_P122183	ENSRNOT00000009823	5568.89	372.5	4.706961e+001	9.758621e+000	135	43.5	1.006059e+001	0	0	0	0	0	0	37.9301	1	1	56.9804	45.9737
DATA	2290	27	80	0	0	A_64_P057587	NM_019313	5594.63	373.265	4.160717e+001	9.518432e+000	131	45	9.720731e+000	0	0	0	0	0	0	33.4794	1	0	46.5243	46.7241
DATA	2291	27	81	0	0	A_42_P480769	XM_001081609	5619.58	372.573	4.879264e+002	4.954003e+001	485	43	1.260671e+001	0	0	0	0	0	0	392.068	1	1	57.5363	43.9355
DATA	2292	27	82	0	0	A_42_P623151	NM_031026	5645.44	372.973	2.879004e+004	2.879016e+003	22142	46	8.679147e+000	0	0	0	0	0	0	23113.7	1	1	48.5334	45.5517
DATA	2293	27	83	0	0	A_42_P550241	NM_022954	5671	373.132	8.624404e+000	8.585034e+000	97	42	8.554533e+000	0	0	0	0	0	0	-1.29027	0	0	46.8651	42.1765
DATA	2294	27	84	66	1	DarkCorner	DarkCorner	5695.81	372.57	8.627232e+000	8.587849e+000	83	42	8.823939e+000	0	0	0	0	0	0	-17.8342	0	0	58.0869	42.4063
DATA	2295	27	85	66	1	DarkCorner	DarkCorner	5721.42	372.573	8.625866e+000	8.594879e+000	93	41	7.834388e+000	0	0	0	1	0	0	3.04594	0	0	57.5363	40.8372
DATA	2296	28	1	66	1	DarkCorner	DarkCorner	3600.5	379	7.530727e+000	7.496350e+000	73	46.5	9.176278e+000	0	0	0	0	0	0	-20.1236	0	0	54.1152	45.8
DATA	2297	28	2	0	0	A_42_P802550	NM_017365	3626.5	379	5.973485e+002	6.019603e+001	656	48	1.128621e+001	0	0	0	0	0	0	553.299	1	1	54.1152	47.6129
DATA	2299	28	4	0	0	A_42_P619926	NM_001106578	3677	379	2.428480e+002	2.536763e+001	346.5	48	9.481993e+000	0	0	0	0	0	0	228.146	1	1	54.9904	49.9706
DATA	2300	28	5	0	0	A_64_P052441	ENSRNOT00000004876	3702.43	379.493	6.214694e+001	9.575281e+000	159	48.5	9.969830e+000	0	0	0	0	0	0	58.7693	1	1	46.5243	50.2353
DATA	2301	28	6	0	0	A_64_P056823	CA510211	3727.81	378.947	7.274248e+000	7.250854e+000	104.5	48	1.196159e+001	0	0	0	0	0	0	3.58732	0	0	42.5954	47.2188
DATA	2302	28	7	0	0	A_42_P669870	NM_001011919	3753.37	379.64	4.182116e+003	4.182736e+002	4096	48	1.237746e+001	0	0	0	0	0	0	4001.65	1	1	48.8603	47.1923
DATA	2303	28	8	0	0	A_42_P683634	NM_012946	3778.5	379.352	4.750292e+004	4.750297e+003	46106	52	1.347231e+001	0	0	0	0	0	0	45687.9	1	1	57.5363	53.3548
DATA	2304	28	9	0	0	A_42_P542809	NM_021671	3803.91	379.386	8.623832e+002	8.653236e+001	930	57	1.383504e+001	0	0	0	0	0	0	833.474	1	1	57.259	54.9429
DATA	2305	28	10	0	0	A_64_P065887	ENSRNOT00000024693	3829.39	379.638	1.551691e+002	1.706225e+001	247	47.5	1.261932e+001	0	0	0	0	0	0	150.645	1	1	47.5395	49.1667
DATA	2306	28	11	0	0	A_64_P043406	NM_001024902	3854.75	379.627	2.257855e+003	2.258960e+002	2243	51	9.880345e+000	0	0	0	0	0	0	2200.94	1	1	46.1809	51.6061
DATA	2307	28	12	0	0	A_64_P060769	NM_001191090	3880.48	379.654	1.962031e+003	1.963294e+002	2188	52	9.938952e+000	0	0	0	0	0	0	1919.73	1	1	40.6843	51.9
DATA	2308	28	13	0	0	A_64_P150789	A_64_P150789	3905.5	379.352	7.049860e+000	7.017678e+000	102	49.5	1.040168e+001	0	0	0	0	0	0	-0.321068	0	0	65	49.6
DATA	2309	28	14	0	0	A_64_P110254	NM_022404	3931.06	379.768	8.934413e+003	8.934687e+002	8771	51	1.089925e+001	0	0	0	0	0	0	8796.49	1	1	46.5243	51.2632
DATA	2310	28	15	0	0	A_42_P700753	FQ212883	3956.37	379.794	2.447747e+003	2.448742e+002	2447	51.5	9.927429e+000	0	0	0	0	0	0	2416.17	1	1	46.8651	51.0769
DATA	2311	28	16	0	0	A_42_P503768	NM_001009466	3981.81	379.739	4.199444e+002	4.256781e+001	512	47	9.501645e+000	0	0	0	0	0	0	415.449	1	1	46.5243	47.9063
DATA	2312	28	17	0	0	A_64_P106021	ENSRNOT00000017892	4007.14	379.407	7.785978e+001	1.043690e+001	181	49	9.988928e+000	0	0	0	0	0	0	77.1677	1	1	65	48.1026
DATA	2313	28	18	0	0	A_43_P10861	NM_001024879	4032.63	379.444	2.245876e+002	2.350648e+001	319.5	48.5	9.699504e+000	0	0	0	0	0	0	222.935	1	1	48.2044	49.0263
DATA	2314	28	19	0	0	A_44_P562251	BF545174	4057.89	379.5	1.177399e+002	1.366273e+001	210.5	47	9.504990e+000	0	0	0	0	0	0	117.013	1	1	56.9804	48
DATA	2315	28	20	0	0	A_42_P608768	ENSRNOT00000009898	4083.55	379.591	2.034368e+002	2.149008e+001	305	45	7.454133e+000	0	0	0	1	0	0	202.361	1	1	45.4864	45.1111
DATA	2316	28	21	0	0	A_64_P117115	NM_001109329	4108.71	379.881	1.340089e+001	7.049761e+000	114.5	48.5	1.095473e+001	0	0	0	0	0	0	13.3377	1	0	43.7019	48.6154
DATA	2317	28	22	0	0	A_64_P043331	ENSRNOT00000032411	4134.11	379.5	9.684705e+001	1.190287e+001	198	51	1.246404e+001	0	0	0	0	0	0	96.4087	1	1	65	49.931
DATA	2318	28	23	0	0	A_42_P664274	NM_001079705	4159.64	380.129	1.560696e+003	1.562229e+002	1637	50	1.154471e+001	0	0	0	0	0	0	1553.62	1	1	46.8651	50.0303
DATA	2319	28	24	0	0	A_64_P044593	NM_001173451	4184.67	379.5	4.778043e+002	4.827936e+001	575	47	9.668453e+000	0	0	0	0	0	0	475.433	1	1	57.5363	47.5135
DATA	2320	28	25	0	0	A_64_P006978	NM_001109371	4210.46	379.627	3.410530e+001	7.721523e+000	131	45	8.999164e+000	0	0	0	0	0	0	33.9137	1	0	42.2201	47.4194
DATA	2321	28	26	0	0	A_64_P119390	NM_001109519	4235.58	379.427	1.097691e+001	7.020485e+000	108	43.5	9.976666e+000	0	0	0	0	0	0	10.9048	1	0	57.5363	44.7353
DATA	2322	28	27	0	0	A_64_P034714	A_64_P034714	4261.11	379.5	5.409164e+001	8.801072e+000	155	44	7.663820e+000	0	0	0	0	0	0	53.6706	1	1	56.9804	44.9487
DATA	2323	28	28	0	0	A_44_P535959	NM_001107650	4286.64	379.781	2.917078e+002	2.998793e+001	390	46	9.211435e+000	0	0	0	0	0	0	289.012	1	1	44.7812	46.9643
DATA	2324	28	29	0	0	A_64_P286274	ENSRNOT00000055318	4312.36	380.134	2.193527e+002	2.301448e+001	307	48	1.149230e+001	0	0	0	0	0	0	216.949	1	1	45.835	50.0769
DATA	2325	28	30	0	0	A_44_P333384	NM_001024788	4337.83	379.906	1.616819e+001	7.163941e+000	116	45	7.135592e+000	0	0	0	0	0	0	15.9584	1	0	45.835	45.6
DATA	2326	28	31	0	0	A_42_P522194	NM_012914	4362.51	380.014	1.004967e+002	1.224401e+001	196	50	9.589480e+000	0	0	0	0	0	0	98.9778	1	1	48.5334	48.3793
DATA	2327	28	32	0	0	A_44_P273859	NM_017021	4388.11	379.5	7.044332e+000	7.012175e+000	91.5	49.5	9.031977e+000	0	0	0	0	0	0	-3.21768	0	0	56.9804	48.8125
DATA	2328	28	33	0	0	A_43_P11665	NM_013024	4413.73	379.797	6.306584e+001	9.445084e+000	162	51	9.965869e+000	0	0	0	0	0	0	61.7872	1	1	43.7019	49.3125
DATA	2329	28	34	0	0	A_64_P118273	NM_001170593	4438.67	379.5	7.850156e+001	1.055223e+001	157	48	7.179228e+000	0	0	0	0	0	0	76.687	1	1	57.5363	47.8148
DATA	2330	28	35	0	0	A_42_P762814	NM_031318	4464.41	379.746	5.828989e+003	5.829418e+002	5698	50	7.963742e+000	0	0	0	0	0	0	5676.37	1	1	47.5395	49.2759
DATA	2331	28	36	0	0	A_44_P384017	NM_031688	4489.73	379.915	3.706543e+002	3.773879e+001	468	51	1.259020e+001	0	0	0	0	0	0	359.76	1	1	43.7019	53.0714
DATA	2332	28	37	0	0	A_64_P118872	A_64_P118872	4515.11	379.5	1.076872e+001	7.203494e+000	108	56.5	1.517555e+001	0	0	0	0	0	0	10.415	1	0	56.9804	58.6563
DATA	2333	28	38	0	0	A_42_P599210	NM_001008326	4540.65	380.19	1.129362e+003	1.131622e+002	1213	50	1.208261e+001	0	0	0	0	0	0	1088.29	1	1	44.7812	50.2857
DATA	2334	28	39	0	0	A_44_P305801	NM_001033894	4565.85	380.194	3.848974e+003	3.849643e+002	3732	49	7.807882e+000	0	0	0	0	0	0	3694.77	1	1	45.1352	49.4857
DATA	2335	28	40	0	0	A_64_P085462	A_64_P085462	4591.33	379.5	6.659608e+004	6.659612e+003	63099	54.5	1.045261e+001	0	0	0	0	0	0	63664.1	1	1	57.5363	54
DATA	2336	28	41	0	0	A_42_P488000	NM_001108479	4616.5	379.5	1.023947e+003	1.026500e+002	1082	50	8.320035e+000	0	0	0	0	0	0	974.81	1	1	57.5363	51.5333
DATA	2337	28	42	0	0	A_42_P818546	NM_001191600	4642	379.545	1.125728e+003	1.128071e+002	1144	51	8.715396e+000	0	0	0	0	0	0	1067.06	1	1	55.8519	50.3793
DATA	2338	28	43	0	0	A_44_P488489	TC610872	4667.5	379.735	1.760426e+003	1.761938e+002	1713.5	53	1.178112e+001	0	0	0	0	0	0	1661.25	1	1	46.5243	53.7778
DATA	2339	28	44	0	0	A_64_P153971	A_64_P153971	4692.87	379.564	7.367147e+000	7.334558e+000	98	49.5	1.132066e+001	0	0	0	0	0	0	1.1614	0	0	42.9674	51.6875
DATA	2340	28	45	0	0	A_64_P077985	NM_001170478	4718.25	380.217	2.785265e+001	7.876334e+000	124	59	1.444115e+001	0	0	0	0	0	0	26.0423	1	0	44.0646	56.2414
DATA	2341	28	46	0	0	A_44_P576822	NM_080771	4743.39	379.93	1.611573e+003	1.613273e+002	1573	52	1.072788e+001	0	0	0	0	0	0	1499.62	1	1	48.2044	51.8286
DATA	2342	28	47	0	0	A_64_P134310	A_64_P134310	4769	379.545	6.231344e+001	9.704739e+000	158	47.5	1.089211e+001	0	0	0	0	0	0	57.6956	1	1	65	48.3696
DATA	2343	28	48	0	0	A_64_P134706	NM_001107533	4794.91	379.985	2.104358e+001	7.767853e+000	117	51	1.269146e+001	0	0	0	0	0	0	19.3865	1	0	46.8651	51.1613
DATA	2344	28	49	0	0	A_42_P469751	XM_001054007	4819.85	380.194	2.170268e+003	2.171569e+002	2093	52	1.248374e+001	0	0	0	0	0	0	1989.53	1	1	45.1352	50.7429
DATA	2345	28	50	0	0	A_64_P082653	ENSRNOT00000020906	4845.69	379.969	7.257145e+001	1.047504e+001	168	47	8.732450e+000	0	0	0	0	0	0	66.1801	1	1	45.4864	47.5455
DATA	2346	28	51	0	0	A_43_P18902	NM_001109221	4870.69	379.721	1.518163e+002	1.697440e+001	239	47	6.986760e+000	0	0	0	0	0	0	137.738	1	1	46.5243	46.7407
DATA	2347	28	52	0	0	A_64_P086719	ENSRNOT00000065918	4896	379.545	7.667362e+000	7.636296e+000	101	48	8.112841e+000	0	0	0	0	0	0	2.21215	0	0	55.8519	48.4545
DATA	2348	28	53	0	0	A_64_P138585	TC587165	4921.43	380.29	7.436844e+003	7.437240e+002	6651	49.5	8.866335e+000	0	0	0	0	0	0	6677.76	1	1	46.8651	50.0313
DATA	2349	28	54	0	0	A_64_P230444	ENSRNOT00000010282	4946.58	379.573	5.454015e+003	5.454560e+002	4856	47	5.778189e+000	0	0	0	0	0	0	4871.36	1	1	57.5363	46.8148
DATA	2350	28	55	0	0	A_64_P124427	TC642834	4972.42	379.573	8.590823e+001	1.157260e+001	179	48	5.988975e+000	0	0	0	0	0	0	76.3209	1	1	65	47.1667
DATA	2351	28	56	0	0	A_42_P778587	NM_001135767	4997.78	380.194	3.006616e+002	3.105993e+001	373	52	7.557955e+000	0	0	0	0	0	0	265.736	1	1	46.1809	51.2286
DATA	2352	28	57	0	0	A_42_P526030	NM_057197	5023.09	379.896	1.047792e+004	1.047821e+003	9109	46	1.094575e+001	0	0	0	0	0	0	9212.09	1	1	46.8651	47.5714
DATA	2353	28	58	0	0	A_64_P022561	XM_001070923	5048.88	380.083	7.036464e+001	1.056175e+001	165	44	8.617284e+000	0	0	0	0	0	0	61.5392	1	1	44.4243	45.5
DATA	2354	28	59	0	0	A_64_P126226	NM_001105901	5074.17	380.338	1.060994e+002	1.323807e+001	194.5	50	1.034107e+001	0	0	0	0	0	0	92.3194	1	1	45.4864	48.9429
DATA	2355	28	60	0	0	A_64_P089541	NM_001106214	5099.09	379.614	1.586744e+002	1.775106e+001	238.5	45	7.836986e+000	0	0	0	0	0	0	137.357	1	1	57.259	45.4688
DATA	2356	28	61	0	0	A_44_P205869	NM_138891	5124.5	379.648	1.047151e+003	1.050201e+002	962	46	6.420565e+000	0	0	0	0	0	0	901.897	1	1	57.5363	45.0968
DATA	2357	28	62	0	0	A_44_P491796	NM_012881	5149.91	379.614	2.155214e+002	2.300228e+001	289.5	46	6.405490e+000	0	0	0	0	0	0	184.701	1	1	65	44.697
DATA	2358	28	63	0	0	A_64_P132706	NM_001008304	5175.42	379.573	6.583891e+004	6.583896e+003	55285.5	45	8.035272e+000	0	0	0	0	0	0	56146.4	1	1	57.5363	44.9677
DATA	2359	28	64	0	0	A_64_P040715	NM_001011979	5201	380.424	1.412302e+003	1.414632e+002	1292	48	9.394259e+000	0	0	0	0	0	0	1198.77	1	1	45.4864	47.5714
DATA	2360	28	65	0	0	A_44_P191055	NM_001107693	5226.25	380.188	3.764642e+003	3.765525e+002	3167	41	1.027851e+001	0	0	0	0	0	0	3180.46	1	1	46.1809	42.8276
DATA	2361	28	66	0	0	A_64_P077493	XR_005942	5251.5	380	1.668029e+001	8.359287e+000	113	46	1.224959e+001	0	0	0	0	0	0	14.0277	1	0	54.1152	47.9459
DATA	2362	28	67	0	0	A_44_P317600	NM_012612	5277.07	380.214	4.555571e+002	4.629268e+001	486	46.5	7.706983e+000	0	0	0	0	0	0	381.425	1	1	46.8651	46.1842
DATA	2363	28	68	0	0	A_42_P751368	NM_001047874	5302.44	380.028	2.128814e+003	2.130417e+002	1864.5	47	8.988540e+000	0	0	0	0	0	0	1774.74	1	1	48.2044	44.9231
DATA	2364	28	69	0	0	A_42_P711568	NM_001107584	5327.77	380.116	1.179479e+004	1.179508e+003	9532	44	8.210548e+000	0	0	0	0	0	0	9792.99	1	1	46.5243	43.5185
DATA	2365	28	70	0	0	A_64_P091817	A_64_P091817	5353.5	380.179	8.155280e+002	8.197709e+001	773	45	7.175331e+000	0	0	0	0	0	0	674.433	1	1	49.1849	45.5263
DATA	2366	28	71	0	0	A_64_P006628	NM_172328	5378.56	380.014	6.517737e+001	1.060111e+001	156	45	7.333371e+000	0	0	0	0	0	0	53.7006	1	1	48.2044	42.7241
DATA	2367	28	72	0	0	A_64_P057760	NM_001191643	5403.85	380.136	2.471021e+002	2.609576e+001	301	44	6.966669e+000	0	0	0	0	0	0	202.879	1	1	46.1809	43.0345
DATA	2368	28	73	0	0	A_44_P150013	NM_001134495	5429.79	379.917	8.457642e+000	8.419033e+000	92.5	43	9.092434e+000	0	0	0	0	0	0	-6.2198	0	0	47.2035	44.2121
DATA	2369	28	74	0	0	A_44_P526975	NM_001002822	5454.94	379.889	2.213598e+002	2.369215e+001	274.5	43	7.784324e+000	0	0	0	0	0	0	180.565	1	1	45.4864	44.9355
DATA	2370	28	75	66	-1	(-)3xSLv1	NegativeControl	5480	380	8.507386e+000	8.468551e+000	80.5	49.5	1.242317e+001	0	0	0	0	0	0	-16.3607	0	0	54.9904	49.7059
DATA	2371	28	76	0	0	A_42_P648937	NM_001191732	5505.44	380.028	1.772465e+003	1.774498e+002	1500	43	9.690926e+000	0	0	0	0	0	0	1438.03	1	1	48.2044	42.8095
DATA	2372	28	77	0	0	A_44_P533786	NM_053749	5531.07	380.203	9.664369e+001	1.287728e+001	176	42.5	8.752692e+000	0	0	0	0	0	0	78.2276	1	1	47.5395	42.7647
DATA	2373	28	78	0	0	A_64_P156165	S68987	5556.4	380.292	7.097401e+003	7.097913e+002	5783	43	9.512075e+000	0	0	0	0	0	0	5733.36	1	1	47.8731	44.2903
DATA	2374	28	79	0	0	A_64_P084293	NM_001000525	5581.96	380.737	8.580831e+000	8.552074e+000	101	43	9.156158e+000	0	0	0	0	0	0	3.40255	0	0	42.9674	45.0909
DATA	2375	28	80	0	0	A_42_P708569	NM_001191837	5607.43	380.239	9.950516e+003	9.950883e+002	8211	41.5	1.120958e+001	0	0	0	0	0	0	8012.48	1	1	46.5243	43.6071
DATA	2376	28	81	0	0	A_64_P112215	NM_001110141	5632.5	380	3.668715e+002	3.767356e+001	392.5	46	1.028612e+001	0	0	0	0	0	0	295.081	1	1	54.1152	45.7857
DATA	2377	28	82	0	0	A_42_P567793	NM_001107668	5657.89	380.143	3.357866e+003	3.358959e+002	2609.5	41	8.516716e+000	0	0	0	0	0	0	2698.81	1	1	46.8651	41.3714
DATA	2378	28	83	0	0	A_42_P481087	XM_232226	5683.29	380.106	1.232804e+003	1.235782e+002	1051	42.5	7.386032e+000	0	0	0	1	0	0	990.425	1	1	45.835	42.1471
DATA	2379	28	84	66	1	DarkCorner	DarkCorner	5709.02	380.289	8.613657e+000	8.574336e+000	78	42	8.900012e+000	0	0	0	0	0	0	-17.6654	0	0	36.9964	41.8919
DATA	2380	28	85	66	1	DarkCorner	DarkCorner	5733.91	380.386	8.610542e+000	8.571236e+000	84.5	42	9.042609e+000	0	0	0	0	0	0	-10.9504	0	0	57.259	41.748
DATA	2381	29	1	66	1	DarkCorner	DarkCorner	3588.11	386.5	7.550663e+000	7.516195e+000	95	44.5	9.537074e+000	0	0	0	0	0	0	-8.42707	0	0	56.9804	45.3245
DATA	2382	29	2	66	1	DarkCorner	DarkCorner	3613.5	386.5	7.490965e+000	7.456769e+000	76.5	49	1.022030e+001	0	0	0	0	0	0	-25.4584	0	0	57.5363	49.1087
DATA	2383	29	3	0	0	A_64_P096512	NM_031782	3639.02	387.172	2.635121e+004	2.635131e+003	24206.5	48	7.528781e+000	0	0	0	0	0	0	24530.2	1	1	45.4864	47.3571
DATA	2384	29	4	0	0	A_44_P172814	NM_173102	3664.64	386.87	2.784659e+004	2.784669e+003	26388	47	9.850495e+000	0	0	0	0	0	0	26106.6	1	1	46.8651	48.5
DATA	2385	29	5	0	0	A_42_P788040	NM_001025053	3689.72	387.292	2.562561e+002	2.664486e+001	341	49	1.033538e+001	0	0	0	0	0	0	241.843	1	1	45.1352	50.5152
DATA	2386	29	6	0	0	A_42_P808945	NM_181368	3715.49	387.125	4.806932e+002	4.861347e+001	557	47	1.110568e+001	0	0	0	0	0	0	456.524	1	1	47.8731	47.4815
DATA	2387	29	7	0	0	A_64_P162713	A_64_P162713	3740.5	386.5	7.245504e+000	7.212429e+000	90.5	48	1.179229e+001	0	0	0	0	0	0	-13.361	0	0	57.5363	47.4839
DATA	2388	29	8	0	0	A_44_P501204	NM_017361	3765.67	386.5	2.884051e+002	2.971932e+001	392	47	1.211539e+001	0	0	0	0	0	0	276.939	1	1	57.5363	49.5
DATA	2389	29	9	0	0	A_42_P785926	NM_001108289	3791.08	386.681	1.238185e+003	1.240241e+002	1271	46.5	1.079171e+001	0	0	0	0	0	0	1194.99	1	1	47.8731	49.5667
DATA	2390	29	10	0	0	A_42_P616287	NM_001134555	3816.5	386.5	2.477460e+002	2.577322e+001	358	50	1.426771e+001	0	0	0	0	0	0	240.207	1	1	57.5363	49.3514
DATA	2391	29	11	66	-1	(-)3xSLv1	NegativeControl	3842.11	386.5	7.106897e+000	7.074454e+000	78.5	47	1.069021e+001	0	0	0	0	0	0	-22.9912	0	0	56.9804	48.8857
DATA	2392	29	12	0	0	A_43_P12365	NM_023101	3867.65	386.968	3.216961e+001	7.746251e+000	132	52	1.094018e+001	0	0	0	0	0	0	31.4478	1	0	44.0646	52
DATA	2393	29	13	0	0	A_64_P076643	ENSRNOT00000057620	3892.67	386.5	7.055167e+000	7.022961e+000	90.5	50.5	9.951979e+000	0	0	0	0	0	0	-10.8243	0	0	57.5363	50.5588
DATA	2394	29	14	0	0	A_64_P074865	XR_008898	3918.33	386.5	7.033023e+000	7.000918e+000	94	49.5	1.220220e+001	0	0	0	0	0	0	-4.21736	0	0	57.5363	50.8864
DATA	2395	29	15	0	0	A_64_P009582	XM_214287	3943.79	387	2.310164e+004	2.310174e+003	22370	52	1.192542e+001	0	0	0	0	0	0	22794.9	1	1	46.8651	53.2917
DATA	2396	29	16	0	0	A_44_P527270	NM_020073	3969	386.545	5.567042e+001	8.916553e+000	160	47	1.057199e+001	0	0	0	0	0	0	55.0585	1	1	55.8519	49.7273
DATA	2397	29	17	0	0	A_44_P530813	NM_012922	3994.71	387.167	5.067765e+002	5.115204e+001	608	47	8.300409e+000	0	0	0	0	0	0	502.276	1	1	45.835	46.775
DATA	2398	29	18	0	0	A_64_P078210	NM_001044303	4020.08	387.136	1.437940e+001	7.086040e+000	116	46	9.877649e+000	0	0	0	0	0	0	14.2757	1	0	46.1809	46.5714
DATA	2399	29	19	0	0	A_42_P764985	NM_133402	4045.4	386.757	7.031914e+003	7.032256e+002	6889	47.5	1.018298e+001	0	0	0	0	0	0	6990.32	1	1	47.2035	47.7143
DATA	2400	29	20	0	0	A_43_P23097	NM_001011965	4070.5	386.5	9.717682e+000	6.990609e+000	112	46	7.174106e+000	0	0	0	0	0	0	9.66972	1	0	57.5363	46.0303
DATA	2401	29	21	0	0	A_43_P19450	NM_001105713	4096	386.545	1.713928e+002	1.848273e+001	274	47	1.010839e+001	0	0	0	0	0	0	170.668	1	1	55.8519	48.7778
DATA	2402	29	22	0	0	A_42_P514419	NM_001009599	4121.57	387.299	1.724365e+003	1.725751e+002	1768	47	1.002837e+001	0	0	0	0	0	0	1717.88	1	1	46.1809	46.5455
DATA	2403	29	23	0	0	A_64_P123974	A_64_P123974	4146.82	387.136	6.945897e+000	6.937079e+000	105.5	49.5	1.020673e+001	0	0	0	0	0	0	5.60975	0	0	46.1809	50.375
DATA	2404	29	24	0	0	A_64_P221399	NM_134415	4172.57	387.29	3.430898e+003	3.431594e+002	3592	47.5	8.731236e+000	0	0	0	0	0	0	3417.45	1	1	46.8651	46.8
DATA	2405	29	25	0	0	A_44_P760124	A_44_P760124	4197.87	387.233	5.521857e+002	5.565040e+001	676	48	8.650167e+000	0	0	0	0	0	0	549.732	1	1	44.4243	48.5556
DATA	2406	29	26	0	0	A_42_P589551	NM_001037093	4223.14	387.03	4.114060e+003	4.114642e+002	4145	44	9.148257e+000	0	0	0	0	0	0	4092.39	1	1	46.5243	45.6579
DATA	2407	29	27	0	0	A_42_P645467	NM_001108804	4248.87	387.319	8.272120e+001	1.079291e+001	184.5	43	9.825562e+000	0	0	0	0	0	0	82.1975	1	1	46.1809	43.6667
DATA	2408	29	28	0	0	A_64_P036006	A_64_P036006	4274.29	387.092	7.494412e+000	6.982406e+000	102	46.5	8.616277e+000	0	0	0	0	0	0	7.43665	1	0	45.835	47.0333
DATA	2409	29	29	0	0	A_64_P088575	NM_001106355	4299.23	387.359	5.219146e+002	5.265256e+001	623	47	9.420986e+000	0	0	0	0	0	0	517.084	1	1	44.7812	46.2963
DATA	2410	29	30	0	0	A_42_P798776	XM_002725203	4324.73	387.357	5.653602e+003	5.654031e+002	5640	47.5	8.621278e+000	0	0	0	0	0	0	5590.75	1	1	46.8651	48.5333
DATA	2411	29	31	0	0	A_64_P017424	XM_001067041	4350	386.545	7.013350e+000	7.009572e+000	107	45	9.163501e+000	0	0	0	0	0	0	6.20184	0	0	55.8519	46.9714
DATA	2412	29	32	0	0	A_64_P147358	NM_001105764	4375.45	387.323	2.425117e+003	2.426126e+002	2513.5	46	8.478573e+000	0	0	0	0	0	0	2387.45	1	1	45.1352	46.1
DATA	2413	29	33	0	0	A_42_P522285	NM_001044263	4400.94	387.175	4.999616e+002	5.048598e+001	589	47	9.989057e+000	0	0	0	0	0	0	490.913	1	1	45.4864	47.6563
DATA	2414	29	34	0	0	A_64_P130184	NM_017207	4426.5	387.273	2.623086e+003	2.624030e+002	2639	48	9.689379e+000	0	0	0	0	0	0	2568.37	1	1	46.5243	46.1667
DATA	2415	29	35	0	0	A_44_P167930	NM_012720	4451.72	387.029	4.923836e+003	4.924342e+002	4762	49	6.979915e+000	0	0	0	0	0	0	4806.56	1	1	46.1809	48.1724
DATA	2416	29	36	0	0	A_64_P135305	NM_001013426	4477.09	387.328	1.011870e+004	1.011895e+003	9724	50.5	8.807015e+000	0	0	0	0	0	0	9846.27	1	1	45.1352	49.2813
DATA	2417	29	37	0	0	A_64_P100182	NM_001077678	4502.42	386.573	1.172099e+001	7.199990e+000	110	53	1.539285e+001	0	0	0	0	0	0	11.3656	1	0	57.5363	57.1613
DATA	2418	29	38	0	0	A_44_P521699	NM_001007728	4527.99	387.25	2.700546e+002	2.793063e+001	354.5	55	1.154701e+001	0	0	0	0	0	0	260.94	1	1	46.1809	54
DATA	2419	29	39	0	0	A_64_P053516	NM_001001280	4553.09	386.614	7.189214e+000	7.156396e+000	97	52	8.187323e+000	0	0	0	0	0	0	-0.701456	0	0	65	51.9677
DATA	2420	29	40	0	0	A_64_P073183	XM_001061392	4578.73	387.357	9.586842e+003	9.587111e+002	8934.5	51.5	8.476438e+000	0	0	0	0	0	0	9192.22	1	1	46.8651	52.4167
DATA	2421	29	41	0	0	A_64_P067447	NM_001109440	4603.91	386.614	1.460059e+003	1.461840e+002	1513.5	54	8.771834e+000	0	0	0	0	0	0	1394.15	1	1	65	54.5152
DATA	2422	29	42	0	0	A_64_P089251	NM_001014109	4629.43	387.262	1.927132e+002	2.058803e+001	284	51	7.980148e+000	0	0	0	0	0	0	183.245	1	1	45.835	51.2
DATA	2423	29	43	0	0	A_64_P118192	NM_022797	4655.23	387.116	6.547392e+002	6.587708e+001	719.5	50	1.099430e+001	0	0	0	0	0	0	619.79	1	1	46.5243	50.5185
DATA	2424	29	44	0	0	A_64_P082584	ENSRNOT00000024258	4680.49	387.361	8.300136e+001	1.105990e+001	180	53	1.095473e+001	0	0	0	0	0	0	78.2213	1	1	43.7019	53.6154
DATA	2425	29	45	0	0	A_42_P465677	NM_001106241	4705.93	387.186	2.515008e+002	2.620031e+001	335.5	48	1.270983e+001	0	0	0	0	0	0	235.914	1	1	46.8651	51.1613
DATA	2426	29	46	0	0	A_42_P781999	NM_001106378	4731.16	387.103	2.926746e+004	2.926755e+003	26885	53	9.285285e+000	0	0	0	0	0	0	27324.3	1	1	46.5243	54.7037
DATA	2427	29	47	0	0	A_44_P991472	NM_134374	4756.85	387.26	9.180988e+002	9.210878e+001	949	50	1.027904e+001	0	0	0	0	0	0	852.975	1	1	47.5395	49.9118
DATA	2428	29	48	0	0	A_42_P767737	AY724480	4781.86	387.211	5.538176e+003	5.538677e+002	5023.5	46.5	9.730051e+000	0	0	0	0	0	0	5120.4	1	1	47.2035	48.0227
DATA	2429	29	49	0	0	A_42_P648200	NM_001037356	4807.23	387.212	1.823394e+002	1.971156e+001	267	54	1.051129e+001	0	0	0	0	0	0	167.744	1	1	45.835	53.2222
DATA	2430	29	50	0	0	A_64_P006062	NM_001191695	4832.58	387.333	1.210894e+002	1.425708e+001	212	52	1.230006e+001	0	0	0	0	0	0	110.836	1	1	42.9674	50.8462
DATA	2431	29	51	0	0	A_42_P728230	NM_001037782	4858.09	387.104	5.587189e+003	5.587701e+002	5101	46	6.320725e+000	0	0	0	0	0	0	5087.67	1	1	46.8651	46.4815
DATA	2432	29	52	0	0	A_64_P106011	A_64_P106011	4883.44	386.919	7.639126e+000	7.604254e+000	96.5	45	7.325167e+000	0	0	0	0	0	0	-5.4303	0	0	44.0646	46.5161
DATA	2433	29	53	0	0	A_42_P622661	NM_001024292	4908.86	387.211	2.739370e+003	2.740436e+002	2514.5	46.5	8.454575e+000	0	0	0	0	0	0	2468.76	1	1	47.2035	47.9375
DATA	2434	29	54	0	0	A_42_P619844	NM_001030037	4934.44	387.411	1.061267e+004	1.061295e+003	9396.5	49.5	8.847689e+000	0	0	0	1	0	0	9514.35	1	1	47.5395	49.1667
DATA	2436	29	56	0	0	A_64_P128260	XM_001056985	4985.01	387.362	1.355009e+003	1.357232e+002	1277	50	5.877680e+000	0	0	0	0	0	0	1202.15	1	1	46.1809	48.2667
DATA	2437	29	57	0	0	A_44_P1034950	NM_053294	5010.64	387.13	4.508375e+002	4.575451e+001	497	51	1.233470e+001	0	0	0	0	0	0	397.859	1	1	46.8651	51.3333
DATA	2438	29	58	0	0	A_64_P080316	NM_139113	5035.5	387	2.319534e+002	2.448637e+001	305	44.5	9.437009e+000	0	0	0	0	0	0	203.65	1	1	54.1152	46.1667
DATA	2439	29	59	0	0	A_64_P053069	NM_001106820	5061.22	387.25	8.999391e+002	9.033884e+001	906	47.5	1.183472e+001	0	0	0	0	0	0	786.029	1	1	45.1352	48.9375
DATA	2440	29	60	0	0	A_42_P498066	NM_031136	5086.5	387	9.750572e+004	9.750575e+003	84397	46	9.647786e+000	0	0	0	0	0	0	84726.3	1	1	54.1152	45.8148
DATA	2441	29	61	0	0	A_44_P277068	ENSRNOT00000058491	5111.58	387.427	6.139446e+003	6.139963e+002	5371.5	44.5	1.068198e+001	0	0	0	0	0	0	5308.5	1	1	57.5363	47.2308
DATA	2442	29	62	0	0	A_44_P685613	XM_225679	5137.37	387.5	2.456970e+003	2.458274e+002	2220.5	47.5	4.964424e+000	0	0	0	0	0	0	2113.69	1	1	47.8731	46.8571
DATA	2443	29	63	0	0	A_64_P124364	ENSRNOT00000015807	5163.06	387.625	3.478716e+002	3.570579e+001	396.5	45.5	7.721997e+000	0	0	0	0	0	0	297.787	1	1	45.1352	44.6471
DATA	2444	29	64	0	0	A_42_P466362	NM_017142	5187.91	387.386	6.977558e+002	7.024250e+001	698.5	48	8.358011e+000	0	0	0	0	0	0	594.455	1	1	65	47.5278
DATA	2445	29	65	0	0	A_64_P081517	ENSRNOT00000037639	5213.59	387.375	8.027913e+001	1.142160e+001	168	44	9.270657e+000	0	0	0	0	0	0	68.0677	1	1	45.1352	44.1515
DATA	2446	29	66	0	0	A_42_P629394	NM_031683	5238.87	387.243	3.022118e+003	3.023220e+002	2596	48.5	1.339543e+001	0	0	0	0	0	0	2550.63	1	1	46.5243	47.3235
DATA	2447	29	67	0	0	A_44_P500975	NM_001000833	5264.07	387.542	2.396024e+001	8.540806e+000	118.5	46	9.828838e+000	0	0	0	0	0	0	20.1336	1	0	43.3362	47
DATA	2448	29	68	0	0	A_64_P165046	ENSRNOT00000015927	5289.8	387.368	7.725384e+001	1.129086e+001	166	47	8.327447e+000	0	0	0	0	0	0	64.6291	1	1	49.5074	46.2895
DATA	2449	29	69	0	0	A_44_P222865	XM_235305	5315	387.455	1.529535e+004	1.529557e+003	12743	40.5	8.240033e+000	0	0	0	0	0	0	12743.1	1	1	55.8519	40.75
DATA	2451	29	71	0	0	A_64_P131688	XM_574187	5365.58	387.427	9.710241e+000	8.389528e+000	109	45	9.392018e+000	0	0	0	0	0	0	8.02694	1	0	57.5363	45.28
DATA	2452	29	72	0	0	A_42_P556457	NM_001033931	5391.54	387.614	2.890285e+003	2.891495e+002	2449	46	1.063470e+001	0	0	0	1	0	0	2380.47	1	1	47.5395	45.4074
DATA	2453	29	73	0	0	A_42_P734384	NM_001108406	5416.58	387.427	2.951407e+003	2.952600e+002	2476	43.5	9.626702e+000	0	0	0	0	0	0	2422.53	1	1	57.5363	44.6875
DATA	2454	29	74	0	0	A_42_P728032	XM_001066058	5441.93	387.353	1.785040e+003	1.787024e+002	1526	45	1.191312e+001	0	0	0	0	0	0	1460.47	1	1	46.1809	48.8788
DATA	2455	29	75	0	0	A_64_P151525	A_64_P151525	5467.51	387.441	4.518568e+001	9.577466e+000	138	47.5	9.105728e+000	0	0	0	0	0	0	36.8598	1	1	46.5243	48
DATA	2456	29	76	0	0	A_43_P19276	ENSRNOT00000039523	5493.08	387.451	6.398575e+002	6.454361e+001	621.5	44.5	1.089706e+001	0	0	0	0	0	0	520.532	1	1	47.8731	44.7353
DATA	2457	29	77	0	0	A_44_P529811	NM_001107657	5518.11	387.5	1.378239e+001	8.599297e+000	113	41.5	8.735569e+000	0	0	0	0	0	0	11.1851	1	0	56.9804	42.4118
DATA	2458	29	78	0	0	A_64_P104640	A_64_P104640	5543.86	387.722	3.924305e+004	3.924315e+003	32026	46	6.738208e+000	0	0	0	0	0	0	31778.8	1	1	47.8731	45.1
DATA	2459	29	79	0	0	A_64_P003234	NM_001109048	5568.89	387.5	2.847858e+001	8.986015e+000	122	43	1.016899e+001	0	0	0	0	0	0	23.0179	1	0	65	44.3784
DATA	2460	29	80	0	0	A_64_P097158	NM_001000875	5594.42	387.427	8.575691e+000	8.536544e+000	89.5	43	8.539668e+000	0	0	0	0	0	0	-6.18077	0	0	57.5363	45.1852
DATA	2461	29	81	0	0	A_64_P141814	NM_001134629	5619.58	387.427	1.829173e+002	2.019019e+001	248	47	9.630150e+000	0	0	0	0	0	0	147.42	1	1	57.5363	46.8387
DATA	2462	29	82	0	0	A_42_P463602	NM_001107592	5645.11	387.5	8.594471e+000	8.586722e+000	103	44	8.799966e+000	0	0	0	0	0	0	5.9153	0	0	56.9804	43.2424
DATA	2463	29	83	0	0	A_64_P083366	NM_001077643	5670.8	387.667	2.138159e+004	2.138176e+003	17405	41	8.266974e+000	0	0	0	0	0	0	17206.5	1	1	45.4864	41.6667
DATA	2464	29	84	0	0	A_44_P121039	NM_172008	5696.1	387.792	3.239448e+002	3.350680e+001	359.5	41.5	7.743298e+000	0	0	0	0	0	0	260.638	1	1	49.1849	41.9063
DATA	2465	29	85	66	1	DarkCorner	DarkCorner	5721.42	387.427	8.600344e+000	8.561084e+000	83	42.5	9.224928e+000	0	0	0	0	0	0	-14.8931	0	0	57.5363	43.0833
DATA	2466	30	1	66	1	DarkCorner	DarkCorner	3600.67	393.556	7.511624e+000	7.477334e+000	86.5	43	9.300447e+000	0	0	0	0	0	0	-18.303	0	0	38.6789	45.2727
DATA	2467	30	2	0	0	A_42_P687443	NM_020100	3626.42	393.573	1.314647e+002	1.509555e+001	227	46	6.918081e+000	0	0	0	0	0	0	122.06	1	1	57.5363	46.8788
DATA	2468	30	3	0	0	A_42_P563382	ENSRNOT00000055321	3651.58	393.573	3.057808e+003	3.058695e+002	2979	44	4.808326e+000	0	0	0	0	0	0	2859.54	1	1	57.5363	44
DATA	2469	30	4	0	0	A_42_P667100	NM_001013932	3677	393.545	2.106483e+003	2.107753e+002	2071	51.5	8.676322e+000	0	0	0	0	0	0	1983.41	1	1	55.8519	51.25
DATA	2470	30	5	0	0	A_42_P553319	TC597248	3702.32	394.176	1.197177e+002	1.400562e+001	212.5	45.5	1.253817e+001	0	0	0	0	0	0	113.457	1	1	46.1809	48.0333
DATA	2471	30	6	0	0	A_64_P151358	NM_181695	3727.58	393.573	7.957077e+000	7.269753e+000	111	48	9.696139e+000	0	0	0	0	0	0	7.58543	1	0	57.5363	46.7188
DATA	2472	30	7	0	0	A_44_P196743	ENSRNOT00000007795	3753.42	393.573	6.826377e+001	1.326880e+001	146	46	1.196357e+001	0	0	0	0	0	0	65.4468	1	1	57.5363	47.7576
DATA	2474	30	9	0	0	A_64_P127111	NM_001106004	3804	394.226	1.370806e+004	1.370825e+003	13004	51	1.238804e+001	0	0	0	0	0	0	13274.9	1	1	45.4864	53.2778
DATA	2475	30	10	0	0	A_42_P470775	NM_001025126	3829.5	394.375	2.393252e+003	2.394299e+002	2366	46	1.199076e+001	0	0	0	0	0	0	2327.95	1	1	44.4243	45.8182
DATA	2476	30	11	0	0	A_44_P472855	NM_001000961	3855.24	394.318	8.325302e+001	1.091130e+001	183	47	9.685040e+000	0	0	0	0	0	0	81.3113	1	1	45.4864	48.5
DATA	2477	30	12	0	0	A_64_P080682	NM_001109652	3880.28	394.121	7.060201e+000	7.027972e+000	95.5	48	1.136381e+001	0	0	0	0	0	0	-4.98679	0	0	43.3362	49.8929
DATA	2478	30	13	0	0	A_42_P727368	NM_001025693	3905.41	394.439	7.045389e+001	9.935143e+000	173	47	1.159979e+001	0	0	0	0	0	0	69.2832	1	1	45.1352	49.0217
DATA	2479	30	14	0	0	A_64_P034427	A_64_P034427	3931.12	394.269	4.298240e+003	4.298807e+002	4286	48.5	1.054514e+001	0	0	0	0	0	0	4239.19	1	1	45.835	49
DATA	2480	30	15	0	0	A_64_P042871	A_64_P042871	3956.34	394.143	5.450115e+002	5.494464e+001	668.5	51	1.383317e+001	0	0	0	0	0	0	538.879	1	1	46.8651	54.24
DATA	2481	30	16	0	0	A_64_P152617	NM_001105747	3981.5	394	7.995834e+000	6.997747e+000	108	47	8.317313e+000	0	0	0	0	0	0	7.92297	1	0	54.1152	47.5714
DATA	2482	30	17	0	0	A_44_P468879	NM_001007798	4007.39	394.682	1.064303e+001	7.019431e+000	114	47	1.040483e+001	0	0	0	0	0	0	10.5668	1	0	38.2652	47.2821
DATA	2483	30	18	0	0	A_44_P252976	NM_001012071	4032.78	394.134	1.723503e+002	1.857544e+001	267.5	47	1.086088e+001	0	0	0	0	0	0	171.363	1	1	46.1809	46.9063
DATA	2484	30	19	0	0	A_64_P014080	NM_022189	4057.91	393.935	6.952055e+000	6.920319e+000	98.5	45	7.777444e+000	0	0	0	0	0	0	-2.11578	0	0	54.4085	45.6364
DATA	2485	30	20	0	0	A_44_P204789	NM_001025684	4083.59	394.098	4.718651e+002	4.769039e+001	565	45.5	5.194672e+000	0	0	0	0	0	0	470.114	1	1	49.8279	45.2308
DATA	2486	30	21	0	0	A_64_P030373	NM_001127319	4108.5	394	2.906191e+001	7.496883e+000	128	47	9.467431e+000	0	0	0	0	0	0	28.969	1	0	54.1152	45.9677
DATA	2487	30	22	0	0	A_42_P558703	NM_001106810	4134.42	394.324	4.503418e+002	4.556105e+001	559	51	1.036941e+001	0	0	0	0	0	0	449.02	1	1	47.2035	49.1034
DATA	2488	30	23	0	0	A_44_P241190	NM_001013199	4159.5	394.258	1.013499e+003	1.015852e+002	1094.5	50	1.077562e+001	0	0	0	0	0	0	1010.44	1	1	46.5243	49.7742
DATA	2489	30	24	0	0	A_42_P539095	XM_001081794	4185.07	394.214	1.077400e+003	1.079615e+002	1178	46	8.769615e+000	0	0	0	0	0	0	1073.73	1	1	46.8651	46.1154
DATA	2490	30	25	0	0	A_64_P010905	ENSRNOT00000057216	4210.29	394.262	2.039307e+002	2.153408e+001	308	45.5	9.191049e+000	0	0	0	0	0	0	203.104	1	1	45.1352	46.6538
DATA	2491	30	26	0	0	A_44_P500660	NM_001007645	4235.5	394	5.229569e+002	5.275197e+001	626	43	8.020245e+000	0	0	0	0	0	0	520.334	1	1	54.1152	42.8108
DATA	2492	30	27	0	0	A_64_P056436	A_64_P056436	4261.18	394.088	2.215043e+002	2.320972e+001	327	45	1.165361e+001	0	0	0	0	0	0	220.124	1	1	46.5243	47.16
DATA	2493	30	28	0	0	A_42_P773816	NM_017079	4286.43	394.239	1.617751e+002	1.760402e+001	264.5	47	9.184770e+000	0	0	0	0	0	0	160.533	1	1	46.5243	46.88
DATA	2494	30	29	0	0	A_64_P138604	NM_001009967	4311.61	394.069	6.196609e+004	6.196613e+003	61220	48	1.160414e+001	0	0	0	0	0	0	61383.1	1	1	53.8203	50.7391
DATA	2495	30	30	0	0	A_42_P705302	NM_001107361	4337.26	394.353	9.373675e+003	9.373934e+002	9245.5	47	8.849085e+000	0	0	0	0	0	0	9267.13	1	1	46.1809	47.8378
DATA	2496	30	31	0	0	A_64_P027259	NM_001191656	4362.94	394.235	2.463461e+004	2.463471e+003	24277.5	46	9.705317e+000	0	0	0	0	0	0	24299.4	1	1	46.1809	48.5455
DATA	2497	30	32	0	0	A_44_P288333	ENSRNOT00000006659	4388.32	394.354	3.352296e+002	3.424616e+001	436	47	1.011557e+001	0	0	0	0	0	0	329.858	1	1	45.4864	48.4839
DATA	2498	30	33	0	0	A_42_P618217	NM_130752	4413.64	394.136	5.052530e+001	8.648959e+000	151	47.5	9.280805e+000	0	0	0	0	0	0	49.5813	1	1	45.4864	46.2667
DATA	2499	30	34	0	0	A_64_P151587	A_64_P151587	4438.36	394.523	7.071557e+000	7.039276e+000	93	48	7.983830e+000	0	0	0	0	0	0	-4.76663	0	0	38.6789	47.6923
DATA	2500	30	35	0	0	A_42_P771107	NM_001108217	4464.16	394.118	1.274685e+003	1.276639e+002	1334.5	48.5	7.331890e+000	0	0	0	0	0	0	1243.4	1	1	46.5243	47.1429
DATA	2501	30	36	0	0	A_42_P689013	NM_053800	4489.74	394.271	2.101024e+004	2.101036e+003	20010	55	1.587681e+001	0	0	0	0	0	0	20426.8	1	1	46.8651	56.1613
DATA	2502	30	37	0	0	A_64_P155334	NM_001100945	4515.45	394.605	4.051218e+003	4.051842e+002	3884	55.5	1.457295e+001	0	0	0	0	0	0	3924.95	1	1	49.8279	57.375
DATA	2503	30	38	0	0	A_64_P049007	A_64_P049007	4540.65	394.631	2.559016e+001	7.581104e+000	126	52	1.068009e+001	0	0	0	0	0	0	24.7023	1	0	45.1352	53.0667
DATA	2504	30	39	0	0	A_44_P351461	ENSRNOT00000027179	4566	394.871	2.218499e+001	7.499074e+000	119	50	8.339732e+000	0	0	0	0	0	0	21.3338	1	0	45.4864	50.6364
DATA	2505	30	40	0	0	A_44_P604267	NM_022933	4591.33	394.458	3.074752e+002	3.157755e+001	393	55	8.857424e+000	0	0	0	0	0	0	294.483	1	1	48.2044	54.9444
DATA	2506	30	41	0	0	A_64_P070475	XM_001061514	4616.5	394.352	7.255405e+000	7.222284e+000	84	50	1.123148e+001	0	0	0	0	0	0	-13.458	0	0	57.5363	49.1714
DATA	2507	30	42	0	0	A_64_P119963	A_64_P119963	4641.97	394.406	1.752356e+003	1.753856e+002	1749	49	9.247958e+000	0	0	0	0	0	0	1664.2	1	1	44.4243	49.5161
DATA	2508	30	43	0	0	A_42_P658562	NM_001134416	4667.61	394.328	3.296138e+002	3.375707e+001	415	50	1.090336e+001	0	0	0	0	0	0	311.63	1	1	45.835	50.037
DATA	2509	30	44	0	0	A_64_P116830	A_64_P116830	4692.58	394.427	3.930360e+001	8.307314e+000	137.5	48	9.877451e+000	0	0	0	0	0	0	36.9935	1	1	57.5363	49.7241
DATA	2510	30	45	0	0	A_64_P048531	ENSRNOT00000019473	4718.42	394.427	1.017173e+002	1.255146e+001	193	51	1.281797e+001	0	0	0	0	0	0	95.285	1	1	57.5363	54.8696
DATA	2511	30	46	0	0	A_64_P122716	NM_139331	4743.58	394.427	7.422329e+000	7.400108e+000	102	50	9.358140e+000	0	0	0	0	0	0	3.87178	0	0	57.5363	49.3143
DATA	2512	30	47	0	0	A_64_P077323	NM_201992	4769	394.455	7.458535e+000	7.431134e+000	103	49	1.042446e+001	0	0	0	0	0	0	2.91549	0	0	55.8519	50.9211
DATA	2513	30	48	0	0	A_42_P569711	NM_001108977	4794.63	394.493	4.536406e+002	4.597362e+001	506	49	1.124907e+001	0	0	0	0	0	0	418.801	1	1	48.5334	50.3333
DATA	2514	30	49	0	0	A_42_P474100	NM_001191820	4820	394.271	6.997671e+003	6.998073e+002	6285	52	1.187702e+001	0	0	0	0	0	0	6427.73	1	1	46.8651	52.7222
DATA	2515	30	50	0	0	A_64_P026404	A_64_P026404	4845.33	394.5	7.571796e+000	7.537231e+000	98.5	48	8.191774e+000	0	0	0	0	0	0	-1.59107	0	0	57.5363	49.5294
DATA	2516	30	51	0	0	A_64_P026581	ENSRNOT00000029099	4870.94	394.536	4.732603e+003	4.733210e+002	4332	43.5	7.554857e+000	0	0	0	0	0	0	4303.01	1	1	47.5395	45.6
DATA	2517	30	52	0	0	A_64_P043624	NM_133565	4896.25	394.627	3.869611e+003	3.870360e+002	3713	49	8.552870e+000	0	0	0	0	0	0	3500.31	1	1	46.1809	49.1389
DATA	2518	30	53	0	0	A_44_P417429	NM_001011983	4921.56	394.74	3.452070e+003	3.452919e+002	3155.5	48.5	7.711738e+000	0	0	0	0	0	0	3106.54	1	1	49.5074	49.2857
DATA	2519	30	54	0	0	A_64_P007574	ENSRNOT00000028681	4946.86	394.743	1.949164e+004	1.949179e+003	17135.5	45.5	6.574327e+000	0	0	0	0	0	0	17449.7	1	1	48.2044	46.0625
DATA	2520	30	55	0	0	A_42_P529690	NM_001173510	4972.51	394.64	3.845922e+004	3.845930e+003	34462	50	6.348019e+000	0	0	0	0	0	0	34248.5	1	1	49.8279	48.8788
DATA	2521	30	56	0	0	A_42_P505070	TC624062	4997.89	394.88	4.167195e+003	4.167920e+002	3822	49	1.030480e+001	0	0	0	1	0	0	3691.77	1	1	47.8731	47.4118
DATA	2522	30	57	0	0	A_42_P504653	NM_017143	5022.89	394.5	2.861783e+001	8.323521e+000	120.5	48	1.106209e+001	0	0	0	0	0	0	25.2218	1	0	65	47.6452
DATA	2523	30	58	0	0	A_64_P017891	A_64_P017891	5048.42	394.427	7.892992e+000	7.856962e+000	94	45	1.045277e+001	0	0	0	0	0	0	-5.44226	0	0	57.5363	47.2821
DATA	2524	30	59	0	0	A_42_P642724	NM_001107585	5073.81	394.725	4.371058e+003	4.371771e+002	3850	46	8.647001e+000	0	0	0	0	0	0	3812.86	1	1	46.8651	45.5278
DATA	2525	30	60	0	0	A_42_P780943	NM_001011906	5099.11	394.5	1.038835e+003	1.041863e+002	1005.5	43	1.288285e+001	0	0	0	0	0	0	901.559	1	1	65	47.697
DATA	2526	30	61	0	0	A_44_P482325	NM_145669	5124.5	394.5	7.174142e+002	7.218359e+001	689	48	8.041912e+000	0	0	0	0	0	0	619.491	1	1	57.5363	48.7879
DATA	2527	30	62	0	0	A_42_P716750	NM_001024757	5149.89	394.5	3.214969e+002	3.313420e+001	376	45	5.455837e+000	0	0	0	0	0	0	276.243	1	1	56.9804	44.6154
DATA	2528	30	63	0	0	A_64_P009565	NM_001191823	5175.59	394.753	2.109042e+002	2.257673e+001	279	46	9.216489e+000	0	0	0	0	0	0	180.336	1	1	48.5334	45.7667
DATA	2529	30	64	0	0	A_42_P495969	NM_012824	5200.86	395.188	1.009132e+004	1.009164e+003	8572	46	9.293804e+000	0	0	0	1	0	0	8588.54	1	1	45.4864	44.0857
DATA	2530	30	65	0	0	A_64_P154671	ENSRNOT00000024704	5226.75	394.783	1.637227e+002	1.828104e+001	238.5	46	1.018518e+001	0	0	0	0	0	0	138.672	1	1	46.8651	46.0625
DATA	2531	30	66	0	0	A_44_P111337	NM_001108724	5251.81	394.608	2.677311e+003	2.678557e+002	2346	45	1.373305e+001	0	0	0	0	0	0	2257.48	1	1	49.1849	45.8571
DATA	2532	30	67	0	0	A_42_P665627	NM_023095	5277.09	394.833	3.048319e+001	8.753066e+000	123	47	7.241013e+000	0	0	0	0	0	0	25.592	1	0	41.0736	45.8529
DATA	2533	30	68	0	0	A_44_P447585	NM_001166676	5302.42	394.573	8.278115e+000	8.243775e+000	103.5	43	7.449524e+000	0	0	0	0	0	0	1.99309	0	0	57.5363	42.5667
DATA	2534	30	69	0	0	A_42_P463754	NM_030994	5327.58	394.573	4.406327e+002	4.483332e+001	458	46	7.871661e+000	0	0	0	0	0	0	366.863	1	1	57.5363	45.9655
DATA	2535	30	70	0	0	A_42_P644717	NM_001108927	5353.11	394.5	8.344540e+000	8.306448e+000	97	45	8.012906e+000	0	0	0	0	0	0	-3.90342	0	0	56.9804	46.04
DATA	2536	30	71	0	0	A_42_P546539	NM_001135801	5378.5	394.5	7.092145e+002	7.140984e+001	678	46	9.058920e+000	0	0	0	1	0	0	585.969	1	1	57.5363	45.7241
DATA	2537	30	72	0	0	A_42_P818297	XM_001073988	5404.23	394.813	1.756117e+003	1.758109e+002	1536	46	1.324206e+001	0	0	0	0	0	0	1445.87	1	1	48.8603	49.069
DATA	2538	30	73	0	0	A_64_P047416	NM_001109501	5429.68	394.75	2.372940e+002	2.517048e+001	297	43	9.656198e+000	0	0	0	0	0	0	194.723	1	1	49.5074	43.6296
DATA	2539	30	74	0	0	A_43_P18389	XM_002726292	5454.58	394.573	8.458864e+000	8.457402e+000	107	42.5	8.731697e+000	0	0	0	0	0	0	6.47812	0	0	57.5363	45.0263
DATA	2540	30	75	0	0	A_64_P044276	NM_001105946	5480.58	395.106	3.599018e+003	3.600008e+002	3012	48	1.061983e+001	0	0	0	0	0	0	2936.11	1	1	45.4864	49.6471
DATA	2541	30	76	0	0	A_64_P059475	ENSRNOT00000029976	5505.75	395.373	8.503859e+000	8.465040e+000	86	41	1.110488e+001	0	0	0	0	0	0	-13.6493	0	0	46.1809	43.5806
DATA	2542	30	77	0	0	A_64_P005496	A_64_P005496	5530.58	394.573	1.448869e+001	8.608396e+000	111.5	45.5	8.502134e+000	0	0	0	0	0	0	11.7619	1	0	57.5363	44.1875
DATA	2544	30	79	0	0	A_42_P739860	NM_133578	5581.63	395	2.983271e+003	2.984486e+002	2369	46	1.015609e+001	0	0	0	0	0	0	2412.84	1	1	48.5334	45.2903
DATA	2545	30	80	0	0	A_42_P681251	NM_030844	5607.25	395.319	4.456978e+003	4.457794e+002	3566	45	7.535139e+000	0	0	0	0	0	0	3599.79	1	1	46.8651	45.7241
DATA	2546	30	81	0	0	A_42_P567793	NM_001107668	5632.69	394.662	3.407440e+003	3.408510e+002	2654	45	9.244353e+000	0	0	0	0	0	0	2748.71	1	1	48.5334	42.4839
DATA	2547	30	82	0	0	A_64_P041662	NM_182843	5658.31	395.014	4.667458e+002	4.745039e+001	454	42	8.682698e+000	0	0	0	0	0	0	376.252	1	1	47.2035	42.4516
DATA	2548	30	83	0	0	A_42_P534679	NM_001134974	5683.5	395	2.907983e+003	2.909239e+002	2338.5	43.5	9.115101e+000	0	0	0	0	0	0	2343.22	1	1	48.5334	43.1333
DATA	2549	30	84	66	1	DarkCorner	DarkCorner	5708.5	394.648	8.589026e+000	8.549818e+000	72.5	41	9.241212e+000	0	0	0	0	0	0	-24.6779	0	0	65	41.8333
DATA	2550	30	85	66	1	DarkCorner	DarkCorner	5734	394.545	8.586298e+000	8.547102e+000	84	43	9.742498e+000	0	0	0	0	0	0	-12.5789	0	0	55.8519	43.3927
DATA	2551	31	1	66	1	DarkCorner	DarkCorner	3588.52	401.242	7.530435e+000	7.496059e+000	92	43	9.651597e+000	0	0	0	0	0	0	-7.57616	0	0	42.9674	44.6578
DATA	2552	31	2	0	0	A_42_P576549	NM_001106490	3613.91	401.343	7.471473e+000	7.437367e+000	97	48	9.966538e+000	0	0	0	0	0	0	-7.66339	0	0	45.835	48.1522
DATA	2553	31	3	0	0	A_42_P542638	NM_001012202	3638.97	401.639	9.475191e+002	9.503910e+001	1000	45.5	6.045244e+000	0	0	0	0	0	0	884.092	1	1	43.7019	46.2143
DATA	2554	31	4	0	0	A_42_P765736	NM_001025670	3664.63	401.268	1.565408e+001	7.496451e+000	120	46	7.966095e+000	0	0	0	0	0	0	14.709	1	0	47.5395	47.3438
DATA	2555	31	5	0	0	A_44_P372461	NM_001170708	3690.14	401.486	5.875140e+002	5.920105e+001	671	51	7.316390e+000	0	0	0	0	0	0	555.72	1	1	46.8651	50.3793
DATA	2556	31	6	0	0	A_64_P070554	XM_001059856	3715.43	401.382	2.912847e+001	7.802351e+000	129	45	1.145018e+001	0	0	0	0	0	0	27.7213	1	0	46.5243	46.24
DATA	2557	31	7	0	0	A_64_P030859	ENSRNOT00000045252	3740.65	401.471	2.194616e+004	2.194628e+003	21012.5	47.5	9.424789e+000	0	0	0	0	0	0	21006.1	1	1	45.835	47.3182
DATA	2558	31	8	0	0	A_64_P079260	NM_001005546	3765.61	401.069	2.179519e+002	2.294096e+001	321	43	7.565179e+000	0	0	0	0	0	0	209.706	1	1	53.8203	45.0571
DATA	2559	31	9	0	0	A_64_P149846	A_64_P149846	3791.36	401.219	1.959071e+004	1.959084e+003	19098.5	44	8.520082e+000	0	0	0	0	0	0	18945.1	1	1	44.7812	45.1176
DATA	2560	31	10	0	0	A_64_P120624	NM_031634	3816.5	401.352	7.123502e+000	7.104504e+000	104	48	1.220401e+001	0	0	0	0	0	0	4.25589	0	0	65	49.3429
DATA	2561	31	11	0	0	A_64_P158020	NM_001008909	3842.09	401.386	2.978491e+001	7.663556e+000	130	44	8.573039e+000	0	0	0	0	0	0	29.0573	1	0	57.259	43.9459
DATA	2562	31	12	0	0	A_64_P116606	NM_153724	3868.19	401.492	2.707149e+001	7.536407e+000	127	49	1.115422e+001	0	0	0	0	0	0	26.514	1	0	43.7019	50.3333
DATA	2563	31	13	0	0	A_44_P532436	ENSRNOT00000006946	3892.9	401.746	7.041880e+000	7.025579e+000	104	47	1.080509e+001	0	0	0	0	0	0	4.63415	0	0	43.7019	49
DATA	2564	31	14	0	0	A_64_P027545	NM_023095	3918.93	401.965	1.700195e+002	1.838184e+001	279.5	48	1.270378e+001	0	0	0	0	0	0	167.611	1	1	43.3362	49.9688
DATA	2565	31	15	0	0	A_64_P076705	NM_017088	3943.5	401.352	1.045721e+005	1.045721e+004	103369	50	1.151525e+001	0	0	0	0	0	0	103354	1	1	57.5363	51.3793
DATA	2566	31	16	0	0	A_44_P238642	NM_001127201	3969	401.729	5.396078e+003	5.396526e+002	5446	47	1.143508e+001	0	0	0	0	0	0	5346.09	1	1	46.8651	49.8049
DATA	2567	31	17	0	0	A_64_P037249	NM_001105802	3994.99	401.771	4.326678e+001	8.177132e+000	141.5	50	9.594992e+000	0	0	0	0	0	0	42.9543	1	1	46.8651	49.2286
DATA	2568	31	18	0	0	A_64_P061524	NM_172064	4019.92	401.785	2.992417e+002	3.071553e+001	404	45	8.721165e+000	0	0	0	0	0	0	297.567	1	1	49.8279	44.6061
DATA	2569	31	19	0	0	A_42_P536564	NM_001008344	4045.5	401.5	5.060137e+003	5.060610e+002	5171	48	8.493695e+000	0	0	0	0	0	0	5038.42	1	1	49.1849	47.0714
DATA	2570	31	20	0	0	A_64_P062433	NM_001135804	4070.79	401.947	7.981686e+002	8.011550e+001	925	45	5.264436e+000	0	0	0	0	0	0	795.577	1	1	42.5954	45
DATA	2571	31	21	0	0	A_42_P665509	NM_053777	4096	401.455	5.379597e+004	5.379602e+003	53611	48	8.162878e+000	0	0	0	0	0	0	53655	1	1	55.8519	47.5152
DATA	2572	31	22	0	0	A_44_P250144	NM_001001373	4121.76	402.258	6.935115e+000	6.903457e+000	93	49	1.178776e+001	0	0	0	0	0	0	-4.29614	0	0	45.1352	49.35
DATA	2573	31	23	0	0	A_42_P746838	NM_001024286	4146.58	401.427	1.009119e+001	6.976975e+000	112.5	52	9.580530e+000	0	0	0	0	0	0	10.0692	1	0	57.5363	50.9143
DATA	2574	31	24	0	0	A_44_P210852	NM_001034187	4172.42	401.427	7.005435e+001	9.836578e+000	174	51	1.020468e+001	0	0	0	0	0	0	69.8853	1	1	57.5363	50.7241
DATA	2575	31	25	0	0	A_64_P019390	A_64_P019390	4197.58	401.427	1.352326e+001	7.039909e+000	115	44	7.475085e+000	0	0	0	0	0	0	13.4837	1	0	57.5363	44.7576
DATA	2576	31	26	0	0	A_64_P134709	NM_001105760	4223	401.455	1.441107e+002	1.598397e+001	243	44	9.997479e+000	0	0	0	0	0	0	143.573	1	1	55.8519	45.1429
DATA	2578	31	28	0	0	A_64_P028117	NM_001000372	4273.58	401.427	3.380162e+001	7.711405e+000	133	47	1.057907e+001	0	0	0	0	0	0	33.5942	1	0	57.5363	47.6
DATA	2579	31	29	0	0	A_44_P391517	NM_001034144	4299.33	401.5	2.993958e+002	3.073394e+001	395	49	8.052856e+000	0	0	0	0	0	0	297.075	1	1	57.5363	46.9091
DATA	2580	31	30	0	0	A_42_P743682	NM_133599	4324.5	401.5	3.638811e+001	7.849568e+000	138	49	1.010014e+001	0	0	0	0	0	0	36.0395	1	1	57.5363	51.2903
DATA	2581	31	31	0	0	A_64_P163075	NM_001109321	4349.89	401.5	3.310278e+001	7.716008e+000	133	45	1.018122e+001	0	0	0	0	0	0	32.7167	1	0	65	47.0256
DATA	2582	31	32	0	0	A_44_P393422	NM_001013188	4375.42	401.427	1.400173e+003	1.401915e+002	1434	45.5	8.818802e+000	0	0	0	0	0	0	1380.58	1	1	57.5363	46.5667
DATA	2583	31	33	0	0	A_44_P288982	NM_001107913	4400.58	401.427	8.910665e+001	1.133392e+001	192.5	39	9.559772e+000	0	0	0	0	0	0	87.6364	1	1	57.5363	43.4516
DATA	2584	31	34	0	0	A_64_P009788	NM_001191099	4426.33	401.5	1.116527e+001	7.112095e+000	111	49	9.573166e+000	0	0	0	0	0	0	10.9501	1	0	57.5363	47.6429
DATA	2585	31	35	0	0	A_42_P764228	NM_031707	4451.61	401.594	5.884005e+003	5.884426e+002	5820	45.5	7.520776e+000	0	0	0	0	0	0	5753.49	1	1	47.5395	46.7
DATA	2586	31	36	0	0	A_64_P161621	NM_001101015	4476.94	401.537	3.552338e+002	3.621958e+001	460	52	1.064420e+001	0	0	0	0	0	0	346.245	1	1	45.835	52.0323
DATA	2587	31	37	0	0	A_42_P763522	NM_001013980	4502.21	401.931	3.488947e+003	3.489667e+002	3366.5	53	1.440996e+001	0	0	0	0	0	0	3389.36	1	1	46.8651	56.3056
DATA	2588	31	38	0	0	A_64_P029935	NM_001109299	4527.58	401.427	4.861232e+002	4.913050e+001	583.5	55	1.176025e+001	0	0	0	0	0	0	470.537	1	1	57.5363	53.8
DATA	2589	31	39	0	0	A_64_P045053	A_64_P045053	4553.3	401.933	1.749757e+002	1.889955e+001	267.5	52	8.295962e+000	0	0	0	0	0	0	168.734	1	1	43.7019	52.0667
DATA	2590	31	40	0	0	A_42_P540920	NM_001135045	4578.43	402.239	3.996339e+003	3.996982e+002	3832	56	9.250703e+000	0	0	0	0	0	0	3839.02	1	1	46.5243	54.963
DATA	2591	31	41	0	0	A_64_P055323	NM_001191930	4603.87	402.213	4.488518e+002	4.545901e+001	526	51	1.066410e+001	0	0	0	0	0	0	429.426	1	1	44.7812	51.1389
DATA	2592	31	42	0	0	A_64_P047162	NM_153472	4629.56	401.93	6.398616e+003	6.399025e+002	6107	54	1.256108e+001	0	0	0	0	0	0	6095.42	1	1	48.2044	52.6296
DATA	2593	31	43	0	0	A_64_P279594	NM_001170476	4654.58	401.573	1.448232e+001	7.405628e+000	117	50	7.662267e+000	0	0	0	0	0	0	13.7364	1	0	57.5363	50.3235
DATA	2594	31	44	0	0	A_42_P665509	NM_053777	4680.56	401.595	5.449475e+004	5.449480e+003	51197	50	1.186805e+001	0	0	0	0	0	0	51451.6	1	1	52.0157	50.4643
DATA	2595	31	45	0	0	A_64_P106638	NM_001108198	4705.56	402.177	1.102805e+002	1.324106e+001	202.5	52	1.108332e+001	0	0	0	0	0	0	103.66	1	1	43.7019	52.3929
DATA	2596	31	46	0	0	A_64_P141245	NM_001105920	4730.67	401.5	1.766412e+003	1.767946e+002	1727	50	9.165465e+000	0	0	0	0	0	0	1652.51	1	1	57.5363	50.8333
DATA	2597	31	47	0	0	A_42_P503739	FQ231471	4756.44	402.027	1.967657e+004	1.967671e+003	17619	48	9.526379e+000	0	0	0	0	0	0	18319.6	1	1	48.5334	47.7576
DATA	2598	31	48	0	0	A_44_P282433	NM_033230	4781.84	402.179	5.625998e+002	5.674913e+001	619.5	47.5	9.871677e+000	0	0	0	0	0	0	521.255	1	1	46.1809	49.75
DATA	2599	31	49	0	0	A_42_P585750	NM_001202463	4807	401.545	1.346288e+001	7.592620e+000	114	55	1.128840e+001	0	0	0	0	0	0	12.4112	1	0	55.8519	53.1935
DATA	2600	31	50	0	0	A_42_P523517	FQ229104	4832.86	402.172	9.950001e+003	9.950284e+002	8916.5	52	1.068515e+001	0	0	0	0	0	0	9126.63	1	1	45.4864	51.7857
DATA	2601	31	51	0	0	A_64_P126190	NM_001113789	4858.44	402.017	1.944683e+001	7.795269e+000	117	46	7.749022e+000	0	0	0	0	0	0	17.746	1	0	43.7019	47.8788
DATA	2602	31	52	0	0	A_42_P549675	NM_080577	4883.24	401.986	4.830698e+003	4.831294e+002	4255	48.5	8.057693e+000	0	0	0	0	0	0	4386.12	1	1	46.8651	47.9063
DATA	2603	31	53	0	0	A_42_P535644	NM_024400	4908.73	402.243	8.465820e+002	8.500098e+001	842	49	9.142609e+000	0	0	0	1	0	0	764.724	1	1	46.8651	47.5714
DATA	2604	31	54	0	0	A_64_P050233	XM_345239	4934	401.545	1.618215e+002	1.790625e+001	243	48	9.293429e+000	0	0	0	0	0	0	145.406	1	1	55.8519	48.6667
DATA	2605	31	55	0	0	A_64_P121575	NM_001013144	4959.42	401.573	3.737652e+001	8.564857e+000	133	46.5	6.011961e+000	0	0	0	0	0	0	33.4105	1	0	57.5363	46.8333
DATA	2606	31	56	0	0	A_64_P018263	NM_012728	4984.58	401.573	2.137563e+002	2.273588e+001	292	49	1.127289e+001	0	0	0	0	0	0	190.091	1	1	57.5363	47.7568
DATA	2607	31	57	0	0	A_64_P164682	TC600307	5010.5	402.273	1.212719e+004	1.212744e+003	11013	47.5	1.205954e+001	0	0	0	0	0	0	10728.8	1	1	46.5243	46.6071
DATA	2608	31	58	0	0	A_44_P1045612	NM_172317	5035.89	402.273	4.323611e+002	4.393883e+001	471	48	1.014273e+001	0	0	0	0	0	0	380.531	1	1	45.835	50
DATA	2609	31	59	0	0	A_42_P529514	NM_001008308	5061.09	402.328	5.490312e+002	5.546385e+001	575	46	1.095806e+001	0	0	0	0	0	0	480.761	1	1	45.1352	46.5429
DATA	2610	31	60	0	0	A_44_P870348	NM_001107522	5086.87	402.064	3.191727e+002	3.288233e+001	378	48	1.340117e+001	0	0	0	0	0	0	278.03	1	1	45.835	49.5357
DATA	2611	31	61	0	0	A_64_P108264	XM_223835	5111.58	401.573	8.338561e+001	1.151929e+001	178	48	1.426342e+001	0	0	0	0	0	0	72.2754	1	1	57.5363	50.6129
DATA	2612	31	62	0	0	A_42_P754784	CB328432	5137.43	402.232	8.938474e+003	8.938831e+002	7507	47.5	5.775991e+000	0	0	0	0	0	0	7709.28	1	1	46.8651	47.5
DATA	2613	31	63	0	0	A_64_P084525	NM_001101001	5162.43	402.299	3.257109e+003	3.258098e+002	2930	45	9.104648e+000	0	0	0	0	0	0	2795.74	1	1	46.1809	45.1935
DATA	2614	31	64	0	0	A_64_P378583	NM_001099516	5187.91	401.614	9.993747e+000	8.126779e+000	109	46	8.365094e+000	0	0	0	0	0	0	8.53587	1	0	57.259	46.2857
DATA	2615	31	65	0	0	A_64_P154172	NM_001000557	5213.5	401.648	8.140466e+000	8.103305e+000	80	44	9.260063e+000	0	0	0	0	0	0	-20.952	0	0	65	44.0345
DATA	2616	31	66	0	0	A_64_P074634	NM_001024287	5238.89	402.143	2.564191e+002	2.690284e+001	318	46	1.375185e+001	0	0	0	0	0	0	217.004	1	1	45.4864	47.6923
DATA	2617	31	67	1028	1	(+)E1A_r60_a22	E1A_r60_a22	5264.64	402.254	1.605233e+002	1.801474e+001	236	45	8.706320e+000	0	0	0	0	0	0	135.24	1	1	46.1809	45
DATA	2618	31	68	0	0	A_43_P12780	NM_053350	5289.91	402.328	7.922568e+001	1.141025e+001	164	43.5	7.816295e+000	0	0	0	0	0	0	66.4629	1	1	45.1352	43.7647
DATA	2619	31	69	0	0	A_44_P442169	NM_001013034	5315.32	402.012	4.221631e+003	4.222436e+002	3596	44	8.216558e+000	0	0	0	0	0	0	3526.65	1	1	49.1849	44.6129
DATA	2620	31	70	0	0	A_64_P093894	A_64_P093894	5340.5	402	3.390873e+001	8.946240e+000	118	45	8.529139e+000	0	0	0	0	0	0	28.2148	1	0	54.1152	46.6061
DATA	2621	31	71	0	0	A_64_P073378	NM_001025287	5365.93	402.2	1.129560e+003	1.132612e+002	1014	44	9.660025e+000	0	0	0	0	0	0	936.347	1	1	46.8651	44.8333
DATA	2622	31	72	0	0	A_64_P096076	A_64_P096076	5391.39	401.931	8.378838e+000	8.340589e+000	89.5	46	1.259802e+001	0	0	0	0	0	0	-8.05976	0	0	53.8203	47.9091
DATA	2623	31	73	0	0	A_42_P471835	TC610276	5416.84	401.897	4.530309e+003	4.531082e+002	3665	46.5	1.296609e+001	0	0	0	0	0	0	3728.85	1	1	46.5243	47.8667
DATA	2624	31	74	0	0	A_42_P767737	AY724480	5442.2	401.95	5.602628e+003	5.603257e+002	4641	43	8.354837e+000	0	0	0	0	0	0	4596.87	1	1	49.1849	45.4054
DATA	2625	31	75	0	0	A_64_P016393	A_64_P016393	5467.5	402	3.651832e+003	3.652803e+002	3115.5	47	1.273194e+001	0	0	0	0	0	0	2987.5	1	1	48.5334	49.3667
DATA	2626	31	76	0	0	A_42_P803752	XM_580093	5492.5	402	8.481574e+000	8.449352e+000	102	43	1.129449e+001	0	0	0	0	0	0	2.70265	0	0	54.1152	43.9677
DATA	2627	31	77	0	0	A_42_P589025	NM_134363	5518	402	6.699708e+004	6.699713e+003	54067	46	8.991472e+000	0	0	0	0	0	0	54529	1	1	54.9904	46.4286
DATA	2628	31	78	0	0	A_64_P107938	NM_001000930	5543.5	402	8.521044e+000	8.482146e+000	96.5	47	7.789246e+000	0	0	0	0	0	0	-2.41528	0	0	54.1152	44.7879
DATA	2629	31	79	0	0	A_64_P088817	A_64_P088817	5569.21	402.194	3.724670e+002	3.820384e+001	399.5	44	1.060052e+001	0	0	0	0	0	0	301.925	1	1	47.5395	45.375
DATA	2630	31	80	0	0	A_64_P000579	A_64_P000579	5594.5	402.265	2.107980e+004	2.107997e+003	16835.5	48	9.030327e+000	0	0	0	0	0	0	17060.8	1	1	46.5243	47.7586
DATA	2631	31	81	0	0	A_44_P570046	TC630334	5619.89	401.943	6.288106e+002	6.345598e+001	593	46.5	8.407291e+000	0	0	0	0	0	0	508.249	1	1	46.8651	47.3571
DATA	2632	31	82	0	0	A_44_P431629	NM_001106835	5645.09	402.065	1.191993e+002	1.465779e+001	194.5	41.5	9.357488e+000	0	0	0	0	0	0	96.2581	1	1	54.4085	42.2895
DATA	2634	31	84	0	0	A_42_P485932	NM_001034927	5696.21	402.194	1.889620e+004	1.889639e+003	14588	46	9.831343e+000	0	0	0	1	0	0	15247.2	1	1	47.5395	44.303
DATA	2635	31	85	66	1	DarkCorner	DarkCorner	5721.52	402.524	8.574505e+000	8.535363e+000	84.5	41	1.047548e+001	0	0	0	0	0	0	-6.31089	0	0	37.4241	43.4091
DATA	2636	32	1	66	1	DarkCorner	DarkCorner	3601.48	409.092	7.490006e+000	7.455815e+000	87.5	48.5	1.052375e+001	0	0	0	0	0	0	-15.6018	0	0	44.7812	48.84
DATA	2637	32	2	0	0	A_64_P048366	ENSRNOT00000059330	3626.77	408.901	1.544288e+003	1.546060e+002	1555	45	1.194026e+001	0	0	0	0	0	0	1437.57	1	1	46.8651	45.3548
DATA	2638	32	3	0	0	A_44_P1058980	NM_001012036	3651.71	409.167	3.404328e+003	3.405120e+002	3296	44	6.842135e+000	0	0	0	0	0	0	3191.57	1	1	45.835	43.2593
DATA	2639	32	4	0	0	A_64_P062562	ENSRNOT00000027655	3676.89	408.5	4.270642e+001	8.457009e+000	139	50	7.295947e+000	0	0	0	0	0	0	40.3023	1	1	56.9804	49.2647
DATA	2640	32	5	0	0	A_44_P490100	ENSRNOT00000043641	3702.15	409.092	2.257179e+001	7.596052e+000	126	45	9.312859e+000	0	0	0	0	0	0	21.4378	1	0	45.835	45.963
DATA	2641	32	6	0	0	A_42_P473886	NM_001165922	3727.58	408.427	3.994189e+002	4.058754e+001	479.5	47	1.000648e+001	0	0	0	0	0	0	381.578	1	1	57.5363	46.7692
DATA	2642	32	7	0	0	A_64_P393339	ENSRNOT00000057753	3753.33	408.5	1.786629e+001	7.389483e+000	122	46	7.378242e+000	0	0	0	0	0	0	17.1644	1	0	57.5363	45.85
DATA	2643	32	8	0	0	A_44_P461154	NM_053819	3778.71	409.106	3.970208e+002	4.033775e+001	486	42	5.895875e+000	0	0	0	0	0	0	383.417	1	1	45.835	42.0571
DATA	2644	32	9	0	0	A_42_P701991	NM_001100671	3804.16	409.179	4.447302e+003	4.447869e+002	4340	47.5	1.064163e+001	0	0	0	0	0	0	4315.4	1	1	46.1809	50.2941
DATA	2645	32	10	1028	1	(+)E1A_r60_1	E1A_r60_1	3829.65	408.903	7.100843e+000	7.068428e+000	101	46	9.847329e+000	0	0	0	0	0	0	-1.95327	0	0	44.4243	45.6452
DATA	2646	32	11	0	0	A_44_P541230	ENSRNOT00000010675	3854.94	409.031	2.513015e+003	2.514001e+002	2545	42.5	1.008742e+001	0	0	0	0	0	0	2458.82	1	1	46.8651	45.9737
DATA	2647	32	12	0	0	A_64_P004593	NM_001166761	3880.33	408.5	7.047722e+000	7.016030e+000	103	46	9.174041e+000	0	0	0	0	0	0	0.806117	0	0	57.5363	46.8857
DATA	2648	32	13	0	0	A_64_P018385	ENSRNOT00000063845	3905.79	408.75	7.024701e+000	7.007552e+000	108	48	1.137903e+001	0	0	0	0	0	0	4.50207	0	0	46.1809	48.6316
DATA	2649	32	14	0	0	A_64_P017590	NM_001000096	3930.89	408.5	7.004988e+000	6.973011e+000	79	46.5	1.260439e+001	0	0	0	0	0	0	-21.8349	0	0	56.9804	48.0882
DATA	2650	32	15	0	0	A_42_P810118	XM_001075984	3956.42	408.573	8.329603e+002	8.358592e+001	927	49	1.311520e+001	0	0	0	0	0	0	824.966	1	1	57.5363	51.1429
DATA	2651	32	16	0	0	A_42_P772157	NM_017020	3981.82	409.294	1.330687e+003	1.332495e+002	1433	47	1.043740e+001	0	0	0	0	0	0	1320.89	1	1	45.835	49.4615
DATA	2652	32	17	0	0	A_42_P542809	NM_021671	4007.16	409.302	8.588705e+002	8.616594e+001	942.5	49	1.110383e+001	0	0	0	0	0	0	854.1	1	1	45.1352	48.0357
DATA	2653	32	18	0	0	A_42_P645352	NM_001126371	4032.7	408.9	5.509326e+003	5.509760e+002	5549.5	47	9.474244e+000	0	0	0	0	0	0	5486.7	1	1	47.2035	48.1935
DATA	2654	32	19	0	0	A_64_P106933	NM_001130493	4057.89	408.5	6.941000e+000	6.940576e+000	107.5	45	1.028652e+001	0	0	0	0	0	0	6.56022	0	0	65	47
DATA	2655	32	20	0	0	A_42_P614175	NM_033237	4083.42	408.573	1.344361e+003	1.346132e+002	1408.5	46	4.731238e+000	0	0	0	0	0	0	1341.47	1	1	57.5363	45.6667
DATA	2656	32	21	0	0	A_64_P147190	NM_031840	4108.58	408.573	3.108834e+003	3.109600e+002	3185	49	1.120646e+001	0	0	0	0	0	0	3103.76	1	1	57.5363	49.3095
DATA	2657	32	22	0	0	A_43_P11268	NM_031762	4134.31	409.313	6.409156e+003	6.409527e+002	6512.5	47.5	1.128197e+001	0	0	0	0	0	0	6400.59	1	1	45.835	48.6
DATA	2658	32	23	0	0	A_64_P022215	A_64_P022215	4160	409.295	1.191964e+002	1.377193e+001	220	52	9.856992e+000	0	0	0	0	0	0	119.026	1	1	44.0646	51.5313
DATA	2659	32	24	0	0	A_64_P001080	NM_001109379	4184.67	408.5	1.291935e+002	1.464721e+001	227.5	45	9.802307e+000	0	0	0	0	0	0	128.951	1	1	57.5363	45.9091
DATA	2660	32	25	0	0	A_42_P468662	NM_001108886	4210.44	408.973	1.750437e+003	1.751799e+002	1795	45	8.221982e+000	0	0	0	0	0	0	1746.06	1	1	48.5334	45.3793
DATA	2661	32	26	0	0	A_42_P522285	NM_001044263	4235.86	409.188	5.134167e+002	5.180488e+001	609	44	1.001542e+001	0	0	0	0	0	0	511.66	1	1	45.4864	46.0606
DATA	2662	32	27	0	0	A_42_P478500	NM_177421	4261	408.545	1.506649e+005	1.506649e+004	149529	46	1.072394e+001	0	0	0	0	0	0	149959	1	1	55.8519	46.8148
DATA	2663	32	28	0	0	A_42_P739860	NM_133578	4286.45	409.323	3.100962e+003	3.101736e+002	3092.5	48.5	8.503143e+000	0	0	0	0	0	0	3082.12	1	1	45.1352	47.8
DATA	2664	32	29	0	0	A_42_P708614	NM_001130505	4311.58	408.573	5.922144e+004	5.922148e+003	58723	56	1.252033e+001	0	0	0	0	0	0	58756.2	1	1	57.5363	54.4828
DATA	2665	32	30	0	0	A_64_P067000	NM_001108721	4337.35	409.455	7.779654e+002	7.810694e+001	874	46.5	7.088441e+000	0	0	0	0	0	0	770.38	1	1	45.1352	46.2353
DATA	2666	32	31	0	0	A_44_P590748	NM_001109199	4363.18	409.324	8.142302e+001	1.071956e+001	183.5	45	1.076964e+001	0	0	0	0	0	0	80.4462	1	1	46.1809	46.5897
DATA	2667	32	32	0	0	A_42_P742797	NM_001106761	4388	409.424	4.375208e+003	4.375766e+002	4346	49	8.799491e+000	0	0	0	0	0	0	4312.43	1	1	45.4864	48.5
DATA	2668	32	33	0	0	A_42_P761277	NM_001008297	4413.56	409.028	1.019055e+003	1.021462e+002	1103	48	9.858788e+000	0	0	0	0	0	0	1001.69	1	1	48.2044	46.0645
DATA	2669	32	34	0	0	A_42_P503739	FQ231471	4439.03	408.873	1.980349e+004	1.980361e+003	19007	46	8.750092e+000	0	0	0	0	0	0	19409.5	1	1	46.8651	46.8889
DATA	2670	32	35	0	0	A_42_P635760	ENSRNOT00000023806	4464.3	409.333	1.020869e+004	1.020893e+003	9807	49	1.002030e+001	0	0	0	0	0	0	9975.38	1	1	44.4243	48.7778
DATA	2671	32	36	0	0	A_64_P136337	ENSRNOT00000064588	4489.65	409.2	5.483899e+003	5.484355e+002	5275	53	1.173910e+001	0	0	0	0	0	0	5340.95	1	1	45.4864	54.1613
DATA	2672	32	37	0	0	A_64_P128316	ENSRNOT00000062007	4515	408.545	7.130600e+000	7.106813e+000	105	55	1.607111e+001	0	0	0	0	0	0	3.42417	0	0	65	58.1143
DATA	2673	32	38	0	0	A_64_P050799	A_64_P050799	4540.55	409.375	1.134183e+002	1.339331e+001	211.5	52.5	1.064867e+001	0	0	0	0	0	0	109.678	1	1	45.1352	52.3438
DATA	2674	32	39	0	0	A_42_P701779	NM_001108048	4566	409.424	2.298906e+003	2.300018e+002	2242	49.5	9.995289e+000	0	0	0	0	0	0	2214.62	1	1	45.4864	50.5833
DATA	2675	32	40	0	0	A_42_P604900	NM_199117	4591.68	409.406	5.962995e+003	5.963428e+002	5648	55.5	1.244043e+001	0	0	0	0	0	0	5721.26	1	1	46.1809	54.8333
DATA	2676	32	41	0	0	A_44_P1060444	NM_001106644	4616.84	409.088	4.938539e+003	4.939065e+002	4591	48	1.188637e+001	0	0	0	0	0	0	4718.79	1	1	46.5243	48
DATA	2677	32	42	0	0	A_64_P090339	NM_001000756	4642	409	2.586492e+001	7.688160e+000	122	50	1.093977e+001	0	0	0	0	0	0	24.6094	1	0	65	49.75
DATA	2678	32	43	0	0	A_42_P770556	NM_033096	4667.64	409.13	8.038731e+003	8.039060e+002	7391	50.5	8.882697e+000	0	0	0	0	0	0	7614.71	1	1	46.8651	51.8333
DATA	2679	32	44	0	0	A_44_P606502	NM_001130502	4692.5	409	1.267291e+001	7.413686e+000	112.5	50	1.082881e+001	0	0	0	0	0	0	11.9512	1	0	54.1152	50.8214
DATA	2680	32	45	0	0	A_64_P372189	NM_212516	4718.39	408.931	5.938066e+004	5.938070e+003	55681.5	55	1.127638e+001	0	0	0	0	0	0	55734.3	1	1	53.8203	55.64
DATA	2681	32	46	0	0	A_42_P540518	NM_199399	4743.73	409.219	4.064749e+003	4.065418e+002	3693.5	49	7.757718e+000	0	0	0	0	0	0	3797.3	1	1	48.2044	47.7692
DATA	2682	32	47	0	0	A_64_P158955	ENSRNOT00000020260	4769	409	1.038958e+001	7.481995e+000	113.5	49	1.044366e+001	0	0	0	0	0	0	9.65912	1	0	54.9904	49.1515
DATA	2683	32	48	0	0	A_44_P325841	NM_024130	4794.5	409.258	1.545596e+003	1.547389e+002	1539	55	1.165919e+001	0	0	0	0	0	0	1429.91	1	1	46.5243	54.1667
DATA	2684	32	49	0	0	A_64_P007743	XM_001071416	4819.5	409	1.189476e+002	1.405266e+001	210.5	50.5	1.106945e+001	0	0	0	0	0	0	109.502	1	1	54.1152	51.8158
DATA	2685	32	50	0	0	A_64_P136213	A_64_P136213	4845.5	409	7.556017e+000	7.521524e+000	94.5	52	8.038654e+000	0	0	0	0	0	0	-3.95808	0	0	54.1152	51.6563
DATA	2686	32	51	0	0	A_43_P17392	NM_001191693	4870.93	409.214	2.721171e+003	2.722221e+002	2577.5	44.5	7.154213e+000	0	0	0	0	0	0	2479.57	1	1	46.8651	45.7
DATA	2687	32	52	0	0	A_42_P708569	NM_001191837	4896.29	409.246	9.579273e+003	9.579574e+002	8724	50	9.670224e+000	0	0	0	0	0	0	8684.17	1	1	45.1352	48.5714
DATA	2688	32	53	0	0	A_64_P062068	XM_002728030	4921.61	409.268	2.735156e+002	2.839795e+001	347	48.5	9.394679e+000	0	0	0	0	0	0	246.686	1	1	47.5395	48.5
[truncated: 6,320,802 more chars]
