# Supplementary material for: Gene Expression in the Hippocampus in a Rat Model of Premenstrual Dysphoric Disorder After Treatment With Baixiangdan Capsules
Source: Front Psychol. 2018 Nov 13;9:2065. doi: 10.3389/fpsyg.2018.02065 (PMC6242977; doi:10.3389/fpsyg.2018.02065)
Supplement: Supplementary file 2 [file Data_Sheet_2.ZIP › Raw Data Files/18_8.txt]

TYPE	text	text	text	integer	text	float	float	text	integer	text	text	integer	integer	integer	integer	float	float	float	float	float	float	text	text	text	text	text	text	text	text	text	text	text	integer	integer	integer	text	integer	boolean
FEPARAMS	Protocol_Name	Protocol_date	Scan_ScannerName	Scan_NumChannels	Scan_Date	Scan_MicronsPerPixelX	Scan_MicronsPerPixelY	Scan_OriginalGUID	Scan_NumScanPass	Grid_Name	Grid_Date	Grid_NumSubGridRows	Grid_NumSubGridCols	Grid_NumRows	Grid_NumCols	Grid_RowSpacing	Grid_ColSpacing	Grid_OffsetX	Grid_OffsetY	Grid_NomSpotWidth	Grid_NomSpotHeight	Grid_GenomicBuild	FeatureExtractor_Barcode	FeatureExtractor_Sample	FeatureExtractor_ScanFileName	FeatureExtractor_ArrayName	FeatureExtractor_ScanFileGUID	FeatureExtractor_DesignFileName	FeatureExtractor_ExtractionTime	FeatureExtractor_UserName	FeatureExtractor_ComputerName	FeatureExtractor_Version	FeatureExtractor_IsXDRExtraction	FeatureExtractor_ColorMode	FeatureExtractor_QCReportType	DyeNorm_NormFilename	DyeNorm_NormNumProbes	Grid_IsGridFile
DATA	GE1_1100_Jul11 (Read Only)	1-Jul-2011 22:30	Agilent Technologies Scanner G2505C US10450393	1	07-11-2013 11:28:19	5	5	8c21e7b3-da0c-49e9-bbfb-25825691cb4f	1	028282_D_F_20120224	24-Feb-2012 00:00	1	1	532	85	73.3235	63.5	0	36.6617	65	65	rn4:RGSCv3.4:Nov2004	1_4		M:\2013.07.11 Rat GE 1-color 4x44k(sunpeng)\\US10450393_S01.tif	US10450393_S01	713781a6-1ed3-4c46-9d98-6375925679d3	028282_D_F_20120224.xml	11-Jul-2013 15:13:54	admin	KCSY01	11.0.1.1	0	0	0		0	0
*
TYPE	float	float	float	integer	integer	float	float	float	integer	float	float	float	integer	float	float	integer	integer	integer	integer	integer	float	float	float	integer	float	float	float	float	float	integer	integer	float	float	float	float	float	integer	float	float	float	float	integer	float	float	float	float	float	integer	float	float	float	float	float	float	float	integer	float	integer	float	float	float	float	integer	float	float	float	float	text	float	float	float	float	float	float	float	float	float	float	float	float	float	float	float	float	float	float	float	float	float	integer	integer	integer	integer	float	integer	text	integer	text	float	float	float	integer	boolean	float	float	boolean	float	boolean	float	boolean	float	boolean	float	boolean	float	boolean	float	boolean	float	boolean	float	boolean	float	boolean	float	boolean
STATS	gDarkOffsetAverage	gDarkOffsetMedian	gDarkOffsetStdDev	gDarkOffsetNumPts	gSaturationValue	gAvgSig2BkgeQC	gAvgSig2BkgNegCtrl	gRatioSig2BkgeQC_NegCtrl	gNumSatFeat	gLocalBGInlierNetAve	gLocalBGInlierAve	gLocalBGInlierSDev	gLocalBGInlierNum	gGlobalBGInlierAve	gGlobalBGInlierSDev	gGlobalBGInlierNum	gNumFeatureNonUnifOL	gNumPopnOL	gNumNonUnifBGOL	gNumPopnBGOL	gOffsetUsed	gGlobalFeatInlierAve	gGlobalFeatInlierSDev	gGlobalFeatInlierNum	AnyColorPrcntFeatNonUnifOL	AnyColorPrcntBGNonUnifOL	AnyColorPrcntFeatPopnOL	AnyColorPrcntBGPopnOL	TotalPrcntFeatOL	gNumNegBGSubFeat	gNonCtrlNumNegFeatBGSubSig	gSpatialDetrendRMSFit	gSpatialDetrendRMSFilteredMinusFit	gSpatialDetrendSurfaceArea	gSpatialDetrendVolume	gSpatialDetrendAveFit	gNonCtrlNumSatFeat	gNonCtrl99PrcntNetSig	gNonCtrl50PrcntNetSig	gNonCtrl1PrcntNetSig	gNonCtrlMedPrcntCVBGSubSig	gCtrleQCNumSatFeat	gCtrleQC99PrcntNetSig	gCtrleQC50PrcntNetSig	gCtrleQC1PrcntNetSig	geQCMedPrcntCVBGSubSig	geQCSig2BkgLow2	gNegCtrlNumInliers	gNegCtrlAveNetSig	gNegCtrlSDevNetSig	gNegCtrlAveBGSubSig	gNegCtrlSDevBGSubSig	gAveNumPixOLLo	gAveNumPixOLHi	gPixCVofHighSignalFeat	gNumHighSignalFeat	AddErrorEstimateGreen	TotalNumFeatures	ROIHeight	ROIWidth	CentroidDiffX	CentroidDiffY	NumFoundFeat	MaxNonUnifEdges	MaxSpotNotFoundEdges	gMultDetrendRMSFit	gMultDetrendSurfaceAverage	eQCLowSigName2	eQCOneColorLogLowSignal	eQCOneColorLogLowSignalError	eQCOneColorLogHighSignal	eQCOneColorLinFitLogLowConc	eQCOneColorLinFitLogLowSignal	eQCOneColorLinFitLogHighConc	eQCOneColorLinFitLogHighSignal	eQCOneColorLinFitSlope	eQCOneColorLinFitIntercept	eQCOneColorLinFitRSQ	eQCOneColorSpikeDetectionLimit	gNonCtrl50PrcntBGSubSig	gCtrleQC50PrcntBGSubSig	gMedPrcntCVProcSignal	geQCMedPrcntCVProcSignal	gOutlierFlagger_Auto_FeatB_Term	gOutlierFlagger_Auto_FeatC_Term	gOutlierFlagger_Auto_BgndB_Term	gOutlierFlagger_Auto_BgndC_Term	OutlierFlagger_FeatChiSq	OutlierFlagger_BgndChiSq	GriddingStatus	IsGoodGrid	NumGeneNonUnifOL	TotalNumberOfReplicatedGenes	gPercentileIntensityProcessedSignal	ExtractionStatus	QCMetricResults	gNonCtrlNumWellAboveBG	ImageDepth	AFHold	gPMTVolts	GlassThickness	gDDN	GridHasBeenOptimized	gNegCtrlSpread	Metric_IsGoodGrid	Metric_IsGoodGrid_IsInRange	Metric_AnyColorPrcntFeatNonUnifOL	Metric_AnyColorPrcntFeatNonUnifOL_IsInRange	Metric_gNegCtrlAveNetSig	Metric_gNegCtrlAveNetSig_IsInRange	Metric_gNegCtrlAveBGSubSig	Metric_gNegCtrlAveBGSubSig_IsInRange	Metric_gNegCtrlSDevBGSubSig	Metric_gNegCtrlSDevBGSubSig_IsInRange	Metric_gSpatialDetrendRMSFilteredMinusFit	Metric_gSpatialDetrendRMSFilteredMinusFit_IsInRange	Metric_gNonCntrlMedCVProcSignal	Metric_gNonCntrlMedCVProcSignal_IsInRange	Metric_gE1aMedCVProcSignal	Metric_gE1aMedCVProcSignal_IsInRange	Metric_absGE1E1aSlope	Metric_absGE1E1aSlope_IsInRange	Metric_DetectionLimit	Metric_DetectionLimit_IsInRange	Metric_gDDN	Metric_gDDN_IsInRange
DATA	7.53866	7.53866	1.70843	0	778111	1.34848	1.21998	1.10534	0	56.4236	63.9622	5.77494	43229	63.9622	5.77494	43229	53	464	27	1024	7.53866	3948.55	11573.5	43751	0.119763	0.0610114	1.04849	2.31392	0.123609	1316	697	2.15119	3.77056	1.001	6.98963	82.7793	0	59221.2	436.011	72.8999	9.36048	0	216.461	88.6338	68.9958	-1	1.51585	152	67.7778	4.21522	-7.44325	4.03227	0.725878	1.10663	0.121273	4987	3.77056	44254	4.38262	7.61856	1.62714	1.07618	40523	0.0075188	0.135338	0.07883	1.00204	(+)E1A_r60_3	0	0	0	0	0	0	0	0	0	0	-1	360.61	12.7755	3.52776	-1	1441.59	196.971	178.425	116.961	1.95243	2.4259	0	1	32	30367	2701.08	1	ExtractionEvaluate	37474	20 Bit	0	354	976.824	0	1	12.4621	1	1	0.119763	1	67.7778	0	-7.44325	1	4.03227	1	3.77056	1	3.52776	1	-1	0	0	0	-1	0	0	1
*
TYPE	integer	integer	integer	integer	integer	text	text	float	float	float	float	float	float	float	boolean	boolean	boolean	boolean	boolean	boolean	float	boolean	boolean	float	float
FEATURES	FeatureNum	Row	Col	SubTypeMask	ControlType	ProbeName	SystematicName	PositionX	PositionY	gProcessedSignal	gProcessedSigError	gMedianSignal	gBGMedianSignal	gBGPixSDev	gIsSaturated	gIsFeatNonUnifOL	gIsBGNonUnifOL	gIsFeatPopnOL	gIsBGPopnOL	IsManualFlag	gBGSubSignal	gIsPosAndSignif	gIsWellAboveBG	SpotExtentX	gBGMeanSignal
DATA	1	1	1	260	1	GE_BrightCorner	GE_BrightCorner	9887.54	183.642	4.728773e+004	4.728774e+003	42101	48	1.033410e+001	0	0	0	1	0	0	42660.8	1	1	56.9804	48.7612
DATA	2	1	2	66	1	DarkCorner	DarkCorner	9912.4	183.543	4.175252e+000	4.161623e+000	83	49	1.226570e+001	0	0	0	0	0	0	0.533801	0	0	47.5395	51.0705
DATA	3	1	3	66	1	DarkCorner	DarkCorner	9938.5	183.5	4.156924e+000	4.142940e+000	81	51	1.237000e+001	0	0	0	0	0	0	-0.687815	0	0	57.5363	52.139
DATA	4	1	4	66	1	DarkCorner	DarkCorner	9963.89	183.5	4.588305e+000	4.151541e+000	84	53	1.171828e+001	0	0	0	0	0	0	4.19293	1	0	56.9804	53.648
DATA	5	1	5	66	1	DarkCorner	DarkCorner	9989.14	184.105	4.123800e+000	4.112812e+000	81	50	1.019190e+001	0	0	0	0	0	0	1.41297	0	0	47.8731	50.2717
DATA	6	1	6	66	1	DarkCorner	DarkCorner	10014.6	183.573	4.109108e+000	4.095285e+000	77	49	1.020324e+001	0	0	0	0	0	0	-1.37135	0	0	57.5363	48.8374
DATA	7	1	7	66	1	DarkCorner	DarkCorner	10040.1	183.612	4.094969e+000	4.081193e+000	77	49	9.853811e+000	0	0	0	0	0	0	-2.40509	0	0	39.0882	49.6525
DATA	8	1	8	66	1	DarkCorner	DarkCorner	10065.5	183.5	4.081875e+000	4.068143e+000	73	49	1.067456e+001	0	0	0	0	0	0	-7.5555	0	0	57.5363	49.6343
DATA	9	1	9	66	1	DarkCorner	DarkCorner	10091.3	183.786	4.069300e+000	4.055610e+000	75	49	9.960711e+000	0	0	0	0	0	0	-5.21319	0	0	51.4001	49.6518
DATA	10	1	10	66	1	DarkCorner	DarkCorner	10116.4	183.573	4.058236e+000	4.044584e+000	75	50	9.963542e+000	0	0	0	0	0	0	-6.70293	0	0	57.5363	50.384
DATA	11	1	11	66	1	DarkCorner	DarkCorner	10141.6	183.573	4.047916e+000	4.034298e+000	78.5	49	1.107342e+001	0	0	0	0	0	0	-2.20649	0	0	57.5363	50.2019
DATA	12	1	12	0	0	A_64_P076162	A_64_P076162	10166.4	183.724	4.731560e+001	6.211889e+000	127	50	1.081688e+001	0	0	0	0	0	0	44.3255	1	1	49.5074	50.0822
DATA	13	1	13	0	0	A_64_P002176	NM_001170551	10192	184.426	4.478169e+002	4.496139e+001	497	51	1.177625e+001	0	0	0	0	0	0	420.47	1	1	45.4864	52.1086
DATA	14	1	14	0	0	A_42_P664913	NM_001108400	10217.6	183.573	4.094410e+002	4.113985e+001	468.5	51	1.008867e+001	0	0	0	0	0	0	385.137	1	1	57.5363	51.1954
DATA	15	1	15	0	0	A_43_P13320	NM_138880	10242.3	183.88	6.807371e+000	4.059081e+000	87.5	50	1.060721e+001	0	0	0	0	0	0	6.41435	1	0	48.8603	51.167
DATA	16	1	16	0	0	A_64_P126523	A_64_P126523	10267.8	183.635	1.501767e+001	4.268580e+000	95	51	1.046771e+001	0	0	0	0	0	0	14.1716	1	0	41.0736	51.2644
DATA	17	1	17	0	0	A_64_P038045	XM_002730109	10294	183.545	4.174769e+001	5.775107e+000	121	51	1.061320e+001	0	0	0	0	0	0	39.4479	1	1	65	51.8835
DATA	18	1	18	0	0	A_43_P11804	NM_017066	10319.4	183.573	1.764229e+004	1.764234e+003	16144.5	51	1.094987e+001	0	0	0	0	0	0	16688.6	1	1	57.5363	51.2852
DATA	19	1	19	0	0	A_44_P808710	XM_001069205	10344.6	183.573	1.430723e+001	4.231751e+000	96	51	1.076038e+001	0	0	0	0	0	0	13.5456	1	0	57.5363	51.4788
DATA	20	1	20	0	0	A_64_P142111	NM_001100887	10369.8	184.297	6.964586e+002	6.975946e+001	747.5	52	1.103965e+001	0	0	0	0	0	0	659.902	1	1	45.1352	52.9209
DATA	21	1	21	0	0	A_64_P095642	A_64_P095642	10395.1	184.279	1.233364e+002	1.295916e+001	197	53	1.096834e+001	0	0	0	0	0	0	116.917	1	1	45.835	53.0713
DATA	22	1	22	0	0	A_42_P735279	NM_001004446	10421	183.545	2.078148e+004	2.078151e+003	18989	53	1.086198e+001	0	0	0	0	0	0	19703.1	1	1	55.8519	53.5583
DATA	23	1	23	0	0	A_44_P902822	XM_001063709	10446.4	183.573	3.556592e+001	5.335082e+000	117.5	53	1.050584e+001	0	0	0	0	0	0	33.7227	1	1	57.5363	54.3565
DATA	24	1	24	0	0	A_42_P563843	NM_022263	10471.6	183.573	1.235521e+001	4.164654e+000	88	53	1.149428e+001	0	0	0	1	0	0	11.7134	1	0	57.5363	54.023
DATA	25	1	25	0	0	A_42_P610788	NM_031544	10496.5	184	9.579479e+003	9.579561e+002	8892	55	1.204352e+001	0	0	0	0	0	0	9079.6	1	1	48.5334	55.841
DATA	26	1	26	0	0	A_44_P242429	NM_001134842	10521.4	184.081	2.884555e+003	2.884830e+002	2704	53	1.126558e+001	0	0	0	0	0	0	2732.7	1	1	48.8603	53.45
DATA	27	1	27	0	0	A_64_P020571	NM_001031659	10547.9	183.614	3.191307e+002	3.216070e+001	381	49	1.180418e+001	0	0	0	0	0	0	302.085	1	1	57.259	49.9649
DATA	28	1	28	0	0	A_42_P518462	NM_001007020	10572.6	184.134	7.425227e+003	7.425334e+002	6908	49.5	1.236159e+001	0	0	0	0	0	0	7023.11	1	1	45.835	50.498
DATA	29	1	29	0	0	A_42_P469751	XM_001054007	10598	184.055	3.444167e+003	3.444398e+002	3265.5	51	1.168938e+001	0	0	0	0	0	0	3254.11	1	1	46.8651	51.8643
DATA	30	1	30	0	0	A_44_P209459	NM_022387	10623.3	184.342	6.462949e+003	6.463072e+002	6092	47	1.314912e+001	0	0	0	0	0	0	6098.96	1	1	47.5395	48.5051
DATA	31	1	31	0	0	A_64_P018547	NM_001108717	10648.6	184.514	9.015098e+002	9.023973e+001	931	43	1.019487e+001	0	0	0	0	1	0	849.549	1	1	46.8651	43.4912
DATA	32	1	32	0	0	A_64_P111513	A_64_P111513	10675.4	183.959	1.775441e+002	1.820126e+001	223	42	9.680059e+000	0	0	0	0	1	0	167.011	1	1	39.0882	42.7402
DATA	33	1	33	0	0	A_42_P493925	NM_198785	10700.4	183.573	5.215676e+002	5.231112e+001	576	41	9.931368e+000	0	0	0	0	1	0	489.73	1	1	57.5363	42.3431
DATA	34	1	34	0	0	A_64_P049828	NM_012543	10725.4	184.265	1.376929e+003	1.377517e+002	1377	49	1.240963e+001	0	0	0	0	0	0	1290.56	1	1	46.5243	48.9682
DATA	35	1	35	0	0	A_64_P137927	NM_001191885	10750.2	184.265	2.052029e+002	2.091251e+001	280	50	1.141740e+001	0	0	0	0	0	0	191.935	1	1	46.1809	51.0927
DATA	36	1	36	0	0	A_43_P19848	NM_001106018	10776.5	183.648	8.749487e+001	9.637651e+000	163	49	1.193807e+001	0	0	0	0	0	0	81.6365	1	1	57.5363	50.0521
DATA	37	1	37	0	0	A_44_P308673	NM_139108	10801.1	184.013	3.115284e+002	3.141505e+001	374.5	48	1.251707e+001	0	0	0	0	0	0	290.006	1	1	47.5395	50.1297
DATA	38	1	38	0	0	A_64_P004269	NM_001191660	10826.5	184.12	2.549412e+003	2.549735e+002	2421	67	4.161808e+001	0	0	0	0	1	0	2367.22	1	1	48.8603	84.7083
DATA	39	1	39	0	0	A_42_P543670	NM_012572	10852.5	184	2.477479e+002	2.510722e+001	302	97	3.754045e+001	0	0	0	0	1	0	229.399	1	1	54.1152	101.056
DATA	40	1	40	0	0	A_64_P164696	TC605704	10878	184	5.997338e+000	4.127679e+000	86.5	75	1.934528e+001	0	0	0	0	0	0	5.53722	1	0	54.9904	78.6718
DATA	41	1	41	0	0	A_64_P055763	NM_001191822	10902.7	184	1.163502e+004	1.163510e+003	10275	88	2.994650e+001	0	0	0	0	1	0	10711.1	1	1	50.4627	94.157
DATA	42	1	42	0	0	A_64_P068622	NM_001013056	10928	184.1	1.521374e+003	1.521929e+002	1488.5	97	3.125835e+001	0	0	0	0	1	0	1396.24	1	1	46.8651	101.614
DATA	43	1	43	0	0	A_44_P915877	XM_001065403	10954.5	184	2.918872e+002	2.947841e+001	350	69	2.330693e+001	0	0	0	0	0	0	266.965	1	1	54.1152	73.0099
DATA	44	1	44	0	0	A_42_P647599	NM_024129	10978.8	184.114	1.133344e+003	1.134098e+002	1142	60.5	1.436522e+001	0	0	0	0	0	0	1033.25	1	1	46.8651	62.373
DATA	45	1	45	0	0	A_42_P798776	XM_002725203	11004.4	184.116	5.331347e+003	5.331509e+002	4931	75	3.423864e+001	0	0	0	0	1	0	4843.44	1	1	50.1463	84.2027
DATA	46	1	46	0	0	A_42_P781735	NM_053319	11030.5	184	9.041499e+004	9.041500e+003	81721	114	3.700887e+001	0	0	0	0	1	0	81835.5	1	1	54.1152	114.124
DATA	47	1	47	0	0	A_42_P553611	TC630296	11055.5	184	4.980346e+003	4.980521e+002	4254.5	74	3.345024e+001	0	0	0	0	1	0	4491.35	1	1	54.1152	83.1467
DATA	48	1	48	0	0	A_43_P12729	NM_032615	11080.3	184.219	4.369423e+003	4.369625e+002	3865	54	1.200543e+001	0	0	0	0	0	0	3926	1	1	48.2044	54.489
DATA	49	1	49	0	0	A_42_P507072	FQ213070	11105.8	184.103	4.731105e+003	4.731292e+002	4175	52	1.135092e+001	0	0	0	0	0	0	4234.26	1	1	46.5243	53.0967
DATA	50	1	50	0	0	A_42_P645467	NM_001108804	11131.7	184.173	4.474017e+001	6.157124e+000	120	52	1.164895e+001	0	0	0	0	0	0	39.8802	1	1	48.5334	53.5873
DATA	51	1	51	0	0	A_42_P738431	NM_019175	11156.6	184.092	2.153199e+003	2.153618e+002	1855	51	1.026787e+001	0	0	0	0	0	0	1911.67	1	1	49.1849	51.6818
DATA	52	1	52	0	0	A_42_P712297	NM_001135583	11182	184.203	3.102468e+003	3.102762e+002	2759	49	1.129518e+001	0	0	0	0	0	0	2743.17	1	1	46.8651	49.7602
DATA	53	1	53	0	0	A_42_P657538	NM_001008362	11207.1	184.214	3.743249e+003	3.743494e+002	3267	49	1.094491e+001	0	0	0	0	0	0	3296.07	1	1	46.8651	50.3903
DATA	54	1	54	0	0	A_42_P515405	NM_212505	11232.7	184.343	6.824704e+002	6.838239e+001	670.5	52	1.082315e+001	0	0	0	0	0	0	598.382	1	1	46.8651	52.6711
DATA	55	1	55	0	0	A_64_P089886	NM_053476	11257.9	184.351	3.825535e+003	3.825779e+002	3278	53	1.132362e+001	0	0	0	0	0	0	3339.93	1	1	47.8731	53.3643
DATA	56	1	56	0	0	A_42_P528580	NM_001107528	11283.6	184.357	6.410615e+003	6.410761e+002	5500	52	1.140507e+001	0	0	0	0	0	0	5572.28	1	1	47.2035	52.5039
DATA	57	1	57	0	0	A_43_P14285	NM_001034145	11308.8	184.097	1.057336e+004	1.057345e+003	8942.5	53	1.155758e+001	0	0	0	0	0	0	9150.16	1	1	46.8651	54.0822
DATA	58	1	58	0	0	A_42_P616287	NM_001134555	11334.4	184.103	2.975275e+002	3.007290e+001	334.5	55	1.205798e+001	0	0	0	0	0	0	256.338	1	1	49.5074	56.3327
DATA	59	1	59	0	0	A_42_P496411	NM_001109410	11359.9	184.309	4.933201e+003	4.933397e+002	4133	56	1.270102e+001	0	0	0	0	0	0	4231.58	1	1	45.835	57.0663
DATA	60	1	60	0	0	A_44_P494310	NM_001009604	11385.1	184.214	6.541023e+003	6.541172e+002	5455	52	1.174006e+001	0	0	0	0	0	0	5585.89	1	1	46.8651	52.9723
DATA	61	1	61	0	0	A_42_P645142	NM_019375	11410.6	184.208	6.447968e+002	6.463203e+001	629	52	1.142303e+001	0	0	0	1	0	0	548.184	1	1	49.1849	52.6329
DATA	62	1	62	0	0	A_64_P042132	AABR03024196	11436.1	184.582	1.324247e+004	1.324255e+003	11277	51	1.234366e+001	0	0	0	0	0	0	11208.9	1	1	46.1809	52.9115
DATA	63	1	63	0	0	A_42_P508085	NM_001009620	11461.1	184.61	3.778443e+003	3.778708e+002	3086	49	1.112910e+001	0	0	0	0	0	0	3184.25	1	1	49.8279	50.1206
DATA	64	1	64	0	0	A_64_P051159	NM_001100684	11487.1	184.733	1.368205e+003	1.368943e+002	1229.5	50	1.083043e+001	0	0	0	0	0	0	1147.87	1	1	52.3208	50.485
DATA	65	1	65	0	0	A_64_P124041	ENSRNOT00000019667	11512	184.577	1.017259e+002	1.112910e+001	165.5	48	1.088765e+001	0	0	0	0	0	0	84.9738	1	1	49.1849	49.7461
DATA	66	1	66	0	0	A_64_P131122	XR_086302	11537.6	184.247	9.816485e+001	1.081305e+001	163.5	49	1.125179e+001	0	0	0	0	0	0	81.6328	1	1	49.8279	49.8392
DATA	67	1	67	0	0	A_64_P021601	NM_031737	11562.6	184.554	3.745671e+002	3.773242e+001	376.5	49	1.018090e+001	0	0	0	0	0	0	310.191	1	1	49.1849	49.9266
DATA	68	1	68	0	0	A_44_P776423	NM_001017386	11588.2	184.595	7.905628e+003	7.905760e+002	6267	49	1.042300e+001	0	0	0	0	0	0	6518.88	1	1	49.1849	49.5243
DATA	69	1	69	0	0	A_64_P120445	NM_080694	11613.8	184.463	4.670221e+001	6.549747e+000	119	50	1.047661e+001	0	0	0	0	0	0	38.3463	1	1	50.7771	50.8028
DATA	70	1	70	0	0	A_42_P772878	NM_001011936	11638.9	184.5	4.073849e+003	4.074110e+002	3298.5	50	1.047505e+001	0	0	0	0	0	0	3331.38	1	1	49.8279	50.9116
DATA	71	1	71	0	0	A_42_P736315	NM_001108321	11664.7	184.697	8.373332e+002	8.386121e+001	729.5	50	1.086082e+001	0	0	0	0	0	0	681.944	1	1	49.5074	50.3864
DATA	73	1	73	0	0	A_64_P041004	NM_001108599	11715.2	184.368	3.060156e+004	3.060160e+003	23812	54	1.332002e+001	0	0	0	0	0	0	24728.4	1	1	49.5074	55.5264
DATA	74	1	74	0	0	A_42_P494276	NM_001109663	11740.6	184.608	7.510494e+002	7.525081e+001	676.5	57	1.213999e+001	0	0	0	0	0	0	604.676	1	1	49.1849	57.5107
DATA	75	1	75	66	1	DarkCorner	DarkCorner	11766.6	184.427	8.130558e+000	4.770665e+000	89	67	1.938568e+001	0	0	0	0	0	0	6.52151	1	0	57.5363	69.7062
DATA	76	1	76	66	1	DarkCorner	DarkCorner	11792.4	184.427	4.733462e+000	4.717643e+000	81.5	66	1.924162e+001	0	0	0	0	0	0	0.25124	0	0	57.5363	68.651
DATA	77	1	77	66	1	DarkCorner	DarkCorner	11817.5	184.352	4.749167e+000	4.733190e+000	78.5	69.5	2.415911e+001	0	0	0	0	0	0	-0.550092	0	0	57.5363	74.6908
DATA	78	1	78	66	1	DarkCorner	DarkCorner	11842.9	184.477	4.764193e+000	4.759463e+000	84	67	2.032338e+001	0	0	0	0	0	0	2.60255	0	0	65	70.4969
DATA	79	1	79	66	1	DarkCorner	DarkCorner	11868.4	184.427	8.087975e+000	4.830803e+000	85	60	1.539849e+001	0	0	0	0	0	0	6.40324	1	0	57.5363	61.9632
DATA	80	1	80	66	1	DarkCorner	DarkCorner	11893.6	184.977	5.332132e+000	4.805110e+000	84	65	2.173931e+001	0	0	0	0	0	0	4.21011	1	0	51.4001	69.2351
DATA	81	1	81	66	1	DarkCorner	DarkCorner	11918.3	183.711	4.805395e+000	4.801403e+000	82	54	1.175257e+001	0	0	0	0	0	0	2.69011	0	0	48.5334	53.7768
DATA	82	1	82	66	1	DarkCorner	DarkCorner	11944.4	184.294	5.277297e+000	4.829644e+000	86	50	1.015039e+001	0	0	0	0	0	0	4.14487	1	0	46.8651	50.6466
DATA	83	1	83	66	1	DarkCorner	DarkCorner	11969.2	184.289	4.827514e+000	4.834660e+000	83	51	1.088187e+001	0	0	0	0	0	0	3.72218	0	0	49.5074	51.635
DATA	84	1	84	260	1	GE_BrightCorner	GE_BrightCorner	11995.4	184.427	4.965182e+004	4.965185e+003	38549.5	51	1.084240e+001	0	0	0	0	0	0	38831.5	1	1	57.5363	51.8781
DATA	85	1	85	260	1	GE_BrightCorner	GE_BrightCorner	12020.6	184.427	4.831994e+004	4.831997e+003	37324	50	1.055245e+001	0	0	0	0	0	0	37722.7	1	1	57.5363	50.0149
DATA	86	2	1	260	1	GE_BrightCorner	GE_BrightCorner	9900.5	191	4.721376e+004	4.721378e+003	41770	49	1.217021e+001	0	0	0	1	0	0	42742.2	1	1	54.1152	51.8134
DATA	87	2	2	66	1	DarkCorner	DarkCorner	9925.5	191	4.161090e+000	4.147092e+000	80	52	1.432875e+001	0	0	0	0	0	0	-1.17633	0	0	54.1152	53.4366
DATA	88	2	3	66	1	DarkCorner	DarkCorner	9949.97	190.928	4.144424e+000	4.137867e+000	84	54	1.248627e+001	0	0	0	0	0	0	2.25575	0	0	46.8651	54.7653
DATA	89	2	4	66	1	DarkCorner	DarkCorner	9976.7	191.358	4.126904e+000	4.113021e+000	71.5	52	1.101868e+001	0	0	0	0	0	0	-7.03409	0	0	41.4593	52.8498
DATA	90	2	5	66	1	DarkCorner	DarkCorner	10000.9	191.457	4.112108e+000	4.098275e+000	81	50	1.001347e+001	0	0	0	0	0	0	-0.660531	0	0	46.8651	49.7833
DATA	91	2	6	66	1	DarkCorner	DarkCorner	10027.5	191	4.097210e+000	4.083426e+000	77	50	1.018640e+001	0	0	0	0	0	0	-3.35888	0	0	54.1152	50.0376
DATA	92	2	7	66	1	DarkCorner	DarkCorner	10052.5	190.931	4.083874e+000	4.070136e+000	78.5	50	9.941238e+000	0	0	0	0	0	0	-5.33906	0	0	48.2044	50.0146
DATA	93	2	8	66	1	DarkCorner	DarkCorner	10078.5	191	4.070889e+000	4.057195e+000	72	51	9.775570e+000	0	0	0	0	0	0	-3.71289	0	0	54.1152	51.402
DATA	94	2	9	66	1	DarkCorner	DarkCorner	10103.5	191	4.059328e+000	4.045672e+000	72	49	9.839024e+000	0	0	0	0	0	0	-6.19232	0	0	54.1152	49.3218
DATA	95	2	10	66	1	DarkCorner	DarkCorner	10129	191	4.048434e+000	4.034815e+000	79	50	1.108772e+001	0	0	0	0	0	0	-1.06577	0	0	54.9904	51.8081
DATA	96	2	11	0	0	A_44_P212746	ENSRNOT00000049707	10154.5	191	1.715715e+001	4.375285e+000	97.5	49	1.175817e+001	0	0	0	0	0	0	16.0732	1	0	54.1152	50.8382
DATA	97	2	12	0	0	A_64_P103615	NM_001107179	10179.1	191.029	1.776523e+002	1.821352e+001	247	52	1.072005e+001	0	0	0	0	0	0	166.792	1	1	46.8651	52.2275
DATA	98	2	13	0	0	A_44_P550697	NM_001106400	10204.4	191.338	3.371610e+002	3.395345e+001	397	51	1.033047e+001	0	0	0	0	0	0	317.21	1	1	47.8731	51.9417
DATA	99	2	14	0	0	A_64_P045429	A_64_P045429	10230.3	191.377	7.003795e+001	8.065665e+000	146	51	1.041596e+001	0	0	0	0	0	0	66.0168	1	1	48.8603	51.6863
DATA	100	2	15	0	0	A_64_P075175	ENSRNOT00000044322	10255.5	191.386	2.210410e+002	2.246201e+001	288	51	1.005141e+001	0	0	0	0	0	0	208.685	1	1	46.8651	51.565
DATA	101	2	16	0	0	A_44_P472801	NM_173121	10280.4	191.465	3.341566e+003	3.341804e+002	3034	52	1.098664e+001	0	0	0	0	0	0	3159.19	1	1	47.2035	53.2488
DATA	102	2	17	0	0	A_42_P491486	NM_022533	10305.8	191.194	4.899419e+003	4.899581e+002	4447.5	52	1.030594e+001	0	0	0	0	0	0	4637.39	1	1	47.5395	52.4762
DATA	103	2	18	0	0	A_43_P12736	NM_033299	10332.1	191.065	1.037434e+002	1.111144e+001	183	52	1.144358e+001	0	0	0	0	0	0	98.294	1	1	54.4085	52.7048
DATA	104	2	19	0	0	A_64_P158790	A_64_P158790	10357.5	191	4.072848e+004	4.072850e+003	39284	52	9.935771e+000	0	0	0	0	0	0	38618.9	1	1	54.1152	51.9907
DATA	105	2	20	0	0	A_44_P229481	NM_001191077	10382.2	191.136	1.862490e+002	1.904419e+001	258.5	52.5	1.220204e+001	0	0	0	0	0	0	176.705	1	1	46.1809	53.3235
DATA	106	2	21	0	0	A_64_P133836	ENSRNOT00000039319	10408.5	191	9.578171e+000	4.086565e+000	91.5	53	1.097945e+001	0	0	0	0	0	0	9.09074	1	0	54.1152	53.0457
DATA	107	2	22	0	0	A_43_P13137	NM_130818	10433	191.275	1.569075e+001	4.270580e+000	97	54	1.043625e+001	0	0	0	0	0	0	14.8954	1	0	48.8603	54.9706
DATA	108	2	23	0	0	A_42_P586141	NM_017035	10458.4	191.188	4.006890e+002	4.026529e+001	455	52	1.121399e+001	0	0	0	0	0	0	380.367	1	1	49.5074	54.0796
DATA	109	2	24	0	0	A_44_P142850	NM_001106975	10483.8	191.8	7.009364e+001	8.056782e+000	148	55	1.256296e+001	0	0	0	0	0	0	66.5309	1	1	45.4864	57.0622
DATA	110	2	25	0	0	A_44_P1042504	NM_001044232	10509.6	191.427	1.784515e+002	1.828237e+001	256	56	1.162223e+001	0	0	0	0	0	0	169.301	1	1	65	56.4235
DATA	111	2	26	0	0	A_42_P476474	NM_001033926	10534.6	191.342	6.073777e+003	6.073907e+002	5706	52	1.094619e+001	0	0	0	0	0	0	5758.83	1	1	48.2044	53.4466
DATA	112	2	27	0	0	A_44_P480882	ENSRNOT00000035496	10560.5	191.352	1.111548e+001	4.132270e+000	92	51	1.257986e+001	0	0	0	0	0	0	10.5306	1	0	57.5363	52.104
DATA	113	2	28	0	0	A_44_P1042696	NM_001106377	10585.4	191.483	6.704142e+003	6.704261e+002	6409	53	1.101457e+001	0	0	0	0	0	0	6345.47	1	1	52.9257	54.3198
DATA	114	2	29	0	0	A_64_P132576	NM_001012357	10611.5	191.352	4.040117e+002	4.059757e+001	459	51	1.430860e+001	0	0	0	0	0	0	381.934	1	1	57.5363	52.4118
DATA	115	2	30	0	0	A_42_P652357	NM_021868	10636.6	191.427	2.901154e+004	2.901157e+003	26617	47	1.266728e+001	0	0	0	0	0	0	27390.3	1	1	57.5363	48.1435
DATA	116	2	31	0	0	A_64_P134935	NM_001107976	10662.4	191.427	3.806912e+001	5.521934e+000	114.5	44	9.704544e+000	0	0	0	0	1	0	35.8864	1	1	57.5363	44.4083
DATA	117	2	32	0	0	A_64_P034019	NM_001107145	10687.5	191.352	1.175656e+002	1.242053e+001	188	43	1.001936e+001	0	0	0	0	1	0	110.639	1	1	57.5363	43.3654
DATA	118	2	33	0	0	A_64_P140634	A_64_P140634	10712.5	191.471	2.537312e+003	2.537629e+002	2506	45	1.185591e+001	0	0	0	0	1	0	2383.51	1	1	46.8651	45.9837
DATA	120	2	35	0	0	A_42_P746029	NM_144748	10763.6	191.427	2.423544e+001	4.703337e+000	104	53	1.250916e+001	0	0	0	0	0	0	22.6704	1	1	57.5363	53.0502
DATA	121	2	36	0	0	A_64_P009032	NM_001105801	10789.4	191.427	3.525220e+004	3.525222e+003	32464	48	1.264833e+001	0	0	0	0	0	0	32897.4	1	1	57.5363	50.0952
DATA	122	2	37	0	0	A_42_P764792	NM_001014036	10814.2	191.558	4.136167e+002	4.155949e+001	461	54	1.475730e+001	0	0	0	0	0	0	385.063	1	1	50.1463	53.2732
DATA	123	2	38	0	0	A_64_P029278	NM_001108687	10839.3	191.731	4.995073e+002	5.011551e+001	531	126	3.695044e+001	0	0	0	0	1	0	463.829	1	1	50.1463	125.816
DATA	124	2	39	0	0	A_43_P12266	NM_022622	10864.1	192.301	6.180038e+001	7.400519e+000	140	74	1.663895e+001	0	0	0	0	0	0	57.2364	1	1	49.5074	77.0863
DATA	125	2	40	0	0	A_44_P204710	ENSRNOT00000049315	10890.6	191.427	2.979955e+001	5.055812e+000	107	72	1.903047e+001	0	0	0	0	0	0	27.5108	1	1	65	73.9431
DATA	126	2	41	0	0	A_64_P163837	NM_001013149	10916.1	191.5	1.662758e+002	1.712482e+001	233	90	3.178355e+001	0	0	0	0	1	0	153.037	1	1	56.9804	96.5071
DATA	127	2	42	0	0	A_64_P016202	XM_001080153	10941.5	191.352	4.123775e+000	4.110327e+000	86	79	2.112343e+001	0	0	0	0	1	0	0.541685	0	0	57.5363	82.8309
DATA	128	2	43	0	0	A_64_P137168	NM_053912	10965.9	191.388	9.202716e+003	9.202808e+002	8010	63	1.880325e+001	0	0	0	0	0	0	8416.24	1	1	46.5243	67.34
DATA	129	2	44	0	0	A_42_P830598	XM_001063895	10991.8	191.452	8.698045e+002	8.707879e+001	832	58	1.550738e+001	0	0	0	0	0	0	792.702	1	1	47.8731	60.798
DATA	130	2	45	0	0	A_42_P525886	NM_001105716	11017.6	191.427	3.916990e+002	3.938936e+001	436.5	116	3.572665e+001	0	0	0	0	1	0	355.701	1	1	65	117.205
DATA	131	2	46	0	0	A_42_P836392	NM_134383	11042.3	191.701	8.784396e+003	8.784495e+002	7689	94	3.918809e+001	0	0	0	0	1	0	7949.33	1	1	49.8279	101.687
DATA	132	2	47	0	0	A_44_P146783	NM_001001366	11068.4	191.427	4.149041e+001	5.891647e+000	117	55	1.219659e+001	0	0	0	0	0	0	37.4001	1	1	57.5363	56.7194
DATA	133	2	48	0	0	A_44_P294675	NM_053687	11093.7	191.795	6.626866e+001	7.844996e+000	139	51	1.048357e+001	0	0	0	0	0	0	59.5121	1	1	49.8279	51.6931
DATA	134	2	49	0	0	A_64_P047137	NM_001001283	11119.2	191.452	1.755163e+001	4.566250e+000	95	52	1.147728e+001	0	0	0	0	0	0	15.6993	1	0	47.8731	53.1058
DATA	135	2	50	0	0	A_44_P170396	NM_017267	11144.6	191.427	1.996580e+001	4.679708e+000	97	53.5	1.225514e+001	0	0	0	0	0	0	17.7871	1	0	57.5363	55.45
DATA	136	2	51	0	0	A_64_P077603	ENSRNOT00000037503	11170	191.455	1.178418e+002	1.252705e+001	187	51	1.129216e+001	0	0	0	0	0	0	104.555	1	1	55.8519	52.1651
DATA	137	2	52	0	0	A_42_P648800	AA998304	11195.4	191.427	2.275278e+002	2.314951e+001	285.5	52.5	1.221661e+001	0	0	0	0	0	0	201.036	1	1	57.5363	52.9439
DATA	138	2	53	0	0	A_64_P143186	A_64_P143186	11220	191.759	5.899656e+001	7.291336e+000	131	51.5	1.029856e+001	0	0	0	0	0	0	51.9187	1	1	49.5074	52.0429
DATA	139	2	54	0	0	A_42_P622681	NM_001030020	11245.5	191.671	4.142101e+003	4.142324e+002	3595	54	1.096829e+001	0	0	0	1	0	0	3629.52	1	1	49.8279	53.945
DATA	140	2	55	0	0	A_42_P506076	NM_019253	11270.8	191.935	2.615409e+004	2.615412e+003	22255.5	54	1.183454e+001	0	0	0	0	0	0	22820.7	1	1	49.5074	54.6143
DATA	141	2	56	0	0	A_64_P158975	NM_001109536	11297	191.455	1.285883e+002	1.357187e+001	191	53	1.050192e+001	0	0	0	0	0	0	111.685	1	1	65	53.9073
DATA	142	2	57	0	0	A_42_P655425	NM_001106406	11321.9	191.618	8.234649e+002	8.246182e+001	790	57	1.125697e+001	0	0	0	0	0	0	712.168	1	1	46.1809	57.8756
DATA	143	2	58	0	0	A_44_P408520	NM_031569	11347.2	191.583	1.709797e+002	1.764984e+001	227	57	1.264414e+001	0	0	0	1	0	0	147.221	1	1	47.8731	57.4952
DATA	144	2	59	0	0	A_64_P031259	NM_001002022	11373.3	191.5	1.698766e+002	1.754802e+001	224	58.5	1.388383e+001	0	0	0	0	0	0	145.604	1	1	57.5363	60.3894
DATA	145	2	60	0	0	A_43_P10227	NM_024397	11397.5	191.922	1.116792e+004	1.116801e+003	9326	49	9.801661e+000	0	0	0	0	0	0	9532.65	1	1	44.0646	50.6134
DATA	146	2	61	0	0	A_42_P542744	NM_001107544	11423.4	191.831	7.563127e+003	7.563257e+002	6283	57	1.411288e+001	0	0	0	1	0	0	6426.35	1	1	47.5395	58.9349
DATA	147	2	62	0	0	A_64_P052387	A_64_P052387	11449.5	191.5	7.943639e+001	9.109144e+000	149	50	1.244096e+001	0	0	0	0	0	0	67.1847	1	1	57.5363	51.8969
DATA	149	2	64	0	0	A_64_P064823	ENSRNOT00000050238	11499.4	191.868	3.608697e+002	3.636605e+001	387.5	50	1.103793e+001	0	0	0	0	0	0	302.6	1	1	49.5074	51.1347
DATA	150	2	65	0	0	A_42_P730292	NM_001004244	11524.9	191.819	2.363198e+003	2.363629e+002	2037.5	50	1.121310e+001	0	0	0	0	0	0	1972.92	1	1	46.8651	51.6863
DATA	151	2	66	0	0	A_64_P052878	FM104687	11550.3	191.941	4.794152e+002	4.815562e+001	475	50	1.146437e+001	0	0	0	0	0	0	398.519	1	1	45.835	51.8856
DATA	152	2	67	0	0	A_64_P157171	XM_001063008	11576.4	191.573	1.617667e+003	1.618309e+002	1424	50	9.927137e+000	0	0	0	0	0	0	1338.69	1	1	57.5363	50.7767
DATA	153	2	68	0	0	A_44_P693350	ENSRNOT00000030985	11601.3	191.677	2.779699e+001	5.353329e+000	103	50	1.070334e+001	0	0	0	0	0	0	22.9089	1	1	45.1352	50.3839
DATA	154	2	69	0	0	A_64_P090168	NM_001000720	11627.1	191.5	4.609588e+001	6.508389e+000	119	52	1.028544e+001	0	0	0	0	0	0	37.8282	1	1	56.9804	51.4878
DATA	155	2	70	0	0	A_42_P726392	NM_001106353	11651.7	192.318	1.677170e+003	1.677804e+002	1412	51	1.202352e+001	0	0	0	0	0	0	1371.19	1	1	45.835	52.731
DATA	156	2	71	0	0	A_64_P015727	FQ218047	11677.4	192.265	3.767043e+003	3.767328e+002	3082	51	1.191343e+001	0	0	0	0	0	0	3067.35	1	1	46.5243	51.8283
DATA	157	2	72	0	0	A_44_P897023	NM_001008364	11703.4	191.573	8.790312e+002	8.802602e+001	799	55	1.291635e+001	0	0	0	0	0	0	712.79	1	1	65	55.8308
DATA	158	2	73	0	0	A_44_P104776	NM_001001425	11727.6	192.016	6.327482e+001	7.862022e+000	129	60.5	1.312607e+001	0	0	0	0	0	0	51.1286	1	1	44.0646	60.401
DATA	159	2	74	0	0	A_64_P142521	A_64_P142521	11754.5	192.35	2.051352e+001	5.113565e+000	99	61	1.314965e+001	0	0	0	0	0	0	16.5129	1	0	42.5954	61.7406
DATA	160	2	75	66	1	DarkCorner	DarkCorner	11779.5	191.5	1.233578e+001	4.860543e+000	92	74	3.198266e+001	0	0	0	1	1	0	9.89339	1	0	65	81.4306
DATA	161	2	76	66	1	DarkCorner	DarkCorner	11804.7	191.5	4.733226e+000	4.717303e+000	80.5	64	1.690981e+001	0	0	0	0	0	0	-1.31688	0	0	57.5363	67.2512
DATA	162	2	77	66	1	DarkCorner	DarkCorner	11830.4	191.573	4.748814e+000	4.732839e+000	84	76	2.645457e+001	0	0	0	0	1	0	-0.195042	0	0	65	81.8955
DATA	163	2	78	66	1	DarkCorner	DarkCorner	11855.3	191.434	8.823192e+000	4.828702e+000	89	59	1.247701e+001	0	0	0	0	0	0	7.00769	1	0	49.5074	59.899
DATA	164	2	79	66	1	DarkCorner	DarkCorner	11881	191.545	5.061579e+000	4.788214e+000	86	76	2.435801e+001	0	0	0	0	0	0	4.00828	1	0	65	78.7419
DATA	165	2	80	66	1	DarkCorner	DarkCorner	11906.1	191.831	4.887206e+000	4.798981e+000	85	56	1.280940e+001	0	0	0	0	0	0	3.85995	1	0	45.835	56.2804
DATA	166	2	81	66	1	DarkCorner	DarkCorner	11930.9	192.175	4.801785e+000	4.805433e+000	85.5	54	1.285711e+001	0	0	0	0	0	0	3.43355	0	0	42.5954	54.9758
DATA	167	2	82	66	1	DarkCorner	DarkCorner	11957.3	191.75	4.814072e+000	4.799594e+000	82	52	1.011954e+001	0	0	0	0	0	0	1.00901	0	0	46.1809	52.7282
DATA	168	2	83	66	1	DarkCorner	DarkCorner	11982.6	191.573	4.824538e+000	4.810074e+000	80	52	1.092633e+001	0	0	0	0	0	0	1.02182	0	0	57.5363	52.9868
DATA	169	2	84	66	1	DarkCorner	DarkCorner	12008	191.545	4.833839e+000	4.825019e+000	83	53	1.133244e+001	0	0	0	0	0	0	2.09655	0	0	55.8519	52.7089
DATA	170	2	85	260	1	GE_BrightCorner	GE_BrightCorner	12033.1	192.357	4.478934e+004	4.478937e+003	34790	50	1.071606e+001	0	0	0	0	0	0	35003.5	1	1	46.5243	50.5816
DATA	171	3	1	66	1	DarkCorner	DarkCorner	9887.58	198.427	4.942164e+000	4.198978e+000	85	51	1.061642e+001	0	0	0	0	0	0	4.46898	1	0	65	50.4116
DATA	172	3	2	66	1	DarkCorner	DarkCorner	9913.14	198.407	4.165068e+000	4.151056e+000	83	58	1.394706e+001	0	0	0	0	0	0	-0.0063668	0	0	65	59.9355
DATA	173	3	3	66	1	DarkCorner	DarkCorner	9938.06	198.325	4.147707e+000	4.133754e+000	80	60	1.246216e+001	0	0	0	0	0	0	-0.814532	0	0	49.5074	61.3396
DATA	174	3	4	66	1	DarkCorner	DarkCorner	9963.2	198.407	4.131016e+000	4.117119e+000	73.5	56	1.359916e+001	0	0	0	0	0	0	-7.10425	0	0	50.7771	57.3377
DATA	175	3	5	66	1	DarkCorner	DarkCorner	9989.42	198.427	4.114626e+000	4.100784e+000	77	55	1.153914e+001	0	0	0	0	0	0	-2.6857	0	0	57.5363	56.6207
DATA	176	3	6	66	1	DarkCorner	DarkCorner	10014.6	198.538	4.099743e+000	4.085951e+000	79	51	9.828447e+000	0	0	0	0	0	0	-1.16341	0	0	45.1352	52.386
DATA	177	3	7	66	1	DarkCorner	DarkCorner	10040	198.455	4.085807e+000	4.072062e+000	74	52	9.650247e+000	0	0	0	0	0	0	-8.06609	0	0	55.8519	52
DATA	178	3	8	66	1	DarkCorner	DarkCorner	10065.5	198.352	4.072731e+000	4.059030e+000	76.5	54	1.183526e+001	0	0	0	0	0	0	-3.68235	0	0	57.5363	54.7547
DATA	179	3	9	66	1	DarkCorner	DarkCorner	10090.3	198.286	4.060851e+000	4.047190e+000	73	52	1.000208e+001	0	0	0	0	0	0	-5.9839	0	0	41.4593	53.1429
DATA	180	3	10	66	1	DarkCorner	DarkCorner	10116.4	198.427	4.049175e+000	4.035553e+000	75	52	1.076916e+001	0	0	0	0	0	0	-5.99081	0	0	57.5363	53.4902
DATA	181	3	11	0	0	A_64_P269465	ENSRNOT00000055742	10141.2	198.343	2.489675e+001	4.733183e+000	104.5	53	9.217974e+000	0	0	0	0	0	0	23.3201	1	1	46.1809	54.6545
DATA	182	3	12	0	0	A_64_P140776	NM_001114502	10166.2	198.614	6.228718e+003	6.228847e+002	5664	53	1.284089e+001	0	0	0	0	0	0	5848.07	1	1	47.2035	55.8846
DATA	183	3	13	0	0	A_42_P662683	NM_001108855	10191.7	198.9	2.313244e+004	2.313248e+003	21334.5	54.5	1.045566e+001	0	0	0	0	0	0	21766.7	1	1	47.2035	55.5682
DATA	184	3	14	0	0	A_44_P308687	NM_181389	10216.9	198.913	1.594498e+002	1.643891e+001	229	55.5	1.128825e+001	0	0	0	0	0	0	150.325	1	1	46.8651	56.3261
DATA	185	3	15	0	0	A_42_P705255	NM_078622	10242.5	199.087	1.486497e+002	1.539176e+001	224	51.5	9.570844e+000	0	0	0	0	0	0	140.391	1	1	47.5395	52.375
DATA	186	3	16	0	0	A_44_P142472	NM_001106072	10268.2	199.132	9.574733e+003	9.574816e+002	8831.5	56	1.178024e+001	0	0	0	0	0	0	9056.76	1	1	46.1809	56.4706
DATA	187	3	17	0	0	A_64_P015946	NM_001009720	10294	198.455	1.094491e+003	1.095215e+002	1114	54	1.107467e+001	0	0	0	0	0	0	1036.55	1	1	55.8519	54.6774
DATA	188	3	18	0	0	A_64_P118698	ENSRNOT00000050943	10318.9	198.783	3.096437e+001	5.040166e+000	111.5	55	1.032233e+001	0	0	0	0	0	0	29.3581	1	1	46.5243	55.8966
DATA	189	3	19	0	0	A_42_P705302	NM_001107361	10344.1	198.732	6.238649e+003	6.238776e+002	5816.5	58.5	1.005241e+001	0	0	0	0	0	0	5920.24	1	1	47.5395	56.9259
DATA	190	3	20	0	0	A_64_P097547	NM_001100528	10370.3	198.625	3.278750e+001	5.149352e+000	115	56.5	9.987681e+000	0	0	0	0	0	0	31.1357	1	1	44.7812	55.9524
DATA	191	3	21	0	0	A_42_P815485	NM_001013908	10394.7	198.778	8.766002e+003	8.766092e+002	8115	58	1.340488e+001	0	0	0	0	0	0	8328.47	1	1	47.5395	60.0377
DATA	192	3	22	0	0	A_42_P526728	ENSRNOT00000060758	10420.3	198.919	2.536149e+003	2.536460e+002	2392	53	8.337898e+000	0	0	0	0	0	0	2410.32	1	1	48.8603	53.8727
DATA	193	3	23	0	0	A_42_P692317	NM_001107565	10445.7	198.9	8.982547e+002	8.991303e+001	909	57	1.145569e+001	0	0	0	0	0	0	853.761	1	1	47.2035	57.5217
DATA	194	3	24	0	0	A_44_P383949	NM_175593	10470.2	198.765	3.381201e+001	5.212864e+000	114	57	1.345981e+001	0	0	0	0	0	0	32.1333	1	1	40.6843	59.7656
DATA	195	3	25	0	0	A_42_P589570	NM_001014105	10497.3	198.5	3.418859e+002	3.441820e+001	418	59	1.280330e+001	0	0	0	0	0	0	324.793	1	1	57.5363	60.1525
DATA	196	3	26	0	0	A_64_P012384	NM_001039338	10522.5	198.5	1.380424e+002	1.436403e+001	211.5	54	9.034837e+000	0	0	0	0	0	0	131.076	1	1	57.5363	53.7636
DATA	197	3	27	0	0	A_64_P088612	NM_053871	10547.1	198.614	4.714475e+003	4.714642e+002	4437.5	53	1.384548e+001	0	0	0	0	0	0	4473.67	1	1	47.2035	55.2632
DATA	198	3	28	0	0	A_42_P668072	NM_013130	10573.4	198.427	1.948494e+002	1.988671e+001	266.5	54	1.179703e+001	0	0	0	0	0	0	184.724	1	1	57.5363	55.1148
DATA	199	3	29	0	0	A_44_P624451	NM_001134605	10598.6	198.427	1.404926e+002	1.460252e+001	214	49	1.143985e+001	0	0	0	0	0	0	133.052	1	1	57.5363	50.4906
DATA	200	3	30	0	0	A_64_P118502	A_64_P118502	10624.1	198.5	3.545542e+002	3.567881e+001	409	57	1.517721e+001	0	0	0	0	0	0	335.364	1	1	65	58.8814
DATA	201	3	31	0	0	A_43_P15761	NM_031608	10649	199.266	1.448224e+002	1.502219e+001	218	50	9.885563e+000	0	0	0	0	0	0	136.812	1	1	48.5334	51.0536
DATA	202	3	32	0	0	A_42_P667696	NM_001191800	10674.3	199.29	1.113061e+003	1.113779e+002	1115	48	1.183607e+001	0	0	0	0	0	0	1049.84	1	1	46.8651	49.2157
DATA	203	3	33	0	0	A_44_P899121	NM_001079941	10699.7	198.753	4.108907e+003	4.109102e+002	3779.5	46	1.314443e+001	0	0	0	0	1	0	3868.38	1	1	48.2044	47.2292
DATA	204	3	34	0	0	A_42_P642757	NM_031235	10724.6	198.63	4.440688e+003	4.440870e+002	4155.5	46	8.638735e+000	0	0	0	0	1	0	4172.76	1	1	48.2044	46.6176
DATA	205	3	35	0	0	A_64_P066694	NM_001033898	10750.4	199.013	6.223796e+001	7.409669e+000	142	48	1.094407e+001	0	0	0	0	0	0	58.3632	1	1	49.1849	49.1639
DATA	206	3	36	0	0	A_42_P699201	TC594545	10776.5	198.5	2.303349e+001	4.642259e+000	107	57	1.123486e+001	0	0	0	0	0	0	21.5478	1	1	57.5363	57.3214
DATA	207	3	37	0	0	A_42_P591944	NM_172093	10800.9	199.026	1.305079e+002	1.366164e+001	203	56	1.731668e+001	0	0	0	0	0	0	121.82	1	1	46.8651	60.6122
DATA	208	3	38	0	0	A_44_P115293	NM_001108294	10827.3	198.5	3.580694e+002	3.603532e+001	411.5	87	4.250981e+001	0	0	0	0	1	0	333.318	1	1	57.5363	99.0333
DATA	209	3	39	1028	1	(+)E1A_r60_a107	E1A_r60_a107	10852.5	198.5	1.970230e+001	4.514054e+000	101	105.5	3.413305e+001	0	0	0	0	1	0	18.2915	1	0	57.5363	108.984
DATA	210	3	40	0	0	A_44_P194531	NM_001007742	10877.5	199.212	2.261332e+002	2.297706e+001	284	69	1.376331e+001	0	0	0	0	0	0	209.383	1	1	46.5243	70.25
DATA	211	3	41	0	0	A_43_P20016	NM_001107377	10902.9	199.116	1.241414e+002	1.306878e+001	198	69	1.440334e+001	0	0	0	0	0	0	114.603	1	1	46.8651	70.0213
DATA	212	3	42	0	0	A_64_P105550	A_64_P105550	10928.7	198.5	1.161639e+002	1.231795e+001	188	77	2.195366e+001	0	0	0	0	1	0	106.889	1	1	57.5363	81.8571
DATA	213	3	43	0	0	A_42_P791872	NM_001135174	10953.6	198.933	9.854568e+003	9.854654e+002	8578	84	2.563401e+001	0	0	0	0	1	0	9039.81	1	1	49.1849	88.7179
DATA	214	3	44	0	0	A_42_P499273	NM_001012148	10978.9	198.74	3.455121e+003	3.455368e+002	3117	63	1.956603e+001	0	0	0	0	0	0	3158.79	1	1	47.8731	67.8667
DATA	215	3	45	0	0	A_64_P021960	NM_001109493	11004.8	199.176	3.644674e+002	3.668095e+001	413	106	5.280971e+001	0	0	0	0	1	0	332.065	1	1	48.2044	120.566
DATA	216	3	46	0	0	A_64_P083725	A_64_P083725	11030.4	198.573	1.315545e+005	1.315545e+004	119629	114	4.164887e+001	0	0	0	0	1	0	119413	1	1	57.5363	116.604
DATA	217	3	47	0	0	A_42_P524536	NM_012698	11055.1	198.932	3.546261e+002	3.570676e+001	391	64	2.453830e+001	0	0	0	0	0	0	320.772	1	1	46.8651	68.0889
DATA	218	3	48	0	0	A_64_P151675	NM_175755	11080.5	199.225	8.790777e+001	9.735687e+000	168	58	1.191331e+001	0	0	0	0	0	0	79.2212	1	1	47.5395	57.3696
DATA	219	3	49	0	0	A_64_P146914	A_64_P146914	11106	198.897	1.907329e+003	1.907792e+002	1756	55.5	1.322482e+001	0	0	0	0	0	0	1712.09	1	1	46.8651	56.4815
DATA	220	3	50	0	0	A_64_P115065	NM_001109631	11131.9	198.5	1.656396e+001	4.531426e+000	95	57.5	1.506148e+001	0	0	0	0	0	0	14.8074	1	0	56.9804	59.9063
DATA	221	3	51	0	0	A_42_P468771	NM_001107362	11156.8	199.265	2.909040e+003	2.909348e+002	2577	57.5	1.297137e+001	0	0	0	0	0	0	2590.7	1	1	46.1809	56.6923
DATA	222	3	52	0	0	A_44_P226461	NM_053798	11181.7	199.167	1.326803e+003	1.327484e+002	1192	58	1.277201e+001	0	0	0	0	0	0	1176.84	1	1	45.835	58.2041
DATA	223	3	53	0	0	A_64_P009440	NM_001109313	11207.4	198.829	2.526469e+001	4.960846e+000	103	56	1.031497e+001	0	0	0	0	0	0	22.3133	1	1	51.0895	55.1636
DATA	224	3	54	0	0	A_44_P282433	NM_033230	11233.5	198.648	8.566974e+002	8.577698e+001	830	52.5	1.160081e+001	0	0	0	0	0	0	753.314	1	1	57.5363	54.5536
DATA	225	3	55	0	0	A_42_P461003	NM_001044283	11258.6	199.116	1.447700e+004	1.447706e+003	12378	60	1.363990e+001	0	0	0	0	0	0	12677.5	1	1	46.8651	60.5102
DATA	226	3	56	0	1	ETG10_236652	ETG10_236652	11284	199.048	2.170689e+001	4.838686e+000	100.5	59	1.067611e+001	0	0	0	0	0	0	18.9265	1	1	45.4864	59.0526
DATA	227	3	57	0	0	A_42_P529780	NM_138855	11309	199.277	7.204386e+002	7.217464e+001	692	61	1.082404e+001	0	0	0	0	0	0	625.494	1	1	45.4864	60.0816
DATA	228	3	58	0	0	A_42_P492976	NM_001126099	11334.5	199.145	3.258762e+002	3.287828e+001	356	56.5	1.277520e+001	0	0	0	0	0	0	281.679	1	1	47.2035	59.1667
DATA	229	3	59	0	0	A_42_P533865	NM_001127650	11360.3	198.943	4.075752e+001	5.984408e+000	116	64.5	1.360336e+001	0	0	0	0	0	0	35.0709	1	1	52.6241	63.8906
DATA	230	3	60	0	0	A_64_P026399	NM_001007626	11385.6	198.573	9.533388e+002	9.543544e+001	880	58	1.229488e+001	0	0	0	0	0	0	816.645	1	1	57.5363	59.0943
DATA	231	3	61	0	0	A_64_P152543	XM_221353	11410.4	199.29	1.839171e+004	1.839177e+003	15302	59.5	1.223847e+001	0	0	0	0	0	0	15688.9	1	1	46.8651	59.9167
DATA	232	3	62	0	0	A_44_P203195	NM_053585	11435.7	199.357	8.148156e+002	8.160242e+001	755	61	1.213676e+001	0	0	0	0	0	0	692.02	1	1	46.8651	62.1607
DATA	233	3	63	0	0	A_42_P490612	NM_001108262	11461.3	199.254	7.562084e+003	7.562216e+002	6251	56	9.860168e+000	0	0	0	0	0	0	6393.77	1	1	45.835	56.1481
DATA	234	3	64	0	0	A_44_P457548	NM_001103351	11487.5	198.648	5.904783e+001	7.412225e+000	132	57	1.179183e+001	0	0	0	0	0	0	49.692	1	1	57.5363	55.5
DATA	235	3	65	0	0	A_42_P755665	NM_001013154	11512.3	199.431	2.174537e+003	2.175002e+002	1815.5	55	1.220177e+001	0	0	0	0	0	0	1822.51	1	1	47.5395	57.1481
DATA	236	3	66	0	0	A_42_P781999	NM_001106378	11537.6	199.29	2.242830e+004	2.242835e+003	18360	60.5	1.246760e+001	0	0	0	0	0	0	18715.8	1	1	46.8651	60.2593
DATA	237	3	67	0	0	A_44_P100289	ENSRNOT00000049514	11563.5	198.648	7.250226e+001	8.553871e+000	141	55	1.018799e+001	0	0	0	0	0	0	60.2272	1	1	57.5363	55.5352
DATA	238	3	68	0	0	A_42_P629599	ENSRNOT00000023101	11588.9	198.614	8.029048e+002	8.041978e+001	717.5	55	7.783406e+000	0	0	0	1	0	0	664.136	1	1	57.259	55.1481
DATA	239	3	69	0	0	A_44_P192083	NM_001047088	11614.5	198.648	7.494951e+001	8.782307e+000	141	56	1.179337e+001	0	0	0	0	0	0	61.7355	1	1	57.5363	55.463
DATA	240	3	70	0	0	A_42_P498066	NM_031136	11639.6	198.573	9.887668e+004	9.887670e+003	80955	58	1.496370e+001	0	0	0	0	0	0	81112.7	1	1	57.5363	61.1356
DATA	241	3	71	0	0	A_42_P519910	NM_001106292	11664.2	199.333	3.049438e+004	3.049442e+003	24325.5	56	1.127265e+001	0	0	0	0	0	0	24922.5	1	1	45.4864	57.1333
DATA	242	3	72	0	0	A_42_P657538	NM_001008362	11689.7	199.357	3.832993e+003	3.833273e+002	3119.5	60.5	1.343938e+001	0	0	0	0	0	0	3120.29	1	1	46.8651	58.5357
DATA	243	3	73	0	0	A_64_P030630	NM_001109610	11715.6	199.083	5.475946e+003	5.476143e+002	4509	66	1.387985e+001	0	0	0	0	0	0	4440.07	1	1	49.8279	68.0426
DATA	244	3	74	0	0	A_44_P126366	NM_001017456	11740.9	199.304	6.817891e+001	8.262398e+000	134	64	1.406463e+001	0	0	0	0	0	0	55.0796	1	1	46.1809	65.8421
DATA	245	3	75	0	0	A_43_P15627	ENSRNOT00000067029	11766.9	199.029	5.798921e+001	7.454883e+000	126	74	2.936356e+001	0	0	0	0	1	0	46.6721	1	1	46.8651	84.5088
DATA	246	3	76	0	0	A_42_P754784	CB328432	11791.8	199.216	7.595332e+003	7.595477e+002	6043	79	2.559675e+001	0	0	0	0	1	0	6092.48	1	1	47.8731	82.9216
DATA	247	3	77	66	1	DarkCorner	DarkCorner	11817.5	199	4.732710e+000	4.716788e+000	80	80	2.751329e+001	0	0	0	0	1	0	-0.834422	0	0	65	85.6061
DATA	248	3	78	66	1	DarkCorner	DarkCorner	11842.9	198.935	5.953984e+000	4.769207e+000	84	72.5	1.967082e+001	0	0	0	0	0	0	4.74437	1	0	65	74
DATA	249	3	79	66	1	DarkCorner	DarkCorner	11868.5	199	6.638682e+000	4.792437e+000	85	62.5	1.948605e+001	0	0	0	0	0	0	5.27398	1	0	54.1152	68.3036
DATA	250	3	80	66	1	DarkCorner	DarkCorner	11893.2	198.705	4.775768e+000	4.759702e+000	81	62	1.424669e+001	0	0	0	0	0	0	-2.03112	0	0	50.7771	62.8228
DATA	251	3	81	66	1	DarkCorner	DarkCorner	11919	199	4.788379e+000	4.772271e+000	80	62	1.379869e+001	0	0	0	0	0	0	-0.984576	0	0	54.9904	61.2131
DATA	252	3	82	66	1	DarkCorner	DarkCorner	11944.6	198.862	4.800440e+000	4.805722e+000	84.5	58	1.144154e+001	0	0	0	0	0	0	3.5729	0	0	42.9674	58.4746
DATA	253	3	83	66	1	DarkCorner	DarkCorner	11969.8	199.233	4.810777e+000	4.794593e+000	76	60	9.629982e+000	0	0	0	0	0	0	-3.53046	0	0	47.8731	59.5926
DATA	254	3	84	66	1	DarkCorner	DarkCorner	11995.5	199	5.806775e+000	4.839704e+000	87	56	1.027401e+001	0	0	0	0	0	0	4.55691	1	0	54.1152	57.4844
DATA	255	3	85	66	1	DarkCorner	DarkCorner	12020.5	199	7.138713e+000	4.865940e+000	85.5	56	1.208684e+001	0	0	0	0	0	0	5.59221	1	0	54.1152	55.5909
DATA	256	4	1	66	1	DarkCorner	DarkCorner	9899.47	205.578	4.170352e+000	4.156322e+000	77	54	1.136776e+001	0	0	0	0	0	0	-2.39566	0	0	45.1352	55.1176
DATA	257	4	2	66	1	DarkCorner	DarkCorner	9925.67	205.5	4.151651e+000	4.137685e+000	80	60	1.336892e+001	0	0	0	0	0	0	-0.187738	0	0	57.5363	62.1463
DATA	258	4	3	66	1	DarkCorner	DarkCorner	9950.98	205.333	4.134594e+000	4.120685e+000	79	60	1.442279e+001	0	0	0	0	0	0	-3.85112	0	0	39.0882	61.5714
DATA	259	4	4	66	1	DarkCorner	DarkCorner	9976.63	205.458	4.118074e+000	4.104221e+000	75.5	57	1.001272e+001	0	0	0	0	0	0	-3.21593	0	0	40.2912	56.4808
DATA	260	4	5	66	1	DarkCorner	DarkCorner	10002	205.545	4.102686e+000	4.088884e+000	78	54	1.198920e+001	0	0	0	0	0	0	-1.3284	0	0	55.8519	56.4688
DATA	261	4	6	66	1	DarkCorner	DarkCorner	10027.4	205.573	4.088231e+000	4.074478e+000	69.5	56	1.120034e+001	0	0	0	0	0	0	-10.3412	0	0	57.5363	56.3125
DATA	262	4	7	66	1	DarkCorner	DarkCorner	10053.1	205.943	4.074368e+000	4.060662e+000	74	56	1.165655e+001	0	0	0	0	0	0	-4.02012	0	0	41.0736	57.9412
DATA	263	4	8	66	1	DarkCorner	DarkCorner	10078.3	205.5	4.062100e+000	4.048435e+000	72	54	8.746370e+000	0	0	0	0	0	0	-9.56101	0	0	57.5363	55.2188
DATA	264	4	9	66	1	DarkCorner	DarkCorner	10103.6	205.573	4.050419e+000	4.036793e+000	75	59	1.247277e+001	0	0	0	0	0	0	-6.22407	0	0	57.5363	58.4848
DATA	265	4	10	0	0	A_44_P807031	NM_001108921	10128.4	205.738	6.418010e+003	6.418136e+002	6011.5	55.5	8.138890e+000	0	0	0	0	0	0	6010.57	1	1	51.0895	55.8077
DATA	266	4	11	0	0	A_64_P025813	NM_001009379	10154.4	205.573	4.029651e+000	4.016095e+000	80	52	1.200379e+001	0	0	0	0	0	0	-1.20679	0	0	57.5363	55.7368
DATA	267	4	12	0	0	A_64_P130551	XM_001081846	10179.6	205.573	4.020672e+000	4.007146e+000	81	60	1.089756e+001	0	0	0	0	0	0	-0.878563	0	0	57.5363	58.4865
DATA	268	4	13	0	0	A_42_P715449	NM_001033709	10205.1	205.5	1.819452e+003	1.819891e+002	1767	58	1.067468e+001	0	0	0	1	0	0	1715.53	1	1	56.9804	59.1111
DATA	269	4	14	0	0	A_42_P727584	NM_031622	10229.4	206.29	3.603905e+003	3.604126e+002	3278	55	1.107563e+001	0	0	0	0	0	0	3404.43	1	1	46.8651	53.8519
DATA	270	4	15	0	0	A_42_P600642	NM_001008386	10255.9	205.5	2.585770e+002	2.616300e+001	325	55	1.029066e+001	0	0	0	1	0	0	244.65	1	1	65	54.9091
DATA	271	4	16	0	0	A_42_P669103	NM_001108329	10280.4	206.29	1.299332e+003	1.299941e+002	1269	56	1.195104e+001	0	0	0	0	0	0	1231.18	1	1	46.8651	57.4103
DATA	272	4	17	0	0	A_44_P715330	NM_001024966	10306.3	206.261	7.978777e+002	7.988669e+001	825	53	1.500958e+001	0	0	0	0	0	0	756.955	1	1	46.8651	59.2308
DATA	273	4	18	0	0	A_64_P083185	NM_001107199	10332	205.545	6.272444e+002	6.285000e+001	668.5	59	9.809936e+000	0	0	0	0	0	0	595.611	1	1	55.8519	57.2121
DATA	274	4	19	0	0	A_64_P037313	ENSRNOT00000030164	10357.5	205.648	1.474508e+001	4.232721e+000	95.5	61	1.265396e+001	0	0	0	0	0	0	14.0129	1	0	57.5363	60.7714
DATA	275	4	20	0	0	A_44_P321009	NM_012540	10382.6	205.573	3.978700e+000	3.971907e+000	84	53	1.101900e+001	0	0	0	0	0	0	2.17499	0	0	65	55.55
DATA	276	4	21	0	0	A_42_P700753	FQ212883	10407.6	206.214	2.553500e+003	2.553808e+002	2427	56.5	1.078040e+001	0	0	0	0	0	0	2429.27	1	1	47.5395	59.0714
DATA	277	4	22	0	0	A_44_P775974	NM_001024363	10433.6	205.573	6.337087e+000	4.013345e+000	86	57	1.044018e+001	0	0	0	0	0	0	6.02937	1	0	57.5363	58.2821
DATA	278	4	23	0	0	A_44_P503868	A_44_P503868	10458.6	206.312	2.913313e+003	2.913582e+002	2835	59	1.273698e+001	0	0	0	0	0	0	2772.15	1	1	48.8603	60
DATA	279	4	24	0	0	A_64_P122541	A_64_P122541	10484.3	206.507	2.347778e+002	2.380994e+001	303.5	54	1.339000e+001	0	0	0	0	0	0	223.364	1	1	45.835	59.0238
DATA	280	4	25	0	0	A_64_P080967	NM_001033890	10509.4	206.129	1.228286e+004	1.228293e+003	11353	57	1.218495e+001	0	0	0	0	0	0	11680.5	1	1	46.8651	58.8387
DATA	281	4	26	0	0	A_44_P1056309	NM_001105912	10535.4	205.573	2.720448e+001	4.810794e+000	109	55	1.251231e+001	0	0	0	0	0	0	25.8526	1	1	57.5363	54.9714
DATA	282	4	27	0	0	A_44_P199514	NM_001005564	10559.7	205.955	2.514499e+003	2.514813e+002	2445	52	1.152080e+001	0	0	0	0	0	0	2387.94	1	1	45.835	52.4615
DATA	283	4	28	0	0	A_64_P097952	NM_001134962	10585.8	205.528	8.071625e+001	8.997130e+000	160	53.5	1.381382e+001	0	0	0	0	0	0	76.5732	1	1	47.8731	56.7813
DATA	284	4	29	0	0	A_42_P813939	NM_001108741	10610.4	206.375	2.987962e+003	2.988227e+002	2889.5	55	1.379473e+001	0	0	0	0	0	0	2831.87	1	1	47.5395	53.8065
DATA	285	4	30	0	0	A_64_P006423	NM_012584	10636.5	206.013	1.077905e+001	4.127235e+000	93	57.5	1.273547e+001	0	0	0	0	0	0	10.2016	1	0	48.5334	56.25
DATA	286	4	31	0	0	A_42_P670614	NM_001107097	10661.4	206.514	5.183660e+003	5.183814e+002	4975	53	9.447193e+000	0	0	0	1	0	0	4899.23	1	1	46.8651	52.129
DATA	287	4	32	0	0	A_64_P084088	NM_001011954	10687.2	206.333	4.721650e+002	4.738532e+001	528.5	52	1.132989e+001	0	0	0	0	0	0	445.493	1	1	46.8651	51.4595
DATA	288	4	33	0	0	A_64_P025643	XM_001073566	10712.9	205.614	2.575102e+002	2.606048e+001	327	46.5	1.054707e+001	0	0	0	0	1	0	242.484	1	1	65	47.1765
DATA	289	4	34	0	0	A_42_P719607	NM_153721	10739.3	206.744	6.428487e+001	7.577578e+000	139	46	8.250697e+000	0	0	0	1	1	0	60.4198	1	1	36.9964	47.1364
DATA	290	4	35	0	0	A_42_P843603	NM_052800	10762.9	206.104	4.665079e+002	4.682370e+001	516	54.5	1.234974e+001	0	0	0	0	0	0	437.535	1	1	46.8651	51.9667
DATA	291	4	36	0	0	A_44_P234129	NM_001135802	10788.8	206.127	1.839122e+002	1.882751e+001	258.5	58	1.078267e+001	0	0	0	0	0	0	172.086	1	1	46.8651	60.1379
DATA	292	4	37	0	0	A_42_P701161	NM_001033666	10813.7	206.135	8.099095e+003	8.099195e+002	7318	68	1.761398e+001	0	0	0	0	0	0	7560.04	1	1	48.5334	67.5641
DATA	293	4	38	0	0	A_44_P1017335	NM_001108607	10839.4	206.307	8.679221e+003	8.679315e+002	7826	102.5	2.919358e+001	0	0	0	0	1	0	8080.5	1	1	47.8731	104.289
DATA	294	4	39	0	0	A_44_P900209	CV121387	10865.5	206	7.966445e+001	8.942102e+000	157	84	3.999816e+001	0	0	0	0	1	0	73.9552	1	1	54.1152	96.6216
DATA	295	4	40	0	0	A_64_P037517	ENSRNOT00000014921	10890.1	206.314	1.876637e+002	1.920324e+001	252	68.5	1.782914e+001	0	0	0	0	0	0	173.737	1	1	46.8651	73.5
DATA	296	4	41	0	0	A_64_P128528	NM_001106013	10915.1	206.061	3.106408e+003	3.106677e+002	2864	63	1.473943e+001	0	0	0	0	0	0	2867.21	1	1	46.1809	65.1622
DATA	297	4	42	0	0	A_64_P378865	NM_001000706	10941.5	206	8.552619e+001	9.483956e+000	164	70	1.565491e+001	0	0	0	0	0	0	78.6819	1	1	54.1152	71.525
DATA	298	4	43	0	0	A_42_P553960	NM_001107831	10966.3	206.1	1.073886e+004	1.073894e+003	9491.5	72.5	1.517688e+001	0	0	0	0	0	0	9848.12	1	1	47.2035	69.7188
DATA	299	4	44	0	0	A_42_P717654	XM_001063683	10991.4	206	4.350547e+003	4.350743e+002	3801	101.5	4.026494e+001	0	0	0	0	1	0	3976.28	1	1	48.5334	103.353
DATA	300	4	45	0	0	A_44_P295118	NM_001107228	11017.5	206	3.315575e+002	3.341326e+001	373.5	110	6.083149e+001	0	0	0	0	1	0	301.945	1	1	65	129.595
DATA	301	4	46	0	0	A_64_P049057	ENSRNOT00000014519	11042	206.139	1.691156e+003	1.691667e+002	1562.5	62.5	1.128164e+001	0	0	0	0	0	0	1534.79	1	1	46.8651	60.8333
DATA	302	4	47	0	0	A_42_P810287	NM_001004107	11067.5	206.265	2.790770e+003	2.791082e+002	2558.5	61	1.222495e+001	0	0	0	0	0	0	2523.4	1	1	46.5243	59.871
DATA	303	4	48	0	0	A_42_P702729	NM_001107557	11093.3	206.12	2.022464e+003	2.022897e+002	1875	61	9.554580e+000	0	0	0	0	0	0	1821.58	1	1	50.1463	60.96
DATA	304	4	49	0	0	A_42_P811084	NM_173147	11118.6	206.095	2.603006e+003	2.603346e+002	2318.5	57.5	1.484256e+001	0	0	0	0	0	0	2335.38	1	1	48.8603	61.3889
DATA	305	4	50	0	0	A_64_P151473	A_64_P151473	11143.9	206.2	2.550639e+004	2.550642e+003	22954	60	1.465538e+001	0	0	0	0	0	0	22794	1	1	46.8651	61.697
DATA	306	4	51	0	0	A_44_P134634	ENSRNOT00000000260	11170	206	1.218653e+002	1.290208e+001	193	60.5	8.750115e+000	0	0	0	0	0	0	108.45	1	1	54.9904	59.625
DATA	307	4	52	0	0	A_44_P178479	NM_001135039	11194.8	206.236	8.813384e+002	8.823644e+001	838	59	1.326443e+001	0	0	0	0	0	0	781.203	1	1	47.5395	59.5152
DATA	308	4	53	0	0	A_64_P317400	ENSRNOT00000068382	11220.4	206.13	4.430824e+001	6.154828e+000	120	58	1.424902e+001	0	0	0	0	0	0	39.1077	1	1	47.2035	59.5135
DATA	309	4	54	0	0	A_42_P781735	NM_053319	11246.5	206	9.021717e+004	9.021718e+003	80066	61	1.483375e+001	0	0	0	0	0	0	79280.1	1	1	54.1152	60.96
DATA	310	4	55	0	0	A_64_P144869	NM_017131	11271.1	206.211	5.926075e+002	5.941716e+001	598	61	9.145614e+000	0	0	0	0	0	0	518.626	1	1	47.2035	59.9211
DATA	311	4	56	0	0	A_44_P445484	ENSRNOT00000049980	11296.3	206.303	9.398723e+002	9.408678e+001	897	61	1.299253e+001	0	0	0	0	0	0	819.032	1	1	48.5334	60.4333
DATA	312	4	57	0	0	A_42_P487832	NM_001108389	11321.6	206.027	1.857675e+003	1.858183e+002	1599	64	1.459809e+001	0	0	0	0	0	0	1611.73	1	1	48.5334	61.6667
DATA	313	4	58	0	0	A_42_P482829	NM_001108138	11346.8	206.103	1.082120e+003	1.083000e+002	989.5	60	1.349563e+001	0	0	0	0	0	0	934.773	1	1	46.5243	60.9189
DATA	314	4	59	0	0	A_64_P101440	XM_001065775	11373.4	206.404	5.041816e+000	4.413665e+000	86	67	1.074418e+001	0	0	0	0	0	0	4.33556	1	0	65	67.8611
DATA	315	4	60	0	0	A_64_P072268	NM_001002277	11398.5	206.352	6.941983e+002	6.955939e+001	680	65	1.177798e+001	0	0	0	0	0	0	594.343	1	1	57.5363	64.4815
DATA	316	4	61	0	0	A_42_P589190	NM_023104	11423.9	206.386	8.078452e+002	8.090554e+001	751	65.5	1.403428e+001	0	0	0	0	0	0	688.593	1	1	57.259	67.0667
DATA	317	4	62	0	0	A_64_P027328	A_64_P027328	11449.4	206.427	4.434001e+002	4.456208e+001	469	60	1.322450e+001	0	0	0	0	0	0	376.277	1	1	57.5363	62.6286
DATA	318	4	63	0	0	A_42_P788541	NM_001106794	11474.3	206.373	6.508279e+003	6.508432e+002	5394	57.5	9.804324e+000	0	0	0	0	0	0	5499.23	1	1	49.1849	58.2353
DATA	319	4	64	0	0	A_42_P457003	NM_012802	11499.3	206.514	7.574264e+003	7.574397e+002	6035	59	1.134521e+001	0	0	0	0	0	0	6372.48	1	1	48.2044	60.0769
DATA	320	4	65	0	0	A_64_P095695	A_64_P095695	11525.5	206.352	8.972138e+001	1.003827e+001	159	60	1.505206e+001	0	0	0	0	0	0	75.1452	1	1	65	60.7576
DATA	321	4	66	0	0	A_42_P463880	NM_001013927	11550.9	206.386	8.172037e+001	9.339439e+000	153	59	1.402850e+001	0	0	0	0	0	0	68.1498	1	1	57.259	60.8718
DATA	322	4	67	0	0	A_43_P20354	NM_001134574	11576.4	206.427	1.139533e+002	1.226670e+001	178	56	9.246467e+000	0	0	0	0	0	0	94.6249	1	1	57.5363	56.4474
DATA	323	4	68	0	0	A_64_P055958	ENSRNOT00000056114	11601.6	206.427	5.183558e+001	6.903645e+000	124	58	1.110341e+001	0	0	0	0	0	0	42.8643	1	1	57.5363	60
DATA	324	4	69	0	0	A_64_P159044	ENSRNOT00000040690	11627.1	206.386	1.141809e+003	1.142727e+002	1038.5	58	1.454344e+001	0	0	0	0	0	0	940.267	1	1	65	60.0588
DATA	325	4	70	0	0	A_44_P473234	ENSRNOT00000024858	11652.5	206.352	6.247657e+002	6.264550e+001	571	65.5	1.357996e+001	0	0	0	0	0	0	512.395	1	1	57.5363	63.8125
DATA	326	4	71	0	0	A_42_P797965	NM_001108497	11677.3	206.333	1.253054e+003	1.253904e+002	1062.5	66	1.026320e+001	0	0	0	0	0	0	1023.69	1	1	48.5334	65.4444
DATA	327	4	72	0	0	A_42_P592157	NM_001002828	11703.4	206.427	3.223656e+002	3.256789e+001	343	66	1.188614e+001	0	0	0	1	0	0	262.313	1	1	57.5363	67.9697
DATA	328	4	73	0	0	A_64_P016419	NM_001000622	11728.6	206.427	5.138312e+001	6.930759e+000	120	72	1.524309e+001	0	0	0	0	0	0	41.6549	1	1	57.5363	71.5217
DATA	329	4	74	0	0	A_44_P306863	XM_344447	11753.1	206.391	1.791058e+003	1.791666e+002	1506.5	70.5	1.612739e+001	0	0	0	0	0	0	1446.81	1	1	46.8651	72.2941
DATA	330	4	75	0	0	A_42_P471835	TC610276	11778.8	206.519	4.594067e+003	4.594306e+002	3578	81	3.622981e+001	0	0	0	0	1	0	3697.92	1	1	49.8279	91.1081
DATA	331	4	76	0	1	ETG02_36680	ETG02_36680	11804.6	206.427	1.256976e+001	4.865788e+000	92.5	87.5	2.059879e+001	0	0	0	0	1	0	10.0827	1	0	65	87.4118
DATA	332	4	77	66	1	DarkCorner	DarkCorner	11830.4	206.427	4.732149e+000	4.736212e+000	83	74.5	1.950304e+001	0	0	0	0	0	0	3.47465	0	0	65	79.875
DATA	333	4	78	66	1	DarkCorner	DarkCorner	11855.6	206.427	4.746706e+000	4.744547e+000	83	60	1.442854e+001	0	0	0	0	0	0	2.88309	0	0	57.5363	63.129
DATA	334	4	79	66	1	DarkCorner	DarkCorner	11879.6	206.654	4.759646e+000	4.762060e+000	85	66	1.641720e+001	0	0	0	0	0	0	3.32656	0	0	51.0895	67.6818
DATA	335	4	80	66	1	DarkCorner	DarkCorner	11906.4	206.427	4.773801e+000	4.757742e+000	78	63	1.421922e+001	0	0	0	0	0	0	-1.38184	0	0	57.5363	63.7593
DATA	336	4	81	66	1	DarkCorner	DarkCorner	11931.7	206.482	4.785950e+000	4.769850e+000	80	62.5	1.486893e+001	0	0	0	0	0	0	-1.81396	0	0	51.7088	61.4667
DATA	337	4	82	66	1	DarkCorner	DarkCorner	11956.2	206.426	4.796972e+000	4.780835e+000	79.5	59	9.460444e+000	0	0	0	0	0	0	-1.28962	0	0	41.8414	61.2
DATA	338	4	83	66	1	DarkCorner	DarkCorner	11981.5	207.098	6.654690e+000	4.836367e+000	86.5	64	8.209702e+000	0	0	0	0	0	0	5.238	1	0	43.7019	61.9722
DATA	339	4	84	66	1	DarkCorner	DarkCorner	12007.7	207.013	9.352148e+000	4.890270e+000	87.5	61.5	9.226182e+000	0	0	0	0	0	0	7.34641	1	0	49.1849	59.825
DATA	340	4	85	66	1	DarkCorner	DarkCorner	12033.4	206.427	1.345252e+001	4.993541e+000	90.5	52	1.048233e+001	0	0	0	1	0	0	10.5478	1	0	57.5363	52.232
DATA	341	5	1	66	1	DarkCorner	DarkCorner	9887.39	212.814	4.174628e+000	4.162598e+000	84	49.5	1.059506e+001	0	0	0	0	0	0	1.17327	0	0	47.2035	49.6064
DATA	342	5	2	66	1	DarkCorner	DarkCorner	9912.82	213.235	4.155744e+000	4.141764e+000	80	57	1.134789e+001	0	0	0	0	0	0	-2.04507	0	0	46.1809	58.7436
DATA	343	5	3	66	1	DarkCorner	DarkCorner	9938.5	213	4.138066e+000	4.124146e+000	81	60	1.303699e+001	0	0	0	0	0	0	-2.43268	0	0	54.1152	61.4857
DATA	344	5	4	66	1	DarkCorner	DarkCorner	9963.06	213.507	4.121591e+000	4.107726e+000	76.5	57	1.273926e+001	0	0	0	0	0	0	-5.34002	0	0	46.8651	57.641
DATA	345	5	5	66	1	DarkCorner	DarkCorner	9989.5	213	4.105479e+000	4.091668e+000	72	53	1.141017e+001	0	0	0	0	0	0	-9.65655	0	0	54.1152	54.8889
DATA	346	5	6	66	1	DarkCorner	DarkCorner	10014.3	212.962	4.091018e+000	4.077256e+000	81.5	55	1.220982e+001	0	0	0	0	0	0	-0.714382	0	0	40.6843	55.7813
DATA	347	5	7	66	1	DarkCorner	DarkCorner	10040	213	4.076867e+000	4.063152e+000	68	56	9.923032e+000	0	0	0	0	0	0	-11.5111	0	0	54.9904	55.4211
DATA	348	5	8	66	1	DarkCorner	DarkCorner	10065.5	213	4.063782e+000	4.050111e+000	74.5	57	9.485199e+000	0	0	0	0	0	0	-5.59235	0	0	54.1152	57.5349
DATA	349	5	9	66	1	DarkCorner	DarkCorner	10090.6	212.931	4.051824e+000	4.038193e+000	78	54	1.008576e+001	0	0	0	0	0	0	-2.67267	0	0	53.8203	53.5484
DATA	350	5	10	0	0	A_43_P17919	XM_001070979	10116.5	213	1.927177e+001	4.464139e+000	97.5	61	1.148032e+001	0	0	0	0	0	0	18.0458	1	0	54.1152	61.5185
DATA	351	5	11	0	0	A_42_P826221	NM_012933	10140.8	213.194	6.597911e+003	6.598034e+002	6023	57	1.243215e+001	0	0	0	0	0	0	6193.56	1	1	47.5395	56.825
DATA	352	5	12	0	0	A_64_P011524	NM_001194951	10166.2	213.212	7.471634e+002	7.482372e+001	789.5	58	1.060667e+001	0	0	0	0	0	0	703.038	1	1	45.835	58.3421
DATA	353	5	13	0	0	A_44_P258417	NM_001009699	10192.5	213	8.906377e+001	9.762738e+000	165	58	1.000949e+001	0	0	0	0	0	0	83.9879	1	1	54.1152	57.8529
DATA	354	5	14	0	0	A_64_P164617	A_64_P164617	10217.5	213	6.171487e+004	6.171488e+003	57713	57	1.157972e+001	0	0	0	0	0	0	58308.7	1	1	54.1152	59.44
DATA	355	5	15	0	0	A_42_P758933	NM_001106476	10242.4	213.465	7.921300e+003	7.921400e+002	7088	58	1.383540e+001	0	0	0	1	0	0	7497.37	1	1	47.2035	60.4688
DATA	356	5	16	0	0	A_42_P573312	NM_001134761	10267.7	213.333	7.916739e+002	7.926726e+001	791	56	9.555655e+000	0	0	0	0	0	0	750.428	1	1	46.8651	56.1852
DATA	357	5	17	0	0	A_64_P096257	NM_001160228	10293.6	213.353	8.999008e+002	9.007771e+001	913.5	51	1.143689e+001	0	0	0	0	0	0	854.168	1	1	46.8651	53.8125
DATA	358	5	18	0	0	A_43_P15847	NM_178847	10319.5	213	1.129085e+002	1.196786e+001	187	59.5	1.136137e+001	0	0	0	0	0	0	107.286	1	1	54.1152	59.625
DATA	359	5	19	0	0	A_64_P139962	NM_001000675	10344.5	213	1.043523e+001	4.099679e+000	93	59	1.149366e+001	0	0	0	0	0	0	9.92438	1	0	54.1152	57.6765
DATA	360	5	20	0	0	A_64_P117474	NM_001000646	10370.4	213.069	5.943151e+000	4.006113e+000	86	61	8.464775e+000	0	0	0	0	0	0	5.65629	1	0	65	60.037
DATA	361	5	21	0	1	ERCC-00075_180	ERCC-00075_180	10395.5	213	8.643278e+000	4.053114e+000	90	59	1.326671e+001	0	0	0	0	0	0	8.23004	1	0	54.1152	62.4545
DATA	362	5	22	0	0	A_42_P740730	NM_001012136	10420.1	213.515	1.903715e+001	4.392401e+000	100	56	9.935224e+000	0	0	0	0	0	0	18.1337	1	0	44.7812	56.4688
DATA	363	5	23	0	0	A_42_P702258	NM_017227	10446.5	213	3.307439e+001	5.158234e+000	112	58.5	1.260564e+001	0	0	0	0	0	0	31.5056	1	1	54.1152	58.4688
DATA	364	5	24	0	0	A_42_P668800	NM_001127553	10470.8	213.412	1.457409e+003	1.457946e+002	1364	54	1.539858e+001	0	0	0	0	0	0	1388.25	1	1	46.1809	59.871
DATA	365	5	25	0	0	A_42_P842513	NM_031077	10496.7	213.099	5.054739e+003	5.054894e+002	4736	63	1.340152e+001	0	0	0	0	0	0	4813.23	1	1	47.5395	62.3478
DATA	366	5	26	0	0	A_64_P047697	NM_001161835	10521.9	213.211	4.908174e+002	4.924136e+001	542.5	56	1.307871e+001	0	0	0	0	0	0	467.155	1	1	47.2035	57.234
DATA	367	5	27	0	0	A_42_P660036	NM_001134727	10547.9	213.386	3.362198e+002	3.385486e+001	388	58	1.622374e+001	0	0	0	1	0	0	319.801	1	1	57.259	57.0789
DATA	368	5	28	0	0	A_64_P095050	A_64_P095050	10573.4	213.427	4.851518e+004	4.851519e+003	49648	52	1.160779e+001	0	0	0	0	0	0	46106.7	1	1	57.5363	54.7907
DATA	369	5	29	0	0	A_42_P561835	ENSRNOT00000043937	10598.5	213.352	2.515429e+002	2.546590e+001	321	60.5	1.473510e+001	0	0	0	0	0	0	238.808	1	1	57.5363	60.9167
DATA	370	5	30	0	0	A_64_P098774	ENSRNOT00000002068	10624.1	213.386	2.353634e+001	4.620816e+000	104.5	56	1.440955e+001	0	0	0	0	0	0	22.3175	1	1	65	55.425
DATA	371	5	31	0	0	A_64_P163184	NM_001107855	10649.5	213.352	5.959488e+002	5.972777e+001	640.5	56.5	1.313073e+001	0	0	0	0	0	0	564.299	1	1	57.5363	57.4474
DATA	372	5	32	0	0	A_42_P549675	NM_080577	10674	213.855	4.247753e+003	4.247940e+002	3912	54	1.191399e+001	0	0	0	0	0	0	4016.46	1	1	46.8651	53.5455
DATA	373	5	33	0	0	A_64_P287740	NM_001127601	10700.2	212.878	9.464170e+001	1.027300e+001	174	44.5	1.286817e+001	0	0	0	0	1	0	89.3133	1	1	48.2044	46.8056
DATA	374	5	34	0	0	A_64_P059545	NM_053477	10725.2	212.949	4.169994e+003	4.170186e+002	4162	45	9.385245e+000	0	0	0	0	1	0	3927.92	1	1	44.0646	45.6889
DATA	375	5	35	0	0	A_44_P465856	NM_199398	10751.1	213.386	9.186554e+001	1.002403e+001	169	46	9.327074e+000	0	0	0	0	1	0	86.3577	1	1	57.259	47.9259
DATA	376	5	36	0	0	A_42_P714075	NM_031723	10775.7	213.479	8.054860e+002	8.064883e+001	848	57	1.451710e+001	0	0	0	0	0	0	755.58	1	1	48.5334	57.6061
DATA	377	5	37	0	0	A_42_P605265	NM_053677	10801.6	213.427	4.319379e+001	5.907017e+000	126	56	1.209984e+001	0	0	0	0	0	0	40.4194	1	1	57.5363	58.4643
DATA	378	5	38	0	0	A_64_P047401	NM_001009369	10826.6	213.473	3.302263e+003	3.302510e+002	3073	70	1.914963e+001	0	0	0	0	0	0	3082.53	1	1	49.1849	74.3158
DATA	379	5	39	0	0	A_64_P018891	A_64_P018891	10852.6	213.427	1.308686e+002	1.369933e+001	204.5	121	3.115057e+001	0	0	0	0	1	0	121.826	1	1	57.5363	125.629
DATA	380	5	40	0	0	A_64_P026297	NM_022583	10876.5	214.09	4.411831e+001	5.996094e+000	121	82	2.070667e+001	0	0	0	0	1	0	40.9665	1	1	51.7088	82.8621
DATA	381	5	41	0	0	A_43_P13508	NM_001015031	10903.4	213.427	4.446556e+001	6.030569e+000	127	69	2.087552e+001	0	0	0	0	0	0	41.1556	1	1	57.5363	74.6977
DATA	382	5	42	0	0	A_64_P077426	XM_001080794	10928.1	213.608	1.571152e+004	1.571157e+003	14007.5	65	1.397330e+001	0	0	0	0	0	0	14499.2	1	1	49.1849	65.6591
DATA	383	5	43	0	0	A_44_P370175	NM_031773	10954.4	213.427	8.592679e+001	9.520531e+000	159	68	1.088225e+001	0	0	0	0	0	0	79.031	1	1	57.5363	65.56
DATA	384	5	44	0	0	A_64_P084288	NM_001000496	10979.6	213.427	7.842921e+000	4.187179e+000	87.5	76	2.483840e+001	0	0	0	0	0	0	7.18981	1	0	57.5363	76.7714
DATA	385	5	45	0	0	A_44_P400936	A_44_P400936	11005	213.455	4.682163e+002	4.700318e+001	509.5	157	7.705704e+001	0	0	0	0	1	0	427.755	1	1	55.8519	169.366
DATA	386	5	46	0	0	A_64_P019599	NM_012713	11030.4	213.427	1.622616e+002	1.674645e+001	232	74	5.554074e+001	0	0	0	0	1	0	147.714	1	1	57.5363	95.8824
DATA	387	5	47	0	0	A_44_P644356	AI556299	11055.6	213.427	1.640963e+001	4.469074e+000	96	61	1.055796e+001	0	0	0	0	0	0	14.8845	1	0	57.5363	59.4483
DATA	388	5	48	0	0	A_64_P057076	A_64_P057076	11081.3	213.5	1.154065e+002	1.227183e+001	192.5	62	1.483585e+001	0	0	0	0	0	0	104.285	1	1	57.5363	62.4444
DATA	389	5	49	0	0	A_64_P087392	NM_001108764	11106.6	213.427	1.680359e+002	1.731779e+001	237.5	60	1.160304e+001	0	0	0	0	0	0	151.262	1	1	57.5363	62.25
DATA	390	5	50	0	0	A_44_P436604	NM_001025627	11131.9	213.5	5.538230e+001	6.953722e+000	130.5	59	1.419335e+001	0	0	0	0	0	0	49.6601	1	1	56.9804	62.7317
DATA	391	5	51	0	0	A_43_P23200	NM_001107832	11156.8	213.588	5.178169e+002	5.195349e+001	549.5	58	1.163861e+001	0	0	0	0	0	0	462.505	1	1	46.5243	56.8857
DATA	392	5	52	0	0	A_42_P515876	NM_031097	11182.1	213.681	9.172071e+002	9.181859e+001	858	62	8.755019e+000	0	0	0	1	0	0	815.937	1	1	46.5243	61.7083
DATA	393	5	53	0	0	A_44_P1047924	NM_053523	11207.4	213.973	4.181173e+003	4.181389e+002	3576	58.5	1.484156e+001	0	0	0	0	0	0	3704.39	1	1	48.5334	60.0294
DATA	394	5	54	0	0	A_44_P682668	NM_001014228	11233.5	213.5	1.035776e+002	1.120517e+001	177	59.5	1.447157e+001	0	0	0	0	0	0	91.363	1	1	57.5363	60.4333
DATA	395	5	55	0	0	A_64_P061489	NM_001108746	11258.7	213.5	2.549414e+001	4.992682e+000	102	58.5	1.044306e+001	0	0	0	0	0	0	22.3931	1	1	57.5363	58.3333
DATA	396	5	56	0	0	A_64_P047747	NM_182474	11284.3	214.167	2.011990e+003	2.012452e+002	1839.5	61	8.979667e+000	0	0	0	0	0	0	1759.86	1	1	45.835	61.4737
DATA	397	5	57	0	0	A_64_P091163	NM_001107083	11309.6	213.427	6.218232e+001	7.577342e+000	132	61	1.223174e+001	0	0	0	0	0	0	54.1471	1	1	57.5363	60.6667
DATA	398	5	58	0	0	A_64_P133992	NM_001008825	11335.1	213.5	1.185319e+002	1.262587e+001	186	62	1.271953e+001	0	0	0	0	0	0	102.765	1	1	56.9804	58.5143
DATA	399	5	59	0	0	A_42_P503768	NM_001009466	11360.5	213.5	3.833591e+002	3.858398e+001	416	63	1.358844e+001	0	0	0	0	0	0	330.909	1	1	57.5363	64.2093
DATA	400	5	60	0	0	A_44_P400346	ENSRNOT00000059540	11385.7	213.5	6.116337e+001	7.527156e+000	135	65	1.212817e+001	0	0	0	0	0	0	52.5653	1	1	57.5363	65.3226
DATA	401	5	61	0	0	A_64_P128438	NM_012591	11410.5	214	2.740893e+003	2.741247e+002	2347	65	9.835344e+000	0	0	0	0	0	0	2345.71	1	1	48.5334	63.6552
DATA	402	5	62	0	0	A_44_P531758	NM_012935	11436.1	213.842	3.993931e+004	3.993933e+003	32946.5	60	1.258302e+001	0	0	0	0	0	0	34028.2	1	1	48.2044	61.9706
DATA	403	5	63	0	0	A_43_P10257	NM_203335	11461.3	213.9	8.184082e+003	8.184203e+002	6635.5	58	1.025278e+001	0	0	0	0	0	0	6942.46	1	1	47.2035	59.8235
DATA	404	5	64	0	0	A_64_P011744	NM_001108789	11487.5	213.5	3.829486e+002	3.855433e+001	407	57	9.945294e+000	0	0	0	0	0	0	323.355	1	1	57.5363	55.8621
DATA	405	5	65	0	0	A_44_P282794	NM_001107523	11512.7	213.5	3.775871e+001	5.862642e+000	111	65	1.467856e+001	0	0	0	0	0	0	31.7454	1	1	65	64.0909
DATA	406	5	66	0	0	A_42_P463784	NM_001008526	11537.8	214.362	1.302295e+003	1.303073e+002	1151	59	1.075907e+001	0	0	0	1	0	0	1090.44	1	1	46.5243	59
DATA	407	5	67	0	0	A_42_P630463	NM_022238	11562.9	214.172	4.358576e+002	4.381975e+001	440	56	1.133605e+001	0	0	0	0	0	0	363.396	1	1	45.4864	56.6154
DATA	408	5	68	0	0	A_64_P006728	NM_001108905	11588.4	214.104	3.313951e+003	3.314262e+002	2768	60	9.458041e+000	0	0	0	0	0	0	2751.22	1	1	46.5243	61
DATA	409	5	69	0	0	A_44_P360629	NM_001000030	11613.7	214.338	9.649181e+001	1.067259e+001	162	58.5	1.243159e+001	0	0	0	0	0	0	79.7796	1	1	46.1809	59.3125
DATA	410	5	70	0	0	A_64_P024620	NM_001006995	11639.1	214.175	1.790420e+004	1.790426e+003	14553.5	59.5	1.482194e+001	0	0	0	0	0	0	14742.2	1	1	45.4864	61.6471
DATA	411	5	71	0	0	A_64_P091194	ENSRNOT00000049254	11664.5	214.257	9.662951e+003	9.663061e+002	8045.5	65.5	1.136824e+001	0	0	0	0	0	0	7924.57	1	1	47.2035	62.9333
DATA	412	5	72	0	0	A_44_P334922	NM_022379	11690.5	213.5	9.824221e+000	4.720400e+000	91	64	1.026911e+001	0	0	0	0	0	0	8.02307	1	0	65	65
DATA	413	5	73	0	0	A_42_P482051	XM_001059157	11715.9	213.5	1.614440e+003	1.615105e+002	1340	64	1.730082e+001	0	0	0	1	0	0	1313.41	1	1	56.9804	70.5806
DATA	414	5	74	0	0	A_42_P674742	XM_002726367	11740.7	213.816	7.927552e+003	7.927689e+002	6356	69	1.522266e+001	0	0	0	0	0	0	6426.52	1	1	49.5074	68.963
DATA	415	5	75	0	0	A_64_P105211	XM_233310	11766.6	213.573	3.875163e+001	6.067383e+000	114.5	72	1.647197e+001	0	0	0	0	0	0	31.2972	1	1	65	74.7027
DATA	416	5	76	0	0	A_64_P058523	NM_134385	11792.1	213.5	2.040805e+001	5.110231e+000	98	81	2.346837e+001	0	0	0	0	1	0	16.4246	1	0	56.9804	84.5833
DATA	417	5	77	0	0	A_44_P586876	NM_001100805	11816.6	214.243	1.497759e+003	1.498496e+002	1223	84	1.998616e+001	0	0	0	0	1	0	1201.75	1	1	47.5395	83.0256
DATA	418	5	78	66	1	DarkCorner	DarkCorner	11842.9	213.5	4.731546e+000	4.715629e+000	79	66.5	1.803919e+001	0	0	0	0	0	0	-0.505131	0	0	56.9804	70.2727
DATA	419	5	79	66	1	DarkCorner	DarkCorner	11868.4	213.573	4.745837e+000	4.743207e+000	83	65	1.580241e+001	0	0	0	0	0	0	2.8334	0	0	57.5363	65.871
DATA	420	5	80	66	1	DarkCorner	DarkCorner	11892.2	214.561	4.757428e+000	4.741424e+000	79	61	1.401821e+001	0	0	0	0	0	0	-2.79062	0	0	45.4864	62.4074
DATA	421	5	81	66	1	DarkCorner	DarkCorner	11919.1	213.5	4.772074e+000	4.756021e+000	76	63	9.801690e+000	0	0	0	0	0	0	-4.23784	0	0	56.9804	60.8387
DATA	422	5	82	66	1	DarkCorner	DarkCorner	11944.5	213.5	4.783865e+000	4.767821e+000	83	61	1.076941e+001	0	0	0	0	0	0	0.17028	0	0	57.5363	59.8621
DATA	423	5	83	66	1	DarkCorner	DarkCorner	11969.4	212.958	4.795110e+000	4.786394e+000	81	59	1.011025e+001	0	0	0	0	0	0	2.10122	0	0	48.2044	61.7
DATA	424	5	84	66	1	DarkCorner	DarkCorner	11995	213.487	6.102285e+000	4.827005e+000	86	64.5	8.342934e+000	0	0	0	0	0	0	4.80528	1	0	48.8603	63.2632
DATA	425	5	85	66	1	DarkCorner	DarkCorner	12020.8	214.039	1.166595e+001	4.936324e+000	92.5	56	1.093261e+001	0	0	0	1	0	0	9.17069	1	0	49.1849	56.119
DATA	426	6	1	66	1	DarkCorner	DarkCorner	9900.42	220.427	4.160068e+000	4.146074e+000	76	54	1.200041e+001	0	0	0	0	0	0	-2.95462	0	0	57.5363	55.878
DATA	427	6	2	66	1	DarkCorner	DarkCorner	9925.58	220.427	4.142188e+000	4.128253e+000	74	60	1.467169e+001	0	0	0	0	0	0	-6.31235	0	0	57.5363	61.8824
DATA	428	6	3	66	1	DarkCorner	DarkCorner	9951.42	220.427	4.124782e+000	4.110906e+000	72.5	60	1.435965e+001	0	0	0	0	0	0	-5.02429	0	0	57.5363	61.7407
DATA	429	6	4	66	1	DarkCorner	DarkCorner	9975.51	221.236	4.108911e+000	4.095089e+000	70	53	9.241764e+000	0	0	0	0	0	0	-10.8694	0	0	42.2201	52.5686
DATA	430	6	5	66	1	DarkCorner	DarkCorner	10002	220.455	4.093453e+000	4.079683e+000	72	56	1.084046e+001	0	0	0	0	0	0	-8.40191	0	0	55.8519	56.8974
DATA	431	6	6	66	1	DarkCorner	DarkCorner	10027.5	220.097	4.079270e+000	4.065547e+000	74.5	58	9.999663e+000	0	0	0	0	0	0	-8.66254	0	0	43.7019	56.4872
DATA	432	6	7	66	1	DarkCorner	DarkCorner	10052.6	220.427	4.065772e+000	4.052095e+000	73	57.5	1.061131e+001	0	0	0	0	0	0	-7.55446	0	0	57.5363	58.8333
DATA	433	6	8	66	1	DarkCorner	DarkCorner	10078.4	220.427	4.053000e+000	4.039366e+000	66.5	54	9.012831e+000	0	0	0	0	0	0	-14.9413	0	0	65	55.4762
DATA	434	6	9	0	0	A_64_P034324	NM_001108282	10103.6	220.427	6.004032e+001	7.229935e+000	138	53	1.056059e+001	0	0	0	0	0	0	56.2051	1	1	65	54.6571
DATA	435	6	10	0	0	A_64_P071506	ENSRNOT00000025007	10128.9	220.477	1.530565e+001	4.298789e+000	95	57	1.183734e+001	0	0	0	0	0	0	14.3664	1	0	55.8519	57.2593
DATA	436	6	11	0	0	A_64_P050705	NM_001106061	10154.4	220.427	1.171262e+002	1.237914e+001	194.5	58	1.349485e+001	0	0	0	0	0	0	110.209	1	1	57.5363	57.9444
DATA	437	6	12	0	0	A_64_P032242	NM_001008898	10179.6	220.427	4.011767e+000	3.998271e+000	76.5	59	1.021804e+001	0	0	0	0	0	0	-4.98493	0	0	65	58.9429
DATA	438	6	13	0	0	A_42_P730320	NM_001013877	10205.1	220.5	4.323874e+001	5.883551e+000	123	58	1.137800e+001	0	0	0	0	0	0	40.8605	1	1	56.9804	58.7436
DATA	439	6	14	0	0	A_64_P123073	A_64_P123073	10230.5	220.5	2.742026e+002	2.770799e+001	340	65	1.162931e+001	0	0	0	0	0	0	259.596	1	1	57.5363	64.2813
DATA	440	6	15	0	0	A_64_P064709	NM_001166303	10255.9	220.5	4.443385e+001	5.962730e+000	125	55	1.039311e+001	0	0	0	0	0	0	42.1354	1	1	65	57.5714
DATA	441	6	16	0	0	A_44_P123381	NM_013012	10281.4	220.427	1.306394e+001	4.180006e+000	94	53	1.465417e+001	0	0	0	0	0	0	12.4057	1	0	57.5363	56.2432
DATA	442	6	17	0	0	A_44_P557487	NM_053617	10306.2	220.754	1.176232e+001	4.136470e+000	91	51.5	1.668956e+001	0	0	0	0	0	0	11.1835	1	0	45.1352	59.3077
DATA	443	6	18	0	0	A_64_P084971	NM_017007	10331.5	220.746	4.191323e+004	4.191325e+003	38996.5	61	1.480015e+001	0	0	0	0	0	0	39890.8	1	1	47.5395	62.4828
DATA	444	6	19	0	0	A_42_P770556	NM_033096	10357.2	220.725	6.172218e+003	6.172345e+002	5640	60	1.216758e+001	0	0	0	0	0	0	5879.18	1	1	50.1463	59.9487
DATA	445	6	20	0	0	A_64_P023381	XM_001073278	10382.7	220.5	3.367831e+001	5.195572e+000	115	63	1.252426e+001	0	0	0	0	0	0	32.0978	1	1	57.5363	64
DATA	446	6	21	0	0	A_64_P059217	NM_053667	10407.7	220.9	3.808572e+002	3.829046e+001	443	56.5	1.746619e+001	0	0	0	0	0	0	363.152	1	1	47.2035	63.0333
DATA	447	6	22	0	0	A_44_P286215	NM_001008885	10433.2	221.08	1.817959e+002	1.860449e+001	260.5	56.5	1.063711e+001	0	0	0	0	0	0	173.386	1	1	48.8603	58.325
DATA	448	6	23	0	0	A_64_P138056	A_64_P138056	10459.1	220.5	6.265374e+002	6.277837e+001	683	63.5	1.445677e+001	0	0	0	0	0	0	597.507	1	1	56.9804	63.0417
DATA	449	6	24	0	0	A_44_P280799	NM_001000654	10484.5	220.5	3.967838e+000	3.955047e+000	85	54	1.147540e+001	0	0	0	0	0	0	0.633358	0	0	65	57.5517
DATA	450	6	25	0	0	A_64_P111599	NM_001191586	10508.8	220.819	5.056452e+002	5.071901e+001	560	57	1.188380e+001	0	0	0	0	0	0	481.979	1	1	47.5395	56.2308
DATA	451	6	26	0	0	A_64_P088635	ENSRNOT00000059643	10535.3	220.5	2.238358e+001	4.547280e+000	103	57	1.549910e+001	0	0	0	0	0	0	21.3224	1	1	65	58.3191
DATA	452	6	27	0	0	A_64_P042332	NM_021860	10560.5	220.5	4.657844e+001	6.114440e+000	120	57	1.109038e+001	0	0	0	0	0	0	44.3371	1	1	65	54.6571
DATA	453	6	28	0	0	A_42_P599080	NM_053753	10585.9	220.5	7.036769e+001	8.076901e+000	151	60	1.297561e+001	0	0	0	0	0	0	66.9191	1	1	56.9804	60.5405
DATA	454	6	29	0	0	A_44_P576954	NM_001106645	10611.5	220.5	3.834361e+002	3.854851e+001	434	54	1.346241e+001	0	0	0	0	0	0	364.234	1	1	57.5363	54.3548
DATA	455	6	30	0	0	A_64_P046687	A_64_P046687	10635.9	221.254	4.225890e+003	4.226076e+002	3953.5	54	1.165808e+001	0	0	0	0	0	0	4009.8	1	1	45.835	53.8286
DATA	456	6	31	0	0	A_42_P694928	NM_001109046	10662.3	220.5	2.382944e+002	2.415958e+001	314	55	8.904253e+000	0	0	0	0	0	0	225.736	1	1	57.5363	54.7857
DATA	457	6	32	0	0	A_64_P032811	NM_001134575	10687.5	220.5	7.446956e+001	8.446993e+000	151.5	51.5	1.056568e+001	0	0	0	0	0	0	70.4305	1	1	57.5363	50.3095
DATA	458	6	33	0	0	A_64_P141070	ENSRNOT00000058701	10712.9	220.5	1.259586e+002	1.321392e+001	197	43	1.057632e+001	0	0	0	0	1	0	118.912	1	1	56.9804	43.4615
DATA	459	6	34	0	0	A_64_P093462	NM_001108129	10737.7	220.747	9.379225e+003	9.379310e+002	8550.5	46	8.809608e+000	0	0	0	0	1	0	8837.91	1	1	49.1849	47.6667
DATA	460	6	35	0	0	A_42_P799306	ENSRNOT00000015782	10763.6	220.573	1.162457e+002	1.229687e+001	184	49.5	1.052905e+001	0	0	0	0	0	0	109.296	1	1	57.5363	49.0333
DATA	461	6	36	0	0	A_42_P726743	NM_001108985	10788.3	220.985	1.151596e+003	1.152298e+002	1143	56	1.244861e+001	0	0	0	0	0	0	1080.43	1	1	45.4864	57.0303
DATA	462	6	37	0	0	A_44_P228341	NM_001025701	10813.7	221.056	2.627305e+003	2.627614e+002	2523	64	1.307371e+001	0	0	0	0	0	0	2458.98	1	1	47.5395	63.4595
DATA	463	6	38	0	0	A_42_P571433	NM_031059	10839.5	221.319	3.253728e+003	3.253978e+002	2991	97	3.537422e+001	0	0	0	0	1	0	3037.45	1	1	46.8651	97.9167
DATA	464	6	39	0	0	A_44_P132783	NM_214833	10865.4	220.573	1.150350e+002	1.219589e+001	191	112	3.437722e+001	0	0	0	0	1	0	107.076	1	1	65	119
DATA	465	6	40	0	0	A_44_P119215	NM_001108941	10890.6	220.573	3.687190e+001	5.486160e+000	115	78	2.275436e+001	0	0	0	0	1	0	34.2236	1	1	65	80.8049
DATA	466	6	41	0	0	A_44_P124259	XM_345871	10916.1	220.5	2.972474e+001	5.043641e+000	108	70	2.300675e+001	0	0	0	0	0	0	27.5064	1	1	56.9804	74.9783
DATA	467	6	42	0	0	A_44_P422063	NM_001107631	10941.5	220.5	9.720836e+001	1.054521e+001	171	67	1.238393e+001	0	0	0	0	0	0	89.6733	1	1	57.5363	64.1795
DATA	468	6	43	0	0	A_44_P1033023	NM_013063	10966	221.116	7.943447e+003	7.943552e+002	7235	72	1.837813e+001	0	0	0	0	0	0	7305.63	1	1	46.8651	70.5455
DATA	469	6	44	0	0	A_64_P121618	NM_001134542	10992.1	221.145	2.834732e+002	2.864427e+001	332	111	7.491228e+001	0	0	0	0	1	0	259.816	1	1	46.8651	143.25
DATA	470	6	45	0	0	A_64_P042188	ENSRNOT00000034890	11017.1	221.273	1.045550e+004	1.045558e+003	9633.5	78	9.272109e+001	0	0	1	0	1	0	9550.43	1	1	45.835	128.4
DATA	471	6	46	0	0	A_42_P561616	AI234869	11043	220.545	6.419022e+002	6.432382e+001	645	62.5	1.200747e+001	0	0	0	0	0	0	584.116	1	1	55.8519	62.6
DATA	472	6	47	0	0	A_42_P588606	NM_001134544	11067.7	221.042	2.301196e+002	2.338460e+001	292	62	1.316456e+001	0	0	0	0	0	0	208.676	1	1	47.2035	61.25
DATA	473	6	48	0	0	A_42_P568897	NM_001005563	11093.6	220.573	7.639456e+002	7.650853e+001	760.5	62.5	1.081658e+001	0	0	0	0	0	0	690.03	1	1	57.5363	62.9615
DATA	474	6	49	0	0	A_64_P096356	NM_012640	11118.6	220.87	2.713473e+004	2.713476e+003	24114	62	1.169384e+001	0	0	0	0	0	0	24417.4	1	1	46.8651	62.7353
DATA	475	6	50	0	0	A_64_P006418	A_64_P006418	11144.2	221.303	7.329304e+003	7.329424e+002	6676	55.5	1.082489e+001	0	0	0	0	0	0	6569.72	1	1	45.4864	57.1667
DATA	476	6	51	0	0	A_64_P156389	A_64_P156389	11170	220.545	8.718265e+001	9.687798e+000	158	54.5	1.126567e+001	0	0	0	0	0	0	77.8169	1	1	55.8519	55.2143
DATA	477	6	52	0	0	A_42_P576446	NM_001107673	11194.5	220.87	8.196789e+003	8.196899e+002	7262	61	1.014863e+001	0	0	0	0	0	0	7287.87	1	1	47.2035	63.4286
DATA	478	6	53	0	0	A_64_P022804	A_64_P022804	11220.4	221.271	1.470047e+003	1.470664e+002	1342	55	1.382113e+001	0	0	0	0	0	0	1301.63	1	1	47.5395	56.9032
DATA	479	6	54	0	0	A_64_P162356	A_64_P162356	11245.4	221.299	1.286675e+004	1.286682e+003	11214	56	1.243822e+001	0	0	0	0	0	0	11345.4	1	1	46.1809	57.069
DATA	480	6	55	0	0	A_44_P266776	NM_199388	11271.1	221.318	8.695038e+002	8.705637e+001	838	60	8.455231e+000	0	0	0	0	0	0	763.406	1	1	45.835	58.1563
DATA	481	6	56	0	0	A_64_P035066	NM_001008960	11297	220.545	1.990255e+001	4.751157e+000	100	61	1.212976e+001	0	0	0	0	0	0	17.3946	1	0	55.8519	61.2
DATA	482	6	57	0	0	A_64_P072728	NM_001100667	11321.4	221.177	7.818305e+003	7.818425e+002	6727	68	1.193064e+001	0	0	0	0	0	0	6805.55	1	1	43.7019	67.0667
DATA	483	6	58	0	0	A_64_P028446	NM_001106007	11346.8	221.03	2.775347e+003	2.775688e+002	2383	60	1.149690e+001	0	0	0	0	0	0	2405.25	1	1	46.1809	59.6486
DATA	484	6	59	0	0	A_44_P251212	NM_031715	11372.2	221.323	4.261264e+004	4.261266e+003	35603	61	1.241262e+001	0	0	0	0	0	0	36771.1	1	1	45.4864	64.6111
DATA	485	6	60	0	0	A_42_P818240	NM_001108334	11397.7	221.357	1.498899e+004	1.498905e+003	12599.5	65	1.172599e+001	0	0	0	0	0	0	12877.2	1	1	46.8651	65.5333
DATA	486	6	61	0	0	A_64_P023122	NM_001080208	11423.9	220.614	1.805719e+001	4.764993e+000	96	66	1.367128e+001	0	0	0	0	0	0	15.4403	1	0	57.259	66.3056
DATA	487	6	62	0	0	A_44_P217821	NM_001107292	11449.4	220.573	3.852848e+002	3.878223e+001	400.5	58	1.101809e+001	0	0	0	0	0	0	327.995	1	1	57.5363	60.1143
DATA	488	6	63	0	0	A_64_P007372	NM_001105895	11474.6	220.573	4.463461e+000	4.470058e+000	87	56	9.623837e+000	0	0	0	0	0	0	3.72127	0	0	57.5363	56.1852
DATA	489	6	64	0	0	A_42_P792382	NM_017257	11499.5	221.25	8.081924e+003	8.082047e+002	6727	65	1.213809e+001	0	0	0	0	0	0	6822.14	1	1	49.5074	63.2
DATA	490	6	65	0	0	A_43_P12232	NM_022512	11524.7	221.357	2.365417e+003	2.365843e+002	2013	59	1.240761e+001	0	0	0	0	0	0	1988.16	1	1	46.8651	61.1111
DATA	491	6	66	0	0	A_64_P158475	A_64_P158475	11550.2	221.359	7.019874e+003	7.020019e+002	5942	56	1.088198e+001	0	0	0	0	0	0	5874.89	1	1	44.7812	57.8378
DATA	492	6	67	0	0	A_64_P043361	NM_001197023	11576.4	220.573	8.005913e+001	9.196711e+000	149.5	55	1.029658e+001	0	0	0	0	0	0	66.6961	1	1	57.5363	56.6216
DATA	493	6	68	0	0	A_64_P080851	NM_001105753	11601.5	220.648	3.491731e+001	5.731202e+000	109	60	1.080304e+001	0	0	0	0	0	0	28.9694	1	1	57.5363	60.9375
DATA	494	6	69	0	0	A_44_P129330	NM_001107505	11627.1	220.614	1.368231e+003	1.368992e+002	1186	56	1.320008e+001	0	0	0	0	0	0	1130.44	1	1	57.259	57.6296
DATA	495	6	70	0	0	A_64_P008827	NM_001014012	11651.7	221.219	2.361079e+003	2.361523e+002	2002.5	60	1.474624e+001	0	0	0	0	0	0	1943.36	1	1	48.2044	61.5806
DATA	496	6	71	0	0	A_64_P026222	NM_001101019	11677.6	221.149	7.710616e+001	8.978358e+000	139.5	62	8.655127e+000	0	0	0	0	0	0	63.2069	1	1	45.835	62.7083
DATA	497	6	72	0	0	A_64_P067749	NM_012659	11703.1	221.211	4.247642e+004	4.247644e+003	34880	63	1.073735e+001	0	0	0	0	0	0	34685.2	1	1	47.8731	64.3429
DATA	498	6	73	0	0	A_44_P362981	NM_145878	11727.9	221.192	3.950613e+004	3.950616e+003	30810	69	1.488507e+001	0	0	0	0	0	0	32141	1	1	47.5395	71.5
DATA	499	6	74	0	0	A_64_P146654	NM_031698	11753.7	221.091	2.972315e+003	2.972679e+002	2454	69.5	1.303874e+001	0	0	0	0	0	0	2409.16	1	1	49.1849	70.1389
DATA	500	6	75	0	0	A_42_P548800	NM_001007696	11778.8	221	5.795776e+003	5.795964e+002	4659	83	1.798140e+001	0	0	0	0	1	0	4681.17	1	1	46.1809	80.45
DATA	501	6	76	0	0	A_44_P310581	BG673348	11804.3	221.3	4.523742e+003	4.523984e+002	3560.5	73	1.727403e+001	0	0	0	0	0	0	3641.56	1	1	46.8651	77.2727
DATA	502	6	77	0	0	A_64_P062269	XM_001067531	11829.4	221.357	1.989636e+002	2.044374e+001	244.5	73	2.013008e+001	0	0	0	0	0	0	159.65	1	1	47.2035	76.8529
DATA	503	6	78	66	1	DarkCorner	DarkCorner	11855.5	221	4.730368e+000	4.714455e+000	78	67	1.378247e+001	0	0	0	0	0	0	-1.0438	0	0	54.1152	68
DATA	504	6	79	66	1	DarkCorner	DarkCorner	11881	221	4.744324e+000	4.728364e+000	77	65	1.211177e+001	0	0	0	0	0	0	-4.55831	0	0	65	65.5152
DATA	505	6	80	66	1	DarkCorner	DarkCorner	11906.5	220.814	4.757681e+000	4.741676e+000	76	61	1.181000e+001	0	0	0	0	0	0	-7.79106	0	0	47.2035	62
DATA	506	6	81	66	1	DarkCorner	DarkCorner	11931.4	220.442	4.770122e+000	4.754075e+000	79	60	1.128865e+001	0	0	0	0	0	0	-1.84947	0	0	37.4241	59.4857
DATA	507	6	82	66	1	DarkCorner	DarkCorner	11956.9	220.682	4.781214e+000	4.765130e+000	79.5	64	1.340494e+001	0	0	0	0	0	0	-0.548022	0	0	36.9964	65.6857
DATA	508	6	83	66	1	DarkCorner	DarkCorner	11982.5	221	4.791279e+000	4.775161e+000	81.5	65.5	8.556149e+000	0	0	0	0	0	0	-1.46585	0	0	54.1152	64.35
DATA	509	6	84	66	1	DarkCorner	DarkCorner	12008	221	1.105342e+001	4.910484e+000	87	64	9.475680e+000	0	0	0	1	0	0	8.71103	1	0	54.9904	62.9333
DATA	510	6	85	66	1	DarkCorner	DarkCorner	12033	221	9.074918e+000	4.877672e+000	87	51	1.061620e+001	0	0	0	0	0	0	7.13979	1	0	46.8651	51.1263
DATA	511	7	1	66	1	DarkCorner	DarkCorner	9887.18	227.606	4.165205e+000	4.151193e+000	81	47	9.969336e+000	0	0	0	0	1	0	-0.044479	0	0	47.2035	47.7832
DATA	512	7	2	66	1	DarkCorner	DarkCorner	9912.44	228.261	4.146418e+000	4.132492e+000	80.5	58	1.108753e+001	0	0	0	0	0	0	0.124599	0	0	46.8651	59
DATA	513	7	3	66	1	DarkCorner	DarkCorner	9938.5	227.5	4.128905e+000	4.115016e+000	73	60	1.270937e+001	0	0	0	0	0	0	-7.20099	0	0	57.5363	60.4
DATA	514	7	4	66	1	DarkCorner	DarkCorner	9963.76	227.474	4.112407e+000	4.098572e+000	73	53.5	7.793883e+000	0	0	0	0	0	0	-8.43134	0	0	49.5074	53.2308
DATA	515	7	5	66	1	DarkCorner	DarkCorner	9989.42	227.573	4.096503e+000	4.082722e+000	78	54	9.447222e+000	0	0	0	0	0	0	-5.37907	0	0	57.5363	54.7143
DATA	516	7	6	66	1	DarkCorner	DarkCorner	10014.6	227.573	4.081865e+000	4.068133e+000	77	58	1.005370e+001	0	0	0	0	0	0	-3.97825	0	0	57.5363	58.5
DATA	517	7	7	66	1	DarkCorner	DarkCorner	10040.1	227.868	4.067729e+000	4.054045e+000	78	58	9.250664e+000	0	0	0	0	0	0	-3.89282	0	0	48.2044	56.8857
DATA	518	7	8	66	1	DarkCorner	DarkCorner	10064.3	228.667	4.054885e+000	4.041244e+000	71	55	9.027236e+000	0	0	0	0	0	0	-9.03957	0	0	39.4933	56.1892
DATA	519	7	9	0	0	A_64_P051297	NM_001107416	10090.3	228.029	4.035557e+003	4.035758e+002	3813	54	1.005872e+001	0	0	0	0	0	0	3776.44	1	1	46.1809	55.1053
DATA	520	7	10	0	0	A_64_P162378	A_64_P162378	10116.4	227.573	6.976410e+004	6.976411e+003	65670.5	55	1.162170e+001	0	0	0	0	0	0	65467.2	1	1	57.5363	55.3714
DATA	521	7	11	0	0	A_64_P030634	ENSRNOT00000042606	10141.1	228.092	6.913822e+001	7.991418e+000	146	56	1.320160e+001	0	0	0	0	0	0	65.0469	1	1	46.1809	56.2
DATA	522	7	12	0	0	A_64_P110009	NM_024392	10166.4	228	1.099612e+004	1.099619e+003	9989	58	1.283962e+001	0	0	0	0	0	0	10369.6	1	1	48.5334	59.5484
DATA	523	7	13	0	0	A_42_P618145	NM_001080783	10191.7	228.38	3.700279e+003	3.700494e+002	3551	57.5	1.314134e+001	0	0	0	0	0	0	3497.16	1	1	47.5395	57.85
DATA	525	7	15	0	0	A_64_P101770	NM_001000074	10243.4	227.573	1.243912e+001	4.165194e+000	94	64	1.391469e+001	0	0	0	0	0	0	11.799	1	0	57.5363	64.7838
DATA	526	7	16	0	0	A_42_P735934	NM_001105729	10267.8	228.359	4.393484e+003	4.393664e+002	4426	58	1.488021e+001	0	0	0	0	0	0	4174.01	1	1	44.7812	59.6
DATA	528	7	18	0	0	A_42_P718331	NM_133522	10319.4	227.573	1.655771e+003	1.656244e+002	1651	58	1.383593e+001	0	0	0	0	0	0	1576.78	1	1	57.5363	59.9583
DATA	529	7	19	0	0	A_64_P118054	NM_001037651	10344.6	227.573	1.316449e+001	4.169160e+000	95.5	60	1.346319e+001	0	0	0	0	0	0	12.5478	1	0	65	60.1515
DATA	530	7	20	0	0	A_64_P044613	A_64_P044613	10370.4	227.573	8.078334e+004	8.078335e+003	78697	61.5	1.058798e+001	0	0	0	0	0	0	77054.9	1	1	57.5363	61.9474
DATA	531	7	21	0	0	A_43_P13241	NM_134334	10394.9	228.435	2.867226e+004	2.867229e+003	27139	60	1.369645e+001	0	0	0	0	0	0	27366	1	1	46.1809	62.0303
DATA	532	7	22	0	0	A_44_P524748	NM_001000712	10421	227.545	5.750943e+000	3.991447e+000	86.5	60	1.560858e+001	0	0	0	0	0	0	5.48997	1	0	55.8519	61.0278
DATA	533	7	23	0	0	A_64_P126797	ENSRNOT00000048363	10446.4	227.573	9.573411e+001	1.035603e+001	172	58	1.122725e+001	0	0	0	0	0	0	91.4006	1	1	57.5363	60.6364
DATA	535	7	25	0	0	A_42_P730411	NM_001012181	10496.6	227.908	7.116710e+002	7.127666e+001	737.5	62	1.317662e+001	0	0	0	0	0	0	679.259	1	1	49.1849	60.3333
DATA	536	7	26	0	0	A_64_P049501	NM_001047970	10521.8	227.848	4.192519e+001	5.761763e+000	122.5	57	1.422649e+001	0	0	0	0	0	0	39.9973	1	1	50.1463	57.7381
DATA	537	7	27	0	0	A_42_P623688	NM_031031	10547	228.169	7.983843e+003	7.983941e+002	7293	60	1.651249e+001	0	0	0	0	0	0	7612.25	1	1	45.4864	60.9355
DATA	538	7	28	0	0	A_42_P601217	NM_053460	10572.4	228.299	1.737062e+002	1.781580e+001	254	58.5	1.188126e+001	0	0	0	0	0	0	165.488	1	1	46.1809	57.6053
DATA	540	7	30	0	0	A_42_P791872	NM_001135174	10623.3	228.357	1.012197e+004	1.012204e+003	9341.5	59	1.068392e+001	0	0	0	0	0	0	9622	1	1	46.8651	57.3478
DATA	542	7	32	0	0	A_44_P557172	NM_177936	10674.5	228.438	8.525005e+001	9.407475e+000	160	55	1.078829e+001	0	0	0	0	0	0	80.8035	1	1	47.8731	54.15
DATA	543	7	33	0	0	A_64_P118812	NM_001000512	10700.4	227.573	9.005236e+001	9.847797e+000	164	45	1.205314e+001	0	0	0	0	1	0	85.1941	1	1	57.5363	47.119
DATA	544	7	34	0	0	A_64_P019425	NM_172035	10725.5	227.648	3.280083e+002	3.304297e+001	355	48	1.152912e+001	0	0	0	0	0	0	309.742	1	1	57.5363	48.4286
DATA	545	7	35	0	0	A_42_P726743	NM_001108985	10750.3	228.147	9.231571e+002	9.240235e+001	955.5	48.5	9.319954e+000	0	0	0	0	0	0	870.092	1	1	48.8603	49.3077
DATA	546	7	36	0	0	A_42_P558703	NM_001106810	10776	228.028	7.182131e+002	7.193314e+001	750	48	1.223647e+001	0	0	0	0	0	0	675.419	1	1	46.8651	51.7419
DATA	547	7	37	0	0	A_42_P619806	TC590118	10801.3	228.329	6.252654e+002	6.265555e+001	659	59	9.680803e+000	0	0	0	0	0	0	586.666	1	1	47.5395	59.4444
DATA	548	7	38	0	0	A_64_P072247	XM_001055615	10827.4	227.931	5.125780e+001	6.519841e+000	135	63.5	1.609969e+001	0	0	0	0	0	0	47.9671	1	1	53.8203	63.6667
DATA	549	7	39	0	0	A_64_P104164	A_64_P104164	10851.8	228.212	3.477306e+004	3.477309e+003	32923.5	109	3.059291e+001	0	0	0	0	1	0	32460	1	1	45.835	112.594
DATA	550	7	40	0	0	A_42_P672103	NM_021770	10877.2	228.118	2.775353e+004	2.775356e+003	25093.5	111	5.046514e+001	0	0	0	0	1	0	25835	1	1	50.1463	126.765
DATA	551	7	41	0	0	A_64_P090942	NM_001000406	10903	229.018	2.377757e+001	4.706657e+000	101.5	100.5	3.094155e+001	0	0	0	0	1	0	22.0722	1	1	41.8414	102.1
DATA	552	7	42	0	0	A_64_P149491	ENSRNOT00000025458	10927.8	228.149	7.989491e+001	8.968538e+000	154	62	1.254495e+001	0	0	0	0	0	0	73.9325	1	1	46.1809	64.2955
DATA	553	7	43	0	0	A_42_P552441	NR_002704	10953.4	228	2.135025e+004	2.135029e+003	18927	67	1.054794e+001	0	0	0	0	0	0	19693.5	1	1	48.5334	63.2917
DATA	554	7	44	0	0	A_64_P060419	ENSRNOT00000055060	10979.5	228	4.115468e+000	4.110120e+000	85	76	6.290507e+001	0	0	1	0	1	0	2.42829	0	0	54.1152	102.951
DATA	555	7	45	0	0	A_44_P161233	NM_019165	11005	228	1.272539e+003	1.273205e+002	1212	141	9.302438e+001	0	0	1	0	1	0	1165.83	1	1	54.9904	159.371
DATA	556	7	46	66	-1	(-)3xSLv1	NegativeControl	11030.5	228	4.144179e+000	4.130238e+000	79	63	1.604152e+001	0	0	0	0	0	0	-3.73927	0	0	54.1152	63.9459
DATA	557	7	47	0	0	A_43_P12519	NM_031114	11054.9	228.232	1.289106e+004	1.289113e+003	11349	61	1.293408e+001	0	0	0	0	0	0	11728.2	1	1	46.1809	61.9048
DATA	558	7	48	0	0	A_44_P317600	NM_012612	11080.3	228.139	5.593251e+002	5.608699e+001	573	62.5	1.935477e+001	0	0	0	0	0	0	506.974	1	1	47.8731	67.6176
DATA	559	7	49	0	0	A_64_P034166	A_64_P034166	11106.5	228	9.616803e+000	4.285718e+000	91	67.5	1.136381e+001	0	0	0	0	0	0	8.68224	1	0	65	65.8929
DATA	560	7	50	0	0	A_64_P024585	NM_001109337	11132	228	7.732597e+000	4.263505e+000	89.5	59	1.325081e+001	0	0	0	0	0	0	6.95388	1	0	65	62.1622
DATA	561	7	51	0	0	A_42_P654682	NM_012724	11157.5	228	1.426031e+001	4.444550e+000	92	50	8.714039e+000	0	0	0	0	0	0	12.7731	1	0	54.1152	51.5313
DATA	562	7	52	0	0	A_42_P524610	NM_001108992	11182.2	228.123	2.547940e+003	2.548291e+002	2289.5	61.5	1.299822e+001	0	0	0	0	0	0	2273.32	1	1	47.5395	61.0769
DATA	563	7	53	0	0	A_64_P046677	NM_020093	11208	228	1.960975e+001	4.675027e+000	98	60.5	1.052102e+001	0	0	0	0	0	0	17.4227	1	0	54.9904	60.6071
DATA	564	7	54	0	0	A_64_P042742	XM_001061779	11233.5	228	5.045742e+002	5.063707e+001	528	58.5	1.020596e+001	0	0	0	0	0	0	446.425	1	1	54.1152	57.1923
DATA	565	7	55	0	0	A_64_P058430	ENSRNOT00000062073	11258.5	228.143	1.504062e+001	4.535988e+000	96	55	1.134818e+001	0	0	0	0	0	0	13.2523	1	0	44.0646	55.8438
DATA	566	7	56	0	0	A_42_P479251	NM_001108686	11283.6	228.338	7.917180e+003	7.917297e+002	6782.5	59	9.364426e+000	0	0	0	0	0	0	6946.83	1	1	47.8731	59.3226
DATA	567	7	57	0	0	A_42_P777329	NM_001106943	11309	228.075	6.548240e+002	6.562449e+001	630	66.5	1.016166e+001	0	0	0	0	0	0	572.063	1	1	46.8651	65
DATA	568	7	58	0	0	A_64_P103414	NM_001106472	11335	228	1.686343e+001	4.651798e+000	94	63	1.491731e+001	0	0	0	0	0	0	14.6665	1	0	65	63.3429
DATA	569	7	59	0	0	A_64_P082164	A_64_P082164	11360.5	228	9.389872e+001	1.035040e+001	163	59	1.177099e+001	0	0	0	0	0	0	81.3083	1	1	54.1152	59.4878
DATA	570	7	60	0	0	A_42_P702729	NM_001107557	11385.6	228.069	1.998664e+003	1.999143e+002	1768	67.5	1.268649e+001	0	0	0	0	0	0	1723.22	1	1	53.8203	66.4667
DATA	571	7	61	0	0	A_64_P130922	A_64_P130922	11410.4	228.27	4.919553e+002	4.939118e+001	495	65	1.048822e+001	0	0	0	0	0	0	422.362	1	1	47.8731	65.8148
DATA	572	7	62	0	0	A_42_P509843	NM_001100480	11435.9	228.348	8.034879e+002	8.046979e+001	769	58.5	1.256777e+001	0	0	0	0	0	0	686.803	1	1	45.835	61.381
DATA	573	7	63	0	0	A_64_P110759	A_64_P110759	11462	228.319	4.957593e+001	6.649251e+000	125	58	1.145714e+001	0	0	0	0	0	0	42.1855	1	1	58.0869	58.3684
DATA	574	7	64	0	0	A_64_P006235	A_64_P006235	11487.5	228.352	8.045128e+002	8.057429e+001	753	57	1.115106e+001	0	0	0	0	0	0	681.593	1	1	57.5363	59.1154
DATA	575	7	65	0	0	A_44_P506064	NM_001191778	11512.4	228.576	4.972514e+001	6.685855e+000	121	60	1.275552e+001	0	0	0	0	0	0	41.9509	1	1	42.5954	60.6452
DATA	576	7	66	0	0	A_64_P075425	A_64_P075425	11537.4	228.37	1.202230e+004	1.202238e+003	10026	59	1.269357e+001	0	0	0	0	0	0	10099.3	1	1	48.2044	59.72
DATA	577	7	67	0	0	A_42_P544898	NM_001108279	11563.2	228.486	6.074526e+001	7.564471e+000	134	56	1.046905e+001	0	0	0	0	0	0	50.8092	1	1	49.1849	57.6429
DATA	578	7	68	0	0	A_44_P837192	ENSRNOT00000038251	11588.9	228.386	2.229337e+001	5.046396e+000	97	61	1.001145e+001	0	0	0	0	0	0	18.5672	1	0	57.259	59.7941
DATA	580	7	70	0	0	A_44_P325657	NM_001014007	11639.2	228.313	1.709395e+002	1.769285e+001	220	60	1.368556e+001	0	0	0	0	0	0	141.209	1	1	45.835	61.8065
DATA	581	7	71	0	0	A_64_P004598	ENSRNOT00000024034	11664.7	228.413	3.597901e+002	3.626969e+001	372	57	1.015324e+001	0	0	0	0	0	0	296.025	1	1	48.8603	55.6296
DATA	582	7	72	0	0	A_42_P607183	XM_001081723	11690.5	228.352	1.738435e+003	1.739044e+002	1579.5	58	1.125713e+001	0	0	0	0	0	0	1424.64	1	1	57.5363	61.3667
DATA	584	7	74	0	0	A_42_P589190	NM_023104	11740.6	228.438	8.321296e+002	8.334196e+001	734.5	69	1.283048e+001	0	0	0	0	0	0	676.89	1	1	48.2044	69.3939
DATA	585	7	75	0	0	A_42_P757323	TC587630	11765.7	228.348	5.178922e+003	5.179131e+002	4138.5	76	1.608337e+001	0	0	0	0	0	0	4197.71	1	1	47.2035	73.8529
DATA	586	7	76	0	0	A_42_P688320	NM_001108569	11792.1	228.386	2.245831e+002	2.293844e+001	260	80	1.595000e+001	0	0	0	0	0	0	181.381	1	1	57.259	76.6739
DATA	587	7	77	0	0	A_44_P224705	NM_031002	11817.5	228.352	1.240984e+002	1.326448e+001	178	72	2.066320e+001	0	0	0	0	0	0	99.8921	1	1	57.5363	78.697
DATA	588	7	78	0	0	A_42_P481849	NM_001100563	11842.1	228.61	1.831929e+003	1.832532e+002	1540	67.5	1.564502e+001	0	0	0	0	0	0	1470.14	1	1	49.8279	70.05
DATA	589	7	79	66	1	DarkCorner	DarkCorner	11868.4	228.427	4.729263e+000	4.713354e+000	79	68	1.293910e+001	0	0	0	0	0	0	-2.79587	0	0	57.5363	67.9565
DATA	590	7	80	66	1	DarkCorner	DarkCorner	11893.6	228.427	5.060685e+000	4.753685e+000	83	61	1.162515e+001	0	0	0	0	0	0	4.03701	1	0	57.5363	61.5405
DATA	591	7	81	66	1	DarkCorner	DarkCorner	11918.5	227.911	4.755637e+000	4.746930e+000	84	62.5	1.380704e+001	0	0	0	0	0	0	2.09238	0	0	42.9674	63.5263
DATA	592	7	82	66	1	DarkCorner	DarkCorner	11944.4	228.427	5.773134e+000	4.786001e+000	85	60	1.284837e+001	0	0	0	0	0	0	4.58171	1	0	57.5363	61.3415
DATA	593	7	83	66	1	DarkCorner	DarkCorner	11969.6	228.315	4.777963e+000	4.762091e+000	80.5	62	1.046655e+001	0	0	0	0	0	0	0.347177	0	0	52.3208	62.3
DATA	594	7	84	66	1	DarkCorner	DarkCorner	11995.4	228.427	5.054803e+000	4.798424e+000	86	65.5	9.787682e+000	0	0	0	0	0	0	3.99424	1	0	57.5363	65.6579
DATA	595	7	85	66	1	DarkCorner	DarkCorner	12020	228.526	4.796211e+000	4.789181e+000	84.5	53.5	1.461647e+001	0	0	0	0	0	0	2.32835	0	0	49.8279	54.3125
DATA	596	8	1	66	1	DarkCorner	DarkCorner	9900.5	235	4.150676e+000	4.136712e+000	79	57	1.383150e+001	0	0	0	0	0	0	-2.65915	0	0	54.1152	58.85
DATA	597	8	2	66	1	DarkCorner	DarkCorner	9925.35	234.326	4.133552e+000	4.119646e+000	77.5	60	1.192509e+001	0	0	0	0	0	0	-5.41548	0	0	39.0882	58.2821
DATA	598	8	3	66	1	DarkCorner	DarkCorner	9951.88	235.122	4.115287e+000	4.101443e+000	71	58	1.229617e+001	0	0	0	0	0	0	-9.01595	0	0	36.1258	60.0645
DATA	599	8	4	66	1	DarkCorner	DarkCorner	9976.5	235	4.099769e+000	4.085977e+000	71	54	7.333102e+000	0	0	0	0	0	0	-10.0814	0	0	54.1152	53.9756
DATA	600	8	5	66	1	DarkCorner	DarkCorner	10002	235	4.084519e+000	4.070778e+000	71	54.5	1.055098e+001	0	0	0	0	0	0	-7.65035	0	0	54.9904	55.6
DATA	601	8	6	66	1	DarkCorner	DarkCorner	10027.6	235.889	4.069582e+000	4.055892e+000	73.5	58	1.009416e+001	0	0	0	0	0	0	-7.31666	0	0	37.847	57.9487
DATA	602	8	7	66	1	DarkCorner	DarkCorner	10052.5	235	4.056990e+000	4.043342e+000	70	61.5	1.051753e+001	0	0	0	0	0	0	-9.41771	0	0	65	58.75
DATA	603	8	8	0	0	A_44_P487081	NM_001033951	10077.3	235.284	5.984144e+002	5.997706e+001	641	54	9.626197e+000	0	0	0	0	0	0	559.751	1	1	45.4864	55.9459
DATA	604	8	9	0	0	A_64_P054403	NM_001170340	10103.5	235	1.450115e+002	1.504783e+001	222	55	1.136453e+001	0	0	0	0	0	0	136.041	1	1	54.1152	55.439
DATA	605	8	10	0	0	A_44_P665685	NM_001109325	10129	235	4.656030e+000	4.035367e+000	88	57	1.482125e+001	0	0	0	0	0	0	4.37974	1	0	65	59.1481
DATA	606	8	11	0	0	A_42_P531684	NM_001014215	10154.5	235	2.516072e+002	2.547646e+001	312.5	56	1.461581e+001	0	0	0	0	0	0	237.263	1	1	54.1152	57.7143
DATA	607	8	12	0	0	A_42_P722904	ENSRNOT00000006525	10179	235.118	2.639418e+003	2.639720e+002	2493	59	1.349147e+001	0	0	0	0	0	0	2494.41	1	1	46.8651	58.6552
DATA	608	8	13	0	0	A_42_P514057	NM_031839	10205	235	1.384904e+001	4.215451e+000	94	57	1.301894e+001	0	0	0	0	0	0	13.1154	1	0	54.9904	58.4651
DATA	609	8	14	0	0	A_64_P087459	A_64_P087459	10229.9	235.363	9.899449e+004	9.899450e+003	94548	63	1.201968e+001	0	0	0	0	0	0	93925.1	1	1	48.8603	63.4894
DATA	610	8	15	0	0	A_42_P581060	NM_001108722	10255.1	235.288	1.149280e+004	1.149286e+003	10598	55	1.426095e+001	0	0	0	0	0	0	10921.9	1	1	47.5395	60.7333
DATA	611	8	16	0	0	A_42_P658220	NM_001109598	10280.3	235.246	2.519530e+003	2.519842e+002	2478	58	1.265954e+001	0	0	0	0	0	0	2397.76	1	1	45.1352	58.1714
DATA	612	8	17	0	0	A_42_P758454	NM_001108101	10306.5	235	2.750134e+002	2.778458e+001	338	55	1.230057e+001	0	0	0	0	0	0	262.044	1	1	54.1152	56.1944
DATA	613	8	18	0	0	A_64_P140956	NM_001013141	10331.3	235.224	4.326835e+002	4.344856e+001	481.5	52.5	1.350979e+001	0	0	0	0	0	0	412.705	1	1	45.835	56.5833
DATA	614	8	19	0	0	A_42_P508984	NM_001007729	10357	235.261	1.615116e+003	1.615599e+002	1629	63	1.374302e+001	0	0	0	0	0	0	1541.83	1	1	46.1809	62.2444
DATA	615	8	20	0	0	A_42_P619008	NM_001013079	10382.1	235.313	4.996976e+003	4.997132e+002	4727	59	1.111905e+001	0	0	0	0	0	0	4773.21	1	1	45.835	59.4333
DATA	616	8	21	0	0	A_64_P058351	NM_017101	10407.9	235.329	9.386559e+004	9.386560e+003	89737	59	1.406276e+001	0	0	0	0	0	0	89701.1	1	1	47.8731	63.2353
DATA	617	8	22	0	0	A_64_P083800	XM_001058776	10432.8	235.368	1.012006e+002	1.086169e+001	177.5	59	1.366831e+001	0	0	0	0	0	0	96.7326	1	1	46.5243	61.875
DATA	618	8	23	0	0	A_64_P028088	NM_001106073	10458.6	235.471	6.040778e+002	6.053643e+001	650.5	60	1.461631e+001	0	0	0	0	0	0	577.436	1	1	45.835	64.3548
DATA	619	8	24	0	0	A_44_P105441	ENSRNOT00000042202	10483.6	235.444	1.893282e+004	1.893286e+003	18142	61	1.804788e+001	0	0	0	0	0	0	18094.8	1	1	48.2044	62.625
DATA	620	8	25	0	0	A_42_P675802	NM_145777	10509.3	235.186	1.989330e+003	1.989721e+002	1949	58	1.281586e+001	0	0	0	0	0	0	1900.53	1	1	47.2035	56.3846
DATA	621	8	26	0	0	A_64_P018525	ENSRNOT00000027134	10535.4	235.427	4.365166e+002	4.382990e+001	502	60	1.545766e+001	0	0	0	0	0	0	416.813	1	1	57.5363	62.4242
DATA	622	8	27	0	0	A_42_P749382	NM_001106731	10559.7	235.222	9.352798e+003	9.352881e+002	8829	59	1.204900e+001	0	0	0	0	0	0	8924.12	1	1	47.5395	58.6129
DATA	623	8	28	0	0	A_44_P316364	NM_001077675	10585.9	235.386	9.702113e+000	4.072543e+000	91.5	57	1.211749e+001	0	0	0	0	0	0	9.24899	1	0	57.259	57.3684
DATA	624	8	29	0	0	A_64_P143596	ENSRNOT00000060139	10611.5	235.352	1.250381e+002	1.311581e+001	203.5	49	8.247994e+000	0	0	0	0	0	0	119.066	1	1	65	48.9706
DATA	625	8	30	0	0	A_42_P468723	NM_001191689	10636.1	235.603	6.405263e+002	6.417520e+001	699	49	1.010114e+001	0	0	0	0	0	0	609.211	1	1	48.5334	50.4595
DATA	626	8	31	0	0	A_42_P533792	NM_001106575	10661.4	235.873	7.793603e+003	7.793704e+002	7216	52	1.113136e+001	0	0	0	0	0	0	7402.32	1	1	47.5395	51.5833
DATA	627	8	32	0	0	A_43_P16773	XM_217313	10687	235.698	6.046585e+002	6.059646e+001	652.5	50	1.025064e+001	0	0	0	0	0	0	573.351	1	1	41.4593	49.75
DATA	628	8	33	0	0	A_42_P765830	NM_001106426	10712.5	235.5	1.318926e+004	1.318932e+003	12604	50.5	1.096214e+001	0	0	0	1	0	0	12483.7	1	1	49.1849	49.2059
DATA	629	8	34	0	0	A_43_P15073	ENSRNOT00000030771	10738.4	235.427	1.126155e+002	1.194804e+001	184.5	50	1.065773e+001	0	0	0	0	0	0	106.379	1	1	65	50.5714
DATA	630	8	35	0	0	A_42_P538527	NM_001108885	10763.3	235.684	6.745512e+002	6.757360e+001	701.5	47.5	8.942651e+000	0	0	0	1	0	0	635.913	1	1	49.5074	48.1667
DATA	631	8	36	0	0	A_64_P037130	A_64_P037130	10789.1	235.407	4.022593e+000	4.009061e+000	82	52.5	1.301829e+001	0	0	0	0	0	0	-0.256233	0	0	56.9804	52.8
DATA	632	8	37	0	0	A_44_P536115	NM_023957	10813.4	235.608	3.202454e+003	3.202706e+002	2943.5	56	1.481751e+001	0	0	0	0	0	0	3005.12	1	1	49.1849	59.3243
DATA	633	8	38	0	0	A_43_P11800	NM_017059	10839.9	235.407	2.804995e+002	2.833783e+001	338.5	71	2.334510e+001	0	0	0	0	0	0	262.508	1	1	56.9804	75.0789
DATA	634	8	39	0	0	A_64_P004922	NM_001191924	10865.4	235.427	1.227681e+003	1.228346e+002	1191	111.5	4.698822e+001	0	0	0	0	1	0	1145.83	1	1	57.5363	128.529
DATA	635	8	40	0	0	A_64_P145058	NM_001107951	10890.1	235.571	1.240051e+003	1.240712e+002	1198	119	4.419813e+001	0	0	0	0	1	0	1154.22	1	1	49.8279	130.476
DATA	636	8	41	0	0	A_64_P075372	A_64_P075372	10916	235.455	4.167732e+001	5.820696e+000	119	93	3.382455e+001	0	0	0	0	1	0	38.6745	1	1	55.8519	97
DATA	637	8	42	0	0	A_64_P118792	NM_001107034	10941.4	235.427	3.540250e+001	5.398766e+000	115	66	1.258856e+001	0	0	0	0	0	0	32.75	1	1	57.5363	65.6829
DATA	638	8	43	0	0	A_42_P469685	NM_001100532	10965.9	235.618	4.830123e+003	4.830296e+002	4352.5	72.5	1.600893e+001	0	0	0	0	0	0	4454.54	1	1	46.1809	68.7143
DATA	639	8	44	0	0	A_42_P759822	NM_001109673	10992.4	235.427	6.364748e+002	6.377958e+001	672	141.5	7.935963e+001	0	0	0	0	1	0	584.926	1	1	57.5363	142.719
DATA	640	8	45	0	0	A_64_P014687	NM_012650	11017.1	236.145	1.091411e+004	1.091419e+003	10271	60	1.163458e+001	0	0	0	0	0	0	9997.95	1	1	45.4864	59.619
DATA	641	8	46	0	0	A_43_P18505	NM_001012010	11043	235.455	6.847558e+001	7.997422e+000	144.5	59	1.247965e+001	0	0	0	0	0	0	62.4926	1	1	55.8519	61.3784
DATA	642	8	47	0	0	A_43_P12580	NM_031548	11068.4	235.427	1.721904e+002	1.771131e+001	240	64	1.667928e+001	0	0	0	0	0	0	156.571	1	1	57.5363	66.9615
DATA	643	8	48	0	0	A_64_P052980	NM_001014786	11093.6	235.427	2.291604e+001	4.751312e+000	104	68	1.791269e+001	0	0	0	0	0	0	20.76	1	1	65	68.3103
DATA	644	8	49	0	0	A_64_P397764	ENSRNOT00000028709	11118.7	235.527	5.365727e+002	5.381968e+001	564	58.5	1.114714e+001	0	0	0	0	0	0	484.259	1	1	49.1849	60.5
DATA	645	8	50	0	0	A_64_P048408	NM_001008858	11144.6	235.427	9.743963e+001	1.060851e+001	165	56.5	1.283103e+001	0	0	0	0	0	0	87.5869	1	1	57.5363	57.925
DATA	647	8	52	0	0	A_64_P059500	ENSRNOT00000043917	11195.4	235.427	4.242993e+000	4.239314e+000	84.5	56	1.174289e+001	0	0	0	0	0	0	2.67064	0	0	57.5363	57.9667
DATA	648	8	53	0	0	A_64_P220198	AW917371	11220.6	235.427	2.319452e+001	4.838279e+000	100	59	1.290769e+001	0	0	0	0	0	0	20.597	1	1	57.5363	59.5862
DATA	649	8	54	0	0	A_64_P109764	NM_001007756	11245.4	235.873	4.139428e+002	4.161322e+001	447	58.5	1.124789e+001	0	0	0	0	0	0	366.121	1	1	47.5395	57.4688
DATA	650	8	55	0	0	A_64_P142685	NM_001130498	11271.5	235.5	2.360215e+001	4.889407e+000	102.5	55	1.212455e+001	0	0	0	0	0	0	20.783	1	1	57.5363	56.2692
DATA	651	8	56	0	0	A_44_P395709	NM_134366	11296.4	236.13	1.353359e+003	1.354041e+002	1246	60	1.215478e+001	0	0	0	0	0	0	1186.88	1	1	46.8651	60.3636
DATA	652	8	57	0	0	A_64_P165071	NM_001110165	11321.5	235.614	1.199389e+004	1.199397e+003	10173	70	1.701201e+001	0	0	0	0	0	0	10472.5	1	1	47.5395	68.6571
DATA	653	8	58	0	0	A_64_P009147	ENSRNOT00000042587	11347	235.667	8.907606e+001	9.907380e+000	159	60	1.359880e+001	0	0	0	0	0	0	77.4398	1	1	50.7771	61.7895
DATA	654	8	59	0	0	A_42_P647072	NM_178102	11372.4	235.873	1.838067e+003	1.838583e+002	1661	59.5	9.789207e+000	0	0	0	0	0	0	1591.08	1	1	47.5395	58.3333
DATA	655	8	60	0	0	A_64_P125585	XM_001063000	11398.5	235.5	2.120459e+001	4.862572e+000	97	71	6.101481e+000	0	0	0	0	0	0	18.2714	1	0	57.5363	70.3158
DATA	656	8	61	0	0	A_42_P610317	NM_001108225	11423.2	235.74	7.034771e+003	7.034908e+002	5703.5	61	1.330172e+001	0	0	0	0	0	0	6036.2	1	1	48.5334	62.9167
DATA	657	8	62	0	0	A_42_P755831	NM_152935	11448.4	235.973	2.413476e+004	2.413480e+003	19417	61.5	1.319664e+001	0	0	0	0	0	0	20620.1	1	1	48.5334	61.55
DATA	659	8	64	0	0	A_44_P386375	NM_053842	11499.4	236.138	5.628771e+002	5.646348e+001	559	62	1.177906e+001	0	0	0	0	0	0	476.744	1	1	45.4864	61.8846
DATA	660	8	65	0	0	A_43_P15565	NM_023953	11525.5	235.5	2.188535e+001	4.979031e+000	102	58	1.214337e+001	0	0	0	0	0	0	18.4516	1	0	65	61
DATA	661	8	66	0	0	A_42_P456701	NM_001009697	11550.1	236.177	1.157520e+003	1.158390e+002	1029	63	1.193610e+001	0	0	0	0	0	0	972.01	1	1	45.1352	61.5517
DATA	662	8	67	0	0	A_43_P20388	ENSRNOT00000061333	11575.4	236.106	9.848321e+002	9.858639e+001	878	56	1.030787e+001	0	0	0	0	0	0	823.507	1	1	45.4864	56.4286
DATA	663	8	68	0	0	A_44_P572504	TC585660	11601.1	236.175	3.986605e+002	4.012240e+001	411.5	63	1.072459e+001	0	0	0	0	0	0	331.958	1	1	45.4864	62.4286
DATA	664	8	69	0	0	A_64_P059964	NM_001013858	11626.4	236	4.133537e+003	4.133787e+002	3442	63	1.416931e+001	0	0	0	0	0	0	3427.7	1	1	48.5334	63.6667
DATA	665	8	70	0	0	A_44_P1056293	ENSRNOT00000022862	11652.3	236.029	2.237777e+003	2.238243e+002	1929	55	1.146552e+001	0	0	0	0	0	0	1848.04	1	1	46.1809	55.3793
DATA	666	8	71	0	0	A_64_P133276	NM_001107464	11677.5	236.116	6.657642e+002	6.673402e+001	630	59	1.411612e+001	0	0	0	0	0	0	547.665	1	1	47.5395	62.087
DATA	667	8	72	0	0	A_42_P667782	NM_001009673	11702.3	236.167	1.314313e+003	1.315118e+002	1141	64	1.495805e+001	0	0	0	1	0	0	1077.11	1	1	45.835	67.0811
DATA	668	8	73	0	0	A_64_P023624	A_64_P023624	11728.1	235.896	4.684213e+002	4.706930e+001	463	63	1.181133e+001	0	0	0	0	0	0	382.393	1	1	46.8651	63.8485
DATA	669	8	74	0	0	A_64_P110130	NM_001106172	11754	235.545	6.635957e+002	6.652134e+001	621.5	77	1.552881e+001	0	0	0	0	0	0	539.664	1	1	55.8519	77.6098
DATA	670	8	75	0	0	A_64_P087728	XM_001078778	11778.7	236.362	1.933312e+002	1.988482e+001	234	78	1.393468e+001	0	0	0	0	0	0	156.717	1	1	46.5243	75.3333
DATA	671	8	76	0	0	A_44_P475356	NM_001177823	11803.8	236.365	2.614880e+002	2.656205e+001	294.5	75.5	1.504640e+001	0	0	0	0	0	0	211.253	1	1	44.7812	75.1563
DATA	672	8	77	0	0	A_42_P560984	NM_001109179	11829.4	236.265	1.519487e+004	1.519494e+003	11744	68	1.760472e+001	0	0	0	0	0	0	12235.3	1	1	46.5243	72.6364
DATA	673	8	78	0	0	A_42_P566906	NM_001006966	11854.6	236.29	5.013903e+003	5.014123e+002	3982	66	1.443961e+001	0	0	0	0	0	0	4024.94	1	1	46.8651	65.439
DATA	674	8	79	66	1	DarkCorner	DarkCorner	11881	235.545	4.728133e+000	4.713025e+000	79.5	68	1.285216e+001	0	0	0	0	0	0	0.694033	0	0	55.8519	68.9231
DATA	675	8	80	66	1	DarkCorner	DarkCorner	11906.4	235.573	4.741177e+000	4.725227e+000	77.5	61	1.308451e+001	0	0	0	0	0	0	-3.51431	0	0	57.5363	63.975
DATA	676	8	81	66	1	DarkCorner	DarkCorner	11931.6	235.573	4.753284e+000	4.737294e+000	77	61.5	1.513287e+001	0	0	0	0	0	0	-4.62503	0	0	57.5363	64.2955
DATA	677	8	82	66	1	DarkCorner	DarkCorner	11957.3	235.5	4.764833e+000	4.748803e+000	78	61.5	1.219118e+001	0	0	0	0	0	0	-4.34753	0	0	57.5363	63.9048
DATA	678	8	83	66	1	DarkCorner	DarkCorner	11982.1	235.642	4.774753e+000	4.758691e+000	79	64	1.105838e+001	0	0	0	0	0	0	-1.4695	0	0	50.1463	64.1277
DATA	679	8	84	66	1	DarkCorner	DarkCorner	12007.9	235.523	4.784380e+000	4.768285e+000	78	64.5	1.004450e+001	0	0	0	0	0	0	-0.585106	0	0	55.8519	64.7333
DATA	680	8	85	66	1	DarkCorner	DarkCorner	12032.4	235.81	4.792006e+000	4.780896e+000	85	50	1.000667e+001	0	0	0	0	0	0	1.72754	0	0	51.4001	49.6694
DATA	681	9	1	66	1	DarkCorner	DarkCorner	9886.42	242.305	4.156327e+000	4.152156e+000	79	51	1.154785e+001	0	0	0	0	0	0	2.59669	0	0	42.5954	51.5281
DATA	682	9	2	66	1	DarkCorner	DarkCorner	9913.09	242.386	4.137002e+000	4.123084e+000	80	58	1.043755e+001	0	0	0	0	0	0	-0.0463621	0	0	57.259	60.3438
DATA	683	9	3	66	1	DarkCorner	DarkCorner	9938.5	242.352	4.119597e+000	4.105738e+000	75	58	1.164922e+001	0	0	0	0	0	0	-7.46835	0	0	57.5363	57.5385
DATA	684	9	4	66	1	DarkCorner	DarkCorner	9963.36	242.642	4.103255e+000	4.089451e+000	70	56	8.331991e+000	0	0	0	0	0	0	-8.6004	0	0	41.4593	54.7727
DATA	685	9	5	66	1	DarkCorner	DarkCorner	9989.18	243.367	4.086940e+000	4.073191e+000	72	54	8.895555e+000	0	0	0	0	0	0	-9.94045	0	0	39.4933	55.359
DATA	686	9	6	66	1	DarkCorner	DarkCorner	10014.1	242.551	4.072995e+000	4.059293e+000	73	55	1.179579e+001	0	0	0	0	0	0	-8.47563	0	0	39.4933	57.0465
DATA	687	9	7	66	1	DarkCorner	DarkCorner	10040	242.455	4.058973e+000	4.045319e+000	75	59	1.045846e+001	0	0	0	0	0	0	-8.91282	0	0	55.8519	58
DATA	688	9	8	0	0	A_44_P195306	NM_019377	10064.6	242.64	3.779844e+004	3.779846e+003	34555	57	8.642951e+000	0	0	0	0	0	0	35341.4	1	1	48.8603	57.4063
DATA	689	9	9	0	0	A_44_P653240	NM_001202552	10090.4	242.247	9.967126e+002	9.975233e+001	1017	54	9.710304e+000	0	0	0	0	0	0	934.697	1	1	48.5334	54.04
DATA	690	9	10	0	0	A_64_P012778	ENSRNOT00000038310	10116.6	242.432	1.662848e+001	4.340311e+000	96	54	1.203906e+001	0	0	0	0	0	0	15.6389	1	0	49.5074	55.2439
DATA	691	9	11	0	0	A_43_P11430	NM_001130503	10140.7	242.556	4.096703e+002	4.116177e+001	453.5	62	1.343967e+001	0	0	0	0	0	0	386.24	1	1	48.5334	60.7353
DATA	692	9	12	0	0	A_44_P225353	NM_001009678	10167	242.455	5.706620e+002	5.720549e+001	595	51	1.302015e+001	0	0	0	0	0	0	539.332	1	1	55.8519	55.7037
DATA	693	9	13	0	0	A_64_P055231	NM_001106620	10191.6	242.534	1.301707e+003	1.302316e+002	1316	56.5	1.652783e+001	0	0	0	0	0	0	1232.82	1	1	49.1849	56.4211
DATA	694	9	14	0	0	A_42_P540950	NM_001009541	10217.6	242.427	1.154128e+003	1.154811e+002	1186	55.5	1.155173e+001	0	0	0	0	0	0	1095.22	1	1	57.5363	57.1429
DATA	695	9	15	0	0	A_64_P135888	ENSRNOT00000029916	10243.4	242.427	7.336295e+000	4.033617e+000	86	63	1.287312e+001	0	0	0	0	0	0	6.97417	1	0	57.5363	63.975
DATA	696	9	16	0	0	A_64_P086448	NM_001008819	10268.6	242.427	1.362422e+002	1.418815e+001	212.5	56	1.136572e+001	0	0	0	0	0	0	129.714	1	1	57.5363	57.4444
DATA	697	9	17	0	0	A_42_P701779	NM_001108048	10293.2	242.338	1.643012e+003	1.643488e+002	1582.5	57	1.070188e+001	0	0	0	0	0	0	1566.29	1	1	48.8603	56.303
DATA	698	9	18	0	0	A_44_P409965	ENSRNOT00000036078	10319.4	242.427	2.174822e+001	4.509672e+000	99	55	1.186718e+001	0	0	0	0	0	0	20.7571	1	1	65	56.5172
DATA	699	9	19	0	0	A_44_P474037	NM_052807	10344.3	242.306	2.008651e+002	2.047065e+001	271	55.5	1.367204e+001	0	0	0	0	0	0	191.881	1	1	48.2044	58.7308
DATA	700	9	20	0	0	A_64_P156985	NM_001000385	10370.3	242.5	3.957367e+000	3.953136e+000	84.5	61.5	1.235739e+001	0	0	0	0	0	0	2.56028	0	0	65	61.25
DATA	701	9	21	0	0	A_42_P635228	NM_001107651	10395.5	242.5	3.266888e+001	5.119764e+000	114.5	62	1.149489e+001	0	0	0	0	0	0	31.248	1	1	57.5363	61.8485
DATA	702	9	22	0	0	A_64_P240508	ENSRNOT00000018000	10420.9	242.5	2.774726e+002	2.802570e+001	353	64	1.188958e+001	0	0	0	0	0	0	265.491	1	1	56.9804	65.5
DATA	703	9	23	0	0	A_64_P026509	NM_020656	10445.7	243.169	2.119468e+002	2.155774e+001	280	58.5	1.197526e+001	0	0	0	0	0	0	202.842	1	1	45.4864	60.8
DATA	704	9	24	0	0	A_42_P570241	NM_177928	10471.6	242.427	2.594914e+002	2.624663e+001	337	64	1.677102e+001	0	0	0	0	0	0	248.301	1	1	65	66.7273
DATA	706	9	26	0	0	A_64_P032893	TC597420	10521.6	242.406	3.014241e+004	3.014244e+003	28182.5	60	1.546870e+001	0	0	0	0	0	0	28822.9	1	1	47.5395	61.1143
DATA	707	9	27	0	0	A_64_P043605	NM_001024799	10547.3	242.413	4.970222e+003	4.970379e+002	4603	64.5	1.295917e+001	0	0	0	0	0	0	4749.67	1	1	48.8603	66.5
DATA	708	9	28	0	0	A_64_P095890	NM_019337	10572.7	242.373	1.367093e+004	1.367099e+003	12825.5	57	1.326331e+001	0	0	0	0	0	0	13053.6	1	1	51.0895	58.7632
DATA	709	9	29	0	0	A_42_P513145	NM_001107288	10597.7	242.9	8.212503e+002	8.222008e+001	839.5	49	7.831923e+000	0	0	0	0	0	0	783.472	1	1	47.2035	49.2439
DATA	710	9	30	0	0	A_64_P122317	NM_001108031	10624.1	242.5	2.781378e+002	2.809390e+001	337	49	8.513606e+000	0	0	0	0	0	0	265.004	1	1	56.9804	49.4074
DATA	711	9	31	0	0	A_64_P065492	NM_001109101	10649.5	242.5	1.119160e+002	1.187246e+001	173.5	51	1.082961e+001	0	0	0	0	0	0	106.488	1	1	65	50.3415
DATA	712	9	32	0	0	A_64_P129273	NM_001105871	10674.8	242.603	8.269194e+001	9.172239e+000	160	50	1.086843e+001	0	0	0	0	0	0	78.5639	1	1	50.4627	52.2286
DATA	713	9	33	0	0	A_64_P050748	NM_181824	10700.3	242.5	1.136385e+002	1.203917e+001	180	51	1.184692e+001	0	0	0	0	0	0	107.781	1	1	65	50.6571
DATA	714	9	34	0	0	A_42_P689755	NM_053306	10725.1	242.16	1.022564e+002	1.097393e+001	179	51	1.102729e+001	0	0	0	1	0	0	96.805	1	1	47.8731	50.2683
DATA	715	9	35	0	0	A_64_P039586	TC635481	10751.1	242.5	2.722602e+002	2.751696e+001	342	52	9.657968e+000	0	0	0	0	0	0	257.231	1	1	56.9804	51.7407
DATA	716	9	36	0	0	A_64_P083474	NM_001134731	10775.7	242.662	3.664867e+003	3.665086e+002	3506.5	50.5	1.386326e+001	0	0	0	0	0	0	3455.4	1	1	48.5334	54.1471
DATA	718	9	38	0	0	A_42_P763553	NM_001107486	10826.4	243.162	1.561978e+002	1.612827e+001	235	59.5	1.510890e+001	0	0	0	0	0	0	146.583	1	1	46.5243	63.7895
DATA	719	9	39	0	0	A_44_P151513	NM_001000901	10852.5	242.5	5.674960e+000	4.068946e+000	88	74	1.966495e+001	0	0	0	0	0	0	5.31071	1	0	65	77.8919
DATA	720	9	40	0	0	A_42_P460204	ENSRNOT00000020886	10877.3	242.8	5.479780e+002	5.494651e+001	573	155	5.458730e+001	0	0	0	0	1	0	511.46	1	1	46.8651	148.76
DATA	721	9	41	0	0	A_44_P218147	NM_001013432	10900.9	242.427	6.481434e+001	7.643221e+000	141.5	105	3.048705e+001	0	0	0	0	1	0	60.3288	1	1	50.7771	109.038
DATA	722	9	42	0	0	A_42_P554722	NM_001099758	10928	242.73	1.240819e+004	1.240825e+003	11257	73	2.687218e+001	0	0	0	0	0	0	11513.1	1	1	49.1849	79.871
DATA	723	9	43	0	0	A_44_P135450	XM_223143	10954.3	242.5	3.394605e+002	3.419002e+001	389	66	1.286075e+001	0	0	0	0	0	0	313.934	1	1	57.5363	63.4483
DATA	724	9	44	0	0	A_64_P107329	NM_001013207	10979	242.644	9.647203e+003	9.647290e+002	8909	89.5	6.944261e+001	0	0	0	0	1	0	8893.75	1	1	49.1849	123.694
DATA	725	9	45	0	0	A_64_P116219	NM_001004085	11004.3	242.778	1.677370e+004	1.677375e+003	14687	68	6.346166e+001	0	0	1	0	1	0	15412.2	1	1	47.8731	103.485
DATA	726	9	46	0	0	A_44_P147396	NM_001191744	11030.4	242.573	4.582528e+001	6.161336e+000	120	62.5	1.219662e+001	0	0	0	0	0	0	41.9533	1	1	57.5363	61.24
DATA	727	9	47	0	0	A_44_P975743	TC626448	11055.6	242.573	1.473478e+003	1.474057e+002	1349	66	1.446736e+001	0	0	0	0	0	0	1344.18	1	1	57.5363	69.2308
DATA	728	9	48	0	0	A_42_P728472	NM_001007600	11080.6	243.178	9.641240e+003	9.641329e+002	8550	59.5	2.253921e+001	0	0	0	0	0	0	8764.39	1	1	48.5334	68.3889
DATA	729	9	49	0	0	A_64_P130139	NM_013181	11105.7	242.778	1.234317e+004	1.234324e+003	10895	58	1.304356e+001	0	0	0	0	0	0	11177.8	1	1	47.5395	61.9565
DATA	730	9	50	0	0	A_42_P481087	XM_232226	11131.1	242.662	1.588364e+003	1.588914e+002	1472	58	1.132828e+001	0	0	0	0	0	0	1432.83	1	1	45.835	59.1628
DATA	731	9	51	0	0	A_44_P102465	NM_001000424	11157.4	242.573	5.373547e+001	6.818388e+000	131	55.5	1.500600e+001	0	0	0	0	0	0	48.2748	1	1	57.5363	58.1765
DATA	732	9	52	0	0	A_64_P082557	ENSRNOT00000029274	11182.6	242.573	1.762396e+001	4.567536e+000	98	57	8.930565e+000	0	0	0	0	0	0	15.77	1	0	57.5363	58.2963
DATA	733	9	53	0	0	A_64_P064873	XM_228599	11207.5	243.187	4.387515e+001	6.094661e+000	120	59.5	1.164818e+001	0	0	0	0	0	0	39.1078	1	1	48.8603	61.3235
DATA	734	9	54	0	0	A_64_P042298	A_64_P042298	11233	243.108	8.780183e+001	9.753795e+000	156.5	59	1.083922e+001	0	0	0	0	0	0	77.9349	1	1	46.1809	58.3636
DATA	735	9	55	0	0	A_44_P286341	ENSRNOT00000038519	11259	242.911	2.302398e+001	4.848030e+000	100	58	1.185561e+001	0	0	0	0	0	0	20.348	1	1	43.3362	57
DATA	736	9	56	0	0	A_44_P994614	NM_001106646	11283.5	243	4.522085e+004	4.522087e+003	38053	61	1.341733e+001	0	0	0	0	0	0	39802.4	1	1	48.5334	61.8966
DATA	737	9	57	0	0	A_64_P098354	XM_001066867	11309.6	242.573	1.485320e+002	1.546398e+001	213	61	1.647616e+001	0	0	0	0	0	0	130.149	1	1	57.5363	62.6216
DATA	738	9	58	0	0	A_64_P117373	NM_001107752	11335	242.545	1.178116e+002	1.254886e+001	190	70	1.709471e+001	0	0	0	0	0	0	102.785	1	1	55.8519	68.3333
DATA	739	9	59	0	0	A_64_P111395	ENSRNOT00000025391	11359.8	242.831	6.690985e+002	6.705045e+001	652	58	1.194590e+001	0	0	0	0	0	0	581.319	1	1	47.2035	58.0769
DATA	740	9	60	0	0	A_64_P059465	XM_229201	11385.4	242.745	1.247946e+001	4.534219e+000	90.5	68	9.239131e+000	0	0	0	0	0	0	10.7946	1	0	39.4933	66.1923
DATA	741	9	61	0	0	A_64_P010852	NM_001106214	11410.6	243.265	2.336287e+004	2.336291e+003	19421	64	1.093917e+001	0	0	0	0	0	0	20123.3	1	1	46.5243	64.7
DATA	742	9	62	0	0	A_64_P024967	NM_001008359	11436.6	242.573	6.714326e+001	8.026390e+000	143.5	55.5	1.227066e+001	0	0	0	0	0	0	57.5667	1	1	57.5363	57.3333
DATA	743	9	63	0	0	A_44_P278418	NM_012538	11462	242.545	2.437099e+001	5.044807e+000	103	58.5	1.128688e+001	0	0	0	0	0	0	20.8038	1	1	55.8519	59.1429
DATA	744	9	64	0	0	A_44_P821875	NM_001009500	11487.4	242.573	4.072832e+001	6.022361e+000	118	53	1.003079e+001	0	0	0	0	0	0	34.6163	1	1	57.5363	55.8286
DATA	745	9	65	0	0	A_64_P066737	A_64_P066737	11512.6	242.573	8.574353e+001	9.662802e+000	151	61	1.685543e+001	0	0	0	0	0	0	72.5646	1	1	57.5363	66.5185
DATA	746	9	66	0	0	A_64_P003943	TC616650	11538.4	242.573	7.320458e+001	8.579821e+000	146	57	9.194951e+000	0	0	0	0	0	0	61.6831	1	1	57.5363	56.7333
DATA	747	9	67	0	0	A_64_P047035	ENSRNOT00000066263	11563.5	242.648	1.552476e+001	4.754208e+000	94	56	1.132328e+001	0	0	0	0	0	0	13.0268	1	0	57.5363	58.9063
DATA	748	9	68	0	0	A_64_P113867	NM_001077201	11588.7	243.214	4.400307e+002	4.423377e+001	447	63	1.064753e+001	0	0	0	0	0	0	367.742	1	1	47.2035	60.2813
DATA	749	9	69	0	0	A_64_P013758	NM_012582	11614.5	242.648	9.637888e+001	1.064998e+001	160.5	62	1.099372e+001	0	0	0	0	0	0	80.1971	1	1	65	62.0938
DATA	750	9	70	0	0	A_44_P303982	NM_001106381	11639.5	243.214	1.511879e+002	1.578833e+001	205	59.5	1.540524e+001	0	0	0	0	0	0	125.316	1	1	47.2035	61.0313
DATA	751	9	71	0	0	A_64_P048601	A_64_P048601	11665.4	242.596	5.456253e+002	5.475342e+001	542	58	1.577319e+001	0	0	0	0	0	0	450.358	1	1	57.8122	61.1429
DATA	752	9	72	0	0	A_44_P304880	NM_001014261	11690.5	242.648	7.276898e+001	8.601330e+000	144	64	1.151115e+001	0	0	0	0	0	0	59.8324	1	1	57.5363	63.44
DATA	753	9	73	0	0	A_64_P096767	ENSRNOT00000039549	11715.9	242.614	8.432257e+000	4.679955e+000	89	58	1.103241e+001	0	0	0	0	0	0	6.90676	1	0	65	58.7742
DATA	754	9	74	0	0	A_43_P21810	NM_001025000	11740.3	243.071	3.039979e+001	5.529868e+000	102	68.5	1.717222e+001	0	0	0	0	0	0	24.8142	1	1	36.1258	71.7826
DATA	756	9	76	0	0	A_64_P084976	NM_001008916	11792.1	242.935	7.631770e+000	4.714943e+000	84	73	1.456572e+001	0	0	0	0	0	0	6.18471	1	0	54.4085	70.0313
DATA	757	9	77	0	0	A_64_P040004	XM_001054754	11816.9	243.137	3.258949e+003	3.259283e+002	2622	68	1.500070e+001	0	0	0	0	0	0	2632.58	1	1	46.8651	71.0811
DATA	758	9	78	0	0	A_64_P156785	XM_001058828	11842.6	242.931	4.698758e+000	4.683107e+000	84	61	1.813647e+001	0	0	0	0	0	0	0.307501	0	0	53.8203	66.8125
DATA	759	9	79	0	0	A_64_P123914	XM_217505	11867.9	243.433	2.024782e+004	2.024788e+003	16100	68.5	1.392984e+001	0	0	0	0	0	0	16255.9	1	1	45.835	67.5
DATA	760	9	80	66	1	DarkCorner	DarkCorner	11892.4	243.15	4.725685e+000	4.709788e+000	81.5	63	1.323817e+001	0	0	0	0	0	0	-0.955267	0	0	42.9674	65.5814
DATA	761	9	81	66	1	DarkCorner	DarkCorner	11919	243.447	4.738618e+000	4.722677e+000	79	61	1.355141e+001	0	0	0	0	0	0	-3.89403	0	0	50.1463	61.8627
DATA	762	9	82	66	1	DarkCorner	DarkCorner	11944.5	243	4.750902e+000	4.734920e+000	78	61	1.206866e+001	0	0	0	0	0	0	-3.98784	0	0	54.1152	62.561
DATA	763	9	83	66	1	DarkCorner	DarkCorner	11969.2	244.06	4.760262e+000	4.744249e+000	79	63.5	1.140066e+001	0	0	0	0	0	0	-2.81618	0	0	39.0882	63.6905
DATA	764	9	84	66	1	DarkCorner	DarkCorner	11995.2	243.049	4.771481e+000	4.755430e+000	81	66.5	1.148718e+001	0	0	0	0	0	0	-0.853421	0	0	49.1849	65.8684
DATA	765	9	85	66	1	DarkCorner	DarkCorner	12020.5	243	4.780286e+000	4.764204e+000	81	56	1.132211e+001	0	0	0	0	0	0	-0.719413	0	0	54.1152	55.9024
DATA	766	10	1	66	1	DarkCorner	DarkCorner	9900.5	249.5	4.141463e+000	4.128261e+000	85	63.5	1.371286e+001	0	0	0	0	0	0	0.709298	0	0	57.5363	62.9565
DATA	767	10	2	66	1	DarkCorner	DarkCorner	9924.91	249.654	4.124223e+000	4.110349e+000	77	58	9.704889e+000	0	0	0	0	0	0	-5.54612	0	0	50.1463	57.1429
DATA	768	10	3	66	1	DarkCorner	DarkCorner	9951.33	249.5	4.106714e+000	4.092899e+000	79	54	1.213763e+001	0	0	0	0	0	0	-0.730875	0	0	57.5363	56.3171
DATA	769	10	4	66	1	DarkCorner	DarkCorner	9976.5	249.5	4.090854e+000	4.077092e+000	72	54	8.271051e+000	0	0	0	0	0	0	-6.67432	0	0	57.5363	55.0938
DATA	770	10	5	66	1	DarkCorner	DarkCorner	10002	250.415	4.075105e+000	4.061396e+000	77	54	1.127711e+001	0	0	0	0	0	0	-3.74968	0	0	41.8414	56.3429
DATA	771	10	6	66	1	DarkCorner	DarkCorner	10027.4	249.573	4.061409e+000	4.047746e+000	71.5	54.5	1.004928e+001	0	0	0	0	0	0	-8.38748	0	0	57.5363	57.1071
DATA	772	10	7	0	0	A_64_P139937	XM_001070013	10052.6	249.573	1.593041e+001	4.337692e+000	96	55	1.201000e+001	0	0	0	0	0	0	14.888	1	0	57.5363	56.36
DATA	773	10	8	0	0	A_44_P185613	XM_001080030	10078.3	249.5	1.264853e+002	1.327260e+001	200	57	9.842729e+000	0	0	0	0	0	0	118.577	1	1	57.5363	57.5
DATA	774	10	9	0	0	A_42_P738520	NM_001007746	10102.6	250.106	1.636361e+003	1.636853e+002	1543	54.5	1.132188e+001	0	0	0	0	0	0	1538.41	1	1	45.4864	55.2333
DATA	775	10	10	66	-1	(-)3xSLv1	NegativeControl	10128.9	249.5	4.013398e+000	3.999897e+000	71	57	1.346981e+001	0	0	0	0	0	0	-11.3612	0	0	65	59
DATA	776	10	11	0	0	A_42_P626023	NM_001107265	10154.4	249.573	7.936369e+002	7.946393e+001	796	58	1.399785e+001	0	0	0	0	0	0	749.995	1	1	57.5363	60.1613
DATA	777	10	12	0	0	A_43_P11120	XR_085824	10179	250.226	3.041343e+003	3.041603e+002	2910	59	1.822564e+001	0	0	0	0	0	0	2880.66	1	1	45.4864	59.5769
DATA	778	10	13	0	0	A_42_P473425	NM_138844	10205.1	249.5	1.125563e+002	1.193621e+001	186.5	55	9.559497e+000	0	0	0	0	0	0	106.824	1	1	56.9804	53.475
DATA	779	10	14	0	0	A_44_P692981	ENSRNOT00000007422	10230.2	250.554	8.053955e+001	8.977080e+000	153.5	57	9.350818e+000	0	0	0	0	0	0	76.5886	1	1	44.0646	57.3659
DATA	780	10	15	0	0	A_64_P102366	A_64_P102366	10255.6	249.573	2.732733e+001	4.810672e+000	103	60	9.300538e+000	0	0	0	0	0	0	26.0257	1	1	57.5363	59
DATA	781	10	16	0	0	A_42_P616287	NM_001134555	10281.4	249.573	2.906045e+002	2.932812e+001	363.5	57	9.187195e+000	0	0	0	0	0	0	277.167	1	1	57.5363	54.4074
DATA	782	10	17	0	0	A_64_P073995	XM_001081370	10306	249.492	2.045946e+001	4.447240e+000	101	56.5	1.209102e+001	0	0	0	0	0	0	19.5366	1	1	44.4243	58.619
DATA	783	10	18	0	0	A_42_P595381	NM_001107258	10332	249.545	3.157523e+003	3.157770e+002	2997	55	7.880156e+000	0	0	0	0	0	0	3018.3	1	1	55.8519	55.5926
DATA	784	10	19	0	0	A_42_P462205	NM_001007745	10356.5	250.257	6.605591e+003	6.605708e+002	6115.5	58.5	1.248767e+001	0	0	0	0	0	0	6320.09	1	1	47.2035	59.7619
DATA	785	10	20	0	0	A_64_P016102	A_64_P016102	10382.6	249.573	1.727125e+001	4.300763e+000	100.5	59	1.110817e+001	0	0	0	0	0	0	16.5338	1	0	65	59.4839
DATA	786	10	21	0	0	A_64_P017829	NM_001128216	10408.4	249.573	3.950287e+000	3.936998e+000	80	61.5	1.216835e+001	0	0	0	0	0	0	-1.51382	0	0	57.5363	63.8529
DATA	787	10	22	0	0	A_64_P090244	NM_001127449	10433.6	249.573	1.476660e+005	1.476660e+004	141675	66	1.114549e+001	0	0	0	0	0	0	141456	1	1	57.5363	66.1143
DATA	788	10	23	0	0	A_42_P503626	NM_001044247	10459	249.545	5.373242e+001	6.660574e+000	134.5	60	1.670184e+001	0	0	0	0	0	0	51.4748	1	1	55.8519	65.125
DATA	789	10	24	0	0	A_64_P144850	ENSRNOT00000002335	10483.7	250.149	5.363259e+001	6.652638e+000	132	62	1.078164e+001	0	0	0	0	0	0	51.3767	1	1	45.835	60.6207
DATA	790	10	25	0	0	A_42_P703023	NM_145776	10509.6	249.573	4.940972e+002	4.956639e+001	559	60	1.437131e+001	0	0	0	0	0	0	473.11	1	1	57.5363	58.9655
DATA	791	10	26	0	0	A_64_P153581	NM_001109367	10535.4	249.573	6.310139e+001	7.439145e+000	143	62	1.724038e+001	0	0	0	0	0	0	60.3888	1	1	65	64.6667
DATA	792	10	27	0	0	A_44_P156782	NM_001013879	10559.9	250.063	1.290972e+003	1.291574e+002	1320	58	1.404039e+001	0	0	0	0	0	0	1234.73	1	1	45.835	60.8056
DATA	793	10	28	0	0	A_43_P12841	NM_053535	10585.9	249.614	3.267335e+002	3.291079e+001	395	53	1.266154e+001	0	0	0	0	0	0	312.192	1	1	57.259	54.4412
DATA	794	10	29	0	0	A_64_P097715	NM_001135710	10611.5	249.648	1.301419e+002	1.360055e+001	204	49	7.290800e+000	0	0	0	0	0	0	124.216	1	1	57.5363	49.0789
DATA	795	10	30	0	0	A_42_P769597	NM_001106230	10636.2	250.406	8.683371e+002	8.692372e+001	889	46.5	9.156145e+000	0	0	0	1	1	0	827.898	1	1	46.5243	48.0526
DATA	796	10	31	0	0	A_42_P561835	ENSRNOT00000043937	10661.2	250.352	2.701919e+002	2.730789e+001	340	51	8.739388e+000	0	0	0	0	0	0	257.248	1	1	46.8651	50.4242
DATA	797	10	32	0	0	A_42_P604399	NM_012941	10686.8	250.359	1.424435e+004	1.424440e+003	13344	51	1.288305e+001	0	0	0	0	0	0	13540.4	1	1	44.7812	53.641
DATA	798	10	33	0	0	A_42_P744495	NM_017125	10712	249.939	3.338139e+003	3.338376e+002	3238	54	8.080974e+000	0	0	0	0	0	0	3167.44	1	1	46.8651	52.9706
DATA	799	10	34	0	0	A_64_P047391	A_64_P047391	10738.5	249.648	5.344060e+002	5.358875e+001	604.5	52	1.157980e+001	0	0	0	0	0	0	506.039	1	1	57.5363	51.5526
DATA	800	10	35	0	0	A_44_P856007	NM_001108489	10763.5	250	1.762896e+002	1.807482e+001	248.5	51	1.151516e+001	0	0	0	0	0	0	166.601	1	1	54.1152	52.3529
DATA	801	10	36	0	0	A_64_P057562	ENSRNOT00000031129	10789.1	249.935	5.296613e+002	5.311687e+001	590	55	1.404126e+001	0	0	0	0	0	0	499.423	1	1	54.4085	54.9032
DATA	802	10	37	0	0	A_64_P102395	ENSRNOT00000029656	10814	250.203	1.629137e+002	1.677715e+001	233	58	1.543915e+001	0	0	0	0	0	0	153.262	1	1	46.8651	61.2353
DATA	803	10	38	0	0	A_64_P132318	NM_133296	10839	250.151	1.749795e+003	1.750256e+002	1705.5	70	1.261298e+001	0	0	0	0	0	0	1642.03	1	1	46.8651	66.0588
DATA	805	10	40	0	0	A_64_P158848	NM_001130540	10889.9	250.2	1.692227e+003	1.692709e+002	1644	122	5.452225e+001	0	0	0	0	1	0	1579.34	1	1	46.8651	140.135
DATA	806	10	41	0	0	A_64_P302888	NM_001135015	10916	250	8.235692e+001	9.178714e+000	160	84	2.980005e+001	0	0	0	0	1	0	76.6286	1	1	65	91.2152
DATA	807	10	42	0	0	A_42_P604331	NM_001108533	10941.5	250	1.069104e+005	1.069104e+004	98615	72	1.460620e+001	0	0	0	0	0	0	99168.3	1	1	54.1152	70.2
DATA	808	10	43	0	0	A_64_P166406	NM_019152	10965.9	250	7.807358e+002	7.817998e+001	806.5	70.5	3.074542e+001	0	0	0	0	0	0	721.985	1	1	45.4864	78.8529
DATA	809	10	44	0	0	A_64_P123660	NM_001031655	10991.5	250	1.847619e+003	1.848072e+002	1678	140	9.044352e+001	0	0	1	0	1	0	1702.89	1	1	48.5334	155.971
DATA	810	10	45	0	0	A_42_P668800	NM_001127553	11016.9	250.2	1.499327e+003	1.499889e+002	1428	60.5	1.401850e+001	0	0	0	0	0	0	1377.22	1	1	46.8651	61.7174
DATA	811	10	46	0	0	A_64_P090458	NM_001109516	11043	250	1.079368e+001	4.258946e+000	94	62	9.812277e+000	0	0	0	0	0	0	9.87845	1	0	65	62.6757
DATA	812	10	47	0	0	A_42_P635396	NM_001109506	11067.7	250.403	2.627012e+003	2.627337e+002	2426	60	1.655688e+001	0	0	0	0	0	0	2395.99	1	1	47.5395	63.6111
DATA	813	10	48	0	0	A_64_P002989	NM_031604	11093.5	250	9.364431e+004	9.364432e+003	83994	59.5	1.480088e+001	0	0	0	0	0	0	85080	1	1	54.1152	63.8846
DATA	814	10	49	0	0	A_44_P914346	DV717012	11118.6	250.027	1.977129e+003	1.977568e+002	1827	59	1.191307e+001	0	0	0	0	0	0	1789.58	1	1	48.5334	61.7241
DATA	815	10	50	0	0	A_44_P791176	NM_001130577	11143.9	250.113	3.044494e+001	5.172687e+000	109	57	1.322012e+001	0	0	0	0	0	0	27.4507	1	1	46.8651	57.6579
DATA	816	10	51	0	0	A_64_P011894	NM_001004210	11169.5	250.056	2.518722e+004	2.518726e+003	22292.5	59	1.140964e+001	0	0	0	0	0	0	22619	1	1	48.5334	60.4138
DATA	817	10	52	0	0	A_42_P717654	XM_001063683	11194.5	250.056	4.373777e+003	4.373980e+002	3937.5	57	8.001449e+000	0	0	0	0	0	0	3912.22	1	1	48.5334	57.9063
DATA	818	10	53	0	0	A_64_P006102	NM_001100784	11219.9	250.205	3.563948e+002	3.588993e+001	400	58	1.105351e+001	0	0	0	0	0	0	317.491	1	1	47.5395	59.3611
DATA	819	10	54	0	0	A_64_P116038	NM_001000335	11245.4	250.224	2.631244e+001	4.998837e+000	98.5	58	1.162935e+001	0	0	0	0	0	0	23.3426	1	1	42.9674	58.3784
DATA	820	10	55	0	0	A_42_P581567	NM_001011899	11271.5	250	1.853273e+002	1.901805e+001	245	61	1.429180e+001	0	0	0	0	0	0	163.691	1	1	65	61.4545
DATA	821	10	56	0	0	A_42_P671206	FQ231880	11296.1	250.364	1.610343e+003	1.610913e+002	1446.5	55	1.370410e+001	0	0	0	0	0	0	1416.6	1	1	45.835	58.5625
DATA	823	10	58	0	0	A_64_P078205	NM_001044255	11346.9	250.2	6.145960e+003	6.146112e+002	5252.5	59.5	1.304633e+001	0	0	0	0	0	0	5359.97	1	1	46.8651	60.5238
DATA	824	10	59	66	-1	(-)3xSLv1	NegativeControl	11373.1	250.462	4.357262e+000	4.342604e+000	77	60	1.095946e+001	0	0	0	0	0	0	-4.48241	0	0	52.0157	58.7879
DATA	825	10	60	0	0	A_44_P259051	NM_001037658	11398.5	250.352	5.728347e+002	5.744929e+001	582	65	9.156601e+000	0	0	0	0	0	0	495.203	1	1	57.5363	65.48
DATA	826	10	61	0	0	A_64_P325262	A_64_P325262	11423.5	250.429	2.429328e+001	5.008892e+000	101	60	1.417965e+001	0	0	0	0	0	0	20.9115	1	1	49.8279	61.7059
DATA	827	10	62	0	0	A_64_P140005	NM_001191804	11448.6	250.425	2.461224e+001	5.040921e+000	103	55	1.153490e+001	0	0	0	0	0	0	21.095	1	1	50.7771	55.5556
DATA	828	10	63	0	0	A_42_P588606	NM_001134544	11474.1	250.507	2.260344e+002	2.303123e+001	272	55	1.048798e+001	0	0	0	0	0	0	192.894	1	1	48.5334	56.9535
DATA	829	10	64	0	0	A_42_P788541	NM_001106794	11499.4	250.392	6.581120e+003	6.581270e+002	5723.5	60.5	8.054908e+000	0	0	0	0	0	0	5591.85	1	1	49.1849	59.1923
DATA	830	10	65	0	0	A_44_P1050200	NM_001108000	11524.7	250.382	1.314969e+003	1.315724e+002	1196	57	1.451131e+001	0	0	0	0	0	0	1112.54	1	1	46.5243	60.2432
DATA	831	10	66	0	0	A_42_P777935	ENSRNOT00000027369	11550.1	250.54	3.225507e+002	3.256409e+001	354	60	1.196159e+001	0	0	0	0	0	0	271.745	1	1	44.0646	59.7273
DATA	832	10	67	0	0	A_44_P349475	NM_031333	11575.9	250.575	9.454113e+002	9.464791e+001	839	56	1.091832e+001	0	0	0	0	0	0	793.092	1	1	48.2044	57.625
DATA	833	10	68	0	0	A_64_P136188	XM_001059617	11601	250.448	1.877686e+002	1.931168e+001	242	62	1.230023e+001	0	0	0	0	0	0	156.865	1	1	45.835	61.6154
DATA	834	10	69	0	0	A_64_P023386	NM_001106232	11626.2	250.418	4.866899e+004	4.866901e+003	39698	60.5	1.304548e+001	0	0	0	0	0	0	40493.3	1	1	53.2255	62.7692
DATA	835	10	70	0	0	A_64_P048576	NM_001000163	11651.7	250.708	6.841430e+001	8.216251e+000	137	61.5	1.662518e+001	0	0	0	0	0	0	56.6958	1	1	48.2044	65.5
DATA	836	10	71	1028	1	(+)E1A_r60_a20	E1A_r60_a20	11677.6	250.644	4.060196e+001	6.111867e+000	113.5	65.5	1.500948e+001	0	0	0	0	0	0	33.5116	1	1	48.2044	65.6071
DATA	837	10	72	0	0	A_64_P078510	XM_001053102	11703.1	250.662	4.540086e+002	4.563190e+001	470	65	1.520022e+001	0	0	0	0	0	0	373.279	1	1	45.4864	67.1892
DATA	838	10	73	0	0	A_64_P101533	A_64_P101533	11727.9	249.707	9.161977e+000	4.694125e+000	87	64	1.212031e+001	0	0	0	0	0	0	7.50368	1	0	36.1258	63.2632
DATA	839	10	74	0	0	A_64_P164601	ENSRNOT00000050537	11753.6	250.778	8.381533e+001	9.570375e+000	148	77	1.406432e+001	0	0	0	0	0	0	68.4088	1	1	47.8731	76.8
DATA	840	10	75	0	0	A_42_P694928	NM_001109046	11778.7	250.662	2.621368e+002	2.662047e+001	290	78	1.559040e+001	0	0	0	0	0	0	213.203	1	1	48.5334	74.1875
DATA	841	10	76	0	0	A_42_P510565	ENSRNOT00000046259	11803.8	250.533	2.135015e+003	2.135522e+002	1756	74.5	1.593464e+001	0	0	0	0	0	0	1730.59	1	1	49.5074	72.4667
DATA	842	10	77	0	0	A_64_P050877	XM_001081816	11830.4	251.092	1.948788e+001	5.057515e+000	97.5	64	1.515966e+001	0	0	0	0	0	0	15.7447	1	0	49.1849	65.3793
DATA	843	10	78	0	0	A_44_P281352	NM_001013076	11855.6	250.427	3.007073e+002	3.043305e+001	323	61	1.229284e+001	0	0	0	0	0	0	242.166	1	1	57.5363	61.7
DATA	844	10	79	0	0	A_44_P269675	ENSRNOT00000031839	11880.6	250.566	3.771700e+002	3.800815e+001	387.5	69	1.235905e+001	0	0	0	0	0	0	302.874	1	1	49.8279	69.0606
DATA	845	10	80	66	1	DarkCorner	DarkCorner	11906.4	250.427	4.724723e+000	4.708829e+000	80	63	1.364395e+001	0	0	0	0	0	0	-3.46067	0	0	57.5363	63.5581
DATA	846	10	81	66	1	DarkCorner	DarkCorner	11932.2	250.649	4.736871e+000	4.720936e+000	79	61	1.118425e+001	0	0	0	0	0	0	-2.60811	0	0	41.8414	62.88
DATA	847	10	82	66	1	DarkCorner	DarkCorner	11957.3	250.5	4.748187e+000	4.732213e+000	79	60.5	1.168569e+001	0	0	0	0	0	0	-3.20282	0	0	57.5363	62.3438
DATA	848	10	83	66	1	DarkCorner	DarkCorner	11982.1	250.827	4.757934e+000	4.741928e+000	75	62	1.173660e+001	0	0	0	0	0	0	-4.02383	0	0	54.4085	62.7955
DATA	849	10	84	66	1	DarkCorner	DarkCorner	12007.8	250.397	4.767834e+000	4.751795e+000	78.5	65	1.359152e+001	0	0	0	0	0	0	-2.99166	0	0	42.9674	64.963
DATA	850	10	85	66	1	DarkCorner	DarkCorner	12032.7	250.455	4.775869e+000	4.768336e+000	84	50	1.004381e+001	0	0	0	0	0	0	2.25878	0	0	52.6241	49.6512
DATA	851	11	1	66	1	DarkCorner	DarkCorner	9887.5	256.648	4.146392e+000	4.132443e+000	78	54	1.278204e+001	0	0	0	0	0	0	-1.93712	0	0	57.5363	56.0617
DATA	852	11	2	66	1	DarkCorner	DarkCorner	9913.09	256.614	4.128053e+000	4.114166e+000	70.5	58.5	9.065313e+000	0	0	0	0	0	0	-8.66849	0	0	57.259	59.4286
DATA	853	11	3	66	1	DarkCorner	DarkCorner	9937.7	257.46	4.110737e+000	4.096908e+000	73.5	56	1.230826e+001	0	0	0	0	0	0	-7.23888	0	0	40.2912	57.0816
DATA	854	11	4	66	1	DarkCorner	DarkCorner	9963.61	256.931	4.094305e+000	4.080532e+000	72	52	1.029192e+001	0	0	0	0	0	0	-9.17625	0	0	53.8203	55.069
DATA	855	11	5	66	1	DarkCorner	DarkCorner	9989.5	257	4.078445e+000	4.064725e+000	67.5	57	1.073023e+001	0	0	0	0	0	0	-12.4277	0	0	54.1152	57.069
DATA	856	11	6	66	1	DarkCorner	DarkCorner	10013.9	256.903	4.064433e+000	4.050760e+000	73	54	1.325784e+001	0	0	0	0	0	0	-7.70057	0	0	46.8651	57.2973
DATA	857	11	7	0	0	A_64_P077381	A_64_P077381	10039.4	257.271	2.099016e+001	4.549877e+000	98	54	1.251679e+001	0	0	0	0	0	0	19.6059	1	1	47.2035	52.7931
DATA	858	11	8	0	0	A_64_P085926	NM_030860	10064.8	257.194	1.317556e+003	1.318170e+002	1275	55	9.896082e+000	0	0	0	0	0	0	1234.58	1	1	47.5395	56.8919
DATA	859	11	9	0	0	A_42_P598560	NM_001033693	10090.5	256.933	1.512459e+003	1.512991e+002	1550.5	58	9.794079e+000	0	0	0	0	0	0	1421.44	1	1	48.8603	56.5789
DATA	860	11	10	0	1	ETG08_142674	ETG08_142674	10115.3	256.908	4.014666e+000	4.001160e+000	80	56.5	1.244060e+001	0	0	0	0	0	0	-0.560984	0	0	49.1849	57.725
DATA	861	11	11	0	0	A_42_P724142	NM_001106340	10141.1	257.104	1.595985e+003	1.596484e+002	1573	58	1.254103e+001	0	0	0	0	0	0	1507.98	1	1	46.8651	58.5789
DATA	862	11	12	0	0	A_64_P054193	NM_001014193	10166.3	257.143	3.510132e+004	3.510134e+003	32906	61.5	1.302991e+001	0	0	0	0	0	0	33243.9	1	1	47.2035	62.4615
DATA	863	11	13	0	0	A_42_P750554	NM_001107846	10191.7	257.25	1.523363e+003	1.523881e+002	1478.5	55.5	1.516672e+001	0	0	0	0	0	0	1445.89	1	1	47.5395	55.0294
DATA	864	11	14	0	0	A_44_P285547	NM_053393	10216.9	257.319	1.204693e+002	1.268260e+001	201	55	1.104970e+001	0	0	0	0	0	0	114.567	1	1	46.1809	55.0313
DATA	865	11	15	0	0	A_42_P623374	NM_138845	10242.4	257.451	1.728924e+003	1.729377e+002	1693.5	58.5	9.504210e+000	0	0	0	0	0	0	1647.13	1	1	47.2035	57.3158
DATA	866	11	16	0	0	A_64_P064888	NM_001127303	10268	257.344	1.857806e+002	1.899369e+001	256	60	8.768835e+000	0	0	0	0	0	0	177.265	1	1	45.4864	59.3226
DATA	867	11	17	0	0	A_44_P522406	NM_001001103	10293.1	256.925	3.034770e+001	4.978576e+000	111	58	9.928227e+000	0	0	0	0	0	0	28.9933	1	1	46.5243	57.6053
DATA	868	11	18	0	0	A_42_P660129	NM_130422	10319.5	257	9.192617e+001	1.000217e+001	168	57.5	1.214709e+001	0	0	0	0	0	0	87.9284	1	1	54.1152	59.2174
DATA	869	11	19	0	0	A_64_P035679	A_64_P035679	10344.5	257	5.294011e+004	5.294012e+003	49464	57	1.131232e+001	0	0	0	0	0	0	50684.5	1	1	54.1152	58.7407
DATA	870	11	20	0	0	A_64_P118862	NM_001191999	10370.4	257.069	8.205180e+001	9.100117e+000	160.5	58	1.270630e+001	0	0	0	0	0	0	78.6155	1	1	53.8203	58.25
DATA	871	11	21	0	0	A_42_P638181	NM_133395	10394.8	257.194	8.276455e+003	8.276548e+002	7615	60.5	9.798283e+000	0	0	0	0	0	0	7934.1	1	1	47.5395	60.2222
DATA	872	11	22	0	0	A_44_P423803	NM_031144	10420.3	257.257	1.954214e+004	1.954218e+003	18390.5	69	9.648444e+000	0	0	0	0	0	0	18740.5	1	1	47.2035	67.6774
DATA	874	11	24	0	0	A_44_P445195	NM_133300	10470.9	257.294	1.994941e+003	1.995328e+002	1962.5	62.5	1.229789e+001	0	0	0	0	0	0	1913.33	1	1	45.835	63.8571
DATA	875	11	25	0	0	A_42_P563276	NM_013093	10496.6	257.159	1.559091e+002	1.607918e+001	232	61	1.293017e+001	0	0	0	0	0	0	149.493	1	1	46.8651	59.4242
DATA	876	11	26	0	0	A_42_P535608	NM_001107160	10522.3	257.232	1.018502e+002	1.091838e+001	184	63.5	1.298814e+001	0	0	0	0	0	0	97.6185	1	1	41.8414	63.3929
DATA	877	11	27	0	0	A_44_P233080	ENSRNOT00000026303	10547.5	257.188	5.508536e+003	5.508677e+002	5206	61.5	1.183216e+001	0	0	0	0	0	0	5276.46	1	1	49.8279	62
DATA	878	11	28	0	0	A_43_P13320	NM_138880	10573.4	257.427	2.812428e+001	4.840335e+000	102	58.5	1.233183e+001	0	0	0	1	0	0	26.9187	1	1	57.5363	60.8636
DATA	879	11	29	0	0	A_42_P548007	NM_001135020	10598.1	257.605	9.898998e+003	9.899077e+002	9760	51	7.431431e+000	0	0	0	0	0	0	9466.02	1	1	49.1849	50.2632
DATA	880	11	30	0	0	A_44_P282853	NM_031983	10623.3	257.483	2.952651e+003	2.952915e+002	2882	49	7.415038e+000	0	0	0	0	0	0	2820.24	1	1	52.3208	49.129
DATA	881	11	31	0	0	A_42_P552341	NM_053519	10648.9	257.519	6.767945e+002	6.779478e+001	729	50.5	1.013385e+001	0	0	0	0	0	0	645.589	1	1	49.5074	49.85
DATA	882	11	32	0	0	A_64_P031476	NM_001107172	10674.5	257.254	1.393934e+002	1.449062e+001	218	52	1.252007e+001	0	0	0	0	0	0	132.761	1	1	46.5243	56.4324
DATA	883	11	33	0	0	A_42_P620762	NM_024403	10699.6	257.444	1.647509e+004	1.647513e+003	15568	56	8.689870e+000	0	0	0	0	0	0	15666	1	1	48.2044	55.0769
DATA	884	11	34	0	0	A_64_P135370	A_64_P135370	10724.9	257.389	5.010497e+002	5.026220e+001	561.5	55	9.156606e+000	0	0	0	0	0	0	475.575	1	1	48.2044	54.4444
DATA	885	11	35	0	0	A_42_P576202	NM_001108583	10750.4	257.684	1.205835e+003	1.206492e+002	1149	48	1.304970e+001	0	0	0	0	0	0	1142.32	1	1	49.1849	50.1935
DATA	886	11	36	0	0	A_64_P022879	NM_001109019	10776.5	257.352	3.528127e+001	5.325555e+000	116	54	1.143902e+001	0	0	0	0	0	0	33.3474	1	1	57.5363	53.2683
DATA	887	11	37	0	0	A_42_P711589	NM_022948	10800.9	257.533	7.304808e+003	7.304918e+002	6787.5	56	1.174289e+001	0	0	0	0	0	0	6889.42	1	1	48.8603	55.3667
DATA	888	11	38	0	0	A_64_P007244	A_64_P007244	10826.9	257.722	8.043003e+003	8.043103e+002	7707	57.5	1.336271e+001	0	0	0	0	0	0	7567.04	1	1	47.8731	59.3
DATA	889	11	39	0	0	A_42_P477625	NM_001108719	10851.6	257.64	5.517274e+003	5.517421e+002	5012.5	70	1.154476e+001	0	0	0	0	0	0	5177.65	1	1	48.8603	67.275
DATA	890	11	40	0	0	A_64_P153091	XM_341223	10877.6	257.473	1.143456e+003	1.144166e+002	1133	95	4.368215e+001	0	0	0	0	1	0	1070.06	1	1	49.1849	105.389
DATA	891	11	41	0	0	A_64_P016347	NM_130819	10903.4	257.427	4.054608e+000	4.059123e+000	85	95	3.321068e+001	0	0	0	0	1	0	3.57817	0	0	57.5363	101.131
DATA	892	11	42	0	0	A_42_P495598	NM_001014026	10928.6	257.427	5.764365e+000	4.093745e+000	85	71.5	1.337312e+001	0	0	0	0	0	0	5.36272	1	0	57.5363	71.9074
DATA	893	11	43	0	0	A_42_P759043	NM_001134509	10953.4	257.703	7.157735e+002	7.169269e+001	722	67	1.483464e+001	0	0	0	0	0	0	663.915	1	1	48.5334	65.069
DATA	894	11	44	0	0	A_64_P071595	XM_002728361	10979.5	257.352	2.086988e+001	4.581803e+000	100	88	9.234495e+001	0	0	1	0	1	0	19.2923	1	1	57.5363	136.098
DATA	895	11	45	0	0	A_42_P780882	NM_001008511	11004.4	257.556	7.632790e+003	7.632900e+002	6870.5	83.5	5.152497e+001	0	0	0	0	1	0	7032.97	1	1	48.2044	102.375
DATA	896	11	46	0	0	A_64_P044420	NM_001134983	11029.9	258.388	1.079110e+002	1.154576e+001	184	64	1.137849e+001	0	0	0	0	0	0	99.102	1	1	50.4627	64.4054
DATA	897	11	47	0	0	A_64_P000596	NM_001025732	11055.2	257.632	5.129442e+003	5.129607e+002	4649	58	1.526681e+001	0	0	0	0	0	0	4693.35	1	1	49.5074	60.4286
DATA	898	11	48	0	0	A_44_P468873	ENSRNOT00000015693	11081.1	257.5	2.892592e+001	5.047496e+000	108	55	1.643303e+001	0	0	0	0	0	0	26.3673	1	1	56.9804	59.4615
DATA	900	11	50	0	0	A_42_P727022	NM_001107076	11131.3	257.443	1.027369e+004	1.027377e+003	9214	61	1.279217e+001	0	0	0	0	0	0	9294.81	1	1	47.5395	61.1622
DATA	901	11	51	0	0	A_64_P135604	NM_001009641	11156.7	257.384	3.455028e+003	3.455282e+002	3190.5	64	1.369546e+001	0	0	0	0	0	0	3113.57	1	1	48.5334	62.9677
DATA	902	11	52	0	0	A_42_P813939	NM_001108741	11181.9	257.771	2.969795e+003	2.970092e+002	2692.5	57.5	7.695722e+000	0	0	0	0	0	0	2665.95	1	1	46.5243	59.5
DATA	903	11	53	0	0	A_64_P052494	A_64_P052494	11208.1	257.477	1.361719e+001	4.432522e+000	92	59	1.111377e+001	0	0	0	0	0	0	12.1722	1	0	55.8519	59.8857
DATA	904	11	54	0	0	A_44_P323678	NM_001107651	11233.5	257.5	1.913612e+001	4.647824e+000	98	57	1.131831e+001	0	0	0	0	0	0	17.0351	1	0	57.5363	57.6857
DATA	905	11	55	0	0	A_44_P435764	NM_001191810	11258.7	257.5	1.681532e+001	4.573507e+000	99.5	58	1.300348e+001	0	0	0	0	0	0	14.9073	1	0	65	58.7436
DATA	906	11	56	0	0	A_42_P688320	NM_001108569	11284.4	257.427	2.149531e+002	2.191561e+001	273.5	61	1.221351e+001	0	0	0	0	0	0	189.746	1	1	57.5363	59.6452
DATA	907	11	57	0	0	A_42_P798500	NM_001014023	11308.6	257.521	7.022795e+002	7.035878e+001	681.5	60	1.707802e+001	0	0	0	0	0	0	617.429	1	1	48.2044	62.7674
DATA	908	11	58	0	0	A_44_P279083	NM_133401	11335	257.455	5.805694e+002	5.821655e+001	577.5	59.5	1.403021e+001	0	0	0	0	0	0	508.141	1	1	55.8519	61.6944
DATA	909	11	59	0	0	A_64_P129850	NM_001002855	11360.5	257.5	1.778072e+001	4.677788e+000	92	62	1.265909e+001	0	0	0	0	0	0	15.4953	1	0	65	61.561
DATA	910	11	60	0	0	A_64_P029468	NM_001105784	11385.7	257.5	1.787193e+001	4.698488e+000	94	65	1.082121e+001	0	0	0	0	0	0	15.508	1	0	65	67.2069
DATA	911	11	61	0	0	A_43_P18571	NM_001013965	11410.8	257.855	6.075904e+002	6.091554e+001	609.5	63.5	1.535588e+001	0	0	0	0	0	0	525	1	1	48.5334	64.8929
DATA	912	11	62	0	1	ERCC-00104_60	ERCC-00104_60	11436.2	257.887	2.124593e+001	4.870492e+000	101	56	1.177414e+001	0	0	0	0	0	0	18.2786	1	0	46.8651	55.3415
DATA	913	11	63	0	0	A_44_P653701	NM_001106536	11461.3	257.697	1.754740e+002	1.809105e+001	227.5	58.5	1.267703e+001	0	0	0	0	0	0	150.314	1	1	45.1352	58.4167
DATA	914	11	64	0	0	A_64_P093593	NM_001107077	11487	258	4.417385e+002	4.439450e+001	453	58	1.028953e+001	0	0	0	0	0	0	376.768	1	1	46.8651	58.9756
DATA	915	11	65	0	0	A_44_P1034793	NM_001008300	11512.3	257.568	8.906797e+002	8.917857e+001	826	61.5	1.420280e+001	0	0	0	0	0	0	756.365	1	1	48.8603	63.6429
DATA	916	11	66	0	0	A_42_P768355	NM_057130	11537.4	257.87	1.446525e+003	1.447212e+002	1305	59.5	1.468949e+001	0	0	0	0	0	0	1223.3	1	1	46.8651	61.3438
DATA	917	11	67	0	0	A_44_P714581	NM_001107480	11562.5	257.704	5.479271e+003	5.479454e+002	4508.5	56	1.076004e+001	0	0	0	0	0	0	4614.13	1	1	47.8731	59.1818
DATA	918	11	68	0	0	A_64_P084521	NM_019351	11588.1	257.757	6.901657e+003	6.901803e+002	5698.5	62.5	1.175126e+001	0	0	0	0	0	0	5787.54	1	1	46.5243	60.7222
DATA	919	11	69	0	0	A_42_P562625	NM_131913	11614.5	257.5	2.110320e+003	2.110803e+002	1883	60	1.084398e+001	0	0	0	0	0	0	1761.99	1	1	57.5363	61.1667
DATA	920	11	70	0	0	A_42_P468662	NM_001108886	11638.8	257.74	1.635647e+003	1.636275e+002	1411.5	59	1.523336e+001	0	0	0	0	0	0	1360.45	1	1	48.5334	65.3478
DATA	921	11	71	0	0	A_42_P778587	NM_001135767	11664.6	257.843	3.713571e+002	3.741360e+001	379	61	1.472481e+001	0	0	0	0	0	0	307.636	1	1	47.5395	63.1515
DATA	922	11	72	0	0	A_64_P139957	NM_001008525	11690.1	258.044	2.255526e+004	2.255530e+003	18842	70	1.613796e+001	0	0	0	0	0	0	18612.7	1	1	46.8651	71.0857
DATA	923	11	73	0	0	A_44_P318402	NM_001000187	11715.9	257.5	9.669432e+001	1.070246e+001	160.5	62	1.275438e+001	0	0	0	0	0	0	79.4756	1	1	56.9804	62.6429
DATA	924	11	74	0	0	A_64_P090359	NM_001033565	11741.6	257.676	2.086468e+001	5.055121e+000	95.5	64	1.292657e+001	0	0	0	0	0	0	17.086	1	0	48.2044	65.8704
DATA	925	11	75	0	0	A_43_P17778	NM_001134991	11766.6	258.338	2.472539e+001	5.240037e+000	102	78	9.545520e+000	0	0	0	0	0	0	20.1793	1	1	46.8651	77.3158
DATA	926	11	76	0	0	A_64_P093176	A_64_P093176	11792.1	257.5	5.495537e+001	7.190446e+000	128	74	1.833685e+001	0	0	0	0	0	0	44.687	1	1	56.9804	73.9667
DATA	927	11	77	0	0	A_64_P100123	NM_182821	11816.7	258	5.353175e+003	5.353377e+002	4198	68	1.587118e+001	0	0	0	0	0	0	4339.48	1	1	46.5243	70.8611
DATA	928	11	78	0	0	A_44_P426660	NM_001135717	11842.2	257.635	1.327790e+001	4.851854e+000	90	59	8.656280e+000	0	0	0	0	0	0	10.7283	1	0	52.0157	57.7419
DATA	929	11	79	0	0	A_42_P696084	NM_031022	11867.4	258.028	3.851983e+003	3.852268e+002	3124	67	1.210723e+001	0	0	0	1	0	0	3103.28	1	1	48.2044	65.6333
DATA	930	11	80	66	1	DarkCorner	DarkCorner	11893.6	258.259	4.709630e+000	4.693787e+000	76.5	63	1.266224e+001	0	0	0	0	0	0	-2.91551	0	0	65	66.0294
DATA	931	11	81	66	1	DarkCorner	DarkCorner	11917.7	257.432	4.722516e+000	4.706634e+000	80	63	1.196867e+001	0	0	0	0	0	0	0.0565445	0	0	38.6789	63.7959
DATA	932	11	82	66	1	DarkCorner	DarkCorner	11944.1	257.382	4.734843e+000	4.718915e+000	75	59	8.586387e+000	0	0	0	0	0	0	-4.45264	0	0	46.5243	60.4359
DATA	933	11	83	66	1	DarkCorner	DarkCorner	11969.2	258.075	4.744766e+000	4.728804e+000	79	60	1.062275e+001	0	0	0	0	0	0	-3.61328	0	0	41.0736	60.303
DATA	934	11	84	66	1	DarkCorner	DarkCorner	11995.4	257.573	4.755507e+000	4.739509e+000	79	65	1.065397e+001	0	0	0	0	0	0	-3.51933	0	0	57.5363	64.9167
DATA	935	11	85	66	1	DarkCorner	DarkCorner	12020.5	257.825	4.763923e+000	4.747897e+000	81	50	1.194641e+001	0	0	0	0	0	0	-0.521926	0	0	42.9674	51.6154
DATA	936	12	1	66	1	DarkCorner	DarkCorner	9900.07	263.804	4.132754e+000	4.118851e+000	79	63	8.731243e+000	0	0	0	0	0	0	-1.64747	0	0	42.2201	61.9048
DATA	937	12	2	66	1	DarkCorner	DarkCorner	9925.58	264.427	4.114567e+000	4.100725e+000	72	56	1.247736e+001	0	0	0	0	0	0	-4.97066	0	0	57.5363	56.1563
DATA	938	12	3	66	1	DarkCorner	DarkCorner	9951.42	264.427	4.097468e+000	4.083684e+000	73.5	53	1.205585e+001	0	0	0	0	0	0	-8.59442	0	0	57.5363	56.1842
DATA	939	12	4	66	1	DarkCorner	DarkCorner	9976.5	264.352	4.081797e+000	4.068066e+000	74	56	9.743905e+000	0	0	0	0	0	0	-5.67109	0	0	57.5363	58.2333
DATA	940	12	5	66	1	DarkCorner	DarkCorner	10001.3	265.122	4.066628e+000	4.052948e+000	78	53	1.267119e+001	0	0	0	0	0	0	-4.48299	0	0	40.2912	56.6774
DATA	941	12	6	0	0	A_64_P118227	XM_002728056	10027.4	264.427	7.247181e+000	4.103372e+000	88	52	1.200913e+001	0	0	0	0	0	0	6.76574	1	0	65	53.1724
DATA	942	12	7	0	0	A_64_P051317	NM_130425	10052.4	264.658	1.544779e+002	1.596372e+001	227	50.5	9.751161e+000	0	0	0	0	0	0	144.687	1	1	48.5334	51.2917
DATA	943	12	8	0	0	A_42_P756350	NM_021772	10078.1	264.5	8.329519e+001	9.245933e+000	161	58	8.622476e+000	0	0	0	0	0	0	78.2576	1	1	56.9804	57.3684
DATA	944	12	9	0	0	A_42_P816479	NM_022278	10102.7	264.5	1.331910e+004	1.331916e+003	12342	57.5	1.124634e+001	0	0	0	0	0	0	12548.5	1	1	49.1849	56.9643
DATA	945	12	10	0	0	A_64_P351634	NM_001029901	10128.9	264.5	1.996690e+002	2.036188e+001	273	61	1.246184e+001	0	0	0	0	0	0	188.635	1	1	56.9804	59.9512
DATA	946	12	11	0	0	A_64_P136597	A_64_P136597	10154.4	264.427	7.759679e+002	7.769885e+001	810	59	1.284155e+001	0	0	0	0	0	0	734.896	1	1	57.5363	59.697
DATA	947	12	12	0	0	A_64_P052017	ENSRNOT00000033592	10179.6	264.427	6.638480e+000	4.027483e+000	91.5	64	1.102761e+001	0	0	0	0	0	0	6.30118	1	0	57.5363	62.9474
DATA	948	12	13	0	0	A_44_P444485	TC589779	10204.2	264.863	2.163701e+003	2.164064e+002	2086.5	56	1.510665e+001	0	0	0	0	0	0	2057.99	1	1	47.5395	57.1951
DATA	949	12	14	0	0	A_44_P147373	XM_226249	10229.8	264.6	2.094458e+003	2.094832e+002	2028	55	1.059130e+001	0	0	0	0	0	0	1995.79	1	1	49.1849	57.7805
DATA	950	12	15	0	0	A_64_P059939	NM_001134540	10255.2	264.851	3.731051e+004	3.731053e+003	34657.5	55	7.867587e+000	0	0	0	0	0	0	35612.9	1	1	47.8731	57.0323
DATA	951	12	16	0	0	A_42_P637279	NM_012743	10280.3	264.487	3.958180e+000	3.945441e+000	83	57	8.782314e+000	0	0	0	0	0	0	0.644709	0	0	49.1849	55.9355
DATA	952	12	17	0	0	A_42_P771570	XM_001080365	10306.1	264.627	5.158799e+002	5.173821e+001	566	58	1.055557e+001	0	0	0	0	0	0	493.722	1	1	51.4001	58.5957
DATA	953	12	18	0	0	A_43_P12942	NM_053817	10332	264.455	6.288676e+003	6.288799e+002	5801	57	1.117899e+001	0	0	0	0	0	0	6024.81	1	1	55.8519	57.8286
DATA	954	12	19	0	0	A_64_P053307	NM_001191900	10357.1	264.182	9.050118e+000	4.035373e+000	90	55	1.186165e+001	0	0	0	0	0	0	8.67726	1	0	46.1809	57.5854
DATA	955	12	20	0	0	A_42_P595630	NM_001013189	10382	264.657	5.001708e+003	5.001863e+002	4855	60	9.465266e+000	0	0	0	0	0	0	4799.02	1	1	45.4864	59.9643
DATA	956	12	21	0	0	A_64_P154760	A_64_P154760	10408.3	264.5	5.848026e+002	5.861203e+001	642.5	63	1.051066e+001	0	0	0	0	0	0	561.353	1	1	65	62.9535
DATA	957	12	22	0	0	A_42_P764359	NM_145086	10432.8	264.884	1.251495e+003	1.252111e+002	1278	69	1.094355e+001	0	0	0	0	0	0	1201.68	1	1	46.5243	67.3429
DATA	958	12	23	0	0	A_43_P10405	NM_001109257	10459	264.455	3.418756e+001	5.206562e+000	113	62	1.297387e+001	0	0	0	0	0	0	32.8266	1	1	65	64.8919
DATA	959	12	24	0	0	A_44_P269950	ENSRNOT00000014054	10484.5	264.5	2.177612e+001	4.490685e+000	105	60.5	1.559053e+001	0	0	0	0	0	0	20.9066	1	1	65	60.2308
DATA	960	12	25	0	0	A_44_P160763	NM_001106513	10509.3	264.681	1.812270e+002	1.854361e+001	255	60	1.098226e+001	0	0	0	0	0	0	173.942	1	1	46.5243	57.88
DATA	961	12	26	0	0	A_64_P127678	NM_001008553	10534.6	264.405	1.011771e+003	1.012534e+002	1036	70.5	1.393047e+001	0	0	0	0	0	0	970.571	1	1	49.5074	69.1667
DATA	962	12	27	0	0	A_42_P684885	NM_133517	10559.9	263.762	3.946981e+000	3.945738e+000	84	60	1.174703e+001	0	0	0	0	0	0	2.95165	0	0	36.5637	63.0851
DATA	963	12	28	0	0	A_64_P102708	NM_001034149	10585.9	264.5	6.051647e+001	7.219445e+000	133	54	1.691413e+001	0	0	0	0	0	0	57.9619	1	1	56.9804	60.0938
DATA	964	12	29	0	0	A_42_P547629	NM_001106718	10611.5	264.5	5.093655e+002	5.108877e+001	577	53	9.047940e+000	0	0	0	0	0	0	487.347	1	1	57.5363	52.8478
DATA	965	12	30	0	0	A_42_P522285	NM_001044263	10635.8	264.935	3.984496e+002	4.003980e+001	458	50.5	1.120733e+001	0	0	0	0	0	0	380.808	1	1	49.5074	51.1765
DATA	966	12	31	0	0	A_64_P164423	NM_057193	10662.3	264.5	1.499411e+001	4.226202e+000	95	54	1.297328e+001	0	0	0	0	0	0	14.3084	1	0	65	56.4878
DATA	967	12	32	0	0	A_44_P256143	NM_001047917	10687.5	264.5	1.856864e+002	1.898566e+001	259.5	56	1.194325e+001	0	0	0	0	0	0	176.919	1	1	57.5363	57.4324
DATA	968	12	33	0	0	A_44_P727294	NM_001160314	10712.1	264.94	2.607789e+003	2.608090e+002	2404	59	6.967378e+000	0	0	0	0	0	0	2480.69	1	1	46.8651	58.3125
DATA	969	12	34	0	0	A_64_P108404	NM_001000092	10738.4	264.573	7.319580e+001	8.327734e+000	150.5	54.5	1.404343e+001	0	0	0	0	0	0	69.4878	1	1	57.5363	55.25
DATA	970	12	35	0	0	A_44_P520829	NM_001108777	10762.8	264.884	6.350364e+002	6.362820e+001	678	53	1.127549e+001	0	0	0	0	0	0	601.716	1	1	46.5243	53.5946
DATA	971	12	36	0	0	A_44_P229677	NM_001014221	10789.1	264.5	1.527005e+003	1.527526e+002	1563	54	1.138689e+001	0	0	0	0	0	0	1443.49	1	1	56.9804	53.625
DATA	972	12	37	0	0	A_64_P126215	A_64_P126215	10814.5	264.5	4.038213e+001	5.682621e+000	110	56	1.385507e+001	0	0	0	0	0	0	38.0836	1	1	57.5363	57.8095
DATA	973	12	38	0	0	A_64_P090035	A_64_P090035	10839.4	264.946	5.124096e+003	5.124253e+002	5029.5	60	1.113514e+001	0	0	0	0	0	0	4821.02	1	1	49.1849	61.4839
DATA	974	12	39	0	0	A_64_P089330	ENSRNOT00000012374	10865.4	264.573	1.698725e+002	1.745615e+001	242	69	1.658285e+001	0	0	0	0	0	0	159.382	1	1	57.5363	70.8108
DATA	975	12	40	0	0	A_44_P454429	NM_012712	10891	263.781	1.210660e+002	1.275992e+001	196	107	3.838510e+001	0	0	0	0	1	0	113.255	1	1	45.4864	113.889
DATA	976	12	41	0	1	ERCC-00144_60	ERCC-00144_60	10913.3	265.36	2.444961e+001	4.721998e+000	107	78	1.915304e+001	0	0	0	0	1	0	22.8205	1	1	50.4627	80.623
DATA	977	12	42	0	0	A_42_P759843	XR_086347	10940.5	264.662	3.764323e+003	3.764541e+002	3585	70	1.365936e+001	0	0	0	0	0	0	3501.68	1	1	46.5243	69.6047
DATA	978	12	43	0	0	A_43_P14264	NM_053653	10966.6	265.31	8.867063e+002	8.876381e+001	870	82	7.396513e+001	0	0	1	0	1	0	822.261	1	1	47.5395	108.818
DATA	979	12	44	0	0	A_64_P011223	NM_024353	10992.4	264.573	2.719733e+002	2.750169e+001	379.5	114	9.169478e+001	0	0	1	0	1	0	251.333	1	1	65	142.41
DATA	980	12	45	0	0	A_42_P701169	NM_001109572	11016.8	265.408	2.007248e+003	2.007665e+002	1905	72.5	2.823226e+001	0	0	0	0	1	0	1849.17	1	1	46.5243	80.3125
DATA	981	12	46	0	0	A_64_P143307	NM_001014106	11043	264.545	2.872849e+002	2.902077e+001	351	62	9.698686e+000	0	0	0	0	0	0	263.665	1	1	55.8519	62
DATA	982	12	47	0	0	A_44_P480636	NM_001005381	11067.4	265.441	2.985186e+002	3.013508e+001	352.5	56	1.457900e+001	0	0	0	0	0	0	273.08	1	1	46.1809	60.2121
DATA	983	12	48	0	0	A_64_P163564	ENSRNOT00000010609	11093.6	264.573	7.167392e+001	8.276273e+000	148	58	1.289583e+001	0	0	0	0	0	0	65.3054	1	1	57.5363	60.8571
DATA	984	12	49	0	0	A_42_P774028	NM_001017447	11118.4	264.93	3.044154e+003	3.044437e+002	2720	57	7.571217e+000	0	0	0	0	0	0	2763.65	1	1	47.5395	59.36
DATA	985	12	50	0	0	A_43_P20110	ENSRNOT00000050558	11144.6	264.573	3.664900e+001	5.551739e+000	112	67.5	1.119337e+001	0	0	0	0	0	0	33.1371	1	1	57.5363	66.2647
DATA	986	12	51	0	0	A_44_P552865	NM_001170399	11170	264.545	6.723597e+002	6.736620e+001	675	66	1.645296e+001	0	0	0	0	0	0	605.532	1	1	55.8519	67.7
DATA	987	12	52	0	0	A_43_P17428	NM_001012189	11194.8	265.197	4.562685e+002	4.581998e+001	508	57	8.575799e+000	0	0	0	0	0	0	409.367	1	1	45.835	58.4828
DATA	988	12	53	0	0	A_64_P146222	TC633165	11220.2	265.254	2.268934e+004	2.268938e+003	19887.5	57	1.081954e+001	0	0	0	0	0	0	20274.4	1	1	45.835	57.7059
DATA	989	12	54	0	0	A_64_P054856	NM_001135894	11245.4	265.129	5.600200e+002	5.616206e+001	581	60	1.215571e+001	0	0	0	0	0	0	498.355	1	1	46.8651	62.8065
DATA	990	12	55	0	0	A_64_P154982	ENSRNOT00000018118	11270.6	265.239	1.351602e+004	1.351608e+003	11898	58	1.049765e+001	0	0	0	0	0	0	11978.2	1	1	46.5243	57.8438
DATA	991	12	56	0	0	A_42_P726363	NM_031536	11297	264.545	3.946747e+001	5.817584e+000	116	62	1.316771e+001	0	0	0	0	0	0	34.8182	1	1	65	60.2128
DATA	992	12	57	0	0	A_64_P139685	A_64_P139685	11322.4	264.573	2.196157e+001	4.821519e+000	100	59	1.364399e+001	0	0	0	0	0	0	19.292	1	1	57.5363	60.0222
DATA	993	12	58	0	0	A_64_P114104	NM_001034136	11346.8	265.129	7.474798e+003	7.474922e+002	6350	62	1.185718e+001	0	0	0	0	0	0	6539.94	1	1	46.8651	63.0303
DATA	994	12	59	0	0	A_42_P480273	A_42_P480273	11372.6	264.8	7.420519e+003	7.420646e+002	6377	63	1.202415e+001	0	0	0	0	0	0	6463.55	1	1	51.7088	62.8611
DATA	995	12	60	0	0	A_64_P004344	ENSRNOT00000047696	11397.8	264.882	1.174904e+004	1.174912e+003	10115	65	9.864850e+000	0	0	0	0	0	0	10190.2	1	1	46.5243	65.6207
DATA	996	12	61	0	0	A_42_P723584	NM_001109099	11423.2	265.191	3.280335e+003	3.280625e+002	2766.5	60	1.550266e+001	0	0	0	0	0	0	2832.98	1	1	46.1809	60.1944
DATA	997	12	62	0	0	A_64_P114813	A_64_P114813	11449.6	265.066	2.047083e+001	4.839987e+000	101	61.5	1.337809e+001	0	0	0	0	0	0	17.5993	1	0	49.1849	59.7647
DATA	998	12	63	0	0	A_64_P034551	NM_053818	11474.1	265.377	1.332645e+002	1.403524e+001	201	55.5	9.827225e+000	0	0	0	0	0	0	114.101	1	1	46.1809	57.2
DATA	999	12	64	0	0	A_42_P492976	NM_001126099	11500.1	264.614	3.043994e+002	3.075975e+001	338.5	65	1.425497e+001	0	0	0	0	0	0	259.438	1	1	57.259	66.3421
DATA	1000	12	65	0	0	A_64_P141799	NM_001025709	11524.8	265.129	1.120312e+003	1.121192e+002	1020.5	63.5	1.585414e+001	0	0	0	0	0	0	950.974	1	1	46.8651	65.4688
DATA	1001	12	66	0	0	A_44_P337088	NM_133609	11550.2	265.058	8.404480e+002	8.416311e+001	796.5	59.5	1.479847e+001	0	0	0	0	0	0	710.377	1	1	46.5243	61.4286
DATA	1002	12	67	0	0	A_64_P137961	A_64_P137961	11576.4	264.573	8.480005e+001	9.591051e+000	154	61	1.088521e+001	0	0	0	0	0	0	71.3583	1	1	57.5363	60.5227
DATA	1003	12	68	0	0	A_64_P053822	ENSRNOT00000028268	11601.5	264.648	9.068832e+001	1.012354e+001	160.5	62	1.235457e+001	0	0	0	0	0	0	76.0024	1	1	57.5363	61.8
DATA	1004	12	69	0	0	A_42_P484456	NM_001106601	11626.3	265.338	4.255377e+003	4.255616e+002	3638	59	1.575515e+001	0	0	0	1	0	0	3552.65	1	1	47.5395	65.0313
DATA	1005	12	70	0	0	A_44_P508632	NM_001107594	11651.9	264.619	2.413630e+001	5.137749e+000	100	59	1.425805e+001	0	0	0	0	0	0	20.0655	1	1	44.7812	62.5333
DATA	1006	12	71	0	0	A_64_P080598	NM_001047865	11677.6	264.931	4.899180e+001	6.688369e+000	121.5	74	1.503780e+001	0	0	0	0	0	0	40.57	1	1	53.8203	72.2759
DATA	1007	12	72	0	0	A_64_P144243	A_64_P144243	11703.4	264.931	2.660062e+001	5.288738e+000	104	70	1.455331e+001	0	0	0	0	0	0	21.9421	1	1	53.8203	72.0811
DATA	1008	12	73	0	0	A_44_P479917	NM_030864	11727.6	264.954	3.870261e+001	6.001927e+000	112	64	1.061399e+001	0	0	0	0	0	0	31.8112	1	1	44.7812	62.8519
DATA	1009	12	74	0	0	A_44_P974524	NM_001025764	11754	265	5.218898e+001	6.959930e+000	124	69	1.397892e+001	0	0	0	0	0	0	42.7345	1	1	54.9904	72.5556
DATA	1010	12	75	0	0	A_42_P522899	NM_021578	11778.6	265.178	1.851444e+002	1.908223e+001	231	74	1.119653e+001	0	0	0	0	0	0	151.093	1	1	48.2044	74.1667
DATA	1011	12	76	0	0	A_64_P069892	NM_019201	11804	265.183	3.021371e+004	3.021374e+003	24141	75.5	2.232408e+001	0	0	0	0	0	0	24573.6	1	1	46.8651	79.3824
DATA	1012	12	77	0	0	A_44_P415199	NM_001108748	11830.4	264.931	4.047728e+001	6.166400e+000	112	62	1.218271e+001	0	0	0	0	0	0	32.8084	1	1	53.8203	63.0313
DATA	1013	12	78	0	0	A_64_P034610	NM_022622	11855.5	265	1.674728e+002	1.738517e+001	207	61	1.158132e+001	0	0	0	0	0	0	135.33	1	1	65	61.7576
DATA	1014	12	79	0	0	A_42_P473828	ENSRNOT00000035309	11880.3	265.095	3.354798e+003	3.355124e+002	2734.5	68	1.157294e+001	0	0	0	1	0	0	2703.22	1	1	48.8603	67.1364
DATA	1015	12	80	66	1	DarkCorner	DarkCorner	11906.1	265.444	4.708076e+000	4.692238e+000	77	64.5	1.112622e+001	0	0	0	0	0	0	-2.91941	0	0	41.4593	65.9167
DATA	1016	12	81	66	1	DarkCorner	DarkCorner	11932	265.419	4.720497e+000	4.704617e+000	78	61	7.769663e+000	0	0	0	0	0	0	-0.276967	0	0	36.5637	62.3256
DATA	1017	12	82	66	1	DarkCorner	DarkCorner	11956.7	265.228	4.731678e+000	4.732611e+000	82	58	1.081481e+001	0	0	0	0	0	0	3.19035	0	0	49.5074	59.037
DATA	1018	12	83	66	1	DarkCorner	DarkCorner	11982.5	265	4.742461e+000	4.726507e+000	80.5	61.5	1.305799e+001	0	0	0	0	0	0	-2.87774	0	0	54.1152	63.0556
DATA	1019	12	84	66	1	DarkCorner	DarkCorner	12008.3	264.628	4.752350e+000	4.736363e+000	77	58.5	1.056533e+001	0	0	0	0	0	0	-5.48664	0	0	49.1849	58.1154
DATA	1020	12	85	66	1	DarkCorner	DarkCorner	12033.5	265	6.727685e+000	4.791598e+000	86	50	9.906948e+000	0	0	0	0	0	0	5.34706	1	0	54.1152	50.9714
DATA	1021	13	1	66	1	DarkCorner	DarkCorner	9887.58	271.573	4.136902e+000	4.122986e+000	81	55	1.176218e+001	0	0	0	0	0	0	-0.918951	0	0	57.5363	56.5302
DATA	1022	13	2	66	1	DarkCorner	DarkCorner	9913.3	271.828	4.118416e+000	4.104561e+000	76.5	59	1.067810e+001	0	0	0	0	0	0	-5.92976	0	0	51.7088	57.5143
DATA	1023	13	3	66	1	DarkCorner	DarkCorner	9938.02	272.042	4.101533e+000	4.087735e+000	76	52	9.857315e+000	0	0	0	0	0	0	-4.95689	0	0	37.847	53.3333
DATA	1024	13	4	66	1	DarkCorner	DarkCorner	9963.67	271.5	4.085378e+000	4.071634e+000	70	60	1.300678e+001	0	0	0	0	0	0	-11.6541	0	0	57.5363	60.2813
DATA	1025	13	5	66	1	DarkCorner	DarkCorner	9989.33	271.5	4.069778e+000	4.056087e+000	76	57	1.140508e+001	0	0	0	0	0	0	-7.21574	0	0	57.5363	59.5
DATA	1026	13	6	0	0	A_64_P029912	NM_001109143	10014.9	272.013	1.533808e+002	1.586153e+001	220.5	54	1.432826e+001	0	0	0	0	0	0	143.108	1	1	47.5395	56.6286
DATA	1027	13	7	0	0	A_42_P574731	NM_012948	10039.4	272	4.842139e+003	4.842306e+002	4437	55	1.220448e+001	0	0	0	0	0	0	4532.61	1	1	48.5334	55.4167
DATA	1028	13	8	0	0	A_44_P137448	NM_017043	10064.6	272.129	7.101762e+002	7.113104e+001	755	54	8.560413e+000	0	0	0	0	0	0	666.9	1	1	46.8651	54.6857
DATA	1029	13	9	0	0	A_42_P770614	NM_001013235	10090.2	271.667	3.926237e+004	3.926239e+003	36367.5	58.5	9.135464e+000	0	0	0	1	0	0	36978.1	1	1	49.1849	56.1364
DATA	1030	13	10	0	0	A_42_P785419	NM_199501	10115.5	271.833	2.630572e+002	2.660695e+001	324	59	1.223665e+001	0	0	0	0	0	0	248.444	1	1	47.8731	58.0833
DATA	1031	13	11	0	0	A_42_P581043	TC622715	10141.1	271.75	8.986556e+003	8.986644e+002	8177.5	60	1.139564e+001	0	0	0	0	0	0	8509.25	1	1	47.8731	59.6316
DATA	1032	13	12	0	0	A_64_P098532	NM_001029928	10167	271.545	1.487584e+001	4.241998e+000	92	62.5	1.326418e+001	0	0	0	0	0	0	14.1192	1	0	55.8519	62.5385
DATA	1033	13	13	0	0	A_64_P090758	A_64_P090758	10191.7	271.816	1.176372e+003	1.177040e+002	1204	57.5	1.379794e+001	0	0	0	0	0	0	1118.93	1	1	49.5074	56.9375
DATA	1034	13	14	0	0	A_43_P12079	NM_021583	10217.6	271.573	6.304959e+001	7.443477e+000	143	58	1.427802e+001	0	0	0	0	0	0	60.0885	1	1	57.5363	61.1622
DATA	1035	13	15	0	0	A_64_P001947	A_64_P001947	10243.4	271.573	1.260336e+001	4.145562e+000	96	58	1.058296e+001	0	0	0	0	0	0	12.0328	1	0	57.5363	57.5313
DATA	1036	13	16	0	0	A_64_P064461	A_64_P064461	10268.6	271.573	4.444204e+001	5.941419e+000	124	54	8.771409e+000	0	0	0	0	0	0	42.4953	1	1	57.5363	53.8235
DATA	1037	13	17	0	0	A_42_P575398	NM_020538	10294	271.545	3.951290e+000	3.949873e+000	85	59	9.389747e+000	0	0	0	0	0	0	2.93049	0	0	55.8519	56.8718
DATA	1038	13	18	0	0	A_42_P482623	NM_199463	10318.8	271.944	1.952338e+003	1.952734e+002	1949.5	61	1.136673e+001	0	0	0	0	0	0	1871.53	1	1	46.8651	61.814
DATA	1039	13	19	0	0	A_42_P738431	NM_019175	10343.9	271.812	2.191652e+003	2.192004e+002	2109	56	1.438848e+001	0	0	0	0	0	0	2102.88	1	1	46.8651	59.5625
DATA	1040	13	20	0	0	A_44_P1027780	ENSRNOT00000065815	10370.2	271.57	2.420235e+001	4.612751e+000	107	54.5	1.063614e+001	0	0	0	0	0	0	23.2392	1	1	65	56.725
DATA	1041	13	21	0	0	A_42_P479802	NM_053679	10394.7	272.06	1.955284e+003	1.955678e+002	1942	64	9.700919e+000	0	0	0	1	0	0	1878.62	1	1	45.835	63.4091
DATA	1042	13	22	0	0	A_44_P496624	NM_022302	10420.9	271.593	1.045103e+002	1.116316e+001	183	62	1.171034e+001	0	0	0	0	0	0	100.443	1	1	56.9804	64.0811
DATA	1043	13	23	0	0	A_42_P700753	FQ212883	10445.4	272.265	2.609271e+003	2.609565e+002	2500	60	1.310291e+001	0	0	0	0	0	0	2508.38	1	1	46.5243	64.3784
DATA	1044	13	24	0	0	A_44_P229299	NM_001100678	10471.3	272.269	5.647522e+002	5.661127e+001	628	62	1.529112e+001	0	0	0	0	0	0	542.903	1	1	46.1809	64.8056
DATA	1045	13	25	0	0	A_42_P728472	NM_001007600	10496.3	271.662	9.706473e+003	9.706553e+002	8977.5	64	1.096540e+001	0	0	0	0	0	0	9328.12	1	1	48.5334	64.36
DATA	1046	13	26	0	0	A_42_P488904	NM_001108947	10521.6	271.853	1.182145e+004	1.182152e+003	10992	64.5	1.670707e+001	0	0	0	1	0	0	11356.5	1	1	48.8603	68.6154
DATA	1047	13	27	0	0	A_42_P458494	NM_001034951	10547	271.672	1.687949e+002	1.733035e+001	237	66	1.211339e+001	0	0	0	0	0	0	162.057	1	1	44.0646	65.0513
DATA	1048	13	28	0	0	A_64_P100331	ENSRNOT00000048614	10573.4	271.573	2.421534e+001	4.616591e+000	105	61	1.053139e+001	0	0	0	0	0	0	23.2298	1	1	57.5363	62.6087
DATA	1049	13	29	0	0	A_64_P113989	NM_181631	10597.6	272.155	1.333419e+004	1.333425e+003	12054	53	8.177829e+000	0	0	0	0	0	0	12781.2	1	1	47.5395	53.4242
DATA	1050	13	30	0	0	A_64_P042105	ENSRNOT00000061599	10624.1	271.614	5.111217e+001	6.452720e+000	130	54	1.012032e+001	0	0	0	0	0	0	48.9307	1	1	57.259	54.7674
DATA	1051	13	31	0	0	A_64_P044435	NM_001015020	10649	272.424	7.857070e+002	7.866958e+001	830	55	1.462486e+001	0	0	0	0	0	0	751.316	1	1	45.4864	57.4615
DATA	1052	13	32	0	0	A_64_P149011	NM_031352	10673.9	272.418	5.129470e+003	5.129622e+002	4867	56	1.133165e+001	0	0	0	0	0	0	4897.9	1	1	45.835	57.4103
DATA	1053	13	33	0	0	A_42_P580844	NM_019296	10700.4	271.573	3.997128e+002	4.016658e+001	456.5	58	1.026931e+001	0	0	0	0	0	0	380.964	1	1	57.5363	59.8
DATA	1054	13	34	0	0	A_64_P052972	A_64_P052972	10724.8	272.09	2.109632e+002	2.146526e+001	285	56	1.250016e+001	0	0	0	0	0	0	200.739	1	1	46.1809	55.0625
DATA	1055	13	35	0	0	A_44_P454300	NM_001003979	10751	271.681	2.682823e+001	5.278018e+000	96.5	51	1.245530e+001	0	0	0	0	0	0	25.4747	1	1	58.0869	52.4286
DATA	1056	13	36	0	0	A_44_P149743	ENSRNOT00000005476	10776.6	272.362	9.103779e+001	9.935319e+000	160	52	1.240957e+001	0	0	0	0	0	0	86.2706	1	1	39.4933	51.95
DATA	1057	13	37	0	0	A_42_P841017	NM_173309	10800.6	272	6.807511e+003	6.807628e+002	6413	55	1.196768e+001	0	0	0	0	0	0	6436.84	1	1	48.5334	54.4444
DATA	1058	13	38	0	0	A_44_P206844	NM_013074	10827.4	271.596	1.232305e+002	1.295540e+001	200	55	1.243123e+001	0	0	0	0	0	0	116.217	1	1	65	55.7105
DATA	1059	13	39	0	0	A_64_P073400	NM_001000705	10852.5	272	1.276755e+002	1.338186e+001	202	60	1.316069e+001	0	0	0	0	0	0	120.113	1	1	54.1152	62.1795
DATA	1060	13	40	0	0	A_64_P066676	A_64_P066676	10877.9	271.935	3.165157e+001	5.115597e+000	107	75.5	2.285605e+001	0	0	0	0	0	0	29.6961	1	1	54.4085	79.7045
DATA	1061	13	41	0	0	A_44_P386965	NM_001134594	10903.5	271.759	1.790916e+001	4.410437e+000	97	87.5	3.001156e+001	0	0	0	0	1	0	16.7543	1	0	42.9674	95.1304
DATA	1062	13	42	0	0	A_64_P095895	NM_019338	10928.5	272	1.051928e+002	1.126914e+001	178.5	71	1.491566e+001	0	0	0	0	0	0	98.1272	1	1	54.1152	72.8491
DATA	1063	13	43	1028	1	(+)E1A_r60_a22	E1A_r60_a22	10953.7	272.027	1.489596e+002	1.543787e+001	223	55.5	9.740008e+000	0	0	0	0	0	0	138.531	1	1	49.1849	55.7917
DATA	1064	13	44	0	0	A_42_P541625	NM_001126090	10978.5	272	2.451879e+004	2.451882e+003	21886	111	7.930287e+001	0	0	1	0	1	0	22730.8	1	1	48.5334	134.829
DATA	1065	13	45	0	0	A_64_P033895	NM_001126084	11004.9	271.935	2.415011e+002	2.449254e+001	300	99.5	5.192550e+001	0	0	0	0	1	0	223.116	1	1	54.4085	110.5
DATA	1066	13	46	0	0	A_64_P012546	NM_022300	11030.5	272	7.501373e+004	7.501374e+003	67166.5	64	1.804516e+001	0	0	0	0	0	0	69064.5	1	1	54.1152	67.1935
DATA	1067	13	47	0	0	A_42_P495598	NM_001014026	11055.5	272	4.123504e+000	4.110091e+000	81	62	1.303737e+001	0	0	0	0	0	0	0.563332	0	0	65	61.4828
DATA	1068	13	48	0	0	A_42_P483463	NM_001130999	11080.3	272.12	5.148340e+003	5.148505e+002	4655	55.5	1.275144e+001	0	0	0	0	0	0	4706.92	1	1	50.1463	56.9722
DATA	1069	13	49	0	0	A_42_P575104	NM_153737	11106.5	272	1.329523e+002	1.392493e+001	205	55.5	1.107614e+001	0	0	0	0	0	0	121.085	1	1	54.1152	58.5294
DATA	1070	13	50	0	0	A_42_P461726	NM_133549	11131.4	272.123	2.379551e+001	4.788572e+000	104	65.5	9.205446e+000	0	0	0	0	0	0	21.5913	1	1	48.5334	64.4667
DATA	1071	13	51	0	0	A_64_P098688	A_64_P098688	11156.4	272	1.029071e+005	1.029071e+004	93291	69.5	1.368513e+001	0	0	0	0	0	0	93014.9	1	1	48.5334	68.6
DATA	1072	13	52	0	0	A_64_P105797	A_64_P105797	11182.2	271.864	7.171147e+001	8.304748e+000	146	66	1.508685e+001	0	0	0	0	0	0	64.556	1	1	46.1809	70
DATA	1073	13	53	0	0	A_42_P545943	NM_019291	11207.3	272.118	6.686477e+003	6.686609e+002	5765	58	1.060823e+001	0	0	0	0	0	0	5995.66	1	1	48.8603	59.9655
DATA	1074	13	54	0	0	A_44_P520045	NM_001001371	11233.5	272	1.447346e+002	1.507694e+001	210.5	59	1.191623e+001	0	0	0	0	0	0	129.231	1	1	54.1152	59.9412
DATA	1075	13	55	0	0	A_44_P306964	NM_001012184	11258.5	272	6.384729e+001	7.664467e+000	142	56.5	1.273402e+001	0	0	0	0	0	0	56.7756	1	1	54.1152	58.3462
DATA	1076	13	56	0	0	A_44_P156043	NM_001039012	11283.3	272.333	2.315279e+003	2.315671e+002	2101	63	1.377316e+001	0	0	0	0	0	0	2050.56	1	1	46.8651	62.6
DATA	1077	13	57	0	0	A_64_P054686	TC585752	11309.1	272.099	2.379684e+004	2.379688e+003	20324	61	1.306088e+001	0	0	0	0	0	0	20984.6	1	1	46.8651	60.3333
DATA	1078	13	58	0	0	A_42_P575104	NM_153737	11335	272	1.399550e+002	1.463959e+001	198	61	1.407117e+001	0	0	0	0	0	0	122.877	1	1	54.9904	63.7419
DATA	1079	13	59	0	0	A_64_P142194	NM_053426	11360	272.043	1.339926e+003	1.340620e+002	1239	64.5	1.226843e+001	0	0	0	0	0	0	1171.47	1	1	46.8651	64.9706
DATA	1080	13	60	0	0	A_64_P043314	A_64_P043314	11385.5	272	7.034917e+001	8.261496e+000	139	67	1.266849e+001	0	0	0	0	0	0	61.2382	1	1	54.1152	67.7429
DATA	1081	13	61	0	0	A_44_P684315	NM_001109104	11410.3	272.12	4.348109e+004	4.348111e+003	36013	66.5	1.257776e+001	0	0	0	0	0	0	37691	1	1	48.8603	65.1667
DATA	1082	13	62	0	0	A_64_P142620	NM_201417	11435.8	272.467	5.808155e+001	7.267540e+000	133.5	60	1.481766e+001	0	0	0	0	0	0	50.1334	1	1	48.2044	59.7838
DATA	1083	13	63	0	0	A_42_P568419	NM_001011894	11461.3	272.21	2.091988e+003	2.092448e+002	1851	61	1.074595e+001	0	0	0	0	0	0	1797.79	1	1	49.8279	58.7586
DATA	1084	13	64	0	0	A_42_P519868	NM_053906	11486.9	272.588	8.622281e+001	9.682927e+000	157.5	64.5	1.382749e+001	0	0	0	0	0	0	73.7828	1	1	46.8651	64.925
DATA	1085	13	65	0	0	A_43_P12346	NM_022943	11512.6	272.427	1.538520e+002	1.600908e+001	214	71	1.265519e+001	0	0	0	0	0	0	131.08	1	1	57.5363	68.6667
DATA	1087	13	67	0	0	A_44_P556989	NM_012610	11562.8	272.731	7.103751e+001	8.389136e+000	143	62	9.915441e+000	0	0	0	0	0	0	60.0221	1	1	45.835	60.5143
DATA	1088	13	68	0	0	A_64_P113079	XM_218149	11588.9	273.234	1.529102e+001	4.734907e+000	94	65	1.099669e+001	0	0	0	0	0	0	12.8661	1	0	45.4864	64.0667
DATA	1089	13	69	0	0	A_64_P003937	NM_173111	11613.4	272.444	5.467536e+003	5.467722e+002	4405.5	61	1.394941e+001	0	0	0	0	0	0	4581.49	1	1	48.2044	62.8846
DATA	1090	13	70	0	0	A_42_P771337	NM_001012015	11639.6	272.154	8.934025e+001	1.001185e+001	155	58	1.265927e+001	0	0	0	0	0	0	74.5455	1	1	44.7812	59.9143
DATA	1091	13	71	0	0	A_44_P401035	A_44_P401035	11665.1	272.386	8.183723e+001	9.357092e+000	154	66	1.671551e+001	0	0	0	0	0	0	68.0166	1	1	65	67.5294
DATA	1092	13	72	0	0	A_42_P536292	NM_033359	11689.8	272.72	9.268435e+002	9.279614e+001	846	69.5	1.547654e+001	0	0	0	0	0	0	767.469	1	1	49.1849	70.3438
DATA	1093	13	73	0	0	A_44_P128564	NM_001109121	11715.9	272.386	1.658275e+002	1.720140e+001	218	64.5	1.170773e+001	0	0	0	0	0	0	136.768	1	1	57.259	65.0476
DATA	1094	13	74	0	0	A_64_P069957	NM_173315	11741.8	272.788	2.405856e+001	5.180975e+000	102	64	9.913426e+000	0	0	0	0	0	0	19.7699	1	1	50.4627	64.1923
DATA	1095	13	75	0	0	A_44_P538691	NM_031772	11766.5	272.224	1.715979e+002	1.776697e+001	223	70	1.292850e+001	0	0	0	0	0	0	140.501	1	1	49.5074	73.5789
DATA	1096	13	76	0	0	A_44_P499231	NM_001034148	11792	272.455	3.651359e+002	3.680481e+001	373.5	75	2.236511e+001	0	0	0	0	0	0	297.949	1	1	65	79.4857
DATA	1097	13	77	0	0	A_64_P121489	XM_001065883	11817.5	272.352	1.239232e+001	4.799096e+000	88.5	65	1.681248e+001	0	0	0	0	0	0	10.0782	1	0	57.5363	68.6471
DATA	1098	13	78	0	0	A_42_P507072	FQ213070	11842.1	272.5	4.775637e+003	4.775864e+002	3801.5	62.5	1.062365e+001	0	0	0	0	0	0	3872.04	1	1	49.8279	64.0526
DATA	1099	13	79	0	0	A_64_P120075	ENSRNOT00000027841	11868.4	272.427	3.600841e+002	3.630935e+001	368.5	68	9.564042e+000	0	0	0	0	0	0	291.037	1	1	57.5363	67.7143
DATA	1100	13	80	0	0	A_44_P1007362	NM_138864	11892.8	272.38	2.562023e+002	2.604380e+001	290	62	1.314911e+001	0	0	0	0	0	0	206.506	1	1	47.5395	66.5714
DATA	1101	13	81	66	1	DarkCorner	DarkCorner	11919	272.455	4.706674e+000	4.700991e+000	82	61	7.970740e+000	0	0	0	0	0	0	2.48185	0	0	55.8519	62.425
DATA	1102	13	82	66	1	DarkCorner	DarkCorner	11944.4	272.427	4.718449e+000	4.702717e+000	81	58	6.624470e+000	0	0	0	0	0	0	0.292012	0	0	57.5363	58.4286
DATA	1103	13	83	66	1	DarkCorner	DarkCorner	11969.8	272.873	4.728771e+000	4.716371e+000	83.5	59	1.548235e+001	0	0	0	0	0	0	1.4552	0	0	47.2035	61.6452
DATA	1104	13	84	66	1	DarkCorner	DarkCorner	11995.6	272.524	4.739163e+000	4.723220e+000	75	59	1.290136e+001	0	0	0	0	0	0	-7.39343	0	0	57.259	61.5152
DATA	1105	13	85	66	1	DarkCorner	DarkCorner	12019.9	272.438	4.747711e+000	4.731739e+000	78.5	54	1.157982e+001	0	0	0	0	0	0	-3.47523	0	0	55.8519	56.1
DATA	1106	14	1	66	1	DarkCorner	DarkCorner	9900.29	278.381	4.123486e+000	4.109614e+000	74	57	1.134860e+001	0	0	0	0	0	0	-6.26604	0	0	36.5637	57
DATA	1107	14	2	66	1	DarkCorner	DarkCorner	9925.52	278.892	4.105673e+000	4.091862e+000	76.5	56	1.116882e+001	0	0	0	0	0	0	-4.47976	0	0	44.7812	55.6471
DATA	1108	14	3	66	1	DarkCorner	DarkCorner	9950.7	279.13	4.088953e+000	4.075197e+000	71	53	1.093169e+001	0	0	0	0	0	0	-10.6789	0	0	37.847	56.2424
DATA	1109	14	4	66	1	DarkCorner	DarkCorner	9975.83	278.714	4.073516e+000	4.059812e+000	71	62.5	1.376799e+001	0	0	0	0	0	0	-8.06022	0	0	36.5637	62.5227
DATA	1110	14	5	66	1	DarkCorner	DarkCorner	10002	279.364	4.057725e+000	4.044075e+000	72	56	1.267494e+001	0	0	0	0	0	0	-11.1311	0	0	45.4864	59.0333
DATA	1111	14	6	0	0	A_64_P151415	NM_001191684	10027.5	279	2.935064e+002	2.962604e+001	355	51.5	9.905573e+000	0	0	0	0	0	0	274.599	1	1	54.1152	53.75
DATA	1112	14	7	0	0	A_42_P475623	NM_053394	10052.4	279.319	9.893232e+002	9.901384e+001	975.5	51.5	1.009661e+001	0	0	0	0	0	0	928.612	1	1	46.8651	54.6818
DATA	1113	14	8	0	0	A_44_P123636	ENSRNOT00000023689	10078.1	278.935	4.018349e+000	4.009481e+000	83	53.5	1.037687e+001	0	0	0	0	0	0	1.81746	0	0	54.4085	56.25
DATA	1114	14	9	0	0	A_64_P135207	ENSRNOT00000043866	10103	279	2.662891e+002	2.692670e+001	329	59	1.007083e+001	0	0	0	0	0	0	251.421	1	1	46.8651	57.037
DATA	1115	14	10	0	0	A_42_P516693	NM_001107330	10128.9	278.935	5.752690e+000	4.024052e+000	90	56	1.172613e+001	0	0	0	0	0	0	5.44624	1	0	65	56.8462
DATA	1116	14	11	0	0	A_64_P125447	NM_001109231	10154.1	278.956	1.311711e+002	1.370559e+001	204.5	60	1.135015e+001	0	0	0	0	0	0	124.488	1	1	46.8651	58.7027
DATA	1117	14	12	0	0	A_42_P701756	NM_001107646	10179.2	279.103	3.105079e+003	3.105332e+002	2964	57.5	1.432999e+001	0	0	0	0	0	0	2953.52	1	1	46.5243	59.5
DATA	1118	14	13	0	0	A_44_P344181	NM_017204	10205	279	8.781869e+002	8.790774e+001	882	58	1.342317e+001	0	0	0	0	0	0	837.061	1	1	54.9904	60.3714
DATA	1119	14	14	0	0	A_64_P035330	ENSRNOT00000066415	10229.8	279.194	3.812895e+002	3.833286e+001	446	58	1.208814e+001	0	0	0	0	0	0	364.103	1	1	47.5395	58.6579
DATA	1120	14	15	0	0	A_42_P837533	NM_001134546	10255.4	279.25	5.390976e+003	5.391121e+002	5134.5	55	1.184709e+001	0	0	0	0	0	0	5156.62	1	1	46.5243	56.7436
DATA	1121	14	16	0	0	A_42_P744291	NM_001025729	10280.9	279.21	1.914681e+003	1.915086e+002	1904	56	9.973082e+000	0	0	0	0	0	0	1834.11	1	1	49.5074	55.9355
DATA	1122	14	17	0	0	A_44_P149267	NM_001013099	10305.5	279.339	2.546700e+001	4.684131e+000	103.5	61	1.045553e+001	0	0	0	0	0	0	24.4255	1	1	42.2201	62
DATA	1123	14	18	0	0	A_64_P002546	NM_144741	10332	279	7.154622e+000	3.991841e+000	87	58	8.679478e+000	0	0	0	0	0	0	6.86925	1	0	54.9904	59.1111
DATA	1124	14	19	0	0	A_42_P808236	NM_001107189	10356.6	279.194	5.919547e+001	7.101939e+000	139	54.5	1.054388e+001	0	0	0	1	0	0	56.8831	1	1	46.5243	55.9348
DATA	1125	14	20	0	0	A_44_P425848	NM_001108747	10382.2	279.136	7.144538e+002	7.155290e+001	753.5	60	8.913322e+000	0	0	0	0	0	0	686.997	1	1	46.1809	58.7742
DATA	1126	14	21	0	0	A_43_P17405	TC612613	10407.8	279.162	1.195137e+002	1.257764e+001	199	65	1.120552e+001	0	0	0	0	0	0	114.975	1	1	47.8731	64.2326
DATA	1127	14	22	0	0	A_64_P022402	NM_001142304	10433.5	279	1.357004e+001	4.146747e+000	96	69	1.457160e+001	0	0	0	0	0	0	13.058	1	0	54.1152	66.8235
DATA	1128	14	23	0	0	A_44_P1019726	ENSRNOT00000025138	10458.5	279.127	2.200330e+002	2.234941e+001	288	63	1.255650e+001	0	0	0	0	0	0	211.75	1	1	47.8731	64.9706
DATA	1129	14	24	0	0	A_44_P128186	NM_053305	10484.5	279	1.001201e+002	1.075154e+001	182	63	1.211707e+001	0	0	0	0	0	0	96.3383	1	1	54.1152	63.1481
DATA	1130	14	25	0	0	A_44_P203665	NM_001105725	10509.6	279.427	1.435791e+002	1.488328e+001	224	62.5	1.437383e+001	0	0	0	0	0	0	138.124	1	1	57.5363	63.4583
DATA	1131	14	26	0	0	A_42_P688802	DV723748	10534.4	279	4.369352e+003	4.369528e+002	4205	71	1.849584e+001	0	0	0	0	0	0	4201.08	1	1	48.5334	69.8966
DATA	1132	14	27	0	0	A_64_P129943	NM_001105712	10559.7	279.127	4.383103e+002	4.400634e+001	508	63	1.247870e+001	0	0	0	0	0	0	421.159	1	1	45.1352	64.58
DATA	1133	14	28	0	0	A_64_P017577	NM_001106982	10585.9	279.386	1.410448e+001	4.172966e+000	95	63	1.287707e+001	0	0	0	0	0	0	13.5413	1	0	57.259	66.0833
DATA	1134	14	29	0	0	A_44_P235926	NM_024138	10610.2	279.568	3.510196e+002	3.532140e+001	421	57	1.070667e+001	0	0	0	0	0	0	336.684	1	1	48.8603	57.383
DATA	1135	14	30	0	0	A_42_P611638	NM_001034137	10635.9	279.538	1.235065e+003	1.235692e+002	1204	55	1.264249e+001	0	0	0	0	0	0	1183.19	1	1	50.1463	56.5294
DATA	1136	14	31	0	0	A_42_P654878	NM_001107919	10661.3	279.353	1.836698e+003	1.837121e+002	1763	56	1.288223e+001	0	0	0	0	0	0	1757.1	1	1	46.1809	57.7838
DATA	1137	14	32	0	0	A_64_P017464	NM_001135687	10687.1	279.392	6.412075e+000	3.999244e+000	88	57	1.040207e+001	0	0	0	0	0	0	6.12465	1	0	40.2912	60.3922
DATA	1138	14	33	0	0	A_64_P152873	NM_001207022	10712.9	279.386	6.628392e+001	7.718325e+000	147	56	9.637614e+000	0	0	0	0	0	0	63.203	1	1	57.259	57.9286
DATA	1139	14	34	0	0	A_64_P013243	A_64_P013243	10737.4	279.284	7.914098e+003	7.914197e+002	7396	61	1.167659e+001	0	0	0	0	0	0	7532.55	1	1	46.5243	59.0303
DATA	1140	14	35	0	0	A_64_P029720	NM_001109405	10763.3	279.222	2.847480e+002	2.875018e+001	340	50	1.119149e+001	0	0	0	0	0	0	270.46	1	1	47.8731	50.5778
DATA	1141	14	36	0	0	A_43_P13459	NM_001107548	10789.1	279.386	2.780843e+002	2.809157e+001	318	56	1.290601e+001	0	0	0	0	0	0	263.555	1	1	57.259	55.2609
DATA	1142	14	37	0	0	A_64_P053923	NM_001107323	10813.5	279.577	1.840072e+003	1.840504e+002	1815	55	1.293944e+001	0	0	0	0	0	0	1740.1	1	1	48.2044	55.5106
DATA	1143	14	38	0	0	A_44_P1005199	ENSRNOT00000032786	10839.1	279.952	8.767325e+001	9.635404e+000	168	56.5	1.122465e+001	0	0	0	0	0	0	82.7089	1	1	45.4864	58.6471
DATA	1144	14	39	0	0	A_44_P104821	NM_024369	10864.7	279.476	1.422969e+002	1.478330e+001	222	60.5	1.356836e+001	0	0	0	0	0	0	133.876	1	1	44.4243	62.7381
DATA	1145	14	40	0	0	A_64_P009956	A_64_P009956	10890.6	279.427	4.273149e+002	4.292007e+001	489	85.5	3.364900e+001	0	0	0	0	1	0	400.898	1	1	57.5363	94.4792
DATA	1146	14	41	0	0	A_64_P060947	NM_203334	10916	279.455	3.719063e+001	5.484275e+000	116.5	78	2.041434e+001	0	0	0	0	1	0	34.7911	1	1	55.8519	81.5
DATA	1147	14	42	0	0	A_64_P103419	NM_001106291	10941.4	279.427	1.036489e+001	4.173552e+000	94	66	2.190909e+001	0	0	0	0	0	0	9.66693	1	0	57.5363	71.3077
DATA	1148	14	43	0	0	A_44_P220827	NM_001012051	10966.9	279.026	8.513124e+002	8.522780e+001	852	111	8.005015e+001	0	0	1	0	1	0	791.429	1	1	46.8651	130.207
DATA	1149	14	44	0	1	ETG07_105829	ETG07_105829	10992.4	279.427	1.647824e+001	4.389815e+000	97.5	123.5	7.315148e+001	0	0	0	0	1	0	15.2704	1	0	57.5363	136.7
DATA	1150	14	45	0	0	A_42_P719478	NM_001191779	11017.6	279.427	3.909058e+001	5.652132e+000	117.5	64	4.373070e+001	0	0	0	0	1	0	36.1047	1	1	57.5363	82.8214
DATA	1151	14	46	0	0	A_42_P462257	NM_001109481	11042.4	279.583	1.229685e+004	1.229692e+003	11251	65	1.190095e+001	0	0	0	0	0	0	11319.5	1	1	48.2044	63.5152
DATA	1152	14	47	0	0	A_44_P105634	NM_001007658	11068.4	279.427	1.913913e+002	1.957572e+001	257.5	60	1.076488e+001	0	0	0	0	0	0	175.531	1	1	57.5363	61.1515
DATA	1153	14	48	0	0	A_64_P100594	NM_001000360	11093	279.672	5.431013e+001	6.820319e+000	133	57.5	1.277973e+001	0	0	0	0	0	0	49.6359	1	1	44.0646	60.9688
DATA	1154	14	49	0	0	A_64_P004266	A_64_P004266	11118.9	279.373	2.227386e+001	4.702700e+000	100	59	9.751292e+000	0	0	0	0	0	0	20.2776	1	1	45.835	61.4063
DATA	1155	14	50	0	0	A_44_P156343	NM_001000102	11144.6	279.427	1.456028e+001	4.405369e+000	95	62	1.297714e+001	0	0	0	0	0	0	13.2042	1	0	57.5363	60.9643
DATA	1156	14	51	0	0	A_42_P504358	NM_001108674	11169.5	279.614	3.239263e+002	3.266040e+001	370.5	72	1.292734e+001	0	0	0	0	0	0	292.644	1	1	47.5395	72.129
DATA	1157	14	52	0	0	A_44_P281468	NM_001127556	11195.4	279.427	2.449251e+001	4.854047e+000	103.5	65.5	9.125872e+000	0	0	0	0	0	0	22.0364	1	1	65	65.1923
DATA	1158	14	53	0	0	A_43_P12785	NM_053364	11220.5	279.613	4.221679e+000	4.215924e+000	84	59	1.282408e+001	0	0	0	0	0	0	2.39036	0	0	50.4627	59.6667
DATA	1159	14	54	0	0	A_64_P053297	NM_001107278	11246.3	279.5	3.177506e+003	3.177786e+002	2916	59.5	1.101301e+001	0	0	0	0	0	0	2835.61	1	1	57.5363	61.5625
DATA	1160	14	55	0	0	A_64_P062986	NM_001001018	11271.5	279.5	7.536235e+000	4.309053e+000	86.5	64	8.537339e+000	0	0	0	0	0	0	6.69768	1	0	65	62.6154
DATA	1161	14	56	0	0	A_44_P529226	NM_023091	11296.9	279.5	4.274895e+000	4.262782e+000	81.5	62	1.264235e+001	0	0	0	0	0	0	1.23041	0	0	56.9804	60.26
DATA	1162	14	57	0	0	A_42_P559737	NM_020074	11322.4	279.427	2.844079e+003	2.844401e+002	2517	62	1.371430e+001	0	0	0	0	0	0	2506.27	1	1	57.5363	61.3256
DATA	1163	14	58	0	0	A_44_P1017458	NM_199402	11347.6	279.427	1.421990e+002	1.485494e+001	206	64	1.219040e+001	0	0	0	0	0	0	124.78	1	1	57.5363	62.9655
DATA	1164	14	59	0	0	A_44_P407750	NM_001127680	11372.2	279.441	1.499459e+003	1.500080e+002	1337	67	1.069197e+001	0	0	0	0	0	0	1310.32	1	1	46.8651	66.5806
DATA	1165	14	60	0	0	A_64_P033872	NM_001037353	11398.5	279.5	3.981093e+001	5.885006e+000	112.5	66	1.341347e+001	0	0	0	0	0	0	34.6347	1	1	57.5363	65.8913
DATA	1166	14	61	0	0	A_42_P472699	NM_001108061	11423.7	279.5	5.857501e+001	7.297659e+000	137	67	1.194978e+001	0	0	0	0	0	0	50.7417	1	1	57.5363	65.1212
DATA	1167	14	62	0	0	A_44_P201215	ENSRNOT00000014231	11449.3	279.5	3.791256e+001	5.786628e+000	111.5	59.5	1.283025e+001	0	0	0	0	0	0	32.6996	1	1	65	58.1538
DATA	1168	14	63	0	0	A_64_P129910	NM_001107648	11474.1	280.074	6.150009e+002	6.165654e+001	625.5	62.5	1.124507e+001	0	0	0	0	0	0	528.279	1	1	46.8651	62.5
DATA	1169	14	64	0	0	A_64_P027927	NM_022255	11500.1	279.5	9.836530e+001	1.077961e+001	163	69.5	1.204378e+001	0	0	0	0	0	0	84.1145	1	1	56.9804	69.0882
DATA	1170	14	65	0	0	A_64_P101623	A_64_P101623	11524.6	279.594	3.664148e+004	3.664151e+003	31095	61.5	1.578669e+001	0	0	0	0	0	0	31205.1	1	1	47.5395	65.2333
DATA	1171	14	66	0	0	A_42_P645110	NM_001029919	11550.3	279.662	2.752472e+004	2.752476e+003	23013.5	66.5	1.814065e+001	0	0	0	0	0	0	23341.2	1	1	48.5334	71.25
DATA	1172	14	67	0	0	A_64_P017781	NM_001010956	11575.4	279.638	1.799150e+002	1.853723e+001	235.5	62	1.152570e+001	0	0	0	0	0	0	151.939	1	1	47.5395	62.6939
DATA	1173	14	68	0	0	A_64_P057106	NM_001004087	11601.5	279.5	1.800520e+002	1.855514e+001	231.5	67	1.289824e+001	0	0	0	0	0	0	151.405	1	1	57.5363	65.3103
DATA	1174	14	69	0	0	A_44_P187005	NM_022238	11626.1	279.743	1.021219e+002	1.116029e+001	167	59	1.240425e+001	0	0	0	0	0	0	85.5406	1	1	46.5243	61.2059
DATA	1175	14	70	0	0	A_42_P779933	NM_017117	11652.1	279.506	3.836275e+001	5.928643e+000	115	62	1.513976e+001	0	0	0	0	0	0	32.0009	1	1	50.4627	64.2927
DATA	1176	14	71	0	0	A_42_P555701	NM_001107554	11677.3	279.9	9.766262e+003	9.766368e+002	8067.5	68	1.673605e+001	0	0	0	0	0	0	8115.69	1	1	47.2035	67
DATA	1177	14	72	0	0	A_42_P705302	NM_001107361	11702.3	280.029	6.473729e+003	6.473890e+002	5149	73	1.357269e+001	0	0	0	0	0	0	5359.51	1	1	46.1809	71.697
DATA	1178	14	73	0	0	A_64_P015435	A_64_P015435	11727.9	280.085	3.754597e+004	3.754599e+003	30732	66.5	9.071710e+000	0	0	0	0	0	0	30967.3	1	1	44.0646	66.1
DATA	1179	14	74	0	0	A_64_P036217	NM_001000569	11754	279.545	7.828797e+001	9.074767e+000	144	72	1.824688e+001	0	0	0	0	0	0	64.3218	1	1	55.8519	77.5556
DATA	1180	14	75	0	0	A_44_P543511	NM_001024749	11778.7	280.066	1.714921e+003	1.715539e+002	1520	70	1.653923e+001	0	0	0	0	0	0	1404.35	1	1	44.0646	73.8846
DATA	1181	14	76	0	0	A_42_P759043	NM_001134509	11803.9	280.077	6.921878e+002	6.937278e+001	622	75	2.322152e+001	0	0	0	0	1	0	564.932	1	1	46.1809	80.1034
DATA	1182	14	77	0	0	A_42_P679982	NM_001107835	11829.6	280.188	3.974875e+003	3.975146e+002	3187	62	1.145319e+001	0	0	0	0	0	0	3233.54	1	1	46.8651	64.8649
DATA	1183	14	78	0	0	A_43_P18064	NM_001106904	11855.5	279.5	2.600942e+001	5.328337e+000	102	69.5	9.969597e+000	0	0	0	0	0	0	21.0885	1	1	57.5363	69.0833
DATA	1184	14	79	0	0	A_64_P092143	NM_001129879	11880.2	279.884	3.687261e+003	3.687556e+002	2994.5	68.5	1.406034e+001	0	0	0	0	0	0	2981.36	1	1	46.5243	68.7143
DATA	1185	14	80	0	0	A_64_P102886	A_64_P102886	11906.4	279.573	1.215480e+001	4.832360e+000	92	61	1.279757e+001	0	0	0	0	0	0	9.79911	1	0	65	62.7778
DATA	1186	14	81	66	1	DarkCorner	DarkCorner	11931.6	279.573	5.964432e+000	4.726785e+000	84.5	64	9.785949e+000	0	0	0	0	0	0	4.79617	1	0	57.5363	64.6591
DATA	1187	14	82	66	1	DarkCorner	DarkCorner	11957.1	279.5	4.716252e+000	4.700386e+000	79	57	1.172670e+001	0	0	0	0	0	0	-1.97866	0	0	65	59.6538
DATA	1188	14	83	66	1	DarkCorner	DarkCorner	11982.5	279.5	4.726602e+000	4.710701e+000	79	59	1.487011e+001	0	0	0	0	0	0	-1.84923	0	0	57.5363	60.8649
DATA	1189	14	84	66	1	DarkCorner	DarkCorner	12007.8	279.386	4.736063e+000	4.720131e+000	77	59.5	1.170661e+001	0	0	0	0	0	0	-3.00118	0	0	51.4001	60.7
DATA	1190	14	85	66	1	DarkCorner	DarkCorner	12033.4	279.606	4.744184e+000	4.728224e+000	78	51	9.722458e+000	0	0	0	0	0	0	-4.39526	0	0	54.4085	51.4194
DATA	1191	15	1	66	1	DarkCorner	DarkCorner	9887.27	286.02	4.128075e+000	4.114187e+000	80.5	54	1.096737e+001	0	0	0	0	0	0	-2.71001	0	0	39.8942	54.3962
DATA	1192	15	2	66	1	DarkCorner	DarkCorner	9913.09	286.386	4.109559e+000	4.095734e+000	74	57	9.974047e+000	0	0	0	0	0	0	-4.7168	0	0	57.259	55.9667
DATA	1193	15	3	66	1	DarkCorner	DarkCorner	9937.51	286.678	4.092921e+000	4.079152e+000	77.5	56	1.322850e+001	0	0	0	0	0	0	-3.55125	0	0	42.2201	58.2
DATA	1194	15	4	66	1	DarkCorner	DarkCorner	9963.58	286.427	4.076397e+000	4.062684e+000	75	60	1.171254e+001	0	0	0	0	0	0	-6.15214	0	0	57.5363	59.2941
DATA	1195	15	5	66	1	DarkCorner	DarkCorner	9989.42	286.427	4.060781e+000	4.047120e+000	75	63	1.236096e+001	0	0	0	0	0	0	-6.25696	0	0	57.5363	63.8286
DATA	1196	15	6	0	0	A_44_P451392	NM_001108023	10014.1	286.507	3.463898e+002	3.487297e+001	397	51.5	1.206865e+001	0	0	0	0	0	0	323.845	1	1	47.8731	54.6563
DATA	1197	15	7	0	0	A_64_P012661	ENSRNOT00000010298	10039.3	286.634	1.552441e+003	1.552962e+002	1535	57.5	9.237032e+000	0	0	0	0	0	0	1456.3	1	1	47.8731	58.2857
DATA	1198	15	8	0	0	A_42_P546058	NM_053670	10064.6	286.753	3.215720e+003	3.215970e+002	3022	54	1.018846e+001	0	0	0	0	0	0	3026.19	1	1	48.5334	57.2059
DATA	1199	15	9	0	0	A_42_P695401	NM_031530	10090.6	286.427	5.840760e+001	7.076183e+000	136	54	1.081080e+001	0	0	0	1	0	0	55.1299	1	1	57.5363	54.96
DATA	1200	15	10	0	0	A_44_P192193	A_44_P192193	10115.4	286.466	1.447068e+002	1.500906e+001	222.5	52	1.226172e+001	0	0	0	0	0	0	136.958	1	1	49.1849	53.7241
DATA	1201	15	11	0	0	A_42_P473886	NM_001165922	10141.2	286.712	3.842856e+002	3.863343e+001	440	59	1.188688e+001	0	0	0	0	0	0	364.668	1	1	45.835	60.814
DATA	1202	15	12	0	0	A_42_P576953	NM_138882	10166.7	286.324	9.152510e+002	9.161091e+001	952	61.5	1.464141e+001	0	0	0	0	0	0	870.541	1	1	48.2044	59.4118
DATA	1203	15	13	0	0	A_44_P260227	ENSRNOT00000036745	10192.4	286.427	5.540401e+001	6.807484e+000	137	55	1.390456e+001	0	0	0	0	0	0	52.8139	1	1	57.5363	57.2353
DATA	1204	15	14	0	0	A_44_P276435	NM_053853	10217.3	286.875	2.218833e+002	2.253677e+001	296	58	1.462096e+001	0	0	0	0	0	0	211.93	1	1	47.8731	58.9286
DATA	1205	15	15	0	0	A_43_P19066	NM_001017494	10243.3	286.5	1.404811e+002	1.459037e+001	218	57	1.177785e+001	0	0	0	0	0	0	134.414	1	1	65	57.4
DATA	1206	15	16	0	0	A_64_P113200	ENSRNOT00000061930	10268.6	286.427	1.667348e+001	4.273407e+000	95	57	1.355627e+001	0	0	0	0	0	0	15.9779	1	0	65	60.1053
DATA	1207	15	17	0	0	A_42_P480108	NM_001007637	10293.2	286.224	1.429429e+003	1.429969e+002	1433	60	1.044976e+001	0	0	0	0	0	0	1371.56	1	1	46.1809	59.9512
DATA	1209	15	19	0	0	A_44_P420046	NM_021669	10344.1	286.403	6.318474e+001	7.436328e+000	143	58	9.660365e+000	0	0	0	0	0	0	60.7573	1	1	48.2044	56.4138
DATA	1210	15	20	0	0	A_64_P077021	A_64_P077021	10370.1	286.5	2.481769e+001	4.637946e+000	105	54.5	1.031582e+001	0	0	0	0	0	0	23.8833	1	1	56.9804	55.5526
DATA	1211	15	21	0	0	A_44_P292558	NM_213559	10394.6	286.87	3.373602e+002	3.396251e+001	410	60.5	1.102408e+001	0	0	0	0	0	0	324.854	1	1	46.8651	61.5
DATA	1212	15	22	0	0	A_42_P471653	NM_001031654	10420.1	286.929	4.281328e+001	5.800921e+000	124.5	66	1.664089e+001	0	0	0	0	0	0	41.2422	1	1	46.8651	67.1111
DATA	1213	15	23	0	0	A_43_P12000	NM_019272	10445.8	286.908	4.221560e+002	4.239661e+001	484.5	61	9.005882e+000	0	0	0	0	0	0	406.74	1	1	49.1849	61.0345
DATA	1214	15	24	0	0	A_64_P131395	NM_001037523	10471.6	286.427	3.927004e+000	3.916124e+000	84	64	1.191177e+001	0	0	0	0	0	0	1.3015	0	0	65	67.5588
DATA	1215	15	25	0	0	A_42_P682853	NM_017193	10496.5	286.386	6.530366e+002	6.542088e+001	691	66	1.476569e+001	0	0	0	0	0	0	629.012	1	1	47.5395	62.4444
DATA	1216	15	26	0	0	A_42_P647505	TC640289	10521.9	286.5	3.563866e+003	3.564081e+002	3371	70	1.415328e+001	0	0	0	0	0	0	3431.51	1	1	47.8731	66.6207
DATA	1217	15	27	0	0	A_44_P682959	NM_001025139	10547.7	286.5	8.324723e+000	4.005698e+000	91	61	1.298155e+001	0	0	0	0	0	0	8.01096	1	0	57.5363	62.5789
DATA	1218	15	28	0	0	A_64_P249426	NM_001014271	10573.3	286.5	9.654784e+000	4.038318e+000	91	68	1.062596e+001	0	0	0	0	0	0	9.28386	1	0	57.5363	66.8158
DATA	1219	15	29	0	0	A_64_P133430	NM_001044282	10597.7	286.662	2.105143e+004	2.105147e+003	19775.5	61	7.885294e+000	0	0	0	0	0	0	20225.2	1	1	48.5334	61.2174
DATA	1220	15	30	0	0	A_42_P635611	NM_001025685	10624.1	286.5	3.942443e+000	3.932074e+000	83	56.5	1.064423e+001	0	0	0	0	0	0	1.44745	0	0	65	57.1591
DATA	1221	15	31	0	0	A_42_P592013	NM_001127600	10648.4	287.265	2.390675e+003	2.390999e+002	2259	56.5	1.392432e+001	0	0	0	0	0	0	2291.66	1	1	46.5243	59.1471
DATA	1222	15	32	0	1	ETG02_36680	ETG02_36680	10674.7	286.5	3.953135e+000	3.939836e+000	79	56	8.576244e+000	0	0	0	0	0	0	-4.56514	0	0	65	56.9744
DATA	1223	15	33	0	0	A_42_P608478	NM_001025131	10700.3	286.5	5.776791e+000	3.988317e+000	89	57.5	8.372845e+000	0	0	0	0	0	0	5.51959	1	0	57.5363	59.4286
DATA	1224	15	34	0	0	A_44_P137397	NM_017236	10725.2	286.778	1.075221e+005	1.075221e+004	102596	61	1.201210e+001	0	0	0	0	0	0	102561	1	1	51.0895	59.9048
DATA	1226	15	36	0	0	A_64_P110789	A_64_P110789	10776.5	286.5	1.372759e+002	1.428990e+001	205.5	48.5	9.480885e+000	0	0	0	0	1	0	130.406	1	1	57.5363	48.1
DATA	1227	15	37	0	0	A_64_P061562	A_64_P061562	10800.8	286.763	1.651588e+003	1.652067e+002	1560	50	1.286205e+001	0	0	0	0	0	0	1565.65	1	1	49.1849	54.0323
DATA	1228	15	38	0	0	A_44_P511359	NM_001108736	10827.3	286.5	4.640309e+002	4.657411e+001	517.5	53	1.060527e+001	0	0	0	0	0	0	438.77	1	1	65	52.2
DATA	1229	15	39	0	0	A_42_P658220	NM_001109598	10851.7	286.9	2.411676e+003	2.412007e+002	2307.5	56	1.234031e+001	0	0	0	0	0	0	2275.02	1	1	47.2035	54.6364
DATA	1230	15	40	0	0	A_42_P479096	NM_001008293	10877.1	287.328	1.226664e+003	1.227318e+002	1214	66	1.601445e+001	0	0	0	0	0	0	1154.17	1	1	45.1352	69.8085
DATA	1231	15	41	0	0	A_64_P275280	NM_001109569	10902.5	286.573	8.400943e+003	8.401039e+002	7660	75	3.151597e+001	0	0	0	0	1	0	7881.25	1	1	49.1849	87.1795
DATA	1232	15	42	0	0	A_42_P785926	NM_001108289	10928	286.757	1.217188e+003	1.217855e+002	1142	72	2.244880e+001	0	0	0	0	0	0	1138.58	1	1	48.5334	77.5
DATA	1233	15	43	0	0	A_64_P005238	A_64_P005238	10954.3	286.5	4.455614e+001	6.017104e+000	120	59	1.739429e+001	0	0	0	0	0	0	41.5446	1	1	57.5363	64.8065
DATA	1234	15	44	0	0	A_42_P555753	NM_001106401	10978.7	286.9	4.298035e+003	4.298227e+002	3887.5	125	5.927081e+001	0	0	0	0	1	0	3995.63	1	1	47.2035	129.333
DATA	1235	15	45	0	0	A_42_P469751	XM_001054007	11004	286.822	4.273631e+003	4.273825e+002	3867	105	4.958761e+001	0	0	0	0	1	0	3959.88	1	1	46.8651	102.912
DATA	1236	15	46	0	0	A_44_P506124	XM_222590	11029.8	287.09	4.651888e+003	4.652067e+002	4395.5	64	1.463900e+001	0	0	0	0	0	0	4295.71	1	1	46.1809	62.2432
DATA	1237	15	47	0	0	A_44_P441947	XM_001079870	11055	287.172	1.369411e+003	1.370024e+002	1325	56	1.270342e+001	0	0	0	0	0	0	1260.19	1	1	45.4864	59.6552
DATA	1238	15	48	0	0	A_64_P127659	NM_001106228	11081.1	286.5	5.088485e+003	5.088651e+002	4849	65	1.404632e+001	0	0	0	0	0	0	4664.74	1	1	56.9804	65.2286
DATA	1239	15	49	0	0	A_42_P733076	NM_001033867	11105.6	286.958	3.286767e+002	3.312580e+001	382	58	1.068704e+001	0	0	0	0	0	0	300.261	1	1	48.2044	61.7097
DATA	1240	15	50	0	0	A_64_P145939	NM_001109499	11131.5	286.608	6.040598e+001	7.325210e+000	134	63	1.120339e+001	0	0	0	0	0	0	54.967	1	1	49.1849	63.3143
DATA	1241	15	51	0	0	A_44_P1040796	NM_001106660	11157.1	287.117	1.368477e+004	1.368483e+003	12169.5	64	1.307223e+001	0	0	0	0	0	0	12405.6	1	1	44.4243	65.037
DATA	1242	15	52	0	0	A_42_P588072	NM_001106829	11182.6	286.573	4.176573e+001	5.906377e+000	121.5	67	1.225432e+001	0	0	0	0	0	0	37.708	1	1	65	69.3438
DATA	1243	15	53	0	0	A_64_P045823	ENSRNOT00000023172	11208	286.545	2.159141e+002	2.199480e+001	278	57	1.213136e+001	0	0	0	0	0	0	194.156	1	1	65	58.6452
DATA	1244	15	54	0	0	A_42_P591344	NM_001037780	11233.4	286.573	4.862199e+002	4.880393e+001	507	59	1.399968e+001	0	0	0	0	0	0	435.448	1	1	57.5363	60.1892
DATA	1245	15	55	0	0	A_64_P120322	A_64_P120322	11258.6	286.573	1.687993e+001	4.551980e+000	98.5	60.5	7.497692e+000	0	0	0	0	0	0	15.0557	1	0	57.5363	61.8462
DATA	1246	15	56	0	0	A_64_P062665	NM_001170470	11283.3	287.254	6.686865e+002	6.700319e+001	653	63	1.190163e+001	0	0	0	0	0	0	594.088	1	1	45.835	61.4146
DATA	1247	15	57	0	0	A_44_P398300	NM_001005538	11308.9	286.932	2.516570e+003	2.516931e+002	2184	62	1.339917e+001	0	0	0	0	0	0	2226.19	1	1	46.8651	63.3659
DATA	1248	15	58	0	0	A_64_P001545	ENSRNOT00000029141	11335	286.545	5.040590e+004	5.040592e+003	43646.5	61.5	1.289990e+001	0	0	0	0	0	0	44392.2	1	1	55.8519	61.3235
DATA	1249	15	59	0	0	A_44_P1010653	NM_001109021	11360.1	287.169	5.526557e+003	5.526724e+002	4817	60.5	1.179563e+001	0	0	0	0	0	0	4847.36	1	1	45.835	61.3667
DATA	1250	15	60	0	0	A_44_P398969	NM_001013225	11384.7	287.167	8.096717e+002	8.108216e+001	746	65	1.565407e+001	0	0	0	0	0	0	707.218	1	1	45.835	66.0513
DATA	1251	15	61	0	0	A_64_P059495	NM_001109986	11410.8	287.265	4.013102e+003	4.013336e+002	3419	70	1.607996e+001	0	0	0	0	0	0	3489.91	1	1	46.1809	70
DATA	1252	15	62	0	0	A_64_P037040	A_64_P037040	11436.5	286.648	3.045064e+002	3.076053e+001	343	60.5	1.145381e+001	0	0	0	0	0	0	263.622	1	1	57.5363	60.1944
DATA	1253	15	63	0	0	A_64_P051446	NM_001142942	11461.3	287.284	7.232535e+003	7.232667e+002	6047.5	60	9.304658e+000	0	0	0	0	0	0	6236.09	1	1	46.1809	60.08
DATA	1254	15	64	0	0	A_42_P701756	NM_001107646	11486.7	287.167	3.244072e+003	3.244369e+002	2748	70.5	1.084801e+001	0	0	0	0	0	0	2785.08	1	1	45.835	67.9
DATA	1255	15	65	0	0	A_44_P172604	NM_031795	11512.6	286.573	2.033546e+003	2.034025e+002	1770	66	1.177879e+001	0	0	0	0	0	0	1738.03	1	1	57.5363	65.8387
DATA	1256	15	66	0	0	A_64_P152000	A_64_P152000	11538.4	286.596	6.587522e+000	4.479375e+000	89	65.5	1.557861e+001	0	0	0	0	0	0	5.60607	1	0	57.8122	69.2143
DATA	1257	15	67	0	0	A_44_P339008	NM_001024975	11562.8	287.185	1.473641e+003	1.474312e+002	1322	65	1.635404e+001	0	0	0	0	0	0	1249.2	1	1	45.4864	67.7273
DATA	1258	15	68	0	0	A_44_P560070	A_44_P560070	11589.6	286.533	1.915517e+001	4.861523e+000	96	63	1.219753e+001	0	0	0	0	0	0	16.1642	1	0	39.0882	63.6444
DATA	1259	15	69	0	0	A_44_P520509	NM_001033868	11613.7	287.357	6.736608e+003	6.736757e+002	5724	63	1.372730e+001	0	0	0	0	0	0	5663.75	1	1	46.8651	62.4348
DATA	1260	15	70	0	0	A_42_P643349	NM_001109495	11639.6	286.573	6.168482e+001	7.637845e+000	134	64	1.344000e+001	0	0	0	0	0	0	51.6393	1	1	57.5363	62.7568
DATA	1261	15	71	0	0	A_44_P215075	NM_012667	11665.1	286.614	1.906748e+002	1.959635e+001	244	59	1.345127e+001	0	0	0	0	0	0	158.991	1	1	65	61.5641
DATA	1262	15	72	0	0	A_44_P560363	ENSRNOT00000049736	11690.5	286.648	1.403565e+003	1.404299e+002	1249	67	1.596297e+001	0	0	0	0	0	0	1165.82	1	1	57.5363	69.1765
DATA	1263	15	73	0	0	A_44_P553158	NM_001014014	11715.6	286.596	1.693621e+003	1.694233e+002	1425.5	63	1.156933e+001	0	0	0	0	0	0	1401.47	1	1	57.8122	66.129
DATA	1264	15	74	0	0	A_64_P165277	NM_001106370	11741.8	286.892	1.440699e+001	4.795138e+000	92	68	1.193865e+001	0	0	0	0	0	0	11.8774	1	0	45.835	68.9565
DATA	1265	15	75	0	0	A_64_P138187	A_64_P138187	11766.1	287.031	9.086417e+002	9.097998e+001	829.5	67	1.234637e+001	0	0	0	0	0	0	746.58	1	1	45.835	70.1053
DATA	1266	15	76	0	0	A_44_P429041	XM_227654	11791.7	287.176	3.796807e+002	3.824630e+001	395	73.5	2.175192e+001	0	0	0	0	0	0	310.889	1	1	46.1809	77.8846
DATA	1267	15	77	0	0	A_44_P465880	NM_199389	11816.7	287.25	3.008844e+003	3.009199e+002	2464.5	65	9.411507e+000	0	0	0	0	0	0	2455.71	1	1	47.5395	66.8
DATA	1268	15	78	0	0	A_44_P381740	NM_001000239	11843.4	287.183	1.937145e+001	5.023874e+000	97	64	1.182551e+001	0	0	0	0	0	0	15.7573	1	0	49.8279	66.9697
DATA	1269	15	79	0	0	A_64_P045211	NM_001191733	11868.5	287	3.499003e+001	5.818937e+000	108	70	9.843730e+000	0	0	0	0	0	0	28.3761	1	1	54.1152	70.5517
DATA	1270	15	80	0	0	A_64_P010896	A_64_P010896	11893.1	287.338	1.360643e+001	4.856404e+000	94	62	1.512266e+001	0	0	0	0	0	0	11.0049	1	0	48.2044	65.8222
DATA	1271	15	81	0	0	A_42_P566906	NM_001006966	11918.4	286.986	5.012019e+003	5.012237e+002	4108	60	8.769489e+000	0	0	0	0	0	0	4042.57	1	1	48.2044	60.7586
DATA	1272	15	82	66	1	DarkCorner	DarkCorner	11944.5	287	4.702605e+000	4.686786e+000	78	61	1.187648e+001	0	0	0	0	0	0	-3.00374	0	0	54.1152	61.1364
DATA	1273	15	83	66	1	DarkCorner	DarkCorner	11969.5	287	4.713264e+000	4.697408e+000	76	58	1.599597e+001	0	0	0	0	0	0	-5.51148	0	0	54.1152	62.25
DATA	1274	15	84	66	1	DarkCorner	DarkCorner	11995.5	287	4.723366e+000	4.707476e+000	81	59	1.265240e+001	0	0	0	0	0	0	-0.300083	0	0	54.1152	60.3947
DATA	1275	15	85	66	1	DarkCorner	DarkCorner	12020	287.175	4.731722e+000	4.715805e+000	77	56.5	1.289000e+001	0	0	0	0	0	0	-7.02022	0	0	65	56.8182
DATA	1276	16	1	66	1	DarkCorner	DarkCorner	9900.42	293.573	4.113975e+000	4.100136e+000	77	59	1.085588e+001	0	0	0	0	0	0	-2.48166	0	0	57.5363	56.6923
DATA	1277	16	2	66	1	DarkCorner	DarkCorner	9925.58	293.573	4.096644e+000	4.082863e+000	75	57.5	1.357792e+001	0	0	0	0	0	0	-5.91018	0	0	57.5363	57.7143
DATA	1278	16	3	66	1	DarkCorner	DarkCorner	9951.33	293.5	4.079842e+000	4.066117e+000	71	59.5	1.227528e+001	0	0	0	0	0	0	-11.01	0	0	57.5363	57.3571
DATA	1279	16	4	66	1	DarkCorner	DarkCorner	9976.5	293.5	4.064244e+000	4.050572e+000	74	60.5	1.224651e+001	0	0	0	0	0	0	-6.79861	0	0	65	62.65
DATA	1280	16	5	0	0	A_42_P708614	NM_001130505	10001.9	293.5	4.825123e+004	4.825125e+003	44684	54.5	1.002345e+001	0	0	0	0	0	0	45080.7	1	1	56.9804	55.3929
DATA	1281	16	6	0	0	A_44_P427177	NM_053923	10027.4	293.573	7.182767e+000	4.085301e+000	88	54.5	8.736705e+000	0	0	0	0	0	0	6.73429	1	0	57.5363	53.3158
DATA	1282	16	7	0	0	A_44_P417051	NM_001024886	10052.6	293.573	3.891143e+001	5.586624e+000	118	60.5	1.089651e+001	0	0	0	0	0	0	36.6002	1	1	65	60.4231
DATA	1283	16	8	0	0	A_64_P052917	ENSRNOT00000029053	10078.1	293.5	3.037774e+001	5.019862e+000	112	54	7.668919e+000	0	0	0	0	0	0	28.6613	1	1	56.9804	55.4865
DATA	1284	16	9	0	0	A_42_P689013	NM_053800	10102.6	293.873	1.953952e+004	1.953956e+003	18078	53	1.180671e+001	0	0	0	0	0	0	18487.6	1	1	47.5395	54.0385
DATA	1285	16	10	0	0	A_42_P668072	NM_013130	10128.2	293.694	1.948718e+002	1.988836e+001	264	56	8.299742e+000	0	0	0	0	0	0	184.872	1	1	47.8731	55.1667
DATA	1286	16	11	0	0	A_44_P762596	XM_237156	10154.3	293.984	2.565598e+002	2.596045e+001	321	61.5	1.486729e+001	0	0	0	0	0	0	244.022	1	1	45.4864	61.1316
DATA	1287	16	12	0	0	A_44_P673662	TC577636	10179.1	294.188	5.255289e+001	6.577482e+000	135.5	53.5	1.537786e+001	0	0	0	0	0	0	50.097	1	1	45.4864	56.75
DATA	1288	16	13	0	0	A_42_P674598	NM_013067	10204.4	294.265	3.640722e+004	3.640724e+003	33194	56	1.239002e+001	0	0	0	0	0	0	34777.5	1	1	46.5243	57.9333
DATA	1289	16	14	0	0	A_44_P529994	NM_001191720	10230.4	293.573	6.653793e+000	3.995908e+000	86.5	58	1.041907e+001	0	0	0	0	0	0	6.36745	1	0	57.5363	59.0968
DATA	1290	16	15	0	0	A_42_P655644	NM_133618	10255.1	294.328	1.444442e+003	1.444977e+002	1418.5	55	1.113538e+001	0	0	0	0	0	0	1384.67	1	1	45.1352	57.0571
DATA	1291	16	16	0	0	A_42_P589674	NM_001044225	10280.4	294.29	6.091562e+003	6.091689e+002	5922	60	1.210072e+001	0	0	0	0	0	0	5847.98	1	1	46.8651	62.2895
DATA	1292	16	17	0	0	A_64_P010139	A_64_P010139	10305.9	294.403	1.867465e+002	1.908217e+001	258.5	60	1.039931e+001	0	0	0	0	0	0	179.51	1	1	44.0646	60.5135
DATA	1293	16	18	0	0	A_42_P586883	NM_001106416	10332	293.545	5.879961e+001	7.066167e+000	140	60	1.013553e+001	0	0	0	0	0	0	56.5758	1	1	65	60.0645
DATA	1294	16	19	0	0	A_42_P461144	DV724416	10356.9	294.222	1.667538e+003	1.667997e+002	1633	59	9.928657e+000	0	0	0	0	0	0	1606	1	1	45.4864	57.5526
DATA	1295	16	20	0	0	A_64_P130565	NM_031668	10382.2	293.918	3.114485e+002	3.138965e+001	375	59	1.169858e+001	0	0	0	0	0	0	300.142	1	1	44.7812	60.76
DATA	1296	16	21	0	0	A_64_P002826	NM_001134527	10407.7	294.299	1.228061e+002	1.288818e+001	201	66	1.306606e+001	0	0	0	0	0	0	118.412	1	1	46.1809	65.3171
DATA	1298	16	23	0	0	A_64_P036099	A_64_P036099	10458.3	294.384	2.362931e+003	2.363254e+002	2359	64	1.202870e+001	0	0	0	0	0	0	2279.28	1	1	47.5395	65.7586
DATA	1299	16	24	0	0	A_64_P080580	ENSRNOT00000040473	10483.8	294.27	9.509979e+002	9.518010e+001	984	66	1.010811e+001	0	0	0	0	0	0	917.232	1	1	45.1352	65.913
DATA	1300	16	25	0	0	A_43_P12276	NM_022636	10509.3	293.68	4.474987e+001	5.943059e+000	125	67.5	1.109617e+001	0	0	0	0	0	0	43.145	1	1	39.8942	64.8125
DATA	1301	16	26	0	0	A_42_P505393	NM_199085	10534.6	294.224	5.613996e+002	5.627612e+001	615.5	72	1.820250e+001	0	0	0	0	0	0	541.062	1	1	46.5243	70.2581
DATA	1302	16	27	0	0	A_44_P883619	ENSRNOT00000032374	10560.5	293.648	3.928437e+000	3.915222e+000	77	63	1.596934e+001	0	0	0	0	0	0	-2.90906	0	0	65	66.425
DATA	1303	16	28	0	0	A_44_P493894	ENSRNOT00000050156	10585.9	293.614	1.809933e+005	1.809933e+004	173463	66	1.682445e+001	0	0	0	0	0	0	174161	1	1	57.259	69.3929
DATA	1304	16	29	0	0	A_64_P085334	TC585414	10610.4	294.29	1.106369e+004	1.106376e+003	9986	60	1.153172e+001	0	0	0	0	0	0	10636.9	1	1	46.8651	59.7297
DATA	1306	16	31	0	0	A_64_P045433	A_64_P045433	10661.7	294.356	5.052739e+003	5.052892e+002	4838	56	1.264100e+001	0	0	0	0	0	0	4845.55	1	1	47.5395	59.8889
DATA	1307	16	32	0	0	A_64_P025351	AY724474	10686.5	294.257	4.412573e+004	4.412575e+003	41756	57	7.953761e+000	0	0	0	0	0	0	42253.2	1	1	47.2035	58.0652
DATA	1308	16	33	0	0	A_44_P501626	ENSRNOT00000050744	10712.9	293.614	6.264890e+000	3.994396e+000	91	61	1.023274e+001	0	0	0	0	0	0	5.98793	1	0	57.259	63.2143
DATA	1309	16	34	0	0	A_64_P071525	NM_001000141	10738.4	293.573	3.965635e+000	3.952294e+000	80	61	1.248165e+001	0	0	0	0	0	0	-0.87367	0	0	57.5363	59.6667
DATA	1310	16	35	0	0	A_64_P006545	A_64_P006545	10762.8	294.369	1.909348e+004	1.909352e+003	18752	50.5	1.050648e+001	0	0	0	0	0	0	18183	1	1	45.4864	49.5313
DATA	1311	16	36	0	0	A_64_P089561	NM_001044265	10789.1	293.935	6.255077e+001	7.407742e+000	142	51	9.627581e+000	0	0	0	0	0	0	59.4315	1	1	54.4085	52.9032
DATA	1312	16	37	0	0	A_44_P791108	NM_001014070	10814.5	294	9.463049e+001	1.020786e+001	145.5	55.5	1.413296e+001	0	0	0	0	0	0	89.7058	1	1	54.1152	56.5625
DATA	1313	16	38	0	0	A_44_P161535	A_44_P161535	10839.4	294.072	6.091515e+003	6.091645e+002	5105.5	48.5	9.630639e+000	0	1	0	0	0	0	5760.77	1	1	46.5243	49.2222
DATA	1314	16	39	0	0	A_44_P299136	NM_001108539	10865.5	294	4.119119e+002	4.138473e+001	446.5	57	1.163936e+001	0	0	0	0	0	0	388.506	1	1	54.1152	57.4063
DATA	1315	16	40	1028	1	(+)E1A_r60_a97	E1A_r60_a97	10890.5	294	6.089587e+000	4.054446e+000	88	64	1.306344e+001	0	0	0	0	0	0	5.72818	1	0	54.1152	66.8182
DATA	1316	16	41	0	0	A_44_P161723	NM_001134526	10916	294	2.132146e+002	2.169711e+001	277	68	2.600322e+001	0	0	0	0	0	0	199.986	1	1	54.9904	76.2051
DATA	1317	16	42	0	0	A_64_P121443	A_64_P121443	10940.7	294.764	4.044700e+000	4.035210e+000	83	67.5	1.902361e+001	0	0	0	0	0	0	1.70455	0	0	41.4593	70.6842
DATA	1318	16	43	0	0	A_42_P771373	NM_012614	10965.8	293.897	1.514374e+004	1.514379e+003	13259.5	110	6.700554e+001	0	0	0	0	1	0	14119.4	1	1	46.5243	122.833
DATA	1319	16	44	0	0	A_44_P1025944	NM_147140	10991.4	294	1.446297e+004	1.446303e+003	13150	87.5	5.591147e+001	0	0	0	0	1	0	13441.4	1	1	48.5334	111.313
DATA	1320	16	45	0	0	A_64_P014085	NM_001007678	11016.7	294.135	1.138204e+003	1.138932e+002	1116.5	64	1.590335e+001	0	0	0	0	0	0	1054.32	1	1	48.5334	63.6667
DATA	1321	16	46	0	0	A_64_P095298	NM_001047963	11043	294	5.577271e+001	6.913358e+000	134	64	1.323377e+001	0	0	0	0	0	0	51.4776	1	1	54.9904	64.8485
DATA	1322	16	47	0	0	A_64_P122037	A_64_P122037	11067.4	294.157	2.502413e+004	2.502417e+003	22665.5	65	1.421110e+001	0	0	0	0	0	0	23019.2	1	1	47.5395	66.6923
DATA	1323	16	48	0	0	A_64_P098094	A_64_P098094	11093.1	294.243	1.027081e+005	1.027081e+004	93849	60	1.153534e+001	0	0	0	0	0	0	94133.8	1	1	47.5395	63.7241
DATA	1324	16	49	0	0	A_44_P353708	ENSRNOT00000033510	11118.6	294.076	7.420670e+001	8.492319e+000	150	58	1.151504e+001	0	0	0	0	0	0	67.7559	1	1	45.1352	60.8966
DATA	1325	16	50	0	0	A_42_P541669	ENSRNOT00000043345	11144.3	294.1	1.132014e+003	1.132773e+002	1108	61	9.859706e+000	0	0	0	0	0	0	1029.63	1	1	47.2035	61.6
DATA	1326	16	51	0	0	A_42_P560894	NM_019138	11169.3	294.024	5.264517e+003	5.264682e+002	4732	62	1.392931e+001	0	0	0	0	0	0	4770	1	1	49.8279	63.4444
DATA	1327	16	52	0	0	A_42_P498066	NM_031136	11195.5	294	9.324124e+004	9.324125e+003	84229	65	1.074163e+001	0	0	0	0	0	0	84138.3	1	1	54.1152	63.1515
DATA	1328	16	53	0	0	A_42_P538928	NM_053021	11220	294.211	3.101614e+004	3.101617e+003	26994	62	1.264614e+001	0	0	0	0	0	0	27880.9	1	1	46.8651	59.7297
DATA	1329	16	54	0	0	A_64_P302169	NM_001099493	11245.3	294.815	4.116570e+001	5.888954e+000	121	63	1.079071e+001	0	0	0	0	0	0	36.8589	1	1	44.0646	64.5
DATA	1330	16	55	0	0	A_43_P18282	NM_001173436	11271.3	294.088	5.655532e+001	7.062190e+000	130	58	9.211130e+000	0	0	0	0	0	0	50.4174	1	1	45.835	58.0588
DATA	1331	16	56	0	0	A_44_P304169	NM_001000482	11296.9	294.065	2.872196e+002	2.903433e+001	350.5	62	1.248596e+001	0	0	0	0	0	0	254.968	1	1	54.4085	61.3488
DATA	1332	16	57	0	0	A_44_P318932	XM_231081	11322.5	294	7.258435e+003	7.258560e+002	6437	66	1.307704e+001	0	0	0	0	0	0	6415.97	1	1	54.1152	63.1351
DATA	1333	16	58	0	0	A_64_P124621	A_64_P124621	11347.5	294	4.009167e+001	5.867034e+000	119.5	60.5	1.110284e+001	0	0	0	0	0	0	35.2905	1	1	54.1152	60.6111
DATA	1334	16	59	0	0	A_42_P553960	NM_001107831	11372.3	294.1	1.052028e+004	1.052037e+003	9022	67	1.259951e+001	0	0	0	0	0	0	9222.09	1	1	47.2035	66.9524
DATA	1335	16	60	0	0	A_64_P129459	A_64_P129459	11396.9	294.729	7.034604e+002	7.047848e+001	704	70	1.663258e+001	0	0	0	0	0	0	614.179	1	1	52.0157	69.9091
DATA	1336	16	61	0	0	A_64_P083224	ENSRNOT00000017383	11422.9	294.262	4.088088e+001	5.960841e+000	116.5	64	1.306406e+001	0	0	0	0	0	0	35.5325	1	1	44.7812	63.3243
DATA	1337	16	62	0	0	A_64_P031840	NM_001017445	11448.8	294.189	1.443396e+003	1.444053e+002	1249	61	9.995913e+000	0	0	0	0	0	0	1249.06	1	1	48.5334	60.5806
DATA	1338	16	63	0	0	A_43_P16427	NM_001191000	11474.5	294.352	4.160780e+001	6.038323e+000	117.5	58	8.637213e+000	0	0	0	0	0	0	35.8513	1	1	57.5363	57.9167
DATA	1339	16	64	0	0	A_64_P159034	NM_001191681	11499.5	294.386	2.173754e+004	2.173758e+003	18210.5	68	1.174911e+001	0	0	0	0	0	0	18651.6	1	1	47.5395	67.3333
DATA	1340	16	65	0	0	A_64_P009007	A_64_P009007	11525.5	294.352	5.598484e+001	7.128985e+000	126	62	1.223292e+001	0	0	0	0	0	0	47.8287	1	1	65	63.8529
DATA	1341	16	66	0	0	A_42_P489817	NM_001107681	11550.2	294.3	3.849678e+003	3.849933e+002	3266.5	65	1.515014e+001	0	0	0	0	0	0	3275.37	1	1	47.2035	68.12
DATA	1342	16	67	0	0	A_42_P643272	NM_053389	11575.3	294	2.482379e+003	2.482778e+002	2083	65	1.756128e+001	0	0	0	0	0	0	2103.21	1	1	47.2035	70.4884
DATA	1343	16	68	0	0	A_64_P076063	XM_001061753	11601.5	294.352	1.127808e+002	1.213121e+001	179	60	1.260982e+001	0	0	0	0	0	0	95.1566	1	1	57.5363	62.2162
DATA	1344	16	69	0	0	A_64_P047371	NM_001109423	11627	294.455	3.221193e+003	3.221505e+002	2814	60.5	1.354558e+001	0	0	0	0	0	0	2706.83	1	1	55.8519	61.4688
DATA	1345	16	70	0	0	A_44_P991940	XM_225667	11651.6	294.507	1.313857e+002	1.388926e+001	188.5	62.5	1.373324e+001	0	0	0	0	0	0	109.981	1	1	47.2035	62.6591
DATA	1346	16	71	0	0	A_42_P667802	ENSRNOT00000014585	11677.6	294.427	1.551077e+002	1.615666e+001	208	64	1.407466e+001	0	0	0	0	0	0	129.317	1	1	57.5363	64.8966
DATA	1347	16	72	0	0	A_44_P433942	A_44_P433942	11703.4	294.427	2.985092e+001	5.433597e+000	103	66	1.319284e+001	0	0	0	0	0	0	24.7908	1	1	65	68.3636
DATA	1348	16	73	0	0	A_42_P735279	NM_001004446	11727.7	294.264	2.257358e+004	2.257363e+003	18150.5	70	1.209786e+001	0	0	0	0	0	0	18679.5	1	1	47.5395	70.475
DATA	1349	16	74	0	0	A_64_P000316	A_64_P000316	11754	294.455	8.563865e+001	9.708587e+000	147.5	73	1.318351e+001	0	0	0	0	0	0	70.6037	1	1	55.8519	74.2059
DATA	1350	16	75	0	0	A_64_P073357	XM_001070426	11779.2	294.5	9.347105e+001	1.041301e+001	164.5	68.5	2.097048e+001	0	0	0	0	0	0	76.7941	1	1	42.9674	75.75
DATA	1351	16	76	0	0	A_42_P501972	NM_001025418	11804.6	294.427	4.609843e+002	4.632786e+001	460	67	1.584427e+001	0	0	0	1	0	0	377.453	1	1	57.5363	69.8214
DATA	1352	16	77	0	0	A_64_P030824	ENSRNOT00000002002	11830.4	294.427	1.044424e+002	1.142053e+001	167	63.5	1.140175e+001	0	0	0	0	0	0	85.2356	1	1	57.5363	66
DATA	1353	16	78	0	0	A_42_P537715	NM_001025743	11854.8	294.573	2.892831e+003	2.893202e+002	2374	71	1.394811e+001	0	0	0	0	0	0	2353.92	1	1	52.6241	73.8684
DATA	1354	16	79	0	0	A_44_P596424	TC642059	11880.2	294.481	6.430416e+002	6.447190e+001	608.5	65	1.451684e+001	0	0	0	0	0	0	521.698	1	1	49.8279	67.6364
DATA	1355	16	80	0	0	A_42_P528891	XM_001074805	11906.4	294.427	3.923240e+002	3.950830e+001	413	60	1.286198e+001	0	0	0	0	0	0	317.378	1	1	57.5363	62.3415
DATA	1356	16	81	0	0	A_64_P130516	A_64_P130516	11931.2	294.667	1.012170e+002	1.114814e+001	164.5	63	1.168507e+001	0	0	0	0	0	0	81.6793	1	1	44.4243	62.7
DATA	1357	16	82	66	1	DarkCorner	DarkCorner	11957.1	294.5	4.699963e+000	4.684152e+000	74	62.5	1.419211e+001	0	0	0	0	0	0	-5.9802	0	0	56.9804	63.8889
DATA	1358	16	83	66	1	DarkCorner	DarkCorner	11982.5	294.5	4.710316e+000	4.697711e+000	83.5	60	1.598235e+001	0	0	0	0	0	0	1.40115	0	0	57.5363	62.8108
DATA	1359	16	84	66	1	DarkCorner	DarkCorner	12007.7	294.5	4.719612e+000	4.720367e+000	81	60	1.497737e+001	0	0	0	0	0	0	3.17367	0	0	65	62.5313
DATA	1360	16	85	66	1	DarkCorner	DarkCorner	12032.8	294.947	4.727389e+000	4.711485e+000	80	50	1.049846e+001	0	0	0	0	0	0	-1.3496	0	0	53.8203	51.2234
DATA	1361	17	1	66	1	DarkCorner	DarkCorner	9887.5	300.648	4.118822e+000	4.104966e+000	76	51	1.009425e+001	0	0	0	0	0	0	-5.38753	0	0	57.5363	51.4103
DATA	1362	17	2	66	1	DarkCorner	DarkCorner	9913.09	300.614	4.100832e+000	4.087036e+000	78	57.5	1.194514e+001	0	0	0	0	0	0	-3.96225	0	0	57.259	56.4474
DATA	1363	17	3	66	1	DarkCorner	DarkCorner	9938.95	300.362	4.083681e+000	4.069943e+000	76	59.5	1.267076e+001	0	0	0	0	0	0	-4.72363	0	0	43.3362	58.375
DATA	1364	17	4	66	1	DarkCorner	DarkCorner	9963.61	300.931	4.067679e+000	4.053995e+000	72	63.5	1.124168e+001	0	0	0	0	0	0	-10.4216	0	0	53.8203	63.1538
DATA	1365	17	5	0	0	A_44_P434817	NM_001012187	9989.5	301	3.598959e+003	3.599186e+002	3346.5	58.5	8.371974e+000	0	0	0	0	0	0	3360.23	1	1	54.1152	57.6429
DATA	1366	17	6	0	0	A_64_P153319	A_64_P153319	10013.7	301.333	7.797945e+002	7.808323e+001	832	55	9.963518e+000	0	0	0	0	0	0	730.578	1	1	46.8651	54.1579
DATA	1367	17	7	0	0	A_64_P034394	XM_218828	10040	301	2.407946e+001	4.678055e+000	103	56.5	1.000885e+001	0	0	0	0	0	0	22.6375	1	1	65	55.3421
DATA	1368	17	8	0	0	A_64_P001399	A_64_P001399	10064.7	301.333	1.825512e+004	1.825516e+003	17264.5	60	9.472170e+000	0	0	0	0	0	0	17215.6	1	1	46.8651	59.7436
DATA	1369	17	9	0	0	A_42_P712191	NM_001109207	10090.2	301.044	2.169544e+002	2.205865e+001	289	54	9.686464e+000	0	0	0	0	0	0	205.204	1	1	46.5243	55.5517
DATA	1370	17	10	0	0	A_44_P746633	NM_001109580	10115.4	301.127	1.481511e+004	1.481517e+003	13583	53	9.716494e+000	0	0	0	0	0	0	14051.4	1	1	47.5395	52.5556
DATA	1371	17	11	0	0	A_42_P772157	NM_017020	10141.1	301.104	1.543149e+003	1.543658e+002	1516	62	1.505291e+001	0	0	0	0	0	0	1467.4	1	1	46.8651	63.9024
DATA	1372	17	12	0	0	A_44_P407543	NM_001024996	10166.7	301.076	1.302891e+002	1.361619e+001	201.5	57.5	1.712075e+001	0	0	0	0	0	0	124.189	1	1	45.835	60
DATA	1374	17	14	0	0	A_64_P057225	NM_001008857	10217.6	301.192	1.053581e+002	1.124820e+001	179	62	1.090413e+001	0	0	0	0	0	0	100.843	1	1	48.2044	59
DATA	1375	17	15	0	0	A_42_P462015	NM_001011943	10242.4	301.185	5.893844e+002	5.906949e+001	648	58	1.135230e+001	0	0	0	0	0	0	565.097	1	1	45.4864	59.4815
DATA	1376	17	16	0	0	A_42_P596050	NM_053572	10267.9	301.348	4.734717e+002	4.750969e+001	523.5	59	1.260127e+001	0	0	0	0	0	0	454.688	1	1	46.1809	60.4762
DATA	1377	17	17	0	0	A_44_P213776	NM_052829	10293.1	301.134	1.130409e+002	1.196485e+001	189	60	1.092103e+001	0	0	0	0	0	0	108.701	1	1	46.1809	60.2857
DATA	1378	17	18	0	0	A_64_P004468	A_64_P004468	10318.8	301.194	2.811981e+003	2.812253e+002	2813	60.5	1.181712e+001	0	0	0	0	0	0	2707.24	1	1	47.5395	62.6316
DATA	1379	17	19	0	0	A_44_P290394	NM_053580	10343.8	301.194	5.653781e+003	5.653916e+002	5339.5	61	1.238807e+001	0	0	0	0	0	0	5448.41	1	1	47.5395	60.1852
DATA	1380	17	20	0	0	A_64_P076911	XM_215948	10369.7	301.136	9.946447e+001	1.068723e+001	183.5	63	1.244369e+001	0	0	0	0	0	0	95.9268	1	1	45.835	62.0857
DATA	1381	17	21	0	0	A_64_P155895	NM_001009658	10394.6	301.357	3.502597e+003	3.502814e+002	3385.5	65	1.502298e+001	0	0	0	0	0	0	3380.06	1	1	47.2035	66.3529
DATA	1382	17	22	0	0	A_43_P16338	ENSRNOT00000034555	10420.2	301.313	6.308214e+001	7.419454e+000	142	68	1.480526e+001	0	0	0	0	0	0	60.899	1	1	45.835	68.2564
DATA	1383	17	23	0	0	A_42_P716283	NM_001107983	10445.4	301.284	1.092882e+003	1.093579e+002	1121	63	7.943712e+000	0	0	0	0	0	0	1055.27	1	1	46.5243	64.7778
DATA	1384	17	24	0	0	A_43_P13355	NM_139082	10471.1	301.329	2.587884e+002	2.617179e+001	327.5	64	1.560314e+001	0	0	0	0	0	0	249.886	1	1	47.8731	66.4839
DATA	1385	17	25	0	0	A_64_P126065	NM_001005900	10496.5	301.108	1.445309e+002	1.497152e+001	221	66	7.511103e+000	0	0	0	0	0	0	139.53	1	1	48.5334	64.4
DATA	1386	17	26	0	0	A_44_P838532	NM_001107144	10522	301	1.223398e+003	1.224022e+002	1253	72	1.590032e+001	0	0	0	0	0	0	1180.62	1	1	46.8651	69.5152
DATA	1387	17	27	0	0	A_42_P785861	NM_001009422	10547.3	301.143	3.805333e+003	3.805534e+002	3691	61	1.449550e+001	0	0	0	0	0	0	3670.35	1	1	47.2035	63.8667
DATA	1388	17	28	0	0	A_42_P641962	NM_012999	10573.5	301	2.831310e+003	2.831581e+002	2740	68	1.489562e+001	0	0	0	0	0	0	2728.77	1	1	54.1152	69.7097
DATA	1389	17	29	0	0	A_64_P085201	TC633318	10598.5	301.352	1.681056e+002	1.726054e+001	241	66	1.427170e+001	0	0	0	0	0	0	161.882	1	1	57.5363	66.8077
DATA	1390	17	30	0	0	A_64_P015687	NM_053573	10623.4	301.5	5.963125e+003	5.963254e+002	5522	57	1.489034e+001	0	0	0	0	0	0	5736.43	1	1	48.5334	59
DATA	1391	17	31	0	0	A_64_P078332	NM_012794	10649.5	301.352	2.238706e+001	4.518309e+000	102	61	1.578132e+001	0	0	0	0	0	0	21.5078	1	1	57.5363	64.7179
DATA	1392	17	32	0	0	A_42_P637189	NM_031612	10673.9	301.681	6.536020e+003	6.536138e+002	5976	57.5	8.768471e+000	0	0	0	0	0	0	6271.09	1	1	47.8731	58.7813
DATA	1393	17	33	0	0	A_42_P602472	NM_001008290	10699.4	301.5	3.689861e+003	3.690071e+002	3432.5	60	9.493858e+000	0	0	0	0	0	0	3534.59	1	1	48.5334	62
DATA	1394	17	34	0	0	A_64_P003749	NM_031799	10725.5	301.352	1.072275e+002	1.142487e+001	191	64.5	8.439874e+000	0	0	0	0	0	0	102.528	1	1	57.5363	63.75
DATA	1395	17	35	0	0	A_42_P785861	NM_001009422	10750.9	301.386	3.619337e+003	3.619553e+002	3358.5	55	1.413459e+001	0	0	0	0	0	0	3454.15	1	1	57.259	56.4857
DATA	1396	17	36	0	0	A_64_P138889	NM_001013050	10775.7	301.338	4.614346e+003	4.614516e+002	4452	51	9.376692e+000	0	0	0	0	0	0	4394.87	1	1	48.5334	51.1212
DATA	1397	17	37	0	0	A_44_P409820	NM_012908	10801.6	301.427	1.794963e+002	1.838293e+001	216	49.5	9.080232e+000	0	0	0	1	0	0	170.576	1	1	57.5363	50.5313
DATA	1398	17	38	0	0	A_44_P529880	ENSRNOT00000033370	10827.4	301.427	1.184569e+002	1.249556e+001	188	46	8.609970e+000	0	0	0	0	1	0	112.3	1	1	57.5363	46.2368
DATA	1399	17	39	0	0	A_64_P084851	ENSRNOT00000029593	10853.2	301.831	1.424715e+002	1.479454e+001	213	47	1.173645e+001	0	0	0	0	0	0	134.733	1	1	45.835	50.2059
DATA	1400	17	40	0	0	A_44_P654068	NM_001114402	10877.3	301.627	6.165538e+002	6.178482e+001	647	60	1.036332e+001	0	0	0	0	0	0	581.587	1	1	49.1849	59.3143
DATA	1401	17	41	0	0	A_64_P094855	NM_001109591	10902.5	301.364	2.049661e+003	2.050053e+002	2018.5	60	1.187559e+001	0	0	0	0	0	0	1928.01	1	1	49.8279	60.3793
DATA	1402	17	42	0	0	A_42_P516658	NM_001024888	10928.2	301.606	2.221546e+002	2.257626e+001	292	66	1.734160e+001	0	0	0	0	0	0	208.364	1	1	47.5395	66.8649
DATA	1403	17	43	0	0	A_64_P092394	ENSRNOT00000064749	10954.2	301.43	3.366080e+001	5.252922e+000	113.5	75	5.993724e+001	0	0	0	0	1	0	31.4727	1	1	58.0869	107.838
DATA	1404	17	44	0	0	A_44_P280755	NM_148890	10979.5	301.352	5.709780e+001	6.997656e+000	135.5	79	5.051081e+001	0	0	0	0	1	0	53.2181	1	1	65	97.8649
DATA	1405	17	45	0	0	A_42_P629062	AF072835	11004.2	301.446	6.820001e+002	6.832064e+001	681	65	1.437030e+001	0	0	0	0	0	0	633.654	1	1	48.8603	64.375
DATA	1406	17	46	0	0	A_64_P131141	ENSRNOT00000012638	11029.5	301.895	6.706317e+001	7.845508e+000	145.5	63.5	1.666866e+001	0	0	0	0	0	0	62.1059	1	1	49.5074	67.2381
DATA	1407	17	47	0	0	A_42_P756350	NM_021772	11055.6	301.427	1.032290e+002	1.110231e+001	172	69.5	1.738109e+001	0	0	0	0	0	0	95.2489	1	1	65	70.6333
DATA	1408	17	48	66	-1	(-)3xSLv1	NegativeControl	11081	301.455	4.114937e+000	4.101094e+000	77	65	9.641217e+000	0	0	0	0	0	0	-2.58575	0	0	55.8519	65.4211
DATA	1409	17	49	0	0	A_64_P124796	A_64_P124796	11106.4	301.427	3.681475e+001	5.522355e+000	114	54.5	1.385330e+001	0	0	0	0	0	0	33.7233	1	1	57.5363	58.5
DATA	1410	17	50	0	0	A_44_P288443	NM_001108878	11131	301.5	7.096274e+002	7.108289e+001	724.5	63	1.150035e+001	0	0	0	0	0	0	647.69	1	1	47.2035	62
DATA	1411	17	51	0	0	A_42_P748004	NM_001135873	11156.8	301.493	1.537790e+003	1.538349e+002	1396	59	1.155996e+001	0	0	0	0	0	0	1398.11	1	1	49.5074	59.1515
DATA	1412	17	52	0	0	A_64_P067310	NM_001139507	11182.5	301.271	1.562732e+003	1.563287e+002	1469	58	9.132537e+000	0	0	0	0	0	0	1415.1	1	1	47.2035	57.625
DATA	1413	17	53	0	0	A_44_P210809	NM_001107334	11208	301.455	1.483167e+002	1.540956e+001	207	58	1.296724e+001	0	0	0	0	0	0	133.775	1	1	55.8519	59.2778
DATA	1414	17	54	1028	1	(+)E1A_r60_a104	E1A_r60_a104	11233.4	301.427	9.487043e+000	4.303264e+000	88	61	9.657486e+000	0	0	0	0	0	0	8.52232	1	0	57.5363	61.7273
DATA	1415	17	55	0	0	A_44_P1042711	NM_001108426	11258.7	301.5	1.906068e+002	1.952104e+001	254	61.5	1.038998e+001	0	0	0	0	0	0	170.531	1	1	57.5363	62.1389
DATA	1416	17	56	0	0	A_42_P661992	TC596141	11283.4	302.096	1.629395e+002	1.683431e+001	224	56	1.271681e+001	0	0	0	0	0	0	145.208	1	1	48.5334	59.025
DATA	1417	17	57	0	0	A_42_P565621	NM_001105971	11309.6	301.427	1.903959e+002	1.950814e+001	247	60.5	1.353133e+001	0	0	0	0	0	0	168.923	1	1	57.5363	62.5
DATA	1418	17	58	0	0	A_44_P264600	NM_001013132	11334.5	301.471	2.320799e+002	2.359707e+001	290	61	1.028275e+001	0	0	0	0	0	0	205.056	1	1	46.8651	61.2121
DATA	1419	17	59	0	0	A_64_P034901	TC591400	11360.4	301.427	1.950828e+001	4.709126e+000	97	59	1.299399e+001	0	0	0	0	0	0	17.162	1	0	65	61.7429
DATA	1420	17	60	0	0	A_42_P468216	NM_001030026	11384.9	301.735	4.764544e+003	4.764738e+002	4054	71	1.796877e+001	0	0	0	1	0	0	4174.6	1	1	45.835	72.28
DATA	1421	17	61	0	0	A_64_P062855	XM_343708	11411.3	301.5	2.535025e+001	5.011326e+000	103.5	70.5	1.349661e+001	0	0	0	0	0	0	22.1115	1	1	65	69.5
DATA	1422	17	62	0	0	A_64_P048421	AABR03055399	11436.5	301.5	1.752166e+001	4.681499e+000	93	59.5	1.135465e+001	0	0	0	0	0	0	15.2183	1	0	57.5363	57.8684
DATA	1423	17	63	0	0	A_44_P342166	NM_013187	11461.3	301.959	2.063285e+002	2.108828e+001	261	59	8.941931e+000	0	0	0	0	0	0	178.475	1	1	49.1849	60.3793
DATA	1424	17	64	0	0	A_42_P748154	XM_001059949	11486.6	302	4.002301e+003	4.002540e+002	3460	62	1.250744e+001	0	0	0	0	0	0	3447.35	1	1	47.8731	64.3103
DATA	1425	17	65	0	0	A_64_P157763	A_64_P157763	11511.8	301.519	1.537836e+003	1.538465e+002	1356.5	63	1.267247e+001	0	0	0	0	0	0	1318.89	1	1	49.8279	64.7297
DATA	1426	17	66	0	0	A_64_P155645	NM_022706	11537.5	301.853	1.041992e+004	1.042002e+003	8668.5	65	1.290939e+001	0	0	0	0	0	0	8899.07	1	1	49.8279	65.037
DATA	1427	17	67	0	0	A_42_P622436	NM_022298	11563.5	301.5	9.288664e+004	9.288666e+003	79036	68.5	1.910096e+001	0	0	0	0	0	0	78983.8	1	1	57.5363	72.5714
DATA	1428	17	68	0	0	A_44_P304190	NM_001014044	11588.3	302.121	2.105067e+002	2.151621e+001	261	64	1.299624e+001	0	0	0	0	0	0	178.302	1	1	45.835	65.0682
DATA	1429	17	69	1028	1	(+)E1A_r60_a104	E1A_r60_a104	11614.3	301.5	1.101471e+001	4.604572e+000	92	60	1.330583e+001	0	0	0	0	0	0	9.28934	1	0	57.5363	62.6129
DATA	1430	17	70	0	0	A_42_P771373	NM_012614	11638.6	301.844	1.455216e+004	1.455222e+003	11693	61.5	1.001164e+001	0	0	0	1	0	0	12226.6	1	1	49.8279	61.3438
DATA	1431	17	71	0	0	A_64_P101976	A_64_P101976	11665.1	301.5	4.112866e+001	6.101262e+000	115.5	60	1.350065e+001	0	0	0	0	0	0	34.4111	1	1	56.9804	61.2222
DATA	1432	17	72	0	0	A_42_P777935	ENSRNOT00000027369	11689.7	302.231	3.185371e+002	3.217319e+001	343.5	66	1.420853e+001	0	0	0	0	0	0	265.56	1	1	45.4864	66
DATA	1433	17	73	0	0	A_64_P041521	NM_012945	11715.7	301.5	1.517777e+002	1.584253e+001	209.5	66	1.230186e+001	0	0	0	0	0	0	126.026	1	1	65	66.5833
DATA	1434	17	74	0	0	A_44_P102661	NM_138862	11740.4	301.873	1.903741e+003	1.904287e+002	1578	71	1.233448e+001	0	0	0	0	0	0	1575.23	1	1	47.5395	71.9143
DATA	1435	17	75	0	0	A_42_P714166	NM_001017491	11766.6	301.573	6.093205e+000	4.614421e+000	86	77	2.004692e+001	0	0	0	0	0	0	5.0229	1	0	65	80.0571
DATA	1436	17	76	0	0	A_64_P098703	NM_198728	11791.5	301.648	1.038742e+003	1.039755e+002	933	75	1.929673e+001	0	0	0	0	0	0	853.41	1	1	47.8731	77
DATA	1437	17	77	0	0	A_44_P624151	NM_001107932	11816.6	301.803	1.004388e+003	1.005443e+002	876	62.5	1.080783e+001	0	0	0	0	0	0	822.51	1	1	47.5395	64.1333
DATA	1438	17	78	0	0	A_42_P674843	NM_001008880	11841.8	301.753	7.809900e+002	7.823546e+001	684.5	66	1.359578e+001	0	0	0	0	0	0	637.552	1	1	49.5074	69.3871
DATA	1439	17	79	0	0	A_44_P1039634	NM_001108924	11868.4	301.573	1.133624e+002	1.224671e+001	175	70	1.332349e+001	0	0	0	0	0	0	92.2453	1	1	57.5363	72.85
DATA	1440	17	80	0	0	A_42_P517253	NM_001012275	11892.8	302.206	4.734490e+002	4.757229e+001	454.5	60	1.233200e+001	0	0	0	0	0	0	384.257	1	1	46.1809	62.359
DATA	1441	17	81	0	0	A_42_P485589	NM_017246	11919	301.545	1.208943e+002	1.295624e+001	175	61	1.089336e+001	0	0	0	0	0	0	97.8323	1	1	55.8519	61.8478
DATA	1442	17	82	66	1	DarkCorner	DarkCorner	11945.5	302.25	4.686574e+000	4.670808e+000	78	61	1.229400e+001	0	0	0	0	0	0	-1.83622	0	0	37.4241	59.6596
DATA	1443	17	83	66	1	DarkCorner	DarkCorner	11969.6	301.573	4.697530e+000	4.681794e+000	78.5	55.5	1.326481e+001	0	0	0	0	0	0	0.200463	0	0	65	58.1
DATA	1444	17	84	66	1	DarkCorner	DarkCorner	11994.8	302.062	4.706820e+000	4.690985e+000	80.5	59	1.536479e+001	0	0	0	0	0	0	-3.32799	0	0	49.5074	62.6316
DATA	1445	17	85	66	1	DarkCorner	DarkCorner	12020.6	301.573	4.716368e+000	4.715460e+000	85	58	1.297600e+001	0	0	0	0	0	0	3.01049	0	0	57.5363	59.0588
DATA	1446	18	1	66	1	DarkCorner	DarkCorner	9900.02	307.707	4.105565e+000	4.091754e+000	78	56	1.301687e+001	0	0	0	0	0	0	-3.64851	0	0	36.1258	55.2439
DATA	1447	18	2	66	1	DarkCorner	DarkCorner	9925.58	308.427	4.087626e+000	4.073875e+000	68.5	59.5	1.347404e+001	0	0	0	0	0	0	-13.4438	0	0	57.5363	57.6957
DATA	1448	18	3	66	1	DarkCorner	DarkCorner	9951.07	308.109	4.071236e+000	4.057540e+000	77	61	1.394937e+001	0	0	0	0	0	0	-3.69819	0	0	41.8414	60.5806
DATA	1449	18	4	0	0	A_42_P608713	TC595074	9976.5	308.352	6.326246e+002	6.339144e+001	683	58	8.496172e+000	0	0	0	0	0	0	590.174	1	1	57.5363	58.4194
DATA	1450	18	5	0	0	A_44_P411771	XM_001056376	10001.6	308.797	5.894154e+002	5.907894e+001	633.5	57	7.420999e+000	0	0	0	0	0	0	551.891	1	1	49.1849	56.0741
DATA	1451	18	6	0	0	A_42_P703647	NM_001108688	10026.6	308.671	3.337246e+001	5.219570e+000	114	51.5	8.201866e+000	0	0	0	0	0	0	31.3538	1	1	50.4627	51.5909
DATA	1452	18	7	0	0	A_64_P139212	NM_001030052	10051.8	308.775	3.050224e+004	3.050227e+003	28936	60	1.010292e+001	0	0	0	0	0	0	28750.8	1	1	47.2035	60
DATA	1453	18	8	0	0	A_64_P082461	FQ211879	10078.1	308.477	1.098882e+002	1.169002e+001	182	60.5	1.072997e+001	0	0	0	0	0	0	103.903	1	1	55.8519	61.0526
DATA	1454	18	9	0	0	A_64_P144053	NM_001108100	10103.4	308.427	3.794865e+002	3.815642e+001	442	53	8.289309e+000	0	0	0	0	0	0	359.841	1	1	57.5363	54.3333
DATA	1455	18	10	0	0	A_42_P455802	NM_001013929	10128	308.278	4.011383e+003	4.011580e+002	3612	56.5	1.445584e+001	0	0	0	0	0	0	3813.46	1	1	47.8731	58.8333
DATA	1456	18	11	0	0	A_44_P575367	ENSRNOT00000068160	10154.4	308.427	3.969364e+000	3.956012e+000	82	63	1.542007e+001	0	0	0	0	0	0	0.0290288	0	0	57.5363	64.4359
DATA	1457	18	12	0	0	A_64_P008259	ENSRNOT00000040453	10179.1	308.5	2.905286e+003	2.905554e+002	2897.5	50.5	7.089331e+000	0	0	0	0	0	0	2775.23	1	1	47.2035	50.5
DATA	1458	18	13	0	0	A_44_P433935	NM_001024894	10204.4	308.212	4.391222e+000	3.963722e+000	85	58	1.320353e+001	0	0	0	0	0	0	4.2031	1	0	45.835	59
DATA	1459	18	14	0	0	A_64_P027747	TC585156	10229.6	308.64	8.373097e+003	8.373189e+002	7864.5	66	1.216635e+001	0	0	0	0	0	0	8029.79	1	1	48.8603	63.2571
DATA	1460	18	15	0	0	A_44_P247880	ENSRNOT00000032333	10254.5	308.379	3.938733e+000	3.937122e+000	86	59	9.287135e+000	0	0	0	0	0	0	2.90575	0	0	45.835	60.4286
DATA	1461	18	16	0	0	A_44_P422321	NM_001105813	10280.1	309.25	2.506238e+003	2.506545e+002	2448	59	1.056239e+001	0	0	0	0	0	0	2411.22	1	1	46.1809	60.7436
DATA	1462	18	17	0	0	A_44_P374824	ENSRNOT00000025777	10306.6	308.427	3.929914e+001	5.546790e+000	123.5	60	1.401122e+001	0	0	0	0	0	0	37.8549	1	1	57.5363	62.8333
DATA	1463	18	18	0	0	A_64_P029482	A_64_P029482	10332	308.455	3.914843e+001	5.533144e+000	116.5	61	1.037873e+001	0	0	0	0	0	0	37.7503	1	1	55.8519	61.4444
DATA	1464	18	19	0	0	A_64_P083918	NM_053396	10356.7	308.544	1.616956e+001	4.228207e+000	99	65.5	8.337063e+000	0	0	0	0	0	0	15.6056	1	0	46.5243	64.8929
DATA	1465	18	20	1028	1	(+)E1A_r60_3	E1A_r60_3	10382.7	308.5	2.760205e+001	4.781286e+000	110.5	64	1.450473e+001	0	0	0	0	0	0	26.6579	1	1	57.5363	65.5
DATA	1466	18	21	0	0	A_42_P508415	CV108834	10408.3	308.5	1.527112e+002	1.576179e+001	238	70.5	1.691198e+001	0	0	0	0	0	0	147.561	1	1	57.5363	71.7188
DATA	1467	18	22	0	0	A_64_P018331	NM_001107720	10433.1	309.123	1.780946e+003	1.781374e+002	1789	67	1.217095e+001	0	0	0	0	0	0	1721.55	1	1	45.835	66.9189
DATA	1468	18	23	0	0	A_64_P142056	NM_001011938	10458.4	309.129	1.048953e+004	1.048960e+003	10131	66	1.014583e+001	0	0	0	0	0	0	10140.8	1	1	46.8651	66.4
DATA	1469	18	24	0	0	A_44_P1030098	NM_001105866	10484.4	308.427	2.337080e+002	2.369413e+001	309.5	64.5	8.764614e+000	0	0	0	0	0	0	225.897	1	1	65	64.4615
DATA	1470	18	25	0	0	A_64_P125958	NM_177933	10508.8	308.694	5.303596e+001	6.584207e+000	134	67.5	1.477342e+001	0	0	0	0	0	0	51.2527	1	1	47.8731	66.9375
DATA	1471	18	26	0	0	A_64_P002066	XM_001056138	10535.3	308.5	6.511095e+001	7.591644e+000	144	75	1.339930e+001	0	0	0	0	0	0	62.8906	1	1	65	74.8148
DATA	1472	18	27	0	0	A_42_P521242	ENSRNOT00000003841	10560	308.701	1.694792e+003	1.695242e+002	1673	65	1.419053e+001	0	0	0	0	0	0	1636.05	1	1	45.835	66.0606
DATA	1473	18	28	0	0	A_42_P652827	NM_001024274	10584.9	308.718	3.633996e+003	3.634206e+002	3421.5	66	1.464229e+001	0	0	0	0	0	0	3505.3	1	1	47.2035	70.1538
DATA	1474	18	29	0	0	A_42_P533792	NM_001106575	10610.6	308.959	1.004181e+004	1.004188e+003	9160	62	1.619426e+001	0	0	0	0	0	0	9677.02	1	1	48.5334	62.4333
DATA	1475	18	30	1028	1	(+)E1A_r60_1	E1A_r60_1	10635.1	308.96	3.930252e+000	3.917030e+000	80	61	1.458428e+001	0	0	0	0	0	0	-3.67626	0	0	38.6789	62.7317
DATA	1476	18	31	0	0	A_64_P210103	NM_001100666	10662.1	308.5	1.101221e+002	1.169005e+001	188	61.5	1.563754e+001	0	0	0	0	0	0	105.848	1	1	56.9804	64.325
DATA	1477	18	32	0	0	A_64_P131745	A_64_P131745	10687.5	308.5	4.540297e+001	6.004071e+000	126	59.5	9.468436e+000	0	0	0	0	0	0	43.5755	1	1	65	62.2
DATA	1478	18	33	0	0	A_64_P017791	XM_002727063	10712.9	308.5	6.379763e+000	3.986575e+000	87	61.5	8.123557e+000	0	0	0	0	0	0	6.11285	1	0	56.9804	61.1842
DATA	1479	18	34	0	0	A_42_P560288	NM_198788	10737.6	308.843	1.227437e+004	1.227443e+003	11448.5	63	1.189634e+001	0	0	0	0	0	0	11740.8	1	1	47.5395	63.1667
DATA	1480	18	35	0	0	A_42_P571463	NM_001013221	10763.6	308.573	1.872259e+003	1.872675e+002	1850.5	56.5	1.098714e+001	0	0	0	0	0	0	1787.18	1	1	57.5363	56.8
DATA	1481	18	36	0	0	A_42_P648207	NM_001013882	10788.5	309.217	7.712935e+002	7.723083e+001	811	51	7.821551e+000	0	0	0	0	0	0	734.796	1	1	46.8651	51.52
DATA	1482	18	37	0	0	A_64_P120833	NM_131910	10813.4	309.338	1.034685e+004	1.034693e+003	9693	47	9.436386e+000	0	0	0	0	0	0	9835.54	1	1	46.5243	48.1143
DATA	1483	18	38	0	0	A_42_P705337	TC582694	10839.5	308.956	1.708645e+003	1.709108e+002	1489	47.5	1.019310e+001	0	0	0	1	0	0	1620.08	1	1	46.5243	48.6875
DATA	1484	18	39	0	0	A_44_P544340	NM_001034939	10864.7	308.911	6.634156e+002	6.646124e+001	709	49	9.938271e+000	0	0	0	0	0	0	627.429	1	1	49.8279	52.6667
DATA	1486	18	41	0	0	A_44_P310596	NM_001014166	10915.2	308.836	1.055191e+003	1.055952e+002	1072.5	62	1.780217e+001	0	0	0	0	0	0	992.483	1	1	47.5395	65.1622
DATA	1487	18	42	0	0	A_64_P013409	A_64_P013409	10941.4	308.573	8.342245e+000	4.106866e+000	87	70	2.021960e+001	0	0	0	0	0	0	7.82219	1	0	57.5363	70.9677
DATA	1488	18	43	0	0	A_64_P076485	A_64_P076485	10966.2	308.864	1.499061e+003	1.499603e+002	1489	86	6.300662e+001	0	0	0	0	1	0	1401.47	1	1	45.835	110.538
DATA	1489	18	44	0	0	A_64_P096121	ENSRNOT00000028891	10992.4	308.573	5.658977e+001	6.956969e+000	136	66	1.478309e+001	0	0	0	0	0	0	52.7288	1	1	57.5363	65.1613
DATA	1490	18	45	0	0	A_42_P521086	NM_001100857	11016.9	308.871	7.052541e+001	8.137362e+000	150	63	1.421518e+001	0	0	0	0	0	0	65.5081	1	1	45.1352	67.9259
DATA	1491	18	46	0	0	A_64_P143133	TC637520	11043	308.545	1.889601e+001	4.490750e+000	100	70	1.704970e+001	0	0	0	0	0	0	17.4892	1	0	55.8519	72.3077
DATA	1492	18	47	0	0	A_64_P067163	NM_017248	11067.7	309.167	4.430439e+004	4.430441e+003	39386	65	1.082297e+001	0	0	0	0	0	0	40871	1	1	45.835	64.9667
DATA	1493	18	48	0	0	A_64_P118288	NM_053448	11093.6	308.573	5.167522e+002	5.183784e+001	551	58	1.132776e+001	0	0	0	0	0	0	474.902	1	1	57.5363	59.4545
DATA	1494	18	49	0	0	A_64_P112342	A_64_P112342	11119.4	308.573	3.580798e+001	5.457340e+000	118	57.5	1.157161e+001	0	0	0	0	0	0	32.7844	1	1	57.5363	57.9688
DATA	1495	18	50	0	0	A_64_P074741	NM_001077680	11144.6	308.573	6.877872e+001	8.024540e+000	140.5	59	1.099289e+001	0	0	0	0	0	0	62.7354	1	1	57.5363	58.4571
DATA	1496	18	51	0	0	A_64_P153062	NM_001107890	11170	308.545	4.785715e+002	4.803674e+001	509	58	9.819695e+000	0	0	0	0	0	0	434.835	1	1	55.8519	58.3438
DATA	1497	18	52	0	0	A_64_P051942	A_64_P051942	11194.9	308.914	3.066733e+002	3.094893e+001	358	57	1.085501e+001	0	0	0	0	0	0	277.596	1	1	43.7019	56.5641
DATA	1498	18	53	0	0	A_44_P233080	ENSRNOT00000026303	11220.3	309.284	5.452149e+003	5.452309e+002	4869.5	63	1.364968e+001	0	0	0	0	0	0	4915.86	1	1	46.1809	62.2703
DATA	1499	18	54	0	0	A_64_P127747	A_64_P127747	11245.6	308.986	1.450323e+002	1.509888e+001	205	59	6.874992e+000	0	0	0	0	0	0	130.231	1	1	48.2044	59.1
DATA	1500	18	55	0	0	A_42_P773155	NM_001106996	11271.3	309.313	3.285923e+004	3.285926e+003	28502.5	62	1.062306e+001	0	0	0	0	0	0	29385.3	1	1	45.835	60.129
DATA	1501	18	56	0	0	A_64_P003624	NM_175591	11296.9	308.593	6.462971e+001	7.726694e+000	137	58	1.359785e+001	0	0	0	0	0	0	57.5474	1	1	56.9804	61.1628
DATA	1502	18	57	0	0	A_64_P148728	NM_030989	11321.8	308.855	5.127768e+002	5.145365e+001	533.5	62	1.175256e+001	0	0	0	0	0	0	454.738	1	1	46.1809	62.4516
DATA	1503	18	58	0	0	A_44_P436284	ENSRNOT00000031389	11346.7	309.167	5.303747e+002	5.320901e+001	531	61.5	1.165066e+001	0	0	0	0	0	0	468.427	1	1	45.835	63.575
DATA	1504	18	59	0	0	A_42_P626851	NM_001107917	11373.1	308.614	1.319674e+003	1.320371e+002	1195	66	1.379819e+001	0	0	0	0	0	0	1160.27	1	1	57.259	65.16
DATA	1505	18	60	0	0	A_42_P797303	TC587453	11397.6	309.265	1.859616e+004	1.859621e+003	15846	72	1.227070e+001	0	0	0	0	0	0	16285	1	1	46.5243	72.1515
DATA	1506	18	61	0	0	A_64_P096312	A_64_P096312	11423.6	308.573	5.431426e+003	5.431599e+002	5167.5	55	1.456847e+001	0	0	0	0	0	0	4734.98	1	1	57.5363	59.3714
DATA	1507	18	62	0	0	A_64_P150894	A_64_P150894	11449	309.368	3.805089e+002	3.829793e+001	418	60	9.774378e+000	0	0	0	0	0	0	330.361	1	1	45.835	58.3333
DATA	1508	18	63	0	0	A_64_P241372	NM_001000593	11474.6	308.573	2.871492e+001	5.222635e+000	106	61	1.108021e+001	0	0	0	0	0	0	24.8193	1	1	65	62.3235
DATA	1509	18	64	0	0	A_44_P433621	NM_001025016	11500.1	308.614	5.059557e+002	5.078489e+001	516	61	1.374207e+001	0	0	0	0	0	0	435.456	1	1	57.259	63.1111
DATA	1510	18	65	0	0	A_64_P163511	NM_013190	11525.5	308.648	2.289896e+003	2.290318e+002	2026	63	1.315454e+001	0	0	0	0	0	0	1962.52	1	1	57.5363	64.3421
DATA	1511	18	66	0	0	A_44_P129412	AF155959	11550.6	308.573	2.666361e+003	2.666727e+002	2275	68	1.379539e+001	0	0	0	0	0	0	2275.68	1	1	57.5363	65.7931
DATA	1512	18	67	0	0	A_64_P143037	NM_001025134	11575.5	309.348	5.621606e+002	5.639075e+001	560	69	1.622006e+001	0	0	0	0	0	0	477.922	1	1	45.835	70.5897
DATA	1513	18	68	0	0	A_64_P032693	XM_002724830	11601.5	308.648	2.764635e+001	5.242709e+000	103	61	1.314006e+001	0	0	0	0	0	0	23.4014	1	1	57.5363	64.3488
DATA	1514	18	69	0	0	A_42_P727368	NM_001025693	11627	308.681	1.131889e+002	1.217053e+001	174	60.5	1.144853e+001	0	0	0	0	0	0	95.4218	1	1	58.0869	62.5714
DATA	1515	18	70	0	0	A_64_P075765	A_64_P075765	11651.8	308.928	2.656633e+001	5.216855e+000	102	59.5	1.205127e+001	0	0	0	0	0	0	22.3108	1	1	46.5243	60.46
DATA	1516	18	71	0	0	A_42_P639174	NM_001106592	11677.6	309.177	2.359663e+003	2.360094e+002	2005.5	65	1.332703e+001	0	0	0	0	0	0	1973.95	1	1	49.5074	65.1212
DATA	1517	18	72	0	0	A_64_P063135	NM_001109623	11703.3	309.397	9.570484e+001	1.058611e+001	165.5	66	1.425664e+001	0	0	0	0	0	0	79.7563	1	1	46.1809	68.2424
DATA	1518	18	73	0	0	A_64_P018236	NM_001108882	11728.5	309	9.474005e+000	4.639480e+000	88	69	1.218353e+001	0	0	0	0	0	0	7.86537	1	0	65	70.5294
DATA	1519	18	74	0	0	A_43_P14648	NM_001012034	11753.2	309.103	1.071487e+003	1.072456e+002	933.5	77	2.048496e+001	0	0	0	0	0	0	886.457	1	1	46.5243	77.4419
DATA	1520	18	75	0	0	A_42_P698520	NM_001108216	11778.7	309	7.476931e+003	7.477071e+002	5967	77	2.172408e+001	0	0	0	0	1	0	6163.89	1	1	49.1849	82.25
DATA	1521	18	76	0	0	A_43_P19450	NM_001105713	11804	309	2.136236e+002	2.184974e+001	258	61	1.229233e+001	0	0	0	0	0	0	175.516	1	1	46.8651	61.8333
DATA	1522	18	77	0	0	A_64_P013012	XM_225619	11829.7	309.118	5.642318e+002	5.661072e+001	544	62.5	1.123646e+001	0	0	0	0	0	0	462.073	1	1	48.8603	63.25
DATA	1523	18	78	0	0	A_42_P499684	NM_001108642	11854.7	309.1	7.836451e+002	7.850048e+001	705	69.5	1.448554e+001	0	0	0	1	0	0	639.805	1	1	47.2035	72.2143
DATA	1524	18	79	0	0	A_64_P297479	ENSRNOT00000044350	11880.1	309.104	3.489058e+004	3.489061e+003	29125	65.5	1.158859e+001	0	0	0	0	0	0	28402.6	1	1	46.8651	67.1538
DATA	1525	18	80	0	0	A_64_P103238	NM_001014158	11905.5	309	6.365761e+002	6.382685e+001	580	61	1.030904e+001	0	0	0	0	0	0	516.752	1	1	48.5334	61.925
DATA	1526	18	81	0	0	A_42_P751562	NM_001037355	11931	309	6.711828e+003	6.711990e+002	5308	63.5	1.225999e+001	0	0	0	0	0	0	5434.22	1	1	46.8651	62.2174
DATA	1527	18	82	66	1	DarkCorner	DarkCorner	11957	309	4.684288e+000	4.668530e+000	74	61.5	1.167539e+001	0	0	0	0	0	0	-7.49229	0	0	65	60.5588
DATA	1528	18	83	66	1	DarkCorner	DarkCorner	11982.5	309	4.694691e+000	4.678897e+000	74	57	1.341644e+001	0	0	0	0	0	0	-8.44057	0	0	54.1152	59.6176
DATA	1529	18	84	66	1	DarkCorner	DarkCorner	12007.5	309	4.703943e+000	4.688119e+000	77	60	1.678807e+001	0	0	0	0	0	0	-4.68645	0	0	54.1152	64.2821
DATA	1530	18	85	66	1	DarkCorner	DarkCorner	12033.5	309	4.712512e+000	4.696659e+000	81	51	1.085048e+001	0	0	0	0	0	0	-0.147914	0	0	54.1152	52.1697
DATA	1531	19	1	66	1	DarkCorner	DarkCorner	9887.06	315.029	4.110280e+000	4.096452e+000	79	49	1.072620e+001	0	0	0	0	0	0	-1.95699	0	0	46.8651	49.8623
DATA	1532	19	2	66	1	DarkCorner	DarkCorner	9912.73	316.078	4.091676e+000	4.077912e+000	74.5	59	1.093652e+001	0	0	0	0	0	0	-5.78913	0	0	40.2912	57.619
DATA	1533	19	3	66	1	DarkCorner	DarkCorner	9938.5	315.5	4.074873e+000	4.061165e+000	67.5	63	1.382228e+001	0	0	0	0	0	0	-11.8868	0	0	57.5363	59.8889
DATA	1534	19	4	66	1	DarkCorner	DarkCorner	9963.67	315.5	4.058977e+000	4.045322e+000	75	60	9.539392e+000	0	0	0	0	0	0	-5.44702	0	0	57.5363	61.5
DATA	1535	19	5	0	0	A_44_P198705	NM_012578	9988.51	316.129	1.508414e+004	1.508419e+003	13717.5	56.5	7.437638e+000	0	0	0	0	0	0	14112.6	1	1	47.8731	57.0385
DATA	1536	19	6	0	0	A_42_P604252	NM_001108797	10013.9	316.261	9.218629e+002	9.227372e+001	929	52	9.539181e+000	0	0	0	0	0	0	865.572	1	1	46.1809	53.3125
DATA	1537	19	7	0	0	A_43_P20016	NM_001107377	10040	315.545	1.087106e+002	1.158441e+001	185	57	1.069053e+001	0	0	0	0	0	0	102.415	1	1	55.8519	56.2308
DATA	1538	19	8	0	0	A_42_P491486	NM_022533	10064.6	316.214	5.185327e+003	5.185481e+002	4695	61	1.093251e+001	0	0	0	0	0	0	4900.48	1	1	47.5395	61.6552
DATA	1539	19	9	0	0	A_64_P345929	NM_001191639	10090	315.836	1.944825e+001	4.428055e+000	101	55	1.277805e+001	0	0	0	0	0	0	18.4336	1	0	46.8651	59.75
DATA	1540	19	10	0	0	A_64_P152047	NM_001000521	10116.3	315.5	1.029270e+001	4.098269e+000	96.5	53.5	1.419220e+001	0	0	0	0	0	0	9.78323	1	0	65	56.875
DATA	1541	19	11	0	0	A_42_P724510	NM_001007625	10140.7	315.838	1.661597e+004	1.661602e+003	15606	71.5	1.439564e+001	0	0	0	1	0	0	15833.1	1	1	49.1849	70.9118
DATA	1542	19	12	0	0	A_42_P552906	NM_001007701	10166.3	315.9	2.565904e+003	2.566207e+002	2453	58	1.105487e+001	0	0	0	0	0	0	2450.89	1	1	47.2035	60.0909
DATA	1543	19	13	0	0	A_64_P121673	A_64_P121673	10191.8	315.736	1.085845e+001	4.085929e+000	90.5	54	1.388649e+001	0	0	0	0	0	0	10.3941	1	0	47.5395	58.0625
DATA	1544	19	14	0	0	A_64_P047470	NM_001008875	10217.6	315.573	4.037996e+001	5.635608e+000	119	63	1.520902e+001	0	0	0	0	0	0	38.7295	1	1	65	63.5758
DATA	1545	19	15	0	0	A_43_P14911	NM_031512	10243.3	315.5	6.225733e+001	7.359313e+000	148	63	9.355883e+000	0	0	0	0	0	0	59.8191	1	1	57.5363	61.8056
DATA	1546	19	16	0	0	A_44_P117234	NM_001191788	10268.5	315.5	2.836998e+001	4.837407e+000	107	59.5	1.054371e+001	0	0	0	0	0	0	27.3013	1	1	65	61.3542
DATA	1547	19	17	0	0	A_64_P066782	ENSRNOT00000046676	10293.9	315.5	7.914575e+002	7.924241e+001	831.5	61	1.500291e+001	0	0	0	0	0	0	762.689	1	1	56.9804	62.1714
DATA	1548	19	18	0	0	A_64_P125013	NM_019167	10319.4	315.573	5.929987e+004	5.929989e+003	56594	67	1.258159e+001	0	0	0	0	0	0	57212.5	1	1	57.5363	67
DATA	1549	19	19	0	0	A_64_P143121	NM_001099510	10344.6	315.573	1.622992e+001	4.228232e+000	96	66	1.158714e+001	0	0	0	0	0	0	15.6738	1	0	57.5363	66.1905
DATA	1550	19	20	0	0	A_64_P065600	NM_022954	10369.5	316.366	3.914030e+000	3.901191e+000	83	68	1.190553e+001	0	0	0	0	0	0	0.488897	0	0	50.4627	68.3077
DATA	1551	19	21	0	0	A_44_P300818	AF030087	10394.4	316.299	1.175123e+003	1.175769e+002	1191	74.5	1.600758e+001	0	0	0	0	0	0	1136.53	1	1	46.1809	71.9737
DATA	1552	19	22	0	0	A_64_P103130	A_64_P103130	10420.2	316.234	3.779088e+003	3.779289e+002	3808	70	1.465038e+001	0	0	0	0	0	0	3656.45	1	1	45.1352	70.2432
DATA	1553	19	23	0	0	A_64_P064938	NM_001109332	10446.4	315.573	1.282416e+001	4.102160e+000	94	68	9.785290e+000	0	0	0	0	0	0	12.4095	1	0	57.5363	66.4242
DATA	1554	19	24	0	0	A_64_P087276	NM_138527	10471.6	315.573	3.909616e+000	3.896464e+000	74.5	65	9.778331e+000	0	0	0	0	0	0	-5.89707	0	0	65	65.5172
DATA	1555	19	25	0	0	A_64_P032728	NM_001037778	10496.3	315.878	1.833293e+004	1.833297e+003	17074	65	2.074034e+001	0	0	0	0	0	0	17738.6	1	1	48.8603	67.5238
DATA	1556	19	26	0	0	A_44_P956203	NM_001134992	10522.5	315.648	1.539680e+001	4.191443e+000	97	72	1.467746e+001	0	0	0	0	0	0	14.8919	1	0	57.5363	71.1935
DATA	1557	19	27	0	0	A_64_P106488	A_64_P106488	10547.3	315.467	4.914735e+001	6.274447e+000	129	65.5	1.221286e+001	0	0	0	0	0	0	47.5098	1	1	49.1849	67.4667
DATA	1558	19	28	0	0	A_43_P10011	NM_001025274	10572.5	316.136	9.079517e+002	9.087902e+001	952	67.5	1.231079e+001	0	0	0	0	0	0	877.178	1	1	45.835	68
DATA	1559	19	29	0	0	A_44_P321009	NM_012540	10598.6	315.573	6.054604e+000	3.953354e+000	90	68	1.555898e+001	0	0	0	0	0	0	5.84359	1	0	57.5363	68.3256
DATA	1560	19	30	0	0	A_44_P133453	XM_236776	10623.4	316.173	4.064495e+003	4.064683e+002	3879.5	67	1.328808e+001	0	0	0	0	0	0	3919.16	1	1	49.8279	62.8696
DATA	1561	19	31	0	0	A_64_P027323	NM_001000088	10649.5	315.648	6.647815e+001	7.715289e+000	152	62	1.538390e+001	0	0	0	0	0	0	64.015	1	1	57.5363	65.0465
DATA	1562	19	32	0	0	A_44_P374568	NM_001107778	10673.8	316.353	6.523364e+002	6.535134e+001	686	68	1.484525e+001	0	0	0	0	0	0	627.4	1	1	46.5243	69.0286
DATA	1563	19	33	0	0	A_64_P040176	NM_001108498	10699.4	316.265	2.347447e+003	2.347776e+002	2254	62	8.718124e+000	0	0	0	0	0	0	2254.15	1	1	46.5243	63.5455
DATA	1564	19	34	0	0	A_64_P347204	ENSRNOT00000002350	10725.5	315.648	1.492187e+002	1.543173e+001	226	68	1.371725e+001	0	0	0	0	0	0	143.02	1	1	57.5363	68.6857
DATA	1565	19	35	0	0	A_64_P142544	A_64_P142544	10750.9	315.614	4.951233e+001	6.328467e+000	125	60	1.121748e+001	0	0	0	0	0	0	47.366	1	1	65	59.1429
DATA	1566	19	36	0	0	A_64_P047367	NM_017050	10776.5	315.648	6.314523e+004	6.314524e+003	59893	52	1.143522e+001	0	0	0	0	0	0	60284.4	1	1	57.5363	52.9167
DATA	1567	19	37	0	0	A_64_P130858	NM_001003705	10801.6	315.573	1.919445e+002	1.959830e+001	264	48.5	1.317030e+001	0	0	0	0	0	0	182.85	1	1	65	52.1364
DATA	1568	19	38	0	0	A_42_P647009	NM_053814	10826.7	316.155	2.841231e+003	2.841508e+002	2776	50	1.416698e+001	0	0	0	0	0	0	2700.66	1	1	47.5395	52.3548
DATA	1569	19	39	0	0	A_42_P618538	NM_001030031	10851.6	316.092	1.282719e+003	1.283336e+002	1227	47	7.807771e+000	0	0	0	0	1	0	1216.29	1	1	49.1849	47.8065
DATA	1570	19	40	0	0	A_64_P048225	NM_001108643	10877.5	316.212	9.325946e+001	1.014246e+001	164	55	9.571252e+000	0	0	0	0	0	0	88.1964	1	1	46.5243	55.4375
DATA	1571	19	41	0	0	A_64_P044826	A_64_P044826	10902.6	315.944	2.004954e+002	2.044427e+001	272.5	55	7.772173e+000	0	0	0	0	0	0	189.087	1	1	48.2044	54.64
DATA	1572	19	42	0	0	A_64_P046273	NM_001168559	10927.6	316.043	3.247466e+002	3.272122e+001	383	70.5	1.726608e+001	0	0	0	0	0	0	305.409	1	1	46.8651	70.1316
DATA	1573	19	43	0	0	A_43_P16232	NM_024395	10953.2	316.194	1.103084e+003	1.103817e+002	1105	71	3.629497e+001	0	0	0	0	1	0	1034.3	1	1	47.5395	82.4839
DATA	1574	19	44	0	0	A_44_P147356	XM_225859	10978.9	316.025	1.586482e+004	1.586487e+003	14740	65	2.570677e+001	0	0	0	0	0	0	14828.1	1	1	49.8279	71.6341
DATA	1575	19	45	0	0	A_44_P979417	ENSRNOT00000068382	11004.9	315.935	3.311139e+001	5.229412e+000	114	67.5	1.152653e+001	0	0	0	0	0	0	30.845	1	1	65	67.0333
DATA	1576	19	46	0	0	A_44_P283784	NM_001107682	11029.6	316.043	5.339549e+002	5.354968e+001	587	64	1.693927e+001	0	0	0	0	0	0	495.801	1	1	46.8651	68.5
DATA	1577	19	47	0	0	A_44_P112061	ENSRNOT00000046359	11055.5	316	6.856937e+002	6.869035e+001	707.5	72	1.484651e+001	0	0	0	0	0	0	634.459	1	1	54.1152	72.6522
DATA	1578	19	48	0	0	A_42_P541025	NM_212546	11080.6	316.294	3.886672e+002	3.908123e+001	443	65	1.258355e+001	0	0	0	0	0	0	358.39	1	1	46.8651	63.9063
DATA	1579	19	49	0	0	A_44_P156521	NM_001025135	11105.7	315.971	1.000577e+003	1.001419e+002	985.5	56	9.700201e+000	0	0	0	0	0	0	919.257	1	1	46.1809	55.3902
DATA	1580	19	50	0	0	A_42_P562202	NM_001107959	11131.5	316	7.027759e+001	8.146228e+000	143.5	61	1.390229e+001	0	0	0	0	0	0	64.3222	1	1	54.1152	59.6176
DATA	1581	19	51	0	0	A_42_P522899	NM_021578	11156.7	315.973	1.802013e+002	1.848852e+001	248	59	9.710027e+000	0	0	0	0	0	0	164.308	1	1	49.1849	58.65
DATA	1582	19	52	0	0	A_42_P581060	NM_001108722	11181.6	316.043	1.159930e+004	1.159937e+003	10068	56.5	8.799691e+000	0	0	0	0	0	0	10536.2	1	1	46.8651	56.6053
DATA	1583	19	53	0	1	ERCC-00043_129	ERCC-00043_129	11208	316	4.182192e+000	4.170189e+000	81.5	57	1.173089e+001	0	0	0	0	0	0	1.18719	0	0	65	58.8
DATA	1584	19	54	0	0	A_64_P098577	A_64_P098577	11233.5	316	6.673779e+000	4.237843e+000	89	60.5	9.213802e+000	0	0	0	0	0	0	6.01293	1	0	54.1152	61.4063
DATA	1585	19	55	0	0	A_64_P043164	ENSRNOT00000009696	11258.2	316.219	5.548567e+002	5.564450e+001	587	61	1.008430e+001	0	0	0	0	0	0	497.965	1	1	47.5395	61.5455
DATA	1586	19	56	0	0	A_42_P576446	NM_001107673	11283.2	316.194	8.394410e+003	8.394516e+002	7083	62.5	1.256485e+001	0	0	0	0	0	0	7503.11	1	1	47.5395	63.3056
DATA	1587	19	57	0	0	A_42_P801593	NM_001134744	11308.8	316.116	2.750562e+003	2.750889e+002	2401.5	57	1.423559e+001	0	0	0	0	0	0	2448.2	1	1	46.5243	62.2286
DATA	1588	19	58	0	0	A_42_P535743	NM_199393	11334.2	316.194	4.623460e+003	4.623656e+002	4001	60	1.227828e+001	0	0	0	0	0	0	4098.02	1	1	47.5395	62.5517
DATA	1589	19	59	0	0	A_64_P051890	ENSRNOT00000056631	11360.5	316	2.615616e+001	5.009842e+000	106	62	1.262505e+001	0	0	0	0	0	0	23.0815	1	1	54.1152	63.5
DATA	1590	19	60	0	0	A_64_P098379	NM_001013890	11385.5	316	1.921879e+001	4.701479e+000	101	64	1.067496e+001	0	0	0	0	0	0	16.8889	1	0	65	61.7083
DATA	1591	19	61	0	0	A_64_P144513	XR_086096	11411.4	316.069	7.340146e+004	7.340147e+003	63466	72	1.744121e+001	0	0	0	0	0	0	64224.6	1	1	53.8203	69.5897
DATA	1592	19	62	0	0	A_44_P325337	NM_001030041	11435.9	316.254	1.214714e+002	1.289477e+001	186	57.5	1.303342e+001	0	0	0	0	0	0	105.853	1	1	47.2035	58.4688
DATA	1593	19	63	0	0	A_44_P142029	NM_001002851	11461.2	316.194	1.080351e+004	1.080360e+003	9193	60.5	9.665734e+000	0	0	0	0	0	0	9374.41	1	1	47.5395	59.8438
DATA	1594	19	64	0	0	A_44_P292568	NM_001000207	11486.7	316.421	1.268318e+002	1.341288e+001	194	62.5	1.428322e+001	0	0	0	0	0	0	109.591	1	1	49.5074	63.8
DATA	1595	19	65	0	0	A_42_P624092	XR_007263	11511.9	316.278	9.021348e+003	9.021454e+002	7374.5	69	1.453718e+001	0	0	0	0	0	0	7762.23	1	1	47.8731	67.7826
DATA	1596	19	66	0	0	A_42_P597322	NM_001103357	11537.6	316.092	7.246460e+002	7.259812e+001	683	67.5	1.404655e+001	0	0	0	0	0	0	620.831	1	1	49.1849	65.7188
DATA	1597	19	67	0	0	A_64_P034409	NM_001108146	11563.1	316.392	2.006436e+003	2.006923e+002	1809.5	67	1.184599e+001	0	0	0	0	0	0	1711.94	1	1	49.1849	66.5517
DATA	1598	19	68	0	0	A_64_P112797	NM_001001121	11588.3	316.627	2.060496e+002	2.107728e+001	259	65	1.410262e+001	0	0	0	0	0	0	175.098	1	1	46.1809	66.4359
DATA	1599	19	69	0	0	A_42_P761023	NM_001144870	11614.4	316.427	3.094289e+002	3.126208e+001	342	63	1.349572e+001	0	0	0	0	0	0	261.836	1	1	65	64.0263
DATA	1600	19	70	0	0	A_42_P465408	NM_031647	11638.9	316.575	1.010327e+003	1.011317e+002	902	62.5	1.049883e+001	0	0	0	1	0	0	851.67	1	1	50.1463	62.6765
DATA	1601	19	71	0	0	A_64_P115761	NM_001109379	11665.1	316.386	4.197160e+001	6.147259e+000	119.5	62	1.335331e+001	0	0	0	0	0	0	35.2355	1	1	57.259	62.1951
DATA	1602	19	72	0	0	A_64_P086487	A_64_P086487	11690.5	316.352	9.078666e+000	4.599280e+000	91.5	70	1.101656e+001	0	0	0	0	0	0	7.59221	1	0	65	68.6897
DATA	1603	19	73	0	0	A_42_P774028	NM_001017447	11714.7	316.627	3.007537e+003	3.007877e+002	2509	68.5	1.370607e+001	0	0	0	0	0	0	2506.24	1	1	49.1849	69.9722
DATA	1604	19	74	0	0	A_44_P233080	ENSRNOT00000026303	11740.7	316.264	5.576022e+003	5.576207e+002	4609	68.5	1.624407e+001	0	0	0	0	0	0	4628.82	1	1	47.5395	73.4688
DATA	1605	19	75	0	0	A_64_P078002	ENSRNOT00000056206	11766.6	316.427	2.801042e+001	5.350255e+000	105.5	71	2.110395e+001	0	0	0	0	0	0	23.1691	1	1	65	74.6923
DATA	1606	19	76	0	0	A_64_P047888	A_64_P047888	11792	316.455	2.548261e+001	5.236049e+000	100	70	1.636868e+001	0	0	0	0	0	0	21.0059	1	1	55.8519	72.6061
DATA	1607	19	77	0	0	A_44_P236001	NM_001000623	11817.4	316.427	1.030829e+002	1.128373e+001	160	62	1.056091e+001	0	0	0	0	0	0	84.6924	1	1	65	61.9259
DATA	1608	19	78	0	0	A_42_P819040	TC636720	11842.6	316.427	1.464523e+001	4.831081e+000	95	69	1.669833e+001	0	0	0	0	0	0	11.9947	1	0	57.5363	73.1176
DATA	1609	19	79	0	0	A_44_P168184	NM_001166675	11868.4	316.427	2.108217e+003	2.108723e+002	1816	68	1.347141e+001	0	0	0	0	0	0	1721.38	1	1	57.5363	68.8571
DATA	1610	19	80	0	0	A_64_P094925	NM_001024748	11893	316.611	4.378005e+002	4.402425e+001	439	61	1.023679e+001	0	0	0	0	0	0	356.493	1	1	48.2044	61.6333
DATA	1611	19	81	0	0	A_44_P332483	NM_173338	11919	316.455	7.359586e+000	4.701411e+000	88	59.5	1.034478e+001	0	0	0	0	0	0	5.97611	1	0	55.8519	58.913
DATA	1612	19	82	0	0	A_42_P530071	NM_001107153	11943.9	316.5	8.500481e+003	8.500608e+002	6512	55	1.064556e+001	0	0	0	1	0	0	6885.67	1	1	49.8279	57.1463
DATA	1613	19	83	66	1	DarkCorner	DarkCorner	11969.3	316.296	4.681591e+000	4.687744e+000	87	58.5	1.172349e+001	0	0	0	0	0	0	3.65771	0	0	51.0895	58.1176
DATA	1614	19	84	66	1	DarkCorner	DarkCorner	11995.2	317.033	4.690925e+000	4.675145e+000	73	58	1.230802e+001	0	0	0	0	0	0	-7.60537	0	0	45.1352	58.4286
DATA	1615	19	85	66	1	DarkCorner	DarkCorner	12020.5	316.486	4.700345e+000	4.684532e+000	77	58.5	1.304506e+001	0	0	0	0	0	0	-3.95016	0	0	47.5395	59.7
DATA	1616	20	1	66	1	DarkCorner	DarkCorner	9900.5	323	4.095915e+000	4.082136e+000	72	55.5	1.242317e+001	0	0	0	0	0	0	-8.3123	0	0	54.1152	56.46
DATA	1617	20	2	66	1	DarkCorner	DarkCorner	9924.88	323.288	4.079146e+000	4.067208e+000	83	62	1.124528e+001	0	0	0	0	0	0	1.11728	0	0	40.2912	61.7059
DATA	1618	20	3	66	1	DarkCorner	DarkCorner	9951.09	322.935	4.062398e+000	4.048732e+000	71	57	1.442083e+001	0	0	0	0	0	0	-11.1693	0	0	54.4085	58.0909
DATA	1619	20	4	0	0	A_42_P787775	NM_001127566	9975.77	323.076	8.643907e+002	8.653313e+001	909	58	1.007397e+001	0	0	0	0	0	0	808.03	1	1	45.835	58.1212
DATA	1620	20	5	0	0	A_42_P607770	NM_001134616	10001	323.211	1.037078e+004	1.037086e+003	9133	57.5	8.507734e+000	0	0	0	0	0	0	9730	1	1	46.8651	57.6923
DATA	1621	20	6	0	0	A_42_P484738	NM_022266	10026.7	323.228	1.693284e+003	1.693758e+002	1608.5	55	9.540273e+000	0	0	0	0	0	0	1594.23	1	1	49.5074	54.4286
DATA	1622	20	7	0	0	A_64_P075273	NM_031743	10052.5	323	2.740616e+002	2.769533e+001	350	56	1.250108e+001	0	0	0	0	0	0	258.876	1	1	54.1152	56.9091
DATA	1623	20	8	0	0	A_42_P674050	NM_001107225	10077.6	323.357	8.976232e+003	8.976320e+002	8514	63	1.121309e+001	0	0	0	0	0	0	8504.97	1	1	47.2035	62
DATA	1624	20	9	1028	1	(+)E1A_r60_a107	E1A_r60_a107	10103.5	323	5.536774e+000	4.006542e+000	85	54	1.293599e+001	0	0	0	0	0	0	5.26114	1	0	54.1152	57.1613
DATA	1625	20	10	0	0	A_64_P144253	NM_201350	10128.6	322.931	2.195539e+001	4.525912e+000	101	57	1.324550e+001	0	0	0	0	0	0	20.9172	1	1	53.8203	60.88
DATA	1626	20	11	0	0	A_44_P791729	NM_181377	10153.2	323.475	9.770065e+003	9.770145e+002	9799.5	62	1.160209e+001	0	0	0	0	0	0	9331.05	1	1	42.9674	62.7429
DATA	1627	20	12	0	0	A_42_P550624	NM_001109319	10178.8	323.194	2.584906e+003	2.585206e+002	2477	53	8.941531e+000	0	0	0	0	0	0	2474.31	1	1	47.5395	54.4412
DATA	1628	20	13	0	0	A_43_P11580	NM_012833	10204.4	323.411	1.404344e+002	1.458317e+001	222.5	60	1.346087e+001	0	0	0	0	0	0	134.712	1	1	47.5395	61.5152
DATA	1629	20	14	0	0	A_44_P417055	XM_223442	10229.8	323.216	1.040478e+003	1.041218e+002	1058.5	64	1.271748e+001	0	0	0	0	0	0	999.919	1	1	47.8731	63.6486
DATA	1630	20	15	0	0	A_64_P142867	A_64_P142867	10255.1	323.333	1.355170e+004	1.355176e+003	13090	59	9.526267e+000	0	0	0	0	0	0	13045.4	1	1	45.1352	60.3043
DATA	1631	20	16	0	0	A_64_P013002	XM_001072551	10281.5	323	9.770328e+000	4.031265e+000	88.5	58.5	1.208425e+001	0	0	0	0	0	0	9.41931	1	0	54.1152	60.5652
DATA	1632	20	17	0	0	A_42_P457692	NM_001008363	10305.9	323.137	5.656360e+003	5.656495e+002	5230.5	68	1.866922e+001	0	0	0	0	0	0	5459.96	1	1	46.8651	71.1613
DATA	1633	20	18	0	0	A_42_P788480	NM_019194	10331.6	323.357	7.653219e+003	7.653319e+002	7180	67	1.806748e+001	0	0	0	0	0	0	7395.85	1	1	47.2035	71.7143
DATA	1634	20	19	0	0	A_42_P518462	NM_001007020	10356.8	323.194	7.741464e+003	7.741562e+002	7395	67.5	1.460716e+001	0	0	0	0	0	0	7487.57	1	1	47.5395	68.0357
DATA	1635	20	20	0	0	A_64_P007578	NM_001000851	10382.5	323	1.454276e+001	4.158355e+000	97	69	1.826525e+001	0	0	0	0	0	0	14.0754	1	0	65	73.6765
DATA	1636	20	21	0	0	A_64_P139350	NM_001191727	10408.4	323.069	3.381199e+001	5.156898e+000	116	76	2.006410e+001	0	0	0	0	0	0	32.7425	1	1	65	77.5455
DATA	1637	20	22	0	0	A_64_P100442	ENSRNOT00000067861	10433.4	323.742	1.207808e+002	1.268971e+001	199	71	9.485183e+000	0	0	0	0	0	0	117.008	1	1	44.7812	68.6316
DATA	1638	20	23	1028	1	(+)E1A_r60_a135	E1A_r60_a135	10458.9	323.065	3.905165e+000	3.892028e+000	79	67	1.251330e+001	0	0	0	0	0	0	-3.13414	0	0	54.4085	67.129
DATA	1639	20	24	0	0	A_44_P459760	NM_001108187	10484.5	323	3.672870e+001	5.351637e+000	116	68.5	2.109414e+001	0	0	0	0	0	0	35.5799	1	1	65	75.3529
DATA	1640	20	25	0	0	A_64_P115536	NM_212545	10509.5	323	4.883131e+000	3.923749e+000	86.5	75	1.919142e+001	0	0	0	0	0	0	4.72925	1	0	65	74.8148
DATA	1641	20	26	0	0	A_44_P538406	NM_013102	10534.3	323.015	1.910339e+004	1.910343e+003	17534	70	1.171875e+001	0	0	0	0	0	0	18493.8	1	1	46.1809	70.0645
DATA	1642	20	27	0	0	A_64_P120871	NM_198743	10560.1	323.278	8.930656e+002	8.939155e+001	917	70	1.230438e+001	0	0	0	0	0	0	864.072	1	1	47.8731	72.0909
DATA	1643	20	28	0	0	A_44_P173048	NM_001009255	10585	323.147	1.763838e+003	1.764269e+002	1741	66	1.300514e+001	0	0	0	0	0	0	1705.23	1	1	46.8651	67.8462
DATA	1644	20	29	0	0	A_64_P058060	NM_001037541	10611.4	323.427	2.126186e+001	4.445304e+000	105.5	71	1.647116e+001	0	0	0	0	0	0	20.5359	1	1	65	69.2286
DATA	1645	20	30	0	0	A_64_P145982	NM_001109366	10636.6	323.427	3.207929e+001	5.056194e+000	111	69	1.406292e+001	0	0	0	0	0	0	30.9492	1	1	65	66.8919
DATA	1646	20	31	0	0	A_42_P514244	NM_012791	10662.1	323.386	2.046454e+002	2.083535e+001	281	70	2.186857e+001	0	0	0	0	0	0	197.177	1	1	57.259	75.8
DATA	1648	20	33	0	0	A_64_P159155	XM_001071429	10712.6	323.404	2.005814e+001	4.408213e+000	102.5	65.5	1.178606e+001	0	0	0	0	0	0	19.2668	1	1	57.8122	68.0556
DATA	1649	20	34	0	0	A_64_P030272	ENSRNOT00000041731	10738.4	323.427	1.856762e+002	1.897951e+001	262	70	1.690662e+001	0	0	0	0	0	0	178.027	1	1	65	71.0769
DATA	1650	20	35	0	0	A_42_P733076	NM_001033867	10763.6	323.427	3.530312e+002	3.552232e+001	422	57	1.417362e+001	0	0	0	0	0	0	337.836	1	1	57.5363	57.2982
DATA	1651	20	36	0	0	A_44_P349475	NM_031333	10788.6	323.444	7.936532e+002	7.946347e+001	830	54	1.336066e+001	0	0	0	0	0	0	757.926	1	1	48.2044	54.2593
DATA	1652	20	37	0	0	A_64_P009848	NM_001034135	10813.6	323.5	4.791038e+003	4.791201e+002	4700	55	1.884398e+001	0	0	0	0	0	0	4565.31	1	1	48.5334	60.4688
DATA	1653	20	38	0	0	A_64_P116685	NM_001166763	10839.4	323.794	3.558157e+003	3.558378e+002	3518.5	48.5	1.400100e+001	0	0	0	0	0	0	3382.49	1	1	46.8651	52.1364
DATA	1654	20	39	0	0	A_64_P072659	NM_001109296	10864.4	323.536	1.513587e+003	1.514109e+002	1539.5	51	1.047300e+001	0	0	0	0	0	0	1435.21	1	1	46.8651	52.0606
DATA	1655	20	40	0	0	A_42_P808442	NM_001108759	10890.6	323.427	6.728867e+002	6.740672e+001	710	55	1.140413e+001	0	0	0	0	0	0	636.283	1	1	57.5363	52.8519
DATA	1656	20	41	0	0	A_64_P140836	NM_001017486	10915.4	323.23	1.315793e+002	1.375207e+001	208	66	1.367714e+001	0	0	0	0	0	0	124.078	1	1	48.8603	66.4651
DATA	1657	20	42	0	0	A_64_P034384	NM_019227	10941	323.231	4.012196e+002	4.032188e+001	438	72	1.970233e+001	0	0	0	0	0	0	377.23	1	1	49.5074	74
DATA	1658	20	43	0	0	A_42_P730411	NM_001012181	10966.2	323.386	7.094327e+002	7.105721e+001	745	73.5	2.754344e+001	0	0	0	0	0	0	665.022	1	1	47.2035	76.5625
DATA	1659	20	44	0	0	A_44_P396450	ENSRNOT00000018433	10991.5	323.5	1.840504e+002	1.884215e+001	254.5	63.5	1.105939e+001	0	0	0	0	0	0	171.99	1	1	46.5243	63.4118
DATA	1660	20	45	0	0	A_44_P268610	NM_001109134	11016.6	323.787	6.563142e+003	6.563267e+002	5962	75	2.035452e+001	0	0	0	0	0	0	6113.58	1	1	49.1849	75.375
DATA	1661	20	46	0	0	A_64_P059105	NM_001134544	11043	323.455	1.021591e+002	1.099397e+001	179	63	1.554646e+001	0	0	0	0	0	0	94.8215	1	1	55.8519	67.3077
DATA	1662	20	47	0	0	A_42_P524851	NM_001130061	11067.6	323.562	1.523845e+003	1.524390e+002	1430	67	1.427352e+001	0	0	0	0	0	0	1409.65	1	1	48.2044	69.6667
DATA	1663	20	48	0	0	A_64_P141675	FM127585	11093	323.722	3.912128e+003	3.912341e+002	3517	57	9.441728e+000	0	0	0	0	0	0	3606.16	1	1	47.8731	56.2903
DATA	1664	20	49	0	0	A_64_P002979	ENSRNOT00000034762	11119.3	323.5	4.120113e+000	4.107972e+000	82	57	1.140266e+001	0	0	0	0	0	0	1.09147	0	0	57.5363	58.0789
DATA	1665	20	50	0	0	A_44_P175822	NM_001109511	11143.6	323.676	1.700250e+002	1.749476e+001	235	60	5.760411e+000	0	0	0	0	0	0	155.571	1	1	46.5243	60.4815
DATA	1666	20	51	0	0	A_44_P1008751	NM_001137645	11169.9	323.5	2.161237e+002	2.200483e+001	278	58	9.519044e+000	0	0	0	0	0	0	196.961	1	1	65	58.7073
DATA	1667	20	52	0	0	A_44_P255350	NM_001007674	11195.4	323.427	3.470422e+002	3.495191e+001	401	57	1.066826e+001	0	0	0	0	0	0	315.028	1	1	57.5363	57.5714
DATA	1668	20	53	0	0	A_64_P017328	NM_012758	11220	323.532	5.500132e+002	5.515914e+001	575	59.5	1.113940e+001	0	0	0	0	0	0	497.369	1	1	43.7019	60.6154
DATA	1669	20	54	0	0	A_64_P132571	NM_001107703	11245.3	323.9	9.087763e+003	9.087859e+002	8132.5	63	1.127587e+001	0	0	0	0	0	0	8185.66	1	1	47.2035	64.875
DATA	1670	20	55	0	0	A_44_P107535	NM_001170336	11271.5	323.5	7.729675e+002	7.741100e+001	776	64	1.162294e+001	0	0	0	0	0	0	693.256	1	1	57.5363	63.9697
DATA	1671	20	56	0	0	A_44_P353618	NM_053587	11296.9	323.5	1.172043e+002	1.245751e+001	185	60	1.317111e+001	0	0	0	0	0	0	104.685	1	1	56.9804	61.8537
DATA	1672	20	57	0	0	A_44_P213336	A_44_P213336	11322.4	323.427	4.294263e+002	4.315137e+001	463	58	1.214870e+001	0	0	0	0	0	0	381.946	1	1	57.5363	61.1818
DATA	1673	20	58	0	0	A_42_P507072	FQ213070	11346.9	323.722	4.686617e+003	4.686810e+002	4191.5	59	1.230597e+001	0	0	0	0	0	0	4151.88	1	1	47.8731	61.7027
DATA	1674	20	59	0	0	A_44_P428886	NM_001099516	11372.6	323.716	3.743818e+002	3.768140e+001	417	65	1.274696e+001	0	0	0	0	0	0	330.25	1	1	46.5243	63.9722
DATA	1675	20	60	0	0	A_64_P086784	NM_001108657	11398.5	323.5	3.912034e+003	3.912269e+002	3341.5	67	1.703492e+001	0	0	0	0	0	0	3435.82	1	1	57.5363	66.5333
DATA	1676	20	61	0	0	A_42_P654682	NM_012724	11423.7	323.5	1.230072e+001	4.483331e+000	97	61.5	1.467060e+001	0	0	0	0	0	0	10.758	1	0	65	62.5294
DATA	1677	20	62	0	0	A_44_P443008	NM_001013068	11449.3	323.5	6.161002e+002	6.176197e+001	612	63	1.306399e+001	0	0	0	0	0	0	536.518	1	1	57.5363	62.4333
DATA	1678	20	63	0	0	A_64_P027229	A_64_P027229	11474.2	324.164	1.084519e+003	1.085390e+002	1032	60.5	1.098212e+001	0	0	0	0	0	0	940.649	1	1	46.1809	60.6176
DATA	1679	20	64	0	0	A_64_P134277	ENSRNOT00000029167	11500.1	323.5	7.804365e+001	8.942934e+000	152	68	1.877789e+001	0	0	0	0	0	0	67.3894	1	1	56.9804	72.2667
DATA	1680	20	65	0	0	A_64_P165548	XM_001055860	11525.5	323.5	9.695478e+001	1.064102e+001	166	69.5	1.611945e+001	0	0	0	0	0	0	83.3673	1	1	57.5363	69.4773
DATA	1681	20	66	0	0	A_64_P014737	NM_001000069	11550.7	323.5	2.041623e+001	4.853568e+000	101	68	1.306112e+001	0	0	0	0	0	0	17.4825	1	0	57.5363	65.697
DATA	1682	20	67	0	0	A_42_P627330	NM_001106628	11575.2	323.656	6.716036e+002	6.730570e+001	636	67.5	1.504843e+001	0	0	0	0	0	0	572.827	1	1	45.4864	70.6
DATA	1683	20	68	0	0	A_64_P039452	NM_001109063	11600.9	324.033	2.969008e+002	3.002005e+001	335	64.5	1.339510e+001	0	0	0	0	0	0	252.207	1	1	44.0646	64.4
DATA	1684	20	69	0	0	A_44_P516885	ENSRNOT00000005601	11626.9	323.5	5.384504e+004	5.384506e+003	44212	62	1.284614e+001	0	0	0	0	0	0	45545.8	1	1	56.9804	63.4063
DATA	1685	20	70	0	0	A_44_P839176	NM_001107114	11652	324.281	2.315278e+003	2.315710e+002	2037	60	1.167491e+001	0	0	0	0	0	0	1951.09	1	1	45.4864	60.4884
DATA	1686	20	71	0	0	A_64_P083342	AABR03026150	11677	324.125	3.554641e+001	5.728056e+000	110	67	1.156690e+001	0	0	0	0	0	0	29.8396	1	1	46.8651	67.3103
DATA	1687	20	72	0	0	A_42_P618185	NM_001108486	11702.5	324.147	3.934652e+003	3.934910e+002	3287	69.5	8.535132e+000	0	0	0	0	0	0	3290.35	1	1	46.8651	69.0909
DATA	1688	20	73	0	0	A_42_P619957	NM_053830	11728.5	323.5	2.579654e+002	2.619070e+001	298	70	1.490684e+001	0	0	0	0	0	0	214.875	1	1	65	71.7059
DATA	1689	20	74	0	0	A_44_P375042	NM_001014243	11753	324.242	4.369097e+002	4.392640e+001	439	71.5	1.716728e+001	0	0	0	0	0	0	362.725	1	1	45.4864	71.95
DATA	1690	20	75	0	0	A_44_P438053	NM_001004201	11778.3	323.952	1.342349e+002	1.417619e+001	192.5	73	2.210702e+001	0	0	0	0	0	0	111.047	1	1	45.1352	74.6471
DATA	1691	20	76	0	0	A_43_P19181	ENSRNOT00000018440	11804.6	323.573	1.285759e+002	1.364702e+001	190	66.5	1.204725e+001	0	0	0	0	0	0	105.986	1	1	57.5363	64.1071
DATA	1692	20	77	0	0	A_42_P664259	NM_024396	11829.2	323.8	5.104845e+004	5.104847e+003	41699	61.5	1.122313e+001	0	0	0	0	0	0	41949.6	1	1	51.4001	61.2
DATA	1693	20	78	0	0	A_44_P588645	FQ230244	11855.5	323.964	1.717494e+002	1.778105e+001	220	68	1.312843e+001	0	0	0	0	0	0	140.691	1	1	42.2201	69
DATA	1694	20	79	0	0	A_64_P030844	XM_001065657	11880.9	323.5	2.059594e+001	5.055546e+000	97	58.5	1.348745e+001	0	0	0	0	0	0	16.8201	1	0	65	61.5417
DATA	1695	20	80	0	0	A_64_P054823	A_64_P054823	11905.5	324.257	1.412619e+004	1.412627e+003	11368	61	8.779259e+000	0	0	0	0	0	0	11507.4	1	1	47.2035	60.6944
DATA	1696	20	81	0	0	A_42_P516860	XM_001059330	11931.6	323.573	1.082641e+002	1.177952e+001	168	58.5	1.056159e+001	0	0	0	0	0	0	87.9444	1	1	57.5363	58.7059
DATA	1697	20	82	0	0	A_64_P085772	NM_001191606	11957.1	323.5	1.273152e+002	1.355519e+001	188	55.5	9.850085e+000	0	0	0	0	0	0	103.167	1	1	56.9804	55.9474
DATA	1698	20	83	66	1	DarkCorner	DarkCorner	11982.4	324	4.863864e+000	4.688174e+000	84	59.5	1.205490e+001	0	0	0	0	0	0	3.93309	1	0	50.4627	59.3
DATA	1699	20	84	66	1	DarkCorner	DarkCorner	12007.5	324.708	4.687155e+000	4.671387e+000	75	58	1.293098e+001	0	0	0	0	0	0	-5.65937	0	0	39.4933	58.0909
DATA	1700	20	85	66	1	DarkCorner	DarkCorner	12033.4	323.573	4.696944e+000	4.683287e+000	79	52	1.151537e+001	0	0	0	0	0	0	1.14129	0	0	57.5363	53.0971
DATA	1701	21	1	66	1	DarkCorner	DarkCorner	9887.82	329.368	4.100975e+000	4.087179e+000	76	49	1.139921e+001	0	0	0	0	0	0	-5.29709	0	0	42.9674	49.4531
DATA	1702	21	2	66	1	DarkCorner	DarkCorner	9913.42	329.911	4.082866e+000	4.069131e+000	75	52.5	1.337746e+001	0	0	0	0	0	0	-6.68762	0	0	37.4241	55.2059
DATA	1703	21	3	66	1	DarkCorner	DarkCorner	9938.5	330.352	4.066025e+000	4.052347e+000	76.5	60	1.025176e+001	0	0	0	0	0	0	-4.33431	0	0	57.5363	60.2069
DATA	1704	21	4	0	0	A_44_P277669	NM_001163736	9962.94	330.538	7.123040e+002	7.134471e+001	761	56	1.117069e+001	0	0	0	0	0	0	665.304	1	1	44.7812	56.9412
DATA	1705	21	5	0	0	A_42_P788480	NM_019194	9988.62	330.577	7.709441e+003	7.709546e+002	7042.5	63.5	9.785782e+000	0	0	0	0	0	0	7228.08	1	1	50.1463	64.1923
DATA	1706	21	6	0	0	A_42_P558354	NM_001007686	10013.6	330.64	3.513587e+003	3.513815e+002	3262.5	56	9.992020e+000	0	0	0	0	0	0	3305.77	1	1	48.8603	56.0741
DATA	1707	21	7	0	0	A_44_P714409	NM_001047907	10039.5	330.747	3.802531e+003	3.802740e+002	3666	53	9.779675e+000	0	0	0	0	0	0	3589.91	1	1	49.1849	52.7273
DATA	1708	21	8	0	0	A_42_P604331	NM_001108533	10064.6	330.667	9.853394e+004	9.853395e+003	93068	64	1.257060e+001	0	0	0	0	0	0	93314	1	1	51.0895	62.4074
DATA	1709	21	9	0	0	A_64_P139472	NM_173119	10090.2	330.478	4.338185e+003	4.338367e+002	4099	53	1.345010e+001	0	0	0	0	0	0	4120.55	1	1	47.2035	55.697
DATA	1710	21	10	0	0	A_42_P711589	NM_022948	10115.4	330.389	7.088419e+003	7.088530e+002	6511	59	1.883556e+001	0	0	0	0	0	0	6751.21	1	1	47.8731	64.6129
DATA	1711	21	11	0	0	A_42_P813567	NM_031841	10141.6	330.427	1.037875e+005	1.037875e+004	99753	68	1.558142e+001	0	0	0	0	0	0	99112.2	1	1	57.5363	67.069
DATA	1712	21	12	0	0	A_42_P647505	TC640289	10166.5	330.581	3.450073e+003	3.450298e+002	3284	56	8.335699e+000	0	0	0	0	0	0	3302.39	1	1	49.1849	56.25
DATA	1713	21	13	0	0	A_64_P094313	NM_032073	10191.8	330.806	8.973854e+002	8.982458e+001	942	61	1.286047e+001	0	0	0	0	0	0	860.858	1	1	47.5395	62.0345
DATA	1714	21	14	0	0	A_42_P577421	NM_001106819	10216.7	330.9	4.908580e+002	4.924231e+001	532	63	1.602330e+001	0	0	0	0	0	0	471.797	1	1	47.2035	67.3939
DATA	1715	21	15	0	0	A_42_P477311	NM_001013170	10242.5	330.738	1.173201e+004	1.173208e+003	11097	65	1.311392e+001	0	0	0	0	0	0	11296.6	1	1	50.7771	63.2857
DATA	1716	21	16	0	0	A_42_P630249	NM_031824	10267.7	331.167	2.743847e+003	2.744126e+002	2639	61	1.237179e+001	0	0	0	0	0	0	2646.32	1	1	45.835	62.9091
DATA	1717	21	17	0	0	A_42_P618256	NM_001024759	10293.9	330.5	8.019214e+002	8.028713e+001	857	64	1.465817e+001	0	0	0	0	0	0	774.447	1	1	56.9804	64.9474
DATA	1718	21	18	0	0	A_64_P101584	A_64_P101584	10319.4	330.427	3.854173e+002	3.873852e+001	453	68.5	2.137385e+001	0	0	0	0	0	0	372.652	1	1	57.5363	70.3529
DATA	1719	21	19	0	0	A_64_P045461	NM_001106750	10344.6	330.427	2.035297e+002	2.072249e+001	277.5	70.5	1.702128e+001	0	0	0	0	0	0	196.982	1	1	57.5363	70
DATA	1720	21	20	0	0	A_64_P056485	ENSRNOT00000033663	10370.1	330.5	1.718849e+003	1.719290e+002	1686	70	1.514050e+001	0	0	0	0	0	0	1664.91	1	1	56.9804	71.1212
DATA	1721	21	21	0	0	A_64_P013077	A_64_P013077	10395.5	330.5	6.844032e+001	7.872464e+000	149	75	2.324263e+001	0	0	0	0	0	0	66.3327	1	1	57.5363	78.8718
DATA	1722	21	22	0	0	A_44_P348952	NM_001000368	10420.7	330.5	3.901881e+000	3.890978e+000	81	71	1.495738e+001	0	0	0	0	0	0	1.27521	0	0	65	70.84
DATA	1723	21	23	0	0	A_64_P147609	NM_001106295	10445.6	330.873	6.322668e+003	6.322787e+002	6192	70	1.124449e+001	0	0	0	0	0	0	6132.23	1	1	47.5395	67.5294
DATA	1724	21	24	0	0	A_44_P193928	NM_183328	10470.7	330.9	1.430062e+003	1.430590e+002	1425	69	1.570281e+001	0	0	0	0	0	0	1387.06	1	1	47.2035	72.4474
DATA	1725	21	25	0	0	A_44_P441947	XM_001079870	10496.4	330.638	1.441482e+003	1.442006e+002	1497	69	1.857702e+001	0	0	0	0	0	0	1397.89	1	1	47.5395	73.9286
DATA	1726	21	26	0	0	A_42_P666259	NM_001009661	10521.7	330.361	1.294795e+004	1.294801e+003	12129	65	1.655043e+001	0	0	0	0	0	0	12551.8	1	1	48.2044	68.8
DATA	1727	21	27	0	0	A_64_P082486	A_64_P082486	10547.2	330.588	1.214635e+003	1.215259e+002	1236.5	68	1.354922e+001	0	0	0	0	0	0	1176.92	1	1	46.5243	69.1163
DATA	1728	21	28	0	0	A_64_P091940	NM_033237	10573.3	330.5	2.187663e+002	2.222052e+001	303.5	70.5	2.049150e+001	0	0	0	0	0	0	211.821	1	1	57.5363	75.6923
DATA	1729	21	29	0	0	A_64_P144899	NM_001107736	10597.7	331.167	5.120310e+002	5.135119e+001	576	72	1.534070e+001	0	0	0	0	0	0	495.418	1	1	45.835	70.4737
DATA	1730	21	30	0	0	A_44_P410062	XM_224553	10623.4	331.265	3.672747e+002	3.693406e+001	437	66	1.743249e+001	0	0	0	0	0	0	354.995	1	1	46.5243	66.0345
DATA	1731	21	31	0	0	A_42_P489764	NM_001004099	10648.4	331	1.157847e+004	1.157853e+003	10863	68	1.409792e+001	0	0	0	0	0	0	11177.7	1	1	48.5334	66.5862
DATA	1732	21	32	0	0	A_42_P640277	NM_001003401	10674	331.116	3.863277e+004	3.863279e+003	35826	76	1.601392e+001	0	0	0	0	0	0	37244.7	1	1	46.8651	77.625
DATA	1733	21	33	0	0	A_44_P212850	NM_019305	10700.3	330.5	5.125499e+001	6.451289e+000	131	70	1.587016e+001	0	0	0	0	0	0	49.3299	1	1	65	70.8378
DATA	1734	21	34	0	0	A_64_P125506	NM_021677	10725.4	331.081	2.906310e+002	2.932679e+001	369	81	2.394110e+001	0	0	0	0	1	0	279.274	1	1	44.0646	87.2813
DATA	1735	21	35	0	0	A_42_P802358	NM_001024341	10750	330.657	1.401084e+004	1.401089e+003	12957	58.5	1.738870e+001	0	0	0	0	0	0	13438.2	1	1	45.4864	60.1053
DATA	1736	21	36	0	0	A_44_P552852	XM_346367	10777.5	330.766	1.017719e+002	1.091314e+001	166	61	1.482687e+001	0	0	0	0	0	0	97.4023	1	1	39.0882	59.1698
DATA	1738	21	38	0	0	A_64_P141187	NM_001108899	10827.3	330.5	9.540360e+000	4.070608e+000	90.5	69	1.819679e+001	0	0	0	0	0	0	9.09032	1	0	57.5363	66.4167
DATA	1739	21	39	0	0	A_44_P274823	NM_001105831	10851.8	331.167	2.747585e+003	2.747871e+002	2654	52	1.149446e+001	0	0	0	0	0	0	2612.12	1	1	47.8731	52.7714
DATA	1740	21	40	0	0	A_42_P804913	ENSRNOT00000022886	10877.9	330.5	1.105691e+002	1.175044e+001	189.5	53	1.425942e+001	0	0	0	1	0	0	104.826	1	1	56.9804	57.2581
DATA	1741	21	41	0	0	A_64_P113970	NM_212501	10902.5	330.507	3.149350e+003	3.149603e+002	2970.5	58.5	1.492301e+001	0	0	0	0	0	0	2977.93	1	1	49.1849	59.0294
DATA	1742	21	42	1028	1	(+)E1A_r60_3	E1A_r60_3	10929.2	330.277	5.166072e+001	6.533457e+000	131	67	1.398859e+001	0	0	0	0	0	0	48.7009	1	1	45.4864	66.8039
DATA	1743	21	43	0	0	A_42_P661992	TC596141	10954.1	330.5	1.510647e+002	1.562996e+001	225.5	75	2.261477e+001	0	0	0	0	0	0	142	1	1	56.9804	76.1935
DATA	1744	21	44	0	0	A_42_P577431	NM_001109422	10979.5	330.5	1.385583e+002	1.442824e+001	212	70	1.786448e+001	0	0	0	0	0	0	129.842	1	1	57.5363	73.1622
DATA	1745	21	45	0	0	A_44_P524785	NM_001000184	11004.7	330.5	4.050129e+000	4.047421e+000	82	69	1.585835e+001	0	0	0	0	0	0	2.77496	0	0	57.5363	68.7778
DATA	1746	21	46	0	0	A_64_P027634	NM_001000223	11030.1	330.969	5.116032e+001	6.524777e+000	130.5	74	1.837488e+001	0	0	0	0	0	0	47.6356	1	1	46.8651	72.3333
DATA	1747	21	47	0	0	A_42_P492976	NM_001126099	11055.6	330.573	3.089460e+002	3.116072e+001	366.5	73	1.655093e+001	0	0	0	0	0	0	286.652	1	1	57.5363	73
DATA	1748	21	48	0	0	A_64_P157479	AABR03127998	11080.2	331.065	9.527752e+003	9.527839e+002	8696	62	1.390268e+001	0	0	0	0	0	0	8810.93	1	1	45.4864	65.6071
DATA	1749	21	49	0	0	A_44_P391706	NM_001007796	11105.8	330.776	2.640396e+002	2.671922e+001	331	57	1.175828e+001	0	0	0	0	0	0	243.274	1	1	46.1809	57.5
DATA	1750	21	50	0	0	A_44_P184685	NM_001007735	11131.7	330.5	1.301020e+002	1.364337e+001	206	59.5	1.125134e+001	0	0	0	0	0	0	119.413	1	1	57.5363	57.7941
DATA	1751	21	51	0	0	A_44_P475275	NM_001000893	11156.8	330.938	7.737950e+001	8.767905e+000	152	59	8.651679e+000	0	0	0	0	0	0	70.7626	1	1	45.835	59.8718
DATA	1752	21	52	0	0	A_44_P270056	NM_001007800	11182	331.108	1.713605e+002	1.762878e+001	239	59	9.696139e+000	0	0	0	0	0	0	156.115	1	1	46.1809	57.7188
DATA	1753	21	53	0	0	A_64_P059351	NM_001145175	11208	330.545	1.254151e+002	1.321216e+001	195	57	1.027077e+001	0	0	0	0	0	0	113.786	1	1	55.8519	59.6364
DATA	1754	21	54	0	0	A_42_P573441	NM_001105742	11232.8	331.282	8.310842e+003	8.310946e+002	7299	60	1.035523e+001	0	0	0	0	0	0	7511.97	1	1	47.2035	62
DATA	1755	21	55	0	0	A_42_P485589	NM_017246	11258	331.164	1.133913e+002	1.208796e+001	181	69	1.418016e+001	0	0	0	0	0	0	102.079	1	1	46.8651	69
DATA	1756	21	56	0	0	A_44_P149540	XM_223051	11283.6	331.29	1.953138e+004	1.953143e+003	17542	61	1.259023e+001	0	0	0	0	0	0	17511.1	1	1	46.8651	62.7742
DATA	1757	21	57	0	0	A_44_P323236	NM_001000513	11309.2	330.51	1.707760e+001	4.556032e+000	93	61	1.166142e+001	0	0	0	0	0	0	15.2449	1	0	39.8942	63.3636
DATA	1759	21	59	0	0	A_64_P100447	NM_001173469	11359.9	330.631	1.628410e+001	4.559858e+000	96	60	1.273505e+001	0	0	0	0	0	0	14.416	1	0	45.1352	61.6286
DATA	1760	21	60	0	0	A_64_P150008	A_64_P150008	11385.6	330.573	8.436793e+001	9.459181e+000	156	66	9.825028e+000	0	0	0	0	0	0	74.37	1	1	57.5363	63.7419
DATA	1761	21	61	0	0	A_42_P481696	NM_022508	11410.4	331.265	2.914494e+003	2.914811e+002	2663	60.5	1.843192e+001	0	0	0	0	0	0	2558.9	1	1	46.5243	66.5833
DATA	1762	21	62	0	0	A_64_P033755	AABR03073220	11436.5	330.648	1.369656e+002	1.435986e+001	204	64	1.377441e+001	0	0	0	0	0	0	119.715	1	1	57.5363	62.6486
DATA	1763	21	63	0	0	A_64_P115980	NM_001109458	11461.9	330.614	3.104979e+002	3.135056e+001	356.5	61	1.355131e+001	0	0	0	0	0	0	270.24	1	1	57.259	62.027
DATA	1764	21	64	0	0	A_64_P001426	NM_001126301	11486.7	331.357	2.812524e+002	2.845958e+001	333	65	1.852223e+001	0	0	0	0	0	0	243.817	1	1	46.8651	69.8889
DATA	1765	21	65	0	0	A_64_P012987	NM_001108668	11512.1	331.328	2.308454e+003	2.308867e+002	2018.5	73	1.582748e+001	0	0	0	0	0	0	1992.78	1	1	45.1352	73.6591
DATA	1767	21	67	0	0	A_42_P668289	TC585832	11562.7	331.167	3.524200e+003	3.524475e+002	3060	68	1.451481e+001	0	0	0	0	0	0	3017	1	1	45.835	70.5862
DATA	1768	21	68	0	0	A_64_P052690	ENSRNOT00000036634	11588.4	331.288	6.782666e+002	6.797069e+001	654.5	65	1.216548e+001	0	0	0	0	0	0	578.263	1	1	45.835	66.4688
DATA	1769	21	69	0	0	A_42_P593020	NM_013413	11614.4	330.573	7.124578e+001	8.395772e+000	140.5	61.5	1.330707e+001	0	0	0	0	0	0	60.4795	1	1	57.5363	62.0526
DATA	1770	21	70	0	0	A_64_P037303	NM_001127530	11638.6	331.09	1.153115e+003	1.153976e+002	1032	64	8.498937e+000	0	0	0	0	0	0	975.258	1	1	46.1809	64.9429
DATA	1771	21	71	0	0	A_44_P684180	NM_001037363	11664.4	331.29	5.776841e+003	5.777015e+002	4834	62	1.223621e+001	0	0	0	0	0	0	4866.58	1	1	46.8651	63.4839
DATA	1772	21	72	0	0	A_64_P104743	NM_133518	11690.5	330.648	1.632101e+002	1.692846e+001	216	69	9.379387e+000	0	0	0	0	0	0	136.931	1	1	65	68.5172
DATA	1773	21	73	0	0	A_44_P941132	NM_001108128	11714.8	330.781	6.459158e+003	6.459315e+002	5288	69	1.303918e+001	0	0	0	0	0	0	5399.87	1	1	48.2044	69.9231
DATA	1774	21	74	0	0	A_44_P187080	NM_001110823	11740.4	331.099	2.420125e+004	2.420130e+003	19411	67	1.795108e+001	0	0	0	0	0	0	20159.2	1	1	47.8731	72.2069
DATA	1775	21	75	0	0	A_42_P574960	ENSRNOT00000068719	11766	331.164	9.620206e+002	9.630925e+001	880	68	1.550469e+001	0	0	0	0	0	0	798.495	1	1	46.8651	67.1333
DATA	1776	21	76	0	0	A_64_P094850	A_64_P094850	11791.9	331.029	7.885204e+001	9.108204e+000	147.5	71	1.414166e+001	0	0	0	0	0	0	65.2177	1	1	46.8651	70.8857
DATA	1777	21	77	0	0	A_43_P13418	NM_172042	11816.7	331.091	7.062412e+003	7.062560e+002	5897	68	1.508505e+001	0	0	0	0	0	0	5822.54	1	1	49.1849	68.4
DATA	1778	21	78	66	-1	(-)3xSLv1	NegativeControl	11842.5	331	4.603835e+000	4.588348e+000	81	68	1.210707e+001	0	0	0	0	0	0	-1.39082	0	0	65	68.5
DATA	1779	21	79	0	0	A_44_P321594	ENSRNOT00000006966	11868.5	331	4.017996e+001	6.109645e+000	116.5	64	1.404833e+001	0	0	0	0	0	0	32.9167	1	1	65	65.0882
DATA	1780	21	80	0	0	A_44_P792531	NM_001025700	11893	331.153	2.595249e+002	2.635965e+001	295	57	9.429803e+000	0	0	0	0	0	0	212.033	1	1	46.8651	57.7241
DATA	1781	21	81	0	0	A_43_P14795	NM_001044248	11918.9	330.988	1.769161e+003	1.769766e+002	1451	61	9.994330e+000	0	0	0	0	0	0	1441.38	1	1	50.7771	59.5385
DATA	1782	21	82	0	0	A_42_P671502	NM_053467	11943.7	330.9	7.108125e+003	7.108277e+002	5623	58	9.909438e+000	0	0	0	0	0	0	5776.89	1	1	47.2035	56.5
DATA	1783	21	83	66	1	DarkCorner	DarkCorner	11969.5	331	4.666012e+000	4.652503e+000	85	60	1.154480e+001	0	0	0	0	0	0	1.15682	0	0	54.1152	56.8372
DATA	1784	21	84	66	1	DarkCorner	DarkCorner	11995.5	331	4.676145e+000	4.660414e+000	79	60	1.650054e+001	0	0	0	0	0	0	-3.98506	0	0	54.1152	60.037
DATA	1785	21	85	66	1	DarkCorner	DarkCorner	12020.5	331	4.684921e+000	4.669161e+000	81.5	57	9.446393e+000	0	0	0	0	0	0	-0.00155497	0	0	54.1152	55.7556
DATA	1786	22	1	66	1	DarkCorner	DarkCorner	9900.42	337.573	4.087174e+000	4.073424e+000	78	49	9.186452e+000	0	0	0	0	0	0	-3.05716	0	0	57.5363	49.5333
DATA	1787	22	2	66	1	DarkCorner	DarkCorner	9925.58	337.573	4.070163e+000	4.056471e+000	71	55.5	1.050372e+001	0	0	0	0	0	0	-7.5553	0	0	57.5363	54.4286
DATA	1788	22	3	66	1	DarkCorner	DarkCorner	9951.11	337.5	4.053797e+000	4.040159e+000	71	54	1.168936e+001	0	0	0	0	0	0	-9.20532	0	0	65	54.1111
DATA	1789	22	4	0	0	A_42_P704824	NM_001009640	9976.5	337.5	2.599587e+002	2.630559e+001	315	57	9.821343e+000	0	0	0	1	0	0	243.542	1	1	57.5363	58.7727
DATA	1790	22	5	0	0	A_42_P517554	NM_001107060	10001.9	337.5	1.816578e+002	1.860313e+001	252	58.5	1.130499e+001	0	0	0	0	0	0	170.805	1	1	65	59.6071
DATA	1791	22	6	0	0	A_42_P586883	NM_001106416	10027.4	337.573	5.993760e+001	7.203827e+000	130	57	1.114453e+001	0	0	0	0	0	0	56.5527	1	1	65	55.2647
DATA	1792	22	7	0	0	A_64_P060302	BF559343	10052.6	337.573	3.312046e+002	3.335914e+001	397	54	1.255986e+001	0	0	0	0	0	0	313.507	1	1	57.5363	56.4
DATA	1793	22	8	0	0	A_64_P055418	NM_001025641	10078.1	337.5	3.984659e+000	3.991000e+000	86	57	1.222531e+001	0	0	0	0	0	0	3.76469	0	0	56.9804	58.3793
DATA	1794	22	9	0	0	A_44_P317600	NM_012612	10103.5	337.5	5.449361e+002	5.463730e+001	588.5	54	1.236354e+001	0	0	0	0	0	0	518.876	1	1	57.5363	55.2857
DATA	1795	22	10	0	0	A_44_P433359	NM_022710	10128.7	337.5	3.504564e+002	3.526749e+001	415	62	1.503173e+001	0	0	0	0	0	0	334.577	1	1	57.5363	62.6
DATA	1796	22	11	0	0	A_42_P788480	NM_019194	10153.6	338.232	7.566720e+003	7.566822e+002	7102	56	9.500796e+000	0	0	0	0	0	0	7242.1	1	1	46.8651	56.1563
DATA	1797	22	12	0	0	A_44_P269808	NM_001025281	10179.6	337.573	8.006420e+001	8.919297e+000	164.5	56	7.511854e+000	0	0	0	0	0	0	76.8006	1	1	57.5363	55.1935
DATA	1798	22	13	0	0	A_64_P108165	NM_001108889	10205	337.545	1.136955e+001	4.084118e+000	91	59.5	7.868484e+000	0	0	0	0	0	0	10.9287	1	0	65	60
DATA	1799	22	14	0	0	A_42_P581567	NM_001011899	10230.4	337.573	1.783301e+002	1.825776e+001	259	67	1.534542e+001	0	0	0	0	0	0	171.737	1	1	65	67.2273
DATA	1800	22	15	0	0	A_42_P746029	NM_144748	10255.6	337.573	2.040633e+001	4.409415e+000	101	61	1.128567e+001	0	0	0	0	0	0	19.6846	1	1	65	62.5405
DATA	1801	22	16	0	0	A_42_P481087	XM_232226	10280.4	338.265	1.484207e+003	1.484720e+002	1485	57	1.298302e+001	0	0	0	0	0	0	1433.93	1	1	46.5243	59.3846
DATA	1802	22	17	0	0	A_64_P031020	ENSRNOT00000032728	10306.6	337.573	5.447395e+000	3.935825e+000	86	61	1.588940e+001	0	0	0	0	0	0	5.26937	1	0	57.5363	63.5
DATA	1803	22	18	0	0	A_44_P344228	NM_183051	10332	337.545	3.390520e+001	5.162995e+000	114	66.5	1.698424e+001	0	0	0	0	0	0	32.8329	1	1	55.8519	66.5333
DATA	1804	22	19	0	0	A_64_P009798	NM_021742	10357.4	337.573	1.243254e+001	4.084012e+000	90	66	1.689019e+001	0	0	0	0	0	0	12.0503	1	0	65	66.5833
DATA	1805	22	20	0	0	A_44_P775747	ENSRNOT00000051510	10382	338.277	2.690713e+004	2.690715e+003	26964.5	71	1.885236e+001	0	0	0	0	0	0	26100.4	1	1	45.4864	73.8214
DATA	1806	22	21	0	0	A_44_P349475	NM_031333	10407.6	338.211	9.964650e+002	9.972221e+001	1021	71	2.482736e+001	0	0	0	0	0	0	967.091	1	1	47.5395	79.0909
DATA	1807	22	22	0	0	A_64_P114198	NM_001080153	10433.1	338.229	2.295713e+003	2.296041e+002	2217	67.5	1.201930e+001	0	0	0	0	0	0	2228.79	1	1	46.5243	66.2222
DATA	1808	22	23	0	0	A_42_P719060	NM_001108994	10459	337.545	3.099198e+003	3.099441e+002	2919	71	1.065358e+001	0	0	0	0	0	0	3008.99	1	1	55.8519	69.5333
DATA	1809	22	24	0	0	A_44_P163243	NM_175759	10484.4	337.573	3.896857e+000	3.883748e+000	78	69	2.370425e+001	0	0	0	0	0	0	-1.64635	0	0	57.5363	77.425
DATA	1810	22	25	0	0	A_44_P156864	A_44_P156864	10509.6	337.573	1.011848e+002	1.083853e+001	183	71	1.351100e+001	0	0	0	0	0	0	98.2138	1	1	65	72.0667
DATA	1811	22	26	0	0	A_42_P758052	NM_001031645	10534.1	337.896	4.975622e+003	4.975773e+002	4796	70	1.545452e+001	0	0	0	0	0	0	4827.89	1	1	46.8651	70.8649
DATA	1812	22	27	0	0	A_44_P280659	NM_001100971	10560.5	337.648	6.494474e+001	7.569558e+000	150	68	1.508410e+001	0	0	0	0	0	0	62.9758	1	1	57.5363	68.8889
DATA	1813	22	28	0	0	A_42_P768380	NM_001100158	10585.3	338.167	6.529621e+003	6.529736e+002	6321	69.5	1.367185e+001	0	0	0	0	0	0	6327.46	1	1	45.835	69.6667
DATA	1814	22	29	0	0	A_44_P486312	NM_144737	10610.2	338.406	6.514161e+002	6.525792e+001	699	63.5	1.808244e+001	0	0	0	0	0	0	630.695	1	1	46.5243	67.8438
DATA	1815	22	30	0	0	A_64_P005288	XM_575125	10636.6	337.573	1.010598e+002	1.083219e+001	181	61	1.622804e+001	0	0	0	0	0	0	97.7201	1	1	65	65.3571
DATA	1816	22	31	0	0	A_64_P101885	ENSRNOT00000058341	10662.1	337.614	1.938146e+002	1.977082e+001	278	67	2.295301e+001	0	0	0	0	0	0	187.17	1	1	57.259	71.9259
DATA	1817	22	32	0	0	A_64_P113645	ENSRNOT00000055538	10687.5	337.648	3.923228e+000	3.914672e+000	83	70.5	1.678647e+001	0	0	0	0	0	0	1.83791	0	0	57.5363	73.7083
DATA	1818	22	33	0	0	A_42_P588869	NM_001008348	10711.9	338.273	3.917397e+003	3.917592e+002	3705.5	72.5	1.650159e+001	0	0	0	0	0	0	3772.24	1	1	45.835	73.9583
DATA	1819	22	34	0	0	A_64_P028027	NM_001000473	10738.4	337.573	3.517178e+001	5.269061e+000	115	76	2.650457e+001	0	0	0	0	1	0	33.8023	1	1	57.5363	83.6774
DATA	1820	22	35	0	0	A_42_P468805	NM_145721	10762.8	338.323	4.342567e+002	4.360315e+001	485	61	1.392681e+001	0	0	0	0	0	0	416.631	1	1	45.4864	60.4127
DATA	1821	22	36	0	0	A_42_P522194	NM_012914	10788.3	338	1.615311e+002	1.662631e+001	234	64.5	2.147966e+001	0	0	0	0	0	0	154.645	1	1	47.2035	65.4524
DATA	1822	22	37	0	0	A_64_P002969	A_64_P002969	10814.5	338	1.439783e+001	4.201841e+000	97	68.5	2.041427e+001	0	0	0	0	0	0	13.7526	1	0	65	68.5
DATA	1823	22	38	0	0	A_42_P453935	NM_001198580	10838.7	338.219	6.001505e+003	6.001636e+002	5570.5	55	1.433463e+001	0	0	0	0	0	0	5719.86	1	1	48.2044	58.0333
DATA	1824	22	39	0	0	A_42_P523551	NM_001014087	10865.5	338	8.554194e+001	9.429205e+000	157	54.5	1.452246e+001	0	0	0	1	0	0	81.3097	1	1	54.1152	57.9762
DATA	1825	22	40	0	0	A_64_P046076	NM_053952	10889.8	338.171	1.608319e+003	1.608811e+002	1532	51	1.283540e+001	0	0	0	0	0	0	1524.94	1	1	48.5334	51.381
DATA	1826	22	41	0	0	A_42_P607770	NM_001134616	10915	338	1.078850e+004	1.078857e+003	9663	64.5	1.263944e+001	0	0	0	0	0	0	10200.8	1	1	46.8651	63.86
DATA	1827	22	42	0	0	A_64_P089400	NM_022605	10940.7	338.099	3.162611e+002	3.187799e+001	382.5	69	1.880910e+001	0	0	0	0	0	0	298.163	1	1	47.5395	69.7857
DATA	1828	22	43	0	0	A_64_P072064	FQ221714	10966	337.947	1.125519e+005	1.125519e+004	104804	76	1.986645e+001	0	0	0	0	0	0	105790	1	1	46.8651	76.1351
DATA	1829	22	44	0	0	A_42_P555125	NM_012913	10991.5	338.055	9.057564e+003	9.057653e+002	8076.5	75	1.980782e+001	0	0	0	0	0	0	8486.85	1	1	48.5334	79.7241
DATA	1830	22	45	0	0	A_42_P768776	NM_001108443	11016.7	338.12	5.236544e+003	5.236699e+002	4862	77	2.203313e+001	0	0	0	0	0	0	4890.9	1	1	48.8603	79.2727
DATA	1831	22	46	0	0	A_42_P593930	NM_001195606	11043	338	1.976713e+001	4.507723e+000	99	76	1.838087e+001	0	0	0	0	0	0	18.3978	1	0	54.9904	72.9722
DATA	1832	22	47	0	0	A_64_P013545	NM_001115046	11068.5	338	2.797641e+002	2.827023e+001	337.5	71	1.458862e+001	0	0	0	0	0	0	259.482	1	1	54.1152	70.1935
DATA	1833	22	48	0	0	A_42_P548520	NM_001100834	11093.5	338.188	5.317723e+003	5.317879e+002	4773	68	2.638266e+001	0	0	0	0	0	0	4915.15	1	1	49.8279	77.7308
DATA	1834	22	49	0	0	A_42_P692317	NM_001107565	11118.5	338	9.815546e+002	9.824080e+001	978	62	8.721489e+000	0	0	0	0	0	0	903.972	1	1	49.8279	59.9333
DATA	1835	22	50	0	0	A_64_P078303	NM_001106526	11144.5	338	4.358419e+001	5.990542e+000	122	57	1.113915e+001	0	0	0	0	0	0	39.9862	1	1	54.1152	56.5143
DATA	1836	22	51	0	0	A_64_P031771	A_64_P031771	11170	338	5.978989e+001	7.264208e+000	138	61.5	9.028405e+000	0	0	0	0	0	0	54.6448	1	1	54.9904	62.3125
DATA	1837	22	52	0	0	A_44_P393929	NM_001039713	11194.7	338.072	1.118656e+002	1.192845e+001	182.5	57.5	1.099575e+001	0	0	0	0	0	0	101.855	1	1	46.1809	57.4773
DATA	1838	22	53	0	0	A_44_P135730	XM_228802	11220.3	338.137	1.902932e+002	1.947821e+001	253	57	1.080549e+001	0	0	0	0	0	0	172.58	1	1	48.2044	58.5172
DATA	1839	22	54	0	0	A_43_P23215	NM_001025737	11245.4	338.257	1.858382e+002	1.904678e+001	250	65	1.162572e+001	0	0	0	0	0	0	167.878	1	1	48.2044	66.25
DATA	1840	22	55	0	0	A_64_P118427	A_64_P118427	11271.5	338	6.065975e+001	7.373298e+000	137.5	64	1.775854e+001	0	0	0	0	0	0	54.5666	1	1	65	66.9677
DATA	1841	22	56	0	0	A_64_P075560	NM_001037526	11295.7	338.169	2.008108e+001	4.662476e+000	98	61	8.496153e+000	0	0	0	0	0	0	17.9941	1	0	47.2035	61.7692
DATA	1842	22	57	0	0	A_64_P150311	NM_177935	11321.6	337.901	7.914935e+001	8.972435e+000	147	59	1.032609e+001	0	0	0	0	0	0	70.6207	1	1	47.8731	60.8537
DATA	1843	22	58	0	0	A_44_P272393	NM_001106892	11347.1	338.191	5.090606e+001	6.627291e+000	128.5	56	1.195671e+001	0	0	0	0	0	0	45.2333	1	1	46.1809	59.0857
DATA	1844	22	59	0	0	A_44_P421887	NM_001191565	11372.2	338.043	1.291571e+002	1.360049e+001	193	63.5	1.106133e+001	0	0	0	0	0	0	114.286	1	1	46.8651	62.5238
DATA	1845	22	60	0	0	A_64_P045102	A_64_P045102	11397.8	338.25	2.323642e+003	2.324036e+002	2190.5	60	1.050287e+001	0	0	0	0	0	0	2047.47	1	1	45.1352	60.8966
DATA	1846	22	61	0	0	A_42_P818546	NM_001191600	11423.6	338.404	1.082900e+003	1.083752e+002	1021	59	1.490504e+001	0	0	0	0	0	0	950.128	1	1	57.8122	61.0313
DATA	1847	22	62	0	0	A_42_P777445	ENSRNOT00000012684	11448.6	338.634	6.550147e+001	7.843799e+000	133.5	65	1.273803e+001	0	0	0	0	0	0	57.2345	1	1	47.8731	63.8667
DATA	1848	22	63	0	0	A_64_P111709	NM_001000554	11474.5	338.352	2.022607e+002	2.068521e+001	260	64	1.203138e+001	0	0	0	0	0	0	175.964	1	1	57.5363	63.0667
DATA	1849	22	64	0	0	A_64_P107509	NM_001191874	11500.1	338.386	9.991269e+001	1.089813e+001	171	68	1.765600e+001	0	0	0	0	0	0	86.5552	1	1	57.259	72.3514
DATA	1850	22	65	0	0	A_64_P121836	ENSRNOT00000007828	11525.5	338.352	5.424489e+001	6.966249e+000	130.5	71	1.358317e+001	0	0	0	0	0	0	46.7959	1	1	57.5363	71.4
DATA	1851	22	66	0	0	A_42_P684281	XR_008784	11550.6	338.427	2.411241e+003	2.411641e+002	2062	70	1.407346e+001	0	0	0	0	0	0	2071.63	1	1	57.5363	71.9355
DATA	1852	22	67	0	0	A_64_P060804	ENSRNOT00000000462	11576.4	338.427	4.847937e+001	6.551730e+000	121	74	1.771275e+001	0	0	0	0	0	0	41.4771	1	1	57.5363	76.6923
DATA	1853	22	68	0	0	A_64_P075675	A_64_P075675	11601.1	338.464	3.044651e+002	3.076632e+001	342.5	60	1.352581e+001	0	0	0	0	0	0	259.463	1	1	47.5395	62.9512
DATA	1854	22	69	0	0	A_44_P254973	NM_198051	11627	338.455	6.873354e+001	8.184189e+000	139	59	1.145297e+001	0	0	0	0	0	0	58.3342	1	1	55.8519	61.4722
DATA	1855	22	70	0	0	A_42_P492976	NM_001126099	11652.4	338.427	2.958488e+002	2.991923e+001	328	60.5	9.408124e+000	0	0	0	0	0	0	250.094	1	1	57.5363	62.0263
DATA	1856	22	71	0	0	A_42_P619114	NM_001014204	11677.4	338.542	8.022798e+001	9.187580e+000	149.5	68	1.075213e+001	0	0	0	0	0	0	67.5638	1	1	48.2044	65.7429
DATA	1857	22	72	0	0	A_42_P541625	NM_001126090	11702.4	338.5	2.335631e+004	2.335636e+003	19045	67	1.020955e+001	0	0	0	1	0	0	19595.9	1	1	48.5334	65.7879
DATA	1858	22	73	0	0	A_42_P469136	NM_001044288	11728.5	338.352	1.154644e+003	1.155525e+002	1035	72	1.628881e+001	0	0	0	1	0	0	965.027	1	1	57.5363	74.1282
DATA	1859	22	74	0	0	A_64_P101480	ENSRNOT00000034261	11754	338.455	7.147120e+001	8.460560e+000	138.5	66	1.543548e+001	0	0	0	0	0	0	59.52	1	1	55.8519	66.4333
DATA	1860	22	75	0	0	A_64_P078554	ENSRNOT00000020079	11778.5	338.353	3.776879e+002	3.804104e+001	394	73.5	1.271803e+001	0	0	0	0	0	0	313.465	1	1	46.5243	71.1
DATA	1861	22	76	0	0	A_44_P131067	ENSRNOT00000045483	11804.6	338.427	1.328861e+001	4.748451e+000	91	66	1.481250e+001	0	0	0	0	0	0	10.9911	1	0	65	66.5556
DATA	1862	22	77	0	0	A_64_P055699	ENSRNOT00000010871	11829.4	338.5	1.610927e+003	1.611576e+002	1386.5	68	9.974699e+000	0	0	0	0	0	0	1328.23	1	1	48.5334	66.8065
DATA	1863	22	78	0	0	A_64_P117203	NM_001106002	11854.6	338.74	1.372203e+004	1.372211e+003	10831.5	66	1.077964e+001	0	0	0	0	0	0	11279.9	1	1	49.5074	65.1563
DATA	1864	22	79	0	0	A_44_P357870	NM_031559	11880	338.387	5.220646e+002	5.240879e+001	506	65	1.441179e+001	0	0	0	0	0	0	427.853	1	1	50.7771	62.4595
DATA	1865	22	80	0	0	A_42_P732101	NM_022624	11905.6	338.74	7.769571e+003	7.769708e+002	6106	61	1.325434e+001	0	0	0	0	0	0	6350.16	1	1	49.5074	62
DATA	1866	22	81	0	0	A_64_P155054	XM_001062835	11931.6	338.427	6.475430e+001	7.958109e+000	136	62	1.172348e+001	0	0	0	0	0	0	52.7794	1	1	65	63.24
DATA	1867	22	82	0	0	A_44_P534154	NM_001108852	11956.2	339.041	7.469769e+001	8.791617e+000	140.5	59	1.142754e+001	0	0	0	0	0	0	60.7496	1	1	47.2035	57.5405
DATA	1868	22	83	66	1	DarkCorner	DarkCorner	11982.4	338.427	4.663301e+000	4.661859e+000	83	54	1.157518e+001	0	0	0	0	0	0	2.95449	0	0	65	54.8788
DATA	1869	22	84	66	1	DarkCorner	DarkCorner	12007.7	338.5	4.672600e+000	4.656881e+000	75	58	1.180697e+001	0	0	0	0	0	0	-6.80563	0	0	57.5363	57.7308
DATA	1870	22	85	66	1	DarkCorner	DarkCorner	12033.1	338.535	4.680998e+000	4.666562e+000	81.5	51.5	1.092150e+001	0	0	0	0	0	0	0.893851	0	0	47.8731	52.4558
DATA	1871	23	1	66	1	DarkCorner	DarkCorner	9887.5	344.648	4.091958e+000	4.079597e+000	84	48	1.055866e+001	0	0	0	0	0	0	0.989759	0	0	57.5363	48.7273
DATA	1872	23	2	66	1	DarkCorner	DarkCorner	9913.16	345.176	4.073924e+000	4.060219e+000	79	52	8.157111e+000	0	0	0	0	0	0	-3.74455	0	0	47.8731	51.3333
DATA	1873	23	3	66	1	DarkCorner	DarkCorner	9938.5	344.648	4.057584e+000	4.043934e+000	73	55	1.171030e+001	0	0	0	0	0	0	-8.65968	0	0	57.5363	54.1481
DATA	1874	23	4	0	0	A_44_P246268	NM_001106862	9962.78	345.22	2.996427e+001	5.020676e+000	113	57	9.288745e+000	0	0	0	0	0	0	28.0459	1	1	43.7019	57.6757
DATA	1875	23	5	0	0	A_64_P028396	ENSRNOT00000051835	9989.39	344.931	3.959777e+001	5.637683e+000	117.5	59	1.086697e+001	0	0	0	0	0	0	37.2061	1	1	53.8203	61.2632
DATA	1876	23	6	0	0	A_64_P020451	XM_219275	10014.5	345	3.132439e+001	5.079706e+000	112	58	1.285848e+001	0	0	0	0	0	0	29.5357	1	1	54.1152	56.5882
DATA	1878	23	8	0	0	A_64_P106264	ENSRNOT00000029671	10064.8	345.47	2.126568e+003	2.126940e+002	2146.5	54	1.249111e+001	0	0	0	0	0	0	2018.2	1	1	45.835	57.5278
DATA	1879	23	9	0	0	A_44_P524805	NM_214832	10090.9	345.271	1.497200e+001	4.234623e+000	95.5	52	1.444274e+001	0	0	0	0	0	0	14.2518	1	0	46.5243	55.0303
DATA	1880	23	10	0	0	A_42_P764228	NM_031707	10115.5	345	4.064853e+003	4.065045e+002	3851.5	56.5	1.787182e+001	0	0	0	0	0	0	3879.53	1	1	48.5334	61.8529
DATA	1881	23	11	0	0	A_44_P533760	NM_182843	10140.8	345.271	1.438762e+003	1.439301e+002	1422.5	58	1.396003e+001	0	0	0	0	0	0	1376.73	1	1	46.8651	58.4444
DATA	1882	23	12	0	0	A_42_P524610	NM_001108992	10166.4	345.027	2.621569e+003	2.621864e+002	2491	56	9.357697e+000	0	0	0	0	0	0	2514.47	1	1	48.5334	55.931
DATA	1883	23	13	0	0	A_42_P570756	NM_134345	10192.5	345	1.258988e+005	1.258988e+004	121468	60	1.103652e+001	0	0	0	0	0	0	121024	1	1	54.1152	60.7941
DATA	1884	23	14	0	0	A_44_P362969	NM_053688	10217	344.922	5.732314e+001	6.941662e+000	137	60	1.258313e+001	0	0	0	0	0	0	55.2082	1	1	47.5395	63.2941
DATA	1885	23	15	0	0	A_44_P308197	NM_001012190	10242.2	345.319	3.322991e+003	3.323221e+002	3204	65	1.546806e+001	0	0	0	0	0	0	3206.24	1	1	46.8651	68.8049
DATA	1886	23	16	0	1	ETG05_36762	ETG05_36762	10268.5	345	2.816555e+001	4.812035e+000	110	62	1.345961e+001	0	0	0	0	0	0	27.2194	1	1	54.1152	63.1951
DATA	1887	23	17	0	0	A_42_P744033	NM_001100846	10293.3	345.159	3.678342e+002	3.698920e+001	436	61	1.614431e+001	0	0	0	0	0	0	355.969	1	1	46.5243	62.75
DATA	1888	23	18	0	0	A_42_P726363	NM_031536	10319.6	345.281	2.296933e+001	4.518685e+000	104	59	1.214830e+001	0	0	0	0	0	0	22.2563	1	1	45.1352	60.5946
DATA	1889	23	19	0	0	A_64_P010393	NM_053363	10343.8	345.194	4.767528e+003	4.767686e+002	4458	67.5	1.668384e+001	0	0	0	0	0	0	4623.91	1	1	47.5395	67.1667
DATA	1890	23	20	0	0	A_42_P612220	NM_001191711	10370	345	9.849429e+002	9.857086e+001	1010	68	1.758939e+001	0	0	0	0	0	0	956.048	1	1	54.9904	66.7143
DATA	1891	23	21	0	0	A_44_P393551	NM_012567	10395.1	345.464	3.816685e+004	3.816687e+003	36544.5	72	1.865859e+001	0	0	0	0	0	0	37072.5	1	1	46.5243	73
DATA	1892	23	22	0	0	A_44_P278688	NM_053682	10420.3	345.493	1.816344e+003	1.816759e+002	1794	60	1.298652e+001	0	0	0	0	0	0	1765.03	1	1	45.835	61.3235
DATA	1893	23	23	0	0	A_44_P186989	NM_001000076	10446.5	345	9.841501e+000	4.002361e+000	90	64	1.346625e+001	0	0	0	0	0	0	9.5652	1	0	54.1152	64.8947
DATA	1894	23	24	0	0	A_42_P640277	NM_001003401	10470.9	345.439	3.754449e+004	3.754451e+003	35249	68	1.942480e+001	0	0	0	0	0	0	36494.9	1	1	45.1352	70.6389
DATA	1895	23	25	0	0	A_44_P398792	NM_053867	10496.2	345.143	1.421336e+004	1.421341e+003	13959	70	1.508204e+001	0	0	0	0	0	0	13813.8	1	1	45.1352	71.697
DATA	1896	23	26	0	0	A_64_P052552	ENSRNOT00000056797	10522.5	345	7.458018e+001	8.407364e+000	154.5	68	1.457368e+001	0	0	0	0	0	0	72.4589	1	1	54.1152	68.1765
DATA	1897	23	27	0	0	A_64_P119254	NM_001013202	10547.6	345.069	3.895881e+000	3.882775e+000	77	65	1.772081e+001	0	0	0	0	0	0	-3.84272	0	0	53.8203	67.8696
DATA	1898	23	28	0	0	A_64_P159614	NM_053614	10572.3	345.246	4.228563e+003	4.228741e+002	4145.5	65	1.283439e+001	0	0	0	0	0	0	4103.83	1	1	45.1352	66.1923
DATA	1899	23	29	0	0	A_42_P814107	NM_001024750	10598	345.3	1.569368e+002	1.616822e+001	232	62	1.749425e+001	0	0	0	0	0	0	152.18	1	1	49.8279	66.05
DATA	1900	23	30	0	0	A_64_P150751	NM_212494	10623.4	345.467	5.007159e+002	5.022265e+001	569	62	1.617289e+001	0	0	0	0	0	0	485.062	1	1	49.5074	65.2059
DATA	1902	23	32	0	0	A_44_P838888	ENSRNOT00000038829	10673.7	345.462	6.860638e+001	7.892636e+000	148	75	1.683911e+001	0	0	0	0	0	0	66.2959	1	1	45.835	75
DATA	1903	23	33	0	0	A_43_P12927	NM_053769	10700.4	345.427	3.256928e+002	3.280293e+001	391.5	70	2.103826e+001	0	0	0	0	0	0	314.223	1	1	57.5363	73.5429
DATA	1904	23	34	0	0	A_64_P140806	A_64_P140806	10724.6	345.239	2.895139e+004	2.895141e+003	27345	76	2.570742e+001	0	0	0	0	1	0	27886.6	1	1	46.5243	81.9394
DATA	1905	23	35	0	0	A_42_P607026	NM_001106839	10750.5	345.265	6.988112e+003	6.988222e+002	6547.5	70	2.356408e+001	0	0	0	0	0	0	6718.6	1	1	46.5243	74.8605
DATA	1906	23	36	0	0	A_44_P272186	NM_001107950	10777.3	345.813	3.388353e+001	5.188768e+000	117	60	1.737876e+001	0	0	0	0	0	0	32.5115	1	1	39.4933	63.25
DATA	1907	23	37	0	0	A_44_P226658	NM_017046	10801.6	345.427	5.230608e+001	6.547275e+000	130.5	66	2.670583e+001	0	0	0	0	0	0	50.0826	1	1	57.5363	71.5135
DATA	1908	23	38	0	0	A_64_P119279	NM_001108109	10826.4	345.556	1.363411e+004	1.363417e+003	12987	69	1.830645e+001	0	0	0	0	0	0	13025.8	1	1	48.2044	68.6154
DATA	1909	23	39	0	0	A_44_P1042876	NM_212504	10851.5	345.568	2.070639e+003	2.071016e+002	1985.5	54.5	1.315078e+001	0	0	0	0	0	0	1973.54	1	1	49.1849	56.8182
DATA	1910	23	40	0	0	A_64_P119607	ENSRNOT00000037601	10877.9	345.386	2.670296e+002	2.699598e+001	337.5	58	1.855764e+001	0	0	0	0	0	0	253.824	1	1	57.259	61.4688
DATA	1911	23	41	0	0	A_42_P784252	NM_133557	10902.5	345.5	1.390528e+004	1.390533e+003	12660.5	57	1.123922e+001	0	0	0	0	0	0	13183.5	1	1	49.1849	56.4848
DATA	1912	23	42	0	0	A_44_P1033194	NM_139328	10927.9	345.623	3.503168e+003	3.503395e+002	3295	66	1.481671e+001	0	0	0	0	0	0	3312.07	1	1	46.8651	66.0816
DATA	1913	23	43	0	0	A_42_P800048	NM_207610	10954	345.455	6.687442e+003	6.687562e+002	6182	63.5	1.922579e+001	0	0	0	0	0	0	6303.33	1	1	55.8519	68.1316
DATA	1914	23	44	0	0	A_43_P11525	NM_012710	10979.5	345.352	7.900719e+001	8.861344e+000	154	77	1.674657e+001	0	0	0	0	0	0	74.2389	1	1	57.5363	77.6757
DATA	1915	23	45	0	0	A_64_P019037	NM_001013886	11004.1	345.623	5.098814e+004	5.098816e+003	46733	77	2.699513e+001	0	0	0	0	1	0	47765.9	1	1	49.8279	84.7667
DATA	1916	23	46	0	0	A_64_P003378	NM_001024336	11030.4	345.427	3.709522e+002	3.731444e+001	422	76	1.808915e+001	0	0	0	0	0	0	346.316	1	1	57.5363	74.381
DATA	1917	23	47	0	0	A_44_P258855	NM_053431	11055.2	345.74	6.541371e+003	6.541497e+002	5941.5	71.5	1.295790e+001	0	0	0	0	0	0	6087.1	1	1	48.5334	70.9167
DATA	1918	23	48	0	1	ETG09_35454	ETG09_35454	11081	345.455	8.646412e+000	4.157466e+000	91	72.5	1.420899e+001	0	0	0	0	0	0	8.01705	1	0	55.8519	73.0333
DATA	1919	23	49	0	0	A_64_P089677	NM_001105977	11106.4	345.427	1.166105e+002	1.235461e+001	186	65.5	2.156415e+001	0	0	0	0	0	0	107.735	1	1	57.5363	74.4333
DATA	1920	23	50	0	0	A_64_P013609	A_64_P013609	11131.3	345.5	9.973906e+000	4.215564e+000	89	59.5	1.337197e+001	0	0	0	0	0	0	9.18173	1	0	49.1849	59.0714
DATA	1921	23	51	0	0	A_44_P357470	NM_030849	11156.7	345.685	1.038178e+003	1.038992e+002	1000	57	1.119833e+001	0	0	0	0	0	0	952.184	1	1	48.2044	59.0526
DATA	1922	23	52	0	0	A_44_P404064	ENSRNOT00000015387	11181.7	345.627	1.610374e+003	1.610902e+002	1536	60.5	9.678769e+000	0	0	0	0	0	0	1471.4	1	1	46.1809	59.4167
DATA	1923	23	53	0	0	A_64_P092167	A_64_P092167	11208.4	345.92	3.920518e+001	5.704222e+000	115	57	1.209477e+001	0	0	0	0	0	0	35.6774	1	1	39.8942	58.0769
DATA	1924	23	54	0	0	A_42_P463036	ENSRNOT00000038596	11232.8	345.773	5.078592e+003	5.078763e+002	4427	58	1.086217e+001	0	0	0	1	0	0	4603.9	1	1	48.5334	59.75
DATA	1925	23	55	0	0	A_44_P1003794	NM_012576	11258.3	346.167	1.376789e+003	1.377422e+002	1285	69.5	1.761716e+001	0	0	0	0	0	0	1243.19	1	1	45.835	69.5263
DATA	1926	23	56	0	0	A_64_P099006	BC105831	11283.6	345.831	1.062534e+001	4.325570e+000	92	65.5	1.936464e+001	0	0	0	0	0	0	9.55476	1	0	45.4864	72.2143
DATA	1927	23	57	0	0	A_42_P795467	NM_001108055	11308.7	345.618	7.348172e+002	7.360224e+001	720	60	1.114408e+001	0	0	0	0	0	0	658.077	1	1	46.5243	62.1579
DATA	1928	23	58	0	0	A_42_P629321	NM_031590	11335	345.455	3.534134e+002	3.559341e+001	392	59	1.050226e+001	0	0	0	0	0	0	315.137	1	1	55.8519	60.6563
DATA	1929	23	59	0	0	A_42_P549786	NM_022609	11359.5	345.855	4.989155e+003	4.989336e+002	4262	60	1.407614e+001	0	0	0	0	0	0	4431.29	1	1	47.2035	61.5429
DATA	1930	23	60	0	0	A_64_P006354	ENSRNOT00000043959	11385.6	345.427	6.430401e+001	7.715670e+000	140	61.5	9.841925e+000	0	0	0	0	0	0	56.8629	1	1	57.5363	63.2222
DATA	1931	23	61	0	0	A_64_P057109	A_64_P057109	11410.4	345.794	1.477074e+003	1.477695e+002	1394.5	59	1.109558e+001	0	0	0	0	0	0	1300.89	1	1	46.8651	59.7188
DATA	1932	23	62	0	0	A_44_P101361	NM_032070	11436.5	345.5	1.956557e+001	4.724305e+000	99	64	1.568274e+001	0	0	0	0	0	0	17.1561	1	0	57.5363	63.3448
DATA	1933	23	63	0	0	A_64_P103354	ENSRNOT00000066893	11461.2	345.906	7.272965e+002	7.285768e+001	705	64	1.212789e+001	0	0	0	0	0	0	635.176	1	1	45.835	63.3333
DATA	1934	23	64	0	0	A_42_P746868	NM_001127580	11486.7	346.041	3.052647e+004	3.052650e+003	26108	66	2.056259e+001	0	0	0	0	0	0	26548.2	1	1	48.5334	72.3429
DATA	1935	23	65	0	0	A_42_P707838	NM_012979	11511.6	345.722	2.491612e+003	2.491992e+002	2089	70	1.305864e+001	0	0	0	0	0	0	2157.86	1	1	48.5334	70.8537
DATA	1936	23	66	0	0	A_42_P628098	NM_001107991	11537.4	346.09	1.327787e+003	1.328506e+002	1214	69.5	1.388556e+001	0	0	0	0	0	0	1145.16	1	1	46.5243	70.1389
DATA	1937	23	67	0	0	A_64_P028071	ENSRNOT00000042928	11563.5	345.5	2.965273e+005	2.965273e+004	251960	71	1.701153e+001	0	0	0	0	0	0	254627	1	1	57.5363	75.2727
DATA	1938	23	68	0	0	A_64_P002944	A_64_P002944	11588.4	346.106	1.288217e+004	1.288225e+003	11138.5	65	1.247036e+001	0	0	0	0	0	0	11019	1	1	45.4864	65.52
DATA	1939	23	69	0	0	A_64_P072159	XM_574060	11614.4	345.915	3.465567e+001	5.621794e+000	109	57	1.237232e+001	0	0	0	0	0	0	29.5198	1	1	43.3362	59.95
DATA	1940	23	70	0	0	A_64_P052365	NM_001109318	11639.1	346.156	2.612703e+002	2.650220e+001	305	61	9.767723e+000	0	0	0	0	0	0	221.703	1	1	45.4864	62.9429
DATA	1941	23	71	0	0	A_64_P023150	ENSRNOT00000042777	11665.1	345.5	1.749474e+002	1.805478e+001	233	65	1.078044e+001	0	0	0	0	0	0	147.838	1	1	56.9804	64.0303
DATA	1942	23	72	0	0	A_44_P374902	NM_133429	11690.5	345.5	4.603583e+002	4.625322e+001	467	67	1.107394e+001	0	0	0	0	0	0	387.535	1	1	65	65.0811
DATA	1943	23	73	0	0	A_44_P163271	NM_198733	11715.7	345.5	1.443279e+001	4.721752e+000	92	69	1.472772e+001	0	0	0	0	0	0	12.1047	1	0	65	69.3721
DATA	1944	23	74	0	0	A_42_P548520	NM_001100834	11740.7	345.611	5.381034e+003	5.381224e+002	4490.5	67.5	1.389937e+001	0	0	0	0	0	0	4496.95	1	1	48.2044	68.9688
DATA	1945	23	75	0	0	A_64_P012154	XM_225935	11766.5	345.5	4.678015e+001	6.510675e+000	117.5	71.5	1.647585e+001	0	0	0	0	0	0	38.9526	1	1	57.5363	71.75
DATA	1946	23	76	0	0	A_64_P033574	NM_001000606	11792	345.545	7.914424e+000	4.612230e+000	86	70	1.415937e+001	0	0	0	0	0	0	6.56756	1	0	65	70.6341
DATA	1947	23	77	0	0	A_64_P027764	NM_022685	11817.5	345.5	1.878445e+002	1.932975e+001	240	66	1.495937e+001	0	0	0	0	0	0	155.36	1	1	57.5363	69.871
DATA	1948	23	78	0	0	A_42_P484738	NM_022266	11842.3	346.357	1.775840e+003	1.776429e+002	1535.5	68	1.171206e+001	0	0	0	0	0	0	1464.5	1	1	46.8651	70.1212
DATA	1949	23	79	0	0	A_64_P036355	NM_053311	11867.4	346.265	1.477161e+004	1.477168e+003	12071	62.5	1.089192e+001	0	0	0	0	0	0	12145.2	1	1	46.5243	62.9231
DATA	1950	23	80	0	0	A_42_P694928	NM_001109046	11893.5	345.5	2.453867e+002	2.496615e+001	281	64	1.521641e+001	0	0	0	0	0	0	201.128	1	1	57.5363	64.7561
DATA	1951	23	81	0	0	A_42_P588738	NM_133542	11919	345.545	1.128980e+002	1.219576e+001	174	60.5	1.034650e+001	0	0	0	0	0	0	92.2863	1	1	55.8519	60.75
DATA	1952	23	82	0	0	A_64_P141254	XM_001060542	11944.3	345.827	6.555760e+001	8.022406e+000	134.5	60	1.340013e+001	0	0	0	0	0	0	53.4582	1	1	40.6843	59.5417
DATA	1953	23	83	0	0	A_42_P546054	NM_001013873	11969.3	346.167	3.064331e+002	3.099175e+001	328.5	58	1.230447e+001	0	0	0	0	0	0	249.323	1	1	45.835	57.1667
DATA	1954	23	84	66	1	DarkCorner	DarkCorner	11995.1	346.154	4.659966e+000	4.644289e+000	77	59	1.100523e+001	0	0	0	0	0	0	-3.17726	0	0	48.5334	56.1786
DATA	1955	23	85	66	1	DarkCorner	DarkCorner	12020.5	345.5	4.669615e+000	4.653906e+000	77	57.5	9.870172e+000	0	0	0	0	0	0	-5.38557	0	0	57.5363	57.0435
DATA	1956	24	1	66	1	DarkCorner	DarkCorner	9900.26	352.372	4.078431e+000	4.064711e+000	75	51	8.860179e+000	0	0	0	0	0	0	-5.84618	0	0	36.9964	50.7907
DATA	1957	24	2	66	1	DarkCorner	DarkCorner	9925.58	352.427	4.061382e+000	4.047719e+000	75	54	1.007541e+001	0	0	0	0	0	0	-7.5004	0	0	65	52.8261
DATA	1958	24	3	0	0	A_64_P000371	NM_017308	9950.38	352.523	1.196344e+003	1.197023e+002	1201	51	9.552971e+000	0	0	0	0	0	0	1118.81	1	1	52.9257	50.5185
DATA	1959	24	4	0	0	A_42_P772356	NM_001191597	9975.93	352.478	6.499620e+003	6.499744e+002	6282	57	1.049562e+001	0	0	0	0	0	0	6101.75	1	1	47.8731	58.4762
DATA	1961	24	6	0	0	A_42_P470757	NM_001004075	10026.5	352.784	4.873172e+003	4.873336e+002	4473.5	55	1.060101e+001	0	0	0	0	0	0	4607.38	1	1	48.8603	53.7027
DATA	1962	24	7	0	0	A_64_P034250	ENSRNOT00000041464	10052.6	352.427	7.040531e+001	8.085171e+000	152	57	1.124943e+001	0	0	0	0	0	0	66.7836	1	1	57.5363	58.2571
DATA	1963	24	8	0	0	A_64_P065063	NM_012954	10078	352.455	1.026628e+002	1.100460e+001	182.5	59	1.271807e+001	0	0	0	0	0	0	97.6795	1	1	55.8519	59.2778
DATA	1964	24	9	0	0	A_64_P088866	ENSRNOT00000049194	10103	352.431	3.692201e+002	3.713289e+001	435.5	54	1.600000e+001	0	0	0	0	0	0	352.285	1	1	44.7812	57
DATA	1965	24	10	0	0	A_44_P111759	NM_001000956	10127.9	352.522	6.509545e+000	3.994860e+000	91	53	1.092530e+001	0	0	0	0	0	0	6.22728	1	0	37.847	55.2927
DATA	1966	24	11	0	0	A_64_P045019	ENSRNOT00000032417	10153.7	352.691	1.763277e+003	1.763715e+002	1842.5	57	1.106100e+001	0	0	0	0	0	0	1691.09	1	1	46.5243	55.9063
DATA	1967	24	12	0	0	A_64_P138989	XM_001053562	10179.6	352.427	6.433609e+001	7.535106e+000	143.5	56	1.057499e+001	0	0	0	0	0	0	61.843	1	1	65	58.0541
DATA	1968	24	13	0	0	A_42_P537715	NM_001025743	10205	352.455	2.787954e+003	2.788229e+002	2677.5	61	1.059628e+001	0	0	0	0	0	0	2685.5	1	1	55.8519	60.9063
DATA	1969	24	14	0	0	A_42_P453171	NM_001107063	10229.8	352.831	2.140860e+003	2.141216e+002	2111	62	1.206097e+001	0	0	0	0	0	0	2066.08	1	1	47.2035	62.5128
DATA	1971	24	16	0	0	A_64_P096157	ENSRNOT00000059486	10281.4	352.427	2.418735e+002	2.449890e+001	328	57.5	1.154514e+001	0	0	0	0	0	0	234.167	1	1	57.5363	59.25
DATA	1972	24	17	0	0	A_43_P10076	NM_031665	10306	352.722	1.294918e+004	1.294924e+003	12104.5	59	1.419934e+001	0	0	0	0	0	0	12552.9	1	1	47.8731	62.0606
DATA	1974	24	19	0	0	A_42_P772878	NM_001011936	10356.6	352.64	4.275893e+003	4.276069e+002	4006	62	1.542519e+001	0	0	0	0	0	0	4153.36	1	1	48.8603	63.5641
DATA	1976	24	21	0	0	A_44_P447394	NM_019193	10407.1	353	8.950152e+003	8.950236e+002	8345	63	1.088622e+001	0	0	0	0	0	0	8705.1	1	1	46.8651	60.3478
DATA	1977	24	22	0	0	A_42_P504250	NM_001134987	10432.6	352.87	1.363896e+003	1.364447e+002	1376	61	1.156316e+001	0	0	0	0	0	0	1327	1	1	46.8651	63.0408
DATA	1978	24	23	0	0	A_42_P675802	NM_145777	10458.9	352.5	1.812210e+003	1.812624e+002	1801	66	1.640675e+001	0	0	0	0	0	0	1763.38	1	1	56.9804	67.2286
DATA	1979	24	24	0	0	A_64_P111843	XM_001074913	10484.4	352.427	1.256588e+003	1.257186e+002	1300	68	1.805098e+001	0	0	0	0	0	0	1222.69	1	1	57.5363	70
DATA	1980	24	25	0	0	A_44_P118724	NM_019361	10508.9	352.5	1.611521e+004	1.611526e+003	15336	69	1.437517e+001	0	0	0	0	0	0	15677.5	1	1	47.8731	69.8571
DATA	1981	24	26	0	0	A_43_P21749	NM_001108329	10534.4	353.092	4.388251e+001	5.855562e+000	125	64	1.470394e+001	0	0	0	0	0	0	42.6781	1	1	45.1352	64.7209
DATA	1982	24	27	0	0	A_43_P11879	NM_017250	10560.5	352.5	4.536985e+001	5.969525e+000	125	64	1.303248e+001	0	0	0	0	0	0	44.0951	1	1	57.5363	65.475
DATA	1983	24	28	0	0	A_64_P023182	NM_001000033	10585.9	352.5	1.698106e+001	4.237559e+000	95	60	1.097265e+001	0	0	0	0	0	0	16.4917	1	0	56.9804	61.5517
DATA	1985	24	30	0	0	A_44_P368461	NM_001107085	10636.5	352.5	1.819878e+001	4.294824e+000	97	54	1.120772e+001	0	0	0	0	0	0	17.6391	1	0	57.5363	55.5
DATA	1986	24	31	0	0	A_64_P097257	A_64_P097257	10662.1	352.5	8.771244e+001	9.597218e+000	170	56.5	1.759967e+001	0	0	0	0	0	0	84.9078	1	1	56.9804	63.1
DATA	1987	24	32	0	0	A_64_P100634	NM_001100171	10686.6	353.294	3.536886e+002	3.558323e+001	426	67.5	1.915576e+001	0	0	0	0	0	0	341.955	1	1	46.1809	71.6522
DATA	1988	24	33	0	0	A_64_P041902	NM_001025653	10712.3	352.493	3.953156e+003	3.953349e+002	3715	60.5	1.218866e+001	0	0	0	0	0	0	3815.42	1	1	49.1849	60.7083
DATA	1990	24	35	0	0	A_64_P116171	NM_001004266	10762.8	352.761	1.726274e+002	1.770235e+001	250	61	1.209127e+001	0	0	0	0	0	0	166.021	1	1	46.8651	62.9074
DATA	1991	24	36	0	0	A_44_P243279	NM_001134780	10788.6	353.138	4.304103e+002	4.321995e+001	501	59	1.400676e+001	0	0	0	0	0	0	413.106	1	1	45.4864	61.5484
DATA	1992	24	37	0	0	A_64_P151468	XM_001062494	10814.5	352.5	1.085354e+002	1.154577e+001	174	59	1.996287e+001	0	0	0	0	0	0	103.928	1	1	57.5363	62.75
DATA	1993	24	38	0	0	A_64_P075769	ENSRNOT00000043984	10839.2	353.303	4.871676e+003	4.871836e+002	4800.5	55.5	9.708046e+000	0	0	0	0	0	0	4654.92	1	1	45.4864	57.3846
DATA	1994	24	39	0	0	A_42_P508921	NM_031703	10865.3	352.5	1.685732e+001	4.300862e+000	96	58	1.569123e+001	0	0	0	0	0	0	16.0641	1	0	57.5363	59.2128
DATA	1995	24	40	0	0	A_44_P503376	NM_001000274	10890.5	352.5	2.775528e+001	4.841545e+000	103	54	1.129304e+001	0	0	0	0	0	0	26.381	1	1	65	53.0741
DATA	1996	24	41	0	0	A_64_P093088	NM_001000816	10916	352.545	3.903490e+001	5.573233e+000	120	60	1.238945e+001	0	0	0	0	0	0	37.0003	1	1	55.8519	62.3864
DATA	1997	24	42	0	0	A_44_P489608	NM_023967	10941.4	352.573	1.482175e+002	1.534924e+001	229	59	1.788266e+001	0	0	0	0	0	0	140.09	1	1	65	63.7059
DATA	1998	24	43	0	0	A_44_P213088	ENSRNOT00000037507	10966	352.909	4.065924e+001	5.704108e+000	122	74	1.890346e+001	0	0	0	0	0	0	38.3209	1	1	48.2044	73.2162
DATA	1999	24	44	0	0	A_64_P060725	NM_001025278	10992.3	352.5	1.162553e+001	4.178824e+000	92.5	70	1.685500e+001	0	0	0	0	0	0	10.9209	1	0	57.5363	70.8182
DATA	2000	24	45	0	0	A_44_P384698	XM_216321	11016.8	353.015	3.136945e+003	3.137203e+002	3043	80	2.183567e+001	0	0	0	0	1	0	2937.96	1	1	46.1809	82.5263
DATA	2001	24	46	0	0	A_42_P696084	NM_031022	11042.1	353.143	3.908071e+003	3.908280e+002	3707.5	72	1.305367e+001	0	0	0	0	0	0	3648.13	1	1	45.4864	70.1143
DATA	2002	24	47	0	0	A_64_P014918	NM_001108246	11067.7	353.357	1.188375e+003	1.189066e+002	1147.5	71	1.157243e+001	0	0	0	0	0	0	1105.55	1	1	46.8651	71.6053
DATA	2003	24	48	0	0	A_64_P032690	ENSRNOT00000049975	11093.5	352.854	9.881622e+004	9.881623e+003	91222	74	2.328713e+001	0	0	0	0	1	0	91593	1	1	51.0895	80.8276
DATA	2004	24	49	0	0	A_42_P481516	NM_134364	11119.3	352.5	4.118531e+003	4.118733e+002	3742.5	63	1.438860e+001	0	0	0	1	0	0	3803.19	1	1	57.5363	67.9286
DATA	2005	24	50	0	0	A_64_P166158	ENSRNOT00000013694	11143.7	353.116	1.716764e+002	1.764979e+001	236	55	9.655369e+000	0	0	0	0	0	0	157.99	1	1	46.5243	54.8846
DATA	2006	24	51	0	0	A_64_P140338	A_64_P140338	11169.9	352.5	1.497261e+001	4.377726e+000	94.5	61	1.281231e+001	0	0	0	0	0	0	13.7236	1	0	56.9804	62.7179
DATA	2007	24	52	0	1	ERCC-00062_278	ERCC-00062_278	11195.2	352.821	2.053021e+002	2.094135e+001	275	58	1.149788e+001	0	0	0	0	0	0	187.467	1	1	41.8414	57.2683
DATA	2008	24	53	0	0	A_64_P110838	NM_001013175	11220.6	352.573	3.054502e+002	3.082507e+001	349	59.5	1.214230e+001	0	0	0	0	0	0	277.811	1	1	57.5363	60.3462
DATA	2009	24	54	0	0	A_42_P802358	NM_001024341	11245.3	353.357	1.409782e+004	1.409788e+003	12123	67.5	1.410597e+001	0	0	0	0	0	0	12774.7	1	1	46.8651	66.4615
DATA	2010	24	55	0	0	A_64_P010421	A_64_P010421	11270.8	353.121	4.966565e+001	6.490305e+000	126	65	1.769707e+001	0	0	0	0	0	0	44.8202	1	1	45.835	68.3784
DATA	2011	24	56	0	0	A_43_P13320	NM_138880	11296.6	352.573	1.024700e+001	4.319293e+000	90	62	1.208509e+001	0	0	0	0	0	0	9.20807	1	0	57.5363	64.129
DATA	2012	24	57	0	0	A_42_P800916	NM_022403	11322.4	352.573	6.118321e+001	7.428883e+000	141	60	1.110410e+001	0	0	0	0	0	0	54.75	1	1	57.5363	63.5111
DATA	2013	24	58	0	0	A_42_P554610	XM_001064863	11346.7	353.167	1.090698e+004	1.090706e+003	8949	55	1.291461e+001	0	0	0	0	0	0	9722.68	1	1	45.835	57.75
DATA	2014	24	59	0	0	A_42_P476353	NM_001012113	11372.1	353.273	1.065689e+004	1.065698e+003	9167.5	63	9.491933e+000	0	0	0	0	0	0	9460.38	1	1	45.835	62.825
DATA	2015	24	60	0	0	A_43_P12234	NM_022516	11397.7	353.167	3.344380e+003	3.344652e+002	3000	60	1.109667e+001	0	0	0	0	0	0	2956.29	1	1	45.835	60.6563
DATA	2016	24	61	0	0	A_64_P048315	ENSRNOT00000044039	11423.5	353.257	3.351260e+002	3.378527e+001	375.5	62	1.071385e+001	0	0	0	0	0	0	294.981	1	1	47.2035	60.0857
DATA	2017	24	62	0	0	A_44_P477047	NM_171983	11449.4	352.573	7.067816e+004	7.067817e+003	60509	68.5	1.513729e+001	0	0	0	0	0	0	61935.7	1	1	57.5363	65.7857
DATA	2018	24	63	0	0	A_43_P11871	NM_017230	11474.5	352.648	8.494011e+001	9.529744e+000	156	65	1.541703e+001	0	0	0	0	0	0	74.1263	1	1	57.5363	66.9722
DATA	2019	24	64	0	0	A_64_P060608	XM_001068783	11500	352.545	4.320613e+001	6.123249e+000	120	70	1.894174e+001	0	0	0	0	0	0	37.5463	1	1	55.8519	74
DATA	2020	24	65	0	0	A_64_P115811	NM_001008516	11525.5	352.648	3.260682e+001	5.442063e+000	111	65	1.226764e+001	0	0	0	0	0	0	28.2176	1	1	57.5363	67.9302
DATA	2021	24	66	0	0	A_44_P131296	ENSRNOT00000039892	11550.6	352.573	3.708001e+001	5.734972e+000	113	71	1.760375e+001	0	0	0	0	0	0	31.9571	1	1	57.5363	75.2727
DATA	2022	24	67	0	0	A_44_P668388	NM_001109245	11576.4	352.573	3.994267e+002	4.018355e+001	430	72.5	1.772582e+001	0	0	0	0	0	0	342.808	1	1	57.5363	74.7308
DATA	2023	24	68	0	0	A_64_P069729	NM_019189	11601.5	352.648	8.231498e+001	9.338815e+000	153	59.5	1.233241e+001	0	0	0	0	0	0	70.3654	1	1	57.5363	63.0952
DATA	2024	24	69	1028	1	(+)E1A_r60_1	E1A_r60_1	11626.9	352.614	4.443580e+000	4.428823e+000	82	56	1.443106e+001	0	0	0	0	0	0	0.35085	0	0	57.259	59.4571
DATA	2025	24	70	0	0	A_64_P165441	NM_001109059	11652.1	353.241	4.316807e+001	6.196468e+000	120	61	9.690015e+000	0	0	0	0	0	0	36.6151	1	1	42.9674	61.2162
DATA	2026	24	71	0	0	A_44_P1034910	NM_201562	11677.1	353.418	3.810046e+003	3.810307e+002	3269.5	63	1.044566e+001	0	0	0	0	0	0	3219.55	1	1	45.835	63.2813
DATA	2027	24	72	0	0	A_42_P631818	NM_030854	11702.3	353.343	1.273360e+003	1.274148e+002	1120.5	65.5	1.107006e+001	0	0	0	0	0	0	1071.95	1	1	46.8651	63.6842
DATA	2028	24	73	0	0	A_64_P095620	ENSRNOT00000031258	11728	353.211	5.554017e+001	7.145672e+000	128	69.5	1.409167e+001	0	0	0	0	0	0	46.5792	1	1	46.8651	69.2727
DATA	2029	24	74	0	0	A_42_P726573	NM_053838	11753.4	353	1.792836e+003	1.793404e+002	1594	70	1.343665e+001	0	0	0	0	0	0	1498.11	1	1	48.5334	69.1071
DATA	2030	24	75	0	0	A_64_P029142	NM_001107866	11778.5	352.897	1.038624e+002	1.133037e+001	167	77	1.414719e+001	0	0	0	0	0	0	86.4875	1	1	47.2035	73.4103
DATA	2031	24	76	0	0	A_43_P22902	NM_001106874	11804.5	353	5.932722e+000	4.582142e+000	87.5	65	1.388762e+001	0	0	0	0	0	0	4.92337	1	0	54.1152	68.8611
DATA	2032	24	77	0	0	A_42_P619008	NM_001013079	11829.1	353.309	5.213510e+003	5.213709e+002	4331	68	1.179004e+001	0	0	0	0	0	0	4313.26	1	1	45.835	68.1724
DATA	2033	24	78	0	0	A_64_P054421	A_64_P054421	11855.5	353	1.971034e+001	4.979260e+000	98	64	1.189217e+001	0	0	0	0	0	0	16.2534	1	0	65	64.069
DATA	2034	24	79	0	0	A_42_P627330	NM_001106628	11880.1	353.104	6.722296e+002	6.737918e+001	624.5	65	1.604567e+001	0	0	0	0	0	0	552.763	1	1	46.8651	64.7222
DATA	2035	24	80	0	0	A_64_P049613	A_64_P049613	11906.5	353	3.497662e+001	5.777833e+000	107	64	1.537682e+001	0	0	0	0	0	0	28.6768	1	1	54.1152	66.0256
DATA	2036	24	81	0	0	A_42_P708614	NM_001130505	11931.5	353	5.040622e+004	5.040624e+003	40547.5	62.5	1.464560e+001	0	0	0	1	0	0	41221.3	1	1	54.1152	63.7273
DATA	2037	24	82	0	0	A_42_P660068	NM_031350	11956.3	352.986	2.202118e+003	2.202603e+002	1830	58	1.248965e+001	0	0	0	0	0	0	1796.58	1	1	47.2035	57.4839
DATA	2038	24	83	66	1	DarkCorner	DarkCorner	11982.5	353	4.647981e+000	4.632345e+000	75	58	1.012502e+001	0	0	0	0	0	0	-5.90978	0	0	54.1152	58.3667
DATA	2039	24	84	66	1	DarkCorner	DarkCorner	12007.5	353	4.657282e+000	4.641638e+000	82	58.5	1.130253e+001	0	0	0	0	0	0	0.12104	0	0	54.1152	57.6667
DATA	2040	24	85	66	1	DarkCorner	DarkCorner	12033.5	353	4.665939e+000	4.650300e+000	79.5	53	1.155915e+001	0	0	0	0	0	0	0.187391	0	0	54.1152	53.7125
DATA	2041	25	1	66	1	DarkCorner	DarkCorner	9887.1	359.61	4.083264e+000	4.069528e+000	79	48	1.066232e+001	0	0	0	0	0	0	-1.07432	0	0	49.8279	48.4372
DATA	2042	25	2	66	1	DarkCorner	DarkCorner	9913	359.545	4.065528e+000	4.051852e+000	82	48.5	1.115520e+001	0	0	0	0	0	0	-1.32886	0	0	55.8519	51.4706
DATA	2043	25	3	0	0	A_64_P106975	A_64_P106975	9937.72	359.634	2.692564e+002	2.722640e+001	329	54.5	8.503755e+000	0	0	0	0	0	0	251.567	1	1	47.8731	52.8636
DATA	2044	25	4	0	0	A_42_P799702	NM_145093	9963.23	359.986	4.583181e+002	4.600774e+001	507	51	9.326457e+000	0	0	0	0	0	0	429.914	1	1	46.8651	51.129
DATA	2045	25	5	0	0	A_42_P704429	NM_053428	9988.5	360.257	3.482796e+004	3.482798e+003	32162	60	1.181524e+001	0	0	0	0	0	0	32791.8	1	1	47.2035	60.7
DATA	2046	25	6	0	0	A_64_P129730	NM_001033896	10014.5	359.5	1.476843e+002	1.529811e+001	216.5	52.5	1.123384e+001	0	0	0	0	0	0	139.538	1	1	57.5363	53.9722
DATA	2047	25	7	0	0	A_64_P156308	NM_001008284	10039.9	359.5	6.771309e+002	6.782981e+001	702	56	1.164437e+001	0	0	0	0	0	0	641.916	1	1	56.9804	56.3864
DATA	2048	25	8	0	0	A_44_P152029	A_44_P152029	10065.4	359.573	1.490136e+001	4.235616e+000	95	59.5	1.318485e+001	0	0	0	0	0	0	14.1712	1	0	65	60.575
DATA	2049	25	9	0	0	A_42_P751152	NM_001106360	10090.6	359.573	5.335561e+004	5.335563e+003	50950	57	1.614394e+001	0	0	0	0	0	0	50889.6	1	1	57.5363	60.3704
DATA	2050	25	10	0	0	A_64_P010494	NM_001001421	10115.7	360.278	1.357489e+002	1.413570e+001	207	53.5	1.514967e+001	0	0	0	0	0	0	129.841	1	1	47.5395	57.0667
DATA	2051	25	11	0	0	A_64_P054606	NM_001107279	10141	360.246	3.634599e+002	3.655806e+001	434	57	1.107982e+001	0	0	0	0	0	0	348.53	1	1	45.4864	55.6842
DATA	2052	25	12	0	0	A_44_P335679	NM_001108168	10166.9	359.5	4.795709e+001	6.195878e+000	129	56	9.611574e+000	0	0	0	0	0	0	46.0933	1	1	56.9804	55.2647
DATA	2053	25	13	0	0	A_64_P128766	NM_001034912	10192.4	359.573	1.543982e+002	1.592831e+001	225.5	61	9.365591e+000	0	0	0	0	0	0	148.724	1	1	57.5363	60.6667
DATA	2054	25	14	0	0	A_42_P595591	NM_031011	10216.8	360.406	1.989053e+004	1.989057e+003	18328	64	1.089202e+001	0	0	0	0	0	0	19198.2	1	1	46.5243	62.4063
DATA	2055	25	15	0	0	A_44_P962846	ENSRNOT00000058887	10242.3	360.214	3.857449e+002	3.877110e+001	446	63	1.507398e+001	0	0	0	0	0	0	372.979	1	1	47.2035	64.175
DATA	2056	25	16	0	0	A_64_P111878	XR_005569	10267.4	360.25	1.794902e+003	1.795324e+002	1918	61	1.256361e+001	0	0	0	0	0	0	1738.25	1	1	42.9674	61.7619
DATA	2057	25	17	0	0	A_64_P149225	NM_001100833	10293.7	359.5	1.185205e+005	1.185205e+004	114549	66	1.177046e+001	0	0	0	0	0	0	114934	1	1	57.5363	66.3929
DATA	2058	25	18	0	0	A_64_P032361	ENSRNOT00000061428	10318.5	360.257	1.169958e+003	1.170602e+002	1207	58	1.098263e+001	0	0	0	0	0	0	1136.02	1	1	47.2035	58.3056
DATA	2059	25	19	0	0	A_64_P038843	A_64_P038843	10344.6	359.573	1.909462e+001	4.323982e+000	101.5	64.5	1.603105e+001	0	0	0	0	0	0	18.5583	1	0	57.5363	66.5714
DATA	2060	25	20	1028	1	(+)E1A_r60_a97	E1A_r60_a97	10370	359.545	1.609282e+001	4.197129e+000	92.5	62	1.611463e+001	0	0	0	0	0	0	15.6536	1	0	55.8519	64.3158
DATA	2061	25	21	0	0	A_42_P586883	NM_001106416	10395.4	359.573	6.316588e+001	7.409871e+000	144	60	1.892089e+001	0	0	0	0	0	0	61.4813	1	1	57.5363	64.6
DATA	2062	25	22	0	0	A_42_P626023	NM_001107265	10419.9	360.462	8.492064e+002	8.500886e+001	902	55.5	1.066787e+001	0	0	0	0	0	0	827.025	1	1	44.4243	56.3
DATA	2063	25	23	0	0	A_64_P304646	ENSRNOT00000046873	10446.4	359.573	3.810346e+001	5.431795e+000	121	62	1.458997e+001	0	0	0	0	0	0	37.1135	1	1	65	64.6122
DATA	2064	25	24	0	0	A_42_P540711	NM_133568	10471	360.424	1.145546e+004	1.145552e+003	10955	60	1.202869e+001	0	0	0	0	0	0	11160.1	1	1	45.4864	61.2424
DATA	2065	25	25	0	0	A_64_P079149	XM_001063529	10497	359.545	2.988149e+002	3.013122e+001	370.5	70	1.342029e+001	0	0	0	0	0	0	291.041	1	1	65	67.6667
DATA	2066	25	26	0	0	A_42_P507072	FQ213070	10521.6	359.973	4.924488e+003	4.924640e+002	4859	62.5	1.388135e+001	0	0	0	0	0	0	4795.35	1	1	48.5334	62.6071
DATA	2067	25	27	0	0	A_44_P314270	ENSRNOT00000015469	10547	360.224	2.073606e+002	2.109479e+001	277	63	1.279892e+001	0	0	0	0	0	0	201.838	1	1	46.1809	62.5135
DATA	2068	25	28	0	0	A_64_P026098	ENSRNOT00000027092	10573.4	359.573	1.068772e+002	1.136909e+001	183	60	1.084193e+001	0	0	0	0	0	0	103.951	1	1	57.5363	61.2121
DATA	2069	25	29	0	0	A_64_P018599	XM_229548	10598.1	360.396	3.892396e+000	3.879302e+000	76	61.5	1.464024e+001	0	0	0	0	0	0	-6.20729	0	0	41.0736	64.1
DATA	2070	25	30	0	0	A_43_P15907	NM_001134567	10624	359.545	4.713739e+001	6.107592e+000	126	60	1.550804e+001	0	0	0	0	0	0	45.7639	1	1	55.8519	61.0256
DATA	2071	25	31	0	0	A_64_P151804	A_64_P151804	10648.8	360.318	7.630297e+001	8.563599e+000	157	54	1.303691e+001	0	0	0	0	0	0	74.0049	1	1	45.4864	56.4524
DATA	2072	25	32	0	0	A_42_P642743	NM_017005	10673.8	360.463	1.490849e+004	1.490854e+003	13972.5	61	1.774424e+001	0	0	0	0	0	0	14441.1	1	1	45.835	69.5161
DATA	2073	25	33	0	0	A_42_P630463	NM_022238	10700.4	359.573	4.326989e+002	4.344522e+001	508	63	1.436452e+001	0	0	0	0	0	0	418.42	1	1	57.5363	65.1143
DATA	2074	25	34	0	0	A_64_P119533	NM_001000351	10725.5	359.648	2.606321e+001	4.695331e+000	109	59	1.087458e+001	0	0	0	0	0	0	25.1624	1	1	57.5363	59.2222
DATA	2075	25	35	0	0	A_64_P158068	FQ219182	10750	360.424	3.413437e+003	3.413661e+002	3234	59	1.396312e+001	0	0	0	0	0	0	3290.16	1	1	45.4864	63.2593
DATA	2076	25	36	0	0	A_64_P000779	XM_225838	10776.4	359.573	3.235669e+001	5.083176e+000	115	61	1.160297e+001	0	0	0	0	0	0	31.1204	1	1	57.5363	62.06
DATA	2077	25	37	0	0	A_44_P630082	ENSRNOT00000020640	10801.2	360.352	2.070861e+002	2.107783e+001	279	56	3.117160e+001	0	0	0	0	0	0	198.791	1	1	46.8651	66.7059
DATA	2078	25	38	0	0	A_42_P717654	XM_001063683	10826.3	360.348	4.361081e+003	4.361259e+002	4125	54.5	1.170091e+001	0	0	0	0	0	0	4177.11	1	1	46.8651	56.0417
DATA	2079	25	39	0	0	A_42_P792382	NM_017257	10851.6	360.232	7.959070e+003	7.959168e+002	7453	56	1.437681e+001	0	0	0	0	0	0	7605.06	1	1	46.8651	59.5476
DATA	2080	25	40	0	0	A_64_P075035	NM_001001014	10877.9	359.935	2.284156e+002	2.318171e+001	295	56	1.155719e+001	0	0	0	0	0	0	217.673	1	1	54.4085	57.3529
DATA	2081	25	41	0	0	A_64_P021281	NM_001039022	10902.6	359.958	3.810494e+003	3.810701e+002	3716	54	9.192701e+000	0	0	0	0	0	0	3621.9	1	1	48.2044	54.6667
DATA	2082	25	42	0	0	A_44_P729533	TC581820	10928.2	360.116	7.769562e+003	7.769664e+002	7233.5	58	1.349394e+001	0	0	0	0	0	0	7364.47	1	1	46.5243	59.625
DATA	2083	25	43	0	0	A_42_P802358	NM_001024341	10953.3	360.026	1.405429e+004	1.405435e+003	12774	56.5	1.140144e+001	0	0	0	0	0	0	13283.1	1	1	49.1849	55.4167
DATA	2084	25	44	0	0	A_42_P481087	XM_232226	10978.5	360.056	1.592179e+003	1.592682e+002	1517	66	1.669626e+001	0	0	0	0	0	0	1500.29	1	1	48.5334	68.3478
DATA	2085	25	45	0	0	A_42_P561597	NM_001106486	11004.3	360.219	9.476168e+003	9.476253e+002	8822.5	70	2.250676e+001	0	0	0	0	0	0	8901.07	1	1	48.2044	74.9643
DATA	2086	25	46	0	0	A_64_P113381	A_64_P113381	11030.5	360	1.153381e+001	4.189756e+000	91	71	1.722266e+001	0	0	0	0	0	0	10.797	1	0	65	71.8649
DATA	2087	25	47	0	0	A_64_P088695	NM_001134414	11054.7	360.268	1.549702e+003	1.550228e+002	1426	71	1.187282e+001	0	0	0	0	0	0	1446.13	1	1	47.2035	71.6216
DATA	2088	25	48	0	0	A_44_P728586	ENSRNOT00000013367	11081	360	1.435881e+003	1.436454e+002	1431	68	1.137981e+001	0	0	0	0	0	0	1335.06	1	1	65	69
DATA	2089	25	49	0	0	A_42_P544898	NM_001108279	11106.5	360	5.580315e+001	6.906768e+000	137	70	2.005792e+001	0	0	0	0	0	0	51.6997	1	1	54.1152	73.4848
DATA	2090	25	50	0	0	A_44_P432910	NM_012814	11131.5	360	1.480306e+005	1.480306e+004	136183	60	1.037658e+001	0	0	0	0	0	0	136654	1	1	54.1152	61.56
DATA	2091	25	51	0	0	A_64_P157820	XM_001079095	11156.5	360.319	1.219615e+002	1.286662e+001	196	54.5	1.142773e+001	0	0	0	0	0	0	112.183	1	1	47.2035	57.4
DATA	2092	25	52	0	0	A_42_P601802	NM_134465	11182.1	360.063	3.329795e+003	3.330050e+002	3001	65	1.140458e+001	0	0	0	0	0	0	3050.98	1	1	49.5074	63.25
DATA	2093	25	53	0	0	A_64_P039737	NM_001130508	11207.4	360.307	5.627662e+002	5.642802e+001	597.5	60.5	1.183307e+001	0	0	0	0	0	0	513.683	1	1	47.8731	59.5833
DATA	2094	25	54	0	0	A_42_P648800	AA998304	11233.5	360	2.199697e+002	2.238463e+001	281	65	1.264869e+001	0	0	0	0	0	0	199.961	1	1	65	63.5484
DATA	2095	25	55	0	0	A_64_P007009	ENSRNOT00000014567	11258.3	360.219	2.436137e+003	2.436492e+002	2281	69	1.922324e+001	0	0	0	0	0	0	2206.03	1	1	48.2044	69.4595
DATA	2096	25	56	0	0	A_64_P049527	TC606896	11283.8	360.343	1.919550e+002	1.964549e+001	253	59	1.133303e+001	0	0	0	0	0	0	173.123	1	1	45.835	62
DATA	2097	25	57	0	0	A_44_P281595	NM_001037556	11308.8	360.156	7.568868e+001	8.654962e+000	150	69	1.188786e+001	0	0	0	0	0	0	67.9871	1	1	48.8603	68.8919
DATA	2098	25	58	0	0	A_44_P374638	NM_024391	11335	360	6.259428e+001	7.546716e+000	139.5	60	1.080696e+001	0	0	0	0	0	0	55.9843	1	1	65	61.881
DATA	2100	25	60	0	0	A_64_P046416	A_64_P046416	11385.5	360	9.460824e+001	1.037191e+001	167	63	1.040463e+001	0	0	0	0	0	0	83.9197	1	1	54.1152	63.0278
DATA	2101	25	61	0	0	A_44_P428560	NM_001001358	11410.7	360.477	6.228959e+001	7.550908e+000	134	58	1.045555e+001	0	0	0	0	0	0	55.029	1	1	45.1352	59.0385
DATA	2102	25	62	0	0	A_44_P208887	NM_001105774	11436.5	360	1.148730e+002	1.226109e+001	184.5	62	1.241911e+001	0	0	0	0	0	0	101.04	1	1	54.1152	60.6486
DATA	2103	25	63	0	0	A_42_P533792	NM_001106575	11460.9	360.2	9.886326e+003	9.886420e+002	8397.5	69	1.336751e+001	0	0	0	0	0	0	8661.17	1	1	46.8651	68.9032
DATA	2104	25	64	0	0	A_42_P802550	NM_017365	11486.4	360.347	5.541870e+002	5.558697e+001	556	68.5	1.526638e+001	0	0	0	0	0	0	483.488	1	1	47.8731	69.7059
DATA	2105	25	65	0	0	A_42_P545129	ENSRNOT00000007554	11512	360.384	9.008708e+002	9.019157e+001	819	66.5	1.377631e+001	0	0	0	0	0	0	782.655	1	1	48.8603	68.4792
DATA	2106	25	66	0	0	A_42_P500675	NM_013179	11537.8	360.527	5.268548e+002	5.286544e+001	536	63	1.470791e+001	0	0	0	0	0	0	455.807	1	1	48.8603	68.5
DATA	2107	25	67	0	0	A_44_P127238	NM_001127655	11562.8	360.519	1.053677e+003	1.054585e+002	983	70	1.739907e+001	0	0	0	0	0	0	907.895	1	1	49.8279	73.0857
DATA	2108	25	68	0	0	A_64_P042142	ENSRNOT00000027371	11587.8	360.514	1.147760e+002	1.228980e+001	179.5	68	1.121500e+001	0	0	0	0	0	0	98.4997	1	1	47.8731	67.7353
DATA	2109	25	69	0	0	A_44_P279756	NM_022848	11613.8	360.985	1.243821e+001	4.583315e+000	90	57	1.138262e+001	0	0	0	0	0	0	10.6315	1	0	45.835	59.7436
DATA	2110	25	70	0	0	A_64_P119597	NM_001106871	11639.6	360.427	9.883184e+000	4.538561e+000	90.5	62	1.631589e+001	0	0	0	0	0	0	8.41267	1	0	57.5363	64.8158
DATA	2111	25	71	0	0	A_44_P790674	NM_001191933	11665.1	360.386	4.609218e+001	6.404789e+000	124	61	1.104235e+001	0	0	0	0	0	0	39.0804	1	1	65	61.8276
DATA	2112	25	72	0	0	A_44_P405618	ENSRNOT00000025426	11689.6	360.662	2.845240e+002	2.880034e+001	317	66	1.094483e+001	0	0	0	0	0	0	240.367	1	1	47.8731	63.7813
DATA	2113	25	73	0	0	A_42_P719478	NM_001191779	11715.6	360.427	2.960884e+001	5.370517e+000	104	68	1.316008e+001	0	0	0	0	0	0	24.9168	1	1	57.5363	66.3659
DATA	2114	25	74	0	0	A_64_P061424	A_64_P061424	11741.4	360.427	3.023739e+001	5.419219e+000	105	68	1.606168e+001	0	0	0	0	0	0	25.3517	1	1	57.5363	68.5405
DATA	2115	25	75	0	0	A_44_P1042876	NM_212504	11765.8	360.557	1.998090e+003	1.998600e+002	1692	66	1.415047e+001	0	0	0	0	0	0	1669.6	1	1	50.1463	68.0455
DATA	2116	25	76	0	0	A_44_P470043	NM_001108103	11792	360.455	1.043204e+002	1.137253e+001	173	64.5	1.542034e+001	0	0	0	0	0	0	86.8609	1	1	55.8519	70.5208
DATA	2117	25	77	0	0	A_64_P108484	ENSRNOT00000046584	11817.4	360.427	4.459160e+001	6.366096e+000	118	68.5	1.723062e+001	0	0	0	0	0	0	37.006	1	1	57.5363	72.4063
DATA	2118	25	78	0	0	A_42_P666065	NM_001014069	11842.1	360.493	5.418296e+002	5.437428e+001	510	65	1.413276e+001	0	0	0	0	0	0	448.284	1	1	48.5334	66.7879
DATA	2119	25	79	0	0	A_64_P136571	NM_001134545	11867.5	360.328	1.417311e+002	1.489209e+001	197	60.5	1.064454e+001	0	0	0	0	0	0	116.903	1	1	46.5243	58.1154
DATA	2120	25	80	0	0	A_42_P816740	NM_001108705	11892.8	360.507	4.448015e+002	4.471576e+001	447	64	1.369142e+001	0	0	0	0	0	0	365.848	1	1	47.8731	65.4634
DATA	2121	25	81	0	0	A_64_P018142	NM_001100716	11919	360.455	2.705377e+002	2.744158e+001	300	64	1.202868e+001	0	0	0	0	0	0	221.895	1	1	65	63.7568
DATA	2122	25	82	0	0	A_42_P779687	ENSRNOT00000034449	11943.6	360.36	8.056593e+003	8.056724e+002	6298.5	58	1.044522e+001	0	0	0	0	0	0	6591.72	1	1	48.8603	58.1111
DATA	2124	25	84	66	1	DarkCorner	DarkCorner	11995.3	360.846	4.644637e+000	4.629012e+000	78	59	1.001209e+001	0	0	0	0	0	0	-3.89614	0	0	45.835	59.875
DATA	2125	25	85	66	1	DarkCorner	DarkCorner	12020.6	360.427	4.654007e+000	4.638350e+000	81	57.5	1.257418e+001	0	0	0	0	0	0	-1.90884	0	0	57.5363	59.1724
DATA	2126	26	1	66	1	DarkCorner	DarkCorner	9900.5	367	4.069591e+000	4.055900e+000	76	53	1.098515e+001	0	0	0	0	0	0	-4.1412	0	0	54.1152	54.1026
DATA	2127	26	2	66	1	DarkCorner	DarkCorner	9925.5	367	4.052900e+000	4.039265e+000	79.5	52	1.221325e+001	0	0	0	0	0	0	-2.12865	0	0	54.1152	52.8889
DATA	2128	26	3	0	0	A_42_P713844	NM_001106167	9950.16	367.103	9.362093e+002	9.370735e+001	948	51	1.034077e+001	0	0	0	0	0	0	877.338	1	1	46.5243	51.8125
DATA	2129	26	4	0	0	A_42_P627219	NM_001012468	9976.09	367.104	1.045101e+004	1.045109e+003	9607	53	1.160544e+001	0	0	0	0	0	0	9831.96	1	1	46.8651	53.6216
DATA	2130	26	5	0	0	A_42_P461003	NM_001044283	10001.1	367.309	1.483551e+004	1.483557e+003	13901	60	1.222038e+001	0	0	0	0	0	0	14007	1	1	45.835	59.2188
DATA	2131	26	6	0	0	A_44_P1019923	NM_022522	10026.6	367.357	2.825732e+003	2.826012e+002	2645.5	56	8.881194e+000	0	0	0	0	0	0	2677.13	1	1	47.2035	55.2195
DATA	2132	26	7	0	0	A_42_P814056	NM_001108866	10051.8	367.296	1.155427e+004	1.155434e+003	10911	59	1.471080e+001	0	0	0	0	0	0	10981.8	1	1	46.8651	60.95
DATA	2133	26	8	0	0	A_42_P795269	NM_001134730	10078.1	367.297	7.832640e+003	7.832740e+002	7848	62	1.265823e+001	0	0	0	0	0	0	7468.03	1	1	45.4864	62.3333
DATA	2134	26	9	0	0	A_42_P763522	NM_001013980	10102.6	367.157	3.951670e+003	3.951866e+002	3759	57	1.291491e+001	0	0	0	0	0	0	3778.03	1	1	47.5395	59.2222
DATA	2135	26	10	0	0	A_44_P292437	NM_153309	10127.8	367.3	2.958539e+002	2.984571e+001	361	55	1.405869e+001	0	0	0	0	0	0	283.61	1	1	46.8651	58.3056
DATA	2136	26	11	0	0	A_64_P065313	ENSRNOT00000042070	10154.5	367	1.499582e+002	1.550055e+001	232	56.5	1.031621e+001	0	0	0	0	0	0	144.118	1	1	54.1152	56
DATA	2137	26	12	0	0	A_64_P008047	NM_001033670	10178.7	367.353	3.097036e+004	3.097039e+003	28764	56	1.047111e+001	0	0	0	0	0	0	29830.4	1	1	46.1809	58.5405
DATA	2138	26	13	0	0	A_64_P080612	TC638889	10204.7	367.545	6.060186e+003	6.060312e+002	5891	64	9.354316e+000	0	0	0	0	0	0	5849.69	1	1	45.1352	61.6452
DATA	2139	26	14	0	0	A_43_P17696	NM_001004257	10229.5	367.324	3.204816e+003	3.205053e+002	3059	59	1.451452e+001	0	0	0	0	0	0	3099.12	1	1	47.2035	60.5333
DATA	2140	26	15	0	0	A_64_P019608	NM_001105713	10255.3	367.438	7.622641e+002	7.632572e+001	825	59	1.352601e+001	0	0	0	0	0	0	738.407	1	1	47.5395	61.4211
DATA	2141	26	16	0	0	A_64_P108575	ENSRNOT00000046600	10281.5	367	4.034443e+001	5.602006e+000	124	61	1.157136e+001	0	0	0	0	0	0	39.1398	1	1	54.1152	60.2162
DATA	2142	26	17	0	0	A_64_P136859	NM_001109642	10305.8	367.194	6.978199e+003	6.978307e+002	6690	61	8.826114e+000	0	0	0	0	0	0	6778.5	1	1	47.5395	62.8519
DATA	2143	26	18	0	0	A_64_P021597	A_64_P021597	10332	367	9.764803e+000	3.998350e+000	87	60	1.458331e+001	0	0	0	0	0	0	9.49604	1	0	54.9904	60.8889
DATA	2144	26	19	0	0	A_64_P148032	A_64_P148032	10357	367.439	1.647738e+002	1.692654e+001	249	62	1.493344e+001	0	0	0	0	0	0	160.395	1	1	42.5954	62.8485
DATA	2145	26	20	0	0	A_42_P743580	NM_017214	10382	367.118	5.507444e+003	5.507581e+002	5393	63.5	1.054923e+001	0	0	0	0	0	0	5364.74	1	1	46.8651	64.0625
DATA	2146	26	21	0	0	A_42_P693964	NM_181087	10407.4	367.431	1.873113e+003	1.873513e+002	1781	60	1.062442e+001	0	0	0	0	0	0	1825.67	1	1	47.2035	59.2857
DATA	2147	26	22	0	0	A_44_P1058389	NM_012992	10432.8	367.194	1.632629e+004	1.632634e+003	15302	62	1.413564e+001	0	0	0	0	0	0	15918.1	1	1	47.5395	64.3043
DATA	2148	26	23	0	0	A_44_P135224	NM_022187	10458.9	367.065	1.818647e+002	1.859297e+001	258	66	1.548748e+001	0	0	0	0	0	0	177.346	1	1	65	66.1724
DATA	2149	26	24	0	0	A_64_P070249	ENSRNOT00000048236	10483.4	367.4	7.644049e+002	7.653821e+001	816	61	1.360423e+001	0	0	0	0	0	0	745.448	1	1	45.1352	62.6216
DATA	2150	26	25	0	0	A_42_P806899	NM_001108829	10508.5	366.92	3.818437e+001	5.434829e+000	120	63	1.537806e+001	0	0	0	0	0	0	37.2281	1	1	40.2912	64.2121
DATA	2151	26	26	0	0	A_42_P465144	NM_001107714	10535.1	367.386	5.868664e+001	7.029041e+000	145	61	9.063456e+000	0	0	0	1	0	0	57.1991	1	1	65	61.7097
DATA	2152	26	27	0	0	A_43_P19712	NM_001106751	10560.5	367.352	1.599182e+001	4.188089e+000	101.5	61.5	1.154156e+001	0	0	0	0	0	0	15.5779	1	0	57.5363	60.85
DATA	2153	26	28	0	0	A_42_P728472	NM_001007600	10585.1	367.382	9.673162e+003	9.673240e+002	9129.5	60.5	1.046417e+001	0	0	0	0	0	0	9416.29	1	1	46.1809	62.5333
DATA	2154	26	29	66	-1	(-)3xSLv1	NegativeControl	10611.9	368.529	3.889466e+000	3.876382e+000	72	60.5	1.443829e+001	0	0	0	0	0	0	-10.4375	0	0	40.6843	61.5625
DATA	2155	26	30	0	0	A_42_P629394	NM_031683	10635.7	367.611	3.706908e+003	3.707111e+002	3570	52.5	1.392169e+001	0	0	0	0	0	0	3601.62	1	1	48.2044	56.1563
DATA	2156	26	31	0	0	A_64_P041977	A_64_P041977	10662.1	367.386	3.707494e+001	5.370809e+000	119	55	1.586711e+001	0	0	0	0	0	0	35.9747	1	1	57.259	60.9063
DATA	2157	26	32	0	0	A_44_P126406	XM_228958	10687.3	367.78	9.446492e+003	9.446572e+002	9288.5	59	8.821098e+000	0	0	0	0	0	0	9154.07	1	1	43.7019	60.2
DATA	2158	26	33	0	0	A_64_P021878	NM_001167664	10712.6	367.427	6.511780e+001	7.588935e+000	146	63	9.396453e+000	0	0	0	0	0	0	63.0008	1	1	57.5363	60.28
DATA	2159	26	34	0	0	A_64_P058719	NM_001014175	10737.4	367.284	7.489543e+003	7.489645e+002	7050	59	9.722229e+000	0	0	0	0	0	0	7233.77	1	1	46.5243	58
DATA	2160	26	35	0	0	A_42_P495579	NM_001107564	10762.7	367.254	3.751123e+002	3.771458e+001	436.5	59.5	1.197652e+001	0	0	0	0	0	0	361.63	1	1	47.5395	61.46
DATA	2161	26	36	0	0	A_64_P054979	NM_001109615	10789.1	367.567	8.963698e+001	9.783022e+000	171	59	1.360822e+001	0	0	0	0	0	0	86.2388	1	1	46.1809	58.9744
DATA	2162	26	37	0	0	A_44_P713838	ENSRNOT00000032874	10814.5	367.352	1.666975e+002	1.712624e+001	244	56	1.020362e+001	0	0	0	0	0	0	160.025	1	1	57.5363	53.963
DATA	2163	26	38	0	0	A_64_P158913	NM_001108101	10839.6	367.427	1.302447e+002	1.360642e+001	178	60	1.307425e+001	0	0	0	0	0	0	124.748	1	1	57.5363	60.3103
DATA	2164	26	39	0	0	A_43_P13018	NM_054004	10864.4	367.72	1.436156e+004	1.436162e+003	13323	56.5	1.110571e+001	0	0	0	0	0	0	13723.2	1	1	48.8603	56.7647
DATA	2165	26	40	0	0	A_64_P114383	A_64_P114383	10889.7	367.753	2.252552e+004	2.252556e+003	21578.5	55	8.452169e+000	0	0	0	0	0	0	21469.4	1	1	48.2044	56.5714
DATA	2166	26	41	0	0	A_43_P16629	XM_001080634	10915.2	367.554	4.898211e+003	4.898372e+002	4623	57	1.129936e+001	0	0	0	0	0	0	4655.67	1	1	48.8603	57.9714
DATA	2167	26	42	0	0	A_42_P810313	NM_001108677	10941.4	367.427	9.935714e+001	1.070274e+001	179	58	1.258470e+001	0	0	0	0	0	0	94.159	1	1	65	59.9143
DATA	2168	26	43	0	0	A_42_P537516	NM_001106023	10966.2	367.632	1.248763e+004	1.248769e+003	11557	61	1.561003e+001	0	0	0	0	0	0	11800.6	1	1	49.5074	62.3889
DATA	2169	26	44	0	0	A_64_P006964	A_64_P006964	10992.4	367.427	1.564717e+002	1.615108e+001	229.5	64	1.657038e+001	0	0	0	0	0	0	147.388	1	1	65	64.2941
DATA	2170	26	45	0	0	A_42_P829251	NM_133381	11017.6	367.427	2.489567e+001	4.724744e+000	104	69	1.644694e+001	0	0	0	0	0	0	23.3763	1	1	65	68.2424
DATA	2171	26	46	0	0	A_42_P687443	NM_020100	11043	367.455	9.725795e+001	1.052725e+001	175	68	1.134641e+001	0	0	0	0	0	0	91.0218	1	1	65	67.9688
DATA	2172	26	47	0	0	A_44_P196146	NM_031349	11068.4	367.427	1.617284e+002	1.667044e+001	236	66	1.117869e+001	0	0	0	0	0	0	150.843	1	1	57.5363	69.4857
DATA	2173	26	48	0	0	A_64_P050137	ENSRNOT00000058586	11093.3	367.817	2.474439e+002	2.507464e+001	312	62	1.416480e+001	0	0	0	0	0	0	230.017	1	1	47.5395	68.1923
DATA	2174	26	49	0	0	A_44_P637827	NM_001108797	11119.1	367.5	3.738194e+003	3.738415e+002	3396	58	1.040023e+001	0	0	0	0	0	0	3462.08	1	1	56.9804	60.8
DATA	2175	26	50	0	0	A_64_P070073	NM_001109590	11144.5	367.5	1.168004e+002	1.237420e+001	188	56.5	1.103084e+001	0	0	0	0	0	0	107.777	1	1	57.5363	58.125
DATA	2176	26	51	0	0	A_64_P130572	NM_001109400	11169.1	367.47	1.620502e+003	1.621021e+002	1535	66	1.541561e+001	0	0	0	0	0	0	1489.88	1	1	45.1352	66.5
DATA	2177	26	52	0	0	A_42_P658815	NM_198745	11194.4	367.815	1.435454e+003	1.436044e+002	1395	64	1.175678e+001	0	0	0	0	0	0	1314.82	1	1	45.4864	61.8125
DATA	2179	26	54	0	0	A_43_P14809	TC581403	11245.6	367.905	2.038370e+003	2.038792e+002	1891	66.5	9.784111e+000	0	0	0	0	0	0	1852.41	1	1	48.8603	67.1071
DATA	2180	26	55	0	0	A_42_P553319	TC597248	11271	367.96	1.544465e+002	1.599657e+001	220	58	1.305712e+001	0	0	0	0	0	0	139.797	1	1	46.8651	60.2353
DATA	2181	26	56	0	0	A_64_P004162	NM_019139	11296.3	368.137	1.178634e+001	4.345318e+000	93	62	1.208847e+001	0	0	0	0	0	0	10.6257	1	0	40.2912	63.7419
DATA	2182	26	57	0	0	A_64_P032450	NM_172330	11321.5	367.594	2.202698e+002	2.242381e+001	283.5	63	1.225046e+001	0	0	0	0	0	0	197.752	1	1	47.2035	64.5111
DATA	2183	26	58	0	0	A_44_P470976	NM_001013133	11346.9	367.621	4.708240e+001	6.320817e+000	124	60	1.066547e+001	0	0	0	0	0	0	42.0954	1	1	42.9674	59.5676
DATA	2184	26	59	0	0	A_64_P166428	NM_001037205	11373.1	367.5	1.583421e+002	1.639090e+001	222.5	61.5	1.182115e+001	0	0	0	0	0	0	140.962	1	1	56.9804	61.5556
DATA	2185	26	60	0	0	A_43_P11576	NM_012821	11398.5	367.5	1.806820e+001	4.621044e+000	99	62	1.115416e+001	0	0	0	0	0	0	16.018	1	0	65	61.8125
DATA	2186	26	61	0	0	A_64_P156910	A_64_P156910	11423.4	368.174	2.240028e+002	2.280363e+001	286	62	1.304505e+001	0	0	0	0	0	0	197.801	1	1	46.8651	59.6071
DATA	2187	26	62	0	0	A_64_P126140	NM_001191648	11449.3	367.5	8.454693e+001	9.480349e+000	155	66	1.056360e+001	0	0	0	0	0	0	74.3279	1	1	57.5363	66.1944
DATA	2188	26	63	0	0	A_42_P637122	NM_001108351	11474.3	368.167	2.040674e+003	2.041129e+002	1759	73	1.390884e+001	0	0	0	0	0	0	1786.92	1	1	45.835	72.0741
DATA	2189	26	64	0	0	A_64_P081208	NM_001009712	11499.2	368.234	1.074068e+004	1.074077e+003	8991.5	67	1.688826e+001	0	0	0	0	0	0	9366.79	1	1	45.1352	71.1892
DATA	2190	26	65	0	0	A_42_P465608	NM_130894	11524.9	368.172	3.503866e+003	3.504135e+002	3035	64	1.301316e+001	0	0	0	0	0	0	3042.83	1	1	45.4864	67.8649
DATA	2191	26	66	0	0	A_42_P485589	NM_017246	11550	367.556	1.178696e+002	1.256757e+001	181	68	1.556043e+001	0	0	0	0	0	0	101.93	1	1	51.0895	70.7576
DATA	2192	26	67	0	0	A_64_P031383	NM_020308	11575.4	367.811	9.106260e+002	9.116777e+001	848	67	1.077164e+001	0	0	0	0	0	0	784.313	1	1	48.8603	67.8125
DATA	2193	26	68	0	0	A_44_P220647	NM_001107097	11601.1	368.015	8.330265e+001	9.418840e+000	156	66.5	1.178134e+001	0	0	0	0	0	0	71.4574	1	1	46.8651	66
DATA	2194	26	69	0	0	A_44_P294687	NM_080885	11626.1	368.254	4.136253e+002	4.159725e+001	433	64	1.747632e+001	0	0	0	0	0	0	353.435	1	1	45.835	65.4595
DATA	2195	26	70	0	0	A_42_P512838	NM_001106884	11651.6	368.129	1.427702e+003	1.428389e+002	1278	59	1.046222e+001	0	0	0	0	0	0	1215.1	1	1	46.8651	60.3793
DATA	2196	26	71	0	0	A_42_P635228	NM_001107651	11677.4	367.727	4.694465e+001	6.467066e+000	125	66	1.143385e+001	0	0	0	0	0	0	39.7946	1	1	50.1463	64.9063
DATA	2197	26	72	0	0	A_44_P254687	NM_001105728	11703.3	367.5	2.781268e+002	2.816888e+001	319.5	65	1.525144e+001	0	0	0	0	0	0	234.846	1	1	57.5363	67.8387
DATA	2198	26	73	0	0	A_64_P049628	NM_001169145	11727.4	368.106	6.863987e+003	6.864134e+002	5719.5	68	1.493756e+001	0	0	0	0	0	0	5776.38	1	1	45.4864	68.6216
DATA	2199	26	74	0	0	A_64_P007703	NM_031674	11753.9	367.5	1.283668e+002	1.360189e+001	185	71	1.697071e+001	0	0	0	0	0	0	107.609	1	1	65	71.6286
DATA	2200	26	75	0	0	A_42_P645376	NM_001014135	11778.4	368.031	3.212019e+004	3.212022e+003	25837.5	64	1.544226e+001	0	0	0	0	0	0	26838.9	1	1	44.7812	69.2222
DATA	2201	26	76	0	0	A_64_P040920	XM_577408	11804	368.066	4.666537e+003	4.666756e+002	3967	70.5	1.708351e+001	0	0	0	0	0	0	3886.1	1	1	44.0646	74.2105
DATA	2202	26	77	0	0	A_42_P819656	NM_130409	11829.1	367.896	5.920679e+003	5.920854e+002	4848	66	1.590800e+001	0	0	0	0	0	0	4914.58	1	1	46.8651	66.5758
DATA	2203	26	78	0	0	A_64_P018921	NM_001135012	11855.5	367.5	4.904403e+002	4.925533e+001	477	59.5	1.323960e+001	0	0	0	0	0	0	405.755	1	1	57.5363	58.5294
DATA	2204	26	79	0	0	A_43_P15253	NM_012967	11880.3	368.167	4.894664e+002	4.915951e+001	488.5	63	1.186936e+001	0	0	0	0	0	0	403.848	1	1	45.835	62.1034
DATA	2205	26	80	0	0	A_64_P093063	NM_001136272	11905.4	368.087	4.349884e+002	4.373957e+001	436	64	1.626898e+001	0	0	0	0	0	0	357.903	1	1	47.2035	67.7097
DATA	2206	26	81	0	0	A_44_P477406	NM_012751	11931.6	367.573	3.730603e+002	3.758802e+001	387	63	1.085564e+001	0	0	0	0	0	0	306.088	1	1	57.5363	60.5
DATA	2207	26	82	0	0	A_64_P056816	NM_001100697	11957	367.545	1.093037e+002	1.186152e+001	171.5	59	1.234095e+001	0	0	0	0	0	0	89.4624	1	1	55.8519	59.0323
DATA	2208	26	83	0	0	A_42_P580733	NM_001006981	11981.6	368.155	5.199858e+003	5.200063e+002	4324	59	9.245928e+000	0	0	0	0	0	0	4247.3	1	1	47.5395	61.1111
DATA	2209	26	84	66	1	DarkCorner	DarkCorner	12007.6	367.573	4.642092e+000	4.626476e+000	77.5	59	1.165564e+001	0	0	0	0	0	0	-6.24643	0	0	57.5363	62.2188
DATA	2210	26	85	66	1	DarkCorner	DarkCorner	12032.9	368.48	4.649627e+000	4.634138e+000	80	53	1.161260e+001	0	0	0	0	0	0	0.305972	0	0	40.2912	53.4856
DATA	2211	27	1	66	1	DarkCorner	DarkCorner	9887.5	374.352	4.074228e+000	4.076831e+000	83	48	1.121560e+001	0	0	0	0	0	0	3.3828	0	0	57.5363	48.9264
DATA	2212	27	2	66	1	DarkCorner	DarkCorner	9913	374.455	4.056783e+000	4.043136e+000	71.5	52	1.129659e+001	0	0	0	0	0	0	-9.02113	0	0	55.8519	53.2903
DATA	2213	27	3	0	0	A_44_P289922	NM_139103	9937.72	374.361	6.397558e+002	6.410221e+001	671.5	55	7.368780e+000	0	0	0	0	0	0	598.99	1	1	48.2044	54.0323
DATA	2214	27	4	0	0	A_64_P117149	ENSRNOT00000065538	9963.58	374.427	4.024753e+000	4.011213e+000	81	54	1.288608e+001	0	0	0	0	0	0	-0.987538	0	0	65	55.3636
DATA	2215	27	5	0	0	A_42_P524308	NM_019213	9989.42	374.427	9.659957e+002	9.668220e+001	985	56	1.244372e+001	0	0	0	0	0	0	911.466	1	1	57.5363	56.3333
DATA	2216	27	6	0	0	A_64_P037562	XM_001070892	10014.1	374.471	5.834638e+002	5.848214e+001	639.5	53	1.045566e+001	0	0	0	0	0	0	552.411	1	1	47.8731	53.7632
DATA	2217	27	7	0	0	A_44_P267706	XR_085883	10040	374.455	1.887952e+001	4.395161e+000	100	53	8.692612e+000	0	0	0	0	0	0	17.9355	1	0	55.8519	54.1176
DATA	2218	27	8	0	0	A_64_P082569	XM_001053354	10065.4	374.427	1.057607e+001	4.095516e+000	92	58	1.503832e+001	0	0	0	0	0	0	10.0788	1	0	57.5363	61.1795
DATA	2219	27	9	0	0	A_64_P000539	NM_053930	10089.9	374.418	1.901727e+004	1.901731e+003	17647	57	1.452453e+001	0	0	0	0	0	0	18174.5	1	1	46.1809	58.8095
DATA	2220	27	10	0	0	A_43_P22124	NM_213625	10115.4	374.577	1.151130e+003	1.151802e+002	1171	58.5	1.525718e+001	0	0	0	0	0	0	1103.19	1	1	47.8731	61.3077
DATA	2221	27	11	0	0	A_44_P1012556	NM_001013988	10141.5	374.352	1.557429e+002	1.606106e+001	233	57	1.090332e+001	0	0	0	0	0	0	149.646	1	1	57.5363	56
DATA	2222	27	12	0	0	A_64_P115457	NM_001106361	10166.9	374.477	1.189179e+002	1.251960e+001	197.5	55.5	1.125859e+001	0	0	0	0	0	0	114.536	1	1	55.8519	57.1765
DATA	2223	27	13	0	0	A_64_P064229	A_64_P064229	10192.4	374.427	2.332473e+001	4.549695e+000	105	57.5	1.069213e+001	0	0	0	0	0	0	22.5141	1	1	65	60.2647
DATA	2224	27	14	0	0	A_64_P039066	ENSRNOT00000041345	10217.6	374.427	5.206417e+001	6.504326e+000	135	60	1.273514e+001	0	0	0	0	0	0	50.3536	1	1	57.5363	60.5357
DATA	2225	27	15	0	0	A_42_P574960	ENSRNOT00000068719	10242.6	374.722	9.388316e+002	9.396378e+001	1001	60	1.540163e+001	0	0	0	0	0	0	909.63	1	1	48.2044	60.3929
DATA	2226	27	16	0	0	A_42_P600215	NM_175844	10268.4	374.753	4.241983e+001	5.752379e+000	123.5	61	1.153313e+001	0	0	0	0	0	0	41.1672	1	1	48.5334	62.1778
DATA	2227	27	17	0	0	A_42_P607770	NM_001134616	10292.9	374.529	1.053038e+004	1.053045e+003	9771	64.5	1.502664e+001	0	0	0	0	0	0	10233	1	1	47.8731	67.3
DATA	2228	27	18	0	0	A_64_P003348	NM_001077660	10318.5	374.5	5.940810e+002	5.953437e+001	650.5	60	9.444040e+000	0	0	0	0	0	0	578.016	1	1	49.1849	59.0714
DATA	2229	27	19	0	0	A_64_P057828	A_64_P057828	10343.9	374.382	1.068698e+003	1.069399e+002	1131	62.5	1.498508e+001	0	0	0	0	0	0	1040.85	1	1	46.1809	62.4118
DATA	2230	27	20	0	0	A_64_P081765	NM_134355	10370	374.455	2.840845e+001	4.799191e+000	108.5	64	1.531158e+001	0	0	0	0	0	0	27.6924	1	1	65	66
DATA	2231	27	21	0	0	A_42_P758886	NM_019258	10395.5	374.5	2.118215e+002	2.153197e+001	293	64	1.610114e+001	0	0	0	0	0	0	206.618	1	1	57.5363	66.1944
DATA	2232	27	22	0	0	A_42_P745470	XM_001066818	10420.1	374.824	7.680983e+003	7.681080e+002	7295.5	57	1.430827e+001	0	0	0	0	0	0	7496.03	1	1	47.8731	58.32
DATA	2233	27	23	0	0	A_42_P800949	NM_031787	10445.6	375	3.177780e+002	3.201166e+001	386	61.5	1.214350e+001	0	0	0	0	0	0	310.222	1	1	47.8731	62.5227
DATA	2234	27	24	0	0	A_42_P738559	NM_012801	10470.7	374.9	1.816780e+004	1.816784e+003	17295.5	61.5	1.392022e+001	0	0	0	0	0	0	17737.3	1	1	47.2035	61.9286
DATA	2235	27	25	0	0	A_42_P749550	NM_001109359	10496.2	374.391	3.521255e+003	3.521467e+002	3459	62	1.459180e+001	0	0	0	0	0	0	3437.27	1	1	53.8203	63.55
DATA	2236	27	26	0	0	A_64_P007493	ENSRNOT00000006658	10521.6	374.5	2.227771e+001	4.459904e+000	105	63	1.125081e+001	0	0	0	0	0	0	21.741	1	1	47.8731	63.2258
DATA	2237	27	27	0	0	A_64_P056182	NM_053363	10547.7	374.5	1.705521e+003	1.705959e+002	1667	61.5	1.086516e+001	0	0	0	0	0	0	1663.67	1	1	57.5363	61.5
DATA	2238	27	28	0	0	A_42_P818546	NM_001191600	10573.3	374.5	9.968531e+002	9.976032e+001	1059.5	60.5	1.319393e+001	0	0	0	0	0	0	971.781	1	1	57.5363	61.4167
DATA	2239	27	29	0	0	A_44_P407948	XM_001055260	10597.5	374.761	3.036526e+001	4.919557e+000	113	58	1.249343e+001	0	0	0	0	0	0	29.5804	1	1	46.5243	59.7778
DATA	2240	27	30	66	-1	(-)3xSLv1	NegativeControl	10623.9	374.5	3.887717e+000	3.874639e+000	73	62	1.397940e+001	0	0	0	0	0	0	-9.04674	0	0	56.9804	61.931
DATA	2241	27	31	0	0	A_64_P044505	NM_031587	10648.8	374.959	3.799965e+002	3.819709e+001	443	55.5	1.042715e+001	0	0	0	0	0	0	369.404	1	1	46.8651	56.3684
DATA	2242	27	32	0	0	A_42_P685138	NM_153621	10674.7	374.5	6.666170e+002	6.677476e+001	716.5	60	9.547085e+000	0	0	0	1	0	0	647.133	1	1	57.5363	60.9643
DATA	2243	27	33	0	0	A_64_P121747	ENSRNOT00000050332	10700.4	374.732	1.653464e+001	4.226544e+000	98	61	1.159803e+001	0	0	0	0	0	0	16.0282	1	0	47.8731	60.9706
DATA	2244	27	34	0	0	A_42_P791436	NM_012750	10725	375.077	1.206211e+003	1.206840e+002	1225	55	1.008635e+001	0	0	0	0	0	0	1167.5	1	1	46.8651	57.0286
DATA	2245	27	35	0	0	A_44_P349309	NM_001100890	10750.9	374.5	3.744594e+002	3.764879e+001	446	59	1.188943e+001	0	0	0	0	0	0	361.75	1	1	56.9804	60.1071
DATA	2246	27	36	0	0	A_42_P502621	NM_024401	10775.9	375.158	1.090731e+002	1.158697e+001	185	59.5	1.334268e+001	0	0	0	0	0	0	105.182	1	1	47.8731	60.8696
DATA	2247	27	37	0	0	A_43_P21574	NM_001012043	10801.6	374.573	1.509805e+002	1.559829e+001	211.5	56	1.240027e+001	0	0	0	0	0	0	145.275	1	1	57.5363	56.7368
DATA	2248	27	38	0	0	A_44_P496331	NM_001001085	10827.1	374.5	8.385537e+001	9.259704e+000	160	59.5	1.267935e+001	0	0	0	0	0	0	80.5055	1	1	56.9804	59.3929
DATA	2249	27	39	0	0	A_64_P016503	ENSRNOT00000003659	10852.5	374.5	9.247225e+001	1.005034e+001	173	56.5	1.183769e+001	0	0	0	0	0	0	88.5683	1	1	57.5363	57.6316
DATA	2250	27	40	0	0	A_43_P13270	NM_134415	10877.3	374.853	2.415647e+004	2.415650e+003	22360.5	58	1.296132e+001	0	0	0	0	0	0	23081.7	1	1	49.1849	58.0645
DATA	2251	27	41	0	0	A_42_P553960	NM_001107831	10902.8	374.545	9.920687e+003	9.920766e+002	9084.5	56	7.343233e+000	0	0	0	0	0	0	9453.76	1	1	49.5074	56.3333
DATA	2252	27	42	0	0	A_44_P428997	NM_001107661	10927.5	374.886	4.526596e+002	4.543948e+001	509	58	1.555057e+001	0	0	0	0	0	0	430.223	1	1	50.4627	61.9429
DATA	2253	27	43	0	0	A_42_P619926	NM_001106578	10954.1	374.5	1.463999e+002	1.517121e+001	224	57	9.708327e+000	0	0	0	0	0	0	138.713	1	1	65	57.4194
DATA	2255	27	45	0	0	A_44_P524471	NM_001106408	11004.5	375.257	9.629105e+002	9.637423e+001	980	59.5	1.479075e+001	0	0	0	0	0	0	906.947	1	1	47.2035	59.625
DATA	2256	27	46	0	0	A_43_P10009	XM_347035	11029.6	375	5.794282e+003	5.794421e+002	5474	68	1.627755e+001	0	0	0	0	0	0	5439.89	1	1	48.5334	67.5938
DATA	2257	27	47	0	0	A_64_P068112	A_64_P068112	11055	375.226	1.163448e+004	1.163455e+003	11343.5	66	9.695793e+000	0	0	0	0	0	0	10887	1	1	45.4864	66.1429
DATA	2258	27	48	0	0	A_44_P191715	NM_021666	11081	374.545	4.057817e+000	4.044166e+000	81	64	1.193397e+001	0	0	0	0	0	0	-2.32549	0	0	65	67.8333
DATA	2259	27	49	0	0	A_64_P035769	NM_001108962	11105.8	374.831	1.320901e+003	1.321524e+002	1310	61	1.196398e+001	0	0	0	0	0	0	1227.36	1	1	47.2035	64.3667
DATA	2260	27	50	0	0	A_64_P158469	XM_579990	11131.6	374.573	8.960338e+000	4.170425e+000	90	61.5	1.292388e+001	0	0	0	0	0	0	8.29493	1	0	57.5363	63.9412
DATA	2261	27	51	0	0	A_43_P12811	NM_053464	11156.5	374.547	2.219439e+003	2.219816e+002	2089.5	66	1.527898e+001	0	0	0	0	0	0	2047.15	1	1	49.5074	66.7742
DATA	2262	27	52	0	0	A_44_P370694	NM_001107961	11182.6	374.573	1.607163e+001	4.407205e+000	97	65	1.420919e+001	0	0	0	0	0	0	14.7669	1	0	57.5363	64.0882
DATA	2263	27	53	0	0	A_42_P749550	NM_001109359	11207.3	374.84	3.468633e+003	3.468877e+002	3095	62	1.476893e+001	0	0	0	0	0	0	3175.31	1	1	49.1849	62.9394
DATA	2264	27	54	0	0	A_64_P125893	ENSRNOT00000021391	11232.8	375.265	1.820827e+004	1.820832e+003	16133	61	1.019657e+001	0	0	0	0	0	0	16604.6	1	1	46.1809	60.5946
DATA	2265	27	55	0	0	A_44_P1000653	NM_031531	11258.1	375.433	1.442499e+002	1.501035e+001	213	58	8.945835e+000	0	0	0	0	0	0	131.031	1	1	45.835	60.1935
DATA	2266	27	56	0	0	A_64_P035992	A_64_P035992	11284	375.226	6.323371e+002	6.337094e+001	656	61.5	1.467701e+001	0	0	0	0	0	0	572.018	1	1	45.4864	63.8684
DATA	2267	27	57	0	0	A_42_P592385	NM_022935	11309.6	374.573	1.441216e+001	4.426976e+000	96	57	1.388924e+001	0	0	0	0	0	0	12.9824	1	0	57.5363	60.9444
DATA	2268	27	58	0	0	A_64_P065624	ENSRNOT00000039260	11335.2	375.113	2.054976e+001	4.678185e+000	99	60	9.428090e+000	0	0	0	0	0	0	18.4368	1	0	46.8651	62
DATA	2269	27	59	0	1	ERCC-00097_63	ERCC-00097_63	11360.3	374.855	4.434710e+001	6.121754e+000	119	60.5	1.168984e+001	0	0	0	0	0	0	39.6231	1	1	41.8414	61.1176
DATA	2270	27	60	0	0	A_42_P477625	NM_001108719	11384.8	375.169	5.248349e+003	5.248520e+002	4576	63	1.167088e+001	0	0	0	0	0	0	4670.85	1	1	45.835	62.931
DATA	2271	27	61	0	0	A_42_P788030	NM_031618	11410.6	375.29	2.841125e+004	2.841128e+003	24250	63	1.098022e+001	0	0	0	0	0	0	25178.9	1	1	46.8651	61.7391
DATA	2272	27	62	0	0	A_44_P278247	XM_219377	11435.6	375.155	7.832160e+003	7.832276e+002	6663.5	65	1.107664e+001	0	0	0	0	0	0	6912.41	1	1	47.5395	64.2222
DATA	2273	27	63	0	0	A_44_P189262	NM_024000	11461.6	375.081	1.853466e+004	1.853471e+003	15905.5	65	1.158884e+001	0	0	0	0	0	0	16288.1	1	1	48.8603	64.6364
DATA	2274	27	64	0	0	A_44_P212850	NM_019305	11487.4	374.573	5.658151e+001	7.112329e+000	132	77	1.548540e+001	0	0	0	0	0	0	49.5072	1	1	57.5363	74.5185
DATA	2275	27	65	0	0	A_64_P144278	NM_001106525	11511.8	375.169	1.336560e+004	1.336567e+003	11500.5	63	1.041267e+001	0	0	0	0	0	0	11649.5	1	1	45.835	64.069
DATA	2276	27	66	0	0	A_44_P683816	NM_001127488	11537.3	375.242	3.234567e+002	3.263606e+001	363	64	1.513108e+001	0	0	0	0	0	0	280.762	1	1	45.4864	69.1429
DATA	2277	27	67	0	0	A_64_P048712	A_64_P048712	11563.5	374.648	7.948033e+001	9.066771e+000	153.5	66	1.444135e+001	0	0	0	0	0	0	68.6891	1	1	65	68.0541
DATA	2278	27	68	0	0	A_64_P012813	NM_001106456	11588.6	374.573	2.059450e+001	4.840494e+000	99	66	1.118242e+001	0	0	0	0	0	0	17.7268	1	0	57.5363	63.8108
DATA	2280	27	70	0	0	A_42_P598602	NM_001077646	11639.5	374.648	6.468509e+001	7.831921e+000	136	58	1.333336e+001	0	0	0	0	0	0	55.2359	1	1	57.5363	60.6129
DATA	2281	27	71	0	0	A_44_P375380	NM_001191572	11664.6	375.301	1.619805e+002	1.679343e+001	220	66	1.405973e+001	0	0	0	0	0	0	137.807	1	1	47.8731	67.25
DATA	2282	27	72	0	0	A_64_P113555	NM_001000025	11690.5	374.648	1.336792e+001	4.646321e+000	91.5	73.5	1.171771e+001	0	0	0	0	0	0	11.3272	1	0	65	72.2941
DATA	2283	27	73	0	0	A_42_P590466	NM_001009676	11715.2	375.323	4.438690e+003	4.438914e+002	3774	70	1.810387e+001	0	0	0	0	0	0	3748.06	1	1	45.4864	72.4
DATA	2284	27	74	0	0	A_44_P224987	XM_001058317	11740.7	374.747	5.797199e+001	7.327909e+000	129	68	1.332689e+001	0	0	0	0	0	0	48.767	1	1	49.1849	67.4878
DATA	2285	27	75	0	0	A_42_P557315	NM_001106280	11766.5	374.648	5.422739e+003	5.422925e+002	4448.5	63.5	1.828565e+001	0	0	0	0	0	0	4545.25	1	1	57.5363	69.0714
DATA	2286	27	76	0	0	A_44_P375364	A_44_P375364	11792	375	5.594204e+001	7.188023e+000	130	65	1.710435e+001	0	0	0	0	0	0	46.7327	1	1	65	70.9394
DATA	2287	27	77	0	0	A_44_P880152	NM_031553	11817.5	375	1.274953e+002	1.352991e+001	193	71	1.918171e+001	0	0	0	0	0	0	106.155	1	1	54.1152	71.6571
DATA	2288	27	78	0	0	A_64_P057575	NM_001191967	11842.3	375.268	1.782958e+002	1.839909e+001	229	60	1.504318e+001	0	0	0	0	0	0	148.003	1	1	47.5395	60.6216
DATA	2289	27	79	0	0	A_64_P122183	ENSRNOT00000009823	11867.9	375.074	5.519397e+001	7.157099e+000	125	57	1.098367e+001	0	0	0	0	0	0	45.6752	1	1	46.8651	56.1111
DATA	2290	27	80	0	0	A_64_P057587	NM_019313	11893.5	375	8.364080e+001	9.530961e+000	149	64	1.210158e+001	0	0	0	0	0	0	69.0151	1	1	54.1152	65.6552
DATA	2291	27	81	0	0	A_42_P480769	XM_001081609	11918.2	375	5.168529e+002	5.188797e+001	494	63	1.248953e+001	0	0	0	0	0	0	425.352	1	1	46.8651	63.2
DATA	2292	27	82	0	0	A_42_P623151	NM_031026	11943.6	374.973	2.278044e+004	2.278049e+003	17920	61	1.036646e+001	0	0	0	0	0	0	18700.1	1	1	48.5334	61.2778
DATA	2293	27	83	0	0	A_42_P550241	NM_022954	11969.6	374.891	3.976395e+001	6.083799e+000	117	59	9.690657e+000	0	0	0	0	0	0	32.5625	1	1	44.7812	60.2963
DATA	2294	27	84	66	1	DarkCorner	DarkCorner	11995.1	374.871	4.629964e+000	4.614389e+000	80	60.5	1.258735e+001	0	0	0	0	0	0	-1.1332	0	0	51.4001	64.2
DATA	2295	27	85	66	1	DarkCorner	DarkCorner	12018.9	375.792	4.637476e+000	4.621875e+000	77	57	1.136430e+001	0	0	0	0	0	0	-4.82012	0	0	39.0882	57.7442
DATA	2296	28	1	66	1	DarkCorner	DarkCorner	9899.68	382.065	4.061303e+000	4.047640e+000	76	52	1.671104e+001	0	0	0	0	0	0	-4.35483	0	0	44.7812	55.65
DATA	2297	28	2	0	0	A_42_P802550	NM_017365	9925.58	381.573	5.407899e+002	5.422900e+001	585.5	56	1.067927e+001	0	0	0	0	0	0	505.877	1	1	57.5363	55.7586
DATA	2299	28	4	0	0	A_42_P619926	NM_001106578	9975.75	381.831	1.488523e+002	1.541326e+001	226	53	1.427525e+001	0	0	0	0	0	0	140.32	1	1	45.835	56.8205
DATA	2300	28	5	0	0	A_64_P052441	ENSRNOT00000004876	10001.7	381.5	5.575557e+001	6.853439e+000	132	51	1.151962e+001	0	0	0	0	0	0	52.751	1	1	57.5363	55.6923
DATA	2301	28	6	0	0	A_64_P056823	CA510211	10027	381.408	1.061990e+001	4.111363e+000	88	53	9.140441e+000	0	0	0	0	0	0	10.0817	1	0	48.2044	53.5789
DATA	2302	28	7	0	0	A_42_P669870	NM_001011919	10051.7	382.167	3.734018e+003	3.734228e+002	3533	58.5	1.430515e+001	0	0	0	0	0	0	3556.35	1	1	45.835	61.8947
DATA	2303	28	8	0	0	A_42_P683634	NM_012946	10078	381.545	6.604507e+004	6.604508e+003	63307	60.5	1.209068e+001	0	0	0	0	0	0	63095.3	1	1	55.8519	59.5938
DATA	2304	28	9	0	0	A_42_P542809	NM_021671	10102.6	381.932	4.014322e+002	4.033569e+001	454.5	60	1.081007e+001	0	0	0	0	0	0	384.584	1	1	48.5334	60.3704
DATA	2305	28	10	0	0	A_64_P065887	ENSRNOT00000024693	10128.3	382.029	1.696978e+002	1.741781e+001	244.5	53	1.347559e+001	0	0	0	0	0	0	163.015	1	1	46.1809	58.4839
DATA	2306	28	11	0	0	A_64_P043406	NM_001024902	10153.4	382.265	1.391254e+003	1.391805e+002	1369	55.5	1.160586e+001	0	0	0	0	0	0	1339.77	1	1	46.5243	59.0294
DATA	2307	28	12	0	0	A_64_P060769	NM_001191090	10179.2	382.033	1.510842e+003	1.511347e+002	1576	57	1.123059e+001	0	0	0	0	0	0	1458.26	1	1	44.7812	59.8571
DATA	2308	28	13	0	0	A_64_P150789	A_64_P150789	10204.1	381.938	1.240684e+001	4.091251e+000	95	56	1.351097e+001	0	0	0	0	0	0	11.9994	1	0	50.4627	60.5714
DATA	2309	28	14	0	0	A_64_P110254	NM_022404	10229.6	382.343	8.311421e+003	8.311512e+002	8034	56	1.436976e+001	0	0	0	0	0	0	8054.21	1	1	46.8651	58.64
DATA	2310	28	15	0	0	A_42_P700753	FQ212883	10254.8	382.323	2.715894e+003	2.716172e+002	2693	62	1.351678e+001	0	0	0	0	0	0	2636.3	1	1	45.4864	61.3548
DATA	2311	28	16	0	0	A_42_P503768	NM_001009466	10281.4	381.573	3.713690e+002	3.733890e+001	444.5	60	1.148642e+001	0	0	0	0	0	0	361.018	1	1	65	61.9429
DATA	2312	28	17	0	0	A_64_P106021	ENSRNOT00000017892	10305.6	381.896	1.440026e+002	1.491216e+001	222	60	1.026256e+001	0	0	0	0	0	0	140.171	1	1	46.1809	59.9655
DATA	2313	28	18	0	0	A_43_P10861	NM_001024879	10332	381.545	3.039762e+002	3.064289e+001	380	60	1.031099e+001	0	0	0	0	0	0	296.221	1	1	55.8519	58.9762
DATA	2314	28	19	0	0	A_44_P562251	BF545174	10357.4	381.573	8.854931e+001	9.661935e+000	170	63	1.297083e+001	0	0	0	0	0	0	86.3713	1	1	57.5363	62.2558
DATA	2315	28	20	0	0	A_42_P608768	ENSRNOT00000009898	10382.3	382.1	1.757095e+002	1.799047e+001	256.5	59	1.079888e+001	0	0	0	0	0	0	171.527	1	1	47.2035	59.5172
DATA	2316	28	21	0	0	A_64_P117115	NM_001109329	10408.4	381.573	8.106133e+000	3.944754e+000	90	63.5	1.313357e+001	0	0	0	0	0	0	7.91714	1	0	57.5363	61.75
DATA	2317	28	22	0	0	A_64_P043331	ENSRNOT00000032411	10432.7	382.203	1.707945e+002	1.750994e+001	247.5	61	1.023463e+001	0	0	0	0	0	0	166.888	1	1	46.8651	62.0488
DATA	2318	28	23	0	0	A_42_P664274	NM_001079705	10458.9	381.614	1.467878e+003	1.468385e+002	1502	65	1.561151e+001	0	0	0	0	0	0	1434.47	1	1	57.259	66.1724
DATA	2319	28	24	0	0	A_64_P044593	NM_001173451	10483.9	382.206	6.417624e+002	6.429209e+001	717.5	59.5	1.385155e+001	0	0	0	0	0	0	627.219	1	1	46.1809	60.2059
DATA	2320	28	25	0	0	A_64_P006978	NM_001109371	10509.6	381.573	3.835590e+001	5.440926e+000	116	62	1.472887e+001	0	0	0	0	0	0	37.4768	1	1	57.5363	63.4444
DATA	2321	28	26	0	0	A_64_P119390	NM_001109519	10535.1	381.614	1.570660e+001	4.167630e+000	92	61.5	1.070879e+001	0	0	0	0	0	0	15.3413	1	0	65	60.5588
DATA	2322	28	27	0	0	A_64_P034714	A_64_P034714	10560.2	382.082	4.030946e+001	5.582474e+000	120	61	1.119242e+001	0	0	0	0	0	0	39.3545	1	1	44.7812	61.2973
DATA	2323	28	28	0	0	A_44_P535959	NM_001107650	10585.4	382.265	4.116598e+002	4.134699e+001	472	58	1.159477e+001	0	0	0	0	0	0	401.641	1	1	46.5243	57.5652
DATA	2324	28	29	0	0	A_64_P286274	ENSRNOT00000055318	10611.4	381.573	1.855559e+002	1.895456e+001	258.5	57	1.143633e+001	0	0	0	0	0	0	180.859	1	1	57.5363	58.8056
DATA	2325	28	30	0	0	A_44_P333384	NM_001024788	10636.5	382.167	2.295848e+001	4.501563e+000	108	59	1.154782e+001	0	0	0	0	0	0	22.3564	1	1	45.835	59.069
DATA	2326	28	31	0	0	A_42_P522194	NM_012914	10662.1	381.614	1.625905e+002	1.671493e+001	238.5	55.5	1.149543e+001	0	0	0	0	0	0	158.121	1	1	57.259	57.8333
DATA	2327	28	32	0	0	A_44_P273859	NM_017021	10686.6	381.931	1.000071e+001	4.008823e+000	92	60	9.522471e+000	0	0	0	0	0	0	9.71343	1	0	43.3362	59.5128
DATA	2328	28	33	0	0	A_43_P11665	NM_013024	10712.3	382.246	6.046486e+001	7.188565e+000	142	55	1.017231e+001	0	0	0	0	0	0	58.6406	1	1	46.8651	56.8
DATA	2329	28	34	0	0	A_64_P118273	NM_001170593	10738.4	381.573	4.237159e+001	5.755425e+000	123	57.5	1.253329e+001	0	0	0	0	0	0	41.0174	1	1	57.5363	58.75
DATA	2330	28	35	0	0	A_42_P762814	NM_031318	10762.6	382.265	5.537383e+003	5.537520e+002	5130	63	1.270822e+001	0	0	0	0	0	0	5351.62	1	1	46.5243	63.9677
DATA	2331	28	36	0	0	A_44_P384017	NM_031688	10788.2	382.419	8.440456e+002	8.449503e+001	925.5	60	1.349977e+001	0	0	0	0	0	0	814.12	1	1	43.7019	60.3902
DATA	2332	28	37	0	0	A_64_P118872	A_64_P118872	10814.5	382	1.450439e+001	4.177944e+000	97	60	1.241028e+001	0	0	0	0	0	0	13.9582	1	0	54.1152	60.5
DATA	2333	28	38	0	0	A_42_P599210	NM_001008326	10838.7	382.106	1.340157e+003	1.340733e+002	1334	61	1.237077e+001	0	0	0	0	0	0	1286.92	1	1	45.835	61.7297
DATA	2334	28	39	0	0	A_44_P305801	NM_001033894	10865.4	381.931	3.293196e+003	3.293432e+002	3172	58.5	1.044837e+001	0	0	0	0	0	0	3154.25	1	1	53.8203	58.1563
DATA	2335	28	40	0	0	A_64_P085462	A_64_P085462	10890.5	382	6.449024e+004	6.449025e+003	60617	63	1.437894e+001	0	0	0	0	0	0	61614	1	1	54.1152	62.0667
DATA	2336	28	41	0	0	A_42_P488000	NM_001108479	10915.4	381.873	1.792696e+003	1.793133e+002	1736	57.5	1.244645e+001	0	0	0	0	0	0	1708.21	1	1	47.5395	61.1071
DATA	2337	28	42	0	0	A_42_P818546	NM_001191600	10940.5	382.056	1.102548e+003	1.103261e+002	1086	57	1.010400e+001	0	0	0	0	0	0	1047.7	1	1	48.5334	57.1818
DATA	2338	28	43	0	0	A_44_P488489	TC610872	10965.8	382.103	1.500950e+003	1.501477e+002	1438.5	62	1.564414e+001	0	0	0	0	0	0	1422.13	1	1	46.5243	63.7561
DATA	2339	28	44	0	0	A_64_P153971	A_64_P153971	10992.4	381.931	6.290156e+000	4.041617e+000	89	59	1.410603e+001	0	0	0	0	0	0	5.94069	1	0	65	59.8611
DATA	2340	28	45	0	0	A_64_P077985	NM_001170478	11017.5	382	4.360898e+001	5.920818e+000	126	60	1.409093e+001	0	0	0	0	0	0	41.058	1	1	54.1152	61.0357
DATA	2341	28	46	0	0	A_44_P576822	NM_080771	11043	382	1.024093e+003	1.024881e+002	1016	69	1.119507e+001	0	0	0	0	0	0	961.025	1	1	54.9904	67.7273
DATA	2342	28	47	0	0	A_64_P134310	A_64_P134310	11068.5	382	6.725534e+001	7.841359e+000	142	65.5	1.525107e+001	0	0	0	0	0	0	62.9	1	1	54.1152	69.4524
DATA	2343	28	48	0	0	A_64_P134706	NM_001107533	11093.4	381.938	4.133122e+001	5.783442e+000	118	63	1.539328e+001	0	0	0	0	0	0	38.5229	1	1	45.1352	68.1034
DATA	2344	28	49	0	0	A_42_P469751	XM_001054007	11117.9	382.104	4.169782e+003	4.169979e+002	3805	60	1.097164e+001	0	0	0	0	0	0	3873.27	1	1	46.8651	62.4242
DATA	2345	28	50	0	0	A_64_P082653	ENSRNOT00000020906	11143.9	381.987	1.119310e+002	1.191161e+001	184	69	1.495393e+001	0	0	0	0	0	0	103.583	1	1	48.2044	67.8649
DATA	2346	28	51	0	0	A_43_P18902	NM_001109221	11169.9	382.065	1.337572e+002	1.398705e+001	201.5	68	1.625101e+001	0	0	0	0	0	0	123.311	1	1	54.4085	67.9524
DATA	2347	28	52	0	0	A_64_P086719	ENSRNOT00000065918	11195.5	382	1.607497e+001	4.409177e+000	98.5	56	1.483381e+001	0	0	0	0	0	0	14.7628	1	0	65	60.4483
DATA	2348	28	53	0	0	A_64_P138585	TC587165	11219.9	382.222	4.119969e+003	4.120175e+002	3741.5	62	1.051088e+001	0	0	0	0	0	0	3769.79	1	1	47.2035	61.4167
DATA	2349	28	54	0	0	A_64_P230444	ENSRNOT00000010282	11245.9	382.211	5.766092e+003	5.766240e+002	5061.5	62	1.017582e+001	0	0	0	0	0	0	5254.89	1	1	47.2035	62.2121
DATA	2350	28	55	0	0	A_64_P124427	TC642834	11271.5	382	9.639350e+001	1.049640e+001	170	57	8.345967e+000	0	0	0	0	0	0	87.4915	1	1	54.1152	57
DATA	2351	28	56	0	0	A_42_P778587	NM_001135767	11296.2	382.194	3.667556e+002	3.691191e+001	411	63	1.653910e+001	0	0	0	0	0	0	331.597	1	1	47.5395	64.5517
DATA	2352	28	57	0	0	A_42_P526030	NM_057197	11321.4	382	7.739673e+003	7.739786e+002	6640	58.5	1.098612e+001	0	0	0	0	0	0	6969.28	1	1	48.5334	60.1842
DATA	2353	28	58	0	0	A_64_P022561	XM_001070923	11347.1	382.192	1.063891e+002	1.143965e+001	178	57	9.460844e+000	0	0	0	0	0	0	95.4051	1	1	47.5395	58.5152
DATA	2354	28	59	0	0	A_64_P126226	NM_001105901	11373	382	1.427317e+002	1.488467e+001	209	61.5	1.064715e+001	0	0	0	0	0	0	127.453	1	1	54.9904	62.1765
DATA	2355	28	60	0	0	A_64_P089541	NM_001106214	11398.5	382	1.810712e+002	1.859696e+001	247	60	1.248138e+001	0	0	0	0	0	0	161.016	1	1	65	60.4194
DATA	2356	28	61	0	0	A_44_P205869	NM_138891	11423.4	382.324	8.437458e+002	8.448191e+001	785.5	68	6.372934e+000	0	0	0	0	0	0	747.296	1	1	47.8731	67.7143
DATA	2357	28	62	0	0	A_44_P491796	NM_012881	11449.4	382.427	2.160749e+002	2.202640e+001	268	65	8.656081e+000	0	0	0	0	0	0	190.563	1	1	65	62.3143
DATA	2358	28	63	0	0	A_64_P132706	NM_001008304	11474.5	382.352	5.806866e+004	5.806867e+003	48784	70	1.745039e+001	0	0	0	0	0	0	51001.3	1	1	57.5363	71.129
DATA	2359	28	64	0	0	A_64_P040715	NM_001011979	11499.9	382.386	1.124667e+003	1.125492e+002	1064	59.5	1.411573e+001	0	0	0	0	0	0	983.698	1	1	57.259	64.0714
DATA	2360	28	65	0	0	A_44_P191055	NM_001107693	11524.5	382.289	2.769697e+003	2.770035e+002	2352	66	1.476241e+001	0	0	0	0	0	0	2412.8	1	1	49.1849	69.2609
DATA	2361	28	66	0	0	A_64_P077493	XR_005942	11550.3	382.128	2.549277e+001	5.038958e+000	101	66	1.712737e+001	0	0	0	0	0	0	22.1147	1	1	49.8279	67.9545
DATA	2362	28	67	0	0	A_44_P317600	NM_012612	11575.3	382.388	5.541566e+002	5.558720e+001	568	65	1.258547e+001	0	0	0	0	0	0	478.829	1	1	46.1809	63.4138
DATA	2363	28	68	0	0	A_42_P751368	NM_001047874	11600.9	382.329	1.809831e+003	1.810361e+002	1585	68.5	1.184306e+001	0	0	0	0	0	0	1557.44	1	1	46.8651	66.75
DATA	2364	28	69	0	0	A_42_P711568	NM_001107584	11626.3	382.373	8.368780e+003	8.368896e+002	7022	65.5	1.545216e+001	0	0	0	0	0	0	7173.24	1	1	49.1849	68
DATA	2365	28	70	0	0	A_64_P091817	A_64_P091817	11651.9	382.74	1.175039e+003	1.175868e+002	1090	64	1.661517e+001	0	0	0	0	0	0	1003.28	1	1	47.8731	67.7241
DATA	2366	28	71	0	0	A_64_P006628	NM_172328	11677	382.471	9.543111e+001	1.052254e+001	161	71.5	1.244067e+001	0	0	0	0	0	0	81.1677	1	1	47.8731	71.5625
DATA	2367	28	72	0	0	A_64_P057760	NM_001191643	11703.1	382.407	2.629144e+002	2.666545e+001	306	71	1.531603e+001	0	0	0	0	0	0	222.75	1	1	56.9804	73
DATA	2368	28	73	0	0	A_44_P150013	NM_001134495	11728.5	382.352	9.611912e+000	4.569123e+000	88	71	1.612154e+001	0	0	0	0	0	0	8.11356	1	0	65	73.1282
DATA	2369	28	74	0	0	A_44_P526975	NM_001002822	11753.9	382.386	2.437105e+002	2.477992e+001	290	65.5	1.523573e+001	0	0	0	0	0	0	204.986	1	1	57.259	66.025
DATA	2370	28	75	66	-1	(-)3xSLv1	NegativeControl	11779.4	382.427	4.513683e+000	4.498499e+000	77.5	77	1.775257e+001	0	0	0	0	0	0	-7.51227	0	0	65	76.6667
DATA	2371	28	76	0	0	A_42_P648937	NM_001191732	11803.7	382.521	1.227198e+003	1.228027e+002	1075	66	1.749167e+001	0	0	0	0	0	0	1025.34	1	1	48.5334	68.2
DATA	2372	28	77	0	0	A_44_P533786	NM_053749	11830	382.455	6.504303e+001	7.925235e+000	138	67	1.828013e+001	0	0	0	0	0	0	54.1619	1	1	55.8519	69.1143
DATA	2373	28	78	0	0	A_64_P156165	S68987	11854.6	382.5	5.389642e+003	5.389834e+002	4484	54.5	1.180444e+001	0	0	0	0	0	0	4474.6	1	1	48.5334	55.4412
DATA	2374	28	79	0	0	A_64_P084293	NM_001000525	11880.3	382.851	2.247461e+001	5.079122e+000	99.5	62	1.203168e+001	0	0	0	0	0	0	18.6049	1	0	45.835	59.8065
DATA	2375	28	80	0	0	A_42_P708569	NM_001191837	11905.7	382.111	5.250834e+003	5.251033e+002	4348	64	1.391786e+001	0	0	0	0	0	0	4333.87	1	1	45.1352	65.5
DATA	2376	28	81	0	0	A_64_P112215	NM_001110141	11931.6	382.427	3.004299e+002	3.039012e+001	325	64	1.207658e+001	0	0	0	0	0	0	247.322	1	1	57.5363	62.4571
DATA	2377	28	82	0	0	A_42_P567793	NM_001107668	11957	382.455	2.226635e+003	2.227109e+002	1858	61	9.362441e+000	0	0	0	0	0	0	1828.57	1	1	55.8519	61.0303
DATA	2378	28	83	0	0	A_42_P481087	XM_232226	11981.6	382.352	1.475474e+003	1.476191e+002	1274.5	60	1.162075e+001	0	0	0	0	0	0	1209.02	1	1	47.8731	62.4483
DATA	2379	28	84	66	1	DarkCorner	DarkCorner	12007	382.365	4.626551e+000	4.610987e+000	74	64	1.434148e+001	0	0	0	0	0	0	-6.662	0	0	51.4001	63.2963
DATA	2380	28	85	66	1	DarkCorner	DarkCorner	12032.4	383.025	4.634429e+000	4.618838e+000	81	50.5	1.162439e+001	0	0	0	0	0	0	-1.49976	0	0	50.4627	50.8785
DATA	2381	29	1	66	1	DarkCorner	DarkCorner	9887.5	388.648	4.065814e+000	4.052136e+000	81	48	1.115863e+001	0	0	0	0	0	0	-0.495515	0	0	65	48.9918
DATA	2382	29	2	66	1	DarkCorner	DarkCorner	9912.91	388.614	4.048614e+000	4.034994e+000	81	55	1.218139e+001	0	0	0	0	0	0	-1.77245	0	0	65	56.6
DATA	2383	29	3	0	0	A_64_P096512	NM_031782	9937.55	389.464	1.508032e+004	1.508038e+003	13175	56	8.729555e+000	0	0	0	0	0	0	14149.4	1	1	46.1809	55.5
DATA	2384	29	4	0	0	A_44_P172814	NM_173102	9962.8	389.352	3.426323e+004	3.426325e+003	31834	55.5	1.123929e+001	0	0	0	0	0	0	32271.9	1	1	46.8651	57.2647
DATA	2385	29	5	0	0	A_42_P788040	NM_001025053	9989.39	388.931	1.234532e+002	1.297348e+001	196.5	54.5	1.074535e+001	0	0	0	0	0	0	116.722	1	1	53.8203	55.8529
DATA	2386	29	6	0	0	A_42_P808945	NM_181368	10013.7	389.3	2.112773e+003	2.113147e+002	2013.5	50	9.076380e+000	0	0	0	0	0	0	2004.39	1	1	46.8651	51.5455
DATA	2387	29	7	0	0	A_64_P162713	A_64_P162713	10039.9	388.935	3.974434e+000	3.961064e+000	81	56.5	1.424256e+001	0	0	0	0	0	0	-1.99749	0	0	65	60.4737
DATA	2388	29	8	0	0	A_44_P501204	NM_017361	10065.5	389	2.406342e+002	2.438523e+001	333	56.5	1.209152e+001	0	0	0	0	0	0	229.786	1	1	65	58.8947
DATA	2389	29	9	0	0	A_42_P785926	NM_001108289	10089.8	389.194	1.111281e+003	1.111979e+002	1118	57	1.188386e+001	0	0	0	0	0	0	1064.2	1	1	47.5395	55.8846
DATA	2390	29	10	0	0	A_42_P616287	NM_001134555	10115.4	389.157	3.078056e+002	3.102998e+001	371	58.5	1.327867e+001	0	0	0	0	0	0	295.585	1	1	47.5395	58.5667
DATA	2391	29	11	66	-1	(-)3xSLv1	NegativeControl	10141.5	389	3.929446e+000	3.916227e+000	78	54	1.202937e+001	0	0	0	0	0	0	-4.35937	0	0	54.1152	56.5625
DATA	2392	29	12	0	0	A_43_P12365	NM_023101	10166.9	388.935	4.537430e+001	5.987728e+000	131.5	55	1.071793e+001	0	0	0	0	0	0	43.7898	1	1	54.4085	56.8684
DATA	2393	29	13	0	0	A_64_P076643	ENSRNOT00000057620	10192.5	389	3.911562e+000	3.898403e+000	80	56.5	1.176894e+001	0	0	0	0	0	0	-2.28637	0	0	54.1152	60.2857
DATA	2394	29	14	0	0	A_64_P074865	XR_008898	10217.5	389	3.903923e+000	3.892397e+000	83.5	57	1.232146e+001	0	0	0	0	0	0	1.08388	0	0	54.1152	60.1944
DATA	2395	29	15	0	0	A_64_P009582	XM_214287	10242.4	389.188	3.118201e+004	3.118204e+003	28696	64	1.887904e+001	0	0	0	0	0	0	30272.6	1	1	50.1463	67.2222
DATA	2396	29	16	0	0	A_44_P527270	NM_020073	10267.7	389.522	9.977784e+001	1.070470e+001	179	60.5	1.211695e+001	0	0	0	0	0	0	97.0279	1	1	45.835	62
DATA	2397	29	17	0	0	A_44_P530813	NM_012922	10293.4	389.231	5.707636e+002	5.720755e+001	641	63	9.076159e+000	0	0	0	0	0	0	555.809	1	1	45.4864	61.28
DATA	2398	29	18	0	0	A_64_P078210	NM_001044303	10318.8	389.373	2.913687e+001	4.841968e+000	110.5	58.5	9.593739e+000	0	0	0	0	0	0	28.4089	1	1	45.835	58.5263
DATA	2399	29	19	0	0	A_42_P764985	NM_133402	10343.9	389.211	5.848700e+003	5.848827e+002	5420	62	1.245383e+001	0	0	0	0	0	0	5708.3	1	1	47.2035	63.1633
DATA	2400	29	20	0	0	A_43_P23097	NM_001011965	10370	389	3.180006e+001	5.001228e+000	113	58	1.312275e+001	0	0	0	0	0	0	31.063	1	1	54.9904	59.8387
DATA	2401	29	21	0	0	A_43_P19450	NM_001105713	10394.7	389.47	1.751186e+002	1.793164e+001	251	61.5	1.262546e+001	0	0	0	0	0	0	171.182	1	1	45.1352	61.6667
DATA	2402	29	22	0	0	A_42_P514419	NM_001009599	10420.3	389.543	1.416452e+003	1.416976e+002	1433	61	1.212456e+001	0	0	0	0	0	0	1385.3	1	1	46.5243	59.8276
DATA	2403	29	23	0	0	A_64_P123974	A_64_P123974	10446.5	389	3.867509e+000	3.863721e+000	85	65	1.084016e+001	0	0	0	0	0	0	2.60982	0	0	65	63.8649
DATA	2404	29	24	0	0	A_64_P221399	NM_134415	10470.9	389.433	3.319513e+003	3.319737e+002	3281.5	62	1.725114e+001	0	0	0	0	0	0	3247.78	1	1	45.835	64.75
DATA	2405	29	25	0	0	A_44_P760124	A_44_P760124	10496.1	389	3.249255e+002	3.272036e+001	404	62	1.274112e+001	0	0	0	0	0	0	317.863	1	1	46.8651	62.9231
DATA	2406	29	26	0	0	A_42_P589551	NM_001037093	10521.7	389.219	3.241824e+003	3.242053e+002	3124.5	63	1.513127e+001	0	0	0	0	0	0	3170.68	1	1	48.2044	61.6923
DATA	2407	29	27	0	0	A_42_P645467	NM_001108804	10547.2	389.226	4.009273e+001	5.563195e+000	120	61.5	1.232424e+001	0	0	0	0	0	0	39.1963	1	1	45.1352	63.1471
DATA	2408	29	28	0	0	A_64_P036006	A_64_P036006	10573.5	388.854	3.872437e+000	3.867895e+000	84.5	59	1.184914e+001	0	0	0	0	0	0	2.50176	0	0	39.0882	59.5714
DATA	2409	29	29	0	0	A_64_P088575	NM_001106355	10597.8	389.5	4.809141e+002	4.824622e+001	544.5	62.5	1.050850e+001	0	0	0	0	0	0	469.541	1	1	46.1809	60.5
DATA	2410	29	30	0	0	A_42_P798776	XM_002725203	10623.5	389.732	5.454394e+003	5.454531e+002	5296.5	63	9.905787e+000	0	0	0	0	0	0	5320.55	1	1	47.8731	60.2692
DATA	2411	29	31	0	0	A_64_P017424	XM_001067041	10649.5	389.352	3.883109e+000	3.870046e+000	80	62	9.450122e+000	0	0	0	0	0	0	-1.15324	0	0	57.5363	58.7059
DATA	2412	29	32	0	0	A_64_P147358	NM_001105764	10673.7	389.754	2.114656e+003	2.115011e+002	2105.5	60	9.768822e+000	0	0	0	0	0	0	2057.93	1	1	45.1352	59.4667
DATA	2413	29	33	0	0	A_42_P522285	NM_001044263	10699.1	389.382	4.386226e+002	4.403356e+001	502	57.5	1.016292e+001	0	0	0	0	0	0	426.221	1	1	46.1809	57.4722
DATA	2414	29	34	0	0	A_64_P130184	NM_017207	10725	389.5	2.529778e+003	2.530076e+002	2497	52	1.163993e+001	0	0	0	0	0	0	2454.3	1	1	44.4243	56.1081
DATA	2415	29	35	0	0	A_44_P167930	NM_012720	10750.4	389.347	4.048199e+003	4.048386e+002	3810.5	65.5	1.433030e+001	0	0	0	0	0	0	3920.47	1	1	48.2044	64.2333
DATA	2416	29	36	0	0	A_64_P135305	NM_001013426	10775.7	389.527	1.015629e+004	1.015636e+003	9500	64	1.154179e+001	0	0	0	0	0	0	9817.52	1	1	49.1849	64.2903
DATA	2417	29	37	0	0	A_64_P100182	NM_001077678	10801.6	389.427	1.960551e+001	4.373018e+000	96	59	1.377055e+001	0	0	0	0	0	0	18.9116	1	1	57.5363	60.8537
DATA	2418	29	38	0	0	A_44_P521699	NM_001007728	10826.7	389.534	2.906656e+002	2.932935e+001	365.5	61	1.005322e+001	0	0	0	0	0	0	279.775	1	1	48.5334	60.8571
DATA	2419	29	39	0	0	A_64_P053516	NM_001001280	10852.5	389.352	1.104215e+001	4.079068e+000	92	63	1.118969e+001	0	0	0	0	0	0	10.6029	1	0	65	62.2
DATA	2420	29	40	0	0	A_64_P073183	XM_001061392	10877	389.667	6.867399e+003	6.867512e+002	6243	63	1.466019e+001	0	0	0	0	0	0	6578.83	1	1	48.5334	63.7241
DATA	2421	29	41	0	0	A_64_P067447	NM_001109440	10902.4	389.522	1.229242e+003	1.229875e+002	1226	59	1.168048e+001	0	0	0	0	0	0	1174.5	1	1	46.5243	59.9143
DATA	2422	29	42	0	0	A_64_P089251	NM_001014109	10928.6	389.427	1.363233e+002	1.419515e+001	211	61	1.495892e+001	0	0	0	0	0	0	129.884	1	1	57.5363	65.6667
DATA	2423	29	43	0	0	A_64_P118192	NM_022797	10953.5	389.352	7.772435e+002	7.782561e+001	825	57	1.307450e+001	0	0	0	0	0	0	738.442	1	1	47.8731	59.6563
DATA	2424	29	44	0	0	A_64_P082584	ENSRNOT00000024258	10978.8	389.468	1.425077e+002	1.479621e+001	216	65	1.581341e+001	0	0	0	0	0	0	134.996	1	1	42.9674	66.25
DATA	2425	29	45	0	0	A_42_P465677	NM_001106241	11004.1	389.644	3.026207e+002	3.052431e+001	360.5	58	1.028267e+001	0	0	0	0	0	0	285.796	1	1	48.5334	58
DATA	2426	29	46	0	0	A_42_P781999	NM_001106378	11029.6	389.577	2.298504e+004	2.298507e+003	21352	65	1.137232e+001	0	0	0	0	0	0	21637.2	1	1	47.8731	64.3438
DATA	2427	29	47	0	0	A_44_P991472	NM_134374	11054.9	389.732	1.222804e+003	1.223464e+002	1166	69	1.293334e+001	0	0	0	0	0	0	1147.35	1	1	47.5395	67.3077
DATA	2428	29	48	0	0	A_42_P767737	AY724480	11080.4	389.64	4.560293e+003	4.560471e+002	4169	63	1.691218e+001	0	0	0	0	0	0	4264.24	1	1	48.8603	69.4857
DATA	2429	29	49	0	0	A_42_P648200	NM_001037356	11106.4	389.427	1.791994e+002	1.837124e+001	251	63	1.188198e+001	0	0	0	0	0	0	166.959	1	1	57.5363	65.6923
DATA	2430	29	50	0	0	A_64_P006062	NM_001191695	11131.1	389.338	1.600888e+002	1.651597e+001	232	66	1.268947e+001	0	0	0	0	0	0	148.632	1	1	45.835	66.9091
DATA	2431	29	51	0	0	A_42_P728230	NM_001037782	11156.4	389.534	4.498452e+003	4.498637e+002	3943.5	74	1.537787e+001	0	0	0	0	0	0	4161.4	1	1	49.1849	72.1429
DATA	2432	29	52	0	0	A_64_P106011	A_64_P106011	11182.6	389.427	1.270723e+001	4.284564e+000	93	68	1.669969e+001	0	0	0	0	0	0	11.7096	1	0	57.5363	67.2903
DATA	2433	29	53	0	0	A_42_P622661	NM_001024292	11207.5	389.77	2.201645e+003	2.202028e+002	1994.5	60	1.460980e+001	0	0	0	0	0	0	2021.35	1	1	49.1849	61.3846
DATA	2434	29	54	0	0	A_42_P619844	NM_001030037	11232.8	389.87	7.975940e+003	7.976046e+002	7018	61.5	9.734290e+000	0	0	0	0	0	0	7294.71	1	1	49.5074	60.25
DATA	2436	29	56	0	0	A_64_P128260	XM_001056985	11283.2	389.956	1.349803e+003	1.350442e+002	1269	59.5	1.136224e+001	0	0	0	0	0	0	1224.85	1	1	46.5243	59.7143
DATA	2437	29	57	0	0	A_44_P1034950	NM_053294	11309	389.507	3.840695e+002	3.863295e+001	433.5	66	1.577879e+001	0	0	0	0	0	0	347.059	1	1	48.5334	66.9474
DATA	2438	29	58	0	0	A_64_P080316	NM_139113	11334.5	389.338	3.889757e+002	3.912258e+001	428.5	58	8.047707e+000	0	0	0	0	0	0	350.048	1	1	49.8279	59.0323
DATA	2439	29	59	0	0	A_64_P053069	NM_001106820	11359.6	389.563	8.334829e+002	8.345438e+001	816	60	1.296678e+001	0	0	0	0	0	0	747.061	1	1	47.8731	62.3488
DATA	2440	29	60	0	0	A_42_P498066	NM_031136	11385.6	389.427	9.613288e+004	9.613289e+003	86058.5	64	9.762473e+000	0	0	0	0	0	0	85799.6	1	1	57.5363	64.4
DATA	2441	29	61	0	0	A_44_P277068	ENSRNOT00000058491	11410.5	389.817	7.865037e+003	7.865151e+002	7034	63	1.227979e+001	0	0	0	0	0	0	6991.66	1	1	51.0895	61.72
DATA	2442	29	62	0	0	A_44_P685613	XM_225679	11435.7	389.932	1.775594e+003	1.776105e+002	1557	64	1.067369e+001	0	0	0	0	0	0	1571.98	1	1	48.8603	62.8857
DATA	2443	29	63	0	0	A_64_P124364	ENSRNOT00000015807	11461.9	389.5	2.215991e+002	2.256900e+001	277.5	67	1.564204e+001	0	0	0	0	0	0	195.33	1	1	56.9804	67.1875
DATA	2444	29	64	0	0	A_42_P466362	NM_017142	11487.4	389.427	1.083598e+003	1.084450e+002	989	63.5	1.377318e+001	0	0	0	0	0	0	951.153	1	1	57.5363	65.9063
DATA	2445	29	65	0	0	A_64_P081517	ENSRNOT00000037639	11512.6	389.427	9.690831e+001	1.060737e+001	170	58	1.057600e+001	0	0	0	0	0	0	84.7155	1	1	57.5363	58
DATA	2446	29	66	0	0	A_42_P629394	NM_031683	11537.1	389.771	3.553988e+003	3.554252e+002	3033	66	1.674143e+001	0	0	0	0	0	0	3094.73	1	1	46.5243	67.1944
DATA	2447	29	67	0	0	A_44_P500975	NM_001000833	11563.5	389.5	4.322841e+001	6.131783e+000	123.5	58	1.292005e+001	0	0	0	0	0	0	37.4808	1	1	57.5363	60.3143
DATA	2448	29	68	0	0	A_64_P165046	ENSRNOT00000015927	11588.5	389.916	9.462812e+001	1.042133e+001	159	62	1.459319e+001	0	0	0	0	0	0	81.7284	1	1	47.8731	65.3056
DATA	2449	29	69	0	0	A_44_P222865	XM_235305	11613.5	389.853	1.417169e+004	1.417176e+003	12036	63	1.277524e+001	0	0	0	0	0	0	12191.5	1	1	49.8279	61.96
DATA	2451	29	71	0	0	A_64_P131688	XM_574187	11665.1	389.5	3.135610e+001	5.417886e+000	109	70	1.488528e+001	0	0	0	0	0	0	26.7591	1	1	56.9804	71
DATA	2452	29	72	0	0	A_42_P556457	NM_001033931	11689.9	390.172	2.328072e+003	2.328494e+002	1982.5	70	1.444790e+001	0	0	0	0	0	0	1979.71	1	1	45.4864	72.3784
DATA	2453	29	73	0	0	A_42_P734384	NM_001108406	11714.7	389.716	2.560206e+003	2.560593e+002	2127	76	1.611183e+001	0	0	0	0	0	0	2168.97	1	1	48.8603	76.6552
DATA	2454	29	74	0	0	A_42_P728032	XM_001066058	11740.3	389.9	2.166477e+003	2.166938e+002	1917	69.5	1.578574e+001	0	0	0	0	0	0	1828.78	1	1	47.2035	68.7
DATA	2455	29	75	0	0	A_64_P151525	A_64_P151525	11766.5	389.5	5.741437e+001	7.284632e+000	127.5	69	1.378991e+001	0	0	0	0	0	0	48.2847	1	1	57.5363	70.8077
DATA	2456	29	76	0	0	A_43_P19276	ENSRNOT00000039523	11791.6	389.924	6.555362e+002	6.570778e+001	624	67	1.786112e+001	0	0	0	0	0	0	549.49	1	1	45.4864	70.7391
DATA	2457	29	77	0	0	A_44_P529811	NM_001107657	11816.7	389.508	2.869287e+001	5.348153e+000	106.5	66	1.931850e+001	0	0	0	0	0	0	23.9709	1	1	43.3362	68.7273
DATA	2458	29	78	0	0	A_64_P104640	A_64_P104640	11842.1	390.185	3.986475e+004	3.986477e+003	33154.5	60	1.715784e+001	0	0	0	0	0	0	33204.1	1	1	45.835	62.9655
DATA	2459	29	79	0	0	A_64_P003234	NM_001109048	11868.3	389.5	3.059563e+001	5.476203e+000	106	57	1.600774e+001	0	0	0	0	0	0	25.4003	1	1	57.5363	60.4054
DATA	2460	29	80	0	0	A_64_P097158	NM_001000875	11893.5	389.5	4.828335e+000	4.580238e+000	85	62	1.088054e+001	0	0	0	0	0	0	3.99707	1	0	65	61.4688
DATA	2461	29	81	0	0	A_64_P141814	NM_001134629	11918.9	389.5	2.290793e+002	2.335875e+001	272.5	68	1.279586e+001	0	0	0	0	0	0	189.128	1	1	56.9804	66.2821
DATA	2462	29	82	0	0	A_42_P463602	NM_001107592	11944.4	389.573	4.594086e+000	4.583124e+000	83	64	1.149508e+001	0	0	0	0	0	0	1.67066	0	0	65	62.1591
DATA	2463	29	83	0	0	A_64_P083366	NM_001077643	11968.8	390.033	1.885116e+004	1.885121e+003	15420	60	9.541333e+000	0	0	0	0	0	0	15490.7	1	1	44.7812	59.963
DATA	2464	29	84	0	0	A_44_P121039	NM_172008	11994.4	389.857	3.072666e+002	3.106889e+001	328	62	1.267645e+001	0	0	0	0	0	0	251.934	1	1	46.8651	64.6774
DATA	2465	29	85	66	1	DarkCorner	DarkCorner	12019.6	390.194	4.622877e+000	4.607325e+000	81	59.5	1.158164e+001	0	0	0	0	0	0	-1.90278	0	0	44.0646	60.0263
DATA	2466	30	1	66	1	DarkCorner	DarkCorner	9900.42	396.427	4.052443e+000	4.038811e+000	74.5	55	9.564153e+000	0	0	0	0	0	0	-3.42662	0	0	65	54.1111
DATA	2467	30	2	0	0	A_42_P687443	NM_020100	9925.58	396.427	9.496993e+001	1.031366e+001	172	59	8.286535e+000	0	0	0	0	0	0	89.0267	1	1	65	58
DATA	2468	30	3	0	0	A_42_P563382	ENSRNOT00000055321	9951	396.455	2.458634e+003	2.458961e+002	2363	58.5	1.099343e+001	0	0	0	0	0	0	2313.93	1	1	55.8519	56.7857
DATA	2469	30	4	0	0	A_42_P667100	NM_001013932	9975.79	396.301	1.712863e+003	1.713328e+002	1696	51	1.054405e+001	0	0	0	0	0	0	1617.98	1	1	48.2044	54.05
DATA	2470	30	5	0	0	A_42_P553319	TC597248	10001.4	396.543	1.512861e+002	1.564264e+001	223	58	1.237890e+001	0	0	0	0	0	0	143.429	1	1	47.5395	58.3478
DATA	2471	30	6	0	0	A_64_P151358	NM_181695	10027.4	396.427	1.635585e+001	4.287538e+000	97	53	1.032618e+001	0	0	0	0	0	0	15.5604	1	0	57.5363	54.1667
DATA	2472	30	7	0	0	A_44_P196743	ENSRNOT00000007795	10052.6	396.427	3.964030e+000	3.962358e+000	81	60	1.375528e+001	0	0	0	0	0	0	2.89944	0	0	65	62.85
DATA	2474	30	9	0	0	A_64_P127111	NM_001106004	10102.5	396.5	1.018091e+004	1.018099e+003	9802	55	1.117679e+001	0	0	0	0	0	0	9773.11	1	1	49.1849	55.4412
DATA	2475	30	10	0	0	A_42_P470775	NM_001025126	10128.2	396.588	2.136873e+003	2.137232e+002	2069	60	1.257972e+001	0	0	0	0	0	0	2056.83	1	1	46.5243	60.027
DATA	2476	30	11	0	0	A_44_P472855	NM_001000961	10153.8	396.729	1.346640e+002	1.402186e+001	206	54	1.303950e+001	0	0	0	0	0	0	129.945	1	1	46.8651	59.8286
DATA	2477	30	12	0	0	A_64_P080682	NM_001109652	10179.6	396.427	3.911794e+000	3.898634e+000	84	56	1.238819e+001	0	0	0	0	0	0	-1.71692	0	0	57.5363	59.3429
DATA	2478	30	13	0	0	A_42_P727368	NM_001025693	10204.2	397.132	9.823486e+001	1.056579e+001	178.5	60	1.221073e+001	0	0	0	0	0	0	95.2092	1	1	46.1809	61.225
DATA	2479	30	14	0	0	A_64_P034427	A_64_P034427	10230.4	396.427	4.531742e+003	4.531909e+002	4544	57	1.052964e+001	0	0	0	0	0	0	4400.35	1	1	57.5363	60.04
DATA	2480	30	15	0	0	A_64_P042871	A_64_P042871	10255.2	397.078	7.841711e+002	7.851286e+001	866	61	1.297576e+001	0	0	0	0	0	0	762.769	1	1	45.835	62.2963
DATA	2481	30	16	0	0	A_64_P152617	NM_001105747	10281.3	396.5	3.883680e+000	3.881030e+000	85	62	2.103605e+001	0	0	0	0	0	0	2.7678	0	0	57.5363	68.5641
DATA	2482	30	17	0	0	A_44_P468879	NM_001007798	10306.4	396.842	2.748515e+001	4.742944e+000	107.5	61	8.359014e+000	0	0	0	0	0	0	26.8109	1	1	42.9674	61.8387
DATA	2483	30	18	0	0	A_44_P252976	NM_001012071	10331.9	396.5	1.510990e+002	1.559543e+001	231	60	1.351776e+001	0	0	0	0	0	0	147.554	1	1	56.9804	61.7838
DATA	2484	30	19	0	0	A_64_P014080	NM_022189	10357.7	396.914	3.870222e+000	3.859681e+000	85	64	1.322019e+001	0	0	0	0	0	0	1.35199	0	0	46.5243	64.0652
DATA	2485	30	20	0	0	A_44_P204789	NM_001025684	10382.6	396.427	5.441121e+002	5.454757e+001	613	56	9.962894e+000	0	0	0	0	0	0	532.25	1	1	57.5363	58.4815
DATA	2486	30	21	0	0	A_64_P030373	NM_001127319	10408.3	396.5	3.591528e+001	5.266813e+000	117	66	1.793729e+001	0	0	0	0	0	0	35.1532	1	1	57.5363	68.0606
DATA	2487	30	22	0	0	A_42_P558703	NM_001106810	10433	397	8.286763e+002	8.295705e+001	874	66	1.717639e+001	0	0	0	0	0	0	811.461	1	1	46.8651	70.1622
DATA	2488	30	23	0	0	A_44_P241190	NM_001013199	10458.9	396.5	8.329593e+002	8.338485e+001	889.5	65	1.639974e+001	0	0	0	0	0	0	815.772	1	1	56.9804	67.5185
DATA	2489	30	24	0	0	A_42_P539095	XM_001081794	10483.8	397.265	7.192656e+002	7.202950e+001	797	63	1.247532e+001	0	0	0	0	0	0	704.524	1	1	46.1809	64.7568
DATA	2490	30	25	0	0	A_64_P010905	ENSRNOT00000057216	10509.6	396.427	1.769728e+002	1.811133e+001	260.5	62	1.267909e+001	0	0	0	0	0	0	173.298	1	1	57.5363	59.2941
DATA	2491	30	26	0	0	A_44_P500660	NM_001007645	10534.6	396.534	3.975889e+002	3.994502e+001	470	60	1.119325e+001	0	0	0	0	0	0	389.215	1	1	49.1849	59.0256
DATA	2492	30	27	0	0	A_64_P056436	A_64_P056436	10560	396.743	2.622153e+002	2.650317e+001	338	60	1.161634e+001	0	0	0	0	0	0	256.572	1	1	46.8651	61.4242
DATA	2493	30	28	0	0	A_42_P773816	NM_017079	10585.1	396.361	1.376122e+002	1.429133e+001	217	64.5	1.034136e+001	0	0	0	0	0	0	134.553	1	1	48.5334	63.7667
DATA	2494	30	29	0	0	A_64_P138604	NM_001009967	10611.3	396.5	6.020511e+004	6.020513e+003	58212	58	1.061432e+001	0	0	0	0	0	0	58816.5	1	1	57.5363	58.4286
DATA	2495	30	30	0	0	A_42_P705302	NM_001107361	10635.8	397.265	6.605656e+003	6.605769e+002	6319	63.5	8.778366e+000	0	0	0	0	0	0	6447.76	1	1	46.1809	62.0294
DATA	2496	30	31	0	0	A_64_P027259	NM_001191656	10661.4	397.265	2.282933e+004	2.282936e+003	21876	65	1.416381e+001	0	0	0	0	0	0	22257.3	1	1	46.5243	64.6364
DATA	2497	30	32	0	0	A_44_P288333	ENSRNOT00000006659	10687.1	397.143	3.789671e+002	3.809409e+001	460	56	7.169540e+000	0	0	0	0	0	0	368.961	1	1	45.4864	56.3333
DATA	2498	30	33	0	0	A_42_P618217	NM_130752	10712.3	396.879	9.226156e+001	1.000833e+001	172	51.5	1.019156e+001	0	0	0	0	0	0	89.688	1	1	45.835	53.8333
DATA	2499	30	34	0	0	A_64_P151587	A_64_P151587	10738.3	396.5	3.898710e+000	3.885595e+000	75	59.5	1.273727e+001	0	0	0	0	0	0	-7.33562	0	0	57.5363	60.3571
DATA	2500	30	35	0	0	A_42_P771107	NM_001108217	10763.5	396.5	1.105524e+003	1.106209e+002	1151	69.5	1.451832e+001	0	0	0	0	0	0	1070.87	1	1	57.5363	69.6667
DATA	2501	30	36	0	0	A_42_P689013	NM_053800	10788	396.855	2.013954e+004	2.013957e+003	18937.5	63	1.719891e+001	0	0	0	0	0	0	19472.3	1	1	46.8651	65.5625
DATA	2502	30	37	0	0	A_64_P155334	NM_001100945	10813.8	397.265	2.035287e+003	2.035662e+002	2015	65	1.220607e+001	0	0	0	0	0	0	1963.79	1	1	46.1809	66.8
DATA	2503	30	38	0	0	A_64_P049007	A_64_P049007	10839.7	396.5	3.291495e+001	5.116571e+000	112	61	1.236796e+001	0	0	0	0	0	0	31.6818	1	1	57.5363	62.0952
DATA	2504	30	39	0	0	A_44_P351461	ENSRNOT00000027179	10865.3	396.5	3.602181e+001	5.328745e+000	121.5	65.5	1.232981e+001	0	0	0	0	0	0	34.5885	1	1	57.5363	65.9
DATA	2505	30	40	0	0	A_44_P604267	NM_022933	10889.7	397.243	3.330670e+002	3.353844e+001	392	62	1.327191e+001	0	0	0	0	0	0	319.082	1	1	47.5395	61.9118
DATA	2506	30	41	0	0	A_64_P070475	XM_001061514	10915.9	396.5	3.960465e+000	3.947702e+000	83	60	1.339720e+001	0	0	0	0	0	0	0.63529	0	0	56.9804	64.1212
DATA	2507	30	42	0	0	A_64_P119963	A_64_P119963	10940.8	397.061	6.842846e+002	6.854280e+001	724.5	67	1.507746e+001	0	0	0	0	0	0	651.956	1	1	45.835	67.0588
DATA	2508	30	43	0	0	A_42_P658562	NM_001134416	10965.8	397.224	3.974270e+002	3.994037e+001	464	67	1.656609e+001	0	0	0	0	0	0	377.579	1	1	46.1809	67.8108
DATA	2509	30	44	0	0	A_64_P116830	A_64_P116830	10991.8	397.036	6.534231e+001	7.651527e+000	145	61	1.235783e+001	0	0	0	0	0	0	61.8857	1	1	41.8414	62.1818
DATA	2510	30	45	0	0	A_64_P048531	ENSRNOT00000019473	11017.5	396.5	1.113161e+002	1.182651e+001	187	58	1.137995e+001	0	0	0	0	0	0	105.083	1	1	65	59.6452
DATA	2511	30	46	0	0	A_64_P122716	NM_139331	11042.9	396.5	6.094753e+000	4.053271e+000	86	68	1.270797e+001	0	0	0	0	0	0	5.73486	1	0	56.9804	65.7027
DATA	2512	30	47	0	0	A_64_P077323	NM_201992	11068.4	396.573	2.774736e+001	4.885141e+000	105	61	1.315000e+001	0	0	0	0	0	0	26.0216	1	1	65	63.725
DATA	2513	30	48	0	0	A_42_P569711	NM_001108977	11093.4	397.265	4.206637e+002	4.225933e+001	471	65	1.302182e+001	0	0	0	0	0	0	393.22	1	1	46.5243	68.1333
DATA	2514	30	49	0	0	A_42_P474100	NM_001191820	11118.4	397.129	6.007057e+003	6.007193e+002	5443	60.5	1.044193e+001	0	0	0	0	0	0	5595.55	1	1	46.8651	61.9231
DATA	2515	30	50	0	0	A_64_P026404	A_64_P026404	11144.4	396.573	6.640499e+000	4.117237e+000	86.5	72.5	1.395476e+001	0	0	0	0	0	0	6.16203	1	0	57.5363	69.8529
DATA	2516	30	51	0	0	A_64_P026581	ENSRNOT00000029099	11169.7	396.5	4.906886e+003	4.907055e+002	4551.5	73	1.313716e+001	0	0	0	0	0	0	4536.56	1	1	57.5363	74.6571
DATA	2517	30	52	0	0	A_64_P043624	NM_133565	11195.1	397.094	3.214391e+003	3.214651e+002	3029	67	1.789372e+001	0	0	0	0	0	0	2960.96	1	1	45.835	68.5667
DATA	2518	30	53	0	0	A_44_P417429	NM_001011983	11219.8	397.188	3.283722e+003	3.283979e+002	2930	62	1.116157e+001	0	0	0	0	0	0	3013.62	1	1	46.1809	62.25
DATA	2519	30	54	0	0	A_64_P007574	ENSRNOT00000028681	11245.4	397.29	1.814252e+004	1.814256e+003	16067	57.5	8.668631e+000	0	0	0	0	0	0	16585	1	1	46.8651	59.375
DATA	2520	30	55	0	0	A_42_P529690	NM_001173510	11270.7	397.357	2.497946e+004	2.497949e+003	22310	58	8.690959e+000	0	0	0	0	0	0	22745.6	1	1	46.8651	57.0741
DATA	2521	30	56	0	0	A_42_P505070	TC624062	11296.4	397.265	2.646619e+003	2.646946e+002	2419	63	1.348836e+001	0	0	0	0	0	0	2400.18	1	1	46.5243	63.3103
DATA	2522	30	57	0	0	A_42_P504653	NM_017143	11322.4	396.573	4.647324e+001	6.247640e+000	123	64.5	1.287358e+001	0	0	0	0	0	0	41.9655	1	1	57.5363	63.7059
DATA	2523	30	58	0	0	A_64_P017891	A_64_P017891	11347.6	396.573	5.149873e+000	4.223997e+000	84	54	9.087816e+000	0	0	0	0	0	0	4.6316	1	0	57.5363	56.1282
DATA	2524	30	59	0	0	A_42_P642724	NM_001107585	11373	396.545	4.039122e+003	4.039341e+002	3610	64.5	1.139878e+001	0	0	0	0	0	0	3617.7	1	1	55.8519	64.3529
DATA	2525	30	60	0	0	A_42_P780943	NM_001011906	11398.4	396.573	9.464051e+002	9.473486e+001	947	64	9.197332e+000	0	0	0	0	0	0	844.173	1	1	57.5363	63.1818
DATA	2526	30	61	0	0	A_44_P482325	NM_145669	11423.5	397.169	9.490963e+002	9.500447e+001	885.5	63	1.413254e+001	0	0	0	0	0	0	843.227	1	1	47.8731	62.8571
DATA	2527	30	62	0	0	A_42_P716750	NM_001024757	11448.7	397.211	2.372190e+002	2.410162e+001	283.5	64	9.799844e+000	0	0	0	0	0	0	209.894	1	1	47.5395	63.5862
DATA	2528	30	63	0	0	A_64_P009565	NM_001191823	11474.1	397.227	2.471133e+002	2.507910e+001	302	62	1.491503e+001	0	0	0	0	0	0	217.743	1	1	45.835	63.9286
DATA	2529	30	64	0	0	A_42_P495969	NM_012824	11499.2	397.323	1.252137e+004	1.252144e+003	10849	59	1.304531e+001	0	0	0	0	0	0	10988.5	1	1	45.4864	62.1389
DATA	2530	30	65	0	0	A_64_P154671	ENSRNOT00000024704	11525.4	396.573	3.059590e+002	3.089875e+001	352.5	58.5	1.313480e+001	0	0	0	0	0	0	267.32	1	1	57.5363	59.6389
DATA	2531	30	66	0	0	A_44_P111337	NM_001108724	11550.2	397.323	2.993804e+003	2.994117e+002	2575	62	1.497912e+001	0	0	0	0	0	0	2605.74	1	1	45.4864	62.3333
DATA	2532	30	67	0	0	A_42_P665627	NM_023095	11576.1	397.031	6.298075e+001	7.654493e+000	135.5	64	1.438503e+001	0	0	0	0	0	0	54.5871	1	1	45.835	63.9355
DATA	2533	30	68	0	0	A_44_P447585	NM_001166676	11601.5	396.648	1.320310e+001	4.563407e+000	95	60	1.550792e+001	0	0	0	0	0	0	11.3966	1	0	57.5363	63.8684
DATA	2534	30	69	0	0	A_42_P463754	NM_030994	11626.2	397.205	3.669075e+002	3.695180e+001	392	60	1.145495e+001	0	0	0	0	0	0	315.527	1	1	47.5395	61.3023
DATA	2535	30	70	0	0	A_42_P644717	NM_001108927	11652.1	397.058	9.133803e+000	4.495951e+000	88	67	1.406681e+001	0	0	0	0	0	0	7.82327	1	0	46.8651	69.0588
DATA	2536	30	71	0	0	A_42_P546539	NM_001135801	11677.6	396.573	7.328322e+002	7.341637e+001	710	68	1.374937e+001	0	0	0	0	0	0	625.203	1	1	57.5363	69.8293
DATA	2537	30	72	0	0	A_42_P818297	XM_001073988	11702.7	397.1	1.523701e+003	1.524347e+002	1367	79	1.724924e+001	0	0	0	1	0	0	1295.25	1	1	47.2035	79.3333
DATA	2538	30	73	0	0	A_64_P047416	NM_001109501	11727.8	397.13	2.818517e+002	2.853457e+001	320.5	69	1.674946e+001	0	0	0	0	0	0	238.726	1	1	46.5243	71.3125
DATA	2539	30	74	0	0	A_43_P18389	XM_002726292	11753.9	396.935	1.907894e+001	4.858564e+000	100	68	1.286299e+001	0	0	0	0	0	0	16.0997	1	0	54.4085	68.0526
DATA	2540	30	75	0	0	A_64_P044276	NM_001105946	11778.7	397.1	3.802031e+003	3.802295e+002	3239.5	69	1.801176e+001	0	0	0	0	0	0	3197.61	1	1	47.2035	71.931
DATA	2541	30	76	0	0	A_64_P059475	ENSRNOT00000029976	11804.5	397	4.513869e+000	4.498684e+000	73	66.5	2.072768e+001	0	0	0	0	0	0	-7.55396	0	0	65	70.5333
DATA	2542	30	77	0	0	A_64_P005496	A_64_P005496	11830	397	1.376922e+001	4.718652e+000	93.5	65.5	1.850084e+001	0	0	0	0	0	0	11.5033	1	0	54.9904	66.0938
DATA	2544	30	79	0	0	A_42_P739860	NM_133578	11880	397.095	2.256989e+003	2.257445e+002	1852	60.5	1.055622e+001	0	0	0	1	0	0	1874.42	1	1	46.8651	59.7857
DATA	2545	30	80	0	0	A_42_P681251	NM_030844	11905.7	397.1	3.802273e+003	3.802545e+002	3225	65	1.319213e+001	0	0	0	0	0	0	3148.87	1	1	47.2035	66.6154
DATA	2546	30	81	0	0	A_42_P567793	NM_001107668	11930.7	397.1	2.432643e+003	2.433071e+002	1947	64	1.199166e+001	0	0	0	0	0	0	2009.4	1	1	47.2035	63.2
DATA	2547	30	82	0	0	A_64_P041662	NM_182843	11957	397	4.035293e+002	4.061161e+001	415	59	1.237159e+001	0	0	0	0	0	0	332.468	1	1	54.9904	58.9722
DATA	2548	30	83	0	0	A_42_P534679	NM_001134974	11981.9	397.116	2.966144e+003	2.966498e+002	2437.5	61.5	1.131480e+001	0	0	0	0	0	0	2438.45	1	1	46.8651	61.2308
DATA	2549	30	84	66	1	DarkCorner	DarkCorner	12006.7	397.525	4.610854e+000	4.595343e+000	77	65	1.183713e+001	0	0	0	0	0	0	-2.73154	0	0	43.3362	65
DATA	2550	30	85	66	1	DarkCorner	DarkCorner	12033.5	397	4.620440e+000	4.604896e+000	77	51	1.171260e+001	0	0	0	0	0	0	-2.22194	0	0	54.1152	51.7186
DATA	2551	31	1	66	1	DarkCorner	DarkCorner	9887.48	403.769	4.057009e+000	4.043361e+000	79	48	1.137598e+001	0	0	0	0	0	0	-1.89269	0	0	52.6241	49.1951
DATA	2552	31	2	0	0	A_42_P576549	NM_001106490	9912.89	403.5	4.040058e+000	4.041468e+000	86	55	9.260742e+000	0	0	0	0	0	0	3.25772	0	0	56.9804	54.6571
DATA	2553	31	3	0	0	A_42_P542638	NM_001012202	9937.84	404.032	7.031964e+002	7.043389e+001	745	59	9.668453e+000	0	0	0	0	0	0	661.175	1	1	45.4864	58.1429
DATA	2554	31	4	0	0	A_42_P765736	NM_001025670	9963.67	403.5	2.373720e+001	4.646802e+000	103	54.5	1.012431e+001	0	0	0	0	0	0	22.4049	1	1	57.5363	54.8889
DATA	2555	31	5	0	0	A_44_P372461	NM_001170708	9989.33	403.5	6.607411e+002	6.619387e+001	699.5	54	1.049680e+001	0	0	0	0	0	0	625.978	1	1	57.5363	54.6176
DATA	2556	31	6	0	0	A_64_P070554	XM_001059856	10014.5	403.5	3.813664e+001	5.502251e+000	119	55	1.456529e+001	0	0	0	0	0	0	36.2555	1	1	57.5363	55.9091
DATA	2557	31	7	0	0	A_64_P030859	ENSRNOT00000045252	10039	404.234	2.170274e+004	2.170278e+003	20577	57	1.417845e+001	0	0	0	0	0	0	20700.3	1	1	45.4864	60.1622
DATA	2558	31	8	0	0	A_64_P079260	NM_001005546	10064.6	404.379	1.954170e+002	1.993506e+001	277.5	64	1.362212e+001	0	0	0	0	0	0	186.983	1	1	45.1352	61.7073
DATA	2559	31	9	0	0	A_64_P149846	A_64_P149846	10090	404.226	1.736470e+004	1.736474e+003	17006	54.5	1.153944e+001	0	0	0	0	0	0	16663.9	1	1	45.4864	53.4118
DATA	2560	31	10	0	0	A_64_P120624	NM_031634	10116.1	403.5	6.506827e+000	3.972099e+000	91	55	1.125424e+001	0	0	0	0	0	0	6.26126	1	0	65	54.0238
DATA	2561	31	11	0	0	A_64_P158020	NM_001008909	10141.5	403.5	5.526940e+001	6.769263e+000	135.5	52	1.243078e+001	0	0	0	0	0	0	53.3197	1	1	57.5363	56.7037
DATA	2562	31	12	0	0	A_64_P116606	NM_153724	10166	404.156	4.390608e+001	5.872030e+000	124	56	1.081527e+001	0	0	0	0	0	0	42.4582	1	1	37.847	57.5946
DATA	2563	31	13	0	0	A_44_P532436	ENSRNOT00000006946	10192.4	403.573	1.470558e+001	4.159261e+000	96	59.5	1.173974e+001	0	0	0	0	0	0	14.2518	1	0	57.5363	59.6923
DATA	2564	31	14	0	0	A_64_P027545	NM_023095	10217.6	403.573	1.981624e+002	2.019309e+001	275.5	57	1.168160e+001	0	0	0	0	0	0	192.427	1	1	57.5363	60.122
DATA	2565	31	15	0	0	A_64_P076705	NM_017088	10242.3	403.988	1.080853e+005	1.080853e+004	105085	62.5	1.092510e+001	0	0	0	0	0	0	105147	1	1	49.8279	63.1
DATA	2566	31	16	0	0	A_44_P238642	NM_001127201	10267.4	404.29	4.514638e+003	4.514804e+002	4299	59	1.147613e+001	0	0	0	0	0	0	4399.14	1	1	46.8651	61.1111
DATA	2567	31	17	0	0	A_64_P037249	NM_001105802	10293.3	403.908	9.398646e+001	1.016199e+001	177	64	2.878489e+001	0	0	0	0	0	0	91.7104	1	1	45.835	75.3548
DATA	2568	31	18	0	0	A_64_P061524	NM_172064	10319.4	403.573	2.828489e+002	2.854697e+001	355	63	1.064301e+001	0	0	0	0	0	0	276.338	1	1	57.5363	64.6176
DATA	2569	31	19	0	0	A_42_P536564	NM_001008344	10343.8	404.323	3.894115e+003	3.894306e+002	3794	61	1.306437e+001	0	0	0	0	0	0	3808.72	1	1	45.4864	64.4186
DATA	2570	31	20	0	0	A_64_P062433	NM_001135804	10369.5	404.061	6.850690e+002	6.861510e+001	742.5	60	1.194646e+001	0	0	0	0	0	0	670.609	1	1	45.4864	62.303
DATA	2571	31	21	0	0	A_42_P665509	NM_053777	10395.4	403.573	4.913891e+004	4.913893e+003	47524.5	63	1.292103e+001	0	0	0	0	0	0	48131.7	1	1	57.5363	63.4
DATA	2572	31	22	0	0	A_44_P250144	NM_001001373	10420.6	403.573	3.860572e+000	3.851836e+000	86.5	65	1.640428e+001	0	0	0	0	0	0	1.77293	0	0	57.5363	67.2857
DATA	2573	31	23	0	0	A_42_P746838	NM_001024286	10446.4	403.573	2.447932e+001	4.559274e+000	107	67	2.224480e+001	0	0	0	0	0	0	23.9968	1	1	65	76.1778
DATA	2574	31	24	0	0	A_44_P210852	NM_001034187	10471	404.111	1.177756e+002	1.238949e+001	202	63	1.187734e+001	0	0	0	0	0	0	115.477	1	1	46.8651	63.9259
DATA	2575	31	25	0	0	A_64_P019390	A_64_P019390	10497	403.545	1.334943e+001	4.071199e+000	96	66	1.195986e+001	0	0	0	0	0	0	13.0872	1	0	65	65.8529
DATA	2576	31	26	0	0	A_64_P134709	NM_001105760	10521.9	404.164	8.740062e+001	9.549094e+000	169.5	62	1.178519e+001	0	0	0	0	0	0	85.6723	1	1	47.5395	60.1429
DATA	2578	31	28	0	0	A_64_P028117	NM_001000372	10573.4	403.573	2.938612e+001	4.843986e+000	114	65	1.986870e+001	0	0	0	0	0	0	28.7737	1	1	57.5363	70.4063
DATA	2579	31	29	0	0	A_44_P391517	NM_001034144	10598.5	403.648	4.656158e+002	4.672078e+001	536	65	1.047556e+001	0	0	0	0	0	0	455.578	1	1	57.5363	61.8889
DATA	2580	31	30	0	0	A_42_P743682	NM_133599	10623.9	403.614	5.591854e+001	6.793152e+000	137	62	9.422356e+000	0	0	0	0	0	0	54.6623	1	1	57.259	58.931
DATA	2581	31	31	0	0	A_64_P163075	NM_001109321	10649.4	403.573	3.959712e+001	5.530838e+000	122.5	65	1.046805e+001	0	0	0	0	0	0	38.665	1	1	57.5363	64.0714
DATA	2582	31	32	0	0	A_44_P393422	NM_001013188	10674	404.324	1.336404e+003	1.336963e+002	1352	61	1.171537e+001	0	0	0	0	0	0	1303.52	1	1	46.8651	64.2
DATA	2583	31	33	0	0	A_44_P288982	NM_001107913	10699.6	404.31	1.206438e+002	1.267026e+001	195	56	1.092624e+001	0	0	0	0	0	0	117.508	1	1	47.5395	56.871
DATA	2584	31	34	0	0	A_64_P009788	NM_001191099	10725.5	403.648	2.239818e+001	4.478179e+000	103	59	1.505246e+001	0	0	0	0	0	0	21.7788	1	1	65	60.9189
DATA	2585	31	35	0	0	A_42_P764228	NM_031707	10750.2	404.093	4.118410e+003	4.118593e+002	3994.5	68	9.459186e+000	0	0	0	0	0	0	3998.09	1	1	48.2044	67.9286
DATA	2586	31	36	0	0	A_64_P161621	NM_001101015	10776.4	403.573	3.353451e+002	3.375959e+001	412	70.5	1.139939e+001	0	0	0	0	0	0	324.891	1	1	65	71.8846
DATA	2587	31	37	0	0	A_42_P763522	NM_001013980	10800.6	404.299	4.087224e+003	4.087410e+002	3878	66	1.524495e+001	0	0	0	0	0	0	3952.67	1	1	46.1809	69.0571
DATA	2588	31	38	0	0	A_64_P029935	NM_001109299	10826.4	404.29	5.692165e+002	5.705561e+001	629	62	1.457025e+001	0	0	0	0	0	0	549.263	1	1	46.8651	64.2222
DATA	2589	31	39	0	0	A_64_P045053	A_64_P045053	10851.7	404.358	1.931244e+002	1.970556e+001	271	63	1.073085e+001	0	0	0	0	0	0	185.93	1	1	46.1809	62.1795
DATA	2590	31	40	0	0	A_42_P540920	NM_001135045	10876.8	404.449	4.100128e+003	4.100316e+002	3833	65.5	1.466752e+001	0	0	0	0	0	0	3937.93	1	1	46.1809	64.6071
DATA	2591	31	41	0	0	A_64_P055323	NM_001191930	10902.4	404.155	3.256196e+002	3.279902e+001	392	62	1.092693e+001	0	0	0	0	0	0	311.911	1	1	47.5395	64.0909
DATA	2592	31	42	0	0	A_64_P047162	NM_153472	10928	404.103	5.106673e+003	5.106826e+002	4947	66.5	1.494665e+001	0	0	0	0	0	0	4878.33	1	1	46.8651	69.2188
DATA	2593	31	43	0	0	A_64_P279594	NM_001170476	10954	404	1.874422e+001	4.379936e+000	101	69	1.548307e+001	0	0	0	0	0	0	17.8539	1	0	65	69.8235
DATA	2594	31	44	0	0	A_42_P665509	NM_053777	10978.9	404.079	5.499286e+004	5.499287e+003	51491	63	1.481454e+001	0	0	0	0	0	0	52230.2	1	1	51.7088	63.6512
DATA	2595	31	45	0	0	A_64_P106638	NM_001108198	11004.2	404.135	1.026798e+002	1.101310e+001	182	62.5	1.392314e+001	0	0	0	0	0	0	97.2255	1	1	47.8731	63.7813
DATA	2596	31	46	0	0	A_64_P141245	NM_001105920	11029.5	404.12	1.786320e+003	1.786767e+002	1709	63	1.465715e+001	0	0	0	0	0	0	1686.08	1	1	48.8603	65.1429
DATA	2597	31	47	0	0	A_42_P503739	FQ231471	11055	404.211	1.650055e+004	1.650060e+003	14934	63	1.202191e+001	0	0	0	0	0	0	15523.8	1	1	46.8651	63.6809
DATA	2598	31	48	0	0	A_44_P282433	NM_033230	11081	404	8.510125e+002	8.519623e+001	866	64	1.391854e+001	0	0	0	0	0	0	797.84	1	1	54.9904	67.875
DATA	2599	31	49	0	0	A_42_P585750	NM_001202463	11106.5	404	1.755206e+001	4.401050e+000	98.5	60	1.904441e+001	0	0	0	0	0	0	16.3981	1	0	65	65
DATA	2600	31	50	0	0	A_42_P523517	FQ229104	11131.4	404	6.627011e+003	6.627135e+002	6049	73	1.339105e+001	0	0	0	0	0	0	6169.76	1	1	48.5334	70.9655
DATA	2601	31	51	0	0	A_64_P126190	NM_001113789	11157.5	404	3.786785e+001	5.555692e+000	115	73	1.353108e+001	0	0	0	0	0	0	35.1231	1	1	54.1152	72.56
DATA	2602	31	52	0	0	A_42_P549675	NM_080577	11181.5	404.056	4.477396e+003	4.477582e+002	3914.5	73	1.803485e+001	0	0	0	0	0	0	4138.33	1	1	48.5334	75.4545
DATA	2603	31	53	0	0	A_42_P535644	NM_024400	11208	404	6.394551e+002	6.407654e+001	660	64	1.761285e+001	0	0	0	1	0	0	588.691	1	1	54.9904	68.1667
DATA	2604	31	54	0	0	A_64_P050233	XM_345239	11233.5	404	2.376917e+002	2.412216e+001	303	65	1.521763e+001	0	0	0	0	0	0	217.976	1	1	65	67.2821
DATA	2605	31	55	0	0	A_64_P121575	NM_001013144	11258.5	404	6.088716e+001	7.355847e+000	137.5	60	5.691155e+000	0	0	0	0	0	0	55.6221	1	1	65	59.4516
DATA	2606	31	56	0	0	A_64_P018263	NM_012728	11284.4	404.069	2.749952e+002	2.781002e+001	331	70	1.655043e+001	0	0	0	0	0	0	250.205	1	1	53.8203	70.4
DATA	2607	31	57	0	0	A_64_P164682	TC600307	11308.9	404.2	1.051008e+004	1.051016e+003	9521.5	63.5	1.412847e+001	0	0	0	0	0	0	9525.88	1	1	46.8651	63.1842
DATA	2608	31	58	0	0	A_44_P1045612	NM_172317	11334.4	404	4.929725e+002	4.947392e+001	513	65	1.468345e+001	0	0	0	0	0	0	444.981	1	1	48.5334	64.4063
DATA	2609	31	59	0	0	A_42_P529514	NM_001008308	11359.8	404.194	5.967537e+002	5.982257e+001	612	60.5	1.232300e+001	0	0	0	0	0	0	536.487	1	1	46.1809	61.125
DATA	2610	31	60	0	0	A_44_P870348	NM_001107522	11385.1	404.1	3.765827e+002	3.789303e+001	422	66	1.047037e+001	0	0	0	0	0	0	337.159	1	1	46.8651	64.8333
DATA	2611	31	61	0	0	A_64_P108264	XM_223835	11411.1	404.065	8.095131e+001	9.133341e+000	153	64	1.102343e+001	0	0	0	0	0	0	72.1711	1	1	54.4085	64.1143
DATA	2612	31	62	0	0	A_42_P754784	CB328432	11436	404.211	7.469501e+003	7.469622e+002	6423	62	1.510351e+001	0	0	0	0	0	0	6632.6	1	1	46.8651	63.7667
DATA	2613	31	63	0	0	A_64_P084525	NM_001101001	11461	404.203	2.339996e+003	2.340384e+002	2024	61	1.233758e+001	0	0	0	0	0	0	2069.37	1	1	46.8651	62.1818
DATA	2614	31	64	0	0	A_64_P378583	NM_001099516	11487.5	404	1.516233e+001	4.542773e+000	95	63.5	1.438312e+001	0	0	0	0	0	0	13.3505	1	0	54.1152	64.1316
DATA	2615	31	65	0	0	A_64_P154172	NM_001000557	11512.5	404	4.314178e+000	4.299665e+000	78.5	58	1.054513e+001	0	0	0	0	0	0	-4.13926	0	0	54.1152	56.8974
DATA	2616	31	66	0	0	A_64_P074634	NM_001024287	11538.1	404.386	2.270330e+002	2.311011e+001	281.5	58.5	1.180067e+001	0	0	0	0	0	0	198.291	1	1	57.259	59
DATA	2617	31	67	1028	1	(+)E1A_r60_a22	E1A_r60_a22	11563.5	404.352	1.512290e+002	1.573188e+001	211	65.5	1.490541e+001	0	0	0	0	0	0	131.546	1	1	57.5363	64.9667
DATA	2618	31	68	0	0	A_43_P12780	NM_053350	11587.7	404.187	9.213226e+001	1.018919e+001	160	60	1.572383e+001	0	0	0	0	0	0	79.8312	1	1	49.5074	63.1034
DATA	2619	31	69	0	0	A_44_P442169	NM_001013034	11613.7	404.5	3.582559e+003	3.582825e+002	3094.5	57.5	1.347402e+001	0	0	0	0	0	0	3091.79	1	1	49.1849	60.7778
DATA	2620	31	70	0	0	A_64_P093894	A_64_P093894	11639.6	404.355	4.786813e+001	6.492828e+000	120	60.5	1.248339e+001	0	0	0	0	0	0	41.1446	1	1	44.0646	62.0526
DATA	2621	31	71	0	0	A_64_P073378	NM_001025287	11664.3	404.468	1.235518e+003	1.236302e+002	1102	71.5	1.479706e+001	0	0	0	0	0	0	1058.01	1	1	49.8279	72.5789
DATA	2622	31	72	0	0	A_64_P096076	A_64_P096076	11690.5	404.352	4.435449e+000	4.420528e+000	79	70	1.338336e+001	0	0	0	0	0	0	-0.296906	0	0	57.5363	69.0571
DATA	2623	31	73	0	0	A_42_P471835	TC610276	11715.3	404.373	4.437606e+003	4.437828e+002	3710	73	1.913381e+001	0	0	0	0	0	0	3771.48	1	1	49.1849	76.4444
DATA	2624	31	74	0	0	A_42_P767737	AY724480	11740.6	404.325	4.456683e+003	4.456905e+002	3754	67	7.404898e+000	0	0	0	0	0	0	3773.98	1	1	50.1463	66.7586
DATA	2625	31	75	0	0	A_64_P016393	A_64_P016393	11765.9	404.557	4.001134e+003	4.001384e+002	3450.5	68.5	1.533362e+001	0	0	0	0	0	0	3376.54	1	1	47.5395	69
DATA	2626	31	76	0	0	A_42_P803752	XM_580093	11791.5	404.06	2.085676e+001	4.945284e+000	100	66	2.053867e+001	0	0	0	0	0	0	17.5385	1	0	39.8942	67.2647
DATA	2627	31	77	0	0	A_42_P589025	NM_134363	11817.4	404.427	5.607717e+004	5.607719e+003	45103	68	1.698851e+001	0	0	0	0	0	0	47001.2	1	1	57.5363	68.7647
DATA	2628	31	78	0	0	A_64_P107938	NM_001000930	11842.5	404.8	1.119923e+001	4.649258e+000	91	59	1.713554e+001	0	0	0	0	0	0	9.35816	1	0	42.9674	63.6296
DATA	2629	31	79	0	0	A_64_P088817	A_64_P088817	11868.4	404.427	3.839869e+002	3.866459e+001	404	57	1.637826e+001	0	0	0	0	0	0	319.849	1	1	57.5363	64.2258
DATA	2630	31	80	0	0	A_64_P000579	A_64_P000579	11892.8	404.74	2.269234e+004	2.269239e+003	18207.5	62	9.746656e+000	0	0	0	0	0	0	18851.3	1	1	48.5334	63.0513
DATA	2631	31	81	0	0	A_44_P570046	TC630334	11919	404.455	4.172067e+002	4.196825e+001	418.5	69	8.986942e+000	0	0	0	0	0	0	345.597	1	1	55.8519	69.4063
DATA	2632	31	82	0	0	A_44_P431629	NM_001106835	11944.4	404.427	1.100640e+002	1.191494e+001	174	60	1.090038e+001	0	0	0	0	0	0	90.9405	1	1	57.5363	60.8636
DATA	2634	31	84	0	0	A_42_P485932	NM_001034927	11994.4	404.534	1.581033e+004	1.581040e+003	12860	61	1.088469e+001	0	0	0	0	0	0	13005.5	1	1	49.1849	63.0417
DATA	2635	31	85	66	1	DarkCorner	DarkCorner	12020.5	404.352	4.608689e+000	4.593185e+000	73	65	1.292641e+001	0	0	0	0	0	0	-7.81597	0	0	57.5363	64.8491
DATA	2636	32	1	66	1	DarkCorner	DarkCorner	9899.98	410.774	4.044468e+000	4.030862e+000	73	55	9.343784e+000	0	0	0	0	0	0	-5.73596	0	0	41.4593	55.8378
DATA	2637	32	2	0	0	A_64_P048366	ENSRNOT00000059330	9925.09	411.116	9.531174e+002	9.539624e+001	980.5	59.5	8.251061e+000	0	0	0	0	0	0	895.256	1	1	46.8651	60
DATA	2638	32	3	0	0	A_44_P1058980	NM_001012036	9950.3	411.224	2.900739e+003	2.901015e+002	2728.5	55	8.995405e+000	0	0	0	0	0	0	2735.39	1	1	45.835	55.575
DATA	2639	32	4	0	0	A_64_P062562	ENSRNOT00000027655	9976.5	411	1.933956e+001	4.427790e+000	99.5	54.5	9.914439e+000	0	0	0	0	0	0	18.3076	1	0	54.1152	53.7917
DATA	2640	32	5	0	0	A_44_P490100	ENSRNOT00000043641	10001.6	410.931	3.006668e+001	4.979311e+000	110	51	1.075462e+001	0	0	0	0	0	0	28.5629	1	1	65	54.5238
DATA	2641	32	6	0	0	A_42_P473886	NM_001165922	10027.5	411	4.004713e+002	4.024198e+001	468	52	8.906150e+000	0	0	0	0	0	0	381.766	1	1	54.1152	53.0732
DATA	2642	32	7	0	0	A_64_P393339	ENSRNOT00000057753	10052.1	411.493	3.649560e+001	5.372588e+000	115	67	1.525144e+001	0	0	0	0	0	0	34.9016	1	1	47.5395	66.8387
DATA	2643	32	8	0	0	A_44_P461154	NM_053819	10078	411	9.137316e+002	9.145767e+001	980	56	1.138138e+001	0	0	0	0	0	0	876.469	1	1	54.9904	56.05
DATA	2644	32	9	0	0	A_42_P701991	NM_001100671	10102.8	411.194	3.624486e+003	3.624698e+002	3384	55	1.088818e+001	0	0	0	0	0	0	3486.43	1	1	47.5395	56.9459
DATA	2645	32	10	1028	1	(+)E1A_r60_1	E1A_r60_1	10129.5	411.283	3.922100e+000	3.908906e+000	81	54	1.224844e+001	0	0	0	0	0	0	-2.53562	0	0	40.6843	56.2308
DATA	2646	32	11	0	0	A_44_P541230	ENSRNOT00000010675	10153.3	411.246	2.308980e+003	2.309309e+002	2243.5	55	1.428954e+001	0	0	0	0	0	0	2232.39	1	1	45.1352	58.963
DATA	2647	32	12	0	0	A_64_P004593	NM_001166761	10179.5	411	9.388483e+000	4.002553e+000	88	60.5	1.134201e+001	0	0	0	0	0	0	9.09814	1	0	65	61.0625
DATA	2648	32	13	0	0	A_64_P018385	ENSRNOT00000063845	10204.3	411.958	1.160032e+001	4.052041e+000	93.5	60.5	1.122497e+001	0	0	0	0	0	0	11.266	1	0	39.0882	62.25
DATA	2649	32	14	0	0	A_64_P017590	NM_001000096	10230.5	411	3.888432e+000	3.876203e+000	82	55	1.184664e+001	0	0	0	0	0	0	0.7909	0	0	54.1152	57
DATA	2650	32	15	0	0	A_42_P810118	XM_001075984	10255.3	411.417	6.385876e+002	6.397584e+001	699	60.5	1.163506e+001	0	0	0	0	0	0	622.396	1	1	47.5395	59.9333
DATA	2651	32	16	0	0	A_42_P772157	NM_017020	10280.6	411.493	1.469620e+003	1.470128e+002	1475	59	1.316397e+001	0	0	0	0	0	0	1434.55	1	1	45.835	59.96
DATA	2652	32	17	0	0	A_42_P542809	NM_021671	10305.7	411.3	4.016409e+002	4.034893e+001	471.5	69.5	1.644906e+001	0	0	0	0	0	0	392.565	1	1	46.8651	70.4063
DATA	2653	32	18	0	0	A_42_P645352	NM_001126371	10331.3	411.143	5.123500e+003	5.123645e+002	4814	70	1.286589e+001	0	0	0	0	0	0	5013.43	1	1	47.2035	69.7419
DATA	2654	32	19	0	0	A_64_P106933	NM_001130493	10357.5	411	2.473842e+001	4.575944e+000	106	59.5	1.364790e+001	0	0	0	0	0	0	24.2305	1	1	54.1152	61.2895
DATA	2655	32	20	0	0	A_42_P614175	NM_033237	10382.5	411	7.696778e+002	7.706384e+001	821	56.5	1.298648e+001	0	0	0	0	0	0	754.452	1	1	54.1152	59
DATA	2656	32	21	0	0	A_64_P147190	NM_031840	10407.5	411.296	2.939128e+003	2.939379e+002	2979	68	1.604510e+001	0	0	0	0	0	0	2882.79	1	1	47.2035	69.2857
DATA	2657	32	22	0	0	A_43_P11268	NM_031762	10432.7	411.324	4.227559e+003	4.227734e+002	4058.5	73	2.157348e+001	0	0	0	0	0	0	4148.24	1	1	47.5395	78.1569
DATA	2658	32	23	0	0	A_64_P022215	A_64_P022215	10458.9	411.065	8.986037e+001	9.772869e+000	172	77	2.729025e+001	0	0	0	0	1	0	88.192	1	1	54.4085	84.4848
DATA	2659	32	24	0	0	A_64_P001080	NM_001109379	10483.9	411.493	1.204624e+002	1.264392e+001	201	63	1.233965e+001	0	0	0	0	0	0	118.239	1	1	45.1352	63.7273
DATA	2660	32	25	0	0	A_42_P468662	NM_001108886	10508.8	411.194	1.586907e+003	1.587372e+002	1606	66	1.331052e+001	0	0	0	0	0	0	1557.35	1	1	47.5395	65.2069
DATA	2661	32	26	0	0	A_42_P522285	NM_001044263	10534.1	411.104	4.381149e+002	4.397974e+001	497	60	7.769193e+000	0	0	0	0	0	0	429.82	1	1	46.8651	57.973
DATA	2662	32	27	0	0	A_42_P478500	NM_177421	10560.5	411.352	1.521032e+005	1.521032e+004	148732	57	1.144648e+001	0	0	0	0	0	0	149154	1	1	57.5363	59.9143
DATA	2663	32	28	0	0	A_42_P739860	NM_133578	10585	411.347	2.374185e+003	2.374497e+002	2233	65.5	1.628044e+001	0	0	0	0	0	0	2326.69	1	1	48.5334	66.9118
DATA	2664	32	29	0	0	A_42_P708614	NM_001130505	10611.4	411.427	4.980366e+004	4.980368e+003	47703	61	9.292470e+000	0	0	0	0	0	0	48766.1	1	1	57.5363	60
DATA	2665	32	30	0	0	A_64_P067000	NM_001108721	10635.9	412.028	4.783037e+002	4.798540e+001	544	63.5	1.138881e+001	0	0	0	0	0	0	467.935	1	1	46.8651	61.8529
DATA	2666	32	31	0	0	A_44_P590748	NM_001109199	10662.1	411.386	3.772508e+001	5.396700e+000	117	67	1.278449e+001	0	0	0	0	0	0	36.8597	1	1	57.259	65.4643
DATA	2667	32	32	0	0	A_42_P742797	NM_001106761	10686.5	411.614	3.449363e+003	3.449579e+002	3305	60	9.766527e+000	0	0	0	0	0	0	3366.08	1	1	47.5395	60.1667
DATA	2668	32	33	0	0	A_42_P761277	NM_001008297	10711.9	411.282	1.103593e+003	1.104271e+002	1109	58.5	1.429341e+001	0	0	0	0	0	0	1075.3	1	1	47.2035	60.3077
DATA	2669	32	34	0	0	A_42_P503739	FQ231471	10737.5	411.614	1.752723e+004	1.752727e+003	16299.5	65	1.569062e+001	0	0	0	0	0	0	17050.8	1	1	47.5395	64.0645
DATA	2670	32	35	0	0	A_42_P635760	ENSRNOT00000023806	10762.7	411.557	1.110374e+004	1.110381e+003	10607.5	66.5	1.527652e+001	0	0	0	0	0	0	10782.7	1	1	47.5395	66.9211
DATA	2671	32	36	0	0	A_64_P136337	ENSRNOT00000064588	10788.2	411.426	5.333363e+003	5.333504e+002	4857	66.5	1.738638e+001	0	0	0	0	0	0	5169.01	1	1	46.8651	70.3125
DATA	2672	32	37	0	0	A_64_P128316	ENSRNOT00000062007	10814.4	411.427	2.087667e+001	4.422576e+000	104	65	2.028093e+001	0	0	0	0	0	0	20.1899	1	1	57.5363	70.4857
DATA	2673	32	38	0	0	A_64_P050799	A_64_P050799	10839.6	411.427	1.485675e+002	1.536200e+001	228	67	1.698602e+001	0	0	0	0	0	0	143.363	1	1	57.5363	68.4839
DATA	2674	32	39	0	0	A_42_P701779	NM_001108048	10864.4	411.581	1.757645e+003	1.758081e+002	1684.5	61	1.026316e+001	0	0	0	0	0	0	1692.21	1	1	48.8603	62.2414
DATA	2675	32	40	0	0	A_42_P604900	NM_199117	10890.3	411.778	4.180807e+003	4.180992e+002	3939.5	68	1.336758e+001	0	0	0	0	0	0	4015.06	1	1	47.5395	67.3333
DATA	2676	32	41	0	0	A_44_P1060444	NM_001106644	10915.4	411.38	3.491777e+003	3.491998e+002	3200	65	1.285472e+001	0	0	0	0	0	0	3344.41	1	1	47.8731	65.6207
DATA	2677	32	42	0	0	A_64_P090339	NM_001000756	10940.7	412.101	4.894644e+001	6.287805e+000	132	68	1.333408e+001	0	0	0	0	0	0	46.7582	1	1	46.5243	67.3077
DATA	2678	32	43	0	0	A_42_P770556	NM_033096	10965.9	411.653	6.422188e+003	6.422310e+002	5918	68.5	1.550228e+001	0	0	0	0	0	0	6117.08	1	1	48.5334	70.2778
DATA	2679	32	44	0	0	A_44_P606502	NM_001130502	10992.4	411.427	2.077320e+001	4.481676e+000	101.5	63.5	1.487736e+001	0	0	0	0	0	0	19.7238	1	1	57.5363	62.9167
DATA	2680	32	45	0	0	A_64_P372189	NM_212516	11017.5	411.352	5.311065e+004	5.311066e+003	49142.5	58	1.325730e+001	0	0	0	0	0	0	50272.5	1	1	57.5363	60.9737
DATA	2681	32	46	0	0	A_42_P540518	NM_199399	11042.9	411.5	3.258990e+003	3.259235e+002	3017	59	1.188148e+001	0	0	0	0	0	0	3075.02	1	1	56.9804	59.3243
DATA	2682	32	47	0	0	A_64_P158955	ENSRNOT00000020260	11068.4	411.427	1.827970e+001	4.406572e+000	98	63	1.397058e+001	0	0	0	0	0	0	17.1902	1	0	65	64.6744
DATA	2683	32	48	0	0	A_44_P325841	NM_024130	11092.9	411.897	2.464597e+003	2.464925e+002	2345	61	1.303799e+001	0	0	0	0	0	0	2310.29	1	1	46.8651	61.5484
DATA	2684	32	49	0	0	A_64_P007743	XM_001071416	11119.1	411.5	1.334378e+002	1.394116e+001	208	58	1.194918e+001	0	0	0	0	0	0	124.623	1	1	56.9804	60.129
DATA	2685	32	50	0	0	A_64_P136213	A_64_P136213	11144.5	411.5	1.571569e+001	4.345886e+000	90	71.5	1.474695e+001	0	0	0	0	0	0	14.6249	1	0	65	72.1
DATA	2686	32	51	0	0	A_43_P17392	NM_001191693	11169.1	411.377	3.450526e+003	3.450766e+002	3149	71.5	1.294855e+001	0	0	0	0	0	0	3199.56	1	1	46.8651	73.1765
DATA	2687	32	52	0	0	A_42_P708569	NM_001191837	11194.7	411.375	5.349122e+003	5.349278e+002	5018	63	1.622054e+001	0	0	0	0	0	0	4941.42	1	1	44.7812	68.2
DATA	2688	32	53	0	0	A_64_P062068	XM_002728030	11219.7	411.89	3.525467e+002	3.549188e+001	384	66.5	1.513956e+001	0	0	0	0	0	0	324.491	1	1	48.5334	68.7778
DATA	2689	32	54	0	0	A_43_P20266	NM_001106416	11246	411.455	1.430155e+002	1.488134e+001	214	67	1.572806e+001	0	0	0	0	0	0	131.095	1	1	55.8519	69.9211
DATA	2690	32	55	0	0	A_44_P248235	NM_001106048	11271.5	411.5	3.365344e+001	5.327227e+000	112.5	64	1.666674e+001	0	0	0	0	0	0	30.7273	1	1	57.5363	68.9697
DATA	2691	32	56	0	0	A_64_P134717	NM_001101007	11296.7	411.5	9.521921e+000	4.253875e+000	90	63	1.977464e+001	0	0	0	0	0	0	8.6598	1	0	57.5363	67.4167
DATA	2692	32	57	0	0	A_44_P555005	NM_001000944	11322.3	411.5	5.867602e+001	7.194288e+000	131	66	1.280980e+001	0	0	0	0	0	0	53.1471	1	1	57.5363	66.1818
[truncated: 6,320,299 more chars]
