# Supplementary material for: Gene Expression in the Hippocampus in a Rat Model of Premenstrual Dysphoric Disorder After Treatment With Baixiangdan Capsules
Source: Front Psychol. 2018 Nov 13;9:2065. doi: 10.3389/fpsyg.2018.02065 (PMC6242977; doi:10.3389/fpsyg.2018.02065)
Supplement: Supplementary file 2 [file Data_Sheet_2.ZIP › Raw Data Files/21_20.txt]

TYPE	text	text	text	integer	text	float	float	text	integer	text	text	integer	integer	integer	integer	float	float	float	float	float	float	text	text	text	text	text	text	text	text	text	text	text	integer	integer	integer	text	integer	boolean
FEPARAMS	Protocol_Name	Protocol_date	Scan_ScannerName	Scan_NumChannels	Scan_Date	Scan_MicronsPerPixelX	Scan_MicronsPerPixelY	Scan_OriginalGUID	Scan_NumScanPass	Grid_Name	Grid_Date	Grid_NumSubGridRows	Grid_NumSubGridCols	Grid_NumRows	Grid_NumCols	Grid_RowSpacing	Grid_ColSpacing	Grid_OffsetX	Grid_OffsetY	Grid_NomSpotWidth	Grid_NomSpotHeight	Grid_GenomicBuild	FeatureExtractor_Barcode	FeatureExtractor_Sample	FeatureExtractor_ScanFileName	FeatureExtractor_ArrayName	FeatureExtractor_ScanFileGUID	FeatureExtractor_DesignFileName	FeatureExtractor_ExtractionTime	FeatureExtractor_UserName	FeatureExtractor_ComputerName	FeatureExtractor_Version	FeatureExtractor_IsXDRExtraction	FeatureExtractor_ColorMode	FeatureExtractor_QCReportType	DyeNorm_NormFilename	DyeNorm_NormNumProbes	Grid_IsGridFile
DATA	GE1_1100_Jul11 (Read Only)	1-Jul-2011 22:30	Agilent Technologies Scanner G2505C US10450393	1	07-11-2013 11:43:53	5	5	0fda1a09-3af3-4ae3-96a6-827545dd93b4	1	028282_D_F_20120224	24-Feb-2012 00:00	1	1	532	85	73.3235	63.5	0	36.6617	65	65	rn4:RGSCv3.4:Nov2004	1_3		M:\2013.07.11 Rat GE 1-color 4x44k(sunpeng)\\US10450393_S01.tif	US10450393_S01	0c7452c0-a0dc-41af-967f-0c73dacb8676	028282_D_F_20120224.xml	11-Jul-2013 15:20:48	admin	KCSY01	11.0.1.1	0	0	0		0	0
*
TYPE	float	float	float	integer	integer	float	float	float	integer	float	float	float	integer	float	float	integer	integer	integer	integer	integer	float	float	float	integer	float	float	float	float	float	integer	integer	float	float	float	float	float	integer	float	float	float	float	integer	float	float	float	float	float	integer	float	float	float	float	float	float	float	integer	float	integer	float	float	float	float	integer	float	float	float	float	text	float	float	float	float	float	float	float	float	float	float	float	float	float	float	float	float	float	float	float	float	float	integer	integer	integer	integer	float	integer	text	integer	text	float	float	float	integer	boolean	float	float	boolean	float	boolean	float	boolean	float	boolean	float	boolean	float	boolean	float	boolean	float	boolean	float	boolean	float	boolean	float	boolean
STATS	gDarkOffsetAverage	gDarkOffsetMedian	gDarkOffsetStdDev	gDarkOffsetNumPts	gSaturationValue	gAvgSig2BkgeQC	gAvgSig2BkgNegCtrl	gRatioSig2BkgeQC_NegCtrl	gNumSatFeat	gLocalBGInlierNetAve	gLocalBGInlierAve	gLocalBGInlierSDev	gLocalBGInlierNum	gGlobalBGInlierAve	gGlobalBGInlierSDev	gGlobalBGInlierNum	gNumFeatureNonUnifOL	gNumPopnOL	gNumNonUnifBGOL	gNumPopnBGOL	gOffsetUsed	gGlobalFeatInlierAve	gGlobalFeatInlierSDev	gGlobalFeatInlierNum	AnyColorPrcntFeatNonUnifOL	AnyColorPrcntBGNonUnifOL	AnyColorPrcntFeatPopnOL	AnyColorPrcntBGPopnOL	TotalPrcntFeatOL	gNumNegBGSubFeat	gNonCtrlNumNegFeatBGSubSig	gSpatialDetrendRMSFit	gSpatialDetrendRMSFilteredMinusFit	gSpatialDetrendSurfaceArea	gSpatialDetrendVolume	gSpatialDetrendAveFit	gNonCtrlNumSatFeat	gNonCtrl99PrcntNetSig	gNonCtrl50PrcntNetSig	gNonCtrl1PrcntNetSig	gNonCtrlMedPrcntCVBGSubSig	gCtrleQCNumSatFeat	gCtrleQC99PrcntNetSig	gCtrleQC50PrcntNetSig	gCtrleQC1PrcntNetSig	geQCMedPrcntCVBGSubSig	geQCSig2BkgLow2	gNegCtrlNumInliers	gNegCtrlAveNetSig	gNegCtrlSDevNetSig	gNegCtrlAveBGSubSig	gNegCtrlSDevBGSubSig	gAveNumPixOLLo	gAveNumPixOLHi	gPixCVofHighSignalFeat	gNumHighSignalFeat	AddErrorEstimateGreen	TotalNumFeatures	ROIHeight	ROIWidth	CentroidDiffX	CentroidDiffY	NumFoundFeat	MaxNonUnifEdges	MaxSpotNotFoundEdges	gMultDetrendRMSFit	gMultDetrendSurfaceAverage	eQCLowSigName2	eQCOneColorLogLowSignal	eQCOneColorLogLowSignalError	eQCOneColorLogHighSignal	eQCOneColorLinFitLogLowConc	eQCOneColorLinFitLogLowSignal	eQCOneColorLinFitLogHighConc	eQCOneColorLinFitLogHighSignal	eQCOneColorLinFitSlope	eQCOneColorLinFitIntercept	eQCOneColorLinFitRSQ	eQCOneColorSpikeDetectionLimit	gNonCtrl50PrcntBGSubSig	gCtrleQC50PrcntBGSubSig	gMedPrcntCVProcSignal	geQCMedPrcntCVProcSignal	gOutlierFlagger_Auto_FeatB_Term	gOutlierFlagger_Auto_FeatC_Term	gOutlierFlagger_Auto_BgndB_Term	gOutlierFlagger_Auto_BgndC_Term	OutlierFlagger_FeatChiSq	OutlierFlagger_BgndChiSq	GriddingStatus	IsGoodGrid	NumGeneNonUnifOL	TotalNumberOfReplicatedGenes	gPercentileIntensityProcessedSignal	ExtractionStatus	QCMetricResults	gNonCtrlNumWellAboveBG	ImageDepth	AFHold	gPMTVolts	GlassThickness	gDDN	GridHasBeenOptimized	gNegCtrlSpread	Metric_IsGoodGrid	Metric_IsGoodGrid_IsInRange	Metric_AnyColorPrcntFeatNonUnifOL	Metric_AnyColorPrcntFeatNonUnifOL_IsInRange	Metric_gNegCtrlAveNetSig	Metric_gNegCtrlAveNetSig_IsInRange	Metric_gNegCtrlAveBGSubSig	Metric_gNegCtrlAveBGSubSig_IsInRange	Metric_gNegCtrlSDevBGSubSig	Metric_gNegCtrlSDevBGSubSig_IsInRange	Metric_gSpatialDetrendRMSFilteredMinusFit	Metric_gSpatialDetrendRMSFilteredMinusFit_IsInRange	Metric_gNonCntrlMedCVProcSignal	Metric_gNonCntrlMedCVProcSignal_IsInRange	Metric_gE1aMedCVProcSignal	Metric_gE1aMedCVProcSignal_IsInRange	Metric_absGE1E1aSlope	Metric_absGE1E1aSlope_IsInRange	Metric_DetectionLimit	Metric_DetectionLimit_IsInRange	Metric_gDDN	Metric_gDDN_IsInRange
DATA	7.21237	7.21237	1.82218	0	778172	1.11784	2.41481	0.462908	0	37.0312	44.2435	3.95904	43446	44.2435	3.95904	43446	21	635	68	806	7.21237	6178.11	14785.3	43606	0.0474533	0.153658	1.4349	1.8213	0.0419805	3337	2317	13.9434	12.4037	1.01382	25.2001	121.933	0	78704.7	1035.91	87.3033	7.67008	0	306.026	113.413	68.8046	-1	1.26077	146	86.3153	15.9785	-27.2334	8.64142	0.922018	0.506824	0.10257	7475	12.4037	44254	4.40311	7.61742	0.711693	1.04139	42516	0.00588235	0.0789474	0.0654801	1.00132	(+)E1A_r60_3	0	0	0	0	0	0	0	0	0	0	-1	921.45	-2.46555	2.90142	-1	1676	174.556	123.514	72.3712	1.94734	2.50643	0	1	12	30367	5633.97	1	ExtractionEvaluate	34309	20 Bit	0	354	978.841	-1	1	47.1621	1	1	0.0474533	1	86.3153	0	-27.2334	0	8.64142	1	12.4037	1	2.90142	1	-1	0	0	0	-1	0	-1	1
*
TYPE	integer	integer	integer	integer	integer	text	text	float	float	float	float	float	float	float	boolean	boolean	boolean	boolean	boolean	boolean	float	boolean	boolean	float	float
FEATURES	FeatureNum	Row	Col	SubTypeMask	ControlType	ProbeName	SystematicName	PositionX	PositionY	gProcessedSignal	gProcessedSigError	gMedianSignal	gBGMedianSignal	gBGPixSDev	gIsSaturated	gIsFeatNonUnifOL	gIsBGNonUnifOL	gIsFeatPopnOL	gIsBGPopnOL	IsManualFlag	gBGSubSignal	gIsPosAndSignif	gIsWellAboveBG	SpotExtentX	gBGMeanSignal
DATA	1	1	1	260	1	GE_BrightCorner	GE_BrightCorner	6729.5	181	5.156203e+004	5.156228e+003	39068	37	8.278173e+000	0	0	0	0	0	0	39847.4	1	1	54.1152	37.3959
DATA	2	1	2	66	1	DarkCorner	DarkCorner	6755	181	1.599304e+001	1.593080e+001	102	37	8.021189e+000	0	0	0	0	0	0	-8.93902	0	0	54.9904	37.2896
DATA	3	1	3	66	1	DarkCorner	DarkCorner	6780.5	181	1.587443e+001	1.581265e+001	98.5	38	8.067322e+000	0	0	0	0	0	0	-10.3501	0	0	54.1152	38.1778
DATA	4	1	4	66	1	DarkCorner	DarkCorner	6805.29	181.435	1.575920e+001	1.569787e+001	96.5	35	8.428181e+000	0	0	0	0	0	0	-12.6022	0	0	46.1809	35.994
DATA	5	1	5	66	1	DarkCorner	DarkCorner	6831.42	181.427	1.564066e+001	1.557978e+001	93	35	8.501759e+000	0	0	0	0	0	0	-15.3533	0	0	57.5363	35.6935
DATA	6	1	6	66	1	DarkCorner	DarkCorner	6856.5	181.352	1.552859e+001	1.546815e+001	93	35	8.972968e+000	0	0	0	0	0	0	-16.8674	0	0	57.5363	35.6327
DATA	7	1	7	66	1	DarkCorner	DarkCorner	6881.91	181.386	1.541637e+001	1.535636e+001	98	35	9.167011e+000	0	0	0	0	0	0	-12.5888	0	0	57.259	36.2071
DATA	8	1	8	66	1	DarkCorner	DarkCorner	6907.42	181.427	1.530544e+001	1.524587e+001	94	37	9.661809e+000	0	0	0	0	0	0	-14.4664	0	0	57.5363	37.3294
DATA	9	1	9	66	1	DarkCorner	DarkCorner	6932.82	181.354	1.519701e+001	1.513787e+001	91	36	8.624522e+000	0	0	0	0	0	0	-15.2774	0	0	50.4627	36.2224
DATA	10	1	10	66	1	DarkCorner	DarkCorner	6957.7	181.084	1.509309e+001	1.503435e+001	94	36	8.763072e+000	0	0	0	0	0	0	-14.281	0	0	50.7771	36.6823
DATA	11	1	11	66	1	DarkCorner	DarkCorner	6983.5	181.352	1.498592e+001	1.492760e+001	103.5	35	8.964435e+000	0	0	0	0	0	0	-5.80655	0	0	57.5363	36.2982
DATA	12	1	12	0	0	A_64_P076162	A_64_P076162	7008.73	181.657	1.329244e+002	1.991162e+001	219	35	8.534513e+000	0	0	0	0	0	0	111.214	1	1	47.5395	35.4357
DATA	13	1	13	0	0	A_64_P002176	NM_001170551	7034.12	181.343	8.071330e+002	8.204555e+001	792	35	8.610967e+000	0	0	0	0	0	0	679.88	1	1	45.835	35.6349
DATA	14	1	14	0	0	A_42_P664913	NM_001108400	7059.69	181.479	1.780256e+003	1.786254e+002	1563	36	8.866574e+000	0	0	0	1	0	0	1509.77	1	1	48.5334	36.6206
DATA	15	1	15	0	0	A_43_P13320	NM_138880	7085.11	181.5	4.935289e+001	1.534477e+001	151	37	9.038443e+000	0	0	0	0	0	0	42.1323	1	0	56.9804	37.3243
DATA	16	1	16	0	0	A_64_P126523	A_64_P126523	7110.74	181.705	8.301426e+001	1.665094e+001	181.5	38	9.098022e+000	0	0	0	0	0	0	71.3375	1	1	44.4243	38.8745
DATA	17	1	17	0	0	A_64_P038045	XM_002730109	7135.89	181.5	6.433106e+001	1.571983e+001	161	39	9.749825e+000	0	0	0	0	0	0	55.6321	1	0	56.9804	39.9898
DATA	18	1	18	0	0	A_43_P11804	NM_017066	7161.42	181.427	4.911933e+004	4.911954e+003	41987.5	39	9.580669e+000	0	0	0	0	0	0	42746	1	1	57.5363	39.9466
DATA	19	1	19	0	0	A_44_P808710	XM_001069205	7186.56	181.973	1.410399e+003	1.417495e+002	1325	38	8.948306e+000	0	0	0	0	0	0	1234.99	1	1	48.5334	37.5891
DATA	20	1	20	0	0	A_64_P142111	NM_001100887	7211.39	181.973	4.501468e+002	4.716591e+001	497	38	8.964652e+000	0	0	0	0	0	0	396.499	1	1	49.1849	38.1383
DATA	21	1	21	0	0	A_64_P095642	A_64_P095642	7237.31	181.662	2.017339e+002	2.455406e+001	283.5	39	9.781412e+000	0	0	0	0	0	0	178.761	1	1	48.5334	39.4314
DATA	22	1	22	0	0	A_42_P735279	NM_001004446	7262.67	181.5	6.682201e+004	6.682216e+003	59286	38	1.013973e+001	0	0	0	1	0	0	59554.4	1	1	57.5363	38.5884
DATA	23	1	23	0	0	A_44_P902822	XM_001063709	7288.33	181.5	2.000786e+002	2.432712e+001	287.5	36	9.819321e+000	0	0	0	0	0	0	179.339	1	1	57.5363	37.0819
DATA	24	1	24	0	0	A_42_P563843	NM_022263	7313.67	181.685	2.254107e+001	1.394541e+001	126	36	9.376153e+000	0	0	0	0	0	0	20.3163	1	0	48.2044	36.4806
DATA	25	1	25	0	0	A_42_P610788	NM_031544	7339.26	181.778	1.128748e+004	1.128831e+003	9958	35	9.243216e+000	0	0	0	0	0	0	10228.6	1	1	47.5395	36.5098
DATA	26	1	26	0	0	A_44_P242429	NM_001134842	7364.44	181.972	3.911036e+003	3.913405e+002	3599	35	9.128558e+000	0	0	0	0	0	0	3562.61	1	1	48.2044	36.1158
DATA	27	1	27	0	0	A_64_P020571	NM_001031659	7389.79	181.875	1.069193e+003	1.077743e+002	1048	35	8.609691e+000	0	0	0	0	0	0	978.871	1	1	47.5395	35.4139
DATA	28	1	28	0	0	A_42_P518462	NM_001007020	7415.21	182.03	1.740502e+004	1.740554e+003	15995	35	9.274750e+000	0	0	0	0	0	0	16013.5	1	1	46.1809	35.3036
DATA	29	1	29	0	0	A_42_P469751	XM_001054007	7440.74	181.729	1.001442e+004	1.001532e+003	9127.5	34	9.573384e+000	0	0	0	1	0	0	9257.72	1	1	46.8651	34.2015
DATA	30	1	30	0	0	A_44_P209459	NM_022387	7466.17	181.829	1.138517e+004	1.138595e+003	10464	34	7.937587e+000	0	0	0	0	0	0	10573.6	1	1	46.8651	33.9183
DATA	31	1	31	0	0	A_64_P018547	NM_001108717	7491.54	181.878	1.317649e+003	1.324341e+002	1302	35	8.305122e+000	0	0	0	0	0	0	1229.16	1	1	48.8603	35.37
DATA	32	1	32	0	0	A_64_P111513	A_64_P111513	7516.27	181.701	4.756269e+001	1.406997e+001	151	36	8.121749e+000	0	0	0	0	0	0	44.5528	1	0	49.8279	36.1534
DATA	33	1	33	0	0	A_42_P493925	NM_198785	7542.3	182.254	1.670648e+003	1.675843e+002	1653	36	8.756932e+000	0	0	0	0	0	0	1571.6	1	1	45.835	36.326
DATA	34	1	34	0	0	A_64_P049828	NM_012543	7567.23	181.855	5.021125e+003	5.022842e+002	4819.5	37	9.125228e+000	0	0	0	0	0	0	4741.55	1	1	51.0895	36.7985
DATA	35	1	35	0	0	A_64_P137927	NM_001191885	7592.91	181.614	4.556198e+002	4.740381e+001	539	37	9.278174e+000	0	0	0	0	0	0	431.884	1	1	57.259	37.7888
DATA	36	1	36	0	0	A_43_P19848	NM_001106018	7618.42	181.573	9.633824e+001	1.621139e+001	196	38	9.006030e+000	0	0	0	0	0	0	91.649	1	1	57.5363	37.7472
DATA	37	1	37	0	0	A_44_P308673	NM_139108	7643.58	181.573	1.037495e+003	1.045601e+002	1079	38	1.008335e+001	0	0	0	0	0	0	990.339	1	1	57.5363	37.9831
DATA	38	1	38	0	0	A_64_P004269	NM_001191660	7669.3	181.9	4.356694e+003	4.358619e+002	4163.5	36	8.804317e+000	0	0	0	0	0	0	4172.42	1	1	47.2035	36.7602
DATA	39	1	39	0	0	A_42_P543670	NM_012572	7694.5	182	2.813598e+002	3.095739e+001	378	36	9.203150e+000	0	0	0	0	0	0	270.279	1	1	48.5334	36.6784
DATA	40	1	40	0	0	A_64_P164696	TC605704	7719.91	181.935	1.619553e+001	1.297670e+001	120	37	9.554531e+000	0	0	0	0	0	0	15.6024	1	0	54.4085	37.4816
DATA	41	1	41	0	0	A_64_P055763	NM_001191822	7745.35	181.914	1.126504e+004	1.126577e+003	10858.5	36	9.861610e+000	0	0	0	0	0	0	10881.8	1	1	49.5074	37.0097
DATA	42	1	42	0	0	A_64_P068622	NM_001013056	7770.84	182.103	3.570224e+003	3.572521e+002	3528.5	36	9.269515e+000	0	0	0	0	0	0	3457.49	1	1	46.5243	36.626
DATA	43	1	43	0	0	A_44_P915877	XM_001065403	7795.91	182.082	6.944785e+002	7.061375e+001	771	37	8.697175e+000	0	0	0	0	0	0	674.092	1	1	51.0895	36.7965
DATA	44	1	44	0	0	A_42_P647599	NM_024129	7821.49	182.13	3.741640e+003	3.743812e+002	3683.5	35	8.178745e+000	0	0	0	0	0	0	3639.64	1	1	47.2035	35.5664
DATA	45	1	45	0	0	A_42_P798776	XM_002725203	7846.99	181.857	1.031426e+004	1.031504e+003	9916	35	8.821670e+000	0	0	0	0	0	0	10052.6	1	1	46.8651	36.5783
DATA	46	1	46	0	0	A_42_P781735	NM_053319	7872.5	182	1.064068e+005	1.064068e+004	103952	37	1.078775e+001	0	0	0	0	0	0	103892	1	1	54.1152	38.5476
DATA	47	1	47	0	0	A_42_P553611	TC630296	7897.56	182	8.243059e+003	8.244035e+002	7922	37	9.035751e+000	0	0	0	0	0	0	8060.8	1	1	49.8279	37.43
DATA	48	1	48	0	0	A_43_P12729	NM_032615	7922.94	182.024	1.068550e+004	1.068625e+003	10287	36	9.089019e+000	0	0	0	0	0	0	10463.8	1	1	50.7771	35.8767
DATA	49	1	49	0	0	A_42_P507072	FQ213070	7948.63	182	1.838679e+004	1.838723e+003	17812	35	8.731764e+000	0	0	0	0	0	0	18027.2	1	1	48.5334	35.6492
DATA	50	1	50	0	0	A_42_P645467	NM_001108804	7973.79	182.125	1.415748e+002	1.897795e+001	245	35	8.801085e+000	0	0	0	0	0	0	138.946	1	1	47.5395	35.0447
DATA	51	1	51	0	0	A_42_P738431	NM_019175	7999.38	182.237	4.638893e+003	4.640611e+002	4477.5	35	8.932761e+000	0	0	0	0	0	0	4556.58	1	1	49.1849	35.6126
DATA	52	1	52	0	0	A_42_P712297	NM_001135583	8024.69	182.053	8.960473e+003	8.961361e+002	8709	36	9.072719e+000	0	0	0	0	0	0	8807.01	1	1	49.1849	36.9594
DATA	53	1	53	0	0	A_42_P657538	NM_001008362	8050.16	182.118	7.843082e+003	7.844096e+002	7759.5	34	8.432407e+000	0	0	0	0	0	0	7712.29	1	1	46.5243	34.9326
DATA	54	1	54	0	0	A_42_P515405	NM_212505	8075.31	181.971	1.590137e+003	1.595130e+002	1644	35	8.585925e+000	0	0	0	0	0	0	1564.02	1	1	46.1809	36.1939
DATA	55	1	55	0	0	A_64_P089886	NM_053476	8100.94	181.969	9.604491e+003	9.605319e+002	9341	36	9.442461e+000	0	0	0	0	0	0	9447.54	1	1	46.8651	36.6926
DATA	56	1	56	0	0	A_42_P528580	NM_001107528	8126.09	182.104	8.618360e+003	8.619283e+002	8480	36	9.150002e+000	0	0	0	0	0	0	8476.73	1	1	46.8651	35.9393
DATA	57	1	57	0	0	A_43_P14285	NM_001034145	8151.87	182.3	1.758943e+004	1.758988e+003	17419.5	35	8.890037e+000	0	0	0	0	0	0	17295.5	1	1	47.2035	35.1379
DATA	58	1	58	0	0	A_42_P616287	NM_001134555	8177.06	182.481	9.855772e+002	9.936244e+001	1090	34	9.090540e+000	0	0	0	0	0	0	968.669	1	1	49.5074	35.305
DATA	59	1	59	0	0	A_42_P496411	NM_001109410	8202.43	182.392	9.228443e+003	9.229307e+002	9021	34	8.776518e+000	0	0	0	0	0	0	9064.21	1	1	49.1849	34.7984
DATA	60	1	60	0	0	A_44_P494310	NM_001009604	8228.01	182.603	1.149089e+004	1.149159e+003	10959.5	36	9.004757e+000	0	0	0	0	0	0	11277.1	1	1	48.5334	36.2838
DATA	61	1	61	0	0	A_42_P645142	NM_019375	8253.11	182.5	1.230087e+003	1.236576e+002	1311.5	35	9.120760e+000	0	0	0	1	0	0	1206	1	1	56.9804	36.0525
DATA	62	1	62	0	0	A_64_P042132	AABR03024196	8278.38	182.524	1.582022e+004	1.582073e+003	15741	34	8.946288e+000	0	0	0	0	0	0	15492.3	1	1	51.7088	35.1367
DATA	63	1	63	0	0	A_42_P508085	NM_001009620	8303.94	182.389	5.267048e+003	5.268575e+002	5283.5	33	8.335771e+000	0	0	0	0	0	0	5150.82	1	1	48.2044	33.7969
DATA	64	1	64	0	0	A_64_P051159	NM_001100684	8329.18	182.455	1.686176e+003	1.690954e+002	1727	33	8.342936e+000	0	0	0	0	1	0	1646.48	1	1	52.6241	33.1965
DATA	65	1	65	0	0	A_64_P124041	ENSRNOT00000019667	8354.58	182.427	3.581215e+002	3.800550e+001	453	33	8.971476e+000	0	0	0	0	0	0	349.099	1	1	57.5363	34.24
DATA	66	1	66	0	0	A_64_P131122	XR_086302	8380.11	182.5	1.350392e+002	1.857063e+001	233	34	8.892415e+000	0	0	0	0	0	0	131.392	1	1	56.9804	35.1705
DATA	67	1	67	0	0	A_64_P021601	NM_031737	8405.35	181.696	2.295306e+002	2.626833e+001	299	34	1.029945e+001	0	0	0	0	0	0	222.872	1	1	39.0882	35.8418
DATA	68	1	68	0	0	A_44_P776423	NM_001017386	8430.95	182.507	2.320964e+004	2.320999e+003	23733	35	9.670206e+000	0	0	0	0	0	0	22487.9	1	1	48.5334	36.1987
DATA	69	1	69	0	0	A_64_P120445	NM_080694	8456.33	182.5	3.452453e+002	5.085502e+001	190	34	1.033377e+001	0	1	0	0	0	0	333.726	1	1	57.5363	35.6386
DATA	70	1	70	0	0	A_42_P772878	NM_001011936	8481.89	182.648	6.676405e+003	6.677644e+002	6612.5	35	1.122000e+001	0	0	0	0	0	0	6437.51	1	1	47.8731	36.7423
DATA	71	1	71	0	0	A_42_P736315	NM_001108321	8507.36	182.938	2.163291e+003	2.167132e+002	2158	36	1.250469e+001	0	0	0	0	0	0	2080.38	1	1	45.1352	37.4793
DATA	73	1	73	0	0	A_64_P041004	NM_001108599	8557.94	182.506	2.373610e+004	2.373646e+003	22427	35	9.987950e+000	0	0	0	0	0	0	22695.6	1	1	50.4627	36.3721
DATA	74	1	74	0	0	A_42_P494276	NM_001109663	8583.24	182.471	2.844634e+003	2.847609e+002	2757	35	9.260479e+000	0	0	0	0	0	0	2711.58	1	1	47.2035	35.9627
DATA	75	1	75	66	1	DarkCorner	DarkCorner	8608.32	182.532	1.310475e+001	1.305374e+001	101	35	8.714641e+000	0	0	0	0	0	0	-6.55018	0	0	50.4627	35.3071
DATA	76	1	76	66	1	DarkCorner	DarkCorner	8634.05	182.595	1.314932e+001	1.309814e+001	98	35	8.499320e+000	0	0	0	0	0	0	-10.3565	0	0	50.1463	35.2109
DATA	77	1	77	66	1	DarkCorner	DarkCorner	8659.5	182.557	1.319537e+001	1.314402e+001	106.5	34	8.645848e+000	0	0	0	1	0	0	-2.22692	0	0	47.2035	34.7189
DATA	78	1	78	66	1	DarkCorner	DarkCorner	8684.88	182.722	1.324290e+001	1.319136e+001	100	35	8.547965e+000	0	0	0	0	0	0	-10.1274	0	0	47.8731	35.0424
DATA	79	1	79	66	1	DarkCorner	DarkCorner	8710.37	182.438	1.329293e+001	1.324119e+001	96	35	8.947903e+000	0	0	0	0	0	0	-13.1194	0	0	48.5334	35.5869
DATA	80	1	80	66	1	DarkCorner	DarkCorner	8735.5	182.648	1.334342e+001	1.329149e+001	97.5	35	9.547485e+000	0	0	0	0	0	0	-15.545	0	0	57.5363	35.8283
DATA	81	1	81	66	1	DarkCorner	DarkCorner	8760.93	182.747	1.339633e+001	1.334419e+001	98.5	35	8.980845e+000	0	0	0	0	0	0	-14.4917	0	0	48.8603	35.2291
DATA	82	1	82	66	1	DarkCorner	DarkCorner	8786.28	182.84	1.345069e+001	1.339834e+001	100	34	8.414864e+000	0	0	0	0	0	0	-12.1298	0	0	49.1849	34.3906
DATA	83	1	83	66	1	DarkCorner	DarkCorner	8811.5	183.092	1.350615e+001	1.345358e+001	98.5	34	7.936793e+000	0	0	0	0	0	0	-13.4287	0	0	49.1849	34.036
DATA	84	1	84	260	1	GE_BrightCorner	GE_BrightCorner	8837.12	183	5.055440e+004	5.055458e+003	44863	35	9.409081e+000	0	0	0	0	0	0	46408.8	1	1	49.8279	36.3112
DATA	85	1	85	260	1	GE_BrightCorner	GE_BrightCorner	8862.5	183	4.746086e+004	4.746105e+003	42759	35	9.632341e+000	0	0	0	0	0	0	43379.8	1	1	54.1152	35.9943
DATA	86	2	1	260	1	GE_BrightCorner	GE_BrightCorner	6742.42	188.427	5.408093e+004	5.408116e+003	40699	38	7.854991e+000	0	0	0	0	0	0	42013.3	1	1	57.5363	38.2464
DATA	87	2	2	66	1	DarkCorner	DarkCorner	6767.55	188.571	1.591160e+001	1.584968e+001	94	39	8.085559e+000	0	0	0	0	0	0	-14.9134	0	0	49.8279	39.075
DATA	88	2	3	66	1	DarkCorner	DarkCorner	6793.11	188.5	1.579431e+001	1.573284e+001	95	37	9.901747e+000	0	0	0	0	0	0	-13.6476	0	0	56.9804	38.375
DATA	89	2	4	66	1	DarkCorner	DarkCorner	6818.5	188.5	1.567899e+001	1.561797e+001	94	35	7.064772e+000	0	0	0	0	0	0	-14.4847	0	0	57.5363	35.1651
DATA	90	2	5	66	1	DarkCorner	DarkCorner	6843.71	188.74	1.556531e+001	1.550473e+001	89	35	9.180140e+000	0	0	0	0	0	0	-16.9374	0	0	48.2044	35.7921
DATA	91	2	6	66	1	DarkCorner	DarkCorner	6869.75	188.96	1.544968e+001	1.538955e+001	93.5	36	8.904979e+000	0	0	0	0	0	0	-16.0884	0	0	49.1849	36.8922
DATA	92	2	7	66	1	DarkCorner	DarkCorner	6894.59	188.716	1.534215e+001	1.528243e+001	96.5	36	9.337307e+000	0	0	0	0	0	0	-12.7827	0	0	48.5334	36.875
DATA	93	2	8	66	1	DarkCorner	DarkCorner	6920.11	188.5	1.523333e+001	1.517404e+001	92	36	8.160136e+000	0	0	0	0	0	0	-14.9877	0	0	56.9804	36.0788
DATA	94	2	9	66	1	DarkCorner	DarkCorner	6945.39	189.027	1.512546e+001	1.506659e+001	91	37	8.856891e+000	0	0	0	0	0	0	-15.1968	0	0	49.1849	37.6891
DATA	95	2	10	66	1	DarkCorner	DarkCorner	6970.67	188.5	1.502198e+001	1.496351e+001	93	35	8.714842e+000	0	0	0	0	0	0	-12.634	0	0	65	36.7961
DATA	96	2	11	0	0	A_44_P212746	ENSRNOT00000049707	6996.42	188.573	2.620947e+001	1.508837e+001	129	36	8.391151e+000	0	0	0	0	0	0	21.8787	1	0	57.5363	36.4308
DATA	97	2	12	0	0	A_64_P103615	NM_001107179	7021.58	188.573	4.130185e+002	4.385966e+001	453	36	8.794958e+000	0	0	0	0	0	0	347.109	1	1	57.5363	36.5485
DATA	98	2	13	0	0	A_44_P550697	NM_001106400	7046.89	188.789	1.190411e+003	1.199404e+002	1109	36	9.829087e+000	0	0	0	0	0	0	1007.2	1	1	46.8651	36.89
DATA	99	2	14	0	0	A_64_P045429	A_64_P045429	7072.15	188.915	1.546472e+002	2.124256e+001	240.5	38	9.354951e+000	0	0	0	0	0	0	131.715	1	1	46.8651	39.1005
DATA	100	2	15	0	0	A_64_P075175	ENSRNOT00000044322	7097.56	188.957	2.679790e+002	3.045425e+001	339.5	37.5	9.989363e+000	0	0	0	0	0	0	229.738	1	1	47.8731	38.9466
DATA	101	2	16	0	0	A_44_P472801	NM_173121	7123.38	189.288	3.710219e+003	3.713002e+002	3135	41	9.220270e+000	0	0	0	0	0	0	3201.75	1	1	45.835	41.0944
DATA	102	2	17	0	0	A_42_P491486	NM_022533	7148.07	189.011	1.281637e+004	1.281716e+003	10827	42	1.137934e+001	0	0	0	0	0	0	11127.6	1	1	52.3208	43.5
DATA	103	2	18	0	0	A_43_P12736	NM_033299	7174	188.545	4.451660e+002	4.672555e+001	507	39	9.739367e+000	0	0	0	0	0	0	388.94	1	1	55.8519	40.0946
DATA	104	2	19	0	0	A_64_P158790	A_64_P158790	7199.42	188.573	3.909001e+004	3.909026e+003	34260	38	9.094249e+000	0	0	0	0	0	0	34361.3	1	1	57.5363	38.0977
DATA	105	2	20	0	0	A_44_P229481	NM_001191077	7224.53	189.052	6.259272e+002	6.414519e+001	657.5	39	9.255617e+000	0	0	0	0	0	0	553.49	1	1	49.5074	39.652
DATA	106	2	21	0	0	A_64_P133836	ENSRNOT00000039319	7250.42	188.573	4.427210e+001	1.463067e+001	144	38	1.008377e+001	0	0	0	0	0	0	39.3795	1	0	57.5363	39.0047
DATA	107	2	22	0	0	A_43_P13137	NM_130818	7275.5	188.648	3.675092e+001	1.434522e+001	140.5	39	1.041694e+001	0	0	0	0	0	0	32.8741	1	0	57.5363	38.8191
DATA	108	2	23	0	0	A_42_P586141	NM_017035	7300.94	189.373	2.431281e+003	2.435188e+002	2252	37	9.868799e+000	0	0	0	0	0	0	2187.12	1	1	45.835	37.9592
DATA	109	2	24	0	0	A_44_P142850	NM_001106975	7326.5	188.648	9.908674e+001	1.691954e+001	196.5	38	9.260597e+000	0	0	0	0	0	0	89.616	1	1	57.5363	38.1302
DATA	110	2	25	0	0	A_44_P1042504	NM_001044232	7351.53	189.071	2.079835e+002	2.487369e+001	300	35	9.335441e+000	0	0	0	0	0	0	189.092	1	1	47.8731	36.8867
DATA	111	2	26	0	0	A_42_P476474	NM_001033926	7377.22	189.084	1.040481e+004	1.040570e+003	9267	37	8.820726e+000	0	0	0	1	0	0	9508.89	1	1	49.8279	36.7635
DATA	112	2	27	0	0	A_44_P480882	ENSRNOT00000035496	7402.61	189.203	2.861075e+002	3.163793e+001	361	34	9.169239e+000	0	0	0	0	0	0	262.777	1	1	47.2035	35.7427
DATA	113	2	28	0	0	A_44_P1042696	NM_001106377	7427.8	189.216	1.226422e+004	1.226496e+003	11063	37	9.784270e+000	0	0	0	0	0	0	11318.1	1	1	47.8731	36.9104
DATA	114	2	29	0	0	A_64_P132576	NM_001012357	7453.29	189.088	2.018549e+003	2.022977e+002	1933.5	31.5	8.512738e+000	0	0	0	0	1	0	1871.54	1	1	45.835	32.225
DATA	115	2	30	0	0	A_42_P652357	NM_021868	7478.7	188.9	2.709741e+004	2.709774e+003	24292	34	8.649498e+000	0	0	0	0	0	0	25236.9	1	1	47.2035	35.9091
DATA	116	2	31	0	0	A_64_P134935	NM_001107976	7504	189	2.590554e+001	1.351128e+001	130	36	8.382072e+000	0	0	0	0	0	0	24.2315	1	0	54.9904	36.5441
DATA	117	2	32	0	0	A_64_P034019	NM_001107145	7529.43	189.097	9.977223e+001	1.655062e+001	202	36.5	8.540158e+000	0	0	0	0	0	0	93.7164	1	1	48.2044	36.6618
DATA	118	2	33	0	0	A_64_P140634	A_64_P140634	7554.57	189.177	1.351462e+004	1.351526e+003	12645	37	9.274944e+000	0	0	0	0	0	0	12744.8	1	1	49.5074	37.1724
DATA	120	2	35	0	0	A_42_P746029	NM_144748	7605.31	189.595	5.308152e+001	1.409230e+001	158.5	37	9.346832e+000	0	0	0	0	0	0	50.4358	1	0	48.5334	37.7451
DATA	121	2	36	0	0	A_64_P009032	NM_001105801	7630.93	189.732	3.049433e+004	3.049460e+003	28768.5	39	9.664761e+000	0	0	0	0	0	0	29076.8	1	1	47.5395	39.4216
DATA	122	2	37	0	0	A_42_P764792	NM_001014036	7656.63	189.206	1.543376e+003	1.548812e+002	1526	37	1.059921e+001	0	0	0	0	0	0	1476.51	1	1	46.8651	37.5646
DATA	123	2	38	0	0	A_64_P029278	NM_001108687	7682	189.271	1.652591e+003	1.657638e+002	1681	38	8.431845e+000	0	0	0	0	0	0	1585.95	1	1	46.8651	37.7333
DATA	124	2	39	0	0	A_43_P12266	NM_022622	7707.42	189.427	2.189180e+002	2.540310e+001	317.5	37	9.227183e+000	0	0	0	0	0	0	210.713	1	1	57.5363	37.6453
DATA	125	2	40	0	0	A_44_P204710	ENSRNOT00000049315	7732.8	189.042	3.069058e+001	1.321278e+001	135.5	38	1.049820e+001	0	0	0	0	0	0	29.6215	1	0	46.8651	39.5215
DATA	126	2	41	0	0	A_64_P163837	NM_001013149	7758	189.455	5.717576e+002	5.859497e+001	651.5	37	9.279668e+000	0	0	0	0	0	0	553.273	1	1	55.8519	37.8585
DATA	127	2	42	0	0	A_64_P016202	XM_001080153	7783.42	189.427	1.283729e+001	1.280920e+001	112	38	9.434222e+000	0	0	0	0	0	0	7.25716	0	0	57.5363	38.7488
DATA	128	2	43	0	0	A_64_P137168	NM_053912	7809.06	189.538	1.528311e+004	1.528364e+003	14828	37	8.691666e+000	0	0	0	0	0	0	14858	1	1	44.7812	37.5171
DATA	129	2	44	0	0	A_42_P830598	XM_001063895	7834.39	189.638	1.576998e+003	1.582130e+002	1588.5	37	9.311708e+000	0	0	0	0	0	0	1536.25	1	1	47.5395	37.975
DATA	130	2	45	0	0	A_42_P525886	NM_001105716	7859.5	189.5	6.130478e+002	6.260838e+001	700	38	1.013665e+001	0	0	0	0	0	0	598.294	1	1	57.5363	39.2538
DATA	131	2	46	0	0	A_42_P836392	NM_134383	7885.01	189.169	1.461511e+004	1.461566e+003	14233.5	40	1.143960e+001	0	0	0	0	0	0	14287	1	1	46.8651	40.507
DATA	132	2	47	0	0	A_44_P146783	NM_001001366	7910.41	189.471	7.396644e+001	1.467076e+001	178	36	8.504962e+000	0	0	0	0	0	0	72.4137	1	1	46.8651	36.6915
DATA	133	2	48	0	0	A_44_P294675	NM_053687	7935.73	189.152	7.869055e+002	7.970142e+001	867.5	36	9.041268e+000	0	0	0	0	0	0	771.364	1	1	45.835	36.3934
DATA	134	2	49	0	0	A_64_P047137	NM_001001283	7961.11	189.5	3.003206e+001	1.299134e+001	135.5	36	8.782247e+000	0	0	0	0	0	0	29.4719	1	0	56.9804	36.4853
DATA	135	2	50	0	0	A_44_P170396	NM_017267	7986.66	189.608	8.066026e+001	1.498402e+001	187	35	9.662215e+000	0	0	0	0	0	0	79.2292	1	1	48.5334	35.4375
DATA	136	2	51	0	0	A_64_P077603	ENSRNOT00000037503	8011.89	189.5	4.628089e+002	4.797032e+001	560.5	37	8.998350e+000	0	0	0	0	0	0	454.925	1	1	56.9804	38
DATA	137	2	52	0	0	A_42_P648800	AA998304	8037.36	189.87	5.844069e+002	5.978600e+001	657	37	9.985567e+000	0	0	0	0	0	0	574.775	1	1	46.8651	38.4596
DATA	138	2	53	0	0	A_64_P143186	A_64_P143186	8062.58	189.573	1.271453e+002	1.790538e+001	227.5	34	8.153939e+000	0	0	0	0	0	0	125.092	1	1	57.5363	34.5672
DATA	139	2	54	0	0	A_42_P622681	NM_001030020	8088.32	189.632	1.130530e+004	1.130600e+003	10797	37	9.200012e+000	0	0	0	0	0	0	11124.7	1	1	46.5243	38.0439
DATA	140	2	55	0	0	A_42_P506076	NM_019253	8113.5	189.5	4.309041e+004	4.309059e+003	42099	37	8.745748e+000	0	0	0	0	0	0	42401.4	1	1	49.1849	37.6816
DATA	141	2	56	0	0	A_64_P158975	NM_001109536	8138.67	189.5	1.787589e+002	2.187466e+001	282	37	9.367857e+000	0	0	0	0	0	0	175.867	1	1	57.5363	37.1818
DATA	142	2	57	0	0	A_42_P655425	NM_001106406	8164.36	189.87	1.655729e+003	1.660526e+002	1740.5	35	9.282879e+000	0	0	0	0	0	0	1628.36	1	1	46.8651	36.1144
DATA	143	2	58	0	0	A_44_P408520	NM_031569	8189.85	189.864	6.914132e+002	7.028349e+001	780.5	36	9.390206e+000	0	0	0	0	0	0	679.603	1	1	46.1809	36.3744
DATA	144	2	59	0	0	A_64_P031259	NM_001002022	8215	189.545	5.859689e+002	5.994230e+001	675	36	8.954615e+000	0	0	0	0	0	0	575.531	1	1	55.8519	35.5023
DATA	145	2	60	0	0	A_43_P10227	NM_024397	8240.52	189.918	1.117668e+004	1.117740e+003	10932	37	8.904192e+000	0	0	0	0	0	0	10967.8	1	1	43.7019	37.2239
DATA	146	2	61	0	0	A_42_P542744	NM_001107544	8265.92	189.985	5.753006e+003	5.754397e+002	5684	37	9.103833e+000	0	0	0	0	0	0	5639.34	1	1	46.8651	37.1436
DATA	147	2	62	0	0	A_64_P052387	A_64_P052387	8291.42	189.573	8.898447e+001	1.548263e+001	189.5	35	9.347231e+000	0	0	0	0	0	0	87.1141	1	1	57.5363	36.2238
DATA	149	2	64	0	0	A_64_P064823	ENSRNOT00000050238	8341.82	189.955	5.123093e+002	5.278353e+001	609	34	8.524612e+000	0	0	0	0	0	0	500.044	1	1	45.835	33.7861
DATA	150	2	65	0	0	A_42_P730292	NM_001004244	8367.49	189.833	7.184202e+003	7.185330e+002	7357.5	35	9.808007e+000	0	0	0	0	0	0	6999.64	1	1	47.8731	35.8877
DATA	151	2	66	0	0	A_64_P052878	FM104687	8392.86	190.231	1.438443e+003	1.444087e+002	1488	36	1.045169e+001	0	0	0	0	0	0	1398.82	1	1	45.835	36.8486
DATA	152	2	67	0	0	A_64_P157171	XM_001063008	8418	190.085	1.960390e+003	1.964553e+002	2003.5	36	1.161458e+001	0	0	0	0	0	0	1902.42	1	1	44.0646	37.7857
DATA	153	2	68	0	0	A_44_P693350	ENSRNOT00000030985	8443.5	189.648	1.286098e+001	1.282125e+001	113	36	1.028987e+001	0	0	0	0	0	0	4.9812	0	0	65	37.3189
DATA	154	2	69	0	0	A_64_P090168	NM_001000720	8468.91	189.935	6.476183e+001	1.438221e+001	168	37	1.040635e+001	0	0	0	0	0	0	62.5535	1	1	65	37.7687
DATA	155	2	70	0	0	A_42_P726392	NM_001106353	8494.49	189.87	2.138250e+003	2.142123e+002	2110	38	3.192333e+001	0	0	1	0	0	0	2060	1	1	47.2035	46.3
DATA	156	2	71	0	0	A_64_P015727	FQ218047	8519.85	189.864	5.315197e+003	5.316764e+002	5183.5	40	3.876549e+001	0	0	1	0	0	0	5106.85	1	1	46.1809	52.9885
DATA	157	2	72	0	0	A_44_P897023	NM_001008364	8545.3	189.9	1.403151e+003	1.409111e+002	1440	37	1.934014e+001	0	0	0	0	0	0	1344.3	1	1	47.2035	42.0424
DATA	158	2	73	0	0	A_44_P104776	NM_001001425	8570.38	190	1.228952e+002	1.787859e+001	225	37	8.681223e+000	0	0	0	0	0	0	117.393	1	1	48.5334	37.4175
DATA	159	2	74	0	0	A_64_P142521	A_64_P142521	8595.91	190.065	3.783008e+001	1.356422e+001	142.5	36	9.072236e+000	0	0	0	0	0	0	36.0228	1	0	54.4085	35.7806
DATA	160	2	75	66	1	DarkCorner	DarkCorner	8621.29	189.987	1.311982e+001	1.306875e+001	93	36	8.529283e+000	0	0	0	0	0	0	-16.6363	0	0	49.1849	36.5502
DATA	161	2	76	66	1	DarkCorner	DarkCorner	8646.39	190.186	1.316380e+001	1.311257e+001	99	35	8.775392e+000	0	0	0	0	0	0	-12.7148	0	0	47.2035	35.0498
DATA	162	2	77	66	1	DarkCorner	DarkCorner	8672.23	190.101	1.321125e+001	1.315983e+001	93	36	7.485168e+000	0	0	0	0	0	0	-14.3059	0	0	46.5243	35.68
DATA	163	2	78	66	1	DarkCorner	DarkCorner	8697.5	190.352	1.325907e+001	1.320746e+001	93	35	8.552882e+000	0	0	0	0	0	0	-14.3633	0	0	57.5363	34.6893
DATA	164	2	79	66	1	DarkCorner	DarkCorner	8722.63	190.404	1.330854e+001	1.325674e+001	92	36	9.114973e+000	0	0	0	0	0	0	-19.5683	0	0	65	36.2784
DATA	165	2	80	66	1	DarkCorner	DarkCorner	8748.42	190.427	1.336106e+001	1.330905e+001	91	35	9.960884e+000	0	0	0	0	0	0	-18.1666	0	0	57.5363	36.5381
DATA	166	2	81	66	1	DarkCorner	DarkCorner	8773.54	190.184	1.341418e+001	1.336197e+001	93.5	34	8.151087e+000	0	0	0	0	0	0	-18.6902	0	0	49.8279	34.2439
DATA	167	2	82	66	1	DarkCorner	DarkCorner	8799	190.266	1.346924e+001	1.341681e+001	91	35	8.408006e+000	0	0	0	0	0	0	-18.2865	0	0	49.8279	35.0049
DATA	168	2	83	66	1	DarkCorner	DarkCorner	8824.5	190.352	1.352592e+001	1.347328e+001	96.5	35	8.200352e+000	0	0	0	0	0	0	-17.7774	0	0	65	34.9455
DATA	169	2	84	66	1	DarkCorner	DarkCorner	8849.58	190.427	1.358316e+001	1.353030e+001	98	35	8.890445e+000	0	0	0	0	0	0	-15.34	0	0	57.5363	36.1165
DATA	170	2	85	260	1	GE_BrightCorner	GE_BrightCorner	8875.5	190	5.073434e+004	5.073452e+003	45847.5	36	9.609111e+000	0	0	0	0	0	0	46300.9	1	1	48.5334	36.5335
DATA	171	3	1	66	1	DarkCorner	DarkCorner	6729.58	195.573	1.606642e+001	1.600389e+001	103	39	8.774357e+000	0	0	0	0	0	0	-7.45573	0	0	57.5363	39.4701
DATA	172	3	2	66	1	DarkCorner	DarkCorner	6755	195.545	1.594839e+001	1.588632e+001	95.5	39	9.638043e+000	0	0	0	0	0	0	-14.3286	0	0	55.8519	40.0678
DATA	173	3	3	66	1	DarkCorner	DarkCorner	6780.42	195.573	1.583146e+001	1.576984e+001	97	42	9.204815e+000	0	0	0	0	0	0	-13.7806	0	0	57.5363	42.2909
DATA	174	3	4	66	1	DarkCorner	DarkCorner	6805.58	195.573	1.571711e+001	1.565594e+001	96	37	1.044646e+001	0	0	0	0	0	0	-13.7422	0	0	57.5363	38.0833
DATA	175	3	5	66	1	DarkCorner	DarkCorner	6831.3	196.2	1.559996e+001	1.553924e+001	90	37	7.079159e+000	0	0	0	0	0	0	-20.6839	0	0	47.2035	38.413
DATA	176	3	6	66	1	DarkCorner	DarkCorner	6856.31	196.127	1.548948e+001	1.542920e+001	92	38	1.013652e+001	0	0	0	0	0	0	-16.5151	0	0	47.5395	38.0741
DATA	177	3	7	66	1	DarkCorner	DarkCorner	6881.91	195.614	1.537913e+001	1.531927e+001	96	37	9.334728e+000	0	0	0	0	0	0	-14.4323	0	0	57.259	38.4528
DATA	178	3	8	66	1	DarkCorner	DarkCorner	6907.4	195.853	1.526898e+001	1.520955e+001	90	38.5	9.223506e+000	0	0	0	0	0	0	-18.5095	0	0	48.8603	38.22
DATA	179	3	9	66	1	DarkCorner	DarkCorner	6932.58	195.573	1.516318e+001	1.510416e+001	90	39	7.960044e+000	0	0	0	0	0	0	-19.2816	0	0	57.5363	39.0656
DATA	180	3	10	66	1	DarkCorner	DarkCorner	6958.37	195.596	1.505590e+001	1.499730e+001	93	41	9.771679e+000	0	0	0	0	0	0	-16.4635	0	0	57.8122	41.4286
DATA	181	3	11	0	0	A_64_P269465	ENSRNOT00000055742	6983.29	196.029	3.097467e+001	1.521357e+001	134	41	1.068741e+001	0	0	0	0	0	0	25.7941	1	0	46.1809	40.94
DATA	182	3	12	0	0	A_64_P140776	NM_001114502	7008.78	196.11	9.165208e+003	9.166402e+002	7616	40	8.796356e+000	0	0	0	0	0	0	7684.91	1	1	47.8731	40.3333
DATA	183	3	13	0	0	A_42_P662683	NM_001108855	7034.2	196	3.192638e+004	3.192672e+003	26972	42	9.830997e+000	0	0	0	0	0	0	26950.7	1	1	49.1849	42.3158
DATA	184	3	14	0	0	A_44_P308687	NM_181389	7059.63	195.958	8.735871e+002	8.856972e+001	848	43	1.222594e+001	0	0	0	0	0	0	742.363	1	1	48.2044	45.2549
DATA	185	3	15	0	0	A_42_P705255	NM_078622	7085.15	196.095	3.314370e+002	3.617679e+001	396.5	45	1.125695e+001	0	0	0	0	0	0	283.517	1	1	47.8731	45.0172
DATA	186	3	16	0	0	A_44_P142472	NM_001106072	7110.31	196	1.395098e+004	1.395173e+003	11996	43.5	1.031724e+001	0	0	0	0	0	0	12010.3	1	1	50.4627	44.25
DATA	187	3	17	0	0	A_64_P015946	NM_001009720	7136.24	195.933	2.860234e+003	2.863814e+002	2523	44	8.774639e+000	0	0	0	0	0	0	2478.32	1	1	48.8603	43.84
DATA	188	3	18	0	0	A_64_P118698	ENSRNOT00000050943	7161.01	196.324	2.061369e+002	2.504698e+001	289	47	9.196547e+000	0	0	0	0	0	0	179.71	1	1	46.1809	46.9412
DATA	189	3	19	0	0	A_42_P705302	NM_001107361	7186.63	196.477	1.696237e+004	1.696295e+003	14633	43	8.999575e+000	0	0	0	0	0	0	14879.5	1	1	52.9257	43.6122
DATA	190	3	20	0	0	A_64_P097547	NM_001100528	7212.09	196.386	9.277654e+001	1.684136e+001	185.5	39	8.982252e+000	0	0	0	0	0	0	81.8736	1	1	57.259	40.5957
DATA	191	3	21	0	0	A_42_P815485	NM_001013908	7237.54	196.176	1.450307e+004	1.450374e+003	12857	44	8.096816e+000	0	0	0	0	0	0	12873.8	1	1	48.8603	42.9608
DATA	192	3	22	0	0	A_42_P526728	ENSRNOT00000060758	7262.9	196.125	6.048681e+003	6.050277e+002	5409	47	1.056127e+001	0	0	0	0	0	0	5399.99	1	1	46.8651	46.4651
DATA	193	3	23	0	0	A_42_P692317	NM_001107565	7288.44	196.267	1.950126e+003	1.955014e+002	1805.5	43.5	9.019679e+000	0	0	0	0	0	0	1750.84	1	1	49.1849	43.5833
DATA	194	3	24	0	0	A_44_P383949	NM_175593	7313.58	196.427	3.959595e+001	1.429993e+001	142	40.5	1.502626e+001	0	0	0	0	0	0	35.743	1	0	57.5363	43.5455
DATA	195	3	25	0	0	A_42_P589570	NM_001014105	7339.29	196.526	1.385606e+003	1.392330e+002	1320	39	8.287407e+000	0	0	0	1	0	0	1257.54	1	1	49.1849	40.1633
DATA	196	3	26	0	0	A_64_P012384	NM_001039338	7364.25	196.36	4.779493e+002	4.969160e+001	547	44.5	9.594982e+000	0	0	0	0	0	0	435.979	1	1	49.1849	44.24
DATA	197	3	27	0	0	A_64_P088612	NM_053871	7389.88	196.603	1.041048e+004	1.041136e+003	9450.5	38.5	9.029478e+000	0	0	0	0	0	0	9544.81	1	1	48.5334	38.4792
DATA	198	3	28	0	0	A_42_P668072	NM_013130	7415.47	196.442	9.141517e+002	9.240117e+001	935	41.5	7.211304e+000	0	0	0	0	0	0	842.248	1	1	49.8279	41.7381
DATA	199	3	29	0	0	A_44_P624451	NM_001134605	7440.6	196.306	1.777613e+002	2.226103e+001	270	35	7.312127e+000	0	0	0	0	0	0	164.544	1	1	48.5334	35.5577
DATA	200	3	30	0	0	A_64_P118502	A_64_P118502	7466	196.455	5.957404e+002	6.104910e+001	665	44	1.060614e+001	0	0	0	0	0	0	553.972	1	1	55.8519	43.5686
DATA	201	3	31	0	0	A_43_P15761	NM_031608	7491.6	196.507	2.230282e+002	2.595709e+001	321	43	1.047344e+001	0	0	0	0	0	0	208.314	1	1	48.5334	43.1224
DATA	202	3	32	0	0	A_42_P667696	NM_001191800	7516.82	196.639	9.645235e+003	9.646141e+002	8799	40	1.009942e+001	0	0	0	1	0	0	9046.94	1	1	47.8731	39.96
DATA	203	3	33	0	0	A_44_P899121	NM_001079941	7542.18	196.521	5.492918e+003	5.494496e+002	5240.5	41	9.900826e+000	0	0	0	0	0	0	5173.11	1	1	47.8731	41.8776
DATA	204	3	34	0	0	A_42_P642757	NM_031235	7567.63	196.63	6.812446e+003	6.813709e+002	6461	42	8.886782e+000	0	0	0	0	0	0	6441	1	1	48.2044	42.4902
DATA	205	3	35	0	0	A_64_P066694	NM_001033898	7592.67	197.029	3.230007e+002	3.484439e+001	414	41	8.094580e+000	0	0	0	0	0	0	306.523	1	1	46.5243	41.0222
DATA	206	3	36	0	0	A_42_P699201	TC594545	7618.42	196.427	5.134722e+001	1.399965e+001	154.5	42	1.064694e+001	0	0	0	0	0	0	48.9017	1	0	65	41.3279
DATA	207	3	37	0	0	A_42_P591944	NM_172093	7643.67	196.5	2.099129e+002	2.468037e+001	309	40	9.574588e+000	0	0	0	0	0	0	200.59	1	1	57.5363	41.5
DATA	208	3	38	0	0	A_44_P115293	NM_001108294	7669.11	196.5	6.454828e+002	6.583227e+001	722	41	8.943155e+000	0	0	0	0	0	0	618.798	1	1	56.9804	41.5192
DATA	209	3	39	1028	1	(+)E1A_r60_a107	E1A_r60_a107	7694.46	196.583	2.606049e+001	1.316011e+001	134	40	7.857205e+000	0	0	0	0	0	0	25.0589	1	0	48.2044	39.5962
DATA	210	3	40	0	0	A_44_P194531	NM_001007742	7719.96	196.653	1.010437e+003	1.018591e+002	1057	41	8.699743e+000	0	0	0	0	0	0	974.387	1	1	48.5334	41.1111
DATA	211	3	41	0	0	A_43_P20016	NM_001107377	7745.2	196.535	3.688366e+002	3.905098e+001	461	40	1.168732e+001	0	0	0	0	0	0	356.619	1	1	47.5395	42.898
DATA	212	3	42	0	0	A_64_P105550	A_64_P105550	7770.73	196.985	1.803021e+002	2.210959e+001	284	41	1.027827e+001	0	0	0	0	0	0	174.77	1	1	45.4864	41.9
DATA	213	3	43	0	0	A_42_P791872	NM_001135174	7796.33	196.753	2.057748e+004	2.057788e+003	19322	39	9.284945e+000	0	0	0	0	0	0	19992.2	1	1	48.2044	39.902
DATA	214	3	44	0	0	A_42_P499273	NM_001012148	7821.63	197	7.330519e+003	7.331626e+002	7051	40	9.089524e+000	0	0	0	0	0	0	7137.14	1	1	48.5334	40.4091
DATA	215	3	45	0	0	A_64_P021960	NM_001109493	7846.82	196.639	4.906185e+002	5.068287e+001	587.5	38	1.045698e+001	0	0	0	0	0	0	478.582	1	1	47.8731	40.1887
DATA	216	3	46	0	0	A_64_P083725	A_64_P083725	7872.42	196.573	1.218816e+005	1.218817e+004	119576	50.5	1.127792e+001	0	0	0	0	0	0	119100	1	1	57.5363	50.8462
DATA	217	3	47	0	0	A_42_P524536	NM_012698	7897.83	196.7	9.228086e+002	9.314706e+001	981.5	39	1.207414e+001	0	0	0	0	0	0	903.167	1	1	47.2035	42.6296
DATA	218	3	48	0	0	A_64_P151675	NM_175755	7923	196.545	1.617411e+002	2.053738e+001	267	40.5	1.066916e+001	0	0	0	0	0	0	158.513	1	1	55.8519	41.4074
DATA	219	3	49	0	0	A_64_P146914	A_64_P146914	7948.65	196.795	9.162356e+003	9.163228e+002	8951	38	7.701155e+000	0	0	0	0	0	0	8990.4	1	1	51.0895	39.0952
DATA	220	3	50	0	0	A_64_P115065	NM_001109631	7973.58	196.573	2.167732e+001	1.281336e+001	124	39	1.011929e+001	0	0	0	0	0	0	21.2912	1	0	57.5363	38.4259
DATA	221	3	51	0	0	A_42_P468771	NM_001107362	7999.36	197.129	5.817845e+003	5.819214e+002	5657	39	9.077963e+000	0	0	0	0	0	0	5719.13	1	1	46.8651	38.9286
DATA	222	3	52	0	0	A_44_P226461	NM_053798	8024.7	197.254	5.284741e+003	5.286245e+002	5210	39	8.164857e+000	0	0	0	0	0	0	5198.38	1	1	45.835	39.625
DATA	223	3	53	0	0	A_64_P009440	NM_001109313	8049.79	196.75	8.291564e+001	1.508723e+001	189	39	8.700130e+000	0	0	0	0	0	0	81.5945	1	1	47.5395	39.5818
DATA	224	3	54	0	0	A_44_P282433	NM_033230	8075.7	196.9	1.861765e+003	1.866025e+002	1942	37	9.404920e+000	0	0	0	0	0	0	1832.61	1	1	47.2035	38.7455
DATA	225	3	55	0	0	A_42_P461003	NM_001044283	8101	197	3.187831e+004	3.187856e+003	31413	41	7.727375e+000	0	0	0	0	0	0	31381.6	1	1	46.8651	42.2292
DATA	226	3	56	0	1	ETG10_236652	ETG10_236652	8126.08	197	2.855357e+001	1.292077e+001	134	40	6.328708e+000	0	0	0	0	0	0	28.1058	1	0	46.8651	40.451
DATA	227	3	57	0	0	A_42_P529780	NM_138855	8151.91	197.104	1.036265e+003	1.043903e+002	1105	42	8.503102e+000	0	0	0	0	0	0	1019.72	1	1	46.8651	41.371
DATA	228	3	58	0	0	A_42_P492976	NM_001126099	8177.54	197.054	1.802854e+003	1.807259e+002	1822	41	9.831970e+000	0	0	0	0	0	0	1773.23	1	1	48.5334	40.7925
DATA	229	3	59	0	0	A_42_P533865	NM_001127650	8202.5	197	7.669387e+001	1.476676e+001	182.5	40	8.672350e+000	0	0	0	0	0	0	75.3858	1	1	54.1152	40.0769
DATA	230	3	60	0	0	A_64_P026399	NM_001007626	8227.87	197	2.204242e+003	2.207857e+002	2249	38	9.043998e+000	0	0	0	0	0	0	2164.87	1	1	48.5334	40.2264
DATA	231	3	61	0	0	A_64_P152543	XM_221353	8253.27	197.09	3.721381e+004	3.721403e+003	36588.5	40	8.413078e+000	0	0	0	0	0	0	36512.8	1	1	49.1849	39.7778
DATA	232	3	62	0	0	A_44_P203195	NM_053585	8278.72	197.098	6.374178e+003	6.375434e+002	6072	40	1.077318e+001	0	0	0	0	0	0	6246.77	1	1	49.8279	41.7037
DATA	233	3	63	0	0	A_42_P490612	NM_001108262	8304.22	197.134	1.457644e+004	1.457699e+003	13976.5	39	1.106250e+001	0	0	0	0	0	0	14265.9	1	1	46.1809	39.9245
DATA	234	3	64	0	0	A_44_P457548	NM_001103351	8329.42	197.427	7.523381e+002	7.629697e+001	844	36	8.048362e+000	0	0	0	0	0	0	735.216	1	1	57.5363	36.5319
DATA	235	3	65	0	0	A_42_P755665	NM_001013154	8354.7	196.766	4.495381e+003	4.497178e+002	4536	36.5	8.826161e+000	0	0	0	1	0	0	4385.58	1	1	45.1352	37.2037
DATA	236	3	66	0	0	A_42_P781999	NM_001106378	8380.25	197.029	2.871981e+004	2.872009e+003	27245	48	1.056036e+002	0	0	1	0	1	0	27966.8	1	1	46.5243	88.7021
DATA	237	3	67	0	0	A_44_P100289	ENSRNOT00000049514	8405	197.582	7.672525e+001	1.489095e+001	181.5	48	5.664991e+001	0	0	1	0	1	0	74.5703	1	1	49.8279	66.0208
DATA	238	3	68	0	0	A_42_P629599	ENSRNOT00000023101	8430.91	197.104	4.979422e+002	5.141076e+001	593	47	1.210171e+002	0	0	1	0	1	0	482.876	1	1	46.8651	96.1765
DATA	239	3	69	0	0	A_44_P192083	NM_001047088	8456.24	196.897	1.185897e+002	1.746426e+001	223	89	7.992694e+002	0	0	1	0	1	0	114.734	1	1	46.1809	585.875
DATA	240	3	70	0	0	A_42_P498066	NM_031136	8481.48	197.234	9.811221e+004	9.811229e+003	94934	45	2.361553e+002	0	0	1	0	1	0	94691.5	1	1	49.8279	158.957
DATA	241	3	71	0	0	A_42_P519910	NM_001106292	8507.04	197.145	4.882580e+004	4.882597e+003	46808	44	1.110293e+001	0	0	0	0	0	0	46998.9	1	1	46.8651	44.48
DATA	242	3	72	0	0	A_42_P657538	NM_001008362	8532.78	197.149	7.420753e+003	7.421878e+002	7194.5	39	1.031001e+001	0	0	0	0	0	0	7123.07	1	1	46.1809	39.0741
DATA	243	3	73	0	0	A_64_P030630	NM_001109610	8557.97	197.215	9.633995e+003	9.634866e+002	9326	41	1.102688e+001	0	0	0	0	0	0	9220.86	1	1	45.835	41.8491
DATA	244	3	74	0	0	A_44_P126366	NM_001017456	8583.5	197.486	2.003314e+002	2.388100e+001	296	41.5	9.539868e+000	0	0	0	0	0	0	191.156	1	1	49.1849	42.4815
DATA	245	3	75	0	0	A_43_P15627	ENSRNOT00000067029	8608.58	197.427	5.936233e+001	1.432772e+001	161	39	8.330666e+000	0	0	0	0	0	0	56.4652	1	0	57.5363	39
DATA	246	3	76	0	0	A_42_P754784	CB328432	8634.13	197.529	1.018700e+004	1.018784e+003	9489.5	38	9.050335e+000	0	0	0	0	0	0	9657.59	1	1	47.8731	38.36
DATA	247	3	77	66	1	DarkCorner	DarkCorner	8659.46	197.261	1.318031e+001	1.312901e+001	88	38	8.371209e+000	0	0	0	0	0	0	-21.891	0	0	46.8651	37.62
DATA	248	3	78	66	1	DarkCorner	DarkCorner	8684.91	197.257	1.322756e+001	1.317608e+001	91	37	6.020906e+000	0	0	0	0	0	0	-18.7191	0	0	48.2044	36.9153
DATA	249	3	79	66	1	DarkCorner	DarkCorner	8710.33	197.5	1.327627e+001	1.322460e+001	90	39	6.392593e+000	0	0	0	0	0	0	-19.0168	0	0	65	38.1667
DATA	250	3	80	66	1	DarkCorner	DarkCorner	8735.5	197.5	1.332641e+001	1.327454e+001	85	36	9.732944e+000	0	0	0	0	0	0	-23.823	0	0	57.5363	36.38
DATA	251	3	81	66	1	DarkCorner	DarkCorner	8760.95	197.649	1.337859e+001	1.332652e+001	99	37	9.658929e+000	0	0	0	0	0	0	-13.316	0	0	49.1849	38.5098
DATA	252	3	82	66	1	DarkCorner	DarkCorner	8786.44	197.534	1.343280e+001	1.338052e+001	88.5	35	7.871442e+000	0	0	0	0	0	0	-22.4003	0	0	49.1849	35.86
DATA	253	3	83	66	1	DarkCorner	DarkCorner	8811.58	197.573	1.348763e+001	1.343514e+001	91	32	7.310802e+000	0	0	0	0	1	0	-22.0962	0	0	57.5363	33.413
DATA	254	3	84	66	1	DarkCorner	DarkCorner	8837.03	198.031	1.354406e+001	1.349134e+001	94	37	8.949323e+000	0	0	0	0	0	0	-21.5752	0	0	46.8651	37.1591
DATA	255	3	85	66	1	DarkCorner	DarkCorner	8862.94	197.343	1.360458e+001	1.355163e+001	102	37	8.712173e+000	0	0	0	0	0	0	-13.9195	0	0	45.835	37.6667
DATA	256	4	1	66	1	DarkCorner	DarkCorner	6742.5	203	1.598319e+001	1.592098e+001	95	37.5	1.099014e+001	0	0	0	0	0	0	-14.9602	0	0	54.1152	40.1957
DATA	257	4	2	66	1	DarkCorner	DarkCorner	6767.71	203.125	1.586699e+001	1.580524e+001	92.5	47	7.469055e+000	0	0	0	0	0	0	-17.1024	0	0	47.5395	46.1351
DATA	258	4	3	66	1	DarkCorner	DarkCorner	6792.71	203.133	1.575338e+001	1.569207e+001	89	38	9.411671e+000	0	0	0	0	0	0	-20.2753	0	0	48.8603	38.2727
DATA	259	4	4	66	1	DarkCorner	DarkCorner	6818.18	203.324	1.563849e+001	1.557763e+001	88	37	9.097837e+000	0	0	0	0	0	0	-19.6562	0	0	47.8731	38.0278
DATA	260	4	5	66	1	DarkCorner	DarkCorner	6843.72	203.346	1.552526e+001	1.546484e+001	95	40	7.588368e+000	0	0	0	0	0	0	-17.3631	0	0	51.0895	41.4
DATA	261	4	6	66	1	DarkCorner	DarkCorner	6869.25	203.4	1.541353e+001	1.535354e+001	92	39	1.081655e+001	0	0	0	0	0	0	-15.47	0	0	49.1849	39.7419
DATA	262	4	7	66	1	DarkCorner	DarkCorner	6894.18	203.319	1.530640e+001	1.524682e+001	87	44	7.716882e+000	0	0	0	0	0	0	-21.7123	0	0	47.8731	42.0714
DATA	263	4	8	66	1	DarkCorner	DarkCorner	6920.09	203.386	1.519640e+001	1.513725e+001	94	40.5	1.005334e+001	0	0	0	0	0	0	-14.326	0	0	57.259	41.1053
DATA	264	4	9	66	1	DarkCorner	DarkCorner	6945.12	203.733	1.509118e+001	1.503244e+001	95	40	8.250083e+000	0	0	0	0	0	0	-14.067	0	0	48.8603	42.3714
DATA	265	4	10	0	0	A_44_P807031	NM_001108921	6970.57	203.392	9.962394e+003	9.963513e+002	8189.5	39	1.075429e+001	0	0	0	0	0	0	8277.02	1	1	49.1849	41.3929
DATA	266	4	11	0	0	A_64_P025813	NM_001009379	6996.42	203.427	1.488361e+001	1.482569e+001	107	39.5	9.669480e+000	0	0	0	0	0	0	-2.7081	0	0	57.5363	40.1333
DATA	267	4	12	0	0	A_64_P130551	XM_001081846	7021.37	203.507	3.659400e+001	1.517522e+001	136	42	1.006227e+001	0	0	0	0	0	0	30.8202	1	0	49.8279	43.973
DATA	268	4	13	0	0	A_42_P715449	NM_001033709	7047	203.455	4.101727e+003	4.104335e+002	3408	45	1.033350e+001	0	0	0	0	0	0	3477.86	1	1	55.8519	47.1563
DATA	269	4	14	0	0	A_42_P727584	NM_031622	7072.5	203.5	1.356999e+004	1.357077e+003	11281	48	1.191756e+001	0	0	0	0	0	0	11582.3	1	1	49.1849	46.6875
DATA	270	4	15	0	0	A_42_P600642	NM_001008386	7097.63	203.5	1.294816e+003	1.302843e+002	1223	45	8.971465e+000	0	0	0	0	0	0	1112.26	1	1	47.8731	44.7778
DATA	271	4	16	0	0	A_42_P669103	NM_001108329	7123.46	203.397	2.644276e+003	2.648165e+002	2369	46	9.696563e+000	0	0	0	0	0	0	2286.18	1	1	49.8279	45.76
DATA	272	4	17	0	0	A_44_P715330	NM_001024966	7148.5	203.5	1.644763e+003	1.650932e+002	1467	47	9.164606e+000	0	0	0	0	0	0	1430.85	1	1	49.1849	46.36
DATA	273	4	18	0	0	A_64_P083185	NM_001107199	7174.04	203.667	2.308411e+003	2.312756e+002	2074	48.5	1.115561e+001	0	0	0	0	0	0	2020.67	1	1	48.5334	48.4375
DATA	274	4	19	0	0	A_64_P037313	ENSRNOT00000030164	7199.42	203.427	4.707501e+001	1.485115e+001	148	41	9.711859e+000	0	0	0	0	0	0	41.4549	1	0	57.5363	43.0345
DATA	275	4	20	0	0	A_44_P321009	NM_012540	7224.63	204.082	4.068933e+001	1.458116e+001	145	45.5	1.173637e+001	0	0	0	0	0	0	36.0449	1	0	48.5334	46.1364
DATA	276	4	21	0	0	A_42_P700753	FQ212883	7250.13	203.578	5.194244e+003	5.196109e+002	4666	45	8.416957e+000	0	0	0	0	0	0	4627.85	1	1	51.0895	43.6129
DATA	277	4	22	0	0	A_44_P775974	NM_001024363	7275.5	203.5	1.447192e+001	1.391908e+001	123	43	1.206744e+001	0	0	0	0	0	0	12.9666	1	0	57.5363	43.7941
DATA	278	4	23	0	0	A_44_P503868	A_44_P503868	7300.86	204	1.098051e+004	1.098137e+003	10074	42	1.295973e+001	0	0	0	0	0	0	9893.18	1	1	42.5954	43.9583
DATA	279	4	24	0	0	A_64_P122541	A_64_P122541	7326.01	203.722	3.419905e+002	3.683898e+001	416	38	9.065829e+000	0	0	0	0	0	0	309.759	1	1	47.5395	39.4516
DATA	280	4	25	0	0	A_64_P080967	NM_001033890	7351.78	203.824	1.910852e+004	1.910901e+003	17161	43	9.545252e+000	0	0	0	0	0	0	17399.8	1	1	48.2044	44.3871
DATA	281	4	26	0	0	A_44_P1056309	NM_001105912	7377.11	203.5	1.037252e+002	1.706706e+001	203	45	8.585685e+000	0	0	0	0	0	0	94.9263	1	1	56.9804	44.7742
DATA	282	4	27	0	0	A_44_P199514	NM_001005564	7402.64	204.227	6.606847e+003	6.608223e+002	6075.5	42	8.849793e+000	0	0	0	0	0	0	6076.86	1	1	45.835	41.6667
DATA	283	4	28	0	0	A_64_P097952	NM_001134962	7427.67	203.5	8.530837e+001	1.590455e+001	185	35	9.242475e+000	0	0	0	0	0	0	78.8298	1	1	57.5363	37.0294
DATA	284	4	29	0	0	A_42_P813939	NM_001108741	7453.26	203.778	9.104710e+003	9.105691e+002	8444	43.5	1.498045e+001	0	0	0	0	0	0	8452.76	1	1	47.5395	44.5769
DATA	285	4	30	0	0	A_64_P006423	NM_012584	7478.58	203.573	2.808289e+001	1.359457e+001	130	42.5	1.087276e+001	0	0	0	0	0	0	26.1877	1	0	57.5363	42.9286
DATA	286	4	31	0	0	A_42_P670614	NM_001107097	7504	203.681	1.197305e+004	1.197378e+003	10965	44.5	1.013294e+001	0	0	0	0	0	0	11213.3	1	1	46.5243	44.0313
DATA	287	4	32	0	0	A_64_P084088	NM_001011954	7529.56	203.894	9.991744e+002	1.007841e+002	1029	42	1.148805e+001	0	0	0	0	0	0	939.691	1	1	45.4864	43.8462
DATA	288	4	33	0	0	A_64_P025643	XM_001073566	7554.58	203.573	3.254066e+002	3.509267e+001	414.5	40	7.461395e+000	0	0	0	0	0	0	307.225	1	1	57.5363	39.3793
DATA	289	4	34	0	0	A_42_P719607	NM_153721	7580.13	203.947	3.054630e+001	1.343900e+001	136.5	41	6.181859e+000	0	0	0	0	0	0	28.9509	1	0	47.8731	41.1538
DATA	290	4	35	0	0	A_42_P843603	NM_052800	7605.44	204.29	6.566138e+002	6.694364e+001	723	40	9.760431e+000	0	0	0	0	0	0	624.589	1	1	46.8651	42.1379
DATA	291	4	36	0	0	A_44_P234129	NM_001135802	7630.84	204.179	8.677448e+002	8.774210e+001	922	40	1.042815e+001	0	0	0	0	0	0	828.273	1	1	46.1809	40.8718
DATA	292	4	37	0	0	A_42_P701161	NM_001033666	7656.49	203.881	2.739529e+004	2.739560e+003	25638.5	43.5	8.185774e+000	0	0	0	1	0	0	26235.3	1	1	46.1809	43.4
DATA	293	4	38	0	0	A_44_P1017335	NM_001108607	7681.91	204.182	1.719433e+004	1.719482e+003	16319	41	1.027087e+001	0	0	0	0	0	0	16517.8	1	1	45.835	42.7429
DATA	294	4	39	0	0	A_44_P900209	CV121387	7707.42	203.573	1.497567e+002	1.974895e+001	255	41	6.591240e+000	0	0	0	0	0	0	144.282	1	1	57.5363	41.5
DATA	295	4	40	0	0	A_64_P037517	ENSRNOT00000014921	7732.77	203.913	1.776563e+002	2.191929e+001	276	40	7.778110e+000	0	0	0	0	0	0	171.634	1	1	46.5243	40.7813
DATA	296	4	41	0	0	A_64_P128528	NM_001106013	7758	204	4.352739e+003	4.354623e+002	4450	39	1.169626e+001	0	0	0	0	0	0	4215.94	1	1	46.8651	40.8125
DATA	297	4	42	0	0	A_64_P378865	NM_001000706	7783.34	203.843	1.399580e+002	1.895010e+001	242	46	1.310608e+001	0	0	0	0	0	0	135.881	1	1	47.2035	44.6667
DATA	298	4	43	0	0	A_42_P553960	NM_001107831	7808.91	204.104	1.196580e+004	1.196648e+003	11467	45	7.699451e+000	0	0	0	0	0	0	11643.1	1	1	46.8651	44.1923
DATA	299	4	44	0	0	A_42_P717654	XM_001063683	7834.39	204.08	9.065628e+003	9.066521e+002	8763.5	42	1.219817e+001	0	0	0	0	0	0	8838.98	1	1	49.1849	42.3462
DATA	300	4	45	0	0	A_44_P295118	NM_001107228	7859.64	203.781	1.192522e+003	1.199264e+002	1275	43.5	1.202638e+001	0	0	0	0	0	0	1164.8	1	1	44.7812	44.9231
DATA	301	4	46	0	0	A_64_P049057	ENSRNOT00000014519	7884.88	204	2.044963e+003	2.048889e+002	2101	48	1.041279e+001	0	0	0	0	0	0	2000.73	1	1	49.8279	46.3636
DATA	302	4	47	0	0	A_42_P810287	NM_001004107	7910.32	204.012	8.541782e+003	8.542720e+002	8391	41.5	8.661979e+000	0	0	0	0	0	0	8369.26	1	1	49.1849	41.9333
DATA	303	4	48	0	0	A_42_P702729	NM_001107557	7935.76	204	3.906957e+003	3.909002e+002	3864	41	1.059621e+001	0	0	0	0	0	0	3832.94	1	1	46.8651	42.7097
DATA	304	4	49	0	0	A_42_P811084	NM_173147	7961.12	204.385	6.932036e+003	6.933187e+002	6760	41	1.157398e+001	0	0	0	0	0	0	6808.26	1	1	53.8203	44.0968
DATA	305	4	50	0	0	A_64_P151473	A_64_P151473	7986.5	204.352	6.725668e+004	6.725679e+003	66522	40.5	1.126008e+001	0	0	0	0	0	0	66115.4	1	1	57.5363	40.2813
DATA	306	4	51	0	0	A_44_P134634	ENSRNOT00000000260	8011.83	204.38	2.983666e+002	3.239146e+001	399	38	9.281816e+000	0	0	0	0	0	0	293.515	1	1	47.5395	40.1786
DATA	307	4	52	0	0	A_44_P178479	NM_001135039	8037.37	204.37	1.833053e+003	1.837379e+002	1860	42.5	4.836268e+000	0	0	0	0	0	0	1804.22	1	1	48.2044	42.4583
DATA	308	4	53	0	0	A_64_P317400	ENSRNOT00000068382	8062.58	204.427	2.143762e+001	1.277862e+001	128	43	7.683069e+000	0	0	0	0	0	0	21.1078	1	0	57.5363	41.3793
DATA	309	4	54	0	0	A_42_P781735	NM_053319	8087.81	204.141	1.071605e+005	1.071606e+004	105370	45	1.023415e+001	0	0	0	0	0	0	105528	1	1	49.5074	45.7407
DATA	310	4	55	0	0	A_64_P144869	NM_017131	8113.47	204.222	5.390570e+002	5.535770e+001	627	46	1.171182e+001	0	0	0	0	0	0	530.841	1	1	47.8731	45
DATA	311	4	56	0	0	A_44_P445484	ENSRNOT00000049980	8138.94	204.224	2.357267e+003	2.360631e+002	2393	42	1.012326e+001	0	0	0	0	0	0	2320.89	1	1	45.835	42.7297
DATA	312	4	57	0	0	A_42_P487832	NM_001108389	8164.43	204.392	3.887687e+003	3.889729e+002	3875.5	45.5	8.445593e+000	0	0	0	0	0	0	3826.28	1	1	49.1849	46.0714
DATA	313	4	58	0	0	A_42_P482829	NM_001108138	8189.87	204.5	3.659817e+003	3.661989e+002	3676.5	40	9.060608e+000	0	0	0	0	0	0	3600.03	1	1	49.8279	41.8065
DATA	314	4	59	0	0	A_64_P101440	XM_001065775	8215.24	204.36	2.289864e+002	2.614550e+001	328.5	42.5	9.995110e+000	0	0	0	0	0	0	225.079	1	1	49.1849	42.0313
DATA	315	4	60	0	0	A_64_P072268	NM_001002277	8240.56	204.521	2.191336e+003	2.194973e+002	2295.5	43	1.185105e+001	0	0	0	0	0	0	2152.02	1	1	48.2044	45.7037
DATA	316	4	61	0	0	A_42_P589190	NM_023104	8266	204.271	2.569002e+003	2.572111e+002	2572	41	8.575623e+000	0	0	0	0	0	0	2520.15	1	1	46.8651	43.1852
DATA	317	4	62	0	0	A_64_P027328	A_64_P027328	8291.33	204.5	7.441819e+002	7.548734e+001	834.5	47	1.348695e+001	0	0	0	0	0	0	729.127	1	1	57.5363	46.0909
DATA	318	4	63	0	0	A_42_P788541	NM_001106794	8316.49	204.568	1.493606e+004	1.493659e+003	14576	40	1.068090e+001	0	0	0	0	0	0	14613.4	1	1	50.4627	43.1923
DATA	319	4	64	0	0	A_42_P457003	NM_012802	8341.74	204.453	1.745185e+004	1.745231e+003	17296	41	8.200577e+000	0	0	0	0	0	0	17047.8	1	1	52.0157	38.129
DATA	320	4	65	0	0	A_64_P095695	A_64_P095695	8367.5	204.5	2.806932e+002	4.314871e+001	203.5	36	7.291450e+000	0	1	0	0	0	0	273.708	1	1	57.5363	36.3704
DATA	321	4	66	0	0	A_42_P463880	NM_001013927	8392.67	204.5	2.058608e+002	2.421171e+001	309	45.5	1.032559e+001	0	0	0	0	0	0	200.357	1	1	57.5363	43.6071
DATA	322	4	67	0	0	A_43_P20354	NM_001134574	8418.05	204.608	1.875213e+002	2.268779e+001	288.5	40.5	1.050638e+001	0	0	0	0	0	0	182.131	1	1	49.1849	40.6842
DATA	323	4	68	0	0	A_64_P055958	ENSRNOT00000056114	8443.58	204.662	5.016605e+001	1.374744e+001	155	40	8.442795e+000	0	0	0	0	0	0	48.615	1	0	49.8279	42.069
DATA	324	4	69	0	0	A_64_P159044	ENSRNOT00000040690	8468.89	204.5	8.132466e+002	8.233049e+001	896	41	7.109871e+000	0	0	0	0	0	0	786.223	1	1	56.9804	39.5714
DATA	325	4	70	0	0	A_44_P473234	ENSRNOT00000024858	8494.42	204.573	1.249962e+003	1.256562e+002	1288.5	47	7.051441e+000	0	0	0	0	0	0	1205.35	1	1	57.5363	46.625
DATA	326	4	71	0	0	A_42_P797965	NM_001108497	8519.55	204.653	2.469309e+003	2.472674e+002	2487.5	46	1.030661e+001	0	0	0	0	0	0	2374.88	1	1	49.5074	45.1786
DATA	327	4	72	0	0	A_42_P592157	NM_001002828	8545.36	204.4	7.622199e+002	7.731162e+001	824.5	38	1.135154e+001	0	0	0	0	0	0	730.956	1	1	47.8731	39.6296
DATA	328	4	73	0	0	A_64_P016419	NM_001000622	8570.36	204.727	2.164424e+001	1.315114e+001	128	43	9.688244e+000	0	0	0	0	0	0	20.6963	1	0	50.1463	43.8276
DATA	329	4	74	0	0	A_44_P306863	XM_344447	8596.19	204.559	3.826813e+003	3.829025e+002	3809	41.5	7.762569e+000	0	0	0	0	0	0	3647.64	1	1	46.8651	41.1333
DATA	330	4	75	0	0	A_42_P471835	TC610276	8621.46	204.824	1.698788e+004	1.698838e+003	15940	39	8.262951e+000	0	0	0	0	0	0	16140.7	1	1	48.8603	40.2593
DATA	331	4	76	0	1	ETG02_36680	ETG02_36680	8646.58	204.573	1.314972e+001	1.309938e+001	111	38	6.152548e+000	0	0	0	0	0	0	1.40583	0	0	57.5363	39.4231
DATA	332	4	77	66	1	DarkCorner	DarkCorner	8672	204.545	1.319577e+001	1.314442e+001	83.5	39	4.940942e+000	0	0	0	0	0	0	-26.404	0	0	55.8519	39.2903
DATA	333	4	78	66	1	DarkCorner	DarkCorner	8697.76	204.782	1.324394e+001	1.319240e+001	87.5	40	5.831384e+000	0	0	0	0	0	0	-22.2353	0	0	50.1463	39.2286
DATA	334	4	79	66	1	DarkCorner	DarkCorner	8723.08	204.797	1.329325e+001	1.324151e+001	88	34	9.269922e+000	0	0	0	0	0	0	-22.4626	0	0	47.8731	35.4375
DATA	335	4	80	66	1	DarkCorner	DarkCorner	8748.47	204.882	1.334426e+001	1.329232e+001	86.5	37	8.498817e+000	0	0	0	0	0	0	-22.2976	0	0	49.8279	37.3333
DATA	336	4	81	66	1	DarkCorner	DarkCorner	8773.75	204.852	1.339679e+001	1.334465e+001	89	36.5	8.505834e+000	0	0	0	0	0	0	-22.8489	0	0	50.4627	38.8571
DATA	337	4	82	66	1	DarkCorner	DarkCorner	8799.13	205.015	1.345084e+001	1.339849e+001	90.5	33	1.092020e+001	0	0	0	0	0	0	-20.1908	0	0	46.8651	35.5926
DATA	338	4	83	66	1	DarkCorner	DarkCorner	8824.56	204.972	1.350678e+001	1.345421e+001	92	36	9.804977e+000	0	0	0	0	0	0	-21.3428	0	0	48.2044	37.2857
DATA	339	4	84	66	1	DarkCorner	DarkCorner	8849.74	205.043	1.356346e+001	1.351067e+001	90	36	8.241202e+000	0	0	0	0	0	0	-22.0134	0	0	46.5243	37.1622
DATA	340	4	85	66	1	DarkCorner	DarkCorner	8875.74	205.026	1.362355e+001	1.357052e+001	102	35	9.364960e+000	0	0	0	0	0	0	-13.0629	0	0	49.1849	36.1984
DATA	341	5	1	66	1	DarkCorner	DarkCorner	6729.58	210.427	1.601965e+001	1.595730e+001	96.5	40	9.475989e+000	0	0	0	0	0	0	-14.0145	0	0	57.5363	40.2392
DATA	342	5	2	66	1	DarkCorner	DarkCorner	6754.96	210.889	1.590175e+001	1.583986e+001	94	47	9.904421e+000	0	0	0	0	0	0	-16.8576	0	0	46.8651	44.9512
DATA	343	5	3	66	1	DarkCorner	DarkCorner	6780.32	211.094	1.578598e+001	1.572453e+001	92	44	8.658119e+000	0	0	0	0	0	0	-16.6763	0	0	41.0736	43.4857
DATA	344	5	4	66	1	DarkCorner	DarkCorner	6805.51	211.04	1.567309e+001	1.561209e+001	91.5	38	1.059600e+001	0	0	0	0	0	0	-16.1792	0	0	48.5334	37.8571
DATA	345	5	5	66	1	DarkCorner	DarkCorner	6830.63	210.733	1.556257e+001	1.550199e+001	91.5	40	7.430084e+000	0	0	0	0	0	0	-18.0507	0	0	49.1849	41.6154
DATA	346	5	6	66	1	DarkCorner	DarkCorner	6856.43	210.553	1.545012e+001	1.538999e+001	97.5	39.5	8.559394e+000	0	0	0	0	0	0	-12.5892	0	0	49.5074	41.6786
DATA	347	5	7	66	1	DarkCorner	DarkCorner	6881.89	210.5	1.534043e+001	1.528072e+001	94	44.5	8.001359e+000	0	0	0	0	0	0	-12.4009	0	0	65	42.25
DATA	348	5	8	66	1	DarkCorner	DarkCorner	6907.5	210.5	1.523162e+001	1.517233e+001	89.5	43	1.060267e+001	0	0	0	0	0	0	-18.8435	0	0	57.5363	41.6667
DATA	349	5	9	66	1	DarkCorner	DarkCorner	6932.83	210.701	1.512520e+001	1.506634e+001	91	42	8.333908e+000	0	0	0	0	0	0	-15.3735	0	0	49.5074	42.1667
DATA	350	5	10	0	0	A_43_P17919	XM_001070979	6958.33	210.5	5.581147e+001	1.596941e+001	157	41	1.102187e+001	0	0	0	0	0	0	46.2673	1	0	65	44.0333
DATA	351	5	11	0	0	A_42_P826221	NM_012933	6983.5	211	7.447863e+003	7.449345e+002	6168	44	1.144714e+001	0	0	0	0	0	0	6216.77	1	1	48.5334	42.4138
DATA	352	5	12	0	0	A_64_P011524	NM_001194951	7008.62	210.917	2.623386e+003	2.627535e+002	2309	44.5	9.645132e+000	0	0	0	0	0	0	2204.44	1	1	50.7771	45
DATA	353	5	13	0	0	A_44_P258417	NM_001009699	7034.38	210.73	4.961775e+002	5.173863e+001	523	42.5	8.558853e+000	0	0	0	0	0	0	419.765	1	1	48.5334	43.0556
DATA	354	5	14	0	0	A_64_P164617	A_64_P164617	7059.58	210.573	7.690149e+004	7.690163e+003	65817.5	50	9.273618e+000	0	0	0	0	0	0	65484.1	1	1	57.5363	50.2
DATA	355	5	15	0	0	A_42_P758933	NM_001106476	7085.15	210.836	1.553256e+004	1.553324e+003	12728.5	47	1.098113e+001	0	0	0	1	0	0	13313.8	1	1	47.5395	46.0909
DATA	356	5	16	0	0	A_42_P573312	NM_001134761	7110.52	210.853	2.365914e+003	2.370280e+002	2079	46	8.075841e+000	0	0	0	1	0	0	2040.95	1	1	49.8279	45.8276
DATA	357	5	17	0	0	A_64_P096257	NM_001160228	7135.74	210.711	1.656214e+003	1.662367e+002	1494.5	39.5	1.031738e+001	0	0	0	0	0	0	1437.65	1	1	49.5074	40.3214
DATA	358	5	18	0	0	A_43_P15847	NM_178847	7161.38	210.895	8.776452e+002	8.890589e+001	864	49	1.053295e+001	0	0	0	0	0	0	766.61	1	1	49.5074	49.5926
DATA	359	5	19	0	0	A_64_P139962	NM_001000675	7186.58	210.573	2.454668e+001	1.432752e+001	128	45	1.155110e+001	0	0	0	0	0	0	21.5696	1	0	57.5363	47.1935
DATA	360	5	20	0	0	A_64_P117474	NM_001000646	7212	210.545	2.646379e+001	1.427941e+001	126.5	46.5	1.272630e+001	0	0	0	0	0	0	23.3928	1	0	55.8519	47.8
DATA	361	5	21	0	1	ERCC-00075_180	ERCC-00075_180	7237.5	210.648	6.601747e+001	1.543342e+001	164	47	1.217531e+001	0	0	0	0	0	0	58.6991	1	0	57.5363	47.3571
DATA	362	5	22	0	0	A_42_P740730	NM_001012136	7262.58	210.573	6.887807e+001	1.548801e+001	167	43.5	8.691626e+000	0	0	0	0	0	0	61.587	1	0	57.5363	43.5625
DATA	363	5	23	0	0	A_42_P702258	NM_017227	7288.36	210.944	1.016333e+003	1.025650e+002	1015	39	1.081395e+001	0	0	0	0	0	0	913.923	1	1	48.5334	41.6923
DATA	364	5	24	0	0	A_42_P668800	NM_001127553	7313.64	210.781	2.091959e+003	2.096453e+002	1950	36	1.234681e+001	0	0	0	0	0	0	1891.3	1	1	48.2044	41.5909
DATA	365	5	25	0	0	A_42_P842513	NM_031077	7339.07	211.449	1.020996e+004	1.021088e+003	9278.5	43	8.164074e+000	0	0	0	0	0	0	9280.16	1	1	46.5243	42.3714
DATA	366	5	26	0	0	A_64_P047697	NM_001161835	7364.56	211.028	3.148010e+002	3.428311e+001	392.5	43	8.711304e+000	0	0	0	0	0	0	287.597	1	1	48.2044	43.1471
DATA	367	5	27	0	0	A_42_P660036	NM_001134727	7389.78	211.11	1.126441e+003	1.134513e+002	1104	45.5	9.708108e+000	0	0	0	1	0	0	1034.21	1	1	47.8731	44.8929
DATA	368	5	28	0	0	A_64_P095050	A_64_P095050	7415.5	211	7.557244e+004	7.557256e+003	70124	39.5	7.889331e+000	0	0	0	0	0	0	69724.3	1	1	54.1152	39.8077
DATA	369	5	29	0	0	A_42_P561835	ENSRNOT00000043937	7441	211	6.449980e+002	6.587320e+001	698	34.5	1.244990e+001	0	0	0	0	0	0	597.885	1	1	46.8651	37.5
DATA	370	5	30	0	0	A_64_P098774	ENSRNOT00000002068	7466	211	4.001435e+001	1.390969e+001	147	42	1.304775e+001	0	0	0	0	0	0	37.257	1	0	54.9904	44.6207
DATA	371	5	31	0	0	A_64_P163184	NM_001107855	7491.37	211	9.185467e+002	9.280737e+001	984	41.5	7.411113e+000	0	0	0	0	0	0	858.983	1	1	46.5243	41.9643
DATA	372	5	32	0	0	A_42_P549675	NM_080577	7516.92	211.099	8.898147e+003	8.899127e+002	8162	47	9.329359e+000	0	0	0	0	0	0	8356.43	1	1	46.8651	45.5862
DATA	373	5	33	0	0	A_64_P287740	NM_001127601	7542	211.203	1.782054e+002	2.215018e+001	275	40.5	8.990992e+000	0	0	0	0	0	0	168.026	1	1	46.8651	42.3
DATA	374	5	34	0	0	A_64_P059545	NM_053477	7567.43	211.231	6.837024e+003	6.838279e+002	6675	40.5	7.487018e+000	0	0	0	0	0	0	6471.5	1	1	45.4864	40.5938
DATA	375	5	35	0	0	A_44_P465856	NM_199398	7592.91	211.386	1.310665e+001	1.305929e+001	108	39.5	6.945831e+000	0	0	0	0	0	0	2.93558	0	0	57.259	39.625
DATA	376	5	36	0	0	A_42_P714075	NM_031723	7618.2	211.378	4.685376e+003	4.687182e+002	4489	39.5	9.025446e+000	0	0	0	1	0	0	4467.07	1	1	49.1849	40.3438
DATA	377	5	37	0	0	A_42_P605265	NM_053677	7643.7	211.216	9.592260e+001	1.612878e+001	200.5	41.5	8.024094e+000	0	0	0	0	0	0	91.7604	1	1	48.8603	42.5313
DATA	378	5	38	0	0	A_64_P047401	NM_001009369	7669.13	210.855	6.166226e+003	6.167580e+002	6064	42	7.694717e+000	0	0	0	0	0	0	5917.3	1	1	45.4864	42.7813
DATA	379	5	39	0	0	A_64_P018891	A_64_P018891	7694.39	211.203	1.951214e+002	2.338354e+001	293	43	7.860614e+000	0	0	0	0	0	0	187.809	1	1	47.2035	43.5484
DATA	380	5	40	0	0	A_64_P026297	NM_022583	7719.75	211.26	8.548397e+001	1.543395e+001	190	42	8.998211e+000	0	0	0	0	0	0	82.5128	1	1	48.8603	42.303
DATA	381	5	41	0	0	A_43_P13508	NM_001015031	7745.26	211.264	2.316620e+002	2.647509e+001	333.5	37	1.036895e+001	0	0	0	0	0	0	224.204	1	1	47.5395	39.0313
DATA	382	5	42	0	0	A_64_P077426	XM_001080794	7770.75	211.373	1.987887e+004	1.987928e+003	19297	43	1.290667e+001	0	0	0	0	0	0	19286.6	1	1	49.1849	43.7143
DATA	383	5	43	0	0	A_44_P370175	NM_031773	7796	211.455	4.439333e+002	4.618954e+001	533	45	9.766505e+000	0	0	0	0	0	0	431.687	1	1	55.8519	46
DATA	384	5	44	0	0	A_64_P084288	NM_001000496	7821.42	211.427	1.468207e+001	1.281328e+001	120.5	44	1.098308e+001	0	0	0	0	0	0	14.307	1	0	57.5363	42.7813
DATA	385	5	45	0	0	A_44_P400936	A_44_P400936	7846.97	211.147	1.700384e+003	1.705123e+002	1799	38	9.460201e+000	0	0	0	0	0	0	1660.11	1	1	46.8651	38.4333
DATA	386	5	46	0	0	A_64_P019599	NM_012713	7872.49	211.13	9.631772e+002	9.714912e+001	1054.5	47	9.901098e+000	0	0	0	0	0	0	941.998	1	1	47.2035	45.4286
DATA	387	5	47	0	0	A_44_P644356	AI556299	7897.35	211.472	3.058185e+001	1.302721e+001	134	42	9.253105e+000	0	0	0	0	0	0	29.9553	1	0	48.2044	42.1563
DATA	388	5	48	0	0	A_64_P057076	A_64_P057076	7923	211.455	2.026892e+002	2.389026e+001	303	42	1.060857e+001	0	0	0	0	0	0	198.809	1	1	55.8519	41.6667
DATA	389	5	49	0	0	A_64_P087392	NM_001108764	7948.5	211.5	3.247671e+002	3.484644e+001	437.5	43	1.155355e+001	0	0	0	0	0	0	318.928	1	1	57.5363	44.7308
DATA	390	5	50	0	0	A_44_P436604	NM_001025627	7973.67	211.5	2.370955e+002	2.685827e+001	333.5	44	1.187371e+001	0	0	0	0	0	0	233.062	1	1	57.5363	43.5806
DATA	391	5	51	0	0	A_43_P23200	NM_001107832	7999.44	211.534	1.666136e+003	1.670900e+002	1724.5	42	1.491807e+001	0	0	0	0	0	0	1639.13	1	1	49.1849	43.875
DATA	392	5	52	0	0	A_42_P515876	NM_031097	8024.94	211.768	2.772099e+003	2.774961e+002	2818	42	5.539550e+000	0	0	0	0	0	0	2728.91	1	1	46.5243	41.9259
DATA	393	5	53	0	0	A_44_P1047924	NM_053523	8050.13	211.386	1.106530e+004	1.106602e+003	10813	43	8.603950e+000	0	0	0	0	0	0	10897.4	1	1	51.4001	42.8065
DATA	394	5	54	0	0	A_44_P682668	NM_001014228	8075.42	211.573	2.009238e+002	2.371177e+001	304.5	44	6.927680e+000	0	0	0	0	0	0	197.928	1	1	57.5363	42.9167
DATA	395	5	55	0	0	A_64_P061489	NM_001108746	8100.58	211.573	2.903398e+001	1.292092e+001	134.5	48	1.224117e+001	0	0	0	0	0	0	28.6033	1	0	65	47
DATA	396	5	56	0	0	A_64_P047747	NM_182474	8126.06	211.538	1.355794e+003	1.361628e+002	1456	41.5	7.156878e+000	0	0	0	0	0	0	1335.54	1	1	44.7812	41.4643
DATA	397	5	57	0	0	A_64_P091163	NM_001107083	8151.53	211.974	4.575011e+001	1.340029e+001	149	42.5	9.223159e+000	0	0	0	0	0	0	45.0548	1	0	49.5074	44.1
DATA	398	5	58	0	0	A_64_P133992	NM_001008825	8176.89	211.5	1.102317e+002	1.674222e+001	217.5	41.5	7.054875e+000	0	0	0	0	0	0	108.504	1	1	56.9804	41.5667
DATA	399	5	59	0	0	A_42_P503768	NM_001009466	8202.6	211.562	8.020093e+002	8.118612e+001	875	41.5	8.851002e+000	0	0	0	0	0	0	788.927	1	1	48.2044	41.0667
DATA	400	5	60	0	0	A_44_P400346	ENSRNOT00000059540	8227.58	211.573	1.322381e+002	1.827898e+001	235	45.5	1.218821e+001	0	0	0	0	0	0	129.977	1	1	57.5363	47.4118
DATA	401	5	61	0	0	A_64_P128438	NM_012591	8253.13	211.526	3.693917e+003	3.696076e+002	3732	40.5	1.220721e+001	0	0	0	0	0	0	3627.13	1	1	50.1463	44.5333
DATA	402	5	62	0	0	A_44_P531758	NM_012935	8278.5	211.648	5.752301e+004	5.752315e+003	56354	44	1.289270e+001	0	0	0	0	0	0	56417.9	1	1	57.5363	44.6875
DATA	403	5	63	0	0	A_43_P10257	NM_203335	8303.85	211.836	1.271555e+004	1.271618e+003	12538	41	1.072893e+001	0	0	0	0	0	0	12454.8	1	1	47.5395	42.1212
DATA	404	5	64	0	0	A_64_P011744	NM_001108789	8329.41	211.6	4.679877e+002	4.848685e+001	564	42	1.009501e+001	0	0	0	0	0	0	457.695	1	1	49.5074	41.7667
DATA	405	5	65	0	0	A_44_P282794	NM_001107523	8354.58	211.573	1.462271e+002	1.937021e+001	239	38	8.384707e+000	0	0	0	0	0	0	142.775	1	1	57.5363	38.4054
DATA	406	5	66	0	0	A_42_P463784	NM_001008526	8380.06	211.761	1.937846e+003	1.942021e+002	2006.5	42	1.283336e+001	0	0	0	1	0	0	1888.66	1	1	46.8651	43.8148
DATA	407	5	67	0	0	A_42_P630463	NM_022238	8405.38	212	9.287858e+002	9.374987e+001	1016	47	1.093471e+001	0	0	0	0	0	0	903.431	1	1	48.5334	43.4667
DATA	408	5	68	0	0	A_64_P006728	NM_001108905	8430.99	212.174	3.813679e+003	3.815820e+002	3754.5	39	9.134965e+000	0	0	0	0	0	0	3701.6	1	1	46.8651	41.6875
DATA	409	5	69	0	0	A_44_P360629	NM_001000030	8456.34	211.875	1.410573e+002	1.905359e+001	243	39	6.468669e+000	0	0	0	0	0	0	136.595	1	1	45.1352	38.4667
DATA	410	5	70	0	0	A_64_P024620	NM_001006995	8481.78	211.75	2.079466e+004	2.079506e+003	19820.5	43	7.614561e+000	0	0	0	0	0	0	20087.3	1	1	45.1352	41.6923
DATA	411	5	71	0	0	A_64_P091194	ENSRNOT00000049254	8507.14	211.808	1.817976e+004	1.818021e+003	17748	46.5	1.109796e+001	0	0	0	0	0	0	17515.9	1	1	47.5395	45.2692
DATA	412	5	72	0	0	A_44_P334922	NM_022379	8532.55	211.942	1.295952e+001	1.293187e+001	114	41	1.154357e+001	0	0	0	0	0	0	7.37414	0	0	47.5395	41.8125
DATA	413	5	73	0	0	A_42_P482051	XM_001059157	8557.9	212.014	3.735877e+003	3.738119e+002	3622	38	7.820273e+000	0	0	0	0	0	0	3579.32	1	1	46.8651	39.64
DATA	414	5	74	0	0	A_42_P674742	XM_002726367	8583.28	212.03	7.946456e+003	7.947516e+002	7488	43	7.026735e+000	0	0	0	0	0	0	7590.5	1	1	45.835	43.625
DATA	415	5	75	0	0	A_64_P105211	XM_233310	8608.43	212.103	1.120734e+002	1.718371e+001	214	42	7.699051e+000	0	0	0	0	0	0	106.72	1	1	46.5243	42.3462
DATA	416	5	76	0	0	A_64_P058523	NM_134385	8634	212	1.312026e+001	1.306920e+001	104	36	7.970852e+000	0	0	0	0	0	0	-6.14122	0	0	54.9904	36.9655
DATA	417	5	77	0	0	A_44_P586876	NM_001100805	8659.59	211.908	4.157452e+003	4.159520e+002	4002	38	8.863966e+000	0	0	0	0	0	0	3932.19	1	1	49.1849	40.3548
DATA	418	5	78	66	1	DarkCorner	DarkCorner	8684.53	212.487	1.321066e+001	1.315924e+001	85	40	7.571175e+000	0	0	0	0	0	0	-24.9289	0	0	50.4627	41.0286
DATA	419	5	79	66	1	DarkCorner	DarkCorner	8710.28	212.387	1.325972e+001	1.320811e+001	87.5	35	6.851509e+000	0	0	0	0	0	0	-22.1594	0	0	48.8603	35.4545
DATA	420	5	80	66	1	DarkCorner	DarkCorner	8735.52	212.328	1.330944e+001	1.325764e+001	87	38	1.043181e+001	0	0	0	0	0	0	-24.3343	0	0	46.5243	39.4138
DATA	421	5	81	66	1	DarkCorner	DarkCorner	8761.15	212.192	1.336165e+001	1.330965e+001	88	36	4.957667e+000	0	0	0	0	0	0	-22.5855	0	0	47.8731	35.4615
DATA	422	5	82	66	1	DarkCorner	DarkCorner	8786.36	212.108	1.341454e+001	1.336233e+001	88	39	9.026883e+000	0	0	0	0	0	0	-26.3558	0	0	48.8603	38.7308
DATA	423	5	83	66	1	DarkCorner	DarkCorner	8811.58	212.427	1.346842e+001	1.341600e+001	91	37	9.789176e+000	0	0	0	0	0	0	-23.7661	0	0	57.5363	36.8065
DATA	424	5	84	66	1	DarkCorner	DarkCorner	8837.13	212.114	1.352532e+001	1.347268e+001	94	35	9.081841e+000	0	0	0	0	0	0	-19.8185	0	0	46.8651	36.1875
DATA	425	5	85	66	1	DarkCorner	DarkCorner	8862.82	212.097	1.358359e+001	1.353072e+001	93	36	7.478827e+000	0	0	0	0	0	0	-20.6959	0	0	46.8651	36.0217
DATA	426	6	1	66	1	DarkCorner	DarkCorner	6741.97	217.789	1.593989e+001	1.587785e+001	91	41	1.017713e+001	0	0	0	0	0	0	-19.5477	0	0	46.8651	42.4792
DATA	427	6	2	66	1	DarkCorner	DarkCorner	6767.18	218.274	1.582399e+001	1.576240e+001	92	46	9.613446e+000	0	0	0	0	0	0	-17.0138	0	0	47.5395	45.0513
DATA	428	6	3	66	1	DarkCorner	DarkCorner	6793	217.545	1.571019e+001	1.564904e+001	90	39	7.700300e+000	0	0	0	0	0	0	-19.3185	0	0	55.8519	38.8065
DATA	429	6	4	66	1	DarkCorner	DarkCorner	6818.37	218.265	1.559558e+001	1.553488e+001	92	40	7.628528e+000	0	0	0	0	0	0	-18.3189	0	0	46.5243	42.25
DATA	430	6	5	66	1	DarkCorner	DarkCorner	6843.5	218.059	1.548607e+001	1.542580e+001	87	41	9.384990e+000	0	0	0	0	0	0	-20.0787	0	0	47.2035	43.3214
DATA	431	6	6	66	1	DarkCorner	DarkCorner	6869.42	217.573	1.537539e+001	1.531554e+001	94.5	42	7.568971e+000	0	0	0	0	0	0	-15.6176	0	0	57.5363	42.5313
DATA	432	6	7	66	1	DarkCorner	DarkCorner	6894.37	217.904	1.526827e+001	1.520885e+001	92	44	1.059729e+001	0	0	0	0	0	0	-17.082	0	0	48.5334	43.8571
DATA	433	6	8	66	1	DarkCorner	DarkCorner	6920.09	217.614	1.516117e+001	1.510216e+001	97	43	8.980718e+000	0	0	0	0	0	0	-12.7374	0	0	57.259	40.7941
DATA	434	6	9	0	0	A_64_P034324	NM_001108282	6945.5	217.648	2.980110e+002	3.336219e+001	361.5	42	7.829511e+000	0	0	0	0	0	0	246.468	1	1	57.5363	43.1765
DATA	435	6	10	0	0	A_64_P071506	ENSRNOT00000025007	6970.58	217.573	3.686994e+001	1.534604e+001	140	41	1.130070e+001	0	0	0	0	0	0	30.7	1	0	57.5363	43.1333
DATA	436	6	11	0	0	A_64_P050705	NM_001106061	6996.14	218.192	7.981296e+002	8.117244e+001	756.5	42.5	1.263446e+001	0	0	0	0	0	0	669.184	1	1	47.5395	43
DATA	437	6	12	0	0	A_64_P032242	NM_001008898	7021.15	218.29	1.956787e+001	1.482600e+001	120	45	1.029876e+001	0	0	0	0	0	0	16.5153	1	0	46.5243	45.4242
DATA	438	6	13	0	0	A_42_P730320	NM_001013877	7047	218	1.145456e+002	1.855581e+001	208	46	1.043629e+001	0	0	0	0	0	0	97.3256	1	1	65	43.871
DATA	439	6	14	0	0	A_64_P123073	A_64_P123073	7072.08	218.015	5.003902e+002	5.209883e+001	528	48	1.342658e+001	0	0	0	0	0	0	427.911	1	1	46.8651	49.8387
DATA	440	6	15	0	0	A_64_P064709	NM_001166303	7097.41	218.092	4.559667e+002	4.782007e+001	491	45.5	7.225116e+000	0	0	0	0	0	0	392.432	1	1	49.1849	44.7333
DATA	441	6	16	0	0	A_44_P123381	NM_013012	7123.03	218.044	1.003835e+002	1.748837e+001	195	42	1.051028e+001	0	0	0	0	0	0	86.9476	1	1	46.8651	42.1818
DATA	442	6	17	0	0	A_44_P557487	NM_053617	7148.31	218.137	3.304001e+001	1.461051e+001	136	41	8.877519e+000	0	0	0	0	0	0	28.7955	1	0	48.2044	41.8966
DATA	443	6	18	0	0	A_64_P084971	NM_017007	7173.84	218.103	4.807472e+004	4.807493e+003	41980	50	9.983361e+000	0	0	0	0	0	0	42156	1	1	46.5243	48.8966
DATA	444	6	19	0	0	A_42_P770556	NM_033096	7199.31	218.338	1.611648e+004	1.611709e+003	14057.5	46	1.179325e+001	0	0	0	0	0	0	14217.7	1	1	48.5334	46.375
DATA	445	6	20	0	0	A_64_P023381	XM_001073278	7224.58	218.427	1.755127e+002	2.243757e+001	265	51	1.159709e+001	0	0	0	0	0	0	155.74	1	1	57.5363	51.7241
DATA	446	6	21	0	0	A_64_P059217	NM_053667	7250.03	218.215	9.960427e+002	1.005693e+002	1003	47	1.396593e+001	0	0	0	0	0	0	888.897	1	1	45.835	49.2258
DATA	447	6	22	0	0	A_44_P286215	NM_001008885	7275.43	218.157	1.410236e+003	1.416992e+002	1371.5	42	1.203720e+001	0	0	0	0	0	0	1265.59	1	1	47.5395	44.6
DATA	448	6	23	0	0	A_64_P138056	A_64_P138056	7300.91	218.386	1.590623e+003	1.596551e+002	1515.5	34.5	1.128220e+001	0	0	0	0	0	0	1435.36	1	1	57.259	38.625
DATA	449	6	24	0	0	A_44_P280799	NM_001000654	7326.46	218.07	3.628865e+001	1.414589e+001	138	41	9.895421e+000	0	0	0	0	0	0	32.9211	1	0	47.8731	41.875
DATA	450	6	25	0	0	A_64_P111599	NM_001191586	7351.87	218.3	2.069571e+003	2.074036e+002	1999.5	41	7.308579e+000	0	0	0	0	0	0	1887.32	1	1	47.2035	42.4375
DATA	451	6	26	0	0	A_64_P088635	ENSRNOT00000059643	7377	218.455	6.017053e+001	1.481102e+001	166	44	9.761529e+000	0	0	0	0	0	0	55.1466	1	0	55.8519	43.2308
DATA	452	6	27	0	0	A_64_P042332	NM_021860	7402.5	218.352	1.352023e+001	1.351425e+001	117	43	8.130096e+000	0	0	0	0	0	0	10.3323	0	0	57.5363	41.5385
DATA	453	6	28	0	0	A_42_P599080	NM_053753	7427.58	218.427	1.332457e+002	1.890051e+001	231	35	8.897884e+000	0	0	0	0	0	0	123.296	1	1	57.5363	36.2121
DATA	454	6	29	0	0	A_44_P576954	NM_001106645	7453.41	218.169	1.236985e+003	1.244160e+002	1210	45	1.468705e+001	0	0	0	0	0	0	1149.93	1	1	47.5395	42.931
DATA	455	6	30	0	0	A_64_P046687	A_64_P046687	7478.61	218.406	1.613281e+004	1.613336e+003	15231.5	40.5	8.314264e+000	0	0	0	0	0	0	15063.7	1	1	47.5395	41.6429
DATA	456	6	31	0	0	A_42_P694928	NM_001109046	7504	218.455	2.407345e+002	2.746810e+001	332	43.5	9.384646e+000	0	0	0	0	0	0	225.743	1	1	55.8519	44.8438
DATA	457	6	32	0	0	A_64_P032811	NM_001134575	7529.31	218.6	1.250227e+002	1.816162e+001	228	40	8.681974e+000	0	0	0	0	0	0	117.718	1	1	47.5395	42.72
DATA	458	6	33	0	0	A_64_P141070	ENSRNOT00000058701	7554.6	218.883	1.273268e+002	1.828379e+001	233	43	9.212863e+000	0	0	0	0	0	0	120.361	1	1	43.3362	42.6552
DATA	459	6	34	0	0	A_64_P093462	NM_001108129	7580.25	218.627	2.198658e+004	2.198697e+003	20427	41	8.097942e+000	0	0	0	0	0	0	20862.5	1	1	46.1809	41.08
DATA	460	6	35	0	0	A_42_P799306	ENSRNOT00000015782	7605.66	218.473	1.786011e+002	2.210523e+001	274	38.5	6.310431e+000	0	0	0	0	0	0	170.078	1	1	48.8603	38.6923
DATA	461	6	36	0	0	A_42_P726743	NM_001108985	7630.8	218.761	1.453519e+003	1.459304e+002	1468.5	42	9.231224e+000	0	0	0	0	0	0	1388.89	1	1	46.8651	42.0263
DATA	462	6	37	0	0	A_44_P228341	NM_001025701	7656.67	218.443	7.371102e+003	7.372238e+002	7148	42	9.863078e+000	0	0	0	0	0	0	7066.52	1	1	47.5395	44.0303
DATA	463	6	38	0	0	A_42_P571433	NM_031059	7682	218.5	5.259221e+003	5.260802e+002	5024.5	43	9.519705e+000	0	0	0	0	0	0	5057.4	1	1	48.5334	44.2647
DATA	464	6	39	0	0	A_44_P132783	NM_214833	7707.33	218.5	1.997223e+002	2.375517e+001	296	45	9.179187e+000	0	0	0	0	0	0	192.614	1	1	57.5363	45.4667
DATA	465	6	40	0	0	A_44_P119215	NM_001108941	7732.5	218.5	2.237385e+002	2.578989e+001	321.5	40	9.580486e+000	0	0	0	0	0	0	216.357	1	1	57.5363	40
DATA	466	6	41	0	0	A_44_P124259	XM_345871	7757.89	218.5	9.671101e+001	1.603826e+001	201	41	1.301764e+001	0	0	0	0	0	0	93.7582	1	1	56.9804	42.8
DATA	467	6	42	0	0	A_44_P422063	NM_001107631	7783.69	218.732	7.320411e+002	7.430848e+001	796	45.5	9.563150e+000	0	0	0	0	0	0	711.403	1	1	47.8731	46.4231
DATA	468	6	43	0	0	A_44_P1033023	NM_013063	7808.7	218.9	1.516609e+004	1.516662e+003	14481	44	1.163632e+001	0	0	0	0	0	0	14770.3	1	1	47.2035	43.7586
DATA	469	6	44	0	0	A_64_P121618	NM_001134542	7834.48	218.984	6.292861e+002	6.419938e+001	706.5	39.5	9.971454e+000	0	0	0	0	0	0	614.108	1	1	43.7019	39.1333
DATA	470	6	45	0	0	A_64_P042188	ENSRNOT00000034890	7859.76	218.619	1.137553e+004	1.137624e+003	11294	38.5	9.318055e+000	0	0	0	0	0	0	11120.9	1	1	44.7812	40.1154
DATA	471	6	46	0	0	A_42_P561616	AI234869	7885.06	218.389	2.506200e+003	2.509400e+002	2498.5	45	9.170061e+000	0	0	0	0	0	0	2454.05	1	1	48.2044	44.9706
DATA	472	6	47	0	0	A_42_P588606	NM_001134544	7910.36	218.814	4.249895e+002	4.434131e+001	517	46	1.064461e+001	0	0	0	0	0	0	416.756	1	1	47.5395	44
DATA	473	6	48	0	0	A_42_P568897	NM_001005563	7935.68	218.459	1.355277e+003	1.361152e+002	1425.5	42	8.096828e+000	0	0	0	0	0	0	1330.67	1	1	51.7088	41.4
DATA	474	6	49	0	0	A_64_P096356	NM_012640	7961.12	218.582	2.557052e+004	2.557083e+003	25989	48	1.012088e+001	0	0	0	0	0	0	25133.5	1	1	46.1809	47.9677
DATA	475	6	50	0	0	A_64_P006418	A_64_P006418	7986.39	218.627	4.663241e+003	4.664945e+002	4960.5	45	1.303586e+001	0	0	0	0	0	0	4587.64	1	1	48.8603	46.6061
DATA	476	6	51	0	0	A_64_P156389	A_64_P156389	8011.63	218.596	5.336309e+002	5.483027e+001	548	40.5	7.267314e+000	0	0	0	0	0	0	525.351	1	1	57.8122	39.5769
DATA	477	6	52	0	0	A_42_P576446	NM_001107673	8037.63	219	2.048980e+004	2.049019e+003	19762	43	9.120161e+000	0	0	0	0	0	0	20183.2	1	1	48.5334	43.0345
DATA	478	6	53	0	0	A_64_P022804	A_64_P022804	8062.8	218.761	2.061979e+003	2.065818e+002	2118	41.5	8.615996e+000	0	0	0	0	0	0	2031.79	1	1	46.8651	40.3462
DATA	479	6	54	0	0	A_64_P162356	A_64_P162356	8088.21	219.121	3.947076e+004	3.947096e+003	39172.5	41	1.041665e+001	0	0	0	0	0	0	38900.1	1	1	43.3362	42.44
DATA	480	6	55	0	0	A_44_P266776	NM_199388	8113.57	218.761	3.795902e+003	3.797988e+002	3776	39	1.040637e+001	0	0	0	0	0	0	3740.88	1	1	46.5243	40.2609
DATA	481	6	56	0	0	A_64_P035066	NM_001008960	8138.5	219	1.263757e+001	1.259584e+001	109.5	42	9.822670e+000	0	0	0	0	0	0	4.26918	0	0	54.1152	44
DATA	482	6	57	0	0	A_64_P072728	NM_001100667	8164.5	219	9.909744e+003	9.910544e+002	9782	42	9.181679e+000	0	0	0	0	0	0	9760.64	1	1	48.5334	42.6452
DATA	483	6	58	0	0	A_64_P028446	NM_001106007	8190	219	4.657595e+003	4.659299e+002	4673	40	6.674986e+000	0	0	0	0	0	0	4584.97	1	1	46.8651	40.3438
DATA	484	6	59	0	0	A_44_P251212	NM_031715	8215.12	219	5.533073e+004	5.533087e+003	53639	44	1.127520e+001	0	0	0	0	0	0	54428.8	1	1	49.8279	43.8889
DATA	485	6	60	0	0	A_42_P818240	NM_001108334	8240.59	219.092	2.348130e+004	2.348164e+003	22752.5	43	1.366004e+001	0	0	0	0	0	0	23077.8	1	1	49.1849	46.8214
DATA	486	6	61	0	0	A_64_P023122	NM_001080208	8265.62	218.892	1.268342e+001	1.265223e+001	109.5	42	9.971260e+000	0	0	0	0	0	0	6.6556	0	0	48.5334	41.7059
DATA	487	6	62	0	0	A_44_P217821	NM_001107292	8291.44	219.027	1.439778e+003	1.445325e+002	1499	44	9.378098e+000	0	0	0	0	0	0	1411.76	1	1	48.5334	42.2222
DATA	488	6	63	0	0	A_64_P007372	NM_001105895	8316.5	219	1.611729e+001	1.276968e+001	119.5	41	9.329003e+000	0	0	0	0	0	0	15.7816	1	0	54.1152	42.303
DATA	489	6	64	0	0	A_42_P792382	NM_017257	8342	218.774	1.428750e+004	1.428807e+003	14046.5	40.5	9.013991e+000	0	0	0	0	0	0	13967.6	1	1	45.4864	38.6667
DATA	490	6	65	0	0	A_43_P12232	NM_022512	8367.61	219.014	1.895956e+003	1.900212e+002	1864	36.5	6.476964e+000	0	0	0	0	0	0	1850.29	1	1	47.5395	36.6071
DATA	491	6	66	0	0	A_64_P158475	A_64_P158475	8392.7	219.1	4.746730e+003	4.748438e+002	4713.5	42	1.483862e+001	0	0	0	0	0	0	4623.73	1	1	47.2035	44.5517
DATA	492	6	67	0	0	A_64_P043361	NM_001197023	8418.37	219.404	2.630444e+002	2.923594e+001	357	45.5	9.698679e+000	0	0	0	0	0	0	255.701	1	1	57.8122	43.7333
DATA	493	6	68	0	0	A_64_P080851	NM_001105753	8443.46	219.118	1.078725e+002	1.673021e+001	213	40	9.028008e+000	0	0	0	0	0	0	104.63	1	1	49.8279	39.8276
DATA	494	6	69	0	0	A_44_P129330	NM_001107505	8469.17	218.677	3.042209e+003	3.044909e+002	3019.5	41	1.069627e+001	0	0	0	0	0	0	2943.63	1	1	45.4864	42
DATA	495	6	70	0	0	A_64_P008827	NM_001014012	8494.65	218.862	6.913472e+003	6.914666e+002	6500	44	6.143414e+000	0	0	0	0	0	0	6672.68	1	1	45.4864	44.3077
DATA	496	6	71	0	0	A_64_P026222	NM_001101019	8519.68	218.8	9.768311e+001	1.616928e+001	205	44	1.094217e+001	0	0	0	0	0	0	94.0337	1	1	45.4864	42.2581
DATA	497	6	72	0	0	A_64_P067749	NM_012659	8545.29	218.881	2.843692e+004	2.843722e+003	27714	37	8.536794e+000	0	0	0	0	0	0	27297.5	1	1	43.7019	37.6552
DATA	498	6	73	0	0	A_44_P362981	NM_145878	8570.65	219.222	4.395151e+004	4.395170e+003	41236	41.5	9.897624e+000	0	0	0	0	0	0	42067.7	1	1	47.5395	43.5
DATA	499	6	74	0	0	A_64_P146654	NM_031698	8596.15	219.413	8.721355e+003	8.722323e+002	8338	39	6.392345e+000	0	0	0	0	0	0	8321.94	1	1	48.8603	38.8276
DATA	500	6	75	0	0	A_42_P548800	NM_001007696	8621.63	219.37	8.814603e+003	8.815567e+002	8350	39.5	9.937729e+000	0	0	0	0	0	0	8383.88	1	1	48.2044	39.0385
DATA	501	6	76	0	0	A_44_P310581	BG673348	8646.75	219.356	3.018241e+003	3.021076e+002	2910.5	38	9.328460e+000	0	0	0	0	0	0	2861.31	1	1	48.5334	39.2571
DATA	502	6	77	0	0	A_64_P062269	XM_001067531	8672.11	219.5	1.698819e+002	2.147023e+001	271.5	39	7.653712e+000	0	0	0	0	0	0	160.497	1	1	56.9804	40.8
DATA	503	6	78	66	1	DarkCorner	DarkCorner	8697.58	219.514	1.322763e+001	1.317614e+001	84	37	7.957027e+000	0	0	0	0	0	0	-27.1821	0	0	49.1849	36.4571
DATA	504	6	79	66	1	DarkCorner	DarkCorner	8723.13	219.5	1.327677e+001	1.322509e+001	89	37	9.564720e+000	0	0	0	0	0	0	-20.8108	0	0	49.8279	39
DATA	505	6	80	66	1	DarkCorner	DarkCorner	8748.33	219.5	1.332684e+001	1.327498e+001	88	39.5	9.125498e+000	0	0	0	0	0	0	-24.9003	0	0	57.5363	39.9667
DATA	506	6	81	66	1	DarkCorner	DarkCorner	8773.59	219.382	1.337873e+001	1.332666e+001	86	37	9.413699e+000	0	0	0	0	0	0	-26.0878	0	0	46.8651	38.8929
DATA	507	6	82	66	1	DarkCorner	DarkCorner	8799.48	219.373	1.343337e+001	1.338109e+001	83	40	7.656391e+000	0	0	0	0	0	0	-28.2277	0	0	49.8279	38.5294
DATA	508	6	83	66	1	DarkCorner	DarkCorner	8824.74	219.588	1.348786e+001	1.343537e+001	82	43	1.039285e+001	0	0	0	0	0	0	-30.3414	0	0	50.7771	41.6296
DATA	509	6	84	66	1	DarkCorner	DarkCorner	8850.01	219.686	1.354394e+001	1.349123e+001	89	38	9.794516e+000	0	0	0	0	0	0	-22.574	0	0	46.5243	39.3056
DATA	510	6	85	66	1	DarkCorner	DarkCorner	8875.26	219.208	1.360212e+001	1.354918e+001	97	35	8.972985e+000	0	0	0	0	0	0	-16.4777	0	0	49.5074	35.2698
DATA	511	7	1	66	1	DarkCorner	DarkCorner	6729.43	224.914	1.597501e+001	1.591283e+001	100	39	9.368940e+000	0	0	0	0	0	0	-10.5197	0	0	47.8731	38.8011
DATA	512	7	2	66	1	DarkCorner	DarkCorner	6755	225	1.585873e+001	1.579701e+001	93	41	8.938915e+000	0	0	0	0	0	0	-15.3326	0	0	54.9904	42.9143
DATA	513	7	3	66	1	DarkCorner	DarkCorner	6780.3	225.23	1.574449e+001	1.568321e+001	89	42	9.363529e+000	0	0	0	0	0	0	-20.1193	0	0	48.2044	42.1351
DATA	514	7	4	66	1	DarkCorner	DarkCorner	6805.5	225	1.563329e+001	1.557244e+001	93	40	9.525086e+000	0	0	0	0	0	0	-14.3333	0	0	54.1152	41
DATA	515	7	5	66	1	DarkCorner	DarkCorner	6831.06	224.906	1.552150e+001	1.546108e+001	92	39.5	9.678632e+000	0	0	0	0	0	0	-17.1084	0	0	41.0736	41.25
DATA	516	7	6	66	1	DarkCorner	DarkCorner	6856.14	225.26	1.541199e+001	1.535200e+001	94	44.5	1.240216e+001	0	0	0	0	0	0	-17.2878	0	0	49.5074	45.9643
DATA	517	7	7	66	1	DarkCorner	DarkCorner	6881.73	225.32	1.530266e+001	1.524310e+001	87.5	41	9.059736e+000	0	0	0	0	0	0	-19.1704	0	0	49.1849	42.3103
DATA	518	7	8	66	1	DarkCorner	DarkCorner	6907.42	225.427	1.519448e+001	1.513534e+001	91	43	9.761676e+000	0	0	0	0	0	0	-18.7278	0	0	57.5363	42.9032
DATA	519	7	9	0	0	A_64_P051297	NM_001107416	6932.5	225.5	7.226691e+003	7.228255e+002	6018	44	1.057386e+001	0	0	0	0	0	0	5963.19	1	1	49.1849	43.25
DATA	520	7	10	0	0	A_64_P162378	A_64_P162378	6958.14	225.407	7.599989e+004	7.600004e+003	64274	46	1.258087e+001	0	0	0	0	0	0	63147.6	1	1	56.9804	48.1818
DATA	521	7	11	0	0	A_64_P030634	ENSRNOT00000042606	6983.5	225.352	2.191598e+002	2.646060e+001	287.5	47	1.371883e+001	0	0	0	0	0	0	183.335	1	1	57.5363	46.7222
DATA	522	7	12	0	0	A_64_P110009	NM_024392	7008.83	225.505	1.773690e+004	1.773751e+003	14872	44	9.321634e+000	0	0	0	0	0	0	14937.6	1	1	54.1152	43.3214
DATA	523	7	13	0	0	A_42_P618145	NM_001080783	7034.26	225.264	1.115743e+004	1.115839e+003	9388	45	8.790146e+000	0	0	0	0	0	0	9458.77	1	1	47.5395	45
DATA	525	7	15	0	0	A_64_P101770	NM_001000074	7085.11	225.5	2.189577e+001	1.460694e+001	123.5	46.5	1.267814e+001	0	0	0	0	0	0	18.8056	1	0	56.9804	49.8529
DATA	526	7	16	0	0	A_42_P735934	NM_001105729	7110.3	225.493	4.958168e+003	4.960245e+002	4548	46	9.647775e+000	0	0	0	0	0	0	4285.29	1	1	46.8651	43.7097
DATA	528	7	18	0	0	A_42_P718331	NM_133522	7161.42	225.427	1.503692e+003	1.510358e+002	1434	48	1.067355e+001	0	0	0	0	0	0	1315.88	1	1	57.5363	46.4839
DATA	529	7	19	0	0	A_64_P118054	NM_001037651	7186.58	225.427	1.065114e+002	1.766276e+001	202.5	51	1.207441e+001	0	0	0	0	0	0	93.7645	1	1	57.5363	48.4839
DATA	530	7	20	0	0	A_64_P044613	A_64_P044613	7212.11	225.5	7.698097e+004	7.698110e+003	69492	51	1.156916e+001	0	0	0	0	0	0	68171.1	1	1	56.9804	48.9143
DATA	531	7	21	0	0	A_43_P13241	NM_134334	7237.44	225.521	2.766060e+004	2.766095e+003	23940	50	1.109721e+001	0	0	0	0	0	0	24636.4	1	1	48.2044	50.9259
DATA	532	7	22	0	0	A_44_P524748	NM_001000712	7262.67	225.5	1.390268e+001	1.389237e+001	114.5	48	1.436196e+001	0	0	0	0	0	0	9.87266	0	0	57.5363	47.8621
DATA	533	7	23	0	0	A_64_P126797	ENSRNOT00000048363	7288.28	225.707	1.439956e+002	1.992495e+001	240	40	1.292682e+001	0	0	0	0	0	0	129.693	1	1	49.1849	42.5556
DATA	535	7	25	0	0	A_42_P730411	NM_001012181	7339.26	225.778	3.924598e+003	3.926962e+002	3558.5	41	7.133519e+000	0	0	0	0	0	0	3572.61	1	1	47.5395	40.875
DATA	536	7	26	0	0	A_64_P049501	NM_001047970	7364.02	225.778	8.371256e+001	1.593446e+001	186	40	1.088234e+001	0	0	0	0	0	0	76.5835	1	1	50.1463	42.4444
DATA	537	7	27	0	0	A_42_P623688	NM_031031	7389.86	225.716	2.480081e+004	2.480118e+003	22408	42	8.561472e+000	0	0	0	1	0	0	22802.9	1	1	48.5334	41.9189
DATA	538	7	28	0	0	A_42_P601217	NM_053460	7415.38	225.763	7.720265e+002	7.836133e+001	803	39	8.325263e+000	0	0	0	0	0	0	713.262	1	1	49.1849	37.68
DATA	540	7	30	0	0	A_42_P791872	NM_001135174	7466	225.729	2.024883e+004	2.024927e+003	18249	43	1.152135e+001	0	0	0	0	0	0	18878.2	1	1	46.8651	44.4706
DATA	542	7	32	0	0	A_44_P557172	NM_177936	7516.48	225.853	1.195263e+002	1.780179e+001	221.5	41	8.612468e+000	0	0	0	0	0	0	112.381	1	1	49.8279	41.7857
DATA	543	7	33	0	0	A_64_P118812	NM_001000512	7542.42	225.573	1.319025e+001	1.313891e+001	101	45	9.618307e+000	0	0	0	0	0	0	-3.43229	0	0	57.5363	43.6129
DATA	544	7	34	0	0	A_64_P019425	NM_172035	7567.5	225.648	4.512818e+002	4.698809e+001	528	41.5	1.271365e+001	0	0	0	0	0	0	427.648	1	1	57.5363	43.8667
DATA	545	7	35	0	0	A_42_P726743	NM_001108985	7592.91	225.614	1.378037e+003	1.384195e+002	1405.5	39.5	7.438931e+000	0	0	0	0	0	0	1310.66	1	1	57.259	40.7813
DATA	546	7	36	0	0	A_42_P558703	NM_001106810	7618.26	226.222	2.893871e+003	2.896788e+002	2789.5	40.5	5.826976e+000	0	0	0	0	0	0	2762.13	1	1	47.2035	41.4706
DATA	547	7	37	0	0	A_42_P619806	TC590118	7643.85	225.836	5.158644e+002	5.318762e+001	600	44	9.832074e+000	0	0	0	0	0	0	494.015	1	1	47.5395	44.3243
DATA	548	7	38	0	0	A_64_P072247	XM_001055615	7669.09	225.614	7.085505e+001	1.472840e+001	174	48	1.037452e+001	0	0	0	0	0	0	68.0655	1	1	65	46.6216
DATA	549	7	39	0	0	A_64_P104164	A_64_P104164	7694.43	226.239	3.401444e+004	3.401468e+003	33838	44	9.591762e+000	0	0	0	0	0	0	32773.8	1	1	46.5243	44.2424
DATA	550	7	40	0	0	A_42_P672103	NM_021770	7719.94	226	4.295886e+004	4.295905e+003	41393	44.5	1.051791e+001	0	0	0	0	0	0	41507.6	1	1	46.8651	43.8333
DATA	551	7	41	0	0	A_64_P090942	NM_001000406	7745.28	226.118	1.893865e+001	1.294312e+001	126	38.5	1.119836e+001	0	0	0	0	0	0	18.3468	1	0	48.8603	40.125
DATA	552	7	42	0	0	A_64_P149491	ENSRNOT00000025458	7770.63	226.043	2.159379e+002	2.508855e+001	311	42	9.921663e+000	0	0	0	0	0	0	209.699	1	1	46.8651	44.5
DATA	553	7	43	0	0	A_42_P552441	NR_002704	7795.82	226	3.582269e+004	3.582291e+003	34168	44.5	1.300058e+001	0	0	0	0	0	0	34865.5	1	1	51.4001	46.7813
DATA	554	7	44	0	0	A_64_P060419	ENSRNOT00000055060	7821.26	226.013	1.276740e+001	1.277655e+001	117	43	1.398127e+001	0	0	0	0	0	0	11.9451	0	0	49.1849	45.8
DATA	555	7	45	0	0	A_44_P161233	NM_019165	7847	226	3.869373e+003	3.871455e+002	3867	37.5	1.000761e+001	0	0	0	0	0	0	3781.09	1	1	46.8651	38.0938
DATA	556	7	46	66	-1	(-)3xSLv1	NegativeControl	7871.89	226.055	1.272151e+001	1.267200e+001	96	44	8.322114e+000	0	0	0	0	0	0	-9.10966	0	0	46.8651	44.8485
DATA	557	7	47	0	0	A_43_P12519	NM_031114	7897.76	226	2.213550e+004	2.213586e+003	21259	44	1.026975e+001	0	0	0	0	0	0	21700.6	1	1	46.8651	43.875
DATA	558	7	48	0	0	A_44_P317600	NM_012612	7923	226	2.882535e+002	3.147307e+001	392	43	9.982127e+000	0	0	0	0	0	0	282.968	1	1	46.8651	42
DATA	559	7	49	0	0	A_64_P034166	A_64_P034166	7948.5	226.352	2.906130e+001	1.295067e+001	135	43	9.977191e+000	0	0	0	0	0	0	28.5623	1	0	57.5363	42.5172
DATA	560	7	50	0	0	A_64_P024585	NM_001109337	7973.58	226.427	2.262280e+001	1.280948e+001	125	44	8.037814e+000	0	0	0	0	0	0	22.256	1	0	57.5363	45.1613
DATA	561	7	51	0	0	A_42_P654682	NM_012724	7999.32	226.291	2.430950e+003	2.434212e+002	2491.5	40	7.438638e+000	0	0	0	0	0	0	2393.46	1	1	50.7771	38.5556
DATA	562	7	52	0	0	A_42_P524610	NM_001108992	8024.78	226.176	5.135506e+003	5.137049e+002	5063	40.5	9.012851e+000	0	0	0	0	0	0	5059.38	1	1	48.2044	40.75
DATA	563	7	53	0	0	A_64_P046677	NM_020093	8049.91	226.386	6.691492e+001	1.425319e+001	174	42	1.033722e+001	0	0	0	0	0	0	65.952	1	1	57.259	43.4839
DATA	564	7	54	0	0	A_64_P042742	XM_001061779	8075.26	225.769	5.656934e+002	5.795168e+001	670.5	41	9.302391e+000	0	0	0	0	0	0	557.676	1	1	45.1352	39.9655
DATA	565	7	55	0	0	A_64_P058430	ENSRNOT00000062073	8100.36	225.87	3.174671e+001	1.297540e+001	140	41	8.120854e+000	0	0	0	0	0	0	31.2993	1	0	46.8651	40.3448
DATA	566	7	56	0	0	A_42_P479251	NM_001108686	8126.3	226.1	1.340483e+004	1.340542e+003	13109.5	42	1.010461e+001	0	0	0	0	0	0	13214.6	1	1	47.2035	42.6452
DATA	567	7	57	0	0	A_42_P777329	NM_001106943	8151.82	226.271	1.730350e+003	1.734921e+002	1786	42.5	9.138220e+000	0	0	0	0	0	0	1705.32	1	1	51.7088	42.9063
DATA	568	7	58	0	0	A_64_P103414	NM_001106472	8176.89	226.5	4.163328e+001	1.326179e+001	145	42	6.417513e+000	0	0	0	0	0	0	41.0129	1	0	65	43.0938
DATA	569	7	59	0	0	A_64_P082164	A_64_P082164	8202.42	226.427	1.875282e+002	2.259235e+001	283	41.5	8.811420e+000	0	0	0	0	0	0	184.615	1	1	57.5363	41.6875
DATA	570	7	60	0	0	A_42_P702729	NM_001107557	8227.94	226.611	3.975198e+003	3.977197e+002	3988	44	1.470995e+001	0	0	0	0	0	0	3910.29	1	1	48.2044	46.4848
DATA	571	7	61	0	0	A_64_P130922	A_64_P130922	8253.11	226.5	6.011961e+002	6.143030e+001	697.5	41	1.166385e+001	0	0	0	0	0	0	590.8	1	1	56.9804	41.8857
DATA	572	7	62	0	0	A_42_P509843	NM_001100480	8278.68	226.397	1.883467e+003	1.887701e+002	1955	37	1.028498e+001	0	0	0	0	0	0	1848.74	1	1	46.8651	39.931
DATA	573	7	63	0	0	A_64_P110759	A_64_P110759	8303.67	226.5	5.603273e+001	1.383823e+001	162	42	6.338729e+000	0	0	0	0	0	0	54.9285	1	0	65	40.8889
DATA	574	7	64	0	0	A_64_P006235	A_64_P006235	8329.25	226.356	6.202107e+002	6.330241e+001	712	41	8.025560e+000	0	0	0	0	0	0	607.074	1	1	48.5334	40.525
DATA	575	7	65	0	0	A_44_P506064	NM_001191778	8354.71	226.547	3.397698e+002	3.627046e+001	435	38	9.517561e+000	0	0	0	0	0	0	332.027	1	1	49.1849	38.925
DATA	576	7	66	0	0	A_64_P075425	A_64_P075425	8380.14	226.5	1.831433e+004	1.831477e+003	17412.5	42	1.672763e+001	0	0	0	0	0	0	17864.5	1	1	47.8731	45.8438
DATA	577	7	67	0	0	A_42_P544898	NM_001108279	8405.63	226.64	2.502372e+002	2.808063e+001	341.5	43	1.503268e+001	0	0	0	0	0	0	243.611	1	1	48.8603	43.8667
DATA	578	7	68	0	0	A_44_P837192	ENSRNOT00000038251	8430.67	226.5	1.281780e+001	1.282399e+001	115	42	8.123387e+000	0	0	0	0	0	0	11.638	0	0	57.5363	41.7143
DATA	580	7	70	0	0	A_44_P325657	NM_001014007	8481.71	226.569	2.143938e+002	2.498427e+001	318.5	39	7.791182e+000	0	0	0	0	0	0	207.297	1	1	48.5334	40.6571
DATA	581	7	71	0	0	A_64_P004598	ENSRNOT00000024034	8507	226.545	5.722596e+002	5.865341e+001	656	43	1.071013e+001	0	0	0	0	0	0	551.9	1	1	55.8519	42.2759
DATA	582	7	72	0	0	A_42_P607183	XM_001081723	8532.56	226.483	3.577266e+003	3.579590e+002	3522.5	34	8.469553e+000	0	0	0	0	0	0	3440.56	1	1	52.9257	36
DATA	584	7	74	0	0	A_42_P589190	NM_023104	8583.44	226.521	2.611265e+003	2.614485e+002	2545	42	1.120268e+001	0	0	0	0	0	0	2496.81	1	1	48.2044	42
DATA	585	7	75	0	0	A_42_P757323	TC587630	8608.69	226.662	5.197547e+003	5.199176e+002	5004.5	41	1.070024e+001	0	0	0	0	0	0	4954.38	1	1	48.5334	41.069
DATA	586	7	76	0	0	A_42_P688320	NM_001108569	8634.07	226.732	6.555118e+002	6.683850e+001	724	35	1.064615e+001	0	0	0	0	0	0	622.82	1	1	47.5395	37.4118
DATA	587	7	77	0	0	A_44_P224705	NM_031002	8659.82	226.784	2.407792e+002	2.741063e+001	338	41	9.911063e+000	0	0	0	0	0	0	227.99	1	1	48.2044	43.3333
DATA	588	7	78	0	0	A_42_P481849	NM_001100563	8684.96	226.792	3.841326e+003	3.843575e+002	3669	40	7.169311e+000	0	0	0	0	0	0	3624.74	1	1	46.8651	40.4483
DATA	589	7	79	66	1	DarkCorner	DarkCorner	8709.82	226.946	1.324273e+001	1.319119e+001	88	37	7.304054e+000	0	0	0	0	0	0	-20.5109	0	0	47.8731	37.6429
DATA	590	7	80	66	1	DarkCorner	DarkCorner	8735.63	226.773	1.329303e+001	1.324129e+001	87	41	9.396751e+000	0	0	0	0	0	0	-23.699	0	0	49.1849	40.9677
DATA	591	7	81	66	1	DarkCorner	DarkCorner	8760.89	227.083	1.334331e+001	1.329138e+001	83	38	9.664701e+000	0	0	0	0	0	0	-26.3094	0	0	51.4001	40.1613
DATA	592	7	82	66	1	DarkCorner	DarkCorner	8786.32	226.692	1.339630e+001	1.334416e+001	88	39.5	7.112007e+000	0	0	0	0	0	0	-24.5509	0	0	50.4627	38.75
DATA	593	7	83	66	1	DarkCorner	DarkCorner	8811.86	227.129	1.344999e+001	1.339764e+001	83	41	5.904618e+000	0	0	0	0	0	0	-26.384	0	0	46.8651	40.2581
DATA	594	7	84	66	1	DarkCorner	DarkCorner	8836.5	227.092	1.350375e+001	1.345119e+001	84	40.5	1.134001e+001	0	0	0	0	0	0	-27.276	0	0	49.1849	40.2813
DATA	595	7	85	66	1	DarkCorner	DarkCorner	8862.93	226.699	1.356335e+001	1.351056e+001	87.5	36	9.419964e+000	0	0	0	0	0	0	-25.8733	0	0	47.8731	37.0909
DATA	596	8	1	66	1	DarkCorner	DarkCorner	6741.9	232.803	1.589405e+001	1.583219e+001	96	40	8.985891e+000	0	0	0	0	0	0	-14.3674	0	0	46.8651	40.3654
DATA	597	8	2	66	1	DarkCorner	DarkCorner	6767.39	233.014	1.577909e+001	1.571767e+001	92	41	6.943651e+000	0	0	0	0	0	0	-17.3165	0	0	49.1849	40
DATA	598	8	3	66	1	DarkCorner	DarkCorner	6793.11	232.5	1.566649e+001	1.560552e+001	90	41	1.067073e+001	0	0	0	0	0	0	-18.3602	0	0	56.9804	42.7419
DATA	599	8	4	66	1	DarkCorner	DarkCorner	6818.2	232.773	1.555568e+001	1.549513e+001	91	40	1.164436e+001	0	0	0	0	0	0	-17.3095	0	0	48.8603	43.6552
DATA	600	8	5	66	1	DarkCorner	DarkCorner	6843.79	232.487	1.544563e+001	1.538552e+001	91	45	1.049115e+001	0	0	0	0	0	0	-18.2439	0	0	49.8279	45.7647
DATA	601	8	6	66	1	DarkCorner	DarkCorner	6869.07	232.535	1.533753e+001	1.527784e+001	91.5	40	6.995670e+000	0	0	0	0	0	0	-17.0382	0	0	47.8731	41.4242
DATA	602	8	7	66	1	DarkCorner	DarkCorner	6894.75	232.849	1.522860e+001	1.516933e+001	96	44	1.008440e+001	0	0	0	0	0	0	-11.2695	0	0	47.8731	43.8485
DATA	603	8	8	0	0	A_44_P487081	NM_001033951	6920.11	232.5	1.413796e+003	1.421801e+002	1266	43	1.350425e+001	0	0	0	0	0	0	1164	1	1	56.9804	45.4
DATA	604	8	9	0	0	A_64_P054403	NM_001170340	6945.5	232.5	3.024770e+002	3.374604e+001	355	43	8.972621e+000	0	0	0	0	0	0	250.752	1	1	65	43.2857
DATA	605	8	10	0	0	A_44_P665685	NM_001109325	6970.67	232.5	3.059431e+001	1.517348e+001	136.5	44.5	1.418986e+001	0	0	0	0	0	0	25.534	1	0	65	47.2647
DATA	606	8	11	0	0	A_42_P531684	NM_001014215	6996.33	232.5	8.501161e+002	8.628364e+001	813	43	1.155646e+001	0	0	0	1	0	0	714.347	1	1	57.5363	42.1379
DATA	607	8	12	0	0	A_42_P722904	ENSRNOT00000006525	7021.63	233.265	5.864243e+003	5.866076e+002	4920	43	9.541781e+000	0	0	0	0	0	0	4960.96	1	1	46.5243	43.2593
DATA	608	8	13	0	0	A_42_P514057	NM_031839	7047	232.545	3.867684e+001	1.507269e+001	144.5	42	1.014017e+001	0	0	0	0	0	0	32.9308	1	0	55.8519	43.0667
DATA	609	8	14	0	0	A_64_P087459	A_64_P087459	7072.2	232.744	1.099611e+005	1.099612e+004	96192	45	1.546263e+001	0	0	0	0	0	0	94229.6	1	1	51.0895	50.303
DATA	610	8	15	0	0	A_42_P581060	NM_001108722	7097.77	232.884	1.861614e+004	1.861669e+003	15864.5	45.5	6.958006e+000	0	0	0	0	0	0	16055.7	1	1	46.5243	44.4231
DATA	611	8	16	0	0	A_42_P658220	NM_001109598	7123.14	233.085	4.550267e+003	4.552511e+002	3981	41.5	1.017420e+001	0	0	0	0	0	0	3949.16	1	1	44.0646	42.5
DATA	612	8	17	0	0	A_42_P758454	NM_001108101	7148.5	232.769	8.529351e+002	8.646824e+001	824	42	9.274537e+000	0	0	0	0	0	0	744.791	1	1	49.8279	42.2727
DATA	613	8	18	0	0	A_64_P140956	NM_001013141	7173.82	232.699	5.477860e+002	5.656904e+001	586.5	46	1.012211e+001	0	0	0	0	0	0	481.218	1	1	51.0895	46.1143
DATA	614	8	19	0	0	A_42_P508984	NM_001007729	7199.42	232.573	3.161022e+003	3.164137e+002	2896	49	1.047405e+001	0	0	0	0	0	0	2793.48	1	1	57.5363	46.6875
DATA	615	8	20	0	0	A_42_P619008	NM_001013079	7224.7	233.254	8.354968e+003	8.356133e+002	7577.5	53.5	1.219740e+001	0	0	0	0	0	0	7426.89	1	1	45.835	52.4643
DATA	616	8	21	0	0	A_64_P058351	NM_017101	7250.17	232.778	1.023521e+005	1.023522e+004	91718.5	49	1.081973e+001	0	0	0	0	0	0	91497.2	1	1	50.4627	48.931
DATA	617	8	22	0	0	A_64_P083800	XM_001058776	7275.41	233.014	5.240142e+001	1.476009e+001	154	52	1.409573e+001	0	0	0	0	0	0	47.1042	1	0	47.8731	50.2414
DATA	618	8	23	0	0	A_64_P028088	NM_001106073	7300.79	233.093	2.259646e+003	2.263810e+002	2126	40	1.445828e+001	0	0	0	0	0	0	2042.26	1	1	48.2044	43.5517
DATA	619	8	24	0	0	A_44_P105441	ENSRNOT00000042202	7326.3	233.333	3.923688e+004	3.923712e+003	35633.5	39.5	1.162805e+001	0	0	0	0	0	0	35651.6	1	1	44.4243	41.2143
DATA	620	8	25	0	0	A_42_P675802	NM_145777	7351.73	233.357	8.403117e+003	8.404215e+002	7529.5	40.5	7.919569e+000	0	0	0	0	0	0	7674.65	1	1	46.8651	42.1429
DATA	621	8	26	0	0	A_64_P018525	ENSRNOT00000027134	7377.09	232.935	7.929318e+002	8.043656e+001	831.5	41	1.026918e+001	0	0	0	0	0	0	727.781	1	1	54.4085	40.4878
DATA	622	8	27	0	0	A_42_P749382	NM_001106731	7402.63	233.206	2.141456e+004	2.141499e+003	19375	42	7.053164e+000	0	0	0	0	0	0	19751.5	1	1	46.8651	40.3333
DATA	623	8	28	0	0	A_44_P316364	NM_001077675	7427.46	233.141	5.140781e+001	1.433973e+001	157	39.5	9.540779e+000	0	0	0	0	0	0	47.6334	1	0	47.8731	37.2857
DATA	624	8	29	0	0	A_64_P143596	ENSRNOT00000060139	7453.54	232.973	1.087626e+002	1.719987e+001	212.5	39	9.200832e+000	0	0	0	0	0	0	101.247	1	1	48.5334	39.303
DATA	625	8	30	0	0	A_42_P468723	NM_001191689	7478.75	233	1.747204e+003	1.752233e+002	1744	42	1.108380e+001	0	0	0	0	0	0	1633.56	1	1	49.1849	43.9643
DATA	626	8	31	0	0	A_42_P533792	NM_001106575	7504.16	233.103	2.904717e+004	2.904747e+003	26667.5	43	8.629074e+000	0	0	0	0	0	0	27273.1	1	1	46.5243	42.5667
DATA	627	8	32	0	0	A_43_P16773	XM_217313	7529.37	233	1.367586e+003	1.373901e+002	1395	41	8.448020e+000	0	0	0	0	0	0	1289.24	1	1	50.4627	41.5357
DATA	628	8	33	0	0	A_42_P765830	NM_001106426	7554.8	233.216	3.297864e+004	3.297890e+003	30796	42.5	1.224507e+001	0	0	0	0	0	0	31211.4	1	1	47.8731	44.6429
DATA	629	8	34	0	0	A_43_P15073	ENSRNOT00000030771	7580.26	233.271	4.760789e+002	4.936596e+001	545	40	8.984216e+000	0	0	0	0	0	0	452.257	1	1	46.8651	39.129
DATA	630	8	35	0	0	A_42_P538527	NM_001108885	7605.56	233.451	2.359228e+002	2.694200e+001	326	42	1.017191e+001	0	0	0	0	0	0	224.918	1	1	47.8731	43.875
DATA	631	8	36	0	0	A_64_P037130	A_64_P037130	7630.91	233.386	1.301735e+001	1.296684e+001	102.5	42.5	9.105709e+000	0	0	0	0	0	0	0.602469	0	0	57.259	42.7105
DATA	632	8	37	0	0	A_44_P536115	NM_023957	7656.65	233.222	7.771778e+003	7.772852e+002	7519	48	1.096940e+001	0	0	0	0	0	0	7458.56	1	1	47.5395	47.2857
DATA	633	8	38	0	0	A_43_P11800	NM_017059	7682.03	233.092	7.415515e+002	7.526634e+001	817.5	41	1.020232e+001	0	0	0	0	0	0	713.827	1	1	46.5243	44.1714
DATA	634	8	39	0	0	A_64_P004922	NM_001191924	7707.46	233.386	6.140694e+003	6.142038e+002	5869.5	46.5	9.727612e+000	0	0	0	0	0	0	5928.23	1	1	47.5395	44.8333
DATA	635	8	40	0	0	A_64_P145058	NM_001107951	7732.69	233.181	1.013087e+003	1.021158e+002	1067	41	9.682844e+000	0	0	0	0	0	0	980.641	1	1	47.8731	41.9667
DATA	636	8	41	0	0	A_64_P075372	A_64_P075372	7758	233.455	3.849327e+001	1.334885e+001	142	38	9.174490e+000	0	0	0	0	0	0	37.3546	1	0	55.8519	39.0333
DATA	637	8	42	0	0	A_64_P118792	NM_001107034	7783.42	233.427	5.280033e+001	1.380188e+001	161	44	1.151222e+001	0	0	0	0	0	0	51.3583	1	0	57.5363	45.7419
DATA	638	8	43	0	0	A_42_P469685	NM_001100532	7808.87	233.623	8.337151e+003	8.338122e+002	8077.5	45	1.385272e+001	0	0	0	0	0	0	8127.09	1	1	46.8651	48.0909
DATA	639	8	44	0	0	A_42_P759822	NM_001109673	7834.31	233.514	1.728091e+003	1.732751e+002	1802	39	9.968898e+000	0	0	0	0	0	0	1687.87	1	1	47.8731	39.0741
DATA	640	8	45	0	0	A_64_P014687	NM_012650	7859.58	233.2	9.513435e+003	9.514279e+002	10171	42.5	9.325317e+000	0	0	0	0	0	0	9308.45	1	1	41.8414	43.1923
DATA	641	8	46	0	0	A_43_P18505	NM_001012010	7884.89	233.5	2.335445e+002	2.656336e+001	335	44	1.114801e+001	0	0	0	0	0	0	228.884	1	1	56.9804	45.8537
DATA	642	8	47	0	0	A_43_P12580	NM_031548	7910.42	233.427	2.128189e+002	2.475160e+001	319	44.5	9.474508e+000	0	0	0	0	0	0	208.871	1	1	57.5363	43.125
DATA	643	8	48	0	0	A_64_P052980	NM_001014786	7935.58	233.427	2.031961e+001	1.278504e+001	126.5	43	9.016373e+000	0	0	0	0	0	0	19.9674	1	0	65	42.5357
DATA	644	8	49	0	0	A_64_P397764	ENSRNOT00000028709	7961.11	233.5	1.744742e+003	1.749292e+002	1824	43.5	6.350038e+000	0	0	0	0	0	0	1716.34	1	1	56.9804	44.2333
DATA	645	8	50	0	0	A_64_P048408	NM_001008858	7986.56	233.479	5.372601e+002	5.518323e+001	647	42	9.065591e+000	0	0	0	0	0	0	528.982	1	1	48.2044	42.5806
DATA	647	8	52	0	0	A_64_P059500	ENSRNOT00000043917	8037.05	233.431	1.263169e+001	1.259129e+001	112	40	8.435547e+000	0	0	0	0	0	0	4.63102	0	0	44.7812	41.0385
DATA	648	8	53	0	0	A_64_P220198	AW917371	8062.44	233.466	1.895637e+001	1.272024e+001	124	40	1.104860e+001	0	0	0	0	0	0	18.6934	1	0	49.1849	41.1563
DATA	649	8	54	0	0	A_64_P109764	NM_001007756	8088.13	233.376	9.250349e+002	9.335447e+001	1014	38	8.082707e+000	0	0	0	0	0	0	912.347	1	1	52.0157	38.3889
DATA	650	8	55	0	0	A_64_P142685	NM_001130498	8113.5	233.5	3.319108e+001	1.300697e+001	136	39.5	7.479397e+000	0	0	0	0	0	0	32.7354	1	0	57.5363	38.7
DATA	651	8	56	0	0	A_44_P395709	NM_134366	8138.88	233.569	3.777107e+003	3.779201e+002	3854	47	1.105558e+001	0	0	0	0	0	0	3724.54	1	1	44.7812	46.3226
DATA	652	8	57	0	0	A_64_P165071	NM_001110165	8164.43	233.761	1.637637e+004	1.637685e+003	16230	42	6.056792e+000	0	0	0	0	0	0	16142.5	1	1	46.5243	42.5517
DATA	653	8	58	0	0	A_64_P009147	ENSRNOT00000042587	8189.59	233.667	1.227309e+002	1.758250e+001	229	40	8.562474e+000	0	0	0	0	0	0	120.912	1	1	47.2035	40.9143
DATA	654	8	59	0	0	A_42_P647072	NM_178102	8215.16	233.882	4.855032e+003	4.856667e+002	4827	41	9.105544e+000	0	0	0	0	0	0	4779.66	1	1	46.5243	41.9714
DATA	655	8	60	0	0	A_64_P125585	XM_001063000	8240.42	233.573	5.090116e+001	1.359925e+001	155.5	42.5	1.179423e+001	0	0	0	0	0	0	50.0656	1	0	57.5363	43.8438
DATA	656	8	61	0	0	A_42_P610317	NM_001108225	8266.16	233.882	9.867752e+003	9.868559e+002	9772	41	1.050287e+001	0	0	0	0	0	0	9695.46	1	1	46.5243	40.8966
DATA	657	8	62	0	0	A_42_P755831	NM_152935	8291.3	233.9	3.935917e+004	3.935937e+003	38942.5	39	6.421924e+000	0	0	0	0	0	0	38624.8	1	1	47.2035	40.1739
DATA	659	8	64	0	0	A_44_P386375	NM_053842	8342	234.226	1.674452e+003	1.679243e+002	1759	40.5	9.495154e+000	0	0	0	1	0	0	1638.39	1	1	45.4864	39.8095
DATA	660	8	65	0	0	A_43_P15565	NM_023953	8367.42	233.573	2.859647e+002	3.128937e+001	391	36	6.627492e+000	0	0	0	0	0	0	279.313	1	1	57.5363	36.069
DATA	661	8	66	0	0	A_42_P456701	NM_001009697	8392.58	233.573	1.569402e+003	1.574551e+002	1648	43	1.499023e+001	0	0	0	0	0	0	1530.04	1	1	57.5363	44.7241
DATA	662	8	67	0	0	A_43_P20388	ENSRNOT00000061333	8418.51	234.125	4.028428e+003	4.030444e+002	3897	42.5	1.068169e+001	0	0	0	0	0	0	3919.36	1	1	47.8731	40.4615
DATA	663	8	68	0	0	A_44_P572504	TC585660	8443.48	234.222	8.290123e+002	8.387996e+001	902	40	8.729656e+000	0	0	0	0	0	0	804.836	1	1	43.7019	40.7241
DATA	664	8	69	0	0	A_64_P059964	NM_001013858	8469.16	233.897	4.493945e+003	4.495769e+002	4472	39	1.106207e+001	0	0	0	0	0	0	4352.48	1	1	46.5243	41.7297
DATA	665	8	70	0	0	A_44_P1056293	ENSRNOT00000022862	8494.5	233.813	2.728467e+003	2.731486e+002	2677.5	42	8.322401e+000	0	0	0	0	0	0	2636.01	1	1	49.8279	42.0645
DATA	666	8	71	0	0	A_64_P133276	NM_001107464	8520	234	5.070223e+003	5.071857e+002	4945	40	1.037202e+001	0	0	0	0	0	0	4885.54	1	1	46.8651	38.6897
DATA	667	8	72	0	0	A_42_P667782	NM_001009673	8545.19	233.975	2.410172e+003	2.413626e+002	2420	39	7.892442e+000	0	0	0	0	0	0	2316	1	1	49.1849	38.8276
DATA	668	8	73	0	0	A_64_P023624	A_64_P023624	8570.41	233.908	1.120110e+003	1.127566e+002	1169	41	9.999431e+000	0	0	0	0	0	0	1073.23	1	1	49.1849	41.1053
DATA	669	8	74	0	0	A_64_P110130	NM_001106172	8595.85	233.864	5.914752e+002	6.055609e+001	698.5	39	8.499109e+000	0	0	0	0	0	0	564.997	1	1	46.1809	39.2121
DATA	670	8	75	0	0	A_64_P087728	XM_001078778	8621.3	233.9	4.333722e+002	4.525261e+001	520	35	9.744646e+000	0	0	0	0	0	0	412.66	1	1	47.2035	36.6207
DATA	671	8	76	0	0	A_44_P475356	NM_001177823	8646.48	234.078	3.481720e+002	3.718910e+001	439	41	9.939305e+000	0	0	0	0	0	0	330.455	1	1	49.5074	41.3514
DATA	672	8	77	0	0	A_42_P560984	NM_001109179	8672.22	234	1.808367e+004	1.808415e+003	16715	39	1.067823e+001	0	0	0	0	0	0	17104.1	1	1	46.1809	41.8966
DATA	673	8	78	0	0	A_42_P566906	NM_001006966	8697.56	234.027	1.063271e+004	1.063352e+003	10001	40.5	7.927833e+000	0	0	0	0	0	0	10021.4	1	1	48.5334	39.9643
DATA	674	8	79	66	1	DarkCorner	DarkCorner	8722.58	234.427	1.325884e+001	1.320724e+001	87	41.5	8.751115e+000	0	0	0	0	0	0	-24.9213	0	0	57.5363	41.2857
DATA	675	8	80	66	1	DarkCorner	DarkCorner	8748.4	234.027	1.330992e+001	1.325811e+001	83	41.5	1.019263e+001	0	0	0	0	0	0	-25.3505	0	0	48.8603	39.8
DATA	676	8	81	66	1	DarkCorner	DarkCorner	8773.63	233.955	1.336103e+001	1.330902e+001	84	38	9.503687e+000	0	0	0	0	0	0	-25.743	0	0	45.835	40.1515
DATA	677	8	82	66	1	DarkCorner	DarkCorner	8799.19	234.368	1.341371e+001	1.336151e+001	87	40	4.921972e+000	0	0	0	0	0	0	-24.3168	0	0	46.8651	39.6774
DATA	678	8	83	66	1	DarkCorner	DarkCorner	8824.42	234.427	1.346756e+001	1.341514e+001	89	44	6.988452e+000	0	0	0	0	0	0	-23.5739	0	0	57.5363	44.0385
DATA	679	8	84	66	1	DarkCorner	DarkCorner	8849.61	234.338	1.352289e+001	1.347026e+001	89	37	1.226298e+001	0	0	0	0	0	0	-24.7688	0	0	48.5334	40.5455
DATA	680	8	85	66	1	DarkCorner	DarkCorner	8875.09	233.947	1.358064e+001	1.352778e+001	94	34	8.987695e+000	0	0	0	0	0	0	-22.4849	0	0	46.8651	34.8914
DATA	681	9	1	66	1	DarkCorner	DarkCorner	6729.58	239.573	1.592870e+001	1.586670e+001	104	36	8.727506e+000	0	0	0	0	0	0	-6.20859	0	0	57.5363	36.7212
DATA	682	9	2	66	1	DarkCorner	DarkCorner	6755	239.545	1.581483e+001	1.575328e+001	93	43	9.976085e+000	0	0	0	0	0	0	-16.8886	0	0	55.8519	44.4118
DATA	683	9	3	66	1	DarkCorner	DarkCorner	6780.06	240.222	1.570168e+001	1.564057e+001	89	39	8.544292e+000	0	0	0	0	0	0	-19.1107	0	0	46.8651	40.1724
DATA	684	9	4	66	1	DarkCorner	DarkCorner	6805.58	239.573	1.559157e+001	1.553089e+001	90.5	40	1.399334e+001	0	0	0	0	0	0	-20.2326	0	0	57.5363	43.9643
DATA	685	9	5	66	1	DarkCorner	DarkCorner	6831.13	239.72	1.548042e+001	1.542016e+001	94.5	42	1.140006e+001	0	0	0	0	0	0	-15.4733	0	0	49.1849	44.7429
DATA	686	9	6	66	1	DarkCorner	DarkCorner	6856.56	240.055	1.537076e+001	1.531094e+001	92	40	1.146343e+001	0	0	0	0	0	0	-17.6948	0	0	48.5334	42.5556
DATA	687	9	7	66	1	DarkCorner	DarkCorner	6881.84	240.071	1.526412e+001	1.520471e+001	91	40	7.224999e+000	0	0	0	0	0	0	-14.9017	0	0	46.8651	38.8438
DATA	688	9	8	0	0	A_44_P195306	NM_019377	6907.42	239.573	7.208101e+004	7.208117e+003	58771	49	1.192123e+001	0	0	0	0	0	0	59209.6	1	1	57.5363	45.5172
DATA	689	9	9	0	0	A_44_P653240	NM_001202552	6932.66	240.271	2.411984e+003	2.416641e+002	2083	43	1.515950e+001	0	0	0	0	0	0	1995.09	1	1	47.5395	46.1034
DATA	690	9	10	0	0	A_64_P012778	ENSRNOT00000038310	6957.52	240.13	1.495452e+001	1.493272e+001	114	49.5	1.188871e+001	0	0	0	0	0	0	8.67733	0	0	47.5395	50.1471
DATA	691	9	11	0	0	A_43_P11430	NM_001130503	6983.41	240.092	2.164426e+003	2.169477e+002	1891.5	42.5	1.429316e+001	0	0	0	0	0	0	1814.66	1	1	49.1849	44.1389
DATA	692	9	12	0	0	A_44_P225353	NM_001009678	7008.76	240	1.482201e+003	1.489470e+002	1329	46	9.226231e+000	0	0	0	0	0	0	1250.94	1	1	46.8651	45.04
DATA	693	9	13	0	0	A_64_P055231	NM_001106620	7034.3	239.9	4.413509e+003	4.415924e+002	3892	39	7.637626e+000	0	0	0	0	0	0	3749.55	1	1	47.2035	39.6
DATA	694	9	14	0	0	A_42_P540950	NM_001009541	7059.73	239.945	2.883203e+003	2.886850e+002	2540	44.5	1.371493e+001	0	0	0	0	0	0	2465.42	1	1	48.5334	47.1071
DATA	695	9	15	0	0	A_64_P135888	ENSRNOT00000029916	7085	240	1.446990e+001	1.448538e+001	121.5	46	1.355877e+001	0	0	0	0	0	0	12.3951	0	0	54.9904	49.5667
DATA	696	9	16	0	0	A_64_P086448	NM_001008819	7110.38	240	2.254059e+002	2.670647e+001	300.5	47	9.130220e+000	0	0	0	0	0	0	195.197	1	1	48.5334	45.4667
DATA	697	9	17	0	0	A_42_P701779	NM_001108048	7136.07	240.214	4.079955e+003	4.082437e+002	3513.5	39.5	9.787253e+000	0	0	0	1	0	0	3555.43	1	1	46.8651	39.625
DATA	698	9	18	0	0	A_44_P409965	ENSRNOT00000036078	7161.26	240.53	5.270807e+001	1.509756e+001	151	45	9.999143e+000	0	0	0	0	0	0	46.211	1	0	45.4864	44.7813
DATA	699	9	19	0	0	A_44_P474037	NM_052807	7186.33	240.25	1.220488e+003	1.228565e+002	1189	45	9.973610e+000	0	0	0	0	0	0	1076.32	1	1	47.5395	45.5172
DATA	700	9	20	0	0	A_64_P156985	NM_001000385	7212	240.319	1.585279e+001	1.407182e+001	124	49.5	1.028250e+001	0	0	0	0	0	0	14.0631	1	0	65	48.8333
DATA	701	9	21	0	0	A_42_P635228	NM_001107651	7237.5	240.352	1.491211e+002	2.038728e+001	244.5	48	1.063492e+001	0	0	0	0	0	0	133.048	1	1	57.5363	48.3077
DATA	702	9	22	0	0	A_64_P240508	ENSRNOT00000018000	7262.58	240.427	4.231302e+002	4.451446e+001	480	52	1.030810e+001	0	0	0	0	0	0	379.616	1	1	57.5363	51.4348
DATA	703	9	23	0	0	A_64_P026509	NM_020656	7288.21	240.438	9.957959e+002	1.005243e+002	991	44	1.311215e+001	0	0	0	0	0	0	898.324	1	1	48.5334	45
DATA	704	9	24	0	0	A_42_P570241	NM_177928	7313.5	240.352	1.334030e+003	1.341022e+002	1324.5	38	1.516315e+001	0	0	0	0	0	0	1209.84	1	1	57.5363	42.7241
DATA	706	9	26	0	0	A_64_P032893	TC597420	7364.12	240.438	3.919859e+004	3.919882e+003	35641	39	5.944530e+000	0	0	0	0	0	0	35914	1	1	52.9257	38.8621
DATA	707	9	27	0	0	A_64_P043605	NM_001024799	7389.79	240.397	8.926914e+003	8.927930e+002	8057	42	8.951363e+000	0	0	0	0	0	0	8219.45	1	1	50.1463	41.2424
DATA	708	9	28	0	0	A_64_P095890	NM_019337	7415.12	240.618	1.118404e+004	1.118484e+003	10461.5	39.5	7.032018e+000	0	0	0	0	0	0	10346.8	1	1	52.9257	38.8333
DATA	709	9	29	0	0	A_42_P513145	NM_001107288	7440.73	240.137	3.435632e+003	3.438224e+002	3192.5	39	9.111706e+000	0	0	0	0	0	0	3193.06	1	1	48.2044	37.5938
DATA	710	9	30	0	0	A_64_P122317	NM_001108031	7466.12	240.412	6.852846e+002	6.980459e+001	738	39	1.098273e+001	0	0	0	0	0	0	639.752	1	1	46.5243	41.4706
DATA	711	9	31	0	0	A_64_P065492	NM_001109101	7491.42	240.427	1.359202e+002	1.896769e+001	240.5	41	1.188364e+001	0	0	0	0	0	0	127.432	1	1	57.5363	40.0357
DATA	712	9	32	0	0	A_64_P129273	NM_001105871	7516.7	240.348	7.073228e+002	7.194899e+001	784	41	9.907909e+000	0	0	0	0	0	0	665.875	1	1	46.8651	39.4
DATA	713	9	33	0	0	A_64_P050748	NM_181824	7542.11	240.5	1.389072e+002	1.910962e+001	236	42	9.231630e+000	0	0	0	0	0	0	131.289	1	1	65	42.1333
DATA	714	9	34	0	0	A_42_P689755	NM_053306	7567.3	240.5	3.513180e+002	3.748567e+001	430.5	42	1.262767e+001	0	0	0	0	0	0	333.303	1	1	49.1849	43.5161
DATA	715	9	35	0	0	A_64_P039586	TC635481	7592.88	240.603	7.602724e+002	7.713511e+001	814	41	6.958370e+000	0	0	0	0	0	0	723.937	1	1	48.5334	40.4324
DATA	716	9	36	0	0	A_64_P083474	NM_001134731	7618.31	240.52	7.587668e+003	7.588778e+002	7349	42	1.056694e+001	0	0	0	0	0	0	7250.07	1	1	49.1849	43.7813
DATA	718	9	38	0	0	A_42_P763553	NM_001107486	7669.3	240.507	5.551214e+002	5.699085e+001	639	47	9.603866e+000	0	0	0	0	0	0	533.846	1	1	46.8651	46.3514
DATA	719	9	39	0	0	A_44_P151513	NM_001000901	7694.45	240.577	2.735868e+001	1.314822e+001	132	45.5	9.761711e+000	0	0	0	0	0	0	26.3871	1	0	47.8731	43.4286
DATA	720	9	40	0	0	A_42_P460204	ENSRNOT00000020886	7720	240.577	2.184283e+003	2.188045e+002	2177	44	1.022898e+001	0	0	0	0	0	0	2112.59	1	1	47.8731	43.9189
DATA	721	9	41	0	0	A_44_P218147	NM_001013432	7745.7	240.568	1.815813e+002	2.221103e+001	286	40	9.583813e+000	0	0	0	0	0	0	176.082	1	1	48.5334	41.129
DATA	722	9	42	0	0	A_42_P554722	NM_001099758	7770.77	240.884	1.753576e+004	1.753622e+003	16742	41	1.052070e+001	0	0	0	0	0	0	17045.6	1	1	46.5243	42.9333
DATA	723	9	43	0	0	A_44_P135450	XM_223143	7796	240.545	2.067671e+003	2.071587e+002	2097.5	46.5	1.365177e+001	0	0	0	0	0	0	2014.3	1	1	55.8519	48.5882
DATA	724	9	44	0	0	A_64_P107329	NM_001013207	7821.63	240.64	2.816424e+004	2.816453e+003	27585	41	1.336751e+001	0	0	0	0	0	0	27494.4	1	1	48.8603	45.9032
DATA	725	9	45	0	0	A_64_P116219	NM_001004085	7847.18	240.361	1.577813e+004	1.577864e+003	15383.5	43	9.173446e+000	0	0	0	0	0	0	15431.7	1	1	47.8731	42.3214
DATA	726	9	46	0	0	A_44_P147396	NM_001191744	7872.16	240.46	7.554463e+001	1.474352e+001	177.5	44	7.745670e+000	0	0	0	0	0	0	74.0094	1	1	44.4243	44.7333
DATA	727	9	47	0	0	A_44_P975743	TC626448	7897.75	240.627	2.760908e+003	2.763801e+002	2746	40	1.282780e+001	0	0	0	0	0	0	2708.95	1	1	49.1849	44.9459
DATA	728	9	48	0	0	A_42_P728472	NM_001007600	7923.19	240.739	3.705655e+004	3.705677e+003	36568	41	9.238600e+000	0	0	0	0	0	0	36408	1	1	46.5243	40.6
DATA	729	9	49	0	0	A_64_P130139	NM_013181	7948.46	240.611	2.446624e+004	2.446656e+003	23615	42	9.240281e+000	0	0	0	0	0	0	24065.4	1	1	52.9257	40.871
DATA	730	9	50	0	0	A_42_P481087	XM_232226	7973.94	240.768	8.416753e+003	8.417696e+002	8136	43	5.801724e+000	0	0	0	0	0	0	8286.97	1	1	46.5243	42.92
DATA	731	9	51	0	0	A_44_P102465	NM_001000424	7999.16	240.851	1.182266e+002	1.726947e+001	222.5	40	1.381249e+001	0	0	0	0	0	0	116.495	1	1	46.1809	43.5806
DATA	732	9	52	0	0	A_64_P082557	ENSRNOT00000029274	8024.5	240.648	4.188229e+001	1.325941e+001	146	38	7.449765e+000	0	0	0	0	0	0	41.2935	1	0	57.5363	38.7188
DATA	733	9	53	0	0	A_64_P064873	XM_228599	8049.91	240.614	4.637429e+001	1.340305e+001	154.5	40	8.884337e+000	0	0	0	0	0	0	45.7418	1	0	57.259	42.3125
DATA	734	9	54	0	0	A_64_P042298	A_64_P042298	8075.12	240.735	1.719105e+002	2.129761e+001	270	39.5	1.017420e+001	0	0	0	0	0	0	169.609	1	1	45.835	40.8333
DATA	735	9	55	0	0	A_44_P286341	ENSRNOT00000038519	8100.85	240.985	1.898492e+001	1.271351e+001	121.5	41	5.694419e+000	0	0	0	0	0	0	18.7323	1	0	46.8651	40.6563
DATA	736	9	56	0	0	A_44_P994614	NM_001106646	8126.12	241	5.698090e+004	5.698104e+003	56630	41	7.320519e+000	0	0	0	0	0	0	56216.8	1	1	49.8279	41.56
DATA	737	9	57	0	0	A_64_P098354	XM_001066867	8151.5	241	2.221475e+002	2.552740e+001	318	48	1.131371e+001	0	0	0	0	0	0	219.106	1	1	48.5334	48.3333
DATA	738	9	58	0	0	A_64_P117373	NM_001107752	8176.91	240.935	4.142374e+002	4.329233e+001	515	41.5	7.961348e+000	0	0	0	0	0	0	408.377	1	1	54.4085	42.3125
DATA	739	9	59	0	0	A_64_P111395	ENSRNOT00000025391	8202.64	241.13	9.153747e+002	9.239918e+001	994	40	7.402806e+000	0	0	0	0	0	0	901.854	1	1	46.8651	39.8077
DATA	740	9	60	0	0	A_64_P059465	XM_229201	8227.82	241.141	2.692306e+001	1.288417e+001	129.5	40	8.178061e+000	0	0	0	0	0	0	26.5042	1	0	46.8651	40.4545
DATA	741	9	61	0	0	A_64_P010852	NM_001106214	8253.12	241	4.690361e+004	4.690378e+003	46921.5	41	1.346762e+001	0	0	0	0	0	0	46128.6	1	1	49.8279	43.6552
DATA	742	9	62	0	0	A_64_P024967	NM_001008359	8278.49	240.809	6.839123e+001	1.435987e+001	171	40	8.962886e+000	0	0	0	0	0	0	67.1837	1	1	46.8651	39.8889
DATA	743	9	63	0	0	A_44_P278418	NM_012538	8303.61	241.069	9.689487e+001	1.592882e+001	203	37.5	7.685278e+000	0	0	0	0	0	0	95.0623	1	1	53.8203	39.2143
DATA	744	9	64	0	0	A_44_P821875	NM_001009500	8329.42	241.427	7.944219e+001	1.494741e+001	182	41	8.894033e+000	0	0	0	0	0	0	77.8246	1	1	57.5363	40.8438
DATA	745	9	65	0	0	A_64_P066737	A_64_P066737	8354.49	240.971	7.774002e+001	1.487536e+001	183	36.5	8.704086e+000	0	0	0	0	0	0	76.0322	1	1	47.2035	38.8056
DATA	746	9	66	0	0	A_64_P003943	TC616650	8380.09	241.386	1.039075e+002	1.641293e+001	205	39.5	1.198989e+001	0	0	0	0	0	0	101.444	1	1	57.259	41.3667
DATA	747	9	67	0	0	A_64_P047035	ENSRNOT00000066263	8405.31	241.294	1.828811e+001	1.286039e+001	126	42	9.930191e+000	0	0	0	0	0	0	17.8198	1	0	46.5243	39.5
DATA	748	9	68	0	0	A_64_P113867	NM_001077201	8430.77	241.101	1.293747e+003	1.300021e+002	1366.5	36	8.376157e+000	0	0	0	0	0	0	1257.94	1	1	46.5243	38.08
DATA	749	9	69	0	0	A_64_P013758	NM_012582	8456.42	241.427	1.606930e+002	2.053517e+001	263	37	8.353126e+000	0	0	0	0	0	0	155.894	1	1	65	38.4667
DATA	750	9	70	0	0	A_44_P303982	NM_001106381	8481.58	241.427	3.979468e+002	4.180752e+001	505.5	39.5	7.806112e+000	0	0	0	0	0	0	385.143	1	1	57.5363	39.1538
DATA	751	9	71	0	0	A_64_P048601	A_64_P048601	8507.28	240.967	2.239082e+003	2.242766e+002	2310	40	9.839714e+000	0	0	0	0	0	0	2161.39	1	1	44.7812	41.7059
DATA	752	9	72	0	0	A_44_P304880	NM_001014261	8532.57	240.968	2.313934e+002	2.648447e+001	332	40	8.441014e+000	0	0	0	0	0	0	222.767	1	1	44.0646	38.5926
DATA	753	9	73	0	0	A_64_P096767	ENSRNOT00000039549	8557.58	241.427	1.297001e+001	1.291953e+001	103.5	39	8.222035e+000	0	0	0	0	0	0	-2.78377	0	0	57.5363	38.25
DATA	754	9	74	0	0	A_43_P21810	NM_001025000	8583.33	241.5	1.933471e+001	1.310174e+001	129	42	1.044167e+001	0	0	0	0	0	0	18.5072	1	0	57.5363	40.8286
DATA	756	9	76	0	0	A_64_P084976	NM_001008916	8634.13	241.286	1.309142e+001	1.304161e+001	110.5	40	1.090376e+001	0	0	0	0	0	0	1.63731	0	0	47.2035	40.2727
DATA	757	9	77	0	0	A_64_P040004	XM_001054754	8659.77	241.116	5.237551e+003	5.239185e+002	5048	41	9.319540e+000	0	0	0	0	0	0	4964.98	1	1	46.5243	41.7188
DATA	758	9	78	0	0	A_64_P156785	XM_001058828	8684.58	241.427	1.317988e+001	1.312858e+001	105	40	8.170495e+000	0	0	0	0	0	0	-5.05905	0	0	65	38.0968
DATA	759	9	79	0	0	A_64_P123914	XM_217505	8710.3	241.143	2.039026e+004	2.039068e+003	19043	39	6.889522e+000	0	0	0	0	0	0	19194.5	1	1	47.2035	39.4138
DATA	760	9	80	66	1	DarkCorner	DarkCorner	8735.25	241.418	1.327542e+001	1.322375e+001	84.5	44	9.349405e+000	0	0	0	0	0	0	-25.0619	0	0	46.5243	42.3214
DATA	761	9	81	66	1	DarkCorner	DarkCorner	8760.9	241.116	1.332652e+001	1.327465e+001	87	38	9.689628e+000	0	0	0	0	0	0	-26.113	0	0	46.8651	38
DATA	762	9	82	66	1	DarkCorner	DarkCorner	8786.56	241.873	1.337790e+001	1.332583e+001	83	41	8.510794e+000	0	0	0	0	0	0	-29.5388	0	0	47.8731	42.9143
DATA	763	9	83	66	1	DarkCorner	DarkCorner	8811.89	241.329	1.343166e+001	1.337939e+001	88	41	5.857564e+000	0	0	0	0	0	0	-23.5436	0	0	48.8603	40.1471
DATA	764	9	84	66	1	DarkCorner	DarkCorner	8837.45	241.657	1.348620e+001	1.343371e+001	85.5	44	1.104626e+001	0	0	0	0	0	0	-25.0599	0	0	46.5243	41.4074
DATA	765	9	85	66	1	DarkCorner	DarkCorner	8862.73	240.939	1.354290e+001	1.349019e+001	89	37.5	1.001825e+001	0	0	0	0	0	0	-24.43	0	0	45.835	41.3095
DATA	766	10	1	66	1	DarkCorner	DarkCorner	6741.87	247.1	1.585049e+001	1.578880e+001	99	39.5	1.051868e+001	0	0	0	0	0	0	-14.1108	0	0	46.8651	39.8462
DATA	767	10	2	66	1	DarkCorner	DarkCorner	6767.3	247.304	1.573711e+001	1.567586e+001	94.5	41	1.023341e+001	0	0	0	0	0	0	-15.5699	0	0	46.8651	41.5484
DATA	768	10	3	66	1	DarkCorner	DarkCorner	6793	247	1.562529e+001	1.556448e+001	103	43	1.210850e+001	0	0	0	0	0	0	-7.37487	0	0	65	46.4828
DATA	769	10	4	66	1	DarkCorner	DarkCorner	6818.5	247	1.551474e+001	1.545435e+001	94	43	1.356792e+001	0	0	0	0	0	0	-15.9427	0	0	54.1152	47.5405
DATA	770	10	5	66	1	DarkCorner	DarkCorner	6843.94	247.057	1.540566e+001	1.534570e+001	95	47	1.384928e+001	0	0	0	0	0	0	-15.2507	0	0	46.8651	47.5625
DATA	771	10	6	66	1	DarkCorner	DarkCorner	6869.03	247.143	1.529949e+001	1.523994e+001	97	41	9.069596e+000	0	0	0	0	0	0	-12.1762	0	0	48.5334	40.8485
DATA	772	10	7	0	0	A_64_P139937	XM_001070013	6894.5	247.352	1.519290e+001	1.513397e+001	110	42	1.130398e+001	0	0	0	0	0	0	0.640952	0	0	57.5363	42.9118
DATA	773	10	8	0	0	A_44_P185613	XM_001080030	6920	247.455	6.837462e+002	7.000694e+001	673	48	1.266695e+001	0	0	0	0	0	0	564.294	1	1	55.8519	46.5806
DATA	774	10	9	0	0	A_42_P738520	NM_001007746	6945.44	247.534	3.359234e+003	3.362549e+002	2808	46	1.289657e+001	0	0	0	1	0	0	2791.38	1	1	49.1849	47.1923
DATA	775	10	10	66	-1	(-)3xSLv1	NegativeControl	6970.58	247.427	1.488589e+001	1.482795e+001	103	44	1.066842e+001	0	0	0	0	0	0	-5.40569	0	0	57.5363	43.3793
DATA	776	10	11	0	0	A_42_P626023	NM_001107265	6996.42	247.427	3.036176e+003	3.039746e+002	2591.5	41	9.131884e+000	0	0	0	0	0	0	2557.07	1	1	57.5363	40.5
DATA	777	10	12	0	0	A_43_P11120	XR_085824	7021.54	247.614	5.454078e+003	5.456041e+002	4733.5	43	1.514028e+001	0	0	0	0	0	0	4623.58	1	1	47.5395	44.1935
DATA	778	10	13	0	0	A_42_P473425	NM_138844	7047	247.455	2.561925e+002	2.945626e+001	322	40	9.588799e+000	0	0	0	0	0	0	218.596	1	1	55.8519	40.4848
DATA	779	10	14	0	0	A_44_P692981	ENSRNOT00000007422	7072.44	247.662	1.788289e+002	2.298731e+001	263	45	1.956233e+001	0	0	0	0	0	0	153.572	1	1	47.8731	51.4483
DATA	780	10	15	0	0	A_64_P102366	A_64_P102366	7097.32	247.544	6.220861e+001	1.564482e+001	160.5	47	7.618298e+000	0	0	0	0	0	0	53.7532	1	0	46.8651	46.0385
DATA	781	10	16	0	0	A_42_P616287	NM_001134555	7123.06	247.538	1.018746e+003	1.028685e+002	986	40	1.024802e+001	0	0	0	0	0	0	885.833	1	1	44.7812	41.9143
DATA	782	10	17	0	0	A_64_P073995	XM_001081370	7148.5	247.5	5.665375e+001	1.526797e+001	155.5	40	6.034511e+000	0	0	0	0	0	0	49.564	1	0	57.5363	39.6875
DATA	783	10	18	0	0	A_42_P595381	NM_001107258	7173.89	247.5	5.468076e+003	5.469892e+002	4872	43	9.856674e+000	0	0	0	0	0	0	4812.53	1	1	56.9804	43.8667
DATA	784	10	19	0	0	A_42_P462205	NM_001007745	7199.37	247.573	1.157113e+004	1.157198e+003	10015	45	9.329081e+000	0	0	0	0	0	0	10244.2	1	1	49.1849	45.0714
DATA	785	10	20	0	0	A_64_P016102	A_64_P016102	7224.58	247.427	5.111488e+001	1.483896e+001	154	46	9.221089e+000	0	0	0	0	0	0	45.5117	1	0	57.5363	45.5185
DATA	786	10	21	0	0	A_64_P017829	NM_001128216	7250.11	247.5	2.338808e+001	1.404814e+001	126	50	1.042785e+001	0	0	0	0	0	0	20.9426	1	0	56.9804	50.36
DATA	787	10	22	0	0	A_64_P090244	NM_001127449	7275.5	247.5	1.661261e+005	1.661261e+004	151314	51	9.990472e+000	0	0	0	0	0	0	149576	1	1	57.5363	49.4286
DATA	788	10	23	0	0	A_42_P503626	NM_001044247	7300.89	247.5	1.860436e+002	2.310577e+001	280.5	42	1.206853e+001	0	0	0	0	0	0	168.411	1	1	56.9804	43.129
DATA	789	10	24	0	0	A_64_P144850	ENSRNOT00000002335	7326.25	247.794	9.988277e+001	1.689843e+001	196.5	44.5	1.532863e+001	0	0	0	0	0	0	90.8929	1	1	46.1809	45.1786
DATA	790	10	25	0	0	A_42_P703023	NM_145776	7351.63	247.75	1.897465e+003	1.902305e+002	1836	38.5	9.520287e+000	0	0	0	0	0	0	1735.49	1	1	46.5243	39.875
DATA	791	10	26	0	0	A_64_P153581	NM_001109367	7377.11	247.5	1.308568e+002	1.879730e+001	226.5	40	9.460544e+000	0	0	0	0	0	0	120.279	1	1	56.9804	40.2424
DATA	792	10	27	0	0	A_44_P156782	NM_001013879	7402.42	248.172	1.263733e+003	1.270848e+002	1272	39	7.714056e+000	0	0	0	0	0	0	1167.23	1	1	44.7812	38.56
DATA	793	10	28	0	0	A_43_P12841	NM_053535	7427.67	247.5	6.634729e+002	6.768064e+001	732.5	39	7.084466e+000	0	0	0	0	0	0	615.609	1	1	57.5363	38.7586
DATA	794	10	29	0	0	A_64_P097715	NM_001135710	7453.15	247.956	1.922291e+002	2.337958e+001	289	39	8.580154e+000	0	0	0	0	0	0	179.176	1	1	46.8651	38.2857
DATA	795	10	30	0	0	A_42_P769597	NM_001106230	7478.61	247.594	2.624797e+003	2.628139e+002	2603.5	41	1.095413e+001	0	0	0	0	0	0	2457.17	1	1	47.5395	42.3529
DATA	796	10	31	0	0	A_42_P561835	ENSRNOT00000043937	7504.16	248.224	6.493766e+002	6.626437e+001	731	41	1.032038e+001	0	0	0	0	0	0	610.506	1	1	46.1809	39.2
DATA	797	10	32	0	0	A_42_P604399	NM_012941	7529.64	247.742	1.971202e+004	1.971246e+003	18477.5	41	4.947152e+000	0	0	0	0	0	0	18606.3	1	1	46.1809	40.7391
DATA	798	10	33	0	0	A_42_P744495	NM_017125	7554.83	248.323	3.551016e+004	3.551040e+003	33276	47.5	1.315395e+001	0	0	0	0	0	0	33648.5	1	1	45.4864	46.2857
DATA	799	10	34	0	0	A_64_P047391	A_64_P047391	7580.06	248.175	1.446148e+003	1.452017e+002	1531	39.5	9.189043e+000	0	0	0	0	0	0	1375.36	1	1	45.4864	38.5294
DATA	800	10	35	0	0	A_44_P856007	NM_001108489	7605.48	248.188	6.339992e+002	6.471822e+001	691	41	1.239130e+001	0	0	0	0	0	0	605.101	1	1	47.2035	43.0625
DATA	801	10	36	0	0	A_64_P057562	ENSRNOT00000031129	7630.83	248.323	1.485335e+003	1.490971e+002	1522	43	1.117846e+001	0	0	0	0	0	0	1422.41	1	1	45.4864	44.5714
DATA	802	10	37	0	0	A_64_P102395	ENSRNOT00000029656	7656.43	248.032	2.575295e+002	2.880818e+001	355	44	1.064749e+001	0	0	0	0	0	0	247.409	1	1	44.0646	45.0357
DATA	803	10	38	0	0	A_64_P132318	NM_133296	7682	248.226	1.244156e+004	1.244222e+003	12114	41	1.039476e+001	0	0	0	0	0	0	11989.1	1	1	45.4864	44.3636
DATA	805	10	40	0	0	A_64_P158848	NM_001130540	7732.79	248.121	5.581218e+003	5.582686e+002	5523.5	42	8.990317e+000	0	0	0	0	0	0	5407.93	1	1	43.3362	42.3226
DATA	806	10	41	0	0	A_64_P302888	NM_001135015	7757.91	247.935	3.225523e+002	3.469104e+001	423	38	8.701872e+000	0	0	0	0	0	0	313.305	1	1	54.4085	39.4516
DATA	807	10	42	0	0	A_42_P604331	NM_001108533	7783.5	248	1.062913e+005	1.062914e+004	104467	44	1.158711e+001	0	0	0	0	0	0	103485	1	1	54.1152	45.2414
DATA	808	10	43	0	0	A_64_P166406	NM_019152	7808.84	248.103	1.840408e+003	1.844793e+002	1897	43	1.289012e+001	0	0	0	0	0	0	1795.65	1	1	46.5243	46.0303
DATA	809	10	44	0	0	A_64_P123660	NM_001031655	7834.38	248	4.388650e+003	4.390484e+002	4103	40.5	8.858885e+000	0	0	0	0	0	0	4290.33	1	1	48.5334	41.6875
DATA	810	10	45	0	0	A_42_P668800	NM_001127553	7859.84	247.897	2.183629e+003	2.187299e+002	2167.5	45	8.099905e+000	0	0	0	0	0	0	2138.49	1	1	46.5243	44.8571
DATA	811	10	46	0	0	A_64_P090458	NM_001109516	7884.91	248.065	1.269487e+001	1.265855e+001	113	41.5	1.000805e+001	0	0	0	0	0	0	5.64589	0	0	54.4085	43.6944
DATA	812	10	47	0	0	A_42_P635396	NM_001109506	7910.36	248.072	4.626382e+003	4.628105e+002	4518	40	9.870674e+000	0	0	0	0	0	0	4544.38	1	1	46.5243	41.2593
DATA	813	10	48	0	0	A_64_P002989	NM_031604	7935.5	248	8.590802e+004	8.590812e+003	85540	41	9.571593e+000	0	0	0	0	0	0	84488.2	1	1	54.1152	40.3333
DATA	814	10	49	0	0	A_44_P914346	DV717012	7961.26	248.222	5.382316e+003	5.383791e+002	5304	41	9.623810e+000	0	0	0	0	0	0	5299.09	1	1	47.5395	41.6071
DATA	815	10	50	0	0	A_44_P791176	NM_001130577	7986.5	248.352	2.627881e+001	1.285889e+001	132	44	9.014234e+000	0	0	0	0	0	0	25.8951	1	0	57.5363	44.1111
DATA	816	10	51	0	0	A_64_P011894	NM_001004210	8011.96	248.06	2.942592e+004	2.942619e+003	28945	40	1.152351e+001	0	0	0	0	0	0	29015.9	1	1	46.8651	40.4839
DATA	817	10	52	0	0	A_42_P717654	XM_001063683	8037.37	248.36	9.185729e+003	9.186589e+002	8881	40	8.413375e+000	0	0	0	0	0	0	9062.55	1	1	48.8603	40.4571
DATA	818	10	53	0	0	A_64_P006102	NM_001100784	8062.81	247.957	1.192203e+003	1.198810e+002	1264	40	9.477742e+000	0	0	0	0	0	0	1176.58	1	1	46.8651	41.5517
DATA	819	10	54	0	0	A_64_P116038	NM_001000335	8087.94	247.952	1.607620e+001	1.266885e+001	120.5	40.5	8.950790e+000	0	0	0	0	0	0	15.868	1	0	45.4864	40.2105
DATA	820	10	55	0	0	A_42_P581567	NM_001011899	8113.47	248.071	1.489916e+003	1.495206e+002	1549.5	40	8.398379e+000	0	0	0	0	0	0	1470.6	1	1	47.8731	38.9259
DATA	821	10	56	0	0	A_42_P671206	FQ231880	8139	248.191	4.528149e+003	4.529893e+002	4503	48	1.034221e+001	0	0	0	0	0	0	4468.59	1	1	46.8651	47.8065
DATA	823	10	58	0	0	A_64_P078205	NM_001044255	8190	248.271	7.179093e+003	7.180195e+002	6998	39.5	7.156825e+000	0	0	0	0	0	0	7078.14	1	1	46.8651	39.8529
DATA	824	10	59	66	-1	(-)3xSLv1	NegativeControl	8215	248.455	1.263859e+001	1.258939e+001	89	39	8.595497e+000	0	0	0	0	0	0	-13.8122	0	0	55.8519	39.4848
DATA	825	10	60	0	0	A_44_P259051	NM_001037658	8240.81	248.608	3.521568e+003	3.523821e+002	3514.5	40.5	8.731288e+000	0	0	0	0	0	0	3466.52	1	1	49.1849	40.6538
DATA	826	10	61	0	0	A_64_P325262	A_64_P325262	8265.58	248.427	5.476150e+001	1.375122e+001	158.5	39	7.478047e+000	0	0	0	0	0	0	53.8495	1	0	57.5363	39.2759
DATA	827	10	62	0	0	A_64_P140005	NM_001191804	8291.21	248.086	3.421197e+001	1.308478e+001	139	37.5	9.311962e+000	0	0	0	0	0	0	33.6001	1	0	46.8651	39.3333
DATA	828	10	63	0	0	A_42_P588606	NM_001134544	8316.75	248.361	3.989804e+002	4.185452e+001	495	39	7.065743e+000	0	0	0	0	0	0	391.304	1	1	51.0895	39.5161
DATA	829	10	64	0	0	A_42_P788541	NM_001106794	8341.87	248.376	1.641442e+004	1.641491e+003	16083	40	8.631738e+000	0	0	0	0	0	0	16074	1	1	52.0157	38.9
DATA	830	10	65	0	0	A_44_P1050200	NM_001108000	8367.44	248.479	1.697576e+003	1.702311e+002	1756	36	9.593204e+000	0	0	0	0	0	0	1659.52	1	1	48.2044	39.3793
DATA	831	10	66	0	0	A_42_P777935	ENSRNOT00000027369	8393	248.422	1.144097e+003	1.151137e+002	1222	41	7.762343e+000	0	0	0	0	0	0	1116.34	1	1	44.0646	39.4286
DATA	832	10	67	0	0	A_44_P349475	NM_031333	8418.2	248.681	4.066904e+003	4.068899e+002	3984	40.5	8.266318e+000	0	0	0	0	0	0	3960.37	1	1	47.2035	39.9643
DATA	833	10	68	0	0	A_64_P136188	XM_001059617	8443.5	248.5	3.228414e+002	3.471619e+001	422.5	37	7.607351e+000	0	0	0	0	0	0	313.702	1	1	57.5363	37.5556
DATA	834	10	69	0	0	A_64_P023386	NM_001106232	8469.07	248.411	4.895537e+004	4.895553e+003	47999	44.5	1.262379e+001	0	0	0	0	0	0	47458.2	1	1	53.5237	45
DATA	835	10	70	0	0	A_64_P048576	NM_001000163	8494.42	248.573	8.444521e+001	1.535665e+001	191	41	7.736825e+000	0	0	0	0	0	0	81.6623	1	1	57.5363	39.5385
DATA	836	10	71	1028	1	(+)E1A_r60_a20	E1A_r60_a20	8519.58	248.573	2.794386e+001	1.315968e+001	133	38.5	9.742725e+000	0	0	0	0	0	0	26.9533	1	0	65	40.9
DATA	837	10	72	0	0	A_64_P078510	XM_001053102	8545.11	248.5	4.521136e+002	4.701438e+001	570	41	6.955347e+000	0	0	0	0	0	0	434.883	1	1	56.9804	40.6552
DATA	838	10	73	0	0	A_64_P101533	A_64_P101533	8570.06	248.905	1.298183e+001	1.293130e+001	109	42	9.775436e+000	0	0	0	0	0	0	-0.325098	0	0	45.4864	41.6774
DATA	839	10	74	0	0	A_64_P164601	ENSRNOT00000050537	8595.8	248.761	1.402896e+002	1.910645e+001	240.5	40	8.441295e+000	0	0	0	0	0	0	134.155	1	1	46.8651	40.7429
DATA	840	10	75	0	0	A_42_P694928	NM_001109046	8621.44	248.466	2.486174e+002	2.806113e+001	345	41.5	1.205360e+001	0	0	0	0	0	0	236.989	1	1	49.1849	40.4688
DATA	841	10	76	0	0	A_42_P510565	ENSRNOT00000046259	8646.87	248.757	6.014926e+002	6.154962e+001	675	41.5	9.028131e+000	0	0	0	0	0	0	571.504	1	1	46.5243	41.75
DATA	842	10	77	0	0	A_64_P050877	XM_001081816	8672	248.545	2.059158e+001	1.325937e+001	129	40	8.281032e+000	0	0	0	0	0	0	19.4993	1	0	65	38.963
DATA	843	10	78	0	0	A_44_P281352	NM_001013076	8697.7	248.9	2.307014e+003	2.310755e+002	2259	37.5	6.607676e+000	0	0	0	0	0	0	2177	1	1	47.2035	38.4286
DATA	844	10	79	0	0	A_44_P269675	ENSRNOT00000031839	8722.89	248.662	2.847774e+003	2.850827e+002	2734	37	8.567147e+000	0	0	0	0	0	0	2677.65	1	1	47.8731	39.6296
DATA	845	10	80	66	1	DarkCorner	DarkCorner	8748.54	248.853	1.329277e+001	1.324104e+001	85	42	9.456181e+000	0	0	0	0	0	0	-26.18	0	0	46.8651	39.25
DATA	846	10	81	66	1	DarkCorner	DarkCorner	8774.01	248.708	1.334378e+001	1.329185e+001	82	40	9.961944e+000	0	0	0	0	0	0	-29.4417	0	0	47.8731	41.7714
DATA	847	10	82	66	1	DarkCorner	DarkCorner	8798.97	248.747	1.339499e+001	1.334285e+001	86	38.5	7.940117e+000	0	0	0	0	0	0	-25.9208	0	0	49.1849	40.5
DATA	848	10	83	66	1	DarkCorner	DarkCorner	8824.64	249.188	1.344852e+001	1.339617e+001	84	43.5	7.271146e+000	0	0	0	0	0	0	-28.8341	0	0	46.8651	43.5
DATA	849	10	84	66	1	DarkCorner	DarkCorner	8849.72	248.882	1.350314e+001	1.345058e+001	88	38	1.041197e+001	0	0	0	0	0	0	-25.0539	0	0	45.835	40.2667
DATA	850	10	85	66	1	DarkCorner	DarkCorner	8875.35	248.756	1.356001e+001	1.350724e+001	94	34	7.991765e+000	0	0	0	0	0	0	-18.2715	0	0	49.1849	33.8192
DATA	851	11	1	66	1	DarkCorner	DarkCorner	6729.44	254.734	1.588242e+001	1.582061e+001	106	35	8.862245e+000	0	0	0	1	0	0	-3.82701	0	0	50.7771	36.0267
DATA	852	11	2	66	1	DarkCorner	DarkCorner	6754.66	254.592	1.577118e+001	1.570979e+001	93	41.5	1.253230e+001	0	0	0	0	0	0	-15.1896	0	0	47.8731	44.1
DATA	853	11	3	66	1	DarkCorner	DarkCorner	6780.42	254.427	1.565874e+001	1.559780e+001	94	41	9.915317e+000	0	0	0	0	0	0	-13.9875	0	0	57.5363	42.4063
DATA	854	11	4	66	1	DarkCorner	DarkCorner	6805.58	254.427	1.554964e+001	1.548912e+001	88	43.5	1.230616e+001	0	0	0	0	0	0	-20.1539	0	0	57.5363	46.1923
DATA	855	11	5	66	1	DarkCorner	DarkCorner	6831.05	254.65	1.543992e+001	1.537983e+001	90.5	40	1.170435e+001	0	0	0	0	0	0	-19.5367	0	0	50.1463	43.4615
DATA	856	11	6	66	1	DarkCorner	DarkCorner	6856.56	254.479	1.533252e+001	1.527284e+001	95	44	1.183357e+001	0	0	0	0	0	0	-16.0643	0	0	49.1849	44.3667
DATA	857	11	7	0	0	A_64_P077381	A_64_P077381	6881.9	254.686	2.132946e+001	1.531631e+001	126	38	9.143732e+000	0	0	0	0	0	0	17.4433	1	0	47.2035	38.7059
DATA	858	11	8	0	0	A_64_P085926	NM_030860	6907.38	254.57	2.253378e+003	2.258407e+002	1956	43	1.164860e+001	0	0	0	0	0	0	1855.55	1	1	50.4627	43.3529
DATA	859	11	9	0	0	A_42_P598560	NM_001033693	6932.63	254.64	3.127693e+003	3.131270e+002	2678	46	1.272153e+001	0	0	0	0	0	0	2593.04	1	1	48.8603	47.1379
DATA	860	11	10	0	1	ETG08_142674	ETG08_142674	6958.11	254.5	1.491864e+001	1.486197e+001	108	43	1.169696e+001	0	0	0	0	0	0	1.69871	0	0	56.9804	45.1786
DATA	861	11	11	0	0	A_42_P724142	NM_001106340	6983.5	254.711	4.018304e+003	4.021014e+002	3359	42	1.016129e+001	0	0	0	0	0	0	3376.54	1	1	49.1849	42.7
DATA	862	11	12	0	0	A_64_P054193	NM_001014193	7008.67	254.5	7.577861e+004	7.577875e+003	64919.5	42.5	1.357622e+001	0	0	0	0	0	0	64091.7	1	1	57.5363	44.9231
DATA	863	11	13	0	0	A_42_P750554	NM_001107846	7034.44	254.468	9.054172e+003	9.055344e+002	7770.5	43	1.252614e+001	0	0	0	0	0	0	7708.57	1	1	49.8279	42.9143
DATA	864	11	14	0	0	A_44_P285547	NM_053393	7059.77	254.884	4.106096e+002	4.353766e+001	460	44	1.190573e+001	0	0	0	0	0	0	351.854	1	1	46.5243	43.8519
DATA	865	11	15	0	0	A_42_P623374	NM_138845	7085.24	254.761	5.767833e+003	5.769626e+002	4846.5	45	1.193908e+001	0	0	0	0	0	0	4973.9	1	1	46.8651	44.3077
DATA	866	11	16	0	0	A_64_P064888	NM_001127303	7110.42	254.573	2.752247e+002	3.101360e+001	347	47	9.090711e+000	0	0	0	0	0	0	238.805	1	1	57.5363	43.5556
DATA	867	11	17	0	0	A_44_P522406	NM_001001103	7135.61	255.129	6.308335e+001	1.554517e+001	165	37.5	7.126980e+000	0	0	0	0	0	0	55.0737	1	0	47.2035	38.0769
DATA	868	11	18	0	0	A_42_P660129	NM_130422	7161.39	255.203	5.934113e+002	6.099813e+001	636.5	38	6.089609e+000	0	0	0	0	0	0	521.246	1	1	47.2035	38.8
DATA	869	11	19	0	0	A_64_P035679	A_64_P035679	7186.58	254.573	7.934414e+004	7.934426e+003	69430	44	8.683972e+000	0	0	0	0	0	0	70099.1	1	1	57.5363	44.6786
DATA	870	11	20	0	0	A_64_P118862	NM_001191999	7212	254.545	1.719727e+002	2.214917e+001	261	45	8.961830e+000	0	0	0	0	0	0	152.817	1	1	55.8519	44.2424
DATA	871	11	21	0	0	A_42_P638181	NM_133395	7237.52	254.853	1.522379e+004	1.522442e+003	13414	46	9.291502e+000	0	0	0	1	0	0	13605.8	1	1	49.8279	45.9643
DATA	872	11	22	0	0	A_44_P423803	NM_031144	7262.7	254.9	5.182560e+004	5.182578e+003	46647	49	1.098706e+001	0	0	0	0	0	0	46573.2	1	1	47.2035	48.4783
DATA	874	11	24	0	0	A_44_P445195	NM_133300	7313.71	255.167	7.622193e+003	7.623416e+002	6898	47	1.234426e+001	0	0	0	0	0	0	6923.83	1	1	45.835	47.2258
DATA	875	11	25	0	0	A_42_P563276	NM_013093	7339	254.681	1.344541e+002	1.911419e+001	230	42	1.053929e+001	0	0	0	0	0	0	122.756	1	1	58.0869	41.08
DATA	876	11	26	0	0	A_42_P535608	NM_001107160	7364.27	254.887	2.065757e+002	2.468750e+001	304.5	37.5	1.019077e+001	0	0	0	0	0	0	189.547	1	1	44.7812	39
DATA	877	11	27	0	0	A_44_P233080	ENSRNOT00000026303	7389.83	255	2.045217e+004	2.045261e+003	18512	38	8.210545e+000	0	0	0	0	0	0	18858.4	1	1	46.8651	37.75
DATA	878	11	28	0	0	A_43_P13320	NM_138880	7415.39	254.931	3.286546e+001	1.378599e+001	138	37	7.632215e+000	0	0	0	0	0	0	30.448	1	0	53.8203	38.4074
DATA	879	11	29	0	0	A_42_P548007	NM_001135020	7440.7	254.9	1.639202e+004	1.639256e+003	15031.5	40	7.532197e+000	0	0	0	0	0	0	15255.4	1	1	47.2035	39.3448
DATA	880	11	30	0	0	A_44_P282853	NM_031983	7466	255	6.494362e+003	6.495718e+002	6104	39	1.139043e+001	0	0	0	0	0	0	6070.66	1	1	51.4001	40.25
DATA	881	11	31	0	0	A_42_P552341	NM_053519	7491.31	255	3.061307e+003	3.064158e+002	2902	36.5	1.039031e+001	0	0	0	0	0	0	2873.72	1	1	50.4627	38.9615
DATA	882	11	32	0	0	A_64_P031476	NM_001107172	7516.72	255.066	2.189637e+002	2.554641e+001	314.5	40	1.002919e+001	0	0	0	0	0	0	206.391	1	1	49.1849	38.2308
DATA	883	11	33	0	0	A_42_P620762	NM_024403	7542.16	255.103	2.740941e+004	2.740972e+003	26176	45	9.911778e+000	0	0	0	0	0	0	25937.5	1	1	46.5243	44.92
DATA	884	11	34	0	0	A_64_P135370	A_64_P135370	7567.29	255.147	1.179000e+003	1.186210e+002	1239.5	42	1.233540e+001	0	0	0	0	0	0	1119.85	1	1	45.835	42.9
DATA	885	11	35	0	0	A_42_P576202	NM_001108583	7592.89	255.352	2.786065e+003	2.789101e+002	2639	39	9.836471e+000	0	0	0	0	0	0	2655.96	1	1	47.8731	39.5517
DATA	886	11	36	0	0	A_64_P022879	NM_001109019	7618.42	255.427	1.855524e+002	2.263683e+001	288	41	9.466734e+000	0	0	0	0	0	0	177.499	1	1	57.5363	41.7143
DATA	887	11	37	0	0	A_42_P711589	NM_022948	7644	254.922	1.139487e+004	1.139561e+003	10841	36	8.505012e+000	0	0	0	0	0	0	10935.8	1	1	46.1809	40.0909
DATA	888	11	38	0	0	A_64_P007244	A_64_P007244	7669.13	254.767	1.123464e+004	1.123538e+003	10791	47	1.109498e+001	0	0	0	0	0	0	10814.9	1	1	44.4243	46.2069
DATA	889	11	39	0	0	A_42_P477625	NM_001108719	7694.44	255.308	1.031397e+004	1.031477e+003	9919	38.5	1.000948e+001	0	0	0	0	0	0	9957.91	1	1	52.9257	40.5
DATA	890	11	40	0	0	A_64_P153091	XM_341223	7720	255.191	2.117390e+003	2.121263e+002	2151	39.5	8.919575e+000	0	0	0	0	0	0	2049.93	1	1	46.8651	40.3235
DATA	891	11	41	0	0	A_64_P016347	NM_130819	7745.22	255.097	1.282930e+001	1.278629e+001	108.5	43	9.875856e+000	0	0	0	0	0	0	4.08344	0	0	47.5395	42.8056
DATA	892	11	42	0	0	A_42_P495598	NM_001014026	7770.58	255.427	1.536880e+001	1.284091e+001	120.5	41	8.866572e+000	0	0	0	0	0	0	14.953	1	0	57.5363	41.0667
DATA	893	11	43	0	0	A_42_P759043	NM_001134509	7796	255.455	1.686119e+003	1.690910e+002	1683	46.5	1.268629e+001	0	0	0	0	0	0	1644.15	1	1	55.8519	48.9722
DATA	894	11	44	0	0	A_64_P071595	XM_002728361	7821.43	255.613	2.470121e+001	1.293243e+001	129.5	41	1.072792e+001	0	0	0	0	0	0	24.1357	1	0	50.7771	43.3704
DATA	895	11	45	0	0	A_42_P780882	NM_001008511	7847	254.774	8.934965e+003	8.935863e+002	8797	43	8.723759e+000	0	0	0	0	0	0	8746.29	1	1	45.4864	44.1944
DATA	896	11	46	0	0	A_64_P044420	NM_001134983	7872.23	255.246	1.798696e+002	2.198975e+001	281	44	8.600325e+000	0	0	0	0	0	0	176.37	1	1	45.1352	43.9677
DATA	897	11	47	0	0	A_64_P000596	NM_001025732	7897.82	255.347	8.767348e+003	8.768258e+002	8645	39	7.152294e+000	0	0	0	0	0	0	8609.79	1	1	47.5395	39.697
DATA	898	11	48	0	0	A_44_P468873	ENSRNOT00000015693	7923	255.455	9.156954e+001	1.558737e+001	194.5	42	1.162712e+001	0	0	0	0	0	0	90.042	1	1	55.8519	42.24
DATA	900	11	50	0	0	A_42_P727022	NM_001107076	7973.75	255.411	1.086227e+004	1.086300e+003	10564	42	7.876197e+000	0	0	0	0	0	0	10703.4	1	1	48.5334	41.9655
DATA	901	11	51	0	0	A_64_P135604	NM_001009641	7999.13	255.526	8.014561e+003	8.015548e+002	7885	39	7.596295e+000	0	0	0	0	0	0	7903.57	1	1	50.1463	41
DATA	902	11	52	0	0	A_42_P813939	NM_001108741	8024.56	255.479	9.372656e+003	9.373499e+002	9311.5	34.5	7.259641e+000	0	0	0	0	0	0	9248.38	1	1	48.2044	37.0357
DATA	903	11	53	0	0	A_64_P052494	A_64_P052494	8049.89	255.5	1.261419e+001	1.259957e+001	114.5	45	9.283581e+000	0	0	0	0	0	0	9.19507	0	0	65	45.1429
DATA	904	11	54	0	0	A_44_P323678	NM_001107651	8075.31	255.426	3.994644e+001	1.318193e+001	143	42	8.492978e+000	0	0	0	0	0	0	39.4428	1	0	46.8651	41.4545
DATA	905	11	55	0	0	A_44_P435764	NM_001191810	8100.58	255.573	1.261023e+001	1.257505e+001	112	40	8.697573e+000	0	0	0	0	0	0	5.83559	0	0	57.5363	39.1724
DATA	906	11	56	0	0	A_42_P688320	NM_001108569	8126.11	255.5	6.817528e+002	6.932306e+001	793.5	46	1.620461e+001	0	0	0	0	0	0	673.131	1	1	56.9804	47.5484
DATA	907	11	57	0	0	A_42_P798500	NM_001014023	8152	255.648	3.081136e+003	3.083697e+002	3082	47.5	1.037672e+001	0	0	0	0	0	0	3041.31	1	1	47.2035	46.4688
DATA	908	11	58	0	0	A_44_P279083	NM_133401	8177.06	255.768	1.072927e+003	1.080268e+002	1169.5	41	1.000000e+001	0	0	0	0	0	0	1058.58	1	1	46.5243	42.5
DATA	909	11	59	0	0	A_64_P129850	NM_001002855	8202.59	255.534	4.037698e+001	1.321201e+001	144	38	9.102067e+000	0	0	0	0	0	0	39.8114	1	0	48.8603	37.619
DATA	910	11	60	0	0	A_64_P029468	NM_001105784	8227.58	255.573	5.241566e+001	1.363735e+001	159	39	8.120854e+000	0	0	0	0	0	0	51.6409	1	0	57.5363	39.3448
DATA	911	11	61	0	0	A_43_P18571	NM_001013965	8253	255.545	2.700043e+002	2.979655e+001	370.5	40	7.843659e+000	0	0	0	0	0	0	265.755	1	1	55.8519	40.1667
DATA	912	11	62	0	1	ERCC-00104_60	ERCC-00104_60	8278.3	255.87	2.422592e+001	1.284656e+001	129.5	35	6.902454e+000	0	0	0	0	0	0	23.8181	1	0	46.1809	36.5185
DATA	913	11	63	0	0	A_44_P653701	NM_001106536	8303.94	255.696	1.842292e+002	2.233810e+001	287	39.5	8.569575e+000	0	0	0	0	0	0	180.889	1	1	46.1809	38.6765
DATA	914	11	64	0	0	A_64_P093593	NM_001107077	8329.37	255.63	2.193995e+003	2.197639e+002	2248.5	37.5	7.094226e+000	0	0	0	0	0	0	2151.05	1	1	48.2044	39.4286
DATA	915	11	65	0	0	A_44_P1034793	NM_001008300	8354.87	255.771	1.903672e+003	1.907885e+002	1935	39	8.915640e+000	0	0	0	0	0	0	1863.39	1	1	46.5243	38.6364
DATA	916	11	66	0	0	A_42_P768355	NM_057130	8380.06	255.519	1.033444e+003	1.041212e+002	1118	39	6.830375e+000	0	0	0	0	0	0	1009.78	1	1	49.5074	38.3667
DATA	917	11	67	0	0	A_44_P714581	NM_001107480	8405.36	255.598	8.807136e+003	8.808054e+002	8636	40.5	7.707277e+000	0	0	0	0	0	0	8588.91	1	1	52.3208	39.9286
DATA	918	11	68	0	0	A_64_P084521	NM_019351	8431.09	255.896	1.299429e+004	1.299491e+003	12651	37.5	7.124912e+000	0	0	0	0	0	0	12645.8	1	1	46.8651	38.1667
DATA	919	11	69	0	0	A_42_P562625	NM_131913	8456.5	255.742	3.228650e+003	3.231176e+002	3284	34.5	8.226238e+000	0	0	0	0	0	0	3135	1	1	46.5243	36.3636
DATA	920	11	70	0	0	A_42_P468662	NM_001108886	8481.65	255.88	5.084285e+003	5.085897e+002	4940	38	9.240851e+000	0	0	0	0	0	0	4925.22	1	1	48.8603	39.32
DATA	921	11	71	0	0	A_42_P778587	NM_001135767	8507	256	8.644641e+004	8.644650e+003	83588	38	9.217941e+000	0	0	0	0	0	0	83532	1	1	54.9904	39.5517
DATA	922	11	72	0	0	A_64_P139957	NM_001008525	8532.64	255.781	2.601565e+004	2.601597e+003	25075.5	40	8.621916e+000	0	0	0	0	0	0	25070.7	1	1	44.7812	41.1379
DATA	923	11	73	0	0	A_44_P318402	NM_001000187	8557.71	255.853	1.684876e+002	2.122416e+001	266	40.5	8.135015e+000	0	0	0	0	0	0	161.921	1	1	45.835	40.4615
DATA	924	11	74	0	0	A_64_P090359	NM_001033565	8583.23	255.788	1.299545e+001	1.297627e+001	119.5	42	8.874467e+000	0	0	0	0	0	0	8.64428	0	0	45.835	40.5517
DATA	925	11	75	0	0	A_43_P17778	NM_001134991	8608.5	256	4.264318e+001	1.366644e+001	153	44	1.094717e+001	0	0	0	0	0	0	40.737	1	0	48.5334	42.0882
DATA	926	11	76	0	0	A_64_P093176	A_64_P093176	8634	256	8.149196e+001	1.536479e+001	187	41	1.033091e+001	0	0	0	0	0	0	77.601	1	1	54.9904	40.9143
DATA	927	11	77	0	0	A_64_P100123	NM_182821	8659.84	255.897	1.697614e+004	1.697664e+003	15896	42	8.436990e+000	0	0	0	0	0	0	16111.2	1	1	46.5243	40.871
DATA	928	11	78	0	0	A_44_P426660	NM_001135717	8684.91	256.104	2.932069e+001	1.343731e+001	139	41	6.391535e+000	0	0	0	0	0	0	27.7336	1	0	46.8651	39.1
DATA	929	11	79	0	0	A_42_P696084	NM_031022	8710.44	256.028	3.630058e+003	3.632443e+002	3645	36	9.231385e+000	0	0	0	1	0	0	3421.4	1	1	48.2044	37.4615
DATA	930	11	80	66	1	DarkCorner	DarkCorner	8735.5	256.352	1.325867e+001	1.320706e+001	84	37	8.083702e+000	0	0	0	0	0	0	-26.6692	0	0	57.5363	36.7097
DATA	931	11	81	66	1	DarkCorner	DarkCorner	8760.91	256.386	1.330824e+001	1.325644e+001	77.5	40	1.008187e+001	0	0	0	0	0	0	-32.9036	0	0	57.259	39.5405
DATA	932	11	82	66	1	DarkCorner	DarkCorner	8786.33	256.086	1.335970e+001	1.330770e+001	86	39	9.919027e+000	0	0	0	0	0	0	-27.1699	0	0	46.8651	39.25
DATA	933	11	83	66	1	DarkCorner	DarkCorner	8811.6	256.056	1.341196e+001	1.335976e+001	87.5	38.5	8.343281e+000	0	0	0	0	0	0	-26.2303	0	0	48.2044	40.1
DATA	934	11	84	66	1	DarkCorner	DarkCorner	8837	256.455	1.346527e+001	1.341287e+001	84	44	9.618652e+000	0	0	0	0	0	0	-26.5231	0	0	55.8519	43.0385
DATA	935	11	85	66	1	DarkCorner	DarkCorner	8862.5	256.352	1.352077e+001	1.346815e+001	92	35.5	7.873150e+000	0	0	0	0	0	0	-24.0265	0	0	57.5363	35.5
DATA	936	12	1	66	1	DarkCorner	DarkCorner	6742.28	261.76	1.580414e+001	1.574263e+001	95.5	40	1.022311e+001	0	0	0	0	0	0	-15.6358	0	0	49.1849	39.6486
DATA	937	12	2	66	1	DarkCorner	DarkCorner	6767.75	261.849	1.569228e+001	1.563120e+001	94	43	1.168042e+001	0	0	0	0	0	0	-16.2107	0	0	47.8731	44.9677
DATA	938	12	3	66	1	DarkCorner	DarkCorner	6793	261.545	1.558371e+001	1.552306e+001	96	41	8.307080e+000	0	0	0	0	0	0	-13.1058	0	0	55.8519	41.8485
DATA	939	12	4	66	1	DarkCorner	DarkCorner	6818.08	261.904	1.547521e+001	1.541498e+001	93	41	8.397224e+000	0	0	0	0	0	0	-17.9068	0	0	46.8651	42.8235
DATA	940	12	5	66	1	DarkCorner	DarkCorner	6843.58	261.573	1.536818e+001	1.530836e+001	96	44	1.076740e+001	0	0	0	0	0	0	-13.5477	0	0	57.5363	45.2973
DATA	941	12	6	0	0	A_64_P118227	XM_002728056	6869.23	261.822	5.375804e+001	1.612357e+001	153	41	9.833124e+000	0	0	0	0	0	0	43.8655	1	0	47.8731	41.0968
DATA	942	12	7	0	0	A_64_P051317	NM_130425	6894.64	262.3	2.685370e+002	3.080583e+001	326	41	1.132299e+001	0	0	0	0	0	0	220.651	1	1	47.5395	42.2857
DATA	943	12	8	0	0	A_42_P756350	NM_021772	6920	261.545	4.777675e+002	5.007465e+001	503	44	9.916406e+000	0	0	0	1	0	0	395.202	1	1	55.8519	44.7059
DATA	944	12	9	0	0	A_42_P816479	NM_022278	6945.36	262.129	2.411206e+004	2.411252e+003	19757	45.5	1.011503e+001	0	0	0	1	0	0	20082	1	1	46.8651	45.0769
DATA	945	12	10	0	0	A_64_P351634	NM_001029901	6970.57	262.284	5.881570e+002	6.064776e+001	598	41	1.032745e+001	0	0	0	0	0	0	493.125	1	1	46.5243	41.7391
DATA	946	12	11	0	0	A_64_P136597	A_64_P136597	6996.39	261.931	6.901648e+002	7.056373e+001	694	42.5	9.666598e+000	0	0	0	0	0	0	582.522	1	1	53.8203	43.9643
DATA	947	12	12	0	0	A_64_P052017	ENSRNOT00000033592	7021.13	261.971	4.661511e+001	1.532851e+001	144	42	1.273912e+001	0	0	0	0	0	0	39.5959	1	0	46.8651	43.2162
DATA	948	12	13	0	0	A_44_P444485	TC589779	7047	261.797	6.678539e+003	6.680114e+002	5708	41.5	1.067749e+001	0	0	0	0	0	0	5710.12	1	1	46.8651	40.6389
DATA	949	12	14	0	0	A_44_P147373	XM_226249	7072.44	261.972	6.468744e+003	6.470350e+002	5504	44.5	1.235241e+001	0	0	0	0	0	0	5566.19	1	1	48.2044	44.7143
DATA	950	12	15	0	0	A_64_P059939	NM_001134540	7097.56	262	5.905697e+004	5.905714e+003	51294	45	8.228375e+000	0	0	0	0	0	0	51132.8	1	1	49.8279	42.8846
DATA	951	12	16	0	0	A_42_P637279	NM_012743	7123.07	262.309	3.239655e+001	1.460100e+001	136.5	40	8.863775e+000	0	0	0	0	0	0	28.2248	1	0	45.835	41.069
DATA	952	12	17	0	0	A_42_P771570	XM_001080365	7148.19	262.025	8.093733e+002	8.216537e+001	819	37	5.812207e+000	0	0	0	1	0	0	709.353	1	1	49.1849	36.3214
DATA	953	12	18	0	0	A_43_P12942	NM_053817	7173.87	261.944	2.235307e+004	2.235352e+003	19152	41	5.760342e+000	0	0	0	0	0	0	19708.6	1	1	46.8651	40.6923
DATA	954	12	19	0	0	A_64_P053307	NM_001191900	7199.5	262	9.904416e+001	1.713743e+001	193.5	42.5	8.805129e+000	0	0	0	0	0	0	87.8421	1	1	54.1152	42.5
DATA	955	12	20	0	0	A_42_P595630	NM_001013189	7224.74	262.42	1.485676e+004	1.485741e+003	13392	46.5	9.114858e+000	0	0	0	1	0	0	13252	1	1	46.8651	44.625
DATA	956	12	21	0	0	A_64_P154760	A_64_P154760	7250.09	262.386	1.336042e+003	1.343179e+002	1328	47	1.041585e+001	0	0	0	0	0	0	1198.38	1	1	57.259	47.5185
DATA	957	12	22	0	0	A_42_P764359	NM_145086	7275.7	261.836	8.558111e+003	8.559216e+002	7659	42	1.071338e+001	0	0	0	1	0	0	7718.18	1	1	45.835	44.5357
DATA	958	12	23	0	0	A_43_P10405	NM_001109257	7300.63	262.404	1.238203e+002	1.845222e+001	223	44.5	9.496816e+000	0	0	0	0	0	0	112.26	1	1	57.8122	44.4375
DATA	959	12	24	0	0	A_44_P269950	ENSRNOT00000014054	7326.42	262.427	8.239956e+001	1.590926e+001	182	39.5	1.189371e+001	0	0	0	0	0	0	75.1013	1	1	57.5363	40.8571
DATA	960	12	25	0	0	A_44_P160763	NM_001106513	7351.58	262.427	9.356888e+002	9.454364e+001	961	34.5	9.684049e+000	0	0	0	0	0	0	857.09	1	1	57.5363	37.0417
DATA	961	12	26	0	0	A_64_P127678	NM_001008553	7377	262.455	1.058528e+003	1.067070e+002	1087	36	9.156054e+000	0	0	0	0	0	0	974.387	1	1	55.8519	35.8
DATA	962	12	27	0	0	A_42_P684885	NM_133517	7402.42	262.427	1.353092e+001	1.347887e+001	119	36	7.058246e+000	0	0	0	0	0	0	12.5148	1	0	57.5363	36.4167
DATA	963	12	28	0	0	A_64_P102708	NM_001034149	7427.86	262.405	1.289546e+002	1.856039e+001	226.5	37	7.619867e+000	0	0	0	0	0	0	119.823	1	1	50.1463	38.9355
DATA	964	12	29	0	0	A_42_P547629	NM_001106718	7453.36	262.13	8.979043e+002	9.076858e+001	940	40	1.112683e+001	0	0	0	0	0	0	838.047	1	1	46.8651	42.1613
DATA	965	12	30	0	0	A_42_P522285	NM_001044263	7478.86	262.278	1.170499e+003	1.177955e+002	1156.5	38	9.681886e+000	0	0	0	0	0	0	1097.22	1	1	47.8731	39.1034
DATA	966	12	31	0	0	A_64_P164423	NM_057193	7504	262.455	8.690563e+001	1.578534e+001	191.5	40	1.008246e+001	0	0	0	0	0	0	81.8015	1	1	55.8519	39.4516
DATA	967	12	32	0	0	A_44_P256143	NM_001047917	7529.42	262.427	5.225469e+002	5.387785e+001	596	43	1.090240e+001	0	0	0	0	0	0	493.824	1	1	57.5363	40.5833
DATA	968	12	33	0	0	A_44_P727294	NM_001160314	7554.75	262.644	6.535392e+003	6.536700e+002	6108	46	1.172112e+001	0	0	0	0	0	0	6199.91	1	1	48.5334	45.6667
DATA	969	12	34	0	0	A_64_P108404	NM_001000092	7580.33	262.5	1.034065e+002	1.663214e+001	207	39	1.065989e+001	0	0	0	0	0	0	98.46	1	1	57.5363	39.7667
DATA	970	12	35	0	0	A_44_P520829	NM_001108777	7605.5	262.5	2.788933e+003	2.791953e+002	2697.5	39	1.270047e+001	0	0	0	0	0	0	2664.75	1	1	49.1849	41.9259
DATA	971	12	36	0	0	A_44_P229677	NM_001014221	7630.89	262.648	2.116916e+003	2.120867e+002	2124.5	39	8.322876e+000	0	0	0	0	0	0	2029.43	1	1	47.8731	40.7027
DATA	972	12	37	0	0	A_64_P126215	A_64_P126215	7656.5	262.5	1.294780e+001	1.290311e+001	110	40.5	9.810621e+000	0	0	0	0	0	0	3.68891	0	0	57.5363	41.6
DATA	973	12	38	0	0	A_64_P090035	A_64_P090035	7681.94	262.686	9.482437e+003	9.483309e+002	9257.5	39	9.558967e+000	0	0	0	0	0	0	9146.93	1	1	46.8651	40.5769
DATA	974	12	39	0	0	A_64_P089330	ENSRNOT00000012374	7707.18	262.361	4.884651e+002	5.050159e+001	585	39	5.885191e+000	0	0	0	0	0	0	472.492	1	1	47.8731	38.2759
DATA	975	12	40	0	0	A_44_P454429	NM_012712	7732.32	262.652	2.316635e+002	2.646213e+001	340	39	9.084385e+000	0	0	0	0	0	0	224.68	1	1	45.835	39.0571
DATA	976	12	41	0	1	ERCC-00144_60	ERCC-00144_60	7757.89	262.453	2.488496e+001	1.299810e+001	133	41	9.171384e+000	0	0	0	0	0	0	24.1946	1	0	48.8603	40.0571
DATA	977	12	42	0	0	A_42_P759843	XR_086347	7783.56	262.521	4.120642e+003	4.122607e+002	4149	44	8.816688e+000	0	0	0	0	0	0	4015.63	1	1	48.2044	42.6552
DATA	978	12	43	0	0	A_43_P14264	NM_053653	7808.58	262.573	2.369224e+003	2.372626e+002	2370	41	1.285923e+001	0	0	0	0	0	0	2313.66	1	1	57.5363	44.8788
DATA	979	12	44	0	0	A_64_P011223	NM_024353	7834.11	262.5	1.237664e+003	1.244140e+002	1372	43	1.268092e+001	0	0	0	0	0	0	1210.99	1	1	56.9804	45.7105
DATA	980	12	45	0	0	A_42_P701169	NM_001109572	7859.68	262.382	3.533963e+003	3.536228e+002	3582	44.5	8.747282e+000	0	0	0	0	0	0	3463.9	1	1	46.5243	43.8421
DATA	981	12	46	0	0	A_64_P143307	NM_001014106	7884.67	262.5	1.373546e+003	1.379345e+002	1456	44	7.473286e+000	0	0	0	0	0	0	1348.42	1	1	57.5363	43.4167
DATA	982	12	47	0	0	A_44_P480636	NM_001005381	7910.59	262.618	1.200056e+003	1.206670e+002	1283	38.5	7.677843e+000	0	0	0	0	0	0	1179.8	1	1	46.8651	38.4167
DATA	983	12	48	0	0	A_64_P163564	ENSRNOT00000010609	7935.55	262.836	1.354401e+002	1.849963e+001	234	38	1.134063e+001	0	0	0	0	0	0	133.315	1	1	48.2044	40.88
DATA	984	12	49	0	0	A_42_P774028	NM_001017447	7961	262.545	6.105461e+003	6.106759e+002	5961	41.5	8.967951e+000	0	0	0	0	0	0	6015.85	1	1	55.8519	41.3
DATA	985	12	50	0	0	A_43_P20110	ENSRNOT00000050558	7986.5	262.648	1.077762e+002	1.656353e+001	211.5	41	8.887897e+000	0	0	0	0	0	0	106.287	1	1	57.5363	42.4286
DATA	986	12	51	0	0	A_44_P552865	NM_001170399	8011.58	262.573	1.764874e+003	1.769344e+002	1821	38.5	1.077268e+001	0	0	0	0	0	0	1741.66	1	1	57.5363	41.1333
DATA	987	12	52	0	0	A_43_P17428	NM_001012189	8037.21	263.015	1.372227e+003	1.377965e+002	1451.5	38.5	6.599964e+000	0	0	0	0	0	0	1354.9	1	1	46.1809	38.3214
DATA	988	12	53	0	0	A_64_P146222	TC633165	8062.5	262.648	1.354603e+004	1.354662e+003	13436	45	1.073163e+001	0	0	0	0	0	0	13379.2	1	1	57.5363	45.9333
DATA	989	12	54	0	0	A_64_P054856	NM_001135894	8088.13	262.779	8.297999e+002	8.392462e+001	930.5	41	1.081569e+001	0	0	0	0	0	0	819.709	1	1	46.1809	41.3333
DATA	990	12	55	0	0	A_64_P154982	ENSRNOT00000018118	8113.56	262.792	1.832296e+004	1.832339e+003	17967.5	40	9.798967e+000	0	0	0	0	0	0	18099.7	1	1	49.1849	39.7391
DATA	991	12	56	0	0	A_42_P726363	NM_031536	8138.5	263	2.460421e+001	1.279773e+001	134	47	1.262670e+001	0	0	0	0	0	0	24.3	1	0	54.1152	46.9143
DATA	992	12	57	0	0	A_64_P139685	A_64_P139685	8164.04	262.928	2.050785e+001	1.272998e+001	125	41.5	9.755158e+000	0	0	0	0	0	0	20.2467	1	0	46.8651	42.4412
DATA	993	12	58	0	0	A_64_P114104	NM_001034136	8190.09	262.896	8.839268e+003	8.840162e+002	8841	36.5	9.177958e+000	0	0	0	0	0	0	8721.82	1	1	46.8651	37.2222
DATA	994	12	59	0	0	A_42_P480273	A_42_P480273	8215.18	263	1.552824e+004	1.552874e+003	15177	38	1.046756e+001	0	0	0	0	0	0	15311.2	1	1	51.4001	39.6452
DATA	995	12	60	0	0	A_64_P004344	ENSRNOT00000047696	8240.64	263.13	1.472302e+004	1.472356e+003	14456	41	8.699219e+000	0	0	0	0	0	0	14504.5	1	1	46.8651	40.4688
DATA	996	12	61	0	0	A_42_P723584	NM_001109099	8265.91	262.896	6.383926e+003	6.385170e+002	6310	39	8.002314e+000	0	0	0	0	0	0	6282.51	1	1	46.8651	39.037
DATA	997	12	62	0	0	A_64_P114813	A_64_P114813	8291.25	263.029	1.266844e+001	1.262154e+001	106	36	9.480818e+000	0	0	0	0	0	0	2.42485	0	0	46.1809	37.4118
DATA	998	12	63	0	0	A_64_P034551	NM_053818	8316.75	263	3.223424e+002	3.462268e+001	424.5	37	7.590906e+000	0	0	0	0	0	0	316.402	1	1	49.1849	38.7143
DATA	999	12	64	0	0	A_42_P492976	NM_001126099	8342.23	262.703	1.745786e+003	1.750368e+002	1788	41	6.239103e+000	0	0	0	0	0	0	1710.94	1	1	45.1352	39.9063
DATA	1000	12	65	0	0	A_64_P141799	NM_001025709	8367.63	263	4.008862e+003	4.010867e+002	4049	37	7.942098e+000	0	0	0	0	0	0	3922.26	1	1	48.5334	36.6667
DATA	1001	12	66	0	0	A_44_P337088	NM_133609	8392.91	263.104	2.214301e+003	2.217940e+002	2249	41.5	7.184852e+000	0	0	0	0	0	0	2162.49	1	1	46.8651	41.1176
DATA	1002	12	67	0	0	A_64_P137961	A_64_P137961	8418.06	262.619	1.763160e+002	2.174481e+001	285.5	40	7.482813e+000	0	0	0	0	0	0	171.844	1	1	44.0646	40.2973
DATA	1003	12	68	0	0	A_64_P053822	ENSRNOT00000028268	8443.32	262.901	9.437125e+001	1.586542e+001	195	37	8.423957e+000	0	0	0	0	0	0	91.7828	1	1	47.5395	37.9655
DATA	1004	12	69	0	0	A_42_P484456	NM_001106601	8469.09	262.672	6.883438e+003	6.884625e+002	6739.5	39	1.200615e+001	0	0	0	0	0	0	6678.95	1	1	45.1352	41.381
DATA	1005	12	70	0	0	A_44_P508632	NM_001107594	8494.42	263.427	1.286408e+001	1.281686e+001	108.5	37	9.102831e+000	0	0	0	0	0	0	2.61562	0	0	57.5363	37.3077
DATA	1006	12	71	0	0	A_64_P080598	NM_001047865	8519.58	263.427	6.712145e+001	1.449460e+001	173	40.5	1.064451e+001	0	0	0	0	0	0	64.8064	1	1	65	42.75
DATA	1007	12	72	0	0	A_64_P144243	A_64_P144243	8545	263.455	2.116241e+001	1.305443e+001	126.5	41	8.256360e+000	0	0	0	0	0	0	20.3771	1	0	55.8519	41.1034
DATA	1008	12	73	0	0	A_44_P479917	NM_030864	8570.42	262.922	7.292673e+001	1.483524e+001	179	41.5	7.263475e+000	0	0	0	0	0	0	70.0178	1	1	44.4243	41.125
DATA	1009	12	74	0	0	A_44_P974524	NM_001025764	8595.78	262.846	4.262909e+001	1.364079e+001	148.5	39	1.056170e+001	0	0	0	0	0	0	40.8069	1	0	45.835	40.5429
DATA	1010	12	75	0	0	A_42_P522899	NM_021578	8621.54	263.06	3.898878e+002	4.109840e+001	482	40	1.107875e+001	0	0	0	0	0	0	372.055	1	1	45.835	39.6364
DATA	1011	12	76	0	0	A_64_P069892	NM_019201	8646.77	263.116	4.495755e+004	4.495774e+003	42077	42	8.828544e+000	0	0	0	0	0	0	42764.3	1	1	46.5243	40.5455
DATA	1012	12	77	0	0	A_44_P415199	NM_001108748	8672	263.455	8.070326e+001	1.537178e+001	183.5	42	1.117466e+001	0	0	0	0	0	0	76.5138	1	1	65	44.1613
DATA	1013	12	78	0	0	A_64_P034610	NM_022622	8697.5	263.5	3.270602e+002	3.524251e+001	420	36	8.466207e+000	0	0	0	0	0	0	309.01	1	1	57.5363	38.52
DATA	1014	12	79	0	0	A_42_P473828	ENSRNOT00000035309	8723.14	263.278	6.539440e+003	6.540767e+002	6166.5	36	8.040773e+000	0	0	0	0	0	0	6156.26	1	1	47.8731	37.0333
DATA	1015	12	80	66	1	DarkCorner	DarkCorner	8748.56	263.057	1.327607e+001	1.322440e+001	82	36	8.966728e+000	0	0	0	0	0	0	-28.7919	0	0	47.8731	37.2813
DATA	1016	12	81	66	1	DarkCorner	DarkCorner	8773.54	263.714	1.332448e+001	1.327262e+001	82.5	36.5	8.429559e+000	0	0	0	0	0	0	-26.6173	0	0	46.8651	36.6667
DATA	1017	12	82	66	1	DarkCorner	DarkCorner	8799.11	263.797	1.337613e+001	1.332407e+001	83	37	7.103829e+000	0	0	0	0	0	0	-30.6719	0	0	47.8731	37.8148
DATA	1018	12	83	66	1	DarkCorner	DarkCorner	8824.5	263.5	1.342930e+001	1.337703e+001	87	39	1.133459e+001	0	0	0	0	0	0	-28.3104	0	0	57.5363	40.3704
DATA	1019	12	84	66	1	DarkCorner	DarkCorner	8850.06	263.853	1.348329e+001	1.343081e+001	90.5	35	6.632115e+000	0	0	0	0	0	0	-23.6278	0	0	46.8651	35.4194
DATA	1020	12	85	66	1	DarkCorner	DarkCorner	8875.46	263.25	1.353952e+001	1.348682e+001	94	33	8.285927e+000	0	0	0	0	1	0	-20.2332	0	0	46.8651	33.4757
DATA	1021	13	1	66	1	DarkCorner	DarkCorner	6729.42	269.231	1.583794e+001	1.577630e+001	93.5	35	9.050901e+000	0	0	0	0	0	0	-19.1965	0	0	49.5074	36.0986
DATA	1022	13	2	66	1	DarkCorner	DarkCorner	6754.68	269.303	1.572718e+001	1.566597e+001	91	40	1.175052e+001	0	0	0	0	0	0	-19.3644	0	0	48.5334	41.1667
DATA	1023	13	3	66	1	DarkCorner	DarkCorner	6780.15	269.181	1.561719e+001	1.555641e+001	86.5	41	9.554333e+000	0	0	0	0	0	0	-20.1708	0	0	47.5395	42.2162
DATA	1024	13	4	66	1	DarkCorner	DarkCorner	6805.5	269	1.550907e+001	1.544871e+001	90	41	8.545360e+000	0	0	0	0	0	0	-18.3513	0	0	65	41.5938
DATA	1025	13	5	66	1	DarkCorner	DarkCorner	6831.03	269.043	1.540083e+001	1.534089e+001	93.5	40	9.436627e+000	0	0	0	0	0	0	-15.9455	0	0	46.8651	41.9487
DATA	1026	13	6	0	0	A_64_P029912	NM_001109143	6856.5	269.352	2.856746e+002	3.237553e+001	342	45	1.102440e+001	0	0	0	0	0	0	232.6	1	1	57.5363	44.9118
DATA	1027	13	7	0	0	A_42_P574731	NM_012948	6882.06	269.232	7.590883e+003	7.592391e+002	6144	40.5	1.006135e+001	0	0	0	1	0	0	6223.33	1	1	46.5243	42.2647
DATA	1028	13	8	0	0	A_44_P137448	NM_017043	6907.18	269.347	1.155430e+003	1.165161e+002	1037	44	9.960901e+000	0	0	0	0	0	0	953.698	1	1	47.5395	43.2333
DATA	1029	13	9	0	0	A_42_P770614	NM_001013235	6932.63	269.36	5.733983e+004	5.734002e+003	47425	44	9.400899e+000	0	0	0	1	0	0	47650.1	1	1	48.8603	44.4242
DATA	1030	13	10	0	0	A_42_P785419	NM_199501	6958.09	269.386	5.824458e+002	6.010197e+001	588	41	8.365655e+000	0	0	0	0	0	0	487.279	1	1	57.259	41.5652
DATA	1031	13	11	0	0	A_42_P581043	TC622715	6983.37	269.64	1.551486e+004	1.551556e+003	12695	43.5	1.238706e+001	0	0	0	1	0	0	13066.2	1	1	48.8603	47.4286
DATA	1032	13	12	0	0	A_64_P098532	NM_001029928	7008.58	269.427	5.460943e+001	1.561914e+001	155.5	42	8.781137e+000	0	0	0	0	0	0	46.2887	1	0	57.5363	43.4138
DATA	1033	13	13	0	0	A_64_P090758	A_64_P090758	7034.42	269.427	1.016777e+003	1.027117e+002	965.5	42	1.132876e+001	0	0	0	0	0	0	867.533	1	1	57.5363	41.7838
DATA	1034	13	14	0	0	A_43_P12079	NM_021583	7059.58	269.427	2.649118e+002	3.017402e+001	327	44	1.279709e+001	0	0	0	0	0	0	227.459	1	1	57.5363	45.4
DATA	1035	13	15	0	0	A_64_P001947	A_64_P001947	7085	269.455	5.067469e+001	1.522368e+001	153	44	8.634226e+000	0	0	0	0	0	0	43.7848	1	0	65	43.3704
DATA	1036	13	16	0	0	A_64_P064461	A_64_P064461	7110.42	269.427	6.412230e+001	1.564180e+001	165	42.5	9.041868e+000	0	0	0	0	0	0	55.7476	1	0	57.5363	42.3462
DATA	1037	13	17	0	0	A_42_P575398	NM_020538	7135.67	269.5	1.423640e+001	1.418099e+001	108	38	7.023149e+000	0	0	0	0	0	0	-0.137208	0	0	57.5363	38.7308
DATA	1038	13	18	0	0	A_42_P482623	NM_199463	7161.42	269.427	7.322415e+003	7.323771e+002	6531	40	9.092278e+000	0	0	0	0	0	0	6443.53	1	1	57.5363	40.8519
DATA	1039	13	19	0	0	A_42_P738431	NM_019175	7186.5	269.5	4.671169e+003	4.673271e+002	4111	42	8.640256e+000	0	0	0	0	0	0	4134.39	1	1	57.5363	42.3667
DATA	1040	13	20	0	0	A_44_P1027780	ENSRNOT00000065815	7212	269.455	1.025135e+002	1.729846e+001	200	42	8.979540e+000	0	0	0	0	0	0	91.2574	1	1	55.8519	41.9189
DATA	1041	13	21	0	0	A_42_P479802	NM_053679	7237.5	269.5	3.778373e+003	3.780913e+002	3500	48	9.827283e+000	0	0	0	1	0	0	3382.55	1	1	57.5363	46.037
DATA	1042	13	22	0	0	A_44_P496624	NM_022302	7262.61	269.38	2.749604e+002	3.075595e+001	352	40	1.041491e+001	0	0	0	0	0	0	247.493	1	1	50.7771	42.5517
DATA	1043	13	23	0	0	A_42_P700753	FQ212883	7288.37	269.63	5.215185e+003	5.216986e+002	4720	46	1.023151e+001	0	0	0	0	0	0	4719.97	1	1	48.2044	44.6061
DATA	1044	13	24	0	0	A_44_P229299	NM_001100678	7313.5	269.674	1.917517e+003	1.922358e+002	1827.5	41	9.853175e+000	0	0	0	0	0	0	1744.45	1	1	52.9257	41.5333
DATA	1045	13	25	0	0	A_42_P728472	NM_001007600	7339.21	269.74	3.737907e+004	3.737932e+003	33624.5	37.5	1.151368e+001	0	0	0	0	0	0	34181.6	1	1	48.5334	39.75
DATA	1046	13	26	0	0	A_42_P488904	NM_001108947	7364.56	269.74	1.641013e+004	1.641069e+003	14720.5	36.5	7.713325e+000	0	0	0	1	0	0	15080.8	1	1	49.5074	35.8462
DATA	1047	13	27	0	0	A_42_P458494	NM_001034951	7389.5	269.847	3.555722e+002	3.801012e+001	440	37	2.114065e+002	0	0	1	0	1	0	328.32	1	1	47.8731	144.88
DATA	1048	13	28	0	0	A_64_P100331	ENSRNOT00000048614	7415.13	270.079	2.900157e+001	1.368078e+001	133.5	33	5.744405e+000	0	0	0	0	0	0	26.9059	1	0	47.8731	34.2917
DATA	1049	13	29	0	0	A_64_P113989	NM_181631	7440.62	269.62	2.150078e+004	2.150120e+003	19981.5	42.5	1.386805e+001	0	0	0	0	0	0	20036.9	1	1	47.8731	44.7857
DATA	1050	13	30	0	0	A_64_P042105	ENSRNOT00000061599	7465.89	269.5	1.122083e+002	1.736469e+001	211	42	9.552157e+000	0	0	0	0	0	0	105.023	1	1	56.9804	41.1429
DATA	1051	13	31	0	0	A_64_P044435	NM_001015020	7491.37	269.63	1.355859e+003	1.362266e+002	1367	39.5	9.651809e+000	0	0	0	0	0	0	1274.42	1	1	48.2044	39.25
DATA	1052	13	32	0	0	A_64_P149011	NM_031352	7516.88	269.616	5.697050e+003	5.698565e+002	5402	44	1.083818e+001	0	0	0	0	0	0	5376.69	1	1	48.5334	40.8846
DATA	1053	13	33	0	0	A_42_P580844	NM_019296	7542.33	269.493	4.901954e+002	5.073764e+001	565	45.5	1.142076e+001	0	0	0	0	0	0	464.434	1	1	49.1849	43.2857
DATA	1054	13	34	0	0	A_64_P052972	A_64_P052972	7567.27	269.932	4.862594e+002	5.034492e+001	579	44.5	1.059113e+001	0	0	0	0	0	0	462.413	1	1	48.2044	44.4583
DATA	1055	13	35	0	0	A_44_P454300	NM_001003979	7592.58	269.573	1.304822e+001	1.300161e+001	111	37.5	9.531069e+000	0	0	0	0	0	0	3.1418	0	0	57.5363	39.7857
DATA	1056	13	36	0	0	A_44_P149743	ENSRNOT00000005476	7618.42	269.573	5.330161e+001	1.400639e+001	160	38	7.721477e+000	0	0	0	0	0	0	51.0431	1	0	57.5363	39.6061
DATA	1057	13	37	0	0	A_42_P841017	NM_173309	7644	269.729	9.051784e+003	9.052705e+002	8578	40	8.342607e+000	0	0	0	0	0	0	8696.6	1	1	46.8651	40.8919
DATA	1058	13	38	0	0	A_44_P206844	NM_013074	7669.62	269.577	5.202470e+002	5.359313e+001	598.5	43	8.835048e+000	0	0	0	0	0	0	501.372	1	1	50.1463	41.4839
DATA	1059	13	39	0	0	A_64_P073400	NM_001000705	7694.5	269.648	1.415863e+002	1.910979e+001	248	40.5	9.100803e+000	0	0	0	0	0	0	136.837	1	1	57.5363	40.7692
DATA	1060	13	40	0	0	A_64_P066676	A_64_P066676	7719.75	269.955	4.403638e+001	1.353568e+001	149	39.5	6.866233e+000	0	0	0	0	0	0	42.6753	1	0	45.835	39.375
DATA	1061	13	41	0	0	A_44_P386965	NM_001134594	7744.84	269.912	2.778378e+001	1.306602e+001	132	40	8.290245e+000	0	0	0	0	0	0	26.9928	1	0	46.5243	40.3824
DATA	1062	13	42	0	0	A_64_P095895	NM_019338	7770.69	269.986	6.553938e+002	6.676545e+001	742	45	9.654250e+000	0	0	0	0	0	0	638.275	1	1	47.2035	45.2727
DATA	1063	13	43	1028	1	(+)E1A_r60_a22	E1A_r60_a22	7795.88	270	1.735347e+002	2.150939e+001	272	41	7.257625e+000	0	0	0	0	0	0	169.37	1	1	49.8279	41.1613
DATA	1064	13	44	0	0	A_42_P541625	NM_001126090	7821.63	270	4.347483e+004	4.347502e+003	41999	43	1.416487e+001	0	0	0	0	0	0	42518.3	1	1	48.5334	46.6667
DATA	1065	13	45	0	0	A_64_P033895	NM_001126084	7847	269.797	2.313759e+002	2.637452e+001	328.5	43	1.009447e+001	0	0	0	0	0	0	226.698	1	1	46.8651	43.5957
DATA	1066	13	46	0	0	A_64_P012546	NM_022300	7872.5	270	7.302565e+004	7.302576e+003	71165	44.5	6.570798e+000	0	0	0	0	0	0	71669.3	1	1	54.1152	45.1538
DATA	1067	13	47	0	0	A_42_P495598	NM_001014026	7897.56	270.028	1.266928e+001	1.267649e+001	115	40	8.055560e+000	0	0	0	0	0	0	11.7528	0	0	48.2044	41.2727
DATA	1068	13	48	0	0	A_42_P483463	NM_001130999	7922.9	270.084	8.692650e+003	8.693564e+002	8485	42	1.035248e+001	0	0	0	0	0	0	8554.85	1	1	50.7771	43.5926
DATA	1069	13	49	0	0	A_42_P575104	NM_153737	7948.69	269.986	6.228084e+002	6.354047e+001	694	37	9.504385e+000	0	0	0	0	0	0	613.632	1	1	47.2035	39.2222
DATA	1070	13	50	0	0	A_42_P461726	NM_133549	7973.85	270.164	6.022299e+001	1.394476e+001	165	43	7.442555e+000	0	0	0	0	0	0	59.3918	1	0	47.5395	42.0345
DATA	1071	13	51	0	0	A_64_P098688	A_64_P098688	7999.37	270.404	8.082806e+004	8.082816e+003	84816	44	1.133491e+001	0	0	0	0	0	0	79775.1	1	1	57.8122	46.1379
DATA	1072	13	52	0	0	A_64_P105797	A_64_P105797	8024.4	270.147	7.028337e+001	1.439300e+001	173	38.5	8.857356e+000	0	0	0	0	0	0	69.4072	1	1	48.8603	39.1765
DATA	1073	13	53	0	0	A_42_P545943	NM_019291	8050.09	270.104	1.954008e+004	1.954049e+003	19305	42	1.018753e+001	0	0	0	0	0	0	19304.5	1	1	46.8651	44
DATA	1074	13	54	0	0	A_44_P520045	NM_001001371	8075.24	269.794	1.486649e+002	1.945696e+001	252.5	45	1.191556e+001	0	0	0	0	0	0	146.905	1	1	46.1809	46.2258
DATA	1075	13	55	0	0	A_44_P306964	NM_001012184	8100.45	270.068	2.825858e+002	3.092059e+001	382.5	41	8.622258e+000	0	0	0	0	0	0	279.262	1	1	48.8603	40.48
DATA	1076	13	56	0	0	A_44_P156043	NM_001039012	8126.22	270.149	4.641003e+003	4.642700e+002	4708.5	39	9.466091e+000	0	0	0	0	0	0	4585.93	1	1	46.1809	39.0417
DATA	1077	13	57	0	0	A_64_P054686	TC585752	8151.79	270.125	2.332719e+004	2.332753e+003	22857	46	1.169920e+001	0	0	0	0	0	0	23043.7	1	1	47.5395	45.0606
DATA	1078	13	58	0	0	A_42_P575104	NM_153737	8176.67	270.5	6.362566e+002	6.485384e+001	711	41	1.150054e+001	0	0	0	0	0	0	628.256	1	1	57.5363	41.9355
DATA	1079	13	59	0	0	A_64_P142194	NM_053426	8202.5	270.295	7.336215e+003	7.337292e+002	7201.5	37	9.729826e+000	0	0	0	0	0	0	7239.26	1	1	50.4627	37.1481
DATA	1080	13	60	0	0	A_64_P043314	A_64_P043314	8227.73	270.392	1.656277e+002	2.079842e+001	263.5	42	1.113587e+001	0	0	0	0	0	0	163.31	1	1	48.5334	43.5152
DATA	1081	13	61	0	0	A_44_P684315	NM_001109104	8253.18	270.4	4.032141e+004	4.032161e+003	39877.5	40	9.098259e+000	0	0	0	0	0	0	39719	1	1	52.6241	39.2759
DATA	1082	13	62	0	0	A_64_P142620	NM_201417	8278.56	270.26	2.639797e+002	2.925351e+001	372.5	39	1.234989e+001	0	0	0	0	0	0	259.741	1	1	49.5074	41.6552
DATA	1083	13	63	0	0	A_42_P568419	NM_001011894	8303.93	270.268	8.607450e+003	8.608376e+002	8517.5	36	8.531208e+000	0	0	0	0	0	0	8458.32	1	1	47.5395	37.4286
DATA	1084	13	64	0	0	A_42_P519868	NM_053906	8329.24	270.394	4.399114e+002	4.577122e+001	546.5	41	6.921772e+000	0	0	0	0	0	0	431.668	1	1	47.5395	39.8286
DATA	1085	13	65	0	0	A_43_P12346	NM_022943	8354.94	270.386	7.955124e+002	8.055250e+001	881.5	41	7.174487e+000	0	0	0	0	0	0	779.335	1	1	47.2035	40.2647
DATA	1087	13	67	0	0	A_44_P556989	NM_012610	8405.46	270.583	3.634541e+002	3.850285e+001	450	41.5	8.811420e+000	0	0	0	0	0	0	354.765	1	1	48.2044	42.1875
DATA	1088	13	68	0	0	A_64_P113079	XM_218149	8430.87	270.429	1.278369e+001	1.273447e+001	106.5	38	7.318676e+000	0	0	0	0	0	0	1.1366	0	0	50.1463	38.2857
DATA	1089	13	69	0	0	A_64_P003937	NM_173111	8456.43	270.392	1.233095e+004	1.233161e+003	12045	40	1.074285e+001	0	0	0	0	0	0	11984.4	1	1	49.1849	40.1379
DATA	1090	13	70	0	0	A_42_P771337	NM_001012015	8481.5	270.5	1.358700e+003	1.364709e+002	1410.5	37	1.098909e+001	0	0	0	0	0	0	1317.45	1	1	57.5363	36.48
DATA	1091	13	71	0	0	A_44_P401035	A_44_P401035	8507	270.545	1.316256e+002	1.837693e+001	231.5	40	1.003381e+001	0	0	0	0	0	0	127.31	1	1	55.8519	41.9655
DATA	1092	13	72	0	0	A_42_P536292	NM_033359	8532.56	270.552	1.300515e+003	1.306856e+002	1355	37	8.150051e+000	0	0	0	0	0	0	1254.55	1	1	52.9257	39.44
DATA	1093	13	73	0	0	A_44_P128564	NM_001109121	8558.06	270.676	9.811930e+002	9.896287e+001	1047	37.5	8.548028e+000	0	0	0	0	0	0	943.891	1	1	47.2035	39.5714
DATA	1094	13	74	0	0	A_64_P069957	NM_173315	8583.33	270.5	2.044357e+001	1.309194e+001	125	38.5	9.407528e+000	0	0	0	0	0	0	19.6094	1	0	57.5363	38.8889
DATA	1095	13	75	0	0	A_44_P538691	NM_031772	8608.75	270.644	4.370435e+002	4.558839e+001	528.5	43	1.022089e+001	0	0	0	0	0	0	417.948	1	1	48.5334	41
DATA	1096	13	76	0	0	A_44_P499231	NM_001034148	8634	270.545	2.039277e+003	2.043424e+002	1936	38	1.095431e+001	0	0	0	0	0	0	1944.07	1	1	55.8519	39.0541
DATA	1097	13	77	0	0	A_64_P121489	XM_001065883	8659.42	270.573	1.310471e+001	1.306732e+001	112.5	42	7.109394e+000	0	0	0	0	0	0	5.66501	0	0	57.5363	40.75
DATA	1098	13	78	0	0	A_42_P507072	FQ213070	8685	270.69	1.914119e+004	1.914164e+003	18030	38.5	1.169360e+001	0	0	0	0	0	0	18126.5	1	1	51.7088	41.1333
DATA	1099	13	79	0	0	A_64_P120075	ENSRNOT00000027841	8710.54	270.676	3.124022e+002	3.389275e+001	401	36	8.340857e+000	0	0	0	0	0	0	294.805	1	1	48.8603	37.6452
DATA	1100	13	80	0	0	A_44_P1007362	NM_138864	8735.94	270.768	8.107852e+002	8.214461e+001	870	37.5	5.671161e+000	0	0	0	0	0	0	762.377	1	1	46.5243	37.9
DATA	1101	13	81	66	1	DarkCorner	DarkCorner	8761.06	270.769	1.329127e+001	1.323954e+001	81.5	32	7.209827e+000	0	0	0	0	1	0	-26.7347	0	0	49.5074	32.8667
DATA	1102	13	82	66	1	DarkCorner	DarkCorner	8786.42	270.573	1.334181e+001	1.328989e+001	85	36.5	8.945487e+000	0	0	0	0	0	0	-25.766	0	0	57.5363	37.25
DATA	1103	13	83	66	1	DarkCorner	DarkCorner	8811.43	270.766	1.339254e+001	1.334042e+001	88	38	1.222682e+001	0	0	0	0	0	0	-22.8955	0	0	49.5074	38.931
DATA	1104	13	84	66	1	DarkCorner	DarkCorner	8837.18	270.361	1.344691e+001	1.339458e+001	91.5	38	8.630316e+000	0	0	0	0	0	0	-23.9538	0	0	47.8731	37.6
DATA	1105	13	85	66	1	DarkCorner	DarkCorner	8862.8	270.557	1.350150e+001	1.344896e+001	90	35	9.830231e+000	0	0	0	0	0	0	-23.7309	0	0	46.5243	35.4419
DATA	1106	14	1	66	1	DarkCorner	DarkCorner	6741.86	276.414	1.576173e+001	1.570038e+001	99.5	33	9.213458e+000	0	0	0	0	0	0	-10.3285	0	0	47.2035	34.3659
DATA	1107	14	2	66	1	DarkCorner	DarkCorner	6767.36	276.563	1.565086e+001	1.558994e+001	90.5	41.5	9.243950e+000	0	0	0	0	0	0	-19.6161	0	0	50.7771	42.0313
DATA	1108	14	3	66	1	DarkCorner	DarkCorner	6793	276.455	1.554133e+001	1.548084e+001	96	41	1.086756e+001	0	0	0	0	0	0	-14.5869	0	0	55.8519	42.8056
DATA	1109	14	4	66	1	DarkCorner	DarkCorner	6818.12	277.031	1.543332e+001	1.537326e+001	96	40	8.976538e+000	0	0	0	0	0	0	-12.0056	0	0	45.835	40.5526
DATA	1110	14	5	66	1	DarkCorner	DarkCorner	6843.78	276.763	1.532675e+001	1.526710e+001	96.5	45	1.004364e+001	0	0	0	0	0	0	-13.1892	0	0	49.1849	44.2333
DATA	1111	14	6	0	0	A_64_P151415	NM_001191684	6869.33	276.5	1.542456e+003	1.549891e+002	1321	48	7.611536e+000	0	0	0	0	0	0	1261.79	1	1	57.5363	47
DATA	1112	14	7	0	0	A_42_P475623	NM_053394	6894.63	276.64	5.538748e+003	5.540795e+002	4518.5	43.5	1.317579e+001	0	0	0	0	0	0	4561.88	1	1	48.8603	46.1923
DATA	1113	14	8	0	0	A_44_P123636	ENSRNOT00000023689	6919.89	276.5	1.501770e+001	1.500795e+001	119	43.5	7.568981e+000	0	0	0	0	0	0	10.0165	0	0	56.9804	44.1842
DATA	1114	14	9	0	0	A_64_P135207	ENSRNOT00000043866	6945.35	277.067	3.715597e+002	4.001653e+001	422	41.5	8.376879e+000	0	0	0	0	0	0	310.187	1	1	43.7019	41.5417
DATA	1115	14	10	0	0	A_42_P516693	NM_001107330	6970.67	276.5	3.642918e+001	1.520422e+001	138	44.5	1.620386e+001	0	0	0	0	0	0	30.6108	1	0	65	48.7727
DATA	1116	14	11	0	0	A_64_P125447	NM_001109231	6995.94	277.175	4.339160e+002	4.580242e+001	473	43	9.102860e+000	0	0	0	0	0	0	367.035	1	1	45.4864	44.1724
DATA	1117	14	12	0	0	A_42_P701756	NM_001107646	7021.56	276.973	6.216758e+003	6.218465e+002	5281	42	1.096253e+001	0	0	0	1	0	0	5292.84	1	1	48.5334	41.3421
DATA	1118	14	13	0	0	A_44_P344181	NM_017204	7047.03	276.716	2.101286e+003	2.106266e+002	1880	47	9.851527e+000	0	0	0	0	0	0	1800.42	1	1	48.8603	44.9118
DATA	1119	14	14	0	0	A_64_P035330	ENSRNOT00000066415	7072.06	276.968	3.800563e+002	4.063735e+001	447	42.5	8.956095e+000	0	0	0	0	0	0	327.68	1	1	45.1352	41.7143
DATA	1120	14	15	0	0	A_42_P837533	NM_001134546	7097.59	276.694	9.902710e+003	9.903742e+002	8583	46	6.332659e+000	0	0	0	0	0	0	8591.07	1	1	52.0157	45.2222
DATA	1121	14	16	0	0	A_42_P744291	NM_001025729	7122.99	276.618	4.435747e+003	4.438022e+002	3911	41	8.297724e+000	0	0	0	0	0	0	3871.74	1	1	53.5237	40.931
DATA	1122	14	17	0	0	A_44_P149267	NM_001013099	7148.63	277.071	1.570857e+002	2.112453e+001	246	38.5	7.152204e+000	0	0	0	0	0	0	137.953	1	1	42.5954	38.8667
DATA	1123	14	18	0	0	A_64_P002546	NM_144741	7173.95	276.523	2.494273e+001	1.426207e+001	132	40	9.935016e+000	0	0	0	0	0	0	22.0322	1	0	55.8519	41.2727
DATA	1124	14	19	0	0	A_42_P808236	NM_001107189	7199.45	277.373	4.602717e+002	4.809752e+001	515.5	39.5	8.473441e+000	0	0	0	1	0	0	408.971	1	1	46.1809	41.0278
DATA	1125	14	20	0	0	A_44_P425848	NM_001108747	7224.63	277.265	1.535605e+003	1.541867e+002	1463	41	8.976792e+000	0	0	0	0	0	0	1372.1	1	1	46.5243	41.129
DATA	1126	14	21	0	0	A_43_P17405	TC612613	7250.09	276.614	8.791163e+002	8.898910e+001	878	45	1.119255e+001	0	0	0	0	0	0	789.823	1	1	57.259	44.8387
DATA	1127	14	22	0	0	A_64_P022402	NM_001142304	7275.5	276.648	5.637096e+001	1.484350e+001	158.5	40.5	8.430791e+000	0	0	0	0	0	0	50.9203	1	0	57.5363	41.9474
DATA	1128	14	23	0	0	A_44_P1019726	ENSRNOT00000025138	7300.81	277.094	5.183885e+002	5.360809e+001	586.5	41	9.291727e+000	0	0	0	0	0	0	470.757	1	1	45.835	42.5185
DATA	1129	14	24	0	0	A_44_P128186	NM_053305	7326.42	276.573	2.990648e+002	3.284896e+001	386	35.5	8.633069e+000	0	0	0	0	0	0	272.982	1	1	57.5363	36.2333
DATA	1130	14	25	0	0	A_44_P203665	NM_001105725	7351.5	276.648	5.197541e+002	5.370549e+001	584.5	33	8.907086e+000	0	0	0	0	0	0	476.78	1	1	57.5363	35.5185
DATA	1131	14	26	0	0	A_42_P688802	DV723748	7377.23	277.116	1.241026e+004	1.241099e+003	11292.5	35	8.295196e+000	0	0	0	0	0	0	11441	1	1	46.5243	35.087
DATA	1132	14	27	0	0	A_64_P129943	NM_001105712	7402.64	277.13	2.027562e+003	2.031979e+002	1932	33	5.602148e+000	0	0	0	0	1	0	1878.05	1	1	46.8651	33.0833
DATA	1133	14	28	0	0	A_64_P017577	NM_001106982	7427.59	277.164	4.434302e+001	1.404926e+001	148	38.5	1.494811e+001	0	0	0	0	0	0	41.2582	1	0	48.5334	43.7273
DATA	1134	14	29	0	0	A_44_P235926	NM_024138	7453.14	277.056	7.003000e+002	7.127656e+001	751	42	1.073884e+001	0	0	0	0	0	0	654.482	1	1	46.8651	42.2857
DATA	1135	14	30	0	0	A_42_P611638	NM_001034137	7478.63	277	2.886002e+003	2.889026e+002	2723	40	8.912559e+000	0	0	0	0	0	0	2708.75	1	1	48.5334	41.0606
DATA	1136	14	31	0	0	A_42_P654878	NM_001107919	7504	277.038	3.578792e+003	3.581211e+002	3413	43	9.146948e+000	0	0	0	0	0	0	3372.84	1	1	48.8603	41.3333
DATA	1137	14	32	0	0	A_64_P017464	NM_001135687	7529.44	276.882	2.278496e+001	1.330575e+001	125.5	46	1.192197e+001	0	0	0	0	0	0	21.5587	1	0	47.2035	43
DATA	1138	14	33	0	0	A_64_P152873	NM_001207022	7554.79	277.194	1.299243e+002	1.842142e+001	226.5	42.5	1.047400e+001	0	0	0	0	0	0	123.402	1	1	47.5395	43.2308
DATA	1139	14	34	0	0	A_64_P013243	A_64_P013243	7580.16	277.103	7.630323e+003	7.631433e+002	7277.5	38	9.957745e+000	0	0	0	0	0	0	7273.57	1	1	46.5243	39.8148
DATA	1140	14	35	0	0	A_64_P029720	NM_001109405	7605.52	277.362	6.621604e+002	6.747372e+001	735	41	1.143566e+001	0	0	0	0	0	0	633.404	1	1	47.5395	43.0244
DATA	1141	14	36	0	0	A_43_P13459	NM_001107548	7630.91	277.386	4.388415e+002	4.574769e+001	518	40	9.278877e+000	0	0	0	0	0	0	421.172	1	1	57.259	41.9512
DATA	1142	14	37	0	0	A_64_P053923	NM_001107323	7656.57	276.761	3.620274e+003	3.622566e+002	3519.5	45.5	1.155353e+001	0	0	0	0	0	0	3485.36	1	1	46.5243	46.9706
DATA	1143	14	38	0	0	A_44_P1005199	ENSRNOT00000032786	7681.78	277.264	4.608407e+001	1.364719e+001	152	45	1.034985e+001	0	0	0	0	0	0	44.4989	1	0	47.5395	43.8235
DATA	1144	14	39	0	0	A_44_P104821	NM_024369	7707.68	277.309	4.297605e+002	4.484431e+001	525	39	4.952018e+000	0	0	0	0	0	0	416.161	1	1	46.5243	38.8214
DATA	1145	14	40	0	0	A_64_P009956	A_64_P009956	7732.56	277.451	4.509625e+002	4.687111e+001	548	40	8.490729e+000	0	0	0	0	0	0	437.818	1	1	47.8731	40.3226
DATA	1146	14	41	0	0	A_64_P060947	NM_203334	7757.91	277.386	6.837535e+001	1.446333e+001	173	43	9.530258e+000	0	0	0	0	0	0	66.5442	1	1	57.259	42.7027
DATA	1147	14	42	0	0	A_64_P103419	NM_001106291	7783.17	277.467	1.276591e+001	1.273097e+001	113	42	8.440940e+000	0	0	0	0	0	0	5.97391	0	0	49.5074	41.871
DATA	1148	14	43	0	0	A_44_P220827	NM_001012051	7808.58	277.427	2.590676e+003	2.593782e+002	2633.5	44	1.270636e+001	0	0	0	0	0	0	2532.3	1	1	57.5363	45.4194
DATA	1149	14	44	0	1	ETG07_105829	ETG07_105829	7834.11	277.5	1.271463e+001	1.272797e+001	118	42	1.113680e+001	0	0	0	0	0	0	12.3693	0	0	56.9804	42.15
DATA	1150	14	45	0	0	A_42_P719478	NM_001191779	7859.86	277.167	1.816502e+002	2.213178e+001	288	43	9.430619e+000	0	0	0	0	0	0	178.211	1	1	47.2035	43.5641
DATA	1151	14	46	0	0	A_42_P462257	NM_001109481	7884.97	277.302	7.756826e+003	7.757853e+002	7668	44	8.094260e+000	0	0	0	0	0	0	7621.78	1	1	45.1352	42.2727
DATA	1152	14	47	0	0	A_44_P105634	NM_001007658	7910.4	277.048	2.768793e+002	3.042264e+001	376.5	41	1.036644e+001	0	0	0	0	0	0	272.432	1	1	44.0646	42.0345
DATA	1153	14	48	0	0	A_64_P100594	NM_001000360	7935.58	277.427	1.046087e+002	1.636944e+001	210	39.5	1.406713e+001	0	0	0	0	0	0	103.054	1	1	57.5363	44.3333
DATA	1154	14	49	0	0	A_64_P004266	A_64_P004266	7961.11	277.5	3.657148e+001	1.309863e+001	141.5	41.5	7.984180e+000	0	0	0	0	0	0	36.0655	1	0	56.9804	41.3333
DATA	1155	14	50	0	0	A_44_P156343	NM_001000102	7986.5	277.5	2.285049e+001	1.277307e+001	126	44.5	1.011593e+001	0	0	0	0	0	0	22.5536	1	0	65	44.9643
DATA	1156	14	51	0	0	A_42_P504358	NM_001108674	8011.67	277.5	4.814559e+002	4.975657e+001	572	41.5	1.047851e+001	0	0	0	0	0	0	475.518	1	1	57.5363	43.0278
DATA	1157	14	52	0	0	A_44_P281468	NM_001127556	8037.13	277.381	2.220095e+001	1.274721e+001	127	49	1.632308e+001	0	0	0	0	0	0	21.938	1	0	44.7812	49.7353
DATA	1158	14	53	0	0	A_43_P12785	NM_053364	8062.5	277.5	1.259727e+001	1.257800e+001	115	44	1.063843e+001	0	0	0	0	0	0	8.54655	0	0	65	45.6364
DATA	1159	14	54	0	0	A_64_P053297	NM_001107278	8088	277.5	8.654311e+003	8.655220e+002	8776	42.5	1.072654e+001	0	0	0	0	0	0	8555.91	1	1	44.4243	45.1
DATA	1160	14	55	0	0	A_64_P062986	NM_001001018	8113.32	277.283	3.497443e+001	1.302518e+001	141	38	1.139693e+001	0	0	0	0	0	0	34.5755	1	0	43.7019	38.84
DATA	1161	14	56	0	0	A_44_P529226	NM_023091	8138.67	277.5	1.259820e+001	1.258389e+001	113	38.5	1.023765e+001	0	0	0	0	0	0	9.23384	0	0	57.5363	40.9286
DATA	1162	14	57	0	0	A_42_P559737	NM_020074	8164.41	277.746	9.022641e+003	9.023515e+002	8910	44	1.031981e+001	0	0	0	0	0	0	8914.83	1	1	47.5395	44.037
DATA	1163	14	58	0	0	A_44_P1017458	NM_199402	8189.63	277.643	2.436859e+002	2.741524e+001	347.5	40	1.168332e+001	0	0	0	0	0	0	240.643	1	1	47.8731	41
DATA	1164	14	59	0	0	A_44_P407750	NM_001127680	8215.18	277.831	3.172414e+003	3.174903e+002	3196	43.5	1.354625e+001	0	0	0	0	0	0	3130.6	1	1	47.2035	43.8824
DATA	1165	14	60	0	0	A_64_P033872	NM_001037353	8240.42	277.573	1.360451e+002	1.852977e+001	236	41	1.250123e+001	0	0	0	0	0	0	134.133	1	1	57.5363	42.931
DATA	1166	14	61	0	0	A_42_P472699	NM_001108061	8265.58	277.573	1.242622e+002	1.769202e+001	227	39.5	1.207182e+001	0	0	0	0	0	0	122.389	1	1	65	42.3929
DATA	1167	14	62	0	0	A_44_P201215	ENSRNOT00000014231	8291.42	277.573	2.493921e+001	1.285322e+001	129	35.5	1.214678e+001	0	0	0	0	0	0	24.5333	1	0	57.5363	38.5625
DATA	1168	14	63	0	0	A_64_P129910	NM_001107648	8316.37	277.658	1.225838e+003	1.232323e+002	1274	37	6.421587e+000	0	0	0	0	0	0	1204.27	1	1	48.2044	38.0667
DATA	1169	14	64	0	0	A_64_P027927	NM_022255	8341.91	277.614	1.357031e+002	1.854871e+001	241	42	7.852445e+000	0	0	0	0	0	0	133.112	1	1	57.259	41.075
DATA	1170	14	65	0	0	A_64_P101623	A_64_P101623	8367.43	278.032	2.710773e+004	2.710802e+003	27005	37.5	8.390203e+000	0	0	0	0	0	0	26545.9	1	1	44.0646	37.8929
DATA	1171	14	66	0	0	A_42_P645110	NM_001029919	8392.85	277.836	4.101260e+004	4.101280e+003	39654	40.5	7.537015e+000	0	0	0	0	0	0	40088.4	1	1	47.5395	40.2647
DATA	1172	14	67	0	0	A_64_P017781	NM_001010956	8417.93	277.871	2.139250e+002	2.488570e+001	319	42	8.555700e+000	0	0	0	0	0	0	208.696	1	1	46.8651	41.6667
DATA	1173	14	68	0	0	A_64_P057106	NM_001004087	8443.42	277.87	4.332176e+002	4.515669e+001	525.5	37.5	7.090223e+000	0	0	0	0	0	0	421.725	1	1	47.2035	37.0667
DATA	1174	14	69	0	0	A_44_P187005	NM_022238	8468.63	277.596	1.750955e+002	2.167202e+001	281.5	42	1.257000e+001	0	0	0	0	0	0	170.063	1	1	65	41.1724
DATA	1175	14	70	0	0	A_42_P779933	NM_017117	8494.27	277.7	1.039696e+002	1.649195e+001	202.5	38	8.618078e+000	0	0	0	0	0	0	100.736	1	1	46.8651	37.2667
DATA	1176	14	71	0	0	A_42_P555701	NM_001107554	8519.8	277.911	1.837244e+004	1.837289e+003	17766	39.5	9.732104e+000	0	0	0	0	0	0	17755.6	1	1	49.1849	39.9231
DATA	1177	14	72	0	0	A_42_P705302	NM_001107361	8545.15	277.893	1.674219e+004	1.674268e+003	15995	42	7.560205e+000	0	0	0	0	0	0	16136.7	1	1	50.1463	40.8148
DATA	1178	14	73	0	0	A_64_P015435	A_64_P015435	8570.64	277.781	3.311456e+004	3.311481e+003	34199	36	9.230152e+000	0	0	0	0	0	0	31826.5	1	1	44.7812	37.9355
DATA	1179	14	74	0	0	A_64_P036217	NM_001000569	8595.84	277.897	7.346295e+001	1.488286e+001	180	38	9.609858e+000	0	0	0	0	0	0	70.3999	1	1	46.5243	38.1176
DATA	1180	14	75	0	0	A_44_P543511	NM_001024749	8621.13	278	2.321563e+003	2.325191e+002	2361	40	1.072208e+001	0	0	0	0	0	0	2217.99	1	1	45.4864	39.5143
DATA	1181	14	76	0	0	A_42_P759043	NM_001134509	8646.76	278	1.613523e+003	1.618771e+002	1645	38	9.496223e+000	0	0	0	0	0	0	1536.59	1	1	46.8651	38.9412
DATA	1182	14	77	0	0	A_42_P679982	NM_001107835	8672.09	277.918	7.845860e+003	7.846948e+002	7439	40.5	1.608229e+001	0	0	0	0	0	0	7447.13	1	1	51.0895	46
DATA	1183	14	78	0	0	A_43_P18064	NM_001106904	8697.63	277.958	1.240616e+002	1.805147e+001	225	36	1.122108e+001	0	0	0	0	0	0	117.354	1	1	48.2044	41.1333
DATA	1184	14	79	0	0	A_64_P092143	NM_001129879	8723.13	277.855	4.300685e+003	4.302698e+002	4251	36	8.242296e+000	0	0	0	0	0	0	4053.76	1	1	45.4864	35.8108
DATA	1185	14	80	0	0	A_64_P102886	A_64_P102886	8748.42	278.427	1.325769e+001	1.320669e+001	109	36	5.847893e+000	0	0	0	0	0	0	1.18857	0	0	57.5363	37.2581
DATA	1186	14	81	66	1	DarkCorner	DarkCorner	8773.5	278.352	1.330649e+001	1.325470e+001	89	34	5.732074e+000	0	0	0	0	0	0	-24.0219	0	0	57.5363	34.24
DATA	1187	14	82	66	1	DarkCorner	DarkCorner	8798.76	278.5	1.335672e+001	1.330474e+001	81.5	34	1.113186e+001	0	0	0	0	0	0	-30.2462	0	0	47.2035	35.5806
DATA	1188	14	83	66	1	DarkCorner	DarkCorner	8824.54	278.029	1.341018e+001	1.335799e+001	83	37.5	1.115424e+001	0	0	0	0	0	0	-28.6799	0	0	48.2044	37.6471
DATA	1189	14	84	66	1	DarkCorner	DarkCorner	8849.83	277.789	1.346364e+001	1.341124e+001	83	37.5	7.365046e+000	0	0	0	0	0	0	-28.6599	0	0	47.5395	36
DATA	1190	14	85	66	1	DarkCorner	DarkCorner	8875.24	277.824	1.351819e+001	1.346558e+001	94	33	8.565190e+000	0	0	0	0	0	0	-21.3124	0	0	46.1809	34.1444
DATA	1191	15	1	66	1	DarkCorner	DarkCorner	6729.58	283.573	3.036680e+001	1.602235e+001	126.5	35	8.789467e+000	0	0	0	1	0	0	23.9424	1	0	57.5363	35.4638
DATA	1192	15	2	66	1	DarkCorner	DarkCorner	6755.12	283.684	1.568264e+001	1.562160e+001	91	39.5	8.984086e+000	0	0	0	0	0	0	-19.6154	0	0	49.5074	38.9
DATA	1193	15	3	66	1	DarkCorner	DarkCorner	6779.86	284.395	1.557467e+001	1.551405e+001	90	42.5	9.963593e+000	0	0	0	0	0	0	-20.9725	0	0	48.8603	43.7813
DATA	1194	15	4	66	1	DarkCorner	DarkCorner	6805.43	283.926	1.546770e+001	1.540750e+001	96	41	1.053706e+001	0	0	0	0	0	0	-12.1424	0	0	46.5243	42.3793
DATA	1195	15	5	66	1	DarkCorner	DarkCorner	6831.42	283.573	1.535987e+001	1.530009e+001	96.5	39.5	9.896794e+000	0	0	0	0	0	0	-15.0308	0	0	65	40.4118
DATA	1196	15	6	0	0	A_44_P451392	NM_001108023	6856.44	283.734	1.263951e+003	1.273054e+002	1120.5	47.5	1.010823e+001	0	0	0	0	0	0	1031.65	1	1	50.7771	46.7813
DATA	1197	15	7	0	0	A_64_P012661	ENSRNOT00000010298	6881.87	284.233	3.747876e+003	3.750914e+002	3204	47	9.758033e+000	0	0	0	0	0	0	3080.25	1	1	44.4243	45.1724
DATA	1198	15	8	0	0	A_42_P546058	NM_053670	6907.3	283.9	1.416132e+004	1.416211e+003	11624.5	43	9.152853e+000	0	0	0	0	0	0	11717.1	1	1	47.2035	44.1333
DATA	1199	15	9	0	0	A_42_P695401	NM_031530	6932.7	284.284	4.472478e+002	4.713835e+001	477	43	8.233764e+000	0	0	0	0	0	0	372.563	1	1	46.1809	42.8889
DATA	1200	15	10	0	0	A_44_P192193	A_44_P192193	6958.09	283.614	2.030232e+002	2.512027e+001	280	41	8.928223e+000	0	0	0	0	0	0	170.228	1	1	57.259	41.65
DATA	1201	15	11	0	0	A_42_P473886	NM_001165922	6983.5	283.648	6.960021e+002	7.113490e+001	693	43	8.345258e+000	0	0	0	0	0	0	587.421	1	1	57.5363	43.68
DATA	1202	15	12	0	0	A_42_P576953	NM_138882	7008.63	283.958	1.380810e+003	1.388510e+002	1276	40.5	6.251769e+000	0	0	0	0	0	0	1172.95	1	1	48.2044	40.7308
DATA	1203	15	13	0	0	A_44_P260227	ENSRNOT00000036745	7034.5	284	1.822243e+002	2.329168e+001	264.5	41	1.128614e+001	0	0	0	0	0	0	155.808	1	1	54.1152	43.2424
DATA	1204	15	14	0	0	A_44_P276435	NM_053853	7059.25	284	7.928863e+002	8.058882e+001	787	41.5	9.490179e+000	0	0	0	0	0	0	682.13	1	1	49.1849	43.2857
DATA	1205	15	15	0	0	A_43_P19066	NM_001017494	7084.84	283.897	5.567509e+002	5.748912e+001	595	45	8.811795e+000	0	0	0	0	0	0	481.986	1	1	46.5243	44.9091
DATA	1206	15	16	0	0	A_64_P113200	ENSRNOT00000061930	7110.51	284.143	7.144935e+001	1.593089e+001	169	43	7.020321e+000	0	0	0	0	0	0	62.2411	1	1	47.8731	42.1481
DATA	1207	15	17	0	0	A_42_P480108	NM_001007637	7135.84	283.897	3.275371e+003	3.278428e+002	2939	39.5	7.380932e+000	0	0	0	0	0	0	2870.35	1	1	46.5243	40.9333
DATA	1209	15	19	0	0	A_44_P420046	NM_021669	7186.5	284	2.210301e+002	2.615798e+001	303.5	42.5	8.617277e+000	0	0	0	0	0	0	195.98	1	1	54.1152	43.1333
DATA	1210	15	20	0	0	A_64_P077021	A_64_P077021	7212	284.319	3.809909e+001	1.442128e+001	142	38	9.001660e+000	0	0	0	0	0	0	33.9761	1	0	58.0869	39.0667
DATA	1211	15	21	0	0	A_44_P292558	NM_213559	7237.3	284.1	9.910074e+002	1.000614e+002	1000	40	9.457205e+000	0	0	0	0	0	0	888.658	1	1	47.2035	40.5652
DATA	1212	15	22	0	0	A_42_P471653	NM_001031654	7262.58	284.427	1.129579e+002	1.780024e+001	199	42	1.044357e+001	0	0	0	0	0	0	101.847	1	1	57.5363	42.4545
DATA	1213	15	23	0	0	A_43_P12000	NM_019272	7288.12	284.274	2.321793e+003	2.325822e+002	2192	45.5	7.609432e+000	0	0	0	0	0	0	2104.6	1	1	51.7088	42.4
DATA	1214	15	24	0	0	A_64_P131395	NM_001037523	7313.21	284.44	3.335428e+001	1.401619e+001	138.5	38	1.003474e+001	0	0	0	0	0	0	30.3901	1	0	49.1849	38.9706
DATA	1215	15	25	0	0	A_42_P682853	NM_017193	7338.99	284.178	2.422486e+003	2.426269e+002	2303.5	37	9.240630e+000	0	0	0	0	0	0	2218.49	1	1	46.8651	37.4516
DATA	1216	15	26	0	0	A_42_P647505	TC640289	7364.37	284.36	7.430244e+003	7.431467e+002	6709.5	36	7.491931e+000	0	0	0	0	0	0	6838.18	1	1	48.8603	35.75
DATA	1217	15	27	0	0	A_44_P682959	NM_001025139	7389.58	284.427	1.346627e+001	1.347661e+001	122	33	5.878937e+000	0	0	0	0	1	0	12.012	0	0	57.5363	33.4762
DATA	1218	15	28	0	0	A_64_P249426	NM_001014271	7415.42	284.427	4.532567e+001	1.409929e+001	148	34	1.284199e+001	0	0	0	0	0	0	42.1101	1	0	57.5363	40.2
DATA	1219	15	29	0	0	A_64_P133430	NM_001044282	7440.69	284.053	4.139584e+004	4.139605e+003	37678	50	2.031637e+001	0	0	0	0	0	0	38629.5	1	1	49.1849	51.2963
DATA	1220	15	30	0	0	A_42_P635611	NM_001025685	7465.89	284.5	1.328618e+001	1.325106e+001	114	43.5	1.050883e+001	0	0	0	0	0	0	6.21174	0	0	65	43.625
DATA	1221	15	31	0	0	A_42_P592013	NM_001127600	7491.37	284.37	5.295516e+003	5.297156e+002	4937.5	40	8.221516e+000	0	0	0	1	0	0	4983.87	1	1	48.2044	41.52
DATA	1222	15	32	0	1	ETG02_36680	ETG02_36680	7516.58	284.427	1.317808e+001	1.313010e+001	110.5	46.5	5.671972e+000	0	0	0	0	0	0	2.78289	0	0	57.5363	46.3667
DATA	1223	15	33	0	0	A_42_P608478	NM_001025131	7542.11	284.5	2.148454e+001	1.325122e+001	129	44	1.086120e+001	0	0	0	0	0	0	20.3801	1	0	56.9804	43.9677
DATA	1224	15	34	0	0	A_44_P137397	NM_017236	7567.3	284.659	1.054314e+005	1.054314e+004	100091	38	1.020057e+001	0	0	0	0	0	0	100380	1	1	51.0895	38.8621
DATA	1226	15	36	0	0	A_64_P110789	A_64_P110789	7618.33	284.5	1.298849e+001	1.296112e+001	116	43	9.781329e+000	0	0	0	0	0	0	7.42753	0	0	57.5363	43.9756
DATA	1227	15	37	0	0	A_64_P061562	A_64_P061562	7644.07	284.583	1.899024e+003	1.903397e+002	1871.5	43	1.076109e+001	0	0	0	0	0	0	1826.54	1	1	48.2044	43.6364
DATA	1228	15	38	0	0	A_44_P511359	NM_001108736	7669.14	284.593	1.619895e+003	1.624989e+002	1643	45	1.017135e+001	0	0	0	0	0	0	1562.73	1	1	50.7771	44.3514
DATA	1229	15	39	0	0	A_42_P658220	NM_001109598	7694.63	284.5	4.472662e+003	4.474499e+002	4372.5	43	1.141545e+001	0	0	0	0	0	0	4327.22	1	1	47.8731	44
DATA	1230	15	40	0	0	A_42_P479096	NM_001008293	7720	284.735	2.660622e+003	2.663692e+002	2618	41.5	1.115437e+001	0	0	0	0	0	0	2581.08	1	1	46.1809	41.5
DATA	1231	15	41	0	0	A_64_P275280	NM_001109569	7745.5	284.5	9.794932e+003	9.795762e+002	9328	44	1.128614e+001	0	0	0	0	0	0	9526	1	1	49.1849	45.2424
DATA	1232	15	42	0	0	A_42_P785926	NM_001108289	7770.93	284.718	3.543576e+003	3.545859e+002	3417	43	7.919646e+000	0	0	0	0	0	0	3454.43	1	1	47.2035	44.4815
DATA	1233	15	43	0	0	A_64_P005238	A_64_P005238	7796	284.545	5.582498e+001	1.386979e+001	161	42	8.023707e+000	0	0	0	0	0	0	54.5367	1	0	55.8519	41.8108
DATA	1234	15	44	0	0	A_42_P555753	NM_001106401	7821.59	284.753	1.054623e+004	1.054699e+003	10276	46	1.085511e+001	0	0	0	1	0	0	10323.7	1	1	48.5334	44.6
DATA	1235	15	45	0	0	A_42_P469751	XM_001054007	7847.12	284.735	1.014430e+004	1.014509e+003	10019	43	9.173614e+000	0	0	0	0	0	0	9948.41	1	1	45.835	42.2821
DATA	1236	15	46	0	0	A_44_P506124	XM_222590	7872.38	284.631	6.528814e+003	6.530035e+002	6612	44	8.878767e+000	0	0	0	0	0	0	6413.17	1	1	45.1352	43.7586
DATA	1237	15	47	0	0	A_44_P441947	XM_001079870	7897.89	284.648	4.474628e+003	4.476404e+002	4627	42	8.417492e+000	0	0	0	0	0	0	4401.84	1	1	47.8731	41.3333
DATA	1238	15	48	0	0	A_64_P127659	NM_001106228	7923	284.5	6.820145e+003	6.821308e+002	6650.5	47	1.320621e+001	0	0	0	0	0	0	6717.7	1	1	49.8279	48.2414
DATA	1239	15	49	0	0	A_42_P733076	NM_001033867	7948.48	284.933	1.286829e+003	1.292962e+002	1326	42	1.033892e+001	0	0	0	0	0	0	1268.95	1	1	48.8603	43.4348
DATA	1240	15	50	0	0	A_64_P145939	NM_001109499	7973.63	285	1.256779e+002	1.777285e+001	231	43	8.269476e+000	0	0	0	0	0	0	124.047	1	1	48.5334	43.2069
DATA	1241	15	51	0	0	A_44_P1040796	NM_001106660	7999.22	284.824	3.615610e+004	3.615632e+003	35612	45	9.762473e+000	0	0	0	0	0	0	35713.8	1	1	48.2044	45.6
DATA	1242	15	52	0	0	A_42_P588072	NM_001106829	8024.83	285.087	4.352957e+002	4.530254e+001	530.5	41	1.132776e+001	0	0	0	0	0	0	430.229	1	1	46.8651	43.4545
DATA	1243	15	53	0	0	A_64_P045823	ENSRNOT00000023172	8049.91	284.614	3.445565e+002	3.666838e+001	445	51	1.555961e+001	0	0	0	0	0	0	340.674	1	1	57.259	52.8889
DATA	1244	15	54	0	0	A_42_P591344	NM_001037780	8075.57	284.608	5.303182e+003	5.304665e+002	5332	42.5	7.402159e+000	0	0	0	0	0	0	5244.66	1	1	49.1849	41.9667
DATA	1245	15	55	0	0	A_64_P120322	A_64_P120322	8100.5	284.648	2.375992e+001	1.276445e+001	127	38	8.698053e+000	0	0	0	0	0	0	23.4991	1	0	57.5363	38.7391
DATA	1246	15	56	0	0	A_64_P062665	NM_001170470	8126.31	285.014	7.491336e+001	1.460945e+001	181	40	9.554754e+000	0	0	0	0	0	0	74.0841	1	1	47.2035	39.72
DATA	1247	15	57	0	0	A_44_P398300	NM_001005538	8151.72	284.902	2.344207e+003	2.347562e+002	2373	38	1.073541e+001	0	0	0	0	0	0	2317.58	1	1	49.8279	39.9063
DATA	1248	15	58	0	0	A_64_P001545	ENSRNOT00000029141	8176.61	284.931	6.742873e+004	6.742884e+003	66264	44	9.606768e+000	0	0	0	0	0	0	66633.2	1	1	53.8203	45.04
DATA	1249	15	59	0	0	A_44_P1010653	NM_001109021	8202.37	285	1.019390e+004	1.019468e+003	10073	43.5	1.509209e+001	0	0	0	0	0	0	10067.3	1	1	50.4627	43.2333
DATA	1250	15	60	0	0	A_44_P398969	NM_001013225	8228.17	285	2.758113e+003	2.760976e+002	2779	41	1.294831e+001	0	0	0	0	0	0	2721.67	1	1	46.8651	43.6
DATA	1251	15	61	0	0	A_64_P059495	NM_001109986	8253.24	285	7.920536e+003	7.921535e+002	7812	38	1.084074e+001	0	0	0	0	0	0	7808.49	1	1	46.8651	39.8077
DATA	1252	15	62	0	0	A_64_P037040	A_64_P037040	8278.5	285	3.449300e+002	3.672082e+001	441	37.5	1.098267e+001	0	0	0	0	0	0	339.672	1	1	48.5334	39.7857
DATA	1253	15	63	0	0	A_64_P051446	NM_001142942	8304.09	285.104	1.815295e+004	1.815339e+003	17367	36	8.418106e+000	0	0	0	0	0	0	17853.3	1	1	46.8651	38.7419
DATA	1254	15	64	0	0	A_42_P701756	NM_001107646	8329.5	285.216	6.322250e+003	6.323511e+002	6103	39	7.103934e+000	0	0	0	0	0	0	6208.97	1	1	49.1849	39.1389
DATA	1255	15	65	0	0	A_44_P172604	NM_031795	8354.95	284.742	8.342291e+003	8.343251e+002	8073	41	9.337212e+000	0	0	0	0	0	0	8179.49	1	1	45.835	40.9744
DATA	1256	15	66	0	0	A_64_P152000	A_64_P152000	8379.91	285.386	1.272139e+001	1.268674e+001	111	41	9.615920e+000	0	0	0	0	0	0	6.00773	0	0	65	40.8182
DATA	1257	15	67	0	0	A_44_P339008	NM_001024975	8405.64	285.13	3.092075e+003	3.094681e+002	3111.5	45	1.097345e+001	0	0	0	0	0	0	3020.77	1	1	46.8651	44.8
DATA	1258	15	68	0	0	A_44_P560070	A_44_P560070	8430.58	285.427	1.277153e+001	1.276359e+001	114.5	39	6.222229e+000	0	0	0	0	0	0	10.0587	0	0	57.5363	38.871
DATA	1259	15	69	0	0	A_44_P520509	NM_001033868	8456.63	284.735	1.096386e+004	1.096461e+003	10563	35.5	9.142898e+000	0	0	0	0	0	0	10665.2	1	1	46.5243	36.5
DATA	1260	15	70	0	0	A_42_P643349	NM_001109495	8481.52	284.812	1.005258e+002	1.626002e+001	203.5	39	1.018587e+001	0	0	0	0	0	0	97.5643	1	1	47.2035	39.5758
DATA	1261	15	71	0	0	A_44_P215075	NM_012667	8507.25	284.797	1.762849e+002	2.179264e+001	278	38	8.450938e+000	0	0	0	0	0	0	170.663	1	1	45.1352	37.4688
DATA	1262	15	72	0	0	A_44_P560363	ENSRNOT00000049736	8532.56	284.768	1.664915e+003	1.669863e+002	1730	41	8.984396e+000	0	0	0	0	0	0	1607.63	1	1	46.8651	40.913
DATA	1263	15	73	0	0	A_44_P553158	NM_001014014	8557.94	284.969	4.454236e+003	4.456098e+002	4223	42	9.839847e+000	0	0	0	0	0	0	4289.26	1	1	46.8651	41.125
DATA	1264	15	74	0	0	A_64_P165277	NM_001106370	8583.33	285.5	1.366246e+001	1.298938e+001	120	36	8.166241e+000	0	0	0	0	0	0	13.1192	1	0	57.5363	37
DATA	1265	15	75	0	0	A_64_P138187	A_64_P138187	8608.58	285.277	1.071956e+003	1.079757e+002	1132.5	36	9.270165e+000	0	0	0	0	0	0	1026.26	1	1	51.4001	37.6897
DATA	1266	15	76	0	0	A_44_P429041	XM_227654	8634.18	285.373	5.238572e+002	5.397385e+001	612.5	39	8.705043e+000	0	0	0	0	0	0	499.958	1	1	45.835	39
DATA	1267	15	77	0	0	A_44_P465880	NM_199389	8659.64	285.13	4.517819e+003	4.519700e+002	4372	38	1.074330e+001	0	0	0	0	0	0	4297.69	1	1	46.8651	40.55
DATA	1268	15	78	0	0	A_44_P381740	NM_001000239	8684.58	285.427	1.815986e+001	1.320700e+001	124	38	8.608708e+000	0	0	0	0	0	0	17.2189	1	0	57.5363	40.7879
DATA	1269	15	79	0	0	A_64_P045211	NM_001191733	8710.11	285.5	3.269435e+001	1.352788e+001	142	36	9.626845e+000	0	0	0	0	0	0	30.8933	1	0	56.9804	37.3636
DATA	1270	15	80	0	0	A_64_P010896	A_64_P010896	8735.5	285.5	1.322496e+001	1.317349e+001	108.5	36	6.410845e+000	0	0	0	0	0	0	-0.211891	0	0	57.5363	37.1471
DATA	1271	15	81	0	0	A_42_P566906	NM_001006966	8761.07	285.268	1.035846e+004	1.035930e+003	9743.5	35	8.423106e+000	0	0	0	0	0	0	9717.24	1	1	47.5395	36.2222
DATA	1272	15	82	66	1	DarkCorner	DarkCorner	8786.6	285.075	1.332407e+001	1.327221e+001	85.5	32	1.035686e+001	0	0	0	0	0	0	-24.591	0	0	46.1809	34.2581
DATA	1273	15	83	66	1	DarkCorner	DarkCorner	8811.97	285.176	1.337497e+001	1.332292e+001	79	36.5	1.294644e+001	0	0	0	0	0	0	-32.9524	0	0	47.5395	37.1
DATA	1274	15	84	66	1	DarkCorner	DarkCorner	8836.87	285.676	1.342562e+001	1.337336e+001	88	39	8.288112e+000	0	0	0	0	0	0	-25.9971	0	0	45.835	39.5476
DATA	1275	15	85	66	1	DarkCorner	DarkCorner	8862.9	285.269	1.348108e+001	1.342861e+001	83.5	36	7.452211e+000	0	0	0	0	0	0	-28.9931	0	0	45.835	36.3846
DATA	1276	16	1	66	1	DarkCorner	DarkCorner	6741.89	291.414	1.571656e+001	1.565539e+001	94.5	36.5	9.488317e+000	0	0	0	0	0	0	-16.7467	0	0	46.5243	37.82
DATA	1277	16	2	66	1	DarkCorner	DarkCorner	6767.47	291.12	1.560800e+001	1.554725e+001	98	44	7.916408e+000	0	0	0	0	0	0	-14.2083	0	0	48.8603	44.1481
DATA	1278	16	3	66	1	DarkCorner	DarkCorner	6792.76	291.084	1.550098e+001	1.544065e+001	87	44.5	1.210372e+001	0	0	0	0	0	0	-21.4047	0	0	46.8651	44.875
DATA	1279	16	4	66	1	DarkCorner	DarkCorner	6818.19	291.419	1.539359e+001	1.533368e+001	100	44	9.806370e+000	0	0	0	0	0	0	-9.45677	0	0	48.2044	42.3235
DATA	1280	16	5	0	0	A_42_P708614	NM_001130505	6843.58	291.427	7.297833e+004	7.297849e+003	58839.5	47	1.039631e+001	0	0	0	0	0	0	59439.2	1	1	57.5363	45.4
DATA	1281	16	6	0	0	A_44_P427177	NM_053923	6869.11	291.084	1.518524e+001	1.513236e+001	112	47	1.259848e+001	0	0	0	0	0	0	3.55717	0	0	46.8651	46.6897
DATA	1282	16	7	0	0	A_44_P417051	NM_001024886	6894.5	291.352	1.696250e+002	2.265916e+001	252	42	1.099513e+001	0	0	0	0	0	0	140.044	1	1	57.5363	43.8214
DATA	1283	16	8	0	0	A_64_P052917	ENSRNOT00000029053	6919.91	291.386	7.262769e+001	1.659672e+001	168	43	8.739014e+000	0	0	0	0	0	0	60.3657	1	0	65	43.7037
DATA	1284	16	9	0	0	A_42_P689013	NM_053800	6945.46	291.386	3.449678e+004	3.449710e+003	28393.5	41	8.134249e+000	0	0	0	1	0	0	28864.6	1	1	47.5395	41.5652
DATA	1285	16	10	0	0	A_42_P668072	NM_013130	6970.68	291.273	9.792844e+002	9.902974e+001	915.5	45	9.111518e+000	0	0	0	0	0	0	824.748	1	1	49.8279	44.7391
DATA	1286	16	11	0	0	A_44_P762596	XM_237156	6995.81	291.392	2.975391e+002	3.315758e+001	369	42	8.990337e+000	0	0	0	0	0	0	252.207	1	1	49.1849	42.8846
DATA	1287	16	12	0	0	A_44_P673662	TC577636	7021.44	291.534	4.415855e+002	4.649026e+001	480	40	6.976232e+000	0	0	0	0	0	0	376.746	1	1	49.1849	40.5667
DATA	1288	16	13	0	0	A_42_P674598	NM_013067	7047	291.271	4.818666e+004	4.818688e+003	41458	41	8.374565e+000	0	0	0	0	0	0	41372.6	1	1	46.8651	40.9333
DATA	1289	16	14	0	0	A_44_P529994	NM_001191720	7072.22	291.519	5.128134e+001	1.524517e+001	151	42.5	7.847077e+000	0	0	0	0	0	0	44.3051	1	0	49.8279	42.1875
DATA	1290	16	15	0	0	A_42_P655644	NM_133618	7097.75	291.373	7.793933e+003	7.795239e+002	6756	46	5.925694e+000	0	0	0	0	0	0	6775.27	1	1	49.1849	44.9231
DATA	1291	16	16	0	0	A_42_P589674	NM_001044225	7122.97	291.147	9.635073e+003	9.636117e+002	8316.5	43.5	7.260074e+000	0	0	0	1	0	0	8426.02	1	1	46.8651	42.4688
DATA	1292	16	17	0	0	A_64_P010139	A_64_P010139	7148.56	291.26	8.551101e+002	8.666547e+001	845	36	8.909582e+000	0	0	0	0	0	0	752.313	1	1	49.5074	38.2258
DATA	1293	16	18	0	0	A_42_P586883	NM_001106416	7173.89	291.5	2.123302e+002	2.544204e+001	294	40.5	8.256599e+000	0	0	0	0	0	0	187.902	1	1	56.9804	41.3333
DATA	1294	16	19	0	0	A_42_P461144	DV724416	7199.25	291.514	2.190125e+003	2.194555e+002	1999.5	42	9.421310e+000	0	0	0	1	0	0	1949.27	1	1	48.5334	41.7586
DATA	1295	16	20	0	0	A_64_P130565	NM_031668	7224.74	291.652	1.506747e+003	1.513106e+002	1432.5	40	9.264988e+000	0	0	0	0	0	0	1348.64	1	1	47.2035	39.44
DATA	1296	16	21	0	0	A_64_P002826	NM_001134527	7249.77	291.797	2.638419e+002	2.976735e+001	346	41.5	1.070723e+001	0	0	0	0	0	0	237.44	1	1	46.1809	42.1
DATA	1298	16	23	0	0	A_64_P036099	A_64_P036099	7300.75	291.639	3.326309e+003	3.329104e+002	3117.5	45.5	8.346577e+000	0	0	0	0	0	0	3025.4	1	1	51.0895	42.5357
DATA	1299	16	24	0	0	A_64_P080580	ENSRNOT00000040473	7326.34	291.522	1.635877e+003	1.641494e+002	1637	36.5	8.910128e+000	0	0	0	0	0	0	1495.54	1	1	46.5243	35.9412
DATA	1300	16	25	0	0	A_43_P12276	NM_022636	7351.04	291.662	3.652793e+001	1.398749e+001	141	37	8.972119e+000	0	0	0	0	0	0	33.5564	1	0	49.1849	38.0323
DATA	1301	16	26	0	0	A_42_P505393	NM_199085	7377.14	291.581	3.015986e+003	3.018978e+002	2715	36	9.796203e+000	0	0	0	0	0	0	2784.38	1	1	48.5334	36.9677
DATA	1302	16	27	0	0	A_44_P883619	ENSRNOT00000032374	7402.31	291.68	1.342539e+001	1.338336e+001	112	34.5	7.660836e+000	0	0	0	0	0	0	4.85118	0	0	48.8603	36.5833
DATA	1303	16	28	0	0	A_44_P493894	ENSRNOT00000050156	7427.67	291.5	2.225960e+005	2.225961e+004	207373	48	2.055623e+001	0	0	0	0	0	0	207393	1	1	57.5363	51.5926
DATA	1304	16	29	0	0	A_64_P085334	TC585414	7453.44	291.521	1.253149e+004	1.253219e+003	11491	46	1.325006e+001	0	0	0	0	0	0	11727.7	1	1	48.2044	46.7241
DATA	1306	16	31	0	0	A_64_P045433	A_64_P045433	7503.93	291.507	1.305819e+004	1.305885e+003	12283.5	42	8.675453e+000	0	0	0	0	0	0	12322	1	1	45.835	40.7778
DATA	1307	16	32	0	0	A_64_P025351	AY724474	7529.42	291.573	6.642825e+004	6.642838e+003	62514.5	44	9.484955e+000	0	0	0	0	0	0	62930.8	1	1	57.5363	43.6333
DATA	1308	16	33	0	0	A_44_P501626	ENSRNOT00000050744	7554.58	291.573	3.522095e+001	1.351148e+001	141	38.5	1.361410e+001	0	0	0	0	0	0	33.4912	1	0	65	41.6333
DATA	1309	16	34	0	0	A_64_P071525	NM_001000141	7580.42	291.573	1.304743e+001	1.300067e+001	113.5	38.5	1.002388e+001	0	0	0	0	0	0	3.08481	0	0	57.5363	40.9333
DATA	1310	16	35	0	0	A_64_P006545	A_64_P006545	7605	292.408	3.001795e+004	3.001823e+003	29084.5	44	1.053871e+001	0	0	0	0	0	0	28745.8	1	1	46.8651	45.2424
DATA	1311	16	36	0	0	A_64_P089561	NM_001044265	7630.97	292	1.273460e+002	1.813372e+001	230	45	1.127888e+001	0	0	0	0	0	0	122.354	1	1	46.8651	45.8108
DATA	1312	16	37	0	0	A_44_P791108	NM_001014070	7656.15	291.931	7.906220e+001	1.510460e+001	181.5	49	1.068542e+001	0	0	0	0	0	0	76.1969	1	1	46.8651	47.9412
DATA	1313	16	38	0	0	A_44_P161535	A_44_P161535	7681.79	292.121	1.619857e+004	1.619907e+003	16182	45	1.294604e+001	0	0	0	0	0	0	15658.1	1	1	43.3362	46.4
DATA	1314	16	39	0	0	A_44_P299136	NM_001108539	7707.18	291.831	1.317034e+003	1.323237e+002	1371	42	1.269682e+001	0	0	0	0	0	0	1276.59	1	1	47.2035	44.069
DATA	1315	16	40	1028	1	(+)E1A_r60_a97	E1A_r60_a97	7732.5	291.648	1.281371e+001	1.276384e+001	108	41	1.152979e+001	0	0	0	0	0	0	-0.423469	0	0	57.5363	42.3103
DATA	1316	16	41	0	0	A_44_P161723	NM_001134526	7757.84	291.786	2.898116e+002	3.165493e+001	385	44.5	9.227796e+000	0	0	0	0	0	0	282.319	1	1	46.5243	44.5938
DATA	1317	16	42	0	0	A_64_P121443	A_64_P121443	7782.89	291.932	1.275421e+001	1.270457e+001	104	41	7.543435e+000	0	0	0	0	0	0	-1.02614	0	0	46.8651	40.1818
DATA	1318	16	43	0	0	A_42_P771373	NM_012614	7808.83	292	1.042004e+004	1.042081e+003	9972	38.5	7.766687e+000	0	0	0	0	0	0	10194.9	1	1	46.8651	39.8929
DATA	1319	16	44	0	0	A_44_P1025944	NM_147140	7834	291.839	1.457044e+004	1.457098e+003	14196	44.5	1.214164e+001	0	0	0	0	0	0	14282.3	1	1	51.4001	45.25
DATA	1320	16	45	0	0	A_64_P014085	NM_001007678	7859.64	291.884	2.711220e+003	2.714161e+002	2710	44	8.854135e+000	0	0	0	0	0	0	2662.24	1	1	46.5243	43.0645
DATA	1321	16	46	0	0	A_64_P095298	NM_001047963	7884.91	291.896	8.431674e+001	1.517128e+001	191	42	9.752137e+000	0	0	0	0	0	0	82.9211	1	1	46.8651	40.3333
DATA	1322	16	47	0	0	A_64_P122037	A_64_P122037	7910.25	292	5.074032e+004	5.074048e+003	49659	42	1.168899e+001	0	0	0	0	0	0	49969.1	1	1	49.1849	42.8485
DATA	1323	16	48	0	0	A_64_P098094	A_64_P098094	7935.5	292	8.922377e+004	8.922386e+003	88286	48	1.440554e+001	0	0	0	0	0	0	87972	1	1	54.1152	47.3448
DATA	1324	16	49	0	0	A_44_P353708	ENSRNOT00000033510	7960.91	292.145	6.611813e+001	1.420044e+001	169	42	9.903523e+000	0	0	0	0	0	0	65.2576	1	1	46.8651	44.8148
DATA	1325	16	50	0	0	A_42_P541669	ENSRNOT00000043345	7986.44	292.027	4.145806e+003	4.147707e+002	4237.5	47	1.043547e+001	0	0	0	0	0	0	4095.29	1	1	48.5334	44.5517
DATA	1326	16	51	0	0	A_42_P560894	NM_019138	8012.06	292.232	6.206836e+003	6.208105e+002	6067	44.5	1.024552e+001	0	0	0	0	0	0	6135.4	1	1	46.5243	43.3824
DATA	1327	16	52	0	0	A_42_P498066	NM_031136	8037.18	292.423	1.025492e+005	1.025493e+004	101631	43	1.586311e+001	0	0	0	0	0	0	101419	1	1	50.1463	48.973
DATA	1328	16	53	0	0	A_42_P538928	NM_053021	8062.5	292.352	8.579696e+004	8.579705e+003	85486.5	45.5	1.342136e+001	0	0	0	0	0	0	84878.1	1	1	57.5363	48.4412
DATA	1329	16	54	0	0	A_64_P302169	NM_001099493	8087.9	292.164	5.219593e+001	1.357951e+001	156	41	7.232249e+000	0	0	0	0	0	0	51.6439	1	0	46.1809	39.3448
DATA	1330	16	55	0	0	A_43_P18282	NM_001173436	8113.38	292	2.776188e+002	3.046133e+001	391	40	9.323007e+000	0	0	0	0	0	0	274.672	1	1	48.5334	40.0385
DATA	1331	16	56	0	0	A_44_P304169	NM_001000482	8138.4	291.75	3.610787e+002	3.822322e+001	485	38	9.306136e+000	0	0	0	0	0	0	357.172	1	1	42.9674	39.3333
DATA	1332	16	57	0	0	A_44_P318932	XM_231081	8164.38	292.295	1.334153e+004	1.334212e+003	13186	40	1.106691e+001	0	0	0	0	0	0	13192.6	1	1	50.4627	41.9583
DATA	1333	16	58	0	0	A_64_P124621	A_64_P124621	8189.47	292.031	1.013182e+002	1.612983e+001	210.5	41	1.101067e+001	0	0	0	0	0	0	100.132	1	1	44.0646	41.7879
DATA	1334	16	59	0	0	A_42_P553960	NM_001107831	8215.26	292.222	1.228682e+004	1.228746e+003	11961.5	49	1.383856e+001	0	0	0	0	0	0	12134.4	1	1	47.5395	47.4545
DATA	1335	16	60	0	0	A_64_P129459	A_64_P129459	8240.37	292.512	1.687518e+003	1.692193e+002	1744.5	39	1.057385e+001	0	0	0	0	0	0	1665.18	1	1	52.3208	40.037
DATA	1336	16	61	0	0	A_64_P083224	ENSRNOT00000017383	8265.69	292.06	5.723249e+001	1.382378e+001	162	42	1.346023e+001	0	0	0	0	0	0	56.4153	1	0	45.835	45.2174
DATA	1337	16	62	0	0	A_64_P031840	NM_001017445	8291.26	292.222	3.301385e+003	3.303788e+002	3234.5	39	1.000924e+001	0	0	0	0	0	0	3250.36	1	1	47.5395	40.5806
DATA	1338	16	63	0	0	A_43_P16427	NM_001191000	8316.63	292.5	2.890821e+002	3.154093e+001	379	40	1.121635e+001	0	0	0	0	0	0	284.234	1	1	47.8731	41.5
DATA	1339	16	64	0	0	A_64_P159034	NM_001191681	8341.94	292.382	3.605641e+004	3.605663e+003	35391	38	7.144160e+000	0	0	0	0	0	0	35398.1	1	1	46.1809	39.2439
DATA	1340	16	65	0	0	A_64_P009007	A_64_P009007	8367.42	292.427	7.251119e+001	1.458560e+001	174	40	9.064555e+000	0	0	0	0	0	0	71.0687	1	1	57.5363	40.6154
DATA	1341	16	66	0	0	A_42_P489817	NM_001107681	8392.82	292.63	7.697642e+003	7.698686e+002	7840.5	43	1.051998e+001	0	0	0	0	0	0	7530.9	1	1	48.2044	43.7931
DATA	1342	16	67	0	0	A_42_P643272	NM_053389	8418.11	292.5	6.831610e+003	6.832791e+002	6869	42	9.488506e+000	0	0	0	0	0	0	6670.51	1	1	56.9804	43.4286
DATA	1343	16	68	0	0	A_64_P076063	XM_001061753	8443.31	292.338	1.753712e+002	2.167037e+001	273	40	9.531273e+000	0	0	0	0	0	0	170.876	1	1	48.5334	39.3871
DATA	1344	16	69	0	0	A_64_P047371	NM_001109423	8469.06	292.232	3.842958e+003	3.845076e+002	4000.5	39	8.549433e+000	0	0	0	0	0	0	3735.87	1	1	46.5243	38.9697
DATA	1345	16	70	0	0	A_44_P991940	XM_225667	8494.2	292.394	1.033572e+002	1.644372e+001	206.5	40	1.064492e+001	0	0	0	0	0	0	100.24	1	1	47.5395	41.3333
DATA	1346	16	71	0	0	A_42_P667802	ENSRNOT00000014585	8519.93	292.268	1.029999e+003	1.037950e+002	1070	38	6.647938e+000	0	0	0	0	0	0	996.372	1	1	47.5395	36.8485
DATA	1347	16	72	0	0	A_44_P433942	A_44_P433942	8545	292.545	1.090270e+002	1.685650e+001	209	40	1.028882e+001	0	0	0	0	0	0	105.193	1	1	55.8519	40.2121
DATA	1348	16	73	0	0	A_42_P735279	NM_001004446	8570.42	292.573	6.875656e+004	6.875668e+003	66602.5	40	8.343016e+000	0	0	0	0	0	0	66153.6	1	1	57.5363	41.0345
DATA	1349	16	74	0	0	A_64_P000316	A_64_P000316	8595.58	292.573	1.175445e+002	1.747363e+001	218.5	36	9.151166e+000	0	0	0	0	0	0	112.768	1	1	57.5363	36.6207
DATA	1350	16	75	0	0	A_64_P073357	XM_001070426	8621.22	293.083	1.850526e+002	2.259690e+001	287.5	39.5	7.819537e+000	0	0	0	0	0	0	176.997	1	1	44.7812	38.875
DATA	1351	16	76	0	0	A_42_P501972	NM_001025418	8646.88	292.603	1.683834e+003	1.688852e+002	1687.5	39	8.118827e+000	0	0	0	0	0	0	1605.35	1	1	48.5334	38.7143
DATA	1352	16	77	0	0	A_64_P030824	ENSRNOT00000002002	8671.85	292.649	1.570394e+002	2.041974e+001	254	38	9.246372e+000	0	0	0	0	0	0	149.24	1	1	48.8603	40.7667
DATA	1353	16	78	0	0	A_42_P537715	NM_001025743	8697.69	292.662	6.704908e+003	6.706187e+002	6312.5	36	8.665163e+000	0	0	0	0	0	0	6350.1	1	1	48.5334	37.4667
DATA	1354	16	79	0	0	A_44_P596424	TC642059	8723.07	292.732	6.153979e+002	6.292746e+001	704	37	9.902081e+000	0	0	0	0	0	0	580.814	1	1	47.5395	37.9474
DATA	1355	16	80	0	0	A_42_P528891	XM_001074805	8748.69	292.681	1.099350e+003	1.107234e+002	1135	34.5	6.515867e+000	0	0	0	0	0	0	1033.83	1	1	48.2044	35.25
DATA	1356	16	81	0	0	A_64_P130516	A_64_P130516	8773.5	292.648	8.721439e+001	1.585209e+001	193.5	35	8.044767e+000	0	0	0	0	0	0	81.7225	1	1	57.5363	35.4194
DATA	1357	16	82	66	1	DarkCorner	DarkCorner	8798.89	292.742	1.333889e+001	1.328697e+001	81	36	1.150900e+001	0	0	0	0	0	0	-30.0248	0	0	45.835	35.6667
DATA	1358	16	83	66	1	DarkCorner	DarkCorner	8824.45	292.8	1.339047e+001	1.333836e+001	85	37	8.034275e+000	0	0	0	0	0	0	-25.9228	0	0	49.1849	35.5429
DATA	1359	16	84	66	1	DarkCorner	DarkCorner	8849.71	292.603	1.344302e+001	1.339070e+001	85	39	8.556998e+000	0	0	0	0	0	0	-27.2971	0	0	46.5243	39.2222
DATA	1360	16	85	66	1	DarkCorner	DarkCorner	8875.39	292.931	1.349694e+001	1.344441e+001	89.5	34	8.841561e+000	0	0	0	0	0	0	-22.9561	0	0	53.8203	34.4372
DATA	1361	17	1	66	1	DarkCorner	DarkCorner	6729.66	298.39	1.574807e+001	1.568678e+001	91	35	8.113025e+000	0	0	0	0	0	0	-18.5383	0	0	49.8279	34.8211
DATA	1362	17	2	66	1	DarkCorner	DarkCorner	6754.65	298.792	1.564009e+001	1.557922e+001	89	40.5	8.427107e+000	0	0	0	0	0	0	-19.5388	0	0	47.5395	40.375
DATA	1363	17	3	66	1	DarkCorner	DarkCorner	6780.42	298.427	1.553213e+001	1.547168e+001	91	43	8.056604e+000	0	0	0	0	0	0	-16.2592	0	0	57.5363	42.8621
DATA	1364	17	4	66	1	DarkCorner	DarkCorner	6805.58	298.427	1.542678e+001	1.536673e+001	96	45	1.177508e+001	0	0	0	0	0	0	-10.9258	0	0	57.5363	45.037
DATA	1365	17	5	0	0	A_44_P434817	NM_001012187	6831.22	298.292	1.026444e+004	1.026557e+003	8308.5	44.5	1.017327e+001	0	0	0	0	0	0	8342.42	1	1	47.8731	42.7667
DATA	1366	17	6	0	0	A_64_P153319	A_64_P153319	6856.15	298.559	6.932749e+002	7.096551e+001	676	46	1.124710e+001	0	0	0	0	0	0	567.256	1	1	46.8651	44.1429
DATA	1367	17	7	0	0	A_64_P034394	XM_218828	6881.89	298.5	3.884511e+001	1.554906e+001	139	41	8.717494e+000	0	0	0	0	0	0	32.002	1	0	65	40.0714
DATA	1368	17	8	0	0	A_64_P001399	A_64_P001399	6907.34	298.811	4.068921e+004	4.068949e+003	33169	40.5	9.297031e+000	0	0	0	0	0	0	33748.7	1	1	48.5334	41.5
DATA	1369	17	9	0	0	A_42_P712191	NM_001109207	6932.58	298.573	3.415445e+002	3.724582e+001	392	44	7.606879e+000	0	0	0	0	0	0	285.15	1	1	57.5363	43.7692
DATA	1370	17	10	0	0	A_44_P746633	NM_001109580	6957.97	298.547	1.058417e+004	1.058520e+003	8662.5	38	1.214078e+001	0	0	0	0	0	0	8894.81	1	1	48.8603	42.0385
DATA	1371	17	11	0	0	A_42_P772157	NM_017020	6983.4	298.667	1.271768e+003	1.280194e+002	1148.5	42.5	8.015850e+000	0	0	0	0	0	0	1075.78	1	1	48.5334	42.4231
DATA	1372	17	12	0	0	A_44_P407543	NM_001024996	7008.7	298.9	4.259173e+002	4.501466e+001	465	39	7.388053e+000	0	0	0	0	0	0	362.609	1	1	47.2035	40.6
DATA	1374	17	14	0	0	A_64_P057225	NM_001008857	7059.39	298.594	1.167413e+003	1.176246e+002	1119	40.5	7.229057e+000	0	0	0	0	0	0	1006.43	1	1	47.5395	40.5
DATA	1375	17	15	0	0	A_42_P462015	NM_001011943	7085	298.729	1.098282e+003	1.107550e+002	1061	45	5.911744e+000	0	0	0	0	0	0	952.763	1	1	46.8651	43.5556
DATA	1376	17	16	0	0	A_42_P596050	NM_053572	7110.47	298.685	4.804048e+003	4.806149e+002	4173	43.5	7.402273e+000	0	0	0	1	0	0	4192.97	1	1	48.5334	43.1429
DATA	1377	17	17	0	0	A_44_P213776	NM_052829	7135.85	298.849	5.047294e+002	5.241255e+001	553	42	9.052481e+000	0	0	0	0	0	0	443.175	1	1	47.5395	41.8529
DATA	1378	17	18	0	0	A_64_P004468	A_64_P004468	7161.07	299.197	4.259259e+003	4.261573e+002	3903	38	8.457102e+000	0	0	0	0	0	0	3761.84	1	1	44.7812	39.5484
DATA	1379	17	19	0	0	A_44_P290394	NM_053580	7186.61	299.129	1.001780e+004	1.001877e+003	8874	47	8.639669e+000	0	0	0	0	0	0	8899.18	1	1	47.2035	45.4815
DATA	1380	17	20	0	0	A_64_P076911	XM_215948	7212	299.265	2.931837e+002	3.243971e+001	374	41	8.984616e+000	0	0	0	0	0	0	261.923	1	1	46.1809	38.84
DATA	1381	17	21	0	0	A_64_P155895	NM_001009658	7237.39	298.805	6.655614e+003	6.657046e+002	6134.5	41.5	1.019634e+001	0	0	0	0	0	0	5978.57	1	1	52.0157	41.1818
DATA	1382	17	22	0	0	A_43_P16338	ENSRNOT00000034555	7262.78	299.154	3.911858e+002	4.145928e+001	466.5	41.5	9.257554e+000	0	0	0	0	0	0	353.309	1	1	45.835	40.2333
DATA	1383	17	23	0	0	A_42_P716283	NM_001107983	7288.28	299.104	2.652289e+003	2.655804e+002	2494	39	8.785510e+000	0	0	0	0	0	0	2408.18	1	1	45.835	41
DATA	1384	17	24	0	0	A_43_P13355	NM_139082	7313.63	299	9.896909e+002	9.989796e+001	984	40	9.515579e+000	0	0	0	0	0	0	903.218	1	1	48.5334	37.7097
DATA	1385	17	25	0	0	A_64_P126065	NM_001005900	7338.91	298.614	3.570083e+002	3.817659e+001	433	37	9.513996e+000	0	0	0	0	0	0	327.431	1	1	57.259	37.25
DATA	1386	17	26	0	0	A_44_P838532	NM_001107144	7364.5	299.257	2.365151e+003	2.368977e+002	2290	38	7.753557e+000	0	0	0	0	0	0	2180.02	1	1	47.2035	38.9412
DATA	1387	17	27	0	0	A_42_P785861	NM_001009422	7389.69	298.986	4.481497e+003	4.483498e+002	4058	36	7.244063e+000	0	0	0	0	0	0	4150.03	1	1	47.2035	36.7083
DATA	1388	17	28	0	0	A_42_P641962	NM_012999	7415.16	299.103	5.031164e+003	5.032930e+002	4766	38.5	1.278587e+001	0	0	0	0	0	0	4680.58	1	1	46.5243	42.9615
DATA	1389	17	29	0	0	A_64_P085201	TC633318	7440.5	299	1.496525e+002	2.000392e+001	250.5	47	1.957079e+001	0	0	0	0	0	0	139.841	1	1	54.1152	50.8889
DATA	1390	17	30	0	0	A_64_P015687	NM_053573	7466.09	299.104	1.493277e+004	1.493335e+003	14098	47	1.061821e+001	0	0	0	0	0	0	14014.3	1	1	46.8651	46.1481
DATA	1391	17	31	0	0	A_64_P078332	NM_012794	7491.44	298.973	1.007325e+003	1.015888e+002	1019	40.5	9.156431e+000	0	0	0	0	0	0	949.271	1	1	48.5334	40.4333
DATA	1392	17	32	0	0	A_42_P637189	NM_031612	7516.91	298.896	1.142163e+004	1.142239e+003	10566	44	7.731116e+000	0	0	0	0	0	0	10806.4	1	1	46.8651	44.3125
DATA	1393	17	33	0	0	A_42_P602472	NM_001008290	7542.07	299.194	7.403912e+003	7.405063e+002	7030	40.5	9.872524e+000	0	0	0	0	0	0	7031.85	1	1	46.8651	40.7813
DATA	1394	17	34	0	0	A_64_P003749	NM_031799	7567.57	299.239	7.503903e+003	7.505031e+002	7138	38.5	1.409508e+001	0	0	0	0	0	0	7153.11	1	1	46.5243	41.4667
DATA	1395	17	35	0	0	A_42_P785861	NM_001009422	7592.63	299.404	4.386339e+003	4.388255e+002	4153	44	8.817876e+000	0	0	0	0	0	0	4195.82	1	1	57.8122	43.8696
DATA	1396	17	36	0	0	A_64_P138889	NM_001013050	7618.19	299.338	4.250612e+003	4.252576e+002	4206	46	1.417733e+001	0	0	0	0	0	0	4079.66	1	1	46.5243	51.0571
DATA	1397	17	37	0	0	A_44_P409820	NM_012908	7643.5	299.352	1.303793e+002	1.832895e+001	233	45	9.224442e+000	0	0	0	0	0	0	125.532	1	1	57.5363	43.9032
DATA	1398	17	38	0	0	A_44_P529880	ENSRNOT00000033370	7669.09	299.386	1.289385e+001	1.284366e+001	102.5	45	1.185055e+001	0	0	0	0	0	0	-2.08649	0	0	57.259	44.625
DATA	1399	17	39	0	0	A_64_P084851	ENSRNOT00000029593	7694.59	299.28	5.589536e+002	5.734385e+001	642	37.5	1.398356e+001	0	0	0	0	0	0	541.342	1	1	48.8603	42.5
DATA	1400	17	40	0	0	A_44_P654068	NM_001114402	7719.58	299.427	9.461756e+002	9.547589e+001	994.5	43.5	1.102640e+001	0	0	0	0	0	0	918.782	1	1	57.5363	46.3077
DATA	1401	17	41	0	0	A_64_P094855	NM_001109591	7745.36	299.219	2.003955e+003	2.008001e+002	2083.5	42	1.261505e+001	0	0	0	0	0	0	1950.84	1	1	44.7812	45.2963
DATA	1402	17	42	0	0	A_42_P516658	NM_001024888	7770.63	299.444	5.104517e+002	5.260418e+001	590	44	8.191656e+000	0	0	0	0	0	0	498.08	1	1	48.2044	43.3548
DATA	1403	17	43	0	0	A_64_P092394	ENSRNOT00000064749	7796	299.455	3.440213e+001	1.314275e+001	139.5	38.5	8.046689e+000	0	0	0	0	0	0	33.6406	1	0	55.8519	39.2222
DATA	1404	17	44	0	0	A_44_P280755	NM_148890	7821.38	299.215	1.353140e+002	1.853015e+001	239.5	45	8.163537e+000	0	0	0	0	0	0	132.578	1	1	45.1352	44.68
DATA	1405	17	45	0	0	A_42_P629062	AF072835	7846.95	298.864	2.554834e+003	2.557957e+002	2556.5	40	8.348925e+000	0	0	0	0	0	0	2507.67	1	1	46.5243	41.2727
DATA	1406	17	46	0	0	A_64_P131141	ENSRNOT00000012638	7872.28	299.092	1.030221e+002	1.628829e+001	208.5	41	8.530291e+000	0	0	0	0	0	0	101.286	1	1	45.835	39.8929
DATA	1407	17	47	0	0	A_42_P756350	NM_021772	7897.5	299.5	4.571010e+002	4.741435e+001	554.5	40	9.352905e+000	0	0	0	0	0	0	450.055	1	1	57.5363	40.0882
DATA	1408	17	48	66	-1	(-)3xSLv1	NegativeControl	7922.89	299.5	1.263100e+001	1.258184e+001	91.5	48.5	1.078723e+001	0	0	0	0	0	0	-12.3607	0	0	56.9804	47.75
DATA	1409	17	49	0	0	A_64_P124796	A_64_P124796	7948.42	299.427	6.882885e+001	1.432929e+001	174	41.5	1.169622e+001	0	0	0	0	0	0	67.9292	1	1	57.5363	44.1923
DATA	1410	17	50	0	0	A_44_P288443	NM_001108878	7973.88	299.582	1.406135e+003	1.411730e+002	1488.5	41.5	1.029017e+001	0	0	0	0	0	0	1389.05	1	1	46.1809	43.5357
DATA	1411	17	51	0	0	A_42_P748004	NM_001135873	7999.38	299.556	5.565967e+003	5.567381e+002	5497	45.5	1.057519e+001	0	0	0	0	0	0	5502.48	1	1	48.2044	44.8125
DATA	1412	17	52	0	0	A_64_P067310	NM_001139507	8024.5	299.5	1.914621e+003	1.918723e+002	1997	39	9.836950e+000	0	0	0	0	0	0	1893.85	1	1	46.5243	40.0323
DATA	1413	17	53	0	0	A_44_P210809	NM_001107334	8049.89	299.5	8.775043e+002	8.864117e+001	967.5	41	1.695503e+001	0	0	0	0	0	0	868.333	1	1	65	48.1111
DATA	1414	17	54	1028	1	(+)E1A_r60_a104	E1A_r60_a104	8075.42	299.573	1.258076e+001	1.253179e+001	93	42	6.963529e+000	0	0	0	0	0	0	-12.8022	0	0	65	41.75
DATA	1415	17	55	0	0	A_44_P1042711	NM_001108426	8100.58	299.573	1.804899e+002	2.197258e+001	285	41	1.022988e+001	0	0	0	0	0	0	178.655	1	1	57.5363	42.0417
DATA	1416	17	56	0	0	A_42_P661992	TC596141	8126.11	299.5	4.749146e+002	4.911725e+001	574	43	6.692471e+000	0	0	0	0	0	0	470.031	1	1	56.9804	42.5926
DATA	1417	17	57	0	0	A_42_P565621	NM_001105971	8151.68	299.588	6.511459e+002	6.631037e+001	745	38	8.960980e+000	0	0	0	0	0	0	644.268	1	1	46.8651	38.6286
DATA	1418	17	58	0	0	A_44_P264600	NM_001013132	8176.67	299.5	3.859419e+002	4.058088e+001	495	41	1.149845e+001	0	0	0	0	0	0	381.693	1	1	57.5363	42
DATA	1419	17	59	0	0	A_64_P034901	TC591400	8202.42	299.573	1.782900e+001	1.267565e+001	119	37	1.265540e+001	0	0	0	0	0	0	17.6217	1	0	57.5363	41.3226
DATA	1420	17	60	0	0	A_42_P468216	NM_001030026	8227.93	299.732	6.888837e+003	6.889981e+002	6865.5	42	1.305077e+001	0	0	0	0	0	0	6803.42	1	1	47.5395	43.5484
DATA	1421	17	61	0	0	A_64_P062855	XM_343708	8253	299.545	5.232721e+001	1.361692e+001	155.5	40	1.417371e+001	0	0	0	0	0	0	51.6294	1	0	55.8519	42.4138
DATA	1422	17	62	0	0	A_64_P048421	AABR03055399	8278.39	299.662	1.263442e+001	1.258524e+001	103.5	41	8.373666e+000	0	0	0	0	0	0	-2.0132	0	0	48.5334	41.4194
DATA	1423	17	63	0	0	A_44_P342166	NM_013187	8304	300.078	1.699097e+003	1.703764e+002	1781.5	40.5	1.076051e+001	0	0	0	0	0	0	1672.49	1	1	46.1809	41.9333
DATA	1424	17	64	0	0	A_42_P748154	XM_001059949	8329.22	299.851	3.873697e+003	3.875752e+002	3835	39	7.909360e+000	0	0	0	0	0	0	3807.57	1	1	46.1809	38.8286
DATA	1425	17	65	0	0	A_64_P157763	A_64_P157763	8354.87	299.704	1.248948e+003	1.255327e+002	1279.5	42	8.957978e+000	0	0	0	0	0	0	1225.66	1	1	47.5395	42.6053
DATA	1426	17	66	0	0	A_64_P155645	NM_022706	8380.18	299.639	3.939275e+004	3.939296e+003	38379	38.5	1.166258e+001	0	0	0	0	0	0	38591.2	1	1	47.8731	41.3571
DATA	1427	17	67	0	0	A_42_P622436	NM_022298	8405.5	299.648	8.983268e+004	8.983277e+003	88224	42	1.062938e+001	0	0	0	0	0	0	87839.8	1	1	57.5363	44.875
DATA	1428	17	68	0	0	A_44_P304190	NM_001014044	8430.58	299.573	7.238426e+002	7.349177e+001	807	41	9.873871e+000	0	0	0	0	0	0	706.364	1	1	57.5363	41.92
DATA	1429	17	69	1028	1	(+)E1A_r60_a104	E1A_r60_a104	8456.37	299.596	1.278846e+001	1.273869e+001	88	41	9.150395e+000	0	0	0	0	0	0	-17.154	0	0	57.8122	40
DATA	1430	17	70	0	0	A_42_P771373	NM_012614	8482.06	300.031	1.017121e+004	1.017201e+003	9842	41.5	1.119529e+001	0	0	0	0	0	0	9880.86	1	1	46.8651	40.1
DATA	1431	17	71	0	0	A_64_P101976	A_64_P101976	8507	300	3.757292e+001	1.333909e+001	144.5	39	9.507579e+000	0	0	0	0	0	0	36.4125	1	0	54.9904	39.0256
DATA	1432	17	72	0	0	A_42_P777935	ENSRNOT00000027369	8532.43	299.897	1.199061e+003	1.205908e+002	1252	35	8.445129e+000	0	0	0	0	0	0	1159.02	1	1	46.5243	37.0345
DATA	1433	17	73	0	0	A_64_P041521	NM_012945	8557.79	299.883	5.016072e+002	5.178474e+001	591.5	40	9.324676e+000	0	0	0	0	0	0	483.544	1	1	48.8603	40.8571
DATA	1434	17	74	0	0	A_44_P102661	NM_138862	8583.15	299.905	5.340808e+003	5.342367e+002	5142.5	42	9.051513e+000	0	0	0	0	0	0	5133.92	1	1	50.4627	42.1786
DATA	1435	17	75	0	0	A_42_P714166	NM_001017491	8608.28	299.905	1.299198e+001	1.298073e+001	118	36.5	8.536669e+000	0	0	0	0	0	0	9.67562	0	0	48.8603	37.2333
DATA	1436	17	76	0	0	A_64_P098703	NM_198728	8633.84	299.897	2.753051e+003	2.756110e+002	2780	39	7.242991e+000	0	0	0	0	0	0	2630.5	1	1	46.5243	38.2333
DATA	1437	17	77	0	0	A_44_P624151	NM_001107932	8659.41	299.927	1.472285e+003	1.478034e+002	1496	41	8.439468e+000	0	0	0	0	0	0	1402.24	1	1	49.8279	41.2308
DATA	1438	17	78	0	0	A_42_P674843	NM_001008880	8684.83	300	4.280213e+003	4.282206e+002	4189	40	8.463851e+000	0	0	0	0	0	0	4063.15	1	1	46.8651	41.1333
DATA	1439	17	79	0	0	A_44_P1039634	NM_001108924	8710.09	300.386	1.825010e+002	2.247099e+001	282	37	9.051321e+000	0	0	0	0	0	0	172.666	1	1	57.259	37.5938
DATA	1440	17	80	0	0	A_42_P517253	NM_001012275	8735.5	300.352	1.851509e+003	1.856177e+002	1826	39.5	8.680925e+000	0	0	0	1	0	0	1745.59	1	1	57.5363	38.1071
DATA	1441	17	81	0	0	A_42_P485589	NM_017246	8761.11	299.973	6.771408e+002	6.898956e+001	738	36	1.111680e+001	0	0	0	0	0	0	636.068	1	1	46.8651	39
DATA	1442	17	82	66	1	DarkCorner	DarkCorner	8786.42	300.427	1.330456e+001	1.325277e+001	85	35	1.049866e+001	0	0	0	0	0	0	-25.5582	0	0	57.5363	35.6875
DATA	1443	17	83	66	1	DarkCorner	DarkCorner	8811.58	300.427	1.335441e+001	1.330244e+001	82	37	1.060125e+001	0	0	0	0	0	0	-31.5877	0	0	57.5363	36.7143
DATA	1444	17	84	66	1	DarkCorner	DarkCorner	8837.16	300.284	1.340655e+001	1.335437e+001	84	38.5	9.577272e+000	0	0	0	0	0	0	-29.0023	0	0	48.5334	39
DATA	1445	17	85	66	1	DarkCorner	DarkCorner	8862.42	300.427	1.345884e+001	1.340646e+001	88	38	1.039064e+001	0	0	0	0	0	0	-27.3368	0	0	57.5363	39.2692
DATA	1446	18	1	66	1	DarkCorner	DarkCorner	6742.17	305.776	1.567249e+001	1.561149e+001	95	38	9.962548e+000	0	0	0	0	0	0	-15.4783	0	0	49.1849	38.5641
DATA	1447	18	2	66	1	DarkCorner	DarkCorner	6767.64	306.217	1.556355e+001	1.550297e+001	85	43	6.283429e+000	0	0	0	0	0	0	-23.5679	0	0	46.8651	43.4074
DATA	1448	18	3	66	1	DarkCorner	DarkCorner	6793.09	306.32	1.545677e+001	1.539661e+001	87	44	8.436374e+000	0	0	0	0	0	0	-23.4836	0	0	47.8731	42.3793
DATA	1449	18	4	0	0	A_42_P608713	TC595074	6818.48	306.055	1.932771e+003	1.938811e+002	1669	46	9.502575e+000	0	0	0	0	0	0	1567.64	1	1	48.5334	45.0323
DATA	1450	18	5	0	0	A_44_P411771	XM_001056376	6843.75	305.658	1.062139e+003	1.072947e+002	970.5	47	9.344468e+000	0	0	0	0	0	0	867.263	1	1	48.2044	44.3704
DATA	1451	18	6	0	0	A_42_P703647	NM_001108688	6869.42	305.573	3.420646e+001	1.547078e+001	139	41	1.178492e+001	0	0	0	0	0	0	28.121	1	0	57.5363	42.2069
DATA	1452	18	7	0	0	A_64_P139212	NM_001030052	6894.43	306.239	3.905256e+004	3.905285e+003	31677	40	1.187976e+001	0	0	0	0	0	0	32321	1	1	46.5243	41.4583
DATA	1453	18	8	0	0	A_64_P082461	FQ211879	6919.91	305.614	8.404952e+002	8.535811e+001	788.5	44	7.526780e+000	0	0	0	0	0	0	700.196	1	1	57.259	44.963
DATA	1454	18	9	0	0	A_64_P144053	NM_001108100	6945.48	305.932	4.612479e+002	4.843801e+001	486	42	9.400097e+000	0	0	0	0	0	0	386.827	1	1	48.5334	42.1481
DATA	1455	18	10	0	0	A_42_P455802	NM_001013929	6970.64	306.129	9.842207e+003	9.843304e+002	8265	40	1.204893e+001	0	0	0	0	0	0	8307.89	1	1	46.8651	43.48
DATA	1456	18	11	0	0	A_44_P575367	ENSRNOT00000068160	6996.37	305.596	1.465713e+001	1.460009e+001	107	46	8.803784e+000	0	0	0	0	0	0	-2.24037	0	0	57.8122	44.6071
DATA	1457	18	12	0	0	A_64_P008259	ENSRNOT00000040453	7021.25	306	2.674788e+003	2.678720e+002	2410	43	6.965609e+000	0	0	0	0	0	0	2286.75	1	1	49.1849	40.3448
DATA	1458	18	13	0	0	A_44_P433935	NM_001024894	7046.99	306.069	1.673669e+001	1.451314e+001	123	38	6.662297e+000	0	0	0	0	0	0	14.4002	1	0	46.8651	39.6
DATA	1459	18	14	0	0	A_64_P027747	TC585156	7072.35	305.933	9.038793e+003	9.039929e+002	7793	44	8.139248e+000	0	0	0	0	0	0	7825	1	1	49.1849	42.3929
DATA	1460	18	15	0	0	A_44_P247880	ENSRNOT00000032333	7097.52	306.155	3.121911e+001	1.457914e+001	131.5	44	7.211893e+000	0	0	0	0	0	0	27.1915	1	0	47.8731	42.6296
DATA	1461	18	16	0	0	A_44_P422321	NM_001105813	7122.91	306.079	7.464051e+003	7.465393e+002	6561	44.5	1.029345e+001	0	0	0	0	0	0	6540.15	1	1	51.7088	44.9
DATA	1462	18	17	0	0	A_44_P374824	ENSRNOT00000025777	7148.5	306	7.395237e+001	1.589707e+001	175	40	1.209370e+001	0	0	0	0	0	0	65.184	1	1	54.1152	42.8485
DATA	1463	18	18	0	0	A_64_P029482	A_64_P029482	7173.91	306.065	7.019920e+001	1.565321e+001	175	47	9.250882e+000	0	0	0	0	0	0	62.2357	1	1	54.4085	44.6897
DATA	1464	18	19	0	0	A_64_P083918	NM_053396	7199.23	306.116	7.608259e+001	1.585633e+001	176.5	42.5	8.127294e+000	0	0	0	0	0	0	67.8351	1	1	46.5243	42.8571
DATA	1465	18	20	1028	1	(+)E1A_r60_3	E1A_r60_3	7224.33	306.247	5.383448e+001	1.484579e+001	159.5	43	7.192468e+000	0	0	0	0	0	0	48.264	1	0	48.2044	43.2727
DATA	1466	18	21	0	0	A_42_P508415	CV108834	7250.09	305.926	5.406337e+002	5.578689e+001	595	42	9.766190e+000	0	0	0	0	0	0	487.356	1	1	46.8651	41.4615
DATA	1467	18	22	0	0	A_64_P018331	NM_001107720	7275.5	306.056	2.728346e+003	2.731776e+002	2520	35	7.748196e+000	0	0	0	0	0	0	2472.63	1	1	48.5334	37.5135
DATA	1468	18	23	0	0	A_64_P142056	NM_001011938	7300.93	306	1.201175e+004	1.201252e+003	11019	40	9.402506e+000	0	0	0	0	0	0	10942.6	1	1	46.8651	41.0435
DATA	1469	18	24	0	0	A_44_P1030098	NM_001105866	7326.42	306.427	3.683836e+002	3.925000e+001	436.5	37	1.032975e+001	0	0	0	0	0	0	337.316	1	1	57.5363	37.6296
DATA	1470	18	25	0	0	A_64_P125958	NM_177933	7351.58	306.427	1.703370e+002	2.172244e+001	267	38	8.378544e+000	0	0	0	0	0	0	156.734	1	1	57.5363	40
DATA	1471	18	26	0	0	A_64_P002066	XM_001056138	7377	306.455	8.163037e+001	1.570415e+001	185	38	7.768955e+000	0	0	0	0	0	0	75.4718	1	1	55.8519	38.24
DATA	1472	18	27	0	0	A_42_P521242	ENSRNOT00000003841	7402.42	306.427	4.191886e+002	4.399447e+001	497.5	35	9.484811e+000	0	0	0	0	0	0	389.366	1	1	57.5363	37.9643
DATA	1473	18	28	0	0	A_42_P652827	NM_001024274	7427.68	306.471	7.740932e+003	7.742074e+002	7076	46	1.906926e+001	0	0	0	0	0	0	7222.46	1	1	52.3208	49.6452
DATA	1474	18	29	0	0	A_42_P533792	NM_001106575	7453.31	306.338	2.885010e+004	2.885040e+003	26893.5	42.5	1.323184e+001	0	0	0	0	0	0	27035.8	1	1	48.5334	42.7667
DATA	1475	18	30	1028	1	(+)E1A_r60_1	E1A_r60_1	7478.58	306.427	1.323235e+001	1.318085e+001	106	43.5	1.127010e+001	0	0	0	0	0	0	-3.95956	0	0	57.5363	42.4091
DATA	1476	18	31	0	0	A_64_P210103	NM_001100666	7504	306.455	2.028889e+002	2.416553e+001	296	42	8.876869e+000	0	0	0	0	0	0	191.701	1	1	55.8519	41.0811
DATA	1477	18	32	0	0	A_64_P131745	A_64_P131745	7529.42	306.427	8.185313e+001	1.542720e+001	186	41	8.356665e+000	0	0	0	0	0	0	77.6408	1	1	57.5363	40.9231
DATA	1478	18	33	0	0	A_64_P017791	XM_002727063	7554.38	306.347	3.191372e+001	1.341407e+001	138.5	38	1.051498e+001	0	0	0	0	0	0	30.3823	1	0	48.2044	39.25
DATA	1479	18	34	0	0	A_42_P560288	NM_198788	7580	306.5	2.896684e+004	2.896713e+003	27217	41	1.208457e+001	0	0	0	0	0	0	27676.7	1	1	48.5334	42.5862
DATA	1480	18	35	0	0	A_42_P571463	NM_001013221	7605.43	306.392	4.247510e+003	4.249480e+002	4187	46	1.109706e+001	0	0	0	0	0	0	4072.17	1	1	49.1849	46.4
DATA	1481	18	36	0	0	A_42_P648207	NM_001013882	7630.89	306.5	6.533274e+002	6.659329e+001	730.5	51	1.419957e+001	0	0	0	0	0	0	628.402	1	1	56.9804	51.5278
DATA	1482	18	37	0	0	A_64_P120833	NM_131910	7656.49	306.411	3.216053e+004	3.216078e+003	30573.5	48	1.135217e+001	0	0	0	0	0	0	31029.4	1	1	48.5334	45.5556
DATA	1483	18	38	0	0	A_42_P705337	TC582694	7682	306.423	1.501928e+004	1.501983e+003	14450	44.5	1.369374e+001	0	0	0	0	0	0	14533.4	1	1	47.8731	45.5
DATA	1484	18	39	0	0	A_44_P544340	NM_001034939	7707.32	306.507	1.778020e+003	1.782610e+002	1799.5	42	1.250330e+001	0	0	0	0	0	0	1725.22	1	1	49.1849	45.2414
DATA	1486	18	41	0	0	A_44_P310596	NM_001014166	7757.93	306.591	2.486003e+003	2.489255e+002	2469	41	9.548077e+000	0	0	0	0	0	0	2424.15	1	1	52.3208	42.5294
DATA	1487	18	42	0	0	A_64_P013409	A_64_P013409	7783.25	306.329	1.274181e+001	1.272706e+001	112	41	7.330851e+000	0	0	0	0	0	0	9.19764	0	0	49.5074	39.7931
DATA	1488	18	43	0	0	A_64_P076485	A_64_P076485	7808.52	306.612	1.961089e+003	1.965175e+002	2024.5	38	9.098157e+000	0	0	0	0	0	0	1920.47	1	1	45.835	38.9643
DATA	1489	18	44	0	0	A_64_P096121	ENSRNOT00000028891	7834.11	306.5	3.860417e+002	4.062151e+001	476.5	43	7.239020e+000	0	0	0	0	0	0	378.759	1	1	56.9804	41.8182
DATA	1490	18	45	0	0	A_42_P521086	NM_001100857	7859.74	306.42	4.361752e+002	4.540668e+001	529.5	38	7.617082e+000	0	0	0	0	0	0	428.682	1	1	46.8651	38.5926
DATA	1491	18	46	0	0	A_64_P143133	TC637520	7884.58	306.573	7.916900e+001	1.488206e+001	181	39	8.952609e+000	0	0	0	0	0	0	77.9262	1	1	57.5363	38.2778
DATA	1492	18	47	0	0	A_64_P067163	NM_017248	7910.18	306.455	5.342558e+004	5.342573e+003	52445	42	1.217993e+001	0	0	0	0	0	0	52658.5	1	1	52.6241	43.1875
DATA	1493	18	48	0	0	A_64_P118288	NM_053448	7935.74	306.476	1.792035e+003	1.796437e+002	1921	43	1.103587e+001	0	0	0	0	0	0	1768.41	1	1	51.7088	44.625
DATA	1494	18	49	0	0	A_64_P112342	A_64_P112342	7960.91	306.884	8.078563e+001	1.493088e+001	181	41	1.011908e+001	0	0	0	0	0	0	79.8021	1	1	46.8651	41.9355
DATA	1495	18	50	0	0	A_64_P074741	NM_001077680	7986.5	306.648	9.688267e+001	1.585152e+001	198	41	1.104588e+001	0	0	0	0	0	0	95.7821	1	1	57.5363	42.6296
DATA	1496	18	51	0	0	A_64_P153062	NM_001107890	8012	306.648	2.724046e+003	2.726929e+002	2724	39.5	1.040469e+001	0	0	0	0	0	0	2694.88	1	1	47.2035	40.5333
DATA	1497	18	52	0	0	A_64_P051942	A_64_P051942	8037	306.809	4.579888e+002	4.748247e+001	557	38	1.240770e+001	0	0	0	0	0	0	453.305	1	1	46.8651	41.5588
DATA	1498	18	53	0	0	A_44_P233080	ENSRNOT00000026303	8062.69	306.483	2.153209e+004	2.153245e+003	21518	41	6.625107e+000	0	0	0	0	0	0	21318.2	1	1	52.3208	41.2727
DATA	1499	18	54	0	0	A_64_P127747	A_64_P127747	8088	306.681	1.987533e+002	2.349331e+001	296	41	8.836276e+000	0	0	0	0	0	0	196.809	1	1	58.0869	40.1852
DATA	1500	18	55	0	0	A_42_P773155	NM_001106996	8113.5	306.648	6.921568e+004	6.921579e+003	68343	40.5	9.722061e+000	0	0	0	0	0	0	68536.3	1	1	57.5363	40.9615
DATA	1501	18	56	0	0	A_64_P003624	NM_175591	8138.5	307	1.007481e+002	1.607716e+001	201	39	9.062992e+000	0	0	0	0	0	0	99.7415	1	1	54.1152	40.2571
DATA	1502	18	57	0	0	A_64_P148728	NM_030989	8164.39	306.931	8.674646e+002	8.764725e+001	943.5	39	8.794199e+000	0	0	0	0	0	0	858.471	1	1	53.8203	40.8
DATA	1503	18	58	0	0	A_44_P436284	ENSRNOT00000031389	8189.87	307	1.846490e+003	1.850744e+002	1884	41	1.159397e+001	0	0	0	0	0	0	1826.37	1	1	48.5334	42.1429
DATA	1504	18	59	0	0	A_42_P626851	NM_001107917	8215.31	306.986	3.592503e+003	3.594694e+002	3572	40	1.082297e+001	0	0	0	0	0	0	3550.85	1	1	47.2035	40.6333
DATA	1505	18	60	0	0	A_42_P797303	TC587453	8240.59	307.098	2.773910e+004	2.773939e+003	27426	41	1.272360e+001	0	0	0	0	0	0	27394	1	1	49.8279	44.84
DATA	1506	18	61	0	0	A_64_P096312	A_64_P096312	8265.32	306.42	9.721161e+003	9.721974e+002	11150	41.5	1.035802e+001	0	1	0	0	0	0	9590.27	1	1	40.2912	43.2333
DATA	1507	18	62	0	0	A_64_P150894	A_64_P150894	8291.27	306.91	8.514816e+002	8.607360e+001	948	41.5	1.053380e+001	0	0	0	0	0	0	839.023	1	1	49.1849	42.9333
DATA	1508	18	63	0	0	A_64_P241372	NM_001000593	8316.03	307	4.680284e+001	1.344522e+001	151	41	9.963691e+000	0	0	0	0	0	0	46.058	1	0	46.8651	42.6429
DATA	1509	18	64	0	0	A_44_P433621	NM_001025016	8341.91	307.386	9.493468e+002	9.577025e+001	1025	40	8.620001e+000	0	0	0	0	0	0	932.834	1	1	57.259	40.4211
DATA	1510	18	65	0	0	A_64_P163511	NM_013190	8367.44	306.71	2.877182e+003	2.879960e+002	2890.5	40.5	1.096855e+001	0	0	0	0	0	0	2822.34	1	1	46.8651	42.9667
DATA	1511	18	66	0	0	A_44_P129412	AF155959	8393.11	306.727	3.145797e+003	3.148346e+002	3160.5	39	9.093531e+000	0	0	0	0	0	0	3080.22	1	1	45.835	41.6667
DATA	1512	18	67	0	0	A_64_P143037	NM_001025134	8418.09	307.386	5.256845e+002	5.407882e+001	625	43.5	8.823047e+000	0	0	0	0	0	0	513.761	1	1	57.259	44.6154
DATA	1513	18	68	0	0	A_64_P032693	XM_002724830	8443.42	306.901	5.131730e+001	1.371475e+001	153	40	9.396664e+000	0	0	0	0	0	0	50.0472	1	0	47.8731	39.6216
DATA	1514	18	69	0	0	A_42_P727368	NM_001025693	8469.09	306.818	2.971752e+002	3.233612e+001	391	41.5	1.130334e+001	0	0	0	0	0	0	289.165	1	1	45.835	41.8529
DATA	1515	18	70	0	0	A_64_P075765	A_64_P075765	8494.49	306.954	3.863856e+001	1.334888e+001	142	39	9.629368e+000	0	0	0	0	0	0	37.5084	1	0	44.4243	39.4839
DATA	1516	18	71	0	0	A_42_P639174	NM_001106592	8519.86	306.844	3.837567e+003	3.839704e+002	3815	34.5	8.154316e+000	0	0	0	0	0	0	3715.98	1	1	45.4864	35.8529
DATA	1517	18	72	0	0	A_64_P063135	NM_001109623	8545	307.455	1.394045e+002	1.895430e+001	241	37	7.360896e+000	0	0	0	0	0	0	134.642	1	1	55.8519	37.129
DATA	1518	18	73	0	0	A_64_P018236	NM_001108882	8570.42	307.427	1.292837e+001	1.289581e+001	113	41	7.450986e+000	0	0	0	0	0	0	6.51551	0	0	65	41.9643
DATA	1519	18	74	0	0	A_43_P14648	NM_001012034	8595.85	307.217	2.484015e+003	2.487370e+002	2460	39	1.029918e+001	0	0	0	0	0	0	2385.58	1	1	46.1809	39.8387
DATA	1520	18	75	0	0	A_42_P698520	NM_001108216	8621.56	307.029	1.080637e+004	1.080715e+003	10218.5	40	8.304737e+000	0	0	0	0	0	0	10346.5	1	1	46.1809	40.2593
DATA	1521	18	76	0	0	A_43_P19450	NM_001105713	8646.7	307.1	5.998911e+002	6.138049e+001	687	40	7.114303e+000	0	0	0	0	0	0	572.594	1	1	47.2035	39.5517
DATA	1522	18	77	0	0	A_64_P013012	XM_225619	8672	306.774	7.533016e+002	7.645001e+001	817.5	39	8.230864e+000	0	0	0	0	0	0	716.695	1	1	45.4864	40.3333
DATA	1523	18	78	0	0	A_42_P499684	NM_001108642	8697.72	307.015	1.991369e+003	1.995660e+002	1982.5	40	8.709525e+000	0	0	0	0	0	0	1888.24	1	1	46.1809	41.6786
DATA	1524	18	79	0	0	A_64_P297479	ENSRNOT00000044350	8722.93	307.051	3.395289e+004	3.395314e+003	32815	39.5	1.089427e+001	0	0	0	0	0	0	32085	1	1	44.0646	38.7333
DATA	1525	18	80	0	0	A_64_P103238	NM_001014158	8748.39	307.406	1.128052e+003	1.135716e+002	1185	40	1.093923e+001	0	0	0	0	0	0	1062.26	1	1	47.5395	42
DATA	1526	18	81	0	0	A_42_P751562	NM_001037355	8773.51	307.398	1.229842e+004	1.229913e+003	11644	40	1.025850e+001	0	0	0	1	0	0	11539.7	1	1	51.7088	40.2667
DATA	1527	18	82	66	1	DarkCorner	DarkCorner	8798.89	307.5	1.332012e+001	1.326828e+001	82	36	9.687826e+000	0	0	0	0	0	0	-29.6611	0	0	65	35.4444
DATA	1528	18	83	66	1	DarkCorner	DarkCorner	8824.15	307.458	1.337050e+001	1.331846e+001	80.5	33.5	8.945814e+000	0	0	0	0	0	0	-31.8385	0	0	47.8731	33.8
DATA	1529	18	84	66	1	DarkCorner	DarkCorner	8849.37	307.224	1.342226e+001	1.337001e+001	80	40.5	1.063932e+001	0	0	0	0	0	0	-29.6995	0	0	49.5074	40.6765
DATA	1530	18	85	66	1	DarkCorner	DarkCorner	8875.35	307.408	1.347619e+001	1.342374e+001	95	35	8.721864e+000	0	0	0	0	0	0	-20.0554	0	0	47.8731	34.8979
DATA	1531	19	1	66	1	DarkCorner	DarkCorner	6729.3	313.239	1.570481e+001	1.564368e+001	90	34	7.418853e+000	0	0	0	0	0	0	-20.0026	0	0	45.835	34.355
DATA	1532	19	2	66	1	DarkCorner	DarkCorner	6754.8	313.216	2.439265e+001	1.572681e+001	130	41.5	8.473660e+000	0	0	0	1	0	0	19.4741	1	0	47.8731	40.1071
DATA	1533	19	3	66	1	DarkCorner	DarkCorner	6780.04	313.036	1.549216e+001	1.543186e+001	88	43	8.132637e+000	0	0	0	0	0	0	-20.0975	0	0	51.0895	41.1613
DATA	1534	19	4	66	1	DarkCorner	DarkCorner	6805.46	313.105	1.538675e+001	1.532686e+001	99	44.5	1.125054e+001	0	0	0	0	0	0	-12.9146	0	0	48.8603	44.6667
DATA	1535	19	5	0	0	A_44_P198705	NM_012578	6831.09	313.104	2.273105e+004	2.273156e+003	18675	47	8.019208e+000	0	0	0	0	0	0	18522	1	1	46.8651	45.3333
DATA	1536	19	6	0	0	A_42_P604252	NM_001108797	6856.6	313.068	1.781089e+003	1.787495e+002	1528.5	40	8.403435e+000	0	0	0	0	0	0	1461.13	1	1	48.5334	40.1071
DATA	1537	19	7	0	0	A_43_P20016	NM_001107377	6881.71	312.897	3.923117e+002	4.200838e+001	431	38.5	1.077062e+001	0	0	0	0	0	0	323.963	1	1	45.835	40.3846
DATA	1538	19	8	0	0	A_42_P491486	NM_022533	6907.27	313.137	1.289874e+004	1.289960e+003	10681	45.5	9.807938e+000	0	0	0	0	0	0	10723.4	1	1	48.2044	46.75
DATA	1539	19	9	0	0	A_64_P345929	NM_001191639	6932.58	313.654	6.339802e+001	1.612022e+001	163	45	8.926341e+000	0	0	0	0	0	0	53.0571	1	0	51.0895	44.2903
DATA	1540	19	10	0	0	A_64_P152047	NM_001000521	6958.09	313.386	1.614836e+001	1.481342e+001	121	40	6.815016e+000	0	0	0	0	0	0	13.6026	1	0	57.259	40
DATA	1541	19	11	0	0	A_42_P724510	NM_001007625	6983.37	313.436	2.009092e+004	2.009145e+003	16993	46	9.761463e+000	0	0	0	0	0	0	17032.7	1	1	49.8279	44.3846
DATA	1542	19	12	0	0	A_42_P552906	NM_001007701	7008.75	313.356	1.005778e+004	1.005883e+003	8633	44	7.511223e+000	0	0	0	1	0	0	8581.19	1	1	48.5334	43.625
DATA	1543	19	13	0	0	A_64_P121673	A_64_P121673	7034.42	313.427	3.085351e+001	1.477155e+001	137	39	6.586858e+000	0	0	0	0	0	0	26.4921	1	0	57.5363	39.6207
DATA	1544	19	14	0	0	A_64_P047470	NM_001008875	7059.42	313.338	1.002944e+002	1.751397e+001	194.5	41	7.288804e+000	0	0	0	0	0	0	86.6437	1	1	49.8279	41.28
DATA	1545	19	15	0	0	A_43_P14911	NM_031512	7085	313.455	2.021132e+002	2.474095e+001	281.5	45	7.929584e+000	0	0	0	0	0	0	175.687	1	1	55.8519	44.2857
DATA	1546	19	16	0	0	A_44_P117234	NM_001191788	7110.6	313.071	9.664464e+001	1.716339e+001	190	47	1.124381e+001	0	0	0	0	0	0	84.5156	1	1	47.2035	46.8571
DATA	1547	19	17	0	0	A_64_P066782	ENSRNOT00000046676	7135.59	313.28	1.149706e+003	1.158321e+002	1121	42	1.076479e+001	0	0	0	0	0	0	1011.32	1	1	48.8603	42.4545
DATA	1548	19	18	0	0	A_64_P125013	NM_019167	7161.33	313.5	7.542095e+004	7.542108e+003	67072	46	7.288804e+000	0	0	0	0	0	0	66737.2	1	1	57.5363	44.28
DATA	1549	19	19	0	0	A_64_P143121	NM_001099510	7186.5	313.5	3.773112e+001	1.444024e+001	144.5	47	9.022921e+000	0	0	0	0	0	0	33.5763	1	0	57.5363	46.5185
DATA	1550	19	20	0	0	A_64_P065600	NM_022954	7211.89	313.5	1.971342e+001	1.400030e+001	125.5	43	6.892419e+000	0	0	0	0	0	0	17.6411	1	0	56.9804	42.875
DATA	1551	19	21	0	0	A_44_P300818	AF030087	7237.43	313.284	2.209228e+003	2.213524e+002	2035.5	42	7.457389e+000	0	0	0	0	0	0	1987.85	1	1	46.5243	42.3913
DATA	1552	19	22	0	0	A_64_P103130	A_64_P103130	7262.63	313.589	2.679991e+003	2.683496e+002	2580	37.5	8.511119e+000	0	0	0	0	0	0	2424.38	1	1	48.5334	39.0714
DATA	1553	19	23	0	0	A_64_P064938	NM_001109332	7288.33	313.5	2.650212e+001	1.389434e+001	131.5	38	8.429633e+000	0	0	0	0	0	0	24.1014	1	0	57.5363	39.9394
DATA	1554	19	24	0	0	A_64_P087276	NM_138527	7313.5	313.5	1.362351e+001	1.358415e+001	112	42	1.001661e+001	0	0	0	0	0	0	5.56793	0	0	57.5363	41.7586
DATA	1555	19	25	0	0	A_64_P032728	NM_001037778	7339.12	313.603	2.049544e+004	2.049588e+003	18298	40	9.920124e+000	0	0	0	0	0	0	18827.6	1	1	48.5334	39.1379
DATA	1556	19	26	0	0	A_44_P956203	NM_001134992	7364.39	313.935	1.277082e+002	1.853795e+001	222.5	38	6.519093e+000	0	0	0	0	0	0	117.885	1	1	44.0646	38.963
DATA	1557	19	27	0	0	A_64_P106488	A_64_P106488	7389.58	313.573	9.188271e+001	1.622734e+001	193	36	8.133119e+000	0	0	0	0	0	0	85.2074	1	1	57.5363	37.619
DATA	1558	19	28	0	0	A_43_P10011	NM_001025274	7415.11	313.5	3.894087e+003	3.896362e+002	3751	39.5	8.871847e+000	0	0	0	0	0	0	3627.7	1	1	56.9804	40.25
DATA	1559	19	29	0	0	A_44_P321009	NM_012540	7440.5	313.5	1.678190e+001	1.336186e+001	124	39	1.799781e+001	0	0	0	0	0	0	15.7029	1	0	57.5363	43.2759
DATA	1560	19	30	0	0	A_44_P133453	XM_236776	7466	313.5	1.236402e+004	1.236473e+003	11439.5	45	1.047881e+001	0	0	0	0	0	0	11618.5	1	1	48.5334	44.6552
DATA	1561	19	31	0	0	A_64_P027323	NM_001000088	7491.03	313.451	1.095443e+002	1.711217e+001	206	41	1.043134e+001	0	0	0	0	0	0	103.356	1	1	48.2044	41.2903
DATA	1562	19	32	0	0	A_44_P374568	NM_001107778	7517.26	313.712	1.309663e+003	1.316191e+002	1324	42	8.380327e+000	0	0	0	0	0	0	1240.75	1	1	50.7771	41.6667
DATA	1563	19	33	0	0	A_64_P040176	NM_001108498	7542.18	313.878	1.553920e+003	1.559385e+002	1591	39	6.829424e+000	0	0	0	0	0	0	1477.66	1	1	47.8731	39.5556
DATA	1564	19	34	0	0	A_64_P347204	ENSRNOT00000002350	7567.5	313.648	3.266473e+002	3.515544e+001	418	38	1.214022e+001	0	0	0	0	0	0	311.738	1	1	57.5363	39.5806
DATA	1565	19	35	0	0	A_64_P142544	A_64_P142544	7592.58	313.573	2.825609e+001	1.325712e+001	134	46	1.150391e+001	0	0	0	0	0	0	27.0589	1	0	65	45.44
DATA	1566	19	36	0	0	A_64_P047367	NM_017050	7618.2	313.778	1.001137e+005	1.001138e+004	97493.5	47	1.494184e+001	0	0	0	0	0	0	96194.2	1	1	50.7771	52.1176
DATA	1567	19	37	0	0	A_64_P130858	NM_001003705	7643.82	313.797	2.748143e+002	3.034501e+001	369	42	1.194162e+001	0	0	0	0	0	0	264.894	1	1	48.2044	43.8667
DATA	1568	19	38	0	0	A_42_P647009	NM_053814	7669.15	313.712	1.082240e+004	1.082316e+003	10475	36	9.007278e+000	0	0	0	0	0	0	10462.7	1	1	48.2044	39.1481
DATA	1569	19	39	0	0	A_42_P618538	NM_001030031	7694.63	313.957	4.701075e+003	4.702816e+002	4624	47.5	1.230736e+001	0	0	0	0	0	0	4557.74	1	1	46.8651	46.9167
DATA	1570	19	40	0	0	A_64_P048225	NM_001108643	7719.58	313.573	4.059182e+001	1.339102e+001	149	42	8.781989e+000	0	0	0	0	0	0	39.4554	1	0	57.5363	41.96
DATA	1571	19	41	0	0	A_64_P044826	A_64_P044826	7745.15	314	2.694174e+002	2.979734e+001	368	40.5	9.475114e+000	0	0	0	0	0	0	262.535	1	1	46.8651	42
DATA	1572	19	42	0	0	A_64_P046273	NM_001168559	7770.87	313.971	7.323435e+002	7.432726e+001	825	44	7.837462e+000	0	0	0	0	0	0	715.299	1	1	46.8651	42.6774
DATA	1573	19	43	0	0	A_43_P16232	NM_024395	7795.83	314	7.865132e+002	7.966572e+001	868	41.5	7.769747e+000	0	0	0	0	0	0	769.818	1	1	46.8651	38.9
DATA	1574	19	44	0	0	A_44_P147356	XM_225859	7821.28	313.905	1.922427e+004	1.922469e+003	18799	40	8.516650e+000	0	0	0	0	0	0	18853	1	1	48.8603	41.1333
DATA	1575	19	45	0	0	A_44_P979417	ENSRNOT00000068382	7846.91	313.896	5.865841e+001	1.392137e+001	159	42.5	6.965846e+000	0	0	0	0	0	0	57.6292	1	0	46.8651	41.1389
DATA	1576	19	46	0	0	A_44_P283784	NM_001107682	7872.12	313.988	1.973012e+003	1.977035e+002	2034	39	7.945107e+000	0	0	0	0	0	0	1941.5	1	1	49.5074	38.5161
DATA	1577	19	47	0	0	A_44_P112061	ENSRNOT00000046359	7897.76	314	3.474048e+003	3.476327e+002	3430	39	4.009249e+000	0	0	0	0	0	0	3423.53	1	1	46.8651	39
DATA	1578	19	48	0	0	A_42_P541025	NM_212546	7922.94	314.069	5.986387e+002	6.116953e+001	698	41	1.026227e+001	0	0	0	0	0	0	590.674	1	1	46.8651	41.5429
DATA	1579	19	49	0	0	A_44_P156521	NM_001025135	7948.28	314.095	9.838172e+002	9.917988e+001	1078	41.5	8.494704e+000	0	0	0	0	0	0	971.783	1	1	48.8603	43
DATA	1580	19	50	0	0	A_42_P562202	NM_001107959	7973.66	314.081	2.550489e+002	2.842355e+001	361.5	42	1.138716e+001	0	0	0	0	0	0	252.159	1	1	48.8603	43.8966
DATA	1581	19	51	0	0	A_42_P522899	NM_021578	7999.22	314.054	3.689204e+002	3.896393e+001	468	40	1.009267e+001	0	0	0	0	0	0	365.011	1	1	47.8731	41.1724
DATA	1582	19	52	0	0	A_42_P581060	NM_001108722	8024.6	314.147	1.911471e+004	1.911512e+003	18693	33	7.491353e+000	0	0	0	0	0	0	18923	1	1	48.8603	35.25
DATA	1583	19	53	0	1	ERCC-00043_129	ERCC-00043_129	8049.91	314.386	1.257322e+001	1.252600e+001	109	37	7.269732e+000	0	0	0	0	0	0	2.05112	0	0	57.259	38.1852
DATA	1584	19	54	0	0	A_64_P098577	A_64_P098577	8075.42	314.427	1.257038e+001	1.253091e+001	107	44	8.390203e+000	0	0	0	0	0	0	4.81989	0	0	57.5363	43.6071
DATA	1585	19	55	0	0	A_64_P043164	ENSRNOT00000009696	8100.54	313.944	1.004265e+003	1.012040e+002	1106	41.5	9.666598e+000	0	0	0	0	0	0	994.846	1	1	48.2044	40.0357
DATA	1586	19	56	0	0	A_42_P576446	NM_001107673	8126	314.267	2.057909e+004	2.057947e+003	20276	45	9.380932e+000	0	0	0	0	0	0	20384.1	1	1	52.9257	44.2424
DATA	1587	19	57	0	0	A_42_P801593	NM_001134744	8151.68	314.273	3.365610e+003	3.367940e+002	3399	39	9.214226e+000	0	0	0	0	0	0	3332.76	1	1	49.8279	40.3529
DATA	1588	19	58	0	0	A_42_P535743	NM_199393	8177.31	314.338	1.221290e+004	1.221354e+003	12099.5	38	5.472802e+000	0	0	0	0	0	0	12088.2	1	1	48.5334	36.5185
DATA	1589	19	59	0	0	A_64_P051890	ENSRNOT00000056631	8202.42	314.427	4.495163e+001	1.332067e+001	150	36	1.044962e+001	0	0	0	0	0	0	44.4656	1	0	57.5363	38.8621
DATA	1590	19	60	0	0	A_64_P098379	NM_001013890	8227.58	314.427	1.259804e+001	1.257173e+001	111	41	1.060237e+001	0	0	0	0	0	0	7.46849	0	0	57.5363	42.1111
DATA	1591	19	61	0	0	A_64_P144513	XR_086096	8253	314.455	7.338028e+004	7.338039e+003	72835	42	1.017018e+001	0	0	0	0	0	0	72462.4	1	1	55.8519	43.8929
DATA	1592	19	62	0	0	A_44_P325337	NM_001030041	8278.44	314.267	1.929520e+002	2.303109e+001	296	41.5	7.460649e+000	0	0	0	0	0	0	190.326	1	1	49.1849	41.375
DATA	1593	19	63	0	0	A_44_P142029	NM_001002851	8303.93	314.268	1.564485e+004	1.564536e+003	15651.5	43	7.813023e+000	0	0	0	0	0	0	15412.4	1	1	47.5395	42.28
DATA	1594	19	64	0	0	A_44_P292568	NM_001000207	8329	314.5	1.532083e+002	1.984173e+001	255.5	40	9.565365e+000	0	0	0	0	0	0	150.724	1	1	44.4243	39.6061
DATA	1595	19	65	0	0	A_42_P624092	XR_007263	8354.88	314.384	1.466333e+004	1.466388e+003	14203.5	41	1.031045e+001	0	0	0	0	0	0	14402.4	1	1	48.5334	40.7813
DATA	1596	19	66	0	0	A_42_P597322	NM_001103357	8380.36	314.316	1.162950e+003	1.169810e+002	1220.5	42	1.103224e+001	0	0	0	0	0	0	1140.28	1	1	49.1849	44.0909
DATA	1597	19	67	0	0	A_64_P034409	NM_001108146	8405.44	314.402	1.651194e+003	1.656051e+002	1718	39	4.889301e+000	0	0	0	0	0	0	1616.03	1	1	51.4001	38.7
DATA	1598	19	68	0	0	A_64_P112797	NM_001001121	8430.64	314.122	2.975720e+002	3.235365e+001	395	42.5	1.040756e+001	0	0	0	0	0	0	290.65	1	1	48.8603	41.6
DATA	1599	19	69	0	0	A_42_P761023	NM_001144870	8456.33	314.5	5.742322e+002	5.881658e+001	660	39	9.866172e+000	0	0	0	0	0	0	559.667	1	1	57.5363	39.8529
DATA	1600	19	70	0	0	A_42_P465408	NM_031647	8481.5	314.295	3.096252e+003	3.098878e+002	3056.5	44	9.744899e+000	0	0	0	0	0	0	3010.83	1	1	50.4627	40.9655
DATA	1601	19	71	0	0	A_64_P115761	NM_001109379	8506.89	314.5	6.107618e+001	1.417022e+001	165.5	37.5	1.082781e+001	0	0	0	0	0	0	59.2482	1	0	56.9804	39
DATA	1602	19	72	0	0	A_64_P086487	A_64_P086487	8532.31	314.338	1.286940e+001	1.284440e+001	113	35	9.032591e+000	0	0	0	0	0	0	7.76431	0	0	48.5334	37.3438
DATA	1603	19	73	0	0	A_42_P774028	NM_001017447	8557.74	314.453	5.985582e+003	5.986962e+002	5760	40	9.459932e+000	0	0	0	0	0	0	5776.03	1	1	52.0157	40.9032
DATA	1604	19	74	0	0	A_44_P233080	ENSRNOT00000026303	8583.18	314.411	2.136184e+004	2.136223e+003	20222	41	9.673780e+000	0	0	0	0	0	0	20556	1	1	52.6241	41.7857
DATA	1605	19	75	0	0	A_64_P078002	ENSRNOT00000056206	8608.6	314.443	4.174814e+001	1.358517e+001	146.5	38	1.176005e+001	0	0	0	0	0	0	40.0557	1	0	50.1463	40.0811
DATA	1606	19	76	0	0	A_64_P047888	A_64_P047888	8633.89	314.5	1.301768e+001	1.296701e+001	102	38	7.285919e+000	0	0	0	0	0	0	-3.71531	0	0	56.9804	37.7308
DATA	1607	19	77	0	0	A_44_P236001	NM_001000623	8659.42	314.573	1.536711e+002	2.013355e+001	251.5	39	9.082544e+000	0	0	0	0	0	0	146.531	1	1	65	39.2759
DATA	1608	19	78	0	0	A_42_P819040	TC636720	8684.58	314.573	1.978394e+001	1.319939e+001	128	42.5	8.230549e+000	0	0	0	0	0	0	18.8038	1	0	65	43
DATA	1609	19	79	0	0	A_44_P168184	NM_001166675	8710.27	314.889	5.605952e+003	5.607481e+002	5469	40	8.699584e+000	0	0	0	0	0	0	5310.24	1	1	45.1352	40.8
DATA	1610	19	80	0	0	A_64_P094925	NM_001024748	8735.63	314.675	8.382018e+002	8.484388e+001	896	40	8.515863e+000	0	0	0	0	0	0	791.23	1	1	50.7771	39.5417
DATA	1611	19	81	0	0	A_44_P332483	NM_173338	8760.58	314.573	1.323772e+001	1.318619e+001	104	43	1.006015e+001	0	0	0	0	0	0	-5.54303	0	0	65	40.96
DATA	1612	19	82	0	0	A_42_P530071	NM_001107153	8786.3	314.611	1.340593e+004	1.340658e+003	12340	39	1.036068e+001	0	0	0	0	0	0	12564	1	1	53.2255	38.9667
DATA	1613	19	83	66	1	DarkCorner	DarkCorner	8811.39	314.935	1.333523e+001	1.328333e+001	84.5	34.5	1.130299e+001	0	0	0	0	0	0	-29.4271	0	0	49.5074	36.0333
DATA	1614	19	84	66	1	DarkCorner	DarkCorner	8837.05	314.32	1.338743e+001	1.333533e+001	87	40	1.053343e+001	0	0	0	0	0	0	-27.8357	0	0	49.1849	40.1034
DATA	1615	19	85	66	1	DarkCorner	DarkCorner	8862.71	314.894	1.343921e+001	1.338690e+001	86	40	1.005818e+001	0	0	0	0	0	0	-25.3192	0	0	45.835	40.3636
DATA	1616	20	1	66	1	DarkCorner	DarkCorner	6741.75	320.389	1.563092e+001	1.557009e+001	89	36.5	9.145688e+000	0	0	0	0	0	0	-21.0567	0	0	48.2044	37.875
DATA	1617	20	2	66	1	DarkCorner	DarkCorner	6767.13	320.763	1.552378e+001	1.546336e+001	86	41.5	8.967694e+000	0	0	0	0	0	0	-23.2463	0	0	49.1849	40.1667
DATA	1618	20	3	66	1	DarkCorner	DarkCorner	6793	320.387	1.541784e+001	1.535784e+001	86	43	8.686536e+000	0	0	0	0	0	0	-23.5769	0	0	51.0895	42.5484
DATA	1619	20	4	0	0	A_42_P787775	NM_001127566	6818.61	320.634	1.441674e+003	1.449720e+002	1245.5	45	7.635015e+000	0	0	0	1	0	0	1172.38	1	1	47.8731	44.2963
DATA	1620	20	5	0	0	A_42_P607770	NM_001134616	6843.92	320.239	1.015661e+004	1.015774e+003	8093.5	45.5	1.012483e+001	0	0	0	1	0	0	8314.4	1	1	46.8651	45.4375
DATA	1621	20	6	0	0	A_42_P484738	NM_022266	6869.05	320.392	6.290070e+003	6.291871e+002	5298	43	1.169017e+001	0	0	0	0	0	0	5183.5	1	1	49.1849	44.5
DATA	1622	20	7	0	0	A_64_P075273	NM_031743	6894.5	320.5	6.535274e+002	6.704127e+001	660	47	1.145691e+001	0	0	0	0	0	0	542.159	1	1	57.5363	44.4783
DATA	1623	20	8	0	0	A_42_P674050	NM_001107225	6919.64	320.562	8.242120e+003	8.243459e+002	6811.5	49	1.249371e+001	0	0	0	1	0	0	6882.35	1	1	48.5334	50.697
DATA	1624	20	9	1028	1	(+)E1A_r60_a107	E1A_r60_a107	6945.5	320.5	1.875964e+001	1.487496e+001	126	42	7.059777e+000	0	0	0	0	0	0	15.7689	1	0	57.5363	40.0741
DATA	1625	20	10	0	0	A_64_P144253	NM_201350	6970.67	320.5	6.520518e+001	1.604661e+001	165	46	8.878063e+000	0	0	0	0	0	0	55.1618	1	0	57.5363	45.5
DATA	1626	20	11	0	0	A_44_P791729	NM_181377	6996.12	320.662	5.029117e+003	5.031226e+002	4507	46	1.404651e+001	0	0	0	0	0	0	4281.91	1	1	45.4864	49.5
DATA	1627	20	12	0	0	A_42_P550624	NM_001109319	7021.52	320.853	3.256472e+003	3.259688e+002	2799	43.5	9.479776e+000	0	0	0	0	0	0	2790.26	1	1	49.8279	43.8846
DATA	1628	20	13	0	0	A_43_P11580	NM_012833	7046.53	320.671	2.515863e+002	2.898230e+001	327.5	44	8.340654e+000	0	0	0	0	0	0	216.888	1	1	49.8279	43.931
DATA	1629	20	14	0	0	A_44_P417055	XM_223442	7072.32	320.618	2.691954e+003	2.695749e+002	2426	41	8.888906e+000	0	0	0	0	0	0	2335.18	1	1	46.5243	39.2333
DATA	1630	20	15	0	0	A_64_P142867	A_64_P142867	7097.58	320.786	1.393978e+004	1.394051e+003	12232	47	1.097846e+001	0	0	0	0	0	0	12165.5	1	1	51.4001	47.88
DATA	1631	20	16	0	0	A_64_P013002	XM_001072551	7123.11	320.5	3.504601e+001	1.455670e+001	137	47.5	1.169604e+001	0	0	0	0	0	0	30.7676	1	0	56.9804	47.9063
DATA	1632	20	17	0	0	A_42_P457692	NM_001008363	7148.69	320.689	6.793372e+003	6.794824e+002	5957	43	1.313349e+001	0	0	0	1	0	0	5999.41	1	1	48.2044	44.6364
DATA	1633	20	18	0	0	A_42_P788480	NM_019194	7173.75	320.644	1.911728e+004	1.911779e+003	16874.5	45	5.509962e+000	0	0	0	0	0	0	16978.8	1	1	48.5334	43.7826
DATA	1634	20	19	0	0	A_42_P518462	NM_001007020	7199.27	320.863	1.810742e+004	1.810796e+003	16197.5	44	9.327379e+000	0	0	0	0	0	0	16173.6	1	1	48.2044	46.3333
DATA	1635	20	20	0	0	A_64_P007578	NM_001000851	7224.33	321.039	2.683646e+001	1.406951e+001	133.5	43	5.010811e+000	0	0	0	0	0	0	24.1016	1	0	49.1849	44.1818
DATA	1636	20	21	0	0	A_64_P139350	NM_001191727	7250.09	320.614	1.393865e+002	1.956982e+001	234.5	42.5	9.870792e+000	0	0	0	0	0	0	125.862	1	1	57.259	41.6071
DATA	1637	20	22	0	0	A_64_P100442	ENSRNOT00000067861	7275.15	321.194	2.252646e+002	2.634685e+001	313	38	7.639738e+000	0	0	0	0	0	0	204.482	1	1	45.1352	38.9677
DATA	1638	20	23	1028	1	(+)E1A_r60_a135	E1A_r60_a135	7300.58	320.573	1.364819e+001	1.359507e+001	107.5	41.5	9.253269e+000	0	0	0	0	0	0	-4.47678	0	0	57.5363	41.7941
DATA	1639	20	24	0	0	A_44_P459760	NM_001108187	7326.42	320.573	1.160404e+002	1.782145e+001	209.5	40	9.719286e+000	0	0	0	0	0	0	106.413	1	1	57.5363	41.2581
DATA	1640	20	25	0	0	A_64_P115536	NM_212545	7351.5	320.648	6.488303e+001	1.494291e+001	171	39	8.686154e+000	0	0	0	0	0	0	59.7878	1	0	57.5363	40.1667
DATA	1641	20	26	0	0	A_44_P538406	NM_013102	7377.23	321.273	2.151670e+004	2.151712e+003	19571	39	1.051763e+001	0	0	0	0	0	0	19923.7	1	1	45.4864	39.5652
DATA	1642	20	27	0	0	A_64_P120871	NM_198743	7402.37	321	2.203289e+003	2.207321e+002	2055	39	8.761085e+000	0	0	0	0	0	0	2049.42	1	1	50.4627	38.3571
DATA	1643	20	28	0	0	A_44_P173048	NM_001009255	7427.85	320.955	4.594775e+003	4.596692e+002	4319	36	1.057264e+001	0	0	0	0	0	0	4293.03	1	1	46.5243	37.7742
DATA	1644	20	29	0	0	A_64_P058060	NM_001037541	7453.06	320.969	4.185444e+001	1.386564e+001	146	41	1.105824e+001	0	0	0	0	0	0	39.2735	1	0	45.835	42.7308
DATA	1645	20	30	0	0	A_64_P145982	NM_001109366	7478.5	321	6.701363e+001	1.477144e+001	172	41.5	1.106666e+001	0	0	0	0	0	0	63.1439	1	1	54.1152	42.2143
DATA	1646	20	31	0	0	A_42_P514244	NM_012791	7504	321	1.035458e+003	1.043725e+002	1086.5	42	1.084978e+001	0	0	0	0	0	0	979.599	1	1	54.9904	43.0303
DATA	1648	20	33	0	0	A_64_P159155	XM_001071429	7554.46	321.042	3.801878e+001	1.355698e+001	145	39	1.002706e+001	0	0	0	0	0	0	36.2388	1	0	48.2044	40.5517
DATA	1649	20	34	0	0	A_64_P030272	ENSRNOT00000041731	7580.1	321.188	1.974960e+002	2.362573e+001	304.5	39.5	1.089846e+001	0	0	0	0	0	0	188.925	1	1	46.8651	41.5357
DATA	1650	20	35	0	0	A_42_P733076	NM_001033867	7605.69	321.194	1.268253e+003	1.274819e+002	1289	46	1.526244e+001	0	0	0	0	0	0	1217.35	1	1	47.8731	48.5278
DATA	1651	20	36	0	0	A_44_P349475	NM_031333	7630.82	321.311	4.007312e+003	4.009382e+002	3838	45.5	1.452212e+001	0	0	0	0	0	0	3858.74	1	1	48.8603	47.2778
DATA	1652	20	37	0	0	A_64_P009848	NM_001034135	7656.65	320.862	1.277172e+004	1.277237e+003	12279	42	1.084270e+001	0	0	0	0	0	0	12335.9	1	1	45.4864	43.4444
DATA	1653	20	38	0	0	A_64_P116685	NM_001166763	7681.71	320.833	3.579029e+003	3.581320e+002	3573	45	1.317753e+001	0	0	0	0	0	0	3466.75	1	1	45.835	47.2258
DATA	1654	20	39	0	0	A_64_P072659	NM_001109296	7707	321.071	2.929693e+003	2.932475e+002	2978	45	8.994357e+000	0	0	0	0	0	0	2845.51	1	1	43.3362	44.4615
DATA	1655	20	40	0	0	A_42_P808442	NM_001108759	7732.7	321.1	2.066859e+003	2.070780e+002	2077	41.5	9.315726e+000	0	0	0	0	0	0	2012.65	1	1	47.2035	41.1
DATA	1656	20	41	0	0	A_64_P140836	NM_001017486	7758.01	321.368	3.767622e+002	3.976150e+001	468.5	42	6.684500e+000	0	0	0	0	0	0	367.757	1	1	46.1809	43.3571
DATA	1657	20	42	0	0	A_64_P034384	NM_019227	7783.26	321.222	1.455402e+003	1.460915e+002	1544	41	7.593418e+000	0	0	0	0	0	0	1423.72	1	1	47.5395	39.92
DATA	1658	20	43	0	0	A_42_P730411	NM_001012181	7808.69	321.465	4.001604e+003	4.003605e+002	3970	39	8.891829e+000	0	0	0	0	0	0	3922.52	1	1	47.8731	38.2308
DATA	1659	20	44	0	0	A_44_P396450	ENSRNOT00000018433	7834	321.455	7.467344e+002	7.573407e+001	821.5	43	9.099214e+000	0	0	0	0	0	0	733.335	1	1	55.8519	42.9355
DATA	1660	20	45	0	0	A_44_P268610	NM_001109134	7859.7	321.1	9.618534e+003	9.619361e+002	9273	42	6.207935e+000	0	0	0	0	0	0	9461.86	1	1	47.2035	40.3333
DATA	1661	20	46	0	0	A_64_P059105	NM_001134544	7884.99	321.214	3.219349e+002	3.456775e+001	419.5	38	5.414858e+000	0	0	0	0	0	0	317.171	1	1	46.8651	38.7
DATA	1662	20	47	0	0	A_42_P524851	NM_001130061	7910.52	321.362	2.268291e+003	2.271773e+002	2272	40	8.545504e+000	0	0	0	0	0	0	2237.76	1	1	47.5395	39.4444
DATA	1663	20	48	0	0	A_64_P141675	FM127585	7935.81	321.353	9.910249e+003	9.911045e+002	9679	41	8.978244e+000	0	0	0	0	0	0	9788.2	1	1	46.8651	40.8125
DATA	1664	20	49	0	0	A_64_P002979	ENSRNOT00000034762	7961	321.455	1.259494e+001	1.254593e+001	105	44.5	9.612808e+000	0	0	0	0	0	0	0.127286	0	0	55.8519	45.4643
DATA	1665	20	50	0	0	A_44_P175822	NM_001109511	7986.44	321.534	3.673503e+002	3.881497e+001	466	40.5	1.218505e+001	0	0	0	0	0	0	363.487	1	1	49.1849	42.3462
DATA	1666	20	51	0	0	A_44_P1008751	NM_001137645	8011.73	321.592	4.441240e+002	4.614539e+001	544	39	9.252234e+000	0	0	0	0	0	0	439.739	1	1	47.8731	39.4063
DATA	1667	20	52	0	0	A_44_P255350	NM_001007674	8037.19	321.725	9.606526e+002	9.687785e+001	1045	37.5	7.620620e+000	0	0	0	0	0	0	951.63	1	1	46.8651	38.9231
DATA	1668	20	53	0	0	A_64_P017328	NM_012758	8062.34	320.966	6.483652e+002	6.603390e+001	776	40	7.615773e+000	0	0	0	0	0	0	642.444	1	1	43.3362	40
DATA	1669	20	54	0	0	A_64_P132571	NM_001107703	8087.94	321.462	8.874454e+003	8.875337e+002	8923	41	9.043499e+000	0	0	0	0	0	0	8794.86	1	1	44.7812	40.2571
DATA	1670	20	55	0	0	A_44_P107535	NM_001170336	8113.5	321.471	2.095206e+003	2.098941e+002	2156	40	1.032535e+001	0	0	0	0	0	0	2076.35	1	1	47.2035	41.2903
DATA	1671	20	56	0	0	A_44_P353618	NM_053587	8138.58	321.573	6.701485e+002	6.817412e+001	772	44	1.037853e+001	0	0	0	0	0	0	663.988	1	1	57.5363	43.7742
DATA	1672	20	57	0	0	A_44_P213336	A_44_P213336	8164.41	321.429	2.873987e+002	3.134997e+001	391	39	5.724574e+000	0	0	0	0	0	0	284.648	1	1	47.8731	38.0435
DATA	1673	20	58	0	0	A_42_P507072	FQ213070	8189.87	321.623	1.931280e+004	1.931320e+003	18965.5	38.5	9.419705e+000	0	0	0	0	0	0	19117.9	1	1	46.8651	40.2353
DATA	1674	20	59	0	0	A_44_P428886	NM_001099516	8215.01	321.879	3.647201e+002	3.856716e+001	465	38	7.914776e+000	0	0	0	0	0	0	360.794	1	1	46.5243	38.3333
DATA	1675	20	60	0	0	A_64_P086784	NM_001108657	8240.6	321.84	9.229066e+003	9.229919e+002	8939	46	9.741318e+000	0	0	0	0	0	0	9121.8	1	1	49.1849	46.4348
DATA	1676	20	61	0	0	A_42_P654682	NM_012724	8265.58	321.573	2.466092e+003	2.469289e+002	2564	41	4.917264e+000	0	0	0	0	0	0	2434.95	1	1	57.5363	40.5556
DATA	1677	20	62	0	0	A_44_P443008	NM_001013068	8291.36	321.547	2.221652e+003	2.225209e+002	2270	42.5	8.075795e+000	0	0	0	0	0	0	2190.97	1	1	45.1352	42.4615
DATA	1678	20	63	0	0	A_64_P027229	A_64_P027229	8316.31	321.641	1.196738e+003	1.203346e+002	1290	39	5.632014e+000	0	0	0	0	0	0	1178.67	1	1	44.4243	39.3571
DATA	1679	20	64	0	0	A_64_P134277	ENSRNOT00000029167	8341.86	321.593	1.487535e+002	1.950271e+001	252	38	8.047306e+000	0	0	0	0	0	0	146.289	1	1	56.9804	38.3226
DATA	1680	20	65	0	0	A_64_P165548	XM_001055860	8367.42	321.573	1.704951e+002	2.122006e+001	273	38	8.730788e+000	0	0	0	0	0	0	167.394	1	1	57.5363	39.32
DATA	1681	20	66	0	0	A_64_P014737	NM_001000069	8392.42	321.851	1.270494e+001	1.269324e+001	114	38	4.407191e+000	0	0	0	0	0	0	9.58772	0	0	48.5334	38.56
DATA	1682	20	67	0	0	A_42_P627330	NM_001106628	8418.16	321.882	2.687683e+003	2.690673e+002	2764	39	7.820092e+000	0	0	0	0	0	0	2629.07	1	1	46.5243	41.3333
DATA	1683	20	68	0	0	A_64_P039452	NM_001109063	8443.43	322.032	4.736952e+002	4.904408e+001	571.5	39	1.086348e+001	0	0	0	0	0	0	462.415	1	1	44.0646	39.7188
DATA	1684	20	69	0	0	A_44_P516885	ENSRNOT00000005601	8468.63	321.596	7.106481e+004	7.106492e+003	69108	40	8.661127e+000	0	0	0	0	0	0	69218.6	1	1	57.8122	40.2188
DATA	1685	20	70	0	0	A_44_P839176	NM_001107114	8494.38	321.476	4.770695e+003	4.772402e+002	4744	42.5	1.119973e+001	0	0	0	0	0	0	4635.67	1	1	51.7088	42.0769
DATA	1686	20	71	0	0	A_64_P083342	AABR03026150	8519.39	321.943	3.567565e+001	1.328381e+001	141	35.5	9.802650e+000	0	0	0	0	0	0	34.5825	1	0	47.2035	38.3333
DATA	1687	20	72	0	0	A_42_P618185	NM_001108486	8545.19	321.974	4.381427e+003	4.383305e+002	4226.5	39	9.594921e+000	0	0	0	0	0	0	4235.95	1	1	49.1849	40
DATA	1688	20	73	0	0	A_42_P619957	NM_053830	8570.66	321.958	1.113374e+003	1.120782e+002	1175	43.5	6.358693e+000	0	0	0	0	0	0	1073.46	1	1	46.8651	43.2083
DATA	1689	20	74	0	0	A_44_P375042	NM_001014243	8595.5	322	9.676043e+002	9.761666e+001	1025	42.5	1.236683e+001	0	0	0	0	0	0	930.316	1	1	54.1152	41.9706
DATA	1690	20	75	0	0	A_44_P438053	NM_001004201	8621.3	321.791	2.058132e+002	2.431123e+001	312	38	1.077252e+001	0	0	0	0	0	0	197.283	1	1	45.835	39.7941
DATA	1691	20	76	0	0	A_43_P19181	ENSRNOT00000018440	8646.78	321.866	5.232142e+002	5.390746e+001	607.5	37	8.790211e+000	0	0	0	0	0	0	499.981	1	1	46.1809	37.963
DATA	1692	20	77	0	0	A_42_P664259	NM_024396	8672.05	321.907	5.690334e+004	5.690349e+003	53800.5	42	9.817171e+000	0	0	0	0	0	0	54204.2	1	1	46.8651	43.6552
DATA	1693	20	78	0	0	A_44_P588645	FQ230244	8697.41	321.913	6.574566e+002	6.703110e+001	729	45.5	1.017642e+001	0	0	0	0	0	0	624.213	1	1	49.8279	44.6786
DATA	1694	20	79	0	0	A_64_P030844	XM_001065657	8722.73	321.746	1.316125e+001	1.317469e+001	121	40	9.060461e+000	0	0	0	0	0	0	12.4534	1	0	45.1352	41.3333
DATA	1695	20	80	0	0	A_64_P054823	A_64_P054823	8748.37	321.735	3.449843e+004	3.449868e+003	31948.5	42.5	8.197904e+000	0	0	0	0	0	0	32528	1	1	46.5243	41.5909
DATA	1696	20	81	0	0	A_42_P516860	XM_001059330	8773.5	322.352	1.252994e+002	1.820073e+001	231.5	41	8.552811e+000	0	0	0	0	0	0	117.732	1	1	57.5363	39.5667
DATA	1697	20	82	0	0	A_64_P085772	NM_001191606	8798.91	322.386	3.022761e+002	3.300389e+001	397	35	1.011865e+001	0	0	0	0	0	0	282.981	1	1	57.259	34.75
DATA	1698	20	83	66	1	DarkCorner	DarkCorner	8824.76	322.222	1.335223e+001	1.330026e+001	81.5	36	5.753483e+000	0	0	0	0	0	0	-29.0121	0	0	48.2044	36.7778
DATA	1699	20	84	66	1	DarkCorner	DarkCorner	8849.47	322.386	1.340168e+001	1.334952e+001	84	41.5	1.097798e+001	0	0	0	0	0	0	-30.1452	0	0	47.5395	41.6333
DATA	1700	20	85	66	1	DarkCorner	DarkCorner	8875.26	322.083	1.345508e+001	1.340272e+001	95	35	8.541345e+000	0	0	0	0	0	0	-21.257	0	0	47.8731	35.2308
DATA	1701	21	1	66	1	DarkCorner	DarkCorner	6729.05	327.468	1.566315e+001	1.560219e+001	91.5	34	8.398343e+000	0	0	0	0	0	0	-18.831	0	0	50.4627	34.8232
DATA	1702	21	2	66	1	DarkCorner	DarkCorner	6754.87	327.463	1.555541e+001	1.549486e+001	90	35	6.813806e+000	0	0	0	0	0	0	-20.6803	0	0	51.0895	35.8065
DATA	1703	21	3	66	1	DarkCorner	DarkCorner	6780.12	327.459	1.545100e+001	1.539086e+001	83	42	1.004056e+001	0	0	0	0	0	0	-24.6638	0	0	48.8603	40.7097
DATA	1704	21	4	0	0	A_44_P277669	NM_001163736	6805.64	328.129	1.140243e+003	1.150442e+002	1022	43.5	1.182936e+001	0	0	0	0	0	0	925.301	1	1	46.8651	43.4231
DATA	1705	21	5	0	0	A_42_P788480	NM_019194	6830.95	327.392	1.973379e+004	1.973437e+003	15954	47	9.654544e+000	0	0	0	0	0	0	16119.3	1	1	49.1849	45.9091
DATA	1706	21	6	0	0	A_42_P558354	NM_001007686	6856.55	327.622	7.478870e+003	7.480391e+002	6030.5	46.5	1.138405e+001	0	0	0	0	0	0	6150.52	1	1	49.1849	46.3
DATA	1707	21	7	0	0	A_44_P714409	NM_001047907	6881.8	327.761	9.047262e+003	9.048502e+002	7390.5	47	1.079784e+001	0	0	0	0	0	0	7489.74	1	1	46.8651	45.52
DATA	1708	21	8	0	0	A_42_P604331	NM_001108533	6907.06	327.526	1.171610e+005	1.171611e+004	97975	50	1.319718e+001	0	0	0	0	0	0	97624.6	1	1	50.4627	48.9677
DATA	1709	21	9	0	0	A_64_P139472	NM_173119	6932.56	327.973	1.240731e+004	1.240819e+003	10287	45.5	1.229768e+001	0	0	0	0	0	0	10407.1	1	1	48.5334	46.8438
DATA	1710	21	10	0	0	A_42_P711589	NM_022948	6957.93	327.732	1.172381e+004	1.172473e+003	9852	42	7.382412e+000	0	0	0	0	0	0	9897.11	1	1	47.5395	41
DATA	1711	21	11	0	0	A_42_P813567	NM_031841	6983.5	327.648	1.646862e+005	1.646863e+004	141272	45	1.027865e+001	0	0	0	1	0	0	139922	1	1	57.5363	47.0667
DATA	1712	21	12	0	0	A_42_P647505	TC640289	7008.77	327.884	6.618816e+003	6.620405e+002	5666.5	44.5	1.547509e+001	0	0	0	1	0	0	5659.22	1	1	46.5243	48.9615
DATA	1713	21	13	0	0	A_64_P094313	NM_032073	7034	328	1.254893e+003	1.263147e+002	1188.5	44	7.342012e+000	0	0	0	0	0	0	1079.65	1	1	46.8651	44.2174
DATA	1714	21	14	0	0	A_42_P577421	NM_001106819	7059.34	327.909	4.884087e+002	5.089940e+001	518	44	9.476510e+000	0	0	0	0	0	0	422.787	1	1	49.1849	43.2143
DATA	1715	21	15	0	0	A_42_P477311	NM_001013170	7084.91	327.896	1.478465e+004	1.478534e+003	13123	41	9.647638e+000	0	0	0	0	0	0	12876.6	1	1	46.8651	40.3333
DATA	1716	21	16	0	0	A_42_P630249	NM_031824	7110.19	327.988	5.661470e+003	5.663240e+002	4961.5	48.5	1.114229e+001	0	0	0	0	0	0	4960.29	1	1	49.1849	49.0294
DATA	1717	21	17	0	0	A_42_P618256	NM_001024759	7135.84	327.897	1.994132e+003	1.999092e+002	1827	45.5	1.211700e+001	0	0	0	0	0	0	1757.53	1	1	46.5243	46.7813
DATA	1718	21	18	0	0	A_64_P101584	A_64_P101584	7161.5	328	7.551053e+002	7.679586e+001	781	42.5	8.546403e+000	0	0	0	0	0	0	669.412	1	1	54.1152	40.6786
DATA	1719	21	19	0	0	A_64_P045461	NM_001106750	7186.5	328	3.160706e+002	3.453404e+001	393	45	1.046987e+001	0	0	0	0	0	0	281.767	1	1	54.1152	45.2414
DATA	1720	21	20	0	0	A_64_P056485	ENSRNOT00000033663	7211.91	328.104	4.488424e+003	4.490557e+002	4046	44	8.939971e+000	0	0	0	0	0	0	4023.61	1	1	46.8651	46
DATA	1721	21	21	0	0	A_64_P013077	A_64_P013077	7237.5	328.352	4.666076e+002	4.864754e+001	526	44	9.039230e+000	0	0	0	0	0	0	420.594	1	1	57.5363	44.1786
DATA	1722	21	22	0	0	A_44_P348952	NM_001000368	7262.58	328.427	1.374210e+001	1.369124e+001	111.5	42	8.808708e+000	0	0	0	0	0	0	2.42742	0	0	57.5363	41.52
DATA	1723	21	23	0	0	A_64_P147609	NM_001106295	7288.13	328.243	9.920415e+003	9.921349e+002	9087.5	40.5	8.343281e+000	0	0	0	0	0	0	9036.04	1	1	46.5243	41.9
DATA	1724	21	24	0	0	A_44_P193928	NM_183328	7313.67	328.261	2.629697e+003	2.633185e+002	2483.5	44	9.808074e+000	0	0	0	0	0	0	2407.48	1	1	47.2035	42.9143
DATA	1725	21	25	0	0	A_44_P441947	XM_001079870	7339.18	328.347	4.379512e+003	4.381587e+002	4218.5	44	7.999713e+000	0	0	0	0	0	0	4029.35	1	1	47.5395	42.7333
DATA	1726	21	26	0	0	A_42_P666259	NM_001009661	7364.31	328.338	1.614704e+004	1.614760e+003	14680	41	6.684298e+000	0	0	0	0	0	0	14926.6	1	1	48.5334	40.9565
DATA	1727	21	27	0	0	A_64_P082486	A_64_P082486	7389.43	328.392	1.496821e+003	1.502768e+002	1494.5	42	1.506271e+001	0	0	0	0	0	0	1390.07	1	1	49.1849	44.6087
DATA	1728	21	28	0	0	A_64_P091940	NM_033237	7415.18	328.368	4.115773e+002	4.325189e+001	474.5	38	9.069623e+000	0	0	0	0	0	0	383.975	1	1	49.5074	39.75
DATA	1729	21	29	0	0	A_64_P144899	NM_001107736	7440.43	327.701	2.016939e+003	2.021279e+002	2003	41	8.351433e+000	0	0	0	0	0	0	1889.73	1	1	46.1809	40.8519
DATA	1730	21	30	0	0	A_44_P410062	XM_224553	7466.09	328.104	1.964392e+003	1.968810e+002	1976	45.5	9.781020e+000	0	0	0	0	0	0	1848.43	1	1	46.8651	44.5938
DATA	1731	21	31	0	0	A_42_P489764	NM_001004099	7491.43	328.103	2.482331e+004	2.482366e+003	22855.5	41	1.011262e+001	0	0	0	0	0	0	23452.8	1	1	46.5243	40.8438
DATA	1732	21	32	0	0	A_42_P640277	NM_001003401	7516.66	328.122	4.783486e+004	4.783504e+003	45119	43	8.094090e+000	0	0	0	0	0	0	45370	1	1	48.8603	43.2857
DATA	1733	21	33	0	0	A_44_P212850	NM_019305	7542.11	328.5	9.316625e+001	1.601652e+001	194	39	7.647322e+000	0	0	0	0	0	0	88.7017	1	1	56.9804	39.1923
DATA	1734	21	34	0	0	A_64_P125506	NM_021677	7567.5	328.5	3.040625e+002	3.306134e+001	409	43	1.135999e+001	0	0	0	0	0	0	290.535	1	1	57.5363	44.129
DATA	1735	21	35	0	0	A_42_P802358	NM_001024341	7592.76	328.582	1.268970e+004	1.269036e+003	11824	45	9.869504e+000	0	0	0	0	0	0	12166.8	1	1	53.2255	43.9565
DATA	1736	21	36	0	0	A_44_P552852	XM_346367	7618.33	328.5	1.294461e+001	1.289455e+001	108	46	1.663817e+001	0	0	0	0	0	0	0.874747	0	0	57.5363	48.7714
DATA	1738	21	38	0	0	A_64_P141187	NM_001108899	7669.11	328.5	1.342355e+002	1.855934e+001	233.5	42	1.090548e+001	0	0	0	0	0	0	129.914	1	1	56.9804	44.2
DATA	1739	21	39	0	0	A_44_P274823	NM_001105831	7694.44	328.479	8.465602e+003	8.466566e+002	8123	48	1.235771e+001	0	0	0	0	0	0	8215.85	1	1	48.2044	47.75
DATA	1740	21	40	0	0	A_42_P804913	ENSRNOT00000022886	7719.92	328.467	2.828299e+002	3.102290e+001	382	45	9.581404e+000	0	0	0	0	0	0	275.207	1	1	48.8603	43.4054
DATA	1741	21	41	0	0	A_64_P113970	NM_212501	7745.43	328.392	3.384405e+003	3.386793e+002	3378	41	7.015792e+000	0	0	0	0	0	0	3301.28	1	1	49.1849	40.6957
DATA	1742	21	42	1028	1	(+)E1A_r60_3	E1A_r60_3	7770.5	328.5	4.795333e+001	1.356336e+001	156	41	7.080640e+000	0	0	0	0	0	0	46.8812	1	0	57.5363	40.7241
DATA	1743	21	43	0	0	A_42_P661992	TC596141	7796	328.545	4.754361e+002	4.920044e+001	574	40	1.010621e+001	0	0	0	0	0	0	465.793	1	1	55.8519	39.7241
DATA	1744	21	44	0	0	A_42_P577431	NM_001109422	7821.39	328.718	4.715790e+002	4.882144e+001	569	44.5	1.279134e+001	0	0	0	0	0	0	462.915	1	1	47.8731	45.5385
DATA	1745	21	45	0	0	A_44_P524785	NM_001000184	7846.58	328.573	1.266318e+001	1.265397e+001	114.5	44	8.604170e+000	0	0	0	0	0	0	9.89574	0	0	57.5363	45.5714
DATA	1746	21	46	0	0	A_64_P027634	NM_001000223	7872.21	328.44	8.728615e+001	1.532288e+001	191	38	6.217907e+000	0	0	0	0	0	0	85.9692	1	1	49.1849	39.9355
DATA	1747	21	47	0	0	A_42_P492976	NM_001126099	7897.89	328.648	1.826858e+003	1.831181e+002	1882	38	4.000000e+000	0	0	0	0	0	0	1801.9	1	1	47.8731	37.8
DATA	1748	21	48	0	0	A_64_P157479	AABR03127998	7923.12	328.662	8.484505e+003	8.485435e+002	8463	41	7.912078e+000	0	0	0	0	0	0	8378.96	1	1	45.4864	41.3793
DATA	1749	21	49	0	0	A_44_P391706	NM_001007796	7948.69	328.686	9.729889e+002	9.810447e+001	1060	44	7.198908e+000	0	0	0	0	0	0	961.926	1	1	47.5395	43.5417
DATA	1750	21	50	0	0	A_44_P184685	NM_001007735	7973.77	328.884	4.595805e+002	4.763686e+001	546	42.5	1.061436e+001	0	0	0	0	0	0	454.765	1	1	46.5243	44.2308
DATA	1751	21	51	0	0	A_44_P475275	NM_001000893	7998.83	328.7	1.374318e+002	1.859515e+001	241	41.5	9.518223e+000	0	0	0	0	0	0	136.088	1	1	47.2035	41.1786
DATA	1752	21	52	0	0	A_44_P270056	NM_001007800	8024.64	328.598	7.996844e+002	8.094244e+001	879.5	38	8.696366e+000	0	0	0	0	0	0	792.314	1	1	52.3208	39.6296
DATA	1753	21	53	0	0	A_64_P059351	NM_001145175	8049.63	328.596	1.648764e+002	2.069904e+001	270.5	35.5	8.178277e+000	0	0	0	0	0	0	163.419	1	1	57.8122	37.4
DATA	1754	21	54	0	0	A_42_P573441	NM_001105742	8075.39	328.5	1.358838e+004	1.358895e+003	13377	42.5	9.803088e+000	0	0	0	0	0	0	13471.2	1	1	48.5334	42.7857
DATA	1755	21	55	0	0	A_42_P485589	NM_017246	8100.79	328.757	7.318634e+002	7.424797e+001	805.5	43	1.076059e+001	0	0	0	0	0	0	725.598	1	1	46.8651	41.375
DATA	1756	21	56	0	0	A_44_P149540	XM_223051	8126.14	328.855	4.652870e+004	4.652887e+003	45657	44	1.073918e+001	0	0	0	0	0	0	46125.2	1	1	47.8731	43.4828
DATA	1757	21	57	0	0	A_44_P323236	NM_001000513	8151.36	328.819	3.553172e+001	1.301039e+001	141	42	1.000333e+001	0	0	0	0	0	0	35.2135	1	0	47.8731	45
DATA	1759	21	59	0	0	A_64_P100447	NM_001173469	8202.09	328.824	1.827263e+001	1.266164e+001	121	38	9.753411e+000	0	0	0	0	0	0	18.0898	1	0	46.5243	40.0645
DATA	1760	21	60	0	0	A_64_P150008	A_64_P150008	8227.5	329	1.584477e+002	2.020583e+001	260	41	9.945046e+000	0	0	0	0	0	0	156.742	1	1	54.1152	41.7586
DATA	1761	21	61	0	0	A_42_P481696	NM_022508	8253.24	329	5.090097e+003	5.091644e+002	5191	42	9.047652e+000	0	0	0	0	0	0	5030.52	1	1	46.8651	42.88
DATA	1762	21	62	0	0	A_64_P033755	AABR03073220	8278.44	329.015	1.322400e+002	1.824100e+001	236	43	7.097562e+000	0	0	0	0	0	0	130.55	1	1	47.5395	44.1538
DATA	1763	21	63	0	0	A_64_P115980	NM_001109458	8303.7	328.9	3.548787e+002	3.765162e+001	452	40	1.111970e+001	0	0	0	0	0	0	349.907	1	1	47.2035	40.8276
DATA	1764	21	64	0	0	A_64_P001426	NM_001126301	8329.44	328.972	5.969237e+002	6.100725e+001	678	42	6.990931e+000	0	0	0	0	0	0	587.726	1	1	48.2044	41.1613
DATA	1765	21	65	0	0	A_64_P012987	NM_001108668	8354.73	328.643	3.609199e+003	3.611404e+002	3532	40	9.569472e+000	0	0	0	0	0	0	3548.02	1	1	46.8651	39.6857
DATA	1767	21	67	0	0	A_42_P668289	TC585832	8405.63	329	7.451533e+003	7.452609e+002	7254	41	9.951575e+000	0	0	0	0	0	0	7299.32	1	1	48.5334	41.9231
DATA	1768	21	68	0	0	A_64_P052690	ENSRNOT00000036634	8430.91	329.104	2.372822e+003	2.376211e+002	2388	38	1.021656e+001	0	0	0	0	0	0	2319.76	1	1	46.8651	40.0333
DATA	1769	21	69	0	0	A_42_P593020	NM_013413	8456.42	329.427	1.365039e+002	1.865446e+001	239	41.5	8.691983e+000	0	0	0	0	0	0	133.168	1	1	57.5363	40.6333
DATA	1770	21	70	0	0	A_64_P037303	NM_001127530	8481.92	328.567	1.208090e+003	1.214794e+002	1243	38	8.005745e+000	0	0	0	0	0	0	1175.82	1	1	45.835	38.6667
DATA	1771	21	71	0	0	A_44_P684180	NM_001037363	8507.23	328.727	6.973940e+003	6.975110e+002	6792.5	41	1.016061e+001	0	0	0	0	0	0	6771.49	1	1	45.4864	40.8571
DATA	1772	21	72	0	0	A_64_P104743	NM_133518	8532.42	329.427	4.234705e+002	4.424103e+001	519	39	9.546530e+000	0	0	0	0	0	0	410.165	1	1	57.5363	40.8929
DATA	1773	21	73	0	0	A_44_P941132	NM_001108128	8558.07	329	1.627400e+004	1.627450e+003	15864	45	1.099485e+001	0	0	0	0	0	0	15719.9	1	1	46.8651	45.6207
DATA	1774	21	74	0	0	A_44_P187080	NM_001110823	8583.42	328.901	4.964388e+004	4.964405e+003	47175	42.5	1.043168e+001	0	0	0	0	0	0	47820.4	1	1	47.8731	42.5
DATA	1775	21	75	0	0	A_42_P574960	ENSRNOT00000068719	8608.5	329.5	3.266109e+003	3.268661e+002	3240	38	1.245888e+001	0	0	0	0	0	0	3137.29	1	1	57.5363	39.5588
DATA	1776	21	76	0	0	A_64_P094850	A_64_P094850	8633.94	328.825	1.140511e+002	1.725830e+001	216	36	7.549508e+000	0	0	0	0	0	0	109.217	1	1	45.4864	35.931
DATA	1777	21	77	0	0	A_43_P13418	NM_172042	8659.63	329	1.279531e+004	1.279597e+003	12234	41.5	9.489888e+000	0	0	0	0	0	0	12214.5	1	1	48.5334	40.8333
DATA	1778	21	78	66	-1	(-)3xSLv1	NegativeControl	8684.58	329.427	1.308524e+001	1.303431e+001	83.5	41	8.457224e+000	0	0	0	0	0	0	-23.6428	0	0	65	43.1034
DATA	1779	21	79	0	0	A_44_P321594	ENSRNOT00000006966	8710.11	329.5	6.739814e+001	1.471245e+001	175	39	8.388621e+000	0	0	0	0	0	0	63.9237	1	1	65	41.1
DATA	1780	21	80	0	0	A_44_P792531	NM_001025700	8735.63	329.127	9.094257e+002	9.188457e+001	979	41	8.935973e+000	0	0	0	0	0	0	859.554	1	1	47.5395	42.4194
DATA	1781	21	81	0	0	A_43_P14795	NM_001044248	8760.84	329.329	5.771469e+003	5.772971e+002	5450	40.5	6.756831e+000	0	0	0	0	0	0	5436.07	1	1	48.2044	40.1071
DATA	1782	21	82	0	0	A_42_P671502	NM_053467	8786.5	329.5	1.493032e+004	1.493090e+003	14000.5	40	6.895240e+000	0	0	0	0	0	0	14011.8	1	1	49.1849	39.5172
DATA	1783	21	83	66	1	DarkCorner	DarkCorner	8811.38	329.31	1.331661e+001	1.326478e+001	85	36.5	9.210112e+000	0	0	0	0	0	0	-26.9995	0	0	52.3208	35.8846
DATA	1784	21	84	66	1	DarkCorner	DarkCorner	8836.56	329.05	1.336664e+001	1.331462e+001	82.5	41.5	8.504478e+000	0	0	0	0	0	0	-29.8423	0	0	50.4627	40.3846
DATA	1785	21	85	66	1	DarkCorner	DarkCorner	8862.71	329.147	1.341928e+001	1.336705e+001	92	40	1.082270e+001	0	0	0	0	0	0	-22.2631	0	0	49.1849	40.641
DATA	1786	22	1	66	1	DarkCorner	DarkCorner	6742.5	335	1.558473e+001	1.552407e+001	90	35	9.430987e+000	0	0	0	0	0	0	-19.6144	0	0	54.1152	37.093
DATA	1787	22	2	66	1	DarkCorner	DarkCorner	6767.5	335.265	1.548074e+001	1.542049e+001	91	40	1.011541e+001	0	0	0	0	0	0	-19.3186	0	0	46.5243	39.6071
DATA	1788	22	3	66	1	DarkCorner	DarkCorner	6792.58	335.064	1.537878e+001	1.531893e+001	86	44.5	8.303897e+000	0	0	0	0	0	0	-23.9888	0	0	49.5074	44.5417
DATA	1789	22	4	0	0	A_42_P704824	NM_001009640	6818.53	335.12	9.075165e+002	9.201811e+001	835	45	9.915334e+000	0	0	0	0	0	0	739.872	1	1	48.8603	45.0769
DATA	1790	22	5	0	0	A_42_P517554	NM_001107060	6843.75	335	5.729173e+002	5.925184e+001	567	46	9.297998e+000	0	0	0	0	0	0	470.175	1	1	49.1849	44.8235
DATA	1791	22	6	0	0	A_42_P586883	NM_001106416	6869.4	334.829	2.179738e+002	2.646770e+001	289.5	47	1.348736e+001	0	0	0	0	0	0	180.08	1	1	47.2035	46.8621
DATA	1792	22	7	0	0	A_64_P060302	BF559343	6894.53	334.847	9.547622e+002	9.663439e+001	878	50	1.300087e+001	0	0	0	0	0	0	793.936	1	1	47.8731	48.0909
DATA	1793	22	8	0	0	A_64_P055418	NM_001025641	6919.91	335.386	2.086077e+001	1.496417e+001	122.5	50.5	1.391909e+001	0	0	0	0	0	0	17.4619	1	0	57.259	51.5313
DATA	1794	22	9	0	0	A_44_P317600	NM_012612	6945.42	335.427	2.976310e+002	3.320513e+001	356.5	43	1.354080e+001	0	0	0	0	0	0	250.762	1	1	57.5363	44.7407
DATA	1795	22	10	0	0	A_44_P433359	NM_022710	6970.58	335.427	7.102431e+002	7.251524e+001	707	43	9.149190e+000	0	0	0	0	0	0	602.205	1	1	57.5363	44.8214
DATA	1796	22	11	0	0	A_42_P788480	NM_019194	6996.36	334.871	1.621484e+004	1.621549e+003	13828	44.5	1.039142e+001	0	0	0	0	0	0	13835.8	1	1	46.8651	46.4667
DATA	1797	22	12	0	0	A_44_P269808	NM_001025281	7021.5	335.352	1.734014e+002	2.256903e+001	257	46	1.614604e+001	0	0	0	0	0	0	148.889	1	1	65	49.1379
DATA	1798	22	13	0	0	A_64_P108165	NM_001108889	7047	335.455	5.325756e+001	1.531235e+001	158	47	1.114621e+001	0	0	0	0	0	0	46.0139	1	0	55.8519	45.3571
DATA	1799	22	14	0	0	A_42_P581567	NM_001011899	7072.18	335.045	1.486281e+003	1.493116e+002	1392	41	9.089793e+000	0	0	0	0	0	0	1291.83	1	1	45.835	41.4286
DATA	1800	22	15	0	0	A_42_P746029	NM_144748	7097.58	335.427	4.639592e+001	1.492423e+001	149	43	1.101181e+001	0	0	0	0	0	0	40.5705	1	0	57.5363	41.52
DATA	1801	22	16	0	0	A_42_P481087	XM_232226	7123.13	335.229	8.220170e+003	8.221380e+002	7126.5	45	1.066899e+001	0	0	0	1	0	0	7230.63	1	1	46.5243	46.4103
DATA	1802	22	17	0	0	A_64_P031020	ENSRNOT00000032728	7148.21	335.444	1.407510e+001	1.403349e+001	115	44	9.509479e+000	0	0	0	0	0	0	5.37768	0	0	47.5395	43.2593
DATA	1803	22	18	0	0	A_44_P344228	NM_183051	7173.67	335.5	4.934304e+001	1.478796e+001	152.5	43	1.029359e+001	0	0	0	0	0	0	43.9036	1	0	57.5363	43.5714
DATA	1804	22	19	0	0	A_64_P009798	NM_021742	7199.42	335.427	1.391609e+001	1.386243e+001	110	44	1.437576e+001	0	0	0	0	0	0	1.05731	0	0	57.5363	45.3448
DATA	1805	22	20	0	0	A_44_P775747	ENSRNOT00000051510	7224.49	335.536	3.519484e+004	3.519511e+003	31989.5	45	1.232910e+001	0	0	0	0	0	0	31663.3	1	1	52.0157	45.56
DATA	1806	22	21	0	0	A_44_P349475	NM_031333	7249.94	335.3	4.039829e+003	4.042156e+002	3738	42.5	9.075790e+000	0	0	0	0	0	0	3653.9	1	1	46.8651	43.7813
DATA	1807	22	22	0	0	A_64_P114198	NM_001080153	7275.49	335.13	2.818026e+003	2.821326e+002	2644.5	41.5	6.523331e+000	0	0	0	0	0	0	2562.2	1	1	47.2035	42.9231
DATA	1808	22	23	0	0	A_42_P719060	NM_001108994	7301	335.271	5.611672e+003	5.613313e+002	5038	43	1.020417e+001	0	0	0	0	0	0	5128.52	1	1	46.8651	43.5625
DATA	1809	22	24	0	0	A_44_P163243	NM_175759	7326.33	335.5	1.355757e+001	1.350480e+001	98.5	44	1.068354e+001	0	0	0	0	0	0	-8.12086	0	0	65	45.069
DATA	1810	22	25	0	0	A_44_P156864	A_44_P156864	7351.5	335.5	1.462210e+002	1.986066e+001	239	39.5	7.014271e+000	0	0	0	0	0	0	134.944	1	1	57.5363	40
DATA	1811	22	26	0	0	A_42_P758052	NM_001031645	7377.32	335.746	5.308873e+003	5.310558e+002	4814	39	1.057783e+001	0	0	0	1	0	0	4923.04	1	1	47.5395	40.7619
DATA	1812	22	27	0	0	A_44_P280659	NM_001100971	7402.53	335.667	4.810746e+002	4.991624e+001	553	40.5	1.112085e+001	0	0	0	0	0	0	448.131	1	1	49.1849	41.0625
DATA	1813	22	28	0	0	A_42_P768380	NM_001100158	7428.06	335.768	9.536994e+003	9.537915e+002	8733.5	41	8.913728e+000	0	0	0	1	0	0	8923.5	1	1	46.5243	42.7273
DATA	1814	22	29	0	0	A_44_P486312	NM_144737	7453.43	335.389	1.228249e+003	1.235322e+002	1261	43	9.720636e+000	0	0	0	0	0	0	1154.11	1	1	48.2044	44.2571
DATA	1815	22	30	0	0	A_64_P005288	XM_575125	7478.39	335.338	9.610665e+001	1.628536e+001	199	45	1.064153e+001	0	0	0	0	0	0	90.6719	1	1	47.8731	43.6296
DATA	1816	22	31	0	0	A_64_P101885	ENSRNOT00000058341	7504	335.545	7.159839e+002	7.278593e+001	762	37	8.495290e+000	0	0	0	0	0	0	678.219	1	1	55.8519	39.2069
DATA	1817	22	32	0	0	A_64_P113645	ENSRNOT00000055538	7529.42	335.573	1.487720e+001	1.312897e+001	120	44	1.135826e+001	0	0	0	0	0	0	14.1465	1	0	57.5363	43.52
DATA	1818	22	33	0	0	A_42_P588869	NM_001008348	7554.79	335.875	6.078256e+003	6.079645e+002	5726	41	9.548816e+000	0	0	0	0	0	0	5801.05	1	1	47.5395	42.0714
DATA	1819	22	34	0	0	A_64_P028027	NM_001000473	7580.42	335.573	8.207516e+001	1.533261e+001	186	44	1.013359e+001	0	0	0	0	0	0	78.6075	1	1	57.5363	44
DATA	1820	22	35	0	0	A_42_P468805	NM_145721	7605.31	335.681	1.548862e+003	1.554232e+002	1566	44	1.012184e+001	0	0	0	0	0	0	1488.31	1	1	48.2044	42.25
DATA	1821	22	36	0	0	A_42_P522194	NM_012914	7630.8	335.761	4.228779e+002	4.420204e+001	520.5	38	1.368371e+001	0	0	0	0	0	0	407.648	1	1	46.8651	42.6207
DATA	1822	22	37	0	0	A_64_P002969	A_64_P002969	7656.42	335.573	1.287829e+001	1.287867e+001	115	41	9.094604e+000	0	0	0	0	0	0	11.0164	0	0	57.5363	41.6129
DATA	1823	22	38	0	0	A_42_P453935	NM_001198580	7681.99	335.771	1.841495e+004	1.841539e+003	17435	49	1.067996e+001	0	0	0	0	0	0	17857.1	1	1	46.8651	47.3824
DATA	1824	22	39	0	0	A_42_P523551	NM_001014087	7707.09	335.614	1.280724e+001	1.275739e+001	102	46	9.143855e+000	0	0	0	0	0	0	-1.83793	0	0	65	46.0857
DATA	1825	22	40	0	0	A_64_P046076	NM_053952	7732.81	335.662	3.378672e+003	3.381067e+002	3354	44.5	1.145538e+001	0	0	0	0	0	0	3293.41	1	1	46.5243	43.5
DATA	1826	22	41	0	0	A_42_P607770	NM_001134616	7758.14	335.817	1.022060e+004	1.022138e+003	9802.5	40	6.594948e+000	0	0	0	0	0	0	9986.16	1	1	46.8651	40.08
DATA	1827	22	42	0	0	A_64_P089400	NM_022605	7783.35	335.88	5.145667e+002	5.299294e+001	595	42	9.164788e+000	0	0	0	0	0	0	503.856	1	1	48.8603	41.92
DATA	1828	22	43	0	0	A_64_P072064	FQ221714	7808.5	336	1.148803e+005	1.148804e+004	113596	44.5	1.863013e+001	0	0	0	0	0	0	112714	1	1	54.1152	49.2333
DATA	1829	22	44	0	0	A_42_P555125	NM_012913	7834	335.839	3.039554e+004	3.039580e+003	29451	46	1.307626e+001	0	0	0	0	0	0	29877.4	1	1	51.4001	49.6667
DATA	1830	22	45	0	0	A_42_P768776	NM_001108443	7859.71	335.754	1.531392e+004	1.531444e+003	14820.5	44	7.618368e+000	0	0	0	0	0	0	15078.2	1	1	45.1352	44.3043
DATA	1831	22	46	0	0	A_42_P593930	NM_001195606	7884.76	335.896	1.262802e+001	1.258057e+001	104.5	38	6.759922e+000	0	0	0	0	0	0	2.03598	0	0	45.835	39.6
DATA	1832	22	47	0	0	A_64_P013545	NM_001115046	7910.35	335.923	1.451092e+003	1.456519e+002	1535.5	41	1.114047e+001	0	0	0	0	0	0	1432.8	1	1	45.1352	40.88
DATA	1833	22	48	0	0	A_42_P548520	NM_001100834	7935.62	335.911	1.196529e+004	1.196595e+003	11869.5	44	7.789309e+000	0	0	0	0	0	0	11828	1	1	49.5074	44.56
DATA	1834	22	49	0	0	A_42_P692317	NM_001107565	7961.15	336	1.955479e+003	1.959492e+002	1965	46	1.080931e+001	0	0	0	0	0	0	1934.97	1	1	46.8651	47.7857
DATA	1835	22	50	0	0	A_64_P078303	NM_001106526	7986.46	335.853	7.064590e+001	1.438013e+001	176	41	1.074516e+001	0	0	0	0	0	0	69.9609	1	1	46.8651	43.4615
DATA	1836	22	51	0	0	A_64_P031771	A_64_P031771	8011.64	336.116	1.697350e+002	2.108970e+001	275	45	8.527482e+000	0	0	0	0	0	0	168.199	1	1	46.5243	42.7778
DATA	1837	22	52	0	0	A_44_P393929	NM_001039713	8037.4	336.151	4.291155e+002	4.469817e+001	531	40.5	1.019645e+001	0	0	0	0	0	0	425.435	1	1	48.5334	42.5909
DATA	1838	22	53	0	0	A_44_P135730	XM_228802	8062.5	335.727	6.384169e+002	6.505538e+001	737	42	1.047616e+001	0	0	0	0	0	0	633.113	1	1	46.5243	44.4
DATA	1839	22	54	0	0	A_43_P23215	NM_001025737	8087.91	336.386	2.892774e+002	3.151510e+001	388.5	38.5	1.090945e+001	0	0	0	0	0	0	286.923	1	1	57.259	39.8667
DATA	1840	22	55	0	0	A_64_P118427	A_64_P118427	8113.23	336.198	8.427619e+002	8.519905e+001	936	38	9.142145e+000	0	0	0	0	0	0	835.864	1	1	50.4627	38.6897
DATA	1841	22	56	0	0	A_64_P075560	NM_001037526	8138.19	336	3.600136e+001	1.301645e+001	140	46	1.009433e+001	0	0	0	0	0	0	35.6993	1	0	46.8651	46.9667
DATA	1842	22	57	0	0	A_64_P150311	NM_177935	8164.38	336.237	7.239304e+001	1.445644e+001	175	41	9.096770e+000	0	0	0	0	0	0	71.7594	1	1	49.1849	41.4138
DATA	1843	22	58	0	0	A_44_P272393	NM_001106892	8189.58	336.427	2.087998e+002	2.434578e+001	308	39	7.466052e+000	0	0	0	0	0	0	206.865	1	1	57.5363	39.5
DATA	1844	22	59	0	0	A_44_P421887	NM_001191565	8215.06	336.232	9.451265e+002	9.533942e+001	1031	40.5	7.817493e+000	0	0	0	0	0	0	935.707	1	1	46.5243	40.9118
DATA	1845	22	60	0	0	A_64_P045102	A_64_P045102	8240.37	336.356	7.157342e+002	7.266350e+001	840.5	40	8.409058e+000	0	0	0	0	0	0	708.003	1	1	42.5954	39.5926
DATA	1846	22	61	0	0	A_42_P818546	NM_001191600	8265.8	336.033	3.015594e+003	3.018205e+002	3091	43.5	8.790554e+000	0	0	0	0	0	0	2979.94	1	1	44.7812	43.0769
DATA	1847	22	62	0	0	A_42_P777445	ENSRNOT00000012684	8290.97	335.985	1.065531e+002	1.647597e+001	207	43	1.614970e+001	0	0	0	0	0	0	105.171	1	1	46.8651	48.7097
DATA	1848	22	63	0	0	A_64_P111709	NM_001000554	8316.31	336.384	2.892780e+002	3.154598e+001	392.5	40	9.126589e+000	0	0	0	0	0	0	285.157	1	1	48.5334	39.8065
DATA	1849	22	64	0	0	A_64_P107509	NM_001191874	8341.67	336.5	2.223810e+002	2.556029e+001	321	40	8.406880e+000	0	0	0	0	0	0	218.892	1	1	65	39.9714
DATA	1850	22	65	0	0	A_64_P121836	ENSRNOT00000007828	8367.28	336.338	2.445844e+002	2.752334e+001	344	37	1.029811e+001	0	0	0	0	0	0	240.351	1	1	47.8731	39.3636
DATA	1851	22	66	0	0	A_42_P684281	XR_008784	8392.86	336.39	5.316173e+003	5.317677e+002	5166	42	6.979416e+000	0	0	0	0	0	0	5214.88	1	1	49.8279	41.5926
DATA	1852	22	67	0	0	A_64_P060804	ENSRNOT00000000462	8418.11	336.5	1.263054e+002	1.788923e+001	224	41	9.344310e+000	0	0	0	0	0	0	123.664	1	1	56.9804	43.129
DATA	1853	22	68	0	0	A_64_P075675	A_64_P075675	8443.5	336.5	4.019920e+002	4.215602e+001	495	38.5	8.772334e+000	0	0	0	0	0	0	392.779	1	1	57.5363	39.9231
DATA	1854	22	69	0	0	A_44_P254973	NM_198051	8469.1	336.095	2.826233e+002	3.099411e+001	377.5	37	7.085156e+000	0	0	0	0	0	0	275.53	1	1	45.4864	37.7407
DATA	1855	22	70	0	0	A_42_P492976	NM_001126099	8494.43	336.392	1.768942e+003	1.773533e+002	1778.5	36	9.190458e+000	0	0	0	0	0	0	1720.58	1	1	49.1849	38.7419
DATA	1856	22	71	0	0	A_42_P619114	NM_001014204	8519.43	336.194	8.777143e+001	1.550655e+001	192	46	1.270328e+001	0	0	0	0	0	0	85.1646	1	1	47.8731	44.04
DATA	1857	22	72	0	0	A_42_P541625	NM_001126090	8545.07	336.409	4.383202e+004	4.383221e+003	42412.5	44	1.109676e+001	0	0	0	0	0	0	42420.2	1	1	52.3208	45.2059
DATA	1858	22	73	0	0	A_42_P469136	NM_001044288	8570.67	336.458	2.374454e+003	2.377930e+002	2370	44.5	1.002451e+001	0	0	0	0	0	0	2291.72	1	1	48.2044	44.25
DATA	1859	22	74	0	0	A_64_P101480	ENSRNOT00000034261	8595.58	336.573	1.365151e+002	1.877337e+001	234.5	40	6.969674e+000	0	0	0	0	0	0	131.395	1	1	57.5363	38.8276
DATA	1860	22	75	0	0	A_64_P078554	ENSRNOT00000020079	8621.26	336.58	5.508168e+002	5.657788e+001	634	42	1.192152e+001	0	0	0	0	0	0	528.586	1	1	46.8651	41.5484
DATA	1861	22	76	0	0	A_44_P131067	ENSRNOT00000045483	8646.5	336.5	2.085927e+001	1.313143e+001	126	38	8.451416e+000	0	0	0	0	0	0	19.9567	1	0	46.5243	38.7667
DATA	1862	22	77	0	0	A_64_P055699	ENSRNOT00000010871	8672.19	336.329	2.965839e+003	2.968690e+002	2915	41	1.342604e+001	0	0	0	0	0	0	2828.42	1	1	48.2044	44.4828
DATA	1863	22	78	0	0	A_64_P117203	NM_001106002	8697.64	336.573	2.479874e+004	2.479908e+003	23902.5	41	8.690578e+000	0	0	0	0	0	0	23573.1	1	1	52.9257	41.6154
DATA	1864	22	79	0	0	A_44_P357870	NM_031559	8723.27	336.873	2.104448e+003	2.108516e+002	2024	40	9.422234e+000	0	0	0	0	0	0	1993.72	1	1	41.8414	41.6129
DATA	1865	22	80	0	0	A_42_P732101	NM_022624	8748.44	336.603	1.325918e+004	1.325983e+003	12256.5	38.5	1.046410e+001	0	0	0	0	0	0	12518.4	1	1	50.1463	40.6429
DATA	1866	22	81	0	0	A_64_P155054	XM_001062835	8773.62	336.519	1.504161e+002	2.000168e+001	254	42	6.011483e+000	0	0	0	0	0	0	141.514	1	1	51.4001	40.931
DATA	1867	22	82	0	0	A_44_P534154	NM_001108852	8798.91	336.614	5.408339e+002	5.567840e+001	613.5	40	7.045841e+000	0	0	0	0	0	0	507	1	1	57.259	39.5185
DATA	1868	22	83	66	1	DarkCorner	DarkCorner	8824.37	336.8	1.333222e+001	1.328033e+001	84	36	9.480905e+000	0	0	0	0	0	0	-27.9696	0	0	47.2035	35.9643
DATA	1869	22	84	66	1	DarkCorner	DarkCorner	8849.62	336.823	1.338221e+001	1.333012e+001	85	43	8.339341e+000	0	0	0	0	0	0	-28.0888	0	0	50.1463	40.7692
DATA	1870	22	85	66	1	DarkCorner	DarkCorner	8875.32	336.784	1.343428e+001	1.338199e+001	91	36	9.317243e+000	0	0	0	0	0	0	-22.3803	0	0	48.2044	36.6393
DATA	1871	23	1	66	1	DarkCorner	DarkCorner	6729.09	342.333	1.561866e+001	1.555787e+001	92	35	9.119285e+000	0	0	0	0	0	0	-20.108	0	0	50.1463	36.2778
DATA	1872	23	2	66	1	DarkCorner	DarkCorner	6754.86	342.726	1.551122e+001	1.545085e+001	87	36	9.790085e+000	0	0	0	0	0	0	-22.0735	0	0	48.2044	37.3438
DATA	1873	23	3	66	1	DarkCorner	DarkCorner	6780.42	342.427	1.540769e+001	1.534773e+001	89.5	44	1.355993e+001	0	0	0	0	0	0	-21.3398	0	0	57.5363	43.7778
DATA	1874	23	4	0	0	A_44_P246268	NM_001106862	6805.56	342.725	3.265017e+001	1.559135e+001	132	46.5	1.142715e+001	0	0	0	0	0	0	26.5639	1	0	46.8651	45.8333
DATA	1875	23	5	0	0	A_64_P028396	ENSRNOT00000051835	6831.11	342.5	5.594007e+001	1.614467e+001	155	46.5	1.005930e+001	0	0	0	0	0	0	45.8161	1	0	56.9804	45.6875
DATA	1876	23	6	0	0	A_64_P020451	XM_219275	6856.24	342.412	4.906360e+001	1.582570e+001	152	47.5	1.204016e+001	0	0	0	0	0	0	40.4475	1	0	46.8651	46
DATA	1878	23	8	0	0	A_64_P106264	ENSRNOT00000029671	6906.94	342.382	2.650854e+003	2.655011e+002	2344	51	1.339774e+001	0	0	0	0	0	0	2214.09	1	1	46.1809	49.641
DATA	1879	23	9	0	0	A_44_P524805	NM_214832	6932.41	342.808	4.043187e+001	1.529752e+001	139.5	44	1.825030e+001	0	0	0	0	0	0	33.9922	1	0	50.1463	47.36
DATA	1880	23	10	0	0	A_42_P764228	NM_031707	6957.8	342.425	8.067439e+003	8.068771e+002	6928	41.5	7.824692e+000	0	0	0	0	0	0	6825.69	1	1	50.4627	42
DATA	1881	23	11	0	0	A_44_P533760	NM_182843	6983.38	342.57	6.990803e+003	6.992321e+002	5906	43	9.607992e+000	0	0	0	0	0	0	5952.79	1	1	50.4627	42.5938
DATA	1882	23	12	0	0	A_42_P524610	NM_001108992	7008.82	342.639	4.150237e+003	4.152761e+002	3544	42	9.509135e+000	0	0	0	1	0	0	3556.28	1	1	47.8731	43.931
DATA	1883	23	13	0	0	A_42_P570756	NM_134345	7034.33	342.5	1.281017e+005	1.281018e+004	111809	45	1.105140e+001	0	0	0	0	0	0	110451	1	1	57.5363	44.7333
DATA	1884	23	14	0	0	A_44_P362969	NM_053688	7059.39	342.638	5.284335e+003	5.286269e+002	4674	46	1.016754e+001	0	0	0	0	0	0	4583.83	1	1	47.5395	43.9545
DATA	1885	23	15	0	0	A_44_P308197	NM_001012190	7084.8	342.625	8.186350e+003	8.187584e+002	7130	37	7.772631e+000	0	0	0	0	0	0	7144	1	1	50.4627	38
DATA	1886	23	16	0	1	ETG05_36762	ETG05_36762	7110.15	342.704	8.878292e+001	1.668738e+001	185	45	1.120606e+001	0	0	0	0	0	0	77.9386	1	1	47.5395	46
DATA	1887	23	17	0	0	A_42_P744033	NM_001100846	7135.88	342.603	1.432332e+003	1.439203e+002	1350	44.5	1.066177e+001	0	0	0	0	0	0	1264.8	1	1	48.5334	44.9375
DATA	1888	23	18	0	0	A_42_P726363	NM_031536	7161.03	342.686	4.059598e+001	1.454517e+001	142	44	9.034700e+000	0	0	0	0	0	0	36.0518	1	0	46.5243	43.3226
DATA	1889	23	19	0	0	A_64_P010393	NM_053363	7186.63	342.64	7.415645e+003	7.416945e+002	6605	41.5	1.452519e+001	0	0	0	0	0	0	6622.88	1	1	48.8603	43.5588
DATA	1890	23	20	0	0	A_42_P612220	NM_001191711	7212	342.545	3.210546e+003	3.213516e+002	2876	41.5	1.500226e+001	0	0	0	0	0	0	2883.09	1	1	55.8519	44.0333
DATA	1891	23	21	0	0	A_44_P393551	NM_012567	7237.16	342.516	6.254467e+004	6.254482e+003	55774	42	1.118065e+001	0	0	0	1	0	0	56465.9	1	1	53.2255	43.6
DATA	1892	23	22	0	0	A_44_P278688	NM_053682	7262.68	342.573	4.933103e+003	4.934995e+002	4518	40.5	5.740619e+000	0	0	0	0	0	0	4477.3	1	1	51.0895	42.2083
DATA	1893	23	23	0	0	A_44_P186989	NM_001000076	7288.37	342.596	2.194431e+001	1.377149e+001	129	44	8.142318e+000	0	0	0	0	0	0	20.0206	1	0	57.8122	44.8788
DATA	1894	23	24	0	0	A_42_P640277	NM_001003401	7313.63	342.64	4.847537e+004	4.847556e+003	44095	45	1.006371e+001	0	0	0	0	0	0	44447.2	1	1	48.8603	46.7241
DATA	1895	23	25	0	0	A_44_P398792	NM_053867	7338.78	343.169	2.244073e+004	2.244113e+003	20810	44	9.300538e+000	0	0	0	0	0	0	20676.9	1	1	45.835	43
DATA	1896	23	26	0	0	A_64_P052552	ENSRNOT00000056797	7364.5	342.648	1.656016e+002	2.130129e+001	262	41	9.709923e+000	0	0	0	0	0	0	153.312	1	1	57.5363	43.25
DATA	1897	23	27	0	0	A_64_P119254	NM_001013202	7389.5	343	1.338896e+001	1.333685e+001	105	40.5	1.221914e+001	0	0	0	0	0	0	-1.86789	0	0	54.1152	41.4545
DATA	1898	23	28	0	0	A_64_P159614	NM_053614	7415.31	343.014	5.684330e+003	5.685880e+002	5355	42.5	8.443300e+000	0	0	0	0	0	0	5310.69	1	1	47.2035	43.5313
DATA	1899	23	29	0	0	A_42_P814107	NM_001024750	7440.65	342.88	4.434268e+002	4.627122e+001	521	42	9.608470e+000	0	0	0	0	0	0	416.066	1	1	48.8603	44.1714
DATA	1900	23	30	0	0	A_64_P150751	NM_212494	7465.91	342.896	1.061900e+003	1.070030e+002	1082	45.5	7.946568e+000	0	0	0	0	0	0	1000.53	1	1	46.8651	45.0588
DATA	1902	23	32	0	0	A_44_P838888	ENSRNOT00000038829	7516.72	342.905	3.210973e+002	3.466439e+001	417	44.5	8.702823e+000	0	0	0	0	0	0	304.942	1	1	48.8603	43.5
DATA	1903	23	33	0	0	A_43_P12927	NM_053769	7542.24	343	1.361007e+003	1.367213e+002	1394	44	8.820040e+000	0	0	0	0	0	0	1297.39	1	1	46.8651	42.6897
DATA	1904	23	34	0	0	A_64_P140806	A_64_P140806	7567.38	343.042	3.067063e+004	3.067090e+003	29442	45	1.143120e+001	0	0	0	0	0	0	29340.5	1	1	48.2044	43.8788
DATA	1905	23	35	0	0	A_42_P607026	NM_001106839	7592.68	343.273	1.093826e+004	1.093902e+003	10127	46	5.350557e+000	0	0	0	0	0	0	10499.7	1	1	49.8279	44.913
DATA	1906	23	36	0	0	A_44_P272186	NM_001107950	7618.42	343.427	5.389956e+001	1.396156e+001	159	42	1.177089e+001	0	0	0	0	0	0	51.9097	1	0	57.5363	43.0769
DATA	1907	23	37	0	0	A_44_P226658	NM_017046	7643.5	343.352	1.243154e+002	1.787206e+001	227.5	37	1.038745e+001	0	0	0	0	0	0	120.091	1	1	57.5363	39.4483
DATA	1908	23	38	0	0	A_64_P119279	NM_001108109	7669.16	342.635	1.463637e+004	1.463693e+003	14160	45	1.111621e+001	0	0	0	0	0	0	14180	1	1	44.7812	45.1515
DATA	1909	23	39	0	0	A_44_P1042876	NM_212504	7694.63	343	4.376258e+003	4.378120e+002	4135	49.5	9.399193e+000	0	0	0	0	0	0	4251.67	1	1	48.5334	48
DATA	1910	23	40	0	0	A_64_P119607	ENSRNOT00000037601	7719.85	342.866	4.588059e+002	4.761507e+001	545.5	42	7.828519e+000	0	0	0	0	0	0	446.889	1	1	46.1809	41.8333
DATA	1911	23	41	0	0	A_42_P784252	NM_133557	7745.49	342.929	2.761538e+004	2.761567e+003	26694	40	1.192679e+001	0	0	0	0	0	0	26964.1	1	1	47.8731	40.6
DATA	1912	23	42	0	0	A_44_P1033194	NM_139328	7770.71	342.833	3.995003e+003	3.997013e+002	3936.5	40	8.519508e+000	0	0	0	0	0	0	3909.51	1	1	45.835	40.7143
DATA	1913	23	43	0	0	A_42_P800048	NM_207610	7796.11	343.211	1.046064e+004	1.046140e+003	10121	44	7.278544e+000	0	0	0	0	0	0	10258.4	1	1	46.8651	44.8519
DATA	1914	23	44	0	0	A_43_P11525	NM_012710	7821.42	343.427	7.030595e+001	1.444965e+001	175	49	1.757377e+001	0	0	0	0	0	0	69.0796	1	1	57.5363	53.1379
DATA	1915	23	45	0	0	A_64_P019037	NM_001013886	7847	342.774	2.845939e+004	2.845967e+003	27698	45.5	1.290954e+001	0	0	0	0	0	0	28011	1	1	45.4864	46.5278
DATA	1916	23	46	0	0	A_64_P003378	NM_001024336	7872.25	343.077	3.751863e+002	3.957223e+001	484	38.5	8.074367e+000	0	0	0	0	0	0	369.861	1	1	45.835	40.3333
DATA	1917	23	47	0	0	A_44_P258855	NM_053431	7897.57	342.761	1.313327e+004	1.313387e+003	12925.5	38	1.005822e+001	0	0	0	0	0	0	12964.8	1	1	46.5243	41.2667
DATA	1918	23	48	0	1	ETG09_35454	ETG09_35454	7922.89	343.5	1.640840e+001	1.265573e+001	121	42	1.145536e+001	0	0	0	0	0	0	16.2185	1	0	56.9804	42.9565
DATA	1919	23	49	0	0	A_64_P089677	NM_001105977	7948.42	343.427	2.202846e+002	2.534548e+001	325	48.5	1.126137e+001	0	0	0	0	0	0	217.967	1	1	57.5363	47.5385
DATA	1920	23	50	0	0	A_64_P013609	A_64_P013609	7973.58	343.427	4.613300e+001	1.334713e+001	150	45	1.048920e+001	0	0	0	0	0	0	45.6881	1	0	57.5363	47.24
DATA	1921	23	51	0	0	A_44_P357470	NM_030849	7999.21	343.301	2.198445e+003	2.202005e+002	2251	41	6.968087e+000	0	0	0	0	0	0	2178.81	1	1	48.2044	40.9643
DATA	1922	23	52	0	0	A_44_P404064	ENSRNOT00000015387	8024.63	343.37	3.479498e+003	3.481746e+002	3582.5	45	9.435340e+000	0	0	0	0	0	0	3450.34	1	1	48.2044	42.7778
DATA	1923	23	53	0	0	A_64_P092167	A_64_P092167	8049.72	343.014	6.606910e+001	1.414225e+001	169	45.5	1.006923e+001	0	0	0	0	0	0	65.5388	1	1	49.1849	46.5417
DATA	1924	23	54	0	0	A_42_P463036	ENSRNOT00000038596	8075.46	343.386	9.251915e+003	9.252759e+002	8976	41.5	9.217249e+000	0	0	0	1	0	0	9179.83	1	1	47.5395	40.0714
DATA	1925	23	55	0	0	A_44_P1003794	NM_012576	8100.71	343.262	2.187610e+003	2.191179e+002	2231	40	9.739716e+000	0	0	0	0	0	0	2170.65	1	1	45.1352	39.1724
DATA	1926	23	56	0	0	A_64_P099006	BC105831	8126.05	343.082	1.926799e+001	1.264986e+001	121.5	45	9.555722e+000	0	0	0	0	0	0	19.1161	1	0	46.8651	47.3871
DATA	1927	23	57	0	0	A_42_P795467	NM_001108055	8151.63	343.444	2.360999e+002	2.671744e+001	337	42.5	8.043345e+000	0	0	0	0	0	0	234.176	1	1	48.2044	43.8333
DATA	1928	23	58	0	0	A_42_P629321	NM_031590	8177.06	343.538	1.208330e+003	1.214790e+002	1294	37	7.418241e+000	0	0	0	0	0	0	1197.95	1	1	44.7812	37.0303
DATA	1929	23	59	0	0	A_42_P549786	NM_022609	8202.44	343.521	4.998362e+003	4.999929e+002	4893.5	43	6.319762e+000	0	0	0	0	0	0	4952.39	1	1	48.2044	43
DATA	1930	23	60	0	0	A_64_P006354	ENSRNOT00000043959	8227.59	343.4	1.924999e+002	2.296793e+001	290	39	8.534996e+000	0	0	0	0	0	0	190.582	1	1	49.5074	39.3333
DATA	1931	23	61	0	0	A_64_P057109	A_64_P057109	8253.07	343.378	2.398058e+003	2.401335e+002	2452	41.5	9.820223e+000	0	0	0	0	0	0	2371.95	1	1	50.7771	41.6667
DATA	1932	23	62	0	0	A_44_P101361	NM_032070	8278.42	343.573	1.454377e+001	1.263767e+001	122	45	9.480143e+000	0	0	0	0	0	0	14.37	1	0	57.5363	45.8387
DATA	1933	23	63	0	0	A_64_P103354	ENSRNOT00000066893	8303.83	343.681	2.430879e+003	2.434127e+002	2497	45	1.522056e+001	0	0	0	0	0	0	2398.87	1	1	46.8651	48.7
DATA	1934	23	64	0	0	A_42_P746868	NM_001127580	8329.31	343.662	4.247990e+004	4.248009e+003	41429.5	43	7.450986e+000	0	0	0	0	0	0	41861.9	1	1	48.5334	42.9643
DATA	1935	23	65	0	0	A_42_P707838	NM_012979	8354.88	343.397	9.023777e+003	9.024657e+002	8568	43	1.020930e+001	0	0	0	0	0	0	8878.56	1	1	48.5334	42.2162
DATA	1936	23	66	0	0	A_42_P628098	NM_001107991	8380	343.5	3.418473e+003	3.420805e+002	3431	40.5	8.870989e+000	0	0	0	0	0	0	3357.86	1	1	52.3208	41.3611
DATA	1937	23	67	0	0	A_64_P028071	ENSRNOT00000042928	8405.42	343.573	2.877888e+005	2.877888e+004	282585	44.5	9.097506e+000	0	0	0	0	0	0	282169	1	1	57.5363	45.2692
DATA	1938	23	68	0	0	A_64_P002944	A_64_P002944	8430.75	343.627	1.566400e+004	1.566451e+003	15401	38	7.103136e+000	0	0	0	0	0	0	15328	1	1	46.1809	40
DATA	1939	23	69	0	0	A_64_P072159	XM_574060	8456.15	343.581	3.456960e+001	1.316447e+001	141	37	8.306515e+000	0	0	0	0	0	0	33.7565	1	0	44.0646	37.9583
DATA	1940	23	70	0	0	A_64_P052365	NM_001109318	8481.5	343.5	2.964080e+002	3.225922e+001	405	36.5	6.880313e+000	0	0	0	0	0	0	288.786	1	1	46.5243	38.375
DATA	1941	23	71	0	0	A_64_P023150	ENSRNOT00000042777	8506.91	343.935	1.922297e+002	2.307306e+001	290	43	8.679478e+000	0	0	0	0	0	0	186.847	1	1	54.4085	43.1111
DATA	1942	23	72	0	0	A_44_P374902	NM_133429	8532.27	343.781	5.954782e+002	6.090654e+001	679	44	1.066350e+001	0	0	0	0	0	0	577.352	1	1	48.2044	42.1667
DATA	1943	23	73	0	0	A_44_P163271	NM_198733	8557.5	344	1.287650e+001	1.285506e+001	117	42	1.083353e+001	0	0	0	0	0	0	8.29997	0	0	54.1152	43.2941
DATA	1944	23	74	0	0	A_42_P548520	NM_001100834	8583.12	344	1.201717e+004	1.201785e+003	11640	41	6.998306e+000	0	0	0	0	0	0	11589	1	1	49.8279	39.3913
DATA	1945	23	75	0	0	A_64_P012154	XM_225935	8608.5	344	2.665061e+001	1.317133e+001	134	41	8.664851e+000	0	0	0	0	0	0	25.6275	1	0	54.1152	40.7813
DATA	1946	23	76	0	0	A_64_P033574	NM_001000606	8634.01	343.694	1.298841e+001	1.293786e+001	108	38	7.433466e+000	0	0	0	0	0	0	-1.11263	0	0	47.5395	39.4444
DATA	1947	23	77	0	0	A_64_P027764	NM_022685	8659.48	343.821	1.774158e+002	2.198154e+001	274	38.5	1.043498e+001	0	0	0	0	0	0	169.567	1	1	46.5243	39
DATA	1948	23	78	0	0	A_42_P484738	NM_022266	8684.78	343.75	6.088424e+003	6.089816e+002	5923.5	41	8.348192e+000	0	0	0	0	0	0	5800.58	1	1	45.1352	41.6667
DATA	1949	23	79	0	0	A_64_P036355	NM_053311	8710.16	343.952	2.846410e+004	2.846440e+003	26845.5	40	8.799804e+000	0	0	0	0	0	0	27029.9	1	1	50.7771	41.6452
DATA	1950	23	80	0	0	A_42_P694928	NM_001109046	8735.73	343.959	2.385733e+002	2.722040e+001	339	40	1.134664e+001	0	0	0	0	0	0	225.782	1	1	48.2044	42.7097
DATA	1951	23	81	0	0	A_42_P588738	NM_133542	8760.89	343.886	2.322479e+002	2.669002e+001	323	40	7.566337e+000	0	0	0	0	0	0	219.04	1	1	46.8651	41.129
DATA	1952	23	82	0	0	A_64_P141254	XM_001060542	8786.42	344.427	1.156141e+002	1.754582e+001	216.5	43	9.203507e+000	0	0	0	0	0	0	108.655	1	1	57.5363	45.2727
DATA	1953	23	83	0	0	A_42_P546054	NM_001013873	8811.6	344.156	6.915091e+002	7.040815e+001	771	39.5	8.400824e+000	0	0	0	0	0	0	647.534	1	1	49.8279	37.4231
DATA	1954	23	84	66	1	DarkCorner	DarkCorner	8836.84	343.688	1.334754e+001	1.329559e+001	91	43	8.695313e+000	0	0	0	0	0	0	-24.1561	0	0	45.4864	42.8571
DATA	1955	23	85	66	1	DarkCorner	DarkCorner	8862.53	343.691	1.339862e+001	1.334647e+001	88.5	39	9.830088e+000	0	0	0	0	0	0	-25.6879	0	0	46.5243	40.3784
DATA	1956	24	1	66	1	DarkCorner	DarkCorner	6742	349.551	1.554417e+001	1.548367e+001	93	36	7.571293e+000	0	0	0	0	0	0	-18.7921	0	0	47.2035	37.093
DATA	1957	24	2	66	1	DarkCorner	DarkCorner	6767.58	349.573	1.543970e+001	1.537961e+001	90	40.5	1.347597e+001	0	0	0	0	0	0	-20.9516	0	0	57.5363	42.75
DATA	1958	24	3	0	0	A_64_P000371	NM_017308	6792.69	350.029	1.664647e+003	1.671642e+002	1462	46	1.089001e+001	0	0	0	0	0	0	1351.54	1	1	46.1809	43.375
DATA	1959	24	4	0	0	A_42_P772356	NM_001191597	6818.28	350.029	1.824407e+004	1.824470e+003	14799.5	44	8.573304e+000	0	0	0	0	0	0	14911.9	1	1	46.1809	43.6923
DATA	1961	24	6	0	0	A_42_P470757	NM_001004075	6869.21	349.74	1.014595e+004	1.014705e+003	8417.5	51	1.297510e+001	0	0	0	0	0	0	8402.71	1	1	48.5334	49.2593
DATA	1962	24	7	0	0	A_64_P034250	ENSRNOT00000041464	6893.97	350.134	8.185231e+001	1.698368e+001	177.5	44	1.222199e+001	0	0	0	0	0	0	68.2256	1	1	46.8651	45.6765
DATA	1963	24	8	0	0	A_64_P065063	NM_012954	6919.91	349.614	1.691724e+002	2.246708e+001	252.5	44	1.309102e+001	0	0	0	0	0	0	141.932	1	1	65	46.2667
DATA	1964	24	9	0	0	A_64_P088866	ENSRNOT00000049194	6945.5	349.648	4.690863e+002	4.915475e+001	518.5	43.5	1.328226e+001	0	0	0	0	0	0	396.104	1	1	57.5363	46.4615
DATA	1965	24	10	0	0	A_44_P111759	NM_001000956	6970.58	349.573	1.465453e+001	1.466128e+001	119	41	9.326341e+000	0	0	0	0	0	0	11.6088	0	0	57.5363	41.7742
DATA	1966	24	11	0	0	A_64_P045019	ENSRNOT00000032417	6995.77	350.359	2.021212e+003	2.026410e+002	1857.5	43.5	8.395407e+000	0	0	0	0	0	0	1728.38	1	1	44.7812	44.0313
DATA	1967	24	12	0	0	A_64_P138989	XM_001053562	7021.3	350.071	2.767742e+002	3.120660e+001	348.5	41.5	9.634759e+000	0	0	0	0	0	0	238.145	1	1	47.2035	43.5
DATA	1968	24	13	0	0	A_42_P537715	NM_001025743	7047.03	349.956	6.546168e+003	6.547735e+002	5620	49	1.247490e+001	0	0	0	0	0	0	5667.46	1	1	46.8651	48.1379
DATA	1969	24	14	0	0	A_42_P453171	NM_001107063	7072.27	349.7	4.706328e+003	4.708482e+002	4164	41	8.671528e+000	0	0	0	0	0	0	4098.95	1	1	46.8651	40.3333
DATA	1971	24	16	0	0	A_64_P096157	ENSRNOT00000059486	7123	350	7.568200e+002	7.697956e+001	769	42.5	9.497201e+000	0	0	0	0	0	0	666.984	1	1	54.9904	43.5556
DATA	1972	24	17	0	0	A_43_P10076	NM_031665	7148.35	349.88	1.877500e+004	1.877553e+003	16127	44	9.875842e+000	0	0	0	0	0	0	16641.3	1	1	48.8603	45.375
DATA	1974	24	19	0	0	A_42_P772878	NM_001011936	7199.21	350.194	6.654774e+003	6.656212e+002	5828	39	1.713140e+001	0	0	0	0	0	0	5965.1	1	1	47.5395	42.1212
DATA	1976	24	21	0	0	A_44_P447394	NM_019193	7249.97	349.723	1.171585e+004	1.171665e+003	10337	42	8.560977e+000	0	0	0	0	0	0	10614.2	1	1	45.4864	42.9032
DATA	1977	24	22	0	0	A_42_P504250	NM_001134987	7275.49	349.652	3.291167e+003	3.293984e+002	3069	40	6.322997e+000	0	0	0	0	0	0	2997.24	1	1	45.835	42.8621
DATA	1978	24	23	0	0	A_42_P675802	NM_145777	7300.84	349.821	8.305072e+003	8.306177e+002	7357.5	43	1.006299e+001	0	0	0	0	0	0	7601.79	1	1	46.1809	44.1714
DATA	1979	24	24	0	0	A_64_P111843	XM_001074913	7326.3	350.1	2.912892e+003	2.916011e+002	2753.5	42	9.557921e+000	0	0	0	0	0	0	2679.51	1	1	47.2035	40.9231
DATA	1980	24	25	0	0	A_44_P118724	NM_019361	7351.6	350.147	2.404296e+004	2.404333e+003	21898	41	9.940154e+000	0	0	0	0	0	0	22222.6	1	1	48.8603	42.84
DATA	1981	24	26	0	0	A_43_P21749	NM_001108329	7377	350.455	1.127107e+002	1.747698e+001	209	37.5	4.840259e+000	0	0	0	0	0	0	104.667	1	1	65	36.3889
DATA	1982	24	27	0	0	A_43_P11879	NM_017250	7402.18	350.478	1.184103e+002	1.780519e+001	216	41	1.144834e+001	0	0	0	0	0	0	110.454	1	1	46.5243	42.7576
DATA	1983	24	28	0	0	A_64_P023182	NM_001000033	7427.11	350.386	1.329196e+001	1.326378e+001	116	43	9.646105e+000	0	0	0	0	0	0	7.40183	0	0	47.2035	44.7879
DATA	1985	24	30	0	0	A_44_P368461	NM_001107085	7478.41	350.329	2.948004e+001	1.345633e+001	134.5	45.5	9.572770e+000	0	0	0	0	0	0	27.8505	1	0	47.8731	45.5
DATA	1986	24	31	0	0	A_64_P097257	A_64_P097257	7504	350.455	1.668473e+002	2.119897e+001	271	42.5	8.572611e+000	0	0	0	0	0	0	158.253	1	1	55.8519	42.6
DATA	1987	24	32	0	0	A_64_P100634	NM_001100171	7528.93	349.883	4.912842e+002	5.082684e+001	588	46	1.103956e+001	0	0	0	0	0	0	467.69	1	1	44.4243	44.5556
DATA	1988	24	33	0	0	A_64_P041902	NM_001025653	7554.63	350.514	6.719695e+003	6.720949e+002	6454	46	1.301515e+001	0	0	0	0	0	0	6420.87	1	1	48.2044	43.4138
DATA	1990	24	35	0	0	A_64_P116171	NM_001004266	7605.22	350.541	1.547661e+002	2.014366e+001	254.5	44	1.003137e+001	0	0	0	0	0	0	148.887	1	1	48.8603	43.5357
DATA	1991	24	36	0	0	A_44_P243279	NM_001134780	7630.69	350.483	9.390772e+002	9.478319e+001	1012	36	1.268312e+001	0	0	0	0	0	0	906.266	1	1	52.3208	41.6923
DATA	1992	24	37	0	0	A_64_P151468	XM_001062494	7656.42	350.427	5.165358e+001	1.381586e+001	155	46	1.268106e+001	0	0	0	0	0	0	49.9999	1	0	57.5363	46.4667
DATA	1993	24	38	0	0	A_64_P075769	ENSRNOT00000043984	7681.68	350.382	4.450562e+003	4.452396e+002	4574.5	49	9.785001e+000	0	0	0	0	0	0	4320.2	1	1	46.5243	47.7097
DATA	1994	24	39	0	0	A_42_P508921	NM_031703	7707.11	350.5	1.279365e+001	1.275586e+001	109	43	9.545477e+000	0	0	0	0	0	0	5.38461	0	0	65	44.871
DATA	1995	24	40	0	0	A_44_P503376	NM_001000274	7732.5	350.5	1.276176e+001	1.271464e+001	109	41	7.720965e+000	0	0	0	0	0	0	2.48788	0	0	57.5363	40.4483
DATA	1996	24	41	0	0	A_64_P093088	NM_001000816	7757.67	350.5	3.141678e+001	1.306609e+001	135	41	1.026688e+001	0	0	0	0	0	0	30.7255	1	0	65	40.8621
DATA	1997	24	42	0	0	A_44_P489608	NM_023967	7783.42	350.573	3.112829e+002	3.360235e+001	409	44	8.158379e+000	0	0	0	0	0	0	305.103	1	1	57.5363	44.3226
DATA	1998	24	43	0	0	A_44_P213088	ENSRNOT00000037507	7808.58	350.573	5.969429e+001	1.396963e+001	165.5	44.5	1.076468e+001	0	0	0	0	0	0	58.6248	1	0	57.5363	46.2143
DATA	1999	24	44	0	0	A_64_P060725	NM_001025278	7834	350.545	2.439183e+001	1.284078e+001	129	45.5	1.450320e+001	0	0	0	0	0	0	23.9986	1	0	55.8519	47.625
DATA	2000	24	45	0	0	A_44_P384698	XM_216321	7859.52	350.349	4.455422e+003	4.457200e+002	4473.5	44	1.005096e+001	0	0	0	0	0	0	4390.82	1	1	44.4243	44.0857
DATA	2001	24	46	0	0	A_42_P696084	NM_031022	7885	350.343	3.814737e+003	3.816806e+002	3914	39	9.713900e+000	0	0	0	1	0	0	3765.01	1	1	45.4864	41.2121
DATA	2002	24	47	0	0	A_64_P014918	NM_001108246	7910.37	350.36	5.603526e+003	5.604932e+002	5501	42	1.212119e+001	0	0	0	0	0	0	5537.74	1	1	48.8603	44.56
DATA	2003	24	48	0	0	A_64_P032690	ENSRNOT00000049975	7935.52	350.282	1.044284e+005	1.044285e+004	104913	46.5	1.144109e+001	0	0	0	0	0	0	103319	1	1	47.8731	45.5385
DATA	2004	24	49	0	0	A_42_P481516	NM_134364	7961.13	350.474	2.124197e+004	2.124234e+003	20663	48	1.236149e+001	0	0	0	0	0	0	21037.1	1	1	50.1463	49.5217
DATA	2005	24	50	0	0	A_64_P166158	ENSRNOT00000013694	7986.42	350.573	3.780980e+002	3.982703e+001	474	42.5	1.276021e+001	0	0	0	0	0	0	374.752	1	1	57.5363	47.0667
DATA	2006	24	51	0	0	A_64_P140338	A_64_P140338	8011.55	350.539	1.255552e+001	1.255355e+001	114	44	8.464775e+000	0	0	0	0	0	0	10.7521	0	0	49.5074	43.037
DATA	2007	24	52	0	1	ERCC-00062_278	ERCC-00062_278	8037.06	350.5	2.195515e+002	2.526459e+001	325.5	46.5	8.970557e+000	0	0	0	0	0	0	217.846	1	1	47.2035	47.2143
DATA	2008	24	53	0	0	A_64_P110838	NM_001013175	8062.56	350.483	1.560272e+003	1.565269e+002	1633	42	1.283192e+001	0	0	0	0	0	0	1548.61	1	1	52.9257	42.4839
DATA	2009	24	54	0	0	A_42_P802358	NM_001024341	8088.2	350.69	1.312145e+004	1.312204e+003	12657	41	8.980137e+000	0	0	0	0	0	0	13025.2	1	1	47.2035	41
DATA	2010	24	55	0	0	A_64_P010421	A_64_P010421	8113.41	350.557	4.934741e+001	1.343508e+001	152	43	9.104754e+000	0	0	0	0	0	0	48.983	1	0	47.8731	43
DATA	2011	24	56	0	0	A_43_P13320	NM_138880	8138.53	350.656	1.941747e+001	1.264837e+001	124.5	44.5	1.005959e+001	0	0	0	0	0	0	19.2703	1	0	44.7812	44.3333
DATA	2012	24	57	0	0	A_42_P800916	NM_022403	8163.97	350.468	7.502853e+001	1.458155e+001	179	38.5	8.412201e+000	0	0	0	0	0	0	74.4318	1	1	43.7019	38.5938
DATA	2013	24	58	0	0	A_42_P554610	XM_001064863	8190	350.797	1.659291e+004	1.659338e+003	16167	40	7.885606e+000	0	0	0	0	0	0	16452.3	1	1	46.8651	39.9211
DATA	2014	24	59	0	0	A_42_P476353	NM_001012113	8215.16	350.897	1.390502e+004	1.390558e+003	13514.5	40	7.576168e+000	0	0	0	0	0	0	13777.8	1	1	46.5243	41.1143
DATA	2015	24	60	0	0	A_43_P12234	NM_022516	8240.7	350.9	6.697662e+003	6.698833e+002	6525.5	39.5	9.148142e+000	0	0	0	0	0	0	6630.72	1	1	47.2035	40.3667
DATA	2016	24	61	0	0	A_64_P048315	ENSRNOT00000044039	8265.6	350.963	8.369623e+002	8.463062e+001	921	42.5	9.045528e+000	0	0	0	0	0	0	827.784	1	1	49.8279	43.2813
DATA	2017	24	62	0	0	A_44_P477047	NM_171983	8291.1	351	1.006066e+005	1.006067e+004	98559.5	46	1.571987e+001	0	0	0	0	0	0	99387.7	1	1	48.5334	49.3429
DATA	2018	24	63	0	0	A_43_P11871	NM_017230	8316.26	351.058	1.081491e+002	1.658373e+001	209	43	1.276058e+001	0	0	0	0	0	0	106.701	1	1	46.5243	46.2414
DATA	2019	24	64	0	0	A_64_P060608	XM_001068783	8341.61	351.069	9.263867e+001	1.563132e+001	194.5	43	1.050706e+001	0	0	0	0	0	0	91.2648	1	1	53.8203	43.3143
DATA	2020	24	65	0	0	A_64_P115811	NM_001008516	8367.13	350.866	4.906258e+001	1.353172e+001	154	43	1.052013e+001	0	0	0	0	0	0	48.2563	1	0	46.1809	42.8387
DATA	2021	24	66	0	0	A_44_P131296	ENSRNOT00000039892	8392.5	351.352	5.714790e+001	1.386518e+001	162	42	8.551181e+000	0	0	0	0	0	0	56.1122	1	0	57.5363	41.7714
DATA	2022	24	67	0	0	A_44_P668388	NM_001109245	8418.09	351.386	9.240621e+002	9.326897e+001	1020	40.5	9.889870e+000	0	0	0	0	0	0	905.586	1	1	57.259	43.5714
DATA	2023	24	68	0	0	A_64_P069729	NM_019189	8443.5	350.814	2.145843e+002	2.492636e+001	314	37	8.455611e+000	0	0	0	0	0	0	209.859	1	1	47.2035	37.6429
DATA	2024	24	69	1028	1	(+)E1A_r60_1	E1A_r60_1	8468.94	350.627	1.276044e+001	1.271078e+001	99	37.5	6.279045e+000	0	0	0	0	0	0	-6.38219	0	0	45.835	38.1563
DATA	2025	24	70	0	0	A_64_P165441	NM_001109059	8494.35	350.723	5.311353e+001	1.380284e+001	157	39.5	7.428428e+000	0	0	0	0	0	0	51.7115	1	0	45.1352	40.3077
DATA	2026	24	71	0	0	A_44_P1034910	NM_201562	8519.72	350.949	7.074825e+003	7.075978e+002	6914	42	1.003391e+001	0	0	0	0	0	0	6871.47	1	1	49.1849	41.625
DATA	2027	24	72	0	0	A_42_P631818	NM_030854	8545.05	350.758	5.615563e+002	5.759675e+001	646	43.5	1.189568e+001	0	0	0	0	0	0	544.019	1	1	45.835	43.4167
DATA	2028	24	73	0	0	A_64_P095620	ENSRNOT00000031258	8570.3	350.813	7.764992e+001	1.500333e+001	182	40	8.191615e+000	0	0	0	0	0	0	75.0253	1	1	45.1352	41.1111
DATA	2029	24	74	0	0	A_42_P726573	NM_053838	8595.94	350.825	6.359128e+003	6.360431e+002	6201	41.5	8.261783e+000	0	0	0	0	0	0	6126.88	1	1	45.4864	41.4688
DATA	2030	24	75	0	0	A_64_P029142	NM_001107866	8621.42	350.901	4.363138e+002	4.550168e+001	524.5	40.5	1.099321e+001	0	0	0	0	0	0	419.156	1	1	47.8731	42.6667
DATA	2031	24	76	0	0	A_43_P22902	NM_001106874	8646.47	351.132	1.300028e+001	1.294968e+001	103	40	7.351690e+000	0	0	0	0	0	0	-7.77287	0	0	46.8651	39.1212
DATA	2032	24	77	0	0	A_42_P619008	NM_001013079	8672.14	350.97	8.569409e+003	8.570394e+002	8161.5	40	9.035700e+000	0	0	0	0	0	0	8182.16	1	1	46.5243	40.4815
DATA	2033	24	78	0	0	A_64_P054421	A_64_P054421	8697.71	351	2.800367e+001	1.333041e+001	137	40	9.371868e+000	0	0	0	0	0	0	26.6516	1	0	47.8731	40.2963
DATA	2034	24	79	0	0	A_42_P627330	NM_001106628	8722.83	351.171	2.693961e+003	2.697133e+002	2681.5	39	8.590540e+000	0	0	0	0	0	0	2555.54	1	1	46.8651	40.4063
DATA	2035	24	80	0	0	A_64_P049613	A_64_P049613	8748.33	351.5	3.759645e+001	1.364807e+001	146	39	9.962894e+000	0	0	0	0	0	0	35.5438	1	0	57.5363	40.4815
DATA	2036	24	81	0	0	A_42_P708614	NM_001130505	8773.5	351.5	6.848404e+004	6.848417e+003	64629.5	43	9.436722e+000	0	0	0	0	0	0	64521.4	1	1	57.5363	45.1379
DATA	2037	24	82	0	0	A_42_P660068	NM_031350	8799	351.278	3.477540e+003	3.480050e+002	3374	39	1.083126e+001	0	0	0	0	0	0	3264.52	1	1	47.8731	38.871
DATA	2038	24	83	66	1	DarkCorner	DarkCorner	8824.41	351.575	1.331282e+001	1.326101e+001	80	42	7.103629e+000	0	0	0	0	0	0	-32.9323	0	0	50.7771	42
DATA	2039	24	84	66	1	DarkCorner	DarkCorner	8850.05	351.22	1.336336e+001	1.331135e+001	87	43	1.251809e+001	0	0	0	0	0	0	-29.4253	0	0	44.0646	44.3429
DATA	2040	24	85	66	1	DarkCorner	DarkCorner	8875.11	351.5	1.341292e+001	1.336072e+001	92.5	37	9.335840e+000	0	0	0	0	0	0	-20.9323	0	0	56.9804	37.2189
DATA	2041	25	1	66	1	DarkCorner	DarkCorner	6729.23	357.049	1.557446e+001	1.551384e+001	93	36	8.180489e+000	0	0	0	0	0	0	-18.8716	0	0	49.5074	36.5958
DATA	2042	25	2	66	1	DarkCorner	DarkCorner	6754.56	357.208	1.547078e+001	1.541057e+001	88	38	8.768471e+000	0	0	0	0	0	0	-22.7333	0	0	49.1849	38.7813
DATA	2043	25	3	0	0	A_64_P106975	A_64_P106975	6780.16	357.103	7.691911e+002	7.842756e+001	729	41	8.807210e+000	0	0	0	0	0	0	623.262	1	1	46.5243	41.5185
DATA	2044	25	4	0	0	A_42_P799702	NM_145093	6805.72	357.095	1.342659e+003	1.351243e+002	1151	39	9.606095e+000	0	0	0	1	0	0	1095.21	1	1	48.8603	40.0909
DATA	2045	25	5	0	0	A_42_P704429	NM_053428	6831.12	357	2.956349e+004	2.956387e+003	23735	48	9.814603e+000	0	0	0	1	0	0	24274.2	1	1	49.8279	46.8667
DATA	2046	25	6	0	0	A_64_P129730	NM_001033896	6856.5	357.352	1.143492e+002	1.886698e+001	200	50	1.119710e+001	0	0	0	0	0	0	94.5139	1	1	57.5363	49
DATA	2047	25	7	0	0	A_64_P156308	NM_001008284	6881.63	357	1.182392e+003	1.191758e+002	1079	48.5	1.292803e+001	0	0	0	0	0	0	983.553	1	1	48.5334	47.5769
DATA	2048	25	8	0	0	A_44_P152029	A_44_P152029	6907.42	357.427	2.243241e+001	1.498155e+001	129	43	1.261949e+001	0	0	0	0	0	0	18.7843	1	0	65	44.4194
DATA	2049	25	9	0	0	A_42_P751152	NM_001106360	6932.5	357.352	6.960649e+004	6.960664e+003	58962	49	1.342350e+001	0	0	0	0	0	0	58656	1	1	57.5363	47.0952
DATA	2050	25	10	0	0	A_64_P010494	NM_001001421	6958	357.455	2.353977e+002	2.771332e+001	307	40	1.089685e+001	0	0	0	0	0	0	199.637	1	1	55.8519	42.5
DATA	2051	25	11	0	0	A_64_P054606	NM_001107279	6983.03	357.215	6.008315e+002	6.181645e+001	619	43	6.916968e+000	0	0	0	0	0	0	512.703	1	1	45.835	42.6111
DATA	2052	25	12	0	0	A_44_P335679	NM_001108168	7008.58	357.427	1.483631e+002	2.070671e+001	235	40	9.717294e+000	0	0	0	0	0	0	127.399	1	1	57.5363	41.6774
DATA	2053	25	13	0	0	A_64_P128766	NM_001034912	7034.42	357.427	3.980309e+002	4.231253e+001	440.5	44	9.378468e+000	0	0	0	0	0	0	343.928	1	1	57.5363	44.2069
DATA	2054	25	14	0	0	A_42_P595591	NM_031011	7059.56	356.973	3.150933e+004	3.150966e+003	26680	46	9.629608e+000	0	0	0	0	0	0	27388.2	1	1	48.5334	44.963
DATA	2055	25	15	0	0	A_44_P962846	ENSRNOT00000058887	7084.91	357.134	1.086599e+003	1.095819e+002	1033.5	39	9.922979e+000	0	0	0	0	0	0	950.142	1	1	46.5243	40.5862
DATA	2056	25	16	0	0	A_64_P111878	XR_005569	7110.22	356.917	6.524140e+002	6.674824e+001	701	42.5	1.046005e+001	0	0	0	0	0	0	573.814	1	1	44.7812	42.3667
DATA	2057	25	17	0	0	A_64_P149225	NM_001100833	7135.58	357.427	1.203195e+005	1.203196e+004	106506	44	6.811140e+000	0	0	0	0	0	0	106443	1	1	57.5363	42.9655
DATA	2058	25	18	0	0	A_64_P032361	ENSRNOT00000061428	7161.13	357.5	7.143258e+003	7.144618e+002	6399	45	9.204954e+000	0	0	0	0	0	0	6355.64	1	1	49.8279	45.2581
DATA	2059	25	19	0	0	A_64_P038843	A_64_P038843	7186.5	357.5	3.805716e+001	1.437643e+001	143	37.5	9.801611e+000	0	0	0	0	0	0	34.0497	1	0	57.5363	37.8438
DATA	2060	25	20	1028	1	(+)E1A_r60_a97	E1A_r60_a97	7211.89	357.5	1.384204e+001	1.378817e+001	107	38.5	1.735369e+001	0	0	0	0	0	0	-2.30132	0	0	56.9804	42.5667
DATA	2061	25	21	0	0	A_42_P586883	NM_001106416	7237.42	357.427	2.208414e+002	2.599610e+001	304.5	45.5	1.163120e+001	0	0	0	0	0	0	199.734	1	1	57.5363	44.9722
DATA	2062	25	22	0	0	A_42_P626023	NM_001107265	7262.74	357.222	2.937911e+003	2.941077e+002	2683.5	41.5	6.139903e+000	0	0	0	0	0	0	2670.91	1	1	47.5395	43.0714
DATA	2063	25	23	0	0	A_64_P304646	ENSRNOT00000046873	7288.11	357.5	2.460790e+002	2.810339e+001	341	42.5	9.897806e+000	0	0	0	0	0	0	224.864	1	1	56.9804	43.9211
DATA	2064	25	24	0	0	A_42_P540711	NM_133568	7313.49	357.37	2.214409e+004	2.214450e+003	20563	42	1.051155e+001	0	0	0	0	0	0	20335.5	1	1	48.5334	41.7241
DATA	2065	25	25	0	0	A_64_P079149	XM_001063529	7338.89	357.5	4.943981e+002	5.123443e+001	571	40.5	9.502002e+000	0	0	0	0	0	0	456.229	1	1	56.9804	40.875
DATA	2066	25	26	0	0	A_42_P507072	FQ213070	7364.44	357.397	1.905880e+004	1.905927e+003	16872.5	41	7.869138e+000	0	0	0	0	0	0	17670.7	1	1	50.1463	41.56
DATA	2067	25	27	0	0	A_44_P314270	ENSRNOT00000015469	7389.43	357.608	4.204624e+002	4.410498e+001	500.5	40.5	1.174996e+001	0	0	0	0	0	0	391.605	1	1	49.1849	43.3077
DATA	2068	25	28	0	0	A_64_P026098	ENSRNOT00000027092	7415.11	357.5	2.644019e+002	2.957817e+001	355	43	9.759699e+000	0	0	0	0	0	0	247.358	1	1	56.9804	43.7
DATA	2069	25	29	0	0	A_64_P018599	XM_229548	7439.78	357.703	1.325456e+001	1.320297e+001	108	42	8.865923e+000	0	0	0	0	0	0	-2.68917	0	0	48.8603	43.641
DATA	2070	25	30	0	0	A_43_P15907	NM_001134567	7465.84	357.288	5.978974e+001	1.444312e+001	166	46	8.529361e+000	0	0	0	0	0	0	56.4075	1	0	48.2044	45
DATA	2071	25	31	0	0	A_64_P151804	A_64_P151804	7491.42	357.573	1.404840e+002	1.920466e+001	244.5	44.5	7.865554e+000	0	0	0	0	0	0	133.075	1	1	57.5363	43.4375
DATA	2072	25	32	0	0	A_42_P642743	NM_017005	7516.75	357.356	3.269317e+004	3.269343e+003	30719.5	44	8.970036e+000	0	0	0	0	0	0	31087.2	1	1	48.5334	42.3333
DATA	2073	25	33	0	0	A_42_P630463	NM_022238	7541.93	357.726	9.629936e+002	9.717239e+001	1012	45	1.106899e+001	0	0	0	0	0	0	919.076	1	1	48.2044	44.6786
DATA	2074	25	34	0	0	A_64_P119533	NM_001000351	7567.13	358	4.805058e+001	1.381327e+001	154	47.5	1.104678e+001	0	0	0	0	0	0	46.0215	1	0	46.8651	47.0313
DATA	2075	25	35	0	0	A_64_P158068	FQ219182	7592.85	357.836	6.069497e+003	6.070869e+002	5895.5	42	8.716929e+000	0	0	0	0	0	0	5833.04	1	1	47.5395	42.2121
DATA	2076	25	36	0	0	A_64_P000779	XM_225838	7618.42	357.573	7.911091e+001	1.510280e+001	179.5	39	8.837420e+000	0	0	0	0	0	0	76.2741	1	1	57.5363	41
DATA	2077	25	37	0	0	A_44_P630082	ENSRNOT00000020640	7643.54	357.614	3.621964e+002	3.842359e+001	455.5	38.5	1.111573e+001	0	0	0	0	0	0	350.268	1	1	47.5395	41.1786
DATA	2078	25	38	0	0	A_42_P717654	XM_001063683	7669.25	357.589	8.945109e+003	8.946023e+002	8593	46	1.133328e+001	0	0	0	0	0	0	8675.89	1	1	48.5334	45.4545
DATA	2079	25	39	0	0	A_42_P792382	NM_017257	7694.56	357.479	1.706685e+004	1.706733e+003	16600.5	49	1.202706e+001	0	0	0	0	0	0	16598.2	1	1	48.2044	48.6897
DATA	2080	25	40	0	0	A_64_P075035	NM_001001014	7719.5	357.657	2.492388e+002	2.798285e+001	348	42	9.807009e+000	0	0	0	0	0	0	243.01	1	1	47.8731	43.625
DATA	2081	25	41	0	0	A_64_P021281	NM_001039022	7745.2	357.761	7.414180e+003	7.415266e+002	7376	41	1.017160e+001	0	0	0	0	0	0	7246.53	1	1	46.8651	42.3333
DATA	2082	25	42	0	0	A_44_P729533	TC581820	7770.56	357.972	1.513491e+004	1.513544e+003	14807	43	9.754516e+000	0	0	0	0	0	0	14826	1	1	48.2044	40.7667
DATA	2083	25	43	0	0	A_42_P802358	NM_001024341	7796.07	357.786	1.301693e+004	1.301754e+003	12750	44	7.471456e+000	0	0	0	0	0	0	12777.5	1	1	46.8651	44.4138
DATA	2084	25	44	0	0	A_42_P481087	XM_232226	7821.56	357.972	8.499467e+003	8.500403e+002	8498	43	1.010755e+001	0	0	0	0	0	0	8359.16	1	1	48.2044	43.3448
DATA	2085	25	45	0	0	A_42_P561597	NM_001106486	7847	357.797	2.225917e+004	2.225953e+003	21896	41	1.260812e+001	0	0	0	0	0	0	21929.4	1	1	46.8651	43.8889
DATA	2086	25	46	0	0	A_64_P113381	A_64_P113381	7872	358	1.261990e+001	1.259687e+001	113	41	8.737067e+000	0	0	0	0	0	0	7.9942	0	0	46.8651	41.6757
DATA	2087	25	47	0	0	A_64_P088695	NM_001134414	7897.76	357.971	6.622022e+003	6.623211e+002	6631	42	1.179603e+001	0	0	0	0	0	0	6543.22	1	1	46.1809	42.7097
DATA	2088	25	48	0	0	A_44_P728586	ENSRNOT00000013367	7922.87	357.855	3.752835e+003	3.754929e+002	3818	42.5	1.049817e+001	0	0	0	0	0	0	3712.62	1	1	45.4864	45.2857
DATA	2089	25	49	0	0	A_42_P544898	NM_001108279	7948.82	358	2.718555e+002	2.993188e+001	367	46	1.202051e+001	0	0	0	0	0	0	269.233	1	1	47.2035	45.2759
DATA	2090	25	50	0	0	A_44_P432910	NM_012814	7973.5	358.352	1.512676e+005	1.512677e+004	148766	43	1.357301e+001	0	0	0	0	0	0	149940	1	1	57.5363	48.32
DATA	2091	25	51	0	0	A_64_P157820	XM_001079095	7999.27	357.803	3.476911e+002	3.694948e+001	448	42.5	5.740619e+000	0	0	0	0	0	0	344.877	1	1	45.835	43.5417
DATA	2092	25	52	0	0	A_42_P601802	NM_134465	8024.5	358.352	4.611349e+003	4.613043e+002	4492.5	44	9.291944e+000	0	0	0	0	0	0	4576.63	1	1	57.5363	43.2667
DATA	2093	25	53	0	0	A_64_P039737	NM_001130508	8049.88	357.657	6.270842e+002	6.394088e+001	738	44	9.827676e+000	0	0	0	0	0	0	622.572	1	1	45.835	42.8947
DATA	2094	25	54	0	0	A_42_P648800	AA998304	8075.37	357.735	6.177631e+002	6.302647e+001	727	42	1.098813e+001	0	0	0	0	0	0	613.449	1	1	46.5243	41.8966
DATA	2095	25	55	0	0	A_64_P007009	ENSRNOT00000014567	8100.5	358.231	2.118767e+003	2.122445e+002	2201	43	8.257352e+000	0	0	0	0	0	0	2104.12	1	1	49.8279	43.0357
DATA	2096	25	56	0	0	A_64_P049527	TC606896	8126.05	358.171	1.272747e+003	1.278862e+002	1380.5	43	7.963235e+000	0	0	0	0	0	0	1263.79	1	1	50.7771	43.4815
DATA	2097	25	57	0	0	A_44_P281595	NM_001037556	8151.6	358.151	4.259493e+002	4.438986e+001	523	42	9.976361e+000	0	0	0	0	0	0	422.829	1	1	48.5334	42.25
DATA	2098	25	58	0	0	A_44_P374638	NM_024391	8176.73	358.137	4.714849e+001	1.336038e+001	146	39	7.814337e+000	0	0	0	0	0	0	46.7823	1	0	48.2044	38.3714
DATA	2100	25	60	0	0	A_64_P046416	A_64_P046416	8227.58	358.427	1.237333e+002	1.760099e+001	227.5	40	8.144906e+000	0	0	0	0	0	0	122.606	1	1	57.5363	40.3143
DATA	2101	25	61	0	0	A_44_P428560	NM_001001358	8253	358.455	6.752906e+001	1.423329e+001	169	42	9.703674e+000	0	0	0	0	0	0	66.8519	1	1	55.8519	42.1935
DATA	2102	25	62	0	0	A_44_P208887	NM_001105774	8278.42	358.427	3.418883e+002	3.641704e+001	441.5	46	1.072748e+001	0	0	0	0	0	0	338.094	1	1	57.5363	45.3103
DATA	2103	25	63	0	0	A_42_P533792	NM_001106575	8303.92	358.167	3.088221e+004	3.088246e+003	29645	43	1.341058e+001	0	0	0	0	0	0	30501.3	1	1	46.8651	45.4571
DATA	2104	25	64	0	0	A_42_P802550	NM_017365	8329.41	358.169	1.759749e+003	1.764237e+002	1762	48	9.238965e+000	0	0	0	0	0	0	1735.63	1	1	47.5395	50.1071
DATA	2105	25	65	0	0	A_42_P545129	ENSRNOT00000007554	8354.92	358.167	4.903199e+003	4.904816e+002	4768.5	44	1.055492e+001	0	0	0	0	0	0	4828.57	1	1	46.8651	45.2778
DATA	2106	25	66	0	0	A_42_P500675	NM_013179	8379.89	358.5	5.127460e+002	5.280385e+001	609	43	8.474613e+000	0	0	0	0	0	0	504.121	1	1	56.9804	42.6176
DATA	2107	25	67	0	0	A_44_P127238	NM_001127655	8405.42	358.409	1.878141e+003	1.882389e+002	1924.5	41.5	1.414067e+001	0	0	0	0	0	0	1843.17	1	1	52.9257	44.9615
DATA	2108	25	68	0	0	A_64_P042142	ENSRNOT00000027371	8430.47	358.278	1.718903e+002	2.135014e+001	273	37	7.830070e+000	0	0	0	0	0	0	168.363	1	1	48.2044	36.32
DATA	2109	25	69	0	0	A_44_P279756	NM_022848	8456.42	358.046	1.274044e+001	1.271538e+001	111	37	8.329375e+000	0	0	0	0	0	0	7.71581	0	0	45.1352	37.3871
DATA	2110	25	70	0	0	A_64_P119597	NM_001106871	8481.44	357.986	1.575300e+001	1.281595e+001	124	39	6.431294e+000	0	0	0	0	0	0	15.3628	1	0	47.8731	39.8077
DATA	2111	25	71	0	0	A_44_P790674	NM_001191933	8507.21	358.316	3.767941e+002	3.977779e+001	471.5	43	7.680888e+000	0	0	0	0	0	0	366.592	1	1	49.5074	43.2174
DATA	2112	25	72	0	0	A_44_P405618	ENSRNOT00000025426	8532.56	358.389	1.477411e+003	1.482929e+002	1524	38.5	1.097428e+001	0	0	0	0	0	0	1433.86	1	1	48.2044	40.2778
DATA	2113	25	73	0	0	A_42_P719478	NM_001191779	8558	358.5	1.742607e+002	2.163008e+001	274.5	40	9.125696e+000	0	0	0	0	0	0	168.684	1	1	48.5334	40.7241
DATA	2114	25	74	0	0	A_64_P061424	A_64_P061424	8583.11	358.5	6.882397e+001	1.457552e+001	169.5	41	8.285850e+000	0	0	0	0	0	0	66.4426	1	1	65	41.0303
DATA	2115	25	75	0	0	A_44_P1042876	NM_212504	8608.69	358.662	4.367216e+003	4.369117e+002	4274	44	8.639610e+000	0	0	0	0	0	0	4204.13	1	1	48.5334	43
DATA	2116	25	76	0	0	A_44_P470043	NM_001108103	8633.58	358.573	4.078751e+002	4.278556e+001	500	42	7.911944e+000	0	0	0	0	0	0	391.509	1	1	57.5363	41.4333
DATA	2117	25	77	0	0	A_64_P108484	ENSRNOT00000046584	8659.42	358.573	7.644031e+001	1.504841e+001	181	43	9.491224e+000	0	0	0	0	0	0	73.1458	1	1	57.5363	41.4
DATA	2118	25	78	0	0	A_42_P666065	NM_001014069	8684.69	358.483	2.614159e+003	2.617391e+002	2574	40	8.065465e+000	0	0	0	0	0	0	2493.64	1	1	52.3208	39.8621
DATA	2119	25	79	0	0	A_64_P136571	NM_001134545	8710.12	358.652	2.816219e+002	3.103694e+001	387	40	7.285961e+000	0	0	0	0	0	0	267.769	1	1	46.5243	40.9091
DATA	2120	25	80	0	0	A_42_P816740	NM_001108705	8735.63	358.488	9.396138e+002	9.486872e+001	991	39	4.465060e+000	0	0	0	0	0	0	890.388	1	1	52.3208	38.1304
DATA	2121	25	81	0	0	A_64_P018142	NM_001100716	8760.93	358.718	6.994994e+002	7.117229e+001	762	43	9.802005e+000	0	0	0	0	0	0	660.606	1	1	47.2035	43.7
DATA	2122	25	82	0	0	A_42_P779687	ENSRNOT00000034449	8786.5	358.769	2.754923e+004	2.754955e+003	25345.5	43	1.062122e+001	0	0	0	1	0	0	25925.8	1	1	49.8279	44.1034
DATA	2124	25	84	66	1	DarkCorner	DarkCorner	8837	358.681	1.332773e+001	1.327586e+001	82	44	8.400333e+000	0	0	0	0	0	0	-29.7054	0	0	65	44.9677
DATA	2125	25	85	66	1	DarkCorner	DarkCorner	8862.57	358.583	1.337794e+001	1.332587e+001	89	41	1.416416e+001	0	0	0	0	0	0	-24.3153	0	0	48.2044	42.7442
DATA	2126	26	1	66	1	DarkCorner	DarkCorner	6742.03	364.816	1.549963e+001	1.543930e+001	94	38	8.715994e+000	0	0	0	0	0	0	-17.7491	0	0	48.8603	37.3404
DATA	2127	26	2	66	1	DarkCorner	DarkCorner	6767.6	364.718	1.539679e+001	1.533687e+001	88.5	41	8.577490e+000	0	0	0	0	0	0	-19.1611	0	0	50.4627	42.36
DATA	2128	26	3	0	0	A_42_P713844	NM_001106167	6792.88	364.603	1.782874e+003	1.789373e+002	1583	39	7.136771e+000	0	0	0	0	0	0	1451.39	1	1	48.5334	40.1724
DATA	2129	26	4	0	0	A_42_P627219	NM_001012468	6818.06	364.494	2.355331e+004	2.355380e+003	18710.5	44	1.034811e+001	0	0	0	1	0	0	19299.3	1	1	50.4627	44.25
DATA	2130	26	5	0	0	A_42_P461003	NM_001044283	6843.75	364.373	3.478181e+004	3.478214e+003	28582	49	7.822768e+000	0	0	0	0	0	0	28688.5	1	1	46.1809	49.9355
DATA	2131	26	6	0	0	A_44_P1019923	NM_022522	6869.04	364.139	6.645668e+003	6.647347e+002	5449.5	44	1.102046e+001	0	0	0	0	0	0	5516.88	1	1	46.8651	44.9688
DATA	2132	26	7	0	0	A_42_P814056	NM_001108866	6894.37	364.36	1.289436e+004	1.289521e+003	10572.5	43.5	1.332738e+001	0	0	0	0	0	0	10773.9	1	1	48.8603	46.7143
DATA	2133	26	8	0	0	A_42_P795269	NM_001134730	6919.75	364.627	1.801871e+004	1.801931e+003	15281.5	46.5	1.000992e+001	0	0	0	0	0	0	15152.9	1	1	49.1849	47.9615
DATA	2134	26	9	0	0	A_42_P763522	NM_001013980	6945.19	364.467	9.063328e+003	9.064513e+002	7596	43	1.289682e+001	0	0	0	0	0	0	7670.31	1	1	49.5074	45.3478
DATA	2135	26	10	0	0	A_44_P292437	NM_153309	6970.56	364.532	1.361424e+003	1.369192e+002	1238	41	6.870695e+000	0	0	0	0	0	0	1159.45	1	1	49.8279	41.8387
DATA	2136	26	11	0	0	A_64_P065313	ENSRNOT00000042070	6995.91	364.658	3.939510e+002	4.196986e+001	433	44	7.909766e+000	0	0	0	0	0	0	337.603	1	1	49.1849	43.5758
DATA	2137	26	12	0	0	A_64_P008047	NM_001033670	7021.56	364.74	3.714039e+004	3.714067e+003	31545	44	9.970545e+000	0	0	0	0	0	0	32026.7	1	1	49.5074	43
DATA	2138	26	13	0	0	A_64_P080612	TC638889	7046.8	364.319	8.493876e+003	8.495079e+002	7419	44	7.759380e+000	0	0	0	0	0	0	7368.24	1	1	47.2035	44.8519
DATA	2139	26	14	0	0	A_43_P17696	NM_001004257	7072.31	364.389	6.423942e+003	6.425514e+002	5587	45.5	9.954925e+000	0	0	0	0	0	0	5606.27	1	1	48.2044	44.2857
DATA	2140	26	15	0	0	A_64_P019608	NM_001105713	7097.38	364.522	1.347639e+003	1.355027e+002	1266	41.5	9.572544e+000	0	0	0	0	0	0	1182.99	1	1	53.5237	40.8214
DATA	2141	26	16	0	0	A_64_P108575	ENSRNOT00000046600	7123	364.545	2.133583e+002	2.554513e+001	298	42	9.270657e+000	0	0	0	0	0	0	188.39	1	1	55.8519	42.5152
DATA	2142	26	17	0	0	A_64_P136859	NM_001109642	7148.46	364.824	2.199348e+004	2.199392e+003	19406.5	44	8.600640e+000	0	0	0	0	0	0	19531.7	1	1	48.8603	43.6667
DATA	2143	26	18	0	0	A_64_P021597	A_64_P021597	7173.58	364.573	1.394473e+001	1.390529e+001	115	41	7.292709e+000	0	0	0	0	0	0	5.7343	0	0	57.5363	41.7059
DATA	2144	26	19	0	0	A_64_P148032	A_64_P148032	7198.97	365.078	3.029456e+002	3.329529e+001	389.5	40	1.608746e+001	0	0	0	0	0	0	272.025	1	1	45.835	38.963
DATA	2145	26	20	0	0	A_42_P743580	NM_017214	7224.33	364.725	3.822653e+004	3.822678e+003	34705	40.5	1.034125e+001	0	0	0	0	0	0	34508.1	1	1	52.9257	40.3077
DATA	2146	26	21	0	0	A_42_P693964	NM_181087	7250.08	364.608	1.087117e+004	1.087203e+003	9835.5	42	7.089176e+000	0	0	0	0	0	0	9866.03	1	1	48.8603	42.8205
DATA	2147	26	22	0	0	A_44_P1058389	NM_012992	7275.52	364.853	3.559381e+004	3.559407e+003	31691	41	8.242559e+000	0	0	0	0	0	0	32470.4	1	1	49.8279	40.8387
DATA	2148	26	23	0	0	A_44_P135224	NM_022187	7301.01	364.824	4.005623e+002	4.227915e+001	471	41.5	1.041201e+001	0	0	0	0	0	0	367.254	1	1	46.8651	43.1176
DATA	2149	26	24	0	0	A_64_P070249	ENSRNOT00000048236	7326.27	364.822	1.462958e+003	1.469139e+002	1422	38	8.809422e+000	0	0	0	0	0	0	1347.84	1	1	48.2044	38.0345
DATA	2150	26	25	0	0	A_42_P806899	NM_001108829	7351.5	364.648	1.141269e+002	1.760137e+001	211	41	8.479780e+000	0	0	0	0	0	0	105.642	1	1	57.5363	42.36
DATA	2151	26	26	0	0	A_42_P465144	NM_001107714	7377	364.681	1.479548e+002	1.991999e+001	251	39	7.241488e+000	0	0	0	0	0	0	137.592	1	1	65	39.9286
DATA	2152	26	27	0	0	A_43_P19712	NM_001106751	7402.23	365.116	5.392326e+001	1.433124e+001	158	41	1.123844e+001	0	0	0	0	0	0	50.3724	1	0	46.5243	44.1429
DATA	2153	26	28	0	0	A_42_P728472	NM_001007600	7427.78	365.084	3.696934e+004	3.696958e+003	34455.5	43.5	9.648733e+000	0	0	0	0	0	0	34685.9	1	1	49.8279	44.5882
DATA	2154	26	29	66	-1	(-)3xSLv1	NegativeControl	7453.5	365	1.321575e+001	1.316432e+001	90	42	8.463879e+000	0	0	0	0	0	0	-13.7887	0	0	54.1152	42.6176
DATA	2155	26	30	0	0	A_42_P629394	NM_031683	7478.7	364.9	8.283367e+003	8.284404e+002	7813.5	46	9.181140e+000	0	0	0	0	0	0	7836.12	1	1	47.2035	46.28
DATA	2156	26	31	0	0	A_64_P041977	A_64_P041977	7504	365	5.704217e+001	1.425199e+001	162	40	9.209425e+000	0	0	0	0	0	0	54.1729	1	0	54.9904	41.3438
DATA	2157	26	32	0	0	A_44_P126406	XM_228958	7529.36	364.781	2.633885e+004	2.633917e+003	24881.5	44	1.298192e+001	0	0	0	0	0	0	25107.4	1	1	44.7812	44.0303
DATA	2158	26	33	0	0	A_64_P021878	NM_001167664	7554.38	365	1.147772e+002	1.731619e+001	215.5	46	1.233221e+001	0	0	0	0	0	0	109.801	1	1	48.5334	47.6
DATA	2159	26	34	0	0	A_64_P058719	NM_001014175	7580.13	365.145	1.163738e+004	1.163810e+003	11118.5	42	9.032769e+000	0	0	0	0	0	0	11171.9	1	1	45.4864	41.8182
DATA	2160	26	35	0	0	A_42_P495579	NM_001107564	7605.63	365	2.116092e+003	2.120007e+002	2094.5	46	1.206418e+001	0	0	0	0	0	0	2038.14	1	1	48.5334	44.4828
DATA	2161	26	36	0	0	A_64_P054979	NM_001109615	7630.67	364.972	1.791441e+002	2.203981e+001	274	44	1.266835e+001	0	0	0	0	0	0	173.077	1	1	48.8603	45.4444
DATA	2162	26	37	0	0	A_44_P713838	ENSRNOT00000032874	7656.45	364.677	7.124393e+002	7.238469e+001	785.5	45.5	1.435206e+001	0	0	0	0	0	0	690.371	1	1	45.1352	45.5333
DATA	2163	26	38	0	0	A_64_P158913	NM_001108101	7681.54	364.817	7.592249e+001	1.485192e+001	180.5	45	9.075245e+000	0	0	0	0	0	0	73.7754	1	1	47.5395	46.0588
DATA	2164	26	39	0	0	A_43_P13018	NM_054004	7707.34	365.122	2.175263e+004	2.175300e+003	21057	43	1.026295e+001	0	0	0	0	0	0	21194.7	1	1	48.8603	45.9286
DATA	2165	26	40	0	0	A_64_P114383	A_64_P114383	7732.63	365	3.562069e+004	3.562092e+003	34703	45	1.412651e+001	0	0	0	0	0	0	34792.2	1	1	48.5334	47.4074
DATA	2166	26	41	0	0	A_43_P16629	XM_001080634	7758.24	364.871	9.114739e+003	9.115620e+002	8793	43	9.500975e+000	0	0	0	0	0	0	8923.4	1	1	46.5243	42.25
DATA	2167	26	42	0	0	A_42_P810313	NM_001108677	7783.34	365.057	3.636761e+002	3.850250e+001	448	48.5	7.690654e+000	0	0	0	0	0	0	356.799	1	1	46.8651	45.8846
DATA	2168	26	43	0	0	A_42_P537516	NM_001106023	7808.69	365.338	2.497494e+004	2.497526e+003	24363	45	1.039941e+001	0	0	0	0	0	0	24551.4	1	1	48.5334	47.1724
DATA	2169	26	44	0	0	A_64_P006964	A_64_P006964	7834	365.455	2.526157e+002	2.822728e+001	364	38.5	6.598433e+000	0	0	0	0	0	0	248.781	1	1	55.8519	39.4063
DATA	2170	26	45	0	0	A_42_P829251	NM_133381	7859.42	365.427	1.143412e+002	1.699568e+001	221	42	8.832417e+000	0	0	0	0	0	0	112.79	1	1	57.5363	42.5588
DATA	2171	26	46	0	0	A_42_P687443	NM_020100	7884.87	364.857	7.540941e+002	7.644763e+001	845	41	9.708818e+000	0	0	0	0	0	0	744.929	1	1	45.4864	42.2647
DATA	2172	26	47	0	0	A_44_P196146	NM_031349	7910.35	364.984	5.356553e+002	5.501377e+001	640	50	9.497368e+000	0	0	0	0	0	0	529.838	1	1	44.0646	50
DATA	2173	26	48	0	0	A_64_P050137	ENSRNOT00000058586	7935.64	364.871	3.825031e+002	4.024903e+001	483.5	42	7.060726e+000	0	0	0	0	0	0	378.772	1	1	46.8651	43.5769
DATA	2174	26	49	0	0	A_44_P637827	NM_001108797	7961.31	365.243	9.571884e+003	9.572702e+002	9317	46	1.217237e+001	0	0	0	0	0	0	9487.92	1	1	48.8603	47.4
DATA	2175	26	50	0	0	A_64_P070073	NM_001109590	7986.5	365.5	2.611932e+002	2.895783e+001	361.5	45	1.302666e+001	0	0	0	0	0	0	259.109	1	1	57.5363	48.4231
DATA	2176	26	51	0	0	A_64_P130572	NM_001109400	8011.75	365.39	3.636682e+003	3.638828e+002	3686.5	41	9.692265e+000	0	0	0	0	0	0	3609.87	1	1	49.8279	40.24
DATA	2177	26	52	0	0	A_42_P658815	NM_198745	8037.18	365.379	5.879066e+003	5.880392e+002	6037	42.5	1.016342e+001	0	0	0	0	0	0	5838.38	1	1	45.4864	42.9118
DATA	2179	26	54	0	0	A_43_P14809	TC581403	8087.83	365.3	2.659998e+003	2.662926e+002	2717	42	9.472531e+000	0	0	0	0	0	0	2642.67	1	1	47.2035	41.8929
DATA	2180	26	55	0	0	A_42_P553319	TC597248	8113.32	365.382	3.674530e+002	3.880857e+001	474.5	40.5	7.833394e+000	0	0	0	0	0	0	365.046	1	1	46.5243	40.5
DATA	2181	26	56	0	0	A_64_P004162	NM_019139	8138.73	365.366	1.253687e+001	1.250942e+001	109.5	45	1.224896e+001	0	0	0	0	0	0	7.25564	0	0	47.8731	44.4138
DATA	2182	26	57	0	0	A_64_P032450	NM_172330	8164.13	365.5	3.536570e+002	3.750728e+001	453	38	1.037138e+001	0	0	0	0	0	0	351.142	1	1	44.4243	38.9677
DATA	2183	26	58	0	0	A_44_P470976	NM_001013133	8189.68	365.479	2.584915e+002	2.871252e+001	357.5	39.5	7.607432e+000	0	0	0	0	0	0	256.517	1	1	47.8731	38.8889
DATA	2184	26	59	0	0	A_64_P166428	NM_001037205	8214.89	365.5	7.923757e+002	8.021867e+001	875	41	9.754725e+000	0	0	0	0	0	0	785.787	1	1	56.9804	41.8919
DATA	2185	26	60	0	0	A_43_P11576	NM_012821	8240.42	365.573	3.101898e+001	1.289685e+001	131.5	40	9.598947e+000	0	0	0	0	0	0	30.7351	1	0	65	41.8387
DATA	2186	26	61	0	0	A_64_P156910	A_64_P156910	8265.58	365.573	2.797567e+002	3.065380e+001	378	47	9.339412e+000	0	0	0	0	0	0	276.923	1	1	57.5363	44.7692
DATA	2187	26	62	0	0	A_64_P126140	NM_001191648	8291	365.545	1.337722e+002	1.833930e+001	232	41	1.313695e+001	0	0	0	0	0	0	132.264	1	1	55.8519	45.2727
DATA	2188	26	63	0	0	A_42_P637122	NM_001108351	8316.69	365.465	3.790878e+003	3.792959e+002	3726	45.5	9.779977e+000	0	0	0	0	0	0	3743.2	1	1	47.8731	46.4412
DATA	2189	26	64	0	0	A_64_P081208	NM_001009712	8341.88	365.662	1.953183e+004	1.953223e+003	19189	46	1.061572e+001	0	0	0	0	0	0	19258.7	1	1	45.4864	46.625
DATA	2190	26	65	0	0	A_42_P465608	NM_130894	8367.26	365.453	9.852624e+003	9.853429e+002	9763	44	9.636289e+000	0	0	0	0	0	0	9699.24	1	1	52.0157	42.5161
DATA	2191	26	66	0	0	A_42_P485589	NM_017246	8392.73	365.863	7.508838e+002	7.614176e+001	821	39	8.302084e+000	0	0	0	0	0	0	737.925	1	1	48.2044	39.9643
DATA	2192	26	67	0	0	A_64_P031383	NM_020308	8418.13	365.757	1.474955e+003	1.480365e+002	1518	36.5	9.625218e+000	0	0	0	0	0	0	1446.77	1	1	46.5243	39.1
DATA	2193	26	68	0	0	A_44_P220647	NM_001107097	8443.43	365.843	5.048296e+002	5.204878e+001	605	38	9.855586e+000	0	0	0	0	0	0	494.193	1	1	47.5395	38.8485
DATA	2194	26	69	0	0	A_44_P294687	NM_080885	8469.06	365.538	1.291243e+003	1.297472e+002	1364	39.5	7.162051e+000	0	0	0	0	0	0	1261.27	1	1	44.7812	39.9643
DATA	2195	26	70	0	0	A_42_P512838	NM_001106884	8494.39	365.406	1.707589e+003	1.712326e+002	1730	41	7.162051e+000	0	0	0	0	0	0	1664.15	1	1	47.5395	39.4643
DATA	2196	26	71	0	0	A_42_P635228	NM_001107651	8519.63	365.367	1.275970e+002	1.804374e+001	231	44	1.260852e+001	0	0	0	0	0	0	124.054	1	1	42.9674	43.8438
DATA	2197	26	72	0	0	A_44_P254687	NM_001105728	8545.14	365.803	7.564442e+002	7.671808e+001	835.5	39	9.758034e+000	0	0	0	0	0	0	733.594	1	1	46.8651	41.0541
DATA	2198	26	73	0	0	A_64_P049628	NM_001169145	8570.37	365.795	1.207578e+004	1.207646e+003	11501	43	7.517612e+000	0	0	0	0	0	0	11680.2	1	1	49.5074	42.9167
DATA	2199	26	74	0	0	A_64_P007703	NM_031674	8595.64	365.742	1.750350e+002	2.171934e+001	279	40	7.694527e+000	0	0	0	0	0	0	168.836	1	1	46.1809	41.6333
DATA	2200	26	75	0	0	A_42_P645376	NM_001014135	8621.28	365.882	3.983197e+004	3.983218e+003	38052	42.5	9.387936e+000	0	0	0	0	0	0	38310.3	1	1	48.8603	44.0667
DATA	2201	26	76	0	0	A_64_P040920	XM_577408	8646.73	365.887	8.075250e+003	8.076285e+002	7767.5	41	9.210913e+000	0	0	0	0	0	0	7743.59	1	1	44.7812	40.1818
DATA	2202	26	77	0	0	A_42_P819656	NM_130409	8672.13	366	8.490812e+003	8.491803e+002	8156	40	9.310843e+000	0	0	0	0	0	0	8117.07	1	1	48.5334	41.6071
DATA	2203	26	78	0	0	A_64_P018921	NM_001135012	8697.63	366.014	5.157682e+002	5.319392e+001	599	40	8.246659e+000	0	0	0	0	0	0	491.492	1	1	47.2035	39.6897
DATA	2204	26	79	0	0	A_43_P15253	NM_012967	8722.97	365.723	1.500104e+003	1.505777e+002	1514	39	6.068066e+000	0	0	0	0	0	0	1424.8	1	1	45.4864	37.9167
DATA	2205	26	80	0	0	A_64_P093063	NM_001136272	8748.27	365.839	5.101934e+002	5.267507e+001	602	40.5	1.298638e+001	0	0	0	0	0	0	482.963	1	1	44.7812	42.3846
DATA	2206	26	81	0	0	A_44_P477406	NM_012751	8773.5	365.886	6.814900e+002	6.940573e+001	758	42	1.011129e+001	0	0	0	0	0	0	642.913	1	1	47.8731	42.6429
DATA	2207	26	82	0	0	A_64_P056816	NM_001100697	8798.91	366.386	2.645278e+002	2.956056e+001	360	40.5	9.606545e+000	0	0	0	0	0	0	248.687	1	1	65	41.2857
DATA	2208	26	83	0	0	A_42_P580733	NM_001006981	8824.37	365.735	1.446672e+004	1.446733e+003	13576	40	8.876373e+000	0	0	0	0	0	0	13550.5	1	1	46.5243	40.04
DATA	2209	26	84	66	1	DarkCorner	DarkCorner	8849.41	366.176	1.334166e+001	1.328974e+001	80	44	1.237720e+001	0	0	0	0	0	0	-31.0895	0	0	48.8603	46.3235
DATA	2210	26	85	66	1	DarkCorner	DarkCorner	8875.07	365.722	1.339268e+001	1.334055e+001	92	37	9.282189e+000	0	0	0	0	0	0	-23.1032	0	0	47.5395	37.418
DATA	2211	27	1	66	1	DarkCorner	DarkCorner	6729.21	372.178	1.553002e+001	1.546958e+001	92.5	36	8.786244e+000	0	0	0	0	0	0	-18.2268	0	0	47.8731	36.1384
DATA	2212	27	2	66	1	DarkCorner	DarkCorner	6754.89	371.5	1.542855e+001	1.536850e+001	86.5	37.5	9.361988e+000	0	0	0	0	0	0	-21.597	0	0	56.9804	40.1944
DATA	2213	27	3	0	0	A_44_P289922	NM_139103	6780.14	371.743	2.101619e+003	2.107157e+002	1753	40	9.655685e+000	0	0	0	0	0	0	1707.41	1	1	48.2044	40.9677
DATA	2214	27	4	0	0	A_64_P117149	ENSRNOT00000065538	6805.58	371.573	1.522706e+001	1.516780e+001	109.5	41	9.348910e+000	0	0	0	0	0	0	-1.26409	0	0	57.5363	42.9286
DATA	2215	27	5	0	0	A_42_P524308	NM_019213	6830.95	371.27	4.658218e+003	4.660655e+002	3797	48	1.315278e+001	0	0	0	0	0	0	3834.09	1	1	48.8603	49.9355
DATA	2216	27	6	0	0	A_64_P037562	XM_001070892	6856.17	371.743	6.051277e+002	6.233735e+001	613	45	9.727830e+000	0	0	0	0	0	0	501.337	1	1	46.8651	46.4545
DATA	2217	27	7	0	0	A_44_P267706	XR_085883	6881.73	371.649	2.026147e+002	2.513541e+001	276	44	1.092620e+001	0	0	0	0	0	0	168.954	1	1	48.5334	45.1034
DATA	2218	27	8	0	0	A_64_P082569	XM_001053354	6907.42	371.573	1.483664e+001	1.478306e+001	111	46.5	1.136689e+001	0	0	0	0	0	0	2.94309	0	0	57.5363	48.3846
DATA	2219	27	9	0	0	A_64_P000539	NM_053930	6932.43	371.843	1.501260e+004	1.501332e+003	12609.5	46	1.209114e+001	0	0	0	0	0	0	12679.5	1	1	47.5395	47.25
DATA	2220	27	10	0	0	A_43_P22124	NM_213625	6957.72	371.8	8.069369e+003	8.070689e+002	6692	44.5	1.225827e+001	0	0	0	0	0	0	6858.14	1	1	49.1849	47.1563
DATA	2221	27	11	0	0	A_44_P1012556	NM_001013988	6983.26	372.232	5.916661e+002	6.091800e+001	599	41.5	6.493383e+000	0	0	0	0	0	0	506.049	1	1	46.8651	41.3571
DATA	2222	27	12	0	0	A_64_P115457	NM_001106361	7008.32	372	2.470043e+002	2.859896e+001	322	39	9.600000e+000	0	0	0	0	0	0	212.542	1	1	49.1849	41.92
DATA	2223	27	13	0	0	A_64_P064229	A_64_P064229	7034.5	372	4.676509e+001	1.506884e+001	152	43	8.133959e+000	0	0	0	0	0	0	40.4934	1	0	54.1152	43.1935
DATA	2224	27	14	0	0	A_64_P039066	ENSRNOT00000041345	7059.48	372.055	9.901728e+001	1.734457e+001	194.5	46	9.569955e+000	0	0	0	0	0	0	86.2461	1	1	48.5334	47.2593
DATA	2225	27	15	0	0	A_42_P574960	ENSRNOT00000068719	7084.78	371.866	3.272329e+003	3.275390e+002	2955	44	9.845006e+000	0	0	0	0	0	0	2867.03	1	1	46.1809	42.8
DATA	2226	27	16	0	0	A_42_P600215	NM_175844	7110.5	372	6.609688e+001	1.554854e+001	167	42	8.128919e+000	0	0	0	0	0	0	58.2538	1	0	54.1152	41.7353
DATA	2227	27	17	0	0	A_42_P607770	NM_001134616	7135.83	372	9.711246e+003	9.712254e+002	8373	44	1.021812e+001	0	0	0	1	0	0	8607.89	1	1	46.8651	44.08
DATA	2228	27	18	0	0	A_64_P003348	NM_001077660	7161	371.797	2.337335e+003	2.341474e+002	2164	43	7.560113e+000	0	0	0	0	0	0	2083.3	1	1	46.8651	41.9697
DATA	2229	27	19	0	0	A_64_P057828	A_64_P057828	7186.23	372.101	2.231319e+003	2.235607e+002	2089	42	1.059068e+001	0	0	0	0	0	0	1999.82	1	1	46.5243	41.3448
DATA	2230	27	20	0	0	A_64_P081765	NM_134355	7211.91	372.065	3.667748e+002	3.917512e+001	438.5	38.5	8.852225e+000	0	0	0	0	0	0	330.522	1	1	65	38.6563
DATA	2231	27	21	0	0	A_42_P758886	NM_019258	7237	371.783	3.681609e+002	3.927999e+001	447	41	9.684999e+000	0	0	0	0	0	0	333.5	1	1	44.0646	42.5278
DATA	2232	27	22	0	0	A_42_P745470	XM_001066818	7262.76	371.667	1.021532e+004	1.021623e+003	9362.5	42	9.997682e+000	0	0	0	0	0	0	9302.18	1	1	45.4864	42.5294
DATA	2233	27	23	0	0	A_42_P800949	NM_031787	7288.09	372.386	7.756166e+002	7.873665e+001	803	40	8.759166e+000	0	0	0	0	0	0	709.911	1	1	57.259	41.0333
DATA	2234	27	24	0	0	A_42_P738559	NM_012801	7313.58	371.899	2.995564e+004	2.995594e+003	26698	43.5	1.167211e+001	0	0	0	0	0	0	27552.5	1	1	47.2035	43.3571
DATA	2235	27	25	0	0	A_42_P749550	NM_001109359	7339.25	372.373	1.649614e+004	1.649668e+003	14855	38	7.552118e+000	0	0	0	0	0	0	15247.3	1	1	49.1849	37.9655
DATA	2236	27	26	0	0	A_64_P007493	ENSRNOT00000006658	7364.24	372.141	1.983854e+002	2.391690e+001	292	41	7.691720e+000	0	0	0	0	0	0	184.206	1	1	47.5395	42.6552
DATA	2237	27	27	0	0	A_64_P056182	NM_053363	7389.79	372.268	2.908843e+003	2.911881e+002	2771.5	40	8.988762e+000	0	0	0	0	0	0	2713.3	1	1	47.2035	41.7419
DATA	2238	27	28	0	0	A_42_P818546	NM_001191600	7415.17	372.171	2.890291e+003	2.893322e+002	2831.5	42	8.034993e+000	0	0	0	0	0	0	2707.83	1	1	46.8651	43.3056
DATA	2239	27	29	0	0	A_44_P407948	XM_001055260	7440.25	372.36	5.067037e+001	1.412401e+001	154	42.5	9.052235e+000	0	0	0	0	0	0	47.6722	1	0	49.1849	42.7647
DATA	2240	27	30	66	-1	(-)3xSLv1	NegativeControl	7465.6	372.247	1.318131e+001	1.313001e+001	88	45	7.515795e+000	0	0	0	0	0	0	-16.9131	0	0	48.5334	44.7778
DATA	2241	27	31	0	0	A_64_P044505	NM_031587	7491.06	371.969	1.359392e+003	1.365668e+002	1405	45	8.965863e+000	0	0	0	0	0	0	1289.27	1	1	46.8651	43.3793
DATA	2242	27	32	0	0	A_42_P685138	NM_153621	7516.84	371.821	1.629261e+003	1.634461e+002	1627.5	42	1.162351e+001	0	0	0	0	0	0	1551.19	1	1	46.1809	43.2
DATA	2243	27	33	0	0	A_64_P121747	ENSRNOT00000050332	7542	372.455	1.303088e+001	1.304006e+001	118.5	44	8.490650e+000	0	0	0	0	0	0	11.9297	0	0	55.8519	42.3448
DATA	2244	27	34	0	0	A_42_P791436	NM_012750	7567.31	372.338	7.098572e+003	7.099750e+002	6828	47	1.158113e+001	0	0	0	0	0	0	6806.99	1	1	48.5334	46.4516
DATA	2245	27	35	0	0	A_44_P349309	NM_001100890	7592.8	372.31	2.169064e+003	2.172892e+002	2157	47	9.198034e+000	0	0	0	0	0	0	2086.96	1	1	47.2035	44.0938
DATA	2246	27	36	0	0	A_42_P502621	NM_024401	7618.13	372.243	2.768958e+002	3.052631e+001	366	44	1.247813e+001	0	0	0	0	0	0	267.263	1	1	46.5243	46
DATA	2247	27	37	0	0	A_43_P21574	NM_001012043	7643.76	372.265	4.561879e+002	4.738363e+001	552.5	44	1.197271e+001	0	0	0	0	0	0	441.667	1	1	46.5243	43.5938
DATA	2248	27	38	0	0	A_44_P496331	NM_001001085	7668.89	372.5	1.002545e+002	1.623913e+001	202	45	1.161791e+001	0	0	0	0	0	0	97.341	1	1	56.9804	44.7
DATA	2249	27	39	0	0	A_64_P016503	ENSRNOT00000003659	7694.5	372.5	2.388833e+002	2.707330e+001	344	43	7.893890e+000	0	0	0	0	0	0	232.575	1	1	57.5363	43.5278
DATA	2250	27	40	0	0	A_43_P13270	NM_134415	7720	372.5	2.770298e+004	2.770327e+003	26679.5	45	1.362223e+001	0	0	0	0	0	0	27040.4	1	1	48.5334	49.5
DATA	2251	27	41	0	0	A_42_P553960	NM_001107831	7745.43	372.392	1.198574e+004	1.198641e+003	11267.5	45	1.095735e+001	0	0	0	0	0	0	11726.8	1	1	49.1849	43.2857
DATA	2252	27	42	0	0	A_44_P428997	NM_001107661	7770.48	372.393	1.301924e+003	1.308055e+002	1375	45	7.780334e+000	0	0	0	0	0	0	1276.58	1	1	52.9257	43.4783
DATA	2253	27	43	0	0	A_42_P619926	NM_001106578	7795.89	372.5	1.041246e+003	1.048871e+002	1140	44	8.818020e+000	0	0	0	0	0	0	1023.08	1	1	56.9804	44.3667
DATA	2255	27	45	0	0	A_44_P524471	NM_001106408	7846.94	372.304	1.648039e+003	1.652832e+002	1713	40	8.433305e+000	0	0	0	0	0	0	1625.12	1	1	46.1809	41.2778
DATA	2256	27	46	0	0	A_43_P10009	XM_347035	7872.2	372.375	6.229915e+003	6.231181e+002	6235	40	8.965372e+000	0	0	0	0	0	0	6152.73	1	1	50.4627	41.4706
DATA	2257	27	47	0	0	A_64_P068112	A_64_P068112	7897.3	372.367	5.902124e+003	5.903456e+002	6324.5	44	1.015234e+001	0	0	0	0	0	0	5836.92	1	1	43.3362	46.1515
DATA	2258	27	48	0	0	A_44_P191715	NM_021666	7922.81	372.57	1.257586e+001	1.258535e+001	113	45	8.533615e+000	0	0	0	0	0	0	11.994	0	0	58.0869	46.375
DATA	2259	27	49	0	0	A_64_P035769	NM_001108962	7948.35	372.533	1.606493e+003	1.611360e+002	1705	43	9.985019e+000	0	0	0	0	0	0	1592.35	1	1	42.5954	43.0938
DATA	2260	27	50	0	0	A_64_P158469	XM_579990	7973.58	372.573	2.454890e+001	1.274175e+001	126	48	1.287075e+001	0	0	0	0	0	0	24.3539	1	0	57.5363	49.2609
DATA	2261	27	51	0	0	A_43_P12811	NM_053464	7999.07	372.739	3.798830e+003	3.800884e+002	3848	44.5	9.899495e+000	0	0	0	0	0	0	3771.35	1	1	46.5243	44
DATA	2262	27	52	0	0	A_44_P370694	NM_001107961	8024.5	372.648	3.402336e+001	1.294266e+001	136	41	1.006782e+001	0	0	0	0	0	0	33.7952	1	0	57.5363	40.5333
DATA	2263	27	53	0	0	A_42_P749550	NM_001109359	8049.93	372.405	1.666662e+004	1.666709e+003	16702	43	8.466015e+000	0	0	0	0	0	0	16560.7	1	1	51.4001	42.5641
DATA	2264	27	54	0	0	A_64_P125893	ENSRNOT00000021391	8075.37	372.37	2.522644e+004	2.522675e+003	24712.5	41.5	9.998611e+000	0	0	0	0	0	0	25071.2	1	1	48.2044	40.25
DATA	2265	27	55	0	0	A_44_P1000653	NM_031531	8100.68	372.506	7.159754e+002	7.267707e+001	811	43	9.347822e+000	0	0	0	0	0	0	711.603	1	1	50.4627	42.1034
DATA	2266	27	56	0	0	A_64_P035992	A_64_P035992	8126	372.681	9.511690e+002	9.593231e+001	1087	45.5	7.954508e+000	0	0	0	0	0	0	945.253	1	1	58.0869	46.125
DATA	2267	27	57	0	0	A_42_P592385	NM_022935	8151.5	373	1.253349e+001	1.249320e+001	106	45.5	1.397448e+001	0	0	0	0	0	0	4.57621	0	0	54.1152	43.6154
DATA	2268	27	58	0	0	A_64_P065624	ENSRNOT00000039260	8176.5	373	2.418307e+001	1.272215e+001	125	40.5	9.187448e+000	0	0	0	0	0	0	24.0156	1	0	54.1152	41.0667
DATA	2269	27	59	0	1	ERCC-00097_63	ERCC-00097_63	8202.23	372.788	6.769564e+001	1.421361e+001	167	41	9.579012e+000	0	0	0	0	0	0	67.185	1	1	45.835	42.0333
DATA	2270	27	60	0	0	A_42_P477625	NM_001108719	8227.7	372.9	1.088976e+004	1.089048e+003	10753	42	1.133863e+001	0	0	0	0	0	0	10799.4	1	1	47.2035	44.125
DATA	2271	27	61	0	0	A_42_P788030	NM_031618	8253.22	372.916	3.883302e+004	3.883322e+003	37707.5	44.5	9.657348e+000	0	0	0	0	0	0	38475.3	1	1	49.8279	43.6667
DATA	2272	27	62	0	0	A_44_P278247	XM_219377	8278.63	373	2.033361e+004	2.033400e+003	20127	41	9.315399e+000	0	0	0	0	0	0	20124.8	1	1	48.5334	42.88
DATA	2273	27	63	0	0	A_44_P189262	NM_024000	8303.79	372.907	1.963313e+004	1.963353e+003	19239	43	1.133141e+001	0	0	0	0	0	0	19407.9	1	1	48.2044	45.6486
DATA	2274	27	64	0	0	A_44_P212850	NM_019305	8329.37	372.779	1.029385e+002	1.624330e+001	205	46	9.618321e+000	0	0	0	0	0	0	101.616	1	1	46.5243	47.4375
DATA	2275	27	65	0	0	A_64_P144278	NM_001106525	8354.94	372.825	1.775114e+004	1.775159e+003	17455	44	1.008750e+001	0	0	0	0	0	0	17496.4	1	1	45.4864	44.4848
DATA	2276	27	66	0	0	A_44_P683816	NM_001127488	8379.91	373.386	1.135833e+003	1.142805e+002	1213	41	7.921878e+000	0	0	0	0	0	0	1117.75	1	1	57.259	40.4483
DATA	2277	27	67	0	0	A_64_P048712	A_64_P048712	8405.44	372.71	2.497146e+002	2.798275e+001	350.5	35	7.864053e+000	0	0	0	0	0	0	245.284	1	1	46.8651	37.52
DATA	2278	27	68	0	0	A_64_P012813	NM_001106456	8430.58	373.427	2.201891e+001	1.284162e+001	125	36	1.200546e+001	0	0	0	0	0	0	21.5878	1	0	57.5363	38.2581
DATA	2280	27	70	0	0	A_42_P598602	NM_001077646	8481.52	372.944	2.806742e+002	3.080953e+001	379.5	41	6.968593e+000	0	0	0	0	0	0	273.993	1	1	48.2044	40.8065
DATA	2281	27	71	0	0	A_44_P375380	NM_001191572	8507.01	372.643	5.640491e+002	5.782495e+001	647.5	42	8.451045e+000	0	0	0	0	0	0	549.323	1	1	46.5243	41.1429
DATA	2282	27	72	0	0	A_64_P113555	NM_001000025	8532.42	373.427	2.153966e+001	1.294729e+001	127	45	1.213451e+001	0	0	0	0	0	0	20.927	1	0	57.5363	44.3939
DATA	2283	27	73	0	0	A_42_P590466	NM_001009676	8557.94	372.627	5.340918e+003	5.342452e+002	5203.5	42.5	7.568346e+000	0	0	0	1	0	0	5175.28	1	1	45.835	41.5882
DATA	2284	27	74	0	0	A_44_P224987	XM_001058317	8583	373.455	1.198283e+002	1.755844e+001	224.5	40.5	6.472666e+000	0	0	0	0	0	0	115.811	1	1	55.8519	41.6333
DATA	2285	27	75	0	0	A_42_P557315	NM_001106280	8608.65	373.222	1.181315e+004	1.181385e+003	11310	45	9.596413e+000	0	0	0	0	0	0	11384.6	1	1	47.5395	46.3448
DATA	2286	27	76	0	0	A_44_P375364	A_44_P375364	8633.67	373.5	3.451784e+002	3.685214e+001	436.5	44	1.035867e+001	0	0	0	0	0	0	331.711	1	1	57.5363	43.9706
DATA	2287	27	77	0	0	A_44_P880152	NM_031553	8659.64	372.938	4.148467e+002	4.345828e+001	510.5	41	1.013787e+001	0	0	0	0	0	0	397.415	1	1	45.1352	41.4643
DATA	2288	27	78	0	0	A_64_P057575	NM_001191967	8684.6	372.776	3.346224e+002	3.589431e+001	428	41	9.020259e+000	0	0	0	0	0	0	319.577	1	1	46.5243	41.5714
DATA	2289	27	79	0	0	A_64_P122183	ENSRNOT00000009823	8710	373.455	9.447013e+001	1.609327e+001	201	38	7.901175e+000	0	0	0	0	0	0	89.9383	1	1	55.8519	38.1667
DATA	2290	27	80	0	0	A_64_P057587	NM_019313	8735.69	373.047	1.646502e+002	2.102365e+001	267.5	39	6.200667e+000	0	0	0	0	0	0	156.224	1	1	45.4864	37.6552
DATA	2291	27	81	0	0	A_42_P480769	XM_001081609	8761.04	373.145	2.480233e+003	2.483699e+002	2460	43	1.002005e+001	0	0	0	0	0	0	2345.37	1	1	46.8651	43.5172
DATA	2292	27	82	0	0	A_42_P623151	NM_031026	8786.46	373.386	3.595059e+004	3.595083e+003	33781	44	1.083940e+001	0	0	0	0	0	0	33878.8	1	1	47.5395	45.2759
DATA	2293	27	83	0	0	A_42_P550241	NM_022954	8811.75	373.293	8.717958e+001	1.582644e+001	195	37	8.515012e+000	0	0	0	0	0	0	81.8656	1	1	49.1849	37.375
DATA	2294	27	84	66	1	DarkCorner	DarkCorner	8836.89	373.5	1.330767e+001	1.325587e+001	89.5	45	9.621024e+000	0	0	0	0	0	0	-24.1812	0	0	65	44.2222
DATA	2295	27	85	66	1	DarkCorner	DarkCorner	8862.5	373.5	1.335706e+001	1.330507e+001	83	40	1.162059e+001	0	0	0	0	0	0	-31.9154	0	0	65	41.3696
DATA	2296	28	1	66	1	DarkCorner	DarkCorner	6741.7	379.209	1.545930e+001	1.539913e+001	91	39.5	9.926302e+000	0	0	0	0	0	0	-19.241	0	0	45.835	41.0208
DATA	2297	28	2	0	0	A_42_P802550	NM_017365	6767.5	379	1.684492e+003	1.691423e+002	1431	36.5	8.086176e+000	0	0	0	1	0	0	1365.86	1	1	54.1152	38.1429
DATA	2299	28	4	0	0	A_42_P619926	NM_001106578	6818.54	379.068	1.039266e+003	1.050175e+002	942	45.5	1.030307e+001	0	0	0	0	0	0	853.837	1	1	48.5334	44.7059
DATA	2300	28	5	0	0	A_64_P052441	ENSRNOT00000004876	6843.33	379.076	1.236177e+002	1.943902e+001	212.5	45	1.278565e+001	0	0	0	0	0	0	102.207	1	1	49.1849	47.5172
DATA	2301	28	6	0	0	A_64_P056823	CA510211	6868.97	379.449	1.496195e+001	1.493221e+001	118	44	9.318383e+000	0	0	0	0	0	0	7.67308	0	0	47.5395	45.0323
DATA	2302	28	7	0	0	A_42_P669870	NM_001011919	6894.49	378.875	5.294351e+003	5.296422e+002	4499	44.5	9.165589e+000	0	0	0	1	0	0	4434.29	1	1	47.8731	45.1471
DATA	2303	28	8	0	0	A_42_P683634	NM_012946	6919.77	379.3	1.134585e+005	1.134586e+004	96194.5	45	9.785130e+000	0	0	0	0	0	0	95637.2	1	1	50.7771	46.0345
DATA	2304	28	9	0	0	A_42_P542809	NM_021671	6945.31	379.127	1.645998e+003	1.652480e+002	1445	52	1.306977e+001	0	0	0	0	0	0	1396.23	1	1	47.5395	49.3214
DATA	2305	28	10	0	0	A_64_P065887	ENSRNOT00000024693	6970.74	379.222	1.280330e+003	1.288550e+002	1165	43	9.539877e+000	0	0	0	0	0	0	1092.87	1	1	47.5395	43.75
DATA	2306	28	11	0	0	A_64_P043406	NM_001024902	6996.13	379.229	1.304397e+003	1.312368e+002	1224	44	8.681067e+000	0	0	0	0	0	0	1120.3	1	1	46.5243	43.8667
DATA	2307	28	12	0	0	A_64_P060769	NM_001191090	7021.18	379.379	2.666748e+003	2.670609e+002	2476	39	8.186687e+000	0	0	0	0	0	0	2304.24	1	1	45.4864	41.0857
DATA	2308	28	13	0	0	A_64_P150789	A_64_P150789	7046.5	379.206	1.917415e+001	1.439787e+001	126	43.5	7.632082e+000	0	0	0	0	0	0	16.6669	1	0	46.5243	43.2143
DATA	2309	28	14	0	0	A_64_P110254	NM_022404	7072.27	379.174	1.106914e+004	1.107005e+003	9736	46	9.936694e+000	0	0	0	0	0	0	9679.78	1	1	46.5243	48.2593
DATA	2310	28	15	0	0	A_42_P700753	FQ212883	7097.59	379.254	5.049737e+003	5.051706e+002	4537	41	1.054946e+001	0	0	0	0	0	0	4441.75	1	1	47.5395	42.5714
DATA	2311	28	16	0	0	A_42_P503768	NM_001009466	7123.12	378.862	7.720470e+002	7.846753e+001	774	42	7.182261e+000	0	0	0	0	0	0	682.994	1	1	46.1809	41.0571
DATA	2312	28	17	0	0	A_64_P106021	ENSRNOT00000017892	7148.52	379.362	4.595834e+002	4.802627e+001	517	41	6.264294e+000	0	0	0	0	0	0	408.902	1	1	47.5395	41.2069
DATA	2313	28	18	0	0	A_43_P10861	NM_001024879	7173.67	379.5	9.750239e+002	9.848319e+001	943	39	9.927587e+000	0	0	0	0	0	0	872.294	1	1	57.5363	38.9032
DATA	2314	28	19	0	0	A_44_P562251	BF545174	7198.87	379.38	1.998574e+002	2.428158e+001	285	42	8.701820e+000	0	0	0	0	0	0	179.765	1	1	47.2035	41.3103
DATA	2315	28	20	0	0	A_42_P608768	ENSRNOT00000009898	7224.5	379.5	2.903055e+002	3.210761e+001	366	39	9.434383e+000	0	0	0	0	0	0	262.532	1	1	49.1849	40.4848
DATA	2316	28	21	0	0	A_64_P117115	NM_001109329	7250	379.455	2.507190e+001	1.387281e+001	132.5	43.5	1.077223e+001	0	0	0	0	0	0	22.7922	1	0	55.8519	44.9
DATA	2317	28	22	0	0	A_64_P043331	ENSRNOT00000032411	7275.2	379.465	2.551917e+002	2.890544e+001	345	43	1.031332e+001	0	0	0	0	0	0	233.163	1	1	47.5395	43.7308
DATA	2318	28	23	0	0	A_42_P664274	NM_001079705	7300.69	379.479	2.448048e+003	2.451772e+002	2331	39	1.117053e+001	0	0	0	0	0	0	2247.92	1	1	48.5334	41.7742
DATA	2319	28	24	0	0	A_64_P044593	NM_001173451	7326.18	379.394	1.154129e+003	1.161932e+002	1196	40	8.412229e+000	0	0	0	0	0	0	1064.93	1	1	45.835	40.0323
DATA	2320	28	25	0	0	A_64_P006978	NM_001109371	7351.5	379.5	7.026837e+001	1.511246e+001	174.5	41	8.554519e+000	0	0	0	0	0	0	65.1438	1	1	57.5363	41.5862
DATA	2321	28	26	0	0	A_64_P119390	NM_001109519	7376.93	379.386	8.769683e+001	1.594639e+001	190	43	8.669107e+000	0	0	0	0	0	0	81.6739	1	1	47.5395	42.8182
DATA	2322	28	27	0	0	A_64_P034714	A_64_P034714	7402.29	379.658	2.456040e+001	1.348465e+001	132	40	9.464047e+000	0	0	0	0	0	0	22.9759	1	0	48.2044	42.5455
DATA	2323	28	28	0	0	A_44_P535959	NM_001107650	7427.68	379.603	1.027149e+003	1.035599e+002	1082	41	6.599663e+000	0	0	0	0	0	0	965.022	1	1	46.8651	42
DATA	2324	28	29	0	0	A_64_P286274	ENSRNOT00000055318	7453.33	379.5	7.740099e+002	7.850960e+001	833	42	7.058866e+000	0	0	0	0	0	0	730.249	1	1	57.5363	42.5517
DATA	2325	28	30	0	0	A_44_P333384	NM_001024788	7478.39	379.638	4.788517e+001	1.394294e+001	153	46	1.023474e+001	0	0	0	0	0	0	45.3577	1	0	47.5395	46.6
DATA	2326	28	31	0	0	A_42_P522194	NM_012914	7503.69	379.338	4.092643e+002	4.295511e+001	500	45	1.225003e+001	0	0	0	0	0	0	389.149	1	1	48.5334	45.1316
DATA	2327	28	32	0	0	A_44_P273859	NM_017021	7529.3	379.63	1.304648e+001	1.300486e+001	112	42	1.090191e+001	0	0	0	0	0	0	4.65824	0	0	48.5334	42.5806
DATA	2328	28	33	0	0	A_43_P11665	NM_013024	7554.68	379.716	7.704796e+001	1.506820e+001	183	43	1.036126e+001	0	0	0	0	0	0	73.8012	1	1	48.5334	43.087
DATA	2329	28	34	0	0	A_64_P118273	NM_001170593	7580.14	379.593	1.087359e+002	1.687549e+001	210.5	43	9.003360e+000	0	0	0	0	0	0	104.51	1	1	56.9804	43.8125
DATA	2330	28	35	0	0	A_42_P762814	NM_031318	7605.46	379.824	9.227072e+003	9.227968e+002	8717.5	47	1.042213e+001	0	0	0	0	0	0	8897.42	1	1	48.8603	46
DATA	2331	28	36	0	0	A_44_P384017	NM_031688	7630.73	380.045	5.768873e+002	5.909679e+001	665.5	47	1.171829e+001	0	0	0	0	0	0	558.003	1	1	45.835	46.4194
DATA	2332	28	37	0	0	A_64_P118872	A_64_P118872	7656.17	379.536	2.653722e+001	1.305878e+001	131	47	1.405083e+001	0	0	0	0	0	0	25.7432	1	0	47.2035	47.6774
DATA	2333	28	38	0	0	A_42_P599210	NM_001008326	7681.94	379.776	4.273237e+003	4.275138e+002	4196	42	9.358958e+000	0	0	0	0	0	0	4157.14	1	1	45.835	43.4865
DATA	2334	28	39	0	0	A_44_P305801	NM_001033894	7707.3	379.9	7.353113e+003	7.354213e+002	7184.5	43	1.078162e+001	0	0	0	0	0	0	7172.07	1	1	47.2035	42.3824
DATA	2335	28	40	0	0	A_64_P085462	A_64_P085462	7732.68	379.631	1.178753e+005	1.178754e+004	115182	42.5	1.336471e+001	0	0	0	0	0	0	115253	1	1	51.7088	45.8462
DATA	2336	28	41	0	0	A_42_P488000	NM_001108479	7757.94	379.955	2.348986e+003	2.352393e+002	2455	45	8.352297e+000	0	0	0	0	0	0	2301.99	1	1	46.8651	44.25
DATA	2337	28	42	0	0	A_42_P818546	NM_001191600	7783.36	379.87	2.986751e+003	2.989420e+002	2993	44	7.351910e+000	0	0	0	0	0	0	2933.19	1	1	46.8651	43.5333
DATA	2338	28	43	0	0	A_44_P488489	TC610872	7808.85	379.785	4.018724e+003	4.020700e+002	4037	43	9.101965e+000	0	0	0	0	0	0	3954.38	1	1	45.835	43.1563
DATA	2339	28	44	0	0	A_64_P153971	A_64_P153971	7834	380	1.320548e+001	1.265221e+001	119	43.5	8.510725e+000	0	0	0	0	0	0	13.0172	1	0	54.9904	44
DATA	2340	28	45	0	0	A_64_P077985	NM_001170478	7859.51	379.704	1.349627e+002	1.843844e+001	239	42	9.638145e+000	0	0	0	0	0	0	133.252	1	1	47.2035	44.5769
DATA	2341	28	46	0	0	A_44_P576822	NM_080771	7885	379.797	1.736055e+003	1.740581e+002	1818	42	8.000000e+000	0	0	0	0	0	0	1716.56	1	1	46.8651	43
DATA	2342	28	47	0	0	A_64_P134310	A_64_P134310	7910.21	379.956	1.407219e+002	1.884116e+001	240	49	8.845630e+000	0	0	0	0	0	0	139.321	1	1	46.5243	48.6129
DATA	2343	28	48	0	0	A_64_P134706	NM_001107533	7935.7	379.9	1.576799e+002	2.013063e+001	256	44	7.051096e+000	0	0	0	0	0	0	156.284	1	1	47.2035	45.1111
DATA	2344	28	49	0	0	A_42_P469751	XM_001054007	7961	380	1.091785e+004	1.091857e+003	10872	48	1.169693e+001	0	0	0	0	0	0	10831.5	1	1	46.8651	49
DATA	2345	28	50	0	0	A_64_P082653	ENSRNOT00000020906	7986.48	379.812	2.831611e+002	3.094958e+001	376	48	1.333194e+001	0	0	0	0	0	0	281.138	1	1	47.2035	48.5
DATA	2346	28	51	0	0	A_43_P18902	NM_001109221	8011.64	379.746	6.414842e+002	6.535216e+001	728	43	1.197614e+001	0	0	0	0	0	0	637.287	1	1	46.1809	43.1935
DATA	2347	28	52	0	0	A_64_P086719	ENSRNOT00000065918	8037.37	380.404	1.252802e+001	1.250315e+001	111	43.5	1.035123e+001	0	0	0	0	0	0	7.67908	0	0	57.8122	42.0588
DATA	2348	28	53	0	0	A_64_P138585	TC587165	8062.83	379.677	7.401707e+003	7.402759e+002	7468	41.5	1.007586e+001	0	0	0	0	0	0	7358.67	1	1	45.4864	40.8333
DATA	2349	28	54	0	0	A_64_P230444	ENSRNOT00000010282	8087.83	379.677	1.711063e+004	1.711109e+003	17168	43	9.329917e+000	0	0	0	0	0	0	17013.1	1	1	45.4864	44.1212
DATA	2350	28	55	0	0	A_64_P124427	TC642834	8113.06	379.697	1.455776e+002	1.917190e+001	249	45	1.076198e+001	0	0	0	0	0	0	144.742	1	1	45.835	44.9429
DATA	2351	28	56	0	0	A_42_P778587	NM_001135767	8138.74	380.038	8.916346e+004	8.916355e+003	89220	45	1.413545e+001	0	0	0	0	0	0	88635.1	1	1	49.5074	43.3529
DATA	2352	28	57	0	0	A_42_P526030	NM_057197	8164.37	379.735	1.086617e+004	1.086688e+003	10808	44.5	1.098505e+001	0	0	0	0	0	0	10797.6	1	1	46.5243	42.4667
DATA	2353	28	58	0	0	A_64_P022561	XM_001070923	8189.37	379.735	1.570482e+002	2.006528e+001	257	40	1.060168e+001	0	0	0	0	0	0	155.976	1	1	46.5243	42.0645
DATA	2354	28	59	0	0	A_64_P126226	NM_001105901	8214.89	380.5	2.345545e+002	2.657691e+001	336	38	1.148755e+001	0	0	0	0	0	0	232.804	1	1	56.9804	40.1875
DATA	2355	28	60	0	0	A_64_P089541	NM_001106214	8240.42	380.427	7.335761e+002	7.441625e+001	839	45	9.885319e+000	0	0	0	0	0	0	727.486	1	1	57.5363	45.2667
DATA	2356	28	61	0	0	A_44_P205869	NM_138891	8265.81	379.906	7.404698e+002	7.509803e+001	820	40.5	9.967872e+000	0	0	0	0	0	0	733.572	1	1	45.835	41.6071
DATA	2357	28	62	0	0	A_44_P491796	NM_012881	8291.11	380.5	5.554126e+002	5.693801e+001	632.5	38	7.074399e+000	0	0	0	0	0	0	549.632	1	1	56.9804	38.7667
DATA	2358	28	63	0	0	A_64_P132706	NM_001008304	8316.5	380.5	5.657600e+004	5.657614e+003	55463	45	9.005099e+000	0	0	0	0	0	0	55914.9	1	1	57.5363	46.3824
DATA	2359	28	64	0	0	A_64_P040715	NM_001011979	8342	379.774	3.192941e+003	3.195414e+002	3221	43	9.175667e+000	0	0	0	0	0	0	3150.94	1	1	45.4864	42.9167
DATA	2360	28	65	0	0	A_44_P191055	NM_001107693	8367.5	379.735	6.911148e+003	6.912294e+002	6683	44	9.699167e+000	0	0	0	0	0	0	6809.39	1	1	46.5243	44.0769
DATA	2361	28	66	0	0	A_64_P077493	XR_005942	8392.5	380.5	1.265912e+001	1.262874e+001	110	37	7.732615e+000	0	0	0	0	0	0	6.79062	0	0	57.5363	38.28
DATA	2362	28	67	0	0	A_44_P317600	NM_012612	8418	379.875	2.902764e+002	3.165786e+001	390	35	9.305230e+000	0	0	0	0	0	0	284.987	1	1	45.4864	37.3889
DATA	2363	28	68	0	0	A_42_P751368	NM_001047874	8443.43	380.157	8.110275e+003	8.111263e+002	7786	36.5	1.173701e+001	0	0	0	0	0	0	7946.73	1	1	47.5395	38.3667
DATA	2364	28	69	0	0	A_42_P711568	NM_001107584	8469.06	379.969	1.332793e+004	1.332854e+003	12927	41	9.677043e+000	0	0	0	0	0	0	13031	1	1	46.8651	42.6129
DATA	2365	28	70	0	0	A_64_P091817	A_64_P091817	8494.29	379.833	1.144664e+003	1.151704e+002	1233.5	41	7.383951e+000	0	0	0	0	0	0	1116.64	1	1	45.835	39.9091
DATA	2366	28	71	0	0	A_64_P006628	NM_172328	8519.5	380.5	1.739050e+002	2.156041e+001	284	45	1.257066e+001	0	0	0	0	0	0	169.255	1	1	57.5363	46.25
DATA	2367	28	72	0	0	A_64_P057760	NM_001191643	8545.26	380.016	5.709423e+002	5.850651e+001	660.5	45.5	8.759953e+000	0	0	0	0	0	0	554.248	1	1	45.4864	44.4333
DATA	2368	28	73	0	0	A_44_P150013	NM_001134495	8570.42	380.573	1.286009e+001	1.281004e+001	97	40	6.658328e+000	0	0	0	0	0	0	-6.79986	0	0	57.5363	42.4444
DATA	2369	28	74	0	0	A_44_P526975	NM_001002822	8595.63	380.441	4.580470e+002	4.757167e+001	547	42	8.716000e+000	0	0	0	0	0	0	442.311	1	1	46.8651	44.2593
DATA	2370	28	75	66	-1	(-)3xSLv1	NegativeControl	8621.21	380.537	1.293206e+001	1.288172e+001	82	41	8.054052e+000	0	0	0	0	0	0	-23.5486	0	0	46.5243	40.7917
DATA	2371	28	76	0	0	A_42_P648937	NM_001191732	8646.67	380.443	4.097641e+003	4.099677e+002	3965.5	40	1.047096e+001	0	0	0	0	0	0	3933.91	1	1	47.5395	40.7949
DATA	2372	28	77	0	0	A_44_P533786	NM_053749	8672	380.545	3.321247e+001	1.337804e+001	143	41	9.245129e+000	0	0	0	0	0	0	31.7888	1	0	55.8519	42.1
DATA	2373	28	78	0	0	A_64_P156165	S68987	8697.61	380.406	1.141124e+004	1.141198e+003	10933.5	39	1.031165e+001	0	0	0	0	0	0	10887.4	1	1	47.5395	39.5172
DATA	2374	28	79	0	0	A_64_P084293	NM_001000525	8722.58	380.573	2.313976e+001	1.324551e+001	128	37.5	7.811479e+000	0	0	0	0	0	0	22.0076	1	0	57.5363	37.8158
DATA	2375	28	80	0	0	A_42_P708569	NM_001191837	8748.32	380.618	9.812690e+003	9.813562e+002	9432.5	41	1.002190e+001	0	0	0	0	0	0	9301.22	1	1	46.5243	41.5294
DATA	2376	28	81	0	0	A_64_P112215	NM_001110141	8773.69	380.662	1.526345e+003	1.531982e+002	1544.5	40.5	8.826814e+000	0	0	0	0	0	0	1441.88	1	1	48.5334	41.5333
DATA	2377	28	82	0	0	A_42_P567793	NM_001107668	8798.96	380.667	4.998109e+003	4.999845e+002	4822	35.5	9.130031e+000	0	0	0	0	0	0	4705.19	1	1	48.5334	36.5667
DATA	2378	28	83	0	0	A_42_P481087	XM_232226	8824.63	380.873	8.308913e+003	8.309966e+002	7764	38	8.045081e+000	0	0	0	0	0	0	7794.08	1	1	47.5395	39.16
DATA	2379	28	84	66	1	DarkCorner	DarkCorner	8849.57	380.857	1.332197e+001	1.327012e+001	85	42.5	1.050458e+001	0	0	0	0	0	0	-27.6352	0	0	44.4243	42.8846
DATA	2380	28	85	66	1	DarkCorner	DarkCorner	8875.32	380.368	1.337244e+001	1.332039e+001	87	37	9.600323e+000	0	0	0	0	0	0	-26.3618	0	0	46.5243	37.9634
DATA	2381	29	1	66	1	DarkCorner	DarkCorner	6729.5	386.487	1.548700e+001	1.542672e+001	90	35	8.629143e+000	0	0	0	0	0	0	-20.9702	0	0	49.1849	35.0466
DATA	2382	29	2	66	1	DarkCorner	DarkCorner	6755	386.392	1.538580e+001	1.532591e+001	87	37	1.046168e+001	0	0	0	0	0	0	-24.1188	0	0	49.1849	39.641
DATA	2383	29	3	0	0	A_64_P096512	NM_031782	6780.16	386.234	1.302782e+004	1.302871e+003	10395.5	38	7.820679e+000	0	0	0	0	0	0	10611.9	1	1	49.5074	38.8857
DATA	2384	29	4	0	0	A_44_P172814	NM_173102	6805.44	386.505	4.195091e+004	4.195119e+003	34045.5	46	8.627485e+000	0	0	0	0	0	0	34395.3	1	1	52.9257	45.1724
DATA	2385	29	5	0	0	A_42_P788040	NM_001025053	6831.11	386.5	6.607072e+002	6.775864e+001	651	46	1.564945e+001	0	0	0	0	0	0	545.268	1	1	56.9804	49.0303
DATA	2386	29	6	0	0	A_42_P808945	NM_181368	6856.36	386.333	4.737514e+003	4.739867e+002	3903	44	1.224350e+001	0	0	0	1	0	0	3934.79	1	1	51.7088	46.3548
DATA	2387	29	7	0	0	A_64_P162713	A_64_P162713	6881.44	386.295	3.441831e+001	1.523401e+001	139	48	1.133538e+001	0	0	0	0	0	0	28.7676	1	0	50.1463	48.4571
DATA	2388	29	8	0	0	A_44_P501204	NM_017361	6907.33	386.5	1.605583e+003	1.612338e+002	1463.5	42	8.863723e+000	0	0	0	0	0	0	1350.75	1	1	57.5363	43.9677
DATA	2389	29	9	0	0	A_42_P785926	NM_001108289	6932.69	386.532	3.431217e+003	3.434344e+002	3008	51	1.144303e+001	0	0	0	1	0	0	2904.86	1	1	49.8279	50.4074
DATA	2390	29	10	0	0	A_42_P616287	NM_001134555	6957.81	386.547	9.984019e+002	1.008964e+002	954	47.5	1.232085e+001	0	0	0	0	0	0	850.482	1	1	49.1849	49.3
DATA	2391	29	11	66	-1	(-)3xSLv1	NegativeControl	6983.5	386.5	1.452700e+001	1.447046e+001	87.5	41	7.765974e+000	0	0	0	0	0	0	-20.9485	0	0	57.5363	42.1034
DATA	2392	29	12	0	0	A_43_P12365	NM_023101	7008.65	386.679	1.746378e+002	2.262410e+001	260.5	40.5	1.150625e+001	0	0	0	0	0	0	150.607	1	1	50.7771	42.9231
DATA	2393	29	13	0	0	A_64_P076643	ENSRNOT00000057620	7034.13	386.5	1.435234e+001	1.431321e+001	118	41	6.984577e+000	0	0	0	0	0	0	6.00234	0	0	47.2035	41.9412
DATA	2394	29	14	0	0	A_64_P074865	XR_008898	7059.5	386.5	1.426732e+001	1.422030e+001	113	41.5	6.779501e+000	0	0	0	0	0	0	4.29414	0	0	65	41.0357
DATA	2395	29	15	0	0	A_64_P009582	XM_214287	7085	386.545	6.822979e+004	6.822993e+003	59049	53	1.119628e+001	0	0	0	0	0	0	59901.2	1	1	55.8519	52.76
DATA	2396	29	16	0	0	A_44_P527270	NM_020073	7110.18	386.351	3.925829e+002	4.169606e+001	446.5	40.5	9.851928e+000	0	0	0	0	0	0	346.63	1	1	48.8603	40.3125
DATA	2397	29	17	0	0	A_44_P530813	NM_012922	7135.63	386.605	1.427564e+003	1.434381e+002	1379.5	39	6.669696e+000	0	0	0	0	0	0	1267.7	1	1	50.7771	38.7879
DATA	2398	29	18	0	0	A_64_P078210	NM_001044303	7161.42	386.573	4.245519e+001	1.452350e+001	148	39.5	8.649938e+000	0	0	0	0	0	0	37.9147	1	0	57.5363	40.75
DATA	2399	29	19	0	0	A_42_P764985	NM_133402	7186.52	386.853	8.652334e+003	8.653436e+002	7735	40	9.423103e+000	0	0	0	1	0	0	7769.14	1	1	49.8279	40.4444
DATA	2400	29	20	0	0	A_43_P23097	NM_001011965	7211.73	386.701	2.205702e+002	2.598690e+001	304	42.5	1.155518e+001	0	0	0	0	0	0	199.109	1	1	49.8279	41.5882
DATA	2401	29	21	0	0	A_43_P19450	NM_001105713	7237.51	386.62	6.054128e+002	6.206493e+001	656	39	1.313741e+001	0	0	0	0	0	0	549.419	1	1	47.8731	43.7297
DATA	2402	29	22	0	0	A_42_P514419	NM_001009599	7262.58	386.6	2.442040e+003	2.445823e+002	2278.5	43	8.021983e+000	0	0	0	0	0	0	2227.43	1	1	52.9257	42.931
DATA	2403	29	23	0	0	A_64_P123974	A_64_P123974	7288.09	386.614	1.358337e+001	1.356319e+001	116	42	9.254002e+000	0	0	0	0	0	0	8.62608	0	0	57.259	43.3548
DATA	2404	29	24	0	0	A_64_P221399	NM_134415	7313.5	386.648	8.855937e+003	8.856960e+002	8116	41.5	1.109006e+001	0	0	0	0	0	0	8158.25	1	1	57.5363	42.2143
DATA	2405	29	25	0	0	A_44_P760124	A_44_P760124	7338.88	387	2.754637e+002	3.063276e+001	368	39.5	7.428510e+000	0	0	0	0	0	0	254.981	1	1	45.4864	39.7
DATA	2406	29	26	0	0	A_42_P589551	NM_001037093	7364.33	386.861	6.930112e+003	6.931396e+002	6428	41.5	9.156444e+000	0	0	0	1	0	0	6444.52	1	1	47.8731	42.0882
DATA	2407	29	27	0	0	A_42_P645467	NM_001108804	7389.78	386.904	1.203036e+002	1.791773e+001	220	41.5	9.036912e+000	0	0	0	0	0	0	112.379	1	1	47.8731	43.0294
DATA	2408	29	28	0	0	A_64_P036006	A_64_P036006	7415	387	1.327263e+001	1.322958e+001	112	40	8.528384e+000	0	0	0	0	0	0	4.47522	0	0	54.9904	41
DATA	2409	29	29	0	0	A_64_P088575	NM_001106355	7440.5	387	1.047555e+003	1.055796e+002	1103	42	5.858548e+000	0	0	0	0	0	0	986.966	1	1	54.1152	42.5484
DATA	2410	29	30	0	0	A_42_P798776	XM_002725203	7465.79	386.806	1.032263e+004	1.032347e+003	9844	48	1.105339e+001	0	0	0	0	0	0	9764.91	1	1	47.5395	49.9655
DATA	2411	29	31	0	0	A_64_P017424	XM_001067041	7491.05	387.067	1.311179e+001	1.310510e+001	115	48	1.067686e+001	0	0	0	0	0	0	10.2288	0	0	44.0646	47.2667
DATA	2412	29	32	0	0	A_64_P147358	NM_001105764	7516.74	386.974	1.736494e+003	1.741362e+002	1719	45.5	1.207493e+001	0	0	0	0	0	0	1655.43	1	1	49.1849	45.1176
DATA	2413	29	33	0	0	A_42_P522285	NM_001044263	7542.07	387.2	1.159901e+003	1.167123e+002	1184	42	8.962222e+000	0	0	0	0	0	0	1109.78	1	1	46.8651	42.6071
DATA	2414	29	34	0	0	A_64_P130184	NM_017207	7567.22	387.075	2.584983e+003	2.588210e+002	2581	47	8.898446e+000	0	0	0	0	0	0	2481.78	1	1	45.835	45.4815
DATA	2415	29	35	0	0	A_44_P167930	NM_012720	7592.65	387.084	1.530229e+004	1.530283e+003	14512	47	9.775995e+000	0	0	0	0	0	0	14740.3	1	1	49.8279	46.1515
DATA	2416	29	36	0	0	A_64_P135305	NM_001013426	7618.24	387.296	1.173411e+004	1.173481e+003	11184	45.5	8.451416e+000	0	0	0	0	0	0	11339.4	1	1	47.2035	44.4333
DATA	2417	29	37	0	0	A_64_P100182	NM_001077678	7643.5	387.352	2.561960e+001	1.305109e+001	131.5	47.5	1.096310e+001	0	0	0	0	0	0	24.8319	1	0	57.5363	46.5625
DATA	2418	29	38	0	0	A_44_P521699	NM_001007728	7669.1	386.806	1.476595e+003	1.482099e+002	1532.5	43	1.031606e+001	0	0	0	0	0	0	1435.25	1	1	46.1809	45
DATA	2419	29	39	0	0	A_64_P053516	NM_001001280	7694.17	386.692	1.471224e+001	1.281218e+001	121.5	41.5	9.696178e+000	0	0	0	0	0	0	14.338	1	0	45.4864	41.6111
DATA	2420	29	40	0	0	A_64_P073183	XM_001061392	7719.88	386.956	1.443141e+004	1.443197e+003	13880	44	1.036151e+001	0	0	0	0	0	0	14100.5	1	1	46.8651	44.5333
DATA	2421	29	41	0	0	A_64_P067447	NM_001109440	7745.5	387.056	1.298018e+003	1.304181e+002	1395	41	1.524652e+001	0	0	0	0	0	0	1271.28	1	1	48.5334	43.75
DATA	2422	29	42	0	0	A_64_P089251	NM_001014109	7770.55	387.045	1.299784e+002	1.812854e+001	238	42.5	6.768962e+000	0	0	0	0	0	0	127.576	1	1	45.835	41.0833
DATA	2423	29	43	0	0	A_64_P118192	NM_022797	7795.79	386.97	8.592234e+002	8.684301e+001	946	42.5	7.796201e+000	0	0	0	0	0	0	845.041	1	1	46.1809	42.3529
DATA	2424	29	44	0	0	A_64_P082584	ENSRNOT00000024258	7821	386.774	1.427381e+002	1.903205e+001	240	44	9.535420e+000	0	0	0	0	0	0	140.64	1	1	45.4864	45.5
DATA	2425	29	45	0	0	A_42_P465677	NM_001106241	7846.86	386.844	7.382073e+002	7.488278e+001	841.5	42	8.854920e+000	0	0	0	0	0	0	728.615	1	1	45.4864	42.525
DATA	2426	29	46	0	0	A_42_P781999	NM_001106378	7872.27	386.823	3.039553e+004	3.039579e+003	30147	42	7.479800e+000	0	0	0	0	0	0	30046.4	1	1	44.7812	42.8529
DATA	2427	29	47	0	0	A_44_P991472	NM_134374	7897.65	387.222	1.248490e+003	1.254762e+002	1324	44.5	9.390927e+000	0	0	0	0	0	0	1235.86	1	1	47.5395	45.9375
DATA	2428	29	48	0	0	A_42_P767737	AY724480	7923.06	387.232	1.255885e+004	1.255948e+003	12442.5	45	1.018247e+001	0	0	0	0	0	0	12446.6	1	1	46.5243	45.1176
DATA	2429	29	49	0	0	A_42_P648200	NM_001037356	7948.5	387.211	6.982549e+002	7.093601e+001	782	47	1.016530e+001	0	0	0	0	0	0	692.723	1	1	49.8279	46.8
DATA	2430	29	50	0	0	A_64_P006062	NM_001191695	7973.35	387.246	2.619673e+002	2.902282e+001	364.5	42	1.240472e+001	0	0	0	0	0	0	260.111	1	1	46.8651	45.6071
DATA	2431	29	51	0	0	A_42_P728230	NM_001037782	7999.18	387.333	4.602739e+003	4.604432e+002	4561	46.5	1.000358e+001	0	0	0	0	0	0	4573.38	1	1	47.5395	45.1563
DATA	2432	29	52	0	0	A_64_P106011	A_64_P106011	8024.5	387.5	1.252541e+001	1.247667e+001	98	45	1.138327e+001	0	0	0	0	0	0	-6.32828	0	0	57.5363	44.3103
DATA	2433	29	53	0	0	A_42_P622661	NM_001024292	8050.12	387	4.083547e+003	4.085452e+002	4158	45	9.335157e+000	0	0	0	0	0	0	4061.03	1	1	46.8651	45.125
DATA	2434	29	54	0	0	A_42_P619844	NM_001030037	8075.46	387.176	1.408931e+004	1.408986e+003	13947.5	43	9.293540e+000	0	0	0	0	0	0	14014.5	1	1	48.8603	44.3548
DATA	2436	29	56	0	0	A_64_P128260	XM_001056985	8126	387.545	1.633466e+003	1.638220e+002	1733.5	45	8.934684e+000	0	0	0	0	0	0	1624.68	1	1	55.8519	44.7714
DATA	2437	29	57	0	0	A_44_P1034950	NM_053294	8151.46	387.405	8.734990e+002	8.823615e+001	975	45.5	1.398393e+001	0	0	0	0	0	0	868.546	1	1	49.1849	44.9286
DATA	2438	29	58	0	0	A_64_P080316	NM_139113	8176.58	387.573	6.735014e+002	6.849663e+001	768.5	40	9.006320e+000	0	0	0	0	0	0	669.394	1	1	57.5363	43.3
DATA	2439	29	59	0	0	A_64_P053069	NM_001106820	8202.42	387.573	3.160876e+003	3.163342e+002	3158	41	1.204796e+001	0	0	0	0	0	0	3139.68	1	1	57.5363	42.8182
DATA	2440	29	60	0	0	A_42_P498066	NM_031136	8227.6	387.759	1.026033e+005	1.026033e+004	101480	41	1.152362e+001	0	0	0	0	0	0	101840	1	1	50.4627	42.9231
DATA	2441	29	61	0	0	A_44_P277068	ENSRNOT00000058491	8252.94	387.618	1.603476e+004	1.603525e+003	16026	42	9.942439e+000	0	0	0	0	0	0	15900.8	1	1	46.1809	43.0286
DATA	2442	29	62	0	0	A_44_P685613	XM_225679	8278.5	387.5	1.753166e+003	1.757632e+002	1843	39	9.823128e+000	0	0	0	0	0	0	1736.65	1	1	49.1849	40.4231
DATA	2443	29	63	0	0	A_64_P124364	ENSRNOT00000015807	8303.81	387.531	4.576205e+002	4.744825e+001	563	41	7.458420e+000	0	0	0	0	0	0	452.762	1	1	51.0895	41.2813
DATA	2444	29	64	0	0	A_42_P466362	NM_017142	8329.37	387.5	2.873805e+003	2.876546e+002	2885	45	9.350600e+000	0	0	0	0	0	0	2839.4	1	1	47.8731	45.9394
DATA	2445	29	65	0	0	A_64_P081517	ENSRNOT00000037639	8354.56	387.479	1.703987e+002	2.117621e+001	273.5	42.5	9.449142e+000	0	0	0	0	0	0	168.107	1	1	48.2044	42.0625
DATA	2446	29	66	0	0	A_42_P629394	NM_031683	8380.05	387.608	8.869837e+003	8.870731e+002	8422	36.5	6.990103e+000	0	0	0	0	0	0	8736.19	1	1	49.1849	36.3077
DATA	2447	29	67	0	0	A_44_P500975	NM_001000833	8405.27	387.73	6.225337e+001	1.406807e+001	163	37.5	8.777204e+000	0	0	0	0	0	0	61.2073	1	0	48.8603	37.8438
DATA	2448	29	68	0	0	A_64_P165046	ENSRNOT00000015927	8430.9	387.761	2.014030e+002	2.377824e+001	298	35.5	1.009280e+001	0	0	0	0	0	0	197.636	1	1	45.835	37.8824
DATA	2449	29	69	0	0	A_44_P222865	XM_235305	8456.37	387.488	1.576097e+004	1.576148e+003	15482.5	40	1.239090e+001	0	0	0	0	0	0	15434.1	1	1	52.3208	42.0345
DATA	2451	29	71	0	0	A_64_P131688	XM_574187	8507	387.797	8.213291e+001	1.514375e+001	185	43	7.521718e+000	0	0	0	0	0	0	80.0717	1	1	46.8651	41.9487
DATA	2452	29	72	0	0	A_42_P556457	NM_001033931	8532.64	387.742	4.030764e+003	4.032781e+002	3957	47	1.043662e+001	0	0	0	0	0	0	3919.96	1	1	46.1809	46
DATA	2453	29	73	0	0	A_42_P734384	NM_001108406	8558	387.797	9.843528e+003	9.844358e+002	9404	41	9.701023e+000	0	0	0	0	0	0	9548.62	1	1	46.8651	43.1212
DATA	2454	29	74	0	0	A_42_P728032	XM_001066058	8583	387.839	5.746294e+003	5.747724e+002	5792	41.5	1.001284e+001	0	0	0	0	0	0	5559.56	1	1	51.4001	44.4688
DATA	2455	29	75	0	0	A_64_P151525	A_64_P151525	8608.6	387.886	9.218970e+001	1.581996e+001	200.5	43	7.672986e+000	0	0	0	0	0	0	88.945	1	1	47.2035	43.2333
DATA	2456	29	76	0	0	A_43_P19276	ENSRNOT00000039523	8633.85	387.864	1.423493e+003	1.429320e+002	1464.5	40	9.785001e+000	0	0	0	0	0	0	1369.46	1	1	46.1809	40.2903
DATA	2457	29	77	0	0	A_44_P529811	NM_001107657	8659.3	387.857	2.854231e+001	1.324293e+001	136	44	1.074859e+001	0	0	0	0	0	0	27.377	1	0	47.2035	43.125
DATA	2458	29	78	0	0	A_64_P104640	A_64_P104640	8684.5	388	5.282376e+004	5.282392e+003	50837	41	1.004251e+001	0	0	0	0	0	0	50513	1	1	54.1152	41.2353
DATA	2459	29	79	0	0	A_64_P003234	NM_001109048	8710	387.803	4.002892e+001	1.361448e+001	149.5	40	9.571303e+000	0	0	0	0	0	0	38.1555	1	0	46.8651	39.7879
DATA	2460	29	80	0	0	A_64_P097158	NM_001000875	8735.5	388.352	1.310578e+001	1.305477e+001	100	42	8.803408e+000	0	0	0	0	0	0	-9.29682	0	0	57.5363	40
DATA	2461	29	81	0	0	A_64_P141814	NM_001134629	8760.84	387.635	6.594186e+002	6.723035e+001	734	44	1.041599e+001	0	0	0	0	0	0	624.405	1	1	44.7812	44.1471
DATA	2462	29	82	0	0	A_42_P463602	NM_001107592	8786.42	388.427	1.319487e+001	1.314352e+001	111	39.5	8.554261e+000	0	0	0	0	0	0	-0.833233	0	0	57.5363	39.8462
DATA	2463	29	83	0	0	A_64_P083366	NM_001077643	8811.71	388.106	2.752104e+004	2.752136e+003	26270	37	4.669140e+000	0	0	0	0	0	0	25880.9	1	1	45.835	36.9091
DATA	2464	29	84	0	0	A_44_P121039	NM_172008	8837.19	388.083	1.994018e+003	1.998406e+002	1968	43	9.593589e+000	0	0	0	0	0	0	1868.49	1	1	46.8651	43.4138
DATA	2465	29	85	66	1	DarkCorner	DarkCorner	8862.45	387.682	1.333728e+001	1.328537e+001	87	41	1.081891e+001	0	0	0	0	0	0	-27.7537	0	0	45.835	40.5854
DATA	2466	30	1	66	1	DarkCorner	DarkCorner	6741.72	393.896	1.541701e+001	1.535701e+001	88	39	7.920188e+000	0	0	0	0	0	0	-25.8654	0	0	45.835	39.9524
DATA	2467	30	2	0	0	A_42_P687443	NM_020100	6767.53	393.547	7.517948e+002	7.671193e+001	706.5	37	9.941305e+000	0	0	0	1	0	0	611.211	1	1	49.1849	39.2727
DATA	2468	30	3	0	0	A_42_P563382	ENSRNOT00000055321	6793.07	393.771	9.210446e+003	9.211693e+002	7719.5	44	9.385865e+000	0	0	0	0	0	0	7537.46	1	1	46.8651	44.4359
DATA	2469	30	4	0	0	A_42_P667100	NM_001013932	6818.11	393.676	2.580223e+003	2.584614e+002	2216	48	1.206195e+001	0	0	0	0	0	0	2125.02	1	1	48.8603	47.7429
DATA	2470	30	5	0	0	A_42_P553319	TC597248	6843.51	393.864	3.553900e+002	3.856074e+001	412	42.5	8.056436e+000	0	0	0	1	0	0	294.591	1	1	45.4864	42.1154
DATA	2471	30	6	0	0	A_64_P151358	NM_181695	6869.42	393.573	2.759602e+001	1.512102e+001	133	45.5	1.229194e+001	0	0	0	0	0	0	23.0236	1	0	57.5363	45.6176
DATA	2472	30	7	0	0	A_44_P196743	ENSRNOT00000007795	6895.04	393.929	1.482896e+001	1.477125e+001	101	44.5	9.374347e+000	0	0	0	0	0	0	-9.13686	0	0	46.8651	44.5
DATA	2474	30	9	0	0	A_64_P127111	NM_001106004	6945.37	394.265	1.363756e+004	1.363834e+003	11607	48	1.011678e+001	0	0	0	0	0	0	11595.5	1	1	46.5243	47.8571
DATA	2475	30	10	0	0	A_42_P470775	NM_001025126	6970.56	393.973	8.379887e+003	8.381142e+002	7094	42	1.130618e+001	0	0	0	0	0	0	7168.62	1	1	48.5334	44.9063
DATA	2476	30	11	0	0	A_44_P472855	NM_001000961	6996.09	393.614	1.631639e+002	2.176958e+001	248	44	1.011681e+001	0	0	0	0	0	0	140.433	1	1	57.259	43.2759
DATA	2477	30	12	0	0	A_64_P080682	NM_001109652	7020.99	394.118	1.438127e+001	1.433813e+001	112	42	9.266978e+000	0	0	0	0	0	0	5.25208	0	0	46.8651	42.8919
DATA	2478	30	13	0	0	A_42_P727368	NM_001025693	7046.55	393.91	2.950982e+002	3.276593e+001	364	40.5	6.892984e+000	0	0	0	0	0	0	257.045	1	1	49.5074	40.5714
DATA	2479	30	14	0	0	A_64_P034427	A_64_P034427	7072.5	394	5.281585e+003	5.283481e+002	4792.5	44	1.033885e+001	0	0	0	0	0	0	4628.3	1	1	54.1152	45.7407
DATA	2480	30	15	0	0	A_64_P042871	A_64_P042871	7097.36	393.719	1.562440e+003	1.568767e+002	1562	45	1.403542e+001	0	0	0	0	0	0	1376.91	1	1	44.7812	46.8
DATA	2481	30	16	0	0	A_64_P152617	NM_001105747	7122.85	393.959	3.665439e+001	1.446632e+001	138	42	9.573148e+000	0	0	0	0	0	0	32.4884	1	0	47.2035	41.6129
DATA	2482	30	17	0	0	A_44_P468879	NM_001007798	7148.12	394.095	9.171066e+001	1.666641e+001	189	38	7.617449e+000	0	0	0	0	0	0	81.743	1	1	47.5395	38.4054
DATA	2483	30	18	0	0	A_44_P252976	NM_001012071	7173.84	394.103	5.620581e+002	5.788445e+001	605	40	9.036325e+000	0	0	0	0	0	0	503.768	1	1	46.5243	41
DATA	2484	30	19	0	0	A_64_P014080	NM_022189	7198.89	394.169	1.381916e+001	1.376731e+001	112	42	9.939561e+000	0	0	0	0	0	0	2.08451	0	0	45.835	41.8889
DATA	2485	30	20	0	0	A_44_P204789	NM_001025684	7224.56	394.028	1.729038e+003	1.734451e+002	1651	44	1.126616e+001	0	0	0	0	0	0	1566.32	1	1	48.2044	44.0938
DATA	2486	30	21	0	0	A_64_P030373	NM_001127319	7250	394.319	1.123385e+002	1.765602e+001	211	38	6.626401e+000	0	0	0	0	0	0	102.298	1	1	58.0869	39.4333
DATA	2487	30	22	0	0	A_42_P558703	NM_001106810	7275.43	393.761	2.915848e+003	2.918996e+002	2714	42	6.356906e+000	0	0	0	0	0	0	2668.53	1	1	46.5243	41.5556
DATA	2488	30	23	0	0	A_44_P241190	NM_001013199	7300.91	393.672	1.651735e+003	1.657232e+002	1621.5	43	1.123885e+001	0	0	0	0	0	0	1519.11	1	1	45.1352	44.6129
DATA	2489	30	24	0	0	A_42_P539095	XM_001081794	7326	393.774	1.583486e+003	1.589165e+002	1578.5	40	7.586746e+000	0	0	0	0	0	0	1463.28	1	1	45.4864	41.0606
DATA	2490	30	25	0	0	A_64_P010905	ENSRNOT00000057216	7351.55	394.13	4.419718e+002	4.617205e+001	514	43	7.691154e+000	0	0	0	0	0	0	410.362	1	1	47.2035	43.3333
DATA	2491	30	26	0	0	A_44_P500660	NM_001007645	7376.99	394.229	6.380067e+002	6.517188e+001	699	43.5	1.254958e+001	0	0	0	0	0	0	595.081	1	1	46.8651	44.7778
DATA	2492	30	27	0	0	A_64_P056436	A_64_P056436	7402.42	394.427	4.513936e+002	4.704094e+001	528.5	42	8.347339e+000	0	0	0	0	0	0	422.892	1	1	57.5363	43.2963
DATA	2493	30	28	0	0	A_42_P773816	NM_017079	7427.67	394.247	6.755691e+003	6.756977e+002	6388	37.5	7.338765e+000	0	0	0	0	0	0	6355.92	1	1	48.2044	37.0667
DATA	2494	30	29	0	0	A_64_P138604	NM_001009967	7453	394.261	5.390394e+004	5.390410e+003	50886	44	1.192197e+001	0	0	0	0	0	0	50923.2	1	1	52.9257	46
DATA	2495	30	30	0	0	A_42_P705302	NM_001107361	7478.63	394.043	1.687756e+004	1.687807e+003	15643	50	1.353586e+001	0	0	0	0	0	0	16008.1	1	1	46.8651	50.4333
DATA	2496	30	31	0	0	A_64_P027259	NM_001191656	7503.85	393.967	2.570318e+004	2.570351e+003	24308	49	1.101026e+001	0	0	0	0	0	0	24472	1	1	45.1352	48.25
DATA	2497	30	32	0	0	A_44_P288333	ENSRNOT00000006659	7529	393.934	3.925348e+002	4.134398e+001	487	44.5	1.233898e+001	0	0	0	0	0	0	375.097	1	1	44.0646	45.8529
DATA	2498	30	33	0	0	A_42_P618217	NM_130752	7554.47	394.278	2.040627e+002	2.415998e+001	303	46	1.106044e+001	0	0	0	0	0	0	195.696	1	1	48.2044	46.6
DATA	2499	30	34	0	0	A_64_P151587	A_64_P151587	7580.11	394.5	1.294009e+001	1.290281e+001	113	47	1.019738e+001	0	0	0	0	0	0	5.58874	0	0	65	46.2059
DATA	2500	30	35	0	0	A_42_P771107	NM_001108217	7605.5	394.5	3.426105e+003	3.428514e+002	3299	47	8.940142e+000	0	0	0	0	0	0	3307.57	1	1	49.1849	46.6364
DATA	2501	30	36	0	0	A_42_P689013	NM_053800	7631	394.5	3.442293e+004	3.442317e+003	32786.5	48	9.199653e+000	0	0	0	0	0	0	33334.4	1	1	48.5334	47.3143
DATA	2502	30	37	0	0	A_64_P155334	NM_001100945	7656.54	394.254	4.880690e+003	4.882361e+002	4632	49	1.282927e+001	0	0	0	0	0	0	4740.11	1	1	47.5395	48.5135
DATA	2503	30	38	0	0	A_64_P049007	A_64_P049007	7681.79	394.537	6.193962e+001	1.416272e+001	169	41	9.398981e+000	0	0	0	0	0	0	60.3214	1	0	46.5243	41.2162
DATA	2504	30	39	0	0	A_44_P351461	ENSRNOT00000027179	7707.11	394.5	1.658694e+002	2.089283e+001	265	44	1.344285e+001	0	0	0	0	0	0	161.953	1	1	56.9804	44.8919
DATA	2505	30	40	0	0	A_44_P604267	NM_022933	7732.37	394.37	2.238583e+003	2.242168e+002	2285	42	9.907702e+000	0	0	0	0	0	0	2190.98	1	1	48.2044	43.3448
DATA	2506	30	41	0	0	A_64_P070475	XM_001061514	7757.44	394.301	1.269437e+001	1.264510e+001	107.5	40.5	9.725541e+000	0	0	0	0	0	0	0.577828	0	0	48.5334	41.8846
DATA	2507	30	42	0	0	A_64_P119963	A_64_P119963	7783	394.5	2.445906e+003	2.449159e+002	2552	42	6.566674e+000	0	0	0	0	0	0	2404.35	1	1	51.0895	40.9394
DATA	2508	30	43	0	0	A_42_P658562	NM_001134416	7808.86	394.592	1.047084e+003	1.054630e+002	1139	42.5	1.059311e+001	0	0	0	0	0	0	1031.33	1	1	47.5395	43.7059
DATA	2509	30	44	0	0	A_64_P116830	A_64_P116830	7834	394.545	7.201493e+001	1.448785e+001	178	44	1.265825e+001	0	0	0	0	0	0	71.0552	1	1	65	46.8298
DATA	2510	30	45	0	0	A_64_P048531	ENSRNOT00000019473	7859.42	394.573	2.082098e+002	2.431138e+001	308	42	7.312090e+000	0	0	0	0	0	0	205.765	1	1	57.5363	44
DATA	2511	30	46	0	0	A_64_P122716	NM_139331	7884.76	394.353	1.294028e+003	1.300084e+002	1360	43	9.888953e+000	0	0	0	0	0	0	1280.65	1	1	46.1809	44.4839
DATA	2512	30	47	0	0	A_64_P077323	NM_201992	7910.42	394.573	2.007408e+001	1.267702e+001	125	44	9.155032e+000	0	0	0	0	0	0	19.8923	1	0	57.5363	43.9412
DATA	2513	30	48	0	0	A_42_P569711	NM_001108977	7935.47	394.278	9.083671e+002	9.169324e+001	985.5	45	1.078344e+001	0	0	0	0	0	0	901.103	1	1	48.2044	43.75
DATA	2514	30	49	0	0	A_42_P474100	NM_001191820	7960.94	394.611	9.357083e+003	9.357917e+002	9245.5	45	1.193837e+001	0	0	0	0	0	0	9291.18	1	1	48.2044	45.8966
DATA	2515	30	50	0	0	A_64_P026404	A_64_P026404	7986.42	394.573	1.253084e+001	1.248231e+001	104	43	1.323339e+001	0	0	0	0	0	0	0.770103	0	0	57.5363	46.5484
DATA	2516	30	51	0	0	A_64_P026581	ENSRNOT00000029099	8011.8	394.761	1.941777e+004	1.941817e+003	19046.5	45	1.141843e+001	0	0	0	0	0	0	19307.8	1	1	46.8651	43.2258
DATA	2517	30	52	0	0	A_64_P043624	NM_133565	8037.07	394.598	1.039623e+004	1.039697e+003	10462	45	1.020942e+001	0	0	0	0	0	0	10341.8	1	1	51.0895	46.0323
DATA	2518	30	53	0	0	A_44_P417429	NM_001011983	8062.63	394.556	3.979239e+003	3.981191e+002	3948	45	1.182921e+001	0	0	0	0	0	0	3959.5	1	1	48.2044	47.1111
DATA	2519	30	54	0	0	A_64_P007574	ENSRNOT00000028681	8088	394.5	2.482487e+004	2.482518e+003	24436	42.5	9.221623e+000	0	0	0	0	0	0	24704.4	1	1	52.3208	43.8529
DATA	2520	30	55	0	0	A_42_P529690	NM_001173510	8113.25	394.627	3.317530e+004	3.317554e+003	33214	47	1.053289e+001	0	0	0	0	0	0	33013.1	1	1	46.1809	45.3684
DATA	2521	30	56	0	0	A_42_P505070	TC624062	8138.88	394.603	7.904146e+003	7.905129e+002	7818.5	43	9.601187e+000	0	0	0	0	0	0	7863.84	1	1	48.5334	42.129
DATA	2522	30	57	0	0	A_42_P504653	NM_017143	8164.09	394.935	6.288837e+001	1.396746e+001	164	41	1.148949e+001	0	0	0	0	0	0	62.5461	1	1	65	43.1429
DATA	2523	30	58	0	0	A_64_P017891	A_64_P017891	8189.34	394.877	1.586874e+001	1.257860e+001	118.5	40.5	1.060802e+001	0	0	0	0	0	0	15.7741	1	0	48.5334	43.3889
DATA	2524	30	59	0	0	A_42_P642724	NM_001107585	8215.23	394.913	8.231733e+003	8.232680e+002	8144.5	39	9.368675e+000	0	0	0	0	0	0	8177.01	1	1	46.5243	36.8148
DATA	2525	30	60	0	0	A_42_P780943	NM_001011906	8240.28	394.902	2.772909e+003	2.775723e+002	2765	42	1.049691e+001	0	0	0	0	0	0	2752.21	1	1	49.8279	42.4333
DATA	2526	30	61	0	0	A_44_P482325	NM_145669	8265.93	394.786	3.351306e+003	3.353640e+002	3303	39	7.773961e+000	0	0	0	0	0	0	3322.96	1	1	46.8651	39.7813
DATA	2527	30	62	0	0	A_42_P716750	NM_001024757	8291.11	394.943	1.657360e+003	1.662085e+002	1730	41	1.037534e+001	0	0	0	0	0	0	1641.51	1	1	46.8651	43.0909
DATA	2528	30	63	0	0	A_64_P009565	NM_001191823	8316.43	394.769	3.171954e+002	3.410824e+001	417	43	7.707363e+000	0	0	0	0	0	0	313.757	1	1	45.4864	43.1
DATA	2529	30	64	0	0	A_42_P495969	NM_012824	8341.81	394.988	4.562671e+003	4.564399e+002	4551	43	8.598516e+000	0	0	0	0	0	0	4506.85	1	1	49.1849	44.4688
DATA	2530	30	65	0	0	A_64_P154671	ENSRNOT00000024704	8367.31	394.687	5.080429e+002	5.233800e+001	594	38	7.196470e+000	0	0	0	0	0	0	501.028	1	1	45.835	37.4074
DATA	2531	30	66	0	0	A_44_P111337	NM_001108724	8392.6	394.949	7.136506e+003	7.137618e+002	6855.5	38	6.595003e+000	0	0	0	0	0	0	7026.12	1	1	49.1849	36.6957
DATA	2532	30	67	0	0	A_42_P665627	NM_023095	8417.94	394.97	9.206626e+001	1.562276e+001	195	37.5	8.243275e+000	0	0	0	0	0	0	90.4758	1	1	46.8651	38.1389
DATA	2533	30	68	0	0	A_44_P447585	NM_001166676	8443.5	395.352	2.033477e+001	1.280903e+001	126	39	9.768838e+000	0	0	0	0	0	0	19.9442	1	0	57.5363	38.7407
DATA	2534	30	69	0	0	A_42_P463754	NM_030994	8468.58	395.427	7.608277e+002	7.713099e+001	838	41	9.844350e+000	0	0	0	0	0	0	744.669	1	1	57.5363	41.7083
DATA	2535	30	70	0	0	A_42_P644717	NM_001108927	8494.42	395.427	5.664379e+001	1.390749e+001	164.5	41	8.439304e+000	0	0	0	0	0	0	55.3149	1	0	57.5363	40.8857
DATA	2536	30	71	0	0	A_42_P546539	NM_001135801	8519.78	394.815	2.343414e+003	2.346871e+002	2374.5	40.5	9.367901e+000	0	0	0	0	0	0	2282.96	1	1	45.4864	41
DATA	2537	30	72	0	0	A_42_P818297	XM_001073988	8545.42	394.803	3.300973e+003	3.303440e+002	3340.5	49	1.399322e+001	0	0	0	0	0	0	3207.77	1	1	46.1809	51.1143
DATA	2538	30	73	0	0	A_64_P047416	NM_001109501	8570.42	395.427	9.375654e+002	9.462574e+001	1000	39	9.089921e+000	0	0	0	0	0	0	908.811	1	1	57.5363	39.72
DATA	2539	30	74	0	0	A_43_P18389	XM_002726292	8595.58	395.427	1.288062e+001	1.288365e+001	119	43	9.191986e+000	0	0	0	0	0	0	11.3034	0	0	65	44.2759
DATA	2540	30	75	0	0	A_64_P044276	NM_001105946	8621.3	394.716	1.168965e+004	1.169036e+003	11318.5	41	8.060844e+000	0	0	0	0	0	0	11268.1	1	1	46.1809	41.1481
DATA	2541	30	76	0	0	A_64_P059475	ENSRNOT00000029976	8646.5	395.5	1.295469e+001	1.290427e+001	104	40	9.607245e+000	0	0	0	0	0	0	-3.32275	0	0	65	39.3714
DATA	2542	30	77	0	0	A_64_P005496	A_64_P005496	8671.89	395.5	1.299378e+001	1.294321e+001	106.5	39.5	1.015822e+001	0	0	0	0	0	0	-4.19046	0	0	56.9804	40.8125
DATA	2544	30	79	0	0	A_42_P739860	NM_133578	8723.13	395.3	4.479717e+003	4.481611e+002	4255.5	39	8.984092e+000	0	0	0	0	0	0	4265.7	1	1	47.2035	39.2059
DATA	2545	30	80	0	0	A_42_P681251	NM_030844	8748.14	395.188	6.137854e+003	6.139245e+002	5916	42.5	8.802893e+000	0	0	0	1	0	0	5825.69	1	1	45.4864	42.1563
DATA	2546	30	81	0	0	A_42_P567793	NM_001107668	8773.53	395.278	4.850136e+003	4.851909e+002	4506	38	1.097364e+001	0	0	0	0	0	0	4588.05	1	1	48.2044	40.9412
DATA	2547	30	82	0	0	A_64_P041662	NM_182843	8798.93	395.353	1.897224e+003	1.901780e+002	1900	39	8.020451e+000	0	0	0	0	0	0	1788.56	1	1	46.1809	38.5926
DATA	2548	30	83	0	0	A_42_P534679	NM_001134974	8824.39	395.423	5.505394e+003	5.506977e+002	5248	37	4.005573e+000	0	0	0	0	0	0	5171.88	1	1	47.8731	36.2692
DATA	2549	30	84	66	1	DarkCorner	DarkCorner	8849.58	395.573	1.330196e+001	1.325019e+001	81	43	1.126287e+001	0	0	0	0	0	0	-33.1131	0	0	65	42.069
DATA	2550	30	85	66	1	DarkCorner	DarkCorner	8875.38	395.061	1.335178e+001	1.329982e+001	89	38	1.006217e+001	0	0	0	0	0	0	-24.8635	0	0	45.4864	38.2338
DATA	2551	31	1	66	1	DarkCorner	DarkCorner	6729.21	400.806	1.544654e+001	1.538642e+001	93	36	8.260030e+000	0	0	0	0	0	0	-19.9378	0	0	47.5395	36.631
DATA	2552	31	2	0	0	A_42_P576549	NM_001106490	6754.72	401.183	1.534513e+001	1.528541e+001	112	37	1.130571e+001	0	0	0	0	0	0	-2.27872	0	0	47.2035	39.3824
DATA	2553	31	3	0	0	A_42_P542638	NM_001012202	6780.23	401.116	1.951131e+003	1.957032e+002	1699	41	9.271975e+000	0	0	0	0	0	0	1593.6	1	1	46.5243	41.9268
DATA	2554	31	4	0	0	A_42_P765736	NM_001025670	6805.5	401	1.797352e+002	2.346798e+001	265	45	1.108613e+001	0	0	0	0	0	0	147.742	1	1	48.5334	46.4688
DATA	2555	31	5	0	0	A_44_P372461	NM_001170708	6831	401	2.293875e+003	2.298769e+002	1965	46	1.525854e+001	0	0	0	0	0	0	1897.76	1	1	51.4001	47.7333
DATA	2556	31	6	0	0	A_64_P070554	XM_001059856	6856.09	401.093	3.943047e+001	1.541110e+001	141.5	46	1.050192e+001	0	0	0	0	0	0	32.8286	1	0	47.5395	45.0968
DATA	2557	31	7	0	0	A_64_P030859	ENSRNOT00000045252	6881.91	401.104	2.688847e+004	2.688888e+003	22576	46.5	1.163975e+001	0	0	0	0	0	0	22531.4	1	1	46.8651	47.25
DATA	2558	31	8	0	0	A_64_P079260	NM_001005546	6907.2	400.859	5.301187e+002	5.501501e+001	535	44	1.051698e+001	0	0	0	0	0	0	446.995	1	1	45.4864	45.6176
DATA	2559	31	9	0	0	A_64_P149846	A_64_P149846	6932.52	401.362	3.733041e+004	3.733070e+003	31970.5	49	9.577230e+000	0	0	0	0	0	0	31676.1	1	1	47.5395	50.16
DATA	2560	31	10	0	0	A_64_P120624	NM_031634	6958	401.455	1.458395e+001	1.456327e+001	116.5	48.5	1.041663e+001	0	0	0	0	0	0	8.74801	0	0	55.8519	48.8846
DATA	2561	31	11	0	0	A_64_P158020	NM_001008909	6983.42	401.427	1.224219e+002	1.892992e+001	209	43	9.440604e+000	0	0	0	0	0	0	105.169	1	1	57.5363	44.1875
DATA	2562	31	12	0	0	A_64_P116606	NM_153724	7008.58	401.427	2.831218e+002	3.174217e+001	356	44	9.431414e+000	0	0	0	0	0	0	244.685	1	1	57.5363	43.5185
DATA	2563	31	13	0	0	A_44_P532436	ENSRNOT00000006946	7034.06	401.232	6.145840e+001	1.553425e+001	165	41.5	7.720678e+000	0	0	0	0	0	0	53.4326	1	0	46.5243	42.4375
DATA	2564	31	14	0	0	A_64_P027545	NM_023095	7059.37	401.045	2.926229e+002	3.251853e+001	365	41	8.229753e+000	0	0	0	0	0	0	255.903	1	1	45.835	41.8929
DATA	2565	31	15	0	0	A_64_P076705	NM_017088	7084.6	401.291	1.105995e+005	1.105996e+004	96434	42	1.368635e+001	0	0	0	0	0	0	97284.2	1	1	50.4627	46.1667
DATA	2566	31	16	0	0	A_44_P238642	NM_001127201	7110.26	401.264	7.882206e+003	7.883453e+002	6861	39.5	9.316220e+000	0	0	0	0	0	0	6973.44	1	1	47.5395	38.6333
DATA	2567	31	17	0	0	A_64_P037249	NM_001105802	7135.63	401.36	1.885690e+002	2.345091e+001	278	42	1.073867e+001	0	0	0	0	0	0	167.77	1	1	48.8603	42.3704
DATA	2568	31	18	0	0	A_64_P061524	NM_172064	7161.33	401.5	1.650446e+002	2.155437e+001	258	39	1.236822e+001	0	0	0	0	0	0	147.667	1	1	57.5363	43
DATA	2569	31	19	0	0	A_42_P536564	NM_001008344	7186.37	401.36	7.083375e+003	7.084717e+002	6428.5	42	1.199076e+001	0	0	0	0	0	0	6371.43	1	1	48.8603	45.2759
DATA	2570	31	20	0	0	A_64_P062433	NM_001135804	7211.94	401.618	2.757718e+003	2.761126e+002	2530	42.5	7.521743e+000	0	0	0	0	0	0	2493.93	1	1	46.1809	41.9375
DATA	2571	31	21	0	0	A_42_P665509	NM_053777	7237.42	401.427	5.217040e+004	5.217057e+003	47100.5	39.5	1.214136e+001	0	0	0	1	0	0	47425.8	1	1	57.5363	43.0333
DATA	2572	31	22	0	0	A_44_P250144	NM_001001373	7262.58	401.427	1.362904e+001	1.358758e+001	115	40	6.025965e+000	0	0	0	0	0	0	5.12528	0	0	57.5363	40.3043
DATA	2573	31	23	0	0	A_42_P746838	NM_001024286	7288.11	401.5	5.516471e+001	1.459127e+001	157	41	5.184289e+000	0	0	0	0	0	0	50.6539	1	0	56.9804	41.3448
DATA	2574	31	24	0	0	A_44_P210852	NM_001034187	7313.46	401.386	4.185068e+002	4.395682e+001	502	40.5	7.844250e+000	0	0	0	0	0	0	386.143	1	1	47.5395	42.125
DATA	2575	31	25	0	0	A_64_P019390	A_64_P019390	7338.7	401.671	4.949813e+001	1.426624e+001	152	41	6.550503e+000	0	0	0	0	0	0	45.8864	1	0	47.5395	41
DATA	2576	31	26	0	0	A_64_P134709	NM_001105760	7364.31	401.662	3.261659e+002	3.523094e+001	406.5	40.5	1.096499e+001	0	0	0	0	0	0	303.768	1	1	48.5334	42.9
DATA	2578	31	28	0	0	A_64_P028117	NM_001000372	7415.11	401.5	7.871800e+001	1.537090e+001	180.5	39	1.112383e+001	0	0	0	0	0	0	73.9568	1	1	65	42.7143
DATA	2579	31	29	0	0	A_44_P391517	NM_001034144	7440.5	401.5	6.143240e+002	6.282348e+001	684.5	40	1.139700e+001	0	0	0	0	0	0	579.582	1	1	57.5363	40.9655
DATA	2580	31	30	0	0	A_42_P743682	NM_133599	7465.67	401.5	1.006050e+002	1.651323e+001	202	50	1.164289e+001	0	0	0	0	0	0	95.2956	1	1	65	49.9032
DATA	2581	31	31	0	0	A_64_P163075	NM_001109321	7491.42	401.573	6.339303e+001	1.450209e+001	169.5	48.5	1.122403e+001	0	0	0	0	0	0	60.2852	1	0	57.5363	47.8571
DATA	2582	31	32	0	0	A_44_P393422	NM_001013188	7516.63	401.444	3.178017e+003	3.180673e+002	2996.5	44.5	8.861331e+000	0	0	0	0	0	0	3033.43	1	1	48.2044	44.8438
DATA	2583	31	33	0	0	A_44_P288982	NM_001107913	7542.52	401.873	6.314133e+002	6.445504e+001	710.5	43	7.314272e+000	0	0	0	0	0	0	604.918	1	1	50.4627	44.037
DATA	2584	31	34	0	0	A_64_P009788	NM_001191099	7567.42	401.573	4.371367e+001	1.362406e+001	147	46.5	7.684063e+000	0	0	0	0	0	0	42.0198	1	0	57.5363	46.3
DATA	2585	31	35	0	0	A_42_P764228	NM_031707	7592.58	401.573	7.947681e+003	7.948722e+002	7726	48	1.140159e+001	0	0	0	0	0	0	7664.64	1	1	57.5363	46.3939
DATA	2586	31	36	0	0	A_64_P161621	NM_001101015	7618.42	401.573	4.122940e+002	4.317682e+001	503	47	7.844759e+000	0	0	0	0	0	0	398.88	1	1	57.5363	46.0976
DATA	2587	31	37	0	0	A_42_P763522	NM_001013980	7644	401.729	8.797456e+003	8.798384e+002	8674	49	1.041194e+001	0	0	0	0	0	0	8536.86	1	1	46.8651	48.9429
DATA	2588	31	38	0	0	A_64_P029935	NM_001109299	7669	401.722	6.095261e+002	6.227123e+001	704	43	1.007234e+001	0	0	0	0	0	0	593.111	1	1	47.8731	44.2162
DATA	2589	31	39	0	0	A_64_P045053	A_64_P045053	7694.16	401.882	2.690045e+002	2.975337e+001	379	43	1.075979e+001	0	0	0	0	0	0	262.453	1	1	46.5243	43.8571
DATA	2590	31	40	0	0	A_42_P540920	NM_001135045	7720	401.729	9.281442e+003	9.282309e+002	9016	44	1.181680e+001	0	0	0	0	0	0	9078.31	1	1	46.8651	46.8667
DATA	2591	31	41	0	0	A_64_P055323	NM_001191930	7745.41	401.958	5.143479e+002	5.296790e+001	610.5	42	1.067592e+001	0	0	0	0	0	0	504.274	1	1	48.2044	44.2414
DATA	2592	31	42	0	0	A_64_P047162	NM_153472	7770.49	401.873	5.820031e+003	5.821400e+002	5724.5	40	6.565254e+000	0	0	0	0	0	0	5718.24	1	1	47.8731	40.2222
DATA	2593	31	43	0	0	A_64_P279594	NM_001170476	7795.91	401.935	1.264839e+001	1.263488e+001	114	42	9.299004e+000	0	0	0	0	0	0	9.34717	0	0	65	43.2059
DATA	2594	31	44	0	0	A_42_P665509	NM_053777	7821.15	401.905	5.155054e+004	5.155069e+003	50839	44	1.363016e+001	0	0	0	0	0	0	50843.7	1	1	47.8731	47.4615
DATA	2595	31	45	0	0	A_64_P106638	NM_001108198	7847	401.797	2.555031e+004	2.555062e+003	25003	44	1.033526e+001	0	0	0	0	0	0	25242.8	1	1	46.8651	46.7955
DATA	2596	31	46	0	0	A_64_P141245	NM_001105920	7872	402	1.039919e+003	1.047448e+002	1136	43	8.677623e+000	0	0	0	0	0	0	1028.94	1	1	54.9904	44.3636
DATA	2597	31	47	0	0	A_42_P503739	FQ231471	7897.39	401.732	3.051900e+004	3.051925e+003	29777.5	45	9.207519e+000	0	0	0	0	0	0	30237.1	1	1	47.5395	43.8182
DATA	2598	31	48	0	0	A_44_P282433	NM_033230	7922.91	401.896	1.978091e+003	1.982039e+002	2077	41	8.415935e+000	0	0	0	0	0	0	1962.16	1	1	46.8651	41.8065
DATA	2599	31	49	0	0	A_42_P585750	NM_001202463	7948.39	401.853	9.816029e+001	1.588704e+001	199	45	1.123157e+001	0	0	0	0	0	0	97.4685	1	1	48.8603	43.0741
DATA	2600	31	50	0	0	A_42_P523517	FQ229104	7973.76	402	1.888098e+004	1.888139e+003	18935	41.5	1.251027e+001	0	0	0	0	0	0	18764	1	1	46.8651	44.1
DATA	2601	31	51	0	0	A_64_P126190	NM_001113789	7999.09	402.386	7.590792e+001	1.460061e+001	176	43	9.940955e+000	0	0	0	0	0	0	75.4907	1	1	57.259	42.875
DATA	2602	31	52	0	0	A_42_P549675	NM_080577	8024.54	402.176	9.232788e+003	9.233630e+002	9284	43	9.087981e+000	0	0	0	0	0	0	9186.7	1	1	48.8603	43.5161
DATA	2603	31	53	0	0	A_42_P535644	NM_024400	8049.91	401.672	2.612500e+003	2.615470e+002	2706	45	1.001326e+001	0	0	0	0	0	0	2600.31	1	1	45.1352	46.7105
DATA	2604	31	54	0	0	A_64_P050233	XM_345239	8075.42	402.427	3.168837e+002	3.404963e+001	428	45	1.154179e+001	0	0	0	0	0	0	315.48	1	1	57.5363	46.7097
DATA	2605	31	55	0	0	A_64_P121575	NM_001013144	8100.3	401.681	9.066822e+001	1.540893e+001	192.5	47	9.228757e+000	0	0	0	0	0	0	90.2655	1	1	46.8651	44.2069
DATA	2606	31	56	0	0	A_64_P018263	NM_012728	8125.83	401.677	3.722888e+002	3.925884e+001	476.5	44.5	8.446470e+000	0	0	0	0	0	0	370.588	1	1	45.4864	44.1667
DATA	2607	31	57	0	0	A_64_P164682	TC600307	8151.62	402.304	2.090316e+004	2.090353e+003	20535	43	1.053484e+001	0	0	0	0	0	0	20802.4	1	1	53.2255	42.871
DATA	2608	31	58	0	0	A_44_P1045612	NM_172317	8177	402.271	8.772181e+002	8.860363e+001	975	41	1.036301e+001	0	0	0	0	0	0	872.598	1	1	46.8651	44.5
DATA	2609	31	59	0	0	A_42_P529514	NM_001008308	8202.42	402.427	2.775064e+003	2.777867e+002	2844	39.5	7.917899e+000	0	0	0	0	0	0	2758.81	1	1	57.5363	38.7857
DATA	2610	31	60	0	0	A_44_P870348	NM_001107522	8227.58	402.427	2.775645e+002	3.043556e+001	366	39.5	9.399733e+000	0	0	0	0	0	0	275.733	1	1	57.5363	39.4545
DATA	2611	31	61	0	0	A_64_P108264	XM_223835	8253	402.455	8.054293e+001	1.486799e+001	183	41	9.001587e+000	0	0	0	0	0	0	79.939	1	1	55.8519	41.0286
DATA	2612	31	62	0	0	A_42_P754784	CB328432	8278.38	402	1.069215e+004	1.069288e+003	10572	42	7.926748e+000	0	0	0	0	0	0	10600.5	1	1	48.5334	42.1667
DATA	2613	31	63	0	0	A_64_P084525	NM_001101001	8304	402.271	4.400172e+003	4.401955e+002	4339	44	1.061765e+001	0	0	0	0	0	0	4357.23	1	1	46.8651	44.1714
DATA	2614	31	64	0	0	A_64_P378583	NM_001099516	8329.24	402.462	1.259162e+001	1.254437e+001	104	44	8.896855e+000	0	0	0	0	0	0	2.0737	0	0	50.7771	45.5333
DATA	2615	31	65	0	0	A_64_P154172	NM_001000557	8354.64	402.014	1.261077e+001	1.256169e+001	95	41	7.798933e+000	0	0	0	0	0	0	-7.86068	0	0	46.8651	39.8519
DATA	2616	31	66	0	0	A_64_P074634	NM_001024287	8379.89	402.5	1.411888e+002	1.891142e+001	241	38	7.755224e+000	0	0	0	0	0	0	139.191	1	1	56.9804	38.0882
DATA	2617	31	67	1028	1	(+)E1A_r60_a22	E1A_r60_a22	8405.31	402.052	1.656540e+002	2.081542e+001	267	38	6.493477e+000	0	0	0	0	0	0	163.017	1	1	49.1849	38.3704
DATA	2618	31	68	0	0	A_43_P12780	NM_053350	8430.93	402.493	2.390990e+002	2.703988e+001	333	37	9.676404e+000	0	0	0	0	0	0	234.849	1	1	48.5334	38.9412
DATA	2619	31	69	0	0	A_44_P442169	NM_001013034	8456.56	402.028	1.003415e+004	1.003495e+003	9854	35	8.280302e+000	0	0	0	0	0	0	9835.25	1	1	48.2044	36.9583
DATA	2620	31	70	0	0	A_64_P093894	A_64_P093894	8481.48	401.938	5.357913e+001	1.376691e+001	155	41.5	9.204607e+000	0	0	0	0	0	0	52.4054	1	0	44.0646	41.2813
DATA	2621	31	71	0	0	A_64_P073378	NM_001025287	8507.07	402.425	3.219205e+003	3.221713e+002	3188.5	38.5	8.977143e+000	0	0	0	0	0	0	3141.55	1	1	48.5334	39.775
DATA	2622	31	72	0	0	A_64_P096076	A_64_P096076	8532.42	402.573	1.279053e+001	1.274075e+001	102.5	46	1.139918e+001	0	0	0	0	0	0	-2.74989	0	0	57.5363	44.3
DATA	2623	31	73	0	0	A_42_P471835	TC610276	8558	402.5	1.755182e+004	1.755228e+003	16946.5	41.5	1.347834e+001	0	0	0	0	0	0	17044	1	1	48.5334	44.7
DATA	2624	31	74	0	0	A_42_P767737	AY724480	8583.19	402.481	1.235668e+004	1.235735e+003	11788	40	9.078747e+000	0	0	0	0	0	0	11967.9	1	1	49.8279	41.0968
DATA	2625	31	75	0	0	A_64_P016393	A_64_P016393	8608.42	402.409	1.500067e+004	1.500122e+003	14539	46	9.124365e+000	0	0	0	0	0	0	14489	1	1	52.9257	45.8125
DATA	2626	31	76	0	0	A_42_P803752	XM_580093	8633.59	402.52	4.694764e+001	1.370698e+001	151	41	9.310186e+000	0	0	0	0	0	0	45.2189	1	0	49.5074	40.2903
DATA	2627	31	77	0	0	A_42_P589025	NM_134363	8659.42	402.573	8.109319e+004	8.109329e+003	78135	43	9.029372e+000	0	0	0	0	0	0	77873.6	1	1	57.5363	41.3793
DATA	2628	31	78	0	0	A_64_P107938	NM_001000930	8684.79	402.513	1.300658e+001	1.295596e+001	106.5	37	8.333254e+000	0	0	0	0	0	0	-1.07476	0	0	49.8279	39.0357
DATA	2629	31	79	0	0	A_64_P088817	A_64_P088817	8710.11	402.352	9.289045e+002	9.379525e+001	1002.5	39.5	1.026065e+001	0	0	0	0	0	0	886.522	1	1	47.8731	39.4474
DATA	2630	31	80	0	0	A_64_P000579	A_64_P000579	8735.5	402.5	4.510733e+004	4.510752e+003	43102.5	41	8.891691e+000	0	0	0	0	0	0	42911.4	1	1	52.9257	40.6071
DATA	2631	31	81	0	0	A_44_P570046	TC630334	8760.96	402.792	6.699568e+002	6.826084e+001	736	46.5	9.949672e+000	0	0	0	0	0	0	635.251	1	1	46.8651	44.8125
DATA	2632	31	82	0	0	A_44_P431629	NM_001106835	8786.38	402.919	6.980890e+002	7.103212e+001	759.5	43	1.166307e+001	0	0	0	0	0	0	659.7	1	1	49.1849	44.875
DATA	2634	31	84	0	0	A_42_P485932	NM_001034927	8837.08	402.583	2.802459e+004	2.802490e+003	26376	39	8.255508e+000	0	0	0	0	0	0	26299.1	1	1	54.9904	40.1818
DATA	2635	31	85	66	1	DarkCorner	DarkCorner	8862.16	402.416	1.331630e+001	1.326448e+001	86	42	1.067197e+001	0	0	0	0	0	0	-26.6366	0	0	50.1463	41.9787
DATA	2636	32	1	66	1	DarkCorner	DarkCorner	6742.42	408.427	1.537275e+001	1.531292e+001	86	40	9.474480e+000	0	0	0	0	0	0	-25.5085	0	0	57.5363	40.1081
DATA	2637	32	2	0	0	A_64_P048366	ENSRNOT00000059330	6767.46	408.618	3.853852e+003	3.856854e+002	3296	37	9.599065e+000	0	0	0	0	0	0	3141.71	1	1	47.2035	39.7273
DATA	2638	32	3	0	0	A_44_P1058980	NM_001012036	6792.84	408.709	5.264210e+003	5.266380e+002	4405	47.5	9.715803e+000	0	0	0	0	0	0	4319.2	1	1	50.1463	46.9444
DATA	2639	32	4	0	0	A_64_P062562	ENSRNOT00000027655	6818.15	408.681	4.743580e+001	1.575260e+001	151	46	1.162210e+001	0	0	0	0	0	0	39.1694	1	0	46.5243	46.1842
DATA	2640	32	5	0	0	A_44_P490100	ENSRNOT00000043641	6843.58	408.427	7.908643e+001	1.689216e+001	177	43	9.250766e+000	0	0	0	0	0	0	65.72	1	1	57.5363	41.92
DATA	2641	32	6	0	0	A_42_P473886	NM_001165922	6869.33	408.5	6.635861e+002	6.799568e+001	657	45	1.116745e+001	0	0	0	0	0	0	554.996	1	1	57.5363	45.6129
DATA	2642	32	7	0	0	A_64_P393339	ENSRNOT00000057753	6894.17	408.739	5.894971e+001	1.587416e+001	160.5	43	8.597440e+000	0	0	0	0	0	0	49.6095	1	0	46.1809	42.7143
DATA	2643	32	8	0	0	A_44_P461154	NM_053819	6919.89	408.5	2.154590e+003	2.159563e+002	1880	46	1.119837e+001	0	0	0	0	0	0	1824.64	1	1	56.9804	45.8182
DATA	2644	32	9	0	0	A_42_P701991	NM_001100671	6945.15	408.587	1.021828e+004	1.021932e+003	8746	48	1.067028e+001	0	0	0	0	0	0	8707.04	1	1	48.8603	48.9545
DATA	2645	32	10	1028	1	(+)E1A_r60_1	E1A_r60_1	6970.24	408.693	1.452498e+001	1.446845e+001	102	44	1.165250e+001	0	0	0	0	0	0	-8.01482	0	0	49.1849	44.931
DATA	2646	32	11	0	0	A_44_P541230	ENSRNOT00000010675	6996.07	408.732	6.741326e+003	6.742859e+002	5854	45	9.175787e+000	0	0	0	0	0	0	5815.07	1	1	47.5395	44.1515
DATA	2647	32	12	0	0	A_64_P004593	NM_001166761	7021.29	409.116	2.180727e+001	1.445878e+001	127	40.5	1.045037e+001	0	0	0	0	0	0	18.9242	1	0	46.1809	42.3929
DATA	2648	32	13	0	0	A_64_P018385	ENSRNOT00000063845	7046.54	408.493	1.426640e+001	1.421183e+001	112	44	1.160906e+001	0	0	0	0	0	0	1.43434	0	0	48.2044	43.9375
DATA	2649	32	14	0	0	A_64_P017590	NM_001000096	7072.42	408.573	1.418173e+001	1.418101e+001	122.5	44	9.505220e+000	0	0	0	0	0	0	10.9041	0	0	57.5363	44.8571
DATA	2650	32	15	0	0	A_42_P810118	XM_001075984	7097.76	408.55	2.054172e+003	2.058968e+002	1897.5	39	1.558060e+001	0	0	0	0	0	0	1814.01	1	1	50.7771	42.2963
DATA	2651	32	16	0	0	A_42_P772157	NM_017020	7122.71	408.575	1.215826e+003	1.223823e+002	1157	42	8.998632e+000	0	0	0	0	0	0	1079.66	1	1	48.5334	43.2414
DATA	2652	32	17	0	0	A_42_P542809	NM_021671	7148.42	408.573	1.570880e+003	1.577009e+002	1463	42	1.039366e+001	0	0	0	0	0	0	1402.82	1	1	57.5363	42.6875
DATA	2653	32	18	0	0	A_42_P645352	NM_001126371	7173.7	408.567	1.328924e+004	1.328996e+003	11818	40	9.175939e+000	0	0	0	0	0	0	11932	1	1	53.2255	39.7419
DATA	2654	32	19	0	0	A_64_P106933	NM_001130493	7199.42	408.573	5.589922e+001	1.483353e+001	159	42	1.005436e+001	0	0	0	0	0	0	50.4629	1	0	57.5363	45.5135
DATA	2655	32	20	0	0	A_42_P614175	NM_033237	7224.58	408.573	1.304747e+003	1.311887e+002	1275.5	43	8.969232e+000	0	0	0	0	0	0	1183.99	1	1	57.5363	42.9667
DATA	2656	32	21	0	0	A_64_P147190	NM_031840	7249.96	408.878	6.840982e+003	6.842334e+002	6406	40	1.266515e+001	0	0	0	0	0	0	6239.9	1	1	46.8651	43.9643
DATA	2657	32	22	0	0	A_43_P11268	NM_031762	7275.57	408.608	9.398160e+003	9.399134e+002	8568	42	9.654618e+000	0	0	0	0	0	0	8615.5	1	1	49.1849	43.7857
DATA	2658	32	23	0	0	A_64_P022215	A_64_P022215	7300.51	408.63	3.244404e+002	3.512750e+001	410	40	6.625951e+000	0	0	0	0	0	0	298.853	1	1	48.5334	42.3548
DATA	2659	32	24	0	0	A_64_P001080	NM_001109379	7326.05	408.667	2.138304e+002	2.523550e+001	305	39.5	6.840124e+000	0	0	0	0	0	0	197.912	1	1	49.1849	41.1111
DATA	2660	32	25	0	0	A_42_P468662	NM_001108886	7351.63	409	4.971340e+003	4.973129e+002	4632	42.5	7.518865e+000	0	0	0	0	0	0	4622.93	1	1	48.5334	43.4667
DATA	2661	32	26	0	0	A_42_P522285	NM_001044263	7377.24	409.235	1.189524e+003	1.196911e+002	1190	40	1.144826e+001	0	0	0	0	0	0	1111.21	1	1	46.1809	42.2963
DATA	2662	32	27	0	0	A_42_P478500	NM_177421	7402.5	409	1.365311e+005	1.365312e+004	127821	42	9.966395e+000	0	0	0	0	0	0	128095	1	1	54.1152	42.9355
DATA	2663	32	28	0	0	A_42_P739860	NM_133578	7428.07	409	4.486324e+003	4.488255e+002	4211	37	9.185367e+000	0	0	0	0	0	0	4227.06	1	1	46.8651	38.375
DATA	2664	32	29	0	0	A_42_P708614	NM_001130505	7453.39	408.931	6.954462e+004	6.954474e+003	65886	50	1.214022e+001	0	0	0	0	0	0	65792.7	1	1	53.8203	48.4194
DATA	2665	32	30	0	0	A_64_P067000	NM_001108721	7478.52	408.916	3.111766e+003	3.114506e+002	3041	42	1.081983e+001	0	0	0	0	0	0	2955.39	1	1	49.8279	44.5714
DATA	2666	32	31	0	0	A_44_P590748	NM_001109199	7504	409	3.362706e+002	3.605615e+001	430	44	9.445941e+000	0	0	0	0	0	0	320.594	1	1	46.8651	44.25
DATA	2667	32	32	0	0	A_42_P742797	NM_001106761	7529.5	409	5.351209e+003	5.352779e+002	5101.5	41.5	7.577556e+000	0	0	0	0	0	0	5120.47	1	1	48.5334	42.75
DATA	2668	32	33	0	0	A_42_P761277	NM_001008297	7554.55	408.945	2.899167e+003	2.902044e+002	2791	48	8.995740e+000	0	0	0	1	0	0	2783.74	1	1	48.5334	48.56
DATA	2669	32	34	0	0	A_42_P503739	FQ231471	7580	409.203	3.055598e+004	3.055625e+003	28997	44.5	1.015485e+001	0	0	0	0	0	0	29438.7	1	1	46.8651	45.5263
DATA	2670	32	35	0	0	A_42_P635760	ENSRNOT00000023806	7605.21	409.101	2.318343e+004	2.318379e+003	22386.5	47.5	1.093069e+001	0	0	0	0	0	0	22406.5	1	1	51.7088	47.0789
DATA	2671	32	36	0	0	A_64_P136337	ENSRNOT00000064588	7632.02	409.558	9.599103e+003	9.599955e+002	9413.5	49	9.561972e+000	0	0	0	0	0	0	9307.55	1	1	36.9964	48.5778
DATA	2672	32	37	0	0	A_64_P128316	ENSRNOT00000062007	7656.42	409.427	3.655538e+001	1.327050e+001	145	45	1.219858e+001	0	0	0	0	0	0	35.5428	1	0	57.5363	46.0313
DATA	2673	32	38	0	0	A_64_P050799	A_64_P050799	7681.5	409.352	2.343350e+002	2.666460e+001	331.5	45.5	8.636930e+000	0	0	0	0	0	0	228.456	1	1	57.5363	44.8214
DATA	2674	32	39	0	0	A_42_P701779	NM_001108048	7707.31	408.843	4.109293e+003	4.111252e+002	3962	46	1.155182e+001	0	0	0	0	0	0	4016.5	1	1	47.2035	45.3889
DATA	2675	32	40	0	0	A_42_P604900	NM_199117	7732.71	408.833	8.143901e+003	8.144885e+002	7873	44	8.710799e+000	0	0	0	0	0	0	7979.13	1	1	45.835	44.8438
DATA	2676	32	41	0	0	A_44_P1060444	NM_001106644	7758	408.774	6.460759e+003	6.461994e+002	6408	42.5	8.043230e+000	0	0	0	0	0	0	6344.15	1	1	45.4864	43.125
DATA	2677	32	42	0	0	A_64_P090339	NM_001000756	7783.22	408.917	7.371998e+001	1.460296e+001	179	42	8.676050e+000	0	0	0	0	0	0	72.5395	1	1	44.7812	43.0769
DATA	2678	32	43	0	0	A_42_P770556	NM_033096	7808.7	409.1	1.620997e+004	1.621046e+003	15903.5	42	1.200806e+001	0	0	0	0	0	0	15981.3	1	1	47.2035	43.5
DATA	2679	32	44	0	0	A_44_P606502	NM_001130502	7834	409.455	8.719681e+001	1.528929e+001	189	44	1.346506e+001	0	0	0	0	0	0	86.1184	1	1	65	47.7619
DATA	2680	32	45	0	0	A_64_P372189	NM_212516	7859.42	409.427	6.058305e+004	6.058318e+003	59772	44	1.095085e+001	0	0	0	0	0	0	59928.6	1	1	57.5363	47.2759
DATA	2681	32	46	0	0	A_42_P540518	NM_199399	7884.91	409.104	6.508867e+003	6.510072e+002	6416	44	7.050223e+000	0	0	0	0	0	0	6447.6	1	1	46.8651	42.8125
DATA	2682	32	47	0	0	A_64_P158955	ENSRNOT00000020260	7910.33	409.5	3.503096e+001	1.298695e+001	139	42	7.763119e+000	0	0	0	0	0	0	34.7457	1	0	57.5363	42.1379
[truncated: 6,340,870 more chars]
