# Supplementary material for: Gene Expression in the Hippocampus in a Rat Model of Premenstrual Dysphoric Disorder After Treatment With Baixiangdan Capsules
Source: Front Psychol. 2018 Nov 13;9:2065. doi: 10.3389/fpsyg.2018.02065 (PMC6242977; doi:10.3389/fpsyg.2018.02065)
Supplement: Supplementary file 2 [file Data_Sheet_2.ZIP › Raw Data Files/24_14.txt]

TYPE	text	text	text	integer	text	float	float	text	integer	text	text	integer	integer	integer	integer	float	float	float	float	float	float	text	text	text	text	text	text	text	text	text	text	text	integer	integer	integer	text	integer	boolean
FEPARAMS	Protocol_Name	Protocol_date	Scan_ScannerName	Scan_NumChannels	Scan_Date	Scan_MicronsPerPixelX	Scan_MicronsPerPixelY	Scan_OriginalGUID	Scan_NumScanPass	Grid_Name	Grid_Date	Grid_NumSubGridRows	Grid_NumSubGridCols	Grid_NumRows	Grid_NumCols	Grid_RowSpacing	Grid_ColSpacing	Grid_OffsetX	Grid_OffsetY	Grid_NomSpotWidth	Grid_NomSpotHeight	Grid_GenomicBuild	FeatureExtractor_Barcode	FeatureExtractor_Sample	FeatureExtractor_ScanFileName	FeatureExtractor_ArrayName	FeatureExtractor_ScanFileGUID	FeatureExtractor_DesignFileName	FeatureExtractor_ExtractionTime	FeatureExtractor_UserName	FeatureExtractor_ComputerName	FeatureExtractor_Version	FeatureExtractor_IsXDRExtraction	FeatureExtractor_ColorMode	FeatureExtractor_QCReportType	DyeNorm_NormFilename	DyeNorm_NormNumProbes	Grid_IsGridFile
DATA	GE1_1100_Jul11 (Read Only)	1-Jul-2011 22:30	Agilent Technologies Scanner G2505C US10450393	1	07-11-2013 11:36:06	5	5	2b0edc4a-cb3a-4eca-830e-566ae8841b18	1	028282_D_F_20120224	24-Feb-2012 00:00	1	1	532	85	73.3235	63.5	0	36.6617	65	65	rn4:RGSCv3.4:Nov2004	1_1		M:\2013.07.11 Rat GE 1-color 4x44k(sunpeng)\\US10450393_S01.tif	US10450393_S01	6030c60e-d494-4e84-bafe-d546c781a172	028282_D_F_20120224.xml	11-Jul-2013 15:17:26	admin	KCSY01	11.0.1.1	0	0	0		0	0
*
TYPE	float	float	float	integer	integer	float	float	float	integer	float	float	float	integer	float	float	integer	integer	integer	integer	integer	float	float	float	integer	float	float	float	float	float	integer	integer	float	float	float	float	float	integer	float	float	float	float	integer	float	float	float	float	float	integer	float	float	float	float	float	float	float	integer	float	integer	float	float	float	float	integer	float	float	float	float	text	float	float	float	float	float	float	float	float	float	float	float	float	float	float	float	float	float	float	float	float	float	integer	integer	integer	integer	float	integer	text	integer	text	float	float	float	integer	boolean	float	float	boolean	float	boolean	float	boolean	float	boolean	float	boolean	float	boolean	float	boolean	float	boolean	float	boolean	float	boolean	float	boolean
STATS	gDarkOffsetAverage	gDarkOffsetMedian	gDarkOffsetStdDev	gDarkOffsetNumPts	gSaturationValue	gAvgSig2BkgeQC	gAvgSig2BkgNegCtrl	gRatioSig2BkgeQC_NegCtrl	gNumSatFeat	gLocalBGInlierNetAve	gLocalBGInlierAve	gLocalBGInlierSDev	gLocalBGInlierNum	gGlobalBGInlierAve	gGlobalBGInlierSDev	gGlobalBGInlierNum	gNumFeatureNonUnifOL	gNumPopnOL	gNumNonUnifBGOL	gNumPopnBGOL	gOffsetUsed	gGlobalFeatInlierAve	gGlobalFeatInlierSDev	gGlobalFeatInlierNum	AnyColorPrcntFeatNonUnifOL	AnyColorPrcntBGNonUnifOL	AnyColorPrcntFeatPopnOL	AnyColorPrcntBGPopnOL	TotalPrcntFeatOL	gNumNegBGSubFeat	gNonCtrlNumNegFeatBGSubSig	gSpatialDetrendRMSFit	gSpatialDetrendRMSFilteredMinusFit	gSpatialDetrendSurfaceArea	gSpatialDetrendVolume	gSpatialDetrendAveFit	gNonCtrlNumSatFeat	gNonCtrl99PrcntNetSig	gNonCtrl50PrcntNetSig	gNonCtrl1PrcntNetSig	gNonCtrlMedPrcntCVBGSubSig	gCtrleQCNumSatFeat	gCtrleQC99PrcntNetSig	gCtrleQC50PrcntNetSig	gCtrleQC1PrcntNetSig	geQCMedPrcntCVBGSubSig	geQCSig2BkgLow2	gNegCtrlNumInliers	gNegCtrlAveNetSig	gNegCtrlSDevNetSig	gNegCtrlAveBGSubSig	gNegCtrlSDevBGSubSig	gAveNumPixOLLo	gAveNumPixOLHi	gPixCVofHighSignalFeat	gNumHighSignalFeat	AddErrorEstimateGreen	TotalNumFeatures	ROIHeight	ROIWidth	CentroidDiffX	CentroidDiffY	NumFoundFeat	MaxNonUnifEdges	MaxSpotNotFoundEdges	gMultDetrendRMSFit	gMultDetrendSurfaceAverage	eQCLowSigName2	eQCOneColorLogLowSignal	eQCOneColorLogLowSignalError	eQCOneColorLogHighSignal	eQCOneColorLinFitLogLowConc	eQCOneColorLinFitLogLowSignal	eQCOneColorLinFitLogHighConc	eQCOneColorLinFitLogHighSignal	eQCOneColorLinFitSlope	eQCOneColorLinFitIntercept	eQCOneColorLinFitRSQ	eQCOneColorSpikeDetectionLimit	gNonCtrl50PrcntBGSubSig	gCtrleQC50PrcntBGSubSig	gMedPrcntCVProcSignal	geQCMedPrcntCVProcSignal	gOutlierFlagger_Auto_FeatB_Term	gOutlierFlagger_Auto_FeatC_Term	gOutlierFlagger_Auto_BgndB_Term	gOutlierFlagger_Auto_BgndC_Term	OutlierFlagger_FeatChiSq	OutlierFlagger_BgndChiSq	GriddingStatus	IsGoodGrid	NumGeneNonUnifOL	TotalNumberOfReplicatedGenes	gPercentileIntensityProcessedSignal	ExtractionStatus	QCMetricResults	gNonCtrlNumWellAboveBG	ImageDepth	AFHold	gPMTVolts	GlassThickness	gDDN	GridHasBeenOptimized	gNegCtrlSpread	Metric_IsGoodGrid	Metric_IsGoodGrid_IsInRange	Metric_AnyColorPrcntFeatNonUnifOL	Metric_AnyColorPrcntFeatNonUnifOL_IsInRange	Metric_gNegCtrlAveNetSig	Metric_gNegCtrlAveNetSig_IsInRange	Metric_gNegCtrlAveBGSubSig	Metric_gNegCtrlAveBGSubSig_IsInRange	Metric_gNegCtrlSDevBGSubSig	Metric_gNegCtrlSDevBGSubSig_IsInRange	Metric_gSpatialDetrendRMSFilteredMinusFit	Metric_gSpatialDetrendRMSFilteredMinusFit_IsInRange	Metric_gNonCntrlMedCVProcSignal	Metric_gNonCntrlMedCVProcSignal_IsInRange	Metric_gE1aMedCVProcSignal	Metric_gE1aMedCVProcSignal_IsInRange	Metric_absGE1E1aSlope	Metric_absGE1E1aSlope_IsInRange	Metric_DetectionLimit	Metric_DetectionLimit_IsInRange	Metric_gDDN	Metric_gDDN_IsInRange
DATA	7.82249	7.82249	1.82201	0	778132	1.44002	1.69085	0.851653	0	32.0094	39.8319	6.22588	43877	39.8319	6.22588	43877	24	555	224	346	7.82249	3842.43	11150.7	43682	0.0542324	0.506169	1.25412	0.78185	0.0443128	687	254	3.9324	3.13449	1.00865	10.8983	66.2689	0	56655	399.996	59.2713	8.24099	0	179.453	74.9984	51.8108	-1	1.57419	153	52.5707	5.21892	-5.88607	3.49799	0.656031	0.688842	0.122728	6069	3.13449	44254	4.3319	7.61806	0.728595	0.853941	41904	0	0.0864662	0.068872	1.00069	(+)E1A_r60_3	0	0	0	0	0	0	0	0	0	0	-1	340.547	15.732	3.38393	-1	1131.82	103.33	104.419	58.8057	1.94663	2.51752	0	1	16	30367	2641.05	1	ExtractionEvaluate	39144	20 Bit	0	354	976.117	1	0	10.5144	1	1	0.0542324	1	52.5707	0	-5.88607	1	3.49799	1	3.13449	1	3.38393	1	-1	0	0	0	-1	0	1	1
*
TYPE	integer	integer	integer	integer	integer	text	text	float	float	float	float	float	float	float	boolean	boolean	boolean	boolean	boolean	boolean	float	boolean	boolean	float	float
FEATURES	FeatureNum	Row	Col	SubTypeMask	ControlType	ProbeName	SystematicName	PositionX	PositionY	gProcessedSignal	gProcessedSigError	gMedianSignal	gBGMedianSignal	gBGPixSDev	gIsSaturated	gIsFeatNonUnifOL	gIsBGNonUnifOL	gIsFeatPopnOL	gIsBGPopnOL	IsManualFlag	gBGSubSignal	gIsPosAndSignif	gIsWellAboveBG	SpotExtentX	gBGMeanSignal
DATA	1	1	1	260	1	GE_BrightCorner	GE_BrightCorner	441.856	185.093	4.086699e+004	4.086700e+003	34941	29	7.465301e+000	0	0	0	0	0	0	35624.9	1	1	52.9257	29.3205
DATA	2	1	2	66	1	DarkCorner	DarkCorner	467.392	185.069	1.566930e+001	3.891414e+000	72.5	29	7.714343e+000	0	0	0	1	0	0	13.7887	1	0	53.8203	29.9461
DATA	3	1	3	66	1	DarkCorner	DarkCorner	492.5	185	1.468196e+001	3.823841e+000	74	28	7.132733e+000	0	0	0	1	0	0	13.0342	1	0	54.1152	28.5872
DATA	4	1	4	66	1	DarkCorner	DarkCorner	518.232	185.11	8.446558e+000	3.600957e+000	67	27	6.901082e+000	0	0	0	0	0	0	7.56341	1	0	50.4627	27.4479
DATA	5	1	5	66	1	DarkCorner	DarkCorner	544.739	184.761	8.303582e+001	9.000034e+000	131.5	29	8.036387e+000	0	0	0	1	0	0	74.9754	1	1	38.2652	29.7883
DATA	6	1	6	66	1	DarkCorner	DarkCorner	568.931	184.548	7.794957e+000	3.533622e+000	68	29	7.395133e+000	0	0	0	0	0	0	7.08913	1	0	47.5395	29.7126
DATA	7	1	7	66	1	DarkCorner	DarkCorner	594.429	185.057	5.429488e+000	3.464452e+000	67	30	7.416957e+000	0	0	0	0	0	0	4.97383	1	0	47.8731	29.7157
DATA	8	1	8	66	1	DarkCorner	DarkCorner	619.529	185.195	4.025323e+000	3.422628e+000	63.5	27	7.386979e+000	0	0	0	0	0	0	3.71221	1	0	51.7088	28.2381
DATA	9	1	9	66	1	DarkCorner	DarkCorner	645	185.455	3.388456e+000	3.392467e+000	63.5	27	6.999198e+000	0	0	0	0	0	0	2.97365	0	0	55.8519	27.802
DATA	10	1	10	66	1	DarkCorner	DarkCorner	670.81	185.114	4.338969e+000	3.385201e+000	63	28	7.131748e+000	0	0	0	0	0	0	4.05103	1	0	49.8279	28.4873
DATA	11	1	11	66	1	DarkCorner	DarkCorner	696.092	184.947	1.150290e+001	3.531663e+000	70	30	8.538751e+000	0	0	0	1	0	0	10.7981	1	0	47.8731	31.0228
DATA	12	1	12	0	0	A_64_P076162	A_64_P076162	721.139	185.443	8.993690e+001	9.587676e+000	143	29	7.516733e+000	0	0	0	0	0	0	84.8551	1	1	50.1463	29.3088
DATA	13	1	13	0	0	A_64_P002176	NM_001170551	746.6	185.329	5.736799e+002	5.746321e+001	610	28	6.923675e+000	0	0	0	0	0	0	543.801	1	1	52.0157	28.1092
DATA	14	1	14	0	0	A_42_P664913	NM_001108400	771.859	185	6.048632e+002	6.057588e+001	635	28	6.951532e+000	0	0	0	0	0	0	575.785	1	1	46.8651	28.1599
DATA	15	1	15	0	0	A_43_P13320	NM_138880	797.352	185.07	2.725611e+001	4.264601e+000	86	27	7.104109e+000	0	0	0	0	0	0	26.0476	1	1	47.5395	28.1605
DATA	16	1	16	0	0	A_64_P126523	A_64_P126523	823.029	185.176	3.826850e+001	5.032533e+000	98	28	6.869254e+000	0	0	0	0	0	0	36.702	1	1	46.8651	28.1913
DATA	17	1	17	0	0	A_64_P038045	XM_002730109	848.107	185.5	6.288908e+001	7.082754e+000	121	28.5	7.456932e+000	0	0	0	0	0	0	60.5036	1	1	56.9804	29.0185
DATA	18	1	18	0	0	A_43_P11804	NM_017066	873.375	185.477	1.740047e+004	1.740050e+003	16466	29	7.977625e+000	0	0	0	0	0	0	16786.4	1	1	52.9257	29.501
DATA	19	1	19	0	0	A_44_P808710	XM_001069205	898.667	185.5	3.594926e+001	4.840468e+000	96	28	7.199354e+000	0	0	0	0	0	0	34.7636	1	1	57.5363	28.0039
DATA	20	1	20	0	0	A_64_P142111	NM_001100887	924.311	185.662	7.144093e+002	7.151413e+001	771	28	7.652692e+000	0	0	0	0	0	0	692.282	1	1	48.5334	28.0039
DATA	21	1	21	0	0	A_64_P095642	A_64_P095642	949.689	185.338	1.679550e+002	1.710315e+001	226	28	7.597326e+000	0	0	0	0	0	0	163.021	1	1	48.5334	27.8947
DATA	22	1	22	0	0	A_42_P735279	NM_001004446	975.058	185.299	2.393672e+004	2.393674e+003	23118	27	7.395207e+000	0	0	0	0	0	0	23264.4	1	1	52.9257	28.1822
DATA	23	1	23	0	0	A_44_P902822	XM_001063709	1000.51	185.37	4.284689e+001	5.360847e+000	99	28	7.486595e+000	0	0	0	0	0	0	41.6855	1	1	51.0895	28.5246
DATA	24	1	24	0	0	A_42_P563843	NM_022263	1026.21	185.628	1.070327e+001	3.392816e+000	70	29	7.247938e+000	0	0	0	0	0	0	10.4204	1	0	50.1463	28.908
DATA	25	1	25	0	0	A_42_P610788	NM_031544	1051.14	185.405	8.590359e+003	8.590419e+002	8342.5	30	7.826944e+000	0	0	0	0	0	0	8365.94	1	1	50.1463	29.9678
DATA	26	1	26	0	0	A_44_P242429	NM_001134842	1076.27	185.418	2.762573e+003	2.762760e+002	2602	29	7.715652e+000	0	0	0	0	0	0	2690.47	1	1	50.7771	29.3472
DATA	27	1	27	0	0	A_64_P020571	NM_001031659	1101.42	185.346	3.735238e+002	3.749087e+001	400.5	29	8.068973e+000	0	0	0	0	0	0	363.671	1	1	50.1463	29.2466
DATA	28	1	28	0	0	A_42_P518462	NM_001007020	1127.38	185.295	6.804516e+003	6.804592e+002	6462	33	8.193591e+000	0	0	0	0	0	0	6621.01	1	1	50.4627	33.1972
DATA	29	1	29	0	0	A_42_P469751	XM_001054007	1152.63	185	2.012461e+003	2.012720e+002	1994.5	31	7.741076e+000	0	0	0	0	0	0	1956.4	1	1	48.5334	31.4902
DATA	30	1	30	0	0	A_44_P209459	NM_022387	1177.94	185.232	8.486110e+003	8.486171e+002	8034.5	29	7.753474e+000	0	0	0	0	0	0	8240.3	1	1	46.5243	29.1915
DATA	31	1	31	0	0	A_64_P018547	NM_001108717	1203.32	185.625	9.767394e+002	9.772742e+001	945	29	8.732273e+000	0	0	0	0	0	0	947.117	1	1	48.2044	30.152
DATA	32	1	32	0	0	A_64_P111513	A_64_P111513	1229.2	185.307	3.517005e+001	4.780814e+000	93	28	7.467415e+000	0	0	0	0	0	0	34.0422	1	1	49.1849	28.9177
DATA	33	1	33	0	0	A_42_P493925	NM_198785	1254.26	185.5	5.805793e+002	5.814852e+001	591.5	30	7.921690e+000	0	0	0	0	0	0	560.87	1	1	49.1849	30.6275
DATA	34	1	34	0	0	A_64_P049828	NM_012543	1279.74	185.5	1.478307e+003	1.478664e+002	1470.5	30	8.536482e+000	0	0	0	0	0	0	1424.91	1	1	50.4627	30.332
DATA	35	1	35	0	0	A_64_P137927	NM_001191885	1305.33	185.5	2.437186e+002	2.458894e+001	285	31	9.341159e+000	0	0	0	0	0	0	234.325	1	1	57.5363	32.1258
DATA	36	1	36	0	0	A_43_P19848	NM_001106018	1330.5	185.5	7.039107e+001	7.761143e+000	130	30	8.519616e+000	0	0	0	0	0	0	67.4948	1	1	57.5363	30.2967
DATA	37	1	37	0	0	A_44_P308673	NM_139108	1355.95	185.523	2.749088e+002	2.768571e+001	328	29	7.635364e+000	0	0	0	0	0	0	262.816	1	1	55.8519	29.6092
DATA	38	1	38	0	0	A_64_P004269	NM_001191660	1381.44	185.397	2.249733e+003	2.249974e+002	2128.5	30	8.394866e+000	0	0	0	0	0	0	2143.87	1	1	50.1463	30.4731
DATA	39	1	39	0	0	A_42_P543670	NM_012572	1406.63	185.36	1.960186e+002	1.987777e+001	245	28	7.419223e+000	0	0	0	0	0	0	186.164	1	1	48.8603	28.7683
DATA	40	1	40	0	0	A_64_P164696	TC605704	1432.58	185.101	1.334401e+001	3.571377e+000	73	27.5	7.308027e+000	0	0	0	0	0	0	12.6261	1	0	50.1463	27.9288
DATA	41	1	41	0	0	A_64_P055763	NM_001191822	1457.38	185.556	1.121325e+004	1.121330e+003	10153.5	27	7.609341e+000	0	0	0	0	0	0	10571.3	1	1	48.2044	28.065
DATA	42	1	42	0	0	A_64_P068622	NM_001013056	1482.61	185.594	1.386830e+003	1.387232e+002	1337.5	28	7.396772e+000	0	0	0	0	0	0	1302.28	1	1	47.5395	28.6462
DATA	43	1	43	0	0	A_44_P915877	XM_001065403	1508.42	185.573	2.545763e+002	2.567738e+001	299	27	7.797250e+000	0	0	0	0	0	0	238.045	1	1	57.5363	27.9301
DATA	44	1	44	0	0	A_42_P647599	NM_024129	1533.66	185.816	8.471562e+002	8.478248e+001	805	28	7.896209e+000	0	0	0	0	0	0	788.769	1	1	49.5074	29.2149
DATA	45	1	45	0	0	A_42_P798776	XM_002725203	1558.99	185.391	5.891142e+003	5.891239e+002	5320	30	8.460387e+000	0	0	0	0	0	0	5460.25	1	1	46.8651	30.6272
DATA	46	1	46	0	0	A_42_P781735	NM_053319	1584.5	185.648	8.471718e+004	8.471719e+003	78156.5	30	8.558138e+000	0	0	0	0	0	0	78158.7	1	1	57.5363	30.7287
DATA	47	1	47	0	0	A_42_P553611	TC630296	1609.88	185.735	5.903893e+003	5.903992e+002	5313.5	29	9.282392e+000	0	0	0	0	0	0	5420.96	1	1	45.835	30.8723
DATA	48	1	48	0	0	A_43_P12729	NM_032615	1635.42	185.573	4.158879e+003	4.159021e+002	3698	28	8.930585e+000	0	0	0	0	0	0	3799.79	1	1	57.5363	30.1636
DATA	49	1	49	0	0	A_42_P507072	FQ213070	1660.44	185.74	4.857408e+003	4.857530e+002	4334	28	8.483881e+000	0	0	0	0	0	0	4416.2	1	1	49.5074	28.6157
DATA	50	1	50	0	0	A_42_P645467	NM_001108804	1686.09	185.614	4.193646e+001	5.440349e+000	98	28	7.511025e+000	0	0	0	0	0	0	37.9292	1	1	57.259	28.416
DATA	51	1	51	0	0	A_42_P738431	NM_019175	1711.43	185.605	1.568236e+003	1.568623e+002	1393.5	28	7.590142e+000	0	0	0	0	0	0	1410.99	1	1	49.5074	28.6575
DATA	52	1	52	0	0	A_42_P712297	NM_001135583	1736.75	185.763	2.236574e+003	2.236848e+002	2001.5	29	8.148056e+000	0	0	0	0	0	0	2001.72	1	1	49.1849	30.0199
DATA	53	1	53	0	0	A_42_P657538	NM_001008362	1761.91	185.896	4.433399e+003	4.433539e+002	3836	29	7.425503e+000	0	0	0	0	0	0	3946.79	1	1	46.8651	29.3933
DATA	54	1	54	0	0	A_42_P515405	NM_212505	1787.5	186	5.016610e+002	5.029087e+001	494.5	29	7.539564e+000	0	0	0	0	0	0	444.154	1	1	54.1152	29.2342
DATA	55	1	55	0	0	A_64_P089886	NM_053476	1812.93	185.721	2.907137e+003	2.907355e+002	2526	28	7.046742e+000	0	0	0	0	0	0	2559.56	1	1	45.835	28.4399
DATA	56	1	56	0	0	A_42_P528580	NM_001107528	1838.21	185.806	5.724200e+003	5.724312e+002	4847	27	7.212493e+000	0	0	0	0	0	0	5012.02	1	1	47.5395	27.4119
DATA	57	1	57	0	0	A_43_P14285	NM_001034145	1863.65	185.88	1.294505e+004	1.294510e+003	11044	26	6.847480e+000	0	0	0	0	0	0	11271.2	1	1	48.8603	26.953
DATA	58	1	58	0	0	A_42_P616287	NM_001134555	1889	185.987	2.665508e+002	2.689979e+001	286	28	7.343353e+000	0	0	0	0	0	0	230.79	1	1	46.8651	28.4008
DATA	59	1	59	0	0	A_42_P496411	NM_001109410	1914.38	186	4.284126e+003	4.284280e+002	3634	28	7.958444e+000	0	0	0	0	0	0	3688.52	1	1	48.5334	29.0613
DATA	60	1	60	0	0	A_44_P494310	NM_001009604	1939.63	186.042	5.459654e+003	5.459777e+002	4424	28	8.201578e+000	0	0	0	0	0	0	4674.38	1	1	48.2044	29.475
DATA	61	1	61	0	0	A_42_P645142	NM_019375	1965.35	185.88	5.860327e+002	5.871884e+001	543	28	7.640160e+000	0	0	0	1	0	0	498.873	1	1	48.8603	28.9157
DATA	62	1	62	0	0	A_64_P042132	AABR03024196	1990.91	185.896	1.052710e+004	1.052716e+003	8925	28	7.513412e+000	0	0	0	0	0	0	8911	1	1	46.8651	29.0135
DATA	63	1	63	0	0	A_42_P508085	NM_001009620	2015.85	185.903	3.565554e+003	3.565748e+002	2923	28	7.968562e+000	0	0	0	0	0	0	3001.71	1	1	46.8651	29
DATA	64	1	64	0	0	A_64_P051159	NM_001100684	2041.5	186	1.283290e+003	1.283836e+002	1157	31	8.919862e+000	0	0	0	0	0	0	1074.36	1	1	54.1152	31.5842
DATA	65	1	65	0	0	A_64_P124041	ENSRNOT00000019667	2067	186	2.679426e+002	2.705744e+001	270	28	8.404473e+000	0	0	0	0	0	0	223.091	1	1	54.9904	28.9317
DATA	66	1	66	0	0	A_64_P131122	XR_086302	2092.5	186	1.154609e+002	1.215070e+001	151	27	7.194051e+000	0	0	0	0	0	0	95.614	1	1	54.1152	27.5131
DATA	67	1	67	0	0	A_64_P021601	NM_031737	2117.5	186	1.868484e+002	1.906833e+001	208	27	6.855564e+000	0	0	0	0	0	0	153.923	1	1	54.1152	27.166
DATA	68	1	68	0	0	A_44_P776423	NM_001017386	2142.93	186.2	8.753490e+003	8.753573e+002	6854.5	27	7.062673e+000	0	0	0	0	0	0	7173.69	1	1	46.8651	27.5692
DATA	69	1	69	0	0	A_64_P120445	NM_080694	2168.38	185.816	5.345139e+001	6.584284e+000	102	27	7.173828e+000	0	0	0	0	0	0	43.5768	1	1	48.8603	27.7091
DATA	70	1	70	0	0	A_42_P772878	NM_001011936	2193.65	185.88	3.310802e+003	3.311027e+002	2601	27	7.018139e+000	0	0	0	0	0	0	2685.81	1	1	48.8603	27.8605
DATA	71	1	71	0	0	A_42_P736315	NM_001108321	2219.3	185.9	3.070224e+003	3.070470e+002	2415	28	7.610069e+000	0	0	0	0	0	0	2478.46	1	1	47.2035	28.7685
DATA	73	1	73	0	0	A_64_P041004	NM_001108599	2270.14	186.192	2.864086e+004	2.864088e+003	22332.5	26	7.093997e+000	0	0	0	0	0	0	22908.4	1	1	47.5395	26.7578
DATA	74	1	74	0	0	A_42_P494276	NM_001109663	2295.41	186.098	9.352531e+002	9.360810e+001	785.5	26	6.712624e+000	0	0	0	0	0	0	744.784	1	1	49.8279	26.2868
DATA	75	1	75	66	1	DarkCorner	DarkCorner	2321.06	186.065	5.358728e+000	3.989031e+000	61	25	6.778590e+000	0	0	0	0	0	0	4.24928	1	0	47.8731	25.3109
DATA	76	1	76	66	1	DarkCorner	DarkCorner	2346.54	185.962	5.137112e+000	4.001995e+000	62	25	6.849539e+000	0	0	0	0	0	0	4.05711	1	0	49.8279	25.4401
DATA	77	1	77	66	1	DarkCorner	DarkCorner	2371.68	185.947	3.996993e+000	3.997892e+000	59.5	25	6.746629e+000	0	0	0	0	0	0	2.63519	0	0	49.1849	25.9807
DATA	78	1	78	66	1	DarkCorner	DarkCorner	2397.09	186.386	6.117296e+000	4.044181e+000	62	26	6.296982e+000	0	0	0	0	0	0	4.79647	1	0	57.259	26.4073
DATA	79	1	79	66	1	DarkCorner	DarkCorner	2422.5	186.352	8.363333e+000	4.097291e+000	63	26	7.060533e+000	0	0	0	0	0	0	6.53568	1	0	57.5363	26.818
DATA	80	1	80	66	1	DarkCorner	DarkCorner	2448.14	186.229	8.587525e+000	4.114256e+000	63	26	7.061461e+000	0	0	0	0	0	0	6.68985	1	0	46.5243	26.4875
DATA	81	1	81	66	1	DarkCorner	DarkCorner	2473.42	186.427	5.468478e+000	4.071586e+000	61	27	7.358238e+000	0	0	0	0	0	0	4.24837	1	0	57.5363	27.1735
DATA	82	1	82	66	1	DarkCorner	DarkCorner	2498.82	186.338	1.518050e+001	4.320483e+000	68	28	6.979518e+000	0	0	0	0	0	0	11.7634	1	0	47.5395	27.8083
DATA	83	1	83	66	1	DarkCorner	DarkCorner	2524.12	186.512	1.111878e+001	4.203559e+000	66	27	7.060697e+000	0	0	0	0	0	0	8.5972	1	0	51.7088	27.2156
DATA	84	1	84	260	1	GE_BrightCorner	GE_BrightCorner	2549.42	186.427	5.510772e+004	5.510773e+003	41954.5	27	7.122176e+000	0	0	0	0	0	0	42527.4	1	1	57.5363	27.3618
DATA	85	1	85	260	1	GE_BrightCorner	GE_BrightCorner	2574.58	186.427	5.394622e+004	5.394624e+003	40755	27	7.689984e+000	0	0	0	0	0	0	41564.9	1	1	57.5363	27.8265
DATA	86	2	1	260	1	GE_BrightCorner	GE_BrightCorner	454.618	192.763	4.490709e+004	4.490710e+003	38776.5	30	7.969142e+000	0	0	0	0	0	0	39380.1	1	1	49.1849	30.1202
DATA	87	2	2	66	1	DarkCorner	DarkCorner	479.744	192.453	1.097945e+001	3.708728e+000	72	29	7.958575e+000	0	0	0	0	0	0	9.71493	1	0	52.0157	30.1206
DATA	88	2	3	66	1	DarkCorner	DarkCorner	505.512	192.581	6.600204e+000	3.572886e+000	68	28	6.719018e+000	0	0	0	0	0	0	5.89175	1	0	52.9257	28.6
DATA	89	2	4	66	1	DarkCorner	DarkCorner	530.926	192.173	4.852638e+000	3.516460e+000	66	28	7.332679e+000	0	0	0	0	0	0	4.36731	1	0	50.7771	28.6959
DATA	90	2	5	66	1	DarkCorner	DarkCorner	556.297	191.781	3.467425e+000	3.456321e+000	61	28	7.604113e+000	0	0	0	0	0	0	0.418844	0	0	45.1352	29.0913
DATA	91	2	6	66	1	DarkCorner	DarkCorner	581.418	192.573	3.441917e+000	3.447586e+000	64.5	30	7.180483e+000	0	0	0	0	0	0	3.12406	0	0	57.5363	30.3789
DATA	92	2	7	66	1	DarkCorner	DarkCorner	606.582	192.573	3.418361e+000	3.407110e+000	56	29	8.399831e+000	0	0	0	0	0	0	-3.20887	0	0	57.5363	29.3763
DATA	93	2	8	66	1	DarkCorner	DarkCorner	632.595	192.459	3.395711e+000	3.385410e+000	63.5	28	7.269500e+000	0	0	0	0	0	0	0.713076	0	0	49.1849	28.3382
DATA	94	2	9	66	1	DarkCorner	DarkCorner	657.582	192.573	3.375394e+000	3.364285e+000	57	27	6.324849e+000	0	0	0	0	0	0	-2.3506	0	0	57.5363	27.4231
DATA	95	2	10	66	1	DarkCorner	DarkCorner	683.398	192.241	3.356126e+000	3.351435e+000	62	30.5	9.903219e+000	0	0	0	0	0	0	1.93301	0	0	51.4001	32.6
DATA	96	2	11	0	0	A_44_P212746	ENSRNOT00000049707	708.418	192.573	4.012609e+001	5.212892e+000	100	29	7.175893e+000	0	0	0	0	0	0	37.7969	1	1	57.5363	29.3081
DATA	97	2	12	0	0	A_64_P103615	NM_001107179	733.582	192.573	9.878069e+001	1.041841e+001	161.5	29	7.055054e+000	0	0	0	0	0	0	93.4966	1	1	57.5363	28.7633
DATA	98	2	13	0	0	A_44_P550697	NM_001106400	758.987	192.667	3.652624e+002	3.667473e+001	389	29	6.698955e+000	0	0	0	0	0	0	347.277	1	1	49.1849	29.1268
DATA	99	2	14	0	0	A_64_P045429	A_64_P045429	784.676	192.353	9.745364e+001	1.028361e+001	152	27	6.620079e+000	0	0	0	0	0	0	93.0346	1	1	46.1809	28.0383
DATA	100	2	15	0	0	A_64_P075175	ENSRNOT00000044322	810.174	192.681	3.002481e+002	3.020247e+001	354	27	7.429385e+000	0	0	0	0	0	0	287.708	1	1	46.8651	28.6456
DATA	101	2	16	0	0	A_44_P472801	NM_173121	835.174	192.464	4.318841e+003	4.318964e+002	3991	27	6.629231e+000	0	0	0	0	0	0	4151.87	1	1	47.2035	27.555
DATA	102	2	17	0	0	A_42_P491486	NM_022533	860.461	192.882	3.649713e+003	3.649857e+002	3470	30	8.836136e+000	0	0	0	0	0	0	3519.07	1	1	49.8279	30.9282
DATA	103	2	18	0	0	A_43_P12736	NM_033299	886.418	192.573	9.164455e+001	9.721140e+000	151	28	6.552088e+000	0	0	0	0	0	0	88.5938	1	1	57.5363	28.5373
DATA	104	2	19	0	0	A_64_P158790	A_64_P158790	911.5	193	3.423371e+004	3.423372e+003	33089.5	28.5	7.747258e+000	0	0	0	0	0	0	33168	1	1	54.1152	28.901
DATA	105	2	20	0	0	A_44_P229481	NM_001191077	936.907	192.935	2.442724e+002	2.463976e+001	296	28	7.359118e+000	0	0	0	0	0	0	237.107	1	1	54.4085	28.1626
DATA	106	2	21	0	0	A_64_P133836	ENSRNOT00000039319	962.5	193	1.902323e+001	3.743646e+000	78	28	8.133102e+000	0	0	0	0	0	0	18.4934	1	1	54.1152	28.5784
DATA	107	2	22	0	0	A_43_P13137	NM_130818	987.5	193	3.266156e+001	4.586930e+000	92.5	28	7.758288e+000	0	0	0	0	0	0	31.7885	1	1	54.1152	28.9109
DATA	108	2	23	0	0	A_42_P586141	NM_017035	1013	192.569	2.899631e+002	2.917434e+001	338	29	6.564741e+000	0	0	0	0	0	0	282.435	1	1	44.7812	29.1594
DATA	109	2	24	0	0	A_44_P142850	NM_001106975	1038.3	192.857	7.755023e+001	8.395532e+000	133.5	30	7.885428e+000	0	0	0	0	0	0	75.5777	1	1	47.2035	29.5152
DATA	110	2	25	0	0	A_44_P1042504	NM_001044232	1063.86	192.699	1.907051e+002	1.933974e+001	247	32	8.584572e+000	0	0	0	0	0	0	185.886	1	1	47.5395	31.94
DATA	111	2	26	0	0	A_42_P476474	NM_001033926	1089.15	192.903	5.748179e+003	5.748269e+002	5488.5	28	7.768801e+000	0	0	0	0	0	0	5602.37	1	1	46.8651	29.0417
DATA	112	2	27	0	0	A_44_P480882	ENSRNOT00000035496	1114.5	193	2.299831e+001	3.954867e+000	82	31	7.753482e+000	0	0	0	0	0	0	22.4056	1	1	54.1152	31.1765
DATA	113	2	28	0	0	A_44_P1042696	NM_001106377	1140.15	192.893	7.586570e+003	7.586639e+002	7235.5	35	7.948762e+000	0	0	0	0	0	0	7385.51	1	1	50.1463	35.2292
DATA	114	2	29	0	0	A_64_P132576	NM_001012357	1165.73	192.781	2.842118e+002	2.860336e+001	335.5	30	7.247933e+000	0	0	0	0	0	0	276.391	1	1	48.2044	30.1244
DATA	115	2	30	0	0	A_42_P652357	NM_021868	1190.91	192.935	2.838380e+004	2.838382e+003	26984	30	8.789557e+000	0	0	0	0	0	0	27567.5	1	1	54.4085	30.6219
DATA	116	2	31	0	0	A_64_P134935	NM_001107976	1216.5	193	1.537196e+001	3.579314e+000	75	29	9.210280e+000	0	0	0	0	0	0	14.9063	1	0	54.1152	30.7709
DATA	117	2	32	0	0	A_64_P034019	NM_001107145	1241.53	192.973	4.754782e+001	5.752795e+000	107	29	7.404741e+000	0	0	0	0	0	0	46.0233	1	1	48.5334	29.3918
DATA	118	2	33	0	0	A_64_P140634	A_64_P140634	1267.09	192.884	3.766850e+003	3.766990e+002	3636	31	9.291754e+000	0	0	0	0	0	0	3638.32	1	1	46.8651	32.3384
DATA	120	2	35	0	0	A_42_P746029	NM_144748	1317.99	192.973	2.539146e+001	4.133237e+000	83	31	1.339391e+001	0	0	0	0	0	0	24.4038	1	1	46.8651	34.3911
DATA	121	2	36	0	0	A_64_P009032	NM_001105801	1343.5	193	3.284688e+004	3.284690e+003	30620	29	7.386276e+000	0	0	0	0	0	0	31479.5	1	1	54.1152	29.6935
DATA	122	2	37	0	0	A_42_P764792	NM_001014036	1368.88	192.905	4.496553e+002	4.508505e+001	473	31	9.117188e+000	0	0	0	0	0	0	429.615	1	1	47.5395	31.8274
DATA	123	2	38	0	0	A_64_P029278	NM_001108687	1394	192.789	4.604871e+002	4.616619e+001	495	29	7.461793e+000	0	0	0	0	0	0	438.533	1	1	46.8651	29.5529
DATA	124	2	39	0	0	A_43_P12266	NM_022622	1419.6	192.903	5.778094e+001	6.655512e+000	114	28	7.435344e+000	0	0	0	0	0	0	54.834	1	1	48.2044	28.9953
DATA	125	2	40	0	0	A_44_P204710	ENSRNOT00000049315	1445.43	192.588	1.909667e+001	3.826149e+000	78	28	7.435534e+000	0	0	0	0	0	0	18.054	1	1	46.5243	27.8365
DATA	126	2	41	0	0	A_64_P163837	NM_001013149	1470.38	193	1.569903e+002	1.604790e+001	208	28	7.602651e+000	0	0	0	0	0	0	147.863	1	1	48.5334	29.2537
DATA	127	2	42	0	0	A_64_P016202	XM_001080153	1495.81	192.478	7.348834e+000	3.421630e+000	65.5	28	7.837171e+000	0	0	0	0	0	0	6.89298	1	0	46.1809	29.0892
DATA	128	2	43	0	0	A_64_P137168	NM_053912	1520.44	192.894	9.835952e+003	9.836009e+002	8856	28	8.335650e+000	0	0	0	0	0	0	9188.64	1	1	45.4864	28.8283
DATA	129	2	44	0	0	A_42_P830598	XM_001063895	1546.44	193.027	9.308011e+002	9.314111e+001	922	29	7.721333e+000	0	0	0	0	0	0	865.662	1	1	48.5334	29.599
DATA	130	2	45	0	0	A_42_P525886	NM_001105716	1571.58	193.427	4.281277e+002	4.294641e+001	449	32	1.065312e+001	0	0	0	0	0	0	396.404	1	1	57.5363	33.8454
DATA	131	2	46	0	0	A_42_P836392	NM_134383	1597.23	192.727	9.180054e+003	9.180117e+002	8000.5	30	9.423254e+000	0	0	0	0	0	0	8458.76	1	1	45.4864	31.9809
DATA	132	2	47	0	0	A_44_P146783	NM_001001366	1621.74	193.321	4.044817e+001	5.295143e+000	94	29	8.996724e+000	0	0	0	0	0	0	37.1007	1	1	41.4593	31.1188
DATA	133	2	48	0	0	A_44_P294675	NM_053687	1648.38	192.765	2.561501e+002	2.584436e+001	289	30.5	1.197279e+001	0	0	0	0	0	0	233.714	1	1	46.5243	33.5284
DATA	134	2	49	0	0	A_64_P047137	NM_001001283	1673.42	193.427	2.693494e+001	4.378646e+000	81.5	28	6.531642e+000	0	0	0	0	0	0	24.4561	1	1	57.5363	28.0969
DATA	135	2	50	0	0	A_44_P170396	NM_017267	1698.58	193.427	1.965912e+001	3.988102e+000	78	28	8.001320e+000	0	0	0	0	0	0	17.7589	1	1	57.5363	29.1717
DATA	136	2	51	0	0	A_64_P077603	ENSRNOT00000037503	1724.42	193.427	1.098853e+002	1.152898e+001	162.5	30	7.945030e+000	0	0	0	0	0	0	98.7344	1	1	57.5363	30.2275
DATA	137	2	52	0	0	A_42_P648800	AA998304	1749.4	193.156	1.862726e+002	1.895453e+001	218	31	8.249694e+000	0	0	0	0	0	0	166.486	1	1	49.8279	30.7653
DATA	138	2	53	0	0	A_64_P143186	A_64_P143186	1775	193.455	6.288409e+001	7.209499e+000	117	29	6.529065e+000	0	0	0	0	0	0	55.9015	1	1	55.8519	29.2808
DATA	139	2	54	0	0	A_42_P622681	NM_001030020	1800.11	192.727	5.234990e+003	5.235110e+002	4488	28	6.826608e+000	0	0	0	1	0	0	4627.98	1	1	45.835	28.4793
DATA	140	2	55	0	0	A_42_P506076	NM_019253	1825.66	193.122	2.849130e+004	2.849133e+003	24242	28	7.369461e+000	0	0	0	0	0	0	25049.9	1	1	48.8603	28.1792
DATA	141	2	56	0	0	A_64_P158975	NM_001109536	1851.11	193.5	1.379837e+002	1.425643e+001	178	27	6.885979e+000	0	0	0	0	0	0	120.651	1	1	56.9804	26.8788
DATA	142	2	57	0	0	A_42_P655425	NM_001106406	1876.5	193.5	8.988347e+002	8.995573e+001	814	27	7.531115e+000	0	0	0	0	0	0	781.547	1	1	57.5363	28.4653
DATA	143	2	58	0	0	A_44_P408520	NM_031569	1901.8	193.28	2.397885e+002	2.425134e+001	265	28	6.565993e+000	0	0	0	1	0	0	207.328	1	1	49.1849	28.2673
DATA	144	2	59	0	0	A_64_P031259	NM_001002022	1927.68	193.333	1.613269e+002	1.653957e+001	198	29	9.095344e+000	0	0	0	0	0	0	138.693	1	1	51.0895	31.4229
DATA	145	2	60	0	0	A_43_P10227	NM_024397	1952.51	193.427	1.152012e+004	1.152017e+003	9377.5	28	8.753014e+000	0	0	0	0	0	0	9849.87	1	1	49.1849	28.9698
DATA	146	2	61	0	0	A_42_P542744	NM_001107544	1977.84	192.957	6.414316e+003	6.414422e+002	5423	29	7.491911e+000	0	0	0	1	0	0	5453.28	1	1	46.8651	30.0766
DATA	147	2	62	0	0	A_64_P052387	A_64_P052387	2003.5	193.5	9.596635e+001	1.028782e+001	140	28	8.016711e+000	0	0	0	0	0	0	81.1395	1	1	57.5363	29.1667
DATA	149	2	64	0	0	A_64_P064823	ENSRNOT00000050238	2054.18	193.333	3.758312e+002	3.776958e+001	363	33	1.148809e+001	0	0	0	0	0	0	314.284	1	1	47.5395	34.7344
DATA	150	2	65	0	0	A_42_P730292	NM_001004244	2079.58	193.427	2.481994e+003	2.482280e+002	2066	27	7.384834e+000	0	0	0	0	0	0	2064.37	1	1	57.5363	28.0585
DATA	151	2	66	0	0	A_64_P052878	FM104687	2105.11	193.5	4.915144e+002	4.929725e+001	460	28	7.062249e+000	0	0	0	0	0	0	406.631	1	1	56.9804	28.1907
DATA	152	2	67	0	0	A_64_P157171	XM_001063008	2130.43	193.492	2.261033e+003	2.261354e+002	1920	27	7.718045e+000	0	0	0	0	0	0	1860.79	1	1	45.835	27.9324
DATA	153	2	68	0	0	A_44_P693350	ENSRNOT00000030985	2155.67	193.5	2.385031e+001	4.510401e+000	78.5	26	7.055331e+000	0	0	0	0	0	0	19.5282	1	1	57.5363	27.4192
DATA	154	2	69	0	0	A_64_P090168	NM_001000720	2181.33	193.5	3.973382e+001	5.531099e+000	89	28	7.000597e+000	0	0	0	0	0	0	32.3682	1	1	57.5363	28.6566
DATA	155	2	70	0	0	A_42_P726392	NM_001106353	2206.5	193.5	1.551666e+003	1.552148e+002	1240	27	6.686900e+000	0	0	0	0	0	0	1257.89	1	1	57.5363	27.7448
DATA	156	2	71	0	0	A_64_P015727	FQ218047	2232	193.225	5.112191e+003	5.112338e+002	4103	28	7.173994e+000	0	0	0	0	0	0	4124.23	1	1	46.8651	28.3268
DATA	157	2	72	0	0	A_44_P897023	NM_001008364	2257.48	192.788	8.575211e+002	8.584093e+001	745	26	6.409225e+000	0	0	0	0	0	0	688.526	1	1	46.5243	25.8802
DATA	158	2	73	0	0	A_44_P104776	NM_001001425	2282.67	193.5	6.086641e+001	7.239970e+000	106	27	7.265669e+000	0	0	0	0	0	0	48.664	1	1	65	27.4519
DATA	159	2	74	0	0	A_64_P142521	A_64_P142521	2308.26	193.797	1.601501e+001	4.250373e+000	71	25	6.215390e+000	0	0	0	0	0	0	12.7502	1	0	48.5334	25.6667
DATA	160	2	75	66	1	DarkCorner	DarkCorner	2333.5	193.5	3.966493e+000	3.953439e+000	55	26	7.029632e+000	0	0	0	0	0	0	-0.843961	0	0	57.5363	25.6038
DATA	161	2	76	66	1	DarkCorner	DarkCorner	2359	193.545	3.981956e+000	3.968851e+000	55	25	6.930268e+000	0	0	0	0	0	0	-2.595	0	0	65	26.0095
DATA	162	2	77	66	1	DarkCorner	DarkCorner	2385.06	193.045	3.997464e+000	3.995124e+000	61	26	6.736353e+000	0	0	0	0	0	0	2.31123	0	0	46.8651	26.6941
DATA	163	2	78	66	1	DarkCorner	DarkCorner	2409.3	193.393	4.010245e+000	3.997047e+000	55	27	7.022618e+000	0	0	0	0	0	0	-0.321887	0	0	52.0157	27.2732
DATA	164	2	79	66	1	DarkCorner	DarkCorner	2434.96	193.481	6.009132e+000	4.054664e+000	59	28	7.177173e+000	0	0	0	0	0	0	4.69728	1	0	51.0895	27.9463
DATA	165	2	80	66	1	DarkCorner	DarkCorner	2460.65	193.663	4.034901e+000	4.029276e+000	61	27	6.915272e+000	0	0	0	0	0	0	1.9348	0	0	51.4001	26.9665
DATA	166	2	81	66	1	DarkCorner	DarkCorner	2486.25	193.931	5.798537e+000	4.073617e+000	62	27	7.416280e+000	0	0	0	0	0	0	4.50765	1	0	47.5395	28.0922
DATA	167	2	82	66	1	DarkCorner	DarkCorner	2511.42	193.573	8.766078e+000	4.135969e+000	64	29	7.129572e+000	0	0	0	0	0	0	6.79791	1	0	57.5363	29.0647
DATA	168	2	83	66	1	DarkCorner	DarkCorner	2537.14	193.543	1.617071e+001	4.361382e+000	70	27	7.331932e+000	0	0	0	0	0	0	12.5137	1	0	50.7771	27.3493
DATA	169	2	84	66	1	DarkCorner	DarkCorner	2562.42	193.573	1.312267e+001	4.264497e+000	67	27	6.946530e+000	0	0	0	0	0	0	10.1373	1	0	57.5363	27.3366
DATA	170	2	85	260	1	GE_BrightCorner	GE_BrightCorner	2587.5	193.648	4.887366e+004	4.887368e+003	37329	27	8.138308e+000	0	0	0	0	0	0	37702.7	1	1	57.5363	28.3068
DATA	171	3	1	66	1	DarkCorner	DarkCorner	441.582	199.573	1.635144e+001	3.943038e+000	73.5	28	7.034626e+000	0	0	0	1	0	0	14.2846	1	0	57.5363	28.443
DATA	172	3	2	66	1	DarkCorner	DarkCorner	467.418	199.573	1.099822e+001	3.720474e+000	71	33	9.320890e+000	0	0	0	0	0	0	9.69946	1	0	57.5363	33.8125
DATA	173	3	3	66	1	DarkCorner	DarkCorner	492.147	200.027	4.252388e+000	3.548989e+000	65	29	8.796420e+000	0	0	0	0	0	0	3.78299	1	0	47.5395	30.0185
DATA	174	3	4	66	1	DarkCorner	DarkCorner	517.848	199.955	3.505087e+000	3.502991e+000	65	28	6.083475e+000	0	0	0	0	0	0	2.30582	0	0	46.1809	28.6731
DATA	175	3	5	66	1	DarkCorner	DarkCorner	543.608	199.865	3.476877e+000	3.472070e+000	63	27	6.491537e+000	0	0	0	0	0	0	1.94079	0	0	48.5334	27.7736
DATA	176	3	6	66	1	DarkCorner	DarkCorner	569.387	199.947	3.450332e+000	3.438976e+000	63	30	7.311262e+000	0	0	0	0	0	0	-0.371207	0	0	49.1849	28
DATA	177	3	7	66	1	DarkCorner	DarkCorner	594.392	199.931	3.426266e+000	3.416012e+000	62	28	5.646893e+000	0	0	0	0	0	0	0.766887	0	0	53.8203	27.7714
DATA	178	3	8	66	1	DarkCorner	DarkCorner	620.013	199.987	3.403201e+000	3.392022e+000	61	28	8.169431e+000	0	0	0	0	0	0	0.112579	0	0	47.5395	27.9804
DATA	179	3	9	66	1	DarkCorner	DarkCorner	645.368	199.838	3.382034e+000	3.370903e+000	59	29	7.706395e+000	0	0	0	0	0	0	-2.10823	0	0	46.5243	28.7872
DATA	180	3	10	66	1	DarkCorner	DarkCorner	670.5	200	3.362422e+000	3.351355e+000	60	29	8.774607e+000	0	0	0	0	0	0	-0.528227	0	0	54.1152	31.0784
DATA	181	3	11	0	0	A_64_P269465	ENSRNOT00000055742	695.5	200	3.495465e+001	4.830105e+000	94.5	29.5	8.294271e+000	0	0	0	0	0	0	32.8687	1	1	65	31.3636
DATA	182	3	12	0	0	A_64_P140776	NM_001114502	721.222	200.222	5.758421e+003	5.758516e+002	5301	30	6.062553e+000	0	0	0	0	0	0	5442.7	1	1	47.8731	30.2
DATA	183	3	13	0	0	A_42_P662683	NM_001108855	746.5	200	1.715743e+004	1.715746e+003	15823	31	5.599272e+000	0	0	0	0	0	0	16291.5	1	1	48.5334	31.6852
DATA	184	3	14	0	0	A_44_P308687	NM_181389	771.907	199.935	1.725594e+002	1.756623e+001	223	30	6.877471e+000	0	0	0	0	0	0	164.549	1	1	54.4085	30.0196
DATA	185	3	15	0	0	A_42_P705255	NM_078622	797.219	199.75	1.438083e+002	1.474891e+001	195	30.5	7.911655e+000	0	0	0	0	0	0	137.661	1	1	45.1352	30.24
DATA	186	3	16	0	0	A_44_P142472	NM_001106072	822.629	200	7.939486e+003	7.939553e+002	7573	28	8.457567e+000	0	0	0	0	0	0	7626.91	1	1	47.2035	30.2609
DATA	187	3	17	0	0	A_64_P015946	NM_001009720	848	200.211	1.078759e+003	1.079249e+002	1086.5	28	6.093455e+000	0	0	0	0	0	0	1039.55	1	1	46.8651	29.098
DATA	188	3	18	0	0	A_64_P118698	ENSRNOT00000050943	873.5	200	4.483220e+001	5.533687e+000	103.5	31	7.153561e+000	0	0	0	0	0	0	43.321	1	1	54.1152	31.566
DATA	189	3	19	0	0	A_42_P705302	NM_001107361	898.493	200.127	6.761748e+003	6.761826e+002	6371.5	30	4.730617e+000	0	0	0	0	0	0	6549.31	1	1	47.8731	29.9535
DATA	190	3	20	0	0	A_64_P097547	NM_001100528	924.429	200.157	6.475962e+001	7.236531e+000	124.5	31	8.171628e+000	0	0	0	0	0	0	62.8556	1	1	47.5395	31.6
DATA	191	3	21	0	0	A_42_P815485	NM_001013908	949.437	199.972	9.564454e+003	9.564508e+002	9133	29	9.138438e+000	0	0	0	0	0	0	9298.44	1	1	48.2044	31.2245
DATA	192	3	22	0	0	A_42_P526728	ENSRNOT00000060758	974.757	200	2.369161e+003	2.369380e+002	2287	30	7.028737e+000	0	0	0	0	0	0	2306.36	1	1	46.8651	31.3922
DATA	193	3	23	0	0	A_42_P692317	NM_001107565	1000.34	200.091	9.994585e+002	9.999760e+001	1018	29	7.999167e+000	0	0	0	0	0	0	973.961	1	1	49.1849	30.3333
DATA	194	3	24	0	0	A_44_P383949	NM_175593	1025.61	200.069	4.223121e+001	5.307268e+000	103	29	6.813103e+000	0	0	0	0	0	0	41.1814	1	1	65	29.5
DATA	195	3	25	0	0	A_42_P589570	NM_001014105	1051.04	200.254	3.607307e+002	3.621589e+001	406	31	8.096281e+000	0	0	0	0	0	0	351.895	1	1	46.8651	30.3043
DATA	196	3	26	0	0	A_64_P012384	NM_001039338	1076.5	200	1.270896e+002	1.310885e+001	183	31	7.629870e+000	0	0	0	0	0	0	123.978	1	1	54.1152	31.4386
DATA	197	3	27	0	0	A_64_P088612	NM_053871	1101.5	200	5.456422e+003	5.456516e+002	5091.5	35	7.101118e+000	0	0	0	0	0	0	5321.41	1	1	48.5334	33.8824
DATA	198	3	28	0	0	A_42_P668072	NM_013130	1126.99	200.088	1.859539e+002	1.887141e+001	242	35	1.056183e+001	0	0	0	0	0	0	181.251	1	1	46.8651	36.4828
DATA	199	3	29	0	0	A_44_P624451	NM_001134605	1152.52	199.739	8.203261e+001	8.812138e+000	135	30	6.865214e+000	0	0	0	0	0	0	79.8855	1	1	46.8651	30.8214
DATA	200	3	30	0	0	A_64_P118502	A_64_P118502	1178.42	200.427	3.671169e+002	3.685283e+001	416.5	32	9.191286e+000	0	0	0	0	0	0	357.117	1	1	57.5363	32.537
DATA	201	3	31	0	0	A_43_P15761	NM_031608	1204.17	199.707	1.687903e+002	1.718478e+001	218.5	36.5	1.466095e+001	0	0	0	0	0	0	163.94	1	1	49.5074	39
DATA	202	3	32	0	0	A_42_P667696	NM_001191800	1228.73	199.968	1.395876e+003	1.396250e+002	1398	31	8.650191e+000	0	0	0	0	0	0	1353.57	1	1	45.1352	32.0625
DATA	203	3	33	0	0	A_44_P899121	NM_001079941	1254.3	200.1	4.328428e+003	4.328549e+002	4052.5	31	8.382416e+000	0	0	0	0	0	0	4189.03	1	1	47.2035	30.98
DATA	204	3	34	0	0	A_42_P642757	NM_031235	1279.38	200	4.587055e+003	4.587170e+002	4321	30	8.959696e+000	0	0	0	0	0	0	4429.57	1	1	48.5334	32.6458
DATA	205	3	35	0	0	A_64_P066694	NM_001033898	1304.96	200.125	6.561193e+001	7.323754e+000	122.5	32	1.058297e+001	0	0	0	0	0	0	63.2034	1	1	46.8651	34.2041
DATA	206	3	36	0	0	A_42_P699201	TC594545	1330.58	200.427	3.722980e+001	4.950326e+000	97	31	6.298340e+000	0	0	0	0	0	0	35.7669	1	1	65	30.1509
DATA	207	3	37	0	0	A_42_P591944	NM_172093	1356	200.455	1.431293e+002	1.468222e+001	194	34	8.329118e+000	0	0	0	0	0	0	137.103	1	1	55.8519	33.7222
DATA	208	3	38	0	0	A_44_P115293	NM_001108294	1381.17	199.924	2.207566e+002	2.231840e+001	266	32	7.387603e+000	0	0	0	0	0	0	210.788	1	1	45.835	32.3065
DATA	209	3	39	1028	1	(+)E1A_r60_a107	E1A_r60_a107	1406.58	200.427	2.205930e+001	3.964059e+000	81	29.5	5.243111e+000	0	0	0	0	0	0	20.9938	1	1	65	29.9815
DATA	210	3	40	0	0	A_44_P194531	NM_001007742	1432.33	200.5	2.307104e+002	2.330663e+001	279	27	6.009487e+000	0	0	0	0	0	0	218.776	1	1	57.5363	26.9623
DATA	211	3	41	0	0	A_43_P20016	NM_001107377	1457.56	200.466	1.211126e+002	1.255750e+001	172	29	8.107706e+000	0	0	0	0	0	0	114.419	1	1	49.1849	30.4902
DATA	212	3	42	0	0	A_64_P105550	A_64_P105550	1482.89	200.5	1.237308e+002	1.281360e+001	179	30	6.815468e+000	0	0	0	0	0	0	116.433	1	1	56.9804	30.9808
DATA	213	3	43	0	0	A_42_P791872	NM_001135174	1508.25	200.373	8.564266e+003	8.564331e+002	7796	31	8.445013e+000	0	0	0	0	0	0	8025.91	1	1	49.1849	30.2308
DATA	214	3	44	0	0	A_42_P499273	NM_001012148	1533.58	200.457	2.393643e+003	2.393878e+002	2154.5	31	7.644811e+000	0	0	0	0	0	0	2233.63	1	1	51.0895	31.3922
DATA	215	3	45	0	0	A_64_P021960	NM_001109493	1558.83	200.186	4.173184e+002	4.186802e+001	448	33	7.359991e+000	0	0	0	0	0	0	387.687	1	1	46.8651	32.9815
DATA	216	3	46	0	0	A_64_P083725	A_64_P083725	1584.5	200.5	1.200455e+005	1.200455e+004	111447	37	1.297377e+001	0	0	0	0	0	0	111010	1	1	57.5363	37.26
DATA	217	3	47	0	0	A_42_P524536	NM_012698	1609.67	200.5	3.562707e+002	3.578946e+001	377	31	1.112908e+001	0	0	0	0	0	0	327.915	1	1	57.5363	34.7115
DATA	218	3	48	0	0	A_64_P151675	NM_175755	1635.42	200.427	7.679661e+001	8.407737e+000	131	27	9.663033e+000	0	0	0	0	0	0	70.336	1	1	57.5363	30.0556
DATA	219	3	49	0	0	A_64_P146914	A_64_P146914	1660.63	200.573	2.009690e+003	2.009984e+002	1815.5	30.5	7.796817e+000	0	0	0	0	0	0	1831.59	1	1	49.1849	31.4524
DATA	220	3	50	0	0	A_64_P115065	NM_001109631	1686.11	200.5	2.603729e+001	4.327787e+000	82	28	6.758778e+000	0	0	0	0	0	0	23.6087	1	1	56.9804	28.1228
DATA	221	3	51	0	0	A_42_P468771	NM_001107362	1711.57	200.605	2.588960e+003	2.589193e+002	2288	27.5	4.926366e+000	0	0	0	0	0	0	2335.35	1	1	49.5074	27.6739
DATA	222	3	52	0	0	A_44_P226461	NM_053798	1736.57	200.608	1.606759e+003	1.607139e+002	1421	29	7.298817e+000	0	0	0	0	0	0	1441.86	1	1	49.1849	29.7273
DATA	223	3	53	0	0	A_64_P009440	NM_001109313	1762.08	200.493	2.565762e+001	4.349296e+000	79	28.5	6.891315e+000	0	0	0	0	0	0	22.9005	1	1	47.8731	28.9815
DATA	224	3	54	0	0	A_44_P282433	NM_033230	1787.5	200.5	6.379116e+002	6.388881e+001	597	32.5	9.267192e+000	0	0	0	0	0	0	566.284	1	1	57.5363	32.9615
DATA	225	3	55	0	0	A_42_P461003	NM_001044283	1813.11	200.5	1.393981e+004	1.393985e+003	12054	32.5	7.060510e+000	0	0	0	0	0	0	12306.5	1	1	56.9804	32.1296
DATA	226	3	56	0	1	ETG10_236652	ETG10_236652	1838.5	200.5	1.567992e+001	3.899315e+000	73	29	7.896438e+000	0	0	0	0	0	0	13.7665	1	0	57.5363	28.9216
DATA	227	3	57	0	0	A_42_P529780	NM_138855	1863.57	200.605	8.061920e+002	8.069908e+001	725	27.5	8.364905e+000	0	0	0	0	0	0	703.955	1	1	49.5074	29.3333
DATA	228	3	58	0	0	A_42_P492976	NM_001126099	1888.95	200.842	3.263975e+002	3.283874e+001	326	30	7.592065e+000	0	0	0	0	0	0	283.434	1	1	48.2044	30.8367
DATA	229	3	59	0	0	A_42_P533865	NM_001127650	1914.42	200.851	3.280327e+001	4.892522e+000	87	29	9.161669e+000	0	0	0	0	0	0	28.3262	1	1	48.5334	30.75
DATA	230	3	60	0	0	A_64_P026399	NM_001007626	1940	200.545	1.047024e+003	1.047661e+002	926	31.5	8.763118e+000	0	0	0	0	0	0	898.991	1	1	55.8519	31.94
DATA	231	3	61	0	0	A_64_P152543	XM_221353	1965.27	200.592	1.450332e+004	1.450336e+003	12030.5	32.5	9.423663e+000	0	0	0	0	0	0	12383.9	1	1	47.8731	32.6923
DATA	232	3	62	0	0	A_44_P203195	NM_053585	1990.53	200.579	1.123549e+003	1.124156e+002	997	34	9.340654e+000	0	0	0	0	0	0	954.07	1	1	49.8279	33.4182
DATA	233	3	63	0	0	A_42_P490612	NM_001108262	2015.87	200.757	8.035354e+003	8.035440e+002	6466	30	7.438034e+000	0	0	0	0	0	0	6786	1	1	46.5243	30.0536
DATA	234	3	64	0	0	A_44_P457548	NM_001103351	2041.29	200.639	1.132490e+002	1.192400e+001	153.5	29	7.846250e+000	0	0	0	0	0	0	95.1152	1	1	48.2044	29.6
DATA	235	3	65	0	0	A_42_P755665	NM_001013154	2067.08	200.853	2.332433e+003	2.332735e+002	1918	31	1.175353e+001	0	0	0	0	0	0	1948.29	1	1	47.8731	33.9796
DATA	236	3	66	0	0	A_42_P781999	NM_001106378	2092.44	200.973	2.335622e+004	2.335625e+003	18855	28	6.415047e+000	0	0	0	0	0	0	19406	1	1	48.5334	28.8837
DATA	237	3	67	0	0	A_44_P100289	ENSRNOT00000049514	2117.93	200.814	7.312118e+001	8.237202e+000	118.5	29	7.400722e+000	0	0	0	0	0	0	60.4316	1	1	46.8651	29.1321
DATA	238	3	68	0	0	A_42_P629599	ENSRNOT00000023101	2143.42	200.573	7.949534e+002	7.958672e+001	695.5	29	8.012961e+000	0	0	0	0	0	0	653.554	1	1	57.5363	28.8491
DATA	239	3	69	0	0	A_44_P192083	NM_001047088	2168.72	200.816	5.395200e+001	6.617442e+000	103	30	7.676856e+000	0	0	0	0	0	0	44.1343	1	1	49.5074	30.4706
DATA	240	3	70	0	0	A_42_P498066	NM_031136	2194	200.545	9.598500e+004	9.598501e+003	78482	32.5	9.998581e+000	0	0	0	0	0	0	78127.5	1	1	55.8519	33.8333
DATA	241	3	71	0	0	A_42_P519910	NM_001106292	2219.14	200.722	2.565350e+004	2.565353e+003	20303	29	8.245114e+000	0	0	0	0	0	0	20782.2	1	1	47.8731	29.6923
DATA	242	3	72	0	0	A_42_P657538	NM_001008362	2244.5	200.944	4.359688e+003	4.359862e+002	3390.5	25	6.567120e+000	0	0	0	0	0	0	3515.55	1	1	48.5334	26.4118
DATA	243	3	73	0	0	A_64_P030630	NM_001109610	2270.31	200.92	4.623834e+003	4.623999e+002	3730	30	7.397350e+000	0	0	0	0	0	0	3711.44	1	1	48.8603	29.8627
DATA	244	3	74	0	0	A_44_P126366	NM_001017456	2295.5	200.648	5.140125e+001	6.465644e+000	97	28.5	7.742899e+000	0	0	0	0	0	0	41.0781	1	1	57.5363	28.5185
DATA	245	3	75	0	0	A_43_P15627	ENSRNOT00000067029	2321.03	200.971	3.856388e+001	5.512024e+000	87	26	6.701715e+000	0	0	0	0	0	0	30.6925	1	1	46.8651	26.3214
DATA	246	3	76	0	0	A_42_P754784	CB328432	2346.5	201.257	6.307983e+003	6.308106e+002	4991.5	27	6.973519e+000	0	0	0	0	0	0	5000.84	1	1	47.2035	28.0213
DATA	247	3	77	66	1	DarkCorner	DarkCorner	2372.24	201.027	3.982221e+000	3.969115e+000	56.5	24	6.984331e+000	0	0	0	0	0	0	-0.305295	0	0	49.1849	26.0492
DATA	248	3	78	66	1	DarkCorner	DarkCorner	2398.09	200.841	3.996747e+000	3.983593e+000	54	28	6.192310e+000	0	0	0	0	0	0	-1.68034	0	0	50.1463	28.0377
DATA	249	3	79	66	1	DarkCorner	DarkCorner	2422.41	201.067	4.009164e+000	3.998467e+000	58	27	5.341441e+000	0	0	0	0	0	0	1.10845	0	0	49.1849	26.766
DATA	250	3	80	66	1	DarkCorner	DarkCorner	2447.61	200.931	4.021465e+000	4.009995e+000	58	27	8.186815e+000	0	0	0	0	0	0	0.930431	0	0	53.8203	28.5094
DATA	251	3	81	66	1	DarkCorner	DarkCorner	2473.05	200.887	5.596725e+000	4.058269e+000	61	28	7.440510e+000	0	0	0	0	0	0	4.36445	1	0	49.1849	28.1864
DATA	252	3	82	66	1	DarkCorner	DarkCorner	2499.06	200.985	4.043032e+000	4.043532e+000	58	29	7.634743e+000	0	0	0	0	0	0	2.59696	0	0	46.8651	29.1111
DATA	253	3	83	66	1	DarkCorner	DarkCorner	2524.51	201.275	8.593273e+000	4.128772e+000	65.5	29	6.397999e+000	0	0	0	0	0	0	6.66992	1	0	47.2035	28.5417
DATA	254	3	84	66	1	DarkCorner	DarkCorner	2549.6	201.04	4.211957e+000	4.068075e+000	59	29	7.611291e+000	0	0	0	0	0	0	3.26289	1	0	49.1849	30.0962
DATA	255	3	85	66	1	DarkCorner	DarkCorner	2575.45	200.918	1.487293e+001	4.317145e+000	68	28	9.936541e+000	0	0	0	0	0	0	11.5027	1	0	49.8279	30.2647
DATA	256	4	1	66	1	DarkCorner	DarkCorner	454.48	206.747	1.267185e+001	3.785403e+000	71	32	7.964275e+000	0	0	0	1	0	0	11.1353	1	0	48.5334	32.3721
DATA	257	4	2	66	1	DarkCorner	DarkCorner	479.972	206.873	1.177816e+001	3.725745e+000	71	31	7.672796e+000	0	0	0	1	0	0	10.4447	1	0	46.8651	31.7778
DATA	258	4	3	66	1	DarkCorner	DarkCorner	505.182	207.325	5.120156e+000	3.541577e+000	66.5	29	6.732862e+000	0	0	0	0	0	0	4.57973	1	0	49.5074	30.5789
DATA	259	4	4	66	1	DarkCorner	DarkCorner	530.587	207.16	3.487399e+000	3.485474e+000	63	29	7.911949e+000	0	0	0	0	0	0	2.32543	0	0	49.1849	30.3529
DATA	260	4	5	66	1	DarkCorner	DarkCorner	555.753	207.148	3.460760e+000	3.449370e+000	59	27	6.830751e+000	0	0	0	0	0	0	-1.64424	0	0	50.4627	27.7027
DATA	261	4	6	66	1	DarkCorner	DarkCorner	582.12	206.973	3.434693e+000	3.423389e+000	60	30	7.097251e+000	0	0	0	0	0	0	-3.0295	0	0	47.2035	27.875
DATA	262	4	7	66	1	DarkCorner	DarkCorner	607.181	206.639	3.411616e+000	3.400387e+000	56	27	5.813407e+000	0	0	0	0	0	0	-4.1091	0	0	46.8651	27.0645
DATA	263	4	8	66	1	DarkCorner	DarkCorner	632.506	206.766	3.389653e+000	3.378497e+000	56	28	6.782330e+000	0	0	0	0	0	0	-3.76977	0	0	49.1849	27.5
DATA	264	4	9	66	1	DarkCorner	DarkCorner	657.582	207.427	3.369197e+000	3.358108e+000	58	32	9.252346e+000	0	0	0	0	0	0	-3.32316	0	0	57.5363	31.9655
DATA	265	4	10	0	0	A_44_P807031	NM_001108921	683.289	207.316	5.624856e+003	5.624955e+002	5248.5	32.5	8.840814e+000	0	0	0	0	0	0	5280.27	1	1	49.5074	33
DATA	266	4	11	0	0	A_64_P025813	NM_001009379	708.418	207.427	7.668389e+000	3.409120e+000	68	30	6.464253e+000	0	0	0	0	0	0	7.23608	1	0	57.5363	30.8261
DATA	267	4	12	0	0	A_64_P130551	XM_001081846	733.667	207.5	1.945217e+001	3.835637e+000	82	30	5.134199e+000	0	0	0	0	0	0	18.4442	1	1	57.5363	30.88
DATA	268	4	13	0	0	A_42_P715449	NM_001033709	759.333	207.5	2.026074e+003	2.026342e+002	1922	32	5.182863e+000	0	0	0	1	0	0	1929.73	1	1	57.5363	32.8276
DATA	269	4	14	0	0	A_42_P727584	NM_031622	784.456	206.838	3.950044e+003	3.950180e+002	3716	33	7.814506e+000	0	0	0	0	0	0	3777.06	1	1	46.8651	33.069
DATA	270	4	15	0	0	A_42_P600642	NM_001008386	809.893	207.5	3.219474e+002	3.235995e+001	361.5	33	1.087683e+001	0	0	0	0	0	0	309.007	1	1	56.9804	33.2188
DATA	271	4	16	0	0	A_42_P669103	NM_001108329	835.221	206.868	1.168595e+003	1.169048e+002	1177	26	7.437424e+000	0	0	0	0	0	0	1125.24	1	1	46.1809	27.6207
DATA	272	4	17	0	0	A_44_P715330	NM_001024966	860.564	207.603	6.597609e+002	6.605587e+001	690	31	8.094735e+000	0	0	0	0	0	0	637.197	1	1	50.1463	31.5161
DATA	273	4	18	0	0	A_64_P083185	NM_001107199	886.104	207.442	5.948839e+002	5.957641e+001	642	29.5	7.138384e+000	0	0	0	0	0	0	576.013	1	1	50.1463	31.5
DATA	274	4	19	0	0	A_64_P037313	ENSRNOT00000030164	911.5	207.5	2.201238e+001	3.908771e+000	84	30	8.007628e+000	0	0	0	0	0	0	21.3613	1	1	57.5363	31.3824
DATA	275	4	20	0	0	A_44_P321009	NM_012540	936.893	207.5	1.923792e+001	3.754381e+000	78.5	32	1.032400e+001	0	0	0	0	0	0	18.7036	1	1	56.9804	34.5806
DATA	276	4	21	0	0	A_42_P700753	FQ212883	962.397	207.013	2.076480e+003	2.076729e+002	2009	29	7.130956e+000	0	0	0	0	0	0	2021.76	1	1	49.1849	31.0357
DATA	277	4	22	0	0	A_44_P775974	NM_001024363	987.667	207.261	9.536701e+000	3.353925e+000	71.5	31	7.146997e+000	0	0	0	0	0	0	9.29649	1	0	47.2035	31.7097
DATA	278	4	23	0	0	A_44_P503868	A_44_P503868	1013.06	207.379	2.607289e+003	2.607487e+002	2608	28.5	7.631529e+000	0	0	0	0	0	0	2543.79	1	1	45.4864	28.6333
DATA	279	4	24	0	0	A_64_P122541	A_64_P122541	1038.5	207.471	3.507019e+002	3.521689e+001	409	31	8.943360e+000	0	0	0	0	0	0	342.341	1	1	47.2035	30.625
DATA	280	4	25	0	0	A_64_P080967	NM_001033890	1063.74	207.222	1.245292e+004	1.245297e+003	11745	31	8.571059e+000	0	0	0	0	0	0	12158.1	1	1	47.5395	31.0345
DATA	281	4	26	0	0	A_44_P1056309	NM_001105912	1089.73	207.013	3.238290e+001	4.560342e+000	91	34	6.413468e+000	0	0	0	0	0	0	31.6118	1	1	49.1849	32.5152
DATA	282	4	27	0	0	A_44_P199514	NM_001005564	1114.5	207.471	2.737945e+003	2.738133e+002	2618	33	7.424169e+000	0	0	0	0	0	0	2671.8	1	1	47.2035	31.4194
DATA	283	4	28	0	0	A_64_P097952	NM_001134962	1140.11	207.5	6.121193e+001	6.913847e+000	123	32	7.488530e+000	0	0	0	0	0	0	59.6905	1	1	56.9804	32.2432
DATA	284	4	29	0	0	A_42_P813939	NM_001108741	1165.27	207.3	2.667222e+003	2.667416e+002	2681.5	27	6.242334e+000	0	0	0	0	0	0	2598.29	1	1	47.2035	28.4688
DATA	285	4	30	0	0	A_64_P006423	NM_012584	1190.62	207.261	2.215346e+001	3.909932e+000	82	35.5	7.056226e+000	0	0	0	0	0	0	21.5533	1	1	46.8651	35.875
DATA	286	4	31	0	0	A_42_P670614	NM_001107097	1216.19	207.392	7.692564e+003	7.692632e+002	7272.5	33	9.475265e+000	0	0	0	0	0	0	7472.58	1	1	49.1849	33.2258
DATA	287	4	32	0	0	A_64_P084088	NM_001011954	1241.61	207.229	3.316784e+002	3.332501e+001	375	30.5	7.713550e+000	0	0	0	0	0	0	321.601	1	1	47.2035	30.8667
DATA	288	4	33	0	0	A_64_P025643	XM_001073566	1267.46	207.566	3.358999e+002	3.374583e+001	393	31.5	7.742807e+000	0	0	0	0	0	0	325.019	1	1	49.5074	31.3929
DATA	289	4	34	0	0	A_42_P719607	NM_153721	1292.49	207.494	3.218145e+001	4.571525e+000	90	32	7.746364e+000	0	0	0	0	0	0	31.0673	1	1	50.1463	32.6154
DATA	290	4	35	0	0	A_42_P843603	NM_052800	1317.37	207.64	3.756479e+002	3.770556e+001	403	30	5.734048e+000	0	0	0	0	0	0	361.738	1	1	48.8603	29.5
DATA	291	4	36	0	0	A_44_P234129	NM_001135802	1343.21	207.587	1.538009e+002	1.572269e+001	204.5	34.5	8.827572e+000	0	0	0	0	0	0	147.684	1	1	49.1849	33.2059
DATA	292	4	37	0	0	A_42_P701161	NM_001033666	1368.63	207.36	7.967993e+003	7.968061e+002	7461	31.5	7.898250e+000	0	0	0	0	0	0	7627.73	1	1	48.8603	32.2647
DATA	293	4	38	0	0	A_44_P1017335	NM_001108607	1394	207.271	9.730981e+003	9.731037e+002	9024	29	7.131784e+000	0	0	0	0	0	0	9285.2	1	1	46.8651	32.0769
DATA	294	4	39	0	0	A_44_P900209	CV121387	1419.5	207.648	8.735648e+001	9.336836e+000	141.5	30	5.864958e+000	0	0	0	0	0	0	83.0707	1	1	57.5363	28.9091
DATA	295	4	40	0	0	A_64_P037517	ENSRNOT00000014921	1444.68	207.353	7.301981e+001	8.016459e+000	128	29	9.721982e+000	0	0	0	0	0	0	69.184	1	1	46.1809	30.7059
DATA	296	4	41	0	0	A_64_P128528	NM_001106013	1470.06	207.609	3.088668e+003	3.088846e+002	3018.5	29	5.804337e+000	0	0	0	0	0	0	2915.33	1	1	44.7812	30.0968
DATA	297	4	42	0	0	A_64_P378865	NM_001000706	1495.5	207.648	8.985889e+001	9.584532e+000	145	32	7.527764e+000	0	0	0	0	0	0	84.476	1	1	57.5363	31.7429
DATA	298	4	43	0	0	A_42_P553960	NM_001107831	1520.92	207.608	1.030185e+004	1.030191e+003	9172	34	1.047367e+001	0	0	0	0	0	0	9644.18	1	1	48.8603	33.3824
DATA	299	4	44	0	0	A_42_P717654	XM_001063683	1546	207.797	3.939647e+003	3.939791e+002	3582	36	7.505553e+000	0	0	0	0	0	0	3672.44	1	1	46.8651	34
DATA	300	4	45	0	0	A_44_P295118	NM_001107228	1571.57	207.716	2.880689e+002	2.900425e+001	315	36	9.039798e+000	0	0	0	0	0	0	267.314	1	1	46.5243	35.7778
DATA	301	4	46	0	0	A_64_P049057	ENSRNOT00000014519	1597	207.797	1.522237e+003	1.522615e+002	1392	31	9.152377e+000	0	0	0	0	0	0	1406.03	1	1	46.8651	33.1379
DATA	302	4	47	0	0	A_42_P810287	NM_001004107	1622.28	207.552	2.320609e+003	2.320859e+002	2120	29.5	8.624562e+000	0	0	0	0	0	0	2133.21	1	1	45.835	30.0625
DATA	303	4	48	0	0	A_42_P702729	NM_001107557	1647.73	207.91	1.943068e+003	1.943370e+002	1809	31	1.256754e+001	0	0	0	0	0	0	1777.51	1	1	49.1849	33.5926
DATA	304	4	49	0	0	A_42_P811084	NM_173147	1673.14	207.808	2.600331e+003	2.600560e+002	2322	34	6.670138e+000	0	0	0	0	0	0	2366.84	1	1	47.5395	35.25
DATA	305	4	50	0	0	A_64_P151473	A_64_P151473	1698.69	208.023	2.320925e+004	2.320927e+003	20867	29	5.985538e+000	0	0	0	0	0	0	21017.6	1	1	50.7771	28.92
DATA	306	4	51	0	0	A_44_P134634	ENSRNOT00000000260	1724.01	207.897	1.295478e+002	1.341390e+001	177	27	1.056756e+001	0	0	0	0	0	0	116.704	1	1	46.8651	31.56
DATA	307	4	52	0	0	A_44_P178479	NM_001135039	1749.44	207.973	9.832899e+002	9.839119e+001	948	36	8.674605e+000	0	0	0	0	0	0	881.139	1	1	48.5334	33.0345
DATA	308	4	53	0	0	A_64_P317400	ENSRNOT00000068382	1775	208	4.327911e+001	5.576610e+000	99	29	9.516196e+000	0	0	0	0	0	0	38.5744	1	1	54.9904	31.1714
DATA	309	4	54	0	0	A_42_P781735	NM_053319	1800.5	208	9.129818e+004	9.129819e+003	80947	35.5	8.928195e+000	0	0	0	0	0	0	80931.6	1	1	54.1152	35.2632
DATA	310	4	55	0	0	A_64_P144869	NM_017131	1825.77	207.884	3.260612e+002	3.279938e+001	339	31	5.919209e+000	0	0	0	0	0	0	287.462	1	1	46.5243	30.037
DATA	311	4	56	0	0	A_44_P445484	ENSRNOT00000049980	1850.8	207.911	9.197564e+002	9.204509e+001	863	28	8.406347e+000	0	0	0	0	0	0	806.484	1	1	49.1849	29
DATA	312	4	57	0	0	A_42_P487832	NM_001108389	1876.44	207.973	2.239455e+003	2.239744e+002	1874	31	7.727343e+000	0	0	0	0	0	0	1952.72	1	1	48.5334	31.6129
DATA	313	4	58	0	0	A_42_P482829	NM_001108138	1901.59	207.908	9.374566e+002	9.381532e+001	824	29	5.540202e+000	0	0	0	0	0	0	812.926	1	1	49.1849	29.4583
DATA	314	4	59	0	0	A_64_P101440	XM_001065775	1927.25	207.698	1.042088e+001	3.781622e+000	67	28.5	8.298248e+000	0	0	0	0	0	0	8.9855	1	0	44.7812	29.9667
DATA	315	4	60	0	0	A_64_P072268	NM_001002277	1952.37	208.07	8.121960e+002	8.130179e+001	765.5	35	7.917847e+000	0	0	0	0	0	0	696.533	1	1	47.5395	33
DATA	316	4	61	0	0	A_42_P589190	NM_023104	1978.09	208.065	8.664521e+002	8.672314e+001	786	37	1.017359e+001	0	0	0	0	0	0	738.897	1	1	54.4085	34.2424
DATA	317	4	62	0	0	A_64_P027328	A_64_P027328	2003.22	208	3.625401e+002	3.644190e+001	371	32	8.192837e+000	0	0	0	0	0	0	307.48	1	1	46.1809	31.5484
DATA	318	4	63	0	0	A_42_P788541	NM_001106794	2028.88	208	5.933927e+003	5.934044e+002	4862	30	6.764485e+000	0	0	0	0	0	0	5004.94	1	1	49.8279	29.7297
DATA	319	4	64	0	0	A_42_P457003	NM_012802	2054	207.797	6.044647e+003	6.044762e+002	4948	29	1.026006e+001	0	0	0	0	0	0	5070.78	1	1	46.8651	32.2857
DATA	320	4	65	0	0	A_64_P095695	A_64_P095695	2079.52	208.152	9.197649e+001	9.935153e+000	133	33	1.374203e+001	0	0	0	0	0	0	76.7489	1	1	45.835	36.48
DATA	321	4	66	0	0	A_42_P463880	NM_001013927	2105.09	208.065	7.591306e+001	8.478810e+000	122	29.5	4.537917e+000	0	0	0	0	0	0	63.007	1	1	54.4085	29.7941
DATA	322	4	67	0	0	A_43_P20354	NM_001134574	2130.33	208.25	1.195518e+002	1.254336e+001	155	29	8.314853e+000	0	0	0	0	0	0	98.7187	1	1	47.5395	31.0333
DATA	323	4	68	0	0	A_64_P055958	ENSRNOT00000056114	2155.61	208.069	5.435187e+001	6.640715e+000	102	30	6.961432e+000	0	0	0	0	0	0	44.6512	1	1	53.8203	30.3333
DATA	324	4	69	0	0	A_64_P159044	ENSRNOT00000040690	2181.42	208.427	8.711102e+002	8.719538e+001	800	31.5	7.382307e+000	0	0	0	0	0	0	712.07	1	1	57.5363	31.5385
DATA	325	4	70	0	0	A_44_P473234	ENSRNOT00000024858	2206.5	208.352	6.517028e+002	6.528409e+001	561.5	30	1.051155e+001	0	0	0	0	0	0	530.156	1	1	57.5363	32.1667
DATA	326	4	71	0	0	A_42_P797965	NM_001108497	2232	208.455	1.118102e+003	1.118772e+002	947.5	27	6.184161e+000	0	0	0	0	0	0	905.279	1	1	55.8519	26.3793
DATA	327	4	72	0	0	A_42_P592157	NM_001002828	2257.5	207.743	3.130609e+002	3.154683e+001	313	28	7.134367e+000	0	0	0	1	0	0	252.266	1	1	47.2035	28.0625
DATA	328	4	73	0	0	A_64_P016419	NM_001000622	2282.58	208.427	4.407530e+001	5.889422e+000	93.5	34	1.032354e+001	0	0	0	0	0	0	35.3671	1	1	57.5363	33.037
DATA	329	4	74	0	0	A_44_P306863	XM_344447	2307.9	208.06	1.355514e+003	1.356081e+002	1145	27	7.270552e+000	0	0	0	0	0	0	1083.01	1	1	46.8651	28.9667
DATA	330	4	75	0	0	A_42_P471835	TC610276	2333.48	208.147	2.977965e+003	2.978226e+002	2377.5	28	6.972891e+000	0	0	0	0	0	0	2369.64	1	1	49.8279	28.6061
DATA	331	4	76	0	1	ETG02_36680	ETG02_36680	2359	208.455	1.238405e+001	4.143544e+000	65	28	7.562375e+000	0	0	0	0	0	0	9.81694	1	0	55.8519	28.1875
DATA	332	4	77	66	1	DarkCorner	DarkCorner	2384.42	208.427	3.981701e+000	3.968596e+000	52	28	6.385882e+000	0	0	0	0	0	0	-4.07794	0	0	57.5363	27.8
DATA	333	4	78	66	1	DarkCorner	DarkCorner	2409.61	208.348	3.995263e+000	3.983386e+000	57	29	4.247895e+000	0	0	0	0	0	0	0.792261	0	0	47.2035	28.2692
DATA	334	4	79	66	1	DarkCorner	DarkCorner	2435.42	208.427	4.008051e+000	3.998888e+000	59	29	7.732441e+000	0	0	0	0	0	0	1.40793	0	0	57.5363	29.1724
DATA	335	4	80	66	1	DarkCorner	DarkCorner	2460.58	208.427	4.019611e+000	4.006381e+000	55	29.5	6.326786e+000	0	0	0	0	0	0	-2.52848	0	0	57.5363	29.6875
DATA	336	4	81	66	1	DarkCorner	DarkCorner	2486	208.455	4.030204e+000	4.016940e+000	54.5	27	7.735870e+000	0	0	0	0	0	0	-1.93696	0	0	55.8519	27.5333
DATA	337	4	82	66	1	DarkCorner	DarkCorner	2511.74	208.122	4.040166e+000	4.035511e+000	61	29	7.427266e+000	0	0	0	0	0	0	2.05463	0	0	48.2044	28.75
DATA	338	4	83	66	1	DarkCorner	DarkCorner	2537.05	208.692	6.099325e+000	4.080349e+000	63	29.5	6.145417e+000	0	0	0	0	0	0	4.73869	1	0	49.5074	30.6154
DATA	339	4	84	66	1	DarkCorner	DarkCorner	2561.86	208.178	6.011334e+000	4.086370e+000	62	33	6.500620e+000	0	0	0	0	0	0	4.66177	1	0	53.5237	32
DATA	340	4	85	66	1	DarkCorner	DarkCorner	2587.88	208.382	1.881970e+001	4.463687e+000	71	26	7.642830e+000	0	0	0	0	0	0	14.5743	1	0	52.9257	26.5476
DATA	341	5	1	66	1	DarkCorner	DarkCorner	441.667	214.5	1.153127e+001	3.760835e+000	73	28	6.922369e+000	0	0	0	1	0	0	10.0971	1	0	57.5363	28.3154
DATA	342	5	2	66	1	DarkCorner	DarkCorner	467.312	214.234	7.135483e+000	3.617653e+000	69	33	7.780866e+000	0	0	0	0	0	0	6.30638	1	0	49.8279	33.4483
DATA	343	5	3	66	1	DarkCorner	DarkCorner	491.96	214.347	5.002458e+000	3.551762e+000	66	32.5	7.825868e+000	0	0	0	0	0	0	4.4592	1	0	49.1849	32.7059
DATA	344	5	4	66	1	DarkCorner	DarkCorner	518.544	214.354	3.497226e+000	3.489731e+000	64	29	6.016694e+000	0	0	0	0	0	0	1.50479	0	0	50.1463	28.8438
DATA	345	5	5	66	1	DarkCorner	DarkCorner	543.5	214.5	3.470047e+000	3.460890e+000	63	27	5.254555e+000	0	0	0	0	0	0	1.13429	0	0	65	28.1
DATA	346	5	6	66	1	DarkCorner	DarkCorner	569.076	213.894	3.444241e+000	3.432906e+000	60	29	6.980404e+000	0	0	0	0	0	0	-1.72581	0	0	46.1809	27.8974
DATA	347	5	7	66	1	DarkCorner	DarkCorner	594.258	213.455	3.420377e+000	3.409120e+000	57	28	6.735608e+000	0	0	0	0	0	0	-4.2247	0	0	45.4864	27
DATA	348	5	8	66	1	DarkCorner	DarkCorner	620.027	214.493	3.396933e+000	3.385753e+000	58	29	4.827603e+000	0	0	0	0	0	0	-2.67323	0	0	48.5334	28.0667
DATA	349	5	9	66	1	DarkCorner	DarkCorner	645.088	214.368	3.376163e+000	3.365052e+000	60	31.5	9.111127e+000	0	0	0	0	0	0	-1.4951	0	0	46.1809	30.4333
DATA	350	5	10	0	0	A_43_P17919	XM_001070979	670.6	214.013	4.119138e+001	5.306612e+000	98.5	35.5	1.025093e+001	0	0	0	0	0	0	38.5925	1	1	49.1849	35.4333
DATA	351	5	11	0	0	A_42_P826221	NM_012933	695.5	214.5	6.055544e+003	6.055635e+002	5606	35.5	9.257733e+000	0	0	0	0	0	0	5704.05	1	1	49.1849	35.9091
DATA	352	5	12	0	0	A_64_P011524	NM_001194951	721.107	214.5	7.176525e+002	7.184158e+001	735	30	6.065777e+000	0	0	0	0	0	0	679.429	1	1	56.9804	31.1429
DATA	353	5	13	0	0	A_44_P258417	NM_001009699	746.5	214.5	9.706380e+001	1.025058e+001	153.5	32.5	5.670284e+000	0	0	0	0	0	0	92.3201	1	1	57.5363	32.1786
DATA	354	5	14	0	0	A_64_P164617	A_64_P164617	771.667	214.5	5.692355e+004	5.692356e+003	53565	33	6.683742e+000	0	0	0	0	0	0	54369.6	1	1	57.5363	33.6207
DATA	355	5	15	0	0	A_42_P758933	NM_001106476	797.174	214.464	8.631993e+003	8.632055e+002	7991	33	7.876124e+000	0	0	0	1	0	0	8276.67	1	1	47.2035	32.0333
DATA	356	5	16	0	0	A_42_P573312	NM_001134761	822.486	214.222	6.867898e+002	6.875621e+001	689	30	9.423082e+000	0	0	0	0	0	0	660.79	1	1	47.8731	30.6087
DATA	357	5	17	0	0	A_64_P096257	NM_001160228	848.095	214.878	9.182968e+002	9.188708e+001	933	30	8.449725e+000	0	0	0	0	0	0	886.369	1	1	47.5395	31.7419
DATA	358	5	18	0	0	A_43_P15847	NM_178847	873.418	214.573	1.052104e+002	1.100823e+001	161.5	31	8.453582e+000	0	0	0	0	0	0	101.827	1	1	57.5363	33.0345
DATA	359	5	19	0	0	A_64_P139962	NM_001000675	898.582	214.573	1.520695e+001	3.570979e+000	75	30	1.035352e+001	0	0	0	0	0	0	14.7527	1	0	57.5363	32.6667
DATA	360	5	20	0	0	A_64_P117474	NM_001000646	924.229	214.629	7.496538e+000	3.310364e+000	66	31	1.054617e+001	0	0	0	0	0	0	7.28758	1	0	47.5395	33.4375
DATA	361	5	21	0	1	ERCC-00075_180	ERCC-00075_180	949.609	214.406	3.173825e+001	4.520543e+000	91.5	32	1.073237e+001	0	0	0	0	0	0	30.9047	1	1	47.5395	34.9394
DATA	362	5	22	0	0	A_42_P740730	NM_001012136	974.54	214.571	2.795725e+001	4.260344e+000	90.5	32	6.393886e+000	0	0	0	0	0	0	27.2595	1	1	44.4243	32.1034
DATA	363	5	23	0	0	A_42_P702258	NM_017227	1000.49	215.018	3.763452e+001	4.947292e+000	98	31	7.609788e+000	0	0	0	0	0	0	36.7349	1	1	42.2201	31.1379
DATA	364	5	24	0	0	A_42_P668800	NM_001127553	1025.5	214.735	1.608150e+003	1.608470e+002	1592.5	33	5.131046e+000	0	0	0	0	0	0	1570.72	1	1	46.5243	31.5926
DATA	365	5	25	0	0	A_42_P842513	NM_031077	1051.17	214.549	4.297121e+003	4.297241e+002	4201	33	1.647376e+001	0	0	0	0	0	0	4198.55	1	1	47.5395	37.6667
DATA	366	5	26	0	0	A_64_P047697	NM_001161835	1076.32	214.691	3.734007e+002	3.747761e+001	417	30	8.586485e+000	0	0	0	0	0	0	364.859	1	1	46.5243	32.4857
DATA	367	5	27	0	0	A_42_P660036	NM_001134727	1102	214.545	2.118534e+002	2.142696e+001	256	33	6.217081e+000	0	0	0	1	0	0	206.95	1	1	55.8519	31.2286
DATA	368	5	28	0	0	A_64_P095050	A_64_P095050	1127.5	215	5.660337e+004	5.660338e+003	55597	35	7.869716e+000	0	0	0	0	0	0	55265.2	1	1	54.1152	33.5
DATA	369	5	29	0	0	A_42_P561835	ENSRNOT00000043937	1152.67	214.667	2.245756e+002	2.268627e+001	273.5	27.5	6.643292e+000	0	0	0	0	0	0	219.074	1	1	46.8651	28.9333
DATA	370	5	30	0	0	A_64_P098774	ENSRNOT00000002068	1178.39	214.931	2.482630e+001	4.063401e+000	85	28	5.435426e+000	0	0	0	0	0	0	24.1911	1	1	53.8203	29.1053
DATA	371	5	31	0	0	A_64_P163184	NM_001107855	1203.5	215	5.161657e+002	5.171699e+001	556.5	34	9.192340e+000	0	0	0	0	0	0	502.263	1	1	54.1152	34.4706
DATA	372	5	32	0	0	A_42_P549675	NM_080577	1228.79	214.806	4.293621e+003	4.293742e+002	4076	28.5	6.951474e+000	0	0	0	0	0	0	4170.92	1	1	47.5395	30.2333
DATA	373	5	33	0	0	A_64_P287740	NM_001127601	1254.6	214.647	6.836374e+001	7.562347e+000	125	29.5	6.372509e+000	0	0	0	0	0	0	66.2782	1	1	46.8651	29.6875
DATA	374	5	34	0	0	A_64_P059545	NM_053477	1280.09	214.896	5.327642e+003	5.327741e+002	5197	31	8.905487e+000	0	0	0	0	0	0	5153.92	1	1	46.8651	32
DATA	375	5	35	0	0	A_44_P465856	NM_199398	1305.25	215.044	1.576038e+001	3.610100e+000	76	33	1.012273e+001	0	0	0	0	0	0	15.21	1	0	46.1809	33.6071
DATA	376	5	36	0	0	A_42_P714075	NM_031723	1330.31	215.014	1.069525e+003	1.070021e+002	1067	31	7.537474e+000	0	0	0	0	0	0	1029.46	1	1	47.2035	29.6563
DATA	377	5	37	0	0	A_42_P605265	NM_053677	1356	215	3.151696e+001	4.538751e+000	89	34	7.535601e+000	0	0	0	0	0	0	30.2474	1	1	54.9904	32.2162
DATA	378	5	38	0	0	A_64_P047401	NM_001009369	1381.06	214.687	3.027084e+003	3.027261e+002	2862.5	32	6.565254e+000	0	0	0	0	0	0	2896.11	1	1	45.835	31.7179
DATA	379	5	39	0	0	A_64_P018891	A_64_P018891	1406.5	215	1.094230e+002	1.142535e+001	165	31.5	6.099230e+000	0	0	0	0	0	0	104.345	1	1	54.1152	32.3438
DATA	380	5	40	0	0	A_64_P026297	NM_022583	1432.25	214.855	4.516193e+001	5.592728e+000	102	30.5	6.819597e+000	0	0	0	0	0	0	42.9114	1	1	46.1809	29.9
DATA	381	5	41	0	0	A_43_P13508	NM_001015031	1457.5	215	6.569747e+001	7.356943e+000	120	29	7.054916e+000	0	0	0	0	0	0	62.1942	1	1	54.1152	29.5294
DATA	382	5	42	0	0	A_64_P077426	XM_001080794	1483	214.839	1.394890e+004	1.394894e+003	12550	30	5.593775e+000	0	0	0	0	0	0	13153.1	1	1	51.4001	30.25
DATA	383	5	43	0	0	A_44_P370175	NM_031773	1507.84	215.271	9.434445e+001	1.000729e+001	148	34	9.003360e+000	0	0	0	0	0	0	88.6131	1	1	46.8651	34.3125
DATA	384	5	44	0	0	A_64_P084288	NM_001000496	1533.5	215	1.704855e+001	3.760377e+000	76	33	8.873375e+000	0	0	0	0	0	0	15.9437	1	1	54.1152	32.4333
DATA	385	5	45	0	0	A_44_P400936	A_44_P400936	1559.09	214.899	3.847110e+002	3.861813e+001	419	32	7.667239e+000	0	0	0	0	0	0	358.181	1	1	46.8651	32.0857
DATA	386	5	46	0	0	A_64_P019599	NM_012713	1584.3	214.841	1.691327e+002	1.724808e+001	216	34.5	8.761168e+000	0	0	0	0	0	0	156.758	1	1	46.5243	33.625
DATA	387	5	47	0	0	A_44_P644356	AI556299	1609.61	215.069	2.978806e+001	4.518546e+000	85	27.5	7.103195e+000	0	0	0	0	0	0	27.4809	1	1	53.8203	27.8462
DATA	388	5	48	0	0	A_64_P057076	A_64_P057076	1635.44	214.973	1.350024e+002	1.392531e+001	186	29.5	8.650704e+000	0	0	0	0	0	0	123.936	1	1	48.5334	29.4375
DATA	389	5	49	0	0	A_64_P087392	NM_001108764	1660.56	215.027	1.657936e+002	1.693066e+001	213	33.5	1.101083e+001	0	0	0	0	0	0	151.463	1	1	48.5334	35.0385
DATA	390	5	50	0	0	A_44_P436604	NM_001025627	1686.09	215.065	3.113347e+001	4.645948e+000	90	33	6.257016e+000	0	0	0	0	0	0	28.2988	1	1	65	31.6897
DATA	391	5	51	0	0	A_43_P23200	NM_001107832	1711.44	215.028	4.558513e+002	4.571672e+001	460	25	7.723738e+000	0	0	0	0	0	0	412.225	1	1	48.2044	27.7391
DATA	392	5	52	0	0	A_42_P515876	NM_031097	1736.7	215.1	7.081315e+002	7.089882e+001	683	29	8.338444e+000	0	0	0	0	0	0	637.048	1	1	47.2035	31.5652
DATA	393	5	53	0	0	A_44_P1047924	NM_053523	1762.17	214.677	4.092708e+003	4.092858e+002	3572	30.5	7.734435e+000	0	0	0	0	0	0	3662.07	1	1	45.4864	31.4474
DATA	394	5	54	0	0	A_44_P682668	NM_001014228	1787.62	215.048	1.452521e+002	1.494605e+001	189	36	1.004350e+001	0	0	0	0	0	0	129.279	1	1	44.0646	34.1111
DATA	395	5	55	0	0	A_64_P061489	NM_001108746	1813	215.455	1.881809e+001	4.009660e+000	73.5	32	6.371285e+000	0	0	0	0	0	0	16.6594	1	1	55.8519	32.7714
DATA	396	5	56	0	0	A_64_P047747	NM_182474	1838.71	214.833	2.253239e+003	2.253520e+002	2020	27.5	8.775881e+000	0	0	0	0	0	0	1983.51	1	1	45.835	28.5333
DATA	397	5	57	0	0	A_64_P091163	NM_001107083	1863.58	215.427	4.338570e+001	5.624640e+000	95.5	30	8.191866e+000	0	0	0	0	0	0	37.9911	1	1	57.5363	30.76
DATA	398	5	58	0	0	A_64_P133992	NM_001008825	1889.42	215.427	1.225509e+002	1.277284e+001	164.5	29	6.601767e+000	0	0	0	0	0	0	106.711	1	1	57.5363	31.8
DATA	399	5	59	0	0	A_42_P503768	NM_001009466	1914.58	215.427	3.939261e+002	3.955856e+001	382	29	7.742079e+000	0	0	0	0	0	0	341.132	1	1	57.5363	30.1613
DATA	400	5	60	0	0	A_44_P400346	ENSRNOT00000059540	1940	215.455	6.705055e+001	7.629236e+000	116	34	8.725600e+000	0	0	0	0	0	0	57.7434	1	1	55.8519	33.1563
DATA	401	5	61	0	0	A_64_P128438	NM_012591	1965.24	214.794	2.645206e+003	2.645460e+002	2240	35	1.041326e+001	0	0	0	0	0	0	2265.24	1	1	46.1809	33.6897
DATA	402	5	62	0	0	A_44_P531758	NM_012935	1990.7	215.1	2.462871e+004	2.462873e+003	20653	32	9.012380e+000	0	0	0	0	0	0	20976	1	1	47.2035	31.8667
DATA	403	5	63	0	0	A_43_P10257	NM_203335	2015.96	215.139	7.019165e+003	7.019262e+002	5709	32	6.442188e+000	0	0	0	0	0	0	5945.69	1	1	46.8651	31.7941
DATA	404	5	64	0	0	A_64_P011744	NM_001108789	2041.8	215.169	3.692370e+002	3.711071e+001	361	29	6.296611e+000	0	0	0	0	0	0	311.045	1	1	47.5395	29.2258
DATA	405	5	65	0	0	A_44_P282794	NM_001107523	2067	215.455	3.897019e+001	5.401734e+000	91.5	28	7.372596e+000	0	0	0	0	0	0	32.6558	1	1	65	29.7
DATA	406	5	66	0	0	A_42_P463784	NM_001008526	2092.57	215.392	1.423818e+003	1.424315e+002	1250.5	31	5.757792e+000	0	0	0	1	0	0	1186.74	1	1	49.1849	30.25
DATA	407	5	67	0	0	A_42_P630463	NM_022238	2117.53	215.421	3.872623e+002	3.891028e+001	378	31	7.421126e+000	0	0	0	0	0	0	321.127	1	1	49.8279	31.8387
DATA	408	5	68	0	0	A_64_P006728	NM_001108905	2142.93	215.507	3.046040e+003	3.046277e+002	2511.5	30	7.976640e+000	0	0	0	0	0	0	2512.95	1	1	48.5334	31.6296
DATA	409	5	69	0	0	A_44_P360629	NM_001000030	2168.67	215.101	7.685616e+001	8.582248e+000	120	29	6.554158e+000	0	0	0	0	0	0	63.0773	1	1	46.5243	30.0968
DATA	410	5	70	0	0	A_64_P024620	NM_001006995	2193.71	214.833	2.257300e+004	2.257303e+003	18024	33	8.211589e+000	0	0	0	0	0	0	18435.4	1	1	45.835	31.7407
DATA	411	5	71	0	0	A_64_P091194	ENSRNOT00000049254	2219.42	214.894	1.250031e+004	1.250037e+003	10157.5	30	8.562625e+000	0	0	0	0	0	0	10159.8	1	1	45.4864	31.6875
DATA	412	5	72	0	0	A_44_P334922	NM_022379	2244.58	215.427	1.582209e+001	4.184514e+000	69	27	7.094907e+000	0	0	0	0	0	0	12.8023	1	0	57.5363	27.2813
DATA	413	5	73	0	0	A_42_P482051	XM_001059157	2270.11	215.5	1.394587e+003	1.395130e+002	1147.5	30	1.008974e+001	0	0	0	1	0	0	1123.36	1	1	56.9804	31.6071
DATA	414	5	74	0	0	A_42_P674742	XM_002726367	2295.59	215.247	8.777313e+003	8.777400e+002	7094	34	1.138884e+001	0	0	0	0	0	0	7039.27	1	1	48.5334	34.1875
DATA	415	5	75	0	0	A_64_P105211	XM_233310	2320.89	215.5	3.490273e+001	5.251873e+000	84	29	8.373345e+000	0	0	0	0	0	0	27.8781	1	1	65	30.625
DATA	416	5	76	0	0	A_64_P058523	NM_134385	2346.33	215.5	1.196367e+001	4.117459e+000	67	29.5	7.313103e+000	0	0	0	0	0	0	9.5182	1	0	57.5363	30
DATA	417	5	77	0	0	A_44_P586876	NM_001100805	2371.63	215.36	1.666446e+003	1.666915e+002	1331	27	6.760595e+000	0	0	0	0	0	0	1320.85	1	1	48.8603	27.6875
DATA	418	5	78	66	1	DarkCorner	DarkCorner	2397.48	215.646	3.981588e+000	3.968484e+000	55	28	6.259750e+000	0	0	0	0	0	0	-0.714222	0	0	51.7088	28.0938
DATA	419	5	79	66	1	DarkCorner	DarkCorner	2422.66	215.616	3.994553e+000	3.981406e+000	53	28	5.382094e+000	0	0	0	0	0	0	-3.06069	0	0	48.5334	26.8214
DATA	420	5	80	66	1	DarkCorner	DarkCorner	2447.67	215.5	4.006588e+000	3.993402e+000	56	30	6.890925e+000	0	0	0	0	0	0	-0.377361	0	0	57.5363	29.7879
DATA	421	5	81	66	1	DarkCorner	DarkCorner	2473.57	215.853	4.017530e+000	4.004307e+000	56	26	7.298019e+000	0	0	0	0	0	0	-0.556302	0	0	47.2035	27.2414
DATA	422	5	82	66	1	DarkCorner	DarkCorner	2498.58	215.573	4.027659e+000	4.021991e+000	59	28	6.902547e+000	0	0	0	0	0	0	1.92813	0	0	57.5363	26.6129
DATA	423	5	83	66	1	DarkCorner	DarkCorner	2524.34	216.234	5.685465e+000	4.062637e+000	62	28	5.682411e+000	0	0	0	0	0	0	4.43016	1	0	48.8603	27.6486
DATA	424	5	84	66	1	DarkCorner	DarkCorner	2549.42	216.141	4.043570e+000	4.043899e+000	60	33	7.196837e+000	0	0	0	0	0	0	2.5807	0	0	49.5074	33.3913
DATA	425	5	85	66	1	DarkCorner	DarkCorner	2574.67	215.5	6.103966e+000	4.083121e+000	62	31.5	7.967122e+000	0	0	0	0	0	0	4.73909	1	0	57.5363	30.8095
DATA	426	6	1	66	1	DarkCorner	DarkCorner	454.413	221.813	1.075688e+001	3.718030e+000	70.5	32	8.612418e+000	0	0	0	0	0	0	9.47376	1	0	48.5334	30.6889
DATA	427	6	2	66	1	DarkCorner	DarkCorner	480.145	221.904	5.858808e+000	3.575063e+000	66	33	8.222461e+000	0	0	0	0	0	0	5.2072	1	0	49.8279	33.4375
DATA	428	6	3	66	1	DarkCorner	DarkCorner	505.456	221.772	3.508442e+000	3.496895e+000	62	32	7.747849e+000	0	0	0	0	0	0	-1.0719	0	0	49.5074	32.3947
DATA	429	6	4	66	1	DarkCorner	DarkCorner	530.5	222	3.480376e+000	3.470012e+000	62.5	28.5	5.877680e+000	0	0	0	0	0	0	0.785931	0	0	54.1152	29.9333
DATA	430	6	5	66	1	DarkCorner	DarkCorner	556	222	3.453626e+000	3.442259e+000	58	28	6.249966e+000	0	0	0	0	0	0	-2.2751	0	0	54.9904	28.2
DATA	431	6	6	66	1	DarkCorner	DarkCorner	581.859	221.831	3.428284e+000	3.417001e+000	59.5	27	7.293128e+000	0	0	0	0	0	0	-2.54691	0	0	46.8651	27.2083
DATA	432	6	7	66	1	DarkCorner	DarkCorner	606.903	221.764	3.405288e+000	3.394080e+000	54	29	7.324216e+000	0	0	0	0	0	0	-5.181	0	0	47.5395	28.4595
DATA	433	6	8	66	1	DarkCorner	DarkCorner	632.693	221.8	3.383150e+000	3.372016e+000	62.5	33.5	8.423830e+000	0	0	0	0	0	0	-0.0591454	0	0	48.5334	32.9333
DATA	434	6	9	0	0	A_64_P034324	NM_001108282	657.789	221.916	8.379185e+001	9.024785e+000	141	34	9.393203e+000	0	0	0	0	0	0	78.3543	1	1	46.8651	32.9677
DATA	435	6	10	0	0	A_64_P071506	ENSRNOT00000025007	683	222	3.261475e+001	4.663547e+000	93	35	8.104612e+000	0	0	0	0	0	0	30.6687	1	1	54.9904	34.4483
DATA	436	6	11	0	0	A_64_P050705	NM_001106061	708.296	221.972	1.366306e+002	1.405973e+001	189	32.5	6.288479e+000	0	0	0	0	0	0	129.146	1	1	47.5395	32.7143
DATA	437	6	12	0	0	A_64_P032242	NM_001008898	733.493	221.859	1.276074e+001	3.538504e+000	72.5	30	5.201854e+000	0	0	0	0	0	0	12.1193	1	0	47.8731	31.1739
DATA	438	6	13	0	0	A_42_P730320	NM_001013877	759.392	222.069	5.728637e+001	6.603911e+000	117	34	6.584831e+000	0	0	0	0	0	0	54.6537	1	1	53.8203	31.88
DATA	439	6	14	0	0	A_64_P123073	A_64_P123073	784.521	221.904	3.890944e+002	3.904681e+001	434	37	1.091679e+001	0	0	0	0	0	0	372.691	1	1	48.5334	37.7188
DATA	440	6	15	0	0	A_64_P064709	NM_001166303	809.931	221.806	1.040539e+002	1.090427e+001	160	31	6.392345e+000	0	0	0	0	0	0	100.032	1	1	46.8651	29.1724
DATA	441	6	16	0	0	A_44_P123381	NM_013012	835.254	221.716	1.755800e+001	3.693868e+000	78.5	27.5	7.386084e+000	0	0	0	0	0	0	16.9345	1	1	45.4864	29.4643
DATA	442	6	17	0	0	A_44_P557487	NM_053617	860.5	222	2.253764e+001	3.947086e+000	81	32.5	7.671488e+000	0	0	0	0	0	0	21.8012	1	1	54.1152	32.1
DATA	443	6	18	0	0	A_64_P084971	NM_017007	886.392	222.069	4.893626e+004	4.893627e+003	46761	31	9.525827e+000	0	0	0	0	0	0	47461.1	1	1	53.8203	33.2069
DATA	444	6	19	0	0	A_42_P770556	NM_033096	911.208	222.194	6.934285e+003	6.934360e+002	6675	31	8.940231e+000	0	0	0	0	0	0	6739.83	1	1	47.5395	33.1143
DATA	445	6	20	0	0	A_64_P023381	XM_001073278	936.912	222.386	6.057928e+001	6.859973e+000	116.5	35	1.003749e+001	0	0	0	0	0	0	58.9923	1	1	57.259	36.1143
DATA	446	6	21	0	0	A_64_P059217	NM_053667	962.418	222.427	2.857477e+002	2.875494e+001	336	36.5	1.072243e+001	0	0	0	0	0	0	278.686	1	1	57.5363	37.3824
DATA	447	6	22	0	0	A_44_P286215	NM_001008885	987.639	221.944	1.896249e+002	1.923233e+001	249	32	7.637485e+000	0	0	0	0	0	0	185.145	1	1	48.5334	31.7419
DATA	448	6	23	0	0	A_64_P138056	A_64_P138056	1013	221.774	5.324050e+002	5.333704e+001	566	30	5.982223e+000	0	0	0	0	0	0	520.257	1	1	45.4864	29.9706
DATA	449	6	24	0	0	A_44_P280799	NM_001000654	1038.5	222.352	2.068957e+001	3.815446e+000	81	33	8.486097e+000	0	0	0	0	0	0	20.2294	1	1	57.5363	32.4231
DATA	450	6	25	0	0	A_64_P111599	NM_001191586	1063.57	221.71	5.534028e+002	5.543303e+001	598	33	9.566979e+000	0	0	0	0	0	0	541.17	1	1	46.8651	34.2069
DATA	451	6	26	0	0	A_64_P088635	ENSRNOT00000059643	1089.42	222.427	2.799518e+001	4.255812e+000	88	29.5	6.787711e+000	0	0	0	0	0	0	27.3758	1	1	57.5363	30.6111
DATA	452	6	27	0	0	A_64_P042332	NM_021860	1114.58	222.427	1.763618e+001	3.659662e+000	79	34	6.160443e+000	0	0	0	0	0	0	17.2392	1	1	57.5363	31.6071
DATA	453	6	28	0	0	A_42_P599080	NM_053753	1140	222.455	9.160886e+001	9.706637e+000	150	32.5	7.631906e+000	0	0	0	0	0	0	89.4848	1	1	55.8519	32.7647
DATA	454	6	29	0	0	A_44_P576954	NM_001106645	1165.47	222.139	5.414779e+002	5.424298e+001	566.5	27	5.133874e+000	0	0	0	0	0	0	528.385	1	1	47.8731	28.24
DATA	455	6	30	0	0	A_64_P046687	A_64_P046687	1190.58	221.841	5.367019e+003	5.367116e+002	5177	34	8.434623e+000	0	0	0	0	0	0	5230.55	1	1	47.2035	34.5714
DATA	456	6	31	0	0	A_42_P694928	NM_001109046	1216.15	221.862	2.603102e+002	2.622957e+001	310	34	9.848515e+000	0	0	0	0	0	0	253.302	1	1	45.835	34.1795
DATA	457	6	32	0	0	A_64_P032811	NM_001134575	1241.57	222.147	6.819172e+001	7.544134e+000	129	30	5.335784e+000	0	0	0	0	0	0	66.239	1	1	47.2035	29.8824
DATA	458	6	33	0	0	A_64_P141070	ENSRNOT00000058701	1267.26	222.242	8.058149e+001	8.682721e+000	138.5	30	8.606199e+000	0	0	0	0	0	0	78.1127	1	1	45.1352	31
DATA	459	6	34	0	0	A_64_P093462	NM_001108129	1292.44	222.26	1.896240e+004	1.896242e+003	17590	33	6.395056e+000	0	0	0	0	0	0	18339.6	1	1	49.5074	32.875
DATA	460	6	35	0	0	A_42_P799306	ENSRNOT00000015782	1317.67	222.5	5.860196e+001	6.700590e+000	116	31	8.259944e+000	0	0	0	0	0	0	56.5365	1	1	57.5363	29.68
DATA	461	6	36	0	0	A_42_P726743	NM_001108985	1343	222.271	1.161395e+003	1.161852e+002	1162	33	8.251217e+000	0	0	0	0	0	0	1117.34	1	1	46.8651	31.027
DATA	462	6	37	0	0	A_44_P228341	NM_001025701	1368.08	221.762	2.728112e+003	2.728308e+002	2537.5	32	7.491508e+000	0	0	0	0	0	0	2616.73	1	1	45.4864	32.2286
DATA	463	6	38	0	0	A_42_P571433	NM_031059	1394.07	222.214	3.316159e+003	3.316321e+002	3123.5	31	7.556356e+000	0	0	0	0	0	0	3170.54	1	1	46.8651	32.5128
DATA	464	6	39	0	0	A_44_P132783	NM_214833	1419.5	222.5	1.061130e+002	1.110949e+001	160	35	7.743263e+000	0	0	0	0	0	0	101.111	1	1	57.5363	36.3793
DATA	465	6	40	0	0	A_44_P119215	NM_001108941	1444.67	222.5	4.587238e+001	5.651677e+000	102	32	8.820671e+000	0	0	0	0	0	0	43.5543	1	1	57.5363	32.2143
DATA	466	6	41	0	0	A_44_P124259	XM_345871	1470.33	222.5	2.804937e+001	4.341693e+000	87.5	29.5	6.519202e+000	0	0	0	0	0	0	26.53	1	1	65	29.375
DATA	467	6	42	0	0	A_44_P422063	NM_001107631	1495.38	222.351	1.419944e+002	1.458402e+001	191	35	8.200278e+000	0	0	0	0	0	0	133.775	1	1	49.8279	36.125
DATA	468	6	43	0	0	A_44_P1033023	NM_013063	1520.58	222.662	7.454683e+003	7.454758e+002	6657.5	33.5	8.897766e+000	0	0	0	0	0	0	6994.65	1	1	49.8279	32.7353
DATA	469	6	44	0	0	A_64_P121618	NM_001134542	1546.12	222.5	2.673825e+002	2.694794e+001	316.5	34.5	7.886289e+000	0	0	0	0	0	0	249.793	1	1	47.2035	33.5
DATA	470	6	45	0	0	A_64_P042188	ENSRNOT00000034890	1571.74	222.286	7.968102e+003	7.968173e+002	7427	35	8.665707e+000	0	0	0	0	0	0	7410.31	1	1	46.8651	33.7647
DATA	471	6	46	0	0	A_42_P561616	AI234869	1597.35	222.419	9.616281e+002	9.622240e+001	912	34	8.091007e+000	0	0	0	0	0	0	890.192	1	1	48.5334	34.1852
DATA	472	6	47	0	0	A_42_P588606	NM_001134544	1622.5	222.5	2.057126e+002	2.085065e+001	246.5	30	7.653612e+000	0	0	0	0	0	0	189.543	1	1	57.5363	30.2222
DATA	473	6	48	0	0	A_42_P568897	NM_001005563	1648.17	222.44	6.101316e+002	6.110886e+001	613	34	1.049924e+001	0	0	0	0	0	0	559.418	1	1	49.1849	33.6552
DATA	474	6	49	0	0	A_64_P096356	NM_012640	1673.25	222.373	3.096964e+004	3.096966e+003	27598.5	33.5	9.870890e+000	0	0	0	0	0	0	28256.3	1	1	49.1849	34.2813
DATA	475	6	50	0	0	A_64_P006418	A_64_P006418	1698.51	222.573	5.903620e+003	5.903721e+002	5588	26	9.096902e+000	0	0	0	0	0	0	5359.49	1	1	49.1849	29.3333
DATA	476	6	51	0	0	A_64_P156389	A_64_P156389	1724.36	222.623	7.158220e+001	7.955321e+000	127	28.5	1.099930e+001	0	0	0	0	0	0	64.6446	1	1	47.8731	31.7692
DATA	477	6	52	0	0	A_42_P576446	NM_001107673	1749.25	222.5	9.563292e+003	9.563355e+002	8015	31	7.826753e+000	0	0	0	0	0	0	8592	1	1	48.5334	32.5161
DATA	478	6	53	0	0	A_64_P022804	A_64_P022804	1775.12	222.377	1.570416e+003	1.570808e+002	1435.5	31	8.431754e+000	0	0	0	0	0	0	1403.27	1	1	49.8279	31.7647
DATA	479	6	54	0	0	A_64_P162356	A_64_P162356	1800.06	222.618	1.136206e+004	1.136211e+003	9747.5	31.5	7.569270e+000	0	0	0	0	0	0	10099.7	1	1	46.1809	32.5769
DATA	480	6	55	0	0	A_44_P266776	NM_199388	1825.61	222.5	7.744556e+002	7.752668e+001	715	31	7.769256e+000	0	0	0	0	0	0	684.651	1	1	48.5334	31.8571
DATA	481	6	56	0	0	A_64_P035066	NM_001008960	1851.11	222.5	1.227712e+001	3.770617e+000	72	25.5	6.945420e+000	0	0	0	0	0	0	10.7941	1	0	56.9804	26.9412
DATA	482	6	57	0	0	A_64_P072728	NM_001100667	1876.03	222.864	7.633365e+003	7.633449e+002	6572	30	7.012809e+000	0	0	0	0	0	0	6675.65	1	1	46.5243	31.8889
DATA	483	6	58	0	0	A_64_P028446	NM_001106007	1901.6	222.853	2.631547e+003	2.631793e+002	2268	29.5	7.382879e+000	0	0	0	0	0	0	2288.64	1	1	48.8603	31.9
DATA	484	6	59	0	0	A_44_P251212	NM_031715	1927.42	222.573	4.165944e+004	4.165945e+003	34650	30	7.913357e+000	0	0	0	0	0	0	36026.2	1	1	57.5363	31.6061
DATA	485	6	60	0	0	A_42_P818240	NM_001108334	1952.44	222.734	1.292519e+004	1.292524e+003	10806	33	1.159015e+001	0	0	0	0	0	0	11117.2	1	1	50.7771	33.375
DATA	486	6	61	0	0	A_64_P023122	NM_001080208	1978	222.545	2.403621e+001	4.382559e+000	80	29.5	9.517175e+000	0	0	0	0	0	0	20.5591	1	1	55.8519	29.9375
DATA	487	6	62	0	0	A_44_P217821	NM_001107292	2003.46	222.486	3.707428e+002	3.725695e+001	374	33	8.085830e+000	0	0	0	0	0	0	315.371	1	1	48.8603	33.2258
DATA	488	6	63	0	0	A_64_P007372	NM_001105895	2028.58	222.573	1.620380e+001	4.043500e+000	71	28.5	7.269698e+000	0	0	0	0	0	0	13.71	1	0	57.5363	27.4474
DATA	489	6	64	0	0	A_42_P792382	NM_017257	2054.12	222.616	8.157893e+003	8.157978e+002	6683	29	8.499827e+000	0	0	0	0	0	0	6865.18	1	1	48.5334	31.6
DATA	490	6	65	0	0	A_43_P12232	NM_022512	2079.63	222.64	1.966028e+003	1.966384e+002	1649.5	30	6.779061e+000	0	0	0	0	0	0	1645.68	1	1	48.8603	31.2069
DATA	491	6	66	0	0	A_64_P158475	A_64_P158475	2104.92	222.959	8.609295e+003	8.609377e+002	7067.5	32	6.972677e+000	0	0	0	0	0	0	7169.4	1	1	46.8651	32.2414
DATA	492	6	67	0	0	A_64_P043361	NM_001197023	2130.5	222.648	1.112893e+002	1.175461e+001	145.5	30	6.695663e+000	0	0	0	0	0	0	92.1894	1	1	57.5363	31.2963
DATA	493	6	68	0	0	A_64_P080851	NM_001105753	2155.58	222.573	3.114395e+001	4.915461e+000	84	29.5	6.155823e+000	0	0	0	0	0	0	25.6698	1	1	57.5363	30.0938
DATA	494	6	69	0	0	A_44_P129330	NM_001107505	2181.25	222.699	1.312142e+003	1.312698e+002	1106	30	5.806961e+000	0	0	0	0	0	0	1076.14	1	1	47.5395	29.4815
DATA	495	6	70	0	0	A_64_P008827	NM_001014012	2206.53	222.836	2.500806e+003	2.501101e+002	2050	30	7.663810e+000	0	0	0	0	0	0	2041.23	1	1	47.8731	29.6552
DATA	496	6	71	0	0	A_64_P026222	NM_001101019	2232	223	6.194336e+001	7.297624e+000	107	28.5	7.037916e+000	0	0	0	0	0	0	50.3245	1	1	54.9904	28.375
DATA	497	6	72	0	0	A_64_P067749	NM_012659	2257.5	223	4.677436e+004	4.677438e+003	38039	28	7.658013e+000	0	0	0	0	0	0	37827.8	1	1	54.1152	27.6129
DATA	498	6	73	0	0	A_44_P362981	NM_145878	2282.5	223	4.069616e+004	4.069618e+003	32027.5	28.5	1.261009e+001	0	0	0	0	0	0	32770.5	1	1	54.1152	32.8333
DATA	499	6	74	0	0	A_64_P146654	NM_031698	2308.44	222.973	2.631106e+003	2.631396e+002	2149	32	9.625459e+000	0	0	0	0	0	0	2109.59	1	1	48.5334	33.129
DATA	500	6	75	0	0	A_42_P548800	NM_001007696	2333.75	223	6.110903e+003	6.111029e+002	4852	28	5.843981e+000	0	0	0	0	0	0	4880.1	1	1	49.1849	28.1786
DATA	501	6	76	0	0	A_44_P310581	BG673348	2359.09	222.918	3.970433e+003	3.970629e+002	3239	32	6.272161e+000	0	0	0	0	0	0	3158.62	1	1	51.0895	31.44
DATA	502	6	77	0	0	A_64_P062269	XM_001067531	2384.31	222.972	2.341845e+002	2.374993e+001	246	30.5	7.139664e+000	0	0	0	0	0	0	185.639	1	1	47.2035	29.8438
DATA	503	6	78	66	1	DarkCorner	DarkCorner	2409.5	223	3.980533e+000	3.969917e+000	56	28	5.661444e+000	0	0	0	0	0	0	1.10967	0	0	54.1152	27.3636
DATA	504	6	79	66	1	DarkCorner	DarkCorner	2435.24	222.838	3.993379e+000	3.980936e+000	57	29	6.601239e+000	0	0	0	0	0	0	0.588143	0	0	48.2044	27.8276
DATA	505	6	80	66	1	DarkCorner	DarkCorner	2460.38	223.118	4.004507e+000	3.991328e+000	52	28	5.604585e+000	0	0	0	0	0	0	-4.42657	0	0	49.1849	28.1786
DATA	506	6	81	66	1	DarkCorner	DarkCorner	2486.38	223.132	4.015217e+000	4.006158e+000	58	29	6.648427e+000	0	0	0	0	0	0	1.42889	0	0	46.5243	27.2609
DATA	507	6	82	66	1	DarkCorner	DarkCorner	2510.9	223.164	4.024232e+000	4.019103e+000	59	30	7.481196e+000	0	0	0	0	0	0	1.99485	0	0	47.2035	28.5909
DATA	508	6	83	66	1	DarkCorner	DarkCorner	2536.95	223.187	4.032619e+000	4.019347e+000	57	28.5	4.220164e+000	0	0	0	0	0	0	-0.411277	0	0	47.8731	28.625
DATA	509	6	84	66	1	DarkCorner	DarkCorner	2562.39	223.069	6.754934e+000	4.082675e+000	62.5	35	8.405196e+000	0	0	0	0	0	0	5.2586	1	0	53.8203	36.2258
DATA	510	6	85	66	1	DarkCorner	DarkCorner	2587.76	222.851	1.441613e+001	4.282205e+000	67	25	7.110313e+000	0	0	0	0	0	0	11.2065	1	0	48.2044	26.0802
DATA	511	7	1	66	1	DarkCorner	DarkCorner	441.595	228.905	1.366044e+001	3.824266e+000	72	28	7.102811e+000	0	0	0	1	0	0	11.9874	1	0	48.8603	27.9439
DATA	512	7	2	66	1	DarkCorner	DarkCorner	467.568	229.041	4.476904e+000	3.566756e+000	64.5	35	7.389128e+000	0	0	0	0	0	0	3.9657	1	0	48.8603	34.0278
DATA	513	7	3	66	1	DarkCorner	DarkCorner	492.883	229.333	7.794911e+000	3.593314e+000	70	32	7.583797e+000	0	0	0	0	0	0	6.96546	1	0	43.7019	32.2258
DATA	514	7	4	66	1	DarkCorner	DarkCorner	518.169	229.455	3.490329e+000	3.478841e+000	58	30.5	7.969637e+000	0	0	0	0	0	0	-3.0826	0	0	49.8279	32.0313
DATA	515	7	5	66	1	DarkCorner	DarkCorner	544.115	229.295	3.462484e+000	3.451089e+000	60	29	6.832082e+000	0	0	0	0	0	0	-1.47191	0	0	49.8279	30.0345
DATA	516	7	6	66	1	DarkCorner	DarkCorner	568.623	228.883	3.437903e+000	3.426588e+000	57	28.5	6.946066e+000	0	0	0	0	0	0	-2.00791	0	0	49.1849	28.587
DATA	517	7	7	66	1	DarkCorner	DarkCorner	595.147	228.912	3.412786e+000	3.401554e+000	61	27	7.216004e+000	0	0	0	0	0	0	-1.67183	0	0	46.8651	27.4444
DATA	518	7	8	66	1	DarkCorner	DarkCorner	619.5	229.352	3.391069e+000	3.380410e+000	60	29	7.675211e+000	0	0	0	0	0	0	0.54028	0	0	57.5363	32.1379
DATA	519	7	9	0	0	A_64_P051297	NM_001107416	644.941	229.382	4.596966e+003	4.597088e+002	4461.5	31	7.931200e+000	0	0	0	0	0	0	4289.73	1	1	46.1809	30.7586
DATA	520	7	10	0	0	A_64_P162378	A_64_P162378	670.418	229.427	6.002770e+004	6.002771e+003	56171	34	1.044185e+001	0	0	0	0	0	0	56342.4	1	1	57.5363	35.0323
DATA	521	7	11	0	0	A_64_P030634	ENSRNOT00000042606	695.7	229.1	1.250414e+002	1.293784e+001	179	35	6.582806e+000	0	0	0	0	0	0	117.991	1	1	47.2035	35
DATA	522	7	12	0	0	A_64_P110009	NM_024392	721.139	229.278	9.915645e+003	9.915701e+002	9160	31	6.139591e+000	0	0	0	0	0	0	9403.67	1	1	47.8731	32.1379
DATA	523	7	13	0	0	A_42_P618145	NM_001080783	746.435	228.768	4.202796e+003	4.202925e+002	4015	30	5.097622e+000	0	0	0	0	0	0	4003.87	1	1	46.8651	30.2963
DATA	525	7	15	0	0	A_64_P101770	NM_001000074	797.418	229.427	1.612314e+001	3.640048e+000	74.5	33	9.253518e+000	0	0	0	0	0	0	15.4858	1	0	57.5363	33.4
DATA	526	7	16	0	0	A_42_P735934	NM_001105729	822.5	228.948	3.151639e+003	3.151807e+002	3218.5	28	6.669047e+000	0	0	0	0	0	0	3037.26	1	1	42.9674	29.4286
DATA	528	7	18	0	0	A_42_P718331	NM_133522	873.568	229.392	1.869809e+003	1.870089e+002	1860	32	8.525553e+000	0	0	0	0	0	0	1812.63	1	1	49.1849	32.7333
DATA	529	7	19	0	0	A_64_P118054	NM_001037651	898.667	229.5	3.103882e+001	4.476557e+000	93.5	32.5	8.131326e+000	0	0	0	0	0	0	30.1607	1	1	65	34.0385
DATA	530	7	20	0	0	A_64_P044613	A_64_P044613	924.418	229.427	7.122738e+004	7.122739e+003	70789	33.5	1.058024e+001	0	0	0	0	0	0	69353.9	1	1	57.5363	34.7
DATA	531	7	21	0	0	A_43_P13241	NM_134334	949.5	229.5	2.721107e+004	2.721109e+003	26234	35	1.049143e+001	0	0	0	0	0	0	26539.6	1	1	52.9257	36.4848
DATA	532	7	22	0	0	A_44_P524748	NM_001000712	975	229.455	2.164410e+001	3.871100e+000	81	38	9.690316e+000	0	0	0	0	0	0	21.1384	1	1	55.8519	37.9688
DATA	533	7	23	0	0	A_64_P126797	ENSRNOT00000048363	1000.39	229.457	1.046104e+002	1.094135e+001	166	31.5	8.118566e+000	0	0	0	0	0	0	102.27	1	1	47.5395	32.4444
DATA	535	7	25	0	0	A_42_P730411	NM_001012181	1050.99	229.31	7.820821e+002	7.827377e+001	824	33	7.720774e+000	0	0	0	0	0	0	765.38	1	1	47.2035	32.1
DATA	536	7	26	0	0	A_64_P049501	NM_001047970	1076.27	229.119	5.510122e+001	6.373310e+000	115	34	9.678913e+000	0	0	0	0	0	0	53.9268	1	1	45.835	33.6842
DATA	537	7	27	0	0	A_42_P623688	NM_031031	1101.85	229.288	6.664371e+003	6.664448e+002	6237	34	5.466648e+000	0	0	0	0	0	0	6520.87	1	1	48.2044	31.7931
DATA	538	7	28	0	0	A_42_P601217	NM_053460	1127.03	229.443	1.706701e+002	1.736536e+001	227	34	8.602325e+000	0	0	0	0	0	0	166.909	1	1	47.8731	33
DATA	540	7	30	0	0	A_42_P791872	NM_001135174	1177.84	229.118	8.374746e+003	8.374807e+002	7804.5	31	1.112335e+001	0	0	0	0	0	0	8174.08	1	1	46.5243	32.1071
DATA	542	7	32	0	0	A_44_P557172	NM_177936	1228.89	229.5	6.569326e+001	7.316522e+000	126	31	9.488171e+000	0	0	0	0	0	0	63.927	1	1	56.9804	32.5556
DATA	543	7	33	0	0	A_64_P118812	NM_001000512	1254.42	229.573	1.515218e+001	3.565255e+000	76	28.5	6.146242e+000	0	0	0	0	0	0	14.7167	1	0	65	29.2647
DATA	544	7	34	0	0	A_64_P019425	NM_172035	1279.61	229.582	2.124332e+002	2.148810e+001	266	33	7.870588e+000	0	0	0	0	0	0	205.886	1	1	50.4627	34.1154
DATA	545	7	35	0	0	A_42_P726743	NM_001108985	1305.2	229.6	1.218935e+003	1.219366e+002	1203.5	34	1.286399e+001	0	0	0	0	0	0	1178.51	1	1	49.1849	35.8696
DATA	546	7	36	0	0	A_42_P558703	NM_001106810	1330.56	229.466	6.537132e+002	6.545208e+001	682.5	32.5	6.962850e+000	0	0	0	0	0	0	630.362	1	1	49.1849	32.0588
DATA	547	7	37	0	0	A_42_P619806	TC590118	1355.89	229.5	5.270629e+002	5.280701e+001	551.5	32	8.118633e+000	0	0	0	0	0	0	506.788	1	1	56.9804	31.7073
DATA	548	7	38	0	0	A_64_P072247	XM_001055615	1381.57	229.333	7.058908e+001	7.779587e+000	135	30	8.119895e+000	0	0	0	0	0	0	67.661	1	1	44.4243	31.625
DATA	549	7	39	0	0	A_64_P104164	A_64_P104164	1406.58	229.573	2.825688e+004	2.825690e+003	28229	33.5	6.506305e+000	0	0	0	0	0	0	26998	1	1	57.5363	33.4643
DATA	550	7	40	0	0	A_42_P672103	NM_021770	1432.13	229.386	1.816117e+004	1.816120e+003	16857	35	8.629340e+000	0	0	0	0	0	0	17290.8	1	1	51.4001	34.5862
DATA	551	7	41	0	0	A_64_P090942	NM_001000406	1457.54	229.217	2.000515e+001	3.862876e+000	78	31	7.695173e+000	0	0	0	0	0	0	18.9759	1	1	46.8651	31.2353
DATA	552	7	42	0	0	A_64_P149491	ENSRNOT00000025458	1482.67	229.671	8.127650e+001	8.778435e+000	133	35	7.810565e+000	0	0	0	0	0	0	76.8053	1	1	48.2044	34.1724
DATA	553	7	43	0	0	A_42_P552441	NR_002704	1508.31	229.662	1.917828e+004	1.917831e+003	17639	32	1.005220e+001	0	0	0	0	0	0	18049.5	1	1	48.5334	31.7586
DATA	554	7	44	0	0	A_64_P060419	ENSRNOT00000055060	1533.58	229.573	8.447519e+000	3.449560e+000	69	32	8.188863e+000	0	0	0	0	0	0	7.91701	1	0	65	33.3333
DATA	555	7	45	0	0	A_44_P161233	NM_019165	1559.04	229.507	9.116850e+002	9.123036e+001	886	32	7.646606e+000	0	0	0	0	0	0	850.696	1	1	48.2044	32.1176
DATA	556	7	46	66	-1	(-)3xSLv1	NegativeControl	1584.5	229.648	3.385491e+000	3.374348e+000	55	32.5	8.575189e+000	0	0	0	0	0	0	-3.56405	0	0	57.5363	32.2647
DATA	557	7	47	0	0	A_43_P12519	NM_031114	1609.5	229.5	9.787109e+003	9.787167e+002	8865	33	7.633159e+000	0	0	0	0	0	0	9049.75	1	1	49.1849	33.1563
DATA	558	7	48	0	0	A_44_P317600	NM_012612	1635.42	229.573	4.751215e+002	4.763410e+001	505	30	8.382777e+000	0	0	0	0	0	0	437.198	1	1	57.5363	29.8235
DATA	559	7	49	0	0	A_64_P034166	A_64_P034166	1660.58	229.573	1.333290e+001	3.673426e+000	72	33.5	9.666829e+000	0	0	0	0	0	0	12.2094	1	0	57.5363	33.6875
DATA	560	7	50	0	0	A_64_P024585	NM_001109337	1686	229.545	1.599663e+001	3.793831e+000	75	30	6.772154e+000	0	0	0	0	0	0	14.5756	1	0	55.8519	29.1724
DATA	561	7	51	0	0	A_42_P654682	NM_012724	1711.5	229.648	1.596439e+001	3.808421e+000	74.5	27.5	7.477968e+000	0	0	0	0	0	0	14.4723	1	0	57.5363	28
DATA	562	7	52	0	0	A_42_P524610	NM_001108992	1736.6	229.844	2.663823e+003	2.664049e+002	2330.5	29	8.722368e+000	0	0	0	0	0	0	2402.6	1	1	49.8279	31.5833
DATA	563	7	53	0	0	A_64_P046677	NM_020093	1762.19	229.942	1.595010e+001	3.840555e+000	74	31	7.391957e+000	0	0	0	0	0	0	14.3102	1	0	46.8651	31.7949
DATA	564	7	54	0	0	A_64_P042742	XM_001061779	1787.43	229.768	5.874165e+002	5.884657e+001	585	29.5	7.779106e+000	0	0	0	0	0	0	524.226	1	1	46.8651	30.0833
DATA	565	7	55	0	0	A_64_P058430	ENSRNOT00000062073	1812.89	229.887	2.256808e+001	4.190791e+000	81	32	7.424621e+000	0	0	0	0	0	0	20.0325	1	1	46.8651	32.6875
DATA	566	7	56	0	0	A_42_P479251	NM_001108686	1838.16	229.882	8.689106e+003	8.689179e+002	7404.5	28	7.492629e+000	0	0	0	0	0	0	7671.36	1	1	46.5243	29.0857
DATA	567	7	57	0	0	A_42_P777329	NM_001106943	1863.5	230	5.527163e+002	5.538678e+001	536.5	29	7.344949e+000	0	0	0	0	0	0	485.338	1	1	48.5334	29.3448
DATA	568	7	58	0	0	A_64_P103414	NM_001106472	1889.39	229.931	1.782577e+001	4.007926e+000	75	30.5	6.528225e+000	0	0	0	0	0	0	15.5653	1	0	53.8203	31.8929
DATA	569	7	59	0	0	A_64_P082164	A_64_P082164	1914.5	230	1.009935e+002	1.072488e+001	142	31.5	7.623693e+000	0	0	0	0	0	0	87.7101	1	1	54.1152	32.5
DATA	570	7	60	0	0	A_42_P702729	NM_001107557	1939.87	229.944	2.038447e+003	2.038770e+002	1746.5	33	9.799660e+000	0	0	0	0	0	0	1760.62	1	1	46.8651	33.6333
DATA	571	7	61	0	0	A_64_P130922	A_64_P130922	1965.2	230	5.293221e+002	5.305783e+001	511	32.5	9.329108e+000	0	0	0	0	0	0	454.691	1	1	49.1849	31.5
DATA	572	7	62	0	0	A_42_P509843	NM_001100480	1990.44	229.973	6.547109e+002	6.557381e+001	589	27.5	8.930704e+000	0	0	0	0	0	0	559.351	1	1	48.5334	29.0333
DATA	573	7	63	0	0	A_64_P110759	A_64_P110759	2016.11	229.908	5.432502e+001	6.566708e+000	105	30	7.182458e+000	0	0	0	0	0	0	46.1577	1	1	47.8731	31.6563
DATA	574	7	64	0	0	A_64_P006235	A_64_P006235	2041.5	230	8.343101e+002	8.351341e+001	759.5	30	6.375693e+000	0	0	0	0	0	0	705.083	1	1	48.5334	29.129
DATA	575	7	65	0	0	A_44_P506064	NM_001191778	2067	230	4.082690e+001	5.529281e+000	94	30	8.157268e+000	0	0	0	0	0	0	34.319	1	1	54.9904	32.65
DATA	576	7	66	0	0	A_64_P075425	A_64_P075425	2092.3	230.1	9.185391e+003	9.185468e+002	7637	31	8.410616e+000	0	0	0	0	0	0	7680.99	1	1	47.2035	31.5385
DATA	577	7	67	0	0	A_42_P544898	NM_001108279	2117.5	230	4.260152e+001	5.687304e+000	95	31	6.540760e+000	0	0	0	0	0	0	35.4406	1	1	54.1152	32.3077
DATA	578	7	68	0	0	A_44_P837192	ENSRNOT00000038251	2143.1	229.985	2.958971e+001	4.806108e+000	81	30	6.496820e+000	0	0	0	0	0	0	24.4898	1	1	46.8651	30.7188
DATA	580	7	70	0	0	A_44_P325657	NM_001014007	2193.91	230.065	1.438865e+002	1.488831e+001	177	32.5	9.385075e+000	0	0	0	0	0	0	117.92	1	1	54.4085	32.7188
DATA	581	7	71	0	0	A_64_P004598	ENSRNOT00000024034	2219.22	230.119	2.705247e+002	2.732404e+001	280.5	27	7.742079e+000	0	0	0	0	0	0	220.662	1	1	45.835	28.8387
DATA	582	7	72	0	0	A_42_P607183	XM_001081723	2244.22	229.892	1.605913e+003	1.606377e+002	1371.5	29.5	8.447225e+000	0	0	0	1	0	0	1303.92	1	1	45.835	29.9118
DATA	584	7	74	0	0	A_42_P589190	NM_023104	2295.35	230.12	8.597316e+002	8.606131e+001	737	30	1.132767e+001	0	0	0	0	0	0	691.99	1	1	48.8603	33.129
DATA	585	7	75	0	0	A_42_P757323	TC587630	2320.44	230.028	4.538979e+003	4.539147e+002	3537	28.5	8.626432e+000	0	0	0	0	0	0	3638.53	1	1	48.2044	31.6875
DATA	586	7	76	0	0	A_42_P688320	NM_001108569	2346.71	230.171	3.202048e+002	3.226026e+001	315.5	28	7.986133e+000	0	0	0	0	0	0	255.656	1	1	47.2035	29.7241
DATA	587	7	77	0	0	A_44_P224705	NM_031002	2371.2	230.042	1.083604e+002	1.153013e+001	142.5	33	9.347212e+000	0	0	0	0	0	0	86.2056	1	1	46.8651	32.5
DATA	588	7	78	0	0	A_42_P481849	NM_001100563	2397.09	230.386	2.084918e+003	2.085293e+002	1711.5	29.5	6.891691e+000	0	0	0	1	0	0	1652.91	1	1	57.259	28.7667
DATA	589	7	79	66	1	DarkCorner	DarkCorner	2422.5	230.352	3.979716e+000	3.966618e+000	54.5	26.5	6.659520e+000	0	0	0	0	0	0	-4.17027	0	0	57.5363	26.8571
DATA	590	7	80	66	1	DarkCorner	DarkCorner	2448.03	230.583	3.991492e+000	3.978355e+000	54	29	5.946601e+000	0	0	0	0	0	0	-2.45386	0	0	48.5334	27.8276
DATA	591	7	81	66	1	DarkCorner	DarkCorner	2473.65	230.247	4.002862e+000	3.989688e+000	56	28	4.509730e+000	0	0	0	0	0	0	-1.60735	0	0	51.0895	26.6364
DATA	592	7	82	66	1	DarkCorner	DarkCorner	2498.15	230.493	4.012133e+000	3.998928e+000	59	30	7.775884e+000	0	0	0	0	0	0	-1.59152	0	0	49.8279	28.8667
DATA	593	7	83	66	1	DarkCorner	DarkCorner	2524.92	230.635	4.021183e+000	4.027553e+000	59	30	6.306670e+000	0	0	0	0	0	0	3.10401	0	0	52.0157	29.186
DATA	594	7	84	66	1	DarkCorner	DarkCorner	2549.67	230.134	4.029020e+000	4.027822e+000	61.5	31.5	6.592568e+000	0	0	0	0	0	0	2.43131	0	0	50.7771	32.375
DATA	595	7	85	66	1	DarkCorner	DarkCorner	2574.79	230.194	8.582435e+000	4.112427e+000	64	29	8.606874e+000	0	0	0	0	0	0	6.68881	1	0	47.5395	29.641
DATA	596	8	1	66	1	DarkCorner	DarkCorner	454.317	236.378	7.704095e+000	3.634053e+000	67.5	29	7.402914e+000	0	0	0	0	0	0	6.79959	1	0	51.0895	29.3922
DATA	597	8	2	66	1	DarkCorner	DarkCorner	480.043	236.043	3.605816e+000	3.538096e+000	66	31	6.271780e+000	0	0	0	0	0	0	3.2112	1	0	46.8651	31.0909
DATA	598	8	3	66	1	DarkCorner	DarkCorner	504.975	236.633	3.501705e+000	3.490180e+000	63	30	7.576629e+000	0	0	0	0	0	0	-1.27036	0	0	49.5074	31.0303
DATA	599	8	4	66	1	DarkCorner	DarkCorner	530.235	236.099	3.473992e+000	3.462559e+000	60	32	7.279076e+000	0	0	0	0	0	0	-3.85786	0	0	50.4627	31.5806
DATA	600	8	5	66	1	DarkCorner	DarkCorner	555.57	235.671	3.447813e+000	3.436466e+000	59	27.5	8.245586e+000	0	0	0	0	0	0	-3.1352	0	0	49.1849	28.8056
DATA	601	8	6	66	1	DarkCorner	DarkCorner	581.418	236.573	3.422188e+000	3.410925e+000	59	27.5	7.379259e+000	0	0	0	0	0	0	-2.90054	0	0	57.5363	28.1875
DATA	602	8	7	66	1	DarkCorner	DarkCorner	606.582	236.573	3.399227e+000	3.388039e+000	59	31.5	8.659856e+000	0	0	0	0	0	0	-2.31447	0	0	57.5363	31.8
DATA	603	8	8	0	0	A_44_P487081	NM_001033951	631.857	236.19	6.545716e+002	6.554368e+001	664	33	8.401557e+000	0	0	0	0	0	0	609.418	1	1	45.1352	33.1154
DATA	604	8	9	0	0	A_64_P054403	NM_001170340	657.671	236.257	2.549338e+002	2.571207e+001	305	30	8.310157e+000	0	0	0	0	0	0	238.796	1	1	47.2035	32.3939
DATA	605	8	10	0	0	A_44_P665685	NM_001109325	683	236.545	1.963484e+001	3.863753e+000	78.5	35	6.828355e+000	0	0	0	0	0	0	18.495	1	1	55.8519	34.1667
DATA	606	8	11	0	0	A_42_P531684	NM_001014215	708.608	236.527	2.993947e+002	3.012193e+001	337.5	31	7.326194e+000	0	0	0	0	0	0	283.489	1	1	48.8603	31.8387
DATA	607	8	12	0	0	A_42_P722904	ENSRNOT00000006525	733.568	236.608	2.823070e+003	2.823262e+002	2676	29	6.724467e+000	0	0	0	1	0	0	2685.71	1	1	49.1849	30.4615
DATA	608	8	13	0	0	A_42_P514057	NM_031839	759.246	235.971	2.698432e+001	4.247664e+000	87	30	5.209050e+000	0	0	0	0	0	0	25.784	1	1	46.5243	31.0909
DATA	609	8	14	0	0	A_64_P087459	A_64_P087459	784.5	236.648	8.947844e+004	8.947845e+003	86451	38	8.957764e+000	0	0	0	0	0	0	85846.7	1	1	57.5363	37.8077
DATA	610	8	15	0	0	A_42_P581060	NM_001108722	809.871	236.529	1.150536e+004	1.150541e+003	10854.5	28.5	6.771814e+000	0	0	0	0	0	0	11078.5	1	1	47.8731	29.0667
DATA	611	8	16	0	0	A_42_P658220	NM_001109598	835.095	236.333	2.220447e+003	2.220684e+002	2204	30	6.994990e+000	0	0	0	0	0	0	2144.98	1	1	45.1352	29.9667
DATA	612	8	17	0	0	A_42_P758454	NM_001108101	860.368	236.803	2.450317e+002	2.471583e+001	301	32.5	7.652746e+000	0	0	0	0	0	0	237.402	1	1	49.5074	31.625
DATA	613	8	18	0	0	A_64_P140956	NM_001013141	885.691	237.029	2.888040e+002	2.906011e+001	336	35.5	8.611263e+000	0	0	0	0	0	0	280.532	1	1	46.1809	35.9231
DATA	614	8	19	0	0	A_42_P508984	NM_001007729	911.5	236.648	6.985591e+002	6.993008e+001	749	35	6.809641e+000	0	0	0	0	0	0	680.041	1	1	65	34.9394
DATA	615	8	20	0	0	A_42_P619008	NM_001013079	936.625	237	5.011915e+003	5.012018e+002	4836	35	9.375099e+000	0	0	0	0	0	0	4888.19	1	1	48.5334	36.3226
DATA	616	8	21	0	0	A_64_P058351	NM_017101	962.5	237	8.608762e+004	8.608763e+003	84306.5	37	9.989937e+000	0	0	0	0	0	0	84092	1	1	54.1152	37.8333
DATA	617	8	22	0	0	A_64_P083800	XM_001058776	987.603	236.618	6.357768e+001	7.120039e+000	125.5	37	1.114055e+001	0	0	0	0	0	0	62.1738	1	1	46.5243	38.3871
DATA	618	8	23	0	0	A_64_P028088	NM_001106073	1013.13	236.691	5.697707e+002	5.706700e+001	594	30	6.366766e+000	0	0	0	0	0	0	557.672	1	1	45.835	30.9167
DATA	619	8	24	0	0	A_44_P105441	ENSRNOT00000042202	1038.43	236.827	1.504758e+004	1.504761e+003	14827.5	31	6.707903e+000	0	0	0	0	0	0	14736.1	1	1	49.8279	30.8125
DATA	620	8	25	0	0	A_42_P675802	NM_145777	1063.84	236.838	2.465248e+003	2.465456e+002	2385	33	8.942111e+000	0	0	0	0	0	0	2414.75	1	1	47.8731	33.2571
DATA	621	8	26	0	0	A_64_P018525	ENSRNOT00000027134	1089.5	237	4.042678e+002	4.055325e+001	455	33	9.287154e+000	0	0	0	0	0	0	395.96	1	1	54.1152	32.5862
DATA	622	8	27	0	0	A_42_P749382	NM_001106731	1114.61	236.732	1.091484e+004	1.091489e+003	10221	29.5	7.717851e+000	0	0	0	0	0	0	10686.2	1	1	47.5395	30
DATA	623	8	28	0	0	A_44_P316364	NM_001077675	1140	237	2.349366e+001	3.972757e+000	84	32.5	1.002577e+001	0	0	0	0	0	0	22.9866	1	1	65	33.6333
DATA	624	8	29	0	0	A_64_P143596	ENSRNOT00000060139	1165.19	236.625	1.128328e+002	1.173013e+001	167	31	9.581729e+000	0	0	0	0	0	0	110.288	1	1	46.8651	31.5714
DATA	625	8	30	0	0	A_42_P468723	NM_001191689	1190.73	236.775	5.886561e+002	5.895311e+001	608	32.5	9.565503e+000	0	0	0	0	0	0	574.675	1	1	47.2035	33.4667
DATA	626	8	31	0	0	A_42_P533792	NM_001106575	1215.93	236.786	1.159142e+004	1.159147e+003	10853.5	35	9.923255e+000	0	0	0	0	0	0	11299.3	1	1	46.8651	34.9487
DATA	627	8	32	0	0	A_43_P16773	XM_217313	1241.22	236.75	4.709993e+002	4.720995e+001	523.5	30	5.776623e+000	0	0	0	0	0	0	458.32	1	1	45.1352	30.2703
DATA	628	8	33	0	0	A_42_P765830	NM_001106426	1267	236.839	1.906345e+004	1.906347e+003	18257	33	7.316192e+000	0	0	0	0	0	0	18512.5	1	1	51.4001	33.12
DATA	629	8	34	0	0	A_43_P15073	ENSRNOT00000030771	1292.38	236.958	8.713135e+001	9.294314e+000	147	34	8.604478e+000	0	0	0	0	0	0	84.4229	1	1	48.2044	35.963
DATA	630	8	35	0	0	A_42_P538527	NM_001108885	1317.73	236.836	9.793006e+002	9.798374e+001	949	33	9.059531e+000	0	0	0	1	0	0	946.476	1	1	48.2044	32.5652
DATA	631	8	36	0	0	A_64_P037130	A_64_P037130	1343.35	237.371	9.404157e+000	3.385187e+000	68	32	8.233182e+000	0	0	0	0	0	0	9.06451	1	0	44.4243	31.7838
DATA	632	8	37	0	0	A_44_P536115	NM_023957	1368.37	236.557	3.134759e+003	3.134928e+002	2962.5	31.5	8.286965e+000	0	0	0	0	0	0	3012.44	1	1	46.8651	32.4118
DATA	633	8	38	0	0	A_43_P11800	NM_017059	1393.93	236.786	2.639771e+002	2.659973e+001	311	29	7.136518e+000	0	0	0	0	0	0	252.877	1	1	46.8651	30.6333
DATA	634	8	39	0	0	A_64_P004922	NM_001191924	1419.17	237	1.421984e+003	1.422363e+002	1354	34	8.920919e+000	0	0	0	0	0	0	1357.67	1	1	46.8651	33.871
DATA	635	8	40	0	0	A_64_P145058	NM_001107951	1444.73	236.775	1.036561e+003	1.037084e+002	1038.5	35.5	9.048663e+000	0	0	0	0	0	0	986.102	1	1	47.2035	33.7857
DATA	636	8	41	0	0	A_64_P075372	A_64_P075372	1470.39	237.069	3.337995e+001	4.698965e+000	93	33	8.140434e+000	0	0	0	0	0	0	31.6361	1	1	53.8203	33
DATA	637	8	42	0	0	A_64_P118792	NM_001107034	1495.5	237	3.164801e+001	4.586899e+000	89	35.5	8.491534e+000	0	0	0	0	0	0	29.8779	1	1	54.1152	37.1154
DATA	638	8	43	0	0	A_42_P469685	NM_001100532	1520.87	236.9	4.246428e+003	4.246558e+002	3962	30	7.185376e+000	0	0	0	0	0	0	3992.47	1	1	46.8651	30
DATA	639	8	44	0	0	A_42_P759822	NM_001109673	1546.5	237.352	6.288476e+002	6.297382e+001	646	33	7.779201e+000	0	0	0	0	0	0	588.741	1	1	57.5363	34.1143
DATA	640	8	45	0	0	A_64_P014687	NM_012650	1571.58	237.427	8.828920e+003	8.828984e+002	8373	32	8.770641e+000	0	0	0	0	0	0	8229.98	1	1	57.5363	31.2
DATA	641	8	46	0	0	A_43_P18505	NM_001012010	1597.42	237.427	6.222519e+001	7.080399e+000	117	34	7.706141e+000	0	0	0	0	0	0	57.736	1	1	57.5363	33
DATA	642	8	47	0	0	A_43_P12580	NM_031548	1622.5	237.352	1.810839e+002	1.842369e+001	225	33	8.103664e+000	0	0	0	0	0	0	167.242	1	1	57.5363	33.7436
DATA	643	8	48	0	0	A_64_P052980	NM_001014786	1648	237.455	3.370976e+001	4.795148e+000	91	30	9.907434e+000	0	0	0	0	0	0	30.9837	1	1	55.8519	32.3125
DATA	644	8	49	0	0	A_64_P397764	ENSRNOT00000028709	1673.26	236.855	4.860976e+002	4.873043e+001	499.5	31	1.064412e+001	0	0	0	0	0	0	444.564	1	1	46.1809	32.3784
DATA	645	8	50	0	0	A_64_P048408	NM_001008858	1698.32	236.838	1.661714e+002	1.697036e+001	205	29	7.134700e+000	0	0	0	0	0	0	151.222	1	1	46.1809	28.2414
DATA	647	8	52	0	0	A_64_P059500	ENSRNOT00000043917	1749.52	237.169	1.045016e+001	3.633650e+000	68	32.5	8.715977e+000	0	0	0	0	0	0	9.41225	1	0	45.1352	32.5556
DATA	648	8	53	0	0	A_64_P220198	AW917371	1775.32	236.865	1.646062e+001	3.866844e+000	75.5	30	7.846298e+000	0	0	0	0	0	0	14.7458	1	0	48.8603	31.2424
DATA	649	8	54	0	0	A_64_P109764	NM_001007756	1800.26	236.9	4.080846e+002	4.095976e+001	421	31	7.828814e+000	0	0	0	0	0	0	363.668	1	1	46.5243	31.0968
DATA	650	8	55	0	0	A_64_P142685	NM_001130498	1825.58	237.427	2.225175e+001	4.177796e+000	78	32	8.609337e+000	0	0	0	0	0	0	19.7256	1	1	65	30.5
DATA	651	8	56	0	0	A_44_P395709	NM_134366	1851.11	237.5	1.099690e+003	1.100265e+002	1015.5	27	6.420109e+000	0	0	0	1	0	0	969.569	1	1	56.9804	27.9697
DATA	652	8	57	0	0	A_64_P165071	NM_001110165	1876.44	237.266	1.242429e+004	1.242434e+003	10730.5	30	6.273344e+000	0	0	0	0	0	0	10894.4	1	1	50.7771	30.5
DATA	653	8	58	0	0	A_64_P009147	ENSRNOT00000042587	1901.89	237.5	7.957556e+001	8.731586e+000	133	32	7.763805e+000	0	0	0	0	0	0	69.3986	1	1	56.9804	33.12
DATA	654	8	59	0	0	A_42_P647072	NM_178102	1926.95	237.392	1.546962e+003	1.547384e+002	1353	31	8.087824e+000	0	0	0	0	0	0	1341.83	1	1	49.1849	31.7097
DATA	655	8	60	0	0	A_64_P125585	XM_001063000	1952.58	237.427	3.712194e+001	5.194594e+000	92	36	1.176619e+001	0	0	0	0	0	0	32.0224	1	1	57.5363	34.88
DATA	656	8	61	0	0	A_42_P610317	NM_001108225	1977.68	237.068	7.085778e+003	7.085872e+002	5942	26	7.822002e+000	0	0	0	0	0	0	6079.09	1	1	48.8603	26.6061
DATA	657	8	62	0	0	A_42_P755831	NM_152935	2003.28	237.16	2.617734e+004	2.617736e+003	21825	28	7.667591e+000	0	0	0	0	0	0	22336.2	1	1	49.1849	30.3667
DATA	659	8	64	0	0	A_44_P386375	NM_053842	2053.94	236.825	6.111981e+002	6.123251e+001	581.5	32.5	9.220066e+000	0	0	0	0	0	0	515.926	1	1	45.4864	33.375
DATA	660	8	65	0	0	A_43_P15565	NM_023953	2079.79	237.303	2.598236e+001	4.548145e+000	82	33	8.251033e+000	0	0	0	0	0	0	21.817	1	1	49.5074	33.7273
DATA	661	8	66	0	0	A_42_P456701	NM_001009697	2104.82	237.444	1.341888e+003	1.342412e+002	1128	32	7.083346e+000	0	0	0	0	0	0	1121.03	1	1	47.8731	32.5926
DATA	662	8	67	0	0	A_43_P20388	ENSRNOT00000061333	2130.38	237.571	1.100934e+003	1.101580e+002	943	31	7.253503e+000	0	0	0	0	0	0	915.037	1	1	49.8279	31.5517
DATA	663	8	68	0	0	A_44_P572504	TC585660	2155.67	237.5	5.229538e+002	5.243256e+001	477	28	5.557209e+000	0	0	0	0	0	0	432.477	1	1	57.5363	28.8485
DATA	664	8	69	0	0	A_64_P059964	NM_001013858	2181.08	237.167	3.662710e+003	3.662908e+002	2962	32	6.580074e+000	0	0	0	0	0	0	3013.94	1	1	46.8651	31.1563
DATA	665	8	70	0	0	A_44_P1056293	ENSRNOT00000022862	2206.74	237.222	2.022334e+003	2.022696e+002	1683.5	30	7.996335e+000	0	0	0	0	0	0	1656.11	1	1	47.5395	30.3
DATA	666	8	71	0	0	A_64_P133276	NM_001107464	2231.88	237.397	7.628060e+002	7.637745e+001	683	26	7.411438e+000	0	0	0	0	0	0	621.823	1	1	48.5334	27.8
DATA	667	8	72	0	0	A_42_P667782	NM_001009673	2257.07	237.268	1.538972e+003	1.539456e+002	1274.5	30	8.429218e+000	0	0	0	1	0	0	1248.9	1	1	47.5395	28.8621
DATA	668	8	73	0	0	A_64_P023624	A_64_P023624	2282.59	237.247	4.688477e+002	4.704500e+001	441	27	9.026371e+000	0	0	0	0	0	0	378.817	1	1	48.5334	28.2414
DATA	669	8	74	0	0	A_64_P110130	NM_001106172	2308.24	237.353	7.035131e+002	7.045909e+001	630	28	9.288951e+000	0	0	0	0	0	0	566.044	1	1	46.1809	30.2692
DATA	670	8	75	0	0	A_64_P087728	XM_001078778	2333.39	237.435	1.534711e+002	1.583762e+001	182.5	28	6.476821e+000	0	0	0	0	0	0	122.998	1	1	47.5395	29.2222
DATA	671	8	76	0	0	A_44_P475356	NM_001177823	2359	237.545	2.831100e+002	2.858192e+001	284	32	9.295698e+000	0	0	0	0	0	0	226.037	1	1	55.8519	32.92
DATA	672	8	77	0	0	A_42_P560984	NM_001109179	2384.07	237.268	1.569605e+004	1.569610e+003	12285.5	33	8.418966e+000	0	0	0	0	0	0	12486.8	1	1	47.5395	32.3429
DATA	673	8	78	0	0	A_42_P566906	NM_001006966	2409.63	237.36	3.770148e+003	3.770355e+002	3034	31	7.357216e+000	0	0	0	0	0	0	2989.26	1	1	48.8603	29.7083
DATA	674	8	79	66	1	DarkCorner	DarkCorner	2435.5	237.951	3.978367e+000	3.965273e+000	51	26	7.283085e+000	0	0	0	0	0	0	-5.121	0	0	50.4627	26.72
DATA	675	8	80	66	1	DarkCorner	DarkCorner	2460.65	237.514	3.990069e+000	3.976937e+000	55	28	4.800105e+000	0	0	0	0	0	0	-3.9687	0	0	48.8603	27.6786
DATA	676	8	81	66	1	DarkCorner	DarkCorner	2486.28	237.813	4.000204e+000	3.987038e+000	52	28	8.611881e+000	0	0	0	0	0	0	-4.31181	0	0	54.4085	28.5455
DATA	677	8	82	66	1	DarkCorner	DarkCorner	2511.47	238.158	4.009016e+000	3.995822e+000	55	31	6.549201e+000	0	0	0	0	0	0	-0.290758	0	0	49.1849	30.7179
DATA	678	8	83	66	1	DarkCorner	DarkCorner	2537	237.66	4.017647e+000	4.005852e+000	58	31.5	6.543928e+000	0	0	0	0	0	0	0.837089	0	0	38.2652	31.9333
DATA	679	8	84	66	1	DarkCorner	DarkCorner	2562.58	238.231	5.166630e+000	4.043848e+000	61	33	9.760523e+000	0	0	0	0	0	0	4.03788	1	0	49.5074	33.963
DATA	680	8	85	66	1	DarkCorner	DarkCorner	2587.43	237.506	6.457905e+000	4.068463e+000	60	26	6.940763e+000	0	0	0	0	0	0	5.03929	1	0	50.4627	26.244
DATA	681	9	1	66	1	DarkCorner	DarkCorner	441.628	243.5	3.575873e+000	3.564104e+000	58	27	7.641681e+000	0	0	0	0	0	0	-2.05173	0	0	49.8279	27.87
DATA	682	9	2	66	1	DarkCorner	DarkCorner	467.566	244.013	4.949825e+000	3.565383e+000	67	29	6.545171e+000	0	0	0	0	0	0	4.39417	1	0	49.1849	29.8421
DATA	683	9	3	66	1	DarkCorner	DarkCorner	492.635	243.676	3.512508e+000	3.500947e+000	60	31	6.843724e+000	0	0	0	0	0	0	-0.380826	0	0	48.5334	31.3548
DATA	684	9	4	66	1	DarkCorner	DarkCorner	518.521	243.986	3.482998e+000	3.471535e+000	59	30	6.786657e+000	0	0	0	0	0	0	-0.579725	0	0	48.5334	30.0606
DATA	685	9	5	66	1	DarkCorner	DarkCorner	543.642	243.642	3.456362e+000	3.444986e+000	59	29.5	8.096393e+000	0	0	0	0	0	0	-2.34668	0	0	49.5074	29.6389
DATA	686	9	6	66	1	DarkCorner	DarkCorner	568.5	244	3.431280e+000	3.419987e+000	57	31	7.657730e+000	0	0	0	0	0	0	-3.58343	0	0	65	31.1842
DATA	687	9	7	66	1	DarkCorner	DarkCorner	594.049	243.901	3.407316e+000	3.396102e+000	54	30	7.074995e+000	0	0	0	0	0	0	-6.76248	0	0	50.1463	29
DATA	688	9	8	0	0	A_44_P195306	NM_019377	619.5	244	3.699253e+004	3.699254e+003	33051	32	8.843441e+000	0	0	0	0	0	0	34368.7	1	1	54.1152	32.1613
DATA	689	9	9	0	0	A_44_P653240	NM_001202552	644.929	243.8	8.137609e+002	8.144515e+001	820.5	32.5	9.309854e+000	0	0	0	0	0	0	760.698	1	1	46.8651	32.1875
DATA	690	9	10	0	0	A_64_P012778	ENSRNOT00000038310	670.6	243.814	2.481637e+001	4.155964e+000	83	29.5	7.245582e+000	0	0	0	0	0	0	23.3335	1	1	47.2035	32.5385
DATA	691	9	11	0	0	A_43_P11430	NM_001130503	695.5	244	4.444825e+002	4.457178e+001	480	33	9.513995e+000	0	0	0	0	0	0	420.132	1	1	48.5334	34.0333
DATA	692	9	12	0	0	A_44_P225353	NM_001009678	721.149	244.015	5.751560e+002	5.761017e+001	590	29	7.406829e+000	0	0	0	0	0	0	546.38	1	1	46.8651	31.25
DATA	693	9	13	0	0	A_64_P055231	NM_001106620	746.568	243.827	1.056053e+003	1.056564e+002	1066	30	6.649012e+000	0	0	0	0	0	0	1007.8	1	1	49.8279	31.069
DATA	694	9	14	0	0	A_42_P540950	NM_001009541	771.706	243.853	9.818733e+002	9.824179e+001	1015	35	8.303366e+000	0	0	0	0	0	0	940.912	1	1	45.835	34.7727
DATA	695	9	15	0	0	A_64_P135888	ENSRNOT00000029916	797.27	243.77	1.522588e+001	3.596609e+000	77.5	32.5	9.863462e+000	0	0	0	0	0	0	14.6468	1	0	48.2044	34.5
DATA	696	9	16	0	0	A_64_P086448	NM_001008819	822.848	243.864	1.364326e+002	1.402435e+001	190.5	29	6.716056e+000	0	0	0	0	0	0	131.701	1	1	46.1809	29.5185
DATA	697	9	17	0	0	A_42_P701779	NM_001108048	847.562	243.973	1.931659e+003	1.931930e+002	1884	31	7.705640e+000	0	0	0	0	0	0	1870.29	1	1	48.5334	30.2424
DATA	698	9	18	0	0	A_44_P409965	ENSRNOT00000036078	873.347	244.097	3.889090e+001	5.054426e+000	99.5	34	5.491392e+000	0	0	0	0	0	0	37.7603	1	1	48.2044	33.3462
DATA	699	9	19	0	0	A_44_P474037	NM_052807	898.634	244.127	1.926098e+002	1.952840e+001	246	34	9.005530e+000	0	0	0	0	0	0	187.453	1	1	47.5395	35.3636
DATA	700	9	20	0	0	A_64_P156985	NM_001000385	924.5	244	1.163179e+001	3.418140e+000	72	33	6.453726e+000	0	0	0	0	0	0	11.3435	1	0	65	33.2667
DATA	701	9	21	0	0	A_42_P635228	NM_001107651	949.5	244	6.528285e+001	7.274276e+000	125	33	7.048513e+000	0	0	0	0	0	0	63.7704	1	1	54.1152	33.1923
DATA	702	9	22	0	0	A_64_P240508	ENSRNOT00000018000	975	244	3.579487e+002	3.593802e+001	411	39	9.993305e+000	0	0	0	0	0	0	350.129	1	1	65	39.1154
DATA	703	9	23	0	0	A_64_P026509	NM_020656	1000	244.296	1.409332e+002	1.445230e+001	202	35.5	9.994116e+000	0	0	0	0	0	0	137.997	1	1	46.8651	37.2353
DATA	704	9	24	0	0	A_42_P570241	NM_177928	1025.09	244.104	3.682465e+002	3.696334e+001	418	32	8.516456e+000	0	0	0	0	0	0	360.818	1	1	46.8651	33.5676
DATA	706	9	26	0	0	A_64_P032893	TC597420	1076.5	244	3.062123e+004	3.062125e+003	29277	32	8.376105e+000	0	0	0	0	0	0	30017.3	1	1	54.1152	32.3226
DATA	707	9	27	0	0	A_64_P043605	NM_001024799	1101.68	243.973	5.466988e+003	5.467082e+002	5201	32	9.135897e+000	0	0	0	0	0	0	5357.95	1	1	49.1849	31.2308
DATA	708	9	28	0	0	A_64_P095890	NM_019337	1127.13	244	1.224999e+004	1.225004e+003	11865	28	8.732026e+000	0	0	0	0	0	0	11999.4	1	1	48.5334	31.4
DATA	709	9	29	0	0	A_42_P513145	NM_001107288	1152.43	243.768	5.149075e+002	5.159025e+001	548	31	1.168522e+001	0	0	0	0	0	0	503.958	1	1	46.8651	33.8125
DATA	710	9	30	0	0	A_64_P122317	NM_001108031	1177.89	243.723	2.580203e+002	2.600045e+001	312.5	31	9.269431e+000	0	0	0	0	0	0	252.257	1	1	45.835	31.1212
DATA	711	9	31	0	0	A_64_P065492	NM_001109101	1203.5	244.352	4.338448e+001	5.397028e+000	103	34	1.037159e+001	0	0	0	0	0	0	42.3605	1	1	57.5363	33.3548
DATA	712	9	32	0	0	A_64_P129273	NM_001105871	1229	244.455	6.967075e+001	7.673288e+000	128.5	35	9.765980e+000	0	0	0	0	0	0	67.9162	1	1	65	35.1
DATA	713	9	33	0	0	A_64_P050748	NM_181824	1254.42	244.427	5.475489e+001	6.352896e+000	113	31	6.433479e+000	0	0	0	0	0	0	53.2754	1	1	57.5363	31.7
DATA	714	9	34	0	0	A_42_P689755	NM_053306	1279.58	244.427	5.613656e+001	6.475750e+000	117	36.5	7.954581e+000	0	0	0	0	0	0	54.5045	1	1	57.5363	36.3333
DATA	715	9	35	0	0	A_64_P039586	TC635481	1305.42	244.427	2.550397e+002	2.570846e+001	311.5	32	7.848142e+000	0	0	0	0	0	0	247.028	1	1	57.5363	33.48
DATA	716	9	36	0	0	A_64_P083474	NM_001134731	1330.09	244.104	6.747589e+003	6.747667e+002	6372	30.5	8.787465e+000	0	0	0	0	0	0	6518.86	1	1	46.8651	32.4333
DATA	718	9	38	0	0	A_42_P763553	NM_001107486	1381.09	243.896	1.122885e+002	1.169355e+001	167	30	7.831972e+000	0	0	0	0	0	0	107.842	1	1	46.8651	31.1613
DATA	719	9	39	0	0	A_44_P151513	NM_001000901	1406.58	244.427	8.915062e+000	3.393385e+000	69	30	9.116217e+000	0	0	0	0	0	0	8.5347	1	0	57.5363	31.5185
DATA	720	9	40	0	0	A_42_P460204	ENSRNOT00000020886	1432	243.922	4.926589e+002	4.937534e+001	532.5	31	8.315324e+000	0	0	0	0	0	0	469.981	1	1	46.1809	33.2308
DATA	721	9	41	0	0	A_44_P218147	NM_001013432	1457.2	244.167	5.220425e+001	6.174667e+000	111.5	33	9.113894e+000	0	0	0	0	0	0	49.6232	1	1	46.1809	33.7838
DATA	722	9	42	0	0	A_42_P554722	NM_001099758	1482.89	244.5	1.072009e+004	1.072014e+003	9744.5	35	1.000480e+001	0	0	0	0	0	0	10151.2	1	1	56.9804	34.8966
DATA	723	9	43	0	0	A_44_P135450	XM_223143	1508.42	244.427	4.086932e+002	4.100423e+001	452	34	1.017545e+001	0	0	0	0	0	0	385.448	1	1	57.5363	34.8387
DATA	724	9	44	0	0	A_64_P107329	NM_001013207	1533.24	244.471	9.490910e+003	9.490969e+002	8594	31	6.809157e+000	0	0	0	0	0	0	8914.83	1	1	47.2035	31.7308
DATA	725	9	45	0	0	A_64_P116219	NM_001004085	1558.87	244.229	1.549482e+004	1.549485e+003	14138.5	32	1.023193e+001	0	0	0	0	0	0	14490.5	1	1	46.5243	33.6857
DATA	726	9	46	0	0	A_44_P147396	NM_001191744	1584.41	244.16	4.692797e+001	5.775631e+000	105	33	8.522267e+000	0	0	0	0	0	0	43.6895	1	1	49.1849	31.875
DATA	727	9	47	0	0	A_44_P975743	TC626448	1609.1	244.423	1.497011e+003	1.497393e+002	1387	31	8.404931e+000	0	0	0	0	0	0	1387.55	1	1	50.1463	32
DATA	728	9	48	0	0	A_42_P728472	NM_001007600	1635.04	244.333	8.945055e+003	8.945119e+002	7871	30	8.573915e+000	0	0	0	0	0	0	8250.96	1	1	48.5334	31.6486
DATA	729	9	49	0	0	A_64_P130139	NM_013181	1660.21	244.4	1.219053e+004	1.219057e+003	10652	34	1.128865e+001	0	0	0	0	0	0	11190.9	1	1	49.1849	35.0606
DATA	730	9	50	0	0	A_42_P481087	XM_232226	1685.79	244.521	1.396738e+003	1.397160e+002	1251.5	32	9.077794e+000	0	0	0	0	0	0	1275.86	1	1	48.2044	31.7778
DATA	731	9	51	0	0	A_44_P102465	NM_001000424	1711.5	244.5	5.748671e+001	6.703956e+000	112	31.5	9.523951e+000	0	0	0	0	0	0	52.2441	1	1	57.5363	30.9375
DATA	732	9	52	0	0	A_64_P082557	ENSRNOT00000029274	1736.67	244.5	3.078175e+001	4.636006e+000	87	31	8.645141e+000	0	0	0	0	0	0	27.8327	1	1	65	32.5385
DATA	733	9	53	0	0	A_64_P064873	XM_228599	1762.03	244.5	3.817802e+001	5.169007e+000	94	31	7.286596e+000	0	0	0	0	0	0	34.3413	1	1	47.8731	31.2353
DATA	734	9	54	0	0	A_64_P042298	A_64_P042298	1787.5	244.5	9.507577e+001	1.013243e+001	146.5	31	7.205322e+000	0	0	0	0	0	0	85.07	1	1	57.5363	31
DATA	735	9	55	0	0	A_44_P286341	ENSRNOT00000038519	1813.24	244.493	1.797184e+001	3.954156e+000	75	30.5	7.337815e+000	0	0	0	0	0	0	15.9938	1	1	47.2035	29.3158
DATA	736	9	56	0	0	A_44_P994614	NM_001106646	1838.5	244.5	3.831009e+004	3.831011e+003	33418.5	29	7.789724e+000	0	0	0	0	0	0	33911.9	1	1	57.5363	29.5862
DATA	737	9	57	0	0	A_64_P098354	XM_001066867	1863.67	244.5	1.738628e+002	1.774702e+001	214	30	6.571141e+000	0	0	0	0	0	0	153.08	1	1	57.5363	30.0714
DATA	738	9	58	0	0	A_64_P117373	NM_001107752	1888.93	244.884	9.222356e+001	9.892505e+000	141	30	4.884865e+000	0	0	0	0	0	0	80.7676	1	1	46.8651	29.4762
DATA	739	9	59	0	0	A_64_P111395	ENSRNOT00000025391	1914.31	244.773	4.848967e+002	4.862303e+001	465	32	7.784124e+000	0	0	0	0	0	0	422.35	1	1	49.1849	33.1481
DATA	740	9	60	0	0	A_64_P059465	XM_229201	1940	244.545	2.103659e+001	4.185764e+000	76	33.5	7.778633e+000	0	0	0	0	0	0	18.2216	1	1	55.8519	32.9118
DATA	741	9	61	0	0	A_64_P010852	NM_001106214	1965.11	244.352	2.313712e+004	2.313715e+003	19378	30.5	8.913087e+000	0	0	0	0	0	0	19932.7	1	1	47.8731	31.0357
DATA	742	9	62	0	0	A_64_P024967	NM_001008359	1990.58	244.573	6.590462e+001	7.537607e+000	112.5	27	5.230036e+000	0	0	0	0	0	0	56.472	1	1	57.5363	26.7407
DATA	743	9	63	0	0	A_44_P278418	NM_012538	2016.03	244.554	3.494693e+001	5.073414e+000	89	31	6.739914e+000	0	0	0	0	0	0	29.7838	1	1	48.5334	31.5667
DATA	744	9	64	0	0	A_44_P821875	NM_001009500	2041.58	244.708	3.652656e+001	5.197488e+000	90	30	6.861262e+000	0	0	0	0	0	0	30.9642	1	1	48.5334	30.6667
DATA	745	9	65	0	0	A_64_P066737	A_64_P066737	2067	244.545	5.875966e+001	6.953083e+000	107	33	8.378901e+000	0	0	0	0	0	0	49.547	1	1	55.8519	33.7209
DATA	746	9	66	0	0	A_64_P003943	TC616650	2092.42	244.573	8.593352e+001	9.370649e+000	132.5	32	8.663379e+000	0	0	0	0	0	0	72.0833	1	1	57.5363	33.1481
DATA	747	9	67	0	0	A_64_P047035	ENSRNOT00000066263	2117.58	244.573	1.697717e+001	4.121722e+000	72	31	7.213769e+000	0	0	0	0	0	0	14.1685	1	0	65	31.0385
DATA	748	9	68	0	0	A_64_P113867	NM_001077201	2142.78	244.972	4.107057e+002	4.124364e+001	400	29.5	4.638958e+000	0	0	0	0	0	0	341.077	1	1	47.2035	29.0417
DATA	749	9	69	0	0	A_64_P013758	NM_012582	2168.5	244.648	8.486366e+001	9.295691e+000	127	28	6.393513e+000	0	0	0	0	0	0	70.119	1	1	57.5363	29.1765
DATA	750	9	70	0	0	A_44_P303982	NM_001106381	2193.86	244.593	1.126812e+002	1.189545e+001	151	32	9.801251e+000	0	0	0	0	0	0	92.6542	1	1	65	33
DATA	751	9	71	0	0	A_64_P048601	A_64_P048601	2219.38	244.6	6.076517e+002	6.088576e+001	551	26	8.903545e+000	0	0	0	0	0	0	497.297	1	1	45.1352	29.8387
DATA	752	9	72	0	0	A_44_P304880	NM_001014261	2245.13	244.671	8.166846e+001	9.027876e+000	128	29.5	8.947869e+000	0	0	0	0	0	0	66.5295	1	1	49.5074	29.9333
DATA	753	9	73	0	0	A_64_P096767	ENSRNOT00000039549	2270.09	244.614	3.146878e+001	4.983697e+000	85	28	7.913220e+000	0	0	0	0	0	0	25.5242	1	1	57.259	28.7857
DATA	754	9	74	0	0	A_43_P21810	NM_001025000	2295.47	245.118	2.763819e+001	4.764107e+000	79	26	6.528219e+000	0	0	0	0	0	0	22.325	1	1	46.8651	26.4412
DATA	756	9	76	0	0	A_64_P084976	NM_001008916	2346.76	244.676	3.925012e+000	3.930542e+000	59	29	8.061057e+000	0	0	0	0	0	0	3.04767	0	0	47.5395	31.2258
DATA	757	9	77	0	0	A_64_P040004	XM_001054754	2371.64	244.87	3.077188e+003	3.077439e+002	2479	31	9.149743e+000	0	0	0	0	0	0	2456.81	1	1	46.8651	31.697
DATA	758	9	78	0	0	A_64_P156785	XM_001058828	2397.09	244.935	1.170990e+001	4.109869e+000	67	33	8.676767e+000	0	0	0	0	0	0	9.31702	1	0	54.4085	32.0625
DATA	759	9	79	0	0	A_64_P123914	XM_217505	2422.64	244.87	1.822335e+004	1.822339e+003	14492	28.5	7.739608e+000	0	0	0	0	0	0	14452.4	1	1	46.8651	28.3077
DATA	760	9	80	66	1	DarkCorner	DarkCorner	2447.96	245.041	3.976995e+000	3.963906e+000	52	28	7.746397e+000	0	0	0	0	0	0	-5.2265	0	0	46.8651	28.56
DATA	761	9	81	66	1	DarkCorner	DarkCorner	2473.63	244.886	3.988063e+000	3.974938e+000	57	27.5	5.218512e+000	0	0	0	0	0	0	-1.26854	0	0	47.2035	27.1563
DATA	762	9	82	66	1	DarkCorner	DarkCorner	2498.75	245	3.997578e+000	3.984421e+000	58	33	8.966233e+000	0	0	0	0	0	0	-0.0195228	0	0	49.1849	31.68
DATA	763	9	83	66	1	DarkCorner	DarkCorner	2524.2	245.158	4.006051e+000	3.994214e+000	57	31	6.599145e+000	0	0	0	0	0	0	0.814591	0	0	48.2044	30.7
DATA	764	9	84	66	1	DarkCorner	DarkCorner	2549.42	245.014	4.977501e+000	4.031216e+000	60.5	31	7.399408e+000	0	0	0	0	0	0	3.90012	1	0	48.8603	31.4138
DATA	765	9	85	66	1	DarkCorner	DarkCorner	2574.5	245	5.012763e+000	4.037714e+000	62	26	6.595988e+000	0	0	0	0	0	0	3.92176	1	0	54.1152	25.925
DATA	766	10	1	66	1	DarkCorner	DarkCorner	454.756	251.341	3.554799e+000	3.543099e+000	59	26	7.344172e+000	0	0	0	0	0	0	-2.81792	0	0	51.0895	27.2075
DATA	767	10	2	66	1	DarkCorner	DarkCorner	479.987	250.818	3.523941e+000	3.526189e+000	65	29	5.240251e+000	0	0	0	0	0	0	2.78592	0	0	48.2044	29.0909
DATA	768	10	3	66	1	DarkCorner	DarkCorner	505.4	251.386	4.841562e+000	3.516082e+000	65.5	28.5	6.403263e+000	0	0	0	0	0	0	4.35763	1	0	47.8731	29.2941
DATA	769	10	4	66	1	DarkCorner	DarkCorner	530.625	251	3.466624e+000	3.455215e+000	59	28	8.164439e+000	0	0	0	0	0	0	-0.154889	0	0	48.5334	28.5161
DATA	770	10	5	66	1	DarkCorner	DarkCorner	556	251.455	3.440270e+000	3.428948e+000	61.5	32	6.874246e+000	0	0	0	0	0	0	-0.642158	0	0	55.8519	30.5405
DATA	771	10	6	66	1	DarkCorner	DarkCorner	581.418	251.427	3.415719e+000	3.404477e+000	61	31	6.993635e+000	0	0	0	0	0	0	-1.77771	0	0	57.5363	30.1714
DATA	772	10	7	0	0	A_64_P139937	XM_001070013	607.157	250.729	1.200089e+001	3.588215e+000	72	32.5	8.439326e+000	0	0	0	0	0	0	11.124	1	0	46.8651	32.5
DATA	773	10	8	0	0	A_44_P185613	XM_001080030	632.343	250.881	1.118730e+002	1.168108e+001	166	34.5	9.597283e+000	0	0	0	0	0	0	104.354	1	1	45.835	34.2059
DATA	774	10	9	0	0	A_42_P738520	NM_001007746	657.5	251.056	1.648903e+003	1.649241e+002	1605	31.5	6.212613e+000	0	0	0	0	0	0	1547.19	1	1	48.5334	32.8214
DATA	775	10	10	66	-1	(-)3xSLv1	NegativeControl	683	251.455	3.332847e+000	3.321878e+000	60	36.5	9.793908e+000	0	0	0	0	0	0	-2.02926	0	0	55.8519	36.9286
DATA	776	10	11	0	0	A_42_P626023	NM_001107265	708.306	251.306	9.277651e+002	9.283536e+001	927	29	8.455495e+000	0	0	0	0	0	0	879.913	1	1	48.2044	31.5667
DATA	777	10	12	0	0	A_43_P11120	XR_085824	733.529	251.2	2.664604e+003	2.664807e+002	2563.5	30	5.115336e+000	0	0	0	0	0	0	2539.11	1	1	47.2035	31.4167
DATA	778	10	13	0	0	A_42_P473425	NM_138844	759.386	250.871	8.169764e+001	8.801709e+000	139.5	32	7.787658e+000	0	0	0	0	0	0	78.1946	1	1	47.2035	31.619
DATA	779	10	14	0	0	A_44_P692981	ENSRNOT00000007422	784.5	251.5	5.162260e+001	6.106399e+000	110.5	35	1.013555e+001	0	0	0	0	0	0	49.6081	1	1	57.5363	34.037
DATA	780	10	15	0	0	A_64_P102366	A_64_P102366	810.29	250.899	4.765173e+001	5.767968e+000	106.5	31	6.693503e+000	0	0	0	0	0	0	45.9579	1	1	45.835	30.8158
DATA	781	10	16	0	0	A_42_P616287	NM_001134555	835.129	250.919	2.584771e+002	2.604994e+001	315.5	28	7.613796e+000	0	0	0	0	0	0	250.085	1	1	45.1352	29.3548
DATA	782	10	17	0	0	A_64_P073995	XM_001081370	860.667	251.5	4.026529e+001	5.161988e+000	101	34	5.662744e+000	0	0	0	0	0	0	39.0741	1	1	57.5363	33
DATA	783	10	18	0	0	A_42_P595381	NM_001107258	886.333	251.5	3.394023e+003	3.394176e+002	3236	34	7.161435e+000	0	0	0	0	0	0	3302.08	1	1	57.5363	34.3846
DATA	784	10	19	0	0	A_42_P462205	NM_001007745	911.256	251.5	6.462965e+003	6.463045e+002	6092.5	31.5	7.740039e+000	0	0	0	0	0	0	6301.44	1	1	50.4627	33.0294
DATA	785	10	20	0	0	A_64_P016102	A_64_P016102	936.893	251.5	3.081024e+001	4.448519e+000	93	33.5	7.218192e+000	0	0	0	0	0	0	30.0964	1	1	65	33.3667
DATA	786	10	21	0	0	A_64_P017829	NM_001128216	962.418	251.573	1.093450e+001	3.385386e+000	73	36	8.043115e+000	0	0	0	0	0	0	10.6975	1	0	57.5363	34.3478
DATA	787	10	22	0	0	A_64_P090244	NM_001127449	987.582	251.573	1.420873e+005	1.420873e+004	138705	36	1.151739e+001	0	0	0	0	0	0	139171	1	1	57.5363	36.7083
DATA	788	10	23	0	0	A_42_P503626	NM_001044247	1013.11	251.5	6.567765e+001	7.304736e+000	124	32	7.615177e+000	0	0	0	0	0	0	64.3846	1	1	56.9804	33.5938
DATA	789	10	24	0	0	A_64_P144850	ENSRNOT00000002335	1038.25	251.239	7.041343e+001	7.732640e+000	130	33	8.580177e+000	0	0	0	0	0	0	69.0623	1	1	46.1809	34.6765
DATA	790	10	25	0	0	A_42_P703023	NM_145776	1063.89	251.5	3.476760e+002	3.491410e+001	400.5	31	8.108313e+000	0	0	0	0	0	0	341.095	1	1	56.9804	32.2432
DATA	791	10	26	0	0	A_64_P153581	NM_001109367	1089.42	251.573	6.819909e+001	7.531289e+000	127	34	8.999209e+000	0	0	0	0	0	0	66.9037	1	1	57.5363	33.7037
DATA	792	10	27	0	0	A_44_P156782	NM_001013879	1114.32	251.493	1.053349e+003	1.053834e+002	1078	29	7.671060e+000	0	0	0	0	0	0	1032.96	1	1	48.8603	30.3871
DATA	793	10	28	0	0	A_43_P12841	NM_053535	1140.11	251.5	2.101423e+002	2.125625e+001	255	28.5	8.161023e+000	0	0	0	0	0	0	205.938	1	1	56.9804	30.8667
DATA	794	10	29	0	0	A_64_P097715	NM_001135710	1165.33	251.529	1.491429e+002	1.525402e+001	209	31.5	9.517757e+000	0	0	0	0	0	0	146.023	1	1	47.8731	32.1563
DATA	795	10	30	0	0	A_42_P769597	NM_001106230	1190.57	250.968	1.087522e+003	1.087994e+002	1092	32	7.828519e+000	0	0	0	0	0	0	1063.42	1	1	44.0646	31
DATA	796	10	31	0	0	A_42_P561835	ENSRNOT00000043937	1215.93	251.282	2.148129e+002	2.171983e+001	266.5	36	1.034052e+001	0	0	0	0	0	0	209.751	1	1	47.2035	35.9063
DATA	797	10	32	0	0	A_42_P604399	NM_012941	1241.33	251.261	1.476963e+004	1.476967e+003	13792.5	32	5.828099e+000	0	0	0	1	0	0	14396.5	1	1	47.2035	33.0313
DATA	798	10	33	0	0	A_42_P744495	NM_017125	1266.75	251.373	2.996585e+003	2.996759e+002	2826	35	8.198171e+000	0	0	0	0	0	0	2915.1	1	1	49.1849	33.72
DATA	799	10	34	0	0	A_64_P047391	A_64_P047391	1292.42	251.573	5.108929e+002	5.119125e+001	558.5	36	7.354852e+000	0	0	0	0	0	0	495.89	1	1	57.5363	36.5769
DATA	800	10	35	0	0	A_44_P856007	NM_001108489	1317.43	251.671	1.673447e+002	1.704470e+001	222	31	8.708616e+000	0	0	0	0	0	0	162.038	1	1	49.5074	33
DATA	801	10	36	0	0	A_64_P057562	ENSRNOT00000031129	1343.11	251.789	6.261023e+002	6.269431e+001	660	29	1.005068e+001	0	0	0	0	0	0	604.603	1	1	46.8651	31.375
DATA	802	10	37	0	0	A_64_P102395	ENSRNOT00000029656	1368.58	251.573	1.543377e+002	1.577339e+001	206.5	34	1.090428e+001	0	0	0	0	0	0	148.598	1	1	57.5363	35.3548
DATA	803	10	38	0	0	A_64_P132318	NM_133296	1393.76	251.48	9.571131e+002	9.576701e+001	947	27	5.461990e+000	0	0	0	0	0	0	918.651	1	1	49.1849	28.6
DATA	805	10	40	0	0	A_64_P158848	NM_001130540	1444.46	251.382	1.500627e+003	1.500988e+002	1473	30	8.456932e+000	0	0	0	0	0	0	1430.47	1	1	47.2035	30.6552
DATA	806	10	41	0	0	A_64_P302888	NM_001135015	1470.42	251.573	7.290115e+001	8.002499e+000	130	33	9.311667e+000	0	0	0	0	0	0	69.2314	1	1	57.5363	33.0833
DATA	807	10	42	0	0	A_42_P604331	NM_001108533	1495.5	251.648	1.016081e+005	1.016081e+004	95908	31	1.246325e+001	0	0	0	0	0	0	96124.1	1	1	57.5363	35.2414
DATA	808	10	43	0	0	A_64_P166406	NM_019152	1520.91	251.5	6.083638e+002	6.092728e+001	637	33	8.777662e+000	0	0	0	0	0	0	573.183	1	1	47.8731	32.2121
DATA	809	10	44	0	0	A_64_P123660	NM_001031655	1545.93	251.8	1.788675e+003	1.788986e+002	1589.5	30	8.936830e+000	0	0	0	0	0	0	1678.33	1	1	46.8651	32.5625
DATA	810	10	45	0	0	A_42_P668800	NM_001127553	1571.5	251.556	1.629621e+003	1.629967e+002	1483.5	33	1.085598e+001	0	0	0	0	0	0	1522.32	1	1	47.8731	35.069
DATA	811	10	46	0	0	A_64_P090458	NM_001109516	1597.39	251.931	1.255183e+001	3.596808e+000	72	30	7.654410e+000	0	0	0	0	0	0	11.6723	1	0	65	30.56
DATA	812	10	47	0	0	A_42_P635396	NM_001109506	1622.14	251.789	2.903361e+003	2.903559e+002	2603	29	9.336449e+000	0	0	0	0	0	0	2687.67	1	1	47.2035	31.5789
DATA	813	10	48	0	0	A_64_P002989	NM_031604	1647.81	251.713	9.732199e+004	9.732200e+003	89747	35	8.849221e+000	0	0	0	0	0	0	89658.6	1	1	49.5074	35.6061
DATA	814	10	49	0	0	A_44_P914346	DV717012	1673.21	252	1.800005e+003	1.800330e+002	1645	35	1.274449e+001	0	0	0	0	0	0	1650.29	1	1	46.8651	36.5405
DATA	815	10	50	0	0	A_44_P791176	NM_001130577	1698.25	251.857	3.280402e+001	4.750298e+000	90	30.5	8.745448e+000	0	0	0	0	0	0	29.9277	1	1	48.8603	30.0313
DATA	816	10	51	0	0	A_64_P011894	NM_001004210	1724.39	251.931	2.506379e+004	2.506381e+003	22095	34.5	9.250483e+000	0	0	0	0	0	0	22747.6	1	1	53.8203	33.3571
DATA	817	10	52	0	0	A_42_P717654	XM_001063683	1749.08	252.099	3.921011e+003	3.921164e+002	3414	33	7.691165e+000	0	0	0	0	0	0	3541	1	1	46.8651	33.1333
DATA	818	10	53	0	0	A_64_P006102	NM_001100784	1774.5	251.944	2.660722e+002	2.683501e+001	288.5	32	7.463757e+000	0	0	0	0	0	0	239.028	1	1	48.5334	31.6786
DATA	819	10	54	0	0	A_64_P116038	NM_001000335	1799.34	251.803	1.714741e+001	3.904018e+000	75	31	9.322629e+000	0	0	0	0	0	0	15.3248	1	0	43.7019	31.2432
DATA	820	10	55	0	0	A_42_P581567	NM_001011899	1825.82	251.836	1.606771e+002	1.645022e+001	199.5	32	1.074110e+001	0	0	0	0	0	0	142.804	1	1	46.1809	31.3939
DATA	821	10	56	0	0	A_42_P671206	FQ231880	1850.84	251.897	1.725611e+003	1.725975e+002	1568	29	7.000000e+000	0	0	0	0	0	0	1525.59	1	1	46.5243	29.3333
DATA	823	10	58	0	0	A_64_P078205	NM_001044255	1901.59	251.908	6.877374e+003	6.877467e+002	5759	32	7.444685e+000	0	0	0	0	0	0	6014.84	1	1	49.1849	33.56
DATA	824	10	59	66	-1	(-)3xSLv1	NegativeControl	1927.01	252.013	3.615314e+000	3.603415e+000	54	33	7.481303e+000	0	0	0	0	0	0	-5.99353	0	0	46.8651	32.6452
DATA	825	10	60	0	0	A_44_P259051	NM_001037658	1952.41	252.042	4.823384e+002	4.836971e+001	474	33.5	8.622945e+000	0	0	0	0	0	0	417.304	1	1	48.2044	33.3
DATA	826	10	61	0	0	A_64_P325262	A_64_P325262	1978	252	3.318366e+001	4.927630e+000	88	28	9.823692e+000	0	0	0	0	0	0	28.5533	1	1	54.9904	29.1724
DATA	827	10	62	0	0	A_64_P140005	NM_001191804	2003.53	251.9	2.068378e+001	4.206307e+000	78	29	7.851327e+000	0	0	0	0	0	0	17.7013	1	1	47.8731	29.32
DATA	828	10	63	0	0	A_42_P588606	NM_001134544	2028.69	251.986	2.138445e+002	2.169912e+001	237	29	7.283743e+000	0	0	0	0	0	0	182.046	1	1	47.2035	30.3571
DATA	829	10	64	0	0	A_42_P788541	NM_001106794	2054	252	5.822396e+003	5.822513e+002	4918	32	9.083954e+000	0	0	0	0	0	0	4930.55	1	1	46.8651	33.5385
DATA	830	10	65	0	0	A_44_P1050200	NM_001108000	2079.43	252.177	1.416462e+003	1.416951e+002	1274	34.5	7.553839e+000	0	0	0	0	0	0	1193.27	1	1	49.5074	34.1875
DATA	831	10	66	0	0	A_42_P777935	ENSRNOT00000027369	2105.09	252.065	3.018335e+002	3.041421e+001	310	31	8.091775e+000	0	0	0	0	0	0	252.945	1	1	54.4085	30.9118
DATA	832	10	67	0	0	A_44_P349475	NM_031333	2130.35	252.12	1.109232e+003	1.109868e+002	939	30.5	7.992750e+000	0	0	0	0	0	0	924.901	1	1	48.8603	31.1667
DATA	833	10	68	0	0	A_64_P136188	XM_001059617	2155.57	252.157	2.113344e+002	2.146844e+001	237	31	6.457435e+000	0	0	0	0	0	0	175.347	1	1	47.5395	29.4615
DATA	834	10	69	0	0	A_64_P023386	NM_001106232	2181.42	252.427	4.712463e+004	4.712465e+003	37600	30	8.439299e+000	0	0	0	0	0	0	38909.1	1	1	57.5363	31.9375
DATA	835	10	70	0	0	A_64_P048576	NM_001000163	2206.5	252.352	5.146308e+001	6.405690e+000	99.5	29	8.722862e+000	0	0	0	0	0	0	42.2917	1	1	57.5363	30.3704
DATA	836	10	71	1028	1	(+)E1A_r60_a20	E1A_r60_a20	2232	252.455	3.251891e+001	5.025725e+000	83	29	7.973494e+000	0	0	0	0	0	0	26.6007	1	1	65	29.3125
DATA	837	10	72	0	0	A_64_P078510	XM_001053102	2257.33	251.781	5.446619e+002	5.460206e+001	511	32	8.247766e+000	0	0	0	0	0	0	443.487	1	1	45.1352	29.5556
DATA	838	10	73	0	0	A_64_P101533	A_64_P101533	2282.34	252.299	4.335247e+000	3.889719e+000	64	27	5.953577e+000	0	0	0	0	0	0	3.51542	1	0	49.8279	27.5152
DATA	839	10	74	0	0	A_64_P164601	ENSRNOT00000050537	2308.68	252.276	7.927056e+001	8.826617e+000	124	28.5	7.429360e+000	0	0	0	0	0	0	64.0042	1	1	49.5074	28.6538
DATA	840	10	75	0	0	A_42_P694928	NM_001109046	2333.47	252.216	2.496096e+002	2.526337e+001	261.5	29	8.941201e+000	0	0	0	0	0	0	200.76	1	1	48.8603	30.8485
DATA	841	10	76	0	0	A_42_P510565	ENSRNOT00000046259	2358.78	252.311	1.265910e+003	1.266514e+002	1065	29	6.251154e+000	0	0	0	0	0	0	1014.38	1	1	49.1849	30.6667
DATA	842	10	77	0	0	A_64_P050877	XM_001081816	2384.42	252.427	2.283929e+001	4.541690e+000	75	32	8.401952e+000	0	0	0	0	0	0	18.2364	1	1	57.5363	32.0303
DATA	843	10	78	0	0	A_44_P281352	NM_001013076	2409.51	251.929	4.210606e+002	4.228991e+001	392	27	7.740155e+000	0	0	0	0	0	0	335.06	1	1	47.8731	27.92
DATA	844	10	79	0	0	A_44_P269675	ENSRNOT00000031839	2435.28	251.971	4.059785e+002	4.078968e+001	370	26	8.055463e+000	0	0	0	0	0	0	322.052	1	1	46.1809	26.2381
DATA	845	10	80	66	1	DarkCorner	DarkCorner	2460.58	252.406	3.975147e+000	3.962064e+000	52.5	27	5.369133e+000	0	0	0	0	0	0	-5.54558	0	0	47.5395	27.4483
DATA	846	10	81	66	1	DarkCorner	DarkCorner	2485.89	252.5	3.985239e+000	3.972123e+000	56	27.5	6.565965e+000	0	0	0	0	0	0	-0.467636	0	0	56.9804	27.7188
DATA	847	10	82	66	1	DarkCorner	DarkCorner	2511.42	252.427	3.994490e+000	3.999714e+000	58.5	32	8.871389e+000	0	0	0	0	0	0	3.01459	0	0	57.5363	32.3077
DATA	848	10	83	66	1	DarkCorner	DarkCorner	2536.85	252.707	4.002196e+000	3.993612e+000	58	30	5.898125e+000	0	0	0	0	0	0	1.50363	0	0	49.1849	30
DATA	849	10	84	66	1	DarkCorner	DarkCorner	2561.78	252.922	5.695279e+000	4.035819e+000	63	29.5	7.271969e+000	0	0	0	0	0	0	4.46805	1	0	49.5074	30.8077
DATA	850	10	85	66	1	DarkCorner	DarkCorner	2587.26	252.296	1.141367e+001	4.161173e+000	63.5	26	6.713802e+000	0	0	0	0	0	0	8.94047	1	0	51.0895	26.1583
DATA	851	11	1	66	1	DarkCorner	DarkCorner	441.671	258.354	3.567943e+000	3.556200e+000	60	26	8.008527e+000	0	0	0	0	0	0	-2.24286	0	0	50.7771	27.4072
DATA	852	11	2	66	1	DarkCorner	DarkCorner	467.036	258.25	3.535927e+000	3.528505e+000	62	28	6.936945e+000	0	0	0	0	0	0	1.53366	0	0	51.7088	29.3939
DATA	853	11	3	66	1	DarkCorner	DarkCorner	492.406	258.333	3.505600e+000	3.496522e+000	59.5	29	6.614092e+000	0	0	0	0	0	0	1.1763	0	0	47.2035	28.9394
DATA	854	11	4	66	1	DarkCorner	DarkCorner	517.893	258.5	3.476848e+000	3.467461e+000	62	30	7.721396e+000	0	0	0	0	0	0	1.07991	0	0	56.9804	31.1563
DATA	855	11	5	66	1	DarkCorner	DarkCorner	543.025	258.275	3.450341e+000	3.438985e+000	59	29	7.390596e+000	0	0	0	0	0	0	-3.13002	0	0	50.1463	29.9737
DATA	856	11	6	66	1	DarkCorner	DarkCorner	568.582	258.573	3.424794e+000	3.413522e+000	58	32	5.947982e+000	0	0	0	0	0	0	-3.4685	0	0	65	32.6129
DATA	857	11	7	0	0	A_64_P077381	A_64_P077381	594.104	258.06	3.854458e+001	5.133152e+000	97	31.5	7.734072e+000	0	0	0	0	0	0	35.6389	1	1	46.8651	30.8889
DATA	858	11	8	0	0	A_64_P085926	NM_030860	619.311	258.378	1.351197e+003	1.351616e+002	1288	31	1.036534e+001	0	0	0	0	0	0	1257.5	1	1	48.5334	32.8824
DATA	859	11	9	0	0	A_42_P598560	NM_001033693	644.908	258.658	1.374588e+003	1.374995e+002	1335	35	8.901704e+000	0	0	0	0	0	0	1287.23	1	1	49.1849	35.2286
DATA	860	11	10	0	1	ETG08_142674	ETG08_142674	670.418	258.573	1.093037e+001	3.502974e+000	72	35	8.957163e+000	0	0	0	0	0	0	10.2946	1	0	57.5363	35
DATA	861	11	11	0	0	A_42_P724142	NM_001106340	695.522	258.638	1.636811e+003	1.637146e+002	1584	40	1.257405e+001	0	0	0	0	0	0	1549.75	1	1	47.5395	38.76
DATA	862	11	12	0	0	A_64_P054193	NM_001014193	721.107	258.5	3.549020e+004	3.549021e+003	33458	30	6.232957e+000	0	0	0	0	0	0	33769.4	1	1	56.9804	31.7241
DATA	863	11	13	0	0	A_42_P750554	NM_001107846	746.373	258.36	1.483453e+003	1.483815e+002	1438.5	32.5	7.708138e+000	0	0	0	0	0	0	1417.91	1	1	48.8603	32.1538
DATA	864	11	14	0	0	A_44_P285547	NM_053393	771.667	258.5	1.390106e+002	1.427951e+001	195	35	7.406561e+000	0	0	0	0	0	0	133.425	1	1	57.5363	33
DATA	865	11	15	0	0	A_42_P623374	NM_138845	797.097	258.444	1.719300e+003	1.719608e+002	1650	31	7.391581e+000	0	0	0	0	0	0	1656.5	1	1	48.2044	31.0294
DATA	866	11	16	0	0	A_64_P064888	NM_001127303	822.582	258.573	2.350946e+002	2.373196e+001	286.5	28	8.005568e+000	0	0	0	0	0	0	227.292	1	1	57.5363	30.1765
DATA	867	11	17	0	0	A_44_P522406	NM_001001103	847.938	258.875	3.928505e+001	5.087178e+000	100.5	30	7.886385e+000	0	0	0	0	0	0	38.0991	1	1	45.835	29.4848
DATA	868	11	18	0	0	A_42_P660129	NM_130422	873.418	258.573	7.198790e+001	7.887505e+000	130	32	5.432121e+000	0	0	0	0	0	0	70.0028	1	1	57.5363	31.2143
DATA	869	11	19	0	0	A_64_P035679	A_64_P035679	898.582	258.573	5.647344e+004	5.647345e+003	54272	34	6.384356e+000	0	0	0	0	0	0	55045	1	1	57.5363	34.52
DATA	870	11	20	0	0	A_64_P118862	NM_001191999	924.162	259.088	1.009730e+002	1.059500e+001	161	32	8.326844e+000	0	0	0	0	0	0	98.6248	1	1	46.5243	33.6757
DATA	871	11	21	0	0	A_42_P638181	NM_133395	949.435	258.696	7.869057e+003	7.869122e+002	7397	33	8.908539e+000	0	0	0	0	0	0	7698.61	1	1	46.8651	33.1724
DATA	872	11	22	0	0	A_44_P423803	NM_031144	974.857	258.357	1.631504e+004	1.631507e+003	15986	29	9.662298e+000	0	0	0	0	0	0	15982.7	1	1	46.8651	32.12
DATA	874	11	24	0	0	A_44_P445195	NM_133300	1025.5	258.742	1.683153e+003	1.683456e+002	1701	32	5.158808e+000	0	0	0	0	0	0	1651.78	1	1	46.5243	32.4483
DATA	875	11	25	0	0	A_42_P563276	NM_013093	1051.07	258.662	1.450483e+002	1.485207e+001	204	33	8.402125e+000	0	0	0	0	0	0	142.4	1	1	45.835	32.9355
DATA	876	11	26	0	0	A_42_P535608	NM_001107160	1076.56	258.386	1.407364e+002	1.443122e+001	199	33	8.253902e+000	0	0	0	0	0	0	138.175	1	1	41.8414	33.2424
DATA	877	11	27	0	0	A_44_P233080	ENSRNOT00000026303	1102	258.5	6.752851e+003	6.752927e+002	6610.5	33.5	7.597338e+000	0	0	0	0	0	0	6628.6	1	1	52.3208	32.9333
DATA	878	11	28	0	0	A_43_P13320	NM_138880	1127.54	258.392	1.806459e+001	3.670252e+000	79	29	7.671659e+000	0	0	0	0	0	0	17.7229	1	1	50.1463	31.0811
DATA	879	11	29	0	0	A_42_P548007	NM_001135020	1152.7	258.697	1.138595e+004	1.138599e+003	10916	30.5	9.726371e+000	0	0	0	0	0	0	11162.2	1	1	48.5334	31.4667
DATA	880	11	30	0	0	A_44_P282853	NM_031983	1177.84	258.7	2.548472e+003	2.548673e+002	2423.5	31	7.810613e+000	0	0	0	0	0	0	2495.77	1	1	46.8651	30.5455
DATA	881	11	31	0	0	A_42_P552341	NM_053519	1203.51	258.873	6.018857e+002	6.027384e+001	636	32.5	6.647094e+000	0	0	0	0	0	0	588.655	1	1	47.8731	32.9643
DATA	882	11	32	0	0	A_64_P031476	NM_001107172	1228.73	258.91	1.423433e+002	1.459180e+001	200	35	1.066277e+001	0	0	0	0	0	0	138.994	1	1	45.835	36.1935
DATA	883	11	33	0	0	A_42_P620762	NM_024403	1254.29	258.754	1.959029e+004	1.959032e+003	18875	36	6.886171e+000	0	0	0	0	0	0	19093.3	1	1	45.1352	36
DATA	884	11	34	0	0	A_64_P135370	A_64_P135370	1279.7	258.9	5.171594e+002	5.181626e+001	566	34.5	9.006391e+000	0	0	0	0	0	0	502.991	1	1	47.2035	33.8214
DATA	885	11	35	0	0	A_42_P576202	NM_001108583	1304.87	258.9	1.323159e+003	1.323553e+002	1283	33.5	7.955948e+000	0	0	0	0	0	0	1283.93	1	1	46.8651	33.4167
DATA	886	11	36	0	0	A_64_P022879	NM_001109019	1330.5	259	3.611477e+001	4.850920e+000	100	29	8.579561e+000	0	0	0	0	0	0	34.9536	1	1	54.1152	32.0625
DATA	887	11	37	0	0	A_42_P711589	NM_022948	1355.84	258.854	7.943137e+003	7.943204e+002	7421	30	7.710208e+000	0	0	0	0	0	0	7666.2	1	1	49.8279	31.7742
DATA	888	11	38	0	0	A_64_P007244	A_64_P007244	1381.5	258.813	6.289237e+003	6.289321e+002	6099.5	29	1.153132e+001	0	0	0	0	0	0	6051.49	1	1	49.8279	33.1667
DATA	889	11	39	0	0	A_42_P477625	NM_001108719	1406.43	258.761	4.294489e+003	4.294614e+002	4019	31	9.220319e+000	0	0	0	0	0	0	4119.09	1	1	46.5243	32.7143
DATA	890	11	40	0	0	A_64_P153091	XM_341223	1432.23	258.805	1.144207e+003	1.144676e+002	1116	30	7.377217e+000	0	0	0	0	0	0	1093.68	1	1	50.1463	30.44
DATA	891	11	41	0	0	A_64_P016347	NM_130819	1457.5	259	1.350021e+001	3.557134e+000	74	34	7.858599e+000	0	0	0	0	0	0	12.8582	1	0	65	33.1515
DATA	892	11	42	0	0	A_42_P495598	NM_001014026	1483.01	258.868	8.221402e+000	3.404358e+000	70	30	7.789064e+000	0	0	0	0	0	0	7.80056	1	0	46.8651	30.1481
DATA	893	11	43	0	0	A_42_P759043	NM_001134509	1508.01	259.118	6.532015e+002	6.540429e+001	649	30.5	9.516902e+000	0	0	0	0	0	0	617.378	1	1	46.8651	32.3333
DATA	894	11	44	0	0	A_64_P071595	XM_002728361	1533.5	259	1.223425e+002	1.900499e+001	101	33.5	7.922575e+000	0	1	0	0	0	0	115.154	1	1	54.1152	33.7857
DATA	895	11	45	0	0	A_42_P780882	NM_001008511	1558.92	258.985	7.358495e+003	7.358571e+002	6863	29	1.026489e+001	0	0	0	0	0	0	6896.56	1	1	46.8651	32.5135
DATA	896	11	46	0	0	A_64_P044420	NM_001134983	1584.5	259	9.605777e+001	1.017625e+001	152	33	1.064045e+001	0	0	0	0	0	0	89.6282	1	1	54.1152	35.5882
DATA	897	11	47	0	0	A_64_P000596	NM_001025732	1609.79	258.806	4.484194e+003	4.484321e+002	3925	28	8.079907e+000	0	0	0	0	0	0	4165	1	1	47.5395	29.1481
DATA	898	11	48	0	0	A_44_P468873	ENSRNOT00000015693	1635.5	259	2.858257e+001	4.434637e+000	86	34	9.991497e+000	0	0	0	0	0	0	26.4233	1	1	54.1152	34.1842
DATA	900	11	50	0	0	A_42_P727022	NM_001107076	1686	259	1.184101e+004	1.184106e+003	10514	32	1.048553e+001	0	0	0	0	0	0	10841.5	1	1	51.4001	36.2903
DATA	901	11	51	0	0	A_64_P135604	NM_001009641	1711.3	259.173	3.411229e+003	3.411403e+002	3143	34	8.364158e+000	0	0	0	0	0	0	3107.86	1	1	49.8279	34.3226
DATA	902	11	52	0	0	A_42_P813939	NM_001108741	1736.46	259.099	2.582299e+003	2.582531e+002	2338	37	7.287944e+000	0	0	0	0	0	0	2340.8	1	1	47.8731	35.375
DATA	903	11	53	0	0	A_64_P052494	A_64_P052494	1762.42	259.427	9.340703e+000	3.599271e+000	66	32	6.209913e+000	0	0	0	0	0	0	8.4231	1	0	57.5363	31.7143
DATA	904	11	54	0	0	A_44_P323678	NM_001107651	1787.5	259.352	1.433268e+001	3.776530e+000	73	30	6.565821e+000	0	0	0	0	0	0	12.858	1	0	65	29.88
DATA	905	11	55	0	0	A_44_P435764	NM_001191810	1813	259.455	2.802824e+001	4.493710e+000	84.5	30	6.942108e+000	0	0	0	0	0	0	25.0119	1	1	55.8519	29.0833
DATA	906	11	56	0	0	A_42_P688320	NM_001108569	1838.57	258.71	3.211501e+002	3.230863e+001	339	30	7.520907e+000	0	0	0	0	0	0	285.018	1	1	46.8651	30.2759
DATA	907	11	57	0	0	A_42_P798500	NM_001014023	1863.53	259.216	6.706142e+002	6.715532e+001	648	29.5	7.019625e+000	0	0	0	0	0	0	592.091	1	1	48.8603	30.3571
DATA	908	11	58	0	0	A_44_P279083	NM_133401	1889.42	259.427	6.169190e+002	6.179508e+001	592	28	5.349910e+000	0	0	0	0	0	0	541.723	1	1	57.5363	28.3077
DATA	909	11	59	0	0	A_64_P129850	NM_001002855	1914.58	259.427	3.852850e+001	5.265304e+000	95.5	32	7.422627e+000	0	0	0	0	0	0	33.6518	1	1	57.5363	31.8462
DATA	910	11	60	0	0	A_64_P029468	NM_001105784	1940	259.455	2.529110e+001	4.406266e+000	79	33	5.727228e+000	0	0	0	0	0	0	21.971	1	1	65	32.6364
DATA	911	11	61	0	0	A_43_P18571	NM_001013965	1965.35	259.07	3.827715e+002	3.844869e+001	394	33	6.539216e+000	0	0	0	0	0	0	330.713	1	1	47.5395	33.3429
DATA	912	11	62	0	1	ERCC-00104_60	ERCC-00104_60	1990.51	259.311	1.963074e+001	4.141840e+000	76.5	29	8.789767e+000	0	0	0	0	0	0	16.8717	1	1	42.9674	29.52
DATA	913	11	63	0	0	A_44_P653701	NM_001106536	2016.07	259.188	2.024960e+002	2.057892e+001	236	33	7.903045e+000	0	0	0	0	0	0	173.098	1	1	46.8651	33.3793
DATA	914	11	64	0	0	A_64_P093593	NM_001107077	2041.58	259.427	3.837747e+002	3.855410e+001	372	29	7.798099e+000	0	0	0	0	0	0	326.335	1	1	57.5363	30.8966
DATA	915	11	65	0	0	A_44_P1034793	NM_001008300	2066.8	259.4	9.070363e+002	9.077928e+001	812.5	32.5	9.314178e+000	0	0	0	0	0	0	767.272	1	1	49.1849	34.0526
DATA	916	11	66	0	0	A_42_P768355	NM_057130	2092.25	259.627	1.140001e+003	1.140609e+002	1019	32	8.349112e+000	0	0	0	0	0	0	959.397	1	1	49.1849	33.1786
DATA	917	11	67	0	0	A_44_P714581	NM_001107480	2117.56	259.505	4.868146e+003	4.868290e+002	4015	30.5	8.104415e+000	0	0	0	0	0	0	4076.05	1	1	52.9257	31.1923
DATA	918	11	68	0	0	A_64_P084521	NM_019351	2142.75	259.356	7.123147e+003	7.123246e+002	5771	32	7.652575e+000	0	0	0	0	0	0	5934.4	1	1	48.5334	31.1905
DATA	919	11	69	0	0	A_42_P562625	NM_131913	2168.5	259.5	1.941917e+003	1.942285e+002	1656	30	7.323496e+000	0	0	0	0	0	0	1609.86	1	1	57.5363	30.6786
DATA	920	11	70	0	0	A_42_P468662	NM_001108886	2193.59	259.042	1.523034e+003	1.523508e+002	1265.5	32	9.049399e+000	0	0	0	1	0	0	1256.52	1	1	48.2044	33.9655
DATA	921	11	71	0	0	A_42_P778587	NM_001135767	2219.42	259.427	3.191781e+002	3.214524e+001	324	27	6.808324e+000	0	0	0	0	0	0	262.101	1	1	57.5363	28.2593
DATA	922	11	72	0	0	A_64_P139957	NM_001008525	2244.7	259.1	1.747639e+004	1.747643e+003	14325	34	8.880854e+000	0	0	0	0	0	0	14285.6	1	1	47.2035	32
DATA	923	11	73	0	0	A_44_P318402	NM_001000187	2269.71	259.781	8.519096e+001	9.348884e+000	130	28	7.450049e+000	0	0	0	0	0	0	69.3488	1	1	48.2044	27.6452
DATA	924	11	74	0	0	A_64_P090359	NM_001033565	2295.85	259.507	1.345886e+001	4.094990e+000	68.5	29	7.082224e+000	0	0	0	0	0	0	10.908	1	0	49.8279	30
DATA	925	11	75	0	0	A_43_P17778	NM_001134991	2320.99	259.649	2.518677e+001	4.628174e+000	77	28	7.846235e+000	0	0	0	0	0	0	20.3326	1	1	49.1849	29.7917
DATA	926	11	76	0	0	A_64_P093176	A_64_P093176	2346.33	259.5	6.658762e+001	7.715726e+000	109	28	8.562358e+000	0	0	0	0	0	0	53.5468	1	1	65	29.7742
DATA	927	11	77	0	0	A_64_P100123	NM_182821	2371.56	259.466	4.970323e+003	4.970477e+002	3983.5	30	9.081595e+000	0	0	0	0	0	0	3982.47	1	1	49.1849	32.7586
DATA	928	11	78	0	0	A_44_P426660	NM_001135717	2397.08	259.533	1.089136e+001	4.073700e+000	66	29	7.227309e+000	0	0	0	0	0	0	8.69689	1	0	48.8603	28.6552
DATA	929	11	79	0	0	A_42_P696084	NM_031022	2422.25	259.373	2.478242e+003	2.478555e+002	2070	27	7.973498e+000	0	0	0	1	0	0	1972.58	1	1	46.1809	28.08
DATA	930	11	80	66	1	DarkCorner	DarkCorner	2447.67	259.5	3.962553e+000	3.949512e+000	55	29	6.861401e+000	0	0	0	0	0	0	-2.65934	0	0	57.5363	28.3103
DATA	931	11	81	66	1	DarkCorner	DarkCorner	2473.23	259.935	3.972871e+000	3.959795e+000	58	27	4.862214e+000	0	0	0	0	0	0	-0.0718299	0	0	49.5074	26.6875
DATA	932	11	82	66	1	DarkCorner	DarkCorner	2498.88	259.397	3.983121e+000	3.970012e+000	55	29	9.841212e+000	0	0	0	0	0	0	-2.80887	0	0	42.9674	31.129
DATA	933	11	83	66	1	DarkCorner	DarkCorner	2524	259.545	4.512585e+000	4.003763e+000	59	30	7.005536e+000	0	0	0	0	0	0	3.55549	1	0	55.8519	29.7941
DATA	934	11	84	66	1	DarkCorner	DarkCorner	2549.61	260.091	3.998228e+000	3.987130e+000	60	29.5	4.582378e+000	0	0	0	0	0	0	1.00819	0	0	49.1849	29.0417
DATA	935	11	85	66	1	DarkCorner	DarkCorner	2574.67	259.5	7.055945e+000	4.053548e+000	60	28	7.002313e+000	0	0	0	0	0	0	5.54074	1	0	57.5363	29.3846
DATA	936	12	1	66	1	DarkCorner	DarkCorner	455.468	265.851	5.423436e+000	3.576119e+000	68	26	7.297749e+000	0	0	0	0	0	0	4.8093	1	0	38.2652	26.9143
DATA	937	12	2	66	1	DarkCorner	DarkCorner	479.812	266.159	3.516549e+000	3.505046e+000	63	29	7.500364e+000	0	0	0	0	0	0	0.198142	0	0	46.1809	29.4571
DATA	938	12	3	66	1	DarkCorner	DarkCorner	504.975	265.722	3.487731e+000	3.476252e+000	58	30	6.640237e+000	0	0	0	0	0	0	-1.10099	0	0	48.5334	29.8125
DATA	939	12	4	66	1	DarkCorner	DarkCorner	530.5	266	3.459861e+000	3.448474e+000	58.5	30	8.211803e+000	0	0	0	0	0	0	-2.89377	0	0	54.1152	31.3939
DATA	940	12	5	66	1	DarkCorner	DarkCorner	556.114	265.943	3.433729e+000	3.422428e+000	59	30	6.038764e+000	0	0	0	0	0	0	-3.39209	0	0	46.8651	30
DATA	941	12	6	0	0	A_64_P118227	XM_002728056	581.5	266	2.566157e+001	4.258251e+000	85	31.5	6.699917e+000	0	0	0	0	0	0	23.6704	1	1	54.1152	31
DATA	942	12	7	0	0	A_64_P051317	NM_130425	606.731	265.925	1.834916e+002	1.865708e+001	234.5	31	9.102506e+000	0	0	0	0	0	0	170.383	1	1	45.835	31.5882
DATA	943	12	8	0	0	A_42_P756350	NM_021772	632.5	266	8.530453e+001	9.166174e+000	140	35	9.678487e+000	0	0	0	0	0	0	79.7188	1	1	65	33.8387
DATA	944	12	9	0	0	A_42_P816479	NM_022278	657.438	266.027	1.538896e+004	1.538899e+003	13936	35	8.352042e+000	0	0	0	0	0	0	14464.9	1	1	48.5334	35.8571
DATA	945	12	10	0	0	A_64_P351634	NM_001029901	683	266	3.144504e+002	3.161943e+001	361	36	9.985887e+000	0	0	0	0	0	0	297.209	1	1	54.9904	34.8889
DATA	946	12	11	0	0	A_64_P136597	A_64_P136597	708.5	266	5.830498e+002	5.839826e+001	623	33.5	1.095276e+001	0	0	0	0	0	0	553.917	1	1	54.1152	35.5
DATA	947	12	12	0	0	A_64_P052017	ENSRNOT00000033592	733.5	266	2.708611e+001	4.256915e+000	88.5	29	8.740970e+000	0	0	0	0	0	0	25.8528	1	1	54.1152	30.5926
DATA	948	12	13	0	0	A_44_P444485	TC589779	758.915	265.901	2.314224e+003	2.314455e+002	2208	35	6.155627e+000	0	0	0	0	0	0	2218.48	1	1	46.8651	34.2593
DATA	949	12	14	0	0	A_44_P147373	XM_226249	784.437	265.972	2.242146e+003	2.242382e+002	2144	30	6.744290e+000	0	0	0	0	0	0	2158.01	1	1	48.2044	30.1786
DATA	950	12	15	0	0	A_64_P059939	NM_001134540	809.907	266.065	3.871355e+004	3.871356e+003	36568	31	8.052753e+000	0	0	0	0	0	0	37396.2	1	1	54.4085	31.3056
DATA	951	12	16	0	0	A_42_P637279	NM_012743	835.254	265.556	1.478156e+001	3.556337e+000	74	29.5	8.391968e+000	0	0	0	0	0	0	14.3241	1	0	44.0646	30.3824
DATA	952	12	17	0	0	A_42_P771570	XM_001080365	860.438	266.027	4.402866e+002	4.414663e+001	480	29	6.334748e+000	0	0	0	0	0	0	427.906	1	1	48.5334	30.0645
DATA	953	12	18	0	0	A_43_P12942	NM_053817	885.827	266.08	6.936605e+003	6.936680e+002	6739.5	33	7.370023e+000	0	0	0	0	0	0	6758.71	1	1	47.8731	33.6
DATA	954	12	19	0	0	A_64_P053307	NM_001191900	910.986	266.068	2.553048e+001	4.101492e+000	85.5	34	7.569543e+000	0	0	0	0	0	0	24.9298	1	1	46.8651	34.4444
DATA	955	12	20	0	0	A_42_P595630	NM_001013189	936.543	266.386	4.676885e+003	4.676995e+002	4584	28	8.274149e+000	0	0	0	0	0	0	4575.53	1	1	47.5395	30
DATA	956	12	21	0	0	A_64_P154760	A_64_P154760	962.368	265.735	4.517994e+002	4.529307e+001	508	29	7.912857e+000	0	0	0	0	0	0	442.66	1	1	46.5243	30.5517
DATA	957	12	22	0	0	A_42_P764359	NM_145086	987.288	265.833	1.334392e+003	1.334774e+002	1341	30	1.317662e+001	0	0	0	0	0	0	1308.94	1	1	45.835	34.8333
DATA	958	12	23	0	0	A_43_P10405	NM_001109257	1013.09	266.386	5.244171e+001	6.139463e+000	114	32	7.434623e+000	0	0	0	0	0	0	51.4897	1	1	57.259	33.6176
DATA	959	12	24	0	0	A_44_P269950	ENSRNOT00000014054	1038.5	266.352	3.880150e+001	5.023553e+000	97	32	5.037704e+000	0	0	0	0	0	0	38.118	1	1	57.5363	30.5385
DATA	960	12	25	0	0	A_44_P160763	NM_001106513	1063.58	266.427	1.932980e+002	1.959124e+001	247.5	34	7.808309e+000	0	0	0	0	0	0	189.941	1	1	57.5363	34
DATA	961	12	26	0	0	A_64_P127678	NM_001008553	1089.15	265.723	9.987200e+002	9.992294e+001	1028.5	35	7.221583e+000	0	0	0	0	0	0	981.245	1	1	45.835	34.7143
DATA	962	12	27	0	0	A_42_P684885	NM_133517	1114.58	266.427	1.921283e+001	3.724921e+000	79	32	7.325710e+000	0	0	0	0	0	0	18.8714	1	1	57.5363	32.025
DATA	963	12	28	0	0	A_64_P102708	NM_001034149	1140	266.455	2.652506e+001	4.151198e+000	89	31	7.128829e+000	0	0	0	0	0	0	26.0372	1	1	65	31.0345
DATA	964	12	29	0	0	A_42_P547629	NM_001106718	1165.42	266.427	6.096133e+002	6.104506e+001	652	31	9.078319e+000	0	0	0	0	0	0	597.849	1	1	57.5363	32.6111
DATA	965	12	30	0	0	A_42_P522285	NM_001044263	1190.37	265.735	4.645831e+002	4.656840e+001	481	30.5	6.754819e+000	0	0	0	0	0	0	455.051	1	1	46.5243	30.4
DATA	966	12	31	0	0	A_64_P164423	NM_057193	1216.42	266.427	3.238359e+001	4.555980e+000	93	34	7.582782e+000	0	0	0	0	0	0	31.6743	1	1	57.5363	34.963
DATA	967	12	32	0	0	A_44_P256143	NM_001047917	1241.58	266.427	1.370244e+002	1.407345e+001	191	35	3.413528e+000	0	0	0	0	0	0	133.796	1	1	57.5363	34.5
DATA	968	12	33	0	0	A_44_P727294	NM_001160314	1266.73	266.284	2.441084e+003	2.441295e+002	2308	35	8.294722e+000	0	0	0	0	0	0	2378.89	1	1	48.8603	34.3125
DATA	969	12	34	0	0	A_64_P108404	NM_001000092	1292.42	266.212	6.504281e+001	7.259309e+000	125	37.5	9.131227e+000	0	0	0	0	0	0	63.2439	1	1	46.1809	36
DATA	970	12	35	0	0	A_44_P520829	NM_001108777	1317.48	266.362	7.625829e+002	7.632672e+001	762	29	8.797847e+000	0	0	0	0	0	0	739.723	1	1	47.5395	30.9286
DATA	971	12	36	0	0	A_44_P229677	NM_001014221	1343.07	265.967	1.458836e+003	1.459196e+002	1484	34	1.104982e+001	0	0	0	0	0	0	1411.24	1	1	44.4243	35.2069
DATA	972	12	37	0	0	A_64_P126215	A_64_P126215	1368.58	266.427	1.554087e+001	3.601940e+000	78	34	8.112509e+000	0	0	0	0	0	0	14.9912	1	0	57.5363	34.7931
DATA	973	12	38	0	0	A_64_P090035	A_64_P090035	1393.79	265.69	1.147103e+003	1.147566e+002	1138	30	9.016282e+000	0	0	0	0	0	0	1103.03	1	1	46.8651	31.72
DATA	974	12	39	0	0	A_64_P089330	ENSRNOT00000012374	1419.37	265.735	1.743263e+002	1.773677e+001	225	31	8.788104e+000	0	0	0	0	0	0	167.073	1	1	46.5243	31.6667
DATA	975	12	40	0	0	A_44_P454429	NM_012712	1444.47	265.754	1.191094e+002	1.235480e+001	174	34	8.467131e+000	0	0	0	0	0	0	113.761	1	1	42.2201	31.6667
DATA	976	12	41	0	1	ERCC-00144_60	ERCC-00144_60	1469.94	266.281	1.319209e+001	3.548106e+000	71	31	7.731090e+000	0	0	0	0	0	0	12.5542	1	0	45.4864	30.7714
DATA	977	12	42	0	0	A_42_P759843	XR_086347	1495.06	266.232	4.029576e+003	4.029711e+002	3834.5	30	7.792952e+000	0	0	0	0	0	0	3820.15	1	1	46.5243	30.5128
DATA	978	12	43	0	0	A_43_P14264	NM_053653	1520.89	266.5	8.277354e+002	8.284008e+001	820.5	28	8.517460e+000	0	0	0	0	0	0	781.546	1	1	56.9804	30.9333
DATA	979	12	44	0	0	A_64_P011223	NM_024353	1545.62	266.54	4.960196e+002	4.971383e+001	549	27	6.810475e+000	0	0	0	0	0	0	466.444	1	1	40.6843	29.4848
DATA	980	12	45	0	0	A_42_P701169	NM_001109572	1571.51	266.13	1.627288e+003	1.627632e+002	1570	31	1.199937e+001	0	0	0	0	0	0	1523.44	1	1	47.2035	33.7879
DATA	981	12	46	0	0	A_64_P143307	NM_001014106	1597.33	266.5	2.973091e+002	2.992053e+001	339	34	9.183939e+000	0	0	0	0	0	0	277.091	1	1	57.5363	35.037
DATA	982	12	47	0	0	A_44_P480636	NM_001005381	1622.22	266.333	2.994521e+002	3.013519e+001	331	31	9.227016e+000	0	0	0	0	0	0	277.828	1	1	44.7812	32.5429
DATA	983	12	48	0	0	A_64_P163564	ENSRNOT00000010609	1647.89	266.5	6.591024e+001	7.413790e+000	123	34	9.156158e+000	0	0	0	0	0	0	60.8615	1	1	56.9804	34.0909
DATA	984	12	49	0	0	A_42_P774028	NM_001017447	1673.06	266.389	3.258680e+003	3.258859e+002	2875	35	1.071841e+001	0	0	0	0	0	0	2994.66	1	1	48.2044	36.2069
DATA	985	12	50	0	0	A_43_P20110	ENSRNOT00000050558	1698.58	266.573	3.502580e+001	4.900705e+000	90.5	35	8.434058e+000	0	0	0	0	0	0	32.03	1	1	57.5363	36
DATA	986	12	51	0	0	A_44_P552865	NM_001170399	1724.11	266.5	5.289000e+002	5.300207e+001	524.5	39	8.450247e+000	0	0	0	0	0	0	481.225	1	1	65	37.36
DATA	987	12	52	0	0	A_43_P17428	NM_001012189	1749.25	266.627	3.243149e+002	3.261579e+001	354	36	5.912101e+000	0	0	0	0	0	0	293.601	1	1	46.1809	34.4
DATA	988	12	53	0	0	A_64_P146222	TC633165	1774.68	266	2.428360e+004	2.428363e+003	21538	31.5	6.723814e+000	0	0	0	0	0	0	21868	1	1	48.5334	30.875
DATA	989	12	54	0	0	A_64_P054856	NM_001135894	1800.11	266.352	5.104303e+002	5.116281e+001	518	29	7.016110e+000	0	0	0	0	0	0	457.283	1	1	47.8731	29.3226
DATA	990	12	55	0	0	A_64_P154982	ENSRNOT00000018118	1825.25	266.342	1.465324e+004	1.465328e+003	12730	32	7.701641e+000	0	0	0	0	0	0	13059	1	1	48.2044	30.3793
DATA	991	12	56	0	0	A_42_P726363	NM_031536	1851.11	266.5	3.213746e+001	4.778333e+000	88	29.5	7.773303e+000	0	0	0	0	0	0	28.4871	1	1	56.9804	30
DATA	992	12	57	0	0	A_64_P139685	A_64_P139685	1876.42	266.573	1.390339e+001	3.817206e+000	71	28.5	6.426867e+000	0	0	0	0	0	0	12.2588	1	0	65	29.2308
DATA	993	12	58	0	0	A_64_P114104	NM_001034136	1901.63	266.64	7.156184e+003	7.156274e+002	6219.5	31	6.942581e+000	0	0	0	0	0	0	6276.25	1	1	48.8603	30.7407
DATA	994	12	59	0	0	A_42_P480273	A_42_P480273	1927	266.722	6.419072e+003	6.419173e+002	5451	32	7.108680e+000	0	0	0	0	0	0	5599.7	1	1	47.8731	32
DATA	995	12	60	0	0	A_64_P004344	ENSRNOT00000047696	1952.29	266.754	1.064053e+004	1.064059e+003	9066	34	7.153421e+000	0	0	0	0	0	0	9232.82	1	1	45.1352	33.5
DATA	996	12	61	0	0	A_42_P723584	NM_001109099	1978	266.545	3.599330e+003	3.599513e+002	2987	34	8.382265e+000	0	0	0	1	0	0	3106.13	1	1	55.8519	32.0645
DATA	997	12	62	0	0	A_64_P114813	A_64_P114813	2003.42	266.573	2.797776e+001	4.600201e+000	83	34.5	8.007468e+000	0	0	0	0	0	0	24.0157	1	1	57.5363	32.5333
DATA	998	12	63	0	0	A_64_P034551	NM_053818	2028.58	266.573	1.082319e+002	1.142875e+001	152.5	33	7.621005e+000	0	0	0	0	0	0	92.4182	1	1	57.5363	32.9167
DATA	999	12	64	0	0	A_42_P492976	NM_001126099	2053.97	266.455	3.271145e+002	3.291894e+001	323	30.5	8.720734e+000	0	0	0	0	0	0	277.851	1	1	49.1849	31.9474
DATA	1000	12	65	0	0	A_64_P141799	NM_001025709	2079.44	266.74	1.105458e+003	1.106080e+002	966	32	6.956688e+000	0	0	0	0	0	0	934.16	1	1	49.5074	31.3929
DATA	1001	12	66	0	0	A_44_P337088	NM_133609	2105	266.545	7.790967e+002	7.799884e+001	686.5	34	7.781738e+000	0	0	0	0	0	0	654.963	1	1	55.8519	33.6563
DATA	1002	12	67	0	0	A_64_P137961	A_64_P137961	2130.5	266.648	8.788389e+001	9.553980e+000	134	33.5	8.575220e+000	0	0	0	0	0	0	73.5106	1	1	57.5363	31.8571
DATA	1003	12	68	0	0	A_64_P053822	ENSRNOT00000028268	2155.58	266.573	9.240682e+001	9.978529e+000	133	29.5	7.021189e+000	0	0	0	0	0	0	76.9166	1	1	57.5363	30.4167
DATA	1004	12	69	0	0	A_42_P484456	NM_001106601	2181	266.569	3.594487e+003	3.594686e+002	2975.5	32	7.181817e+000	0	0	0	1	0	0	2977.51	1	1	44.7812	31.3871
DATA	1005	12	70	0	0	A_44_P508632	NM_001107594	2206.61	266.403	2.876901e+001	4.767906e+000	85	30	5.704117e+000	0	0	0	0	0	0	23.7171	1	1	43.7019	30.5862
DATA	1006	12	71	0	0	A_64_P080598	NM_001047865	2232.39	266.716	5.017328e+001	6.305772e+000	98	31	7.509458e+000	0	0	0	0	0	0	41.1741	1	1	47.8731	30.5667
DATA	1007	12	72	0	0	A_64_P144243	A_64_P144243	2257.32	266.704	1.766784e+001	4.223536e+000	71	33	8.609319e+000	0	0	0	0	0	0	14.4359	1	0	47.5395	29.75
DATA	1008	12	73	0	0	A_44_P479917	NM_030864	2282.63	266.972	2.434941e+001	4.557376e+000	77	28.5	5.948078e+000	0	0	0	0	0	0	19.812	1	1	48.2044	28.75
DATA	1009	12	74	0	0	A_44_P974524	NM_001025764	2308.3	266.776	4.509572e+001	5.941548e+000	95	30	6.267767e+000	0	0	0	0	0	0	36.5387	1	1	45.835	30.8519
DATA	1010	12	75	0	0	A_42_P522899	NM_021578	2333.66	266.794	9.516315e+001	1.027830e+001	135	28	8.646974e+000	0	0	0	0	0	0	76.8048	1	1	46.5243	29.4375
DATA	1011	12	76	0	0	A_64_P069892	NM_019201	2358.86	266.808	2.945876e+004	2.945878e+003	23067.5	28	4.290053e+000	0	0	0	0	0	0	23688.1	1	1	47.5395	27.5926
DATA	1012	12	77	0	0	A_44_P415199	NM_001108748	2384.47	266.88	2.959555e+001	4.905259e+000	81.5	30	8.894704e+000	0	0	0	0	0	0	23.7143	1	1	48.8603	31.4828
DATA	1013	12	78	0	0	A_64_P034610	NM_022622	2409.59	266.958	1.530964e+002	1.580465e+001	178	30	1.012325e+001	0	0	0	0	0	0	122.276	1	1	48.2044	30.0357
DATA	1014	12	79	0	0	A_42_P473828	ENSRNOT00000035309	2434.79	266.806	2.896943e+003	2.897211e+002	2380	27.5	1.040346e+001	0	0	0	1	0	0	2306.66	1	1	47.5395	29.1667
DATA	1015	12	80	66	1	DarkCorner	DarkCorner	2460.33	266.806	3.960800e+000	3.947764e+000	53	27	4.890179e+000	0	0	0	0	0	0	-5.15529	0	0	45.835	27.0769
DATA	1016	12	81	66	1	DarkCorner	DarkCorner	2486	267	3.970814e+000	3.957745e+000	54	27.5	7.563645e+000	0	0	0	0	0	0	-3.7481	0	0	54.9904	27.8611
DATA	1017	12	82	66	1	DarkCorner	DarkCorner	2511.5	267	3.979863e+000	3.966765e+000	55	30	6.031431e+000	0	0	0	0	0	0	-2.43167	0	0	65	29.3667
DATA	1018	12	83	66	1	DarkCorner	DarkCorner	2537.12	267.377	3.987419e+000	3.974296e+000	56	30	5.117134e+000	0	0	0	0	0	0	-0.458705	0	0	46.1809	30.4333
DATA	1019	12	84	66	1	DarkCorner	DarkCorner	2562.09	267.065	3.994294e+000	3.991926e+000	59	28	6.651975e+000	0	0	0	0	0	0	2.308	0	0	54.4085	30.0345
DATA	1020	12	85	66	1	DarkCorner	DarkCorner	2587.5	267	8.853188e+000	4.083737e+000	64	27	7.266490e+000	0	0	0	0	0	0	6.96084	1	0	54.1152	27.1771
DATA	1021	13	1	66	1	DarkCorner	DarkCorner	441.5	273	3.560505e+000	3.562569e+000	64.5	25	7.921283e+000	0	0	0	0	0	0	2.76526	0	0	54.1152	26.0506
DATA	1022	13	2	66	1	DarkCorner	DarkCorner	467.028	272.986	3.528537e+000	3.524627e+000	63	31	8.350771e+000	0	0	0	0	0	0	2.07581	0	0	46.8651	31.8462
DATA	1023	13	3	66	1	DarkCorner	DarkCorner	492.5	273	3.498411e+000	3.486897e+000	61	31	7.054158e+000	0	0	0	0	0	0	-2.039	0	0	54.1152	30.7647
DATA	1024	13	4	66	1	DarkCorner	DarkCorner	518.184	272.763	3.469902e+000	3.464390e+000	62	30	7.917856e+000	0	0	0	0	0	0	1.83302	0	0	48.2044	31.8857
DATA	1025	13	5	66	1	DarkCorner	DarkCorner	543.418	273.427	3.443145e+000	3.431813e+000	61.5	28	8.609217e+000	0	0	0	0	0	0	-0.530081	0	0	57.5363	30.2162
DATA	1026	13	6	0	0	A_64_P029912	NM_001109143	568.754	272.855	2.394745e+002	2.418862e+001	279	32.5	5.923941e+000	0	0	0	0	0	0	220.308	1	1	46.1809	31.0455
DATA	1027	13	7	0	0	A_42_P574731	NM_012948	593.942	272.768	4.677316e+003	4.677438e+002	4242	31	8.473488e+000	0	0	0	0	0	0	4332.4	1	1	46.5243	32.8333
DATA	1028	13	8	0	0	A_44_P137448	NM_017043	619.551	272.899	5.041388e+002	5.052585e+001	517.5	34	9.340771e+000	0	0	0	1	0	0	470.031	1	1	47.5395	33
DATA	1029	13	9	0	0	A_42_P770614	NM_001013235	644.807	273.43	4.667808e+004	4.667809e+003	43110.5	36	1.087785e+001	0	0	0	0	0	0	43786.7	1	1	58.0869	36.4483
DATA	1030	13	10	0	0	A_42_P785419	NM_199501	670.045	272.667	2.282864e+002	2.306921e+001	276	32.5	9.761914e+000	0	0	0	0	0	0	215.34	1	1	45.4864	33.4643
DATA	1031	13	11	0	0	A_42_P581043	TC622715	695.6	273.147	1.016228e+004	1.016234e+003	9512	34.5	9.848589e+000	0	0	0	0	0	0	9637.72	1	1	48.8603	36.4286
DATA	1032	13	12	0	0	A_64_P098532	NM_001029928	721	273.455	2.930693e+001	4.405128e+000	88.5	32	7.660596e+000	0	0	0	0	0	0	27.9319	1	1	55.8519	31.4483
DATA	1033	13	13	0	0	A_64_P090758	A_64_P090758	746.632	272.735	1.242929e+003	1.243360e+002	1243	31	8.394447e+000	0	0	0	0	0	0	1189.94	1	1	46.5243	31.2813
DATA	1034	13	14	0	0	A_43_P12079	NM_021583	771.657	272.687	1.010214e+002	1.061534e+001	161	31	6.823583e+000	0	0	0	0	0	0	97.1107	1	1	45.835	30.8065
DATA	1035	13	15	0	0	A_64_P001947	A_64_P001947	797.418	273.427	2.573709e+001	4.144069e+000	85	29	6.461571e+000	0	0	0	0	0	0	24.8378	1	1	57.5363	29.2424
DATA	1036	13	16	0	0	A_64_P064461	A_64_P064461	822.582	273.427	6.011454e+001	6.827572e+000	120	32	8.989393e+000	0	0	0	0	0	0	58.2108	1	1	57.5363	31.4667
DATA	1037	13	17	0	0	A_42_P575398	NM_020538	848	273.455	4.775365e+000	3.262237e+000	67.5	30	8.910849e+000	0	0	0	0	0	0	4.63833	1	0	55.8519	29.875
DATA	1038	13	18	0	0	A_42_P482623	NM_199463	873.418	273.427	1.920789e+003	1.921059e+002	1920	29	6.072739e+000	0	0	0	0	0	0	1870.72	1	1	57.5363	30.1333
DATA	1039	13	19	0	0	A_42_P738431	NM_019175	898.5	273.5	1.549870e+003	1.550203e+002	1523	35.5	7.791577e+000	0	0	0	0	0	0	1513	1	1	49.1849	35.5313
DATA	1040	13	20	0	0	A_44_P1027780	ENSRNOT00000065815	924.418	273.427	3.898151e+001	5.046094e+000	100	30	7.199673e+000	0	0	0	0	0	0	38.1323	1	1	57.5363	31.4
DATA	1041	13	21	0	0	A_42_P479802	NM_053679	949.243	273	2.218028e+003	2.218259e+002	2253	29	8.298903e+000	0	0	0	0	0	0	2173.18	1	1	46.8651	30.4444
DATA	1042	13	22	0	0	A_44_P496624	NM_022302	974.859	273.141	1.230364e+002	1.271165e+001	183.5	29	9.396316e+000	0	0	0	0	0	0	120.715	1	1	46.8651	30.0571
DATA	1043	13	23	0	0	A_42_P700753	FQ212883	1000.15	273.164	2.096537e+003	2.096780e+002	2126	31	7.239945e+000	0	0	0	0	0	0	2059.1	1	1	47.5395	32.3714
DATA	1044	13	24	0	0	A_44_P229299	NM_001100678	1025.8	273.239	5.163840e+002	5.173678e+001	565.5	34	8.354814e+000	0	0	0	0	0	0	507.533	1	1	46.8651	34.6071
DATA	1045	13	25	0	0	A_42_P728472	NM_001007600	1050.69	273.338	8.799352e+003	8.799410e+002	8454	32.5	5.810810e+000	0	0	0	0	0	0	8652.04	1	1	48.5334	31.4
DATA	1046	13	26	0	0	A_42_P488904	NM_001108947	1076.28	273.2	1.273320e+004	1.273324e+003	12120	34	6.625076e+000	0	0	0	0	0	0	12521.1	1	1	49.1849	33.0345
DATA	1047	13	27	0	0	A_42_P458494	NM_001034951	1101.5	273.5	1.180771e+002	1.223053e+001	179.5	35	7.014541e+000	0	0	0	0	0	0	116.092	1	1	49.1849	34.8205
DATA	1048	13	28	0	0	A_64_P100331	ENSRNOT00000048614	1127.64	273.324	4.579627e+001	5.580991e+000	102	31	8.112621e+000	0	0	0	0	0	0	45.0029	1	1	48.5334	31.0588
DATA	1049	13	29	0	0	A_64_P113989	NM_181631	1152.56	273.027	1.601626e+004	1.601629e+003	15105.5	31	8.480763e+000	0	0	0	0	0	0	15726.4	1	1	48.5334	33.56
DATA	1050	13	30	0	0	A_64_P042105	ENSRNOT00000061599	1178.33	273.5	4.582339e+001	5.586499e+000	108	30	6.282963e+000	0	0	0	0	0	0	44.9487	1	1	57.5363	31.3714
DATA	1051	13	31	0	0	A_64_P044435	NM_001015020	1203.51	273.427	6.875527e+002	6.882968e+001	727	31	7.555237e+000	0	0	0	0	0	0	673.544	1	1	49.1849	32.5667
DATA	1052	13	32	0	0	A_64_P149011	NM_031352	1228.63	273.37	5.102593e+003	5.102693e+002	4841	34	7.063008e+000	0	0	0	0	0	0	4990.83	1	1	48.2044	34.7188
DATA	1053	13	33	0	0	A_42_P580844	NM_019296	1254.12	273.527	3.994062e+002	4.006944e+001	453.5	35	5.085032e+000	0	0	0	0	0	0	389.95	1	1	48.8603	35.6296
DATA	1054	13	34	0	0	A_64_P052972	A_64_P052972	1279.72	273.38	1.945371e+002	1.971795e+001	248.5	38	1.019887e+001	0	0	0	0	0	0	189.532	1	1	47.8731	36.7273
DATA	1055	13	35	0	0	A_44_P454300	NM_001003979	1305.11	273.5	8.325232e+000	3.330395e+000	68.5	30	8.304400e+000	0	0	0	0	0	0	8.09243	1	0	56.9804	31.9655
DATA	1056	13	36	0	0	A_44_P149743	ENSRNOT00000005476	1330.53	273.544	1.273237e+001	3.474547e+000	73	29	7.869158e+000	0	0	0	0	0	0	12.345	1	0	46.5243	31.069
DATA	1057	13	37	0	0	A_42_P841017	NM_173309	1355.57	273.392	8.793450e+003	8.793510e+002	8232	32.5	1.029441e+001	0	0	0	0	0	0	8502.57	1	1	49.1849	33.6563
DATA	1058	13	38	0	0	A_44_P206844	NM_013074	1381.32	273.412	1.753866e+002	1.783752e+001	232	32.5	9.155678e+000	0	0	0	0	0	0	169.075	1	1	46.8651	33.6333
DATA	1059	13	39	0	0	A_64_P073400	NM_001000705	1406.44	273.091	1.592971e+002	1.626025e+001	215.5	32	8.228350e+000	0	0	0	0	0	0	153.076	1	1	45.4864	32.1333
DATA	1060	13	40	0	0	A_64_P066676	A_64_P066676	1431.9	273.694	1.965524e+001	3.817559e+000	78	32	5.344764e+000	0	0	0	0	0	0	18.8253	1	1	44.7812	32.069
DATA	1061	13	41	0	0	A_44_P386965	NM_001134594	1457.55	273.449	1.245371e+001	3.512764e+000	74.5	33	9.143789e+000	0	0	0	0	0	0	11.8846	1	0	47.2035	33.0625
DATA	1062	13	42	0	0	A_64_P095895	NM_019338	1482.56	273.533	1.295704e+002	1.336986e+001	181.5	31	6.808695e+000	0	0	0	0	0	0	123.195	1	1	49.5074	30.475
DATA	1063	13	43	1028	1	(+)E1A_r60_a22	E1A_r60_a22	1508.82	273.585	1.241660e+002	1.285023e+001	180.5	30	8.196728e+000	0	0	0	0	0	0	117.581	1	1	51.0895	31.0526
DATA	1064	13	44	0	0	A_42_P541625	NM_001126090	1533.31	273.662	2.439609e+004	2.439611e+003	22695	26.5	5.646646e+000	0	0	0	0	0	0	23011.8	1	1	48.5334	27.2692
DATA	1065	13	45	0	0	A_64_P033895	NM_001126084	1558.79	273.521	2.801953e+002	2.821757e+001	312	28	1.009296e+001	0	0	0	0	0	0	263.172	1	1	48.2044	31.4865
DATA	1066	13	46	0	0	A_64_P012546	NM_022300	1584.42	273.573	7.122558e+004	7.122559e+003	65865	37.5	1.115652e+001	0	0	0	0	0	0	66604.3	1	1	57.5363	36.3235
DATA	1067	13	47	0	0	A_42_P495598	NM_001014026	1609.58	273.573	1.058519e+001	3.529448e+000	70	30	9.639329e+000	0	0	0	0	0	0	9.85428	1	0	57.5363	33.6
DATA	1068	13	48	0	0	A_42_P483463	NM_001130999	1634.8	273.508	5.218029e+003	5.218139e+002	4654	29	9.504783e+000	0	0	0	0	0	0	4835.39	1	1	45.4864	32.1818
DATA	1069	13	49	0	0	A_42_P575104	NM_153737	1660.67	273.781	4.034203e+003	4.034346e+002	3781	35	7.475533e+000	0	0	0	0	0	0	3720.5	1	1	48.2044	35.5714
DATA	1070	13	50	0	0	A_42_P461726	NM_133549	1686	273.545	2.923339e+001	4.495655e+000	86	32.5	9.723133e+000	0	0	0	0	0	0	26.8289	1	1	55.8519	36.0938
DATA	1071	13	51	0	0	A_64_P098688	A_64_P098688	1711.5	273.648	8.791488e+004	8.791489e+003	80682.5	39	6.079282e+000	0	0	0	0	0	0	80285.2	1	1	57.5363	39.0714
DATA	1072	13	52	0	0	A_64_P105797	A_64_P105797	1736.64	273.813	5.614589e+001	6.589548e+000	108	36	7.327515e+000	0	0	0	0	0	0	51.0197	1	1	49.5074	35.6774
DATA	1073	13	53	0	0	A_42_P545943	NM_019291	1761.84	273.897	5.707208e+003	5.707313e+002	5029	33.5	6.116807e+000	0	0	0	0	0	0	5159.98	1	1	46.5243	33.5625
DATA	1074	13	54	0	0	A_44_P520045	NM_001001371	1787.59	273.844	1.131100e+002	1.183576e+001	163	29	5.653051e+000	0	0	0	0	0	0	101.728	1	1	44.7812	28.9032
DATA	1075	13	55	0	0	A_44_P306964	NM_001012184	1812.91	273.935	4.594247e+001	5.777599e+000	102	31	9.781907e+000	0	0	0	0	0	0	41.1052	1	1	54.4085	32.8333
DATA	1076	13	56	0	0	A_44_P156043	NM_001039012	1837.94	273.531	2.012103e+003	2.012411e+002	1859	32	7.215180e+000	0	0	0	0	0	0	1790.78	1	1	44.0646	32
DATA	1077	13	57	0	0	A_64_P054686	TC585752	1863.56	274.027	2.420585e+004	2.420588e+003	21236	28	5.512483e+000	0	0	0	0	0	0	21430	1	1	48.5334	27.8148
DATA	1078	13	58	0	0	A_42_P575104	NM_153737	1888.85	273.903	4.155383e+003	4.155535e+002	3554.5	31	9.012021e+000	0	0	0	0	0	0	3659.28	1	1	46.8651	33.2963
DATA	1079	13	59	0	0	A_64_P142194	NM_053426	1914.44	274.027	1.766994e+003	1.767356e+002	1550	31	7.089899e+000	0	0	0	0	0	0	1547.71	1	1	48.5334	30
DATA	1080	13	60	0	0	A_64_P043314	A_64_P043314	1940	274	9.355639e+001	1.002363e+001	140	32	5.585395e+000	0	0	0	0	0	0	81.5053	1	1	54.9904	31.5429
DATA	1081	13	61	0	0	A_44_P684315	NM_001109104	1965.5	274	4.634138e+004	4.634139e+003	38608	34	5.924877e+000	0	0	0	0	0	0	40156.1	1	1	54.1152	33.6667
DATA	1082	13	62	0	0	A_64_P142620	NM_201417	1990.59	273.817	6.743948e+001	7.661923e+000	120	31	8.679714e+000	0	0	0	0	0	0	58.1294	1	1	47.5395	31.1379
DATA	1083	13	63	0	0	A_42_P568419	NM_001011894	2015.99	273.905	2.340020e+003	2.340305e+002	2064	35.5	8.015502e+000	0	0	0	0	0	0	2006.37	1	1	46.8651	35.4
DATA	1084	13	64	0	0	A_42_P519868	NM_053906	2041.14	273.985	7.717453e+001	8.547681e+000	124	32	8.944272e+000	0	0	0	1	0	0	65.8284	1	1	45.835	33.6667
DATA	1085	13	65	0	0	A_43_P12346	NM_022943	2067	274	1.316224e+002	1.367084e+001	172.5	30	7.447615e+000	0	0	0	0	0	0	111.679	1	1	54.9904	30.7568
DATA	1087	13	67	0	0	A_44_P556989	NM_012610	2117.5	274	6.578433e+001	7.563225e+000	113	34	8.561878e+000	0	0	0	0	0	0	55.2544	1	1	54.1152	32.7333
DATA	1088	13	68	0	0	A_64_P113079	XM_218149	2143.09	274.065	1.542128e+001	4.055170e+000	72	34	7.008135e+000	0	0	0	0	0	0	12.8884	1	0	54.4085	32.037
DATA	1089	13	69	0	0	A_64_P003937	NM_173111	2168.16	273.882	5.214710e+003	5.214846e+002	4265.5	30	6.796297e+000	0	0	0	0	0	0	4337.16	1	1	46.5243	30.5
DATA	1090	13	70	0	0	A_42_P771337	NM_001012015	2194.23	273.862	8.105645e+001	8.946726e+000	125.5	29.5	5.505770e+000	0	0	0	0	0	0	67.0877	1	1	45.835	29.4063
DATA	1091	13	71	0	0	A_44_P401035	A_44_P401035	2219.5	274	6.631836e+001	7.645608e+000	115	29	6.738713e+000	0	0	0	0	0	0	54.6393	1	1	54.1152	30.2222
DATA	1092	13	72	0	0	A_42_P536292	NM_033359	2244.5	274	7.331431e+002	7.341383e+001	660.5	32	8.829743e+000	0	0	0	0	0	0	601.37	1	1	48.5334	30.3667
DATA	1093	13	73	0	0	A_44_P128564	NM_001109121	2270.09	274.065	1.975005e+002	2.011951e+001	218	30	9.882645e+000	0	0	0	0	0	0	161.298	1	1	54.4085	31.5
DATA	1094	13	74	0	0	A_64_P069957	NM_173315	2295.18	274.132	3.036451e+001	4.906295e+000	82	30	6.113665e+000	0	0	0	0	0	0	24.697	1	1	46.1809	30.4242
DATA	1095	13	75	0	0	A_44_P538691	NM_031772	2320.61	274.069	1.255394e+002	1.313670e+001	161	30	7.541662e+000	0	0	0	0	0	0	101.698	1	1	53.8203	29.72
DATA	1096	13	76	0	0	A_44_P499231	NM_001034148	2346.5	274	4.121991e+002	4.140253e+001	393	28	8.181881e+000	0	0	0	0	0	0	332.619	1	1	54.1152	29.5455
DATA	1097	13	77	0	0	A_64_P121489	XM_001065883	2371.5	274	1.308276e+001	4.111915e+000	70	29	5.461077e+000	0	0	0	0	0	0	10.5196	1	0	54.1152	28.1481
DATA	1098	13	78	0	0	A_42_P507072	FQ213070	2396.94	274.232	4.905688e+003	4.905844e+002	3957	30	6.627306e+000	0	0	0	0	0	0	3931.4	1	1	46.5243	29.7241
DATA	1099	13	79	0	0	A_64_P120075	ENSRNOT00000027841	2422.42	273.913	2.931888e+002	2.958031e+001	291	33	5.833459e+000	0	0	0	0	0	0	234.197	1	1	46.8651	32.8421
DATA	1100	13	80	0	0	A_44_P1007362	NM_138864	2447.58	274.136	2.403185e+002	2.435191e+001	248	26.5	6.719941e+000	0	0	0	0	0	0	191.42	1	1	42.9674	26.875
DATA	1101	13	81	66	1	DarkCorner	DarkCorner	2473.02	274.59	3.958312e+000	3.945284e+000	49	27	6.425333e+000	0	0	0	0	0	0	-7.86049	0	0	51.0895	25.8519
DATA	1102	13	82	66	1	DarkCorner	DarkCorner	2498.58	274.427	3.968040e+000	3.954980e+000	55	29	9.256615e+000	0	0	0	0	0	0	-3.67549	0	0	65	29.9722
DATA	1103	13	83	66	1	DarkCorner	DarkCorner	2524	274.455	3.976423e+000	3.963336e+000	57	30.5	5.341660e+000	0	0	0	0	0	0	-0.193851	0	0	55.8519	31.4667
DATA	1104	13	84	66	1	DarkCorner	DarkCorner	2549.42	274.427	3.983697e+000	3.970586e+000	54.5	28	6.539259e+000	0	0	0	0	0	0	-1.9395	0	0	57.5363	28.8095
DATA	1105	13	85	66	1	DarkCorner	DarkCorner	2574.94	273.953	3.990218e+000	3.983816e+000	60	27	8.081841e+000	0	0	0	0	0	0	1.82436	0	0	46.1809	28.0444
DATA	1106	14	1	66	1	DarkCorner	DarkCorner	454.5	280.269	3.540309e+000	3.545707e+000	64	31.5	8.792414e+000	0	0	0	0	0	0	3.08509	0	0	50.4627	30.1316
DATA	1107	14	2	66	1	DarkCorner	DarkCorner	480.086	280.386	3.509275e+000	3.497846e+000	62	29	9.066303e+000	0	0	0	0	0	0	0.259984	0	0	47.2035	30.7419
DATA	1108	14	3	66	1	DarkCorner	DarkCorner	505.329	280.376	3.480444e+000	3.468989e+000	57	33	7.689565e+000	0	0	0	0	0	0	-4.7234	0	0	52.0157	31.6
DATA	1109	14	4	66	1	DarkCorner	DarkCorner	530.582	280.573	3.453172e+000	3.441807e+000	58	31	9.608576e+000	0	0	0	0	0	0	-2.71791	0	0	57.5363	31.5161
DATA	1110	14	5	66	1	DarkCorner	DarkCorner	556.645	280.145	3.426996e+000	3.415717e+000	60	31	5.510889e+000	0	0	0	0	0	0	-1.41452	0	0	49.8279	30.6452
DATA	1111	14	6	0	0	A_64_P151415	NM_001191684	581.413	280.28	2.831382e+002	2.851631e+001	322	28.5	7.251251e+000	0	0	0	0	0	0	261.626	1	1	48.8603	28.75
DATA	1112	14	7	0	0	A_42_P475623	NM_053394	606.803	280.535	1.149840e+003	1.150333e+002	1088	30	7.729733e+000	0	0	0	0	0	0	1069.61	1	1	47.5395	30.9655
DATA	1113	14	8	0	0	A_44_P123636	ENSRNOT00000023689	632.418	280.573	8.809808e+000	3.462362e+000	69	31	1.080548e+001	0	0	0	0	0	0	8.24698	1	0	65	33.0385
DATA	1114	14	9	0	0	A_64_P135207	ENSRNOT00000043866	657.582	280.573	2.456591e+002	2.479045e+001	297.5	33.5	1.018889e+001	0	0	0	0	0	0	231.304	1	1	57.5363	33.5357
DATA	1115	14	10	0	0	A_42_P516693	NM_001107330	683	280.545	1.722401e+001	3.732080e+000	78	32.5	9.732839e+000	0	0	0	0	0	0	16.3065	1	1	65	34.6176
DATA	1116	14	11	0	0	A_64_P125447	NM_001109231	708.397	280.315	1.248920e+002	1.291632e+001	181	32.5	8.787542e+000	0	0	0	0	0	0	118.839	1	1	48.5334	33.5357
DATA	1117	14	12	0	0	A_42_P701756	NM_001107646	733.563	280.521	2.240325e+003	2.240565e+002	2127.5	32	7.318770e+000	0	0	0	0	0	0	2141.75	1	1	48.2044	30.7576
DATA	1118	14	13	0	0	A_44_P344181	NM_017204	758.905	280.206	8.727655e+002	8.733759e+001	901	32.5	7.713682e+000	0	0	0	0	0	0	837.949	1	1	45.4864	31.1176
DATA	1119	14	14	0	0	A_64_P035330	ENSRNOT00000066415	784.408	280.254	4.830577e+002	4.841509e+001	530	30	6.340326e+000	0	0	0	0	0	0	465.637	1	1	47.5395	30.5641
DATA	1120	14	15	0	0	A_42_P837533	NM_001134546	809.87	280.377	6.772597e+003	6.772675e+002	6468	30	8.906926e+000	0	0	0	0	0	0	6552	1	1	46.8651	31
DATA	1121	14	16	0	0	A_42_P744291	NM_001025729	835.457	280.614	1.930666e+003	1.930936e+002	1905	30	8.436225e+000	0	0	0	0	0	0	1873.91	1	1	47.5395	30.3548
DATA	1122	14	17	0	0	A_44_P149267	NM_001013099	860.582	280.573	2.888739e+001	4.326070e+000	91	31	5.388877e+000	0	0	0	0	0	0	28.118	1	1	57.5363	31.04
DATA	1123	14	18	0	0	A_64_P002546	NM_144741	886.367	280.596	1.681696e+001	3.625613e+000	77.5	31	6.282190e+000	0	0	0	0	0	0	16.4111	1	1	57.8122	31.1818
DATA	1124	14	19	0	0	A_42_P808236	NM_001107189	911.106	281.273	1.033373e+002	1.081932e+001	162.5	31.5	6.894628e+000	0	0	0	0	0	0	101.065	1	1	45.835	31.95
DATA	1125	14	20	0	0	A_44_P425848	NM_001108747	936.439	280.894	5.878405e+002	5.887104e+001	620	30	7.240280e+000	0	0	0	0	0	0	575.957	1	1	45.4864	30.963
DATA	1126	14	21	0	0	A_43_P17405	TC612613	962	280.652	1.508367e+002	1.541821e+001	207	30	9.755218e+000	0	0	0	0	0	0	148.01	1	1	45.4864	31.4167
DATA	1127	14	22	0	0	A_64_P022402	NM_001142304	987.623	280.565	2.517940e+001	4.064425e+000	84	29	7.886852e+000	0	0	0	0	0	0	24.7371	1	1	46.8651	30.5385
DATA	1128	14	23	0	0	A_44_P1019726	ENSRNOT00000025138	1013.09	280.935	2.159893e+002	2.183289e+001	275.5	34	7.339064e+000	0	0	0	0	0	0	212.389	1	1	54.4085	34.1622
DATA	1129	14	24	0	0	A_44_P128186	NM_053305	1038.29	280.754	1.388952e+002	1.425022e+001	197	32	6.814174e+000	0	0	0	0	0	0	136.653	1	1	45.1352	30.7917
DATA	1130	14	25	0	0	A_44_P203665	NM_001105725	1063.76	280.742	1.458100e+002	1.492482e+001	203.5	32	6.477783e+000	0	0	0	0	0	0	143.493	1	1	45.1352	31.0882
DATA	1131	14	26	0	0	A_42_P688802	DV723748	1088.86	280.803	3.810687e+003	3.810820e+002	3671	34	7.021631e+000	0	0	0	0	0	0	3750.01	1	1	46.8651	34.4054
DATA	1132	14	27	0	0	A_64_P129943	NM_001105712	1114.29	280.754	3.737120e+002	3.750678e+001	426	33	8.146245e+000	0	0	0	0	0	0	367.638	1	1	45.1352	33.2632
DATA	1133	14	28	0	0	A_64_P017577	NM_001106982	1140	281	3.362167e+001	4.633435e+000	94.5	32	1.306536e+001	0	0	0	0	0	0	33.0554	1	1	65	35.5
DATA	1134	14	29	0	0	A_44_P235926	NM_024138	1165.01	280.716	2.330903e+002	2.352645e+001	296	32	8.228676e+000	0	0	0	0	0	0	228.955	1	1	45.835	33.0556
DATA	1135	14	30	0	0	A_42_P611638	NM_001034137	1190.73	280.781	1.351642e+003	1.352020e+002	1304	30	7.722228e+000	0	0	0	0	0	0	1326.1	1	1	48.2044	32.0588
DATA	1136	14	31	0	0	A_42_P654878	NM_001107919	1216.28	280.764	2.067671e+003	2.067918e+002	2000	33	7.499747e+000	0	0	0	0	0	0	2025.68	1	1	47.5395	35.0606
DATA	1137	14	32	0	0	A_64_P017464	NM_001135687	1241.79	280.789	9.331396e+000	3.337975e+000	69	35	3.246774e+000	0	0	0	0	0	0	9.12641	1	0	46.8651	34.6923
DATA	1138	14	33	0	0	A_64_P152873	NM_001207022	1267	281	6.199692e+001	6.981876e+000	119	37	7.684336e+000	0	0	0	0	0	0	60.52	1	1	65	35.7353
DATA	1139	14	34	0	0	A_64_P013243	A_64_P013243	1292.17	281	7.580494e+003	7.580563e+002	7339	36	9.795156e+000	0	0	0	0	0	0	7383.96	1	1	46.8651	35.8485
DATA	1140	14	35	0	0	A_64_P029720	NM_001109405	1317.5	281	1.871812e+002	1.899403e+001	243	29	8.452667e+000	0	0	0	0	0	0	181.891	1	1	54.1152	31.1875
DATA	1141	14	36	0	0	A_43_P13459	NM_001107548	1343.08	281	2.099753e+002	2.124515e+001	266	34	9.772775e+000	0	0	0	0	0	0	203.501	1	1	46.8651	34.2593
DATA	1142	14	37	0	0	A_64_P053923	NM_001107323	1368.36	280.742	1.750052e+003	1.750352e+002	1669	34	1.020335e+001	0	0	0	0	0	0	1691.23	1	1	46.1809	34.5862
DATA	1143	14	38	0	0	A_44_P1005199	ENSRNOT00000032786	1394.1	280.952	6.461002e+001	7.233934e+000	125	30.5	7.924989e+000	0	0	0	0	0	0	62.2466	1	1	45.1352	31.0313
DATA	1144	14	39	0	0	A_44_P104821	NM_024369	1419.1	280.667	1.492340e+002	1.527619e+001	206	33.5	6.105431e+000	0	0	0	0	0	0	143.309	1	1	45.1352	33.2353
DATA	1145	14	40	0	0	A_64_P009956	A_64_P009956	1444.64	280.87	4.278487e+002	4.291006e+001	479	32	8.893758e+000	0	0	0	0	0	0	409.45	1	1	46.8651	32.1471
DATA	1146	14	41	0	0	A_64_P060947	NM_203334	1470.21	280.958	3.601928e+001	4.876506e+000	97.5	33	6.185236e+000	0	0	0	0	0	0	34.3448	1	1	46.8651	33.5143
DATA	1147	14	42	0	0	A_64_P103419	NM_001106291	1495.5	281	1.979843e+001	3.848168e+000	77	29	6.870749e+000	0	0	0	0	0	0	18.8066	1	1	54.1152	30.0455
DATA	1148	14	43	0	0	A_44_P220827	NM_001012051	1520.97	280.743	1.060521e+003	1.061038e+002	1041	28	8.703377e+000	0	0	0	0	0	0	1003.35	1	1	47.8731	30.9655
DATA	1149	14	44	0	1	ETG07_105829	ETG07_105829	1545.94	281	8.298173e+000	3.428403e+000	68	25	3.599398e+000	0	0	0	0	0	0	7.81928	1	0	46.8651	26.2069
DATA	1150	14	45	0	0	A_42_P719478	NM_001191779	1571.58	281.427	2.425834e+001	4.128516e+000	82	30	7.923695e+000	0	0	0	0	0	0	22.7613	1	1	57.5363	31.4194
DATA	1151	14	46	0	0	A_42_P462257	NM_001109481	1597.09	280.672	1.327642e+004	1.327646e+003	12014	38.5	9.159883e+000	0	0	0	0	0	0	12400.5	1	1	45.1352	37.4
DATA	1152	14	47	0	0	A_44_P105634	NM_001007658	1622.5	281.352	1.750654e+002	1.782811e+001	223	32	1.011646e+001	0	0	0	0	0	0	162.79	1	1	57.5363	34.0303
DATA	1153	14	48	0	0	A_64_P100594	NM_001000360	1647.91	281.386	7.269664e+001	8.019797e+000	131	34	6.882229e+000	0	0	0	0	0	0	67.2846	1	1	57.259	34.4286
DATA	1154	14	49	0	0	A_64_P004266	A_64_P004266	1673.61	281.181	2.603596e+001	4.284864e+000	85	34	7.734829e+000	0	0	0	0	0	0	23.9806	1	1	47.8731	33.5517
DATA	1155	14	50	0	0	A_44_P156343	NM_001000102	1698.58	281.427	1.187072e+001	3.619559e+000	72	34	7.146520e+000	0	0	0	0	0	0	10.8817	1	0	57.5363	34.5357
DATA	1156	14	51	0	0	A_42_P504358	NM_001108674	1724.14	281.407	3.030849e+002	3.050269e+001	331	39	6.864042e+000	0	0	0	0	0	0	276.447	1	1	65	38.6786
DATA	1157	14	52	0	0	A_44_P281468	NM_001127556	1749.91	281.262	2.296735e+001	4.148121e+000	81.5	36.5	8.489744e+000	0	0	0	0	0	0	20.8412	1	1	45.835	36.5
DATA	1158	14	53	0	0	A_43_P12785	NM_053364	1774.89	281.5	3.483031e+000	3.473286e+000	61	31	6.856828e+000	0	0	0	0	0	0	0.986359	0	0	56.9804	30.4667
DATA	1159	14	54	0	0	A_64_P053297	NM_001107278	1800.03	280.723	3.544570e+003	3.544742e+002	3238.5	29	7.483515e+000	0	0	0	0	0	0	3183.6	1	1	45.4864	29.6757
DATA	1160	14	55	0	0	A_64_P062986	NM_001001018	1825.42	280.884	1.697552e+001	3.897236e+000	75.5	34	7.086412e+000	0	0	0	0	0	0	15.1676	1	0	47.2035	33.7
DATA	1161	14	56	0	0	A_44_P529226	NM_023091	1851.05	281.477	5.541375e+000	3.569715e+000	66	28.5	7.834518e+000	0	0	0	0	0	0	4.92547	1	0	65	29.8824
DATA	1162	14	57	0	0	A_42_P559737	NM_020074	1876.32	281.192	2.371112e+003	2.371377e+002	2089	32	8.663978e+000	0	0	0	0	0	0	2096.38	1	1	48.2044	32.7419
DATA	1163	14	58	0	0	A_44_P1017458	NM_199402	1901.67	281.5	1.373383e+002	1.418872e+001	180	31.5	7.471564e+000	0	0	0	0	0	0	120.789	1	1	57.5363	31.2083
DATA	1164	14	59	0	0	A_44_P407750	NM_001127680	1926.75	281.356	1.497469e+003	1.497898e+002	1324.5	32	5.963689e+000	0	0	0	0	0	0	1310.07	1	1	48.5334	30.9677
DATA	1165	14	60	0	0	A_64_P033872	NM_001037353	1952.51	281.689	3.557231e+001	5.062458e+000	91	32	6.065746e+000	0	0	0	0	0	0	30.9551	1	1	49.1849	31.8286
DATA	1166	14	61	0	0	A_42_P472699	NM_001108061	1978	281.455	6.370594e+001	7.327981e+000	117	33.5	5.680780e+000	0	0	0	0	0	0	55.1398	1	1	65	32.9333
DATA	1167	14	62	0	0	A_44_P201215	ENSRNOT00000014231	2003.5	281.5	1.916224e+001	4.114180e+000	77	34	8.812381e+000	0	0	0	0	0	0	16.498	1	1	65	33.4839
DATA	1168	14	63	0	0	A_64_P129910	NM_001107648	2028.6	280.91	9.138932e+002	9.146258e+001	844	34.5	6.773777e+000	0	0	0	0	0	0	782.662	1	1	46.1809	34.3333
DATA	1169	14	64	0	0	A_64_P027927	NM_022255	2054.33	281.5	1.026548e+002	1.090481e+001	147.5	32	7.478125e+000	0	0	0	0	0	0	87.4623	1	1	57.5363	31.8788
DATA	1170	14	65	0	0	A_64_P101623	A_64_P101623	2079.46	281.386	3.122839e+004	3.122841e+003	26805	30	5.680962e+000	0	0	0	0	0	0	26471.1	1	1	47.5395	31.24
DATA	1171	14	66	0	0	A_42_P645110	NM_001029919	2105	281.455	3.212123e+004	3.212125e+003	26431.5	33	7.785364e+000	0	0	0	0	0	0	27089.8	1	1	55.8519	33.9688
DATA	1172	14	67	0	0	A_64_P017781	NM_001010956	2129.94	281.464	2.041846e+002	2.075725e+001	232	33.5	8.162633e+000	0	0	0	0	0	0	171.36	1	1	47.5395	32.6667
DATA	1173	14	68	0	0	A_64_P057106	NM_001004087	2155.68	281.395	1.571675e+002	1.615875e+001	188	32	5.816550e+000	0	0	0	0	0	0	131.246	1	1	49.5074	31.0323
DATA	1174	14	69	0	0	A_44_P187005	NM_022238	2180.9	281.09	8.645508e+001	9.432417e+000	132	29	6.722773e+000	0	0	0	0	0	0	71.849	1	1	46.8651	29.5897
DATA	1175	14	70	0	0	A_42_P779933	NM_017117	2206.5	281.288	3.009172e+001	4.838814e+000	81	29	5.578799e+000	0	0	0	0	0	0	24.8915	1	1	46.5243	29.2941
DATA	1176	14	71	0	0	A_42_P555701	NM_001107554	2231.94	281.232	9.391543e+003	9.391620e+002	7625.5	28.5	7.555173e+000	0	0	0	1	0	0	7733.24	1	1	46.5243	30.375
DATA	1177	14	72	0	0	A_42_P705302	NM_001107361	2257.03	281.127	6.771435e+003	6.771542e+002	5530.5	30	1.056214e+001	0	0	0	1	0	0	5551.49	1	1	46.8651	30.3889
DATA	1178	14	73	0	0	A_64_P015435	A_64_P015435	2282.39	281.358	3.048764e+004	3.048766e+003	25391.5	33	7.895868e+000	0	0	0	0	0	0	24890.7	1	1	45.835	34.963
DATA	1179	14	74	0	0	A_64_P036217	NM_001000569	2308.13	281.703	6.372171e+001	7.447457e+000	113	29.5	5.521842e+000	0	0	0	0	0	0	51.8136	1	1	45.4864	29.75
DATA	1180	14	75	0	0	A_44_P543511	NM_001024749	2333.36	281.742	1.958698e+003	1.959081e+002	1712.5	29	7.447595e+000	0	0	0	0	0	0	1586.54	1	1	46.1809	30
DATA	1181	14	76	0	0	A_42_P759043	NM_001134509	2358.89	281.5	5.836358e+002	5.849270e+001	522	28	5.376828e+000	0	0	0	0	0	0	470.963	1	1	56.9804	27.8438
DATA	1182	14	77	0	0	A_42_P679982	NM_001107835	2384.27	281.408	3.977549e+003	3.977740e+002	3195	30	7.004749e+000	0	0	0	0	0	0	3198.44	1	1	47.8731	30.069
DATA	1183	14	78	0	0	A_43_P18064	NM_001106904	2409.58	281.573	2.014012e+001	4.398728e+000	75	31	9.521605e+000	0	0	0	0	0	0	16.1432	1	1	57.5363	31.2593
DATA	1184	14	79	0	0	A_64_P092143	NM_001129879	2434.94	281.462	3.192401e+003	3.192642e+002	2552	32.5	1.047530e+001	0	0	0	0	0	0	2551.04	1	1	44.7812	33.4167
DATA	1185	14	80	0	0	A_64_P102886	A_64_P102886	2460.54	281.87	1.634000e+001	4.259080e+000	70.5	25	6.421119e+000	0	0	0	0	0	0	13.022	1	0	37.847	26.3333
DATA	1186	14	81	66	1	DarkCorner	DarkCorner	2485.89	281.5	3.956465e+000	3.943444e+000	55.5	30	8.252869e+000	0	0	0	0	0	0	-2.19749	0	0	56.9804	28.8788
DATA	1187	14	82	66	1	DarkCorner	DarkCorner	2511.54	281.762	3.965195e+000	3.952145e+000	53	30	6.704381e+000	0	0	0	0	0	0	-2.05364	0	0	43.7019	29.7778
DATA	1188	14	83	66	1	DarkCorner	DarkCorner	2536.76	281.903	3.972775e+000	3.959700e+000	56	29.5	5.803096e+000	0	0	0	0	0	0	-0.320994	0	0	47.8731	28.75
DATA	1189	14	84	66	1	DarkCorner	DarkCorner	2562.11	281.5	3.979754e+000	3.966832e+000	58	28	6.777244e+000	0	0	0	0	0	0	0.294997	0	0	56.9804	29
DATA	1190	14	85	66	1	DarkCorner	DarkCorner	2587.5	281.648	6.337596e+000	4.022078e+000	61	26	7.148693e+000	0	0	0	0	0	0	5.0015	1	0	57.5363	26.9164
DATA	1191	15	1	66	1	DarkCorner	DarkCorner	441.519	287.691	8.116826e+000	3.633039e+000	71	26	7.042641e+000	0	0	0	0	0	0	7.18459	1	0	51.4001	26.4392
DATA	1192	15	2	66	1	DarkCorner	DarkCorner	467.243	287.757	3.520963e+000	3.509375e+000	62	31	7.844743e+000	0	0	0	0	0	0	-0.361748	0	0	48.8603	31.04
DATA	1193	15	3	66	1	DarkCorner	DarkCorner	492.486	288.069	3.491255e+000	3.479765e+000	60	31	6.811416e+000	0	0	0	0	0	0	-2.13586	0	0	48.5334	30.3462
DATA	1194	15	4	66	1	DarkCorner	DarkCorner	518.108	287.77	3.463108e+000	3.451710e+000	59	31.5	8.194168e+000	0	0	0	0	0	0	-4.78913	0	0	47.5395	31.6471
DATA	1195	15	5	66	1	DarkCorner	DarkCorner	543.5	288	3.436625e+000	3.437203e+000	66	28	6.317964e+000	0	0	0	0	0	0	2.61379	0	0	54.1152	29.6667
DATA	1196	15	6	0	0	A_44_P451392	NM_001108023	568.5	288	3.120911e+002	3.139387e+001	351.5	29.5	7.500268e+000	0	0	0	0	0	0	287.636	1	1	54.1152	29.5667
DATA	1197	15	7	0	0	A_64_P012661	ENSRNOT00000010298	594.06	287.687	1.139322e+003	1.139823e+002	1090.5	29	7.097227e+000	0	0	0	0	0	0	1057.26	1	1	45.835	30.5278
DATA	1198	15	8	0	0	A_42_P546058	NM_053670	619.298	287.791	3.180933e+003	3.181110e+002	3033	31	1.054361e+001	0	0	0	0	0	0	2970.8	1	1	45.835	32.9333
DATA	1199	15	9	0	0	A_42_P695401	NM_031530	644.625	288	1.112538e+002	1.161476e+001	166	34	9.481867e+000	0	0	0	1	0	0	104.535	1	1	48.5334	34.5833
DATA	1200	15	10	0	0	A_44_P192193	A_44_P192193	670.3	288.1	1.535248e+002	1.570670e+001	203	33	1.014401e+001	0	0	0	0	0	0	145.081	1	1	47.2035	34.6486
DATA	1201	15	11	0	0	A_42_P473886	NM_001165922	695.714	288.222	3.394917e+002	3.410913e+001	383	32	6.657342e+000	0	0	0	0	0	0	322.517	1	1	45.1352	31.9655
DATA	1202	15	12	0	0	A_42_P576953	NM_138882	721.031	288.215	5.150840e+002	5.161295e+001	550.5	32	4.492158e+000	0	0	0	0	0	0	491.715	1	1	45.835	31.1111
DATA	1203	15	13	0	0	A_44_P260227	ENSRNOT00000036745	746.5	288	6.308957e+001	7.105464e+000	126	30.5	7.873285e+000	0	0	0	0	0	0	60.4984	1	1	54.1152	29.1053
DATA	1204	15	14	0	0	A_44_P276435	NM_053853	771.5	288	2.291861e+002	2.314866e+001	284	30	6.764870e+000	0	0	0	0	0	0	220.669	1	1	54.1152	30.325
DATA	1205	15	15	0	0	A_43_P19066	NM_001017494	797.206	287.956	1.721853e+002	1.752128e+001	233	27.5	6.478010e+000	0	0	0	0	0	0	166.419	1	1	46.5243	27.7308
DATA	1206	15	16	0	0	A_64_P113200	ENSRNOT00000061930	822.529	287.956	4.022752e+001	5.160341e+000	102.5	31	8.985806e+000	0	0	0	0	0	0	39.0124	1	1	46.8651	30.8214
DATA	1207	15	17	0	0	A_42_P480108	NM_001007637	848	288	1.351231e+003	1.351615e+002	1346	31	8.613568e+000	0	0	0	0	0	0	1314.43	1	1	54.9904	31
DATA	1209	15	19	0	0	A_44_P420046	NM_021669	898.5	288.265	8.918657e+001	9.477392e+000	146	30	6.681317e+000	0	0	0	0	0	0	87.1969	1	1	46.5243	31.84
DATA	1210	15	20	0	0	A_64_P077021	A_64_P077021	924.5	288	3.214583e+001	4.535453e+000	93.5	32	7.239772e+000	0	0	0	0	0	0	31.4927	1	1	54.1152	32.5128
DATA	1211	15	21	0	0	A_44_P292558	NM_213559	949.232	288.101	2.860042e+002	2.877824e+001	335	31	1.199944e+001	0	0	0	0	0	0	280.655	1	1	46.5243	34.1143
DATA	1212	15	22	0	0	A_42_P471653	NM_001031654	975	288	2.750273e+001	4.211806e+000	88	27.5	8.002564e+000	0	0	0	0	0	0	27.0252	1	1	54.9904	29.4
DATA	1213	15	23	0	0	A_43_P12000	NM_019272	1000	288	6.844442e+002	6.851856e+001	714	31.5	8.188794e+000	0	0	0	0	0	0	673.246	1	1	46.8651	33.0278
DATA	1214	15	24	0	0	A_64_P131395	NM_001037523	1025.7	288.101	1.431200e+001	3.491115e+000	76.5	32	8.208340e+000	0	0	0	0	0	0	14.0883	1	0	45.835	32.6552
DATA	1215	15	25	0	0	A_42_P682853	NM_017193	1050.85	288.215	6.227951e+002	6.236079e+001	658.5	31	6.428654e+000	0	0	0	0	0	0	613.318	1	1	45.835	30.4483
DATA	1216	15	26	0	0	A_42_P647505	TC640289	1076.28	288.118	3.593932e+003	3.594073e+002	3483.5	31	6.986421e+000	0	0	0	0	0	0	3539.61	1	1	48.8603	31.8857
DATA	1217	15	27	0	0	A_44_P682959	NM_001025139	1101.91	288.065	1.078190e+001	3.360832e+000	73	31	8.055190e+000	0	0	0	0	0	0	10.6169	1	0	54.4085	32.7813
DATA	1218	15	28	0	0	A_64_P249426	NM_001014271	1127.5	288	2.727830e+001	4.193271e+000	85.5	33.5	1.047671e+001	0	0	0	0	0	0	26.848	1	1	65	33.8077
DATA	1219	15	29	0	0	A_64_P133430	NM_001044282	1152.5	287.682	2.747565e+004	2.747566e+003	26253	35	6.246038e+000	0	0	0	0	0	0	27021.4	1	1	46.5243	35.1818
DATA	1220	15	30	0	0	A_42_P635611	NM_001025685	1178.42	288.427	1.948383e+001	3.738178e+000	76.5	30	7.615773e+000	0	0	0	0	0	0	19.1432	1	1	57.5363	32
DATA	1221	15	31	0	0	A_42_P592013	NM_001127600	1203.06	287.825	2.386401e+003	2.386615e+002	2328	30	7.503277e+000	0	0	0	0	0	0	2341.59	1	1	45.4864	32.3714
DATA	1222	15	32	0	1	ETG02_36680	ETG02_36680	1228.91	288.386	6.854053e+000	3.271897e+000	69	35	6.957392e+000	0	0	0	0	0	0	6.7152	1	0	57.259	35.0303
DATA	1223	15	33	0	0	A_42_P608478	NM_001025131	1254.42	288.427	2.001656e+001	3.778774e+000	82.5	36	3.012751e+000	0	0	0	0	0	0	19.5757	1	1	65	35.92
DATA	1224	15	34	0	0	A_44_P137397	NM_017236	1279.58	288.427	8.908285e+004	8.908285e+003	87465	36	1.075236e+001	0	0	0	0	0	0	86944.8	1	1	57.5363	34.5517
DATA	1226	15	36	0	0	A_64_P110789	A_64_P110789	1330.5	288.352	9.906042e+000	3.375661e+000	69	31	9.011487e+000	0	0	0	0	0	0	9.62194	1	0	65	33.2759
DATA	1227	15	37	0	0	A_64_P061562	A_64_P061562	1355.35	288.222	1.004047e+003	1.004568e+002	979	34	9.325530e+000	0	0	0	0	0	0	972.639	1	1	47.5395	33.4138
DATA	1228	15	38	0	0	A_44_P511359	NM_001108736	1381.13	287.857	4.812436e+002	4.823367e+001	521	30.5	7.894210e+000	0	0	0	0	0	0	464.781	1	1	45.4864	30.4375
DATA	1229	15	39	0	0	A_42_P658220	NM_001109598	1406.2	288.082	2.376813e+003	2.377036e+002	2282.5	33	6.629822e+000	0	0	0	0	0	0	2288.46	1	1	44.7812	33.7273
DATA	1230	15	40	0	0	A_42_P479096	NM_001008293	1431.77	288.091	1.333112e+003	1.333512e+002	1323	33	6.437491e+000	0	0	0	0	0	0	1279.25	1	1	45.835	33.0769
DATA	1231	15	41	0	0	A_64_P275280	NM_001109569	1457.31	288.338	7.898743e+003	7.898811e+002	7217	34	8.118140e+000	0	0	0	0	0	0	7553.06	1	1	48.5334	34.0857
DATA	1232	15	42	0	0	A_42_P785926	NM_001108289	1482.67	288.5	1.129944e+003	1.130423e+002	1076	31	7.136609e+000	0	0	0	0	0	0	1076.53	1	1	57.5363	31.7419
DATA	1233	15	43	0	0	A_64_P005238	A_64_P005238	1508.42	288.427	4.218362e+001	5.357642e+000	102.5	30	7.666581e+000	0	0	0	0	0	0	40.0316	1	1	57.5363	31.4
DATA	1234	15	44	0	0	A_42_P555753	NM_001106401	1533.18	288.361	4.263493e+003	4.263622e+002	3953	27	6.405349e+000	0	0	0	0	0	0	4030.07	1	1	47.8731	28.4815
DATA	1235	15	45	0	0	A_42_P469751	XM_001054007	1558.46	288.174	2.185919e+003	2.186173e+002	2045.5	26	5.008499e+000	0	0	0	0	0	0	2057.6	1	1	47.2035	27.1333
DATA	1236	15	46	0	0	A_44_P506124	XM_222590	1584.07	287.883	4.480785e+003	4.480910e+002	4307.5	37.5	1.124326e+001	0	0	0	0	0	0	4199.22	1	1	44.4243	35.7941
DATA	1237	15	47	0	0	A_44_P441947	XM_001079870	1609.45	288.167	1.159528e+003	1.160015e+002	1166	34	9.271929e+000	0	0	0	0	0	0	1081.87	1	1	45.835	34.2593
DATA	1238	15	48	0	0	A_64_P127659	NM_001106228	1635.41	288.169	4.820927e+003	4.821046e+002	4349	37	1.725856e+001	0	0	0	0	0	0	4477.03	1	1	47.5395	42.4839
DATA	1239	15	49	0	0	A_42_P733076	NM_001033867	1660.5	288.5	2.897916e+002	2.917687e+001	328	34	7.178966e+000	0	0	0	0	0	0	267.886	1	1	57.5363	34.913
DATA	1240	15	50	0	0	A_64_P145939	NM_001109499	1686.06	288.577	5.834507e+001	6.756514e+000	114	35	8.592570e+000	0	0	0	0	0	0	53.6752	1	1	48.2044	34.0323
DATA	1241	15	51	0	0	A_44_P1040796	NM_001106660	1711.5	288.5	1.313014e+004	1.313019e+003	11619	38	7.158911e+000	0	0	0	0	0	0	12019.9	1	1	57.5363	36.8
DATA	1242	15	52	0	0	A_42_P588072	NM_001106829	1736.67	288.5	4.475491e+001	5.645387e+000	100	35.5	8.761749e+000	0	0	0	0	0	0	40.7685	1	1	57.5363	36.4444
DATA	1243	15	53	0	0	A_64_P045823	ENSRNOT00000023172	1762.33	288.5	1.819682e+002	1.852259e+001	231	34	8.711580e+000	0	0	0	0	0	0	164.914	1	1	57.5363	34.9655
DATA	1244	15	54	0	0	A_42_P591344	NM_001037780	1787.5	288.5	3.102697e+002	3.122110e+001	337	31	8.245168e+000	0	0	0	0	0	0	279.765	1	1	57.5363	31.129
DATA	1245	15	55	0	0	A_64_P120322	A_64_P120322	1812.89	288.5	1.353324e+001	3.747245e+000	73	33	8.544443e+000	0	0	0	0	0	0	12.1396	1	0	56.9804	32.7838
DATA	1246	15	56	0	0	A_64_P062665	NM_001170470	1837.93	288.493	6.110273e+002	6.120360e+001	589	31	7.717790e+000	0	0	0	0	0	0	545.285	1	1	47.8731	31.9167
DATA	1247	15	57	0	0	A_44_P398300	NM_001005538	1863.64	288.554	2.554679e+003	2.554923e+002	2186.5	29	9.068180e+000	0	0	0	0	0	0	2267.72	1	1	48.8603	30.3333
DATA	1248	15	58	0	0	A_64_P001545	ENSRNOT00000029141	1889.33	288.5	4.792413e+004	4.792415e+003	41079	32	8.539224e+000	0	0	0	0	0	0	42313.5	1	1	57.5363	33.2813
DATA	1249	15	59	0	0	A_44_P1010653	NM_001109021	1914.14	288.722	5.609425e+003	5.609539e+002	4832.5	31	5.806044e+000	0	0	0	0	0	0	4927.34	1	1	47.8731	29.3333
DATA	1250	15	60	0	0	A_44_P398969	NM_001013225	1939.4	289.059	7.706255e+002	7.714599e+001	744	31	6.018453e+000	0	0	0	0	0	0	673.402	1	1	46.5243	30.6875
DATA	1251	15	61	0	0	A_64_P059495	NM_001109986	1965.33	288.557	3.902544e+003	3.902711e+002	3322	32	5.315189e+000	0	0	0	0	0	0	3391.47	1	1	47.5395	32.4138
DATA	1252	15	62	0	0	A_64_P037040	A_64_P037040	1990.5	288.6	3.025380e+002	3.047028e+001	324	34	1.122903e+001	0	0	0	0	0	0	261.548	1	1	47.8731	34.6552
DATA	1253	15	63	0	0	A_64_P051446	NM_001142942	2016.13	288.634	8.382049e+003	8.382128e+002	6922	32	1.503264e+001	0	0	0	0	0	0	7208.18	1	1	47.5395	33.1379
DATA	1254	15	64	0	0	A_42_P701756	NM_001107646	2041.48	288.594	2.328625e+003	2.328913e+002	1972	34	7.760745e+000	0	0	0	0	0	0	1992.12	1	1	47.2035	34.3333
DATA	1255	15	65	0	0	A_44_P172604	NM_031795	2066.89	288.5	2.672769e+003	2.673022e+002	2271.5	34	1.175219e+001	0	0	0	0	0	0	2274.73	1	1	56.9804	34.963
DATA	1256	15	66	0	0	A_64_P152000	A_64_P152000	2092.42	288.573	1.028523e+001	3.842027e+000	68.5	32	5.010580e+000	0	0	0	0	0	0	8.709	1	0	57.5363	31.0345
DATA	1257	15	67	0	0	A_44_P339008	NM_001024975	2117.02	289.064	1.301339e+003	1.301870e+002	1165	35	1.158541e+001	0	0	0	0	0	0	1096.69	1	1	45.4864	36.3103
DATA	1258	15	68	0	0	A_44_P560070	A_44_P560070	2143.11	288.5	1.355377e+001	3.976829e+000	69	32.5	9.026137e+000	0	0	0	0	0	0	11.3632	1	0	56.9804	32.625
DATA	1259	15	69	0	0	A_44_P520509	NM_001033868	2168.5	288.5	6.403704e+003	6.403814e+002	5130	30	5.218024e+000	0	0	0	0	0	0	5342.93	1	1	49.1849	29.5278
DATA	1260	15	70	0	0	A_42_P643349	NM_001109495	2193.58	288.573	6.459899e+001	7.481667e+000	111.5	29	6.117286e+000	0	0	0	0	0	0	53.6489	1	1	57.5363	28.7241
DATA	1261	15	71	0	0	A_44_P215075	NM_012667	2219.42	288.573	1.429256e+002	1.478702e+001	177	29	5.534670e+000	0	0	0	0	0	0	118.146	1	1	57.5363	29.4848
DATA	1262	15	72	0	0	A_44_P560363	ENSRNOT00000049736	2244.57	289.032	1.923246e+003	1.923623e+002	1656	32	9.493631e+000	0	0	0	0	0	0	1582.98	1	1	44.0646	32.25
DATA	1263	15	73	0	0	A_44_P553158	NM_001014014	2270	288.545	1.628253e+003	1.628702e+002	1391	29.5	9.819993e+000	0	0	0	0	0	0	1334.27	1	1	55.8519	30.1471
DATA	1264	15	74	0	0	A_64_P165277	NM_001106370	2295.5	288.648	2.876741e+001	4.798802e+000	79.5	34	8.150071e+000	0	0	0	0	0	0	23.4763	1	1	57.5363	33.9032
DATA	1265	15	75	0	0	A_64_P138187	A_64_P138187	2320.58	288.573	9.700391e+002	9.708053e+001	856	28	5.672697e+000	0	0	0	0	0	0	788.515	1	1	57.5363	28.7778
DATA	1266	15	76	0	0	A_44_P429041	XM_227654	2346.13	289.143	3.114860e+002	3.138811e+001	305.5	29	5.017948e+000	0	0	0	0	0	0	252.271	1	1	45.4864	29.4138
DATA	1267	15	77	0	0	A_44_P465880	NM_199389	2371.5	288.735	3.241015e+003	3.241248e+002	2651.5	29.5	7.531587e+000	0	0	0	0	0	0	2615.27	1	1	46.5243	28.7188
DATA	1268	15	78	0	0	A_44_P381740	NM_001000239	2397.09	288.935	1.158990e+001	4.066140e+000	69	31	6.237788e+000	0	0	0	0	0	0	9.32103	1	0	54.4085	30.08
DATA	1269	15	79	0	0	A_64_P045211	NM_001191733	2422.52	288.667	2.815376e+001	4.818116e+000	83	33	9.023118e+000	0	0	0	0	0	0	22.5699	1	1	46.8651	33.2
DATA	1270	15	80	0	0	A_64_P010896	A_64_P010896	2447.54	288.873	1.759588e+001	4.297673e+000	73.5	29	8.161415e+000	0	0	0	0	0	0	14.0665	1	0	47.8731	29.5
DATA	1271	15	81	0	0	A_42_P566906	NM_001006966	2473.39	288.931	3.804997e+003	3.805200e+002	3044.5	27	7.448750e+000	0	0	0	0	0	0	3033.66	1	1	53.8203	27.25
DATA	1272	15	82	66	1	DarkCorner	DarkCorner	2498.75	289.114	3.953629e+000	3.940616e+000	53	31	8.913948e+000	0	0	0	0	0	0	-4.26949	0	0	49.1849	29.5385
DATA	1273	15	83	66	1	DarkCorner	DarkCorner	2524	289	3.961987e+000	3.948948e+000	54.5	30	7.186962e+000	0	0	0	0	0	0	-3.40532	0	0	54.9904	28.963
DATA	1274	15	84	66	1	DarkCorner	DarkCorner	2549.5	289	3.969161e+000	3.958782e+000	58	26	5.821001e+000	0	0	0	0	0	0	1.1549	0	0	54.1152	26.3333
DATA	1275	15	85	66	1	DarkCorner	DarkCorner	2574.73	289.343	3.974715e+000	3.967561e+000	58	27	6.989675e+000	0	0	0	0	0	0	1.71535	0	0	46.8651	27.6889
DATA	1276	16	1	66	1	DarkCorner	DarkCorner	454.346	294.872	4.218894e+000	3.546724e+000	65	26	6.345352e+000	0	0	0	0	0	0	3.75519	1	0	49.1849	27.2778
DATA	1277	16	2	66	1	DarkCorner	DarkCorner	479.62	295.266	3.502649e+000	3.491121e+000	61.5	30	9.174016e+000	0	0	0	0	0	0	-0.994672	0	0	50.7771	29.6552
DATA	1278	16	3	66	1	DarkCorner	DarkCorner	505.452	295.137	3.473466e+000	3.462113e+000	62	30	8.472695e+000	0	0	0	0	0	0	0.210631	0	0	48.2044	31.0857
DATA	1279	16	4	66	1	DarkCorner	DarkCorner	530.582	295.427	3.446537e+000	3.435194e+000	56	30	8.360486e+000	0	0	0	0	0	0	-4.87971	0	0	57.5363	30.9091
DATA	1280	16	5	0	0	A_42_P708614	NM_001130505	556	295.455	4.655912e+004	4.655913e+003	42655	32	4.879208e+000	0	0	0	0	0	0	42800.3	1	1	55.8519	31.84
DATA	1281	16	6	0	0	A_44_P427177	NM_053923	581.149	294.791	7.285146e+000	3.463910e+000	68.5	29	8.065389e+000	0	0	0	0	0	0	6.74314	1	0	46.1809	28.7632
DATA	1282	16	7	0	0	A_44_P417051	NM_001024886	606.582	295.427	6.236908e+001	7.086200e+000	120.5	29	7.679046e+000	0	0	0	0	0	0	58.1172	1	1	57.5363	29.5
DATA	1283	16	8	0	0	A_64_P052917	ENSRNOT00000029053	632.418	295.427	3.725990e+001	5.005597e+000	98	30	8.833082e+000	0	0	0	0	0	0	34.94	1	1	57.5363	32.76
DATA	1284	16	9	0	0	A_42_P689013	NM_053800	657.375	295.042	1.763799e+004	1.763802e+003	16382	34	8.897630e+000	0	0	0	0	0	0	16634	1	1	48.2044	33.9333
DATA	1285	16	10	0	0	A_42_P668072	NM_013130	683	295.455	1.834798e+002	1.864332e+001	235	31	5.725236e+000	0	0	0	0	0	0	173.996	1	1	55.8519	30.7241
DATA	1286	16	11	0	0	A_44_P762596	XM_237156	708.691	294.971	2.542295e+002	2.563478e+001	305	30.5	5.442850e+000	0	0	0	0	0	0	242.311	1	1	46.1809	30.7692
DATA	1287	16	12	0	0	A_44_P673662	TC577636	733.671	295.329	7.475792e+001	8.161060e+000	134	31	5.214842e+000	0	0	0	0	0	0	71.5845	1	1	48.2044	29.8621
DATA	1288	16	13	0	0	A_42_P674598	NM_013067	759.333	295.5	4.064342e+004	4.064343e+003	38269	32	8.146740e+000	0	0	0	0	0	0	39088.4	1	1	57.5363	30.7297
DATA	1289	16	14	0	0	A_44_P529994	NM_001191720	784.736	295.75	1.560849e+001	3.602044e+000	81	30	6.405768e+000	0	0	0	0	0	0	15.0709	1	0	47.5395	30.7647
DATA	1290	16	15	0	0	A_42_P655644	NM_133618	809.643	294.871	1.372362e+003	1.372744e+002	1353	30	8.558544e+000	0	0	0	0	0	0	1329.63	1	1	46.8651	30.7143
DATA	1291	16	16	0	0	A_42_P589674	NM_001044225	835.079	294.778	6.348064e+003	6.348146e+002	6166	30	7.634744e+000	0	0	0	0	0	0	6170.19	1	1	45.4864	30.9688
DATA	1292	16	17	0	0	A_64_P010139	A_64_P010139	860.561	295.598	1.335831e+002	1.373982e+001	188.5	33	7.008088e+000	0	0	0	0	0	0	130.225	1	1	51.4001	32.5517
DATA	1293	16	18	0	0	A_42_P586883	NM_001106416	886.107	295.5	6.636377e+001	7.370730e+000	126.5	31	7.189340e+000	0	0	0	0	0	0	64.8592	1	1	56.9804	31.9259
DATA	1294	16	19	0	0	A_42_P461144	DV724416	911.311	295.662	1.668230e+003	1.668537e+002	1644	29	6.298362e+000	0	0	0	0	0	0	1633.97	1	1	48.5334	30.5897
DATA	1295	16	20	0	0	A_64_P130565	NM_031668	936.893	295.5	2.437744e+002	2.458583e+001	301	30	8.044671e+000	0	0	0	0	0	0	239.208	1	1	56.9804	31.8438
DATA	1296	16	21	0	0	A_64_P002826	NM_001134527	962.319	295.069	1.706974e+002	1.736519e+001	230.5	36	9.170892e+000	0	0	0	0	0	0	167.747	1	1	47.8731	33.9474
DATA	1298	16	23	0	0	A_64_P036099	A_64_P036099	1013.12	295.267	2.630195e+003	2.630388e+002	2660.5	34	8.399346e+000	0	0	0	0	0	0	2590.15	1	1	52.3208	32.7647
DATA	1299	16	24	0	0	A_64_P080580	ENSRNOT00000040473	1038.06	295.379	8.407751e+002	8.413767e+001	899.5	30.5	8.537731e+000	0	0	0	0	0	0	828.448	1	1	45.4864	31.3214
DATA	1300	16	25	0	0	A_43_P12276	NM_022636	1063.89	295.329	5.207068e+001	6.101452e+000	114	30	6.108444e+000	0	0	0	0	0	0	51.321	1	1	49.5074	29.7179
DATA	1301	16	26	0	0	A_42_P505393	NM_199085	1089.2	295.342	6.660280e+002	6.667869e+001	713	31	7.024926e+000	0	0	0	0	0	0	656.42	1	1	49.5074	31.6571
DATA	1302	16	27	0	0	A_44_P883619	ENSRNOT00000032374	1114.58	295.573	5.530070e+000	3.229013e+000	68	32.5	1.014629e+001	0	0	0	0	0	0	5.44869	1	0	57.5363	33.5333
DATA	1303	16	28	0	0	A_44_P493894	ENSRNOT00000050156	1140.05	295.523	1.648445e+005	1.648445e+004	162694	36	1.085570e+001	0	0	0	0	0	0	162320	1	1	55.8519	38.3846
DATA	1304	16	29	0	0	A_64_P085334	TC585414	1165.03	295.127	1.043800e+004	1.043805e+003	9930.5	36	1.441154e+001	0	0	0	0	0	0	10268.8	1	1	46.8651	39.8857
DATA	1306	16	31	0	0	A_64_P045433	A_64_P045433	1216.18	295.379	3.926252e+003	3.926382e+002	3817	32.5	7.681030e+000	0	0	0	0	0	0	3852.82	1	1	45.4864	34.1765
DATA	1307	16	32	0	0	A_64_P025351	AY724474	1241.58	295.573	3.935365e+004	3.935366e+003	38921	36	6.325065e+000	0	0	0	0	0	0	38554.3	1	1	57.5363	35.8387
DATA	1308	16	33	0	0	A_44_P501626	ENSRNOT00000050744	1267	295.545	2.494178e+001	4.061626e+000	86	33	7.609371e+000	0	0	0	0	0	0	24.3885	1	1	55.8519	31.7429
DATA	1309	16	34	0	0	A_64_P071525	NM_001000141	1292.42	295.573	3.223096e+000	3.217629e+000	64	33	9.185793e+000	0	0	0	0	0	0	1.77389	0	0	57.5363	33.5
DATA	1310	16	35	0	0	A_64_P006545	A_64_P006545	1317.24	295.5	1.869264e+004	1.869267e+003	18010	27.5	6.543229e+000	0	0	0	0	0	0	18196.3	1	1	46.5243	28.4231
DATA	1311	16	36	0	0	A_64_P089561	NM_001044265	1343.35	295.394	6.602953e+001	7.350044e+000	126	35	8.909921e+000	0	0	0	0	0	0	64.1039	1	1	47.8731	36.3793
DATA	1312	16	37	0	0	A_44_P791108	NM_001014070	1368.58	295.573	4.106818e+001	5.229550e+000	101	31.5	7.116541e+000	0	0	0	0	0	0	39.7599	1	1	57.5363	31.5
DATA	1313	16	38	0	0	A_44_P161535	A_44_P161535	1393.9	295.333	7.887243e+003	7.887309e+002	7999.5	32	7.243230e+000	0	0	0	0	0	0	7612.76	1	1	45.1352	31.8148
DATA	1314	16	39	0	0	A_44_P299136	NM_001108539	1419.07	295.338	3.074469e+002	3.091683e+001	351	32	8.284867e+000	0	0	0	0	0	0	295.802	1	1	45.835	33.7561
DATA	1315	16	40	1028	1	(+)E1A_r60_a97	E1A_r60_a97	1444.84	295.342	1.201462e+001	3.482973e+000	73	32	8.428222e+000	0	0	0	0	0	0	11.5196	1	0	48.2044	33.2222
DATA	1316	16	41	0	0	A_44_P161723	NM_001134526	1470.62	295.384	2.325675e+002	2.348706e+001	289	33.5	1.053867e+001	0	0	0	0	0	0	222.173	1	1	48.8603	34.9688
DATA	1317	16	42	0	0	A_64_P121443	A_64_P121443	1495.36	295.792	6.716927e+000	3.360835e+000	67	30.5	6.796311e+000	0	0	0	0	0	0	6.39355	1	0	47.5395	30.8529
DATA	1318	16	43	0	0	A_42_P771373	NM_012614	1520.56	295.603	1.539083e+004	1.539087e+003	13996.5	28	7.073312e+000	0	0	0	0	0	0	14592.4	1	1	50.1463	30.4286
DATA	1319	16	44	0	0	A_44_P1025944	NM_147140	1545.82	295.761	1.331561e+004	1.331565e+003	11927	28	6.039715e+000	0	0	0	0	0	0	12573.9	1	1	46.1809	29.0667
DATA	1320	16	45	0	0	A_64_P014085	NM_001007678	1571.67	295.75	1.174108e+003	1.174581e+002	1110	31	8.397388e+000	0	0	0	0	0	0	1103.94	1	1	47.5395	33.129
DATA	1321	16	46	0	0	A_64_P095298	NM_001047963	1597.05	295.523	7.434759e+001	8.153999e+000	130.5	36	9.499203e+000	0	0	0	0	0	0	69.5971	1	1	44.0646	34.2121
DATA	1322	16	47	0	0	A_64_P122037	A_64_P122037	1622	295.569	2.328204e+004	2.328206e+003	21625	38	1.054443e+001	0	0	0	0	0	0	21698.4	1	1	44.7812	39.5806
DATA	1323	16	48	0	0	A_64_P098094	A_64_P098094	1647.91	295.935	8.733772e+004	8.733772e+003	81940	34.5	1.438853e+001	0	0	0	0	0	0	81018.6	1	1	54.4085	39.0667
DATA	1324	16	49	0	0	A_44_P353708	ENSRNOT00000033510	1673.5	296	6.102565e+001	6.983401e+000	117.5	30.5	8.857492e+000	0	0	0	0	0	0	56.3415	1	1	54.1152	32.4
DATA	1325	16	50	0	0	A_42_P541669	ENSRNOT00000043345	1698.5	296	9.064197e+002	9.070614e+001	878.5	36	7.145395e+000	0	0	0	0	0	0	832.875	1	1	54.1152	34.16
DATA	1326	16	51	0	0	A_42_P560894	NM_019138	1723.75	295.841	4.855199e+003	4.855320e+002	4394	35	9.140259e+000	0	0	0	0	0	0	4439.37	1	1	46.1809	36.5172
DATA	1327	16	52	0	0	A_42_P498066	NM_031136	1749.5	296	8.102459e+004	8.102460e+003	73727	35.5	9.935071e+000	0	0	0	0	0	0	73712.3	1	1	54.1152	34.9375
DATA	1328	16	53	0	0	A_42_P538928	NM_053021	1774.55	295.917	2.147302e+004	2.147305e+003	19051	34	9.392305e+000	0	0	0	1	0	0	19437.4	1	1	49.8279	31.8462
DATA	1329	16	54	0	0	A_64_P302169	NM_001099493	1800.16	296.016	3.812730e+001	5.162559e+000	95	32.5	8.081598e+000	0	0	0	0	0	0	34.3352	1	1	45.4864	31.3421
DATA	1330	16	55	0	0	A_43_P18282	NM_001173436	1825.5	296	6.441126e+001	7.330025e+000	116	31	9.171465e+000	0	0	0	0	0	0	57.7055	1	1	54.1152	32.4828
DATA	1331	16	56	0	0	A_44_P304169	NM_001000482	1851.08	295.577	2.702513e+002	2.725308e+001	314	28	7.596791e+000	0	0	0	0	0	0	240.827	1	1	41.0736	29.4706
DATA	1332	16	57	0	0	A_44_P318932	XM_231081	1876.08	295.985	5.706455e+003	5.706564e+002	4988	33	7.894938e+000	0	0	0	0	0	0	5059.29	1	1	46.8651	33.4828
DATA	1333	16	58	0	0	A_64_P124621	A_64_P124621	1901.5	296	5.259995e+001	6.348186e+000	110	31	6.888628e+000	0	0	0	0	0	0	46.3893	1	1	54.1152	30.1034
DATA	1334	16	59	0	0	A_42_P553960	NM_001107831	1926.84	296.103	1.044138e+004	1.044144e+003	8788.5	31	6.248280e+000	0	0	0	0	0	0	9160.31	1	1	46.5243	30.3214
DATA	1335	16	60	0	0	A_64_P129459	A_64_P129459	1952.35	296.12	7.458859e+002	7.467502e+001	701.5	33	5.542013e+000	0	0	0	0	0	0	650.914	1	1	48.8603	31.7941
DATA	1336	16	61	0	0	A_64_P083224	ENSRNOT00000017383	1978.09	295.787	3.127248e+001	4.777138e+000	88	34	5.828466e+000	0	0	0	0	0	0	27.1436	1	1	47.5395	32.6667
DATA	1337	16	62	0	0	A_64_P031840	NM_001017445	2003.3	295.9	1.409934e+003	1.410401e+002	1252	31	1.287119e+001	0	0	0	0	0	0	1217.46	1	1	47.2035	32.1034
DATA	1338	16	63	0	0	A_43_P16427	NM_001191000	2028.02	295.353	5.770955e+001	6.827755e+000	108	33	1.159125e+001	0	0	0	0	0	0	49.5741	1	1	40.2912	32.9032
DATA	1339	16	64	0	0	A_64_P159034	NM_001191681	2054	296	2.562526e+004	2.562529e+003	21452	32	8.719922e+000	0	0	0	0	0	0	21899.8	1	1	46.8651	34.037
DATA	1340	16	65	0	0	A_64_P009007	A_64_P009007	2079.43	296.03	5.481445e+001	6.605771e+000	108	30	5.725072e+000	0	0	0	0	0	0	46.6072	1	1	45.835	31.4643
DATA	1341	16	66	0	0	A_42_P489817	NM_001107681	2104.9	296.191	5.410619e+003	5.410746e+002	4586	33	9.211219e+000	0	0	0	0	0	0	4577.51	1	1	46.5243	34.5714
DATA	1342	16	67	0	0	A_42_P643272	NM_053389	2129.91	296.104	2.278927e+003	2.279231e+002	1936.5	33.5	9.993649e+000	0	0	0	0	0	0	1918.62	1	1	46.8651	34.1111
DATA	1343	16	68	0	0	A_64_P076063	XM_001061753	2155.61	296.069	9.819318e+001	1.050798e+001	140	30.5	5.212415e+000	0	0	0	0	0	0	82.2629	1	1	53.8203	30.4211
DATA	1344	16	69	0	0	A_64_P047371	NM_001109423	2181.13	295.857	2.457041e+003	2.457329e+002	2129	27.5	5.267061e+000	0	0	0	0	0	0	2048.53	1	1	45.4864	27
DATA	1345	16	70	0	0	A_44_P991940	XM_225667	2206.5	296.352	1.196742e+002	1.254917e+001	158	30	6.515671e+000	0	0	0	0	0	0	99.3277	1	1	57.5363	30.0556
DATA	1346	16	71	0	0	A_42_P667802	ENSRNOT00000014585	2232.21	295.971	1.401252e+002	1.451710e+001	175	30	7.028891e+000	0	0	0	0	0	0	115.763	1	1	46.8651	29.9697
DATA	1347	16	72	0	0	A_44_P433942	A_44_P433942	2257.42	296.427	3.695632e+001	5.308023e+000	92	27	1.070321e+001	0	0	0	0	0	0	30.4026	1	1	57.5363	29.9394
DATA	1348	16	73	0	0	A_42_P735279	NM_001004446	2282.38	296	2.495819e+004	2.495822e+003	20006	30	9.879972e+000	0	0	0	0	0	0	20445.6	1	1	48.5334	31.4231
DATA	1349	16	74	0	0	A_64_P000316	A_64_P000316	2308.08	295.871	7.835349e+001	8.726648e+000	123	28	6.595104e+000	0	0	0	0	0	0	63.923	1	1	45.1352	29.5667
DATA	1350	16	75	0	0	A_64_P073357	XM_001070426	2333.35	295.933	8.434671e+001	9.274624e+000	128.5	28	4.576426e+000	0	0	0	0	0	0	68.5499	1	1	43.7019	29.2333
DATA	1351	16	76	0	0	A_42_P501972	NM_001025418	2358.64	296.364	3.957671e+002	3.976552e+001	374	29	5.759669e+000	0	0	0	1	0	0	320.508	1	1	49.5074	28.5926
DATA	1352	16	77	0	0	A_64_P030824	ENSRNOT00000002002	2384.3	296.1	1.725960e+002	1.769128e+001	199	30.5	7.239205e+000	0	0	0	0	0	0	139.279	1	1	47.2035	29.9643
DATA	1353	16	78	0	0	A_42_P537715	NM_001025743	2409.49	296.127	2.812341e+003	2.812611e+002	2315	31	7.899789e+000	0	0	0	0	0	0	2262.2	1	1	47.8731	30.36
DATA	1354	16	79	0	0	A_44_P596424	TC642059	2435.11	296.139	7.151013e+002	7.161687e+001	632	29	8.520967e+000	0	0	0	0	0	0	573.474	1	1	46.8651	32.5417
DATA	1355	16	80	0	0	A_42_P528891	XM_001074805	2460.26	296	3.728677e+002	3.749220e+001	352	28.5	7.075415e+000	0	0	0	0	0	0	298.194	1	1	45.4864	28.3824
DATA	1356	16	81	0	0	A_64_P130516	A_64_P130516	2485.89	296.5	9.197690e+001	1.000167e+001	129	31	7.297390e+000	0	0	0	0	0	0	73.3803	1	1	56.9804	30.4242
DATA	1357	16	82	66	1	DarkCorner	DarkCorner	2511.42	296.427	3.950732e+000	3.937729e+000	54.5	29	8.579433e+000	0	0	0	0	0	0	-4.22131	0	0	65	27.76
DATA	1358	16	83	66	1	DarkCorner	DarkCorner	2536.28	296.269	3.958414e+000	3.945386e+000	56	28	6.704734e+000	0	0	0	0	0	0	-0.854748	0	0	46.1809	27.8649
DATA	1359	16	84	66	1	DarkCorner	DarkCorner	2562.11	296.5	3.964810e+000	3.951761e+000	55	27	6.021390e+000	0	0	0	0	0	0	-2.68701	0	0	56.9804	26.9143
DATA	1360	16	85	66	1	DarkCorner	DarkCorner	2587.52	296.573	6.527429e+000	4.010421e+000	63	26	6.891402e+000	0	0	0	0	0	0	5.1707	1	0	49.5074	26.6799
DATA	1361	17	1	66	1	DarkCorner	DarkCorner	441.552	302.448	4.135504e+000	3.557795e+000	64	27	6.928871e+000	0	0	0	0	0	0	3.66833	1	0	52.9257	27.7112
DATA	1362	17	2	66	1	DarkCorner	DarkCorner	467.114	302.291	3.514021e+000	3.503561e+000	64	31	7.602294e+000	0	0	0	0	0	0	0.787407	0	0	49.8279	30.8889
DATA	1363	17	3	66	1	DarkCorner	DarkCorner	492.5	302.5	3.484468e+000	3.473000e+000	59	28	8.764706e+000	0	0	0	0	0	0	-2.74297	0	0	57.5363	29.8485
DATA	1364	17	4	66	1	DarkCorner	DarkCorner	517.893	302.5	3.456683e+000	3.445307e+000	58	28	7.808538e+000	0	0	0	0	0	0	-3.3762	0	0	56.9804	29.7647
DATA	1365	17	5	0	0	A_44_P434817	NM_001012187	543.239	302.183	4.432509e+003	4.432641e+002	4031.5	33	7.346194e+000	0	0	0	0	0	0	4063.16	1	1	47.2035	32.0789
DATA	1366	17	6	0	0	A_64_P153319	A_64_P153319	568.049	302.164	5.989236e+002	5.998854e+001	630	29	6.402452e+000	0	0	0	0	0	0	552.891	1	1	45.1352	27.5161
DATA	1367	17	7	0	0	A_64_P034394	XM_218828	594.107	302.5	2.437512e+001	4.160533e+000	85.5	30.5	7.846239e+000	0	0	0	0	0	0	22.66	1	1	65	30.025
DATA	1368	17	8	0	0	A_64_P001399	A_64_P001399	619.298	302.224	1.412584e+004	1.412588e+003	13136.5	31	7.680218e+000	0	0	0	0	0	0	13215.1	1	1	45.835	31.7037
DATA	1369	17	9	0	0	A_42_P712191	NM_001109207	644.468	302.494	2.333082e+002	2.356735e+001	281	32	8.072521e+000	0	0	0	0	0	0	219.575	1	1	50.4627	32.9677
DATA	1370	17	10	0	0	A_44_P746633	NM_001109580	670.2	302.643	1.739122e+004	1.739125e+003	16205	32.5	7.075166e+000	0	0	0	0	0	0	16461.2	1	1	47.5395	33.3333
DATA	1371	17	11	0	0	A_42_P772157	NM_017020	695.627	302.64	1.323555e+003	1.323965e+002	1304.5	30	4.268130e+000	0	0	0	0	0	0	1259.35	1	1	48.8603	30.0714
DATA	1372	17	12	0	0	A_44_P407543	NM_001024996	721.292	302.569	1.530836e+002	1.565543e+001	209	31	5.124052e+000	0	0	0	0	0	0	146.373	1	1	48.5334	30.4516
DATA	1374	17	14	0	0	A_64_P057225	NM_001008857	771.667	302.5	2.563717e+002	2.584240e+001	310	29.5	7.020420e+000	0	0	0	0	0	0	247.227	1	1	57.5363	29.4375
DATA	1375	17	15	0	0	A_42_P462015	NM_001011943	797.418	302.573	5.483013e+002	5.492566e+001	577	30	7.755532e+000	0	0	0	0	0	0	530.759	1	1	57.5363	30.3
DATA	1376	17	16	0	0	A_42_P596050	NM_053572	822.526	302.658	4.770301e+002	4.781205e+001	530	31.5	7.207066e+000	0	0	0	0	0	0	463.321	1	1	49.8279	31.6429
DATA	1377	17	17	0	0	A_44_P213776	NM_052829	848	302.545	1.237542e+002	1.278683e+001	183.5	31	7.879659e+000	0	0	0	0	0	0	120.563	1	1	55.8519	31.2439
DATA	1378	17	18	0	0	A_64_P004468	A_64_P004468	873.136	303.03	5.331184e+003	5.331281e+002	5258	34	7.908321e+000	0	0	0	0	0	0	5207.8	1	1	46.5243	34.6923
DATA	1379	17	19	0	0	A_44_P290394	NM_053580	898.574	303.162	3.492022e+003	3.492168e+002	3382	30	7.528435e+000	0	0	0	0	0	0	3419.28	1	1	46.8651	30.9655
DATA	1380	17	20	0	0	A_64_P076911	XM_215948	923.985	303.075	9.162426e+001	9.703429e+000	153.5	30	7.951778e+000	0	0	0	0	0	0	89.8958	1	1	46.8651	32.0769
DATA	1381	17	21	0	0	A_64_P155895	NM_001009658	949.031	302.785	2.850313e+003	2.850491e+002	2829	36	7.238627e+000	0	0	0	0	0	0	2801.11	1	1	45.835	34.0909
DATA	1382	17	22	0	0	A_43_P16338	ENSRNOT00000034555	974.983	302.783	9.124451e+001	9.664398e+000	153	32.5	9.821808e+000	0	0	0	0	0	0	89.7942	1	1	44.4243	33.6765
DATA	1383	17	23	0	0	A_42_P716283	NM_001107983	1000.24	302.701	1.211109e+003	1.211527e+002	1236	31	8.913699e+000	0	0	0	0	0	0	1193.08	1	1	45.835	31.1667
DATA	1384	17	24	0	0	A_43_P13355	NM_139082	1025.58	302.573	2.033001e+002	2.057714e+001	258	31.5	7.886345e+000	0	0	0	0	0	0	200.417	1	1	57.5363	32.25
DATA	1385	17	25	0	0	A_64_P126065	NM_001005900	1050.74	302.778	1.199758e+002	1.241139e+001	175	29	5.858181e+000	0	0	0	0	0	0	118.327	1	1	47.5395	29.4194
DATA	1386	17	26	0	0	A_44_P838532	NM_001107144	1076.51	302.589	1.123812e+003	1.124261e+002	1152	30	5.687450e+000	0	0	0	0	0	0	1108.49	1	1	48.5334	29.6316
DATA	1387	17	27	0	0	A_42_P785861	NM_001009422	1101.69	302.662	4.368084e+003	4.368199e+002	4144.5	30	6.913443e+000	0	0	0	0	0	0	4307.83	1	1	48.5334	31.0645
DATA	1388	17	28	0	0	A_42_P641962	NM_012999	1127.42	302.573	2.833839e+003	2.834017e+002	2816	33.5	9.674035e+000	0	0	0	0	0	0	2793.44	1	1	57.5363	33.25
DATA	1389	17	29	0	0	A_64_P085201	TC633318	1152.5	303	1.665854e+002	1.695971e+001	229	35	1.188948e+001	0	0	0	0	0	0	164.1	1	1	54.1152	36.2143
DATA	1390	17	30	0	0	A_64_P015687	NM_053573	1177.79	302.806	5.075042e+003	5.075142e+002	4836	32	8.222707e+000	0	0	0	0	0	0	4994.24	1	1	47.5395	32.75
DATA	1391	17	31	0	0	A_64_P078332	NM_012794	1203.54	302.623	4.490157e+002	4.501470e+001	488.5	28.5	7.079041e+000	0	0	0	0	0	0	441.292	1	1	46.8651	30.3
DATA	1392	17	32	0	0	A_42_P637189	NM_031612	1228.67	302.75	5.988469e+003	5.988555e+002	5762.5	33	8.227241e+000	0	0	0	0	0	0	5876.68	1	1	47.5395	34
DATA	1393	17	33	0	0	A_42_P602472	NM_001008290	1254	302.797	3.385676e+003	3.385827e+002	3222	34.5	8.064008e+000	0	0	0	0	0	0	3316.63	1	1	46.8651	33.4375
DATA	1394	17	34	0	0	A_64_P003749	NM_031799	1279.63	302.873	8.725958e+001	9.296355e+000	147	31.5	8.667816e+000	0	0	0	0	0	0	85.3073	1	1	47.5395	31.2
DATA	1395	17	35	0	0	A_42_P785861	NM_001009422	1305	302.797	4.341824e+003	4.341943e+002	4138	27	8.127479e+000	0	0	0	0	0	0	4235.13	1	1	46.8651	29.5484
DATA	1396	17	36	0	0	A_64_P138889	NM_001013050	1330.27	302.803	4.658778e+003	4.658889e+002	4448	32	9.280356e+000	0	0	0	0	0	0	4533.12	1	1	45.835	34.0625
DATA	1397	17	37	0	0	A_44_P409820	NM_012908	1355.91	302.935	6.624460e+001	7.370005e+000	126.5	34	9.838438e+000	0	0	0	0	0	0	64.2839	1	1	54.4085	34.7778
DATA	1398	17	38	0	0	A_44_P529880	ENSRNOT00000033370	1381.41	302.951	5.716886e+000	3.289580e+000	68	35	7.554063e+000	0	0	0	0	0	0	5.53153	1	0	43.7019	34.3714
DATA	1399	17	39	0	0	A_64_P084851	ENSRNOT00000029593	1406.37	303	1.103616e+002	1.150458e+001	166.5	32	7.596992e+000	0	0	0	0	0	0	106.459	1	1	46.5243	32
DATA	1400	17	40	0	0	A_44_P654068	NM_001114402	1432	302.797	5.818544e+002	5.827671e+001	617	32	7.979095e+000	0	0	0	0	0	0	559.397	1	1	46.8651	32.9091
DATA	1401	17	41	0	0	A_64_P094855	NM_001109591	1457.24	303	2.320381e+003	2.320611e+002	2252	34	8.308048e+000	0	0	0	0	0	0	2223.17	1	1	46.8651	33.9032
DATA	1402	17	42	0	0	A_42_P516658	NM_001024888	1482.5	303	1.978255e+002	2.005319e+001	256	32.5	8.942863e+000	0	0	0	0	0	0	188.848	1	1	54.1152	32.6563
DATA	1403	17	43	0	0	A_64_P092394	ENSRNOT00000064749	1508.5	303	2.310231e+001	4.025344e+000	83	30.5	6.303081e+000	0	0	0	0	0	0	21.9676	1	1	54.1152	31.1071
DATA	1404	17	44	0	0	A_44_P280755	NM_148890	1533.53	302.721	6.145768e+001	6.980215e+000	117	29.5	7.723050e+000	0	0	0	0	0	0	58.2073	1	1	46.8651	31.6429
DATA	1405	17	45	0	0	A_42_P629062	AF072835	1558.59	302.845	6.743804e+002	6.751986e+001	666	30.5	8.127999e+000	0	0	0	0	0	0	636.12	1	1	47.5395	32.2667
DATA	1406	17	46	0	0	A_64_P131141	ENSRNOT00000012638	1584.5	303	6.264562e+001	7.098143e+000	121	35.5	1.061846e+001	0	0	0	0	0	0	58.8351	1	1	54.1152	34.3611
DATA	1407	17	47	0	0	A_42_P756350	NM_021772	1609.61	303.069	8.686052e+001	9.310418e+000	148.5	36	1.040490e+001	0	0	0	0	0	0	81.2224	1	1	53.8203	36.1905
DATA	1408	17	48	66	-1	(-)3xSLv1	NegativeControl	1635.5	303	3.378784e+000	3.367664e+000	54	40	1.442043e+001	0	0	0	0	0	0	-6.6098	0	0	54.1152	42.7778
DATA	1409	17	49	0	0	A_64_P124796	A_64_P124796	1660.5	303	2.656016e+001	4.301165e+000	83.5	31	9.230817e+000	0	0	0	0	0	0	24.6081	1	1	54.1152	32.1481
DATA	1410	17	50	0	0	A_44_P288443	NM_001108878	1685.86	303.192	6.842482e+002	6.850920e+001	704.5	31.5	7.132893e+000	0	0	0	0	0	0	630.972	1	1	47.5395	32.1333
DATA	1411	17	51	0	0	A_42_P748004	NM_001135873	1711.24	303	1.789285e+003	1.789611e+002	1641	35	8.453493e+000	0	0	0	0	0	0	1641.93	1	1	46.8651	35
DATA	1412	17	52	0	0	A_64_P067310	NM_001139507	1736.87	303	1.855451e+003	1.855769e+002	1780.5	34.5	8.039619e+000	0	0	0	0	0	0	1694.18	1	1	48.5334	33.9706
DATA	1413	17	53	0	0	A_44_P210809	NM_001107334	1762.13	302.773	1.472837e+002	1.512708e+001	192.5	33	9.234431e+000	0	0	0	0	0	0	133.808	1	1	47.8731	33.0333
DATA	1414	17	54	1028	1	(+)E1A_r60_a104	E1A_r60_a104	1787.5	303.352	6.357823e+000	3.525190e+000	65	33	7.679863e+000	0	0	0	0	0	0	5.74743	1	0	57.5363	31.8621
DATA	1415	17	55	0	0	A_44_P1042711	NM_001108426	1813	303.455	1.608544e+002	1.645869e+001	208	31	7.376205e+000	0	0	0	0	0	0	144.666	1	1	65	30.9429
DATA	1416	17	56	0	0	A_42_P661992	TC596141	1837.88	302.956	3.469254e+002	3.486898e+001	370	31	7.760491e+000	0	0	0	0	0	0	310.403	1	1	46.8651	30.6757
DATA	1417	17	57	0	0	A_42_P565621	NM_001105971	1863.44	303.307	2.300153e+002	2.326954e+001	265	27.5	8.448020e+000	0	0	0	0	0	0	204.736	1	1	49.1849	30.5357
DATA	1418	17	58	0	0	A_44_P264600	NM_001013132	1888.9	303.104	1.751380e+002	1.786802e+001	219	33	6.772872e+000	0	0	0	0	0	0	155.067	1	1	46.8651	32.5556
DATA	1419	17	59	0	0	A_64_P034901	TC591400	1914.5	303.352	1.108358e+001	3.727431e+000	72	30	6.176389e+000	0	0	0	0	0	0	9.76201	1	0	57.5363	28.8276
DATA	1420	17	60	0	0	A_42_P468216	NM_001030026	1939.5	303.444	3.183724e+003	3.183925e+002	2789	31	6.597693e+000	0	0	0	0	0	0	2789.68	1	1	48.5334	30.3793
DATA	1421	17	61	0	0	A_64_P062855	XM_343708	1965.42	303.427	1.760754e+001	4.004347e+000	75	35	9.166691e+000	0	0	0	0	0	0	15.3458	1	0	57.5363	34.6875
DATA	1422	17	62	0	0	A_64_P048421	AABR03055399	1990.58	303.427	6.165660e+000	3.667350e+000	65	35.5	2.103353e+001	0	0	0	0	0	0	5.34589	1	0	57.5363	39.9333
DATA	1423	17	63	0	0	A_44_P342166	NM_013187	2016.03	303.127	1.972036e+002	2.005244e+001	226	29.5	1.211088e+001	0	0	0	0	0	0	170.085	1	1	46.8651	31.3125
DATA	1424	17	64	0	0	A_42_P748154	XM_001059949	2041.33	302.761	4.413733e+003	4.413884e+002	3735	31	1.276800e+001	0	0	0	1	0	0	3786.98	1	1	46.1809	32.5143
DATA	1425	17	65	0	0	A_64_P157763	A_64_P157763	2066.53	303.303	1.601002e+003	1.601423e+002	1360	32	8.137296e+000	0	0	0	0	0	0	1366.86	1	1	49.1849	32.2917
DATA	1426	17	66	0	0	A_64_P155645	NM_022706	2092	303.5	1.105024e+004	1.105030e+003	9076	32	8.254421e+000	0	0	0	0	0	0	9386.97	1	1	48.5334	33.2759
DATA	1427	17	67	0	0	A_42_P622436	NM_022298	2117.58	303.427	9.014537e+004	9.014538e+003	75907	39	1.337121e+001	0	0	0	0	0	0	76193.5	1	1	57.5363	41.5926
DATA	1428	17	68	0	0	A_44_P304190	NM_001014044	2142.81	303.29	1.894034e+002	1.930347e+001	214.5	31.5	8.066391e+000	0	0	0	0	0	0	159.31	1	1	46.8651	33.1
DATA	1429	17	69	1028	1	(+)E1A_r60_a104	E1A_r60_a104	2168.86	303.53	8.276548e+000	3.835076e+000	69	30.5	6.204765e+000	0	0	0	0	0	0	6.92785	1	0	51.0895	30.4706
DATA	1430	17	70	0	0	A_42_P771373	NM_012614	2193.56	303.26	1.494675e+004	1.494680e+003	11707	29.5	6.474726e+000	0	0	0	1	0	0	12453.7	1	1	49.5074	29.7273
DATA	1431	17	71	0	0	A_64_P101976	A_64_P101976	2219.56	303.455	3.473831e+001	5.133327e+000	85	29	7.307042e+000	0	0	0	0	0	0	28.8109	1	1	49.8279	29.75
DATA	1432	17	72	0	0	A_42_P777935	ENSRNOT00000027369	2244.26	303.206	2.739230e+002	2.765405e+001	290	28	7.980508e+000	0	0	0	1	0	0	226.198	1	1	46.1809	29.3667
DATA	1433	17	73	0	0	A_64_P041521	NM_012945	2270.11	303.5	1.552316e+002	1.598438e+001	186.5	26	1.005576e+001	0	0	0	0	0	0	127.64	1	1	56.9804	29.4194
DATA	1434	17	74	0	0	A_44_P102661	NM_138862	2295.2	303.493	1.856562e+003	1.856956e+002	1584	30	9.241767e+000	0	0	0	0	0	0	1520.39	1	1	49.5074	30.5556
DATA	1435	17	75	0	0	A_42_P714166	NM_001017491	2320.67	303.5	5.961261e+000	3.888639e+000	61	27	4.191920e+000	0	0	0	0	0	0	4.86263	1	0	57.5363	28.0588
DATA	1436	17	76	0	0	A_64_P098703	NM_198728	2346.06	303.536	8.663625e+002	8.672207e+001	770	29	5.629794e+000	0	0	0	0	0	0	704.061	1	1	47.5395	29.1379
DATA	1437	17	77	0	0	A_44_P624151	NM_001107932	2371.51	303.13	7.770372e+002	7.780009e+001	672.5	29	7.897122e+000	0	0	0	0	0	0	629.169	1	1	47.2035	27.3103
DATA	1438	17	78	0	0	A_42_P674843	NM_001008880	2396.69	303.338	8.275031e+002	8.284140e+001	715.5	30	6.312607e+000	0	0	0	0	0	0	667.852	1	1	48.5334	29.8148
DATA	1439	17	79	0	0	A_44_P1039634	NM_001108924	2422.5	303.5	9.927523e+001	1.066462e+001	139	33	7.829039e+000	0	0	0	0	0	0	79.8722	1	1	57.5363	32.4231
DATA	1440	17	80	0	0	A_42_P517253	NM_001012275	2447.46	303.539	4.258312e+002	4.276197e+001	403	29	7.118853e+000	0	0	0	0	0	0	341.641	1	1	49.5074	28.7037
DATA	1441	17	81	0	0	A_42_P485589	NM_017246	2473.33	303.5	1.190444e+002	1.253242e+001	154.5	28	7.305115e+000	0	0	0	0	0	0	95.2527	1	1	57.5363	28.4
DATA	1442	17	82	66	1	DarkCorner	DarkCorner	2498.5	303.5	3.939524e+000	3.926867e+000	58	30.5	8.517877e+000	0	0	0	0	0	0	0.392462	0	0	57.5363	29.5357
DATA	1443	17	83	66	1	DarkCorner	DarkCorner	2524	303.545	3.947710e+000	3.934717e+000	56	27	7.588022e+000	0	0	0	0	0	0	-1.58046	0	0	55.8519	27.7568
DATA	1444	17	84	66	1	DarkCorner	DarkCorner	2549.42	303.573	3.954744e+000	3.941728e+000	55	25	6.859489e+000	0	0	0	0	0	0	-1.43537	0	0	57.5363	25.9118
DATA	1445	17	85	66	1	DarkCorner	DarkCorner	2574.85	303.709	3.960472e+000	3.947439e+000	57	26	7.570996e+000	0	0	0	0	0	0	0.0265109	0	0	49.8279	26.4048
DATA	1446	18	1	66	1	DarkCorner	DarkCorner	454.459	309.851	3.525617e+000	3.516028e+000	64.5	27	7.452232e+000	0	0	0	0	0	0	1.06142	0	0	48.5334	28.7949
DATA	1447	18	2	66	1	DarkCorner	DarkCorner	480.13	309.464	3.495309e+000	3.486370e+000	63	29	9.298575e+000	0	0	0	0	0	0	1.20295	0	0	46.5243	30.2222
DATA	1448	18	3	66	1	DarkCorner	DarkCorner	505.044	309.75	3.467233e+000	3.455821e+000	57	29	8.706766e+000	0	0	0	0	0	0	-4.42859	0	0	46.1809	30.5952
DATA	1449	18	4	0	0	A_42_P608713	TC595074	530.085	309.901	6.123581e+002	6.133176e+001	610	33	8.052753e+000	0	0	0	0	0	0	559.707	1	1	46.8651	31.8056
DATA	1450	18	5	0	0	A_44_P411771	XM_001056376	556	310	8.646677e+002	8.653373e+001	856	31	7.078518e+000	0	0	0	0	0	0	796.3	1	1	65	30.4815
DATA	1451	18	6	0	0	A_42_P703647	NM_001108688	581.371	309.957	3.012003e+001	4.527329e+000	90	29	6.711672e+000	0	0	0	0	0	0	27.9321	1	1	46.8651	27.8108
DATA	1452	18	7	0	0	A_64_P139212	NM_001030052	606.5	309.742	2.635593e+004	2.635595e+003	24502	31	7.271299e+000	0	0	0	0	0	0	24600.2	1	1	46.5243	31.2222
DATA	1453	18	8	0	0	A_64_P082461	FQ211879	632	309.797	1.500724e+002	1.537386e+001	203	32.5	6.838081e+000	0	0	0	0	0	0	140.948	1	1	46.8651	33.7059
DATA	1454	18	9	0	0	A_64_P144053	NM_001108100	657.438	310.027	3.818876e+002	3.833263e+001	405	31.5	7.645102e+000	0	0	0	0	0	0	360.764	1	1	48.5334	32.4375
DATA	1455	18	10	0	0	A_42_P455802	NM_001013929	682.74	310.055	4.807205e+003	4.807318e+002	4519.5	34	7.742490e+000	0	0	0	0	0	0	4565.85	1	1	47.8731	34.1154
DATA	1456	18	11	0	0	A_44_P575367	ENSRNOT00000068160	708.556	310.389	1.398186e+001	3.568567e+000	74.5	30.5	4.642260e+000	0	0	0	0	0	0	13.3483	1	0	47.5395	30.3667
DATA	1457	18	12	0	0	A_64_P008259	ENSRNOT00000040453	733.573	309.987	3.433918e+003	3.434073e+002	3377	32	6.165225e+000	0	0	0	0	0	0	3293.24	1	1	49.1849	30.52
DATA	1458	18	13	0	0	A_44_P433935	NM_001024894	758.944	309.875	1.035938e+001	3.415369e+000	73	29	7.594236e+000	0	0	0	0	0	0	9.97747	1	0	46.8651	27.3793
DATA	1459	18	14	0	0	A_64_P027747	TC585156	784.5	309.821	8.745420e+003	8.745480e+002	8309.5	33	7.491788e+000	0	0	0	0	0	0	8456.24	1	1	49.1849	32.2424
DATA	1460	18	15	0	0	A_44_P247880	ENSRNOT00000032333	809.947	309.88	1.265177e+001	3.469062e+000	73	32	7.442850e+000	0	0	0	0	0	0	12.2772	1	0	47.5395	31.6296
DATA	1461	18	16	0	0	A_44_P422321	NM_001105813	834.785	309.892	2.286322e+003	2.286549e+002	2251	31	6.824043e+000	0	0	0	0	0	0	2225.6	1	1	45.835	31.3514
DATA	1462	18	17	0	0	A_44_P374824	ENSRNOT00000025777	860.5	310	4.388959e+001	5.437950e+000	104.5	31	7.366669e+000	0	0	0	0	0	0	42.8483	1	1	54.1152	32.037
DATA	1463	18	18	0	0	A_64_P029482	A_64_P029482	886.093	310.065	5.697042e+001	6.535472e+000	117	36	9.516383e+000	0	0	0	0	0	0	55.7603	1	1	54.4085	35.8077
DATA	1464	18	19	0	0	A_64_P083918	NM_053396	911.162	310.132	2.272634e+001	3.921333e+000	83	29	5.198635e+000	0	0	0	0	0	0	22.2916	1	1	46.1809	28.3226
DATA	1465	18	20	1028	1	(+)E1A_r60_3	E1A_r60_3	936.912	310.386	3.714683e+001	4.896141e+000	98.5	33	6.816174e+000	0	0	0	0	0	0	36.5054	1	1	57.259	33.0909
DATA	1466	18	21	0	0	A_42_P508415	CV108834	962.203	309.859	1.314751e+002	1.352778e+001	187	34.5	7.687119e+000	0	0	0	0	0	0	129.394	1	1	45.4864	33.3824
DATA	1467	18	22	0	0	A_64_P018331	NM_001107720	987.5	309.735	2.030236e+003	2.030485e+002	1970	34.5	8.770667e+000	0	0	0	0	0	0	2000.46	1	1	46.5243	33.4643
DATA	1468	18	23	0	0	A_64_P142056	NM_001011938	1012.73	309.823	1.056283e+004	1.056288e+003	10244	32	8.766784e+000	0	0	0	0	0	0	10417.2	1	1	44.7812	32.1471
DATA	1469	18	24	0	0	A_44_P1030098	NM_001105866	1038.5	310.352	2.167340e+002	2.190491e+001	270	31.5	7.364468e+000	0	0	0	0	0	0	213.883	1	1	57.5363	32.3462
DATA	1470	18	25	0	0	A_64_P125958	NM_177933	1063.58	310.427	4.930100e+001	5.864203e+000	108	30	5.632473e+000	0	0	0	0	0	0	48.6662	1	1	65	29.2895
DATA	1471	18	26	0	0	A_64_P002066	XM_001056138	1089.42	310.427	7.252669e+001	7.917356e+000	130	30.5	5.465852e+000	0	0	0	0	0	0	71.5918	1	1	57.5363	30.5526
DATA	1472	18	27	0	0	A_42_P521242	ENSRNOT00000003841	1114.37	309.735	1.072213e+003	1.072684e+002	1103	30	8.404486e+000	0	0	0	0	0	0	1058	1	1	46.5243	30.6538
DATA	1473	18	28	0	0	A_42_P652827	NM_001024274	1139.39	309.871	3.853343e+003	3.853474e+002	3717	35.5	1.250370e+001	0	0	0	0	0	0	3800.15	1	1	47.2035	38.75
DATA	1474	18	29	0	0	A_42_P533792	NM_001106575	1165.06	309.627	9.963912e+003	9.963963e+002	9575	33.5	8.237844e+000	0	0	0	0	0	0	9817.65	1	1	45.835	33
DATA	1475	18	30	1028	1	(+)E1A_r60_1	E1A_r60_1	1190.58	310.427	3.613679e+000	3.204937e+000	66	31	1.036959e+001	0	0	0	0	0	0	3.55693	1	0	65	32.1818
DATA	1476	18	31	0	0	A_64_P210103	NM_001100666	1216.42	310.427	8.322274e+001	8.912343e+000	146.5	29.5	8.155573e+000	0	0	0	0	0	0	81.8006	1	1	57.5363	30.8235
DATA	1477	18	32	0	0	A_64_P131745	A_64_P131745	1241.75	309.968	5.500051e+001	6.360383e+000	112	33	8.597886e+000	0	0	0	0	0	0	53.9697	1	1	45.4864	32.931
DATA	1478	18	33	0	0	A_64_P017791	XM_002727063	1267	310.455	1.370470e+001	3.481266e+000	74	31	7.230886e+000	0	0	0	0	0	0	13.4235	1	0	55.8519	30.3333
DATA	1479	18	34	0	0	A_42_P560288	NM_198788	1292.06	310.232	1.286225e+004	1.286229e+003	12216	28	7.938714e+000	0	0	0	0	0	0	12571.7	1	1	46.5243	29.5938
DATA	1480	18	35	0	0	A_42_P571463	NM_001013221	1317.43	310.239	2.107325e+003	2.107570e+002	2094	28.5	7.741217e+000	0	0	0	0	0	0	2054.91	1	1	46.5243	30.7333
DATA	1481	18	36	0	0	A_42_P648207	NM_001013882	1343.33	310.5	7.035358e+002	7.042736e+001	740.5	34	9.034823e+000	0	0	0	0	0	0	684.263	1	1	57.5363	34.7188
DATA	1482	18	37	0	0	A_64_P120833	NM_131910	1368.09	309.969	1.258525e+004	1.258529e+003	11714.5	36.5	8.030613e+000	0	0	0	0	0	0	12206.6	1	1	46.5243	35.25
DATA	1483	18	38	0	0	A_42_P705337	TC582694	1393.58	309.899	3.504662e+003	3.504812e+002	3326	33	7.815839e+000	0	0	0	0	0	0	3389.01	1	1	47.2035	32.0588
DATA	1484	18	39	0	0	A_44_P544340	NM_001034939	1419	309.774	5.625782e+002	5.635173e+001	596	32	6.700477e+000	0	0	0	0	0	0	542.274	1	1	45.4864	30.2162
DATA	1486	18	41	0	0	A_44_P310596	NM_001014166	1469.82	310.316	7.693560e+002	7.700524e+001	780	29	8.542784e+000	0	0	0	0	0	0	736.518	1	1	49.5074	31.6667
DATA	1487	18	42	0	0	A_64_P013409	A_64_P013409	1495.84	310.414	8.408823e+000	3.392593e+000	68	29	6.839189e+000	0	0	0	0	0	0	8.01933	1	0	47.2035	29.7941
DATA	1488	18	43	0	0	A_64_P076485	A_64_P076485	1520.89	310.5	2.049239e+003	2.049504e+002	2001.5	31	6.304910e+000	0	0	0	0	0	0	1946.85	1	1	56.9804	31.7576
DATA	1489	18	44	0	0	A_64_P096121	ENSRNOT00000028891	1546.5	310.5	6.949346e+001	7.698586e+000	127	30	6.695368e+000	0	0	0	0	0	0	65.7525	1	1	57.5363	31.8065
DATA	1490	18	45	0	0	A_42_P521086	NM_001100857	1571.67	310.5	6.379522e+001	7.194769e+000	126	31	7.835281e+000	0	0	0	0	0	0	60.1107	1	1	57.5363	31.9655
DATA	1491	18	46	0	0	A_64_P143133	TC637520	1597.38	310.31	1.379489e+001	3.614898e+000	74	31	1.069067e+001	0	0	0	0	0	0	12.9409	1	0	48.2044	33.0968
DATA	1492	18	47	0	0	A_64_P067163	NM_017248	1622.5	310.5	4.730628e+004	4.730629e+003	43627	40	1.470506e+001	0	0	0	0	0	0	44183.8	1	1	57.5363	42.0588
DATA	1493	18	48	0	0	A_64_P118288	NM_053448	1647.27	310.379	4.074588e+002	4.088509e+001	438.5	31	8.573214e+000	0	0	0	0	0	0	378.863	1	1	46.1809	31.2
DATA	1494	18	49	0	0	A_64_P112342	A_64_P112342	1672.93	310.203	4.337204e+001	5.503106e+000	100.5	30	9.940833e+000	0	0	0	0	0	0	40.1367	1	1	46.8651	32.0571
DATA	1495	18	50	0	0	A_64_P074741	NM_001077680	1698.58	310.573	7.646221e+001	8.369446e+000	128	30	7.894127e+000	0	0	0	0	0	0	70.4214	1	1	57.5363	30.4
DATA	1496	18	51	0	0	A_64_P153062	NM_001107890	1723.86	310.564	3.897961e+002	3.912934e+001	410	31.5	7.885713e+000	0	0	0	0	0	0	357.262	1	1	50.1463	32.4063
DATA	1497	18	52	0	0	A_64_P051942	A_64_P051942	1749.46	310.588	3.339481e+002	3.357122e+001	369.5	30.5	8.205964e+000	0	0	0	0	0	0	304.552	1	1	46.8651	31.5
DATA	1498	18	53	0	0	A_44_P233080	ENSRNOT00000026303	1774.93	310.268	6.707328e+003	6.707417e+002	5949.5	33.5	8.135346e+000	0	0	0	0	0	0	6085.82	1	1	47.5395	31.9643
DATA	1499	18	54	0	0	A_64_P127747	A_64_P127747	1800.1	310.145	1.184148e+002	1.234003e+001	167	31	6.732019e+000	0	0	0	0	0	0	106.9	1	1	46.8651	30.4848
DATA	1500	18	55	0	0	A_42_P773155	NM_001106996	1825.58	310.573	3.462873e+004	3.462874e+003	30194	30	6.012663e+000	0	0	0	1	0	0	31102.9	1	1	57.5363	29.3214
DATA	1501	18	56	0	0	A_64_P003624	NM_175591	1851	310.545	4.539661e+001	5.737098e+000	101	29	6.430035e+000	0	0	0	0	0	0	40.5635	1	1	55.8519	29.3514
DATA	1502	18	57	0	0	A_64_P148728	NM_030989	1876.38	310.444	4.784843e+002	4.797819e+001	487.5	33	7.662203e+000	0	0	0	0	0	0	425.317	1	1	48.2044	34.069
DATA	1503	18	58	0	0	A_44_P436284	ENSRNOT00000031389	1901.49	310.811	4.096935e+002	4.112238e+001	408.5	29.5	6.327378e+000	0	0	0	0	0	0	362.318	1	1	48.8603	30.4643
DATA	1504	18	59	0	0	A_42_P626851	NM_001107917	1926.89	310.736	1.245445e+003	1.245954e+002	1117	32	6.846670e+000	0	0	0	0	0	0	1095.66	1	1	47.8731	30.4242
DATA	1505	18	60	0	0	A_42_P797303	TC587453	1952.06	310.768	2.043304e+004	2.043307e+003	17419.5	34	5.854325e+000	0	0	0	0	0	0	17882.8	1	1	46.5243	32.1613
DATA	1506	18	61	0	0	A_64_P096312	A_64_P096312	1978	310.545	4.171083e+003	4.171239e+002	4024.5	35.5	1.284508e+001	0	0	0	0	0	0	3630.93	1	1	55.8519	37.8125
DATA	1507	18	62	0	0	A_64_P150894	A_64_P150894	2003.32	310.618	4.618788e+002	4.632948e+001	449	31	1.235091e+001	0	0	0	0	0	0	399.994	1	1	46.5243	32.2143
DATA	1508	18	63	0	0	A_64_P241372	NM_001000593	2028.58	310.573	4.048340e+001	5.442864e+000	93	31	8.977867e+000	0	0	0	0	0	0	34.8795	1	1	57.5363	30.1892
DATA	1509	18	64	0	0	A_44_P433621	NM_001025016	2054.29	310.614	5.533069e+002	5.545140e+001	530	27.5	6.942309e+000	0	0	0	0	0	0	474.259	1	1	47.5395	27.75
DATA	1510	18	65	0	0	A_64_P163511	NM_013190	2079.5	310.789	2.098483e+003	2.098804e+002	1779.5	31	6.302645e+000	0	0	0	0	0	0	1789.75	1	1	49.8279	30.84
DATA	1511	18	66	0	0	A_44_P129412	AF155959	2105	310.545	2.952556e+003	2.952787e+002	2407	38.5	1.663136e+001	0	0	0	0	0	0	2505.46	1	1	55.8519	41.4667
DATA	1512	18	67	0	0	A_64_P143037	NM_001025134	2130.5	310.648	4.612095e+002	4.627009e+001	449	34	7.933995e+000	0	0	0	0	0	0	389.457	1	1	57.5363	35.6552
DATA	1513	18	68	0	0	A_64_P032693	XM_002724830	2155.53	311	2.280913e+001	4.371559e+000	75.5	30	4.951188e+000	0	0	0	0	0	0	19.171	1	1	48.5334	29.9706
DATA	1514	18	69	0	0	A_42_P727368	NM_001025693	2181.12	310.515	8.694991e+001	9.468177e+000	133	31	7.720104e+000	0	0	0	1	0	0	72.7274	1	1	45.1352	31
DATA	1515	18	70	0	0	A_64_P075765	A_64_P075765	2205.84	310.441	1.472827e+001	4.042186e+000	69	30	7.521733e+000	0	0	0	0	0	0	12.264	1	0	45.835	30.2
DATA	1516	18	71	0	0	A_42_P639174	NM_001106592	2232	310.789	2.014669e+003	2.015023e+002	1655	28	7.950392e+000	0	0	0	0	0	0	1670.02	1	1	46.8651	29.6389
DATA	1517	18	72	0	0	A_64_P063135	NM_001109623	2257.55	310.629	9.037268e+001	9.802896e+000	136.5	26	7.502666e+000	0	0	0	0	0	0	74.5852	1	1	44.4243	26.04
DATA	1518	18	73	0	0	A_64_P018236	NM_001108882	2282.73	310.761	4.408334e+000	3.838970e+000	61	31	1.001850e+001	0	0	0	0	0	0	3.62334	1	0	47.2035	31.2963
DATA	1519	18	74	0	0	A_43_P14648	NM_001012034	2307.79	310.806	1.055798e+003	1.056492e+002	895	27	4.990313e+000	0	0	0	0	0	0	864.38	1	1	47.5395	26.6452
DATA	1520	18	75	0	0	A_42_P698520	NM_001108216	2333.44	310.973	8.980175e+003	8.980257e+002	7130	29	5.107370e+000	0	0	0	0	0	0	7324.01	1	1	48.5334	29.9091
DATA	1521	18	76	0	0	A_43_P19450	NM_001105713	2358.79	311	1.711610e+002	1.754534e+001	200	28	5.821863e+000	0	0	0	0	0	0	139.091	1	1	46.8651	27.4138
DATA	1522	18	77	0	0	A_64_P013012	XM_225619	2384.5	311	6.163754e+002	6.175895e+001	561	29	8.838049e+000	0	0	0	0	0	0	499.151	1	1	48.5334	29.5
DATA	1523	18	78	0	0	A_42_P499684	NM_001108642	2409.64	310.87	7.126436e+002	7.137008e+001	646	28	7.832968e+000	0	0	0	1	0	0	575.263	1	1	46.8651	29.6538
DATA	1524	18	79	0	0	A_64_P297479	ENSRNOT00000044350	2434.72	310.97	2.477702e+004	2.477705e+003	20916.5	29	7.537496e+000	0	0	0	0	0	0	19942.3	1	1	45.835	30.4231
DATA	1525	18	80	0	0	A_64_P103238	NM_001014158	2460.23	310.884	6.114200e+002	6.126659e+001	564	29	6.163538e+000	0	0	0	0	0	0	490.751	1	1	46.5243	29.5641
DATA	1526	18	81	0	0	A_42_P751562	NM_001037355	2485.81	311.025	5.200754e+003	5.200902e+002	4186	28.5	7.548165e+000	0	0	0	1	0	0	4164.07	1	1	49.1849	28.8438
DATA	1527	18	82	66	1	DarkCorner	DarkCorner	2511.5	311	3.936583e+000	3.925551e+000	58	30	8.762575e+000	0	0	0	0	0	0	0.981693	0	0	54.1152	30.4872
DATA	1528	18	83	66	1	DarkCorner	DarkCorner	2537.66	311.015	3.944353e+000	3.931371e+000	52.5	27	7.175585e+000	0	0	0	0	0	0	-4.87921	0	0	46.1809	26.7561
DATA	1529	18	84	66	1	DarkCorner	DarkCorner	2562.61	311.122	3.950522e+000	3.937520e+000	55	23.5	7.931202e+000	0	0	0	0	0	0	-0.904512	0	0	48.5334	25.3056
DATA	1530	18	85	66	1	DarkCorner	DarkCorner	2587.5	311	5.093057e+000	3.975464e+000	60	25	6.796049e+000	0	0	0	0	0	0	4.04903	1	0	65	26.3747
DATA	1531	19	1	66	1	DarkCorner	DarkCorner	441.5	317	4.422615e+000	3.554085e+000	66	27	6.848759e+000	0	0	0	0	0	0	3.93103	1	0	54.1152	27.1355
DATA	1532	19	2	66	1	DarkCorner	DarkCorner	466.702	316.917	3.507463e+000	3.497304e+000	64	30	6.496820e+000	0	0	0	0	0	0	0.882165	0	0	50.1463	29.7188
DATA	1533	19	3	66	1	DarkCorner	DarkCorner	492.25	317.469	3.477821e+000	3.466375e+000	59	29	7.956573e+000	0	0	0	0	0	0	-3.05499	0	0	44.7812	30.225
DATA	1534	19	4	66	1	DarkCorner	DarkCorner	518.42	317.29	3.449542e+000	3.438189e+000	57	34	8.177518e+000	0	0	0	0	0	0	-4.21035	0	0	46.8651	33.5
DATA	1535	19	5	0	0	A_44_P198705	NM_012578	544.308	316.538	1.506896e+004	1.506900e+003	13925	31	7.469040e+000	0	0	0	0	0	0	13842.5	1	1	48.8603	31.0857
DATA	1536	19	6	0	0	A_42_P604252	NM_001108797	568.522	316.812	9.929917e+002	9.935698e+001	999	28	6.382807e+000	0	0	0	0	0	0	918.429	1	1	47.2035	27.4667
DATA	1537	19	7	0	0	A_43_P20016	NM_001107377	594.088	317.386	1.126110e+002	1.175333e+001	169	30.5	6.981420e+000	0	0	0	0	0	0	104.872	1	1	57.259	29.5333
DATA	1538	19	8	0	0	A_42_P491486	NM_022533	619.227	316.727	3.803495e+003	3.803642e+002	3456	32	6.184352e+000	0	0	0	0	0	0	3564.18	1	1	45.4864	32.0606
DATA	1539	19	9	0	0	A_64_P345929	NM_001191639	644.582	317.427	3.337106e+001	4.710701e+000	91.5	31	5.135681e+000	0	0	0	0	0	0	31.4607	1	1	57.5363	31.4412
DATA	1540	19	10	0	0	A_64_P152047	NM_001000521	670.362	316.621	1.944818e+001	3.835907e+000	81	34	9.584058e+000	0	0	0	0	0	0	18.4374	1	1	42.2201	34.3333
DATA	1541	19	11	0	0	A_42_P724510	NM_001007625	695.5	317.289	1.785434e+004	1.785437e+003	16714.5	32	5.524484e+000	0	0	0	0	0	0	17014.9	1	1	49.1849	30.7917
DATA	1542	19	12	0	0	A_42_P552906	NM_001007701	720.795	317.26	2.612382e+003	2.612587e+002	2496.5	31	6.455493e+000	0	0	0	0	0	0	2501.55	1	1	48.5334	31.0625
DATA	1543	19	13	0	0	A_64_P121673	A_64_P121673	746.278	316.889	2.162647e+001	3.911187e+000	82.5	30	7.950654e+000	0	0	0	0	0	0	20.8009	1	1	47.8731	29.2903
DATA	1544	19	14	0	0	A_64_P047470	NM_001008875	771.925	317.03	6.722972e+001	7.465323e+000	124	29	7.826753e+000	0	0	0	0	0	0	64.9319	1	1	46.8651	28.4839
DATA	1545	19	15	0	0	A_43_P14911	NM_031512	797.418	317.427	8.110911e+001	8.731565e+000	144	33.5	7.069856e+000	0	0	0	0	0	0	78.6337	1	1	57.5363	32.7813
DATA	1546	19	16	0	0	A_44_P117234	NM_001191788	822.254	316.851	3.961511e+001	5.106799e+000	97.5	33.5	6.274160e+000	0	0	0	0	0	0	38.5307	1	1	45.835	33.4286
DATA	1547	19	17	0	0	A_64_P066782	ENSRNOT00000046676	848	317.455	6.944906e+002	6.952332e+001	727	31	6.738346e+000	0	0	0	0	0	0	677.596	1	1	55.8519	31.303
DATA	1548	19	18	0	0	A_64_P125013	NM_019167	873.418	317.427	5.546608e+004	5.546609e+003	53838	37	8.161165e+000	0	0	0	0	0	0	54261.9	1	1	57.5363	36.2692
DATA	1549	19	19	0	0	A_64_P143121	NM_001099510	898.582	317.427	1.863402e+001	3.700090e+000	79	35	9.754210e+000	0	0	0	0	0	0	18.2718	1	1	57.5363	35.2308
DATA	1550	19	20	0	0	A_64_P065600	NM_022954	924.187	317.387	7.149263e+000	3.269296e+000	69	30	5.927669e+000	0	0	0	0	0	0	7.02448	1	0	49.1849	30.1176
DATA	1551	19	21	0	0	A_44_P300818	AF030087	949.234	316.703	1.231534e+003	1.231946e+002	1271	34.5	7.048274e+000	0	0	0	0	0	0	1211.97	1	1	45.1352	33.3333
DATA	1552	19	22	0	0	A_64_P103130	A_64_P103130	974.938	316.969	2.951921e+003	2.952093e+002	3112.5	31.5	8.147986e+000	0	0	0	0	0	0	2909.1	1	1	46.8651	32.3056
DATA	1553	19	23	0	0	A_64_P064938	NM_001109332	1000.42	317.427	1.934224e+001	3.719613e+000	79	33	1.076733e+001	0	0	0	0	0	0	19.0825	1	1	57.5363	33.25
DATA	1554	19	24	0	0	A_64_P087276	NM_138527	1025.67	317.5	3.185291e+000	3.174808e+000	57	31.5	7.586799e+000	0	0	0	0	0	0	-2.29053	0	0	57.5363	32.6786
DATA	1555	19	25	0	0	A_64_P032728	NM_001037778	1050.69	317.338	2.000415e+004	2.000417e+003	19174.5	29.5	6.286983e+000	0	0	0	0	0	0	19758.3	1	1	48.5334	31.3846
DATA	1556	19	26	0	0	A_44_P956203	NM_001134992	1076.5	317.5	2.110343e+001	3.810701e+000	81	30.5	5.859398e+000	0	0	0	0	0	0	20.8473	1	1	65	30.8056
DATA	1557	19	27	0	0	A_64_P106488	A_64_P106488	1101.89	317.5	5.699467e+001	6.523410e+000	118	31	6.129152e+000	0	0	0	0	0	0	56.2944	1	1	56.9804	31.069
DATA	1558	19	28	0	0	A_43_P10011	NM_001025274	1126.94	317.379	9.712190e+002	9.717378e+001	1010	29	7.088774e+000	0	0	0	0	0	0	958.865	1	1	45.4864	29.4074
DATA	1559	19	29	0	0	A_44_P321009	NM_012540	1152.67	317.5	9.191596e+000	3.307405e+000	71.5	32	7.429711e+000	0	0	0	0	0	0	9.06827	1	0	57.5363	32.3438
DATA	1560	19	30	0	0	A_44_P133453	XM_236776	1177.8	317.239	3.482991e+003	3.483137e+002	3443	33	8.348331e+000	0	0	0	0	0	0	3432.84	1	1	46.8651	32.1935
DATA	1561	19	31	0	0	A_64_P027323	NM_001000088	1203.5	317.5	8.534396e+001	9.109061e+000	148	28	9.285572e+000	0	0	0	0	0	0	84.0118	1	1	49.1849	31.1143
DATA	1562	19	32	0	0	A_44_P374568	NM_001107778	1228.82	317.539	4.563089e+002	4.574219e+001	504	31	9.957976e+000	0	0	0	0	0	0	448.518	1	1	49.8279	33
DATA	1563	19	33	0	0	A_64_P040176	NM_001108498	1253.93	317.507	2.525889e+003	2.526091e+002	2489	33	9.013983e+000	0	0	0	0	0	0	2478.48	1	1	48.5334	32.5758
DATA	1564	19	34	0	0	A_64_P347204	ENSRNOT00000002350	1279.58	317.573	1.599750e+002	1.631457e+001	221.5	29	5.899283e+000	0	0	0	0	0	0	156.659	1	1	57.5363	28.1923
DATA	1565	19	35	0	0	A_64_P142544	A_64_P142544	1305.11	317.5	1.806289e+001	3.681566e+000	79	29	8.202457e+000	0	0	0	0	0	0	17.649	1	1	56.9804	31.303
DATA	1566	19	36	0	0	A_64_P047367	NM_017050	1330.5	317.5	7.859991e+004	7.859992e+003	76251	32	1.061036e+001	0	0	0	0	0	0	76611.5	1	1	57.5363	34.5313
DATA	1567	19	37	0	0	A_64_P130858	NM_001003705	1355.93	317.453	6.248803e+001	7.031682e+000	121	37.5	9.795367e+000	0	0	0	0	0	0	60.7449	1	1	48.8603	36.7778
DATA	1568	19	38	0	0	A_42_P647009	NM_053814	1381.06	317.382	2.926913e+003	2.927092e+002	2787.5	37	9.054991e+000	0	0	0	0	0	0	2837.18	1	1	46.1809	36.3529
DATA	1569	19	39	0	0	A_42_P618538	NM_001030031	1406.37	317.5	1.700449e+003	1.700759e+002	1663	33	8.662116e+000	0	0	0	0	0	0	1643.31	1	1	47.8731	32.9677
DATA	1570	19	40	0	0	A_64_P048225	NM_001108643	1431.86	317.676	2.686639e+001	4.219815e+000	84.5	33	8.061424e+000	0	0	0	0	0	0	25.8793	1	1	47.5395	33.1143
DATA	1571	19	41	0	0	A_64_P044826	A_64_P044826	1457.42	317.573	1.997008e+002	2.023529e+001	253	35	8.769068e+000	0	0	0	0	0	0	191.695	1	1	57.5363	34
DATA	1572	19	42	0	0	A_64_P046273	NM_001168559	1482.36	317.6	2.788179e+002	2.807371e+001	333.5	28	7.958717e+000	0	0	0	0	0	0	266.691	1	1	49.1849	30.2
DATA	1573	19	43	0	0	A_43_P16232	NM_024395	1507.99	317.616	1.243172e+003	1.243607e+002	1200	31	6.784787e+000	0	0	0	0	0	0	1184.57	1	1	48.8603	31.6333
DATA	1574	19	44	0	0	A_44_P147356	XM_225859	1533.68	317.622	1.372373e+004	1.372377e+003	12864.5	32	6.596676e+000	0	0	0	0	0	0	13024.7	1	1	51.0895	32.871
DATA	1575	19	45	0	0	A_44_P979417	ENSRNOT00000068382	1559	317.545	4.596442e+001	5.667898e+000	104	34	7.391257e+000	0	0	0	0	0	0	43.4446	1	1	55.8519	35.4545
DATA	1576	19	46	0	0	A_44_P283784	NM_001107682	1584.12	317.418	5.643918e+002	5.653735e+001	576	32	9.163960e+000	0	0	0	0	0	0	531.209	1	1	46.1809	32.4333
DATA	1577	19	47	0	0	A_44_P112061	ENSRNOT00000046359	1609.44	317.521	5.436337e+002	5.446617e+001	572	34	1.066536e+001	0	0	0	0	0	0	509.454	1	1	48.2044	33
DATA	1578	19	48	0	0	A_42_P541025	NM_212546	1635.53	317.806	3.267633e+002	3.284864e+001	364.5	36.5	1.045843e+001	0	0	0	0	0	0	304.821	1	1	47.8731	36.9545
DATA	1579	19	49	0	0	A_44_P156521	NM_001025135	1660.3	317.9	1.155273e+003	1.155766e+002	1120	29.5	9.927966e+000	0	0	0	0	0	0	1072.88	1	1	47.2035	31.375
DATA	1580	19	50	0	0	A_42_P562202	NM_001107959	1685.82	318.134	7.734522e+001	8.445265e+000	130	30	7.115937e+000	0	0	0	0	0	0	71.492	1	1	46.1809	29.6452
DATA	1581	19	51	0	0	A_42_P522899	NM_021578	1711.26	317.778	8.576547e+001	9.228729e+000	139.5	30.5	8.042546e+000	0	0	0	0	0	0	78.8897	1	1	47.5395	31.3571
DATA	1582	19	52	0	0	A_42_P581060	NM_001108722	1736.38	318	1.154393e+004	1.154398e+003	10036	30.5	6.186519e+000	0	0	0	0	0	0	10567.6	1	1	48.5334	30.8889
DATA	1583	19	53	0	1	ERCC-00043_129	ERCC-00043_129	1762.42	317.573	3.453178e+000	3.457029e+000	64.5	32	8.071952e+000	0	0	0	0	0	0	2.95065	0	0	57.5363	32.35
DATA	1584	19	54	0	0	A_64_P098577	A_64_P098577	1787.37	317.903	7.012782e+000	3.529066e+000	68	30.5	5.936168e+000	0	0	0	0	0	0	6.35544	1	0	44.0646	30.1429
DATA	1585	19	55	0	0	A_64_P043164	ENSRNOT00000009696	1812.91	317.935	4.488840e+002	4.502282e+001	467	31	6.916663e+000	0	0	0	0	0	0	404.734	1	1	54.4085	30.5667
DATA	1586	19	56	0	0	A_42_P576446	NM_001107673	1837.84	317.897	9.598926e+003	9.598990e+002	8310	30.5	6.574231e+000	0	0	0	0	0	0	8611.27	1	1	46.5243	30.9
DATA	1587	19	57	0	0	A_42_P801593	NM_001134744	1863.38	318	2.160334e+003	2.160620e+002	1911	31	7.450328e+000	0	0	0	0	0	0	1928.04	1	1	48.5334	31.3103
DATA	1588	19	58	0	0	A_42_P535743	NM_199393	1888.63	318	4.844196e+003	4.844324e+002	4106	33	7.457572e+000	0	0	0	0	0	0	4301.05	1	1	48.5334	32.3333
DATA	1589	19	59	0	0	A_64_P051890	ENSRNOT00000056631	1914.5	318	3.087502e+001	4.704119e+000	85	32	6.335028e+000	0	0	0	0	0	0	27.2682	1	1	54.1152	31.1515
DATA	1590	19	60	0	0	A_64_P098379	NM_001013890	1939.91	317.935	1.878477e+001	4.032004e+000	78	32	6.593088e+000	0	0	0	0	0	0	16.5039	1	1	54.4085	30.5294
DATA	1591	19	61	0	0	A_64_P144513	XR_086096	1965.5	318	7.270408e+004	7.270408e+003	63189	35	8.888194e+000	0	0	0	0	0	0	63542.9	1	1	54.1152	35
DATA	1592	19	62	0	0	A_44_P325337	NM_001030041	1990.23	317.914	9.970104e+001	1.060171e+001	147	32	1.294444e+001	0	0	0	0	0	0	86.6979	1	1	46.8651	35.0385
DATA	1593	19	63	0	0	A_44_P142029	NM_001002851	2015.76	318	9.427195e+003	9.427264e+002	7938	31	9.022577e+000	0	0	0	0	0	0	8155.45	1	1	46.8651	29.8
DATA	1594	19	64	0	0	A_44_P292568	NM_001000207	2041.44	318.028	1.407536e+002	1.453892e+001	181.5	31	9.556183e+000	0	0	0	0	0	0	121.138	1	1	48.2044	31.7778
DATA	1595	19	65	0	0	A_42_P624092	XR_007263	2066.38	318	9.382236e+003	9.382308e+002	7619	29	1.060144e+001	0	0	0	1	0	0	8034.64	1	1	48.5334	30.9048
DATA	1596	19	66	0	0	A_42_P597322	NM_001103357	2092.21	318.194	7.515475e+002	7.524473e+001	695	33	1.021332e+001	0	0	0	0	0	0	640.362	1	1	47.5395	33.6129
DATA	1597	19	67	0	0	A_64_P034409	NM_001108146	2117.64	318.219	2.136217e+003	2.136537e+002	1872.5	43	1.330399e+001	0	0	0	0	0	0	1811.24	1	1	44.7812	45.2174
DATA	1598	19	68	0	0	A_64_P112797	NM_001001121	2143	318.203	2.770101e+002	2.794898e+001	289	33	7.129625e+000	0	0	0	0	0	0	233.736	1	1	46.8651	32.6765
DATA	1599	19	69	0	0	A_42_P761023	NM_001144870	2168.06	317.956	3.914335e+002	3.932090e+001	380	31	7.698647e+000	0	0	0	0	0	0	328.726	1	1	46.8651	32.0588
DATA	1600	19	70	0	0	A_42_P465408	NM_031647	2193.52	317.855	1.082970e+003	1.083619e+002	917.5	31	1.456503e+001	0	0	0	1	0	0	905.245	1	1	47.2035	36.16
DATA	1601	19	71	0	0	A_64_P115761	NM_001109379	2219.62	318.062	3.644383e+001	5.241439e+000	89.5	28	7.166667e+000	0	0	0	0	0	0	30.3237	1	1	45.1352	28.6944
DATA	1602	19	72	0	0	A_64_P086487	A_64_P086487	2244.75	317.938	1.213878e+001	3.973510e+000	68	27.5	6.098898e+000	0	0	0	0	0	0	10.0564	1	0	45.4864	28.1
DATA	1603	19	73	0	0	A_42_P774028	NM_001017447	2269.63	318.127	3.159033e+003	3.159261e+002	2612	28	6.582144e+000	0	0	0	0	0	0	2606.4	1	1	47.5395	27.2692
DATA	1604	19	74	0	0	A_44_P233080	ENSRNOT00000026303	2295.63	318.171	6.495127e+003	6.495239e+002	5308	28	8.034136e+000	0	0	0	0	0	0	5336.66	1	1	49.8279	29.1212
DATA	1605	19	75	0	0	A_64_P078002	ENSRNOT00000056206	2320.61	318.069	2.733555e+001	4.705160e+000	81	29.5	4.924160e+000	0	0	0	0	0	0	22.3736	1	1	53.8203	28.1071
DATA	1606	19	76	0	0	A_64_P047888	A_64_P047888	2346.1	318.239	2.132862e+001	4.395895e+000	74	29	5.808427e+000	0	0	0	0	0	0	17.3928	1	1	45.835	29.175
DATA	1607	19	77	0	0	A_44_P236001	NM_001000623	2371.56	318.106	8.188835e+001	9.051919e+000	125	28.5	6.651316e+000	0	0	0	0	0	0	66.5402	1	1	45.4864	28
DATA	1608	19	78	0	0	A_42_P819040	TC636720	2397.09	318.386	1.829502e+001	4.280714e+000	75	29	8.723870e+000	0	0	0	0	0	0	14.8177	1	0	57.259	31.0345
DATA	1609	19	79	0	0	A_44_P168184	NM_001166675	2422.14	317.932	2.416412e+003	2.416724e+002	2047	26.5	5.834920e+000	0	0	0	0	0	0	1950.97	1	1	44.0646	27.75
DATA	1610	19	80	0	0	A_64_P094925	NM_001024748	2447.42	318.108	4.566172e+002	4.582738e+001	439	31.5	7.094960e+000	0	0	0	0	0	0	367.637	1	1	44.7812	30.4615
DATA	1611	19	81	0	0	A_44_P332483	NM_173338	2473.42	318.427	3.916101e+000	3.916456e+000	60	28	4.770654e+000	0	0	0	0	0	0	2.58428	0	0	57.5363	28.3226
DATA	1612	19	82	0	0	A_42_P530071	NM_001107153	2498.45	318.338	8.847664e+003	8.847750e+002	7027.5	28	8.274862e+000	0	0	0	1	0	0	7088.67	1	1	48.8603	30.16
DATA	1613	19	83	66	1	DarkCorner	DarkCorner	2523.74	318.813	3.932813e+000	3.919869e+000	57	29	6.715472e+000	0	0	0	0	0	0	-2.12976	0	0	50.4627	28.0488
DATA	1614	19	84	66	1	DarkCorner	DarkCorner	2549.15	318.716	3.939883e+000	3.926917e+000	53	27	6.495205e+000	0	0	0	0	0	0	-3.16867	0	0	48.2044	26.0811
DATA	1615	19	85	66	1	DarkCorner	DarkCorner	2574.9	318.382	3.946070e+000	3.936916e+000	59	27	8.202092e+000	0	0	0	0	0	0	1.38413	0	0	46.5243	26.9318
DATA	1616	20	1	66	1	DarkCorner	DarkCorner	454.584	324.091	5.227932e+000	3.545687e+000	67	28	7.555016e+000	0	0	0	0	0	0	4.67271	1	0	49.8279	28.9744
DATA	1617	20	2	66	1	DarkCorner	DarkCorner	479.776	324.763	3.488547e+000	3.477065e+000	59	29	6.697500e+000	0	0	0	0	0	0	-1.237	0	0	49.1849	29.1471
DATA	1618	20	3	66	1	DarkCorner	DarkCorner	505	324.985	3.460414e+000	3.449025e+000	60	30	7.545997e+000	0	0	0	0	0	0	-1.64807	0	0	46.8651	31.9722
DATA	1619	20	4	0	0	A_42_P787775	NM_001127566	530.347	324.611	7.102067e+002	7.110310e+001	714	31.5	8.479840e+000	0	0	0	0	0	0	650.4	1	1	48.2044	31.8
DATA	1620	20	5	0	0	A_42_P607770	NM_001134616	555.795	324.26	1.008570e+004	1.008576e+003	8990.5	30	6.630457e+000	0	0	0	0	0	0	9303.98	1	1	48.5334	29.5
DATA	1621	20	6	0	0	A_42_P484738	NM_022266	581.437	324.479	1.896209e+003	1.896509e+002	1799	28	6.997700e+000	0	0	0	0	0	0	1761.55	1	1	48.2044	28.9697
DATA	1622	20	7	0	0	A_64_P075273	NM_031743	606.809	324.515	3.426907e+002	3.443263e+001	385.5	31	6.741899e+000	0	0	0	0	0	0	320.438	1	1	46.8651	31.1034
DATA	1623	20	8	0	0	A_42_P674050	NM_001107225	632.139	324.722	8.007100e+003	8.007170e+002	7414.5	32	5.867751e+000	0	0	0	0	0	0	7533.29	1	1	47.8731	32.7949
DATA	1624	20	9	1028	1	(+)E1A_r60_a107	E1A_r60_a107	657.582	324.573	2.372428e+001	4.074483e+000	86	33	8.957246e+000	0	0	0	0	0	0	22.449	1	1	57.5363	32.9677
DATA	1625	20	10	0	0	A_64_P144253	NM_201350	683	324.545	4.097920e+001	5.258201e+000	100	33	8.962787e+000	0	0	0	0	0	0	38.9853	1	1	55.8519	33.8235
DATA	1626	20	11	0	0	A_44_P791729	NM_181377	707.648	325.037	8.751878e+003	8.751940e+002	8848.5	33	7.207800e+000	0	0	0	0	0	0	8366.98	1	1	41.8414	33.7857
DATA	1627	20	12	0	0	A_42_P550624	NM_001109319	733.634	324.873	2.770102e+003	2.770294e+002	2691	32	6.965506e+000	0	0	0	0	0	0	2660.8	1	1	47.5395	31.4194
DATA	1628	20	13	0	0	A_43_P11580	NM_012833	759.069	324.507	2.011685e+002	2.037761e+001	250	28	8.283291e+000	0	0	0	0	0	0	194.05	1	1	48.5334	28.7097
DATA	1629	20	14	0	0	A_44_P417055	XM_223442	784.457	324.614	9.360674e+002	9.366269e+001	945	31.5	7.677218e+000	0	0	0	0	0	0	906.479	1	1	47.5395	30.4444
DATA	1630	20	15	0	0	A_64_P142867	A_64_P142867	809.926	324.647	1.149912e+004	1.149917e+003	11225.5	33	7.186635e+000	0	0	0	0	0	0	11175.3	1	1	46.1809	33.0909
DATA	1631	20	16	0	0	A_64_P013002	XM_001072551	835.418	324.573	2.372809e+001	3.995827e+000	85	31	7.950962e+000	0	0	0	0	0	0	23.1337	1	1	57.5363	31.303
DATA	1632	20	17	0	0	A_42_P457692	NM_001008363	860.375	324.778	6.044730e+003	6.044815e+002	5840	31	7.566797e+000	0	0	0	0	0	0	5909.93	1	1	47.8731	33.2222
DATA	1633	20	18	0	0	A_42_P788480	NM_019194	885.696	325.188	7.877425e+003	7.877490e+002	7606	35	1.111596e+001	0	0	0	0	0	0	7721.37	1	1	46.8651	35.7308
DATA	1634	20	19	0	0	A_42_P518462	NM_001007020	911.435	325.232	7.306814e+003	7.306883e+002	7131.5	30	6.099701e+000	0	0	0	0	0	0	7177.89	1	1	46.8651	31.2222
DATA	1635	20	20	0	0	A_64_P007578	NM_001000851	936.831	325.013	1.916020e+001	3.716887e+000	82	31	6.618566e+000	0	0	0	0	0	0	18.8564	1	1	49.1849	31.6552
DATA	1636	20	21	0	0	A_64_P139350	NM_001191727	962.324	324.535	4.726599e+001	5.696921e+000	109	31	7.147501e+000	0	0	0	0	0	0	46.5855	1	1	46.8651	32.6842
DATA	1637	20	22	0	0	A_64_P100442	ENSRNOT00000067861	987.5	325	1.762697e+002	1.791087e+001	231	33	6.982914e+000	0	0	0	0	0	0	173.947	1	1	54.1152	31.7586
DATA	1638	20	23	1028	1	(+)E1A_r60_a135	E1A_r60_a135	1013.09	324.935	7.517766e+000	3.261333e+000	70	30	7.822905e+000	0	0	0	0	0	0	7.42534	1	0	54.4085	30.2581
DATA	1639	20	24	0	0	A_44_P459760	NM_001108187	1038.08	324.815	4.653389e+001	5.631493e+000	109	34	7.093894e+000	0	0	0	0	0	0	45.9879	1	1	45.835	34.36
DATA	1640	20	25	0	0	A_64_P115536	NM_212545	1063.61	324.931	1.213927e+001	3.395164e+000	73.5	30	7.551716e+000	0	0	0	0	0	0	12.0005	1	0	53.8203	31.1818
DATA	1641	20	26	0	0	A_44_P538406	NM_013102	1088.93	324.786	1.656238e+004	1.656241e+003	15740	33	5.105999e+000	0	0	0	0	0	0	16372.9	1	1	46.8651	32.0741
DATA	1642	20	27	0	0	A_64_P120871	NM_198743	1114.44	324.973	8.048354e+002	8.054601e+001	839	30.5	8.211905e+000	0	0	0	0	0	0	795.414	1	1	48.5334	30.6538
DATA	1643	20	28	0	0	A_44_P173048	NM_001009255	1139.64	324.87	1.335906e+003	1.336283e+002	1365	31	7.425979e+000	0	0	0	0	0	0	1319.52	1	1	46.8651	31.625
DATA	1644	20	29	0	0	A_64_P058060	NM_001037541	1165.54	325.212	1.074291e+001	3.352782e+000	73	30	6.839468e+000	0	0	0	0	0	0	10.6025	1	0	40.6843	30.7241
DATA	1645	20	30	0	0	A_64_P145982	NM_001109366	1190.72	325.059	3.115354e+001	4.451388e+000	92.5	33	8.911243e+000	0	0	0	0	0	0	30.7122	1	1	45.835	32.2222
DATA	1646	20	31	0	0	A_42_P514244	NM_012791	1216.5	325	2.042034e+002	2.066707e+001	267	29	1.114377e+001	0	0	0	0	0	0	201.032	1	1	54.1152	31.9394
DATA	1648	20	33	0	0	A_64_P159155	XM_001071429	1266.94	324.857	2.502618e+001	4.058434e+000	86	28	5.414710e+000	0	0	0	0	0	0	24.5525	1	1	46.8651	28.3704
DATA	1649	20	34	0	0	A_64_P030272	ENSRNOT00000041731	1292.09	324.896	1.988288e+002	2.013899e+001	263	29	6.277060e+000	0	0	0	0	0	0	194.664	1	1	46.8651	30.5172
DATA	1650	20	35	0	0	A_42_P733076	NM_001033867	1317.6	325.029	3.027196e+002	3.044157e+001	357.5	29	8.682314e+000	0	0	0	0	0	0	295.695	1	1	46.1809	31.5152
DATA	1651	20	36	0	0	A_44_P349475	NM_031333	1343.09	324.896	1.086729e+003	1.087206e+002	1086	32.5	9.890311e+000	0	0	0	0	0	0	1058.8	1	1	46.8651	34.1944
DATA	1652	20	37	0	0	A_64_P009848	NM_001034135	1368.37	324.957	5.327255e+003	5.327353e+002	5089	31	7.508514e+000	0	0	0	0	0	0	5176.2	1	1	46.8651	32.7222
DATA	1653	20	38	0	0	A_64_P116685	NM_001166763	1394	325	4.756404e+003	4.756514e+002	4735	37	9.765292e+000	0	0	0	0	0	0	4607.82	1	1	46.8651	35.5333
DATA	1654	20	39	0	0	A_64_P072659	NM_001109296	1419.43	324.769	1.867595e+003	1.867877e+002	1901	34	7.405248e+000	0	0	0	0	0	0	1803.51	1	1	45.4864	33.4688
DATA	1655	20	40	0	0	A_42_P808442	NM_001108759	1444.51	324.881	6.870270e+002	6.877984e+001	712.5	31.5	9.617692e+000	0	0	0	0	0	0	661.278	1	1	46.1809	32.5
DATA	1656	20	41	0	0	A_64_P140836	NM_001017486	1469.91	324.896	1.317070e+002	1.357008e+001	186.5	30	8.090924e+000	0	0	0	0	0	0	126.326	1	1	46.8651	32.0345
DATA	1657	20	42	0	0	A_64_P034384	NM_019227	1495.38	325.014	3.085144e+002	3.102531e+001	350.5	28	5.857738e+000	0	0	0	0	0	0	294.823	1	1	48.2044	28.7179
DATA	1658	20	43	0	0	A_42_P730411	NM_001012181	1520.87	325	7.875133e+002	7.882014e+001	790	31	7.316354e+000	0	0	0	0	0	0	749.66	1	1	48.5334	32.0645
DATA	1659	20	44	0	0	A_44_P396450	ENSRNOT00000018433	1546.09	325.104	2.034305e+002	2.060990e+001	251	33	7.589748e+000	0	0	0	0	0	0	192.887	1	1	46.8651	34.1765
DATA	1660	20	45	0	0	A_44_P268610	NM_001109134	1571.5	324.676	4.863079e+003	4.863193e+002	4481	31	6.941383e+000	0	0	0	0	0	0	4591.65	1	1	46.5243	33.129
DATA	1661	20	46	0	0	A_64_P059105	NM_001134544	1597.12	324.657	9.431715e+001	1.000370e+001	150	31	8.786336e+000	0	0	0	0	0	0	88.6684	1	1	45.835	30.5405
DATA	1662	20	47	0	0	A_42_P524851	NM_001130061	1622.09	324.672	1.382224e+003	1.382630e+002	1288.5	34	9.510262e+000	0	0	0	0	0	0	1293.82	1	1	45.1352	34.1515
DATA	1663	20	48	0	0	A_64_P141675	FM127585	1647.51	324.841	4.704130e+003	4.704250e+002	4303	28	8.894683e+000	0	0	0	0	0	0	4383.45	1	1	43.7019	31.3462
DATA	1664	20	49	0	0	A_64_P002979	ENSRNOT00000034762	1673.51	325.304	4.893716e+000	3.414819e+000	64	30	1.137150e+001	0	0	0	0	0	0	4.53883	1	0	46.8651	31.9444
DATA	1665	20	50	0	0	A_44_P175822	NM_001109511	1698.62	325.237	1.262123e+002	1.307000e+001	177	29	7.890340e+000	0	0	0	0	0	0	116.511	1	1	49.1849	29.8667
DATA	1666	20	51	0	0	A_44_P1008751	NM_001137645	1724	325.455	1.787646e+002	1.819912e+001	224	32	8.066228e+000	0	0	0	0	0	0	164.235	1	1	55.8519	31.7241
DATA	1667	20	52	0	0	A_44_P255350	NM_001007674	1749.13	325.3	3.325281e+002	3.342908e+001	365	30.5	7.142505e+000	0	0	0	0	0	0	304.014	1	1	47.2035	31.1
DATA	1668	20	53	0	0	A_64_P017328	NM_012758	1774.58	325.427	5.938919e+002	5.948905e+001	607	29	8.477615e+000	0	0	0	0	0	0	540.277	1	1	57.5363	30.4688
DATA	1669	20	54	0	0	A_64_P132571	NM_001107703	1800	324.774	1.038353e+004	1.038359e+003	9341	30	7.743766e+000	0	0	0	0	0	0	9397.57	1	1	45.4864	30.8182
DATA	1670	20	55	0	0	A_44_P107535	NM_001170336	1825.58	325.427	5.641790e+002	5.652517e+001	579	30.5	8.883356e+000	0	0	0	0	0	0	508.055	1	1	57.5363	32.1071
DATA	1671	20	56	0	0	A_44_P353618	NM_053587	1851	325.455	8.640333e+001	9.321797e+000	136.5	32	7.701686e+000	0	0	0	0	0	0	77.41	1	1	55.8519	33.0857
DATA	1672	20	57	0	0	A_44_P213336	A_44_P213336	1876.65	325.222	3.845780e+002	3.861829e+001	409.5	31	8.165103e+000	0	0	0	0	0	0	342.744	1	1	47.5395	31.9143
DATA	1673	20	58	0	0	A_42_P507072	FQ213070	1901.57	325.392	4.967966e+003	4.968092e+002	4245	31	6.415348e+000	0	0	0	0	0	0	4405.26	1	1	49.1849	31.1852
DATA	1674	20	59	0	0	A_44_P428886	NM_001099516	1927.19	325.531	4.092486e+002	4.107883e+001	424	32	7.493240e+000	0	0	0	0	0	0	361.01	1	1	44.4243	31.5
DATA	1675	20	60	0	0	A_64_P086784	NM_001108657	1952.34	325.442	4.309556e+003	4.309704e+002	3662	34	6.570881e+000	0	0	0	0	0	0	3782.05	1	1	49.8279	33
DATA	1676	20	61	0	0	A_42_P654682	NM_012724	1978	325.455	1.614280e+001	3.936584e+000	74	33.5	7.078027e+000	0	0	0	0	0	0	14.0931	1	0	55.8519	33.4615
DATA	1677	20	62	0	0	A_44_P443008	NM_001013068	2003.53	325.278	6.163031e+002	6.173590e+001	583	31	7.223143e+000	0	0	0	0	0	0	535.253	1	1	48.2044	30.4074
DATA	1678	20	63	0	0	A_64_P027229	A_64_P027229	2028.74	325.269	1.372937e+003	1.373416e+002	1258	32	8.844414e+000	0	0	0	0	0	0	1186.34	1	1	50.1463	31.0968
DATA	1679	20	64	0	0	A_64_P134277	ENSRNOT00000029167	2054.33	325.5	8.425323e+001	9.180342e+000	135	31	7.302911e+000	0	0	0	0	0	0	72.435	1	1	57.5363	30.7586
DATA	1680	20	65	0	0	A_64_P165548	XM_001055860	2079.47	325.356	9.008088e+001	9.724788e+000	134	31	5.946039e+000	0	0	0	0	0	0	77.0599	1	1	48.2044	30.6538
DATA	1681	20	66	0	0	A_64_P014737	NM_001000069	2105	325.455	1.217218e+001	3.878271e+000	72	36	1.447525e+001	0	0	0	0	0	0	10.3613	1	0	55.8519	38.0741
DATA	1682	20	67	0	0	A_42_P627330	NM_001106628	2129.97	325.371	7.571239e+002	7.580275e+001	692	34	9.154780e+000	0	0	0	0	0	0	641.402	1	1	44.0646	34.68
DATA	1683	20	68	0	0	A_64_P039452	NM_001109063	2155.67	325.5	3.240929e+002	3.262184e+001	341	31	5.657650e+000	0	0	0	0	0	0	273.243	1	1	57.5363	30.1351
DATA	1684	20	69	0	0	A_44_P516885	ENSRNOT00000005601	2181.33	325.5	5.342917e+004	5.342918e+003	43066.5	31	8.120096e+000	0	0	0	0	0	0	44834.2	1	1	57.5363	32.6897
DATA	1685	20	70	0	0	A_44_P839176	NM_001107114	2206.57	325.392	2.749159e+003	2.749415e+002	2314	28.5	8.085770e+000	0	0	0	0	0	0	2296.45	1	1	49.1849	29.8824
DATA	1686	20	71	0	0	A_64_P083342	AABR03026150	2231.89	325.5	4.890903e+001	6.174586e+000	98	28	8.496687e+000	0	0	0	0	0	0	40.6763	1	1	56.9804	29.973
DATA	1687	20	72	0	0	A_42_P618185	NM_001108486	2257	325.271	4.120332e+003	4.120506e+002	3347	31	9.304479e+000	0	0	0	1	0	0	3412.11	1	1	46.8651	31.36
DATA	1688	20	73	0	0	A_42_P619957	NM_053830	2282.47	325.456	2.921498e+002	2.946116e+001	299.5	29	6.317751e+000	0	0	0	1	0	0	240.943	1	1	50.4627	28.7742
DATA	1689	20	74	0	0	A_44_P375042	NM_001014243	2307.94	325.389	3.558630e+002	3.579030e+001	353	31	7.404445e+000	0	0	0	0	0	0	292.319	1	1	48.2044	30.3226
DATA	1690	20	75	0	0	A_44_P438053	NM_001004201	2333.28	325.789	1.058927e+002	1.126061e+001	142	31	6.491494e+000	0	0	0	0	0	0	86.6638	1	1	47.2035	30.9143
DATA	1691	20	76	0	0	A_43_P19181	ENSRNOT00000018440	2358.89	325.5	1.109054e+002	1.173787e+001	148.5	28	6.276942e+000	0	0	0	0	0	0	90.4311	1	1	56.9804	28.5
DATA	1692	20	77	0	0	A_42_P664259	NM_024396	2384.42	325.573	4.437887e+004	4.437888e+003	35574.5	32	8.289705e+000	0	0	0	0	0	0	36063.4	1	1	57.5363	31.8276
DATA	1693	20	78	0	0	A_44_P588645	FQ230244	2409.75	325.722	1.155705e+002	1.218760e+001	155	26	6.116484e+000	0	0	0	0	0	0	93.6213	1	1	47.8731	26.8214
DATA	1694	20	79	0	0	A_64_P030844	XM_001065657	2435.11	325.5	4.355338e+001	5.833618e+000	94.5	30	7.919305e+000	0	0	0	0	0	0	35.1759	1	1	56.9804	30.6538
DATA	1695	20	80	0	0	A_64_P054823	A_64_P054823	2460.43	325.605	1.090905e+004	1.090912e+003	8740.5	29	5.351741e+000	0	0	0	0	0	0	8787.12	1	1	49.5074	28.9375
DATA	1696	20	81	0	0	A_42_P516860	XM_001059330	2485.89	325.5	8.009446e+001	8.908977e+000	124	31	8.833062e+000	0	0	0	0	0	0	64.3549	1	1	65	30.6667
DATA	1697	20	82	0	0	A_64_P085772	NM_001191606	2511.06	325.812	1.247663e+002	1.307474e+001	155.5	28	5.488008e+000	0	0	0	0	0	0	100.038	1	1	46.8651	27.7586
DATA	1698	20	83	66	1	DarkCorner	DarkCorner	2536.56	325.988	3.929551e+000	3.917905e+000	58	29	9.349773e+000	0	0	0	0	0	0	0.803493	0	0	50.4627	29.6944
DATA	1699	20	84	66	1	DarkCorner	DarkCorner	2561.48	326.149	3.935628e+000	3.922675e+000	57	23	7.774787e+000	0	0	0	0	0	0	-1.93226	0	0	52.9257	25.2258
DATA	1700	20	85	66	1	DarkCorner	DarkCorner	2587.56	325.805	7.145860e+000	3.992737e+000	64	26	6.890978e+000	0	0	0	0	0	0	5.7019	1	0	51.0895	26.6141
DATA	1701	21	1	66	1	DarkCorner	DarkCorner	441.582	331.573	3.530786e+000	3.535188e+000	64.5	27	7.059229e+000	0	0	0	0	0	0	2.99453	0	0	57.5363	27.1622
DATA	1702	21	2	66	1	DarkCorner	DarkCorner	467.545	331.922	3.499344e+000	3.490391e+000	64	28	8.019626e+000	0	0	0	0	0	0	1.20213	0	0	49.8279	29.4242
DATA	1703	21	3	66	1	DarkCorner	DarkCorner	492.573	332.146	3.470766e+000	3.459343e+000	59	30	5.263431e+000	0	0	0	0	0	0	-2.93176	0	0	49.8279	31.3704
DATA	1704	21	4	0	0	A_44_P277669	NM_001163736	517.574	331.897	6.639299e+002	6.648167e+001	664	30.5	7.554112e+000	0	0	0	0	0	0	606.255	1	1	46.5243	32.2308
DATA	1705	21	5	0	0	A_42_P788480	NM_019194	543.208	331.806	7.935072e+003	7.935145e+002	7250	32	7.562386e+000	0	0	0	0	0	0	7300.69	1	1	47.5395	31.8056
DATA	1706	21	6	0	0	A_42_P558354	NM_001007686	568.4	331.643	3.146733e+003	3.146915e+002	2887.5	27	4.953230e+000	0	0	0	0	0	0	2915.55	1	1	47.2035	26.9655
DATA	1707	21	7	0	0	A_44_P714409	NM_001047907	593.91	331.896	3.921571e+003	3.921715e+002	3645	27	8.486442e+000	0	0	0	0	0	0	3658.12	1	1	46.8651	28.6552
DATA	1708	21	8	0	0	A_42_P604331	NM_001108533	619.5	332	9.636782e+004	9.636782e+003	89774	30	5.609901e+000	0	0	0	0	0	0	90468.2	1	1	54.1152	31.0513
DATA	1709	21	9	0	0	A_64_P139472	NM_173119	644.783	331.916	3.962598e+003	3.962737e+002	3761.5	32	8.066112e+000	0	0	0	0	0	0	3741.98	1	1	49.8279	33.3929
DATA	1710	21	10	0	0	A_42_P711589	NM_022948	669.847	332.097	8.075499e+003	8.075567e+002	7729	31	8.035955e+000	0	0	0	0	0	0	7667.9	1	1	46.8651	32.9189
DATA	1711	21	11	0	0	A_42_P813567	NM_031841	695.5	332	1.009440e+005	1.009440e+004	96214	34.5	8.075862e+000	0	0	0	0	0	0	96349.9	1	1	54.1152	34.4333
DATA	1712	21	12	0	0	A_42_P647505	TC640289	721.071	332.2	3.602147e+003	3.602295e+002	3366.5	32	8.050621e+000	0	0	0	0	0	0	3454.93	1	1	46.8651	32
DATA	1713	21	13	0	0	A_64_P094313	NM_032073	746.347	331.88	9.464153e+002	9.469745e+001	992	35.5	1.019979e+001	0	0	0	0	0	0	911.714	1	1	48.8603	34.4643
DATA	1714	21	14	0	0	A_42_P577421	NM_001106819	771.5	332	5.012017e+002	5.022483e+001	527.5	30	7.761681e+000	0	0	0	0	0	0	484.781	1	1	54.1152	29.8571
DATA	1715	21	15	0	0	A_42_P477311	NM_001013170	797.123	331.963	1.239181e+004	1.239185e+003	12017.5	33	6.614521e+000	0	0	0	0	0	0	12030.8	1	1	49.8279	32.5758
DATA	1716	21	16	0	0	A_42_P630249	NM_031824	822.5	332	2.891515e+003	2.891694e+002	2835.5	35	8.440434e+000	0	0	0	1	0	0	2816.72	1	1	48.5334	34.2813
DATA	1717	21	17	0	0	A_42_P618256	NM_001024759	847.74	331.945	8.092504e+002	8.098861e+001	845.5	29	8.628535e+000	0	0	0	0	0	0	790.677	1	1	47.8731	30.75
DATA	1718	21	18	0	0	A_64_P101584	A_64_P101584	873.284	332.095	4.489523e+002	4.500909e+001	500.5	34	7.754569e+000	0	0	0	0	0	0	439.835	1	1	48.8603	34.7333
DATA	1719	21	19	0	0	A_64_P045461	NM_001106750	898.458	332.014	2.452543e+002	2.473229e+001	305.5	30.5	7.564707e+000	0	0	0	0	0	0	240.829	1	1	48.5334	32.5313
DATA	1720	21	20	0	0	A_64_P056485	ENSRNOT00000033663	923.838	332.103	1.241021e+003	1.241430e+002	1258.5	33	7.500529e+000	0	0	0	0	0	0	1221.09	1	1	46.5243	34.4643
DATA	1721	21	21	0	0	A_64_P013077	A_64_P013077	949.31	331.986	9.408644e+001	9.931615e+000	159.5	31	5.800097e+000	0	0	0	0	0	0	92.7308	1	1	47.2035	31.3125
DATA	1722	21	22	0	0	A_44_P348952	NM_001000368	975	332	3.186412e+000	3.177462e+000	63	31.5	8.528029e+000	0	0	0	0	0	0	0.975457	0	0	54.9904	33
DATA	1723	21	23	0	0	A_64_P147609	NM_001106295	1000.25	332	5.799269e+003	5.799356e+002	5711	30.5	8.303233e+000	0	0	0	0	0	0	5729.59	1	1	49.1849	30.7667
DATA	1724	21	24	0	0	A_44_P193928	NM_183328	1025.38	332	1.450009e+003	1.450355e+002	1479	30.5	9.837448e+000	0	0	0	0	0	0	1433.64	1	1	48.5334	32.8462
DATA	1725	21	25	0	0	A_44_P441947	XM_001079870	1050.63	332	1.197828e+003	1.198247e+002	1271	31.5	7.168420e+000	0	0	0	0	0	0	1184.84	1	1	46.5243	33.1429
DATA	1726	21	26	0	0	A_42_P666259	NM_001009661	1076.28	332.066	1.376550e+004	1.376553e+003	13213.5	29.5	6.801401e+000	0	0	0	0	0	0	13618.4	1	1	49.1849	29.2083
DATA	1727	21	27	0	0	A_64_P082486	A_64_P082486	1101.7	331.971	1.122168e+003	1.122616e+002	1183	31	6.691225e+000	0	0	0	0	0	0	1110.02	1	1	46.1809	31.4286
DATA	1728	21	28	0	0	A_64_P091940	NM_033237	1126.97	332.215	1.436830e+002	1.471384e+001	201.5	31	9.544572e+000	0	0	0	0	0	0	142.072	1	1	45.835	32.0667
DATA	1729	21	29	0	0	A_64_P144899	NM_001107736	1152.29	331.831	7.625119e+002	7.631715e+001	800	29	7.307893e+000	0	0	0	0	0	0	753.415	1	1	45.4864	29.9697
DATA	1730	21	30	0	0	A_44_P410062	XM_224553	1177.92	331.778	3.640760e+002	3.654582e+001	414.5	32	8.348358e+000	0	0	0	0	0	0	359.383	1	1	45.4864	32.8485
DATA	1731	21	31	0	0	A_42_P489764	NM_001004099	1203	331.774	6.441880e+003	6.441958e+002	6204	30	8.510800e+000	0	0	0	0	0	0	6351.21	1	1	45.4864	30.6061
DATA	1732	21	32	0	0	A_42_P640277	NM_001003401	1228.91	332.386	4.223071e+004	4.223073e+003	41583	32	1.202893e+001	0	0	0	0	0	0	41576.7	1	1	57.259	34.8485
DATA	1733	21	33	0	0	A_44_P212850	NM_019305	1254.42	332.427	4.983057e+001	5.916280e+000	113	32	9.114353e+000	0	0	0	0	0	0	48.9745	1	1	57.5363	32
DATA	1734	21	34	0	0	A_64_P125506	NM_021677	1279.58	331.967	3.061368e+002	3.078002e+001	373.5	30	6.917197e+000	0	0	0	0	0	0	300.279	1	1	43.7019	32.619
DATA	1735	21	35	0	0	A_42_P802358	NM_001024341	1304.66	332.122	1.171147e+004	1.171152e+003	11303	32	7.991393e+000	0	0	0	0	0	0	11462.8	1	1	48.8603	33.0645
DATA	1736	21	36	0	0	A_44_P552852	XM_346367	1330.33	332.306	1.788701e+001	3.674905e+000	78	33	1.080471e+001	0	0	0	0	0	0	17.4651	1	1	48.2044	35.6216
DATA	1738	21	38	0	0	A_64_P141187	NM_001108899	1381.42	332.427	1.204809e+001	3.445361e+000	72	35	9.977538e+000	0	0	0	0	0	0	11.6997	1	0	57.5363	35.9143
DATA	1739	21	39	0	0	A_44_P274823	NM_001105831	1406.37	331.735	3.025771e+003	3.025944e+002	2921	37	7.710069e+000	0	0	0	0	0	0	2929.27	1	1	46.5243	35.6129
DATA	1740	21	40	0	0	A_42_P804913	ENSRNOT00000022886	1432	332.455	5.905450e+001	6.739724e+000	119	36	1.012462e+001	0	0	0	0	0	0	56.9906	1	1	55.8519	35.7143
DATA	1741	21	41	0	0	A_64_P113970	NM_212501	1457	332.191	3.491938e+003	3.492090e+002	3307	37	1.152303e+001	0	0	0	0	0	0	3358.5	1	1	46.8651	37.697
DATA	1742	21	42	1028	1	(+)E1A_r60_3	E1A_r60_3	1482.67	332.5	3.222561e+001	4.591559e+000	93	29	6.257687e+000	0	0	0	0	0	0	30.8835	1	1	65	29.5882
DATA	1743	21	43	0	0	A_42_P661992	TC596141	1508.42	332.427	3.628234e+002	3.643059e+001	408	32.5	7.456828e+000	0	0	0	0	0	0	346.39	1	1	57.5363	33.1765
DATA	1744	21	44	0	0	A_42_P577431	NM_001109422	1533.58	332.427	1.214166e+002	1.258106e+001	174	35.5	8.006151e+000	0	0	0	0	0	0	115.469	1	1	57.5363	36.4615
DATA	1745	21	45	0	0	A_44_P524785	NM_001000184	1559	332.455	1.087374e+001	3.483390e+000	71.5	37	7.168708e+000	0	0	0	0	0	0	10.2993	1	0	55.8519	37.0588
DATA	1746	21	46	0	0	A_64_P027634	NM_001000223	1584.32	332.225	5.221508e+001	6.189388e+000	110	33	7.931217e+000	0	0	0	0	0	0	49.2484	1	1	47.5395	33.5143
DATA	1747	21	47	0	0	A_42_P492976	NM_001126099	1609.67	332.5	3.381729e+002	3.398159e+001	369.5	33.5	8.215730e+000	0	0	0	0	0	0	317.597	1	1	57.5363	32.6765
DATA	1748	21	48	0	0	A_64_P157479	AABR03127998	1634.58	332.035	9.196974e+003	9.197035e+002	8516	32	5.815629e+000	0	0	0	0	0	0	8599.19	1	1	42.5954	32.3077
DATA	1749	21	49	0	0	A_44_P391706	NM_001007796	1660.27	332.507	2.190969e+002	2.216700e+001	264	31	9.823065e+000	0	0	0	0	0	0	203.927	1	1	48.8603	32.7241
DATA	1750	21	50	0	0	A_44_P184685	NM_001007735	1685.63	332.836	1.175271e+002	1.222997e+001	169.5	30	6.281388e+000	0	0	0	0	0	0	108.887	1	1	48.5334	29.9259
DATA	1751	21	51	0	0	A_44_P475275	NM_001000893	1711.5	332.5	5.812512e+001	6.733807e+000	115	31	7.238042e+000	0	0	0	0	0	0	53.5887	1	1	57.5363	30.4516
DATA	1752	21	52	0	0	A_44_P270056	NM_001007800	1736.39	332.642	1.579830e+002	1.616338e+001	206	35.5	6.853747e+000	0	0	0	0	0	0	144.966	1	1	45.835	33.5769
DATA	1753	21	53	0	0	A_64_P059351	NM_001145175	1762.11	331.922	1.189171e+002	1.237744e+001	175	31	7.747227e+000	0	0	0	0	0	0	108.564	1	1	45.835	31.3784
DATA	1754	21	54	0	0	A_42_P573441	NM_001105742	1787.38	332.444	7.391935e+003	7.392015e+002	6485.5	31	8.620680e+000	0	0	0	0	0	0	6715.57	1	1	48.2044	32.129
DATA	1755	21	55	0	0	A_42_P485589	NM_017246	1812.46	332.457	1.161221e+002	1.211884e+001	167.5	31.5	7.211103e+000	0	0	0	0	0	0	104.973	1	1	47.8731	32.25
DATA	1756	21	56	0	0	A_44_P149540	XM_223051	1838.06	332.386	1.591386e+004	1.591389e+003	13989.5	31.5	8.500439e+000	0	0	0	0	0	0	14312.2	1	1	47.2035	32.5333
DATA	1757	21	57	0	0	A_44_P323236	NM_001000513	1863.2	332.547	2.264059e+001	4.170865e+000	83	31	8.461141e+000	0	0	0	0	0	0	20.2595	1	1	44.4243	32.5
DATA	1759	21	59	0	0	A_64_P100447	NM_001173469	1914.39	332.896	1.447056e+001	3.823614e+000	72.5	31	6.330093e+000	0	0	0	0	0	0	12.8158	1	0	46.1809	31.4848
DATA	1760	21	60	0	0	A_64_P150008	A_64_P150008	1939.89	332.5	1.062993e+002	1.120955e+001	155	33	9.128605e+000	0	0	0	0	0	0	93.6497	1	1	56.9804	33.4211
DATA	1761	21	61	0	0	A_42_P481696	NM_022508	1965.06	332.389	2.348742e+003	2.349014e+002	2055.5	33	6.779397e+000	0	0	0	0	0	0	2058.65	1	1	48.2044	33.0909
DATA	1762	21	62	0	0	A_64_P033755	AABR03073220	1990.6	332.667	6.846258e+001	7.732515e+000	122	32	7.520331e+000	0	0	0	0	0	0	59.7007	1	1	41.8414	32.6538
DATA	1763	21	63	0	0	A_64_P115980	NM_001109458	2016.32	332.431	3.020666e+002	3.042201e+001	321	31	7.536577e+000	0	0	0	0	0	0	262.036	1	1	48.5334	31
DATA	1764	21	64	0	0	A_64_P001426	NM_001126301	2041.29	332.754	1.664644e+002	1.703788e+001	202	32.5	9.980441e+000	0	0	0	0	0	0	143.696	1	1	45.1352	33.6667
DATA	1765	21	65	0	0	A_64_P012987	NM_001108668	2066.85	332.767	1.852492e+003	1.852852e+002	1583.5	36	8.527332e+000	0	0	0	0	0	0	1591.06	1	1	47.8731	34.6538
DATA	1767	21	67	0	0	A_42_P668289	TC585832	2117.54	332.824	3.521216e+003	3.521409e+002	2903	35	1.414167e+001	0	0	0	0	0	0	2994.77	1	1	48.8603	39.75
DATA	1768	21	68	0	0	A_64_P052690	ENSRNOT00000036634	2142.74	332.778	6.391249e+002	6.401968e+001	590	32.5	6.890969e+000	0	0	0	0	0	0	540.986	1	1	47.5395	30.8214
DATA	1769	21	69	0	0	A_42_P593020	NM_013413	2168.42	332.573	8.079666e+001	8.895290e+000	127	32	6.446548e+000	0	0	0	0	0	0	68.0629	1	1	65	31.1714
DATA	1770	21	70	0	0	A_64_P037303	NM_001127530	2193.58	332.573	9.758080e+002	9.765236e+001	837	28.5	5.001449e+000	0	0	0	0	0	0	818.288	1	1	57.5363	29.3333
DATA	1771	21	71	0	0	A_44_P684180	NM_001037363	2219.14	332.722	5.691100e+003	5.691223e+002	4633.5	29	1.066156e+001	0	0	0	0	0	0	4751.15	1	1	47.8731	31.9143
DATA	1772	21	72	0	0	A_64_P104743	NM_133518	2244.8	332.831	1.538502e+002	1.584043e+001	185.5	28	4.758034e+000	0	0	0	0	0	0	127.882	1	1	47.5395	27.75
DATA	1773	21	73	0	0	A_44_P941132	NM_001108128	2269.63	332.836	7.036420e+003	7.036522e+002	5560	31.5	7.013498e+000	0	0	0	0	0	0	5824.83	1	1	48.5334	30.6786
DATA	1774	21	74	0	0	A_44_P187080	NM_001110823	2295.08	332.816	2.646583e+004	2.646586e+003	20888.5	29	6.656320e+000	0	0	0	0	0	0	21820.2	1	1	48.5334	29.2353
DATA	1775	21	75	0	0	A_42_P574960	ENSRNOT00000068719	2320.65	333.138	7.968486e+002	7.977620e+001	721	30	5.829730e+000	0	0	0	1	0	0	654.472	1	1	45.4864	29.2963
DATA	1776	21	76	0	0	A_64_P094850	A_64_P094850	2346	333.226	6.209425e+001	7.295790e+000	111	30	6.256168e+000	0	0	0	0	0	0	50.8136	1	1	45.4864	30.8378
DATA	1777	21	77	0	0	A_43_P13418	NM_172042	2371.54	332.647	7.254378e+003	7.254480e+002	5878.5	29	6.045395e+000	0	0	0	0	0	0	5914.89	1	1	46.5243	28.7586
DATA	1778	21	78	66	-1	(-)3xSLv1	NegativeControl	2397	332.867	3.869511e+000	3.857063e+000	58	30	8.663482e+000	0	0	0	0	0	0	0.383061	0	0	65	32.4516
DATA	1779	21	79	0	0	A_44_P321594	ENSRNOT00000006966	2422.44	333.032	3.425442e+001	5.167062e+000	86	29	7.447671e+000	0	0	0	0	0	0	27.7554	1	1	44.0646	29.9697
DATA	1780	21	80	0	0	A_44_P792531	NM_001025700	2447.63	333	2.223054e+002	2.256648e+001	239	30	6.649928e+000	0	0	0	0	0	0	179.622	1	1	46.5243	29.3077
DATA	1781	21	81	0	0	A_43_P14795	NM_001044248	2473.24	333	1.252053e+003	1.252657e+002	1039	30	7.105866e+000	0	0	0	0	0	0	1009.03	1	1	46.8651	29.08
DATA	1782	21	82	0	0	A_42_P671502	NM_053467	2498.31	332.986	6.179273e+003	6.179396e+002	5029	29	5.947549e+000	0	0	0	0	0	0	4968.51	1	1	47.2035	29.04
DATA	1783	21	83	66	1	DarkCorner	DarkCorner	2524.12	333.012	3.919297e+000	3.906398e+000	51	29	5.309285e+000	0	0	0	0	0	0	-6.00689	0	0	49.5074	28.5333
DATA	1784	21	84	66	1	DarkCorner	DarkCorner	2549.54	333.114	3.926075e+000	3.913153e+000	51	27	8.101852e+000	0	0	0	0	0	0	-4.69726	0	0	47.8731	25.84
DATA	1785	21	85	66	1	DarkCorner	DarkCorner	2574.72	332.93	3.931905e+000	3.918965e+000	56.5	26	6.712903e+000	0	0	0	0	0	0	-0.651076	0	0	47.2035	26.2162
DATA	1786	22	1	66	1	DarkCorner	DarkCorner	454.208	339.014	3.511780e+000	3.500222e+000	61.5	29	8.053796e+000	0	0	0	0	0	0	-0.660585	0	0	46.8651	28.6667
DATA	1787	22	2	66	1	DarkCorner	DarkCorner	479.683	339.122	3.482017e+000	3.470557e+000	61	29	7.672981e+000	0	0	0	0	0	0	-0.504885	0	0	50.7771	30.4815
DATA	1788	22	3	66	1	DarkCorner	DarkCorner	505.479	339.205	3.453582e+000	3.442216e+000	61	28.5	6.432318e+000	0	0	0	0	0	0	-1.23254	0	0	48.2044	29.9333
DATA	1789	22	4	0	0	A_42_P704824	NM_001009640	530.413	339.067	2.108125e+002	2.135629e+001	255.5	31.5	6.140492e+000	0	0	0	1	0	0	193.412	1	1	49.1849	31.1875
DATA	1790	22	5	0	0	A_42_P517554	NM_001107060	556	339.455	1.522693e+002	1.560003e+001	206	28	7.059805e+000	0	0	0	0	0	0	140.734	1	1	55.8519	28.2162
DATA	1791	22	6	0	0	A_42_P586883	NM_001106416	581.094	338.672	7.060474e+001	7.822971e+000	129.5	26	5.707946e+000	0	0	0	0	0	0	65.6947	1	1	45.1352	26
DATA	1792	22	7	0	0	A_64_P060302	BF559343	606.716	338.905	3.072028e+002	3.090204e+001	350	29.5	7.386166e+000	0	0	0	0	0	0	287.723	1	1	48.8603	30.3438
DATA	1793	22	8	0	0	A_64_P055418	NM_001025641	632.333	339.5	1.222102e+001	3.543389e+000	76	32	6.655910e+000	0	0	0	0	0	0	11.5174	1	0	57.5363	32.3636
DATA	1794	22	9	0	0	A_44_P317600	NM_012612	657.56	339.24	4.826367e+002	4.837685e+001	520	31	8.241079e+000	0	0	0	0	0	0	457.426	1	1	48.8603	32.6538
DATA	1795	22	10	0	0	A_44_P433359	NM_022710	682.893	339.5	3.953293e+002	3.966956e+001	436	34	8.182149e+000	0	0	0	0	0	0	376.69	1	1	56.9804	34.0488
DATA	1796	22	11	0	0	A_42_P788480	NM_019194	708.316	339.395	7.648055e+003	7.648125e+002	7100	32	7.778998e+000	0	0	0	0	0	0	7323.7	1	1	49.5074	32.0263
DATA	1797	22	12	0	0	A_44_P269808	NM_001025281	733.582	339.427	9.929716e+001	1.045065e+001	158.5	34	9.815306e+000	0	0	0	0	0	0	95.5224	1	1	57.5363	33.2667
DATA	1798	22	13	0	0	A_64_P108165	NM_001108889	759.333	339.5	2.086722e+001	3.857504e+000	84	31.5	1.013281e+001	0	0	0	0	0	0	20.1605	1	1	65	32.5882
DATA	1799	22	14	0	0	A_42_P581567	NM_001011899	784.803	339.169	1.591419e+002	1.623905e+001	218	31.5	8.514693e+000	0	0	0	0	0	0	154.346	1	1	47.5395	31.375
DATA	1800	22	15	0	0	A_42_P746029	NM_144748	809.893	339.5	2.794066e+001	4.263661e+000	91	32	7.914296e+000	0	0	0	0	0	0	27.1939	1	1	56.9804	32.5938
DATA	1801	22	16	0	0	A_42_P481087	XM_232226	835.09	338.955	1.346991e+003	1.347374e+002	1326	29	9.139491e+000	0	0	0	0	0	0	1315.06	1	1	46.8651	31.303
DATA	1802	22	17	0	0	A_64_P031020	ENSRNOT00000032728	860.276	339.434	9.122947e+000	3.328859e+000	70	28	8.567494e+000	0	0	0	0	0	0	8.93225	1	0	49.1849	31.1471
DATA	1803	22	18	0	0	A_44_P344228	NM_183051	886.107	339.5	4.405441e+001	5.441029e+000	104.5	30	5.739285e+000	0	0	0	0	0	0	43.2437	1	1	65	31.4242
DATA	1804	22	19	0	0	A_64_P009798	NM_021742	911.927	339.28	5.515797e+000	3.233696e+000	67.5	33	8.821557e+000	0	0	0	0	0	0	5.4261	1	0	50.7771	34.775
DATA	1805	22	20	0	0	A_44_P775747	ENSRNOT00000051510	936.544	339.618	2.012578e+004	2.012581e+003	20220	33	6.413886e+000	0	0	0	0	0	0	19834.5	1	1	47.2035	33.069
DATA	1806	22	21	0	0	A_44_P349475	NM_031333	962	339.271	1.109323e+003	1.109778e+002	1131	30	5.365937e+000	0	0	0	0	0	0	1094.9	1	1	46.8651	29.8286
DATA	1807	22	22	0	0	A_64_P114198	NM_001080153	987.304	339.493	2.264197e+003	2.264420e+002	2214	29.5	6.885944e+000	0	0	0	0	0	0	2237.51	1	1	46.8651	30.9118
DATA	1808	22	23	0	0	A_42_P719060	NM_001108994	1013.11	339.5	3.157499e+003	3.157658e+002	3036.5	31	8.177829e+000	0	0	0	0	0	0	3123.14	1	1	56.9804	31.5758
DATA	1809	22	24	0	0	A_44_P163243	NM_175759	1038.5	339.5	3.177540e+000	3.167082e+000	61	35.5	8.643884e+000	0	0	0	0	0	0	-1.42908	0	0	65	35.8438
DATA	1810	22	25	0	0	A_44_P156864	A_44_P156864	1063.42	339.466	1.171525e+002	1.213555e+001	175	32	7.605693e+000	0	0	0	0	0	0	115.981	1	1	48.8603	30.9286
DATA	1811	22	26	0	0	A_42_P758052	NM_001031645	1088.75	339.342	4.669223e+003	4.669331e+002	4412.5	31.5	7.049710e+000	0	0	0	0	0	0	4622.56	1	1	48.2044	29.9286
DATA	1812	22	27	0	0	A_44_P280659	NM_001100971	1114.58	339.573	8.522121e+001	9.091532e+000	152	31	8.556779e+000	0	0	0	0	0	0	84.3484	1	1	57.5363	33.4615
DATA	1813	22	28	0	0	A_42_P768380	NM_001100158	1139.69	339.338	6.053012e+003	6.053095e+002	5796	32	7.793257e+000	0	0	0	0	0	0	5987.65	1	1	48.5334	32.8788
DATA	1814	22	29	0	0	A_44_P486312	NM_144737	1165.08	339.167	3.269243e+002	3.284589e+001	387	30.5	6.282616e+000	0	0	0	0	0	0	323.126	1	1	46.8651	30.6667
DATA	1815	22	30	0	0	A_64_P005288	XM_575125	1190.49	339.286	8.432297e+001	9.010130e+000	143	32	8.651841e+000	0	0	0	0	0	0	83.2546	1	1	47.2035	31.9189
DATA	1816	22	31	0	0	A_64_P101885	ENSRNOT00000058341	1216.42	339.573	2.207227e+002	2.230002e+001	274.5	27	9.155364e+000	0	0	0	0	0	0	217.636	1	1	57.5363	29.2
DATA	1817	22	32	0	0	A_64_P113645	ENSRNOT00000055538	1241.58	339.573	1.290734e+001	3.435614e+000	74	34	1.081955e+001	0	0	0	0	0	0	12.7069	1	0	65	34.7037
DATA	1818	22	33	0	0	A_42_P588869	NM_001008348	1266.79	339.526	3.014935e+003	3.015104e+002	2884	31.5	6.946512e+000	0	0	0	0	0	0	2962.73	1	1	49.8279	31.2333
DATA	1819	22	34	0	0	A_64_P028027	NM_001000473	1292.42	339.573	3.951064e+001	5.082069e+000	98.5	32.5	8.294669e+000	0	0	0	0	0	0	38.7462	1	1	57.5363	33.1923
DATA	1820	22	35	0	0	A_42_P468805	NM_145721	1317.24	339.605	5.032212e+002	5.042398e+001	561	32.5	9.791321e+000	0	0	0	0	0	0	492.388	1	1	49.1849	34.5313
DATA	1821	22	36	0	0	A_42_P522194	NM_012914	1343	339.729	1.482795e+002	1.517175e+001	207.5	29	6.623030e+000	0	0	0	0	0	0	144.722	1	1	46.8651	29.8824
DATA	1822	22	37	0	0	A_64_P002969	A_64_P002969	1368.58	339.573	1.504107e+001	3.554321e+000	76	30	6.809871e+000	0	0	0	0	0	0	14.6399	1	0	57.5363	30.3214
DATA	1823	22	38	0	0	A_42_P453935	NM_001198580	1393.5	339.5	4.863825e+003	4.863932e+002	4590	36.5	9.104944e+000	0	0	0	0	0	0	4720.54	1	1	46.5243	36.5
DATA	1824	22	39	0	0	A_42_P523551	NM_001014087	1419.34	339.025	3.250758e+000	3.240059e+000	59	32	6.387280e+000	0	0	0	0	0	0	-2.00723	0	0	49.5074	33.2121
DATA	1825	22	40	0	0	A_64_P046076	NM_053952	1444.24	339.5	2.083897e+003	2.084151e+002	1969	40	7.412649e+000	0	0	0	0	0	0	2009.61	1	1	46.5243	40
DATA	1826	22	41	0	0	A_42_P607770	NM_001134616	1469.56	339.603	1.069579e+004	1.069584e+003	9761	31.5	1.173736e+001	0	0	0	0	0	0	10279	1	1	50.1463	34.8529
DATA	1827	22	42	0	0	A_64_P089400	NM_022605	1495.31	339.662	3.475960e+002	3.491341e+001	388	30	7.324461e+000	0	0	0	0	0	0	332.822	1	1	48.5334	31.0909
DATA	1828	22	43	0	0	A_64_P072064	FQ221714	1520.91	339.614	1.049841e+005	1.049841e+004	100197	34	7.263441e+000	0	0	0	0	0	0	100136	1	1	57.259	35.1515
DATA	1829	22	44	0	0	A_42_P555125	NM_012913	1546.22	339.708	8.811409e+003	8.811471e+002	7955	38	1.074021e+001	0	0	0	0	0	0	8371.5	1	1	47.8731	39.2647
DATA	1830	22	45	0	0	A_42_P768776	NM_001108443	1571.33	339.667	5.819944e+003	5.820039e+002	5196.5	35	6.709053e+000	0	0	0	0	0	0	5506.96	1	1	46.8651	35.3704
DATA	1831	22	46	0	0	A_42_P593930	NM_001195606	1597.09	339.935	1.408070e+001	3.612503e+000	77	31.5	6.782330e+000	0	0	0	0	0	0	13.2668	1	0	54.4085	31.25
DATA	1832	22	47	0	0	A_64_P013545	NM_001115046	1622.5	340	2.961530e+002	2.980320e+001	322	31	7.657344e+000	0	0	0	0	0	0	277.821	1	1	54.1152	31.7778
DATA	1833	22	48	0	0	A_42_P548520	NM_001100834	1647.57	339.716	5.510814e+003	5.510916e+002	5011	33	9.128927e+000	0	0	0	0	0	0	5146.64	1	1	46.5243	34.1786
DATA	1834	22	49	0	0	A_42_P692317	NM_001107565	1673	340	1.045272e+003	1.045815e+002	990	32	9.915449e+000	0	0	0	0	0	0	971.759	1	1	46.8651	34.129
DATA	1835	22	50	0	0	A_64_P078303	NM_001106526	1698.26	339.929	3.028330e+001	4.543713e+000	88	29.5	8.007520e+000	0	0	0	0	0	0	28.0222	1	1	46.5243	30.25
DATA	1836	22	51	0	0	A_64_P031771	A_64_P031771	1724.03	340.186	5.508496e+001	6.475259e+000	114	31	5.769836e+000	0	0	0	0	0	0	50.7275	1	1	46.8651	32.5714
DATA	1837	22	52	0	0	A_44_P393929	NM_001039713	1749.06	340.101	1.099589e+002	1.151551e+001	164.5	31	6.844805e+000	0	0	0	0	0	0	100.775	1	1	46.8651	31.5
DATA	1838	22	53	0	0	A_44_P135730	XM_228802	1774.63	339.957	2.077330e+002	2.105575e+001	251	30	9.376910e+000	0	0	0	0	0	0	189.437	1	1	46.8651	31.9333
DATA	1839	22	54	0	0	A_43_P23215	NM_001025737	1800.23	339.958	1.515060e+002	1.553945e+001	198	31	8.030246e+000	0	0	0	0	0	0	137.469	1	1	46.8651	30.8788
DATA	1840	22	55	0	0	A_64_P118427	A_64_P118427	1825.44	339.958	6.834671e+001	7.665947e+000	121.5	29	6.835447e+000	0	0	0	0	0	0	61.7048	1	1	48.2044	29.84
DATA	1841	22	56	0	0	A_64_P075560	NM_001037526	1851	340	2.454477e+001	4.266406e+000	83	26	5.831809e+000	0	0	0	0	0	0	22.0466	1	1	54.9904	28.48
DATA	1842	22	57	0	0	A_64_P150311	NM_177935	1876.2	340.186	4.142899e+001	5.428139e+000	99	31	7.812571e+000	0	0	0	0	0	0	37.0254	1	1	46.1809	31.8684
DATA	1843	22	58	0	0	A_44_P272393	NM_001106892	1901.3	340.057	4.009622e+001	5.338921e+000	95	29	7.527182e+000	0	0	0	0	0	0	35.6522	1	1	46.8651	31.4615
DATA	1844	22	59	0	0	A_44_P421887	NM_001191565	1927	340.205	9.301837e+001	9.953915e+000	144	33	8.216387e+000	0	0	0	0	0	0	82.2821	1	1	46.8651	33.1351
DATA	1845	22	60	0	0	A_64_P045102	A_64_P045102	1952.14	340.109	1.789550e+003	1.789904e+002	1717	33.5	8.665959e+000	0	0	0	0	0	0	1574.94	1	1	45.835	34.2667
DATA	1846	22	61	0	0	A_42_P818546	NM_001191600	1977.92	340	7.366447e+002	7.375143e+001	709.5	34	6.864903e+000	0	0	0	0	0	0	644.926	1	1	46.8651	33.2424
DATA	1847	22	62	0	0	A_42_P777445	ENSRNOT00000012684	2003.28	339.985	5.943688e+001	6.948172e+000	111	31	6.508804e+000	0	0	0	0	0	0	51.7718	1	1	45.835	29.6897
DATA	1848	22	63	0	0	A_64_P111709	NM_001000554	2028.94	340.084	2.302033e+002	2.330274e+001	261	33	9.748058e+000	0	0	0	0	0	0	199.496	1	1	46.8651	33.8966
DATA	1849	22	64	0	0	A_64_P107509	NM_001191874	2054.13	340.078	6.171374e+001	7.162353e+000	114	33	9.195955e+000	0	0	0	0	0	0	53.2158	1	1	45.835	34.9677
DATA	1850	22	65	0	0	A_64_P121836	ENSRNOT00000007828	2079.27	340.219	4.425195e+001	5.738086e+000	97	34.5	8.312204e+000	0	0	0	0	0	0	37.9724	1	1	48.2044	34.4375
DATA	1851	22	66	0	0	A_42_P684281	XR_008784	2105	340	2.154856e+003	2.155169e+002	1817	33	1.257694e+001	0	0	0	0	0	0	1839.84	1	1	54.9904	37.4444
DATA	1852	22	67	0	0	A_64_P060804	ENSRNOT00000000462	2130.5	340	6.118164e+001	7.144269e+000	110	34	1.337572e+001	0	0	0	0	0	0	51.9853	1	1	54.1152	38.92
DATA	1853	22	68	0	0	A_64_P075675	A_64_P075675	2155.71	340.246	3.117502e+002	3.139455e+001	317.5	31	7.814121e+000	0	0	0	0	0	0	263.664	1	1	45.1352	30.1875
DATA	1854	22	69	0	0	A_44_P254973	NM_198051	2181.39	340.069	6.285712e+001	7.305879e+000	112	29	6.378378e+000	0	0	0	0	0	0	52.9115	1	1	53.8203	28.3939
DATA	1855	22	70	0	0	A_42_P492976	NM_001126099	2206.15	339.723	3.244382e+002	3.265871e+001	335	30	9.398283e+000	0	0	0	0	0	0	271.885	1	1	45.835	31.7143
DATA	1856	22	71	0	0	A_42_P619114	NM_001014204	2231.94	339.985	6.922867e+001	7.876546e+000	117	33	1.024572e+001	0	0	0	0	0	0	57.7603	1	1	46.8651	34.2857
DATA	1857	22	72	0	0	A_42_P541625	NM_001126090	2257.13	340.064	2.426866e+004	2.426869e+003	20035	32.5	6.086132e+000	0	0	0	0	0	0	20163.6	1	1	49.1849	32.6786
DATA	1858	22	73	0	0	A_42_P469136	NM_001044288	2282.47	340.069	1.019866e+003	1.020569e+002	890	30	6.666720e+000	0	0	0	1	0	0	843.897	1	1	48.2044	30.6129
DATA	1859	22	74	0	0	A_64_P101480	ENSRNOT00000034261	2308.42	340.427	5.534307e+001	6.715028e+000	102.5	31	6.536883e+000	0	0	0	0	0	0	45.6142	1	1	65	30.2353
DATA	1860	22	75	0	0	A_64_P078554	ENSRNOT00000020079	2333.35	340.348	3.522110e+002	3.542734e+001	355	30	7.129750e+000	0	0	0	0	0	0	289.221	1	1	47.2035	32.2
DATA	1861	22	76	0	0	A_44_P131067	ENSRNOT00000045483	2359	340.455	1.390380e+001	4.075352e+000	69	29	6.011946e+000	0	0	0	0	0	0	11.3764	1	0	55.8519	28.9118
DATA	1862	22	77	0	0	A_64_P055699	ENSRNOT00000010871	2384	339.922	1.441971e+003	1.442483e+002	1223	29	7.912161e+000	0	0	0	0	0	0	1175.8	1	1	46.1809	29.8667
DATA	1863	22	78	0	0	A_64_P117203	NM_001106002	2409.31	340.338	1.485111e+004	1.485116e+003	11878	30	7.429361e+000	0	0	0	0	0	0	12072.9	1	1	48.5334	30.6667
DATA	1864	22	79	0	0	A_44_P357870	NM_031559	2435.11	340.5	3.363195e+002	3.385355e+001	329.5	31	7.276478e+000	0	0	0	1	0	0	272.603	1	1	56.9804	31.1333
DATA	1865	22	80	0	0	A_42_P732101	NM_022624	2460.38	340.237	7.899755e+003	7.899850e+002	6226.5	31	7.803794e+000	0	0	0	0	0	0	6385.61	1	1	49.1849	30.5625
DATA	1866	22	81	0	0	A_64_P155054	XM_001062835	2485.83	340.227	7.224093e+001	8.203536e+000	117	30	8.039173e+000	0	0	0	0	0	0	58.252	1	1	48.5334	29.4643
DATA	1867	22	82	0	0	A_44_P534154	NM_001108852	2511.18	340.479	9.697119e+001	1.045028e+001	134.5	29	7.253842e+000	0	0	0	0	0	0	78.0289	1	1	47.8731	31.2414
DATA	1868	22	83	66	1	DarkCorner	DarkCorner	2536.49	340.803	3.915346e+000	3.902460e+000	53	29	6.815384e+000	0	0	0	0	0	0	-3.02856	0	0	47.8731	29.129
DATA	1869	22	84	66	1	DarkCorner	DarkCorner	2562.52	340.726	3.921823e+000	3.908915e+000	54	24.5	9.282324e+000	0	0	0	0	0	0	-4.13952	0	0	53.2255	26.1923
DATA	1870	22	85	66	1	DarkCorner	DarkCorner	2586.91	340.61	3.926798e+000	3.915029e+000	60	27	7.370665e+000	0	0	0	0	0	0	0.761406	0	0	49.8279	27.531
DATA	1871	23	1	66	1	DarkCorner	DarkCorner	441.241	346.139	1.210615e+001	3.715262e+000	72	27	7.177362e+000	0	0	0	1	0	0	10.8033	1	0	49.8279	27.814
DATA	1872	23	2	66	1	DarkCorner	DarkCorner	467.217	346.373	3.492962e+000	3.481466e+000	60.5	29.5	8.035405e+000	0	0	0	0	0	0	-1.62952	0	0	51.4001	30.0882
DATA	1873	23	3	66	1	DarkCorner	DarkCorner	492.267	346.628	3.464588e+000	3.453185e+000	56	29	7.466146e+000	0	0	0	0	0	0	-4.62341	0	0	52.0157	30.92
DATA	1874	23	4	0	0	A_44_P246268	NM_001106862	517.667	346.5	2.734754e+001	4.383867e+000	89	29	5.886043e+000	0	0	0	0	0	0	25.0185	1	1	57.5363	29.1429
DATA	1875	23	5	0	0	A_64_P028396	ENSRNOT00000051835	543.333	346.5	4.166981e+001	5.378475e+000	102	31	5.001290e+000	0	0	0	0	0	0	38.4087	1	1	57.5363	31.2903
DATA	1876	23	6	0	0	A_64_P020451	XM_219275	568.5	346.5	4.296863e+001	5.465070e+000	103	27	6.123415e+000	0	0	0	0	0	0	39.8832	1	1	57.5363	25.6061
DATA	1878	23	8	0	0	A_64_P106264	ENSRNOT00000029671	619.518	346.643	1.637159e+003	1.637499e+002	1660.5	31.5	5.601313e+000	0	0	0	0	0	0	1539.48	1	1	41.8414	32.2667
DATA	1879	23	9	0	0	A_44_P524805	NM_214832	644.986	346.592	2.940677e+001	4.430433e+000	90	31.5	7.348155e+000	0	0	0	0	0	0	27.8157	1	1	47.8731	32.3462
DATA	1880	23	10	0	0	A_42_P764228	NM_031707	670.111	346.5	5.758085e+003	5.758179e+002	5592.5	34.5	8.550744e+000	0	0	0	0	0	0	5476.25	1	1	47.8731	34.4211
DATA	1881	23	11	0	0	A_44_P533760	NM_182843	695.181	346.694	1.435607e+003	1.435981e+002	1353	29.5	6.595588e+000	0	0	0	0	0	0	1372.31	1	1	47.8731	29.7941
DATA	1882	23	12	0	0	A_42_P524610	NM_001108992	720.87	346.826	2.649637e+003	2.649838e+002	2524	32	8.097666e+000	0	0	0	0	0	0	2545.11	1	1	46.8651	31.5128
DATA	1883	23	13	0	0	A_42_P570756	NM_134345	746.418	346.573	1.131902e+005	1.131902e+004	109416	35.5	1.024990e+001	0	0	0	0	0	0	109205	1	1	57.5363	34.8125
DATA	1884	23	14	0	0	A_44_P362969	NM_053688	771.582	346.573	5.859433e+001	6.693566e+000	119	32	8.769396e+000	0	0	0	0	0	0	56.7585	1	1	57.5363	33.1667
DATA	1885	23	15	0	0	A_44_P308197	NM_001012190	796.937	346.506	3.098624e+003	3.098792e+002	3005.5	31	7.439274e+000	0	0	0	0	0	0	3012.62	1	1	50.4627	30.303
DATA	1886	23	16	0	1	ETG05_36762	ETG05_36762	822.303	346.53	4.948958e+001	5.900582e+000	110	32	9.296566e+000	0	0	0	0	0	0	48.2772	1	1	46.1809	32.6364
DATA	1887	23	17	0	0	A_42_P744033	NM_001100846	847.836	347.224	3.131020e+002	3.147364e+001	353.5	29	1.036622e+001	0	0	0	0	0	0	306.376	1	1	46.1809	32.3
DATA	1888	23	18	0	0	A_42_P726363	NM_031536	873.2	347	3.000820e+001	4.383155e+000	92	31	7.315619e+000	0	0	0	0	0	0	29.4412	1	1	45.4864	32.4194
DATA	1889	23	19	0	0	A_64_P010393	NM_053363	898.382	347.338	4.887435e+003	4.887539e+002	4621.5	33	9.003130e+000	0	0	0	0	0	0	4806.34	1	1	46.5243	34.5278
DATA	1890	23	20	0	0	A_42_P612220	NM_001191711	924.418	346.573	8.940304e+002	8.945962e+001	929	33	7.259040e+000	0	0	0	0	0	0	880.939	1	1	57.5363	33.1282
DATA	1891	23	21	0	0	A_44_P393551	NM_012567	949.582	346.573	3.538855e+004	3.538856e+003	33878	30	5.390733e+000	0	0	0	0	0	0	34928.4	1	1	57.5363	30.32
DATA	1892	23	22	0	0	A_44_P278688	NM_053682	974.754	346.677	2.076497e+003	2.076739e+002	2073	31	6.543227e+000	0	0	0	0	0	0	2052.29	1	1	45.1352	30.7297
DATA	1893	23	23	0	0	A_44_P186989	NM_001000076	1000.42	346.573	1.165160e+001	3.375570e+000	75	32	7.878977e+000	0	0	0	0	0	0	11.528	1	0	57.5363	31.359
DATA	1894	23	24	0	0	A_42_P640277	NM_001003401	1025.58	346.573	4.175449e+004	4.175450e+003	41131.5	36	9.399455e+000	0	0	0	0	0	0	41342.3	1	1	57.5363	36.2759
DATA	1895	23	25	0	0	A_44_P398792	NM_053867	1050.86	347.156	1.250386e+004	1.250390e+003	12289	32	7.126808e+000	0	0	0	0	0	0	12386.7	1	1	45.4864	32.4839
DATA	1896	23	26	0	0	A_64_P052552	ENSRNOT00000056797	1076.5	346.648	1.080679e+002	1.126038e+001	164.5	31.5	7.176903e+000	0	0	0	0	0	0	107.068	1	1	57.5363	30.2143
DATA	1897	23	27	0	0	A_64_P119254	NM_001013202	1101.91	346.614	3.174606e+000	3.164208e+000	63	29.5	7.828063e+000	0	0	0	0	0	0	0.17778	0	0	57.259	30.75
DATA	1898	23	28	0	0	A_64_P159614	NM_053614	1126.8	346.775	3.846956e+003	3.847087e+002	3819	31.5	9.161953e+000	0	0	0	0	0	0	3809.46	1	1	47.2035	33.3
DATA	1899	23	29	0	0	A_42_P814107	NM_001024750	1152.59	346.726	1.719952e+002	1.748875e+001	235	32	6.985917e+000	0	0	0	0	0	0	170.202	1	1	47.8731	32.5
DATA	1900	23	30	0	0	A_64_P150751	NM_212494	1178.13	346.691	4.861277e+002	4.871605e+001	528	32	9.662083e+000	0	0	0	0	0	0	480.605	1	1	45.835	32.7568
DATA	1902	23	32	0	0	A_44_P838888	ENSRNOT00000038829	1228.62	346.692	6.054270e+001	6.838070e+000	122	33	1.162649e+001	0	0	0	0	0	0	59.6981	1	1	45.4864	35.1538
DATA	1903	23	33	0	0	A_43_P12927	NM_053769	1254.23	346.913	2.546365e+002	2.566197e+001	314	34	9.572230e+000	0	0	0	0	0	0	250.663	1	1	46.5243	33.4
DATA	1904	23	34	0	0	A_64_P140806	A_64_P140806	1279.5	347	3.024326e+004	3.024328e+003	29623.5	32.5	7.035542e+000	0	0	0	0	0	0	29714.6	1	1	54.1152	34.1333
DATA	1905	23	35	0	0	A_42_P607026	NM_001106839	1304.93	346.814	7.469507e+003	7.469575e+002	7179.5	37.5	1.025598e+001	0	0	0	0	0	0	7322.97	1	1	46.8651	39
DATA	1906	23	36	0	0	A_44_P272186	NM_001107950	1330.38	347.159	2.623634e+001	4.141694e+000	88	32	8.770968e+000	0	0	0	0	0	0	25.6615	1	1	46.8651	32.6333
DATA	1907	23	37	0	0	A_44_P226658	NM_017046	1355.45	346.761	4.510088e+001	5.537569e+000	105	31	9.384263e+000	0	0	0	0	0	0	43.998	1	1	47.5395	32.4242
DATA	1908	23	38	0	0	A_64_P119279	NM_001108109	1380.74	347	1.658201e+004	1.658204e+003	15913.5	32	8.701016e+000	0	0	0	0	0	0	16132	1	1	44.7812	33.1786
DATA	1909	23	39	0	0	A_44_P1042876	NM_212504	1406.24	347	1.862989e+003	1.863270e+002	1791	33	7.834518e+000	0	0	0	0	0	0	1806.99	1	1	46.8651	35.1176
DATA	1910	23	40	0	0	A_64_P119607	ENSRNOT00000037601	1432.13	346.884	2.212777e+002	2.236403e+001	275	38	9.581436e+000	0	0	0	0	0	0	213.928	1	1	46.8651	37.1176
DATA	1911	23	41	0	0	A_42_P784252	NM_133557	1457.24	347	1.650034e+004	1.650037e+003	15483	38.5	1.126254e+001	0	0	0	0	0	0	15899.5	1	1	46.8651	39.9412
DATA	1912	23	42	0	0	A_44_P1033194	NM_139328	1482.57	347.103	4.223068e+003	4.223194e+002	4082	33	1.236449e+001	0	0	0	0	0	0	4054.99	1	1	46.5243	36.5455
DATA	1913	23	43	0	0	A_42_P800048	NM_207610	1508.24	347	7.299812e+003	7.299885e+002	6857	33	7.823597e+000	0	0	0	0	0	0	6982.98	1	1	46.8651	33.7813
DATA	1914	23	44	0	0	A_43_P11525	NM_012710	1533.5	347	5.724065e+001	6.601863e+000	116	35	6.733706e+000	0	0	0	0	0	0	54.5462	1	1	65	37.303
DATA	1915	23	45	0	0	A_64_P019037	NM_001013886	1559	347	4.883208e+004	4.883209e+003	45029	39.5	9.796261e+000	0	0	0	0	0	0	46346.3	1	1	54.9904	39.0313
DATA	1916	23	46	0	0	A_64_P003378	NM_001024336	1584.29	346.912	2.756366e+002	2.776245e+001	329	35	6.780974e+000	0	0	0	0	0	0	260.522	1	1	45.835	35.1333
DATA	1917	23	47	0	0	A_44_P258855	NM_053431	1609.72	347.03	4.780381e+003	4.780497e+002	4402	30.5	6.733089e+000	0	0	0	0	0	0	4499	1	1	45.835	30.9
DATA	1918	23	48	0	1	ETG09_35454	ETG09_35454	1635.39	347.069	9.336877e+000	3.473229e+000	68	33	5.720553e+000	0	0	0	0	0	0	8.74829	1	0	65	32.5161
DATA	1919	23	49	0	0	A_64_P089677	NM_001105977	1660.5	347	9.597173e+001	1.016848e+001	152	36	1.132589e+001	0	0	0	0	0	0	89.5202	1	1	54.1152	36
DATA	1920	23	50	0	0	A_64_P013609	A_64_P013609	1686	347	6.288675e+000	3.434086e+000	65.5	34	1.037864e+001	0	0	0	0	0	0	5.83877	1	0	54.9904	35.871
DATA	1921	23	51	0	0	A_44_P357470	NM_030849	1711.17	347	8.582017e+002	8.588717e+001	822	31	4.516138e+000	0	0	0	0	0	0	793.09	1	1	46.8651	31.6071
DATA	1922	23	52	0	0	A_44_P404064	ENSRNOT00000015387	1736.34	347.129	1.240711e+003	1.241179e+002	1225	33	3.484250e+000	0	0	0	0	0	0	1141.16	1	1	46.8651	33.16
DATA	1923	23	53	0	0	A_64_P092167	A_64_P092167	1762.28	347.108	3.924452e+001	5.208796e+000	98.5	33	8.132091e+000	0	0	0	0	0	0	35.9164	1	1	48.8603	33.0256
DATA	1924	23	54	0	0	A_42_P463036	ENSRNOT00000038596	1787.32	346.972	4.234237e+003	4.234377e+002	3806	33	8.650863e+000	0	0	0	0	0	0	3856.24	1	1	48.2044	32.8621
DATA	1925	23	55	0	0	A_44_P1003794	NM_012576	1812.81	346.906	1.592758e+003	1.593133e+002	1483	31.5	7.955814e+000	0	0	0	0	0	0	1443.3	1	1	45.835	32.0357
DATA	1926	23	56	0	0	A_64_P099006	BC105831	1838.53	347.194	5.738923e+000	3.523644e+000	65	28.5	6.220563e+000	0	0	0	0	0	0	5.1742	1	0	47.8731	28.8333
DATA	1927	23	57	0	0	A_42_P795467	NM_001108055	1863.53	347.278	4.880397e+002	4.892888e+001	497.5	27	6.141726e+000	0	0	0	1	0	0	437.83	1	1	48.2044	27.4815
DATA	1928	23	58	0	0	A_42_P629321	NM_031590	1889.42	347.427	1.966295e+002	1.997414e+001	236	29.5	6.694683e+000	0	0	0	0	0	0	175.49	1	1	65	30.3214
DATA	1929	23	59	0	0	A_42_P549786	NM_022609	1913.94	347.464	4.872479e+003	4.872607e+002	4167	33.5	8.081984e+000	0	0	0	0	0	0	4327.26	1	1	47.5395	32.9615
DATA	1930	23	60	0	0	A_64_P006354	ENSRNOT00000043959	1940	347.455	5.714852e+001	6.726652e+000	109	32	8.999333e+000	0	0	0	0	0	0	50.488	1	1	55.8519	32.8919
DATA	1931	23	61	0	0	A_64_P057109	A_64_P057109	1964.78	346.908	1.518179e+003	1.518598e+002	1380	33.5	7.306781e+000	0	0	0	0	0	0	1334.43	1	1	45.835	34.5526
DATA	1932	23	62	0	0	A_44_P101361	NM_032070	1990.58	347.427	3.218428e+001	4.817168e+000	89.5	31	9.012307e+000	0	0	0	0	0	0	28.1457	1	1	65	31.6897
DATA	1933	23	63	0	0	A_64_P103354	ENSRNOT00000066893	2016.11	347.5	7.863157e+002	7.871405e+001	737.5	32.5	9.531305e+000	0	0	0	0	0	0	684.166	1	1	56.9804	34.8438
DATA	1934	23	64	0	0	A_42_P746868	NM_001127580	2041.42	347.427	3.261695e+004	3.261697e+003	27272.5	33.5	8.914468e+000	0	0	0	0	0	0	28237.6	1	1	57.5363	35.875
DATA	1935	23	65	0	0	A_42_P707838	NM_012979	2066.44	347.532	2.848173e+003	2.848405e+002	2330	35	1.363796e+001	0	0	0	0	0	0	2453.75	1	1	49.8279	34.9231
DATA	1936	23	66	0	0	A_42_P628098	NM_001107991	2092.13	347.377	1.504759e+003	1.505203e+002	1326	33	9.039731e+000	0	0	0	0	0	0	1289.91	1	1	46.8651	34.6563
DATA	1937	23	67	0	0	A_64_P028071	ENSRNOT00000042928	2117.58	347.427	2.768637e+005	2.768637e+004	234442	40	2.049015e+001	0	0	0	0	0	0	236188	1	1	57.5363	46
DATA	1938	23	68	0	0	A_64_P002944	A_64_P002944	2143.32	347.671	8.761979e+003	8.762056e+002	7635	34.5	7.653757e+000	0	0	0	0	0	0	7439.15	1	1	49.5074	33.5
DATA	1939	23	69	0	0	A_64_P072159	XM_574060	2168.5	347.5	2.848837e+001	4.676879e+000	81	30	6.892569e+000	0	0	0	0	0	0	24.0751	1	1	57.5363	29.2162
DATA	1940	23	70	0	0	A_64_P052365	NM_001109318	2193.89	347.381	2.614340e+002	2.640759e+001	284.5	29	6.584320e+000	0	0	0	0	0	0	219.925	1	1	44.7812	29.7407
DATA	1941	23	71	0	0	A_64_P023150	ENSRNOT00000042777	2219.42	347.427	1.340391e+002	1.391663e+001	175	30	1.028477e+001	0	0	0	0	0	0	112.257	1	1	57.5363	33.4
DATA	1942	23	72	0	0	A_44_P374902	NM_133429	2244.68	347.176	3.724623e+002	3.743543e+001	371	30	8.405835e+000	0	0	0	0	0	0	310.589	1	1	46.1809	31.5161
DATA	1943	23	73	0	0	A_44_P163271	NM_198733	2270.11	347.5	1.395552e+001	4.024064e+000	71	32	8.156611e+000	0	0	0	0	0	0	11.5897	1	0	65	32.0303
DATA	1944	23	74	0	0	A_42_P548520	NM_001100834	2295.51	347.427	5.511310e+003	5.511441e+002	4602.5	30	6.652094e+000	0	0	0	0	0	0	4558.68	1	1	49.1849	29.5789
DATA	1945	23	75	0	0	A_64_P012154	XM_225935	2320.8	347.478	3.409276e+001	5.108148e+000	87	29	4.724670e+000	0	0	0	0	0	0	28.0928	1	1	47.2035	28.6818
DATA	1946	23	76	0	0	A_64_P033574	NM_001000606	2345.82	347.548	6.309558e+000	3.869383e+000	63	30	7.645147e+000	0	0	0	0	0	0	5.18055	1	0	43.3362	31.6552
DATA	1947	23	77	0	0	A_64_P027764	NM_022685	2371.65	347.638	1.589070e+002	1.634596e+001	187	29	7.619627e+000	0	0	0	0	0	0	130.018	1	1	47.5395	29.9394
DATA	1948	23	78	0	0	A_42_P484738	NM_022266	2397.12	347.627	1.841633e+003	1.842034e+002	1553	28.5	8.694233e+000	0	0	0	0	0	0	1501.92	1	1	48.8603	29.1944
DATA	1949	23	79	0	0	A_64_P036355	NM_053311	2422.25	347.644	1.319931e+004	1.319936e+003	10831	31	6.450999e+000	0	0	0	0	0	0	10732.3	1	1	48.5334	32
DATA	1950	23	80	0	0	A_42_P694928	NM_001109046	2447.56	347.479	2.577107e+002	2.605942e+001	258.5	30	7.390054e+000	0	0	0	0	0	0	208.952	1	1	48.2044	29.7097
DATA	1951	23	81	0	0	A_42_P588738	NM_133542	2473.33	347.5	8.629833e+001	9.460278e+000	130	30	7.430539e+000	0	0	0	1	0	0	69.79	1	1	57.5363	29.7097
DATA	1952	23	82	0	0	A_64_P141254	XM_001060542	2498.5	347.5	2.824416e+001	4.802980e+000	79.5	30	6.423135e+000	0	0	0	0	0	0	22.7894	1	1	57.5363	30.44
DATA	1953	23	83	0	0	A_42_P546054	NM_001013873	2523.73	347.805	2.726824e+002	2.754463e+001	272	29	7.387257e+000	0	0	0	1	0	0	219.593	1	1	49.5074	29.5938
DATA	1954	23	84	66	1	DarkCorner	DarkCorner	2549.88	347.75	3.912176e+000	3.899300e+000	57.5	29	7.661489e+000	0	0	0	0	0	0	-0.787087	0	0	49.1849	28.4286
DATA	1955	23	85	66	1	DarkCorner	DarkCorner	2574.72	347.707	3.917714e+000	3.904927e+000	57	30.5	7.778243e+000	0	0	0	0	0	0	0.232511	0	0	49.1849	30.3182
DATA	1956	24	1	66	1	DarkCorner	DarkCorner	454.5	354	3.504315e+000	3.507634e+000	65	29	7.549807e+000	0	0	0	0	0	0	2.89366	0	0	54.1152	28.98
DATA	1957	24	2	66	1	DarkCorner	DarkCorner	479.716	354.075	3.475164e+000	3.463727e+000	56	30.5	8.808890e+000	0	0	0	0	0	0	-6.53977	0	0	45.835	30.7
DATA	1958	24	3	0	0	A_64_P000371	NM_017308	505.076	354.015	1.313442e+003	1.313891e+002	1262	27	5.601488e+000	0	0	0	0	0	0	1198.12	1	1	46.8651	27.72
DATA	1959	24	4	0	0	A_42_P772356	NM_001191597	530.571	353.9	6.730129e+003	6.730215e+002	6192.5	30	5.050460e+000	0	0	0	0	0	0	6186.21	1	1	47.5395	29.5833
DATA	1961	24	6	0	0	A_42_P470757	NM_001004075	581.271	353.7	5.301215e+003	5.301322e+002	4942	26.5	8.112629e+000	0	0	0	0	0	0	4941.42	1	1	46.8651	28.119
DATA	1962	24	7	0	0	A_64_P034250	ENSRNOT00000041464	606.688	353.609	6.570413e+001	7.371134e+000	123	32	7.209015e+000	0	0	0	0	0	0	61.6401	1	1	44.7812	31.6452
DATA	1963	24	8	0	0	A_64_P065063	NM_012954	632.5	354	9.754552e+001	1.030423e+001	157	31	6.056242e+000	0	0	0	0	0	0	92.0808	1	1	65	32.2963
DATA	1964	24	9	0	0	A_64_P088866	ENSRNOT00000049194	657.438	354.027	4.420463e+002	4.432779e+001	491	34	8.031604e+000	0	0	0	0	0	0	419.616	1	1	48.5334	34.44
DATA	1965	24	10	0	0	A_44_P111759	NM_001000956	683	354	3.430549e+000	3.302335e+000	65	31	7.525585e+000	0	0	0	0	0	0	3.2739	1	0	54.9904	30.4737
DATA	1966	24	11	0	0	A_64_P045019	ENSRNOT00000032417	708	354	1.572857e+003	1.573196e+002	1598	30	7.434511e+000	0	0	0	0	0	0	1508.35	1	1	46.8651	29.3171
DATA	1967	24	12	0	0	A_64_P138989	XM_001053562	733.5	354	9.382633e+001	9.930731e+000	153	29	6.739619e+000	0	0	0	0	0	0	90.3927	1	1	54.1152	30.1765
DATA	1968	24	13	0	0	A_42_P537715	NM_001025743	758.806	354.042	2.952861e+003	2.953038e+002	2834	36	9.526646e+000	0	0	0	0	0	0	2856.79	1	1	46.8651	35.0968
DATA	1969	24	14	0	0	A_42_P453171	NM_001107063	784.321	354	1.575585e+003	1.575916e+002	1542	30.5	7.756977e+000	0	0	0	0	0	0	1530.24	1	1	49.1849	31.2105
DATA	1971	24	16	0	0	A_64_P096157	ENSRNOT00000059486	835.5	354	1.828892e+002	1.856775e+001	236.5	29	9.123313e+000	0	0	0	0	0	0	178.825	1	1	54.1152	31.7879
DATA	1972	24	17	0	0	A_43_P10076	NM_031665	860.373	354.307	1.185849e+004	1.185854e+003	11223	31.5	1.044784e+001	0	0	0	0	0	0	11627.4	1	1	47.8731	34.75
DATA	1974	24	19	0	0	A_42_P772878	NM_001011936	911.071	354.214	3.107413e+003	3.107576e+002	3056.5	33	7.816813e+000	0	0	0	0	0	0	3061.06	1	1	46.8651	33.7308
DATA	1976	24	21	0	0	A_44_P447394	NM_019193	961.831	353.677	6.513928e+003	6.514005e+002	6356	30	6.188251e+000	0	0	0	0	0	0	6438.09	1	1	45.4864	29.6389
DATA	1977	24	22	0	0	A_42_P504250	NM_001134987	987.063	353.825	1.195469e+003	1.195889e+002	1249	31.5	7.755327e+000	0	0	0	0	0	0	1183	1	1	45.4864	31.7368
DATA	1978	24	23	0	0	A_42_P675802	NM_145777	1013.09	354.386	2.468490e+003	2.468692e+002	2462	33	7.937849e+000	0	0	0	0	0	0	2445.15	1	1	57.259	33.2051
DATA	1979	24	24	0	0	A_64_P111843	XM_001074913	1037.89	354	1.231116e+003	1.231522e+002	1249.5	36	8.338430e+000	0	0	0	0	0	0	1220.15	1	1	46.1809	36
DATA	1980	24	25	0	0	A_44_P118724	NM_019361	1063.5	354	1.026009e+004	1.026014e+003	9901.5	32	7.283188e+000	0	0	0	0	0	0	10172	1	1	48.5334	32.3
DATA	1981	24	26	0	0	A_43_P21749	NM_001108329	1089.17	354.043	5.333480e+001	6.200104e+000	114	30	6.565249e+000	0	0	0	0	0	0	52.8786	1	1	46.8651	30.4412
DATA	1982	24	27	0	0	A_43_P11879	NM_017250	1114.98	353.85	4.908122e+001	5.838710e+000	112	30	8.256383e+000	0	0	0	0	0	0	48.6478	1	1	44.7812	31.3158
DATA	1983	24	28	0	0	A_64_P023182	NM_001000033	1139.82	354.169	2.062716e+001	3.776954e+000	80.5	33	7.816918e+000	0	0	0	0	0	0	20.4351	1	1	45.835	34.1143
DATA	1985	24	30	0	0	A_44_P368461	NM_001107085	1191.03	354.055	2.200396e+001	3.858758e+000	82	31	1.128429e+001	0	0	0	0	0	0	21.7582	1	1	46.8651	33.0909
DATA	1986	24	31	0	0	A_64_P097257	A_64_P097257	1216.42	354.427	9.360958e+001	9.884403e+000	154	28	9.869988e+000	0	0	0	0	0	0	92.4461	1	1	65	30
DATA	1987	24	32	0	0	A_64_P100634	NM_001100171	1241.58	354.427	3.539791e+002	3.554036e+001	411	34	8.642356e+000	0	0	0	0	0	0	349.041	1	1	57.5363	34.0968
DATA	1988	24	33	0	0	A_64_P041902	NM_001025653	1267	354.455	3.837633e+003	3.837766e+002	3715	34	9.857357e+000	0	0	0	0	0	0	3777.31	1	1	55.8519	33.8966
DATA	1990	24	35	0	0	A_64_P116171	NM_001004266	1317.58	354.427	1.560114e+002	1.592557e+001	217	35	9.386297e+000	0	0	0	0	0	0	152.906	1	1	57.5363	35.1111
DATA	1991	24	36	0	0	A_44_P243279	NM_001134780	1343	354.422	3.563140e+002	3.577535e+001	414	32	7.594516e+000	0	0	0	0	0	0	348.36	1	1	44.0646	32.48
DATA	1992	24	37	0	0	A_64_P151468	XM_001062494	1368.5	354.5	2.020434e+001	3.796861e+000	82.5	28	5.770788e+000	0	0	0	0	0	0	19.7005	1	1	57.5363	28.9259
DATA	1993	24	38	0	0	A_64_P075769	ENSRNOT00000043984	1393.71	353.881	3.530772e+003	3.530919e+002	3659	33	8.515111e+000	0	0	0	0	0	0	3432.64	1	1	43.7019	34.7407
DATA	1994	24	39	0	0	A_42_P508921	NM_031703	1419.42	354.427	8.986741e+000	3.356468e+000	70.5	34	8.555682e+000	0	0	0	0	0	0	8.71042	1	0	57.5363	35.4595
DATA	1995	24	40	0	0	A_44_P503376	NM_001000274	1444.58	354.427	7.148217e+000	3.322196e+000	67.5	39	9.894025e+000	0	0	0	0	0	0	6.90609	1	0	57.5363	38.7407
DATA	1996	24	41	0	0	A_64_P093088	NM_001000816	1470.33	354.5	4.001744e+001	5.158817e+000	100	39	1.242768e+001	0	0	0	0	0	0	38.5279	1	1	57.5363	40.3667
DATA	1997	24	42	0	0	A_44_P489608	NM_023967	1495.5	354.5	1.536885e+002	1.571232e+001	206	30	8.522970e+000	0	0	0	0	0	0	147.44	1	1	57.5363	31.8889
DATA	1998	24	43	0	0	A_44_P213088	ENSRNOT00000037507	1520.89	354.5	4.036130e+001	5.200625e+000	100	38	9.420020e+000	0	0	0	0	0	0	38.5748	1	1	65	38.7667
DATA	1999	24	44	0	0	A_64_P060725	NM_001025278	1546.42	354.427	1.474572e+001	3.607740e+000	74	35	8.160817e+000	0	0	0	0	0	0	14.0375	1	0	57.5363	36.6471
DATA	2000	24	45	0	0	A_44_P384698	XM_216321	1571.33	354.182	2.310662e+003	2.310899e+002	2348.5	39	7.759870e+000	0	0	0	0	0	0	2190.86	1	1	45.4864	36.2917
DATA	2001	24	46	0	0	A_42_P696084	NM_031022	1596.63	353.867	2.642864e+003	2.643073e+002	2625.5	33	6.794847e+000	0	0	0	0	0	0	2495.28	1	1	43.7019	33.2069
DATA	2002	24	47	0	0	A_64_P014918	NM_001108246	1622.14	354.232	1.242169e+003	1.242616e+002	1176	31	6.033847e+000	0	0	0	0	0	0	1167.78	1	1	46.1809	31.3235
DATA	2003	24	48	0	0	A_64_P032690	ENSRNOT00000049975	1647.89	354.5	8.029365e+004	8.029365e+003	75143	34	7.606410e+000	0	0	0	0	0	0	75149.3	1	1	56.9804	34.2667
DATA	2004	24	49	0	0	A_42_P481516	NM_134364	1672.99	354.817	4.439814e+003	4.439941e+002	4052.5	35	7.982670e+000	0	0	0	0	0	0	4136.93	1	1	46.8651	35.1389
DATA	2005	24	50	0	0	A_64_P166158	ENSRNOT00000013694	1698.58	354.573	1.665368e+002	1.699319e+001	217	30	5.266439e+000	0	0	0	0	0	0	154.445	1	1	65	30.8462
DATA	2006	24	51	0	0	A_64_P140338	A_64_P140338	1724.11	354.5	3.407260e+000	3.396046e+000	60	31	4.146082e+000	0	0	0	0	0	0	-1.26921	0	0	56.9804	32.76
DATA	2007	24	52	0	1	ERCC-00062_278	ERCC-00062_278	1749.48	354.629	1.967999e+002	1.997364e+001	247.5	31	7.299526e+000	0	0	0	0	0	0	180.775	1	1	44.4243	32.5263
DATA	2008	24	53	0	0	A_64_P110838	NM_001013175	1774.67	354.671	2.706799e+002	2.728431e+001	314.5	30.5	6.674103e+000	0	0	0	0	0	0	247.44	1	1	48.2044	30.8929
DATA	2009	24	54	0	0	A_42_P802358	NM_001024341	1799.88	354.603	1.149289e+004	1.149294e+003	9966.5	31	9.637561e+000	0	0	0	0	0	0	10454.6	1	1	48.5334	32.5152
DATA	2010	24	55	0	0	A_64_P010421	A_64_P010421	1825.32	354.722	5.503743e+001	6.502581e+000	111	28.5	5.890280e+000	0	0	0	0	0	0	49.8164	1	1	48.2044	29.1667
DATA	2011	24	56	0	0	A_43_P13320	NM_138880	1851	354.545	1.316859e+001	3.721548e+000	71	24	4.477121e+000	0	0	0	0	0	0	11.8585	1	0	55.8519	24.7308
DATA	2012	24	57	0	0	A_42_P800916	NM_022403	1876.48	354.731	4.292230e+001	5.537323e+000	95	28	7.939163e+000	0	0	0	0	0	0	38.4576	1	1	46.5243	30.303
DATA	2013	24	58	0	0	A_42_P554610	XM_001064863	1901.57	354.843	1.315055e+004	1.315060e+003	11155	29.5	6.076043e+000	0	0	0	0	0	0	11723.9	1	1	47.5395	31.7222
DATA	2014	24	59	0	0	A_42_P476353	NM_001012113	1926.72	355.029	1.018189e+004	1.018195e+003	8643	30	6.542585e+000	0	0	0	0	0	0	9031.92	1	1	46.1809	30.3448
DATA	2015	24	60	0	0	A_43_P12234	NM_022516	1952.44	354.647	2.492662e+003	2.492915e+002	2166	33	7.798099e+000	0	0	0	0	0	0	2199.61	1	1	46.8651	35.5
DATA	2016	24	61	0	0	A_64_P048315	ENSRNOT00000044039	1978.22	354.11	2.826594e+002	2.849060e+001	306	33	7.660045e+000	0	0	0	0	0	0	248.12	1	1	47.8731	32.875
DATA	2017	24	62	0	0	A_44_P477047	NM_171983	2003.42	354.573	6.949841e+004	6.949842e+003	60103	34.5	9.387685e+000	0	0	0	0	0	0	60706.1	1	1	57.5363	34.7083
DATA	2018	24	63	0	0	A_43_P11871	NM_017230	2028.58	354.573	9.034222e+001	9.727440e+000	135	32	1.029010e+001	0	0	0	0	0	0	78.5212	1	1	65	34.7188
DATA	2019	24	64	0	0	A_64_P060608	XM_001068783	2054.42	354.573	4.098615e+001	5.471470e+000	97	33	8.015860e+000	0	0	0	0	0	0	35.4433	1	1	65	33.4412
DATA	2020	24	65	0	0	A_64_P115811	NM_001008516	2079.5	354.648	3.636709e+001	5.147035e+000	92	33	7.731866e+000	0	0	0	0	0	0	31.2968	1	1	57.5363	33.1786
DATA	2021	24	66	0	0	A_44_P131296	ENSRNOT00000039892	2105	354.545	4.501000e+001	5.801369e+000	99	36	1.062564e+001	0	0	0	0	0	0	38.5455	1	1	55.8519	39.5143
DATA	2022	24	67	0	0	A_44_P668388	NM_001109245	2130.42	354.573	3.603896e+002	3.622612e+001	376	37	1.989015e+001	0	0	0	0	0	0	307.159	1	1	57.5363	43.7586
DATA	2023	24	68	0	0	A_64_P069729	NM_019189	2155.58	354.573	8.162057e+001	8.959402e+000	129	30.5	6.956569e+000	0	0	0	0	0	0	69.2426	1	1	57.5363	31.0769
DATA	2024	24	69	1028	1	(+)E1A_r60_1	E1A_r60_1	2181.39	354.931	3.724053e+000	3.717951e+000	62.5	29	7.135539e+000	0	0	0	0	0	0	1.80578	0	0	53.8203	29.027
DATA	2025	24	70	0	0	A_64_P165441	NM_001109059	2206.9	354.333	4.674922e+001	5.979986e+000	98	31	9.371887e+000	0	0	0	0	0	0	39.2962	1	1	46.5243	31.9677
DATA	2026	24	71	0	0	A_44_P1034910	NM_201562	2231.67	354.667	3.038133e+003	3.038364e+002	2584	30	9.142910e+000	0	0	0	0	0	0	2543.16	1	1	46.8651	33.303
DATA	2027	24	72	0	0	A_42_P631818	NM_030854	2257.07	354.8	6.286102e+002	6.297339e+001	564	33	8.965574e+000	0	0	0	0	0	0	524	1	1	46.8651	32.0286
DATA	2028	24	73	0	0	A_64_P095620	ENSRNOT00000031258	2282.7	354.9	4.801727e+001	6.108343e+000	98.5	30	6.806069e+000	0	0	0	0	0	0	39.8636	1	1	47.2035	29.5
DATA	2029	24	74	0	0	A_42_P726573	NM_053838	2307.93	354.786	1.309615e+003	1.310164e+002	1150	29	6.642159e+000	0	0	0	0	0	0	1083	1	1	46.8651	28.4194
DATA	2030	24	75	0	0	A_64_P029142	NM_001107866	2333.46	354.903	6.552702e+001	7.577074e+000	115	28	7.134891e+000	0	0	0	0	0	0	53.9872	1	1	48.2044	30.64
DATA	2031	24	76	0	0	A_43_P22902	NM_001106874	2358.69	355.093	5.593751e+000	3.858491e+000	64	30	7.019852e+000	0	0	0	0	0	0	4.59267	1	0	48.8603	30.2759
DATA	2032	24	77	0	0	A_42_P619008	NM_001013079	2384.09	354.896	5.095033e+003	5.095177e+002	4109	30	8.728125e+000	0	0	0	1	0	0	4169.06	1	1	46.8651	28.8611
DATA	2033	24	78	0	0	A_64_P054421	A_64_P054421	2409.49	354.971	2.097981e+001	4.378043e+000	74	29	6.604796e+000	0	0	0	0	0	0	17.1136	1	1	47.2035	28.04
DATA	2034	24	79	0	0	A_42_P627330	NM_001106628	2434.91	354.806	7.258460e+002	7.268684e+001	656	31	7.502083e+000	0	0	0	0	0	0	590.342	1	1	46.1809	31.0938
DATA	2035	24	80	0	0	A_64_P049613	A_64_P049613	2460.5	355	3.793501e+001	5.415010e+000	86	29	7.025372e+000	0	0	0	0	0	0	30.7718	1	1	65	28.7568
DATA	2036	24	81	0	0	A_42_P708614	NM_001130505	2485.61	354.931	4.851176e+004	4.851177e+003	38179	30	7.007561e+000	0	0	0	1	0	0	39256.8	1	1	53.8203	30.9655
DATA	2037	24	82	0	0	A_42_P660068	NM_031350	2511.24	355	2.837687e+003	2.837952e+002	2283	32	7.521308e+000	0	0	0	0	0	0	2291.37	1	1	46.8651	31.1515
DATA	2038	24	83	66	1	DarkCorner	DarkCorner	2536.88	354.942	3.902059e+000	3.889217e+000	58	32	8.315511e+000	0	0	0	0	0	0	-0.468485	0	0	46.8651	31.9091
DATA	2039	24	84	66	1	DarkCorner	DarkCorner	2561.87	354.987	3.908096e+000	3.895233e+000	56	31	8.334440e+000	0	0	0	0	0	0	-3.1579	0	0	48.2044	31.8974
DATA	2040	24	85	66	1	DarkCorner	DarkCorner	2587.92	354.753	3.913438e+000	3.916212e+000	59	27	7.455482e+000	0	0	0	0	0	0	2.81102	0	0	48.5334	27.4307
DATA	2041	25	1	66	1	DarkCorner	DarkCorner	441.238	361.163	3.516849e+000	3.506470e+000	64	28	7.330912e+000	0	0	0	0	0	0	0.81876	0	0	49.5074	28.867
DATA	2042	25	2	66	1	DarkCorner	DarkCorner	466.833	361.212	3.486550e+000	3.475075e+000	61	27	7.455689e+000	0	0	0	0	0	0	-0.0192646	0	0	45.835	27.8889
DATA	2043	25	3	0	0	A_64_P106975	A_64_P106975	492.441	361.147	2.227032e+002	2.253544e+001	266	30	8.500377e+000	0	0	0	0	0	0	202.537	1	1	46.8651	30.7778
DATA	2044	25	4	0	0	A_42_P799702	NM_145093	517.726	361.219	5.121897e+002	5.133302e+001	523	30	5.703980e+000	0	0	0	1	0	0	469.436	1	1	48.2044	28.8462
DATA	2045	25	5	0	0	A_42_P704429	NM_053428	543.418	361.427	3.417526e+004	3.417528e+003	30280	31	6.061264e+000	0	0	0	0	0	0	31558.2	1	1	57.5363	29.8966
DATA	2046	25	6	0	0	A_64_P129730	NM_001033896	568.582	361.427	1.870242e+002	1.900379e+001	236	30.5	6.945641e+000	0	0	0	0	0	0	173.903	1	1	57.5363	30.625
DATA	2047	25	7	0	0	A_64_P156308	NM_001008284	594.088	361.386	9.107489e+002	9.113643e+001	896.5	32.5	8.840132e+000	0	0	0	0	0	0	852.485	1	1	57.259	31.5263
DATA	2048	25	8	0	0	A_44_P152029	A_44_P152029	619.5	361.352	2.037424e+001	3.902088e+000	82	32.5	6.892024e+000	0	0	0	0	0	0	19.1899	1	1	57.5363	32.5
DATA	2049	25	9	0	0	A_42_P751152	NM_001106360	644.582	361.427	5.401810e+004	5.401811e+003	50876	34	8.345335e+000	0	0	0	0	0	0	51173.2	1	1	57.5363	36.7308
DATA	2050	25	10	0	0	A_64_P010494	NM_001001421	670.145	361.447	1.455286e+002	1.492023e+001	197.5	32	7.772085e+000	0	0	0	0	0	0	138.627	1	1	49.8279	31.697
DATA	2051	25	11	0	0	A_64_P054606	NM_001107279	695.563	361.479	4.001994e+002	4.015362e+001	452	28.5	6.260166e+000	0	0	0	0	0	0	383.174	1	1	48.2044	28.3056
DATA	2052	25	12	0	0	A_44_P335679	NM_001108168	721	361.455	3.970468e+001	5.136236e+000	101	30	9.311267e+000	0	0	0	0	0	0	38.1964	1	1	55.8519	30.4595
DATA	2053	25	13	0	0	A_64_P128766	NM_001034912	746.413	361.44	1.523103e+002	1.557267e+001	210.5	30.5	7.333232e+000	0	0	0	0	0	0	147.168	1	1	49.5074	31.7353
DATA	2054	25	14	0	0	A_42_P595591	NM_031011	771.747	361.373	1.920970e+004	1.920973e+003	18207	36.5	9.527938e+000	0	0	0	0	0	0	18635.7	1	1	49.1849	35.3333
DATA	2055	25	15	0	0	A_44_P962846	ENSRNOT00000058887	797.325	361.312	2.623862e+002	2.643535e+001	323	31	6.611424e+000	0	0	0	0	0	0	255.488	1	1	49.8279	30.6286
DATA	2056	25	16	0	0	A_64_P111878	XR_005569	822.207	360.879	1.620257e+003	1.620574e+002	1799	31.5	8.322798e+000	0	0	0	0	0	0	1582.75	1	1	43.3362	32.2
DATA	2057	25	17	0	0	A_64_P149225	NM_001100833	848	361.455	1.048585e+005	1.048585e+004	103232	33	1.146892e+001	0	0	0	0	0	0	102748	1	1	55.8519	36.1667
DATA	2058	25	18	0	0	A_64_P032361	ENSRNOT00000061428	873.123	361.603	1.464220e+003	1.464568e+002	1488	33	7.552770e+000	0	0	0	0	0	0	1438.55	1	1	48.5334	33.5172
DATA	2059	25	19	0	0	A_64_P038843	A_64_P038843	898.787	361.36	2.797504e+001	4.237637e+000	90.5	31.5	9.387223e+000	0	0	0	0	0	0	27.5486	1	1	49.1849	33.4063
DATA	2060	25	20	1028	1	(+)E1A_r60_a97	E1A_r60_a97	924.333	361.5	1.377847e+001	3.462524e+000	75	31	7.801997e+000	0	0	0	0	0	0	13.5959	1	0	65	32.475
DATA	2061	25	21	0	0	A_42_P586883	NM_001106416	949.362	361.058	6.897827e+001	7.591976e+000	129	30	6.639226e+000	0	0	0	0	0	0	68.1745	1	1	46.5243	29.7353
DATA	2062	25	22	0	0	A_42_P626023	NM_001107265	974.893	361.5	9.116901e+002	9.122400e+001	939.5	31	7.346937e+000	0	0	0	0	0	0	902.345	1	1	56.9804	31.4595
DATA	2063	25	23	0	0	A_64_P304646	ENSRNOT00000046873	1000.1	361.611	5.509838e+001	6.353467e+000	117	31	7.723898e+000	0	0	0	0	0	0	54.5917	1	1	48.5334	32.2632
DATA	2064	25	24	0	0	A_42_P540711	NM_133568	1025.44	361.52	1.302138e+004	1.302142e+003	12730	37	8.821569e+000	0	0	0	0	0	0	12911.4	1	1	49.1849	37.8485
DATA	2065	25	25	0	0	A_64_P079149	XM_001063529	1051.33	361.5	9.431955e+001	9.947137e+000	156.5	34.5	6.505503e+000	0	0	0	0	0	0	93.5668	1	1	57.5363	34.4688
DATA	2066	25	26	0	0	A_42_P507072	FQ213070	1076.25	361.644	4.939478e+003	4.939579e+002	4829.5	31	7.304333e+000	0	0	0	0	0	0	4900.97	1	1	48.5334	30.7407
DATA	2067	25	27	0	0	A_44_P314270	ENSRNOT00000015469	1101.57	361.392	2.039324e+002	2.063654e+001	265	29.5	6.671793e+000	0	0	0	0	0	0	202.317	1	1	49.1849	29.5
DATA	2068	25	28	0	0	A_64_P026098	ENSRNOT00000027092	1127.42	361.427	1.133769e+002	1.177002e+001	173	32	8.139906e+000	0	0	0	0	0	0	112.435	1	1	57.5363	32.5161
DATA	2069	25	29	0	0	A_64_P018599	XM_229548	1152.67	361.5	3.173214e+000	3.162770e+000	60	33	7.410122e+000	0	0	0	0	0	0	-1.80611	0	0	57.5363	32.9189
DATA	2070	25	30	0	0	A_43_P15907	NM_001134567	1178.11	361.5	5.119903e+001	6.019542e+000	114	34	1.027446e+001	0	0	0	0	0	0	50.6947	1	1	56.9804	35.1351
DATA	2071	25	31	0	0	A_64_P151804	A_64_P151804	1203.5	361.5	6.255005e+001	7.012138e+000	123	32	1.222426e+001	0	0	0	0	0	0	61.8614	1	1	57.5363	32.8929
DATA	2072	25	32	0	0	A_42_P642743	NM_017005	1228.51	361.6	1.560112e+004	1.560115e+003	14982.5	32	7.579617e+000	0	0	0	0	0	0	15408	1	1	49.8279	32.2174
DATA	2073	25	33	0	0	A_42_P630463	NM_022238	1254.23	361.541	3.804332e+002	3.817592e+001	431.5	36	7.809561e+000	0	0	0	0	0	0	375.089	1	1	48.8603	37.5484
DATA	2074	25	34	0	0	A_64_P119533	NM_001000351	1279.58	361.573	2.266877e+001	3.909473e+000	84	33	8.376555e+000	0	0	0	0	0	0	22.3081	1	1	57.5363	33.6
DATA	2075	25	35	0	0	A_64_P158068	FQ219182	1304.82	361.653	3.985490e+003	3.985617e+002	3989	33.5	8.706954e+000	0	0	0	0	0	0	3913.85	1	1	47.5395	34.6471
DATA	2076	25	36	0	0	A_64_P000779	XM_225838	1330.52	361.693	3.680196e+001	4.876492e+000	98	35	9.073772e+000	0	0	0	0	0	0	36.055	1	1	49.1849	35.4
DATA	2077	25	37	0	0	A_44_P630082	ENSRNOT00000020640	1355.56	361.479	1.876166e+002	1.903388e+001	247	28	7.384246e+000	0	0	0	0	0	0	183.341	1	1	48.2044	31.2069
DATA	2078	25	38	0	0	A_42_P717654	XM_001063683	1380.82	361.507	4.006834e+003	4.006963e+002	3770	32	7.419532e+000	0	0	0	0	0	0	3904.81	1	1	47.8731	32.871
DATA	2079	25	39	0	0	A_42_P792382	NM_017257	1406.31	361.611	8.574991e+003	8.575051e+002	8249	31	9.215332e+000	0	0	0	0	0	0	8331.99	1	1	48.2044	34.1212
DATA	2080	25	40	0	0	A_64_P075035	NM_001001014	1432	361.545	1.734072e+002	1.764012e+001	230	40.5	1.179343e+001	0	0	0	0	0	0	167.956	1	1	55.8519	40.5333
DATA	2081	25	41	0	0	A_64_P021281	NM_001039022	1457.44	361.534	5.875357e+003	5.875446e+002	5470.5	39	9.115688e+000	0	0	0	0	0	0	5671.71	1	1	49.1849	39.4688
DATA	2082	25	42	0	0	A_44_P729533	TC581820	1482.68	361.746	7.628332e+003	7.628402e+002	7136	31	9.119576e+000	0	0	0	0	0	0	7338.54	1	1	47.5395	33.6
DATA	2083	25	43	0	0	A_42_P802358	NM_001024341	1507.79	361.747	1.161728e+004	1.161732e+003	10599	33	7.810165e+000	0	0	0	0	0	0	11135.5	1	1	48.8603	33.4643
DATA	2084	25	44	0	0	A_42_P481087	XM_232226	1533.09	361.896	1.412418e+003	1.412799e+002	1358	35	6.423914e+000	0	0	0	0	0	0	1348.73	1	1	46.8651	36
DATA	2085	25	45	0	0	A_42_P561597	NM_001106486	1558.81	361.481	1.039695e+004	1.039700e+003	9611	34.5	9.465183e+000	0	0	0	0	0	0	9887.79	1	1	49.8279	35.1944
DATA	2086	25	46	0	0	A_64_P113381	A_64_P113381	1584.42	361.573	2.358592e+002	2.381699e+001	271	34	9.184840e+000	0	0	0	0	0	0	223.384	1	1	57.5363	33.8065
DATA	2087	25	47	0	0	A_64_P088695	NM_001134414	1609.57	361.608	1.418962e+003	1.419351e+002	1346.5	33	6.855116e+000	0	0	0	0	0	0	1338.29	1	1	49.1849	32.7241
DATA	2088	25	48	0	0	A_44_P728586	ENSRNOT00000013367	1635.42	361.573	1.246487e+003	1.246934e+002	1225	31.5	6.546420e+000	0	0	0	0	0	0	1170.41	1	1	57.5363	31.4118
DATA	2089	25	49	0	0	A_42_P544898	NM_001108279	1660.5	361.648	3.344060e+001	4.735530e+000	92	37	7.247359e+000	0	0	0	0	0	0	31.2615	1	1	57.5363	35.7037
DATA	2090	25	50	0	0	A_44_P432910	NM_012814	1686	361.545	1.347563e+005	1.347563e+004	126878	33	8.938226e+000	0	0	0	0	0	0	125396	1	1	55.8519	33.6757
DATA	2091	25	51	0	0	A_64_P157820	XM_001079095	1711.42	361.573	7.400069e+001	8.137204e+000	131	32	8.236559e+000	0	0	0	0	0	0	68.5396	1	1	57.5363	32.8182
DATA	2092	25	52	0	0	A_42_P601802	NM_134465	1736.44	361.973	3.024789e+003	3.024980e+002	2737	36	7.597983e+000	0	0	0	0	0	0	2788.66	1	1	48.5334	35.037
DATA	2093	25	53	0	0	A_64_P039737	NM_001130508	1762.13	361.757	6.201741e+002	6.211145e+001	622	31	5.707570e+000	0	0	0	0	0	0	568.956	1	1	46.5243	32.1724
DATA	2094	25	54	0	0	A_42_P648800	AA998304	1787.24	361.986	1.711519e+002	1.745611e+001	217	33.5	1.189432e+001	0	0	0	0	0	0	156.265	1	1	46.8651	36.4063
DATA	2095	25	55	0	0	A_64_P007009	ENSRNOT00000014567	1812.76	362	2.776606e+003	2.776821e+002	2585	29.5	6.916262e+000	0	0	0	0	0	0	2522.55	1	1	46.8651	30.6875
DATA	2096	25	56	0	0	A_64_P049527	TC606896	1838.14	362.014	2.272402e+002	2.298704e+001	261	27.5	6.160550e+000	0	0	0	0	0	0	205.421	1	1	46.8651	27.7857
DATA	2097	25	57	0	0	A_44_P281595	NM_001037556	1863.47	362.123	6.307508e+001	7.206133e+000	119	23	6.388010e+000	0	0	0	0	0	0	56.7347	1	1	48.2044	25.16
DATA	2098	25	58	0	0	A_44_P374638	NM_024391	1889.39	361.931	5.088568e+001	6.177696e+000	105.5	29	5.450688e+000	0	0	0	0	0	0	45.5337	1	1	65	29.28
DATA	2100	25	60	0	0	A_64_P046416	A_64_P046416	1939.91	361.935	9.660248e+001	1.028789e+001	146	31	5.987808e+000	0	0	0	0	0	0	85.5752	1	1	54.4085	31.4231
DATA	2101	25	61	0	0	A_44_P428560	NM_001001358	1964.83	362	6.380128e+001	7.304179e+000	115	33	5.334197e+000	0	0	0	0	0	0	56.2389	1	1	46.8651	32.9706
DATA	2102	25	62	0	0	A_44_P208887	NM_001105774	1990.72	361.859	9.116062e+001	9.791785e+000	144.5	32	1.042620e+001	0	0	0	0	0	0	79.9408	1	1	47.5395	33.5625
DATA	2103	25	63	0	0	A_42_P533792	NM_001106575	2015.63	362	1.166830e+004	1.166835e+003	9548	38	9.495916e+000	0	0	0	0	0	0	10182.2	1	1	48.5334	39.3793
DATA	2104	25	64	0	0	A_42_P802550	NM_017365	2041.09	362.104	3.672956e+002	3.690653e+001	366	31.5	1.000076e+001	0	0	0	0	0	0	318.927	1	1	46.8651	34.5
DATA	2105	25	65	0	0	A_42_P545129	ENSRNOT00000007554	2066.56	362.027	9.630541e+002	9.637372e+001	870	35	9.572474e+000	0	0	0	0	0	0	832.093	1	1	48.5334	35.0323
DATA	2106	25	66	0	0	A_42_P500675	NM_013179	2092.27	362.225	4.781631e+002	4.795508e+001	475	33	9.626382e+000	0	0	0	0	0	0	411.125	1	1	47.2035	33.4571
DATA	2107	25	67	0	0	A_44_P127238	NM_001127655	2117.56	362.023	9.234218e+002	9.241481e+001	826	36	1.125921e+001	0	0	0	0	0	0	790.143	1	1	50.1463	39.6452
DATA	2108	25	68	0	0	A_64_P042142	ENSRNOT00000027371	2142.93	362.2	1.260183e+002	1.312826e+001	165.5	34	8.566392e+000	0	0	0	0	0	0	107.327	1	1	46.8651	33.3125
DATA	2109	25	69	0	0	A_44_P279756	NM_022848	2167.85	362.048	9.616253e+000	3.820209e+000	67	32	1.058524e+001	0	0	0	0	0	0	8.15267	1	0	45.1352	32.8788
DATA	2110	25	70	0	0	A_64_P119597	NM_001106871	2193.61	362.069	1.013923e+001	3.850049e+000	69	30	6.543712e+000	0	0	0	0	0	0	8.55684	1	0	53.8203	30.6571
DATA	2111	25	71	0	0	A_44_P790674	NM_001191933	2219.17	362.029	4.797095e+001	6.076985e+000	99.5	29	9.375672e+000	0	0	0	0	0	0	40.3053	1	1	46.8651	31.6452
DATA	2112	25	72	0	0	A_44_P405618	ENSRNOT00000025426	2244.44	362.028	2.481845e+002	2.509964e+001	269	29	8.283738e+000	0	0	0	0	0	0	207.643	1	1	48.2044	29.5294
DATA	2113	25	73	0	0	A_42_P719478	NM_001191779	2270	362	2.362228e+001	4.442227e+000	79	30	7.893864e+000	0	0	0	0	0	0	19.6816	1	1	54.9904	29.9487
DATA	2114	25	74	0	0	A_64_P061424	A_64_P061424	2295.25	362.265	2.797584e+001	4.700009e+000	82	26	5.834541e+000	0	0	0	0	0	0	23.2186	1	1	46.8651	26.5517
DATA	2115	25	75	0	0	A_44_P1042876	NM_212504	2320.34	362.123	1.717915e+003	1.718333e+002	1406	29	5.816572e+000	0	0	0	0	0	0	1420.4	1	1	48.5334	29.7586
DATA	2116	25	76	0	0	A_44_P470043	NM_001108103	2346.27	362.3	1.398391e+002	1.449231e+001	178	27.5	5.712739e+000	0	0	0	0	0	0	115.199	1	1	46.8651	29.6538
DATA	2117	25	77	0	0	A_64_P108484	ENSRNOT00000046584	2371.88	362.015	3.885019e+001	5.447304e+000	90	28.5	7.172745e+000	0	0	0	0	0	0	31.8922	1	1	46.8651	29
DATA	2118	25	78	0	0	A_42_P666065	NM_001014069	2396.84	362.103	5.646959e+002	5.659934e+001	531	27.5	9.437524e+000	0	0	0	0	0	0	462.105	1	1	46.5243	28.5263
DATA	2119	25	79	0	0	A_64_P136571	NM_001134545	2422.54	362.147	7.826692e+001	8.718833e+000	123.5	28.5	4.534992e+000	0	0	0	0	0	0	63.854	1	1	46.8651	28.3846
DATA	2120	25	80	0	0	A_42_P816740	NM_001108705	2447.58	362.427	4.703239e+002	4.718989e+001	454.5	30.5	6.785811e+000	0	0	0	0	0	0	382.69	1	1	57.5363	29.2059
DATA	2121	25	81	0	0	A_64_P018142	NM_001100716	2473.42	362.427	2.225042e+002	2.258313e+001	240.5	30	7.528435e+000	0	0	0	0	0	0	180.58	1	1	57.5363	30.0345
DATA	2122	25	82	0	0	A_42_P779687	ENSRNOT00000034449	2498.38	362.295	7.442671e+003	7.442771e+002	5851	28	6.781940e+000	0	0	0	0	0	0	6026.66	1	1	50.4627	30.0714
DATA	2124	25	84	66	1	DarkCorner	DarkCorner	2549.42	362.427	3.898196e+000	3.885366e+000	55	31	9.877995e+000	0	0	0	0	0	0	-2.3753	0	0	57.5363	31.1143
DATA	2125	25	85	66	1	DarkCorner	DarkCorner	2575.15	362.869	3.903402e+000	3.890555e+000	55.5	30	8.260901e+000	0	0	0	0	0	0	-3.48015	0	0	51.0895	29.8421
DATA	2126	26	1	66	1	DarkCorner	DarkCorner	454.481	368.74	3.497437e+000	3.487757e+000	66	29	7.802234e+000	0	0	0	0	0	0	1.01602	0	0	49.8279	29.5116
DATA	2127	26	2	66	1	DarkCorner	DarkCorner	479.808	368.654	3.468512e+000	3.457096e+000	62	27	9.792050e+000	0	0	0	0	0	0	-1.08288	0	0	49.8279	30.2069
DATA	2128	26	3	0	0	A_42_P713844	NM_001106167	504.747	368.627	9.779494e+002	9.785509e+001	938	31	7.672162e+000	0	0	0	0	0	0	893.633	1	1	49.1849	31.1724
DATA	2129	26	4	0	0	A_42_P627219	NM_001012468	530.592	368.746	1.192311e+004	1.192316e+003	10671	31	6.457906e+000	0	0	0	0	0	0	10979.4	1	1	47.5395	30.7273
DATA	2130	26	5	0	0	A_42_P461003	NM_001044283	555.867	368.386	1.389288e+004	1.389292e+003	12672	31	7.957485e+000	0	0	0	0	0	0	12884.2	1	1	51.4001	29.9688
DATA	2131	26	6	0	0	A_44_P1019923	NM_022522	581.375	368.486	2.812472e+003	2.812673e+002	2612	31	6.657521e+000	0	0	0	0	0	0	2626.12	1	1	48.2044	31.25
DATA	2132	26	7	0	0	A_42_P814056	NM_001108866	606.627	368.64	8.981091e+003	8.981153e+002	8507	34	8.018656e+000	0	0	0	1	0	0	8439.63	1	1	48.8603	33.3333
DATA	2133	26	8	0	0	A_42_P795269	NM_001134730	632.095	368.556	9.013169e+003	9.013230e+002	8654	33	8.515544e+000	0	0	0	0	0	0	8520.96	1	1	44.0646	35.5833
DATA	2134	26	9	0	0	A_42_P763522	NM_001013980	657.264	368.736	4.106632e+003	4.106764e+002	3942	34	9.042937e+000	0	0	0	0	0	0	3904.22	1	1	47.5395	36.1333
DATA	2135	26	10	0	0	A_44_P292437	NM_153309	682.592	368.958	2.424016e+002	2.446101e+001	296.5	29	7.223452e+000	0	0	0	0	0	0	231.675	1	1	48.2044	28.9412
DATA	2136	26	11	0	0	A_64_P065313	ENSRNOT00000042070	708.191	368.779	1.295267e+002	1.335747e+001	188.5	30	8.151484e+000	0	0	0	0	0	0	124.407	1	1	46.1809	29.641
DATA	2137	26	12	0	0	A_64_P008047	NM_001033670	733.388	368.925	2.666286e+004	2.666288e+003	25286	29	7.448598e+000	0	0	0	0	0	0	25725.3	1	1	46.1809	28.6333
DATA	2138	26	13	0	0	A_64_P080612	TC638889	759.136	369.085	5.042601e+003	5.042705e+002	4945	34	7.143951e+000	0	0	0	0	0	0	4886.08	1	1	44.0646	33.7297
DATA	2139	26	14	0	0	A_43_P17696	NM_001004257	784.182	368.621	3.174214e+003	3.174377e+002	3029	30.5	7.463491e+000	0	0	0	0	0	0	3087.22	1	1	45.4864	31
DATA	2140	26	15	0	0	A_64_P019608	NM_001105713	809.767	368.712	6.663182e+002	6.670917e+001	703	30	6.230049e+000	0	0	0	0	0	0	650.35	1	1	48.5334	30.3438
DATA	2141	26	16	0	0	A_64_P108575	ENSRNOT00000046600	835.418	368.573	6.289428e+001	7.057276e+000	125.5	32	7.961576e+000	0	0	0	0	0	0	61.582	1	1	57.5363	33.3793
DATA	2142	26	17	0	0	A_64_P136859	NM_001109642	860.225	369.099	7.282468e+003	7.282538e+002	7145.5	34	1.188890e+001	0	0	0	0	0	0	7150.53	1	1	46.8651	36.9583
DATA	2143	26	18	0	0	A_64_P021597	A_64_P021597	886.088	368.614	1.038662e+001	3.349506e+000	74	29.5	6.846511e+000	0	0	0	0	0	0	10.2238	1	0	57.259	30.5667
DATA	2144	26	19	0	0	A_64_P148032	A_64_P148032	911.213	369.23	1.912516e+002	1.938731e+001	258	32.5	8.884469e+000	0	0	0	0	0	0	188.668	1	1	45.1352	34.4286
DATA	2145	26	20	0	0	A_42_P743580	NM_017214	936.7	369.1	1.027581e+004	1.027586e+003	10119	30	8.767947e+000	0	0	0	0	0	0	10155.6	1	1	47.2035	31.2424
DATA	2146	26	21	0	0	A_42_P693964	NM_181087	962	368.797	2.796918e+003	2.797097e+002	2704	31	7.900272e+000	0	0	0	0	0	0	2768.34	1	1	46.8651	31.8205
DATA	2147	26	22	0	0	A_44_P1058389	NM_012992	987.507	368.873	1.784712e+004	1.784715e+003	17242.5	31	8.732586e+000	0	0	0	0	0	0	17686.5	1	1	47.8731	32
DATA	2148	26	23	0	0	A_44_P135224	NM_022187	1013.09	368.935	1.474503e+002	1.507985e+001	210	36.5	1.046244e+001	0	0	0	0	0	0	146.259	1	1	54.4085	37.8529
DATA	2149	26	24	0	0	A_64_P070249	ENSRNOT00000048236	1038.29	368.754	8.880993e+002	8.886606e+001	947.5	35.5	8.209315e+000	0	0	0	0	0	0	881.446	1	1	45.1352	36.5833
DATA	2150	26	25	0	0	A_42_P806899	NM_001108829	1063.61	368.931	2.248501e+001	3.875928e+000	83.5	31	6.626865e+000	0	0	0	0	0	0	22.3242	1	1	53.8203	31.2857
DATA	2151	26	26	0	0	A_42_P465144	NM_001107714	1088.96	368.693	7.930129e+001	8.535433e+000	144.5	28	7.103838e+000	0	0	0	0	0	0	78.7358	1	1	48.2044	29.2581
DATA	2152	26	27	0	0	A_43_P19712	NM_001106751	1114.77	369.014	1.546113e+001	3.515866e+000	77	29.5	7.596791e+000	0	0	0	0	0	0	15.3476	1	0	47.8731	30.5294
DATA	2153	26	28	0	0	A_42_P728472	NM_001007600	1139.7	368.9	8.552471e+003	8.552530e+002	8463	34.5	7.504569e+000	0	0	0	0	0	0	8485.37	1	1	47.2035	34.5625
DATA	2154	26	29	66	-1	(-)3xSLv1	NegativeControl	1165.5	369	3.172170e+000	3.161730e+000	59	34	9.189756e+000	0	0	0	0	0	0	-5.47898	0	0	54.1152	34.25
DATA	2155	26	30	0	0	A_42_P629394	NM_031683	1190.44	368.853	3.135391e+003	3.135551e+002	3025	33.5	1.152170e+001	0	0	0	0	0	0	3105.18	1	1	46.8651	35.9118
DATA	2156	26	31	0	0	A_64_P041977	A_64_P041977	1216.34	368.794	6.588619e+001	7.311183e+000	128	27.5	7.050375e+000	0	0	0	0	0	0	65.1656	1	1	46.5243	28.7727
DATA	2157	26	32	0	0	A_44_P126406	XM_228958	1241.2	368.885	7.277481e+003	7.277550e+002	7476	37	7.308583e+000	0	0	0	0	0	0	7187.2	1	1	44.7812	36.8462
DATA	2158	26	33	0	0	A_64_P021878	NM_001167664	1266.98	368.875	5.590957e+001	6.431828e+000	115	36	8.042682e+000	0	0	0	0	0	0	55.117	1	1	45.4864	36.4483
DATA	2159	26	34	0	0	A_64_P058719	NM_001014175	1292	369	7.536815e+003	7.536883e+002	7431.5	32	8.433676e+000	0	0	0	0	0	0	7415.49	1	1	46.8651	32.7576
DATA	2160	26	35	0	0	A_42_P495579	NM_001107564	1317.37	369.014	3.363191e+002	3.378313e+001	390	34	8.668924e+000	0	0	0	0	0	0	330.174	1	1	47.2035	34.6897
DATA	2161	26	36	0	0	A_64_P054979	NM_001109615	1343.3	369.1	6.913418e+001	7.618407e+000	131	32.5	5.800425e+000	0	0	0	0	0	0	67.7031	1	1	47.2035	32.0833
DATA	2162	26	37	0	0	A_44_P713838	ENSRNOT00000032874	1368.44	368.972	1.813254e+002	1.841433e+001	240.5	30	6.006385e+000	0	0	0	0	0	0	177.105	1	1	48.2044	29.92
DATA	2163	26	38	0	0	A_64_P158913	NM_001108101	1394	369	1.330786e+001	3.482655e+000	71	33	8.932844e+000	0	0	0	0	0	0	12.961	1	0	54.9904	33.0645
DATA	2164	26	39	0	0	A_43_P13018	NM_054004	1419	369	1.769468e+004	1.769471e+003	17258	32	9.792804e+000	0	0	0	0	0	0	17182.1	1	1	46.8651	34.5517
DATA	2165	26	40	0	0	A_64_P114383	A_64_P114383	1444.75	369	1.997089e+004	1.997092e+003	19489.5	40.5	9.868620e+000	0	0	0	0	0	0	19329.2	1	1	49.1849	40.7
DATA	2166	26	41	0	0	A_43_P16629	XM_001080634	1469.79	369.194	6.322656e+003	6.322740e+002	5854	36	1.089974e+001	0	0	0	0	0	0	6099.19	1	1	47.5395	36.7143
DATA	2167	26	42	0	0	A_42_P810313	NM_001108677	1495.37	369.014	7.534900e+001	8.210324e+000	135	30.5	9.156619e+000	0	0	0	0	0	0	72.4238	1	1	47.8731	32.1333
DATA	2168	26	43	0	0	A_42_P537516	NM_001106023	1520.7	369.1	1.339197e+004	1.339201e+003	12466.5	33.5	7.281105e+000	0	0	0	0	0	0	12824.5	1	1	47.2035	34.1667
DATA	2169	26	44	0	0	A_64_P006964	A_64_P006964	1546	368.983	1.449798e+002	1.486569e+001	205	34	6.959020e+000	0	0	0	0	0	0	138.299	1	1	44.0646	34.8065
DATA	2170	26	45	0	0	A_42_P829251	NM_133381	1571.58	369.427	3.244052e+001	4.626814e+000	92.5	34	9.450494e+000	0	0	0	0	0	0	30.8226	1	1	57.5363	34.6129
DATA	2171	26	46	0	0	A_42_P687443	NM_020100	1597.09	369.386	1.755736e+002	1.786717e+001	222	32.5	6.779721e+000	0	0	0	0	0	0	166.122	1	1	57.259	32.7308
DATA	2172	26	47	0	0	A_44_P196146	NM_031349	1622.5	369.352	1.663589e+002	1.696532e+001	217.5	33	6.506638e+000	0	0	0	0	0	0	156.731	1	1	57.5363	32.3243
DATA	2173	26	48	0	0	A_64_P050137	ENSRNOT00000058586	1647.87	368.79	2.440693e+002	2.463467e+001	292.5	33	6.403628e+000	0	0	0	0	0	0	228.917	1	1	44.7812	33.1613
DATA	2174	26	49	0	0	A_44_P637827	NM_001108797	1672.93	369.301	4.558955e+003	4.559078e+002	4055	33	7.932806e+000	0	0	0	0	0	0	4257.31	1	1	48.8603	34.8
DATA	2175	26	50	0	0	A_64_P070073	NM_001109590	1698.58	369.427	1.595562e+002	1.630807e+001	207	33	1.093923e+001	0	0	0	0	0	0	148.312	1	1	65	34
DATA	2176	26	51	0	0	A_64_P130572	NM_001109400	1724	369.234	1.233014e+003	1.233479e+002	1204	33.5	8.118448e+000	0	0	0	0	0	0	1140.72	1	1	49.1849	33.4333
DATA	2177	26	52	0	0	A_42_P658815	NM_198745	1749	369.5	1.596242e+003	1.596605e+002	1590	32.5	9.269269e+000	0	0	0	0	0	0	1469.91	1	1	44.4243	34.125
DATA	2179	26	54	0	0	A_43_P14809	TC581403	1800.01	369.229	1.481486e+003	1.481885e+002	1399	29.5	9.587760e+000	0	0	0	0	0	0	1350.91	1	1	46.8651	31.8824
DATA	2180	26	55	0	0	A_42_P553319	TC597248	1825.37	369.167	1.397758e+002	1.439813e+001	190.5	28	5.939136e+000	0	0	0	0	0	0	126.827	1	1	43.3362	29.76
DATA	2181	26	56	0	0	A_64_P004162	NM_019139	1850.43	369.353	8.419512e+000	3.572075e+000	68.5	24	6.617985e+000	0	0	0	0	0	0	7.6023	1	0	46.8651	25.5185
DATA	2182	26	57	0	0	A_64_P032450	NM_172330	1876.16	369.544	2.463412e+002	2.487998e+001	282	29	6.044941e+000	0	0	0	0	0	0	221.311	1	1	46.8651	29.1852
DATA	2183	26	58	0	0	A_44_P470976	NM_001013133	1901.68	369.318	4.931099e+001	6.050924e+000	106	31	7.117652e+000	0	0	0	0	0	0	44.0752	1	1	45.835	31.7407
DATA	2184	26	59	0	0	A_64_P166428	NM_001037205	1927.42	369.427	1.467401e+002	1.509140e+001	191	31	3.655090e+000	0	0	0	0	0	0	130.493	1	1	57.5363	31.2174
DATA	2185	26	60	0	0	A_43_P11576	NM_012821	1952.58	369.427	2.820123e+001	4.527887e+000	84	32	5.369668e+000	0	0	0	0	0	0	24.9538	1	1	65	34.2
DATA	2186	26	61	0	0	A_64_P156910	A_64_P156910	1978	369.455	2.379576e+002	2.406062e+001	264	31	7.798723e+000	0	0	0	0	0	0	209.499	1	1	65	31.4848
DATA	2187	26	62	0	0	A_64_P126140	NM_001191648	2003.42	369.427	4.982458e+001	6.134198e+000	100.5	32	1.054465e+001	0	0	0	0	0	0	43.6462	1	1	65	34.2414
DATA	2188	26	63	0	0	A_42_P637122	NM_001108351	2028.69	369.338	2.474291e+003	2.474552e+002	2126.5	37.5	1.224702e+001	0	0	0	0	0	0	2156.72	1	1	48.5334	40.2857
DATA	2189	26	64	0	0	A_64_P081208	NM_001009712	2053.97	369.215	1.215600e+004	1.215605e+003	10289	31	8.653459e+000	0	0	0	0	0	0	10543.6	1	1	45.835	32
DATA	2190	26	65	0	0	A_42_P465608	NM_130894	2079.44	369.534	3.517457e+003	3.517645e+002	3006	33	9.934914e+000	0	0	0	0	0	0	3036.21	1	1	49.1849	34.6571
DATA	2191	26	66	0	0	A_42_P485589	NM_017246	2104.89	369.5	1.297258e+002	1.347599e+001	172	35	8.941681e+000	0	0	0	0	0	0	111.437	1	1	56.9804	35.5294
DATA	2192	26	67	0	0	A_64_P031383	NM_020308	2130.19	369.608	6.538339e+002	6.548609e+001	604	36	8.501903e+000	0	0	0	0	0	0	559.028	1	1	49.1849	34.8
DATA	2193	26	68	0	0	A_44_P220647	NM_001107097	2155.44	369.972	8.295443e+001	9.076185e+000	130	33	1.162282e+001	0	0	0	0	0	0	70.6045	1	1	48.2044	33.1429
DATA	2194	26	69	0	0	A_44_P294687	NM_080885	2180.97	369.215	4.113624e+002	4.130232e+001	403.5	31	7.237615e+000	0	0	0	0	0	0	348.468	1	1	45.835	30.0625
DATA	2195	26	70	0	0	A_42_P512838	NM_001106884	2206.38	369.183	8.331804e+002	8.340090e+001	742	30	8.524684e+000	0	0	0	0	0	0	702.663	1	1	47.5395	31.2353
DATA	2196	26	71	0	0	A_42_P635228	NM_001107651	2231.83	369.672	5.937955e+001	7.013571e+000	109	30	1.181566e+001	0	0	0	0	0	0	49.8672	1	1	45.4864	33.1212
DATA	2197	26	72	0	0	A_44_P254687	NM_001105728	2257.19	369.19	2.144054e+002	2.176573e+001	239	29	7.755183e+000	0	0	0	0	0	0	179.29	1	1	45.1352	28.1667
DATA	2198	26	73	0	0	A_64_P049628	NM_001169145	2282.41	369.753	6.187277e+003	6.187392e+002	5044	28	6.753944e+000	0	0	0	0	0	0	5153.93	1	1	48.5334	27.4828
DATA	2199	26	74	0	0	A_64_P007703	NM_031674	2308.11	369.5	1.333586e+002	1.386065e+001	169	26	7.102614e+000	0	0	0	0	0	0	110.646	1	1	56.9804	27.9667
DATA	2200	26	75	0	0	A_42_P645376	NM_001014135	2333.31	369.662	2.994664e+004	2.994667e+003	24543.5	28	6.089036e+000	0	0	0	0	0	0	24756.4	1	1	48.5334	30.1724
DATA	2201	26	76	0	0	A_64_P040920	XM_577408	2358.77	369.754	4.237779e+003	4.237950e+002	3566	30.5	7.203845e+000	0	0	0	0	0	0	3491.07	1	1	45.1352	30.8462
DATA	2202	26	77	0	0	A_42_P819656	NM_130409	2384	369.729	4.464197e+003	4.464360e+002	3672	28	9.074294e+000	0	0	0	0	0	0	3665.48	1	1	46.8651	27.9697
DATA	2203	26	78	0	0	A_64_P018921	NM_001135012	2409.54	369.614	5.044759e+002	5.059274e+001	478.5	27	6.219111e+000	0	0	0	0	0	0	412.916	1	1	47.5395	28.0345
DATA	2204	26	79	0	0	A_43_P15253	NM_012967	2434.87	369.623	3.233943e+002	3.256668e+001	322	30.5	7.365430e+000	0	0	0	0	0	0	263.941	1	1	46.8651	29.4118
DATA	2205	26	80	0	0	A_64_P093063	NM_001136272	2460.09	370.106	3.995891e+002	4.014397e+001	401	30	7.496379e+000	0	0	0	0	0	0	325.309	1	1	46.1809	29.0645
DATA	2206	26	81	0	0	A_44_P477406	NM_012751	2485.61	370.149	3.441914e+002	3.463485e+001	343	30	6.297696e+000	0	0	0	0	0	0	279.538	1	1	46.1809	31.2593
DATA	2207	26	82	0	0	A_64_P056816	NM_001100697	2511.42	369.573	1.062422e+002	1.130655e+001	138	28	8.892627e+000	0	0	0	0	0	0	86.087	1	1	57.5363	31.3103
DATA	2208	26	83	0	0	A_42_P580733	NM_001006981	2536.43	370.232	5.659213e+003	5.659346e+002	4554	33	1.126831e+001	0	0	0	0	0	0	4577.95	1	1	46.8651	33.8438
DATA	2209	26	84	66	1	DarkCorner	DarkCorner	2561.95	370.066	3.893909e+000	3.881094e+000	57	33	9.348934e+000	0	0	0	0	0	0	-0.854493	0	0	47.5395	30.9474
DATA	2210	26	85	66	1	DarkCorner	DarkCorner	2587.42	369.573	3.899323e+000	3.889002e+000	59	26	7.110906e+000	0	0	0	0	0	0	1.12733	0	0	57.5363	26.7305
DATA	2211	27	1	66	1	DarkCorner	DarkCorner	441.429	375.604	3.509751e+000	3.509895e+000	65.5	28	7.364761e+000	0	0	0	0	0	0	2.56521	0	0	52.9257	29.0134
DATA	2212	27	2	66	1	DarkCorner	DarkCorner	466.882	375.941	3.479783e+000	3.468331e+000	61.5	27	6.094227e+000	0	0	0	0	0	0	-1.12848	0	0	46.8651	27.7037
DATA	2213	27	3	0	0	A_44_P289922	NM_139103	492.284	376.095	5.313826e+002	5.324951e+001	529.5	34.5	8.232768e+000	0	0	0	0	0	0	484.157	1	1	48.8603	33.4615
DATA	2214	27	4	0	0	A_64_P117149	ENSRNOT00000065538	517.633	375.596	7.203229e+000	3.489191e+000	71	31	7.298019e+000	0	0	0	0	0	0	6.61343	1	0	57.8122	30.2414
DATA	2215	27	5	0	0	A_42_P524308	NM_019213	543.433	375.761	1.042337e+003	1.042888e+002	1032	30	9.358683e+000	0	0	0	0	0	0	964.163	1	1	46.5243	30.5806
DATA	2216	27	6	0	0	A_64_P037562	XM_001070892	568.762	375.635	5.444882e+002	5.455272e+001	583	31	5.533864e+000	0	0	0	0	0	0	507.144	1	1	44.7812	31.9032
DATA	2217	27	7	0	0	A_44_P267706	XR_085883	594.093	375.935	2.724828e+001	4.312994e+000	86	36	5.577562e+000	0	0	0	0	0	0	25.5469	1	1	54.4085	34.8333
DATA	2218	27	8	0	0	A_64_P082569	XM_001053354	619.5	376	1.181663e+001	3.526469e+000	74	34	9.175492e+000	0	0	0	0	0	0	11.1476	1	0	54.1152	34.2414
DATA	2219	27	9	0	0	A_64_P000539	NM_053930	644.756	375.977	1.585956e+004	1.585960e+003	14783	35	9.513668e+000	0	0	0	0	0	0	15048.3	1	1	51.0895	37.6522
DATA	2220	27	10	0	0	A_43_P22124	NM_213625	670	375.797	1.386871e+003	1.387260e+002	1312	30	6.060099e+000	0	0	0	0	0	0	1323.04	1	1	46.8651	29.2813
DATA	2221	27	11	0	0	A_44_P1012556	NM_001013988	695.5	376	1.396558e+002	1.434306e+001	203	28	8.851957e+000	0	0	0	0	0	0	133.912	1	1	48.5334	29
DATA	2222	27	12	0	0	A_64_P115457	NM_001106361	721	376	1.339534e+002	1.378479e+001	193	29	9.065812e+000	0	0	0	0	0	0	129.054	1	1	54.9904	29.5882
DATA	2223	27	13	0	0	A_64_P064229	A_64_P064229	746.042	375.75	2.664987e+001	4.194911e+000	89	30	8.258604e+000	0	0	0	0	0	0	25.7851	1	1	47.2035	31.7273
DATA	2224	27	14	0	0	A_64_P039066	ENSRNOT00000041345	771.691	376.088	6.736199e+001	7.469015e+000	130.5	33.5	7.513216e+000	0	0	0	0	0	0	65.4426	1	1	45.835	34.1786
DATA	2225	27	15	0	0	A_42_P574960	ENSRNOT00000068719	797	376	7.958448e+002	7.964938e+001	839	33	6.002136e+000	0	0	0	0	0	0	775.986	1	1	46.8651	32.1111
DATA	2226	27	16	0	0	A_42_P600215	NM_175844	822.5	376	5.912903e+001	6.725187e+000	121.5	33.5	7.439896e+000	0	0	0	0	0	0	57.8459	1	1	54.1152	32.7353
DATA	2227	27	17	0	0	A_42_P607770	NM_001134616	847.603	376.219	9.899336e+003	9.899387e+002	9258.5	43	1.026594e+001	0	0	0	0	0	0	9713.3	1	1	47.8731	39.5417
DATA	2228	27	18	0	0	A_64_P003348	NM_001077660	873.372	376.205	5.163726e+002	5.173545e+001	566	29	9.122041e+000	0	0	0	0	0	0	508.031	1	1	49.5074	31.7857
DATA	2229	27	19	0	0	A_64_P057828	A_64_P057828	898.408	376.092	1.050200e+003	1.050681e+002	1110	29	5.981691e+000	0	0	0	0	0	0	1035.59	1	1	49.1849	29.6296
DATA	2230	27	20	0	0	A_64_P081765	NM_134355	924.5	376	3.912716e+001	5.037093e+000	104	32	7.936749e+000	0	0	0	0	0	0	38.6618	1	1	65	33.0882
DATA	2231	27	21	0	0	A_42_P758886	NM_019258	949.136	375.763	2.952924e+002	2.969860e+001	359	29	8.029509e+000	0	0	0	0	0	0	292.25	1	1	44.4243	30.3889
DATA	2232	27	22	0	0	A_42_P745470	XM_001066818	974.562	376.027	9.310664e+003	9.310717e+002	9093	31	8.032622e+000	0	0	0	0	0	0	9227.68	1	1	48.5334	31.1389
DATA	2233	27	23	0	0	A_42_P800949	NM_031787	999.924	375.97	2.946901e+002	2.963788e+001	352.5	36	1.220393e+001	0	0	0	0	0	0	292.375	1	1	46.8651	37.6897
DATA	2234	27	24	0	0	A_42_P738559	NM_012801	1025.44	376.027	1.612833e+004	1.612837e+003	15739.5	35.5	9.358455e+000	0	0	0	0	0	0	16014.1	1	1	48.5334	36.6071
DATA	2235	27	25	0	0	A_42_P749550	NM_001109359	1050.83	376.014	3.571600e+003	3.571739e+002	3588.5	33.5	7.502107e+000	0	0	0	0	0	0	3548	1	1	46.8651	32.8333
DATA	2236	27	26	0	0	A_64_P007493	ENSRNOT00000006658	1076.41	376.095	3.715193e+001	4.873896e+000	99	30	7.297532e+000	0	0	0	0	0	0	36.9138	1	1	48.8603	30.0714
DATA	2237	27	27	0	0	A_64_P056182	NM_053363	1101.43	376.239	1.249015e+003	1.249414e+002	1295	29	6.356022e+000	0	0	0	0	0	0	1240.92	1	1	46.5243	28.5517
DATA	2238	27	28	0	0	A_42_P818546	NM_001191600	1127.12	375.939	6.872045e+002	6.879289e+001	766	30	7.780317e+000	0	0	0	0	0	0	682.479	1	1	46.5243	31.3333
DATA	2239	27	29	0	0	A_44_P407948	XM_001055260	1152.58	376.427	2.428003e+001	3.983516e+000	88	34	9.115743e+000	0	0	0	0	0	0	24.099	1	1	57.5363	34.75
DATA	2240	27	30	66	-1	(-)3xSLv1	NegativeControl	1178.09	376.386	3.171322e+000	3.160884e+000	53	36.5	1.014869e+001	0	0	0	0	0	0	-8.51207	0	0	65	37.8125
DATA	2241	27	31	0	0	A_64_P044505	NM_031587	1203.35	375.8	2.634882e+002	2.653819e+001	318	32	8.469913e+000	0	0	0	0	0	0	260.974	1	1	45.4864	31.5357
DATA	2242	27	32	0	0	A_42_P685138	NM_153621	1228.69	375.706	5.840813e+002	5.849404e+001	614.5	32	7.651642e+000	0	0	0	1	0	0	577.699	1	1	46.5243	34.619
DATA	2243	27	33	0	0	A_64_P121747	ENSRNOT00000050332	1254.23	376.136	1.330175e+001	3.441635e+000	77.5	35	7.949166e+000	0	0	0	0	0	0	13.1354	1	0	45.835	36.5484
DATA	2244	27	34	0	0	A_42_P791436	NM_012750	1279.36	376.13	1.413967e+003	1.414325e+002	1441	33	6.365416e+000	0	0	0	0	0	0	1393.7	1	1	46.8651	33
DATA	2245	27	35	0	0	A_44_P349309	NM_001100890	1305.07	376.206	4.104061e+002	4.116415e+001	464	36	1.002899e+001	0	0	0	0	0	0	403.671	1	1	46.5243	36.2258
DATA	2246	27	36	0	0	A_42_P502621	NM_024401	1330.5	376.352	8.153005e+001	8.756363e+000	148.5	36	6.416042e+000	0	0	0	0	0	0	80.008	1	1	57.5363	35.0323
DATA	2247	27	37	0	0	A_43_P21574	NM_001012043	1355.52	376.125	9.646098e+001	1.016371e+001	158	31.5	7.338478e+000	0	0	0	0	0	0	94.4228	1	1	44.0646	32.125
DATA	2248	27	38	0	0	A_44_P496331	NM_001001085	1381.06	375.823	7.403872e+001	8.070204e+000	135	30	7.061633e+000	0	0	0	0	0	0	72.2733	1	1	45.1352	31
DATA	2249	27	39	0	0	A_64_P016503	ENSRNOT00000003659	1406.58	376.427	1.147750e+002	1.192070e+001	179	31	9.072415e+000	0	0	0	0	0	0	111.718	1	1	65	32.9394
DATA	2250	27	40	0	0	A_43_P13270	NM_134415	1431.68	376.254	2.330287e+004	2.330289e+003	22415.5	38	1.149259e+001	0	0	0	0	0	0	22612.1	1	1	47.5395	38.2813
DATA	2251	27	41	0	0	A_42_P553960	NM_001107831	1457.31	376.338	1.013498e+004	1.013504e+003	9483.5	39.5	1.121375e+001	0	0	0	0	0	0	9802.07	1	1	48.5334	39.1
DATA	2252	27	42	0	0	A_44_P428997	NM_001107661	1482.25	376.356	5.086640e+002	5.097024e+001	534.5	33	8.275636e+000	0	0	0	0	0	0	490.288	1	1	48.5334	33.6154
DATA	2253	27	43	0	0	A_42_P619926	NM_001106578	1508.42	376.427	1.573241e+002	1.606745e+001	215.5	30	8.844557e+000	0	0	0	0	0	0	151.077	1	1	57.5363	31.6786
DATA	2255	27	45	0	0	A_44_P524471	NM_001106408	1558.86	375.828	9.205919e+002	9.211794e+001	924	31	9.174076e+000	0	0	0	0	0	0	877.223	1	1	45.4864	32.0541
DATA	2256	27	46	0	0	A_43_P10009	XM_347035	1584.06	375.825	6.721306e+003	6.721387e+002	6450	33.5	8.677877e+000	0	0	0	0	0	0	6378.88	1	1	45.4864	33.25
DATA	2257	27	47	0	0	A_64_P068112	A_64_P068112	1609.5	376.204	8.726987e+003	8.727050e+002	9043.5	32	5.957568e+000	0	0	0	0	0	0	8248.1	1	1	42.2201	31.2759
DATA	2258	27	48	0	0	A_44_P191715	NM_021666	1635.33	376.5	3.341922e+000	3.339762e+000	65	33	5.974138e+000	0	0	0	0	0	0	2.28493	0	0	57.5363	32.9032
DATA	2259	27	49	0	0	A_64_P035769	NM_001108962	1660.5	376.5	1.611940e+003	1.612287e+002	1642	32.5	5.966058e+000	0	0	0	0	0	0	1510.24	1	1	57.5363	31.9231
DATA	2260	27	50	0	0	A_64_P158469	XM_579990	1685.89	376.5	1.131175e+001	3.546006e+000	71	33	1.139721e+001	0	0	0	0	0	0	10.5502	1	0	56.9804	36.7838
DATA	2261	27	51	0	0	A_43_P12811	NM_053464	1711	376.657	1.905799e+003	1.906098e+002	1794	32	7.631604e+000	0	0	0	0	0	0	1769.44	1	1	45.4864	31.7931
DATA	2262	27	52	0	0	A_44_P370694	NM_001107961	1736.67	376.5	2.205706e+001	4.046268e+000	82	35	7.680026e+000	0	0	0	0	0	0	20.3812	1	1	57.5363	33.871
DATA	2263	27	53	0	0	A_42_P749550	NM_001109359	1761.93	376.493	3.507769e+003	3.507934e+002	3196.5	32.5	9.938521e+000	0	0	0	0	0	0	3225.89	1	1	47.8731	33.25
DATA	2264	27	54	0	0	A_64_P125893	ENSRNOT00000021391	1787.44	376.479	1.512060e+004	1.512064e+003	13493	36	1.282441e+001	0	0	0	0	0	0	13838	1	1	48.2044	39.5862
DATA	2265	27	55	0	0	A_44_P1000653	NM_031531	1812.89	376.5	1.071195e+002	1.125132e+001	165	28.5	9.101137e+000	0	0	0	0	0	0	97.5533	1	1	56.9804	29.6429
DATA	2266	27	56	0	0	A_64_P035992	A_64_P035992	1838.51	376.542	4.643241e+002	4.656108e+001	497	30	8.891720e+000	0	0	0	0	0	0	420.758	1	1	43.3362	30.2963
DATA	2267	27	57	0	0	A_42_P592385	NM_022935	1863.45	376.863	1.168564e+001	3.666984e+000	70.5	25.5	8.193206e+000	0	0	0	0	0	0	10.5381	1	0	48.2044	27.4583
DATA	2268	27	58	0	0	A_64_P065624	ENSRNOT00000039260	1889.11	376.5	1.638662e+001	3.858853e+000	76	30	5.317737e+000	0	0	0	0	0	0	14.702	1	0	65	29.2759
DATA	2269	27	59	0	1	ERCC-00097_63	ERCC-00097_63	1914.6	376.879	3.656989e+001	5.069619e+000	97	30.5	7.160600e+000	0	0	0	0	0	0	32.6478	1	1	42.9674	30.875
DATA	2270	27	60	0	0	A_42_P477625	NM_001108719	1939.63	376.63	4.147173e+003	4.147323e+002	3549	31.5	4.729124e+000	0	0	0	0	0	0	3683.94	1	1	48.2044	32.2692
DATA	2271	27	61	0	0	A_42_P788030	NM_031618	1965.38	376.444	2.908023e+004	2.908025e+003	25037	33	6.714076e+000	0	0	0	0	0	0	25700.1	1	1	48.2044	35.3103
DATA	2272	27	62	0	0	A_44_P278247	XM_219377	1990.38	376.444	9.462234e+003	9.462301e+002	7977	29	7.437915e+000	0	0	0	0	0	0	8321.32	1	1	48.2044	29.5484
DATA	2273	27	63	0	0	A_44_P189262	NM_024000	2015.86	376.722	1.805629e+004	1.805632e+003	15068	40	1.098112e+001	0	0	0	0	0	0	15800.9	1	1	47.8731	39.5806
DATA	2274	27	64	0	0	A_44_P212850	NM_019305	2041.5	376.5	3.945588e+001	5.341092e+000	93.5	35	1.055131e+001	0	0	0	1	0	0	34.3544	1	1	65	34.6111
DATA	2275	27	65	0	0	A_64_P144278	NM_001106525	2066.65	377.138	1.185762e+004	1.185767e+003	10191	35	1.081244e+001	0	0	0	0	0	0	10276	1	1	45.4864	34.8621
DATA	2276	27	66	0	0	A_44_P683816	NM_001127488	2092.15	377.134	2.038209e+002	2.070361e+001	230	33	6.339062e+000	0	0	0	0	0	0	175.78	1	1	46.1809	32.3939
DATA	2277	27	67	0	0	A_64_P048712	A_64_P048712	2118	377.071	8.353813e+001	9.117274e+000	132.5	36	8.544179e+000	0	0	0	0	0	0	71.6965	1	1	46.8651	34.3243
DATA	2278	27	68	0	0	A_64_P012813	NM_001106456	2143	376.545	1.637039e+001	4.018028e+000	75	30	8.303650e+000	0	0	0	0	0	0	13.9839	1	0	55.8519	30.2188
DATA	2280	27	70	0	0	A_42_P598602	NM_001077646	2193.58	376.573	6.560502e+001	7.533235e+000	114.5	31	7.118451e+000	0	0	0	0	0	0	55.5385	1	1	57.5363	31.7879
DATA	2281	27	71	0	0	A_44_P375380	NM_001191572	2219.19	376.662	1.224148e+002	1.279390e+001	158	28	6.973997e+000	0	0	0	0	0	0	103.179	1	1	46.5243	28.4054
DATA	2282	27	72	0	0	A_64_P113555	NM_001000025	2244.46	376.93	1.635878e+001	4.076900e+000	73	29	7.546735e+000	0	0	0	0	0	0	13.7312	1	0	42.9674	28.1034
DATA	2283	27	73	0	0	A_42_P590466	NM_001009676	2269.85	376.712	3.898836e+003	3.899017e+002	3281	26	7.353236e+000	0	0	0	0	0	0	3259.1	1	1	48.2044	27.1515
DATA	2284	27	74	0	0	A_44_P224987	XM_001058317	2295.5	376.648	4.722468e+001	6.039450e+000	98	29	5.793448e+000	0	0	0	0	0	0	39.3189	1	1	57.5363	28.7241
DATA	2285	27	75	0	0	A_42_P557315	NM_001106280	2320.63	377.265	5.971870e+003	5.971989e+002	4815	29.5	6.663491e+000	0	0	0	0	0	0	4954.32	1	1	46.5243	29.4286
DATA	2286	27	76	0	0	A_44_P375364	A_44_P375364	2346.42	376.573	8.560466e+001	9.363000e+000	130.5	29.5	6.748993e+000	0	0	0	0	0	0	70.7492	1	1	57.5363	30.375
DATA	2287	27	77	0	0	A_44_P880152	NM_031553	2371.5	376.648	1.570479e+002	1.615924e+001	188	28.5	6.969567e+000	0	0	0	0	0	0	129.362	1	1	57.5363	29.9706
DATA	2288	27	78	0	0	A_64_P057575	NM_001191967	2396.95	376.909	1.555712e+002	1.601861e+001	185.5	28	8.896764e+000	0	0	0	0	0	0	127.744	1	1	47.8731	27.6176
DATA	2289	27	79	0	0	A_64_P122183	ENSRNOT00000009823	2422.2	377.115	6.560508e+001	7.595872e+000	111	31.5	7.056226e+000	0	0	0	0	0	0	53.7133	1	1	44.7812	30.125
DATA	2290	27	80	0	0	A_64_P057587	NM_019313	2447.79	376.97	7.352070e+001	8.294120e+000	118	28.5	6.445949e+000	0	0	0	0	0	0	60.0254	1	1	45.835	28.0714
DATA	2291	27	81	0	0	A_42_P480769	XM_001081609	2472.78	377	4.991577e+002	5.006392e+001	450	30	8.860470e+000	0	0	0	0	0	0	406.531	1	1	46.1809	32.2857
DATA	2292	27	82	0	0	A_42_P623151	NM_031026	2498.38	377	2.489518e+004	2.489521e+003	18919	29	9.174095e+000	0	0	0	0	0	0	20229.4	1	1	48.5334	30.3571
DATA	2293	27	83	0	0	A_42_P550241	NM_022954	2523.91	376.935	2.232435e+001	4.463600e+000	76.5	36	3.415317e+001	0	0	1	0	0	0	18.1039	1	1	54.4085	48.1481
DATA	2294	27	84	66	1	DarkCorner	DarkCorner	2549.5	377	3.884599e+000	3.871814e+000	56	30	9.798056e+000	0	0	0	0	0	0	-1.31747	0	0	54.1152	29.2424
DATA	2295	27	85	66	1	DarkCorner	DarkCorner	2574.97	377.194	3.889916e+000	3.877113e+000	52.5	30	8.057057e+000	0	0	0	0	0	0	-4.88799	0	0	46.8651	29.3556
DATA	2296	28	1	66	1	DarkCorner	DarkCorner	454.519	382.974	3.490819e+000	3.480565e+000	62	33	7.940653e+000	0	0	0	0	0	0	0.835125	0	0	49.5074	32.5556
DATA	2297	28	2	0	0	A_42_P802550	NM_017365	479.582	383.427	3.933676e+002	3.948783e+001	417	32	9.286364e+000	0	0	0	0	0	0	357.308	1	1	57.5363	31.3548
DATA	2299	28	4	0	0	A_42_P619926	NM_001106578	529.986	383.338	1.627310e+002	1.662420e+001	212	30.5	8.382332e+000	0	0	0	0	0	0	150.087	1	1	47.2035	30.2778
DATA	2300	28	5	0	0	A_64_P052441	ENSRNOT00000004876	556	383.455	5.508234e+001	6.459365e+000	118.5	30	9.166343e+000	0	0	0	0	0	0	51.1747	1	1	55.8519	31.0857
DATA	2301	28	6	0	0	A_64_P056823	CA510211	581.418	383.427	2.144929e+001	3.978857e+000	83.5	33	6.309154e+000	0	0	0	0	0	0	20.0622	1	1	57.5363	32.3448
DATA	2302	28	7	0	0	A_42_P669870	NM_001011919	606.662	383.122	3.644825e+003	3.644977e+002	3501	33	8.514693e+000	0	0	0	0	0	0	3430.59	1	1	48.8603	32.8
DATA	2303	28	8	0	0	A_42_P683634	NM_012946	632.333	383.5	5.640375e+004	5.640376e+003	52831.5	32.5	1.288590e+001	0	0	0	0	0	0	53412.3	1	1	57.5363	35.75
DATA	2304	28	9	0	0	A_42_P542809	NM_021671	657.147	383.309	4.857081e+002	4.868224e+001	507	31.5	6.876503e+000	0	0	0	0	0	0	462.465	1	1	45.835	31.4375
DATA	2305	28	10	0	0	A_64_P065887	ENSRNOT00000024693	682.893	383.5	1.619533e+002	1.652305e+001	219	28	9.858660e+000	0	0	0	0	0	0	155.028	1	1	56.9804	30.5455
DATA	2306	28	11	0	0	A_64_P043406	NM_001024902	708.189	383.392	1.321644e+003	1.322045e+002	1292.5	29.5	8.566246e+000	0	0	0	0	0	0	1271.28	1	1	49.1849	30.2059
DATA	2307	28	12	0	0	A_64_P060769	NM_001191090	733.789	383.105	1.381853e+003	1.382233e+002	1456	29	8.798997e+000	0	0	0	0	0	0	1335.23	1	1	42.5954	31.8788
DATA	2308	28	13	0	0	A_64_P150789	A_64_P150789	759.292	382.969	2.047451e+001	3.824625e+000	86	33.5	7.385314e+000	0	0	0	0	0	0	19.8664	1	1	45.4864	33.1667
DATA	2309	28	14	0	0	A_64_P110254	NM_022404	784.397	383.192	8.352246e+003	8.352308e+002	8020.5	33	8.681306e+000	0	0	0	0	0	0	8135.03	1	1	48.2044	34.5714
DATA	2310	28	15	0	0	A_42_P700753	FQ212883	809.689	383.338	2.101363e+003	2.101608e+002	2043.5	33	6.256032e+000	0	0	0	0	0	0	2053.85	1	1	48.5334	31.069
DATA	2311	28	16	0	0	A_42_P503768	NM_001009466	835.232	383.203	3.644428e+002	3.658423e+001	419	34	1.038448e+001	0	0	0	0	0	0	357.325	1	1	46.1809	35.1379
DATA	2312	28	17	0	0	A_64_P106021	ENSRNOT00000017892	860.582	383.427	1.253764e+002	1.293659e+001	184.5	34	1.024302e+001	0	0	0	0	0	0	123.275	1	1	57.5363	34.6667
DATA	2313	28	18	0	0	A_43_P10861	NM_001024879	886.107	383.5	2.691132e+002	2.709854e+001	329	27.5	7.833249e+000	0	0	0	0	0	0	265.265	1	1	56.9804	29.2143
DATA	2314	28	19	0	0	A_44_P562251	BF545174	911.093	383.68	1.112596e+002	1.156962e+001	170	32	6.601004e+000	0	0	0	0	0	0	109.903	1	1	48.8603	33.3158
DATA	2315	28	20	0	0	A_42_P608768	ENSRNOT00000009898	936.42	383.87	1.740136e+002	1.768725e+001	236.5	34.5	7.778952e+000	0	0	0	1	0	0	172.212	1	1	47.2035	33.4375
DATA	2316	28	21	0	0	A_64_P117115	NM_001109329	962.333	383.5	2.619850e+001	4.106671e+000	89.5	28.5	8.209776e+000	0	0	0	0	0	0	25.9668	1	1	57.5363	30.2895
DATA	2317	28	22	0	0	A_64_P043331	ENSRNOT00000032411	987.5	383.5	1.692963e+002	1.722177e+001	229.5	35	1.142651e+001	0	0	0	0	0	0	168.002	1	1	57.5363	34.7391
DATA	2318	28	23	0	0	A_42_P664274	NM_001079705	1013.11	383.5	1.674671e+003	1.674969e+002	1700.5	37	1.209678e+001	0	0	0	0	0	0	1663.41	1	1	56.9804	38.5357
DATA	2319	28	24	0	0	A_64_P044593	NM_001173451	1038.12	383.418	5.271874e+002	5.281299e+001	588.5	30	7.345228e+000	0	0	0	0	0	0	523.963	1	1	46.1809	31.7857
DATA	2320	28	25	0	0	A_64_P006978	NM_001109371	1063.67	383.5	3.882832e+001	5.001576e+000	103	31.5	8.292519e+000	0	0	0	0	0	0	38.6043	1	1	57.5363	32.3929
DATA	2321	28	26	0	0	A_64_P119390	NM_001109519	1089.1	382.914	3.123129e+001	4.437715e+000	93.5	30	1.033389e+001	0	0	0	0	0	0	31.0511	1	1	46.8651	33.4516
DATA	2322	28	27	0	0	A_64_P034714	A_64_P034714	1114.58	383.573	5.965851e+001	6.747881e+000	122.5	30	7.407550e+000	0	0	0	0	0	0	59.3049	1	1	57.5363	29.5556
DATA	2323	28	28	0	0	A_44_P535959	NM_001107650	1139.7	383.507	2.964085e+002	2.980826e+001	345	34	1.036609e+001	0	0	0	0	0	0	294.508	1	1	46.8651	34.9259
DATA	2324	28	29	0	0	A_64_P286274	ENSRNOT00000055318	1165.42	383.573	1.842587e+002	1.869438e+001	245	37.5	1.062567e+001	0	0	0	0	0	0	182.939	1	1	57.5363	37.3571
DATA	2325	28	30	0	0	A_44_P333384	NM_001024788	1190.47	384.022	3.068773e+001	4.404956e+000	92	34	9.195874e+000	0	0	0	0	0	0	30.439	1	1	37.4241	34.4444
DATA	2326	28	31	0	0	A_42_P522194	NM_012914	1216.05	383.527	1.433907e+002	1.468406e+001	206.5	32	7.700949e+000	0	0	0	0	0	0	142.041	1	1	48.5334	31.7692
DATA	2327	28	32	0	0	A_44_P273859	NM_017021	1241.58	383.573	1.837024e+001	3.662987e+000	77.5	34	8.280045e+000	0	0	0	0	0	0	18.17	1	1	57.5363	34.6774
DATA	2328	28	33	0	0	A_43_P11665	NM_013024	1267	383.545	6.322524e+001	7.074758e+000	125	35	8.529139e+000	0	0	0	0	0	0	62.427	1	1	55.8519	34.9394
DATA	2329	28	34	0	0	A_64_P118273	NM_001170593	1292.46	384.143	6.299670e+001	7.057072e+000	127	35	8.024597e+000	0	0	0	0	0	0	62.0828	1	1	44.0646	34.8438
DATA	2330	28	35	0	0	A_42_P762814	NM_031318	1317.31	383.611	4.530367e+003	4.530479e+002	4263	36	8.459233e+000	0	0	0	0	0	0	4454.84	1	1	48.2044	36.4
DATA	2331	28	36	0	0	A_44_P384017	NM_031688	1342.87	383.934	4.048708e+002	4.061297e+001	465	32.5	6.160045e+000	0	0	0	0	0	0	397.175	1	1	45.1352	33.1154
DATA	2332	28	37	0	0	A_64_P118872	A_64_P118872	1368.63	383.513	1.728140e+001	3.640200e+000	80	32	9.300002e+000	0	0	0	0	0	0	16.9073	1	1	49.8279	32.5185
DATA	2333	28	38	0	0	A_42_P599210	NM_001008326	1393.5	383.5	1.149674e+003	1.150123e+002	1195	32	1.004046e+001	0	0	0	0	0	0	1121.7	1	1	46.5243	33.4595
DATA	2334	28	39	0	0	A_44_P305801	NM_001033894	1419.03	383.353	4.048777e+003	4.048905e+002	3841	33.5	9.161631e+000	0	0	0	0	0	0	3938.31	1	1	46.1809	34.5
DATA	2335	28	40	0	0	A_64_P085462	A_64_P085462	1444.58	383.573	5.915950e+004	5.915951e+003	57675	38.5	1.214131e+001	0	0	0	0	0	0	57363	1	1	57.5363	38.3214
DATA	2336	28	41	0	0	A_42_P488000	NM_001108479	1469.83	383.7	1.671141e+003	1.671455e+002	1665	34	9.518181e+000	0	0	0	0	0	0	1615.02	1	1	47.2035	35.7188
DATA	2337	28	42	0	0	A_42_P818546	NM_001191600	1495.16	383.882	7.528564e+002	7.535597e+001	778.5	31	8.223626e+000	0	0	0	0	0	0	725.04	1	1	46.5243	32.2813
DATA	2338	28	43	0	0	A_44_P488489	TC610872	1520.54	383.824	1.500192e+003	1.500547e+002	1447.5	33	8.931362e+000	0	0	0	0	0	0	1439.45	1	1	48.8603	33
DATA	2339	28	44	0	0	A_64_P153971	A_64_P153971	1546.42	383.573	9.576211e+000	3.416601e+000	71.5	31	7.619912e+000	0	0	0	0	0	0	9.15235	1	0	57.5363	32.2162
DATA	2340	28	45	0	0	A_64_P077985	NM_001170478	1571.5	384	4.058997e+001	5.226386e+000	101	32	7.778048e+000	0	0	0	0	0	0	38.6436	1	1	54.1152	32.9565
DATA	2341	28	46	0	0	A_44_P576822	NM_080771	1596.38	383.836	1.087080e+003	1.087583e+002	1059	33.5	5.147666e+000	0	0	0	0	0	0	1030.78	1	1	43.7019	33.4615
DATA	2342	28	47	0	0	A_64_P134310	A_64_P134310	1622.32	383.952	8.330228e+001	8.967435e+000	142.5	33	3.526168e+000	0	0	0	0	0	0	78.6484	1	1	44.4243	32.7143
DATA	2343	28	48	0	0	A_64_P134706	NM_001107533	1647.48	383.884	4.353732e+001	5.483860e+000	103	33	6.027714e+000	0	0	0	0	0	0	40.928	1	1	47.5395	32.4444
DATA	2344	28	49	0	0	A_42_P469751	XM_001054007	1672.7	383.971	2.139677e+003	2.139939e+002	1998	33	9.035269e+000	0	0	0	0	0	0	2002.59	1	1	46.1809	33.9063
DATA	2345	28	50	0	0	A_64_P082653	ENSRNOT00000020906	1698.47	384.082	7.497959e+001	8.218228e+000	131	33	1.007257e+001	0	0	0	0	0	0	69.8536	1	1	48.5334	34.04
DATA	2346	28	51	0	0	A_43_P18902	NM_001109221	1723.65	384.056	1.514737e+002	1.551991e+001	207	34	7.482986e+000	0	0	0	0	0	0	140.47	1	1	47.5395	34.069
DATA	2347	28	52	0	0	A_64_P086719	ENSRNOT00000065918	1749.5	384	2.762665e+001	4.378058e+000	85	30	7.320743e+000	0	0	0	0	0	0	25.4968	1	1	54.1152	30.6286
DATA	2348	28	53	0	0	A_64_P138585	TC587165	1774.44	383.868	3.604747e+003	3.604909e+002	3188	36.5	1.504197e+001	0	0	0	0	0	0	3311.16	1	1	46.8651	40.5
DATA	2349	28	54	0	0	A_64_P230444	ENSRNOT00000010282	1800.19	383.975	4.788634e+003	4.788757e+002	4399	31.5	9.690854e+000	0	0	0	0	0	0	4377.13	1	1	49.1849	33.8667
DATA	2350	28	55	0	0	A_64_P124427	TC642834	1825.64	384	7.861775e+001	8.583858e+000	134	28	7.993632e+000	0	0	0	0	0	0	71.5103	1	1	45.4864	29.25
DATA	2351	28	56	0	0	A_42_P778587	NM_001135767	1850.76	383.971	3.026451e+002	3.046199e+001	334	27	9.999471e+000	0	0	0	0	0	0	273.941	1	1	46.1809	30.7143
DATA	2352	28	57	0	0	A_42_P526030	NM_057197	1876.28	384.095	6.406665e+003	6.406760e+002	5600	30	4.778147e+000	0	0	0	1	0	0	5770.28	1	1	48.8603	29.6429
DATA	2353	28	58	0	0	A_64_P022561	XM_001070923	1901.66	384.206	8.078238e+001	8.802866e+000	134	28.5	5.770364e+000	0	0	0	0	0	0	72.3978	1	1	46.5243	28.5833
DATA	2354	28	59	0	0	A_64_P126226	NM_001105901	1927.5	384	1.805706e+002	1.839609e+001	224	33	6.644009e+000	0	0	0	0	0	0	161.002	1	1	54.1152	32
DATA	2355	28	60	0	0	A_64_P089541	NM_001106214	1952.5	384	1.745908e+002	1.781292e+001	215	35	1.008101e+001	0	0	0	0	0	0	154.906	1	1	54.1152	38.72
DATA	2356	28	61	0	0	A_44_P205869	NM_138891	1977.75	383.901	8.627303e+002	8.634605e+001	780	30	8.176547e+000	0	0	0	0	0	0	761.66	1	1	47.5395	30.5484
DATA	2357	28	62	0	0	A_44_P491796	NM_012881	2003.5	384	8.288720e+001	9.024164e+000	133	31.5	1.256720e+001	0	0	0	0	0	0	72.8106	1	1	54.1152	33.4688
DATA	2358	28	63	0	0	A_64_P132706	NM_001008304	2028.5	384	5.609070e+004	5.609071e+003	47725.5	37	1.102872e+001	0	0	0	0	0	0	49033.1	1	1	54.1152	36.8485
DATA	2359	28	64	0	0	A_64_P040715	NM_001011979	2054.03	384.044	1.220456e+003	1.220987e+002	1097	36	1.043910e+001	0	0	0	0	0	0	1061.67	1	1	46.8651	34.7143
DATA	2360	28	65	0	0	A_44_P191055	NM_001107693	2079.27	384.219	2.449938e+003	2.450205e+002	2118	31	7.948578e+000	0	0	0	0	0	0	2121.04	1	1	48.2044	31.0714
DATA	2361	28	66	0	0	A_64_P077493	XR_005942	2104.81	384.052	2.263213e+001	4.284579e+000	82.5	34	8.953752e+000	0	0	0	0	0	0	19.4994	1	1	49.1849	34.3243
DATA	2362	28	67	0	0	A_44_P317600	NM_012612	2130	384.203	4.888764e+002	4.902407e+001	473	28	8.731772e+000	0	0	0	0	0	0	419.263	1	1	46.8651	29.6207
DATA	2363	28	68	0	0	A_42_P751368	NM_001047874	2155.47	384.25	2.001719e+003	2.002056e+002	1694	30.5	1.032219e+001	0	0	0	0	0	0	1708.79	1	1	47.5395	31.5
DATA	2364	28	69	0	0	A_42_P711568	NM_001107584	2180.85	383.903	1.072402e+004	1.072408e+003	8700	31	7.422563e+000	0	0	0	0	0	0	9112.87	1	1	46.8651	32.1389
DATA	2365	28	70	0	0	A_64_P091817	A_64_P091817	2206.62	384.213	1.016518e+003	1.017193e+002	918	31	8.138479e+000	0	0	0	0	0	0	860.011	1	1	52.0157	30.2121
DATA	2366	28	71	0	0	A_64_P006628	NM_172328	2232.07	383.885	8.108019e+001	8.921117e+000	127	26	7.166679e+000	0	0	0	0	0	0	68.2989	1	1	45.1352	27.8065
DATA	2367	28	72	0	0	A_64_P057760	NM_001191643	2257.42	384.427	2.591936e+002	2.618724e+001	277	26	7.622504e+000	0	0	0	0	0	0	217.461	1	1	57.5363	28.1111
DATA	2368	28	73	0	0	A_44_P150013	NM_001134495	2282.58	384.427	3.763220e+000	3.753412e+000	60	31	6.359245e+000	0	0	0	0	0	0	1.16242	0	0	57.5363	30.76
DATA	2369	28	74	0	0	A_44_P526975	NM_001002822	2307.87	384.304	2.790879e+002	2.816163e+001	289	28	7.243138e+000	0	0	0	0	0	0	232.333	1	1	46.1809	29.0345
DATA	2370	28	75	66	-1	(-)3xSLv1	NegativeControl	2333.5	384.352	3.791665e+000	3.779186e+000	57	31.5	7.301001e+000	0	0	0	0	0	0	-2.63514	0	0	57.5363	30.7692
DATA	2371	28	76	0	0	A_42_P648937	NM_001191732	2358.61	384.278	1.332800e+003	1.333340e+002	1137	31	7.547877e+000	0	0	0	0	0	0	1101.62	1	1	48.5334	31.4483
DATA	2372	28	77	0	0	A_44_P533786	NM_053749	2384.42	384.427	5.534561e+001	6.716251e+000	103	28	7.092863e+000	0	0	0	0	0	0	45.5948	1	1	57.5363	28.9394
DATA	2373	28	78	0	0	A_64_P156165	S68987	2409.2	384.169	4.941374e+003	4.941522e+002	4011	31	9.138103e+000	0	0	0	0	0	0	4058.36	1	1	47.5395	30.8276
DATA	2374	28	79	0	0	A_64_P084293	NM_001000525	2435.03	384.492	3.209318e+001	4.994795e+000	83.5	28.5	6.763446e+000	0	0	0	0	0	0	26.2837	1	1	44.4243	28.2059
DATA	2375	28	80	0	0	A_42_P708569	NM_001191837	2460.27	383.932	7.875191e+003	7.875285e+002	6376.5	29.5	5.532144e+000	0	0	0	0	0	0	6432.01	1	1	43.7019	29.2692
DATA	2376	28	81	0	0	A_64_P112215	NM_001110141	2485.67	384.5	3.512681e+002	3.533678e+001	333.5	30	9.814955e+000	0	0	0	0	0	0	286.253	1	1	57.5363	31
DATA	2377	28	82	0	0	A_42_P567793	NM_001107668	2510.92	384.392	2.666212e+003	2.666490e+002	2103.5	37	2.767162e+001	0	0	0	0	0	0	2168.11	1	1	48.8603	44.9615
DATA	2378	28	83	0	0	A_42_P481087	XM_232226	2536.44	384.507	1.356818e+003	1.357368e+002	1159	33	1.039744e+001	0	0	0	0	0	0	1101.33	1	1	49.1849	32.24
DATA	2379	28	84	66	1	DarkCorner	DarkCorner	2562.31	384.678	3.880378e+000	3.867607e+000	52	30.5	1.188808e+001	0	0	0	0	0	0	-5.74759	0	0	52.3208	31.3947
DATA	2380	28	85	66	1	DarkCorner	DarkCorner	2587.65	384.319	4.476881e+000	3.898562e+000	61	26	7.126223e+000	0	0	0	0	0	0	3.62343	1	0	48.2044	26.134
DATA	2381	29	1	66	1	DarkCorner	DarkCorner	441.737	390.289	4.305613e+000	3.517423e+000	66	29	6.986399e+000	0	0	0	0	0	0	3.86594	1	0	49.5074	29.611
DATA	2382	29	2	66	1	DarkCorner	DarkCorner	467.107	390.5	3.472990e+000	3.461559e+000	59.5	32	8.039772e+000	0	0	0	0	0	0	-2.69634	0	0	56.9804	31.069
DATA	2383	29	3	0	0	A_64_P096512	NM_031782	492.28	390.84	1.761211e+004	1.761214e+003	15265	34	6.761716e+000	0	0	0	0	0	0	16076.5	1	1	49.1849	33.4815
DATA	2384	29	4	0	0	A_44_P172814	NM_173102	517.76	390.667	2.921027e+004	2.921029e+003	26965.5	31	8.859745e+000	0	0	0	0	0	0	26868.6	1	1	49.1849	32.069
DATA	2385	29	5	0	0	A_42_P788040	NM_001025053	543.298	390.224	1.277792e+002	1.321817e+001	179	30	6.816591e+000	0	0	0	0	0	0	118.393	1	1	45.835	30.1818
DATA	2386	29	6	0	0	A_42_P808945	NM_181368	568.62	390.38	1.157326e+003	1.157813e+002	1110.5	30	7.952034e+000	0	0	0	0	0	0	1079.73	1	1	47.8731	32.1212
DATA	2387	29	7	0	0	A_64_P162713	A_64_P162713	594.107	390.5	1.617215e+001	3.708967e+000	75	33.5	7.933343e+000	0	0	0	0	0	0	15.187	1	0	56.9804	32.6
DATA	2388	29	8	0	0	A_44_P501204	NM_017361	619.5	390.5	2.448084e+002	2.470459e+001	287	31.5	7.667591e+000	0	0	0	0	0	0	231.311	1	1	57.5363	31.9667
DATA	2389	29	9	0	0	A_42_P785926	NM_001108289	644.526	390.579	1.071464e+003	1.071971e+002	1093	32	7.329619e+000	0	0	0	0	0	0	1018.18	1	1	49.8279	32.2174
DATA	2390	29	10	0	0	A_42_P616287	NM_001134555	670.333	390.5	2.496630e+002	2.518090e+001	302	28	6.392171e+000	0	0	0	0	0	0	238.551	1	1	57.5363	28.8788
DATA	2391	29	11	66	-1	(-)3xSLv1	NegativeControl	695.582	390.573	3.274837e+000	3.264059e+000	56	30	9.505897e+000	0	0	0	0	0	0	-6.57055	0	0	57.5363	31.1724
DATA	2392	29	12	0	0	A_43_P12365	NM_023101	721	390.545	5.040949e+001	5.997152e+000	110.5	29	8.644520e+000	0	0	0	0	0	0	48.6359	1	1	55.8519	30.9143
DATA	2393	29	13	0	0	A_64_P076643	ENSRNOT00000057620	746.319	390.536	7.762126e+000	3.326616e+000	72	30.5	8.574001e+000	0	0	0	0	0	0	7.52145	1	0	46.8651	31.5278
DATA	2394	29	14	0	0	A_64_P074865	XR_008898	771.582	390.573	6.631347e+000	3.289511e+000	68.5	31	8.721238e+000	0	0	0	0	0	0	6.45128	1	0	57.5363	33.32
DATA	2395	29	15	0	0	A_64_P009582	XM_214287	797.133	390.614	2.540209e+004	2.540211e+003	24547	36.5	9.237819e+000	0	0	0	0	0	0	24803.2	1	1	51.4001	37.6786
DATA	2396	29	16	0	0	A_44_P527270	NM_020073	822.527	390.649	9.044961e+001	9.594200e+000	152	34	7.630535e+000	0	0	0	0	0	0	88.6094	1	1	48.8603	32.0741
DATA	2397	29	17	0	0	A_44_P530813	NM_012922	847.937	391.175	5.362536e+002	5.372015e+001	584	34	1.006665e+001	0	0	0	0	0	0	526.931	1	1	45.4864	36.8621
DATA	2398	29	18	0	0	A_64_P078210	NM_001044303	873.418	390.573	3.898319e+001	5.031903e+000	102.5	28	1.080469e+001	0	0	0	0	0	0	38.4049	1	1	57.5363	31.2069
DATA	2399	29	19	0	0	A_42_P764985	NM_133402	898.227	391.273	7.491957e+003	7.492024e+002	7190.5	32	4.323554e+000	0	0	0	0	0	0	7398.01	1	1	45.4864	31.2143
DATA	2400	29	20	0	0	A_43_P23097	NM_001011965	923.851	391.068	3.980693e+001	5.087420e+000	103	32.5	6.848593e+000	0	0	0	0	0	0	39.3864	1	1	47.5395	32.25
DATA	2401	29	21	0	0	A_43_P19450	NM_001105713	949.391	390.594	1.822821e+002	1.850055e+001	243	31	7.986662e+000	0	0	0	0	0	0	180.655	1	1	47.5395	31.7179
DATA	2402	29	22	0	0	A_42_P514419	NM_001009599	974.753	390.644	1.424010e+003	1.424360e+002	1462	29	7.728529e+000	0	0	0	0	0	0	1413.24	1	1	48.5334	30.2143
DATA	2403	29	23	0	0	A_64_P123974	A_64_P123974	1000.42	390.573	1.694754e+001	3.581341e+000	79	37	1.032299e+001	0	0	0	0	0	0	16.8375	1	1	57.5363	37.1111
DATA	2404	29	24	0	0	A_64_P221399	NM_134415	1025.34	390.919	3.096228e+003	3.096388e+002	3131	31	7.527026e+000	0	0	0	0	0	0	3078.58	1	1	44.7812	31.7391
DATA	2405	29	25	0	0	A_44_P760124	A_44_P760124	1050.82	390.8	3.028969e+002	3.045314e+001	383	30	7.642569e+000	0	0	0	0	0	0	301.315	1	1	45.4864	30.8621
DATA	2406	29	26	0	0	A_42_P589551	NM_001037093	1076.21	390.875	3.783664e+003	3.783795e+002	3748.5	34	9.497489e+000	0	0	0	0	0	0	3764.7	1	1	47.5395	34.7333
DATA	2407	29	27	0	0	A_42_P645467	NM_001108804	1101.77	390.662	2.735563e+001	4.172460e+000	90	30	7.904736e+000	0	0	0	0	0	0	27.216	1	1	49.8279	30.2121
DATA	2408	29	28	0	0	A_64_P036006	A_64_P036006	1127.34	390.641	1.292379e+001	3.406370e+000	75.5	33	9.447222e+000	0	0	0	0	0	0	12.8533	1	0	45.1352	32
DATA	2409	29	29	0	0	A_64_P088575	NM_001106355	1152.59	390.719	3.745832e+002	3.759083e+001	440	36	9.987061e+000	0	0	0	0	0	0	372.315	1	1	45.1352	35.2069
DATA	2410	29	30	0	0	A_42_P798776	XM_002725203	1177.93	390.806	6.087424e+003	6.087506e+002	6037	34	9.771900e+000	0	0	0	0	0	0	6045.36	1	1	46.8651	35.4815
DATA	2411	29	31	0	0	A_64_P017424	XM_001067041	1203.5	391	4.922280e+000	3.197917e+000	67.5	32	7.052644e+000	0	0	0	0	0	0	4.88284	1	0	54.1152	31.1613
DATA	2412	29	32	0	0	A_64_P147358	NM_001105764	1228.46	390.942	1.829205e+003	1.829478e+002	1849	34	6.263120e+000	0	0	0	0	0	0	1812.1	1	1	47.5395	33.68
DATA	2413	29	33	0	0	A_42_P522285	NM_001044263	1254.17	391	4.548228e+002	4.559256e+001	490	33	9.178286e+000	0	0	0	0	0	0	449.841	1	1	46.8651	35.2188
DATA	2414	29	34	0	0	A_64_P130184	NM_017207	1279.7	390.9	3.170260e+003	3.170419e+002	3114	36	7.623617e+000	0	0	0	0	0	0	3129.71	1	1	47.2035	35.4667
DATA	2415	29	35	0	0	A_44_P167930	NM_012720	1305.12	391	2.309276e+003	2.309495e+002	2308	37	1.093454e+001	0	0	0	0	0	0	2275.06	1	1	49.8279	39.7778
DATA	2416	29	36	0	0	A_64_P135305	NM_001013426	1330.17	391	9.474524e+003	9.474577e+002	8955	34	7.324849e+000	0	0	0	0	0	0	9313.17	1	1	46.8651	33.8182
DATA	2417	29	37	0	0	A_64_P100182	NM_001077678	1355.61	390.931	1.549461e+001	3.552491e+000	79	32	8.706189e+000	0	0	0	0	0	0	15.1927	1	0	53.8203	35.5185
DATA	2418	29	38	0	0	A_44_P521699	NM_001007728	1381.09	390.896	2.688206e+002	2.707250e+001	319	32	6.465162e+000	0	0	0	0	0	0	262.871	1	1	46.8651	31.7143
DATA	2419	29	39	0	0	A_64_P053516	NM_001001280	1406.88	391.174	1.396609e+001	3.505000e+000	76	34	1.101122e+001	0	0	0	0	0	0	13.6175	1	0	46.8651	35.4
DATA	2420	29	40	0	0	A_64_P073183	XM_001061392	1431.94	390.913	6.108132e+003	6.108217e+002	5753	34	1.214126e+001	0	0	0	0	0	0	5937.45	1	1	46.8651	34.7778
DATA	2421	29	41	0	0	A_64_P067447	NM_001109440	1457.17	391	1.342848e+003	1.343238e+002	1375.5	34	8.972100e+000	0	0	0	0	0	0	1301.13	1	1	46.8651	34.963
DATA	2422	29	42	0	0	A_64_P089251	NM_001014109	1482.62	391.239	1.089326e+002	1.136660e+001	169	34	1.109241e+001	0	0	0	0	0	0	105.191	1	1	47.5395	39.1923
DATA	2423	29	43	0	0	A_64_P118192	NM_022797	1508.1	391	7.805729e+002	7.812524e+001	804	30	8.990471e+000	0	0	0	0	0	0	751.031	1	1	46.8651	32.3714
DATA	2424	29	44	0	0	A_64_P082584	ENSRNOT00000024258	1533.37	391.075	1.166107e+002	1.211085e+001	175	32	8.954184e+000	0	0	0	0	0	0	111.782	1	1	45.835	33.375
DATA	2425	29	45	0	0	A_42_P465677	NM_001106241	1559	391	2.517251e+002	2.538567e+001	310.5	31	7.099743e+000	0	0	0	0	0	0	240.355	1	1	46.8651	30.7778
DATA	2426	29	46	0	0	A_42_P781999	NM_001106378	1584.24	391	2.412241e+004	2.412243e+003	22087	36	1.221078e+001	0	0	0	0	0	0	22941	1	1	46.8651	38.6452
DATA	2427	29	47	0	0	A_44_P991472	NM_134374	1609.37	391	1.237074e+003	1.237516e+002	1169.5	33	4.036754e+000	0	0	0	0	0	0	1171.67	1	1	46.5243	33.1538
DATA	2428	29	48	0	0	A_42_P767737	AY724480	1635.09	391.104	5.104917e+003	5.105025e+002	4601	33	5.214723e+000	0	0	0	0	0	0	4814.23	1	1	46.8651	33.12
DATA	2429	29	49	0	0	A_42_P648200	NM_001037356	1660.36	391.174	1.750964e+002	1.782502e+001	230	31	6.314451e+000	0	0	0	0	0	0	164.41	1	1	46.8651	31.4091
DATA	2430	29	50	0	0	A_64_P006062	NM_001191695	1685.91	391.065	1.622123e+002	1.656422e+001	215	31	9.846128e+000	0	0	0	0	0	0	151.624	1	1	54.4085	33.7097
DATA	2431	29	51	0	0	A_42_P728230	NM_001037782	1711.09	391.104	4.874993e+003	4.875109e+002	4491	35	8.553668e+000	0	0	0	0	0	0	4536.2	1	1	46.8651	34.3704
DATA	2432	29	52	0	0	A_64_P106011	A_64_P106011	1736.5	391	6.074143e+000	3.438462e+000	66	29	6.404111e+000	0	0	0	0	0	0	5.62564	1	0	54.1152	30.5667
DATA	2433	29	53	0	0	A_42_P622661	NM_001024292	1761.94	391.116	2.139057e+003	2.139327e+002	1962.5	31.5	8.938576e+000	0	0	0	0	0	0	1971.78	1	1	46.8651	32.25
DATA	2434	29	54	0	0	A_42_P619844	NM_001030037	1787.41	391.253	6.597168e+003	6.597257e+002	5992	40	1.293475e+001	0	0	0	1	0	0	6052.22	1	1	50.7771	42
DATA	2436	29	56	0	0	A_64_P128260	XM_001056985	1838.06	391.045	1.026083e+003	1.026663e+002	1001	29	7.592583e+000	0	0	0	0	0	0	932.187	1	1	46.8651	31.7742
DATA	2437	29	57	0	0	A_44_P1034950	NM_053294	1863.42	391.342	4.539589e+002	4.552810e+001	466	33	1.019263e+001	0	0	0	0	0	0	410.412	1	1	48.5334	33.2
DATA	2438	29	58	0	0	A_64_P080316	NM_139113	1889.14	391.407	2.578528e+002	2.601965e+001	292.5	30.5	5.613612e+000	0	0	0	0	0	0	231.953	1	1	56.9804	29.9333
DATA	2439	29	59	0	0	A_64_P053069	NM_001106820	1914.19	391.406	9.592472e+002	9.598861e+001	905.5	30	7.158439e+000	0	0	0	0	0	0	858.677	1	1	47.2035	30.0811
DATA	2440	29	60	0	0	A_42_P498066	NM_031136	1939.86	391.407	8.361110e+004	8.361111e+003	75294	33	8.699030e+000	0	0	0	0	0	0	74469.6	1	1	56.9804	33.8387
DATA	2441	29	61	0	0	A_44_P277068	ENSRNOT00000058491	1965.07	390.883	5.903311e+003	5.903416e+002	5311	32	7.478715e+000	0	0	0	0	0	0	5231.49	1	1	44.4243	32.2581
DATA	2442	29	62	0	0	A_44_P685613	XM_225679	1990.45	391.405	1.940320e+003	1.940645e+002	1717.5	27.5	7.959741e+000	0	0	0	0	0	0	1711.18	1	1	49.5074	28.5667
DATA	2443	29	63	0	0	A_64_P124364	ENSRNOT00000015807	2016	391.455	3.391896e+002	3.410651e+001	348	37	8.388621e+000	0	0	0	0	0	0	297.656	1	1	55.8519	38.1
DATA	2444	29	64	0	0	A_42_P466362	NM_017142	2041.06	391.303	1.327518e+003	1.328003e+002	1176	33	1.067787e+001	0	0	0	0	0	0	1159.32	1	1	45.835	32.4286
DATA	2445	29	65	0	0	A_64_P081517	ENSRNOT00000037639	2066.67	391.5	1.049629e+002	1.109866e+001	152.5	31	9.671988e+000	0	0	0	0	0	0	91.2211	1	1	57.5363	32.7879
DATA	2446	29	66	0	0	A_42_P629394	NM_031683	2091.93	391.583	3.087376e+003	3.087589e+002	2682	31	6.938505e+000	0	0	0	0	0	0	2670.48	1	1	48.2044	31.0714
DATA	2447	29	67	0	0	A_44_P500975	NM_001000833	2117.52	391.849	3.961462e+001	5.380441e+000	93	30	5.427080e+000	0	0	0	0	0	0	34.1049	1	1	47.8731	29.8966
DATA	2448	29	68	0	0	A_64_P165046	ENSRNOT00000015927	2143	391.455	9.171493e+001	9.874114e+000	134	29	8.527411e+000	0	0	0	0	0	0	78.5866	1	1	55.8519	28.8438
DATA	2449	29	69	0	0	A_44_P222865	XM_235305	2168.19	391.338	1.075436e+004	1.075443e+003	9116	31	8.301447e+000	0	0	0	0	0	0	9173.34	1	1	46.5243	33.1071
DATA	2451	29	71	0	0	A_64_P131688	XM_574187	2219.09	391.797	4.681412e+001	5.971214e+000	95.5	25.5	7.979084e+000	0	0	0	0	0	0	39.5871	1	1	46.5243	27.0294
DATA	2452	29	72	0	0	A_42_P556457	NM_001033931	2244.52	391.362	2.758658e+003	2.758909e+002	2314	33	7.833379e+000	0	0	0	0	0	0	2322.8	1	1	47.5395	30.8519
DATA	2453	29	73	0	0	A_42_P734384	NM_001108406	2269.63	391.36	2.717575e+003	2.717832e+002	2275.5	31	5.804596e+000	0	0	0	1	0	0	2279.06	1	1	48.8603	32.12
DATA	2454	29	74	0	0	A_42_P728032	XM_001066058	2294.94	391.464	1.689056e+003	1.689472e+002	1446	30	7.460921e+000	0	0	0	0	0	0	1411.04	1	1	47.5395	30.9643
DATA	2455	29	75	0	0	A_64_P151525	A_64_P151525	2320.58	391.74	7.118769e+001	8.053550e+000	118.5	30	6.678669e+000	0	0	0	0	0	0	59.2503	1	1	48.5334	29.2692
DATA	2456	29	76	0	0	A_43_P19276	ENSRNOT00000039523	2346.06	391.611	7.174008e+002	7.183957e+001	640.5	29.5	8.209947e+000	0	0	0	0	0	0	594.956	1	1	48.2044	30.625
DATA	2457	29	77	0	0	A_44_P529811	NM_001107657	2371.27	391.818	3.395933e+001	5.090400e+000	88	29	7.330742e+000	0	0	0	0	0	0	28.0704	1	1	45.835	30.1613
DATA	2458	29	78	0	0	A_64_P104640	A_64_P104640	2396.81	391.643	3.139425e+004	3.139428e+003	26166	28	6.877895e+000	0	0	0	0	0	0	25866.6	1	1	51.4001	28.7188
DATA	2459	29	79	0	0	A_64_P003234	NM_001109048	2422.5	391.5	3.104174e+001	4.918994e+000	86	31	5.172685e+000	0	0	0	0	0	0	25.499	1	1	57.5363	30.44
DATA	2460	29	80	0	0	A_64_P097158	NM_001000875	2447.67	391.5	2.417604e+001	4.525962e+000	79.5	28	6.730041e+000	0	0	0	0	0	0	19.8056	1	1	57.5363	28.2963
DATA	2461	29	81	0	0	A_64_P141814	NM_001134629	2473.63	391.908	2.053700e+002	2.089210e+001	230	30	9.910856e+000	0	0	0	0	0	0	167.833	1	1	49.1849	31.9259
DATA	2462	29	82	0	0	A_42_P463602	NM_001107592	2498.5	391.5	1.560551e+001	4.148972e+000	74	27.5	8.301671e+000	0	0	0	0	0	0	12.7241	1	0	57.5363	28.8182
DATA	2463	29	83	0	0	A_64_P083366	NM_001077643	2523.65	392.016	1.724312e+004	1.724316e+003	13926	34	9.852444e+000	0	0	0	0	0	0	14033.6	1	1	44.0646	33.125
DATA	2464	29	84	0	0	A_44_P121039	NM_172008	2549.08	392.048	3.053581e+002	3.077855e+001	302	32	1.106282e+001	0	0	0	0	0	0	248.102	1	1	45.1352	33.0882
DATA	2465	29	85	66	1	DarkCorner	DarkCorner	2575.05	391.12	3.876996e+000	3.864236e+000	53	28.5	8.498643e+000	0	0	0	0	0	0	-2.91595	0	0	47.8731	28.24
DATA	2466	30	1	66	1	DarkCorner	DarkCorner	454.385	397.949	3.484156e+000	3.473689e+000	64.5	32	8.845283e+000	0	0	0	0	0	0	0.752373	0	0	49.1849	31.2439
DATA	2467	30	2	0	0	A_42_P687443	NM_020100	479.843	397.9	1.871035e+002	1.902472e+001	235	34.5	9.136241e+000	0	0	0	0	0	0	170.277	1	1	46.8651	33.2857
DATA	2468	30	3	0	0	A_42_P563382	ENSRNOT00000055321	505	397.797	2.785401e+003	2.785611e+002	2624	35	8.261814e+000	0	0	0	0	0	0	2554.6	1	1	46.8651	34.5152
DATA	2469	30	4	0	0	A_42_P667100	NM_001013932	530.5	398	1.633450e+003	1.633802e+002	1558	30.5	7.764183e+000	0	0	0	0	0	0	1509.37	1	1	48.5334	31.9444
DATA	2470	30	5	0	0	A_42_P553319	TC597248	556	398	1.441609e+002	1.480434e+001	200	30	6.790750e+000	0	0	0	0	0	0	134.158	1	1	54.9904	30.9429
DATA	2471	30	6	0	0	A_64_P151358	NM_181695	581.5	398	2.820378e+001	4.375856e+000	87	29	8.538540e+000	0	0	0	0	0	0	26.4235	1	1	54.1152	28.64
DATA	2472	30	7	0	0	A_44_P196743	ENSRNOT00000007795	606.5	398	3.335951e+000	3.324972e+000	62	29.5	6.388647e+000	0	0	0	0	0	0	-0.940851	0	0	54.1152	31
DATA	2474	30	9	0	0	A_64_P127111	NM_001106004	657.31	398.014	1.196311e+004	1.196316e+003	11337	30.5	7.526298e+000	0	0	0	0	0	0	11408.4	1	1	47.2035	31.5
DATA	2475	30	10	0	0	A_42_P470775	NM_001025126	682.757	398	2.153912e+003	2.154160e+002	2104	30	8.383357e+000	0	0	0	0	0	0	2064.79	1	1	46.8651	30.8857
DATA	2476	30	11	0	0	A_44_P472855	NM_001000961	708.437	397.944	1.264923e+002	1.306102e+001	183	30	8.836435e+000	0	0	0	0	0	0	121.854	1	1	48.2044	31.027
DATA	2477	30	12	0	0	A_64_P080682	NM_001109652	733.368	398.029	8.291134e+000	3.343859e+000	72.5	30	8.456775e+000	0	0	0	0	0	0	8.02252	1	0	46.1809	31.7273
DATA	2478	30	13	0	0	A_42_P727368	NM_001025693	758.925	397.851	9.066839e+001	9.623648e+000	150	31	8.225284e+000	0	0	0	0	0	0	88.0967	1	1	46.5243	32.697
DATA	2479	30	14	0	0	A_64_P034427	A_64_P034427	784.642	397.881	3.572433e+003	3.572578e+002	3639	36	9.949874e+000	0	0	0	0	0	0	3484.51	1	1	45.835	37
DATA	2480	30	15	0	0	A_64_P042871	A_64_P042871	809.608	398.069	5.936326e+002	5.944959e+001	664.5	33.5	9.173746e+000	0	0	0	0	0	0	581.007	1	1	53.8203	33.375
DATA	2481	30	16	0	0	A_64_P152617	NM_001105747	835.243	397.929	9.449715e+000	3.329463e+000	72	32	6.281842e+000	0	0	0	0	0	0	9.27787	1	0	46.5243	32.6667
DATA	2482	30	17	0	0	A_44_P468879	NM_001007798	860.451	398.296	2.792160e+001	4.234544e+000	88	34	1.033144e+001	0	0	0	0	0	0	27.491	1	1	47.2035	33.3636
DATA	2483	30	18	0	0	A_44_P252976	NM_001012071	886.093	398.065	1.339083e+002	1.376225e+001	198	32	1.022110e+001	0	0	0	0	0	0	132.17	1	1	54.4085	33.2143
DATA	2484	30	19	0	0	A_64_P014080	NM_022189	911.246	397.885	1.600087e+001	3.550045e+000	79	32	5.648232e+000	0	0	0	0	0	0	15.8266	1	1	44.7812	32.2571
DATA	2485	30	20	0	0	A_44_P204789	NM_001025684	936.6	398.357	5.945011e+002	5.953420e+001	649	33	7.984478e+000	0	0	0	0	0	0	589.134	1	1	47.2035	32.5758
DATA	2486	30	21	0	0	A_64_P030373	NM_001127319	962.418	398.427	4.295637e+001	5.331619e+000	107	30	6.613233e+000	0	0	0	0	0	0	42.6351	1	1	65	30.8788
DATA	2487	30	22	0	0	A_42_P558703	NM_001106810	987.354	397.8	6.572708e+002	6.580273e+001	718	34	8.913948e+000	0	0	0	0	0	0	653.103	1	1	45.4864	34.4615
DATA	2488	30	23	0	0	A_44_P241190	NM_001013199	1012.73	397.823	9.550565e+002	9.555763e+001	1003.5	36.5	7.313375e+000	0	0	0	0	0	0	949.884	1	1	44.7812	35.8214
DATA	2489	30	24	0	0	A_42_P539095	XM_001081794	1038.29	397.833	9.763722e+002	9.768801e+001	1035.5	30	7.779211e+000	0	0	0	0	0	0	971.709	1	1	45.835	31.25
DATA	2490	30	25	0	0	A_64_P010905	ENSRNOT00000057216	1063.51	397.871	1.259144e+002	1.297910e+001	190.5	34	8.055610e+000	0	0	0	0	0	0	125.357	1	1	47.8731	34.3214
DATA	2491	30	26	0	0	A_44_P500660	NM_001007645	1089.06	397.825	4.163061e+002	4.174948e+001	465	32	8.919569e+000	0	0	0	0	0	0	414.492	1	1	45.4864	32.6154
DATA	2492	30	27	0	0	A_64_P056436	A_64_P056436	1114.42	397.894	2.974979e+002	2.991597e+001	366	33	1.259032e+001	0	0	0	0	0	0	296.143	1	1	45.4864	36.25
DATA	2493	30	28	0	0	A_42_P773816	NM_017079	1139.91	397.894	1.291108e+002	1.328986e+001	194	37	1.012873e+001	0	0	0	0	0	0	128.462	1	1	46.1809	34.6552
DATA	2494	30	29	0	0	A_64_P138604	NM_001009967	1165.42	398.427	5.904909e+004	5.904910e+003	58504.5	37	1.031953e+001	0	0	0	0	0	0	58712.2	1	1	57.5363	36.2759
DATA	2495	30	30	0	0	A_42_P705302	NM_001107361	1190.37	397.735	7.039636e+003	7.039707e+002	6908	30.5	9.183346e+000	0	0	0	0	0	0	6992.22	1	1	46.5243	31.4231
DATA	2496	30	31	0	0	A_64_P027259	NM_001191656	1216.06	397.969	2.289682e+004	2.289684e+003	22664	31.5	8.022695e+000	0	0	0	0	0	0	22714.8	1	1	46.8651	32
DATA	2497	30	32	0	0	A_44_P288333	ENSRNOT00000006659	1241.65	397.933	2.907950e+002	2.925116e+001	366	33	7.536156e+000	0	0	0	0	0	0	288.053	1	1	43.7019	33.1429
DATA	2498	30	33	0	0	A_42_P618217	NM_130752	1267	398.455	7.565260e+001	8.202396e+000	136.5	36	1.000728e+001	0	0	0	0	0	0	74.8154	1	1	55.8519	36.4865
DATA	2499	30	34	0	0	A_64_P151587	A_64_P151587	1292.42	398.427	9.474312e+000	3.314038e+000	72	36	8.088933e+000	0	0	0	0	0	0	9.35129	1	0	57.5363	36.3913
DATA	2500	30	35	0	0	A_42_P771107	NM_001108217	1317.13	398.565	1.008841e+003	1.009343e+002	1012	34	8.695875e+000	0	0	0	0	0	0	993.672	1	1	47.2035	34.8148
DATA	2501	30	36	0	0	A_42_P689013	NM_053800	1342.75	398.235	1.828188e+004	1.828191e+003	17598	34	9.007285e+000	0	0	0	0	0	0	17963.4	1	1	46.1809	34.7419
DATA	2502	30	37	0	0	A_64_P155334	NM_001100945	1368.38	398	1.562248e+003	1.562576e+002	1557	32	7.699759e+000	0	0	0	0	0	0	1531.02	1	1	48.5334	33.9375
DATA	2503	30	38	0	0	A_64_P049007	A_64_P049007	1393.8	397.828	2.577394e+001	4.114641e+000	88.5	31.5	7.282671e+000	0	0	0	0	0	0	25.1882	1	1	45.4864	31.8611
DATA	2504	30	39	0	0	A_44_P351461	ENSRNOT00000027179	1419.42	398.427	4.439990e+001	5.482794e+000	104.5	31.5	8.652220e+000	0	0	0	0	0	0	43.2644	1	1	57.5363	32.9667
DATA	2505	30	40	0	0	A_44_P604267	NM_022933	1444.32	398.225	3.139654e+002	3.156192e+001	374	39	8.304720e+000	0	0	0	0	0	0	304.987	1	1	47.5395	37.8261
DATA	2506	30	41	0	0	A_64_P070475	XM_001061514	1470.11	398.5	3.248225e+000	3.243480e+000	65	34	7.998925e+000	0	0	0	0	0	0	1.90044	0	0	65	34.129
DATA	2507	30	42	0	0	A_64_P119963	A_64_P119963	1494.69	398.216	6.577158e+002	6.585176e+001	696	31	8.935342e+000	0	0	0	0	0	0	634.618	1	1	40.6843	33.4286
DATA	2508	30	43	0	0	A_42_P658562	NM_001134416	1520.89	398.5	3.733105e+002	3.747318e+001	410	33	8.688790e+000	0	0	0	0	0	0	358.863	1	1	56.9804	33.931
DATA	2509	30	44	0	0	A_64_P116830	A_64_P116830	1546.33	398.5	6.545211e+001	7.317982e+000	126	32	7.366903e+000	0	0	0	0	0	0	62.6807	1	1	57.5363	32.7333
DATA	2510	30	45	0	0	A_64_P048531	ENSRNOT00000019473	1571.5	398.5	1.191760e+002	1.236228e+001	180	35	8.666509e+000	0	0	0	0	0	0	113.686	1	1	57.5363	36.5862
DATA	2511	30	46	0	0	A_64_P122716	NM_139331	1597.11	398.5	7.708926e+000	3.388211e+000	69	35	7.094197e+000	0	0	0	0	0	0	7.32373	1	0	56.9804	35.5926
DATA	2512	30	47	0	0	A_64_P077323	NM_201992	1622.5	398.5	1.627906e+001	3.691521e+000	78	34	4.031924e+000	0	0	0	0	0	0	15.401	1	0	57.5363	34.4444
DATA	2513	30	48	0	0	A_42_P569711	NM_001108977	1647.42	398.183	2.603995e+002	2.625167e+001	303	32	7.917809e+000	0	0	0	0	0	0	245.305	1	1	47.5395	33.6522
DATA	2514	30	49	0	0	A_42_P474100	NM_001191820	1672.93	398.521	5.854630e+003	5.854725e+002	5271	34	9.817841e+000	0	0	0	0	0	0	5491.17	1	1	47.8731	34.84
DATA	2515	30	50	0	0	A_64_P026404	A_64_P026404	1698.58	398.573	1.217264e+001	3.571048e+000	74	30.5	9.217458e+000	0	0	0	0	0	0	11.3652	1	0	57.5363	33.8077
DATA	2516	30	51	0	0	A_64_P026581	ENSRNOT00000029099	1723.93	398.718	4.592466e+003	4.592590e+002	4268	30.5	7.833249e+000	0	0	0	0	0	0	4268.32	1	1	47.2035	32.2143
DATA	2517	30	52	0	0	A_64_P043624	NM_133565	1749.2	398.667	3.045165e+003	3.045354e+002	2859	30.5	7.797573e+000	0	0	0	0	0	0	2817.08	1	1	45.4864	31.4706
DATA	2518	30	53	0	0	A_44_P417429	NM_001011983	1774.48	398.362	2.798564e+003	2.798771e+002	2554	34	9.311641e+000	0	0	0	0	0	0	2576.64	1	1	47.5395	35.04
DATA	2519	30	54	0	0	A_64_P007574	ENSRNOT00000028681	1800.12	398.397	1.617976e+004	1.617979e+003	14555	31	1.022642e+001	0	0	0	0	0	0	14824.7	1	1	48.5334	33.5313
DATA	2520	30	55	0	0	A_42_P529690	NM_001173510	1825.44	398.479	2.530919e+004	2.530922e+003	22261	27	7.946951e+000	0	0	0	0	0	0	23078	1	1	48.2044	29.5333
DATA	2521	30	56	0	0	A_42_P505070	TC624062	1850.81	398.608	3.266852e+003	3.267034e+002	2880.5	28.5	9.242090e+000	0	0	0	1	0	0	2964.4	1	1	49.1849	30.9118
DATA	2522	30	57	0	0	A_42_P504653	NM_017143	1876.42	398.573	4.492814e+001	5.677737e+000	104.5	33.5	6.705290e+000	0	0	0	0	0	0	40.5665	1	1	57.5363	33.7333
DATA	2523	30	58	0	0	A_64_P017891	A_64_P017891	1901.58	398.573	1.199130e+001	3.688881e+000	72.5	27	5.096784e+000	0	0	0	0	0	0	10.7743	1	0	65	27.8519
DATA	2524	30	59	0	0	A_42_P642724	NM_001107585	1927.42	398.573	3.924795e+003	3.924951e+002	3468	33	8.654025e+000	0	0	0	0	0	0	3508.74	1	1	57.5363	31.3235
DATA	2525	30	60	0	0	A_42_P780943	NM_001011906	1952.58	398.573	9.845475e+002	9.851778e+001	946	32	8.251833e+000	0	0	0	0	0	0	875.871	1	1	57.5363	33.3125
DATA	2526	30	61	0	0	A_44_P482325	NM_145669	1977.96	398.623	9.508061e+002	9.514652e+001	869	29	7.879063e+000	0	0	0	0	0	0	841.695	1	1	49.1849	29.7188
DATA	2527	30	62	0	0	A_42_P716750	NM_001024757	2002.96	398.529	3.033948e+002	3.054741e+001	320.5	32	8.842833e+000	0	0	0	0	0	0	267.276	1	1	47.8731	31.9355
DATA	2528	30	63	0	0	A_64_P009565	NM_001191823	2028.63	398.63	2.242944e+002	2.271266e+001	257	36	9.080799e+000	0	0	0	0	0	0	196.622	1	1	48.2044	35.5667
DATA	2529	30	64	0	0	A_42_P495969	NM_012824	2053.86	398.53	8.833730e+003	8.833803e+002	7642	30	9.151459e+000	0	0	0	0	0	0	7706.51	1	1	45.4864	30.7222
DATA	2530	30	65	0	0	A_64_P154671	ENSRNOT00000024704	2079.67	398.836	1.988126e+002	2.020640e+001	235	30	1.014501e+001	0	0	0	0	0	0	172.611	1	1	48.2044	30.7241
DATA	2531	30	66	0	0	A_44_P111337	NM_001108724	2104.71	399.167	2.851009e+003	2.851240e+002	2450	28	5.351212e+000	0	0	0	0	0	0	2463.93	1	1	45.835	28.7241
DATA	2532	30	67	0	0	A_42_P665627	NM_023095	2130.42	398.573	5.872511e+001	6.911482e+000	114	28	7.346278e+000	0	0	0	0	0	0	50.5075	1	1	57.5363	29.697
DATA	2533	30	68	0	0	A_44_P447585	NM_001166676	2155.58	398.573	1.014071e+001	3.798852e+000	69.5	32	7.279719e+000	0	0	0	0	0	0	8.68231	1	0	57.5363	30.9259
DATA	2534	30	69	0	0	A_42_P463754	NM_030994	2180.81	398.725	5.706339e+002	5.718175e+001	545	31	6.983534e+000	0	0	0	0	0	0	486.419	1	1	46.8651	32.6286
DATA	2535	30	70	0	0	A_42_P644717	NM_001108927	2206.4	398.962	4.468203e+000	3.720102e+000	61	29	1.190527e+001	0	0	0	0	0	0	3.79228	1	0	49.1849	31.4286
DATA	2536	30	71	0	0	A_42_P546539	NM_001135801	2231.79	398.806	6.857248e+002	6.867271e+001	632	31	9.698485e+000	0	0	0	0	0	0	579.513	1	1	47.5395	31
DATA	2537	30	72	0	0	A_42_P818297	XM_001073988	2257.23	398.884	1.550315e+003	1.550762e+002	1319	34	5.731722e+000	0	0	0	0	0	0	1304.84	1	1	46.5243	32.3
DATA	2538	30	73	0	0	A_64_P047416	NM_001109501	2282.56	398.973	2.504668e+002	2.532420e+001	270	31	7.264467e+000	0	0	0	0	0	0	209.981	1	1	48.5334	32.4286
DATA	2539	30	74	0	0	A_43_P18389	XM_002726292	2308.09	398.935	1.843102e+001	4.181319e+000	76	30.5	8.026207e+000	0	0	0	0	0	0	15.3927	1	0	54.4085	30.5
DATA	2540	30	75	0	0	A_64_P044276	NM_001105946	2333.59	398.908	3.153085e+003	3.153310e+002	2605	26	6.087534e+000	0	0	0	0	0	0	2623.72	1	1	49.1849	28.5161
DATA	2541	30	76	0	0	A_64_P059475	ENSRNOT00000029976	2358.91	398.935	2.763057e+001	4.682078e+000	83	30	8.960717e+000	0	0	0	0	0	0	22.9129	1	1	65	31.3611
DATA	2542	30	77	0	0	A_64_P005496	A_64_P005496	2384.5	399	1.655962e+001	4.138016e+000	72	29	7.582572e+000	0	0	0	0	0	0	13.6875	1	0	54.1152	29.5667
DATA	2544	30	79	0	0	A_42_P739860	NM_133578	2434.79	398.806	1.762010e+003	1.762423e+002	1458	27.5	6.855991e+000	0	0	0	1	0	0	1447.88	1	1	47.5395	28.2692
DATA	2545	30	80	0	0	A_42_P681251	NM_030844	2460.64	398.87	3.717904e+003	3.718101e+002	3048.5	29	6.511363e+000	0	0	0	0	0	0	3047.06	1	1	46.8651	29.2581
DATA	2546	30	81	0	0	A_42_P567793	NM_001107668	2485.56	399.027	2.580574e+003	2.580859e+002	2105	30	6.032452e+000	0	0	0	0	0	0	2110.14	1	1	48.5334	29.9048
DATA	2547	30	82	0	0	A_64_P041662	NM_182843	2511.48	398.945	4.315146e+002	4.332212e+001	403	29	1.066417e+001	0	0	0	0	0	0	352.09	1	1	48.5334	32.2692
DATA	2548	30	83	0	0	A_42_P534679	NM_001134974	2536.59	399.092	2.733712e+003	2.733983e+002	2200.5	32	6.948960e+000	0	0	0	0	0	0	2226.6	1	1	49.1849	31.125
DATA	2549	30	84	66	1	DarkCorner	DarkCorner	2562	399	3.867118e+000	3.854390e+000	57	30	9.170822e+000	0	0	0	0	0	0	-0.936955	0	0	65	29.3056
DATA	2550	30	85	66	1	DarkCorner	DarkCorner	2587.72	399.108	3.871883e+000	3.874299e+000	61	26	7.146634e+000	0	0	0	0	0	0	2.781	0	0	48.8603	26.2519
DATA	2551	31	1	66	1	DarkCorner	DarkCorner	441.5	405	6.144626e+000	3.538237e+000	67	29	6.820740e+000	0	0	0	0	0	0	5.52745	1	0	54.1152	29.2127
DATA	2552	31	2	0	0	A_42_P576549	NM_001106490	467.13	404.896	1.396604e+001	3.726764e+000	75	31	8.457804e+000	0	0	0	0	0	0	12.6698	1	0	47.8731	31.3714
DATA	2553	31	3	0	0	A_42_P542638	NM_001012202	492.152	405.136	6.685567e+002	6.694349e+001	672	35	5.811602e+000	0	0	0	0	0	0	611.318	1	1	46.1809	34.1333
DATA	2554	31	4	0	0	A_42_P765736	NM_001025670	517.608	405.069	4.157278e+001	5.371805e+000	101	35	7.430598e+000	0	0	0	0	0	0	38.3042	1	1	53.8203	34.6
DATA	2555	31	5	0	0	A_44_P372461	NM_001170708	543.418	405.427	5.823824e+002	5.833606e+001	616	31.5	7.295533e+000	0	0	0	0	0	0	540.571	1	1	57.5363	32.4688
DATA	2556	31	6	0	0	A_64_P070554	XM_001059856	568.859	404.901	4.356160e+001	5.497807e+000	106	29	8.783736e+000	0	0	0	0	0	0	40.7098	1	1	46.8651	30.1333
DATA	2557	31	7	0	0	A_64_P030859	ENSRNOT00000045252	593.842	404.947	1.719457e+004	1.719460e+003	15986.5	30	6.015412e+000	0	0	0	0	0	0	16171.6	1	1	48.2044	31.5
DATA	2558	31	8	0	0	A_64_P079260	NM_001005546	619.065	405.032	2.306818e+002	2.330481e+001	285	33	6.896943e+000	0	0	0	0	0	0	218.28	1	1	45.1352	32.4667
DATA	2559	31	9	0	0	A_64_P149846	A_64_P149846	644.567	405.239	1.358734e+004	1.358738e+003	13083	32.5	7.371894e+000	0	0	0	0	0	0	12931.4	1	1	46.5243	33
DATA	2560	31	10	0	0	A_64_P120624	NM_031634	669.986	404.857	1.117051e+001	3.461144e+000	72	30	6.936553e+000	0	0	0	0	0	0	10.6882	1	0	46.8651	30.5172
DATA	2561	31	11	0	0	A_64_P158020	NM_001008909	696	405.236	7.204250e+001	7.907116e+000	132.5	32	8.251019e+000	0	0	0	0	0	0	69.2895	1	1	47.2035	33.2647
DATA	2562	31	12	0	0	A_64_P116606	NM_153724	720.831	405.648	6.429614e+001	7.201670e+000	123	28	8.353759e+000	0	0	0	0	0	0	62.1239	1	1	47.5395	29.2162
DATA	2563	31	13	0	0	A_44_P532436	ENSRNOT00000006946	746.418	405.427	2.183610e+001	3.898937e+000	83.5	29	7.405897e+000	0	0	0	0	0	0	21.1897	1	1	57.5363	30.7742
DATA	2564	31	14	0	0	A_64_P027545	NM_023095	771.582	405.427	1.755250e+002	1.784495e+001	238	34	1.040436e+001	0	0	0	0	0	0	171	1	1	57.5363	34.5926
DATA	2565	31	15	0	0	A_64_P076705	NM_017088	797.418	405.427	1.090918e+005	1.090918e+004	105135	37.5	1.081765e+001	0	0	0	0	0	0	106672	1	1	57.5363	38.6923
DATA	2566	31	16	0	0	A_44_P238642	NM_001127201	822.5	405.043	4.833779e+003	4.833884e+002	4637	30.5	4.464628e+000	0	0	0	0	0	0	4741.75	1	1	47.8731	30.1364
DATA	2567	31	17	0	0	A_64_P037249	NM_001105802	848.123	405.493	1.003775e+002	1.053115e+001	161	34	9.038169e+000	0	0	0	0	0	0	98.7646	1	1	48.2044	34.3667
DATA	2568	31	18	0	0	A_64_P061524	NM_172064	873.418	405.427	2.464126e+002	2.484527e+001	301	32.5	1.052014e+001	0	0	0	0	0	0	243.087	1	1	57.5363	34.1875
DATA	2569	31	19	0	0	A_42_P536564	NM_001008344	898.347	405.778	3.845817e+003	3.845947e+002	3752	32	7.481533e+000	0	0	0	0	0	0	3802.65	1	1	47.5395	30.84
DATA	2570	31	20	0	0	A_64_P062433	NM_001135804	923.721	405.967	5.295865e+002	5.305306e+001	598	32	5.702103e+000	0	0	0	0	0	0	524.698	1	1	44.7812	30.7742
DATA	2571	31	21	0	0	A_42_P665509	NM_053777	949.5	405.5	4.688787e+004	4.688788e+003	45847	33.5	7.340714e+000	0	0	0	0	0	0	46532.7	1	1	57.5363	33.2813
DATA	2572	31	22	0	0	A_44_P250144	NM_001001373	974.893	405.5	7.895094e+000	3.251378e+000	70.5	33	1.060492e+001	0	0	0	0	0	0	7.84609	1	0	65	35.1333
DATA	2573	31	23	0	0	A_42_P746838	NM_001024286	999.973	405.351	2.501433e+001	4.022979e+000	88	37	9.121653e+000	0	0	0	0	0	0	24.8853	1	1	49.1849	36.2727
DATA	2574	31	24	0	0	A_44_P210852	NM_001034187	1025.54	405.618	1.078086e+002	1.123111e+001	172	37	6.399469e+000	0	0	0	0	0	0	107.34	1	1	47.2035	33.8966
DATA	2575	31	25	0	0	A_64_P019390	A_64_P019390	1051.11	405.5	3.558268e+001	4.750004e+000	98	34	8.629634e+000	0	0	0	0	0	0	35.4454	1	1	56.9804	33.1176
DATA	2576	31	26	0	0	A_64_P134709	NM_001105760	1076.38	405.416	1.167436e+002	1.209082e+001	178	33	8.335190e+000	0	0	0	0	0	0	116.317	1	1	49.8279	32.3056
DATA	2578	31	28	0	0	A_64_P028117	NM_001000372	1127.33	405.5	4.421883e+001	5.427505e+000	105	33	1.048922e+001	0	0	0	0	0	0	44.0405	1	1	65	33.0968
DATA	2579	31	29	0	0	A_44_P391517	NM_001034144	1152.5	405.5	4.685053e+002	4.695624e+001	536.5	38	8.736513e+000	0	0	0	0	0	0	466.341	1	1	57.5363	35.92
DATA	2580	31	30	0	0	A_42_P743682	NM_133599	1178.11	405.5	5.230324e+001	6.106529e+000	116	32	9.190637e+000	0	0	0	0	0	0	52.0171	1	1	56.9804	33.0303
DATA	2581	31	31	0	0	A_64_P163075	NM_001109321	1202.87	405.551	4.989452e+001	5.903323e+000	114	30	8.739604e+000	0	0	0	0	0	0	49.5687	1	1	47.2035	31.4545
DATA	2582	31	32	0	0	A_44_P393422	NM_001013188	1228.67	405.5	1.171930e+003	1.172356e+002	1220	30	7.709232e+000	0	0	0	0	0	0	1162.69	1	1	57.5363	31.0323
DATA	2583	31	33	0	0	A_44_P288982	NM_001107913	1254.2	405.543	9.846770e+001	1.034274e+001	163.5	32.5	9.866396e+000	0	0	0	0	0	0	97.5366	1	1	51.0895	34.4063
DATA	2584	31	34	0	0	A_64_P009788	NM_001191099	1279.6	406.032	2.496596e+001	4.035066e+000	87	36	1.199417e+001	0	0	0	0	0	0	24.6865	1	1	44.0646	37.88
DATA	2585	31	35	0	0	A_42_P764228	NM_031707	1304.88	405.735	5.973215e+003	5.973299e+002	5764	36	1.096162e+001	0	0	0	0	0	0	5894.22	1	1	45.835	37.5714
DATA	2586	31	36	0	0	A_64_P161621	NM_001101015	1330.17	405.549	3.140748e+002	3.156843e+001	372.5	34	8.773130e+000	0	0	0	0	0	0	309.223	1	1	47.5395	34.9697
DATA	2587	31	37	0	0	A_42_P763522	NM_001013980	1355.57	405.389	4.093609e+003	4.093734e+002	3958.5	34.5	7.734893e+000	0	0	0	0	0	0	4020.42	1	1	48.2044	34.3333
DATA	2588	31	38	0	0	A_64_P029935	NM_001109299	1381.18	405.621	6.290812e+002	6.298945e+001	678	32	5.315022e+000	0	0	0	0	0	0	616.198	1	1	45.4864	32.871
DATA	2589	31	39	0	0	A_64_P045053	A_64_P045053	1406.58	405.573	2.150124e+002	2.173942e+001	273	32	8.062728e+000	0	0	0	0	0	0	210.009	1	1	57.5363	32.8485
DATA	2590	31	40	0	0	A_42_P540920	NM_001135045	1431.63	405.5	5.456874e+003	5.456969e+002	5058	34	9.885303e+000	0	0	0	0	0	0	5313.91	1	1	47.8731	34.8276
DATA	2591	31	41	0	0	A_64_P055323	NM_001191930	1456.83	405.6	3.606855e+002	3.621280e+001	418.5	35	8.212110e+000	0	0	0	0	0	0	350.124	1	1	47.2035	37.1481
DATA	2592	31	42	0	0	A_64_P047162	NM_153472	1482.67	405.671	5.421036e+003	5.421133e+002	5197.5	30	8.286411e+000	0	0	0	0	0	0	5244.28	1	1	48.2044	32.7692
DATA	2593	31	43	0	0	A_64_P279594	NM_001170476	1508.42	405.573	2.433487e+001	4.061566e+000	88	33.5	8.625277e+000	0	0	0	0	0	0	23.4567	1	1	65	34.4667
DATA	2594	31	44	0	0	A_42_P665509	NM_053777	1533.58	405.573	4.686870e+004	4.686871e+003	44527	35.5	7.501417e+000	0	0	0	0	0	0	45012.1	1	1	57.5363	35.2667
DATA	2595	31	45	0	0	A_64_P106638	NM_001108198	1559	405.545	8.477811e+001	9.088883e+000	145	35	9.171602e+000	0	0	0	0	0	0	81.1072	1	1	65	34.5806
DATA	2596	31	46	0	0	A_64_P141245	NM_001105920	1584.11	405.648	1.772248e+003	1.772554e+002	1726	35	9.373952e+000	0	0	0	0	0	0	1688.88	1	1	47.8731	36
DATA	2597	31	47	0	0	A_42_P503739	FQ231471	1609.51	405.63	1.840409e+004	1.840412e+003	16882	35	6.020478e+000	0	0	0	0	0	0	17466.5	1	1	48.5334	36.3846
DATA	2598	31	48	0	0	A_44_P282433	NM_033230	1634.94	405.768	6.492234e+002	6.500700e+001	664	34	5.727681e+000	0	0	0	0	0	0	613.558	1	1	46.5243	34.5217
DATA	2599	31	49	0	0	A_42_P585750	NM_001202463	1660.5	405.648	1.782649e+001	3.778233e+000	81	33	7.945010e+000	0	0	0	0	0	0	16.7736	1	1	57.5363	34.5833
DATA	2600	31	50	0	0	A_42_P523517	FQ229104	1685.66	405.878	5.352901e+003	5.353006e+002	4859	32	7.178597e+000	0	0	0	0	0	0	5014.82	1	1	48.8603	33.375
DATA	2601	31	51	0	0	A_64_P126190	NM_001113789	1711.42	405.573	3.225351e+001	4.658500e+000	91	31	7.906712e+000	0	0	0	0	0	0	30.0766	1	1	57.5363	32.0333
DATA	2602	31	52	0	0	A_42_P549675	NM_080577	1736.38	406	4.296989e+003	4.297122e+002	3838	29	6.223611e+000	0	0	0	0	0	0	3989.12	1	1	48.5334	31
DATA	2603	31	53	0	0	A_42_P535644	NM_024400	1762.07	405.786	4.623698e+002	4.636128e+001	473	33	9.644989e+000	0	0	0	0	0	0	427.198	1	1	46.8651	33.6774
DATA	2604	31	54	0	0	A_64_P050233	XM_345239	1787.68	405.742	2.081283e+002	2.109015e+001	248	31	5.700783e+000	0	0	0	0	0	0	191.376	1	1	45.4864	31.9677
DATA	2605	31	55	0	0	A_64_P121575	NM_001013144	1812.91	405.935	5.909333e+001	6.830177e+000	116	30	1.035489e+001	0	0	0	0	0	0	54.0799	1	1	54.4085	32.9032
DATA	2606	31	56	0	0	A_64_P018263	NM_012728	1838.21	405.907	3.194901e+002	3.213385e+001	355	32.5	8.440188e+000	0	0	0	0	0	0	290.974	1	1	48.2044	32.0667
DATA	2607	31	57	0	0	A_64_P164682	TC600307	1863.5	406	1.606857e+004	1.606861e+003	14605	34	9.745143e+000	0	0	0	0	0	0	14563.6	1	1	48.5334	33.9697
DATA	2608	31	58	0	0	A_44_P1045612	NM_172317	1889.07	406.2	3.602939e+002	3.619663e+001	384.5	31	6.886171e+000	0	0	0	0	0	0	324.95	1	1	46.8651	31.5
DATA	2609	31	59	0	0	A_42_P529514	NM_001008308	1914.09	405.896	5.701323e+002	5.712010e+001	559	28.5	7.228815e+000	0	0	0	0	0	0	511.688	1	1	46.8651	29.525
DATA	2610	31	60	0	0	A_44_P870348	NM_001107522	1939.96	406.043	3.729386e+002	3.745868e+001	396	33.5	9.604896e+000	0	0	0	0	0	0	333.041	1	1	46.8651	32.2333
DATA	2611	31	61	0	0	A_64_P108264	XM_223835	1965.09	405.806	1.045473e+002	1.103373e+001	159	31	9.618359e+000	0	0	0	0	0	0	92.9047	1	1	46.1809	32.5
DATA	2612	31	62	0	0	A_42_P754784	CB328432	1990.44	405.973	6.595853e+003	6.595948e+002	5727	30	7.203200e+000	0	0	0	0	0	0	5832.85	1	1	48.5334	30.2813
DATA	2613	31	63	0	0	A_64_P084525	NM_001101001	2015.71	406.106	1.836821e+003	1.837167e+002	1609.5	33	8.707678e+000	0	0	0	0	0	0	1616.5	1	1	45.835	33.0968
DATA	2614	31	64	0	0	A_64_P378583	NM_001099516	2041.41	406.07	1.009868e+001	3.718969e+000	69	31	7.702115e+000	0	0	0	0	0	0	8.84386	1	0	48.2044	31.4516
DATA	2615	31	65	0	0	A_64_P154172	NM_001000557	2066.75	406.615	3.607905e+000	3.596031e+000	59	30.5	9.479864e+000	0	0	0	0	0	0	-1.24046	0	0	44.7812	32.1667
DATA	2616	31	66	0	0	A_64_P074634	NM_001024287	2092	406.079	1.593682e+002	1.634132e+001	202	31	5.908373e+000	0	0	0	0	0	0	138.246	1	1	45.4864	30.1379
DATA	2617	31	67	1028	1	(+)E1A_r60_a22	E1A_r60_a22	2117.73	406.219	1.362195e+002	1.409743e+001	178	28	4.722861e+000	0	0	0	0	0	0	117.611	1	1	48.2044	29.3448
DATA	2618	31	68	0	0	A_43_P12780	NM_053350	2142.86	406.211	8.220467e+001	8.993133e+000	130	30	7.406092e+000	0	0	0	0	0	0	70.6532	1	1	47.2035	29.3077
DATA	2619	31	69	0	0	A_44_P442169	NM_001013034	2168.3	405.9	4.066844e+003	4.067009e+002	3405	32	8.833378e+000	0	0	0	0	0	0	3479.43	1	1	47.2035	32.1667
DATA	2620	31	70	0	0	A_64_P093894	A_64_P093894	2193.9	406.014	3.892378e+001	5.356485e+000	92.5	31	6.550110e+000	0	0	0	0	0	0	33.1552	1	1	46.8651	31.2414
DATA	2621	31	71	0	0	A_64_P073378	NM_001025287	2218.83	406	1.226392e+003	1.226948e+002	1068	31	9.520396e+000	0	0	0	0	0	0	1040.26	1	1	46.8651	30.931
DATA	2622	31	72	0	0	A_64_P096076	A_64_P096076	2244.8	406.087	3.723270e+000	3.713398e+000	61	32.5	7.961132e+000	0	0	0	0	0	0	1.12329	0	0	46.5243	32.25
DATA	2623	31	73	0	0	A_42_P471835	TC610276	2269.61	406.147	3.055252e+003	3.055480e+002	2579	34	5.778449e+000	0	0	0	0	0	0	2570.53	1	1	48.8603	32.9048
DATA	2624	31	74	0	0	A_42_P767737	AY724480	2295.5	406.195	5.102743e+003	5.102881e+002	4172.5	31	8.193362e+000	0	0	0	0	0	0	4276.35	1	1	49.8279	30.7419
DATA	2625	31	75	0	0	A_64_P016393	A_64_P016393	2320.57	406.284	4.363752e+003	4.363913e+002	3676.5	32	7.029441e+000	0	0	0	0	0	0	3643.77	1	1	46.5243	31.25
DATA	2626	31	76	0	0	A_42_P803752	XM_580093	2345.94	405.968	1.613617e+001	4.098382e+000	74.5	29	8.489520e+000	0	0	0	0	0	0	13.4255	1	0	45.1352	29.6829
DATA	2627	31	77	0	0	A_42_P589025	NM_134363	2371.5	406	6.752041e+004	6.752042e+003	54248.5	31	8.776113e+000	0	0	0	0	0	0	55989.6	1	1	54.1152	31.2571
DATA	2628	31	78	0	0	A_64_P107938	NM_001000930	2396.95	406.333	1.534279e+001	4.090313e+000	72	29	7.199480e+000	0	0	0	0	0	0	12.6836	1	0	45.4864	28.2414
DATA	2629	31	79	0	0	A_64_P088817	A_64_P088817	2422.39	406.333	3.607276e+002	3.627265e+001	351	30	6.893272e+000	0	0	0	0	0	0	297.333	1	1	47.2035	29.5357
DATA	2630	31	80	0	0	A_64_P000579	A_64_P000579	2447.71	406.147	1.713471e+004	1.713475e+003	13991	26	5.776204e+000	0	0	0	0	0	0	14084.8	1	1	45.835	27.3103
DATA	2631	31	81	0	0	A_44_P570046	TC630334	2473.29	406.43	2.265095e+002	2.297122e+001	244	32	7.228667e+000	0	0	0	0	0	0	185.742	1	1	50.7771	31.4167
DATA	2632	31	82	0	0	A_44_P431629	NM_001106835	2498.5	406.352	1.019748e+002	1.089333e+001	139.5	28	9.113948e+000	0	0	0	0	0	0	83.436	1	1	57.5363	29.7241
DATA	2634	31	84	0	0	A_42_P485932	NM_001034927	2549.19	406.481	1.361995e+004	1.362001e+003	10873	30	8.375133e+000	0	0	0	1	0	0	11103.9	1	1	49.8279	29.9286
DATA	2635	31	85	66	1	DarkCorner	DarkCorner	2574.58	406.427	3.862847e+000	3.850133e+000	58	30	7.649729e+000	0	0	0	0	0	0	-0.363106	0	0	57.5363	28.2826
DATA	2636	32	1	66	1	DarkCorner	DarkCorner	454.543	412.37	3.477497e+000	3.466052e+000	61	29	9.033331e+000	0	0	0	0	0	0	-1.07513	0	0	51.4001	30.375
DATA	2637	32	2	0	0	A_64_P048366	ENSRNOT00000059330	479.8	412.386	1.735921e+003	1.736261e+002	1648	35	9.623945e+000	0	0	0	0	0	0	1582.64	1	1	47.2035	33.5294
DATA	2638	32	3	0	0	A_44_P1058980	NM_001012036	504.828	412.656	2.922120e+003	2.922319e+002	2689	37	6.977371e+000	0	0	0	0	0	0	2684.67	1	1	45.4864	37.0606
DATA	2639	32	4	0	0	A_64_P062562	ENSRNOT00000027655	530.469	412.375	3.877019e+001	5.147771e+000	99	32	8.564509e+000	0	0	0	0	0	0	35.8852	1	1	45.1352	32.5625
DATA	2640	32	5	0	0	A_44_P490100	ENSRNOT00000043641	555.893	412.5	2.945941e+001	4.470646e+000	91	30	6.847027e+000	0	0	0	0	0	0	27.4597	1	1	65	31.1034
DATA	2641	32	6	0	0	A_42_P473886	NM_001165922	581.429	412.524	3.404716e+002	3.421064e+001	386	29	6.532224e+000	0	0	0	0	0	0	319.485	1	1	44.4243	29.7931
DATA	2642	32	7	0	0	A_64_P393339	ENSRNOT00000057753	606.324	412.887	4.253175e+001	5.395421e+000	102.5	30	5.639740e+000	0	0	0	0	0	0	40.1576	1	1	47.5395	31.84
DATA	2643	32	8	0	0	A_44_P461154	NM_053819	632.107	412.5	6.292024e+002	6.300673e+001	644	32	8.881784e+000	0	0	0	0	0	0	597.625	1	1	56.9804	32.2188
DATA	2644	32	9	0	0	A_42_P701991	NM_001100671	657.568	412.608	3.802979e+003	3.803121e+002	3585.5	32	6.197091e+000	0	0	0	0	0	0	3632.26	1	1	49.1849	33.2414
DATA	2645	32	10	1028	1	(+)E1A_r60_1	E1A_r60_1	682.893	412.5	3.275733e+000	3.265602e+000	61	33	8.006863e+000	0	0	0	0	0	0	0.625445	0	0	56.9804	34.2121
DATA	2646	32	11	0	0	A_44_P541230	ENSRNOT00000010675	707.969	412.785	1.937110e+003	1.937383e+002	1901	31	7.615177e+000	0	0	0	0	0	0	1868.64	1	1	45.835	31.5938
DATA	2647	32	12	0	0	A_64_P004593	NM_001166761	733.582	412.573	9.989300e+000	3.385511e+000	70.5	28	6.724548e+000	0	0	0	0	0	0	9.67958	1	0	57.5363	29.2333
DATA	2648	32	13	0	0	A_64_P018385	ENSRNOT00000063845	759	412.545	1.393046e+001	3.509754e+000	75	34	8.066250e+000	0	0	0	0	0	0	13.5544	1	0	55.8519	33.2424
DATA	2649	32	14	0	0	A_64_P017590	NM_001000096	784.5	412.648	3.219807e+000	3.209210e+000	64	34	1.078154e+001	0	0	0	0	0	0	-0.409003	0	0	57.5363	34.8077
DATA	2650	32	15	0	0	A_42_P810118	XM_001075984	809.582	412.573	6.610853e+002	6.618585e+001	685	31	7.316396e+000	0	0	0	0	0	0	647.892	1	1	57.5363	31.4348
DATA	2651	32	16	0	0	A_42_P772157	NM_017020	835.123	412.662	1.299119e+003	1.299510e+002	1316	31	4.918672e+000	0	0	0	0	0	0	1277.2	1	1	45.4864	31.88
DATA	2652	32	17	0	0	A_42_P542809	NM_021671	860.306	413.194	4.955040e+002	4.965229e+001	538.5	38.5	8.919564e+000	0	0	0	0	0	0	488.518	1	1	44.4243	36.6
DATA	2653	32	18	0	0	A_42_P645352	NM_001126371	885.712	413.167	5.847615e+003	5.847701e+002	5702	30	9.235364e+000	0	0	0	0	0	0	5779.42	1	1	45.835	30.5333
DATA	2654	32	19	0	0	A_64_P106933	NM_001130493	911.194	412.855	3.892336e+001	5.016549e+000	104	31	7.126808e+000	0	0	0	0	0	0	38.5515	1	1	45.1352	31.4839
DATA	2655	32	20	0	0	A_42_P614175	NM_033237	936.671	413.214	5.785366e+002	5.793983e+001	620	33	7.161404e+000	0	0	0	0	0	0	574.086	1	1	47.2035	32
DATA	2656	32	21	0	0	A_64_P147190	NM_031840	962.06	412.687	2.846415e+003	2.846589e+002	2806	34.5	1.107827e+001	0	0	0	0	0	0	2828.72	1	1	45.835	37.3824
DATA	2657	32	22	0	0	A_43_P11268	NM_031762	987.292	412.754	3.669728e+003	3.669863e+002	3626	34	8.589816e+000	0	0	0	0	0	0	3651.4	1	1	45.1352	35.4194
DATA	2658	32	23	0	0	A_64_P022215	A_64_P022215	1013.09	412.702	1.620153e+002	1.650438e+001	229	34	7.209928e+000	0	0	0	0	0	0	161.359	1	1	45.835	33.6765
DATA	2659	32	24	0	0	A_64_P001080	NM_001109379	1038.2	413.029	1.089047e+002	1.133553e+001	174	36	7.364688e+000	0	0	0	0	0	0	108.536	1	1	46.8651	34.6364
DATA	2660	32	25	0	0	A_42_P468662	NM_001108886	1063.73	412.781	1.472869e+003	1.473205e+002	1506	33	7.325699e+000	0	0	0	0	0	0	1468.38	1	1	48.2044	32.6389
DATA	2661	32	26	0	0	A_42_P522285	NM_001044263	1088.93	412.786	4.523639e+002	4.534550e+001	494	33.5	9.250005e+000	0	0	0	0	0	0	451.025	1	1	46.8651	33.7105
DATA	2662	32	27	0	0	A_42_P478500	NM_177421	1114.5	413	1.520181e+005	1.520181e+004	150881	33	9.572474e+000	0	0	0	0	0	0	151543	1	1	54.1152	34.9677
DATA	2663	32	28	0	0	A_42_P739860	NM_133578	1139.9	412.863	1.848747e+003	1.849015e+002	1826	36	1.142270e+001	0	0	0	0	0	0	1842.11	1	1	46.8651	36.2667
DATA	2664	32	29	0	0	A_42_P708614	NM_001130505	1165.5	413	4.694602e+004	4.694603e+003	45620	33.5	8.225975e+000	0	0	0	0	0	0	46744.5	1	1	54.1152	34.5
DATA	2665	32	30	0	0	A_64_P067000	NM_001108721	1190.5	413	4.530536e+002	4.541481e+001	501	31	9.306935e+000	0	0	0	0	0	0	450.681	1	1	54.1152	32.2143
DATA	2666	32	31	0	0	A_44_P590748	NM_001109199	1216.07	412.971	7.624744e+001	8.251650e+000	139	31	8.654019e+000	0	0	0	0	0	0	75.7556	1	1	46.8651	32.2727
DATA	2667	32	32	0	0	A_42_P742797	NM_001106761	1241.29	412.754	3.415597e+003	3.415743e+002	3342.5	32.5	7.913787e+000	0	0	0	0	0	0	3388.61	1	1	45.1352	33.2188
DATA	2668	32	33	0	0	A_42_P761277	NM_001008297	1266.87	413	1.042538e+003	1.043018e+002	1093	35	1.206714e+001	0	0	0	0	0	0	1032.58	1	1	48.5334	37.5172
DATA	2669	32	34	0	0	A_42_P503739	FQ231471	1292.24	413	1.852092e+004	1.852095e+003	17650	36	1.144121e+001	0	0	0	0	0	0	18309.1	1	1	46.8651	35.913
DATA	2670	32	35	0	0	A_42_P635760	ENSRNOT00000023806	1317.37	413.014	9.432938e+003	9.432991e+002	9140	30.5	7.405400e+000	0	0	0	0	0	0	9305.5	1	1	47.2035	32.1071
DATA	2671	32	36	0	0	A_64_P136337	ENSRNOT00000064588	1342.87	413.1	4.615362e+003	4.615472e+002	4458	35	7.278273e+000	0	0	0	0	0	0	4542.4	1	1	46.8651	33.7647
DATA	2672	32	37	0	0	A_64_P128316	ENSRNOT00000062007	1368.95	412.766	1.568781e+001	3.557821e+000	76	33	7.201430e+000	0	0	0	0	0	0	15.399	1	0	45.4864	33.3684
DATA	2673	32	38	0	0	A_64_P050799	A_64_P050799	1393.91	413.065	1.404135e+002	1.440177e+001	204	33	6.194909e+000	0	0	0	0	0	0	137.463	1	1	54.4085	32.5758
DATA	2674	32	39	0	0	A_42_P701779	NM_001108048	1419.09	412.896	1.949710e+003	1.949974e+002	1859	37	8.975910e+000	0	0	0	0	0	0	1903.18	1	1	46.8651	36.5185
DATA	2675	32	40	0	0	A_42_P604900	NM_199117	1444.7	412.9	4.238752e+003	4.238874e+002	4038	35	9.770678e+000	0	0	0	0	0	0	4124.66	1	1	47.2035	37.1154
DATA	2676	32	41	0	0	A_44_P1060444	NM_001106644	1469.78	413	3.999669e+003	3.999799e+002	3833	34	8.738495e+000	0	0	0	0	0	0	3879.48	1	1	46.1809	35.1935
DATA	2677	32	42	0	0	A_64_P090339	NM_001000756	1495.34	412.985	5.094395e+001	6.038932e+000	111.5	30	8.626839e+000	0	0	0	0	0	0	49.2422	1	1	46.1809	32.7879
DATA	2678	32	43	0	0	A_42_P770556	NM_033096	1520.55	412.973	7.363161e+003	7.363233e+002	6881	37	6.909655e+000	0	0	0	0	0	0	7091.81	1	1	48.5334	35.08
DATA	2679	32	44	0	0	A_44_P606502	NM_001130502	1546.5	413	2.970196e+001	4.415279e+000	92.5	36	7.403090e+000	0	0	0	0	0	0	28.4981	1	1	54.1152	35.4333
DATA	2680	32	45	0	0	A_64_P372189	NM_212516	1571.58	413.427	5.243308e+004	5.243309e+003	49540	32	8.409011e+000	0	0	0	0	0	0	50118	1	1	57.5363	34.4348
DATA	2681	32	46	0	0	A_42_P540518	NM_199399	1596.85	412.718	3.248801e+003	3.248968e+002	3025	35.5	9.283591e+000	0	0	0	1	0	0	3092.66	1	1	47.2035	35.5667
DATA	2682	32	47	0	0	A_64_P158955	ENSRNOT00000020260	1622.5	413.352	2.099114e+001	3.916326e+000	86	34	5.363961e+000	0	0	0	0	0	0	19.9006	1	1	65	35.1852
DATA	2683	32	48	0	0	A_44_P325841	NM_024130	1647.5	412.727	1.821665e+003	1.821967e+002	1776	33	8.493000e+000	0	0	0	0	0	0	1719.65	1	1	46.5243	34.1481
DATA	2684	32	49	0	0	A_64_P007743	XM_001071416	1673.27	412.667	1.440700e+002	1.478801e+001	197	36	8.355602e+000	0	0	0	0	0	0	135.4	1	1	45.835	35.6667
DATA	2685	32	50	0	0	A_64_P136213	A_64_P136213	1698.58	413.427	1.004542e+001	3.497068e+000	70.5	30	7.277572e+000	0	0	0	0	0	0	9.40008	1	0	57.5363	31.0345
DATA	2686	32	51	0	0	A_43_P17392	NM_001191693	1723.75	413.356	2.885744e+003	2.885941e+002	2644.5	34	7.809934e+000	0	0	0	0	0	0	2688.19	1	1	48.5334	33.931
DATA	2687	32	52	0	0	A_42_P708569	NM_001191837	1749.12	413.338	7.786442e+003	7.786515e+002	7362	31	1.018295e+001	0	0	0	0	0	0	7219.93	1	1	45.4864	34.3226
DATA	2688	32	53	0	0	A_64_P062068	XM_002728030	1774.55	412.841	3.668790e+002	3.684480e+001	397	33	6.582806e+000	0	0	0	0	0	0	338.565	1	1	47.2035	32
DATA	2689	32	54	0	0	A_43_P20266	NM_001106416	1800.42	413.427	1.308146e+002	1.351931e+001	180.5	31	5.784067e+000	0	0	0	0	0	0	120.147	1	1	57.5363	30.6176
DATA	2690	32	55	0	0	A_44_P248235	NM_001106048	1825.53	413.106	3.779764e+001	5.103551e+000	95	29	7.832608e+000	0	0	0	0	0	0	34.549	1	1	45.4864	30.7241
DATA	2691	32	56	0	0	A_64_P134717	NM_001101007	1851	413.455	1.819453e+001	3.896596e+000	76	27	7.402779e+000	0	0	0	0	0	0	16.5511	1	1	55.8519	28.6364
DATA	2692	32	57	0	0	A_44_P555005	NM_001000944	1876.42	413.427	4.948052e+001	6.039272e+000	108	32.5	7.495967e+000	0	0	0	0	0	0	44.7918	1	1	65	31.9375
DATA	2693	32	58	0	0	A_42_P832028	NM_001006978	1901.51	413.427	1.127111e+003	1.127648e+002	1058.5	31	7.259367e+000	0	0	0	0	0	0	1015.39	1	1	49.1849	31.5714
DATA	2694	32	59	0	0	A_42_P768380	NM_001100158	1926.99	413.392	6.032218e+003	6.032319e+002	5096	28	9.627023e+000	0	0	0	0	0	0	5407.56	1	1	49.1849	30.7097
[truncated: 6,308,965 more chars]
