# Supplementary material for: Gene Expression in the Hippocampus in a Rat Model of Premenstrual Dysphoric Disorder After Treatment With Baixiangdan Capsules
Source: Front Psychol. 2018 Nov 13;9:2065. doi: 10.3389/fpsyg.2018.02065 (PMC6242977; doi:10.3389/fpsyg.2018.02065)
Supplement: Supplementary file 2 [file Data_Sheet_2.ZIP › Raw Data Files/24_22.txt]

TYPE	text	text	text	integer	text	float	float	text	integer	text	text	integer	integer	integer	integer	float	float	float	float	float	float	text	text	text	text	text	text	text	text	text	text	text	integer	integer	integer	text	integer	boolean
FEPARAMS	Protocol_Name	Protocol_date	Scan_ScannerName	Scan_NumChannels	Scan_Date	Scan_MicronsPerPixelX	Scan_MicronsPerPixelY	Scan_OriginalGUID	Scan_NumScanPass	Grid_Name	Grid_Date	Grid_NumSubGridRows	Grid_NumSubGridCols	Grid_NumRows	Grid_NumCols	Grid_RowSpacing	Grid_ColSpacing	Grid_OffsetX	Grid_OffsetY	Grid_NomSpotWidth	Grid_NomSpotHeight	Grid_GenomicBuild	FeatureExtractor_Barcode	FeatureExtractor_Sample	FeatureExtractor_ScanFileName	FeatureExtractor_ArrayName	FeatureExtractor_ScanFileGUID	FeatureExtractor_DesignFileName	FeatureExtractor_ExtractionTime	FeatureExtractor_UserName	FeatureExtractor_ComputerName	FeatureExtractor_Version	FeatureExtractor_IsXDRExtraction	FeatureExtractor_ColorMode	FeatureExtractor_QCReportType	DyeNorm_NormFilename	DyeNorm_NormNumProbes	Grid_IsGridFile
DATA	GE1_1100_Jul11 (Read Only)	1-Jul-2011 22:30	Agilent Technologies Scanner G2505C US10450393	1	07-11-2013 11:36:06	5	5	2b0edc4a-cb3a-4eca-830e-566ae8841b18	1	028282_D_F_20120224	24-Feb-2012 00:00	1	1	532	85	73.3235	63.5	0	36.6617	65	65	rn4:RGSCv3.4:Nov2004	1_4		M:\2013.07.11 Rat GE 1-color 4x44k(sunpeng)\\US10450393_S01.tif	US10450393_S01	6030c60e-d494-4e84-bafe-d546c781a172	028282_D_F_20120224.xml	11-Jul-2013 15:17:26	admin	KCSY01	11.0.1.1	0	0	0		0	0
*
TYPE	float	float	float	integer	integer	float	float	float	integer	float	float	float	integer	float	float	integer	integer	integer	integer	integer	float	float	float	integer	float	float	float	float	float	integer	integer	float	float	float	float	float	integer	float	float	float	float	integer	float	float	float	float	float	integer	float	float	float	float	float	float	float	integer	float	integer	float	float	float	float	integer	float	float	float	float	text	float	float	float	float	float	float	float	float	float	float	float	float	float	float	float	float	float	float	float	float	float	integer	integer	integer	integer	float	integer	text	integer	text	float	float	float	integer	boolean	float	float	boolean	float	boolean	float	boolean	float	boolean	float	boolean	float	boolean	float	boolean	float	boolean	float	boolean	float	boolean	float	boolean
STATS	gDarkOffsetAverage	gDarkOffsetMedian	gDarkOffsetStdDev	gDarkOffsetNumPts	gSaturationValue	gAvgSig2BkgeQC	gAvgSig2BkgNegCtrl	gRatioSig2BkgeQC_NegCtrl	gNumSatFeat	gLocalBGInlierNetAve	gLocalBGInlierAve	gLocalBGInlierSDev	gLocalBGInlierNum	gGlobalBGInlierAve	gGlobalBGInlierSDev	gGlobalBGInlierNum	gNumFeatureNonUnifOL	gNumPopnOL	gNumNonUnifBGOL	gNumPopnBGOL	gOffsetUsed	gGlobalFeatInlierAve	gGlobalFeatInlierSDev	gGlobalFeatInlierNum	AnyColorPrcntFeatNonUnifOL	AnyColorPrcntBGNonUnifOL	AnyColorPrcntFeatPopnOL	AnyColorPrcntBGPopnOL	TotalPrcntFeatOL	gNumNegBGSubFeat	gNonCtrlNumNegFeatBGSubSig	gSpatialDetrendRMSFit	gSpatialDetrendRMSFilteredMinusFit	gSpatialDetrendSurfaceArea	gSpatialDetrendVolume	gSpatialDetrendAveFit	gNonCtrlNumSatFeat	gNonCtrl99PrcntNetSig	gNonCtrl50PrcntNetSig	gNonCtrl1PrcntNetSig	gNonCtrlMedPrcntCVBGSubSig	gCtrleQCNumSatFeat	gCtrleQC99PrcntNetSig	gCtrleQC50PrcntNetSig	gCtrleQC1PrcntNetSig	geQCMedPrcntCVBGSubSig	geQCSig2BkgLow2	gNegCtrlNumInliers	gNegCtrlAveNetSig	gNegCtrlSDevNetSig	gNegCtrlAveBGSubSig	gNegCtrlSDevBGSubSig	gAveNumPixOLLo	gAveNumPixOLHi	gPixCVofHighSignalFeat	gNumHighSignalFeat	AddErrorEstimateGreen	TotalNumFeatures	ROIHeight	ROIWidth	CentroidDiffX	CentroidDiffY	NumFoundFeat	MaxNonUnifEdges	MaxSpotNotFoundEdges	gMultDetrendRMSFit	gMultDetrendSurfaceAverage	eQCLowSigName2	eQCOneColorLogLowSignal	eQCOneColorLogLowSignalError	eQCOneColorLogHighSignal	eQCOneColorLinFitLogLowConc	eQCOneColorLinFitLogLowSignal	eQCOneColorLinFitLogHighConc	eQCOneColorLinFitLogHighSignal	eQCOneColorLinFitSlope	eQCOneColorLinFitIntercept	eQCOneColorLinFitRSQ	eQCOneColorSpikeDetectionLimit	gNonCtrl50PrcntBGSubSig	gCtrleQC50PrcntBGSubSig	gMedPrcntCVProcSignal	geQCMedPrcntCVProcSignal	gOutlierFlagger_Auto_FeatB_Term	gOutlierFlagger_Auto_FeatC_Term	gOutlierFlagger_Auto_BgndB_Term	gOutlierFlagger_Auto_BgndC_Term	OutlierFlagger_FeatChiSq	OutlierFlagger_BgndChiSq	GriddingStatus	IsGoodGrid	NumGeneNonUnifOL	TotalNumberOfReplicatedGenes	gPercentileIntensityProcessedSignal	ExtractionStatus	QCMetricResults	gNonCtrlNumWellAboveBG	ImageDepth	AFHold	gPMTVolts	GlassThickness	gDDN	GridHasBeenOptimized	gNegCtrlSpread	Metric_IsGoodGrid	Metric_IsGoodGrid_IsInRange	Metric_AnyColorPrcntFeatNonUnifOL	Metric_AnyColorPrcntFeatNonUnifOL_IsInRange	Metric_gNegCtrlAveNetSig	Metric_gNegCtrlAveNetSig_IsInRange	Metric_gNegCtrlAveBGSubSig	Metric_gNegCtrlAveBGSubSig_IsInRange	Metric_gNegCtrlSDevBGSubSig	Metric_gNegCtrlSDevBGSubSig_IsInRange	Metric_gSpatialDetrendRMSFilteredMinusFit	Metric_gSpatialDetrendRMSFilteredMinusFit_IsInRange	Metric_gNonCntrlMedCVProcSignal	Metric_gNonCntrlMedCVProcSignal_IsInRange	Metric_gE1aMedCVProcSignal	Metric_gE1aMedCVProcSignal_IsInRange	Metric_absGE1E1aSlope	Metric_absGE1E1aSlope_IsInRange	Metric_DetectionLimit	Metric_DetectionLimit_IsInRange	Metric_gDDN	Metric_gDDN_IsInRange
DATA	7.82249	7.82249	1.82201	0	778132	1.41304	1.86073	0.759398	0	25.635	33.4575	3.70095	44065	33.4575	3.70095	44065	11	684	9	188	7.82249	3590.09	10622.3	43562	0.0248565	0.0203371	1.54562	0.42482	0.0256548	1584	925	2.08264	2.93804	1.00172	7.81228	62.0418	0	53844.9	372.453	51.365	7.69087	0	208.443	62.3494	48.3338	-1	1.52793	146	46.1201	3.45246	-8.01796	3.0415	0.648393	0.681566	0.115528	6096	2.93804	44254	4.3319	7.61806	0.840207	0.916971	42190	0	0.0827068	0.0619694	1.00013	(+)E1A_r60_3	0	0	0	0	0	0	0	0	0	0	-1	317.818	7.32357	3.54088	-1	1029.52	92.6847	91.1786	52.8138	1.94631	2.49169	0	1	7	30367	2434.37	1	ExtractionEvaluate	37784	20 Bit	0	354	976.117	1	0	12.1353	1	1	0.0248565	1	46.1201	0	-8.01796	1	3.0415	1	2.93804	1	3.54088	1	-1	0	0	0	-1	0	1	1
*
TYPE	integer	integer	integer	integer	integer	text	text	float	float	float	float	float	float	float	boolean	boolean	boolean	boolean	boolean	boolean	float	boolean	boolean	float	float
FEATURES	FeatureNum	Row	Col	SubTypeMask	ControlType	ProbeName	SystematicName	PositionX	PositionY	gProcessedSignal	gProcessedSigError	gMedianSignal	gBGMedianSignal	gBGPixSDev	gIsSaturated	gIsFeatNonUnifOL	gIsBGNonUnifOL	gIsFeatPopnOL	gIsBGPopnOL	IsManualFlag	gBGSubSignal	gIsPosAndSignif	gIsWellAboveBG	SpotExtentX	gBGMeanSignal
DATA	1	1	1	260	1	GE_BrightCorner	GE_BrightCorner	9889.59	191.071	5.098259e+004	5.098260e+003	46049	28	7.637137e+000	0	0	0	0	0	0	45969.3	1	1	53.2255	28.8061
DATA	2	1	2	66	1	DarkCorner	DarkCorner	9914.5	191	5.179207e+000	3.279990e+000	63	28	7.752966e+000	0	0	0	0	0	0	4.6982	1	0	54.1152	28.498
DATA	3	1	3	66	1	DarkCorner	DarkCorner	9939.85	191	4.083964e+000	3.245619e+000	64	27	7.246525e+000	0	0	0	0	0	0	3.72655	1	0	49.8279	27.1159
DATA	4	1	4	66	1	DarkCorner	DarkCorner	9965.63	190.972	3.214018e+000	3.205781e+000	60	27	7.734819e+000	0	0	0	0	0	0	1.51836	0	0	48.2044	27.4553
DATA	5	1	5	66	1	DarkCorner	DarkCorner	9990.7	191.052	5.694344e+000	3.235090e+000	63.5	27	7.331797e+000	0	0	0	0	0	0	5.2535	1	0	49.1849	27.2383
DATA	6	1	6	66	1	DarkCorner	DarkCorner	10016.3	191.25	3.180591e+000	3.182727e+000	61.5	27	7.387965e+000	0	0	0	0	0	0	2.81566	0	0	47.5395	27.5496
DATA	7	1	7	66	1	DarkCorner	DarkCorner	10041.3	191.671	3.165314e+000	3.152994e+000	57	26	6.896209e+000	0	0	0	0	0	0	-1.28396	0	0	51.7088	26.4549
DATA	8	1	8	66	1	DarkCorner	DarkCorner	10067	191.346	3.150932e+000	3.139063e+000	61	25	6.608393e+000	0	0	0	0	0	0	0.465897	0	0	49.5074	25.6415
DATA	9	1	9	66	1	DarkCorner	DarkCorner	10092.4	191.427	3.137378e+000	3.125167e+000	56.5	26	7.011691e+000	0	0	0	0	0	0	-3.07237	0	0	65	27.1617
DATA	10	1	10	66	1	DarkCorner	DarkCorner	10117.7	191.063	3.125023e+000	3.115904e+000	62	26	6.891771e+000	0	0	0	0	0	0	1.29953	0	0	49.8279	26.8421
DATA	11	1	11	66	1	DarkCorner	DarkCorner	10143.6	190.731	3.113176e+000	3.101059e+000	58	26	6.268577e+000	0	0	0	0	0	0	-0.262057	0	0	46.1809	26.4627
DATA	12	1	12	0	0	A_64_P076162	A_64_P076162	10168.1	191.171	6.300444e+001	7.017567e+000	120	25	6.697640e+000	0	0	0	0	0	0	59.898	1	1	46.8651	25.9326
DATA	13	1	13	0	0	A_64_P002176	NM_001170551	10193.8	191.608	5.717815e+002	5.726104e+001	603	25	6.958597e+000	0	0	0	0	0	0	545.42	1	1	49.1849	26.0562
DATA	14	1	14	0	0	A_42_P664913	NM_001108400	10219.1	191.608	5.069742e+002	5.079034e+001	527	26	6.534283e+000	0	0	0	0	0	0	485.042	1	1	49.1849	25.4832
DATA	15	1	15	0	0	A_43_P13320	NM_138880	10244.8	191.679	1.370260e+001	3.354937e+000	72	25	6.594669e+000	0	0	0	0	0	0	13.1464	1	0	51.4001	25.3826
DATA	16	1	16	0	0	A_64_P126523	A_64_P126523	10270	191.455	2.645007e+001	4.040833e+000	85	25	6.394890e+000	0	0	0	0	0	0	25.4385	1	1	55.8519	25.0365
DATA	17	1	17	0	0	A_64_P038045	XM_002730109	10295.4	191.427	4.576119e+001	5.498311e+000	105	24	6.438370e+000	0	0	0	0	0	0	44.1097	1	1	57.5363	24.4854
DATA	18	1	18	0	0	A_43_P11804	NM_017066	10320.7	191.395	1.291343e+004	1.291347e+003	11919	25	6.983570e+000	0	0	0	0	0	0	12472.1	1	1	49.5074	25.2766
DATA	19	1	19	0	0	A_44_P808710	XM_001069205	10346.3	191.5	2.193636e+001	3.746057e+000	83	25	6.396238e+000	0	0	0	0	0	0	21.2244	1	1	65	25.1354
DATA	20	1	20	0	0	A_64_P142111	NM_001100887	10371.6	191.523	7.980683e+002	7.986441e+001	837	25	6.352622e+000	0	0	0	0	0	0	773.329	1	1	52.9257	25.284
DATA	21	1	21	0	0	A_64_P095642	A_64_P095642	10396.8	191.481	1.436950e+002	1.468511e+001	196	26	6.914832e+000	0	0	0	0	0	0	139.415	1	1	49.8279	25.8585
DATA	22	1	22	0	0	A_42_P735279	NM_001004446	10422.3	191.627	1.779215e+004	1.779217e+003	17106	25	6.803519e+000	0	0	0	0	0	0	17280.4	1	1	49.1849	25.9922
DATA	23	1	23	0	0	A_44_P902822	XM_001063709	10448	191.5	4.210938e+001	5.183471e+000	101.5	27	7.200057e+000	0	0	0	0	0	0	40.9307	1	1	48.5334	27.4058
DATA	24	1	24	0	0	A_42_P563843	NM_022263	10472.7	191.774	6.965685e+000	3.100137e+000	67	27	7.073013e+000	0	0	0	0	0	0	6.77469	1	0	51.4001	26.9084
DATA	25	1	25	0	0	A_42_P610788	NM_031544	10498.4	191.466	6.206797e+003	6.206870e+002	5975.5	26	6.338191e+000	0	0	0	0	0	0	6038.45	1	1	49.1849	26.4702
DATA	26	1	26	0	0	A_44_P242429	NM_001134842	10523.6	191.527	2.452457e+003	2.452643e+002	2314	27	6.406424e+000	0	0	0	0	0	0	2386.23	1	1	49.1849	27.688
DATA	27	1	27	0	0	A_64_P020571	NM_001031659	10549.4	191.573	3.474751e+002	3.487850e+001	377	26	6.616453e+000	0	0	0	0	0	0	338.055	1	1	57.5363	26.4423
DATA	28	1	28	0	0	A_42_P518462	NM_001007020	10574.7	191.468	6.749802e+003	6.749869e+002	6450	26	6.793338e+000	0	0	0	0	0	0	6564.57	1	1	49.8279	26.222
DATA	29	1	29	0	0	A_42_P469751	XM_001054007	10600.1	191.5	2.460487e+002	2.478983e+001	295	28	7.968862e+000	0	0	0	0	0	0	239.166	1	1	56.9804	28.9115
DATA	30	1	30	0	0	A_44_P209459	NM_022387	10625.2	191.632	7.647308e+003	7.647368e+002	7146	32	9.035966e+000	0	0	0	0	0	0	7427.94	1	1	49.5074	32.8897
DATA	31	1	31	0	0	A_64_P018547	NM_001108717	10650.5	192	1.051927e+003	1.052362e+002	1012	36	9.240275e+000	0	0	0	0	0	0	1020.81	1	1	48.5334	37.2414
DATA	32	1	32	0	0	A_64_P111513	A_64_P111513	10676.2	191.829	1.870220e+001	3.561782e+000	76	31	9.941983e+000	0	0	0	0	0	0	18.127	1	1	50.7771	31.6115
DATA	33	1	33	0	0	A_42_P493925	NM_198785	10701.5	191.71	4.669998e+002	4.679853e+001	493	25	6.487911e+000	0	0	0	0	0	0	452.005	1	1	46.8651	25.6004
DATA	34	1	34	0	0	A_64_P049828	NM_012543	10727.3	191.753	2.051668e+003	2.051894e+002	2060	27	6.974429e+000	0	0	0	0	0	0	1982.61	1	1	48.2044	26.7495
DATA	35	1	35	0	0	A_64_P137927	NM_001191885	10752.1	191.73	2.507535e+002	2.525964e+001	296.5	26	6.374510e+000	0	0	0	0	0	0	241.891	1	1	48.2044	25.6647
DATA	36	1	36	0	0	A_43_P19848	NM_001106018	10777.6	191.573	6.369612e+001	7.062953e+000	122	26	6.993207e+000	0	0	0	0	0	0	61.3222	1	1	57.5363	26.6267
DATA	37	1	37	0	0	A_44_P308673	NM_139108	10803.1	191.842	2.722438e+002	2.739562e+001	315	26	7.489904e+000	0	0	0	0	0	0	261.539	1	1	48.2044	26.126
DATA	38	1	38	0	0	A_64_P004269	NM_001191660	10828.5	191.907	1.694178e+003	1.694455e+002	1669.5	24	7.116092e+000	0	0	0	0	0	0	1623.75	1	1	48.8603	24.8105
DATA	39	1	39	0	0	A_42_P543670	NM_012572	10854	191.757	3.924512e+002	3.936527e+001	420	23	6.567046e+000	0	0	0	1	0	0	375.172	1	1	46.8651	23.6455
DATA	40	1	40	0	0	A_64_P164696	TC605704	10878.8	191.5	3.412266e+002	3.426153e+001	403	23	6.680729e+000	0	0	0	0	0	0	325.328	1	1	42.9674	23.7529
DATA	41	1	41	0	0	A_64_P055763	NM_001191822	10904.4	191.74	1.035470e+004	1.035475e+003	9548	25	8.329590e+000	0	0	0	0	0	0	9843.89	1	1	49.5074	26.5113
DATA	42	1	42	0	0	A_64_P068622	NM_001013056	10929.9	191.706	1.386992e+003	1.387339e+002	1342	27	7.002518e+000	0	0	0	0	0	0	1314.52	1	1	51.7088	26.9235
DATA	43	1	43	0	0	A_44_P915877	XM_001065403	10955.7	192.013	2.508343e+002	2.527550e+001	296	26	6.949365e+000	0	0	0	0	0	0	236.964	1	1	49.1849	27.0097
DATA	44	1	44	0	0	A_42_P647599	NM_024129	10981	191.971	6.400296e+002	6.407899e+001	654	26	6.596003e+000	0	0	0	0	0	0	602.591	1	1	46.8651	26.2382
DATA	45	1	45	0	0	A_42_P798776	XM_002725203	11006.2	192.026	4.468617e+003	4.468727e+002	4235	28	8.223136e+000	0	0	0	0	0	0	4192.51	1	1	49.1849	28.6191
DATA	46	1	46	0	0	A_42_P781735	NM_053319	11031.5	192	6.240586e+004	6.240587e+003	61350.5	28	8.369721e+000	0	0	0	1	0	0	58334.3	1	1	54.1152	29.0741
DATA	47	1	47	0	0	A_42_P553611	TC630296	11057.2	192.026	4.251534e+003	4.251651e+002	3932.5	28	7.534786e+000	0	0	0	0	0	0	3958.73	1	1	49.1849	28.1294
DATA	48	1	48	0	0	A_43_P12729	NM_032615	11082.3	192.012	3.224555e+003	3.224711e+002	3044	27	7.660514e+000	0	0	0	0	0	0	2990.63	1	1	49.1849	27.2577
DATA	49	1	49	0	0	A_42_P507072	FQ213070	11107.7	191.986	3.375202e+003	3.375352e+002	3169	28	1.090577e+001	0	0	0	0	0	0	3117.43	1	1	47.2035	30.3653
DATA	50	1	50	0	0	A_42_P645467	NM_001108804	11133.5	192	1.594884e+002	1.626568e+001	192.5	24	6.833027e+000	0	0	0	1	0	0	146.67	1	1	54.1152	25.0453
DATA	51	1	51	0	0	A_42_P738431	NM_019175	11158.4	191.973	1.640990e+003	1.641303e+002	1538	25	6.437167e+000	0	0	0	0	0	0	1502.59	1	1	48.5334	25.1039
DATA	52	1	52	0	0	A_42_P712297	NM_001135583	11183.8	191.897	2.410984e+003	2.411199e+002	2271	24	6.668413e+000	0	0	0	1	0	0	2197.64	1	1	46.5243	24.5374
DATA	53	1	53	0	0	A_42_P657538	NM_001008362	11209.1	192.099	2.590512e+003	2.590714e+002	2394	24	6.778981e+000	0	0	0	0	0	0	2350.47	1	1	46.8651	24.3526
DATA	54	1	54	0	0	A_42_P515405	NM_212505	11234.8	192.069	2.503763e+002	2.524817e+001	288	24	6.702724e+000	0	0	0	0	0	0	226.081	1	1	46.8651	25.0116
DATA	55	1	55	0	0	A_64_P089886	NM_053476	11259.9	192.211	3.441275e+003	3.441431e+002	3058	26	6.665680e+000	0	0	0	0	0	0	3092.51	1	1	47.2035	26.1202
DATA	56	1	56	0	0	A_42_P528580	NM_001107528	11285.4	192.194	5.573279e+003	5.573376e+002	4839	26	6.471491e+000	0	0	0	0	0	0	4983.37	1	1	47.8731	26.3186
DATA	57	1	57	0	0	A_43_P14285	NM_001034145	11310.7	191.9	1.022409e+004	1.022415e+003	9049.5	27	7.743859e+000	0	0	0	0	0	0	9095.18	1	1	47.2035	27.869
DATA	58	1	58	0	0	A_42_P616287	NM_001134555	11336.5	192	2.089977e+002	2.116184e+001	236	28	9.200397e+000	0	0	0	0	0	0	184.947	1	1	54.1152	28.9731
DATA	59	1	59	0	0	A_42_P496411	NM_001109410	11361.9	192.2	4.533878e+003	4.534001e+002	3972.5	31	1.133036e+001	0	0	0	1	0	0	3991.16	1	1	46.8651	32.6708
DATA	60	1	60	0	0	A_44_P494310	NM_001009604	11387.1	192.211	6.148172e+003	6.148264e+002	5183.5	24	6.252064e+000	0	0	0	0	0	0	5383.48	1	1	47.2035	23.9214
DATA	61	1	61	0	0	A_42_P645142	NM_019375	11412.4	192.307	6.304771e+002	6.313790e+001	585	25	6.649956e+000	0	0	0	1	0	0	549.093	1	1	47.8731	25.3877
DATA	62	1	62	0	0	A_64_P042132	AABR03024196	11437.9	192.113	9.824545e+003	9.824603e+002	8469	26	7.221349e+000	0	0	0	0	0	0	8508.75	1	1	49.8279	26.3404
DATA	63	1	63	0	0	A_42_P508085	NM_001009620	11463	192.183	3.315079e+003	3.315254e+002	2670	26	6.751633e+000	0	0	0	0	0	0	2855.29	1	1	46.8651	25.7311
DATA	64	1	64	0	0	A_64_P051159	NM_001100684	11488.6	192.069	1.239164e+003	1.239639e+002	1078	25	6.235701e+000	0	0	0	0	0	0	1061.2	1	1	53.8203	24.7052
DATA	65	1	65	0	0	A_64_P124041	ENSRNOT00000019667	11514.4	192.427	2.435815e+002	2.460132e+001	262	26	6.485364e+000	0	0	0	0	0	0	207.409	1	1	57.5363	26.276
DATA	66	1	66	0	0	A_64_P131122	XR_086302	11539.5	192.352	1.232762e+002	1.280674e+001	168	27	7.061213e+000	0	0	0	0	0	0	104.372	1	1	57.5363	26.7911
DATA	67	1	67	0	0	A_64_P021601	NM_031737	11564.7	192.068	1.312982e+002	1.358588e+001	171	27	7.805350e+000	0	0	0	0	0	0	110.516	1	1	47.8731	27.4751
DATA	68	1	68	0	0	A_44_P776423	NM_001017386	11590.1	192.282	5.663282e+003	5.663391e+002	4626.5	28	6.952174e+000	0	0	0	0	0	0	4739.36	1	1	47.2035	27.7143
DATA	69	1	69	0	0	A_64_P120445	NM_080694	11615.6	192.188	7.240303e+001	8.055762e+000	125	26	7.092991e+000	0	0	0	0	0	0	60.2315	1	1	46.8651	27.0628
DATA	70	1	70	0	0	A_42_P772878	NM_001011936	11640.8	192.519	3.086791e+003	3.086995e+002	2587	25	6.103432e+000	0	0	0	1	0	0	2553.07	1	1	49.8279	25.6301
DATA	71	1	71	0	0	A_42_P736315	NM_001108321	11666.6	192.483	1.907819e+003	1.908154e+002	1640.5	24	6.302241e+000	0	0	0	0	0	0	1568.45	1	1	52.9257	24.2977
DATA	73	1	73	0	0	A_64_P041004	NM_001108599	11717.1	192.257	2.515673e+004	2.515675e+003	19825.5	25	6.632518e+000	0	0	0	0	0	0	20436.4	1	1	48.2044	25.1398
DATA	74	1	74	0	0	A_42_P494276	NM_001109663	11742.4	192.447	5.912331e+002	5.923513e+001	545	25	6.864971e+000	0	0	0	0	0	0	477.478	1	1	49.8279	25.4933
DATA	75	1	75	66	1	DarkCorner	DarkCorner	11768.4	192.582	3.674496e+000	3.660194e+000	58	27	6.654136e+000	0	0	0	0	0	0	-5.09803	0	0	50.1463	27.0158
DATA	76	1	76	66	1	DarkCorner	DarkCorner	11793.3	192.256	3.696333e+000	3.681946e+000	60.5	27	6.759270e+000	0	0	0	0	0	0	-1.91648	0	0	51.4001	27.5198
DATA	77	1	77	66	1	DarkCorner	DarkCorner	11818.7	192.457	3.718215e+000	3.703744e+000	60	27	7.191274e+000	0	0	0	0	0	0	-1.54907	0	0	46.8651	28.0751
DATA	78	1	78	66	1	DarkCorner	DarkCorner	11844.4	192.427	3.740628e+000	3.726069e+000	62	28	7.512341e+000	0	0	0	0	0	0	-1.04092	0	0	57.5363	28.1092
DATA	79	1	79	66	1	DarkCorner	DarkCorner	11869.2	192.78	3.761831e+000	3.747190e+000	58	28	7.963544e+000	0	0	0	0	0	0	-4.50919	0	0	51.0895	28.657
DATA	80	1	80	66	1	DarkCorner	DarkCorner	11895.2	192.293	3.785021e+000	3.770289e+000	58	28	7.067323e+000	0	0	0	0	0	0	-3.47881	0	0	49.1849	28.0363
DATA	81	1	81	66	1	DarkCorner	DarkCorner	11920.3	192.37	4.570985e+000	3.819371e+000	66	28	6.854564e+000	0	0	0	1	0	0	3.54167	1	0	51.0895	27.9434
DATA	82	1	82	66	1	DarkCorner	DarkCorner	11945.9	192.575	3.828741e+000	3.813839e+000	61	28	7.358204e+000	0	0	0	0	0	0	-1.38227	0	0	50.4627	28.4524
DATA	83	1	83	66	1	DarkCorner	DarkCorner	11971.1	192.461	3.850661e+000	3.844577e+000	63	28	7.551939e+000	0	0	0	0	0	0	2.00293	0	0	49.1849	28.4023
DATA	84	1	84	260	1	GE_BrightCorner	GE_BrightCorner	11996.7	192.5	5.428088e+004	5.428089e+003	41112	29	7.725445e+000	0	0	0	0	0	0	41342.5	1	1	57.5363	29.3107
DATA	85	1	85	260	1	GE_BrightCorner	GE_BrightCorner	12022.4	192.696	5.373446e+004	5.373447e+003	39753	29	8.210623e+000	0	0	0	0	0	0	40698.3	1	1	53.2255	29.987
DATA	86	2	1	260	1	GE_BrightCorner	GE_BrightCorner	9902.13	198.627	5.135689e+004	5.135690e+003	46083	30	8.666742e+000	0	0	0	0	0	0	46515.3	1	1	45.835	30.5048
DATA	87	2	2	66	1	DarkCorner	DarkCorner	9928.05	198.42	3.236793e+000	3.224195e+000	58	27	8.382019e+000	0	0	0	0	0	0	0.0160396	0	0	52.6241	28.3894
DATA	88	2	3	66	1	DarkCorner	DarkCorner	9952.49	198.603	3.218904e+000	3.206376e+000	56	27	7.597156e+000	0	0	0	0	0	0	-1.7943	0	0	49.8279	27.4293
DATA	89	2	4	66	1	DarkCorner	DarkCorner	9977.89	198.5	3.201428e+000	3.191254e+000	58	28	8.045001e+000	0	0	0	0	0	0	1.11274	0	0	56.9804	28.5665
DATA	90	2	5	66	1	DarkCorner	DarkCorner	10003.8	198.443	3.184524e+000	3.172130e+000	55.5	27	7.155934e+000	0	0	0	0	0	0	-2.65513	0	0	50.1463	27.622
DATA	91	2	6	66	1	DarkCorner	DarkCorner	10028.6	198.573	3.169223e+000	3.156889e+000	54.5	28	7.402750e+000	0	0	0	0	0	0	-4.84235	0	0	57.5363	27.9337
DATA	92	2	7	66	1	DarkCorner	DarkCorner	10054.1	199.324	3.154017e+000	3.141742e+000	57.5	25.5	6.689559e+000	0	0	0	0	0	0	-2.67177	0	0	45.835	25.8186
DATA	93	2	8	66	1	DarkCorner	DarkCorner	10079.5	198.5	3.140613e+000	3.128389e+000	56	27	6.658119e+000	0	0	0	0	0	0	-2.873	0	0	57.5363	27.0852
DATA	94	2	9	66	1	DarkCorner	DarkCorner	10104.9	198.5	3.127656e+000	3.115483e+000	57.5	26	7.418547e+000	0	0	0	0	0	0	-4.16665	0	0	56.9804	26.7424
DATA	95	2	10	66	1	DarkCorner	DarkCorner	10130.4	198.573	3.115468e+000	3.103342e+000	54	27	6.761250e+000	0	0	0	0	0	0	-4.24832	0	0	57.5363	27.2372
DATA	96	2	11	0	0	A_44_P212746	ENSRNOT00000049707	10155.5	198.386	1.591431e+001	3.477824e+000	73	27	6.248320e+000	0	0	0	0	0	0	15.1202	1	1	47.5395	26.4596
DATA	97	2	12	0	0	A_64_P103615	NM_001107179	10181	198.545	1.043201e+002	1.087772e+001	159.5	26.5	7.064102e+000	0	0	0	0	0	0	99.4513	1	1	55.8519	27.0586
DATA	98	2	13	0	0	A_44_P550697	NM_001106400	10206.5	198.782	3.017607e+002	3.033205e+001	340.5	26	7.270118e+000	0	0	0	0	0	0	288.585	1	1	49.8279	26.0429
DATA	99	2	14	0	0	A_64_P045429	A_64_P045429	10231.6	198.573	8.425220e+001	8.964939e+000	139	26	6.788914e+000	0	0	0	0	0	0	80.7984	1	1	57.5363	25.4533
DATA	100	2	15	0	0	A_64_P075175	ENSRNOT00000044322	10257	199.03	2.434040e+002	2.453142e+001	296	26	6.716862e+000	0	0	0	0	0	0	234.05	1	1	46.8651	26.0704
DATA	101	2	16	0	0	A_44_P472801	NM_173121	10282.4	199	3.502920e+003	3.503053e+002	3257	25	6.008034e+000	0	0	0	0	0	0	3376.22	1	1	48.5334	24.8663
DATA	102	2	17	0	0	A_42_P491486	NM_022533	10307.7	198.757	4.563933e+003	4.564034e+002	4231	25	7.193373e+000	0	0	0	0	0	0	4407.98	1	1	48.8603	25.1961
DATA	103	2	18	0	0	A_43_P12736	NM_033299	10333.3	198.851	8.993089e+001	9.491806e+000	145	25	6.850367e+000	0	0	0	0	0	0	87.0223	1	1	45.835	25.652
DATA	104	2	19	0	0	A_64_P158790	A_64_P158790	10358.8	198.974	3.276861e+004	3.276862e+003	32225.5	26	6.413794e+000	0	0	0	0	0	0	31760.9	1	1	49.1849	25.701
DATA	105	2	20	0	0	A_44_P229481	NM_001191077	10384.2	198.897	2.706383e+002	2.723260e+001	326.5	26	7.403128e+000	0	0	0	0	0	0	262.674	1	1	46.5243	26.5226
DATA	106	2	21	0	0	A_64_P133836	ENSRNOT00000039319	10409.5	199	3.035435e+000	3.036934e+000	61.5	25	7.154392e+000	0	0	0	0	0	0	2.76012	0	0	54.1152	25.4271
DATA	107	2	22	0	0	A_43_P13137	NM_130818	10435	199	1.554648e+001	3.397430e+000	75	27	7.808289e+000	0	0	0	0	0	0	15.1202	1	1	65	28.0386
DATA	108	2	23	0	0	A_42_P586141	NM_017035	10460.2	199	3.223956e+002	3.238059e+001	374	26	6.364324e+000	0	0	0	0	0	0	313.767	1	1	46.8651	26.455
DATA	109	2	24	0	0	A_44_P142850	NM_001106975	10485.5	199	5.394817e+001	6.181358e+000	111	27	7.222028e+000	0	0	0	0	0	0	52.528	1	1	54.1152	27.0143
DATA	110	2	25	0	0	A_44_P1042504	NM_001044232	10511.5	199	1.651109e+002	1.678443e+001	218	28	7.552540e+000	0	0	0	0	0	0	160.801	1	1	54.1152	28.9059
DATA	111	2	26	0	0	A_42_P476474	NM_001033926	10536.5	198.873	4.466467e+003	4.466569e+002	4291	26	6.360236e+000	0	0	0	0	0	0	4349.8	1	1	47.8731	27.1209
DATA	112	2	27	0	0	A_44_P480882	ENSRNOT00000035496	10562	199	9.717417e+000	3.170072e+000	68	26.5	6.784138e+000	0	0	0	0	0	0	9.46164	1	0	54.9904	26.5098
DATA	113	2	28	0	0	A_44_P1042696	NM_001106377	10587.3	198.986	8.689277e+003	8.689329e+002	8268	28	7.116102e+000	0	0	0	0	0	0	8456.85	1	1	47.2035	28.0758
DATA	114	2	29	0	0	A_64_P132576	NM_001012357	10612.7	199.095	2.289298e+002	2.309141e+001	279	31	8.897089e+000	0	0	0	0	0	0	222.664	1	1	48.8603	31.74
DATA	115	2	30	0	0	A_42_P652357	NM_021868	10638.1	199.132	2.846932e+004	2.846934e+003	27157	37	9.516407e+000	0	0	0	0	0	0	27666.3	1	1	47.8731	38.0603
DATA	116	2	31	0	0	A_64_P134935	NM_001107976	10663.4	199.26	1.212977e+001	3.260517e+000	73	36	9.078102e+000	0	0	0	0	0	0	11.7753	1	0	47.8731	36.0896
DATA	117	2	32	0	0	A_64_P034019	NM_001107145	10689	199	8.181406e+001	8.724634e+000	136	26	7.506802e+000	0	0	0	0	0	0	79.3183	1	1	54.9904	26.3707
DATA	118	2	33	0	0	A_64_P140634	A_64_P140634	10714.4	199	3.762719e+003	3.762841e+002	3684	26	7.024440e+000	0	0	0	0	0	0	3642.55	1	1	48.5334	26.5805
DATA	120	2	35	0	0	A_42_P746029	NM_144748	10765.4	199.069	1.909408e+002	1.933547e+001	211.5	28	7.421225e+000	0	0	0	1	0	0	184.187	1	1	53.8203	27.5911
DATA	121	2	36	0	0	A_64_P009032	NM_001105801	10790.2	199.103	3.659013e+004	3.659014e+003	34762.5	26	7.534127e+000	0	0	0	0	0	0	35225.2	1	1	46.5243	26.4856
DATA	122	2	37	0	0	A_42_P764792	NM_001014036	10815.9	199.2	3.554640e+002	3.567776e+001	397	26	8.354037e+000	0	0	0	0	0	0	341.431	1	1	47.8731	26.7039
DATA	123	2	38	0	0	A_64_P029278	NM_001108687	10841.2	199.028	4.188024e+002	4.199234e+001	461	24	6.271776e+000	0	0	0	0	0	0	401.285	1	1	46.8651	24.598
DATA	124	2	39	0	0	A_43_P12266	NM_022622	10865.7	198.509	2.596723e+002	2.614857e+001	289	23	6.517833e+000	0	0	0	0	0	0	248.168	1	1	42.2201	23.5333
DATA	125	2	40	0	0	A_44_P204710	ENSRNOT00000049315	10892.1	199.386	4.587410e+001	5.910479e+000	86	25	6.455723e+000	0	0	0	0	0	0	43.7205	1	1	57.259	25.0201
DATA	126	2	41	0	0	A_64_P163837	NM_001013149	10917.8	199.403	2.421350e+002	2.441012e+001	283	25	7.447812e+000	0	0	0	0	0	0	230.079	1	1	46.5243	25.6766
DATA	127	2	42	0	0	A_64_P016202	XM_001080153	10942.5	200.4	1.792616e+002	1.819239e+001	221	28	7.259559e+000	0	0	0	0	0	0	169.843	1	1	40.6843	28.6503
DATA	128	2	43	0	0	A_64_P137168	NM_053912	10967.7	199.222	7.596328e+003	7.596392e+002	6938.5	26	7.276818e+000	0	0	0	0	0	0	7172.51	1	1	47.5395	26.4293
DATA	129	2	44	0	0	A_42_P830598	XM_001063895	10993.7	199.1	9.278579e+002	9.283832e+001	920	27	7.275130e+000	0	0	0	0	0	0	872.992	1	1	47.2035	27.8798
DATA	130	2	45	0	0	A_42_P525886	NM_001105716	11019	199.455	3.723926e+002	3.737088e+001	376	30	9.974975e+000	0	0	0	1	0	0	349.136	1	1	65	31.2649
DATA	131	2	46	0	0	A_42_P836392	NM_134383	11044.3	199.446	8.235066e+003	8.235126e+002	7589	29	8.430652e+000	0	0	0	0	0	0	7691.92	1	1	48.5334	30.0539
DATA	132	2	47	0	0	A_44_P146783	NM_001001366	11069.6	199.427	1.083973e+002	1.129031e+001	159	26	7.304123e+000	0	0	0	0	0	0	100.855	1	1	57.5363	27.128
DATA	133	2	48	0	0	A_44_P294675	NM_053687	11095.7	199.299	3.039761e+002	3.056256e+001	323.5	31	1.142592e+001	0	0	0	0	0	0	281.646	1	1	49.8279	32.4293
DATA	134	2	49	0	0	A_64_P047137	NM_001001283	11120.6	199.427	1.971553e+001	3.744913e+000	79	26	8.359578e+000	0	0	0	0	0	0	18.193	1	1	57.5363	27.1961
DATA	135	2	50	0	0	A_44_P170396	NM_017267	11146	199.455	3.256623e+001	4.412140e+000	83	25	6.976544e+000	0	0	0	0	0	0	29.9219	1	1	55.8519	25.7805
DATA	136	2	51	0	0	A_64_P077603	ENSRNOT00000037503	11172	199.158	1.966821e+002	1.992882e+001	227	24	6.707268e+000	0	0	0	0	0	0	179.884	1	1	48.2044	25.0874
DATA	137	2	52	0	0	A_42_P648800	AA998304	11195.7	198.877	2.862257e+002	2.880383e+001	304	24	6.404923e+000	0	0	0	1	0	0	260.654	1	1	42.9674	24.4429
DATA	138	2	53	0	0	A_64_P143186	A_64_P143186	11222.2	199.625	6.365081e+001	7.143018e+000	121	25	6.643939e+000	0	0	0	0	0	0	57.6889	1	1	50.4627	25.2326
DATA	139	2	54	0	0	A_42_P622681	NM_001030020	11247.3	199.5	3.700819e+003	3.700962e+002	3284	27	7.717715e+000	0	0	0	1	0	0	3338.26	1	1	50.4627	28.0052
DATA	140	2	55	0	0	A_42_P506076	NM_019253	11272.7	199.5	2.714127e+004	2.714129e+003	23265.5	26	6.727362e+000	0	0	0	1	0	0	24362.1	1	1	50.4627	26.4372
DATA	141	2	56	0	0	A_64_P158975	NM_001109536	11297.3	200.314	1.833101e+002	1.862366e+001	222	27	7.036768e+000	0	0	0	0	0	0	163.77	1	1	40.2912	27.5344
DATA	142	2	57	0	0	A_42_P655425	NM_001106406	11323.7	199.373	7.710351e+002	7.717439e+001	735	28	9.249504e+000	0	0	0	0	0	0	685.07	1	1	49.1849	28.9756
DATA	143	2	58	0	0	A_44_P408520	NM_031569	11349.4	199.38	1.871004e+002	1.900304e+001	228	34	1.197507e+001	0	0	0	0	0	0	165.37	1	1	47.8731	35.3861
DATA	144	2	59	0	0	A_64_P031259	NM_001002022	11374.7	199.308	2.291117e+002	2.315359e+001	261	24	5.951443e+000	0	0	0	0	0	0	201.434	1	1	50.7771	24.7085
DATA	145	2	60	0	0	A_43_P10227	NM_024397	11399.5	199.5	9.624263e+003	9.624321e+002	8022	24	6.740257e+000	0	0	0	0	0	0	8417.58	1	1	49.1849	24.6346
DATA	146	2	61	0	0	A_42_P542744	NM_001107544	11425.2	199.545	5.040325e+003	5.040439e+002	4299.5	26	6.932747e+000	0	0	0	1	0	0	4384.18	1	1	52.6241	26.9552
DATA	147	2	62	0	0	A_64_P052387	A_64_P052387	11450.6	199.573	9.845858e+001	1.041522e+001	143	27	7.950743e+000	0	0	0	0	0	0	85.1701	1	1	57.5363	27.3695
DATA	149	2	64	0	0	A_64_P064823	ENSRNOT00000050238	11501.1	199.569	3.779580e+002	3.795154e+001	381	26	6.368106e+000	0	0	0	0	0	0	323.309	1	1	47.8731	25.8714
DATA	150	2	65	0	0	A_42_P730292	NM_001004244	11526.9	199.5	2.031923e+003	2.032217e+002	1720	26	7.088609e+000	0	0	0	0	0	0	1728.07	1	1	56.9804	27.1408
DATA	151	2	66	0	0	A_64_P052878	FM104687	11552.1	199.648	3.377391e+002	3.395214e+001	354	28	8.060132e+000	0	0	0	0	0	0	285.606	1	1	47.8731	27.6952
DATA	152	2	67	0	0	A_64_P157171	XM_001063008	11577.5	199.738	2.362807e+003	2.363065e+002	2072	27	6.215324e+000	0	0	0	0	0	0	1986.59	1	1	50.7771	27.5026
DATA	153	2	68	0	0	A_44_P693350	ENSRNOT00000030985	11603.1	199.5	4.498494e+001	5.709085e+000	101	28	7.592620e+000	0	0	0	0	0	0	37.598	1	1	56.9804	29.0219
DATA	154	2	69	0	0	A_64_P090168	NM_001000720	11628.5	199.648	6.236267e+001	7.168907e+000	116.5	25	7.402051e+000	0	0	0	0	0	0	51.819	1	1	65	26.56
DATA	155	2	70	0	0	A_42_P726392	NM_001106353	11653.9	199.5	1.342524e+003	1.342995e+002	1128.5	25	6.572798e+000	0	0	0	1	0	0	1108.95	1	1	56.9804	25.6066
DATA	156	2	71	0	0	A_64_P015727	FQ218047	11679.4	199.853	2.914826e+003	2.915045e+002	2450	24	6.381079e+000	0	0	0	0	0	0	2393.65	1	1	48.8603	24.6172
DATA	157	2	72	0	0	A_44_P897023	NM_001008364	11704.5	199.712	7.513570e+002	7.522184e+001	695	26	6.728280e+000	0	0	0	0	0	0	613.393	1	1	48.5334	26.607
DATA	158	2	73	0	0	A_44_P104776	NM_001001425	11730.1	199.614	6.447731e+001	7.394715e+000	114	23	5.542097e+000	0	0	0	0	0	0	52.3223	1	1	57.259	23.5327
DATA	159	2	74	0	0	A_64_P142521	A_64_P142521	11755	199.929	1.241919e+001	3.847365e+000	72	27	6.827391e+000	0	0	0	0	0	0	10.0203	1	0	46.8651	27.0758
DATA	160	2	75	66	1	DarkCorner	DarkCorner	11780.6	199.573	3.677895e+000	3.663580e+000	56.5	27	6.244647e+000	0	0	0	0	0	0	-4.71779	0	0	57.5363	27.2359
DATA	161	2	76	66	1	DarkCorner	DarkCorner	11805.9	199.541	3.699707e+000	3.685307e+000	57	27	5.545395e+000	0	0	0	0	0	0	-4.5082	0	0	51.7088	27.239
DATA	162	2	77	66	1	DarkCorner	DarkCorner	11831.7	199.667	3.721816e+000	3.707330e+000	59	29	7.125828e+000	0	0	0	0	0	0	-3.32762	0	0	48.8603	28.7762
DATA	163	2	78	66	1	DarkCorner	DarkCorner	11857.2	199.887	3.743592e+000	3.729022e+000	59	29	7.296852e+000	0	0	0	0	0	0	-4.67877	0	0	49.1849	28.8447
DATA	164	2	79	66	1	DarkCorner	DarkCorner	11882.5	200	3.765288e+000	3.750633e+000	60	28	7.476819e+000	0	0	0	0	0	0	-2.07438	0	0	54.1152	28.9366
DATA	165	2	80	66	1	DarkCorner	DarkCorner	11907.5	200.152	3.786690e+000	3.771952e+000	57	28	6.783036e+000	0	0	0	0	0	0	-3.38231	0	0	45.835	28.203
DATA	166	2	81	66	1	DarkCorner	DarkCorner	11933.2	199.394	3.809669e+000	3.795042e+000	64	30	7.959984e+000	0	0	0	0	0	0	0.301838	0	0	44.7812	29.7547
DATA	167	2	82	66	1	DarkCorner	DarkCorner	11958.5	200	3.830672e+000	3.815763e+000	58	28	7.440047e+000	0	0	0	0	0	0	-3.7224	0	0	54.1152	28.4804
DATA	168	2	83	66	1	DarkCorner	DarkCorner	11984	200	3.852439e+000	3.837445e+000	63	28	7.644309e+000	0	0	0	0	0	0	-0.414106	0	0	65	28.3224
DATA	169	2	84	66	1	DarkCorner	DarkCorner	12009.5	200	8.647685e+000	3.954697e+000	68	30	8.224522e+000	0	0	0	1	0	0	6.58391	1	0	54.1152	31.0383
DATA	170	2	85	260	1	GE_BrightCorner	GE_BrightCorner	12035.1	200.216	4.999065e+004	4.999067e+003	36872.5	29	7.236525e+000	0	0	0	0	0	0	37852.8	1	1	47.5395	29.8601
DATA	171	3	1	66	1	DarkCorner	DarkCorner	9889	205.545	5.641163e+000	3.298612e+000	64	27	7.153976e+000	0	0	0	0	0	0	5.09965	1	0	65	27.9251
DATA	172	3	2	66	1	DarkCorner	DarkCorner	9914.5	205.648	3.242730e+000	3.233043e+000	59	33	9.631867e+000	0	0	0	0	0	0	1.25247	0	0	57.5363	33.6415
DATA	173	3	3	66	1	DarkCorner	DarkCorner	9939.58	205.573	3.224151e+000	3.211602e+000	57	27	7.445710e+000	0	0	0	0	0	0	-1.1108	0	0	57.5363	27.2456
DATA	174	3	4	66	1	DarkCorner	DarkCorner	9965.44	205.658	3.205894e+000	3.193417e+000	54	30	9.925274e+000	0	0	0	0	0	0	-2.77309	0	0	48.5334	29.7755
DATA	175	3	5	66	1	DarkCorner	DarkCorner	9991.07	205.733	3.188779e+000	3.176368e+000	56	30	6.806527e+000	0	0	0	0	0	0	-4.45281	0	0	48.8603	30.1
DATA	176	3	6	66	1	DarkCorner	DarkCorner	10016	206.074	3.172893e+000	3.160544e+000	58	28.5	7.012554e+000	0	0	0	0	0	0	-2.31472	0	0	50.4627	28.74
DATA	177	3	7	66	1	DarkCorner	DarkCorner	10041.3	206.132	3.157868e+000	3.145578e+000	57	28	8.078342e+000	0	0	0	0	0	0	-2.37957	0	0	45.835	28.6863
DATA	178	3	8	66	1	DarkCorner	DarkCorner	10066.3	206.52	3.143667e+000	3.131432e+000	55	26	6.411881e+000	0	0	0	0	0	0	-3.62748	0	0	47.8731	26.6379
DATA	179	3	9	66	1	DarkCorner	DarkCorner	10092.2	205.959	3.130375e+000	3.118191e+000	60	26	6.068788e+000	0	0	0	0	0	0	-1.2902	0	0	47.5395	27.6667
DATA	180	3	10	66	1	DarkCorner	DarkCorner	10117.5	206.013	3.117961e+000	3.105826e+000	53	28	6.258020e+000	0	0	0	0	0	0	-6.55957	0	0	49.8279	28.5745
DATA	181	3	11	0	0	A_64_P269465	ENSRNOT00000055742	10143	206	1.712253e+001	3.536417e+000	76	29	5.504173e+000	0	0	0	0	0	0	16.2581	1	1	54.9904	28.9
DATA	182	3	12	0	0	A_64_P140776	NM_001114502	10167.9	206	5.550557e+003	5.550643e+002	5242	29	6.900906e+000	0	0	0	0	0	0	5288.3	1	1	46.8651	29.4828
DATA	183	3	13	0	0	A_42_P662683	NM_001108855	10193.4	206.027	1.439904e+004	1.439907e+003	13532	27	7.705960e+000	0	0	0	0	0	0	13763.1	1	1	48.5334	28
DATA	184	3	14	0	0	A_44_P308687	NM_181389	10219.5	206	1.365273e+002	1.399243e+001	186.5	26	6.073968e+000	0	0	0	0	0	0	130.894	1	1	54.1152	25.8889
DATA	185	3	15	0	0	A_42_P705255	NM_078622	10244.5	206	1.393573e+002	1.426694e+001	190	26	7.641194e+000	0	0	0	0	0	0	133.964	1	1	65	26.9298
DATA	186	3	16	0	0	A_44_P142472	NM_001106072	10270	206.195	8.584490e+003	8.584544e+002	8285	27	6.357016e+000	0	0	0	0	0	0	8272.92	1	1	51.4001	26.7368
DATA	187	3	17	0	0	A_64_P015946	NM_001009720	10295.3	205.909	9.707439e+002	9.712204e+001	989.5	26	6.819327e+000	0	0	0	0	0	0	937.544	1	1	49.1849	27.2542
DATA	188	3	18	0	0	A_64_P118698	ENSRNOT00000050943	10320.5	206.127	2.763489e+001	4.105420e+000	88	27	8.757412e+000	0	0	0	0	0	0	26.7428	1	1	47.8731	28.413
DATA	189	3	19	0	0	A_42_P705302	NM_001107361	10345.8	206	6.960424e+003	6.960490e+002	6547	26	7.995380e+000	0	0	0	0	0	0	6747.22	1	1	46.8651	28.2692
DATA	190	3	20	0	0	A_64_P097547	NM_001100528	10371.7	205.829	5.416721e+001	6.204803e+000	110	28	7.909749e+000	0	0	0	0	0	0	52.5868	1	1	47.2035	28.8793
DATA	191	3	21	0	0	A_42_P815485	NM_001013908	10396.5	206.056	8.544943e+003	8.544996e+002	8229	26	6.021769e+000	0	0	0	0	0	0	8306.06	1	1	48.5334	26.2407
DATA	192	3	22	0	0	A_42_P526728	ENSRNOT00000060758	10422.1	206.211	2.220457e+003	2.220663e+002	2191	27.5	8.528942e+000	0	0	0	0	0	0	2160.65	1	1	47.2035	29.1429
DATA	193	3	23	0	0	A_42_P692317	NM_001107565	10447.4	206.232	7.895681e+002	7.901443e+001	805	27	7.736416e+000	0	0	0	0	0	0	768.909	1	1	46.8651	27.9298
DATA	194	3	24	0	0	A_44_P383949	NM_175593	10472.7	206.368	2.917676e+001	4.195771e+000	89.5	27	7.541152e+000	0	0	0	0	0	0	28.4297	1	1	46.1809	27.22
DATA	195	3	25	0	0	A_42_P589570	NM_001014105	10498.1	206.095	2.500267e+002	2.518372e+001	300	29	5.337586e+000	0	0	0	0	0	0	243.698	1	1	47.8731	28.4808
DATA	196	3	26	0	0	A_64_P012384	NM_001039338	10523.6	206.404	1.219448e+002	1.256140e+001	178.5	29	7.023800e+000	0	0	0	0	0	0	118.876	1	1	65	28.8929
DATA	197	3	27	0	0	A_64_P088612	NM_053871	10549	206.055	4.389966e+003	4.390069e+002	4195	27	8.085149e+000	0	0	0	0	0	0	4278.84	1	1	46.8651	28.5862
DATA	198	3	28	0	0	A_42_P668072	NM_013130	10574.5	206.068	2.367445e+002	2.386570e+001	293	31	7.688594e+000	0	0	0	0	0	0	230.676	1	1	48.5334	31.1818
DATA	199	3	29	0	0	A_44_P624451	NM_001134605	10600	206.455	9.010083e+001	9.501728e+000	147	32	7.597125e+000	0	0	0	0	0	0	87.7478	1	1	55.8519	33.1667
DATA	200	3	30	0	0	A_64_P118502	A_64_P118502	10625.5	206.352	2.622156e+002	2.639480e+001	310	36	8.595133e+000	0	0	0	0	0	0	255.171	1	1	57.5363	36.0769
DATA	201	3	31	0	0	A_43_P15761	NM_031608	10650.6	206.427	1.217824e+002	1.254759e+001	178	39	9.959544e+000	0	0	0	0	0	0	118.399	1	1	65	38.4259
DATA	202	3	32	0	0	A_42_P667696	NM_001191800	10676.1	206.395	1.344291e+003	1.344631e+002	1353	31.5	1.114318e+001	0	0	0	0	0	0	1305.41	1	1	49.1849	33.4074
DATA	203	3	33	0	0	A_44_P899121	NM_001079941	10701.5	206.176	3.879144e+003	3.879262e+002	3783	28	5.818747e+000	0	0	0	0	0	0	3761.65	1	1	48.8603	28.6591
DATA	204	3	34	0	0	A_42_P642757	NM_031235	10726.6	206.556	3.637231e+003	3.637358e+002	3541	31	7.320014e+000	0	0	0	0	0	0	3521.78	1	1	48.2044	28.8696
DATA	205	3	35	0	0	A_64_P066694	NM_001033898	10752.7	206.3	2.285825e+002	2.305951e+001	279.5	25	5.951714e+000	0	0	0	0	0	0	220.92	1	1	43.7019	26.0545
DATA	206	3	36	0	0	A_42_P699201	TC594545	10777.6	206.427	2.587344e+002	2.605209e+001	297.5	29	5.879219e+000	0	0	0	0	0	0	249.586	1	1	57.5363	29
DATA	207	3	37	0	0	A_42_P591944	NM_172093	10802.9	206.453	1.485497e+002	1.516530e+001	204.5	30	9.232326e+000	0	0	0	0	0	0	142.992	1	1	48.8603	31.5
DATA	208	3	38	0	0	A_44_P115293	NM_001108294	10828.3	206.467	2.070701e+002	2.093179e+001	255	25.5	5.441497e+000	0	0	0	0	0	0	198.859	1	1	49.1849	25.6833
DATA	209	3	39	1028	1	(+)E1A_r60_a107	E1A_r60_a107	10854	206.455	8.752783e+001	9.274612e+000	144	24	5.515665e+000	0	0	0	1	0	0	83.8442	1	1	55.8519	24.7759
DATA	210	3	40	0	0	A_44_P194531	NM_001007742	10879.1	206.761	2.294527e+002	2.315041e+001	275.5	27	7.527079e+000	0	0	0	0	0	0	219.223	1	1	46.8651	26.7119
DATA	211	3	41	0	0	A_43_P20016	NM_001107377	10904.9	206.603	1.014997e+002	1.060820e+001	156	25	6.587749e+000	0	0	0	0	0	0	96.6908	1	1	49.5074	26.0392
DATA	212	3	42	0	0	A_64_P105550	A_64_P105550	10930.3	205.93	3.302568e+002	3.317027e+001	349.5	28.5	7.949752e+000	0	0	0	0	0	0	313.631	1	1	42.5954	28.7
DATA	213	3	43	0	0	A_42_P791872	NM_001135174	10955.3	206.395	8.642191e+003	8.642247e+002	7811	28	7.500266e+000	0	0	0	0	0	0	8181.89	1	1	49.5074	28.4717
DATA	214	3	44	0	0	A_42_P499273	NM_001012148	10980.8	206.342	2.530893e+003	2.531085e+002	2390.5	28	7.828856e+000	0	0	0	0	0	0	2388.04	1	1	48.2044	29.7241
DATA	215	3	45	0	0	A_64_P021960	NM_001109493	11006.2	206.39	4.433726e+002	4.444723e+001	485	32	1.126749e+001	0	0	0	0	0	0	416.88	1	1	49.8279	34.8462
DATA	216	3	46	0	0	A_64_P083725	A_64_P083725	11031.7	206.5	1.104165e+005	1.104165e+004	104094	37	1.550393e+001	0	0	0	0	0	0	103441	1	1	57.5363	41.2708
DATA	217	3	47	0	0	A_42_P524536	NM_012698	11056.9	206.72	2.766018e+002	2.783874e+001	315	31	6.816233e+000	0	0	0	0	0	0	258.156	1	1	48.8603	30.6071
DATA	218	3	48	0	0	A_64_P151675	NM_175755	11082.9	206.667	1.038860e+002	1.085878e+001	155	29	7.585069e+000	0	0	0	0	0	0	96.5665	1	1	48.8603	28.3621
DATA	219	3	49	0	0	A_64_P146914	A_64_P146914	11107.9	206.376	1.849351e+003	1.849624e+002	1704	34	8.904768e+000	0	0	0	0	0	0	1712.07	1	1	52.0157	33.5098
DATA	220	3	50	0	0	A_64_P115065	NM_001109631	11133.4	206.573	1.012348e+001	3.343968e+000	72	28	7.013538e+000	0	0	0	0	0	0	9.33251	1	0	65	28.2917
DATA	221	3	51	0	0	A_42_P468771	NM_001107362	11158.6	206.64	4.612553e+003	4.612664e+002	4077.5	29	7.377429e+000	0	0	0	0	0	0	4233.87	1	1	48.8603	28.4468
DATA	222	3	52	0	0	A_44_P226461	NM_053798	11183.7	206.443	1.247147e+003	1.247561e+002	1165	28	6.663763e+000	0	0	0	0	0	0	1139.67	1	1	47.5395	28.4231
DATA	223	3	53	0	0	A_64_P009440	NM_001109313	11209.4	206.878	9.625708e+000	3.370227e+000	73	27	6.848637e+000	0	0	0	0	0	0	8.75606	1	0	48.8603	27.2131
DATA	224	3	54	0	0	A_44_P282433	NM_033230	11234.9	206.5	7.333701e+002	7.340879e+001	717	27	5.909243e+000	0	0	0	0	0	0	663.912	1	1	56.9804	28.0893
DATA	225	3	55	0	0	A_42_P461003	NM_001044283	11260.1	206.91	1.107995e+004	1.108000e+003	9935	30	8.534634e+000	0	0	0	1	0	0	9983.31	1	1	46.5243	30.3958
DATA	226	3	56	0	1	ETG10_236652	ETG10_236652	11285.6	206.573	1.160064e+002	1.205465e+001	165	27	6.550455e+000	0	0	0	1	0	0	104.003	1	1	57.5363	27.1852
DATA	227	3	57	0	0	A_42_P529780	NM_138855	11310.7	206.556	5.804649e+002	5.813985e+001	577	30.5	9.975266e+000	0	0	0	0	0	0	517.812	1	1	48.5334	32.05
DATA	228	3	58	0	0	A_42_P492976	NM_001126099	11336.2	206.535	2.362066e+002	2.385152e+001	266	27	8.229518e+000	0	0	0	0	0	0	209.63	1	1	47.5395	27.9245
DATA	229	3	59	0	0	A_42_P533865	NM_001127650	11362.1	206.359	5.204068e+001	6.177381e+000	105	29	1.300566e+001	0	0	0	1	0	0	45.9383	1	1	45.1352	32.1754
DATA	230	3	60	0	0	A_64_P026399	NM_001007626	11387.4	206.573	9.027729e+002	9.033927e+001	828	27	8.737187e+000	0	0	0	0	0	0	792.747	1	1	57.5363	27.5102
DATA	231	3	61	0	0	A_64_P152543	XM_221353	11412.5	206.87	1.446546e+004	1.446550e+003	12542.5	29	7.273172e+000	0	0	0	0	0	0	12635.9	1	1	47.2035	28.8913
DATA	232	3	62	0	0	A_44_P203195	NM_053585	11437.6	207.027	6.983125e+002	6.991307e+001	649	28	9.536952e+000	0	0	0	0	0	0	606.728	1	1	49.1849	29.9375
DATA	233	3	63	0	0	A_42_P490612	NM_001108262	11463.1	206.846	6.663079e+003	6.663166e+002	5513.5	26	6.426176e+000	0	0	0	0	0	0	5757.01	1	1	49.5074	26.9123
DATA	234	3	64	0	0	A_44_P457548	NM_001103351	11488.8	207.459	8.597116e+001	9.252138e+000	135.5	29.5	1.138853e+001	0	0	0	0	0	0	73.8707	1	1	47.8731	31.6522
DATA	235	3	65	0	0	A_42_P755665	NM_001013154	11514	206.882	1.828626e+003	1.828950e+002	1595.5	29	6.728628e+000	0	0	0	0	0	0	1562.27	1	1	46.8651	30.1053
DATA	236	3	66	0	0	A_42_P781999	NM_001106378	11539.5	207	1.873248e+004	1.873251e+003	15062.5	29	7.928250e+000	0	0	0	0	0	0	15913.1	1	1	48.5334	30
DATA	237	3	67	0	0	A_44_P100289	ENSRNOT00000049514	11565	207	1.025826e+002	1.083201e+001	145	28	9.009655e+000	0	0	0	0	0	0	86.6422	1	1	54.9904	29.64
DATA	238	3	68	0	0	A_42_P629599	ENSRNOT00000023101	11590	206.912	3.996256e+002	4.011541e+001	402	27	5.898810e+000	0	0	0	0	0	0	335.603	1	1	46.8651	28.0182
DATA	239	3	69	0	0	A_44_P192083	NM_001047088	11615.5	207	7.187596e+001	8.002777e+000	122.5	29.5	8.956607e+000	0	0	0	0	0	0	60.0108	1	1	54.1152	29.94
DATA	240	3	70	0	0	A_42_P498066	NM_031136	11641.5	207	8.087055e+004	8.087056e+003	67526	28	7.818075e+000	0	0	0	1	0	0	67117.7	1	1	54.1152	29.5185
DATA	241	3	71	0	0	A_42_P519910	NM_001106292	11666.3	206.986	2.045075e+004	2.045078e+003	17020	28	8.602371e+000	0	0	0	1	0	0	16875.8	1	1	47.2035	28.8627
DATA	242	3	72	0	0	A_42_P657538	NM_001008362	11691.8	207	2.416518e+003	2.416783e+002	2039	26.5	6.795910e+000	0	0	0	0	0	0	1982.35	1	1	49.1849	27.6667
DATA	243	3	73	0	0	A_64_P030630	NM_001109610	11717.3	206.986	3.933504e+003	3.933669e+002	3327	28.5	6.468637e+000	0	0	0	0	0	0	3207.73	1	1	47.2035	27.56
DATA	244	3	74	0	0	A_44_P126366	NM_001017456	11742.5	206.93	6.772576e+001	7.681217e+000	117	27	9.387267e+000	0	0	0	0	0	0	54.9066	1	1	47.8731	27.8627
DATA	245	3	75	0	0	A_43_P15627	ENSRNOT00000067029	11768.2	207.075	4.894903e+001	6.103277e+000	100.5	26	6.981994e+000	0	0	0	0	0	0	39.4494	1	1	45.835	26.8235
DATA	246	3	76	0	0	A_42_P754784	CB328432	11793.7	207	5.990398e+003	5.990511e+002	4692	28	7.279381e+000	0	0	0	0	0	0	4799.32	1	1	49.1849	29.52
DATA	247	3	77	66	1	DarkCorner	DarkCorner	11819	207.137	3.702974e+000	3.688562e+000	57.5	28	7.047565e+000	0	0	0	0	0	0	-4.71613	0	0	46.8651	28.6923
DATA	248	3	78	66	1	DarkCorner	DarkCorner	11843.8	206.988	3.724387e+000	3.709891e+000	56.5	30	6.912329e+000	0	0	0	0	0	0	-6.65691	0	0	49.8279	29.9692
DATA	249	3	79	66	1	DarkCorner	DarkCorner	11869.7	207.348	3.746083e+000	3.731503e+000	56	31	7.546479e+000	0	0	0	0	0	0	-6.13714	0	0	46.8651	30.8214
DATA	250	3	80	66	1	DarkCorner	DarkCorner	11895.4	206.817	3.768716e+000	3.754048e+000	56.5	29	7.472725e+000	0	0	0	0	0	0	-3.2723	0	0	42.9674	30.2742
DATA	251	3	81	66	1	DarkCorner	DarkCorner	11920.8	206.676	3.790569e+000	3.775816e+000	58	31	6.618920e+000	0	0	0	0	0	0	-4.84407	0	0	46.8651	30.6923
DATA	252	3	82	66	1	DarkCorner	DarkCorner	11945.9	207.065	3.811497e+000	3.796663e+000	59	30	6.383424e+000	0	0	0	0	0	0	-2.78122	0	0	65	29.8983
DATA	253	3	83	66	1	DarkCorner	DarkCorner	11971.2	207.28	3.832653e+000	3.817736e+000	58	29	6.219809e+000	0	0	0	0	0	0	-4.26134	0	0	48.2044	29.3448
DATA	254	3	84	66	1	DarkCorner	DarkCorner	11996.8	206.568	3.855157e+000	3.840153e+000	60	33	8.829623e+000	0	0	0	0	0	0	-2.8763	0	0	48.2044	33.5972
DATA	255	3	85	66	1	DarkCorner	DarkCorner	12022.1	207.386	3.875292e+000	3.876107e+000	64	32	7.626819e+000	0	0	0	1	0	0	2.66919	0	0	65	33.6333
DATA	256	4	1	66	1	DarkCorner	DarkCorner	9901.77	213.151	3.543004e+000	3.254733e+000	62	29	9.720174e+000	0	0	0	0	0	0	3.21738	1	0	47.8731	30.3077
DATA	257	4	2	66	1	DarkCorner	DarkCorner	9926.95	213.145	3.228994e+000	3.216427e+000	56.5	31.5	9.278490e+000	0	0	0	0	0	0	-1.85533	0	0	48.2044	30.1591
DATA	258	4	3	66	1	DarkCorner	DarkCorner	9952.63	213.164	3.210546e+000	3.198050e+000	54.5	27	1.065539e+001	0	0	0	0	0	0	-4.35939	0	0	48.5334	30.0882
DATA	259	4	4	66	1	DarkCorner	DarkCorner	9977.64	213.243	3.193488e+000	3.181059e+000	53	28	4.637522e+000	0	0	0	0	0	0	-4.52998	0	0	48.5334	27.8929
DATA	260	4	5	66	1	DarkCorner	DarkCorner	10003.4	213.427	3.176796e+000	3.164432e+000	56	28	5.235304e+000	0	0	0	0	0	0	-3.67867	0	0	57.5363	27.3784
DATA	261	4	6	66	1	DarkCorner	DarkCorner	10028.8	213.419	3.161367e+000	3.149063e+000	57.5	28	7.958025e+000	0	0	0	0	0	0	-1.98242	0	0	48.5334	29.3889
DATA	262	4	7	66	1	DarkCorner	DarkCorner	10054.1	213.5	3.146877e+000	3.134629e+000	52	27	7.105526e+000	0	0	0	0	0	0	-6.43474	0	0	56.9804	27.1667
DATA	263	4	8	66	1	DarkCorner	DarkCorner	10080.2	213.6	3.132848e+000	3.120655e+000	55	26	6.106345e+000	0	0	0	0	0	0	-4.96481	0	0	47.2035	27.2308
DATA	264	4	9	66	1	DarkCorner	DarkCorner	10105	213.146	3.120583e+000	3.108438e+000	54	27	6.785811e+000	0	0	0	0	0	0	-6.36954	0	0	51.0895	27.2059
DATA	265	4	10	0	0	A_44_P807031	NM_001108921	10130.2	213.392	6.905122e+003	6.905192e+002	6430.5	29	6.627702e+000	0	0	0	0	0	0	6551.67	1	1	49.1849	29.0667
DATA	266	4	11	0	0	A_64_P025813	NM_001009379	10155.6	213.427	3.097536e+000	3.085480e+000	60	28.5	7.106740e+000	0	0	0	0	0	0	-0.923315	0	0	57.5363	28.3333
DATA	267	4	12	0	0	A_64_P130551	XM_001081846	10181.1	213.5	1.690586e+001	3.509240e+000	76.5	29	7.494063e+000	0	0	0	0	0	0	16.152	1	1	56.9804	29.1951
DATA	268	4	13	0	0	A_42_P715449	NM_001033709	10206.2	213.628	1.981789e+003	1.982026e+002	1867	29	8.930704e+000	0	0	0	1	0	0	1899.19	1	1	50.1463	29.0333
DATA	269	4	14	0	0	A_42_P727584	NM_031622	10231.4	213.534	3.405778e+003	3.405915e+002	3137.5	25	6.579894e+000	0	0	0	0	0	0	3272.96	1	1	49.1849	24.9118
DATA	270	4	15	0	0	A_42_P600642	NM_001008386	10257.4	213.566	2.228804e+002	2.249565e+001	273	26.5	6.531005e+000	0	0	0	1	0	0	214.752	1	1	49.8279	26.3667
DATA	271	4	16	0	0	A_42_P669103	NM_001108329	10282.2	213.6	9.189962e+002	9.194997e+001	905.5	27	7.414561e+000	0	0	0	0	0	0	887.502	1	1	49.1849	28.1538
DATA	272	4	17	0	0	A_44_P715330	NM_001024966	10307.9	213.507	8.328674e+002	8.334205e+001	821.5	28.5	8.541217e+000	0	0	0	0	0	0	806.012	1	1	48.5334	29.2857
DATA	273	4	18	0	0	A_64_P083185	NM_001107199	10333.5	213.5	6.059032e+002	6.066605e+001	647	26.5	1.011232e+001	0	0	0	0	0	0	587.452	1	1	57.5363	28.7917
DATA	274	4	19	0	0	A_64_P037313	ENSRNOT00000030164	10358.7	213.5	8.989956e+000	3.156254e+000	67	30	7.986288e+000	0	0	0	0	0	0	8.73003	1	0	57.5363	31.069
DATA	275	4	20	0	0	A_44_P321009	NM_012540	10384.3	213.5	3.374875e+000	3.040141e+000	65	29	8.163960e+000	0	0	0	0	0	0	3.28181	1	0	57.5363	30.6897
DATA	276	4	21	0	0	A_42_P700753	FQ212883	10409.3	213.627	2.109273e+003	2.109489e+002	2036	28	8.779434e+000	0	0	0	0	0	0	2053.42	1	1	49.1849	28.9615
DATA	277	4	22	0	0	A_44_P775974	NM_001024363	10435	213.545	3.027020e+000	3.020990e+000	62	29.5	8.240964e+000	0	0	0	0	0	0	1.81546	0	0	55.8519	30.9722
DATA	278	4	23	0	0	A_44_P503868	A_44_P503868	10460.4	213.761	2.330681e+003	2.330876e+002	2344	28.5	8.919832e+000	0	0	0	0	0	0	2272.59	1	1	46.5243	28.7917
DATA	279	4	24	0	0	A_64_P122541	A_64_P122541	10485.6	213.573	2.619738e+002	2.636995e+001	321	27.5	6.080992e+000	0	0	0	0	0	0	255.55	1	1	57.5363	27.5385
DATA	280	4	25	0	0	A_64_P080967	NM_001033890	10511.2	213.521	1.129002e+004	1.129006e+003	10755	29	6.247051e+000	0	0	0	0	0	0	11015.5	1	1	48.2044	28.1111
DATA	281	4	26	0	0	A_44_P1056309	NM_001105912	10536.8	213.493	2.906212e+001	4.184953e+000	90	28.5	9.118397e+000	0	0	0	0	0	0	28.3553	1	1	47.2035	30.375
DATA	282	4	27	0	0	A_44_P199514	NM_001005564	10562	213.545	2.523121e+003	2.523301e+002	2463	34	8.555700e+000	0	0	0	0	0	0	2461.23	1	1	55.8519	33.6667
DATA	283	4	28	0	0	A_64_P097952	NM_001134962	10587.4	213.573	3.220268e+001	4.410174e+000	93	35	9.383783e+000	0	0	0	0	0	0	31.3992	1	1	57.5363	35.8462
DATA	284	4	29	0	0	A_42_P813939	NM_001108741	10612.5	214	2.396482e+003	2.396671e+002	2341	40	8.126500e+000	0	0	0	0	0	0	2335.32	1	1	48.5334	37.96
DATA	285	4	30	0	0	A_64_P006423	NM_012584	10638.2	213.786	2.065078e+001	3.656628e+000	80	37.5	7.395509e+000	0	0	0	0	0	0	20.1058	1	1	51.4001	37.375
DATA	286	4	31	0	0	A_42_P670614	NM_001107097	10663.4	214.232	6.797021e+003	6.797088e+002	6514	36	1.006262e+001	0	0	0	0	0	0	6611.02	1	1	46.8651	36.5556
DATA	287	4	32	0	0	A_64_P084088	NM_001011954	10688.5	213.986	2.300657e+002	2.320453e+001	268	30	4.714980e+000	0	0	0	0	0	0	223.484	1	1	48.5334	30.9
DATA	288	4	33	0	0	A_64_P025643	XM_001073566	10714.6	213.583	3.832307e+002	3.844261e+001	434	30.5	8.848519e+000	0	0	0	0	0	0	371.69	1	1	47.8731	29
DATA	289	4	34	0	0	A_42_P719607	NM_153721	10739.9	212.458	9.246161e+001	9.731447e+000	144	29	7.356342e+000	0	0	0	1	0	0	89.5157	1	1	42.9674	30.5172
DATA	290	4	35	0	0	A_42_P843603	NM_052800	10765	213.771	4.867425e+002	4.876908e+001	528	29	5.862174e+000	0	0	0	0	0	0	470.453	1	1	46.8651	29.0714
DATA	291	4	36	0	0	A_44_P234129	NM_001135802	10790.4	214.129	1.353560e+002	1.387406e+001	189	32	1.027210e+001	0	0	0	0	0	0	130.566	1	1	47.2035	32.3824
DATA	292	4	37	0	0	A_42_P701161	NM_001033666	10815.6	214.232	5.040032e+003	5.040125e+002	4815	27.5	4.849266e+000	0	0	0	0	0	0	4851.03	1	1	46.8651	27.3462
DATA	293	4	38	0	0	A_44_P1017335	NM_001108607	10841.1	213.895	6.909079e+003	6.909147e+002	6612	27	4.549457e+000	0	0	0	1	0	0	6633.6	1	1	47.8731	26.9512
DATA	294	4	39	0	0	A_44_P900209	CV121387	10866.4	213.974	9.940403e+001	1.040305e+001	147	25	6.204769e+000	0	0	0	0	0	0	95.1969	1	1	49.1849	25.8286
DATA	295	4	40	0	0	A_64_P037517	ENSRNOT00000014921	10892	213.932	3.065775e+001	4.343215e+000	90	30	7.680970e+000	0	0	0	0	0	0	29.2784	1	1	46.8651	32.0513
DATA	296	4	41	0	0	A_64_P128528	NM_001106013	10917	214	2.562206e+003	2.562391e+002	2497	29	8.849353e+000	0	0	0	0	0	0	2439.92	1	1	46.8651	29.8529
DATA	297	4	42	0	0	A_64_P378865	NM_001000706	10942.6	213.931	1.319813e+002	1.355616e+001	164.5	30.5	6.521840e+000	0	0	0	0	0	0	125.29	1	1	53.8203	30.6429
DATA	298	4	43	0	0	A_42_P553960	NM_001107831	10968.1	213.808	9.336068e+003	9.336119e+002	8474.5	35	8.479929e+000	0	0	0	0	0	0	8833.64	1	1	47.5395	35.4333
DATA	299	4	44	0	0	A_42_P717654	XM_001063683	10993.3	213.905	5.279297e+003	5.279389e+002	4736	29	6.746349e+000	0	0	0	0	0	0	4978.42	1	1	48.8603	30.5714
DATA	300	4	45	0	0	A_44_P295118	NM_001107228	11019	214	2.875036e+002	2.891990e+001	328.5	30	6.984313e+000	0	0	0	0	0	0	270.145	1	1	65	29.6296
DATA	301	4	46	0	0	A_64_P049057	ENSRNOT00000014519	11044.3	214	1.373637e+003	1.373995e+002	1288	31	6.801847e+000	0	0	0	0	0	0	1285.94	1	1	49.1849	29.8438
DATA	302	4	47	0	0	A_42_P810287	NM_001004107	11069.3	214.1	2.176195e+003	2.176423e+002	2006.5	31	6.313744e+000	0	0	0	0	0	0	2029.56	1	1	47.2035	31.5676
DATA	303	4	48	0	0	A_42_P702729	NM_001107557	11095.1	214.095	2.193157e+003	2.193385e+002	2007	31.5	6.954444e+000	0	0	0	0	0	0	2037.08	1	1	47.5395	31.25
DATA	304	4	49	0	0	A_42_P811084	NM_173147	11120.5	214	2.327171e+003	2.327388e+002	2177.5	30	9.766346e+000	0	0	0	0	0	0	2152.6	1	1	48.5334	32.1714
DATA	305	4	50	0	0	A_64_P151473	A_64_P151473	11146	214	4.454692e+004	4.454693e+003	40844	27	8.140954e+000	0	0	0	0	0	0	41029.2	1	1	54.9904	27.1429
DATA	306	4	51	0	0	A_44_P134634	ENSRNOT00000000260	11171	213.954	1.171107e+002	1.214140e+001	168.5	30	7.036194e+000	0	0	0	0	0	0	107.396	1	1	46.8651	29.3529
DATA	307	4	52	0	0	A_44_P178479	NM_001135039	11196.5	214	8.794339e+002	8.800226e+001	851	28	7.588470e+000	0	0	0	0	0	0	802.844	1	1	48.5334	29.0571
DATA	308	4	53	0	0	A_64_P317400	ENSRNOT00000068382	11221.9	214.027	1.749823e+001	3.676379e+000	75.5	28	6.253204e+000	0	0	0	0	0	0	15.9006	1	1	46.8651	27.7179
DATA	309	4	54	0	0	A_42_P781735	NM_053319	11247.5	214	9.101434e+004	9.101435e+003	81980.5	32.5	8.479477e+000	0	0	0	0	0	0	82309.2	1	1	54.1152	32.3077
DATA	310	4	55	0	0	A_64_P144869	NM_017131	11273.3	214.25	2.465788e+002	2.487306e+001	282	30	8.065194e+000	0	0	0	0	0	0	221.909	1	1	48.5334	30.8788
DATA	311	4	56	0	0	A_44_P445484	ENSRNOT00000049980	11298.2	214.143	9.834921e+002	9.840391e+001	931	27	6.431316e+000	0	0	0	0	0	0	880.782	1	1	48.8603	27.1481
DATA	312	4	57	0	0	A_42_P487832	NM_001108389	11323.5	214	1.861933e+003	1.862225e+002	1620.5	30	7.524944e+000	0	0	0	0	0	0	1659.07	1	1	48.5334	30.2647
DATA	313	4	58	0	0	A_42_P482829	NM_001108138	11348.6	213.735	9.163065e+002	9.169057e+001	841	26	6.217106e+000	0	0	0	0	0	0	812.284	1	1	46.5243	26.8824
DATA	314	4	59	0	0	A_64_P101440	XM_001065775	11374.5	214.352	1.118255e+002	1.166829e+001	156	29	7.555978e+000	0	0	0	0	0	0	98.6158	1	1	57.5363	29.697
DATA	315	4	60	0	0	A_64_P072268	NM_001002277	11399.9	214.386	7.496333e+002	7.503811e+001	712	32	6.751958e+000	0	0	0	0	0	0	657.581	1	1	57.259	30.0435
DATA	316	4	61	0	0	A_42_P589190	NM_023104	11425.3	213.894	1.384075e+003	1.384484e+002	1208	30	8.501568e+000	0	0	0	0	0	0	1207.46	1	1	45.835	30.12
DATA	317	4	62	0	0	A_64_P027328	A_64_P027328	11450.6	214.427	3.445997e+002	3.462590e+001	362	29	6.769837e+000	0	0	0	0	0	0	299.033	1	1	65	30.1429
DATA	318	4	63	0	0	A_42_P788541	NM_001106794	11475.9	214.278	4.771278e+003	4.771399e+002	4003	32	1.560980e+001	0	0	0	1	0	0	4117.53	1	1	47.8731	35.9706
DATA	319	4	64	0	0	A_42_P457003	NM_012802	11501.1	214.232	3.514406e+003	3.514572e+002	2995	28	6.995179e+000	0	0	0	0	0	0	3016.08	1	1	46.5243	30.2564
DATA	320	4	65	0	0	A_64_P095695	A_64_P095695	11527	214.455	1.388353e+002	1.430409e+001	179.5	30	6.841229e+000	0	0	0	0	0	0	118.471	1	1	65	30.3125
DATA	321	4	66	0	0	A_42_P463880	NM_001013927	11552.3	214.329	7.996610e+001	8.714154e+000	130	30	9.176513e+000	0	0	0	0	0	0	67.8486	1	1	48.2044	31.8158
DATA	322	4	67	0	0	A_43_P20354	NM_001134574	11577.6	214.427	1.408103e+002	1.450528e+001	183	29.5	7.340094e+000	0	0	0	0	0	0	118.797	1	1	57.5363	29.1071
DATA	323	4	68	0	0	A_64_P055958	ENSRNOT00000056114	11603.1	214.5	7.144958e+001	7.957320e+000	128	31.5	6.732060e+000	0	0	0	0	0	0	59.9323	1	1	56.9804	30.7778
DATA	324	4	69	0	0	A_64_P159044	ENSRNOT00000040690	11628.5	214.5	8.559353e+002	8.566600e+001	792	33	7.887516e+000	0	0	0	0	0	0	713.814	1	1	57.5363	31.2903
DATA	325	4	70	0	0	A_44_P473234	ENSRNOT00000024858	11653.9	214.5	5.827350e+002	5.838114e+001	541	34	5.809638e+000	0	0	0	0	0	0	483.156	1	1	56.9804	32.5758
DATA	326	4	71	0	0	A_42_P797965	NM_001108497	11679.1	214.5	5.964860e+002	5.975499e+001	553	28	8.416205e+000	0	0	0	1	0	0	491.696	1	1	50.4627	30.2414
DATA	327	4	72	0	0	A_42_P592157	NM_001002828	11704.6	214.427	2.814466e+002	2.837210e+001	294	28	6.093996e+000	0	0	0	1	0	0	230.641	1	1	57.5363	26.9667
DATA	328	4	73	0	0	A_64_P016419	NM_001000622	11730.1	214.5	4.385576e+001	5.677936e+000	100	25.5	7.478010e+000	0	0	0	0	0	0	35.7287	1	1	56.9804	26.0714
DATA	329	4	74	0	0	A_44_P306863	XM_344447	11755	213.754	1.460752e+003	1.461202e+002	1231	27	8.471802e+000	0	0	0	0	0	0	1183.01	1	1	45.4864	28.3333
DATA	330	4	75	0	0	A_42_P471835	TC610276	11780.6	214.278	3.047074e+003	3.047292e+002	2457	30	7.251974e+000	0	0	0	0	0	0	2453.52	1	1	48.5334	30.6552
DATA	331	4	76	0	1	ETG02_36680	ETG02_36680	11806.3	214.5	3.684565e+000	3.674517e+000	65	29	5.402068e+000	0	0	0	0	0	0	1.42131	0	0	57.5363	29.4815
DATA	332	4	77	66	1	DarkCorner	DarkCorner	11831.4	214.265	3.706059e+000	3.691634e+000	55	26.5	6.857713e+000	0	0	0	0	0	0	-7.06121	0	0	51.4001	27.4375
DATA	333	4	78	66	1	DarkCorner	DarkCorner	11857.5	214.768	3.727675e+000	3.713166e+000	56	30.5	6.633201e+000	0	0	0	0	0	0	-6.05165	0	0	51.0895	30.275
DATA	334	4	79	66	1	DarkCorner	DarkCorner	11882.4	214.354	3.749163e+000	3.734571e+000	55	33	7.993840e+000	0	0	0	0	0	0	-5.01514	0	0	45.1352	34.4828
DATA	335	4	80	66	1	DarkCorner	DarkCorner	11907.9	214.559	3.770584e+000	3.755909e+000	56	31.5	5.946287e+000	0	0	0	0	0	0	-5.43482	0	0	46.8651	32.975
DATA	336	4	81	66	1	DarkCorner	DarkCorner	11933.3	214.5	3.792133e+000	3.777374e+000	58	31	6.731813e+000	0	0	0	0	0	0	-4.58418	0	0	57.5363	32.375
DATA	337	4	82	66	1	DarkCorner	DarkCorner	11959.4	214.165	3.814500e+000	3.799654e+000	59	32	6.620713e+000	0	0	0	0	0	0	-3.15439	0	0	50.1463	32.0769
DATA	338	4	83	66	1	DarkCorner	DarkCorner	11983.9	214.679	3.834372e+000	3.819449e+000	57.5	30	7.014618e+000	0	0	0	0	0	0	-4.39454	0	0	49.8279	30.5581
DATA	339	4	84	66	1	DarkCorner	DarkCorner	12009.3	214.219	3.856042e+000	3.841034e+000	58	31	8.081177e+000	0	0	0	0	0	0	-4.06082	0	0	48.5334	31.6552
DATA	340	4	85	66	1	DarkCorner	DarkCorner	12034.6	214.573	4.135773e+000	3.883495e+000	66.5	29	7.502172e+000	0	0	0	1	0	0	3.14679	1	0	57.5363	30.4171
DATA	341	5	1	66	1	DarkCorner	DarkCorner	9888.56	220.234	7.425389e+000	3.325391e+000	67	25	6.811224e+000	0	0	0	1	0	0	6.73039	1	0	45.4864	26.0785
DATA	342	5	2	66	1	DarkCorner	DarkCorner	9914.15	220.164	3.234415e+000	3.232431e+000	63	29	9.631936e+000	0	0	0	0	0	0	2.38576	0	0	47.5395	30.75
DATA	343	5	3	66	1	DarkCorner	DarkCorner	9940.17	220.847	3.214988e+000	3.202475e+000	56	31	1.050759e+001	0	0	0	0	0	0	-2.12979	0	0	44.4243	29.9286
DATA	344	5	4	66	1	DarkCorner	DarkCorner	9965.38	220.719	3.197582e+000	3.185137e+000	57	26	8.634096e+000	0	0	0	0	0	0	-1.3923	0	0	44.7812	28.5
DATA	345	5	5	66	1	DarkCorner	DarkCorner	9990.5	220.5	3.181193e+000	3.168811e+000	56.5	28	4.603412e+000	0	0	0	0	0	0	-3.78159	0	0	57.5363	27.5161
DATA	346	5	6	66	1	DarkCorner	DarkCorner	10016	220.545	3.165333e+000	3.153013e+000	57	28	5.386638e+000	0	0	0	0	0	0	-1.77932	0	0	55.8519	28.1111
DATA	347	5	7	66	1	DarkCorner	DarkCorner	10041.5	220.5	3.150427e+000	3.138166e+000	58	26	6.732722e+000	0	0	0	0	0	0	-0.816688	0	0	57.5363	27.7273
DATA	348	5	8	66	1	DarkCorner	DarkCorner	10066.7	220.554	3.136512e+000	3.124304e+000	55	25	6.324945e+000	0	0	0	0	0	0	-5.32003	0	0	51.4001	27.1724
DATA	349	5	9	66	1	DarkCorner	DarkCorner	10092	220.5	3.123466e+000	3.111309e+000	53.5	26	6.269842e+000	0	0	0	0	0	0	-5.50249	0	0	49.1849	27.4286
DATA	350	5	10	0	0	A_43_P17919	XM_001070979	10117.4	220.203	3.274632e+001	4.508701e+000	91	32	6.821619e+000	0	0	0	0	0	0	31.0433	1	1	46.8651	30.0345
DATA	351	5	11	0	0	A_42_P826221	NM_012933	10142.7	220.753	6.468962e+003	6.469036e+002	6144.5	29.5	7.273183e+000	0	0	0	0	0	0	6155.51	1	1	48.2044	30.4375
DATA	352	5	12	0	0	A_64_P011524	NM_001194951	10168	220.5	7.587857e+002	7.594094e+001	778	28.5	6.811179e+000	0	0	0	0	0	0	724.465	1	1	48.5334	29.1765
DATA	353	5	13	0	0	A_44_P258417	NM_001009699	10193.8	220.767	9.207454e+001	9.704887e+000	149	30	7.699247e+000	0	0	0	0	0	0	88.1976	1	1	47.8731	30.1818
DATA	354	5	14	0	0	A_64_P164617	A_64_P164617	10219.3	220.5	4.721396e+004	4.721397e+003	44175	28.5	7.275846e+000	0	0	0	0	0	0	45357.3	1	1	57.5363	27.6
DATA	355	5	15	0	0	A_42_P758933	NM_001106476	10244.3	221.29	8.192882e+003	8.192938e+002	7674	28	7.688560e+000	0	0	0	1	0	0	7892.32	1	1	46.8651	26.963
DATA	356	5	16	0	0	A_42_P573312	NM_001134761	10269.7	221.157	5.553100e+002	5.561429e+001	574	27	7.047153e+000	0	0	0	0	0	0	536.23	1	1	47.2035	28.0645
DATA	357	5	17	0	0	A_64_P096257	NM_001160228	10295.6	220.973	8.955569e+002	8.960713e+001	884	26	7.621707e+000	0	0	0	0	0	0	866.694	1	1	48.5334	27.4103
DATA	358	5	18	0	0	A_43_P15847	NM_178847	10320.6	220.573	1.030654e+002	1.074276e+001	157	28	1.258018e+001	0	0	0	0	0	0	99.9299	1	1	57.5363	31
DATA	359	5	19	0	0	A_64_P139962	NM_001000675	10346.2	220.57	4.870000e+000	3.063959e+000	63	33.5	8.342754e+000	0	0	0	0	0	0	4.72998	1	0	58.0869	33.8077
DATA	360	5	20	0	0	A_64_P117474	NM_001000646	10371.4	220.772	3.032310e+000	3.020508e+000	60.5	30.5	9.732061e+000	0	0	0	0	0	0	-0.582022	0	0	50.4627	32.8824
DATA	361	5	21	0	1	ERCC-00075_180	ERCC-00075_180	10396.9	220.614	4.415340e+001	5.347563e+000	104	28	6.417379e+000	0	0	0	0	0	0	43.0004	1	1	57.259	29.3
DATA	362	5	22	0	0	A_42_P740730	NM_001012136	10422.5	220.878	2.354997e+001	3.824683e+000	82	28.5	9.380155e+000	0	0	0	0	0	0	22.959	1	1	48.5334	30.1111
DATA	363	5	23	0	0	A_42_P702258	NM_017227	10448	221.127	2.315455e+001	3.798529e+000	82	28	7.308427e+000	0	0	0	0	0	0	22.5918	1	1	46.8651	29.4815
DATA	364	5	24	0	0	A_42_P668800	NM_001127553	10472.6	221.282	1.326445e+003	1.326787e+002	1292	28	9.015883e+000	0	0	0	0	0	0	1294.92	1	1	47.5395	28.3846
DATA	365	5	25	0	0	A_42_P842513	NM_031077	10498.4	220.75	4.854809e+003	4.854903e+002	4696.5	30	6.897204e+000	0	0	0	0	0	0	4740.69	1	1	46.5243	30.6429
DATA	366	5	26	0	0	A_64_P047697	NM_001161835	10523.7	220.882	3.224528e+002	3.238531e+001	364	28	7.567901e+000	0	0	0	0	0	0	314.912	1	1	48.8603	28.8387
DATA	367	5	27	0	0	A_42_P660036	NM_001134727	10549.2	221	1.979118e+002	2.001856e+001	251	31	8.835406e+000	0	0	0	0	0	0	193.264	1	1	46.8651	32.4242
DATA	368	5	28	0	0	A_64_P095050	A_64_P095050	10574.5	221	5.875949e+004	5.875950e+003	58343	34	8.954611e+000	0	0	0	0	0	0	57361	1	1	54.1152	33.7667
DATA	369	5	29	0	0	A_42_P561835	ENSRNOT00000043937	10599.8	221.013	2.495047e+002	2.513153e+001	292	35	8.455373e+000	0	0	0	0	0	0	243.436	1	1	49.1849	35.92
DATA	370	5	30	0	0	A_64_P098774	ENSRNOT00000002068	10625.7	221.051	2.144551e+001	3.698738e+000	79	37.5	7.902633e+000	0	0	0	0	0	0	20.908	1	1	49.1849	37.5
DATA	371	5	31	0	0	A_64_P163184	NM_001107855	10651.1	221.205	4.790547e+002	4.800034e+001	519.5	37.5	6.697153e+000	0	0	0	0	0	0	466.611	1	1	48.5334	38.5
DATA	372	5	32	0	0	A_42_P549675	NM_080577	10675.8	221.194	4.418646e+003	4.418749e+002	4196	30	6.318321e+000	0	0	0	0	0	0	4299.01	1	1	47.5395	30.2759
DATA	373	5	33	0	0	A_64_P287740	NM_001127601	10701.6	221.234	8.695052e+001	9.205877e+000	142.5	28.5	4.595115e+000	0	0	0	0	0	0	84.4804	1	1	45.4864	28.6786
DATA	374	5	34	0	0	A_64_P059545	NM_053477	10727.2	221.075	5.013612e+003	5.013703e+002	4842	32.5	7.576492e+000	0	0	0	0	0	0	4863.43	1	1	45.835	29.875
DATA	375	5	35	0	0	A_44_P465856	NM_199398	10752.5	221	5.286381e+001	6.095193e+000	112.5	29.5	6.610368e+000	0	0	0	0	0	0	51.1907	1	1	54.1152	30
DATA	376	5	36	0	0	A_42_P714075	NM_031723	10777.3	221.014	7.898391e+002	7.904239e+001	804.5	29	7.883771e+000	0	0	0	0	0	0	763.397	1	1	47.2035	30.9231
DATA	377	5	37	0	0	A_42_P605265	NM_053677	10803.2	221.111	3.768187e+001	4.845566e+000	95	30	8.643054e+000	0	0	0	0	0	0	36.3421	1	1	47.8731	30.4643
DATA	378	5	38	0	0	A_64_P047401	NM_001009369	10828.1	221.104	2.962199e+003	2.962357e+002	2878	28	5.250050e+000	0	0	0	0	0	0	2850.44	1	1	46.8651	28.2857
DATA	379	5	39	0	0	A_64_P018891	A_64_P018891	10854	221	1.251502e+002	1.288393e+001	177	26	6.346706e+000	0	0	0	0	0	0	120.122	1	1	54.9904	26.8857
DATA	380	5	40	0	0	A_64_P026297	NM_022583	10878.6	220.545	1.236829e+002	1.274339e+001	163	28.5	6.674296e+000	0	0	0	0	0	0	118.401	1	1	38.6789	28.3158
DATA	381	5	41	0	0	A_43_P13508	NM_001015031	10904.7	220.878	4.889275e+001	5.777403e+000	106	31	8.750914e+000	0	0	0	0	0	0	46.6713	1	1	48.8603	31.3871
DATA	382	5	42	0	0	A_64_P077426	XM_001080794	10930	221.088	1.713474e+004	1.713477e+003	15692.5	31	7.642048e+000	0	0	0	0	0	0	16308	1	1	46.8651	30.6486
DATA	383	5	43	0	0	A_44_P370175	NM_031773	10955.3	221.014	6.637828e+001	7.324657e+000	129	32	7.229648e+000	0	0	0	0	0	0	62.9764	1	1	47.2035	32.963
DATA	384	5	44	0	0	A_64_P084288	NM_001000496	10980.9	221.065	5.216875e+000	3.150585e+000	66	33.5	8.507520e+000	0	0	0	0	0	0	4.93303	1	0	65	34.4706
DATA	385	5	45	0	0	A_44_P400936	A_44_P400936	11006.5	221.127	4.314297e+002	4.325549e+001	466	27	6.472060e+000	0	0	0	0	0	0	406.534	1	1	47.8731	29.0357
DATA	386	5	46	0	0	A_64_P019599	NM_012713	11031.6	221.427	3.989831e+002	4.002081e+001	430.5	32	8.670799e+000	0	0	0	0	0	0	374.635	1	1	57.5363	31.7
DATA	387	5	47	0	0	A_44_P644356	AI556299	11057.1	221.662	2.211682e+001	3.841339e+000	82	30	7.001152e+000	0	0	0	0	0	0	20.6893	1	1	49.8279	30.125
DATA	388	5	48	0	0	A_64_P057076	A_64_P057076	11082.4	221.5	1.306948e+002	1.344444e+001	184	32	6.592099e+000	0	0	0	0	0	0	121.782	1	1	48.5334	32.075
DATA	389	5	49	0	0	A_64_P087392	NM_001108764	11107.9	221.386	2.007444e+002	2.032256e+001	248.5	31	8.270750e+000	0	0	0	0	0	0	186.292	1	1	65	31.0303
DATA	390	5	50	0	0	A_44_P436604	NM_001025627	11133.4	221.427	1.971609e+001	3.740992e+000	78	30.5	1.125407e+001	0	0	0	0	0	0	18.2201	1	1	65	32.6333
DATA	391	5	51	0	0	A_43_P23200	NM_001107832	11158.6	221.427	5.583413e+002	5.592535e+001	576.5	31	9.030536e+000	0	0	0	0	0	0	513.778	1	1	57.5363	31.0333
DATA	392	5	52	0	0	A_42_P515876	NM_031097	11184.1	221.5	8.146824e+002	8.153134e+001	785.5	28	7.218436e+000	0	0	0	1	0	0	746.337	1	1	56.9804	28.5714
DATA	393	5	53	0	0	A_44_P1047924	NM_053523	11209.3	221.521	4.374689e+003	4.374807e+002	3885	29	6.709370e+000	0	0	0	0	0	0	3989.65	1	1	48.5334	28.8947
DATA	394	5	54	0	0	A_44_P682668	NM_001014228	11234.9	221.5	1.363151e+002	1.401052e+001	187	27	6.919637e+000	0	0	0	0	0	0	123.734	1	1	56.9804	28.7027
DATA	395	5	55	0	0	A_64_P061489	NM_001108746	11260.4	221.427	3.534775e+001	4.803395e+000	89.5	33	6.744074e+000	0	0	0	0	0	0	31.9314	1	1	65	33.0556
DATA	396	5	56	0	0	A_64_P047747	NM_182474	11286	221.722	1.902548e+003	1.902829e+002	1770	28.5	8.837010e+000	0	0	0	0	0	0	1710.34	1	1	47.8731	29.3125
DATA	397	5	57	0	0	A_64_P091163	NM_001107083	11311.1	221.5	4.511637e+001	5.580562e+000	103	28.5	8.413503e+000	0	0	0	0	0	0	40.3576	1	1	56.9804	30.25
DATA	398	5	58	0	0	A_64_P133992	NM_001008825	11336.5	221.507	1.148179e+002	1.194693e+001	165.5	28	6.460488e+000	0	0	0	0	0	0	102.188	1	1	49.1849	28.4375
DATA	399	5	59	0	0	A_42_P503768	NM_001009466	11361.6	221.632	3.423109e+002	3.439152e+001	361	27	4.668766e+000	0	0	0	0	0	0	303.114	1	1	49.5074	26.5938
DATA	400	5	60	0	0	A_44_P400346	ENSRNOT00000059540	11387.4	221.427	3.355735e+002	3.372274e+001	300	32	1.828420e+001	0	0	0	0	0	0	295.557	1	1	57.5363	38.3871
DATA	401	5	61	0	0	A_64_P128438	NM_012591	11412.4	221.705	2.134561e+003	2.134824e+002	1872	31	7.484240e+000	0	0	0	0	0	0	1870.31	1	1	50.4627	29.4231
DATA	402	5	62	0	0	A_44_P531758	NM_012935	11437.9	221.473	2.550582e+004	2.550584e+003	21602.5	26.5	9.071790e+000	0	0	0	0	0	0	22226.3	1	1	54.4085	28.3438
DATA	403	5	63	0	0	A_43_P10257	NM_203335	11462.9	221.587	5.666989e+003	5.667090e+002	4786	31	8.551208e+000	0	0	0	0	0	0	4912.06	1	1	48.8603	30.1379
DATA	404	5	64	0	0	A_64_P011744	NM_001108789	11488.4	221.611	3.462707e+002	3.479441e+001	362	33	7.551139e+000	0	0	0	0	0	0	298.483	1	1	48.2044	31.6552
DATA	405	5	65	0	0	A_44_P282794	NM_001107523	11514.3	221.5	1.482724e+002	1.521836e+001	184	27	6.895620e+000	0	0	0	0	0	0	127.08	1	1	57.5363	29.5429
DATA	406	5	66	0	0	A_42_P463784	NM_001008526	11539.5	221.5	1.120035e+003	1.120566e+002	1011	29	6.896260e+000	0	0	0	1	0	0	954.605	1	1	57.5363	30.5926
DATA	407	5	67	0	0	A_42_P630463	NM_022238	11564.8	221.699	5.490258e+002	5.501191e+001	529	29	7.265005e+000	0	0	0	0	0	0	465.318	1	1	48.2044	29.697
DATA	408	5	68	0	0	A_64_P006728	NM_001108905	11590.1	221.768	2.866114e+003	2.866326e+002	2390	31	7.364899e+000	0	0	0	0	0	0	2415.4	1	1	46.5243	30.6216
DATA	409	5	69	0	0	A_44_P360629	NM_001000030	11615.5	221.907	9.933568e+001	1.053422e+001	146	31	6.565502e+000	0	0	0	0	0	0	83.237	1	1	48.8603	31.0714
DATA	410	5	70	0	0	A_64_P024620	NM_001006995	11640.6	221.973	1.916366e+004	1.916370e+003	15513	33	6.736782e+000	0	0	0	0	0	0	15966.9	1	1	48.5334	32.2069
DATA	411	5	71	0	0	A_64_P091194	ENSRNOT00000049254	11666.4	221.973	1.016034e+004	1.016040e+003	8653	32	7.794715e+000	0	0	0	0	0	0	8415.62	1	1	48.5334	32.8485
DATA	412	5	72	0	0	A_44_P334922	NM_022379	11692	221.545	3.822690e+001	4.399549e+000	87	28	5.318046e+000	0	0	0	0	0	0	31.4746	1	1	65	27.8333
DATA	413	5	73	0	0	A_42_P482051	XM_001059157	11717.4	221.573	8.925838e+002	8.933052e+001	801.5	24.5	6.754258e+000	0	0	0	1	0	0	730.655	1	1	57.5363	25.5
DATA	414	5	74	0	0	A_42_P674742	XM_002726367	11742.6	221.5	6.386730e+003	6.386832e+002	5219.5	28	8.276412e+000	0	0	0	0	0	0	5197.85	1	1	48.5334	30.2188
DATA	415	5	75	0	0	A_64_P105211	XM_233310	11768.4	221.573	2.965328e+001	4.688290e+000	84	27	8.215147e+000	0	0	0	0	0	0	23.9916	1	1	57.5363	29.3636
DATA	416	5	76	0	0	A_64_P058523	NM_134385	11793.6	221.573	3.666612e+000	3.656239e+000	63	31	8.774719e+000	0	0	0	0	0	0	1.3577	0	0	57.5363	32.0645
DATA	417	5	77	0	0	A_44_P586876	NM_001100805	11818.5	221.784	1.593876e+003	1.594299e+002	1294.5	26	5.733847e+000	0	0	0	0	0	0	1274.97	1	1	48.8603	27.1765
DATA	418	5	78	66	1	DarkCorner	DarkCorner	11844.2	222	3.708621e+000	3.694187e+000	55	30	7.335787e+000	0	0	0	0	0	0	-7.89238	0	0	48.5334	29.2308
DATA	419	5	79	66	1	DarkCorner	DarkCorner	11869.8	221.839	3.730343e+000	3.715824e+000	51.5	33	9.084307e+000	0	0	0	0	0	0	-9.68412	0	0	53.8203	33.1034
DATA	420	5	80	66	1	DarkCorner	DarkCorner	11895	221.905	3.751452e+000	3.736851e+000	57	32	6.222115e+000	0	0	0	0	0	0	-6.11382	0	0	52.3208	32.2973
DATA	421	5	81	66	1	DarkCorner	DarkCorner	11920.8	221.919	3.773030e+000	3.758345e+000	59	31	7.152723e+000	0	0	0	0	0	0	-5.274	0	0	47.8731	31.9048
DATA	422	5	82	66	1	DarkCorner	DarkCorner	11945.9	221.614	3.794395e+000	3.779627e+000	54	29	6.435637e+000	0	0	0	0	0	0	-7.14749	0	0	57.259	29.8378
DATA	423	5	83	66	1	DarkCorner	DarkCorner	11970.6	221.988	3.814458e+000	3.799612e+000	58	30	7.471852e+000	0	0	0	0	0	0	-4.77888	0	0	50.4627	31.6286
DATA	424	5	84	66	1	DarkCorner	DarkCorner	11996.9	221.483	3.836851e+000	3.821917e+000	59	31.5	7.734901e+000	0	0	0	0	0	0	-2.73689	0	0	42.9674	31.3095
DATA	425	5	85	66	1	DarkCorner	DarkCorner	12022.3	222.247	3.856775e+000	3.841765e+000	61	30	8.098371e+000	0	0	0	0	0	0	-2.27193	0	0	49.8279	30.186
DATA	426	6	1	66	1	DarkCorner	DarkCorner	9901.38	227.826	3.239577e+000	3.232855e+000	61	28.5	7.959032e+000	0	0	0	0	0	0	1.7755	0	0	46.8651	28.8409
DATA	427	6	2	66	1	DarkCorner	DarkCorner	9927.01	227.743	3.220510e+000	3.207976e+000	56.5	30	9.768434e+000	0	0	0	0	0	0	-1.14657	0	0	46.8651	29.7955
DATA	428	6	3	66	1	DarkCorner	DarkCorner	9952.72	227.985	3.202187e+000	3.189844e+000	59	25	9.108309e+000	0	0	0	0	0	0	0.254562	0	0	46.1809	27.8065
DATA	429	6	4	66	1	DarkCorner	DarkCorner	9977.91	227.595	3.185514e+000	3.173116e+000	57	28	7.311338e+000	0	0	0	0	0	0	-2.45436	0	0	47.8731	28.2069
DATA	430	6	5	66	1	DarkCorner	DarkCorner	10003.3	228.386	3.169003e+000	3.156669e+000	59	27	4.902623e+000	0	0	0	0	0	0	-1.48583	0	0	46.8651	26.5357
DATA	431	6	6	66	1	DarkCorner	DarkCorner	10028.8	228.257	3.153767e+000	3.141493e+000	58	27	6.390616e+000	0	0	0	0	0	0	-1.66703	0	0	47.8731	27.3947
DATA	432	6	7	66	1	DarkCorner	DarkCorner	10054.4	228.051	3.139481e+000	3.127262e+000	52	28	7.542054e+000	0	0	0	0	0	0	-6.90221	0	0	49.1849	29.1515
DATA	433	6	8	66	1	DarkCorner	DarkCorner	10079.5	228.088	3.126182e+000	3.114015e+000	54	25	7.450312e+000	0	0	0	0	0	0	-4.17777	0	0	46.8651	27.5833
DATA	434	6	9	0	0	A_64_P034324	NM_001108282	10104.8	227.956	5.988542e+001	6.744056e+000	116	28.5	6.938551e+000	0	0	0	0	0	0	56.7282	1	1	46.5243	27.9118
DATA	435	6	10	0	0	A_64_P071506	ENSRNOT00000025007	10130.5	228	2.841520e+001	4.197663e+000	85	32	7.522011e+000	0	0	0	0	0	0	27.0205	1	1	54.1152	30.2258
DATA	436	6	11	0	0	A_64_P050705	NM_001106061	10155.4	228	1.186486e+002	1.225786e+001	170	26.5	4.072928e+000	0	0	0	0	0	0	113.216	1	1	48.5334	26.7273
DATA	437	6	12	0	0	A_64_P032242	NM_001008898	10181	228	1.139703e+001	3.273635e+000	74	30	7.879722e+000	0	0	0	0	0	0	10.9113	1	0	54.9904	30.0294
DATA	438	6	13	0	0	A_42_P730320	NM_001013877	10206.5	228	4.497333e+001	5.439357e+000	104	30	8.074347e+000	0	0	0	0	0	0	43.1877	1	1	54.1152	30.5152
DATA	439	6	14	0	0	A_64_P123073	A_64_P123073	10231.6	228.069	3.621366e+002	3.634196e+001	406	29	5.165654e+000	0	0	0	0	0	0	348.721	1	1	53.8203	29.2727
DATA	440	6	15	0	0	A_64_P064709	NM_001166303	10256.8	228.057	5.166726e+001	5.996441e+000	110	30	8.672746e+000	0	0	0	0	0	0	49.8786	1	1	40.6843	29.2963
DATA	441	6	16	0	0	A_44_P123381	NM_013012	10282.2	228.389	5.902080e+000	3.093101e+000	65.5	25	7.526839e+000	0	0	0	0	0	0	5.71113	1	0	46.8651	27.0714
DATA	442	6	17	0	0	A_44_P557487	NM_053617	10308.1	228.065	1.327665e+001	3.308142e+000	73	29	8.911083e+000	0	0	0	0	0	0	12.8735	1	0	54.4085	30
DATA	443	6	18	0	0	A_64_P084971	NM_017007	10333.4	228.171	4.355377e+004	4.355378e+003	42722	33	1.227255e+001	0	0	0	0	0	0	42308.5	1	1	51.0895	32.6667
DATA	444	6	19	0	0	A_42_P770556	NM_033096	10358.5	227.901	5.210911e+003	5.210998e+002	5063	31.5	8.459233e+000	0	0	0	1	0	0	5069.65	1	1	47.8731	32.6
DATA	445	6	20	0	0	A_64_P023381	XM_001073278	10384.4	228.427	4.937695e+001	5.785703e+000	108	30	7.877254e+000	0	0	0	0	0	0	48.1078	1	1	57.5363	32.3636
DATA	446	6	21	0	0	A_64_P059217	NM_053667	10409.6	228.427	3.099401e+002	3.114004e+001	358.5	32	1.078787e+001	0	0	0	0	0	0	302.307	1	1	57.5363	32.6333
DATA	447	6	22	0	0	A_44_P286215	NM_001008885	10435	228.268	1.635266e+002	1.662730e+001	221	30	1.007371e+001	0	0	0	0	0	0	159.637	1	1	47.2035	31.7097
DATA	448	6	23	0	0	A_64_P138056	A_64_P138056	10460.1	228	5.727422e+002	5.735315e+001	612.5	28	7.411934e+000	0	0	0	0	0	0	559.466	1	1	45.4864	27.1304
DATA	449	6	24	0	0	A_44_P280799	NM_001000654	10485.3	228.5	9.258177e+000	3.145593e+000	67	29	8.408726e+000	0	0	0	0	0	0	9.04807	1	0	47.8731	30.04
DATA	450	6	25	0	0	A_64_P111599	NM_001191586	10510.7	227.813	4.346979e+002	4.357360e+001	486	29	6.075086e+000	0	0	0	0	0	0	424.888	1	1	45.1352	29.64
DATA	451	6	26	0	0	A_64_P088635	ENSRNOT00000059643	10536.6	228.427	2.259033e+001	3.759942e+000	80	27	5.747642e+000	0	0	0	0	0	0	22.0822	1	1	57.5363	27.6538
DATA	452	6	27	0	0	A_64_P042332	NM_021860	10562	228.455	3.735230e+000	3.029420e+000	65.5	31	9.082951e+000	0	0	0	0	0	0	3.65041	1	0	55.8519	33.625
DATA	453	6	28	0	0	A_42_P599080	NM_053753	10587.2	227.87	8.027950e+001	8.572920e+000	137	33.5	8.663308e+000	0	0	0	0	0	0	78.417	1	1	46.1809	34.6429
DATA	454	6	29	0	0	A_44_P576954	NM_001106645	10612.6	228.427	4.346027e+002	4.356434e+001	450	37	7.794229e+000	0	0	0	0	0	0	424.278	1	1	57.5363	37.6
DATA	455	6	30	0	0	A_64_P046687	A_64_P046687	10637.9	228.506	4.651109e+003	4.651207e+002	4485.5	36.5	6.705341e+000	0	0	0	0	0	0	4536.81	1	1	50.4627	35.8947
DATA	456	6	31	0	0	A_42_P694928	NM_001109046	10663.5	228.541	2.402797e+002	2.421642e+001	295	32.5	6.818640e+000	0	0	0	0	0	0	234.128	1	1	49.1849	32.4231
DATA	457	6	32	0	0	A_64_P032811	NM_001134575	10689.2	228.447	1.262155e+002	1.297761e+001	180	30.5	5.459360e+000	0	0	0	0	0	0	122.827	1	1	49.8279	31.2692
DATA	458	6	33	0	0	A_64_P141070	ENSRNOT00000058701	10714.4	228.427	1.185631e+002	1.223574e+001	175	32	7.079272e+000	0	0	0	0	0	0	115.213	1	1	57.5363	33.2333
DATA	459	6	34	0	0	A_64_P093462	NM_001108129	10739.4	228.232	1.690093e+004	1.690096e+003	16012	30.5	8.178392e+000	0	0	0	0	0	0	16396.4	1	1	46.8651	29.2188
DATA	460	6	35	0	0	A_42_P799306	ENSRNOT00000015782	10765.1	228.5	1.716748e+002	1.743351e+001	222	28	7.528173e+000	0	0	0	0	0	0	166.248	1	1	56.9804	29.8125
DATA	461	6	36	0	0	A_42_P726743	NM_001108985	10790.2	228.344	1.148330e+003	1.148732e+002	1151	31	9.205028e+000	0	0	0	0	0	0	1109.79	1	1	45.4864	29.6944
DATA	462	6	37	0	0	A_44_P228341	NM_001025701	10815.6	228.405	1.980616e+003	1.980851e+002	1853	28	7.675226e+000	0	0	0	0	0	0	1909.96	1	1	49.5074	28.6364
DATA	463	6	38	0	0	A_42_P571433	NM_031059	10841.3	228.797	1.632318e+003	1.632604e+002	1576	28	6.553261e+000	0	0	0	0	0	0	1570.37	1	1	49.1849	28.9737
DATA	464	6	39	0	0	A_44_P132783	NM_214833	10866.6	228.573	2.310625e+002	2.330823e+001	278	27.5	6.662729e+000	0	0	0	0	0	0	221.722	1	1	57.5363	28.7667
DATA	465	6	40	0	0	A_44_P119215	NM_001108941	10892.1	228.5	2.327650e+001	3.852841e+000	81.5	31	8.491712e+000	0	0	0	0	0	0	22.2742	1	1	65	31.4762
DATA	466	6	41	0	0	A_44_P124259	XM_345871	10917.5	228.5	2.908330e+001	4.235516e+000	89.5	32	7.896707e+000	0	0	0	0	0	0	27.7504	1	1	65	32.2286
DATA	467	6	42	0	0	A_44_P422063	NM_001107631	10942.7	228.5	9.930235e+001	1.039945e+001	155	32	6.823820e+000	0	0	0	0	0	0	94.4643	1	1	57.5363	31.625
DATA	468	6	43	0	0	A_44_P1033023	NM_013063	10967.9	228.5	7.460645e+003	7.460709e+002	6822.5	35	7.500538e+000	0	0	0	0	0	0	7074.52	1	1	47.8731	35.25
DATA	469	6	44	0	0	A_64_P121618	NM_001134542	10993.4	228.594	3.897965e+002	3.910343e+001	424.5	27	6.690981e+000	0	0	0	0	0	0	368.376	1	1	47.5395	28.6667
DATA	470	6	45	0	0	A_64_P042188	ENSRNOT00000034890	11018.9	228.764	6.243379e+003	6.243457e+002	5824.5	29.5	7.731653e+000	0	0	0	0	0	0	5879.59	1	1	47.8731	29.5385
DATA	471	6	46	0	0	A_42_P561616	AI234869	11044.4	228.573	7.038870e+002	7.045832e+001	691	31.5	8.164211e+000	0	0	0	0	0	0	660.408	1	1	57.5363	30.6842
DATA	472	6	47	0	0	A_42_P588606	NM_001134544	11069.6	228.573	2.065226e+002	2.089011e+001	252	31	6.166871e+000	0	0	0	0	0	0	193.034	1	1	57.5363	31.697
DATA	473	6	48	0	0	A_42_P568897	NM_001005563	11095.3	228.847	7.218585e+002	7.225480e+001	728	32	6.899045e+000	0	0	0	0	0	0	672.047	1	1	47.8731	30.9444
DATA	474	6	49	0	0	A_64_P096356	NM_012640	11120.4	228.517	3.007066e+004	3.007067e+003	27604	31	1.035322e+001	0	0	0	0	0	0	27880.8	1	1	52.9257	32.6786
DATA	475	6	50	0	0	A_64_P006418	A_64_P006418	11146.1	228.587	7.911009e+003	7.911073e+002	7414.5	29.5	9.121934e+000	0	0	0	0	0	0	7303.8	1	1	53.8203	30.125
DATA	476	6	51	0	0	A_64_P156389	A_64_P156389	11171.7	228.739	9.208428e+001	9.747345e+000	149	28	6.406727e+000	0	0	0	0	0	0	84.647	1	1	47.2035	26.6154
DATA	477	6	52	0	0	A_42_P576446	NM_001107673	11196.3	228.592	4.302310e+003	4.302429e+002	3804	29	1.130182e+001	0	0	0	0	0	0	3937.64	1	1	47.8731	32.7419
DATA	478	6	53	0	0	A_64_P022804	A_64_P022804	11222	229.114	1.565945e+003	1.566277e+002	1469	29	6.747604e+000	0	0	0	0	0	0	1426.71	1	1	46.8651	29.1111
DATA	479	6	54	0	0	A_64_P162356	A_64_P162356	11247.2	229.065	7.994771e+003	7.994836e+002	7019	31.5	7.158079e+000	0	0	0	0	0	0	7250.01	1	1	45.4864	31.1429
DATA	480	6	55	0	0	A_44_P266776	NM_199388	11273	229.243	7.938473e+002	7.945146e+001	753	32	7.043915e+000	0	0	0	0	0	0	716.414	1	1	46.8651	30.7436
DATA	481	6	56	0	0	A_64_P035066	NM_001008960	11298.4	228.573	6.803832e+000	3.341969e+000	69	29	8.848339e+000	0	0	0	0	0	0	6.10943	1	0	57.5363	30.6897
DATA	482	6	57	0	0	A_64_P072728	NM_001100667	11323.3	228.754	7.593263e+003	7.593334e+002	6549.5	30	7.246198e+000	0	0	0	0	0	0	6785.24	1	1	45.1352	29.6897
DATA	483	6	58	0	0	A_64_P028446	NM_001106007	11348.8	228.806	2.150418e+003	2.150672e+002	1864	27	5.189552e+000	0	0	0	0	0	0	1911.82	1	1	47.5395	27.1875
DATA	484	6	59	0	0	A_44_P251212	NM_031715	11374.1	228.691	2.858552e+004	2.858554e+003	24715	31	1.112159e+001	0	0	0	0	0	0	25282.4	1	1	45.835	33.2414
DATA	485	6	60	0	0	A_42_P818240	NM_001108334	11399.7	228.781	1.677944e+004	1.677947e+003	14311	30	5.498918e+000	0	0	0	0	0	0	14762.5	1	1	48.2044	30.3571
DATA	486	6	61	0	0	A_64_P023122	NM_001080208	11425.5	228.569	6.210980e+001	7.060496e+000	116	29	8.468097e+000	0	0	0	0	0	0	54.3466	1	1	45.4864	28.9688
DATA	487	6	62	0	0	A_44_P217821	NM_001107292	11450.7	228.945	3.705410e+002	3.720752e+001	376	30	7.968689e+000	0	0	0	0	0	0	322.522	1	1	48.8603	30.2
DATA	488	6	63	0	0	A_64_P007372	NM_001105895	11476.4	228.931	2.258927e+001	4.077167e+000	84	27	7.282653e+000	0	0	0	0	0	0	19.5534	1	1	53.8203	28
DATA	489	6	64	0	0	A_42_P792382	NM_017257	11501.5	229	6.063437e+003	6.063534e+002	5197.5	30	6.736600e+000	0	0	0	0	0	0	5220.07	1	1	54.1152	31.1034
DATA	490	6	65	0	0	A_43_P12232	NM_022512	11526.6	229	2.157694e+003	2.157967e+002	1855	30	1.009446e+001	0	0	0	0	0	0	1847.37	1	1	48.5334	31.75
DATA	491	6	66	0	0	A_64_P158475	A_64_P158475	11552.1	229	8.052292e+003	8.052366e+002	6820	30	6.587740e+000	0	0	0	0	0	0	6855.46	1	1	46.8651	30.8857
DATA	492	6	67	0	0	A_64_P043361	NM_001197023	11577.4	229	1.016192e+002	1.073819e+001	145	33	6.361849e+000	0	0	0	0	0	0	86.0291	1	1	45.4864	32.1613
DATA	493	6	68	0	0	A_64_P080851	NM_001105753	11602.8	228.727	4.125322e+001	5.403936e+000	99.5	29.5	7.373060e+000	0	0	0	0	0	0	34.7229	1	1	45.835	29.4474
DATA	494	6	69	0	0	A_44_P129330	NM_001107505	11628.3	229	9.790382e+002	9.796674e+001	863	30	7.283211e+000	0	0	0	0	0	0	819.395	1	1	48.5334	30.6129
DATA	495	6	70	0	0	A_64_P008827	NM_001014012	11653.4	229.028	1.962400e+003	1.962717e+002	1700	30	6.505271e+000	0	0	0	0	0	0	1633.1	1	1	48.2044	30.9375
DATA	496	6	71	0	0	A_64_P026222	NM_001101019	11679.5	229	7.303890e+001	8.121555e+000	122	30	8.194607e+000	0	0	0	0	0	0	60.4234	1	1	54.1152	30.6389
DATA	497	6	72	0	0	A_64_P067749	NM_012659	11704.9	229.014	3.371869e+004	3.371871e+003	27251.5	27	6.785798e+000	0	0	0	0	0	0	27733.8	1	1	46.8651	27.2
DATA	498	6	73	0	0	A_44_P362981	NM_145878	11729.9	228.907	3.060466e+004	3.060468e+003	25492.5	27	9.990472e+000	0	0	0	0	0	0	25028.7	1	1	46.8651	29.4286
DATA	499	6	74	0	0	A_64_P146654	NM_031698	11755.5	229	1.941820e+003	1.942157e+002	1657	27.5	7.550305e+000	0	0	0	0	0	0	1578.86	1	1	48.5334	29.4211
DATA	500	6	75	0	0	A_42_P548800	NM_001007696	11780.8	229	5.710647e+003	5.710763e+002	4574	32.5	7.742802e+000	0	0	0	0	0	0	4616.59	1	1	46.8651	31.5588
DATA	501	6	76	0	0	A_44_P310581	BG673348	11806.1	229.2	3.865771e+003	3.865943e+002	3136	28	7.527727e+000	0	0	0	0	0	0	3107.45	1	1	46.8651	30
DATA	502	6	77	0	0	A_64_P062269	XM_001067531	11831.3	229.365	2.287342e+002	2.316689e+001	247	28	6.651604e+000	0	0	0	0	0	0	182.826	1	1	44.4243	28.6207
DATA	503	6	78	66	1	DarkCorner	DarkCorner	11857.1	229.386	3.711573e+000	3.697127e+000	58	31	7.749575e+000	0	0	0	0	0	0	-6.67264	0	0	57.259	31.5484
DATA	504	6	79	66	1	DarkCorner	DarkCorner	11882.5	229.352	3.732770e+000	3.718242e+000	50	33	7.760667e+000	0	0	0	0	0	0	-11.5161	0	0	57.5363	32.8065
DATA	505	6	80	66	1	DarkCorner	DarkCorner	11908.3	230.065	3.753389e+000	3.738780e+000	54.5	34	7.198178e+000	0	0	0	0	0	0	-8.3992	0	0	45.1352	33.2308
DATA	506	6	81	66	1	DarkCorner	DarkCorner	11932.9	228.927	3.775142e+000	3.760449e+000	53	29	6.997208e+000	0	0	0	0	0	0	-6.68854	0	0	51.0895	30.7333
DATA	507	6	82	66	1	DarkCorner	DarkCorner	11958.2	229.041	3.795875e+000	3.781101e+000	59	29	7.662645e+000	0	0	0	0	0	0	-2.95446	0	0	47.5395	30.871
DATA	508	6	83	66	1	DarkCorner	DarkCorner	11983.7	229.275	3.816546e+000	3.801692e+000	56.5	29	7.359209e+000	0	0	0	0	0	0	-5.24192	0	0	50.7771	30.8095
DATA	509	6	84	66	1	DarkCorner	DarkCorner	12009.6	229.305	3.837634e+000	3.822698e+000	59	29	6.359819e+000	0	0	0	0	0	0	-2.69009	0	0	51.0895	28.7037
DATA	510	6	85	66	1	DarkCorner	DarkCorner	12034.8	229.122	3.858279e+000	3.849591e+000	63	29	7.386631e+000	0	0	0	0	0	0	1.68681	0	0	50.7771	30.0757
DATA	511	7	1	66	1	DarkCorner	DarkCorner	9888.85	235.014	5.390120e+000	3.276965e+000	64	26	6.613781e+000	0	0	0	0	0	0	4.89937	1	0	46.8651	26.4075
DATA	512	7	2	66	1	DarkCorner	DarkCorner	9914.5	235	3.225499e+000	3.213332e+000	60.5	32	8.927185e+000	0	0	0	0	0	0	0.455731	0	0	54.1152	32.8065
DATA	513	7	3	66	1	DarkCorner	DarkCorner	9939.97	235.264	3.206986e+000	3.194504e+000	55	24.5	9.667973e+000	0	0	0	0	0	0	-2.94135	0	0	47.2035	27.5
DATA	514	7	4	66	1	DarkCorner	DarkCorner	9965.39	235.069	3.189711e+000	3.177297e+000	58	24	1.001612e+001	0	0	0	0	0	0	-2.51993	0	0	53.8203	27.4138
DATA	515	7	5	66	1	DarkCorner	DarkCorner	9990.5	235	3.173483e+000	3.161131e+000	55.5	28	8.949915e+000	0	0	0	0	0	0	-4.44146	0	0	54.1152	28.3793
DATA	516	7	6	66	1	DarkCorner	DarkCorner	10016	235.455	3.157634e+000	3.145345e+000	51	27	5.278602e+000	0	0	0	0	0	0	-7.40086	0	0	55.8519	27.3636
DATA	517	7	7	66	1	DarkCorner	DarkCorner	10041.2	236.136	3.142726e+000	3.130494e+000	60.5	28.5	6.436337e+000	0	0	0	0	0	0	-1.32283	0	0	45.835	28.4333
DATA	518	7	8	66	1	DarkCorner	DarkCorner	10066.4	235.5	3.129364e+000	3.117184e+000	55	26	7.238509e+000	0	0	0	0	0	0	-4.5388	0	0	51.7088	29.3704
DATA	519	7	9	0	0	A_64_P051297	NM_001107416	10092.2	235.301	3.573298e+003	3.573433e+002	3403	26.5	7.932031e+000	0	0	0	0	0	0	3382.03	1	1	48.2044	27.8529
DATA	520	7	10	0	0	A_64_P162378	A_64_P162378	10117.6	235.427	5.402530e+004	5.402530e+003	50755.5	30	7.524947e+000	0	0	0	0	0	0	51333.4	1	1	57.5363	30.1795
DATA	521	7	11	0	0	A_64_P030634	ENSRNOT00000042606	10142.9	235.169	1.182569e+002	1.222046e+001	171.5	28	6.849574e+000	0	0	0	0	0	0	112.768	1	1	46.8651	28.2
DATA	522	7	12	0	0	A_64_P110009	NM_024392	10168.4	235.36	8.971363e+003	8.971416e+002	8409.5	26	8.603966e+000	0	0	0	0	0	0	8584.31	1	1	48.8603	27.6875
DATA	523	7	13	0	0	A_42_P618145	NM_001080783	10193.8	235.418	3.209558e+003	3.209704e+002	3022	31	7.443551e+000	0	0	0	0	0	0	3080.75	1	1	53.2255	31.1613
DATA	525	7	15	0	0	A_64_P101770	NM_001000074	10244.6	235.427	7.903423e+000	3.144898e+000	67.5	31	8.870435e+000	0	0	0	0	0	0	7.62838	1	0	65	30.2692
DATA	526	7	16	0	0	A_42_P735934	NM_001105729	10269.6	235.781	6.153818e+003	6.153893e+002	6182.5	25	7.983034e+000	0	0	0	0	0	0	5954.05	1	1	44.7812	27.3929
DATA	528	7	18	0	0	A_42_P718331	NM_133522	10320.7	235.373	1.881594e+003	1.881837e+002	1867	28	8.792186e+000	0	0	0	0	0	0	1827.92	1	1	49.1849	28.4583
DATA	529	7	19	0	0	A_64_P118054	NM_001037651	10346.1	235.5	1.333552e+001	3.300572e+000	74.5	28	6.651333e+000	0	0	0	0	0	0	12.9771	1	0	56.9804	28.9667
DATA	530	7	20	0	0	A_64_P044613	A_64_P044613	10371.5	235.5	8.140596e+004	8.140597e+003	80428	30	8.169372e+000	0	0	0	0	0	0	79333.5	1	1	57.5363	30.6364
DATA	531	7	21	0	0	A_43_P13241	NM_134334	10396.8	235.811	2.963837e+004	2.963839e+003	28362	30	6.477940e+000	0	0	0	0	0	0	28920.1	1	1	48.5334	30.1875
DATA	532	7	22	0	0	A_44_P524748	NM_001000712	10422.4	235.427	4.574111e+000	3.042715e+000	65	34	1.062203e+001	0	0	0	0	0	0	4.46752	1	0	57.5363	33.5517
DATA	533	7	23	0	0	A_64_P126797	ENSRNOT00000048363	10447.4	235.556	9.523832e+001	9.986908e+000	155.5	27	7.777350e+000	0	0	0	0	0	0	93.0906	1	1	48.2044	27.1111
DATA	535	7	25	0	0	A_42_P730411	NM_001012181	10498.3	235.348	6.639842e+002	6.646631e+001	702.5	31.5	5.849392e+000	0	0	0	0	0	0	649.558	1	1	47.2035	30.8462
DATA	536	7	26	0	0	A_64_P049501	NM_001047970	10523.7	235.429	4.861714e+001	5.714365e+000	104	30	5.843076e+000	0	0	0	0	0	0	47.5662	1	1	49.8279	30.3077
DATA	537	7	27	0	0	A_42_P623688	NM_031031	10548.6	235.37	5.784967e+003	5.785045e+002	5590.5	29	8.321579e+000	0	0	0	0	0	0	5659.27	1	1	48.2044	30.7143
DATA	538	7	28	0	0	A_42_P601217	NM_053460	10574.4	235.64	1.691435e+002	1.717906e+001	223	33	9.100019e+000	0	0	0	0	0	0	165.419	1	1	48.8603	34.8966
DATA	540	7	30	0	0	A_42_P791872	NM_001135174	10625.1	235.936	8.609125e+003	8.609177e+002	8167.5	36.5	7.696813e+000	0	0	0	0	0	0	8409.17	1	1	49.1849	36.2813
DATA	542	7	32	0	0	A_44_P557172	NM_177936	10676.5	236.319	6.309080e+001	6.992101e+000	123	31	7.663299e+000	0	0	0	0	0	0	61.498	1	1	46.8651	30.3846
DATA	543	7	33	0	0	A_64_P118812	NM_001000512	10701.6	235.573	1.200410e+002	1.237778e+001	153	31	5.960518e+000	0	0	0	0	0	0	116.844	1	1	57.5363	31.25
DATA	544	7	34	0	0	A_64_P019425	NM_172035	10727	235.545	3.058731e+002	3.073634e+001	361	32	7.285533e+000	0	0	0	0	0	0	297.267	1	1	55.8519	30.2571
DATA	545	7	35	0	0	A_42_P726743	NM_001108985	10752.1	235.718	1.231221e+003	1.231593e+002	1221.5	28	7.966632e+000	0	0	0	0	0	0	1194.56	1	1	47.2035	28.9429
DATA	546	7	36	0	0	A_42_P558703	NM_001106810	10777.5	235.711	4.711962e+002	4.721720e+001	494	28	8.191693e+000	0	0	0	0	0	0	456.291	1	1	49.1849	29.8438
DATA	547	7	37	0	0	A_42_P619806	TC590118	10803.4	235.933	6.015073e+002	6.022753e+001	636	31	9.164656e+000	0	0	0	0	0	0	581.249	1	1	48.8603	31.4063
DATA	548	7	38	0	0	A_64_P072247	XM_001055615	10828.1	236.032	7.039034e+001	7.670270e+000	128	30	7.116258e+000	0	0	0	0	0	0	67.8702	1	1	45.4864	31.5625
DATA	549	7	39	0	0	A_64_P104164	A_64_P104164	10853.7	236.254	1.272616e+004	1.272620e+003	12431.5	27.5	6.528892e+000	0	0	0	0	0	0	12240.5	1	1	45.835	27.8333
DATA	550	7	40	0	0	A_42_P672103	NM_021770	10879.3	236.222	1.717685e+004	1.717688e+003	16564	29.5	7.544734e+000	0	0	0	0	0	0	16477.7	1	1	47.2035	30.3611
DATA	551	7	41	0	0	A_64_P090942	NM_001000406	10904.6	235.573	2.238036e+001	3.800412e+000	82.5	32	8.781868e+000	0	0	0	0	0	0	21.4076	1	1	57.5363	31.0606
DATA	552	7	42	0	0	A_64_P149491	ENSRNOT00000025458	10930	236.053	5.897550e+001	6.653594e+000	116	34	5.096910e+000	0	0	0	0	0	0	56.2489	1	1	46.8651	33.6129
DATA	553	7	43	0	0	A_42_P552441	NR_002704	10955.3	235.9	1.949372e+004	1.949375e+003	17851.5	35	9.205772e+000	0	0	0	0	0	0	18534.3	1	1	47.2035	34.7097
DATA	554	7	44	0	0	A_64_P060419	ENSRNOT00000055060	10980.9	235.614	3.112607e+000	3.100492e+000	61.5	32	6.164087e+000	0	0	0	0	0	0	-0.175312	0	0	65	30.9375
DATA	555	7	45	0	0	A_44_P161233	NM_019165	11006.4	236	8.405116e+002	8.410871e+001	819	27	6.377042e+000	0	0	0	0	0	0	793.778	1	1	48.5334	28.1667
DATA	556	7	46	66	-1	(-)3xSLv1	NegativeControl	11030.7	236.294	3.133754e+000	3.121557e+000	58	31.5	8.675547e+000	0	0	0	0	0	0	-5.05401	0	0	40.2912	31.3438
DATA	557	7	47	0	0	A_43_P12519	NM_031114	11056.6	235.973	6.770469e+003	6.770542e+002	6142	31	7.869797e+000	0	0	0	0	0	0	6347.99	1	1	48.5334	30.9394
DATA	558	7	48	0	0	A_44_P317600	NM_012612	11082	236	6.968386e+002	6.975482e+001	690	32	6.719284e+000	0	0	0	0	0	0	650.834	1	1	46.8651	31.4146
DATA	559	7	49	0	0	A_64_P034166	A_64_P034166	11107.9	235.935	4.095658e+000	3.185060e+000	67	31.5	9.427034e+000	0	0	0	0	0	0	3.80964	1	0	65	31.6
DATA	560	7	50	0	0	A_64_P024585	NM_001109337	11133.5	236	3.917278e+000	3.195873e+000	63	30	7.775884e+000	0	0	0	0	0	0	3.6286	1	0	54.1152	29.5333
DATA	561	7	51	0	0	A_42_P654682	NM_012724	11158.5	236	4.068740e+000	3.210991e+000	65	27.5	9.967872e+000	0	0	0	0	0	0	3.75313	1	0	65	30.1071
DATA	562	7	52	0	0	A_42_P524610	NM_001108992	11183.8	235.986	2.171146e+003	2.171381e+002	1990.5	31	9.135272e+000	0	0	0	0	0	0	1993.99	1	1	46.8651	31.1034
DATA	563	7	53	0	0	A_64_P046677	NM_020093	11209.5	236	1.168430e+001	3.419465e+000	75	30.5	7.899920e+000	0	0	0	0	0	0	10.6822	1	0	54.1152	30.6389
DATA	564	7	54	0	0	A_64_P042742	XM_001061779	11234.9	235.935	5.598346e+002	5.607648e+001	574	28	6.890273e+000	0	0	0	0	0	0	509.46	1	1	54.4085	29.2
DATA	565	7	55	0	0	A_64_P058430	ENSRNOT00000062073	11259.9	236.042	1.797544e+001	3.708329e+000	77.5	31	7.335602e+000	0	0	0	0	0	0	16.2824	1	1	46.8651	31.6471
DATA	566	7	56	0	0	A_42_P479251	NM_001108686	11285.7	236.083	9.306312e+003	9.306370e+002	8236.5	34	8.291636e+000	0	0	0	0	0	0	8388.66	1	1	50.1463	33.5862
DATA	567	7	57	0	0	A_42_P777329	NM_001106943	11310.7	236	5.374235e+002	5.384207e+001	554	31	8.715454e+000	0	0	0	0	0	0	482.083	1	1	49.1849	29.3226
DATA	568	7	58	0	0	A_64_P103414	NM_001106472	11336.5	236	5.711785e+000	3.341211e+000	69	30	5.805665e+000	0	0	0	0	0	0	5.0976	1	0	54.1152	30.1333
DATA	569	7	59	0	0	A_64_P082164	A_64_P082164	11361.6	236.069	1.319956e+002	1.360792e+001	180	28	6.000000e+000	0	0	0	0	0	0	117.211	1	1	53.8203	29.2
DATA	570	7	60	0	0	A_42_P702729	NM_001107557	11387.1	236.149	1.930955e+003	1.931241e+002	1746	30	1.990202e+001	0	0	0	0	0	0	1705.81	1	1	47.5395	37.9032
DATA	571	7	61	0	0	A_64_P130922	A_64_P130922	11412.4	236.027	4.906108e+002	4.917488e+001	484	30	8.270429e+000	0	0	0	0	0	0	431.125	1	1	48.5334	30
DATA	572	7	62	0	0	A_42_P509843	NM_001100480	11437.8	236.27	5.727826e+002	5.737679e+001	556	26	9.083339e+000	0	0	0	0	0	0	500.682	1	1	47.8731	27.5938
DATA	573	7	63	0	0	A_64_P110759	A_64_P110759	11463.5	236.221	6.193249e+001	7.055337e+000	118	27	8.089692e+000	0	0	0	0	0	0	53.8413	1	1	49.1849	27.0357
DATA	574	7	64	0	0	A_64_P006235	A_64_P006235	11488.7	236.173	1.041245e+003	1.041799e+002	973	28	6.638775e+000	0	0	0	0	0	0	900.314	1	1	49.8279	28.64
DATA	575	7	65	0	0	A_44_P506064	NM_001191778	11514.4	236.427	1.433294e+002	1.473457e+001	181	33	1.217290e+001	0	0	0	0	0	0	123.247	1	1	57.5363	33.8889
DATA	576	7	66	0	0	A_64_P075425	A_64_P075425	11539.3	236.222	9.095105e+003	9.095170e+002	7803.5	29	7.663801e+000	0	0	0	0	0	0	7777.94	1	1	47.5395	30.4231
DATA	577	7	67	0	0	A_42_P544898	NM_001108279	11565	236.455	2.216308e+001	4.104742e+000	80	33	7.124435e+000	0	0	0	0	0	0	18.847	1	1	55.8519	32.1515
DATA	578	7	68	0	0	A_44_P837192	ENSRNOT00000038251	11590.2	236.577	1.984203e+001	4.000980e+000	78	29	5.700217e+000	0	0	0	0	0	0	16.7794	1	1	50.1463	29.3226
DATA	580	7	70	0	0	A_44_P325657	NM_001014007	11641.4	236.427	1.591934e+002	1.630268e+001	196.5	29	6.895240e+000	0	0	0	0	0	0	133.081	1	1	57.5363	30.5172
DATA	581	7	71	0	0	A_64_P004598	ENSRNOT00000024034	11666.7	236.694	3.280265e+002	3.299250e+001	337	29.5	7.841165e+000	0	0	0	0	0	0	272.683	1	1	48.2044	30.25
DATA	582	7	72	0	0	A_42_P607183	XM_001081723	11692	236.455	1.179821e+003	1.180357e+002	1038	29	7.730302e+000	0	0	0	1	0	0	975.11	1	1	55.8519	29.1515
DATA	584	7	74	0	0	A_42_P589190	NM_023104	11742.5	236.231	1.015708e+003	1.016344e+002	873	28	9.340441e+000	0	0	0	0	0	0	829.884	1	1	49.8279	29.6207
DATA	585	7	75	0	0	A_42_P757323	TC587630	11767.6	236.26	2.820928e+003	2.821160e+002	2323.5	30	7.564512e+000	0	0	0	1	0	0	2291.83	1	1	49.5074	27.8857
DATA	586	7	76	0	0	A_42_P688320	NM_001108569	11793.8	236.211	2.514690e+002	2.540868e+001	268	30	7.944392e+000	0	0	0	0	0	0	203.091	1	1	47.5395	30.3077
DATA	587	7	77	0	0	A_44_P224705	NM_031002	11818.9	236.5	1.060865e+002	1.122166e+001	147.5	26.5	8.639763e+000	0	0	0	0	0	0	85.2027	1	1	65	29.8571
DATA	588	7	78	0	0	A_42_P481849	NM_001100563	11843.7	236.627	1.707971e+003	1.708367e+002	1375	29.5	6.984712e+000	0	0	0	1	0	0	1364.18	1	1	49.1849	29.8
DATA	589	7	79	66	1	DarkCorner	DarkCorner	11869.6	236.427	3.714388e+000	3.699932e+000	51	35	8.635903e+000	0	0	0	0	0	0	-10.2706	0	0	57.5363	32.6897
DATA	590	7	80	66	1	DarkCorner	DarkCorner	11895.1	236.5	3.735366e+000	3.720827e+000	55	29.5	7.324969e+000	0	0	0	0	0	0	-7.84277	0	0	56.9804	30
DATA	591	7	81	66	1	DarkCorner	DarkCorner	11920.4	236.091	3.756668e+000	3.742047e+000	57	28	8.846131e+000	0	0	0	0	0	0	-6.31738	0	0	49.8279	31.4375
DATA	592	7	82	66	1	DarkCorner	DarkCorner	11946.1	236.542	3.777239e+000	3.762538e+000	57.5	27	7.771080e+000	0	0	0	0	0	0	-6.06589	0	0	51.0895	28.8056
DATA	593	7	83	66	1	DarkCorner	DarkCorner	11971	236.861	3.797156e+000	3.782377e+000	54	29	8.549288e+000	0	0	0	0	0	0	-7.29262	0	0	46.8651	31.0968
DATA	594	7	84	66	1	DarkCorner	DarkCorner	11996.6	236.427	3.818416e+000	3.803554e+000	55	32	9.591050e+000	0	0	0	0	0	0	-6.30622	0	0	65	32.2
DATA	595	7	85	66	1	DarkCorner	DarkCorner	12022.1	236.5	3.838863e+000	3.823922e+000	61	30	5.058220e+000	0	0	0	0	0	0	-0.601226	0	0	56.9804	29.4324
DATA	596	8	1	66	1	DarkCorner	DarkCorner	9901.82	241.892	3.230950e+000	3.219581e+000	60	28	6.848357e+000	0	0	0	0	0	0	0.804654	0	0	47.8731	28.15
DATA	597	8	2	66	1	DarkCorner	DarkCorner	9927.11	242.5	3.212027e+000	3.199525e+000	55	28	9.150358e+000	0	0	0	0	0	0	-1.67209	0	0	56.9804	29.7059
DATA	598	8	3	66	1	DarkCorner	DarkCorner	9952.48	242.571	3.194291e+000	3.181859e+000	56	23.5	4.491468e+000	0	0	0	0	0	0	-5.25707	0	0	49.8279	23.3929
DATA	599	8	4	66	1	DarkCorner	DarkCorner	9977.89	242.5	3.177530e+000	3.165163e+000	54	26.5	9.980172e+000	0	0	0	0	0	0	-3.52433	0	0	56.9804	27.4063
DATA	600	8	5	66	1	DarkCorner	DarkCorner	10003.4	242.913	3.161363e+000	3.149059e+000	54	28	7.822051e+000	0	0	0	0	0	0	-5.15341	0	0	46.8651	28.0938
DATA	601	8	6	66	1	DarkCorner	DarkCorner	10028.9	242.486	3.146510e+000	3.134264e+000	51	27	7.592331e+000	0	0	0	0	0	0	-8.06401	0	0	48.5334	28.4118
DATA	602	8	7	66	1	DarkCorner	DarkCorner	10054.1	242.5	3.132518e+000	3.120326e+000	54	26.5	5.975429e+000	0	0	0	0	0	0	-5.41658	0	0	56.9804	27.8667
DATA	603	8	8	0	0	A_44_P487081	NM_001033951	10078.8	243.091	5.423782e+002	5.432675e+001	572.5	28	7.450214e+000	0	0	0	0	0	0	512.855	1	1	46.1809	28.4545
DATA	604	8	9	0	0	A_64_P054403	NM_001170340	10104.7	242.461	2.770875e+002	2.788105e+001	327	28	8.355414e+000	0	0	0	0	0	0	263.047	1	1	49.5074	28.3947
DATA	605	8	10	0	0	A_44_P665685	NM_001109325	10130.4	242.573	1.121464e+001	3.280733e+000	69	29	7.831560e+000	0	0	0	0	0	0	10.687	1	0	57.5363	29.8889
DATA	606	8	11	0	0	A_42_P531684	NM_001014215	10155.7	242.473	2.777392e+002	2.794335e+001	319	24	7.123532e+000	0	0	0	0	0	0	265.587	1	1	48.8603	24.6786
DATA	607	8	12	0	0	A_42_P722904	ENSRNOT00000006525	10180.8	242.625	2.132852e+003	2.133072e+002	2061	28.5	8.507113e+000	0	0	0	0	0	0	2046.13	1	1	47.8731	29.375
DATA	608	8	13	0	0	A_42_P514057	NM_031839	10206.5	242.648	1.353919e+001	3.340005e+000	74	30.5	8.558091e+000	0	0	0	0	0	0	13.0282	1	0	57.5363	30.7188
DATA	609	8	14	0	0	A_64_P087459	A_64_P087459	10231.6	242.573	8.422632e+004	8.422632e+003	81084.5	31	7.326482e+000	0	0	0	0	0	0	81267	1	1	57.5363	29.9655
DATA	610	8	15	0	0	A_42_P581060	NM_001108722	10256.8	243.265	1.258111e+004	1.258114e+003	11798	29	7.655128e+000	0	0	0	0	0	0	12170.5	1	1	46.1809	28.6207
DATA	611	8	16	0	0	A_42_P658220	NM_001109598	10282.1	243.115	2.435813e+003	2.436002e+002	2388	26	7.480584e+000	0	0	0	0	0	0	2361.62	1	1	44.7812	28.6774
DATA	612	8	17	0	0	A_42_P758454	NM_001108101	10307.7	242.889	1.516873e+002	1.546727e+001	201	28	7.067265e+000	0	0	0	0	0	0	147.364	1	1	47.8731	27.7097
DATA	613	8	18	0	0	A_64_P140956	NM_001013141	10333.2	242.897	4.749638e+002	4.759222e+001	508.5	26	7.329996e+000	0	0	0	0	0	0	462.258	1	1	46.5243	26.6071
DATA	614	8	19	0	0	A_42_P508984	NM_001007729	10358.7	242.9	2.919943e+002	2.935458e+001	347	28	7.124545e+000	0	0	0	0	0	0	284.63	1	1	47.2035	28.6774
DATA	615	8	20	0	0	A_42_P619008	NM_001013079	10383.8	243	5.104818e+003	5.104907e+002	4958	30	6.765345e+000	0	0	0	0	0	0	4982.67	1	1	46.1809	29.3548
DATA	616	8	21	0	0	A_64_P058351	NM_017101	10409.5	243	8.717246e+004	8.717246e+003	85572.5	34	9.144570e+000	0	0	0	0	0	0	85181.7	1	1	54.1152	34.1379
DATA	617	8	22	0	0	A_64_P083800	XM_001058776	10434.6	242.973	4.844172e+001	5.700064e+000	107	34	1.800691e+001	0	0	0	0	0	0	47.3762	1	1	48.5334	38.9655
DATA	618	8	23	0	0	A_64_P028088	NM_001106073	10460.4	243	5.482660e+002	5.490874e+001	579.5	26	6.924501e+000	0	0	0	0	0	0	536.563	1	1	48.5334	26.2222
DATA	619	8	24	0	0	A_44_P105441	ENSRNOT00000042202	10485.7	242.909	1.840302e+004	1.840305e+003	17870	28.5	7.101138e+000	0	0	0	0	0	0	18017.7	1	1	49.1849	28.1154
DATA	620	8	25	0	0	A_42_P675802	NM_145777	10511.3	242.847	2.117201e+003	2.117414e+002	2047.5	29	6.197831e+000	0	0	0	0	0	0	2073.29	1	1	47.8731	29.4815
DATA	621	8	26	0	0	A_64_P018525	ENSRNOT00000027134	10536.7	242.811	5.039255e+002	5.048179e+001	552	27.5	8.380688e+000	0	0	0	0	0	0	493.467	1	1	48.2044	31.0455
DATA	622	8	27	0	0	A_42_P749382	NM_001106731	10561.9	242.882	8.576636e+003	8.576688e+002	8177	33	7.371880e+000	0	0	0	0	0	0	8396.87	1	1	47.8731	34.2308
DATA	623	8	28	0	0	A_44_P316364	NM_001077675	10587.5	243	7.075847e+000	3.084457e+000	67.5	33	8.740528e+000	0	0	0	0	0	0	6.92463	1	0	54.1152	34.7857
DATA	624	8	29	0	0	A_64_P143596	ENSRNOT00000060139	10612.6	243.092	1.011363e+002	1.055035e+001	156	33	7.582875e+000	0	0	0	0	0	0	98.9137	1	1	49.1849	34.25
DATA	625	8	30	0	0	A_42_P468723	NM_001191689	10638	243.095	5.616644e+002	5.624686e+001	612	34	6.720438e+000	0	0	0	0	0	0	548.859	1	1	46.8651	32.9167
DATA	626	8	31	0	0	A_42_P533792	NM_001106575	10663.1	243.116	1.024870e+004	1.024874e+003	9660	33.5	9.040623e+000	0	0	0	0	0	0	10004.8	1	1	46.8651	32.5938
DATA	627	8	32	0	0	A_43_P16773	XM_217313	10688.7	243.154	6.775471e+002	6.782169e+001	725	35	6.810625e+000	0	0	0	0	0	0	660.597	1	1	49.1849	35
DATA	628	8	33	0	0	A_42_P765830	NM_001106426	10714.1	243.104	1.653176e+004	1.653179e+003	15562.5	35	7.169617e+000	0	0	0	0	0	0	16095	1	1	46.8651	33.8182
DATA	629	8	34	0	0	A_43_P15073	ENSRNOT00000030771	10739.5	243	2.034298e+002	2.056632e+001	249	28	7.950843e+000	0	0	0	0	0	0	197.731	1	1	54.1152	27.8182
DATA	630	8	35	0	0	A_42_P538527	NM_001108885	10764.9	243.192	1.038172e+003	1.038614e+002	1120.5	27	5.118697e+000	0	0	0	0	0	0	1007.29	1	1	47.5395	26.8571
DATA	631	8	36	0	0	A_64_P037130	A_64_P037130	10790	243.288	3.045939e+000	3.034084e+000	58	28	8.977582e+000	0	0	0	0	0	0	-4.40135	0	0	43.7019	29.5238
DATA	632	8	37	0	0	A_44_P536115	NM_023957	10815.3	243.014	3.850938e+003	3.851058e+002	3588	31	9.220087e+000	0	0	0	0	0	0	3720.83	1	1	47.2035	31.48
DATA	633	8	38	0	0	A_43_P11800	NM_017059	10841.4	243.427	1.986629e+002	2.009875e+001	254	28	6.215045e+000	0	0	0	0	0	0	191.497	1	1	57.5363	28.6296
DATA	634	8	39	0	0	A_64_P004922	NM_001191924	10866.4	243.295	3.258939e+003	3.259083e+002	3063	28.5	7.396881e+000	0	0	0	0	0	0	3133.52	1	1	50.4627	28.9231
DATA	635	8	40	0	0	A_64_P145058	NM_001107951	10892.1	243.386	7.017967e+002	7.024653e+001	744	32	9.203942e+000	0	0	0	0	0	0	672.956	1	1	57.259	31.8462
DATA	636	8	41	0	0	A_64_P075372	A_64_P075372	10917.5	243.352	3.818068e+001	4.900975e+000	98	32.5	6.635605e+000	0	0	0	0	0	0	36.5066	1	1	65	31.0313
DATA	637	8	42	0	0	A_64_P118792	NM_001107034	10942.6	243.427	2.898414e+001	4.230740e+000	92	34	7.250616e+000	0	0	0	0	0	0	27.6308	1	1	57.5363	34.1429
DATA	638	8	43	0	0	A_42_P469685	NM_001100532	10968	243.061	4.272692e+003	4.272804e+002	4026	35	1.121210e+001	0	0	0	0	0	0	4060.03	1	1	46.8651	35.9444
DATA	639	8	44	0	0	A_42_P759822	NM_001109673	10993.5	243.141	5.810849e+002	5.819124e+001	608	29	8.068616e+000	0	0	0	0	0	0	550.316	1	1	44.4243	30.4444
DATA	640	8	45	0	0	A_64_P014687	NM_012650	11019.1	243.032	8.691220e+003	8.691275e+002	8224	29	5.355743e+000	0	0	0	0	0	0	8201.94	1	1	45.4864	28.7273
DATA	641	8	46	0	0	A_43_P18505	NM_001012010	11044.4	243.427	2.374958e+002	2.257469e+001	274	31	7.808313e+000	0	0	0	0	0	0	223.329	1	1	57.5363	30.9714
DATA	642	8	47	0	0	A_43_P12580	NM_031548	11069.6	243.427	1.450451e+002	1.483968e+001	200	32	7.170096e+000	0	0	0	0	0	0	135.884	1	1	57.5363	31.5938
DATA	643	8	48	0	0	A_64_P052980	NM_001014786	11095.4	243.427	1.609533e+001	3.536172e+000	76	32.5	9.056944e+000	0	0	0	0	0	0	15.0188	1	1	57.5363	32.8125
DATA	644	8	49	0	0	A_64_P397764	ENSRNOT00000028709	11120.6	242.866	5.344494e+002	5.353837e+001	567	30	6.145668e+000	0	0	0	0	0	0	496.657	1	1	45.835	30.6667
DATA	645	8	50	0	0	A_64_P048408	NM_001008858	11146	243.455	1.343728e+002	1.380717e+001	188	29	8.199073e+000	0	0	0	0	0	0	124.363	1	1	55.8519	29.5313
DATA	647	8	52	0	0	A_64_P059500	ENSRNOT00000043917	11196.7	243.5	3.214724e+000	3.209339e+000	66.5	30	7.928814e+000	0	0	0	0	0	0	1.96124	0	0	57.5363	30.4074
DATA	648	8	53	0	0	A_64_P220198	AW917371	11222.3	243.5	1.518205e+001	3.557172e+000	75.5	30	8.511134e+000	0	0	0	0	0	0	13.8659	1	0	57.5363	30.2424
DATA	649	8	54	0	0	A_64_P109764	NM_001007756	11247.4	243.483	4.191585e+002	4.204025e+001	449	29	7.178373e+000	0	0	0	0	0	0	381.068	1	1	52.9257	30.0645
DATA	650	8	55	0	0	A_64_P142685	NM_001130498	11272.9	243.5	1.871371e+001	3.747768e+000	78	33	7.520553e+000	0	0	0	0	0	0	16.9325	1	1	56.9804	32.3939
DATA	651	8	56	0	0	A_44_P395709	NM_134366	11298.4	243.64	1.205952e+003	1.206394e+002	1115	28	9.723089e+000	0	0	0	0	0	0	1085.9	1	1	48.8603	30
DATA	652	8	57	0	0	A_64_P165071	NM_001110165	11323.6	243.506	1.023507e+004	1.023512e+003	9000.5	30.5	6.194430e+000	0	0	0	0	0	0	9170.91	1	1	52.9257	30.125
DATA	653	8	58	0	0	A_64_P009147	ENSRNOT00000042587	11349	243.507	7.345530e+001	8.050911e+000	126	31	6.748219e+000	0	0	0	0	0	0	65.4875	1	1	48.5334	31.4615
DATA	654	8	59	0	0	A_42_P647072	NM_178102	11374.4	243.5	1.860301e+003	1.860596e+002	1653.5	30	1.979090e+001	0	0	0	0	0	0	1650.05	1	1	48.5334	39.2903
DATA	655	8	60	0	0	A_64_P125585	XM_001063000	11399.9	243.5	4.052003e+001	5.244597e+000	98	30	8.061191e+000	0	0	0	0	0	0	35.7535	1	1	56.9804	30.129
DATA	656	8	61	0	0	A_42_P610317	NM_001108225	11425	243.5	7.247548e+003	7.247625e+002	5995.5	29	8.692975e+000	0	0	0	0	0	0	6361.79	1	1	49.8279	29.4667
DATA	657	8	62	0	0	A_42_P755831	NM_152935	11450.4	243.64	2.207664e+004	2.207667e+003	18610	29	7.935606e+000	0	0	0	0	0	0	19276.1	1	1	48.8603	28.5769
DATA	659	8	64	0	0	A_44_P386375	NM_053842	11501.5	243.5	4.619115e+002	4.631626e+001	461	29.5	8.366359e+000	0	0	0	1	0	0	398.922	1	1	57.5363	29.5625
DATA	660	8	65	0	0	A_43_P15565	NM_023953	11526.9	243.5	8.508188e+000	3.524959e+000	70	28	7.618537e+000	0	0	0	0	0	0	7.3076	1	0	65	27.4
DATA	661	8	66	0	0	A_42_P456701	NM_001009697	11552	243.821	1.042253e+003	1.042820e+002	952	34	7.697757e+000	0	0	0	0	0	0	890.35	1	1	46.1809	31.7429
DATA	662	8	67	0	0	A_43_P20388	ENSRNOT00000061333	11577.5	243.648	1.062168e+003	1.062731e+002	923	33	6.837397e+000	0	0	0	0	0	0	902.244	1	1	47.8731	31
DATA	663	8	68	0	0	A_44_P572504	TC585660	11602.9	243.582	4.195525e+002	4.209920e+001	408	28.5	6.559821e+000	0	0	0	0	0	0	354.377	1	1	46.1809	27.5313
DATA	664	8	69	0	0	A_64_P059964	NM_001013858	11628.1	243.753	4.045471e+003	4.045623e+002	3351	29	9.020914e+000	0	0	0	0	0	0	3398.05	1	1	47.8731	30.5758
DATA	665	8	70	0	0	A_44_P1056293	ENSRNOT00000022862	11653.8	243.836	1.797339e+003	1.797683e+002	1503	28	7.300022e+000	0	0	0	0	0	0	1501.05	1	1	47.5395	29.0968
DATA	666	8	71	0	0	A_64_P133276	NM_001107464	11679.2	243.726	1.035768e+003	1.036372e+002	890	27.5	7.021805e+000	0	0	0	0	0	0	860.094	1	1	51.4001	28.2667
DATA	667	8	72	0	0	A_42_P667782	NM_001009673	11704.2	243.833	7.629116e+002	7.637408e+001	685	27	7.861578e+000	0	0	0	1	0	0	629.993	1	1	47.5395	28.0789
DATA	668	8	73	0	0	A_64_P023624	A_64_P023624	11730	243.542	2.838639e+002	2.861111e+001	294	25	8.350399e+000	0	0	0	0	0	0	233.032	1	1	48.5334	26.6667
DATA	669	8	74	0	0	A_64_P110130	NM_001106172	11755.7	243.885	5.320042e+002	5.332204e+001	492	30	6.453700e+000	0	0	0	0	0	0	434.262	1	1	49.8279	29.3103
DATA	670	8	75	0	0	A_64_P087728	XM_001078778	11780.3	243.905	1.631997e+002	1.671648e+001	192.5	31	8.026777e+000	0	0	0	0	0	0	132.481	1	1	48.8603	29.6923
DATA	671	8	76	0	0	A_44_P475356	NM_001177823	11805.8	244.185	3.266549e+002	3.286765e+001	322.5	28.5	8.369210e+000	0	0	0	0	0	0	263.679	1	1	45.835	31.3235
DATA	672	8	77	0	0	A_42_P560984	NM_001109179	11831.1	243.726	1.239420e+004	1.239426e+003	9538.5	32	8.431093e+000	0	0	0	0	0	0	9947.33	1	1	48.2044	31.4
DATA	673	8	78	0	0	A_42_P566906	NM_001006966	11856.5	243.901	3.275193e+003	3.275400e+002	2574	33	5.685484e+000	0	0	0	0	0	0	2613.9	1	1	47.8731	33.5161
DATA	674	8	79	66	1	DarkCorner	DarkCorner	11882.5	244	3.716836e+000	3.702370e+000	53	30	7.461630e+000	0	0	0	0	0	0	-9.49898	0	0	54.1152	30.25
DATA	675	8	80	66	1	DarkCorner	DarkCorner	11907.6	244.212	3.737074e+000	3.722529e+000	54.5	33	6.709284e+000	0	0	0	0	0	0	-8.60502	0	0	46.1809	32.8333
DATA	676	8	81	66	1	DarkCorner	DarkCorner	11933.4	243.931	3.758399e+000	3.743771e+000	55.5	26	6.039298e+000	0	0	0	0	0	0	-6.47248	0	0	53.8203	26.8387
DATA	677	8	82	66	1	DarkCorner	DarkCorner	11958.5	244	3.778668e+000	3.763961e+000	56	30	9.183246e+000	0	0	0	0	0	0	-5.62504	0	0	65	31.9643
DATA	678	8	83	66	1	DarkCorner	DarkCorner	11984	244	3.799212e+000	3.784425e+000	57	28	8.230549e+000	0	0	0	0	0	0	-5.05099	0	0	54.9904	30.75
DATA	679	8	84	66	1	DarkCorner	DarkCorner	12009.5	244	3.819605e+000	3.805057e+000	62	29.5	3.807887e+000	0	0	0	0	0	0	0.380257	0	0	54.1152	30.8333
DATA	680	8	85	66	1	DarkCorner	DarkCorner	12034.1	244.434	3.838603e+000	3.823663e+000	62	29.5	8.143897e+000	0	0	0	0	0	0	-1.84563	0	0	48.5334	30.3156
DATA	681	9	1	66	1	DarkCorner	DarkCorner	9889	249.545	6.272402e+000	3.284058e+000	64	25	6.380941e+000	0	0	0	0	0	0	5.71676	1	0	55.8519	25.8031
DATA	682	9	2	66	1	DarkCorner	DarkCorner	9914.38	249.803	3.217063e+000	3.204542e+000	56	28	8.301606e+000	0	0	0	0	0	0	-2.24379	0	0	49.5074	29.8
DATA	683	9	3	66	1	DarkCorner	DarkCorner	9939.61	249.732	3.199172e+000	3.186720e+000	56	25	6.709166e+000	0	0	0	0	0	0	-3.61629	0	0	47.8731	26.7097
DATA	684	9	4	66	1	DarkCorner	DarkCorner	9965.22	249.973	3.181767e+000	3.169383e+000	52	24	8.018661e+000	0	0	0	0	0	0	-6.19416	0	0	47.5395	25.0323
DATA	685	9	5	66	1	DarkCorner	DarkCorner	9990.44	249.756	3.165777e+000	3.153456e+000	54	26	1.046849e+001	0	0	0	0	0	0	-6.52358	0	0	50.4627	27.5484
DATA	686	9	6	66	1	DarkCorner	DarkCorner	10016	250.12	3.150185e+000	3.137924e+000	53	27.5	6.910678e+000	0	0	0	0	0	0	-6.09646	0	0	47.2035	28.0333
DATA	687	9	7	66	1	DarkCorner	DarkCorner	10041.5	250	3.135715e+000	3.123511e+000	52	28	5.914153e+000	0	0	0	0	0	0	-7.46356	0	0	54.1152	27.8519
DATA	688	9	8	0	0	A_44_P195306	NM_019377	10066.5	250	3.431015e+004	3.431016e+003	30947	26	7.229057e+000	0	0	0	0	0	0	32411.1	1	1	54.1152	27.5
DATA	689	9	9	0	0	A_44_P653240	NM_001202552	10092.3	249.9	8.908253e+002	8.913636e+001	864	26	7.019049e+000	0	0	0	0	0	0	845.013	1	1	47.2035	27.2727
DATA	690	9	10	0	0	A_64_P012778	ENSRNOT00000038310	10117.9	250.042	6.508006e+000	3.153186e+000	66	26	1.006776e+001	0	0	0	0	0	0	6.19739	1	0	46.8651	29.1212
DATA	691	9	11	0	0	A_43_P11430	NM_001130503	10142.6	249.972	3.024809e+002	3.040395e+001	339	28	5.584725e+000	0	0	0	0	0	0	289.048	1	1	48.2044	26.3214
DATA	692	9	12	0	0	A_44_P225353	NM_001009678	10168.6	250	4.769252e+002	4.779085e+001	507	29	8.072079e+000	0	0	0	0	0	0	457.31	1	1	49.8279	29.0385
DATA	693	9	13	0	0	A_64_P055231	NM_001106620	10193.5	250	1.200739e+003	1.201128e+002	1213.5	29	8.618624e+000	0	0	0	0	0	0	1154.86	1	1	48.5334	29.3143
DATA	694	9	14	0	0	A_42_P540950	NM_001009541	10219.4	249.931	1.549638e+003	1.549937e+002	1518.5	27	7.218715e+000	0	0	0	0	0	0	1494.76	1	1	53.8203	26.8788
DATA	695	9	15	0	0	A_64_P135888	ENSRNOT00000029916	10244.5	250	3.049879e+000	3.039790e+000	62	29	7.935401e+000	0	0	0	0	0	0	1.00627	0	0	65	29.3824
DATA	696	9	16	0	0	A_64_P086448	NM_001008819	10270	250	1.227914e+002	1.264765e+001	179	31	7.085156e+000	0	0	0	0	0	0	119.034	1	1	54.9904	29.7407
DATA	697	9	17	0	0	A_42_P701779	NM_001108048	10294.8	249.903	1.667219e+003	1.667494e+002	1575	24.5	5.924253e+000	0	0	0	0	0	0	1619.57	1	1	46.8651	25.5
DATA	698	9	18	0	0	A_44_P409965	ENSRNOT00000036078	10320.7	250.053	2.374889e+001	3.840823e+000	85	24	5.669033e+000	0	0	0	0	0	0	23.1152	1	1	49.1849	25.069
DATA	699	9	19	0	0	A_44_P474037	NM_052807	10346	250.095	1.704829e+002	1.731259e+001	224	30	9.641981e+000	0	0	0	0	0	0	166.211	1	1	46.8651	31.303
DATA	700	9	20	0	0	A_64_P156985	NM_001000385	10371.5	250	3.021002e+000	3.009244e+000	60	27	6.721883e+000	0	0	0	0	0	0	-2.26105	0	0	54.1152	27.0606
DATA	701	9	21	0	0	A_42_P635228	NM_001107651	10396.9	250.065	5.705942e+001	6.449135e+000	116	30	6.584602e+000	0	0	0	0	0	0	55.777	1	1	54.4085	30.0968
DATA	702	9	22	0	0	A_64_P240508	ENSRNOT00000018000	10422.5	250	3.603278e+002	3.615767e+001	409.5	34	1.253580e+001	0	0	0	0	0	0	352.574	1	1	54.1152	37.7097
DATA	703	9	23	0	0	A_64_P026509	NM_020656	10447.5	250	9.998504e+001	1.043899e+001	157.5	26	5.781940e+000	0	0	0	0	0	0	97.9062	1	1	65	26.6087
DATA	704	9	24	0	0	A_42_P570241	NM_177928	10473.1	250.065	2.107697e+002	2.128923e+001	267	26	8.201486e+000	0	0	0	0	0	0	206.5	1	1	54.4085	27.3333
DATA	706	9	26	0	0	A_64_P032893	TC597420	10523.5	249.901	3.293418e+004	3.293419e+003	31629	34.5	9.041936e+000	0	0	0	0	0	0	32279.8	1	1	47.8731	33.1429
DATA	707	9	27	0	0	A_64_P043605	NM_001024799	10549	249.884	4.674677e+003	4.674773e+002	4483.5	33	7.424509e+000	0	0	0	0	0	0	4581.27	1	1	46.8651	32.96
DATA	708	9	28	0	0	A_64_P095890	NM_019337	10574.4	249.735	1.151318e+004	1.151322e+003	11342	33	9.053417e+000	0	0	0	0	0	0	11279.3	1	1	46.5243	33.0333
DATA	709	9	29	0	0	A_42_P513145	NM_001107288	10599.6	250.156	4.678980e+002	4.688590e+001	501	33	8.175166e+000	0	0	0	0	0	0	458.174	1	1	49.8279	34.4
DATA	710	9	30	0	0	A_64_P122317	NM_001108031	10624.9	250.268	1.776951e+002	1.802139e+001	234	31	7.757570e+000	0	0	0	0	0	0	173.877	1	1	47.5395	32.4286
DATA	711	9	31	0	0	A_64_P065492	NM_001109101	10650.6	250.427	5.325867e+001	6.115297e+000	113.5	32	9.188957e+000	0	0	0	0	0	0	52.0662	1	1	57.5363	31.7027
DATA	712	9	32	0	0	A_64_P129273	NM_001105871	10676.4	250.427	4.048822e+001	5.044391e+000	101	33	8.417185e+000	0	0	0	0	0	0	39.5359	1	1	57.5363	31.8148
DATA	713	9	33	0	0	A_64_P050748	NM_181824	10701.6	250.427	4.484009e+001	5.402149e+000	105	34.5	7.698335e+000	0	0	0	0	0	0	43.7276	1	1	57.5363	33.3333
DATA	714	9	34	0	0	A_42_P689755	NM_053306	10727.1	250.216	8.453845e+001	8.976231e+000	136	31	7.616104e+000	0	0	0	1	0	0	82.3125	1	1	40.2912	29.6286
DATA	715	9	35	0	0	A_64_P039586	TC635481	10752.3	250.368	3.808515e+002	3.820490e+001	415.5	26	6.964937e+000	0	0	0	0	0	0	370.202	1	1	49.5074	26.2
DATA	716	9	36	0	0	A_64_P083474	NM_001134731	10777.2	250.361	5.229833e+003	5.229920e+002	5006	28	7.712028e+000	0	0	0	0	0	0	5074.15	1	1	47.8731	29.7586
DATA	718	9	38	0	0	A_42_P763553	NM_001107486	10828	250.474	1.958303e+002	1.981778e+001	247.5	32	1.071652e+001	0	0	0	0	0	0	189.182	1	1	49.1849	34.5429
DATA	719	9	39	0	0	A_44_P151513	NM_001000901	10854	250.455	6.208001e+000	3.111432e+000	66	30.5	8.126602e+000	0	0	0	0	0	0	5.98233	1	0	65	30.9583
DATA	720	9	40	0	0	A_42_P460204	ENSRNOT00000020886	10878.8	250.676	3.364372e+002	3.378228e+001	379	29	9.563392e+000	0	0	0	1	0	0	323.393	1	1	48.8603	30.5385
DATA	721	9	41	0	0	A_44_P218147	NM_001013432	10904.7	250.5	3.694573e+001	4.800579e+000	94	29	8.736049e+000	0	0	0	0	0	0	35.4126	1	1	57.5363	29.4375
DATA	722	9	42	0	0	A_42_P554722	NM_001099758	10930	250.342	9.474903e+003	9.474953e+002	8853	33	7.078316e+000	0	0	0	0	0	0	9055.02	1	1	48.8603	32.5556
DATA	723	9	43	0	0	A_44_P135450	XM_223143	10955.5	250.5	3.810203e+002	3.822662e+001	413	33	9.202968e+000	0	0	0	0	0	0	363.013	1	1	57.5363	34.1935
DATA	724	9	44	0	0	A_64_P107329	NM_001013207	10981	250.5	7.967061e+003	7.967121e+002	7344	34	8.745899e+000	0	0	0	0	0	0	7565.83	1	1	54.7002	33.2571
DATA	725	9	45	0	0	A_64_P116219	NM_001004085	11006.3	250.6	1.564885e+004	1.564888e+003	14171	32	6.283883e+000	0	0	0	0	0	0	14810.7	1	1	50.7771	31.7778
DATA	726	9	46	0	0	A_44_P147396	NM_001191744	11031.7	250.5	2.057808e+002	2.226347e+001	217.5	30	6.868268e+000	0	1	0	0	0	0	194.068	1	1	57.5363	30.0571
DATA	727	9	47	0	0	A_44_P975743	TC626448	11057.2	250.603	1.864578e+003	1.864841e+002	1732	31	8.336602e+000	0	0	0	0	0	0	1751.97	1	1	50.1463	31.9677
DATA	728	9	48	0	0	A_42_P728472	NM_001007600	11082.3	250.6	7.340728e+003	7.340795e+002	6530	33	8.133828e+000	0	0	0	0	0	0	6871.34	1	1	50.7771	33.2973
DATA	729	9	49	0	0	A_64_P130139	NM_013181	11107.4	250.342	1.018083e+004	1.018088e+003	9181	31	9.294350e+000	0	0	0	0	0	0	9492.32	1	1	48.2044	31.5806
DATA	730	9	50	0	0	A_42_P481087	XM_232226	11132.9	250.377	7.927508e+002	7.933820e+001	772	31	5.204585e+000	0	0	0	0	0	0	736.115	1	1	46.8651	31.5938
DATA	731	9	51	0	0	A_44_P102465	NM_001000424	11158.6	250.573	1.841272e+002	1.868488e+001	196	29	9.218397e+000	0	0	0	0	0	0	170.25	1	1	57.5363	30.6429
DATA	732	9	52	0	0	A_64_P082557	ENSRNOT00000029274	11184.1	250.5	1.821910e+001	3.674858e+000	80	32.5	6.941555e+000	0	0	0	0	0	0	16.7725	1	1	56.9804	32.5
DATA	733	9	53	0	0	A_64_P064873	XM_228599	11209.1	250.544	3.762172e+001	4.942534e+000	99	30	7.407059e+000	0	0	0	0	0	0	34.4835	1	1	46.8651	30.2581
DATA	734	9	54	0	0	A_64_P042298	A_64_P042298	11234.7	250.5	9.764039e+001	1.028135e+001	147	29	7.286106e+000	0	0	0	0	0	0	89.0851	1	1	65	29.0588
DATA	735	9	55	0	0	A_44_P286341	ENSRNOT00000038519	11260.2	250.699	1.020707e+001	3.392444e+000	70	30	4.790864e+000	0	0	0	0	0	0	9.26938	1	0	48.5334	30.2857
DATA	736	9	56	0	0	A_44_P994614	NM_001106646	11285.6	250.573	4.449658e+004	4.449660e+003	39448.5	32	8.801977e+000	0	0	0	0	0	0	40216	1	1	57.5363	32.4063
DATA	737	9	57	0	0	A_64_P098354	XM_001066867	11311	250.545	1.862907e+002	1.891331e+001	228.5	31	8.145536e+000	0	0	0	0	0	0	167.551	1	1	55.8519	30.2759
DATA	738	9	58	0	0	A_64_P117373	NM_001107752	11336.1	250.739	9.307884e+001	9.869745e+000	151	30.5	5.352210e+000	0	0	0	0	0	0	83.3098	1	1	46.5243	30.6154
DATA	739	9	59	0	0	A_64_P111395	ENSRNOT00000025391	11361.5	250.697	6.339210e+002	6.347789e+001	627	32	8.343832e+000	0	0	0	0	0	0	564.524	1	1	49.1849	33.0333
DATA	740	9	60	0	0	A_64_P059465	XM_229201	11387.2	250.754	4.306359e+001	5.435327e+000	99	28.5	1.176579e+001	0	0	0	0	0	0	38.1513	1	1	45.1352	31.2857
DATA	741	9	61	0	0	A_64_P010852	NM_001106214	11412.6	250.605	2.005508e+004	2.005511e+003	17045.5	29	8.746612e+000	0	0	0	0	0	0	17674.9	1	1	49.5074	30.3548
DATA	742	9	62	0	0	A_64_P024967	NM_001008359	11438	250.545	9.823675e+001	1.037961e+001	147	26	9.026246e+000	0	0	0	0	0	0	86.121	1	1	65	27.8387
DATA	743	9	63	0	0	A_44_P278418	NM_012538	11463.5	250.648	2.368688e+001	4.118603e+000	83.5	28	6.822119e+000	0	0	0	0	0	0	20.655	1	1	57.5363	28.1852
DATA	744	9	64	0	0	A_44_P821875	NM_001009500	11488.6	250.573	2.872719e+001	4.441479e+000	89	29	1.073138e+001	0	0	0	0	0	0	24.9166	1	1	57.5363	30.6552
DATA	745	9	65	0	0	A_64_P066737	A_64_P066737	11514.4	250.931	1.451226e+002	1.490657e+001	183.5	30	1.024041e+001	0	0	0	0	0	0	125.187	1	1	53.8203	30.5926
DATA	746	9	66	0	0	A_64_P003943	TC616650	11539.5	250.881	1.005792e+002	1.062493e+001	149	26	6.723688e+000	0	0	0	0	0	0	86.2911	1	1	46.1809	27.1481
DATA	747	9	67	0	0	A_64_P047035	ENSRNOT00000066263	11565	251	1.251430e+001	3.663869e+000	73	30	7.594467e+000	0	0	0	0	0	0	10.6773	1	0	54.9904	30.75
DATA	748	9	68	0	0	A_64_P113867	NM_001077201	11590.4	250.958	6.823455e+002	6.832235e+001	640	28.5	6.748789e+000	0	0	0	0	0	0	578.941	1	1	48.2044	29.1154
DATA	749	9	69	0	0	A_64_P013758	NM_012582	11615.5	251.127	6.228019e+001	7.135276e+000	114	28	7.416198e+000	0	0	0	0	0	0	52.5515	1	1	47.8731	29
DATA	750	9	70	0	0	A_44_P303982	NM_001106381	11641.4	250.836	1.340464e+002	1.385460e+001	173	32	6.852241e+000	0	0	0	0	0	0	112.452	1	1	48.5334	31.1034
DATA	751	9	71	0	0	A_64_P048601	A_64_P048601	11666.4	251.028	5.239936e+002	5.251757e+001	477.5	27	7.836021e+000	0	0	0	0	0	0	437.157	1	1	48.2044	28.125
DATA	752	9	72	0	0	A_44_P304880	NM_001014261	11692	251	8.206759e+001	8.938420e+000	128	26.5	6.251069e+000	0	0	0	0	0	0	68.0774	1	1	54.9904	26.4
DATA	753	9	73	0	0	A_64_P096767	ENSRNOT00000039549	11717.5	251	1.806497e+001	3.993950e+000	76	23	7.689148e+000	0	0	0	0	0	0	14.9003	1	1	54.1152	25.2941
DATA	754	9	74	0	0	A_43_P21810	NM_001025000	11742.5	251	2.617282e+001	3.716550e+000	76	26	7.490855e+000	0	0	0	0	0	0	21.4675	1	1	54.1152	26.375
DATA	756	9	76	0	0	A_64_P084976	NM_001008916	11793.5	251	3.637136e+000	3.622980e+000	60	28	8.973129e+000	0	0	0	0	0	0	-2.78024	0	0	54.1152	29.2727
DATA	757	9	77	0	0	A_64_P040004	XM_001054754	11818.7	251.086	3.426801e+003	3.426995e+002	2711	27.5	8.245661e+000	0	0	0	0	0	0	2763.53	1	1	49.5074	30.4063
DATA	758	9	78	0	0	A_64_P156785	XM_001058828	11843.7	250.94	3.677925e+000	3.676508e+000	65	32	8.054050e+000	0	0	0	0	0	0	2.46751	0	0	45.835	32.1429
DATA	759	9	79	0	0	A_64_P123914	XM_217505	11869.6	250.894	1.908515e+004	1.908519e+003	15242	30.5	6.718325e+000	0	0	0	0	0	0	15218.4	1	1	45.4864	31.2857
DATA	760	9	80	66	1	DarkCorner	DarkCorner	11894.5	251.247	3.718745e+000	3.704271e+000	62	29.5	6.540703e+000	0	0	0	0	0	0	-2.05963	0	0	47.8731	30.5417
DATA	761	9	81	66	1	DarkCorner	DarkCorner	11920.1	251.025	3.739690e+000	3.725135e+000	57.5	27.5	9.018754e+000	0	0	0	0	0	0	-4.80672	0	0	49.1849	30.2
DATA	762	9	82	66	1	DarkCorner	DarkCorner	11945.9	251.065	3.760397e+000	3.745762e+000	54.5	26	7.988391e+000	0	0	0	0	0	0	-8.49798	0	0	54.4085	28.5758
DATA	763	9	83	66	1	DarkCorner	DarkCorner	11971.3	251.014	3.780821e+000	3.766106e+000	54	32	8.342117e+000	0	0	0	0	0	0	-7.18581	0	0	47.2035	33.1818
DATA	764	9	84	66	1	DarkCorner	DarkCorner	11996.5	251	3.800851e+000	3.786058e+000	58	31.5	6.790739e+000	0	0	0	0	0	0	-4.08015	0	0	54.1152	30.125
DATA	765	9	85	66	1	DarkCorner	DarkCorner	12021.8	250.782	3.821072e+000	3.806200e+000	60	29.5	8.181667e+000	0	0	0	0	0	0	-2.17674	0	0	49.1849	31.5556
DATA	766	10	1	66	1	DarkCorner	DarkCorner	9902.01	256.628	3.222240e+000	3.209699e+000	56	25.5	6.582498e+000	0	0	0	0	0	0	-2.15183	0	0	48.2044	26.7045
DATA	767	10	2	66	1	DarkCorner	DarkCorner	9927.03	257.156	3.203829e+000	3.191360e+000	60	25	6.537839e+000	0	0	0	0	0	0	-0.229698	0	0	45.4864	25.92
DATA	768	10	3	66	1	DarkCorner	DarkCorner	9952.32	257.367	3.186330e+000	3.173928e+000	55	24	4.688315e+000	0	0	0	0	0	0	-3.07299	0	0	50.7771	24.8621
DATA	769	10	4	66	1	DarkCorner	DarkCorner	9977.74	257.779	3.169544e+000	3.157208e+000	50	25	9.046559e+000	0	0	0	0	0	0	-8.58827	0	0	49.8279	25.7667
DATA	770	10	5	66	1	DarkCorner	DarkCorner	10003.2	257.551	3.153997e+000	3.141722e+000	57	27	8.830524e+000	0	0	0	0	0	0	-4.0127	0	0	50.1463	28.7667
DATA	771	10	6	66	1	DarkCorner	DarkCorner	10028.7	257.727	3.139059e+000	3.126841e+000	53	27	6.036976e+000	0	0	0	0	0	0	-7.25866	0	0	49.8279	27.4848
DATA	772	10	7	0	0	A_64_P139937	XM_001070013	10054.1	257.477	3.125273e+000	3.114041e+000	60	26	6.123724e+000	0	0	0	0	0	0	0.718892	0	0	55.8519	27
DATA	773	10	8	0	0	A_44_P185613	XM_001080030	10079.4	257.427	1.301494e+002	1.337907e+001	180	28	6.021269e+000	0	0	0	0	0	0	123.345	1	1	57.5363	27.4545
DATA	774	10	9	0	0	A_42_P738520	NM_001007746	10104.7	257.5	1.123904e+003	1.124328e+002	1094.5	24	8.001724e+000	0	0	0	0	0	0	1069.34	1	1	57.5363	27.2
DATA	775	10	10	66	-1	(-)3xSLv1	NegativeControl	10130.4	257.427	3.088469e+000	3.076449e+000	58	28	8.862682e+000	0	0	0	0	0	0	-0.570535	0	0	57.5363	27.9333
DATA	776	10	11	0	0	A_42_P626023	NM_001107265	10155.6	257.333	6.901043e+002	6.907850e+001	716.5	29	5.698208e+000	0	0	0	0	0	0	661.304	1	1	47.2035	27.1071
DATA	777	10	12	0	0	A_43_P11120	XR_085824	10180.8	257.31	2.041770e+003	2.041999e+002	1930	28	8.784783e+000	0	0	0	0	0	0	1962.77	1	1	47.5395	30
DATA	778	10	13	0	0	A_42_P473425	NM_138844	10206.5	257.5	8.006123e+001	8.566360e+000	137	27	7.936497e+000	0	0	0	0	0	0	77.1969	1	1	57.5363	27.1081
DATA	779	10	14	0	0	A_44_P692981	ENSRNOT00000007422	10231.9	257.5	3.839688e+001	4.896674e+000	98	27	7.636262e+000	0	0	0	0	0	0	37.1239	1	1	43.7019	28
DATA	780	10	15	0	0	A_64_P102366	A_64_P102366	10257.3	257.775	2.800480e+001	4.126815e+000	86.5	30	7.728807e+000	0	0	0	0	0	0	27.1445	1	1	47.2035	30.0286
DATA	781	10	16	0	0	A_42_P616287	NM_001134555	10282.3	257.662	2.062037e+002	2.084100e+001	252	25	6.590337e+000	0	0	0	0	0	0	200.308	1	1	48.5334	26.1071
DATA	782	10	17	0	0	A_64_P073995	XM_001081370	10308.2	257	1.844269e+001	3.537414e+000	80	25.5	6.882011e+000	0	0	0	0	0	0	17.9505	1	1	46.8651	25.5
DATA	783	10	18	0	0	A_42_P595381	NM_001107258	10333.5	257.5	3.020394e+003	3.020544e+002	2871	28.5	6.266987e+000	0	0	0	0	0	0	2945.17	1	1	57.5363	27.3571
DATA	784	10	19	0	0	A_42_P462205	NM_001007745	10358.5	257.427	5.556329e+003	5.556411e+002	5146.5	29.5	6.705290e+000	0	0	0	0	0	0	5426.12	1	1	49.1849	28.7333
DATA	785	10	20	0	0	A_64_P016102	A_64_P016102	10384.3	257.5	2.305675e+001	3.787235e+000	83	28	6.011961e+000	0	0	0	0	0	0	22.5467	1	1	65	28.1667
DATA	786	10	21	0	0	A_64_P017829	NM_001128216	10409.5	257.5	3.012997e+000	3.001400e+000	61.5	31.5	8.925026e+000	0	0	0	0	0	0	0.273446	0	0	57.5363	33.7857
DATA	787	10	22	0	0	A_64_P090244	NM_001127449	10435	257.545	1.360887e+005	1.360887e+004	133744	32	1.450739e+001	0	0	0	0	0	0	133338	1	1	55.8519	36.8667
DATA	788	10	23	0	0	A_42_P503626	NM_001044247	10460.6	257.911	4.866960e+001	5.715495e+000	106	26	6.744418e+000	0	0	0	0	0	0	47.7185	1	1	50.1463	25.7778
DATA	789	10	24	0	0	A_64_P144850	ENSRNOT00000002335	10485.4	257.556	6.157789e+001	6.847725e+000	121.5	25	6.478460e+000	0	0	0	0	0	0	60.3968	1	1	48.2044	25.4483
DATA	790	10	25	0	0	A_42_P703023	NM_145776	10511.3	257.5	3.695555e+002	3.707670e+001	424	30	8.642033e+000	0	0	0	0	0	0	362.541	1	1	57.5363	29.5517
DATA	791	10	26	0	0	A_64_P153581	NM_001109367	10536.5	257.5	6.317553e+001	6.991493e+000	122	32	7.442446e+000	0	0	0	0	0	0	61.9758	1	1	57.5363	32.84
DATA	792	10	27	0	0	A_44_P156782	NM_001013879	10561.5	257.333	1.158302e+003	1.158690e+002	1198	30.5	8.444273e+000	0	0	0	0	0	0	1136.04	1	1	49.1849	31.0667
DATA	793	10	28	0	0	A_43_P12841	NM_053535	10587.4	257.573	2.141115e+002	2.161986e+001	269.5	33	9.605033e+000	0	0	0	0	0	0	209.911	1	1	57.5363	35.44
DATA	794	10	29	0	0	A_64_P097715	NM_001135710	10612.5	257.759	1.448862e+002	1.479568e+001	202	28.5	6.599846e+000	0	0	0	0	0	0	141.958	1	1	50.7771	29.4167
DATA	795	10	30	0	0	A_42_P769597	NM_001106230	10637.8	257.74	9.786608e+002	9.791209e+001	1000.5	32	8.353352e+000	0	0	0	1	0	0	958.086	1	1	48.5334	31.3871
DATA	796	10	31	0	0	A_42_P561835	ENSRNOT00000043937	10662.9	257.887	2.713422e+002	2.730002e+001	322	31	7.998164e+000	0	0	0	0	0	0	265.372	1	1	46.8651	30.5278
DATA	797	10	32	0	0	A_42_P604399	NM_012941	10688.4	258	1.459028e+004	1.459031e+003	13780.5	36	7.552281e+000	0	0	0	1	0	0	14251.9	1	1	45.4864	34.4138
DATA	798	10	33	0	0	A_42_P744495	NM_017125	10713.9	257.732	1.996209e+003	1.996436e+002	1913	35.5	7.339986e+000	0	0	0	0	0	0	1947.07	1	1	47.5395	34.3056
DATA	799	10	34	0	0	A_64_P047391	A_64_P047391	10739.7	257.761	4.981525e+002	4.990654e+001	550.5	26	7.327154e+000	0	0	0	0	0	0	485.098	1	1	46.1809	27.4828
DATA	800	10	35	0	0	A_44_P856007	NM_001108489	10765.1	257.614	2.684231e+002	2.701195e+001	314	27	8.356715e+000	0	0	0	0	0	0	260.915	1	1	57.259	29.1875
DATA	801	10	36	0	0	A_64_P057562	ENSRNOT00000031129	10790.1	257.87	6.296501e+002	6.303780e+001	666	29	7.671647e+000	0	0	0	0	0	0	610.867	1	1	46.8651	30.3333
DATA	802	10	37	0	0	A_64_P102395	ENSRNOT00000029656	10815.6	257.907	1.933696e+002	1.957368e+001	250.5	29.5	8.573214e+000	0	0	0	0	0	0	187.197	1	1	49.1849	31.5
DATA	803	10	38	0	0	A_64_P132318	NM_133296	10841.5	258	2.386072e+002	2.405386e+001	292.5	29	8.088365e+000	0	0	0	0	0	0	230.444	1	1	54.1152	30.037
DATA	805	10	40	0	0	A_64_P158848	NM_001130540	10892.1	257.884	1.283902e+003	1.284266e+002	1295	27	8.598602e+000	0	0	0	0	0	0	1233.58	1	1	46.8651	27.3103
DATA	806	10	41	0	0	A_64_P302888	NM_001135015	10917.6	258.3	1.650083e+002	1.678333e+001	204.5	26	6.053183e+000	0	0	0	0	0	0	158.099	1	1	40.2912	27.7778
DATA	807	10	42	0	0	A_42_P604331	NM_001108533	10942.6	257.931	9.916810e+004	9.916810e+003	93948	35	1.156691e+001	0	0	0	0	0	0	94730.5	1	1	53.8203	35.72
DATA	808	10	43	0	0	A_64_P166406	NM_019152	10967.9	257.969	7.230208e+002	7.236788e+001	729	35	1.224354e+001	0	0	0	0	0	0	688.503	1	1	45.835	36.5143
DATA	809	10	44	0	0	A_64_P123660	NM_001031655	10993.3	257.905	1.576213e+003	1.576517e+002	1492.5	31	9.526491e+000	0	0	0	0	0	0	1496.01	1	1	48.8603	32.2667
DATA	810	10	45	0	0	A_42_P668800	NM_001127553	11018.5	257.919	1.402195e+003	1.402539e+002	1347	31	5.686625e+000	0	0	0	0	0	0	1326.3	1	1	48.5334	31.2813
DATA	811	10	46	0	0	A_64_P090458	NM_001109516	11044.5	258	7.336994e+000	3.202766e+000	68	31	7.700108e+000	0	0	0	0	0	0	6.91442	1	0	54.1152	32.6667
DATA	812	10	47	0	0	A_42_P635396	NM_001109506	11069.4	258.027	2.139531e+003	2.139760e+002	2029	33	7.965154e+000	0	0	0	0	0	0	2008.93	1	1	48.5334	32.9333
DATA	813	10	48	0	0	A_64_P002989	NM_031604	11095.5	258	9.265280e+004	9.265280e+003	86548	32	8.978137e+000	0	0	0	0	0	0	86651.7	1	1	54.1152	32.3824
DATA	814	10	49	0	0	A_44_P914346	DV717012	11120.5	258.023	1.981413e+003	1.981664e+002	1915	30.5	5.542314e+000	0	0	0	0	0	0	1845.79	1	1	49.8279	30.8
DATA	815	10	50	0	0	A_44_P791176	NM_001130577	11146	258	2.406587e+001	3.977651e+000	82	30	5.071272e+000	0	0	0	0	0	0	22.3258	1	1	54.9904	29.9697
DATA	816	10	51	0	0	A_64_P011894	NM_001004210	11171.3	258	2.972078e+004	2.972080e+003	27113	30	8.375789e+000	0	0	0	0	0	0	27455.2	1	1	49.1849	32.0769
DATA	817	10	52	0	0	A_42_P717654	XM_001063683	11196.4	258	5.177390e+003	5.177488e+002	4558	30	7.791662e+000	0	0	0	0	0	0	4762.16	1	1	48.5334	30.28
DATA	818	10	53	0	0	A_64_P006102	NM_001100784	11221.6	258.014	3.269958e+002	3.285660e+001	350	32	9.008171e+000	0	0	0	0	0	0	299.435	1	1	48.2044	32.7297
DATA	819	10	54	0	0	A_64_P116038	NM_001000335	11247.3	257.958	7.980843e+000	3.320751e+000	70	29	5.568217e+000	0	0	0	0	0	0	7.27426	1	0	47.2035	29.2286
DATA	820	10	55	0	0	A_42_P581567	NM_001011899	11272.9	258.065	1.555645e+002	1.588999e+001	198	30	5.609448e+000	0	0	0	0	0	0	141.125	1	1	65	30.1818
DATA	821	10	56	0	0	A_42_P671206	FQ231880	11297.7	258.147	1.513041e+003	1.513390e+002	1390	31	9.246979e+000	0	0	0	0	0	0	1366.22	1	1	45.835	30.8929
DATA	823	10	58	0	0	A_64_P078205	NM_001044255	11348.6	257.71	6.248422e+003	6.248508e+002	5499	32.5	7.125482e+000	0	0	0	0	0	0	5586.24	1	1	46.8651	32.4286
DATA	824	10	59	66	-1	(-)3xSLv1	NegativeControl	11374.4	257.897	3.538434e+001	4.840597e+000	95	28	8.924561e+000	0	0	0	1	0	0	31.4731	1	1	46.8651	31.1724
DATA	825	10	60	0	0	A_44_P259051	NM_001037658	11399.9	258.386	4.623635e+002	4.635539e+001	475	27.5	8.133395e+000	0	0	0	0	0	0	409.183	1	1	57.259	29.8214
DATA	826	10	61	0	0	A_64_P325262	A_64_P325262	11425.4	258.427	3.562022e+001	4.881117e+000	94	29.5	9.464226e+000	0	0	0	0	0	0	31.3591	1	1	57.5363	32.0938
DATA	827	10	62	0	0	A_64_P140005	NM_001191804	11450.7	258.063	3.205907e+001	4.640504e+000	91	28.5	7.500538e+000	0	0	0	0	0	0	28.0742	1	1	49.8279	28
DATA	828	10	63	0	0	A_42_P588606	NM_001134544	11476.1	257.779	2.292930e+002	2.317609e+001	263	26	6.611025e+000	0	0	0	0	0	0	199.713	1	1	46.5243	27.3125
DATA	829	10	64	0	0	A_42_P788541	NM_001106794	11501.3	258.1	4.701566e+003	4.701688e+002	4208	30	8.720513e+000	0	0	0	1	0	0	4073.44	1	1	47.2035	30.1212
DATA	830	10	65	0	0	A_44_P1050200	NM_001108000	11526.5	258.278	1.607058e+003	1.607419e+002	1433	34	7.629514e+000	0	0	0	0	0	0	1384.92	1	1	48.2044	29.8696
DATA	831	10	66	0	0	A_42_P777935	ENSRNOT00000027369	11552.2	257.952	2.722488e+002	2.743991e+001	292	25	7.471290e+000	0	0	0	0	0	0	233.3	1	1	45.4864	26.9429
DATA	832	10	67	0	0	A_44_P349475	NM_031333	11577.5	258.13	7.990921e+002	7.998353e+001	739	31	7.204248e+000	0	0	0	0	0	0	681.036	1	1	47.2035	30.913
DATA	833	10	68	0	0	A_64_P136188	XM_001059617	11602.5	258.225	7.180573e+002	7.188934e+001	662.5	28	9.373091e+000	0	0	0	0	0	0	608.652	1	1	47.5395	30.375
DATA	834	10	69	0	0	A_64_P023386	NM_001106232	11628.5	258.5	5.037042e+004	5.037044e+003	42004	31.5	7.279833e+000	0	0	0	0	0	0	42454.8	1	1	57.5363	30.8125
DATA	835	10	70	0	0	A_64_P048576	NM_001000163	11653.4	258.676	6.107436e+001	7.041685e+000	114	27	7.406754e+000	0	0	0	0	0	0	51.1961	1	1	48.2044	28.88
DATA	836	10	71	1028	1	(+)E1A_r60_a20	E1A_r60_a20	11679.4	258.427	3.221598e+001	4.775661e+000	87.5	28	6.673813e+000	0	0	0	0	0	0	26.8487	1	1	57.5363	27.8387
DATA	837	10	72	0	0	A_64_P078510	XM_001053102	11704.3	258.413	6.526742e+002	6.536362e+001	601.5	26	5.912444e+000	0	0	0	0	0	0	540.943	1	1	44.4243	26.0968
DATA	838	10	73	0	0	A_64_P101533	A_64_P101533	11730.4	258.383	1.628455e+001	3.919836e+000	75	25	9.140462e+000	0	0	0	0	0	0	13.4185	1	0	39.4933	26.2973
DATA	839	10	74	0	0	A_64_P164601	ENSRNOT00000050537	11755.8	258.169	7.786303e+001	8.572354e+000	125	30	7.050230e+000	0	0	0	0	0	0	63.7954	1	1	45.4864	28.5333
DATA	840	10	75	0	0	A_42_P694928	NM_001109046	11780.6	258.356	2.509002e+002	2.534775e+001	266	32	8.589691e+000	0	0	0	0	0	0	204.455	1	1	48.5334	30.129
DATA	841	10	76	0	0	A_42_P510565	ENSRNOT00000046259	11806	258.352	1.292564e+003	1.293072e+002	1100	29	5.848888e+000	0	0	0	0	0	0	1047.4	1	1	47.5395	29.1304
DATA	842	10	77	0	0	A_64_P050877	XM_001081816	11831.3	258.671	2.015827e+001	4.165870e+000	81	29.5	7.541788e+000	0	0	0	0	0	0	16.2455	1	1	48.2044	30.5833
DATA	843	10	78	0	0	A_44_P281352	NM_001013076	11857.1	258.5	2.886273e+002	2.909468e+001	294	34.5	6.652545e+000	0	0	0	0	0	0	231.281	1	1	56.9804	33.9722
DATA	844	10	79	0	0	A_44_P269675	ENSRNOT00000031839	11882.6	258.392	3.083124e+002	3.105091e+001	299	30	5.591588e+000	0	0	0	0	0	0	245.682	1	1	49.1849	30.6136
DATA	845	10	80	66	1	DarkCorner	DarkCorner	11907.5	258.677	3.721081e+000	3.706598e+000	53	29	7.342281e+000	0	0	0	0	0	0	-10.4675	0	0	52.9257	30
DATA	846	10	81	66	1	DarkCorner	DarkCorner	11932.8	258	3.742074e+000	3.727510e+000	56	26.5	7.871992e+000	0	0	0	0	0	0	-5.26886	0	0	46.8651	28.5556
DATA	847	10	82	66	1	DarkCorner	DarkCorner	11958.5	258.5	3.761951e+000	3.747310e+000	57.5	31	9.445121e+000	0	0	0	0	0	0	-5.34629	0	0	57.5363	33.1071
DATA	848	10	83	66	1	DarkCorner	DarkCorner	11984	258.545	3.782054e+000	3.767334e+000	57	31.5	6.589438e+000	0	0	0	0	0	0	-7.38382	0	0	55.8519	31.4
DATA	849	10	84	66	1	DarkCorner	DarkCorner	12009.5	258.383	3.802231e+000	3.787433e+000	57.5	29	7.370647e+000	0	0	0	0	0	0	-4.32417	0	0	51.4001	30.4667
DATA	850	10	85	66	1	DarkCorner	DarkCorner	12034.6	258.573	4.583990e+000	3.834134e+000	64	30	7.685306e+000	0	0	0	1	0	0	3.53802	1	0	57.5363	30.4392
DATA	851	11	1	66	1	DarkCorner	DarkCorner	9889	264.455	3.227441e+000	3.220969e+000	60	25	6.770224e+000	0	0	0	0	0	0	1.80918	0	0	55.8519	25.9164
DATA	852	11	2	66	1	DarkCorner	DarkCorner	9914.45	264.3	3.208774e+000	3.196285e+000	56	28	6.796660e+000	0	0	0	0	0	0	-2.62857	0	0	42.9674	28.1379
DATA	853	11	3	66	1	DarkCorner	DarkCorner	9939.57	264.532	3.191045e+000	3.178625e+000	53	25	6.139903e+000	0	0	0	0	0	0	-4.88313	0	0	49.8279	26.0714
DATA	854	11	4	66	1	DarkCorner	DarkCorner	9965.38	264.718	3.173794e+000	3.161441e+000	52	22	7.172677e+000	0	0	0	0	0	0	-6.94466	0	0	47.8731	24.2963
DATA	855	11	5	66	1	DarkCorner	DarkCorner	9990.55	264.671	3.157983e+000	3.145692e+000	53.5	24.5	8.945046e+000	0	0	0	0	0	0	-5.86492	0	0	48.5334	26.4231
DATA	856	11	6	66	1	DarkCorner	DarkCorner	10016.3	264.44	3.142774e+000	3.130542e+000	51	27	6.836582e+000	0	0	0	0	0	0	-7.17868	0	0	49.1849	29.5588
DATA	857	11	7	0	0	A_64_P077381	A_64_P077381	10041.3	264.642	1.967436e+001	3.685533e+000	76.5	28	7.049479e+000	0	0	0	0	0	0	18.5479	1	1	45.835	28.1852
DATA	858	11	8	0	0	A_64_P085926	NM_030860	10066.6	264.973	1.422542e+003	1.422881e+002	1370	27.5	5.141902e+000	0	0	0	0	0	0	1346.9	1	1	48.5334	26.9286
DATA	859	11	9	0	0	A_42_P598560	NM_001033693	10092.3	264.569	1.078445e+003	1.078888e+002	1078	28	6.007091e+000	0	0	0	0	0	0	1025.23	1	1	48.5334	28.2083
DATA	860	11	10	0	1	ETG08_142674	ETG08_142674	10117.5	264.5	6.877848e+000	3.154845e+000	66	25	8.872131e+000	0	0	0	0	0	0	6.56305	1	0	57.5363	26.7027
DATA	861	11	11	0	0	A_42_P724142	NM_001106340	10143	264.609	1.339520e+003	1.339871e+002	1358	30	5.102650e+000	0	0	0	0	0	0	1282.79	1	1	46.8651	29.963
DATA	862	11	12	0	0	A_64_P054193	NM_001014193	10168.4	264.573	3.440713e+004	3.440714e+003	32415	26	6.892504e+000	0	0	0	0	0	0	33059.1	1	1	57.5363	26.6071
DATA	863	11	13	0	0	A_42_P750554	NM_001107846	10193.6	265.232	1.073119e+003	1.073552e+002	1051.5	27	8.412953e+000	0	0	0	0	0	0	1034.3	1	1	46.8651	28.5
DATA	864	11	14	0	0	A_44_P285547	NM_053393	10218.8	265.087	9.357022e+001	9.838415e+000	149.5	27	6.874261e+000	0	0	0	0	0	0	90.437	1	1	46.8651	27.4571
DATA	865	11	15	0	0	A_42_P623374	NM_138845	10244.1	265.273	1.735828e+003	1.736093e+002	1701	28.5	7.390416e+000	0	0	0	0	0	0	1682.07	1	1	45.835	29.3056
DATA	866	11	16	0	0	A_64_P064888	NM_001127303	10269.9	264.5	2.299052e+002	2.318868e+001	282.5	27	8.009228e+000	0	0	0	0	0	0	223.294	1	1	56.9804	28.0909
DATA	867	11	17	0	0	A_44_P522406	NM_001001103	10295.6	264.699	3.031868e+001	4.278266e+000	91	24	7.495662e+000	0	0	0	0	0	0	29.5105	1	1	48.5334	25.4194
DATA	868	11	18	0	0	A_42_P660129	NM_130422	10320.6	264.573	3.010162e+001	4.259007e+000	89	29	8.198732e+000	0	0	0	0	0	0	29.3529	1	1	57.5363	29.1724
DATA	869	11	19	0	0	A_64_P035679	A_64_P035679	10346.1	264.523	5.449395e+004	5.449396e+003	52752	29	6.399119e+000	0	0	0	0	0	0	53226	1	1	55.8519	27.5556
DATA	870	11	20	0	0	A_64_P118862	NM_001191999	10371.2	264.972	6.759241e+001	7.396564e+000	127	29	8.763438e+000	0	0	0	0	0	0	66.1162	1	1	46.8651	28.7419
DATA	871	11	21	0	0	A_42_P638181	NM_133395	10396.7	265.029	6.805444e+003	6.805510e+002	6509	28	5.565331e+000	0	0	0	0	0	0	6664.84	1	1	46.1809	28.5172
DATA	872	11	22	0	0	A_44_P423803	NM_031144	10422.3	264.917	2.059393e+004	2.059395e+003	20016	30	8.094639e+000	0	0	0	0	0	0	20187.8	1	1	47.8731	32.6563
DATA	874	11	24	0	0	A_44_P445195	NM_133300	10472.7	265.167	1.774380e+003	1.774632e+002	1787	25	6.621456e+000	0	0	0	0	0	0	1741.64	1	1	45.835	25.8667
DATA	875	11	25	0	0	A_42_P563276	NM_013093	10498.4	265.015	1.127793e+002	1.166816e+001	168.5	25.5	5.872184e+000	0	0	0	0	0	0	110.731	1	1	46.1809	26.4444
DATA	876	11	26	0	0	A_42_P535608	NM_001107160	10523.8	264.581	1.575096e+002	1.603266e+001	219.5	30.5	8.910787e+000	0	0	0	0	0	0	154.656	1	1	44.0646	31.0714
DATA	877	11	27	0	0	A_44_P233080	ENSRNOT00000026303	10549.4	264.829	7.883665e+003	7.883722e+002	7659	32	7.575285e+000	0	0	0	0	0	0	7740.18	1	1	49.8279	30.5806
DATA	878	11	28	0	0	A_43_P13320	NM_138880	10574.6	264.894	8.297315e+000	3.106310e+000	68	28.5	9.646107e+000	0	0	0	0	0	0	8.14374	1	0	45.4864	31.2813
DATA	879	11	29	0	0	A_42_P548007	NM_001135020	10599.7	265.027	1.105565e+004	1.105569e+003	10517	28	8.066096e+000	0	0	0	0	0	0	10845.5	1	1	48.2044	28.8095
DATA	880	11	30	0	0	A_44_P282853	NM_031983	10625.3	265.014	2.733743e+003	2.733907e+002	2691	29	7.537823e+000	0	0	0	0	0	0	2679.81	1	1	47.2035	30.1786
DATA	881	11	31	0	0	A_42_P552341	NM_053519	10650.8	265.194	1.073338e+003	1.073757e+002	1082.5	30	7.773074e+000	0	0	0	0	0	0	1051.21	1	1	47.5395	31.0588
DATA	882	11	32	0	0	A_64_P031476	NM_001107172	10676.3	265.015	1.730065e+002	1.755940e+001	229	31	8.835291e+000	0	0	0	0	0	0	169.244	1	1	46.1809	30.9355
DATA	883	11	33	0	0	A_42_P620762	NM_024403	10701.7	264.909	1.701096e+004	1.701099e+003	16587.5	34	8.038035e+000	0	0	0	0	0	0	16618.8	1	1	49.1849	33.12
DATA	884	11	34	0	0	A_64_P135370	A_64_P135370	10726.7	264.9	4.317685e+002	4.328177e+001	477.5	31	7.964885e+000	0	0	0	0	0	0	421.188	1	1	47.2035	31.2424
DATA	885	11	35	0	0	A_42_P576202	NM_001108583	10752.2	265	1.121440e+003	1.121846e+002	1098	26	5.678570e+000	0	0	0	0	0	0	1092.12	1	1	46.8651	26.6154
DATA	886	11	36	0	0	A_64_P022879	NM_001109019	10777.5	265	2.702933e+001	4.054854e+000	87	29.5	8.438827e+000	0	0	0	0	0	0	26.2733	1	1	54.1152	31.4
DATA	887	11	37	0	0	A_42_P711589	NM_022948	10802.7	265.1	7.447960e+003	7.448021e+002	7042.5	29	6.772451e+000	0	0	0	0	0	0	7224.98	1	1	47.2035	32.4074
DATA	888	11	38	0	0	A_64_P007244	A_64_P007244	10828.7	265.1	8.043883e+003	8.043940e+002	7810	30	8.890856e+000	0	0	0	0	0	0	7785.23	1	1	47.2035	32.2258
DATA	889	11	39	0	0	A_42_P477625	NM_001108719	10853.4	264.986	4.223611e+003	4.223721e+002	4084	27	6.030347e+000	0	0	0	0	0	0	4078.2	1	1	47.2035	28.0714
DATA	890	11	40	0	0	A_64_P153091	XM_341223	10879.5	265.2	8.842813e+002	8.848074e+001	870.5	27.5	8.034234e+000	0	0	0	0	0	0	851.602	1	1	47.2035	28.125
DATA	891	11	41	0	0	A_64_P016347	NM_130819	10904.5	265	1.730317e+002	1.757151e+001	202	24	5.527553e+000	0	0	0	0	0	0	166.184	1	1	54.1152	23.9231
DATA	892	11	42	0	0	A_42_P495598	NM_001014026	10930.4	265.069	1.441541e+002	1.473830e+001	202	33	7.333874e+000	0	0	0	1	0	0	138.041	1	1	53.8203	31.5
DATA	893	11	43	0	0	A_42_P759043	NM_001134509	10955.2	265.116	9.230829e+002	9.235957e+001	909.5	35	1.267752e+001	0	0	0	0	0	0	881.304	1	1	46.5243	35.8571
DATA	894	11	44	0	0	A_64_P071595	XM_002728361	10980.9	265.065	1.753389e+001	3.550507e+000	70.5	34	7.533341e+000	0	0	0	0	0	0	16.6859	1	1	54.4085	32.5862
DATA	895	11	45	0	0	A_42_P780882	NM_001008511	11006.2	265.103	7.997890e+003	7.997950e+002	7559.5	30	7.033489e+000	0	0	0	0	0	0	7585.73	1	1	46.5243	30.5946
DATA	896	11	46	0	0	A_64_P044420	NM_001134983	11031.6	265.36	8.829939e+001	9.361110e+000	146	32	6.902322e+000	0	0	0	0	0	0	83.4582	1	1	48.8603	32.2727
DATA	897	11	47	0	0	A_64_P000596	NM_001025732	11056.9	265.481	3.798081e+003	3.798209e+002	3611	32	8.214953e+000	0	0	0	0	0	0	3576.88	1	1	49.5074	32.3214
DATA	898	11	48	0	0	A_44_P468873	ENSRNOT00000015693	11082.5	265.352	2.312612e+001	3.893030e+000	85	32.5	8.511079e+000	0	0	0	0	0	0	21.6961	1	1	57.5363	32.15
DATA	900	11	50	0	0	A_42_P727022	NM_001107076	11133.2	265.164	1.037774e+004	1.037779e+003	9552	30	4.597786e+000	0	0	0	0	0	0	9658.73	1	1	47.5395	30.8378
DATA	901	11	51	0	0	A_64_P135604	NM_001009641	11158.6	265.192	3.173741e+003	3.173899e+002	2981	31	7.241547e+000	0	0	0	0	0	0	2941.56	1	1	48.2044	33.24
DATA	902	11	52	0	0	A_42_P813939	NM_001108741	11184	265.455	2.405903e+003	2.406114e+002	2179.5	32	7.049986e+000	0	0	0	0	0	0	2220.44	1	1	55.8519	32.2333
DATA	903	11	53	0	0	A_64_P052494	A_64_P052494	11209.4	265.427	5.896148e+000	3.251408e+000	69	30	7.858372e+000	0	0	0	0	0	0	5.4177	1	0	65	30.0588
DATA	904	11	54	0	0	A_44_P323678	NM_001107651	11234.7	265.5	1.369524e+001	3.491626e+000	74.5	31	5.176094e+000	0	0	0	0	0	0	12.5278	1	0	65	30.3667
DATA	905	11	55	0	0	A_44_P435764	NM_001191810	11260.4	265.427	1.106721e+001	3.411446e+000	72.5	29	3.990756e+000	0	0	0	0	0	0	10.0764	1	0	65	28.6364
DATA	906	11	56	0	0	A_42_P688320	NM_001108569	11286	265.589	2.285345e+002	2.308229e+001	267	30	7.048667e+000	0	0	0	0	0	0	207.095	1	1	48.5334	31.0606
DATA	907	11	57	0	0	A_42_P798500	NM_001014023	11310.6	265.237	3.921848e+002	3.935353e+001	408.5	31.5	8.322082e+000	0	0	0	0	0	0	353.715	1	1	49.1849	32.0313
DATA	908	11	58	0	0	A_44_P279083	NM_133401	11336.5	265.5	4.274597e+002	4.287114e+001	439	31	6.100457e+000	0	0	0	0	0	0	383.628	1	1	57.5363	31.5417
DATA	909	11	59	0	0	A_64_P129850	NM_001002855	11361.7	265.5	4.554093e+001	5.618136e+000	103	33	7.609140e+000	0	0	0	0	0	0	40.6698	1	1	57.5363	32.5517
DATA	910	11	60	0	0	A_64_P029468	NM_001105784	11387.4	265.427	4.935369e+001	5.940843e+000	106.5	27	5.143398e+000	0	0	0	0	0	0	43.8483	1	1	57.5363	27
DATA	911	11	61	0	0	A_43_P18571	NM_001013965	11412.6	265.48	3.686856e+002	3.701808e+001	373	29	9.556847e+000	0	0	0	0	0	0	325.9	1	1	49.1849	32.6
DATA	912	11	62	0	1	ERCC-00104_60	ERCC-00104_60	11437.7	265.667	3.412815e+001	4.775806e+000	93	26	5.951202e+000	0	0	0	1	0	0	30.0136	1	1	48.8603	26.6286
DATA	913	11	63	0	0	A_44_P653701	NM_001106536	11463.4	265.87	1.703523e+002	1.736314e+001	210.5	30	7.324726e+000	0	0	0	0	0	0	149.024	1	1	46.8651	28.5806
DATA	914	11	64	0	0	A_64_P093593	NM_001107077	11488.5	265.614	3.141333e+002	3.159427e+001	337.5	28	7.771362e+000	0	0	0	0	0	0	273.341	1	1	47.5395	29.641
DATA	915	11	65	0	0	A_44_P1034793	NM_001008300	11514.3	265.5	8.244903e+002	8.251890e+001	777	32	1.018420e+001	0	0	0	0	0	0	713.495	1	1	57.5363	33.5556
DATA	916	11	66	0	0	A_42_P768355	NM_057130	11539.2	265.493	9.984037e+002	9.989869e+001	905.5	26	7.601919e+000	0	0	0	0	0	0	859.415	1	1	47.8731	27.5926
DATA	917	11	67	0	0	A_44_P714581	NM_001107480	11564.6	265.427	6.767278e+003	6.767365e+002	5719.5	26	7.193278e+000	0	0	0	0	0	0	5793.24	1	1	52.9257	27.9189
DATA	918	11	68	0	0	A_64_P084521	NM_019351	11590	265.5	6.787929e+003	6.788016e+002	5755	30	8.572611e+000	0	0	0	0	0	0	5779.13	1	1	48.5334	31.4
DATA	919	11	69	0	0	A_42_P562625	NM_131913	11615.8	265.628	2.035660e+003	2.035956e+002	1744	33	8.143116e+000	0	0	0	0	0	0	1723.46	1	1	50.4627	31.8966
DATA	920	11	70	0	0	A_42_P468662	NM_001108886	11640.6	265.705	1.483158e+003	1.483569e+002	1231	30	7.452740e+000	0	0	0	1	0	0	1248.9	1	1	50.4627	28.72
DATA	921	11	71	0	0	A_42_P778587	NM_001135767	11666.5	265.5	2.149621e+002	2.178076e+001	241	29	6.635377e+000	0	0	0	0	0	0	179.974	1	1	57.5363	29.3125
DATA	922	11	72	0	0	A_64_P139957	NM_001008525	11691.9	265.722	1.678032e+004	1.678036e+003	13791.5	28.5	8.152969e+000	0	0	0	0	0	0	13971.6	1	1	47.8731	29.7857
DATA	923	11	73	0	0	A_44_P318402	NM_001000187	11717.4	265.573	1.081608e+002	1.138338e+001	148	27	8.385029e+000	0	0	0	0	0	0	89.547	1	1	57.5363	27.3939
DATA	924	11	74	0	0	A_64_P090359	NM_001033565	11742.6	265.573	4.539624e+001	5.774294e+000	98.5	23	7.163803e+000	0	0	0	0	0	0	37.3758	1	1	57.5363	24.5152
DATA	925	11	75	0	0	A_43_P17778	NM_001134991	11767.9	265.97	4.442012e+001	5.710143e+000	96	28	6.995318e+000	0	0	0	0	0	0	36.3727	1	1	46.8651	27.3704
DATA	926	11	76	0	0	A_64_P093176	A_64_P093176	11793.6	265.573	5.300593e+001	6.412465e+000	106.5	29.5	8.645075e+000	0	0	0	0	0	0	43.1538	1	1	57.5363	29.9583
DATA	927	11	77	0	0	A_64_P100123	NM_182821	11818.6	265.74	4.455597e+003	4.455744e+002	3553	32	8.142679e+000	0	0	0	0	0	0	3607.81	1	1	49.5074	31.3548
DATA	928	11	78	0	0	A_44_P426660	NM_001135717	11844.4	265.573	8.989497e+000	3.758226e+000	70	29	8.690708e+000	0	0	0	0	0	0	7.23775	1	0	57.5363	31.1818
DATA	929	11	79	0	0	A_42_P696084	NM_031022	11868.2	266.173	1.629049e+003	1.629462e+002	1594	30	6.362374e+000	0	1	0	1	0	0	1305.08	1	1	40.6843	31.5556
DATA	930	11	80	66	1	DarkCorner	DarkCorner	11895.1	265.593	3.703751e+000	3.689335e+000	53	29	5.882201e+000	0	0	0	0	0	0	-8.80904	0	0	56.9804	29.3158
DATA	931	11	81	66	1	DarkCorner	DarkCorner	11920.5	265.648	3.723807e+000	3.709314e+000	54.5	28	7.745750e+000	0	0	0	0	0	0	-7.45434	0	0	57.5363	29.6571
DATA	932	11	82	66	1	DarkCorner	DarkCorner	11946.3	265.424	3.744455e+000	3.729881e+000	52	30	8.951503e+000	0	0	0	0	0	0	-10.8617	0	0	52.0157	30.4
DATA	933	11	83	66	1	DarkCorner	DarkCorner	11970.9	266.118	3.762977e+000	3.748331e+000	54	32.5	7.190805e+000	0	0	0	0	0	0	-7.7327	0	0	51.7088	34.1786
DATA	934	11	84	66	1	DarkCorner	DarkCorner	11996.7	265.93	3.783320e+000	3.768595e+000	58.5	32	7.991868e+000	0	0	0	0	0	0	-5.17485	0	0	47.2035	31.5313
DATA	935	11	85	66	1	DarkCorner	DarkCorner	12022.6	266.051	3.803170e+000	3.788368e+000	61	31	7.377109e+000	0	0	0	0	0	0	-1.88886	0	0	49.1849	33.0217
DATA	936	12	1	66	1	DarkCorner	DarkCorner	9901.5	272	3.213796e+000	3.216099e+000	60.5	25	5.176123e+000	0	0	0	0	0	0	2.82942	0	0	54.1152	25.94
DATA	937	12	2	66	1	DarkCorner	DarkCorner	9926.58	272.039	3.195871e+000	3.183432e+000	54.5	28	6.192199e+000	0	0	0	0	0	0	-5.60231	0	0	49.1849	27.52
DATA	938	12	3	66	1	DarkCorner	DarkCorner	9952.41	271.972	3.178404e+000	3.166034e+000	53	24	7.588978e+000	0	0	0	0	0	0	-4.88982	0	0	48.2044	25.8519
DATA	939	12	4	66	1	DarkCorner	DarkCorner	9977.93	271.724	3.162140e+000	3.149833e+000	54	26	8.758955e+000	0	0	0	0	0	0	-3.88814	0	0	48.2044	26.9474
DATA	940	12	5	66	1	DarkCorner	DarkCorner	10003.3	272.194	3.146493e+000	3.134246e+000	52.5	26	6.433829e+000	0	0	0	0	0	0	-6.96097	0	0	47.8731	27.3438
DATA	941	12	6	0	0	A_64_P118227	XM_002728056	10028.8	272.203	1.840913e+001	3.622335e+000	77	26	7.221513e+000	0	0	0	0	0	0	17.3373	1	1	47.8731	28.3103
DATA	942	12	7	0	0	A_64_P051317	NM_130425	10053.7	272.071	1.324850e+002	1.360779e+001	184	28	6.225558e+000	0	0	0	0	0	0	125.308	1	1	50.1463	27.8485
DATA	943	12	8	0	0	A_42_P756350	NM_021772	10079.4	272.155	7.592871e+001	8.198786e+000	135	29	6.687977e+000	0	0	0	0	0	0	72.118	1	1	47.5395	28.0645
DATA	944	12	9	0	0	A_42_P816479	NM_022278	10104.6	271.873	1.391625e+004	1.391629e+003	12856	24	8.479729e+000	0	0	0	0	0	0	13268.5	1	1	47.5395	26.5833
DATA	945	12	10	0	0	A_64_P351634	NM_001029901	10130	271.912	3.066604e+002	3.081935e+001	350	31	7.697088e+000	0	0	0	0	0	0	293.457	1	1	46.8651	28.3871
DATA	946	12	11	0	0	A_64_P136597	A_64_P136597	10155.4	272	4.678505e+002	4.688499e+001	512.5	29	6.691674e+000	0	0	0	0	0	0	449.241	1	1	48.5334	29.3871
DATA	947	12	12	0	0	A_64_P052017	ENSRNOT00000033592	10181	272	2.159868e+001	3.737304e+000	81	23.5	7.192731e+000	0	0	0	0	0	0	20.8059	1	1	54.9904	26.1538
DATA	948	12	13	0	0	A_44_P444485	TC589779	10206.1	272.208	2.083152e+003	2.083374e+002	1980	24	7.633541e+000	0	0	0	0	0	0	2012.55	1	1	46.8651	27.1765
DATA	949	12	14	0	0	A_44_P147373	XM_226249	10231.5	272.12	1.521739e+003	1.522041e+002	1472	29	7.246950e+000	0	0	0	0	0	0	1474.12	1	1	48.8603	29.5806
DATA	950	12	15	0	0	A_64_P059939	NM_001134540	10257.5	272	3.196836e+004	3.196837e+003	30060	27	6.193353e+000	0	0	0	0	0	0	31045	1	1	54.1152	27.4359
DATA	951	12	16	0	0	A_42_P637279	NM_012743	10282.6	272.211	7.096997e+000	3.101035e+000	68	26	9.918501e+000	0	0	0	0	0	0	6.90729	1	0	47.5395	27.28
DATA	952	12	17	0	0	A_42_P771570	XM_001080365	10307.7	272.095	3.204003e+002	3.218137e+001	374.5	29	6.183740e+000	0	0	0	0	0	0	312.443	1	1	48.8603	29.3636
DATA	953	12	18	0	0	A_43_P12942	NM_053817	10333.2	272.012	9.739814e+003	9.739861e+002	9303	29	5.981360e+000	0	0	0	0	0	0	9514.53	1	1	49.1849	27.88
DATA	954	12	19	0	0	A_64_P053307	NM_001191900	10358.6	272.427	9.033798e+000	3.135814e+000	68.5	28	6.955347e+000	0	0	0	0	0	0	8.83876	1	0	57.5363	27.6552
DATA	955	12	20	0	0	A_42_P595630	NM_001013189	10383.8	271.703	4.714036e+003	4.714131e+002	4671.5	26.5	6.171868e+000	0	0	0	0	0	0	4617.78	1	1	45.1352	26.6667
DATA	956	12	21	0	0	A_64_P154760	A_64_P154760	10409.5	272.069	5.244510e+002	5.253060e+001	578.5	28	7.334210e+000	0	0	0	0	0	0	514.325	1	1	48.2044	29.1724
DATA	957	12	22	0	0	A_42_P764359	NM_145086	10434.8	272.465	1.007334e+003	1.007779e+002	1020	29.5	9.577032e+000	0	0	0	0	0	0	988.77	1	1	47.5395	31.0667
DATA	958	12	23	0	0	A_43_P10405	NM_001109257	10460.1	272.194	4.865034e+001	5.711138e+000	109.5	23.5	6.596411e+000	0	0	0	0	0	0	47.7823	1	1	46.1809	24.7333
DATA	959	12	24	0	0	A_44_P269950	ENSRNOT00000014054	10485.6	272.427	2.689607e+001	4.021760e+000	85	26	4.819240e+000	0	0	0	0	0	0	26.428	1	1	57.5363	27.0741
DATA	960	12	25	0	0	A_44_P160763	NM_001106513	10511.4	272.427	1.456614e+002	1.486975e+001	208	26	7.127261e+000	0	0	0	0	0	0	143.155	1	1	57.5363	26.7419
DATA	961	12	26	0	0	A_64_P127678	NM_001008553	10536.3	271.812	1.029844e+003	1.030278e+002	1080	30	7.624472e+000	0	0	0	0	0	0	1012.04	1	1	46.5243	30.1515
DATA	962	12	27	0	0	A_42_P684885	NM_133517	10562	272.455	3.426746e+000	3.009725e+000	66	28	7.724420e+000	0	0	0	0	0	0	3.36702	1	0	55.8519	29.6667
DATA	963	12	28	0	0	A_64_P102708	NM_001034149	10587.4	272.427	9.836953e+000	3.149025e+000	70	26	8.712705e+000	0	0	0	0	0	0	9.66135	1	0	57.5363	27.5417
DATA	964	12	29	0	0	A_42_P547629	NM_001106718	10612.2	272.44	4.631907e+002	4.641568e+001	497.5	30	7.930452e+000	0	0	0	1	0	0	454.645	1	1	49.1849	30.2778
DATA	965	12	30	0	0	A_42_P522285	NM_001044263	10637.7	272.579	3.813876e+002	3.825624e+001	427	30	6.256172e+000	0	0	0	0	0	0	374.048	1	1	49.5074	29.9444
DATA	966	12	31	0	0	A_64_P164423	NM_057193	10663.9	272.806	4.389163e+001	5.315767e+000	99	32	7.935348e+000	0	0	0	0	0	0	43.0027	1	1	46.1809	31.8286
DATA	967	12	32	0	0	A_44_P256143	NM_001047917	10688.9	272.5	1.096724e+002	1.137081e+001	162	32	8.247406e+000	0	0	0	0	0	0	107.318	1	1	56.9804	32.6552
DATA	968	12	33	0	0	A_44_P727294	NM_001160314	10713.9	272.268	2.201128e+003	2.201333e+002	2180.5	35	7.770654e+000	0	0	0	0	0	0	2150.84	1	1	47.5395	34.4375
DATA	969	12	34	0	0	A_64_P108404	NM_001000092	10739.6	272.296	6.747677e+001	7.389228e+000	128	31	6.157922e+000	0	0	0	0	0	0	65.8292	1	1	48.2044	30
DATA	970	12	35	0	0	A_44_P520829	NM_001108777	10764.4	272.406	5.947266e+002	5.954912e+001	617	30	7.614405e+000	0	0	0	0	0	0	579.209	1	1	47.5395	31.3333
DATA	971	12	36	0	0	A_44_P229677	NM_001014221	10790.3	272.25	1.524911e+003	1.525211e+002	1502.5	33	7.609083e+000	0	0	0	0	0	0	1482.12	1	1	47.8731	33.25
DATA	972	12	37	0	0	A_64_P126215	A_64_P126215	10815.7	272.5	8.163075e+000	3.137260e+000	69	30	7.112317e+000	0	0	0	0	0	0	7.91742	1	0	57.5363	30.9667
DATA	973	12	38	0	0	A_64_P090035	A_64_P090035	10841.1	272.43	1.383596e+003	1.383929e+002	1381	27.5	7.258274e+000	0	0	0	0	0	0	1338.85	1	1	50.1463	29.3571
DATA	974	12	39	0	0	A_64_P089330	ENSRNOT00000012374	10866.7	272.493	1.304710e+002	1.339745e+001	184	27	5.030482e+000	0	0	0	0	0	0	125.937	1	1	48.8603	26.9333
DATA	975	12	40	0	0	A_44_P454429	NM_012712	10891.9	271.822	2.970205e+002	2.985845e+001	363.5	25	6.651975e+000	0	0	0	0	0	0	285.923	1	1	36.9964	25.0345
DATA	976	12	41	0	1	ERCC-00144_60	ERCC-00144_60	10917.5	272.5	2.151023e+001	3.740754e+000	79.5	27.5	1.046555e+001	0	0	0	0	0	0	20.6499	1	1	57.5363	28.75
DATA	977	12	42	0	0	A_42_P759843	XR_086347	10942.7	272.5	3.337602e+003	3.337743e+002	3232	32	1.316481e+001	0	0	0	0	0	0	3194.71	1	1	57.5363	33.8571
DATA	978	12	43	0	0	A_43_P14264	NM_053653	10968.4	272.573	7.492038e+002	7.498363e+001	784	31	7.742840e+000	0	0	0	0	0	0	714.869	1	1	57.5363	30.4815
DATA	979	12	44	0	0	A_64_P011223	NM_024353	10993.1	272.542	4.417114e+002	4.427901e+001	500	30.5	8.099647e+000	0	0	0	0	0	0	420.131	1	1	38.2652	31.8235
DATA	980	12	45	0	0	A_42_P701169	NM_001109572	11019	272.545	1.190598e+003	1.191001e+002	1165	31	8.552103e+000	0	0	0	0	0	0	1128.49	1	1	55.8519	32.8
DATA	981	12	46	0	0	A_64_P143307	NM_001014106	11044.4	272.573	5.659966e+002	5.668508e+001	605	35	7.398506e+000	0	0	0	0	0	0	534.566	1	1	57.5363	33.2593
DATA	982	12	47	0	0	A_44_P480636	NM_001005381	11069.2	272.571	2.673681e+002	2.691847e+001	301	31	8.451856e+000	0	0	0	0	0	0	251.613	1	1	47.5395	31.7857
DATA	983	12	48	0	0	A_64_P163564	ENSRNOT00000010609	11095.1	272.708	7.748126e+001	8.358026e+000	133.5	32	8.267068e+000	0	0	0	0	0	0	72.6321	1	1	47.8731	31.4186
DATA	984	12	49	0	0	A_42_P774028	NM_001017447	11120.1	272.356	3.077586e+003	3.077747e+002	2885	28	5.997126e+000	0	0	0	0	0	0	2873.61	1	1	48.5334	27.5862
DATA	985	12	50	0	0	A_43_P20110	ENSRNOT00000050558	11146	272.545	2.408721e+001	3.973050e+000	84	31	4.939203e+000	0	0	0	0	0	0	22.398	1	1	55.8519	31.2941
DATA	986	12	51	0	0	A_44_P552865	NM_001170399	11171	272.5	7.716474e+002	7.722994e+001	757	32.5	7.544138e+000	0	0	0	0	0	0	714.562	1	1	47.8731	34.3929
DATA	987	12	52	0	0	A_43_P17428	NM_001012189	11196.5	272.5	2.952095e+002	2.969243e+001	330	27	7.032682e+000	0	0	0	0	0	0	272.188	1	1	46.5243	27.7
DATA	988	12	53	0	0	A_64_P146222	TC633165	11221.9	272.743	2.379429e+004	2.379431e+003	21522	31.5	9.504886e+000	0	0	0	0	0	0	21842.7	1	1	48.2044	31.6667
DATA	989	12	54	0	0	A_64_P054856	NM_001135894	11247.2	272.614	4.991500e+002	5.001844e+001	510	30	5.307043e+000	0	0	0	0	0	0	456.131	1	1	47.2035	29.2
DATA	990	12	55	0	0	A_64_P154982	ENSRNOT00000018118	11272.6	272.873	1.272456e+004	1.272460e+003	11423	30	6.365215e+000	0	0	0	0	0	0	11574.5	1	1	47.5395	29.8857
DATA	991	12	56	0	0	A_42_P726363	NM_031536	11298.4	272.573	2.461528e+001	4.073534e+000	86	30	7.641709e+000	0	0	0	0	0	0	22.282	1	1	57.5363	31.2941
DATA	992	12	57	0	0	A_64_P139685	A_64_P139685	11323.6	272.573	3.202046e+001	4.570444e+000	90	31	8.130524e+000	0	0	0	0	0	0	28.8469	1	1	65	31.5185
DATA	993	12	58	0	0	A_64_P114104	NM_001034136	11348.8	272.806	6.162829e+003	6.162916e+002	5333	34	8.324488e+000	0	0	0	0	0	0	5525.24	1	1	47.5395	34.4167
DATA	994	12	59	0	0	A_42_P480273	A_42_P480273	11374.3	272.88	6.888315e+003	6.888394e+002	6051	29	7.384378e+000	0	0	0	0	0	0	6144.79	1	1	48.8603	31.0645
DATA	995	12	60	0	0	A_64_P004344	ENSRNOT00000047696	11399.7	272.704	1.075642e+004	1.075647e+003	9138.5	27	8.489073e+000	0	0	0	0	0	0	9546.54	1	1	47.2035	28.9333
DATA	996	12	61	0	0	A_42_P723584	NM_001109099	11424.9	272.904	2.679553e+003	2.679759e+002	2320	28	7.010980e+000	0	0	0	1	0	0	2366.13	1	1	46.8651	29.3333
DATA	997	12	62	0	0	A_64_P114813	A_64_P114813	11451	272.846	1.199661e+001	3.553714e+000	74	26.5	6.498077e+000	0	0	0	0	0	0	10.5368	1	0	48.2044	26.925
DATA	998	12	63	0	0	A_64_P034551	NM_053818	11476	272.986	1.315531e+002	1.357821e+001	178.5	26	6.596295e+000	0	0	0	0	0	0	114.951	1	1	46.8651	27.4444
DATA	999	12	64	0	0	A_42_P492976	NM_001126099	11501.5	273	3.055301e+002	3.073945e+001	329	30.5	7.363977e+000	0	0	0	0	0	0	265.547	1	1	54.1152	30.8824
DATA	1000	12	65	0	0	A_64_P141799	NM_001025709	11526.8	272.899	8.988083e+002	8.994506e+001	825.5	32	6.937101e+000	0	0	0	0	0	0	776.996	1	1	49.1849	30.1364
DATA	1001	12	66	0	0	A_44_P337088	NM_133609	11551.9	272.9	6.947401e+002	6.955798e+001	634	27	8.448678e+000	0	0	0	0	0	0	597.38	1	1	46.8651	28.3611
DATA	1002	12	67	0	0	A_64_P137961	A_64_P137961	11577.7	273.045	9.158005e+001	9.781279e+000	142	30	6.632439e+000	0	0	0	0	0	0	78.3135	1	1	45.4864	29.4516
DATA	1003	12	68	0	0	A_64_P053822	ENSRNOT00000028268	11603	273	9.997246e+001	1.057732e+001	150	30	8.714647e+000	0	0	0	0	0	0	85.022	1	1	54.9904	31.5152
DATA	1004	12	69	0	0	A_42_P484456	NM_001106601	11628	273	3.515596e+003	3.515767e+002	2979	28	8.294965e+000	0	0	0	1	0	0	2973.66	1	1	46.8651	29.1613
DATA	1005	12	70	0	0	A_44_P508632	NM_001107594	11653.6	273.069	8.030661e+000	3.584009e+000	67.5	29	5.978573e+000	0	0	0	0	0	0	6.755	1	0	65	28.92
DATA	1006	12	71	0	0	A_64_P080598	NM_001047865	11679.5	273	3.872855e+001	5.228631e+000	94	31.5	8.335650e+000	0	0	0	0	0	0	32.3921	1	1	54.1152	32.1765
DATA	1007	12	72	0	0	A_64_P144243	A_64_P144243	11704.5	273	2.775940e+001	4.492361e+000	87	28	1.061018e+001	0	0	0	0	0	0	23.0908	1	1	65	30.1
DATA	1008	12	73	0	0	A_44_P479917	NM_030864	11730	273	5.131041e+001	6.240455e+000	105	22.5	6.979467e+000	0	0	0	0	0	0	42.4431	1	1	54.9904	24.75
DATA	1009	12	74	0	0	A_44_P974524	NM_001025764	11755.5	273	5.799378e+001	6.811035e+000	108	25	6.566787e+000	0	0	0	0	0	0	47.7043	1	1	54.1152	25.6286
DATA	1010	12	75	0	0	A_42_P522899	NM_021578	11780.6	273	1.138393e+002	1.193701e+001	155	31.5	6.685193e+000	0	0	0	0	0	0	93.1284	1	1	48.5334	30.6071
DATA	1011	12	76	0	0	A_64_P069892	NM_019201	11805.8	273.194	2.681904e+004	2.681907e+003	21203	33.5	8.161868e+000	0	0	0	0	0	0	21820.9	1	1	47.5395	34.0667
DATA	1012	12	77	0	0	A_44_P415199	NM_001108748	11831.8	273.339	2.620915e+001	4.478361e+000	83	32.5	9.597914e+000	0	0	0	0	0	0	21.2053	1	1	44.4243	33.4063
DATA	1013	12	78	0	0	A_64_P034610	NM_022622	11856.9	273.237	1.778247e+002	1.815343e+001	207.5	32	5.960461e+000	0	0	0	0	0	0	143.094	1	1	49.1849	30.7931
DATA	1014	12	79	0	0	A_42_P473828	ENSRNOT00000035309	11882.1	273.149	2.770424e+003	2.770667e+002	2175.5	30	5.309566e+000	0	0	0	1	0	0	2217.26	1	1	47.8731	29.75
DATA	1015	12	80	66	1	DarkCorner	DarkCorner	11907.6	273.427	3.705141e+000	3.690720e+000	54	29	5.954487e+000	0	0	0	0	0	0	-7.41638	0	0	57.5363	29.4516
DATA	1016	12	81	66	1	DarkCorner	DarkCorner	11933.4	273.427	3.725394e+000	3.710895e+000	55	27	8.846036e+000	0	0	0	0	0	0	-5.88827	0	0	57.5363	29.8974
DATA	1017	12	82	66	1	DarkCorner	DarkCorner	11958.5	273.095	3.745334e+000	3.730757e+000	56	31	7.608817e+000	0	0	0	0	0	0	-7.81991	0	0	48.5334	32.5862
DATA	1018	12	83	66	1	DarkCorner	DarkCorner	11984	273.455	3.764685e+000	3.750033e+000	53.5	29.5	8.571239e+000	0	0	0	0	0	0	-8.84848	0	0	55.8519	30.4412
DATA	1019	12	84	66	1	DarkCorner	DarkCorner	12009.3	273.203	3.784401e+000	3.769672e+000	60	29	7.155899e+000	0	0	0	0	0	0	-3.22949	0	0	46.8651	31.2759
DATA	1020	12	85	66	1	DarkCorner	DarkCorner	12034.6	273.427	3.803413e+000	3.788610e+000	63	30	7.485030e+000	0	0	0	0	0	0	-0.207638	0	0	57.5363	31.0441
DATA	1021	13	1	66	1	DarkCorner	DarkCorner	9889	279	3.219012e+000	3.222418e+000	62	24	6.611264e+000	0	0	0	0	0	0	2.93262	0	0	65	25.0739
DATA	1022	13	2	66	1	DarkCorner	DarkCorner	9914.5	279	3.200493e+000	3.188036e+000	53	28	4.737024e+000	0	0	0	0	0	0	-4.08754	0	0	54.1152	27.2424
DATA	1023	13	3	66	1	DarkCorner	DarkCorner	9939.4	279.147	3.183220e+000	3.170830e+000	51	25	6.057227e+000	0	0	0	0	0	0	-6.37718	0	0	46.8651	24.76
DATA	1024	13	4	66	1	DarkCorner	DarkCorner	9965.35	279.127	3.166226e+000	3.153903e+000	51.5	25	8.539126e+000	0	0	0	0	0	0	-7.03257	0	0	44.7812	27.2
DATA	1025	13	5	66	1	DarkCorner	DarkCorner	9990.3	279.149	3.150734e+000	3.138471e+000	54	28	7.574739e+000	0	0	0	0	0	0	-3.83656	0	0	48.5334	28.72
DATA	1026	13	6	0	0	A_64_P029912	NM_001109143	10015.9	279.386	2.299973e+002	2.321084e+001	276	26	6.795959e+000	0	0	0	0	0	0	216.349	1	1	57.259	28.4333
DATA	1027	13	7	0	0	A_42_P574731	NM_012948	10041.2	279.632	4.567548e+003	4.567654e+002	4287	28	7.426920e+000	0	0	0	0	0	0	4315.9	1	1	49.5074	27.6774
DATA	1028	13	8	0	0	A_44_P137448	NM_017043	10066.7	279.547	4.266007e+002	4.277228e+001	462	30	5.792385e+000	0	0	0	1	0	0	404.817	1	1	52.0157	29.1379
DATA	1029	13	9	0	0	A_42_P770614	NM_001013235	10092.4	279.427	4.063758e+004	4.063759e+003	37998	28	7.585612e+000	0	0	0	1	0	0	38717.8	1	1	57.5363	28.2174
DATA	1030	13	10	0	0	A_42_P785419	NM_199501	10117.2	279.216	1.854161e+002	1.879446e+001	238.5	26.5	8.229188e+000	0	0	0	0	0	0	177.299	1	1	48.8603	26.7333
DATA	1031	13	11	0	0	A_42_P581043	TC622715	10142.7	279.395	7.984833e+003	7.984892e+002	7385	30	8.399247e+000	0	0	0	0	0	0	7662.41	1	1	49.5074	29.2121
DATA	1032	13	12	0	0	A_64_P098532	NM_001029928	10168.4	279.427	1.475433e+001	3.389511e+000	73.5	29	7.005492e+000	0	0	0	0	0	0	14.2056	1	0	57.5363	29.3333
DATA	1033	13	13	0	0	A_64_P090758	A_64_P090758	10193.6	279.36	1.561288e+003	1.561584e+002	1565	24	6.482541e+000	0	0	0	0	0	0	1507.72	1	1	48.8603	27.24
DATA	1034	13	14	0	0	A_43_P12079	NM_021583	10219	279.481	9.916006e+001	1.036975e+001	154.5	27	6.515852e+000	0	0	0	0	0	0	96.027	1	1	50.4627	27.7059
DATA	1035	13	15	0	0	A_64_P001947	A_64_P001947	10244.5	279.5	1.940785e+001	3.595013e+000	79	28	5.673069e+000	0	0	0	0	0	0	18.8429	1	1	57.5363	28.9394
DATA	1036	13	16	0	0	A_64_P064461	A_64_P064461	10269.9	279.5	5.052396e+001	5.885733e+000	108	29	6.273263e+000	0	0	0	0	0	0	49.1669	1	1	65	28.4688
DATA	1037	13	17	0	0	A_42_P575398	NM_020538	10295	278.906	3.024910e+000	3.013137e+000	54	30	8.402317e+000	0	0	0	0	0	0	-4.60022	0	0	40.6843	28.6471
DATA	1038	13	18	0	0	A_42_P482623	NM_199463	10320.7	279.479	1.598177e+003	1.598460e+002	1585	29	7.594917e+000	0	0	0	0	0	0	1561.38	1	1	48.5334	27.8
DATA	1039	13	19	0	0	A_42_P738431	NM_019175	10345.6	279.316	1.681869e+003	1.682137e+002	1619	29.5	1.028787e+001	0	0	0	0	0	0	1645.74	1	1	49.1849	31.2333
DATA	1040	13	20	0	0	A_44_P1027780	ENSRNOT00000065815	10371.6	279.392	2.018816e+001	3.614537e+000	80	23.5	6.221386e+000	0	0	0	0	0	0	19.783	1	1	49.1849	23.9375
DATA	1041	13	21	0	0	A_42_P479802	NM_053679	10396.5	279.5	1.894744e+003	1.894980e+002	1904	26	6.463880e+000	0	0	0	1	0	0	1858.89	1	1	49.1849	26.6786
DATA	1042	13	22	0	0	A_44_P496624	NM_022302	10422	279.521	9.253013e+001	9.724672e+000	152.5	29	5.494832e+000	0	0	0	0	0	0	90.8667	1	1	48.5334	29.5455
DATA	1043	13	23	0	0	A_42_P700753	FQ212883	10447.3	279.605	2.180342e+003	2.180547e+002	2151	26	8.654665e+000	0	0	0	0	0	0	2142.74	1	1	49.5074	28.25
DATA	1044	13	24	0	0	A_44_P229299	NM_001100678	10473.1	279.591	5.203323e+002	5.211896e+001	573	24.5	5.623450e+000	0	0	0	0	0	0	511.627	1	1	52.3208	25.8333
DATA	1045	13	25	0	0	A_42_P728472	NM_001007600	10498	279.5	7.548499e+003	7.548558e+002	7226	26	5.262071e+000	0	0	0	0	0	0	7424.37	1	1	48.5334	26.7576
DATA	1046	13	26	0	0	A_42_P488904	NM_001108947	10523.6	279.479	1.060116e+004	1.060120e+003	10249	30	8.709900e+000	0	0	0	0	0	0	10427.8	1	1	48.2044	29.9355
DATA	1047	13	27	0	0	A_42_P458494	NM_001034951	10548.8	279.475	1.096474e+002	1.136437e+001	167.5	29	7.673793e+000	0	0	0	0	0	0	107.842	1	1	42.9674	30.875
DATA	1048	13	28	0	0	A_64_P100331	ENSRNOT00000048614	10574.7	279.588	1.871137e+001	3.525648e+000	79	26	6.633250e+000	0	0	0	0	0	0	18.3976	1	1	46.8651	27
DATA	1049	13	29	0	0	A_64_P113989	NM_181631	10599.6	279.734	1.154981e+004	1.154985e+003	10945	29	9.369657e+000	0	0	0	0	0	0	11350.5	1	1	50.7771	30.0952
DATA	1050	13	30	0	0	A_64_P042105	ENSRNOT00000061599	10625.5	279.5	4.358184e+001	5.286338e+000	103	30	6.806600e+000	0	0	0	0	0	0	42.7969	1	1	57.5363	29.3636
DATA	1051	13	31	0	0	A_64_P044435	NM_001015020	10650.6	280.265	5.963742e+002	5.971255e+001	636	29	8.358825e+000	0	0	0	0	0	0	585.154	1	1	46.5243	30.5313
DATA	1052	13	32	0	0	A_64_P149011	NM_031352	10676	279.92	4.855014e+003	4.855107e+002	4678.5	30	7.626438e+000	0	0	0	0	0	0	4758.18	1	1	52.3208	30.3448
DATA	1053	13	33	0	0	A_42_P580844	NM_019296	10701.3	279.746	3.095837e+002	3.110356e+001	350.5	33	8.185774e+000	0	0	0	0	0	0	303.008	1	1	47.5395	32.4
DATA	1054	13	34	0	0	A_64_P052972	A_64_P052972	10727	279.545	1.620459e+002	1.648112e+001	220	32	6.548961e+000	0	0	0	0	0	0	158.36	1	1	55.8519	32
DATA	1055	13	35	0	0	A_44_P454300	NM_001003979	10752.5	280.115	3.023033e+000	3.011268e+000	61	28.5	6.723513e+000	0	0	0	0	0	0	-0.625713	0	0	49.5074	29.5909
DATA	1056	13	36	0	0	A_44_P149743	ENSRNOT00000005476	10777.6	279.573	1.381103e+001	3.318105e+000	74	31.5	7.718938e+000	0	0	0	0	0	0	13.4495	1	0	57.5363	32.7857
DATA	1057	13	37	0	0	A_42_P841017	NM_173309	10802.5	279.824	7.993319e+003	7.993376e+002	7599	30.5	6.030718e+000	0	0	0	0	0	0	7768.78	1	1	48.8603	32.25
DATA	1058	13	38	0	0	A_44_P206844	NM_013074	10828.4	279.973	1.394077e+002	1.426620e+001	191.5	30	8.119802e+000	0	0	0	0	0	0	135.189	1	1	48.5334	31.2581
DATA	1059	13	39	0	0	A_64_P073400	NM_001000705	10853.9	279.909	1.455442e+002	1.486790e+001	201	27	6.337972e+000	0	0	0	0	0	0	140.802	1	1	48.2044	27.6452
DATA	1060	13	40	0	0	A_64_P066676	A_64_P066676	10879.4	279.573	7.589412e+001	8.633504e+000	111	27.5	6.666868e+000	0	0	0	0	0	0	73.2305	1	1	57.5363	26.0333
DATA	1061	13	41	0	0	A_44_P386965	NM_001134594	10904.6	279.573	4.028619e+001	6.112995e+000	81	25	7.162027e+000	0	0	0	0	0	0	38.7679	1	1	57.5363	25.8065
DATA	1062	13	42	0	0	A_64_P095895	NM_019338	10930.4	279.573	6.917152e+001	7.564591e+000	126.5	27.5	8.640869e+000	0	0	0	0	0	0	66.3704	1	1	65	27.7692
DATA	1063	13	43	1028	1	(+)E1A_r60_a22	E1A_r60_a22	10955.6	279.317	2.890883e+002	2.907152e+001	342	30	1.024527e+001	0	0	0	1	0	0	276.541	1	1	43.3362	31.4138
DATA	1064	13	44	0	0	A_42_P541625	NM_001126090	10980.5	279.853	2.288914e+004	2.288916e+003	20993.5	31	7.573195e+000	0	0	0	0	0	0	21829.2	1	1	49.8279	31.7407
DATA	1065	13	45	0	0	A_64_P033895	NM_001126084	11006.2	280.304	2.557125e+002	2.575738e+001	304.5	32	8.083405e+000	0	0	0	0	0	0	243.066	1	1	46.8651	33.359
DATA	1066	13	46	0	0	A_64_P012546	NM_022300	11031.5	280	6.972746e+004	6.972747e+003	66284.5	28	7.570522e+000	0	0	0	0	0	0	66047.9	1	1	54.1152	30.2069
DATA	1067	13	47	0	0	A_42_P495598	NM_001014026	11057.1	279.935	3.125210e+000	3.113046e+000	60	34	9.743076e+000	0	0	0	0	0	0	-1.84295	0	0	54.4085	33.3333
DATA	1068	13	48	0	0	A_42_P483463	NM_001130999	11082.1	280.11	4.636501e+003	4.636606e+002	4279	32	7.566051e+000	0	0	0	0	0	0	4359.9	1	1	46.8651	31.1707
DATA	1069	13	49	0	0	A_42_P575104	NM_153737	11107.9	279.935	6.316564e+001	7.052579e+000	121	28.5	8.874925e+000	0	0	0	0	0	0	59.162	1	1	54.4085	29.4167
DATA	1070	13	50	0	0	A_42_P461726	NM_133549	11133.1	279.873	3.310519e+001	4.569233e+000	93	30	7.082717e+000	0	0	0	0	0	0	30.884	1	1	46.8651	29.3235
DATA	1071	13	51	0	0	A_64_P098688	A_64_P098688	11158.5	280	8.962410e+004	8.962410e+003	82401	33	8.515640e+000	0	0	0	0	0	0	83268	1	1	54.1152	35.129
DATA	1072	13	52	0	0	A_64_P105797	A_64_P105797	11183.8	280.043	2.931465e+001	4.321857e+000	88	32	7.232930e+000	0	0	0	0	0	0	27.1209	1	1	46.8651	32.3793
DATA	1073	13	53	0	0	A_42_P545943	NM_019291	11208.9	280.2	4.435949e+003	4.436064e+002	3948	29	6.527622e+000	0	0	0	0	0	0	4086.49	1	1	46.8651	28.2121
DATA	1074	13	54	0	0	A_44_P520045	NM_001001371	11234.8	280.057	1.284776e+002	1.324122e+001	176.5	31	4.678322e+000	0	0	0	0	0	0	117.817	1	1	46.8651	30.3793
DATA	1075	13	55	0	0	A_44_P306964	NM_001012184	11260.5	280	4.979490e+001	5.929219e+000	106.5	29	6.240599e+000	0	0	0	0	0	0	45.4523	1	1	54.1152	27.1515
DATA	1076	13	56	0	0	A_44_P156043	NM_001039012	11285	280.203	2.153221e+003	2.153464e+002	1951	30	7.318536e+000	0	0	0	0	0	0	1956.69	1	1	46.8651	31
DATA	1077	13	57	0	0	A_64_P054686	TC585752	11310.9	279.918	2.488377e+004	2.488379e+003	21998	31.5	8.162784e+000	0	0	0	0	0	0	22502	1	1	51.0895	33.7
DATA	1078	13	58	0	0	A_42_P575104	NM_153737	11336.5	279.814	6.422572e+001	7.204822e+000	119	31	1.086115e+001	0	0	0	0	0	0	57.7946	1	1	47.5395	32.7308
DATA	1079	13	59	0	0	A_64_P142194	NM_053426	11361.7	280.083	1.174721e+003	1.175179e+002	1085	33	6.126399e+000	0	0	0	0	0	0	1051.98	1	1	50.1463	32.9259
DATA	1080	13	60	0	0	A_64_P043314	A_64_P043314	11387.5	280	1.226356e+002	1.269918e+001	170	27	7.995207e+000	0	0	0	0	0	0	109.263	1	1	54.1152	29.56
DATA	1081	13	61	0	0	A_44_P684315	NM_001109104	11412.5	280	4.502492e+004	4.502493e+003	38461	28	7.581322e+000	0	0	0	0	0	0	39915.2	1	1	54.1152	30.4583
DATA	1082	13	62	0	0	A_64_P142620	NM_201417	11437.7	280.145	7.549483e+001	8.251691e+000	132	26	6.057408e+000	0	0	0	0	0	0	66.5882	1	1	46.1809	26.4054
DATA	1083	13	63	0	0	A_42_P568419	NM_001011894	11463.2	280.127	1.768752e+003	1.769069e+002	1575.5	27	5.805600e+000	0	0	0	0	0	0	1551.93	1	1	49.1849	26.8529
DATA	1084	13	64	0	0	A_42_P519868	NM_053906	11488.8	280.301	1.802943e+002	1.834098e+001	215	27.5	7.262889e+000	0	0	0	0	0	0	157.362	1	1	47.8731	28.9118
DATA	1085	13	65	0	0	A_43_P12346	NM_022943	11514.4	280.069	2.003063e+002	2.031455e+001	234	32	9.242212e+000	0	0	0	0	0	0	173.884	1	1	53.8203	32.875
DATA	1087	13	67	0	0	A_44_P556989	NM_012610	11565	280.455	7.572316e+001	8.309108e+000	125	30	7.426662e+000	0	0	0	0	0	0	65.0383	1	1	65	29.0303
DATA	1088	13	68	0	0	A_64_P113079	XM_218149	11590.4	280.427	4.671497e+000	3.470999e+000	65	33	8.184427e+000	0	0	0	0	0	0	3.99051	1	0	57.5363	34.1212
DATA	1089	13	69	0	0	A_64_P003937	NM_173111	11615.3	280.338	5.801178e+003	5.801281e+002	4776	26	8.544115e+000	0	0	0	0	0	0	4928.91	1	1	48.5334	28.2424
DATA	1090	13	70	0	0	A_42_P771337	NM_001012015	11641.5	280.147	1.027673e+002	1.084925e+001	149.5	27	6.842529e+000	0	0	0	1	0	0	86.8182	1	1	49.8279	27.9655
DATA	1091	13	71	0	0	A_44_P401035	A_44_P401035	11666.3	280.306	6.193490e+001	7.112269e+000	113.5	31.5	7.172866e+000	0	0	0	0	0	0	52.0436	1	1	48.2044	32.0833
DATA	1092	13	72	0	0	A_42_P536292	NM_033359	11692	280.455	6.343983e+002	6.353718e+001	586	33	8.404556e+000	0	0	0	0	0	0	530.131	1	1	55.8519	33.3548
DATA	1093	13	73	0	0	A_44_P128564	NM_001109121	11717.4	280.427	1.321855e+002	1.368318e+001	171	29	1.171431e+001	0	0	0	0	0	0	109.85	1	1	57.5363	29.9259
DATA	1094	13	74	0	0	A_64_P069957	NM_173315	11742.6	280.427	4.678552e+001	5.875869e+000	96.5	24	5.527993e+000	0	0	0	0	0	0	38.6676	1	1	57.5363	24.3939
DATA	1095	13	75	0	0	A_44_P538691	NM_031772	11768.2	280.045	1.465405e+002	1.508384e+001	178	26	6.714738e+000	0	0	0	0	0	0	120.429	1	1	45.835	27.5938
DATA	1096	13	76	0	0	A_44_P499231	NM_001034148	11793.2	280.279	3.112755e+002	3.133438e+001	317	31	8.077262e+000	0	0	0	0	0	0	254.44	1	1	46.8651	29.3704
DATA	1097	13	77	0	0	A_64_P121489	XM_001065883	11818.9	280.5	1.598866e+001	3.951965e+000	75	32	6.930869e+000	0	0	0	0	0	0	12.9978	1	0	65	32.5862
DATA	1098	13	78	0	0	A_42_P507072	FQ213070	11844	280.5	3.896722e+003	3.896891e+002	3102	32	8.929389e+000	0	0	0	0	0	0	3150.74	1	1	51.0895	32.3448
DATA	1099	13	79	0	0	A_64_P120075	ENSRNOT00000027841	11868.4	279.852	2.657593e+002	2.682586e+001	314.5	30	5.724218e+000	0	0	0	0	0	0	213.724	1	1	41.4593	30.45
DATA	1100	13	80	0	0	A_44_P1007362	NM_138864	11895.1	280.5	2.491392e+002	2.518328e+001	259.5	29	5.495152e+000	0	0	0	0	0	0	199.262	1	1	56.9804	28.5676
DATA	1101	13	81	66	1	DarkCorner	DarkCorner	11920.4	280.359	3.707686e+000	3.693256e+000	54	30	8.873906e+000	0	0	0	0	0	0	-9.15397	0	0	49.8279	30.9394
DATA	1102	13	82	66	1	DarkCorner	DarkCorner	11945.3	280.72	3.726583e+000	3.712078e+000	54.5	31	6.736510e+000	0	0	0	0	0	0	-8.292	0	0	53.8203	30.7941
DATA	1103	13	83	66	1	DarkCorner	DarkCorner	11971.2	280.548	3.746726e+000	3.732143e+000	59	31	8.610455e+000	0	0	0	0	0	0	-5.18945	0	0	43.3362	32.2647
DATA	1104	13	84	66	1	DarkCorner	DarkCorner	11996.9	280.686	3.766162e+000	3.751503e+000	61	29	7.251631e+000	0	0	0	0	0	0	-2.34396	0	0	47.2035	29.8846
DATA	1105	13	85	66	1	DarkCorner	DarkCorner	12022.7	280.148	3.786369e+000	3.771632e+000	61	28.5	6.390815e+000	0	0	0	0	0	0	-1.81224	0	0	50.7771	29.9565
DATA	1106	14	1	66	1	DarkCorner	DarkCorner	9900.86	286.038	3.206305e+000	3.193826e+000	54	26	6.204736e+000	0	0	0	0	0	0	-2.16018	0	0	49.5074	25.7018
DATA	1107	14	2	66	1	DarkCorner	DarkCorner	9926.72	286.708	3.187729e+000	3.175322e+000	59	26	5.137494e+000	0	0	0	0	0	0	-1.32887	0	0	48.2044	25.9231
DATA	1108	14	3	66	1	DarkCorner	DarkCorner	9952.66	286.215	3.170671e+000	3.158331e+000	51	27	9.089738e+000	0	0	0	0	0	0	-8.0445	0	0	50.4627	28.04
DATA	1109	14	4	66	1	DarkCorner	DarkCorner	9977.58	286.411	3.154791e+000	3.142513e+000	53.5	27.5	8.142497e+000	0	0	0	0	0	0	-6.93725	0	0	48.5334	29.1786
DATA	1110	14	5	66	1	DarkCorner	DarkCorner	10003.5	286.612	3.139183e+000	3.126965e+000	52	29.5	6.764614e+000	0	0	0	0	0	0	-5.82433	0	0	52.0157	30
DATA	1111	14	6	0	0	A_64_P151415	NM_001191684	10028.6	286.818	2.077223e+002	2.100416e+001	254	26	7.081162e+000	0	0	0	0	0	0	196.065	1	1	50.1463	27.0714
DATA	1112	14	7	0	0	A_42_P475623	NM_053394	10053.9	286.726	1.314567e+003	1.314932e+002	1237	26	7.237856e+000	0	0	0	0	0	0	1246.17	1	1	48.2044	27.7143
DATA	1113	14	8	0	0	A_44_P123636	ENSRNOT00000023689	10079.4	286.573	3.098727e+000	3.089154e+000	59	30.5	6.055680e+000	0	0	0	0	0	0	1.17976	0	0	65	30.1333
DATA	1114	14	9	0	0	A_64_P135207	ENSRNOT00000043866	10104.6	286.573	3.302622e+002	3.316906e+001	381	30	7.815309e+000	0	0	0	0	0	0	315.561	1	1	57.5363	29.4783
DATA	1115	14	10	0	0	A_42_P516693	NM_001107330	10130.4	286.573	4.433625e+000	3.095562e+000	66	26	7.169158e+000	0	0	0	0	0	0	4.25185	1	0	57.5363	26.5556
DATA	1116	14	11	0	0	A_64_P125447	NM_001109231	10155.6	286.573	1.293081e+002	1.328643e+001	184	31	1.330617e+001	0	0	0	0	0	0	124.421	1	1	57.5363	33.1481
DATA	1117	14	12	0	0	A_42_P701756	NM_001107646	10180.9	286.529	2.451753e+003	2.451942e+002	2346	27	6.764512e+000	0	0	0	1	0	0	2366.43	1	1	47.8731	28.5172
DATA	1118	14	13	0	0	A_44_P344181	NM_017204	10205.9	286.771	8.853346e+002	8.858547e+001	895	26	6.574557e+000	0	0	0	0	0	0	856.989	1	1	46.5243	27.5313
DATA	1119	14	14	0	0	A_64_P035330	ENSRNOT00000066415	10231.7	286.778	5.334139e+002	5.342721e+001	581	29	6.408080e+000	0	0	0	0	0	0	517.73	1	1	47.5395	27.7857
DATA	1120	14	15	0	0	A_42_P837533	NM_001134546	10257.1	287.222	5.785638e+003	5.785717e+002	5619	28	5.721384e+000	0	0	0	0	0	0	5629.47	1	1	45.4864	27.6486
DATA	1121	14	16	0	0	A_42_P744291	NM_001025729	10282.6	287.232	1.660672e+003	1.660945e+002	1637.5	28	7.262156e+000	0	0	0	0	0	0	1619.4	1	1	46.8651	28.1034
DATA	1122	14	17	0	0	A_44_P149267	NM_001013099	10308	286.545	2.108517e+001	3.672820e+000	80.5	28.5	7.135201e+000	0	0	0	0	0	0	20.5997	1	1	55.8519	28.1842
DATA	1123	14	18	0	0	A_64_P002546	NM_144741	10333.5	286.648	3.013762e+000	3.010421e+000	63	27	5.638262e+000	0	0	0	0	0	0	2.1979	0	0	57.5363	27.04
DATA	1124	14	19	0	0	A_42_P808236	NM_001107189	10358.4	286.761	5.999578e+001	6.706736e+000	117.5	26.5	6.959654e+000	0	0	0	1	0	0	58.8044	1	1	46.5243	26.6667
DATA	1125	14	20	0	0	A_44_P425848	NM_001108747	10384.2	286.785	3.665725e+002	3.677929e+001	417.5	23	5.160333e+000	0	0	0	0	0	0	359.761	1	1	45.835	23.125
DATA	1126	14	21	0	0	A_43_P17405	TC612613	10409.3	286.986	1.609580e+002	1.637124e+001	216	27.5	5.781560e+000	0	0	0	0	0	0	158.137	1	1	47.2035	27.7667
DATA	1127	14	22	0	0	A_64_P022402	NM_001142304	10435	287	6.384121e+000	3.055356e+000	67	28	8.350791e+000	0	0	0	0	0	0	6.27755	1	0	54.9904	29.4167
DATA	1128	14	23	0	0	A_44_P1019726	ENSRNOT00000025138	10460.4	286.986	1.730188e+002	1.755766e+001	230	26	8.734837e+000	0	0	0	0	0	0	170.236	1	1	48.2044	28.6563
DATA	1129	14	24	0	0	A_44_P128186	NM_053305	10485.4	287.015	1.421901e+002	1.452892e+001	200	25	5.200733e+000	0	0	0	0	0	0	139.96	1	1	47.5395	26
DATA	1130	14	25	0	0	A_44_P203665	NM_001105725	10510.9	286.889	1.187268e+002	1.224200e+001	178.5	26.5	4.522889e+000	0	0	0	0	0	0	116.886	1	1	45.4864	27.75
DATA	1131	14	26	0	0	A_42_P688802	DV723748	10536.2	286.897	3.185508e+003	3.185648e+002	3035	29	8.023076e+000	0	0	0	0	0	0	3136.1	1	1	46.5243	29.4286
DATA	1132	14	27	0	0	A_64_P129943	NM_001105712	10561.6	286.843	3.903479e+002	3.914876e+001	445.5	27	7.512999e+000	0	0	0	0	0	0	384.208	1	1	47.5395	28.3871
DATA	1133	14	28	0	0	A_64_P017577	NM_001106982	10587.5	287	1.550009e+001	3.364524e+000	77.5	30.5	1.072911e+001	0	0	0	0	0	0	15.25	1	1	65	32.9231
DATA	1134	14	29	0	0	A_44_P235926	NM_024138	10612.3	287.083	3.070395e+002	3.084900e+001	364.5	30	8.912308e+000	0	0	0	0	0	0	301.906	1	1	47.8731	31.5106
DATA	1135	14	30	0	0	A_42_P611638	NM_001034137	10637.8	287.216	1.025815e+003	1.026251e+002	989	30.5	8.586950e+000	0	0	0	0	0	0	1007.85	1	1	47.8731	31.4167
DATA	1136	14	31	0	0	A_42_P654878	NM_001107919	10663.5	287	2.012669e+003	2.012892e+002	2028	29	7.909407e+000	0	0	0	0	0	0	1975.35	1	1	54.1152	29.0606
DATA	1137	14	32	0	0	A_64_P017464	NM_001135687	10688.9	287.065	4.355419e+001	5.799296e+000	85	36	7.951466e+000	0	0	0	0	0	0	42.6953	1	1	54.4085	34
DATA	1138	14	33	0	0	A_64_P152873	NM_001207022	10714.5	287	6.933667e+001	7.555397e+000	126	33	7.556098e+000	0	0	0	0	0	0	67.8734	1	1	54.1152	32.8065
DATA	1139	14	34	0	0	A_64_P013243	A_64_P013243	10739.3	286.986	7.107048e+003	7.107111e+002	6746	35	6.356555e+000	0	0	0	0	0	0	6946.33	1	1	47.2035	34.8333
DATA	1140	14	35	0	0	A_64_P029720	NM_001109405	10764.9	287.014	2.451665e+002	2.470090e+001	293	35	9.843272e+000	0	0	0	0	0	0	239.199	1	1	46.8651	33.84
DATA	1141	14	36	0	0	A_43_P13459	NM_001107548	10790.3	286.943	2.014629e+002	2.037097e+001	256	33	6.973797e+000	0	0	0	0	0	0	196.177	1	1	46.8651	32.9231
DATA	1142	14	37	0	0	A_64_P053923	NM_001107323	10815.6	287.092	1.577517e+003	1.577806e+002	1556	31	7.403637e+000	0	0	0	0	0	0	1532.92	1	1	49.1849	32.4231
DATA	1143	14	38	0	0	A_44_P1005199	ENSRNOT00000032786	10841.1	286.806	3.779096e+001	4.844165e+000	95	30	6.704622e+000	0	0	0	0	0	0	36.6371	1	1	45.1352	28.7838
DATA	1144	14	39	0	0	A_44_P104821	NM_024369	10866.8	286.948	2.472757e+002	2.491350e+001	299	27.5	6.486260e+000	0	0	0	0	0	0	239.137	1	1	43.3362	27.8438
DATA	1145	14	40	0	0	A_64_P009956	A_64_P009956	10892.1	287.386	4.445789e+002	4.456210e+001	477	28	6.469710e+000	0	0	0	0	0	0	428.851	1	1	57.259	26.1667
DATA	1146	14	41	0	0	A_64_P060947	NM_203334	10917.5	287.352	3.395311e+001	4.566920e+000	94	25.5	6.767859e+000	0	0	0	0	0	0	32.6609	1	1	57.5363	25.1176
DATA	1147	14	42	0	0	A_64_P103419	NM_001106291	10942.9	286.873	4.692758e+000	3.099200e+000	67	28	6.528679e+000	0	0	0	0	0	0	4.50062	1	0	46.8651	28.9032
DATA	1148	14	43	0	0	A_44_P220827	NM_001012051	10968.3	286.758	8.561605e+002	8.567118e+001	858	31	9.013968e+000	0	0	0	0	0	0	818.566	1	1	45.4864	32.4194
DATA	1149	14	44	0	1	ETG07_105829	ETG07_105829	10993.6	287.427	3.094646e+000	3.086391e+000	62	32	8.420740e+000	0	0	0	0	0	0	1.45726	0	0	57.5363	33.1379
DATA	1150	14	45	0	0	A_42_P719478	NM_001191779	11019	287.455	2.592055e+001	4.035541e+000	89	30.5	9.119527e+000	0	0	0	0	0	0	24.6217	1	1	55.8519	32.4706
DATA	1151	14	46	0	0	A_42_P462257	NM_001109481	11044.4	287.295	1.297044e+004	1.297048e+003	12287	31	1.097044e+001	0	0	0	0	0	0	12276.9	1	1	50.4627	35.1667
DATA	1152	14	47	0	0	A_44_P105634	NM_001007658	11069.7	287.247	2.581105e+002	2.599837e+001	305	32	7.212810e+000	0	0	0	0	0	0	243.42	1	1	48.2044	31.1034
DATA	1153	14	48	0	0	A_64_P100594	NM_001000360	11095	287.338	6.177672e+001	6.924047e+000	117	30.5	8.240820e+000	0	0	0	0	0	0	58.0416	1	1	47.2035	30.5556
DATA	1154	14	49	0	0	A_64_P004266	A_64_P004266	11120.5	287.186	1.532299e+001	3.493479e+000	77	29	6.253669e+000	0	0	0	0	0	0	14.3397	1	0	47.5395	28.5862
DATA	1155	14	50	0	0	A_44_P156343	NM_001000102	11146	287.455	7.925397e+000	3.250218e+000	70	31	7.486831e+000	0	0	0	0	0	0	7.38715	1	0	55.8519	32
DATA	1156	14	51	0	0	A_42_P504358	NM_001108674	11171.5	287.5	2.651309e+002	2.670137e+001	307	34.5	9.345850e+000	0	0	0	1	0	0	246.097	1	1	49.1849	34.4412
DATA	1157	14	52	0	0	A_44_P281468	NM_001127556	11196.7	287.254	1.702498e+001	3.606058e+000	79	32	1.144262e+001	0	0	0	0	0	0	15.7352	1	1	47.2035	33.1724
DATA	1158	14	53	0	0	A_43_P12785	NM_053364	11222.4	287.431	3.205379e+000	3.194617e+000	64	30	4.239091e+000	0	0	0	0	0	0	0.962702	0	0	45.1352	29.3548
DATA	1159	14	54	0	0	A_64_P053297	NM_001107278	11247.2	287.478	2.827088e+003	2.827270e+002	2614	31	8.122112e+000	0	0	0	0	0	0	2590.07	1	1	53.5237	30.6316
DATA	1160	14	55	0	0	A_64_P062986	NM_001001018	11272.9	287.5	1.371570e+001	3.501583e+000	74.5	31	6.191806e+000	0	0	0	0	0	0	12.5078	1	0	56.9804	30.5385
DATA	1161	14	56	0	0	A_44_P529226	NM_023091	11298.5	287.5	3.249677e+000	3.245419e+000	65	33.5	8.582891e+000	0	0	0	0	0	0	2.11663	0	0	57.5363	34.225
DATA	1162	14	57	0	0	A_42_P559737	NM_020074	11323.6	287.137	1.501735e+003	1.502088e+002	1408	33.5	1.075461e+001	0	0	0	0	0	0	1356.51	1	1	48.5334	33.3077
DATA	1163	14	58	0	0	A_44_P1017458	NM_199402	11349.3	287.5	1.469229e+002	1.505144e+001	194.5	33	9.307069e+000	0	0	0	0	0	0	132.073	1	1	57.5363	34.3077
DATA	1164	14	59	0	0	A_44_P407750	NM_001127680	11374	287.229	1.403485e+003	1.403869e+002	1273	28	7.511568e+000	0	0	0	0	0	0	1255.52	1	1	46.8651	30.0968
DATA	1165	14	60	0	0	A_64_P033872	NM_001037353	11399.9	287.5	6.313786e+001	7.124608e+000	119	27	6.988008e+000	0	0	0	0	0	0	56.1967	1	1	56.9804	28.9677
DATA	1166	14	61	0	0	A_42_P472699	NM_001108061	11425.4	287.573	8.365645e+001	8.999544e+000	133	27	7.625838e+000	0	0	0	0	0	0	74.081	1	1	57.5363	29.1818
DATA	1167	14	62	0	0	A_44_P201215	ENSRNOT00000014231	11450.9	288.2	3.360803e+001	4.734365e+000	91.5	25	6.840424e+000	0	0	0	0	0	0	29.6117	1	1	44.7812	26.4839
DATA	1168	14	63	0	0	A_64_P129910	NM_001107648	11475.6	287.753	4.175361e+002	4.188793e+001	435.5	27	6.599041e+000	0	0	0	0	0	0	365.991	1	1	49.8279	28.2121
DATA	1169	14	64	0	0	A_64_P027927	NM_022255	11501.5	287.709	2.500364e+002	2.522971e+001	272	29.5	7.085273e+000	0	0	0	0	0	0	217.994	1	1	50.7771	28.875
DATA	1170	14	65	0	0	A_64_P101623	A_64_P101623	11526.6	287.523	3.041334e+004	3.041336e+003	26284	32	6.775333e+000	0	0	0	0	0	0	26376.1	1	1	52.9257	31.2174
DATA	1171	14	66	0	0	A_42_P645110	NM_001029919	11552.1	287.608	2.748372e+004	2.748374e+003	23131.5	27	8.097315e+000	0	0	0	0	0	0	23708.3	1	1	49.1849	27.931
DATA	1172	14	67	0	0	A_64_P017781	NM_001010956	11577.4	287.521	1.564083e+002	1.601130e+001	194	31.5	8.590129e+000	0	0	0	0	0	0	134.195	1	1	48.2044	33.375
DATA	1173	14	68	0	0	A_64_P057106	NM_001004087	11603	287.545	1.806496e+002	1.839015e+001	219	32	8.308726e+000	0	0	0	0	0	0	154.151	1	1	55.8519	32.2222
DATA	1174	14	69	0	0	A_44_P187005	NM_022238	11628	287.58	8.623185e+001	9.292027e+000	135	26	7.278928e+000	0	0	0	0	0	0	73.1901	1	1	46.8651	27.129
DATA	1175	14	70	0	0	A_42_P779933	NM_017117	11653.6	287.573	3.360240e+001	4.838039e+000	93	31	7.295053e+000	0	0	0	0	0	0	28.3634	1	1	57.5363	30.0303
DATA	1176	14	71	0	0	A_42_P555701	NM_001107554	11679	287.716	8.406512e+003	8.406584e+002	7027	33.5	8.828345e+000	0	0	0	0	0	0	7057.25	1	1	49.1849	33.0556
DATA	1177	14	72	0	0	A_42_P705302	NM_001107361	11704.3	287.662	7.266842e+003	7.266927e+002	5868.5	33.5	1.124787e+001	0	0	0	0	0	0	6067.12	1	1	48.5334	33.9167
DATA	1178	14	73	0	0	A_64_P015435	A_64_P015435	11729.5	287.618	2.854647e+004	2.854649e+003	23647	26	1.009348e+001	0	0	0	0	0	0	23703.6	1	1	47.2035	27.7857
DATA	1179	14	74	0	0	A_64_P036217	NM_001000569	11755.6	287.684	6.892530e+001	7.756811e+000	120	27.5	5.823075e+000	0	0	0	0	0	0	56.9114	1	1	49.5074	26.9706
DATA	1180	14	75	0	0	A_44_P543511	NM_001024749	11780.8	287.629	1.631073e+003	1.631465e+002	1430	30	8.368808e+000	0	0	0	0	0	0	1339.45	1	1	44.0646	30.5862
DATA	1181	14	76	0	0	A_42_P759043	NM_001134509	11805.7	287.676	6.986901e+002	6.996153e+001	602	32	9.208183e+000	0	0	0	0	0	0	570.719	1	1	48.2044	31.8276
DATA	1182	14	77	0	0	A_42_P679982	NM_001107835	11831.3	287.747	4.955209e+003	4.955341e+002	3905	32	6.802963e+000	0	0	0	0	0	0	4025.51	1	1	49.1849	32.697
DATA	1183	14	78	0	0	A_43_P18064	NM_001106904	11857	287.867	3.780993e+001	7.068201e+000	84	33	7.049070e+000	0	0	0	0	0	0	30.5494	1	1	54.4085	33.4242
DATA	1184	14	79	0	0	A_64_P092143	NM_001129879	11882.2	287.806	3.564156e+003	3.564343e+002	2863	30	6.444551e+000	0	0	0	0	0	0	2864.37	1	1	47.5395	29.3409
DATA	1185	14	80	0	0	A_64_P102886	A_64_P102886	11907.9	287.776	1.421786e+001	3.941044e+000	73.5	31	7.977267e+000	0	0	0	0	0	0	11.3647	1	0	45.835	31.4667
DATA	1186	14	81	66	1	DarkCorner	DarkCorner	11933.1	287.74	3.709385e+000	3.694948e+000	56.5	29	7.636327e+000	0	0	0	0	0	0	-6.93977	0	0	47.5395	29.0278
DATA	1187	14	82	66	1	DarkCorner	DarkCorner	11958.1	287.464	3.728892e+000	3.714378e+000	56.5	31	8.812329e+000	0	0	0	0	0	0	-6.90694	0	0	46.5243	32.6667
DATA	1188	14	83	66	1	DarkCorner	DarkCorner	11984.1	288.011	3.748039e+000	3.733451e+000	55	30	8.575188e+000	0	0	0	0	0	0	-7.12653	0	0	51.4001	30.5769
DATA	1189	14	84	66	1	DarkCorner	DarkCorner	12009.5	287.782	3.767439e+000	3.752776e+000	60	27.5	5.766748e+000	0	0	0	0	0	0	-3.58764	0	0	49.1849	28.1538
DATA	1190	14	85	66	1	DarkCorner	DarkCorner	12034.5	288	3.785829e+000	3.771094e+000	61	31	8.123722e+000	0	0	0	0	0	0	-0.955431	0	0	54.1152	31.8406
DATA	1191	15	1	66	1	DarkCorner	DarkCorner	9888.66	293.608	3.210908e+000	3.198492e+000	61	25	6.810477e+000	0	0	0	0	0	0	0.209487	0	0	50.7771	25.5038
DATA	1192	15	2	66	1	DarkCorner	DarkCorner	9914.7	293.727	3.192200e+000	3.179776e+000	59	26	6.184969e+000	0	0	0	0	0	0	-0.731873	0	0	49.8279	26.95
DATA	1193	15	3	66	1	DarkCorner	DarkCorner	9939.85	293.577	3.175180e+000	3.162822e+000	55.5	27	6.136459e+000	0	0	0	0	0	0	-5.27091	0	0	50.1463	26.2609
DATA	1194	15	4	66	1	DarkCorner	DarkCorner	9965.02	293.7	3.158855e+000	3.146561e+000	48	27	8.014038e+000	0	0	0	0	0	0	-9.74914	0	0	50.1463	28.0313
DATA	1195	15	5	66	1	DarkCorner	DarkCorner	9990.5	293.648	3.143297e+000	3.131063e+000	54	28.5	6.960489e+000	0	0	0	0	0	0	-5.65664	0	0	57.5363	29.1786
DATA	1196	15	6	0	0	A_44_P451392	NM_001108023	10015.7	294.147	5.782682e+002	5.791072e+001	594	28	5.898013e+000	0	0	0	0	0	0	545.194	1	1	48.5334	28.8261
DATA	1197	15	7	0	0	A_64_P012661	ENSRNOT00000010298	10040.9	294.082	1.415638e+003	1.415978e+002	1404	24	7.396326e+000	0	0	0	0	0	0	1340.54	1	1	51.0895	26.0625
DATA	1198	15	8	0	0	A_42_P546058	NM_053670	10066.3	294.219	3.373641e+003	3.373783e+002	3080	28.5	7.112007e+000	0	0	0	0	0	0	3208.15	1	1	48.2044	28
DATA	1199	15	9	0	0	A_42_P695401	NM_031530	10092.4	293.931	5.564689e+001	6.358851e+000	112	32	7.078205e+000	0	0	0	0	0	0	53.1302	1	1	53.8203	29.3793
DATA	1200	15	10	0	0	A_44_P192193	A_44_P192193	10117.4	294	1.276939e+002	1.313231e+001	182	26.5	7.317607e+000	0	0	0	0	0	0	122.365	1	1	48.5334	27.4688
DATA	1201	15	11	0	0	A_42_P473886	NM_001165922	10143.1	294.015	4.392259e+002	4.402872e+001	473	27	9.412300e+000	0	0	0	0	0	0	422.376	1	1	46.8651	29.4839
DATA	1202	15	12	0	0	A_42_P576953	NM_138882	10168.1	294	6.701246e+002	6.708163e+001	704.5	30	7.631917e+000	0	0	0	1	0	0	646.47	1	1	48.5334	29.3846
DATA	1203	15	13	0	0	A_44_P260227	ENSRNOT00000036745	10193.4	294.155	5.063733e+001	5.904342e+000	107	27.5	5.625884e+000	0	0	0	0	0	0	48.9966	1	1	47.5395	29.0667
DATA	1204	15	14	0	0	A_44_P276435	NM_053853	10219	294.243	1.740039e+002	1.766189e+001	229	28	5.746995e+000	0	0	0	0	0	0	168.837	1	1	47.8731	28.8065
DATA	1205	15	15	0	0	A_43_P19066	NM_001017494	10244.6	294.192	1.552729e+002	1.581831e+001	213	30	5.078311e+000	0	0	0	0	0	0	151.044	1	1	48.2044	28.5484
DATA	1206	15	16	0	0	A_64_P113200	ENSRNOT00000061930	10270	294	4.025246e+001	5.028286e+000	95.5	28	4.989909e+000	0	0	0	0	0	0	39.2448	1	1	54.9904	27.4375
DATA	1207	15	17	0	0	A_42_P480108	NM_001007637	10295	294	1.134492e+003	1.134890e+002	1153	28	6.045498e+000	0	0	0	0	0	0	1108.34	1	1	46.8651	28.7027
DATA	1209	15	19	0	0	A_44_P420046	NM_021669	10346	294.159	7.431681e+001	8.013215e+000	134	26	7.678642e+000	0	0	0	0	0	0	72.8558	1	1	46.8651	28.1923
DATA	1210	15	20	0	0	A_64_P077021	A_64_P077021	10371.2	294.412	1.675096e+001	3.429642e+000	78	23.5	6.316770e+000	0	0	0	0	0	0	16.4448	1	1	46.1809	23.3889
DATA	1211	15	21	0	0	A_44_P292558	NM_213559	10396.4	294.127	2.838449e+002	2.854148e+001	343	26	5.949523e+000	0	0	0	0	0	0	278.968	1	1	47.5395	26.2857
DATA	1212	15	22	0	0	A_42_P471653	NM_001031654	10422.1	294.176	8.073817e+000	3.093735e+000	69.5	27	6.492012e+000	0	0	0	0	0	0	7.94274	1	0	47.5395	27.1714
DATA	1213	15	23	0	0	A_43_P12000	NM_019272	10447.3	294.353	4.742545e+002	4.751925e+001	518	26.5	9.037060e+000	0	0	0	0	0	0	466.902	1	1	46.1809	28.7059
DATA	1214	15	24	0	0	A_64_P131395	NM_001037523	10472.7	294	6.433587e+000	3.051490e+000	68	29.5	7.021038e+000	0	0	0	0	0	0	6.33683	1	0	49.1849	29.5357
DATA	1215	15	25	0	0	A_42_P682853	NM_017193	10498.5	294	4.919279e+002	4.928309e+001	536	25	5.605872e+000	0	0	0	0	0	0	484.678	1	1	54.1152	26.3226
DATA	1216	15	26	0	0	A_42_P647505	TC640289	10523.6	294.213	2.879518e+003	2.879672e+002	2805	28	4.676894e+000	0	0	0	0	0	0	2837.41	1	1	49.1849	27.96
DATA	1217	15	27	0	0	A_44_P682959	NM_001025139	10549.4	294.427	3.903372e+000	3.007358e+000	65	29	8.285217e+000	0	0	0	0	0	0	3.84593	1	0	57.5363	30.9
DATA	1218	15	28	0	0	A_64_P249426	NM_001014271	10574.6	294.427	1.746340e+001	3.456470e+000	78.5	31	1.116664e+001	0	0	0	0	0	0	17.201	1	1	65	34.2083
DATA	1219	15	29	0	0	A_64_P133430	NM_001044282	10599.4	294.378	2.196711e+004	2.196713e+003	21200	34.5	1.283767e+001	0	0	0	0	0	0	21625.9	1	1	49.1849	35.5667
DATA	1220	15	30	0	0	A_42_P635611	NM_001025685	10626.1	295.679	1.064508e+002	1.105599e+001	168	31	6.825705e+000	0	0	0	1	0	0	104.734	1	1	41.0736	30.0698
DATA	1221	15	31	0	0	A_42_P592013	NM_001127600	10650.5	294.5	2.241487e+003	2.241686e+002	2234	26	5.436604e+000	0	0	0	0	0	0	2203.1	1	1	49.1849	26.16
DATA	1222	15	32	0	1	ETG02_36680	ETG02_36680	10676.4	294.427	1.293447e+002	1.449621e+001	167	30	8.709756e+000	0	0	0	1	0	0	126.985	1	1	65	31.7879
DATA	1223	15	33	0	0	A_42_P608478	NM_001025131	10701.6	294.427	1.069236e+002	1.412773e+001	117	33	7.522189e+000	0	0	0	1	0	0	104.839	1	1	57.5363	31.6
DATA	1224	15	34	0	0	A_44_P137397	NM_017236	10727	294.455	1.007886e+005	1.007886e+004	98554.5	33	8.821604e+000	0	0	0	0	0	0	98677.4	1	1	55.8519	33.8
DATA	1226	15	36	0	0	A_64_P110789	A_64_P110789	10777.6	294.427	7.948029e+000	3.114511e+000	67	35.5	9.456878e+000	0	0	0	0	0	0	7.75443	1	0	65	34.3929
DATA	1227	15	37	0	0	A_64_P061562	A_64_P061562	10802.8	294.481	1.497583e+003	1.497887e+002	1442	36	7.712297e+000	0	0	0	0	0	0	1458.2	1	1	51.0895	34.4211
DATA	1228	15	38	0	0	A_44_P511359	NM_001108736	10827.7	294.446	5.224598e+002	5.233341e+001	556	32	7.826829e+000	0	0	0	0	0	0	507.629	1	1	48.5334	32
DATA	1229	15	39	0	0	A_42_P658220	NM_001109598	10853.4	294.36	2.048246e+003	2.048470e+002	2033.5	30	6.280923e+000	0	0	0	0	0	0	1985.35	1	1	48.8603	28.5833
DATA	1230	15	40	0	0	A_42_P479096	NM_001008293	10878.9	294.654	1.052794e+003	1.053233e+002	1062.5	27	6.629755e+000	0	0	0	1	0	0	1017.92	1	1	49.8279	26.5294
DATA	1231	15	41	0	0	A_64_P275280	NM_001109569	10904.4	294.36	5.656909e+003	5.656991e+002	5558	25	6.834707e+000	0	0	0	0	0	0	5454.65	1	1	48.8603	24.1892
DATA	1232	15	42	0	0	A_42_P785926	NM_001108289	10929.5	294.386	1.124998e+003	1.125413e+002	1125	28	6.520110e+000	0	0	0	0	0	0	1081.73	1	1	47.5395	28.6129
DATA	1233	15	43	0	0	A_64_P005238	A_64_P005238	10955.5	294.5	4.581639e+001	5.512241e+000	104	29	6.805222e+000	0	0	0	0	0	0	43.9205	1	1	57.5363	28.8529
DATA	1234	15	44	0	0	A_42_P555753	NM_001106401	10980.7	294.697	3.908174e+003	3.908295e+002	3529.5	31	7.281463e+000	0	0	0	0	0	0	3734.87	1	1	49.5074	32.6552
DATA	1235	15	45	0	0	A_42_P469751	XM_001054007	11005.8	294.62	2.667731e+002	2.685502e+001	310	32	9.147571e+000	0	0	0	0	0	0	254.116	1	1	47.5395	32.7037
DATA	1236	15	46	0	0	A_44_P506124	XM_222590	11031.6	294.646	3.966757e+003	3.966877e+002	3860.5	31	1.109713e+001	0	0	0	0	0	0	3765.4	1	1	45.1352	33.2903
DATA	1237	15	47	0	0	A_44_P441947	XM_001079870	11057.1	294.5	1.042971e+003	1.043434e+002	1043	31	8.128008e+000	0	0	0	0	0	0	986.468	1	1	56.9804	32.75
DATA	1238	15	48	0	0	A_64_P127659	NM_001106228	11082.6	294.605	5.038156e+003	5.038253e+002	4594	30.5	8.793097e+000	0	0	0	0	0	0	4747.63	1	1	49.5074	31.3125
DATA	1239	15	49	0	0	A_42_P733076	NM_001033867	11107.9	294.5	3.383656e+002	3.398101e+001	368.5	32	8.564591e+000	0	0	0	0	0	0	317.633	1	1	65	32.069
DATA	1240	15	50	0	0	A_64_P145939	NM_001109499	11133.2	294.361	5.954407e+001	6.732652e+000	118	27.5	6.398599e+000	0	0	0	0	0	0	55.6746	1	1	47.8731	28.0278
DATA	1241	15	51	0	0	A_44_P1040796	NM_001106660	11158.7	294.556	1.227468e+004	1.227472e+003	11436	33	7.389248e+000	0	0	0	0	0	0	11430.4	1	1	48.5334	33.6207
DATA	1242	15	52	0	0	A_42_P588072	NM_001106829	11184.1	294.5	3.956988e+001	5.069127e+000	101	32	1.043620e+001	0	0	0	0	0	0	36.6937	1	1	56.9804	33
DATA	1243	15	53	0	0	A_64_P045823	ENSRNOT00000023172	11209.5	294.5	1.913437e+002	1.939715e+001	241	31	9.227122e+000	0	0	0	0	0	0	176.674	1	1	57.5363	31.1613
DATA	1244	15	54	0	0	A_42_P591344	NM_001037780	11234.7	294.5	3.660300e+002	3.674225e+001	395	30	7.244278e+000	0	0	0	0	0	0	336.494	1	1	57.5363	29.2903
DATA	1245	15	55	0	0	A_64_P120322	A_64_P120322	11260.4	294.884	1.051933e+001	3.378300e+000	71	31	9.831343e+000	0	0	0	0	0	0	9.62705	1	0	46.5243	31.303
DATA	1246	15	56	0	0	A_64_P062665	NM_001170470	11284.9	294.768	5.371733e+002	5.381404e+001	513.5	32	7.884460e+000	0	0	0	0	0	0	489.412	1	1	46.5243	33.2
DATA	1247	15	57	0	0	A_44_P398300	NM_001005538	11310.6	294.648	2.597122e+003	2.597324e+002	2277.5	34.5	9.075790e+000	0	0	0	0	0	0	2354.93	1	1	48.2044	34.2188
DATA	1248	15	58	0	0	A_64_P001545	ENSRNOT00000029141	11336.4	294.573	4.450994e+004	4.450995e+003	39340	31	9.175429e+000	0	0	0	0	0	0	40163	1	1	57.5363	31.8667
DATA	1249	15	59	0	0	A_44_P1010653	NM_001109021	11361.6	294.873	5.147461e+003	5.147565e+002	4641	31	7.117444e+000	0	0	0	0	0	0	4622.6	1	1	47.5395	29.9091
DATA	1250	15	60	0	0	A_44_P398969	NM_001013225	11386.6	294.64	7.802305e+002	7.809228e+001	728	31	7.781868e+000	0	0	0	0	0	0	697.239	1	1	48.8603	30.8333
DATA	1251	15	61	0	0	A_64_P059495	NM_001109986	11412.6	294.573	3.692196e+003	3.692344e+002	3283	28	7.415177e+000	0	0	0	0	0	0	3282.54	1	1	57.5363	29.7879
DATA	1252	15	62	0	0	A_64_P037040	A_64_P037040	11437.8	294.781	2.944386e+002	2.963059e+001	322	24.5	3.806695e+000	0	0	0	0	0	0	260.461	1	1	48.2044	25.3438
DATA	1253	15	63	0	0	A_64_P051446	NM_001142942	11463.1	295.132	6.999763e+003	6.999842e+002	6046	29	7.536120e+000	0	0	0	0	0	0	6160.78	1	1	46.8651	28.3103
DATA	1254	15	64	0	0	A_42_P701756	NM_001107646	11488.7	294.9	2.372067e+003	2.372304e+002	2074.5	29	6.824687e+000	0	0	0	1	0	0	2076.73	1	1	47.2035	29.1724
DATA	1255	15	65	0	0	A_44_P172604	NM_031795	11514.4	294.573	2.684229e+003	2.684441e+002	2324	32	8.746449e+001	0	0	1	0	1	0	2337.39	1	1	57.5363	71.3182
DATA	1256	15	66	0	0	A_64_P152000	A_64_P152000	11539.6	294.924	3.459516e+000	3.409142e+000	67	28	8.048316e+000	0	0	0	0	0	0	2.99692	1	0	49.5074	29.8462
DATA	1257	15	67	0	0	A_44_P339008	NM_001024975	11564.6	294.722	1.305386e+003	1.305832e+002	1181.5	31.5	8.366359e+000	0	0	0	0	0	0	1124.85	1	1	47.5395	31.9375
DATA	1258	15	68	0	0	A_44_P560070	A_44_P560070	11590.5	295	5.122731e+000	3.466161e+000	66.5	30	7.867281e+000	0	0	0	0	0	0	4.39042	1	0	54.1152	31.6
DATA	1259	15	69	0	0	A_44_P520509	NM_001033868	11616	295	5.172172e+003	5.172287e+002	4376	28	9.013805e+000	0	0	0	0	0	0	4408.81	1	1	51.4001	29.7143
DATA	1260	15	70	0	0	A_42_P643349	NM_001109495	11640.7	294.905	6.193604e+001	7.097004e+000	115	31	8.324081e+000	0	0	0	0	0	0	52.5156	1	1	48.8603	30.75
DATA	1261	15	71	0	0	A_44_P215075	NM_012667	11666.2	294.897	3.100507e+002	3.120020e+001	316	31	7.537017e+000	0	0	0	0	0	0	261.462	1	1	46.5243	30.7857
DATA	1262	15	72	0	0	A_44_P560363	ENSRNOT00000049736	11691.8	295	2.169896e+003	2.170179e+002	1876	36	9.671832e+000	0	0	0	0	0	0	1819.85	1	1	46.1809	34.5172
DATA	1263	15	73	0	0	A_44_P553158	NM_001014014	11716.9	294.9	1.613159e+003	1.613543e+002	1362	35	1.007129e+001	0	0	0	0	0	0	1345.62	1	1	46.8651	33.6087
DATA	1264	15	74	0	0	A_64_P165277	NM_001106370	11742.5	295	2.882717e+001	4.566469e+000	82	26.5	7.400920e+000	0	0	0	0	0	0	23.9148	1	1	54.1152	26.8824
DATA	1265	15	75	0	0	A_64_P138187	A_64_P138187	11767.9	295.104	8.089507e+002	8.097340e+001	739	25.5	5.530744e+000	0	0	0	0	0	0	667.467	1	1	46.8651	26.6765
DATA	1266	15	76	0	0	A_44_P429041	XM_227654	11793.1	294.942	2.866663e+002	2.888934e+001	299.5	29.5	8.093988e+000	0	0	0	0	0	0	235.249	1	1	46.8651	28.2667
DATA	1267	15	77	0	0	A_44_P465880	NM_199389	11818.5	295	3.963645e+003	3.963808e+002	3194	32	5.869853e+000	0	0	0	0	0	0	3235.17	1	1	48.5334	31.6
DATA	1268	15	78	0	0	A_44_P381740	NM_001000239	11844.2	295.068	1.887078e+001	4.081654e+000	75.5	32	7.457406e+000	0	0	0	0	0	0	15.319	1	1	47.5395	32.75
DATA	1269	15	79	0	0	A_64_P045211	NM_001191733	11869.5	295	3.652877e+000	3.314123e+000	67	32	7.893940e+000	0	0	0	0	0	0	2.16212	0	0	65	32.4571
DATA	1270	15	80	0	0	A_64_P010896	A_64_P010896	11895.1	295.065	6.715307e+000	3.719268e+000	67	30	7.222711e+000	0	0	0	0	0	0	5.3934	1	0	54.4085	28.8824
DATA	1271	15	81	0	0	A_42_P566906	NM_001006966	11919.9	294.9	3.314120e+003	3.314324e+002	2548	30	8.380628e+000	0	0	0	0	0	0	2647.96	1	1	46.8651	30.7778
DATA	1272	15	82	66	1	DarkCorner	DarkCorner	11945.8	295.215	3.710890e+000	3.696447e+000	59	31	7.617097e+000	0	0	0	0	0	0	-3.19649	0	0	45.1352	30.5429
DATA	1273	15	83	66	1	DarkCorner	DarkCorner	11971.4	295.133	3.730340e+000	3.715822e+000	57.5	32	8.749121e+000	0	0	0	0	0	0	-5.61103	0	0	48.8603	32.2667
DATA	1274	15	84	66	1	DarkCorner	DarkCorner	11996.6	295.3	3.749096e+000	3.734504e+000	58	30.5	7.572140e+000	0	0	0	0	0	0	-5.5872	0	0	47.5395	30.1786
DATA	1275	15	85	66	1	DarkCorner	DarkCorner	12022.1	295.013	3.768370e+000	3.753703e+000	56	29	1.573828e+001	0	0	0	0	0	0	-6.20738	0	0	48.2044	34.9412
DATA	1276	16	1	66	1	DarkCorner	DarkCorner	9901.58	301.427	3.197182e+000	3.184738e+000	57.5	26	5.524736e+000	0	0	0	0	0	0	-0.575751	0	0	57.5363	27.0741
DATA	1277	16	2	66	1	DarkCorner	DarkCorner	9927.26	300.986	3.179633e+000	3.167258e+000	56	28	6.485368e+000	0	0	0	0	0	0	-3.36414	0	0	47.5395	26.68
DATA	1278	16	3	66	1	DarkCorner	DarkCorner	9952.47	301.115	3.162976e+000	3.150666e+000	51	29	8.670553e+000	0	0	0	0	0	0	-7.30129	0	0	50.1463	29.3871
DATA	1279	16	4	66	1	DarkCorner	DarkCorner	9978.23	301.354	3.146792e+000	3.134545e+000	57	28	7.712793e+000	0	0	0	0	0	0	-3.05956	0	0	50.4627	28.8889
DATA	1280	16	5	0	0	A_42_P708614	NM_001130505	10003.4	301.427	4.523055e+004	4.523056e+003	42067	28	5.519058e+000	0	0	0	0	0	0	42596.7	1	1	57.5363	29.72
DATA	1281	16	6	0	0	A_44_P427177	NM_053923	10028.2	301.338	3.118097e+000	3.116119e+000	61.5	27.5	5.290503e+000	0	0	0	0	0	0	2.37812	0	0	47.5395	26.7143
DATA	1282	16	7	0	0	A_44_P417051	NM_001024886	10054	301.455	5.686911e+001	6.473333e+000	114.5	28	7.382540e+000	0	0	0	0	0	0	54.03	1	1	65	28.4242
DATA	1283	16	8	0	0	A_64_P052917	ENSRNOT00000029053	10079.1	301.137	3.266764e+001	4.489925e+000	91	31	5.237720e+000	0	0	0	0	0	0	31.1598	1	1	47.5395	30.6061
DATA	1284	16	9	0	0	A_42_P689013	NM_053800	10104.6	301.027	1.746908e+004	1.746910e+003	16295	30	7.472171e+000	0	0	0	0	0	0	16726.1	1	1	48.5334	27.2
DATA	1285	16	10	0	0	A_42_P668072	NM_013130	10130.2	301.286	2.392317e+002	2.411775e+001	281	28	5.760264e+000	0	0	0	0	0	0	229.89	1	1	49.5074	28.2258
DATA	1286	16	11	0	0	A_44_P762596	XM_237156	10155.8	300.97	2.587835e+002	2.605715e+001	307.5	28	9.489686e+000	0	0	0	0	0	0	249.504	1	1	45.835	30.1481
DATA	1287	16	12	0	0	A_44_P673662	TC577636	10180.8	301.437	4.280296e+001	5.248769e+000	101	27	6.722540e+000	0	0	0	0	0	0	41.3964	1	1	47.5395	28.0313
DATA	1288	16	13	0	0	A_42_P674598	NM_013067	10206.5	301.5	3.479476e+004	3.479478e+003	32400	28	6.150990e+000	0	0	0	0	0	0	33749.1	1	1	57.5363	28.8125
DATA	1289	16	14	0	0	A_44_P529994	NM_001191720	10231.7	301.162	9.186276e+000	3.157903e+000	72	30	8.080415e+000	0	0	0	0	0	0	8.93301	1	0	48.8603	28.6897
DATA	1290	16	15	0	0	A_42_P655644	NM_133618	10256.9	301.507	1.004324e+003	1.004776e+002	1043	26	6.038698e+000	0	0	0	0	0	0	979.001	1	1	48.5334	25.6389
DATA	1291	16	16	0	0	A_42_P589674	NM_001044225	10282.3	301.662	5.530387e+003	5.530469e+002	5373	29	6.265454e+000	0	0	0	0	0	0	5402.71	1	1	48.5334	29.4516
DATA	1292	16	17	0	0	A_64_P010139	A_64_P010139	10307.9	301.5	2.267607e+002	2.287388e+001	282	28	5.900674e+000	0	0	0	0	0	0	221.953	1	1	56.9804	28.55
DATA	1293	16	18	0	0	A_42_P586883	NM_001106416	10333.5	301.5	4.593238e+001	5.484244e+000	106.5	26	6.986161e+000	0	0	0	0	0	0	45.036	1	1	57.5363	28.1613
DATA	1294	16	19	0	0	A_42_P461144	DV724416	10358.6	301.479	1.233195e+003	1.233557e+002	1214	26.5	7.504864e+000	0	0	0	0	0	0	1210.9	1	1	48.2044	26.7667
DATA	1295	16	20	0	0	A_64_P130565	NM_031668	10384.3	301.5	1.900051e+002	1.923406e+001	252	26	4.894754e+000	0	0	0	0	0	0	186.809	1	1	57.5363	24.8
DATA	1296	16	21	0	0	A_64_P002826	NM_001134527	10409.6	301.466	1.531645e+002	1.560466e+001	209	29	8.473808e+000	0	0	0	0	0	0	150.744	1	1	49.1849	28.3448
DATA	1298	16	23	0	0	A_64_P036099	A_64_P036099	10460.2	301.589	2.080680e+003	2.080894e+002	2130	29.5	1.048690e+001	0	0	0	0	0	0	2050.77	1	1	52.6241	31.3947
DATA	1299	16	24	0	0	A_64_P080580	ENSRNOT00000040473	10485.6	301.74	8.259673e+002	8.265045e+001	862	29	6.946499e+000	0	0	0	0	0	0	814.438	1	1	48.5334	28.5769
DATA	1300	16	25	0	0	A_43_P12276	NM_022636	10511.3	301.5	3.764214e+001	4.800472e+000	98	26	7.276786e+000	0	0	0	0	0	0	37.1229	1	1	57.5363	26.125
DATA	1301	16	26	0	0	A_42_P505393	NM_199085	10536.4	301.295	5.578838e+002	5.586788e+001	601	27	8.008060e+000	0	0	0	0	0	0	550.167	1	1	50.4627	29.25
DATA	1302	16	27	0	0	A_44_P883619	ENSRNOT00000032374	10561.9	301.5	2.991466e+000	2.979823e+000	60	30	1.005286e+001	0	0	0	0	0	0	-3.11656	0	0	65	31.5
DATA	1303	16	28	0	0	A_44_P493894	ENSRNOT00000050156	10587.4	301.573	1.613134e+005	1.613134e+004	157231	34	1.257924e+001	0	0	0	0	0	0	158986	1	1	57.5363	35.3478
DATA	1304	16	29	0	0	A_64_P085334	TC585414	10612.4	301.74	9.109072e+003	9.109121e+002	8443.5	33	1.029330e+001	0	0	0	0	0	0	8972.36	1	1	49.5074	34.7838
DATA	1306	16	31	0	0	A_64_P045433	A_64_P045433	10663.5	302.099	3.800738e+003	3.800855e+002	3702	30	8.318395e+000	0	0	0	0	0	0	3737.04	1	1	47.8731	32.0645
DATA	1307	16	32	0	0	A_64_P025351	AY724474	10688.8	301.57	3.699671e+004	3.699672e+003	35955.5	36	8.616818e+000	0	0	0	0	0	0	36331	1	1	58.0869	33.5882
DATA	1308	16	33	0	0	A_44_P501626	ENSRNOT00000050744	10714.4	301.573	1.286815e+002	1.321232e+001	176.5	32	8.033264e+000	0	0	0	0	0	0	126.19	1	1	57.5363	32.1333
DATA	1309	16	34	0	0	A_64_P071525	NM_001000141	10739.6	301.573	3.012404e+000	3.000679e+000	61	33.5	9.187263e+000	0	0	0	0	0	0	-1.0365	0	0	57.5363	33.6667
DATA	1310	16	35	0	0	A_64_P006545	A_64_P006545	10764.6	301.514	1.979109e+004	1.979112e+003	18945	36	1.038567e+001	0	0	0	0	0	0	19344.6	1	1	48.2044	34
DATA	1311	16	36	0	0	A_64_P089561	NM_001044265	10790.5	301.648	6.817893e+001	7.453450e+000	128.5	31	1.013752e+001	0	0	0	0	0	0	66.5117	1	1	57.5363	33.6667
DATA	1312	16	37	0	0	A_44_P791108	NM_001014070	10815.6	301.596	1.263763e+002	1.299299e+001	182	37.5	1.433445e+001	0	0	0	0	0	0	123.03	1	1	57.8122	40.4583
DATA	1313	16	38	0	0	A_44_P161535	A_44_P161535	10841	302	5.587146e+003	5.587227e+002	5808	31	7.237256e+000	0	0	0	0	0	0	5427.23	1	1	46.8651	29.7949
DATA	1314	16	39	0	0	A_44_P299136	NM_001108539	10866.4	302	1.931890e+002	1.955537e+001	248	27	5.227111e+000	0	0	0	0	0	0	187.206	1	1	48.5334	28.0286
DATA	1315	16	40	1028	1	(+)E1A_r60_a97	E1A_r60_a97	10892.1	301.935	4.884818e+001	6.180882e+000	95	25	7.337233e+000	0	0	0	1	0	0	47.211	1	1	54.4085	25.0526
DATA	1316	16	41	0	0	A_44_P161723	NM_001134526	10917.9	301.552	1.441791e+002	1.473669e+001	200.5	25	7.317895e+000	0	0	0	0	0	0	138.95	1	1	42.9674	25.1389
DATA	1317	16	42	0	0	A_64_P121443	A_64_P121443	10942.6	301.931	3.876079e+000	3.081525e+000	65	28	7.051376e+000	0	0	0	0	0	0	3.72518	1	0	53.8203	29.1842
DATA	1318	16	43	0	0	A_42_P771373	NM_012614	10967.8	301.884	1.556951e+004	1.556954e+003	14466	29.5	6.369571e+000	0	0	0	0	0	0	14918.1	1	1	46.5243	29.3333
DATA	1319	16	44	0	0	A_44_P1025944	NM_147140	10993.3	301.9	1.294455e+004	1.294459e+003	12013.5	34	1.198913e+001	0	0	0	0	0	0	12363.2	1	1	47.2035	36.5
DATA	1320	16	45	0	0	A_64_P014085	NM_001007678	11018.5	302	9.873534e+002	9.878357e+001	970	33	9.433411e+000	0	0	0	0	0	0	939.904	1	1	48.5334	34.5484
DATA	1321	16	46	0	0	A_64_P095298	NM_001047963	11044.2	301.912	6.695924e+001	7.377565e+000	125	30	8.366540e+000	0	0	0	0	0	0	63.5169	1	1	46.5243	31.4688
DATA	1322	16	47	0	0	A_64_P122037	A_64_P122037	11069.6	302.023	2.076393e+004	2.076395e+003	19282	31	1.034265e+001	0	0	0	0	0	0	19625.7	1	1	50.1463	35.4483
DATA	1323	16	48	0	0	A_64_P098094	A_64_P098094	11095.5	302	8.119760e+004	8.119760e+003	76163	32	6.155817e+000	0	0	0	0	0	0	76453.2	1	1	54.1152	31.5862
DATA	1324	16	49	0	0	A_44_P353708	ENSRNOT00000033510	11120.3	301.625	5.711375e+001	6.513943e+000	115	30	8.727540e+000	0	0	0	0	0	0	53.5707	1	1	47.5395	30.7931
DATA	1325	16	50	0	0	A_42_P541669	ENSRNOT00000043345	11145.8	301.897	7.434140e+002	7.440789e+001	733	32	7.497002e+000	0	0	0	0	0	0	694.528	1	1	46.5243	31.9714
DATA	1326	16	51	0	0	A_42_P560894	NM_019138	11170.9	301.896	4.073163e+003	4.073286e+002	3717	31	6.912193e+000	0	0	0	0	0	0	3789.91	1	1	46.8651	32.1818
DATA	1327	16	52	0	0	A_42_P498066	NM_031136	11196.5	302	9.185165e+004	9.185165e+003	84222	28.5	9.073179e+000	0	0	0	0	0	0	85102.6	1	1	54.1152	30.25
DATA	1328	16	53	0	0	A_42_P538928	NM_053021	11221.5	302	1.868946e+004	1.868949e+003	17011.5	30.5	8.425198e+000	0	0	0	1	0	0	17242.5	1	1	48.5334	32.5294
DATA	1329	16	54	0	0	A_64_P302169	NM_001099493	11247.2	302.087	3.756381e+001	4.933886e+000	96	31.5	9.620576e+000	0	0	0	0	0	0	34.5008	1	1	46.5243	33.6579
DATA	1330	16	55	0	0	A_43_P18282	NM_001173436	11273	302.387	8.081925e+001	8.697338e+000	133	36	1.158232e+001	0	0	0	0	0	0	73.8929	1	1	44.0646	37.3103
DATA	1331	16	56	0	0	A_44_P304169	NM_001000482	11298.7	302.139	3.890966e+002	3.904339e+001	407	32.5	7.399053e+000	0	0	0	0	0	0	354.069	1	1	47.8731	33.7353
DATA	1332	16	57	0	0	A_44_P318932	XM_231081	11323.3	301.909	6.149627e+003	6.149712e+002	5568	33	8.777518e+000	0	0	0	0	0	0	5570.23	1	1	49.1849	32.7
DATA	1333	16	58	0	0	A_64_P124621	A_64_P124621	11349.4	302.069	1.021425e+002	1.072174e+001	152.5	29	8.980411e+000	0	0	0	0	0	0	92.067	1	1	53.8203	31.1724
DATA	1334	16	59	0	0	A_42_P553960	NM_001107831	11374.3	301.833	9.335156e+003	9.335213e+002	8100	28	6.783972e+000	0	0	0	0	0	0	8373.77	1	1	45.835	28.0882
DATA	1335	16	60	0	0	A_64_P129459	A_64_P129459	11399.4	301.866	9.076329e+002	9.082295e+001	862	30.5	7.826836e+000	0	0	0	0	0	0	810.192	1	1	45.835	30.2059
DATA	1336	16	61	0	0	A_64_P083224	ENSRNOT00000017383	11425.4	302.427	4.958931e+001	5.961053e+000	105	29	7.214531e+000	0	0	0	0	0	0	44.0427	1	1	57.5363	30.129
DATA	1337	16	62	0	0	A_64_P031840	NM_001017445	11450.5	302	1.340330e+003	1.340742e+002	1194	25	5.294194e+000	0	0	0	0	0	0	1184.35	1	1	48.5334	26.5185
DATA	1338	16	63	0	0	A_43_P16427	NM_001191000	11476.1	302.386	7.556858e+001	8.262879e+000	129	30	8.032191e+000	0	0	0	0	0	0	66.434	1	1	57.259	29.9667
DATA	1339	16	64	0	0	A_64_P159034	NM_001191681	11501.5	302.123	1.820411e+004	1.820414e+003	15883	33	3.678923e+001	0	0	1	0	1	0	15919.5	1	1	48.2044	47.7037
DATA	1340	16	65	0	0	A_64_P009007	A_64_P009007	11526.6	302.427	5.624283e+001	6.560168e+000	110.5	28	7.877636e+000	0	0	0	0	0	0	48.9339	1	1	57.5363	30.4286
DATA	1341	16	66	0	0	A_42_P489817	NM_001107681	11552	302	4.729991e+003	4.730113e+002	4117	29	7.852739e+000	0	0	0	0	0	0	4093.17	1	1	46.8651	30.7
DATA	1342	16	67	0	0	A_42_P643272	NM_053389	11577.6	302.427	2.278171e+003	2.278427e+002	1943	34	8.750000e+000	0	0	0	0	0	0	1961.11	1	1	57.5363	35
DATA	1343	16	68	0	0	A_64_P076063	XM_001061753	11603	302.455	1.120984e+002	1.172326e+001	160	27	6.911398e+000	0	0	0	0	0	0	95.9819	1	1	55.8519	28.5526
DATA	1344	16	69	0	0	A_64_P047371	NM_001109423	11628.3	302.306	2.876024e+003	2.876231e+002	2480	33	9.015859e+000	0	0	0	0	0	0	2449.28	1	1	48.2044	32
DATA	1345	16	70	0	0	A_44_P991940	XM_225667	11653.7	302.5	1.077650e+002	1.132090e+001	152.5	33	7.995145e+000	0	0	0	0	0	0	91.2855	1	1	57.5363	32.1212
DATA	1346	16	71	0	0	A_42_P667802	ENSRNOT00000014585	11679.4	302.427	8.368474e+001	9.066124e+000	130	34	9.287452e+000	0	0	0	0	0	0	70.4984	1	1	57.5363	34.5135
DATA	1347	16	72	0	0	A_44_P433942	A_44_P433942	11704.6	301.973	3.040809e+001	4.641546e+000	86	27	9.160899e+000	0	0	0	0	0	0	25.4765	1	1	49.1849	28.7273
DATA	1348	16	73	0	0	A_42_P735279	NM_001004446	11729.6	302.027	2.343098e+004	2.343100e+003	18687	31	7.997403e+000	0	0	0	0	0	0	19526.8	1	1	48.5334	30.9615
DATA	1349	16	74	0	0	A_64_P000316	A_64_P000316	11755.6	302.55	8.629048e+001	9.328723e+000	132	27	7.641068e+000	0	0	0	0	0	0	71.523	1	1	50.7771	27.9118
DATA	1350	16	75	0	0	A_64_P073357	XM_001070426	11780.7	302.5	9.354993e+001	1.001077e+001	133.5	29.5	6.470077e+000	0	0	0	0	0	0	77.1269	1	1	57.5363	29.5938
DATA	1351	16	76	0	0	A_42_P501972	NM_001025418	11806.3	302.5	3.497770e+002	3.516075e+001	348	30	7.546680e+000	0	0	0	1	0	0	286.806	1	1	57.5363	29.2857
DATA	1352	16	77	0	0	A_64_P030824	ENSRNOT00000002002	11830.9	302.343	8.715132e+001	9.430134e+000	138	31.5	6.014533e+000	0	0	0	0	0	0	71.0879	1	1	46.8651	31.2143
DATA	1353	16	78	0	0	A_42_P537715	NM_001025743	11856.6	302.605	2.192345e+003	2.192644e+002	1750	32	7.155606e+000	0	0	0	0	0	0	1778.78	1	1	49.5074	32.7297
DATA	1354	16	79	0	0	A_44_P596424	TC642059	11882.2	302.365	6.536805e+002	6.546936e+001	581	29	8.424368e+000	0	0	0	0	0	0	527.507	1	1	49.1849	30.5946
DATA	1355	16	80	0	0	A_42_P528891	XM_001074805	11907.5	302.384	3.624406e+002	3.642837e+001	341	30	7.305560e+000	0	0	0	1	0	0	290.956	1	1	48.5334	29.3939
DATA	1356	16	81	0	0	A_64_P130516	A_64_P130516	11932.8	302.386	1.141481e+002	1.199301e+001	156	31	8.153613e+000	0	0	0	0	0	0	91.1602	1	1	47.2035	30.925
DATA	1357	16	82	66	1	DarkCorner	DarkCorner	11958.4	302.487	3.712391e+000	3.697942e+000	53	30.5	8.543586e+000	0	0	0	0	0	0	-8.18646	0	0	49.8279	31.9167
DATA	1358	16	83	66	1	DarkCorner	DarkCorner	11983.7	302.323	3.731435e+000	3.716912e+000	58.5	28	8.205931e+000	0	0	0	0	0	0	-5.08562	0	0	44.4243	28.3214
DATA	1359	16	84	66	1	DarkCorner	DarkCorner	12009.4	302.378	3.750417e+000	3.735820e+000	56	30	5.510410e+000	0	0	0	0	0	0	-5.39513	0	0	51.4001	30.2692
DATA	1360	16	85	66	1	DarkCorner	DarkCorner	12034.6	302.573	3.768588e+000	3.755485e+000	62	30	8.797635e+000	0	0	0	0	0	0	0.848448	0	0	57.5363	31.1204
DATA	1361	17	1	66	1	DarkCorner	DarkCorner	9889	308.455	3.202277e+000	3.196958e+000	60	25	7.069718e+000	0	0	0	0	0	0	1.96745	0	0	55.8519	25.7431
DATA	1362	17	2	66	1	DarkCorner	DarkCorner	9914.38	308.449	3.184385e+000	3.171991e+000	57	28	6.505271e+000	0	0	0	0	0	0	-1.57372	0	0	47.5395	27.0625
DATA	1363	17	3	66	1	DarkCorner	DarkCorner	9939.61	308.324	3.167533e+000	3.155205e+000	53	27.5	7.370307e+000	0	0	0	0	0	0	-6.87629	0	0	48.2044	27.8929
DATA	1364	17	4	66	1	DarkCorner	DarkCorner	9965.33	308.5	3.151071e+000	3.138807e+000	53	28	9.207648e+000	0	0	0	0	0	0	-6.41536	0	0	57.5363	28.069
DATA	1365	17	5	0	0	A_44_P434817	NM_001012187	9990.5	308.782	3.649057e+003	3.649191e+002	3439.5	29	8.712129e+000	0	0	0	0	0	0	3432.32	1	1	49.8279	30.913
DATA	1366	17	6	0	0	A_64_P153319	A_64_P153319	10015.9	308.5	5.411607e+002	5.420532e+001	571.5	28	4.990878e+000	0	0	0	0	0	0	511.356	1	1	56.9804	27.1379
DATA	1367	17	7	0	0	A_64_P034394	XM_218828	10041.5	308.5	1.891724e+001	3.627838e+000	76	26	6.636818e+000	0	0	0	0	0	0	17.9545	1	1	57.5363	26.7879
DATA	1368	17	8	0	0	A_64_P001399	A_64_P001399	10066.6	308.873	1.782260e+004	1.782262e+003	17031	30.5	5.691705e+000	0	0	0	0	0	0	16986	1	1	47.5395	29.8929
DATA	1369	17	9	0	0	A_42_P712191	NM_001109207	10092.3	308.5	1.722812e+002	1.749966e+001	214	29	6.828495e+000	0	0	0	0	0	0	164.834	1	1	57.5363	28.0882
DATA	1370	17	10	0	0	A_44_P746633	NM_001109580	10117.4	308.577	1.319160e+004	1.319163e+003	12398	25.5	7.434638e+000	0	0	0	0	0	0	12667.2	1	1	47.8731	26.9231
DATA	1371	17	11	0	0	A_42_P772157	NM_017020	10142.9	308.743	1.665161e+003	1.665440e+002	1639.5	28	6.928661e+000	0	0	0	0	0	0	1604.51	1	1	48.2044	28.2222
DATA	1372	17	12	0	0	A_44_P407543	NM_001024996	10168.4	308.954	1.186420e+002	1.224730e+001	170	29.5	6.217236e+000	0	0	0	0	0	0	114.691	1	1	44.7812	28.9667
DATA	1374	17	14	0	0	A_64_P057225	NM_001008857	10219.1	308.5	1.900162e+002	1.924047e+001	242	28	6.853858e+000	0	0	0	0	0	0	184.72	1	1	65	28.2414
DATA	1375	17	15	0	0	A_42_P462015	NM_001011943	10244.2	309.354	4.459612e+002	4.469789e+001	490	30	8.293280e+000	0	0	0	0	0	0	434.646	1	1	45.4864	28.6129
DATA	1376	17	16	0	0	A_42_P596050	NM_053572	10269.9	308.5	3.142933e+002	3.157294e+001	368.5	28	6.263878e+000	0	0	0	0	0	0	306.988	1	1	56.9804	27.359
DATA	1377	17	17	0	0	A_44_P213776	NM_052829	10294.9	308.729	1.512265e+002	1.541771e+001	209	28	6.594174e+000	0	0	0	0	0	0	148.011	1	1	46.5243	28.1282
DATA	1378	17	18	0	0	A_64_P004468	A_64_P004468	10320.4	308.594	6.225229e+003	6.225301e+002	6138.5	27	9.328647e+000	0	0	0	0	0	0	6103.89	1	1	47.5395	29.0968
DATA	1379	17	19	0	0	A_44_P290394	NM_053580	10345.8	308.573	3.402885e+003	3.403017e+002	3313	24.5	6.371481e+000	0	0	0	0	0	0	3341.85	1	1	52.6241	25.7188
DATA	1380	17	20	0	0	A_64_P076911	XM_215948	10371.4	309.115	8.732137e+001	9.229010e+000	145	26	4.709544e+000	0	0	0	0	0	0	85.8792	1	1	43.7019	24.5862
DATA	1381	17	21	0	0	A_64_P155895	NM_001009658	10396.5	309.099	2.757452e+003	2.757613e+002	2751	26	4.891684e+000	0	0	0	0	0	0	2714.98	1	1	47.8731	27.1429
DATA	1382	17	22	0	0	A_43_P16338	ENSRNOT00000034555	10421.7	309.029	6.820285e+001	7.443402e+000	127	29	7.691471e+000	0	0	0	0	0	0	67.2139	1	1	46.1809	27.3889
DATA	1383	17	23	0	0	A_42_P716283	NM_001107983	10447.1	309.328	8.800447e+002	8.805488e+001	920.5	29	9.430685e+000	0	0	0	0	0	0	867.939	1	1	45.1352	29.3429
DATA	1384	17	24	0	0	A_43_P13355	NM_139082	10473.1	308.614	1.559052e+002	1.587234e+001	212.5	33	1.014072e+001	0	0	0	0	0	0	153.827	1	1	57.259	31.8824
DATA	1385	17	25	0	0	A_64_P126065	NM_001005900	10498.2	308.776	7.073444e+001	7.674304e+000	129	28	7.054956e+000	0	0	0	0	0	0	69.8134	1	1	46.1809	27.8947
DATA	1386	17	26	0	0	A_44_P838532	NM_001107144	10523.9	308.808	1.213206e+003	1.213571e+002	1239	28	8.546403e+000	0	0	0	0	0	0	1197.52	1	1	47.5395	28.6786
DATA	1387	17	27	0	0	A_42_P785861	NM_001009422	10549.2	309	3.718798e+003	3.718917e+002	3582	28	8.607555e+000	0	0	0	0	0	0	3670.37	1	1	46.8651	29.44
DATA	1388	17	28	0	0	A_42_P641962	NM_012999	10574.5	308.87	2.367688e+003	2.367875e+002	2370	31	1.128260e+001	0	0	0	0	0	0	2336.08	1	1	47.2035	33.9167
DATA	1389	17	29	0	0	A_64_P085201	TC633318	10600	309	1.224613e+002	1.260333e+001	179	34	1.111673e+001	0	0	0	0	0	0	120.766	1	1	54.9904	36.0667
DATA	1390	17	30	0	0	A_64_P015687	NM_053573	10625.2	309	5.333057e+003	5.333140e+002	4986	30	7.314002e+000	0	0	0	0	0	0	5255.52	1	1	47.8731	29.8065
DATA	1391	17	31	0	0	A_64_P078332	NM_012794	10650.4	309.212	2.040687e+002	2.062389e+001	254	29	7.308980e+000	0	0	0	0	0	0	200.926	1	1	40.6843	30.2759
DATA	1392	17	32	0	0	A_42_P637189	NM_031612	10675.8	309.167	4.905399e+003	4.905489e+002	4687.5	30.5	8.547543e+000	0	0	0	0	0	0	4824.57	1	1	47.5395	32.8125
DATA	1393	17	33	0	0	A_42_P602472	NM_001008290	10701.5	309	2.972869e+003	2.973020e+002	2981.5	33	8.602766e+000	0	0	0	0	0	0	2920.05	1	1	48.5334	32.5152
DATA	1394	17	34	0	0	A_64_P003749	NM_031799	10727	309	1.400318e+002	1.432000e+001	178.5	29	7.025797e+000	0	0	0	0	0	0	137.342	1	1	54.9904	30.8519
DATA	1395	17	35	0	0	A_42_P785861	NM_001009422	10752.4	309.042	3.636189e+003	3.636313e+002	3582	28	9.399586e+000	0	0	0	0	0	0	3560.5	1	1	48.2044	30.931
DATA	1396	17	36	0	0	A_64_P138889	NM_001013050	10777.4	308.972	4.612022e+003	4.612120e+002	4367	29	9.538768e+000	0	0	0	0	0	0	4507.87	1	1	48.2044	32.8929
DATA	1397	17	37	0	0	A_44_P409820	NM_012908	10803.5	309	5.775254e+001	6.513533e+000	118	36	1.000138e+001	0	0	0	0	0	0	56.3331	1	1	54.1152	37.1304
DATA	1398	17	38	0	0	A_44_P529880	ENSRNOT00000033370	10828.5	309	4.479285e+001	8.901525e+000	75	32.5	9.773915e+000	0	0	0	0	0	0	43.5989	1	1	54.1152	32.5294
DATA	1399	17	39	0	0	A_64_P084851	ENSRNOT00000029593	10853.6	309.042	1.094374e+002	1.135424e+001	165	27	5.040503e+000	0	0	0	0	0	0	106.276	1	1	48.2044	27.64
DATA	1400	17	40	0	0	A_44_P654068	NM_001114402	10879.1	309.134	3.976530e+002	3.988080e+001	444	25	6.223356e+000	0	0	0	0	0	0	385.204	1	1	46.1809	25.8889
DATA	1401	17	41	0	0	A_64_P094855	NM_001109591	10904.4	309.027	1.197898e+003	1.198284e+002	1236.5	25	7.274547e+000	0	0	0	0	0	0	1157.31	1	1	48.5334	24.7692
DATA	1402	17	42	0	0	A_42_P516658	NM_001024888	10929.9	309.095	2.456348e+002	2.475206e+001	297	25.5	6.792853e+000	0	0	0	0	0	0	236.648	1	1	47.5395	25.8333
DATA	1403	17	43	0	0	A_64_P092394	ENSRNOT00000064749	10955.5	309	1.511257e+001	3.411743e+000	76	29.5	5.947388e+000	0	0	0	0	0	0	14.5161	1	0	54.1152	29.3333
DATA	1404	17	44	0	0	A_44_P280755	NM_148890	10980.9	309.065	6.172582e+001	6.893118e+000	126	29	9.748260e+000	0	0	0	0	0	0	59.1058	1	1	54.4085	31.3333
DATA	1405	17	45	0	0	A_42_P629062	AF072835	11005.9	309.099	5.091033e+002	5.100330e+001	519	29.5	8.351140e+000	0	0	0	0	0	0	485.935	1	1	46.8651	30.3077
DATA	1406	17	46	0	0	A_64_P131141	ENSRNOT00000012638	11031.6	309.427	4.086262e+001	5.122165e+000	100	30.5	6.683399e+000	0	0	0	0	0	0	38.8715	1	1	57.5363	30.2333
DATA	1407	17	47	0	0	A_42_P756350	NM_021772	11057.1	309.386	7.085652e+001	7.733916e+000	123	32	9.082325e+000	0	0	0	0	0	0	67.165	1	1	57.259	34.6364
DATA	1408	17	48	66	-1	(-)3xSLv1	NegativeControl	11082.5	309.352	3.123063e+000	3.110907e+000	54	32	6.140859e+000	0	0	0	0	0	0	-7.25852	0	0	57.5363	32.6667
DATA	1409	17	49	0	0	A_64_P124796	A_64_P124796	11107.6	309.404	7.525290e+001	8.147418e+000	129	28	6.779501e+000	0	0	0	0	0	0	70.8058	1	1	65	28.9643
DATA	1410	17	50	0	0	A_44_P288443	NM_001108878	11132.8	309.234	6.598494e+002	6.605936e+001	681	28.5	7.623273e+000	0	0	0	0	0	0	618.434	1	1	49.5074	30
DATA	1411	17	51	0	0	A_42_P748004	NM_001135873	11158.6	309.36	1.490385e+003	1.490717e+002	1337	29.5	6.908300e+000	0	0	0	0	0	0	1391.17	1	1	48.8603	31.7308
DATA	1412	17	52	0	0	A_64_P067310	NM_001139507	11184	309.455	1.613550e+003	1.613859e+002	1551	31	8.496100e+000	0	0	0	0	0	0	1499.93	1	1	55.8519	31.9394
DATA	1413	17	53	0	0	A_44_P210809	NM_001107334	11209.4	309.427	1.093961e+002	1.139078e+001	162	28	8.755091e+000	0	0	0	0	0	0	101.26	1	1	57.5363	30.5806
DATA	1414	17	54	1028	1	(+)E1A_r60_a104	E1A_r60_a104	11234.6	309.427	5.295864e+000	3.231525e+000	65	33	8.339439e+000	0	0	0	0	0	0	4.88088	1	0	57.5363	34.7097
DATA	1415	17	55	0	0	A_44_P1042711	NM_001108426	11260.4	309.427	1.353937e+002	1.391292e+001	187	31	1.138013e+001	0	0	0	0	0	0	124.219	1	1	57.5363	32.3103
DATA	1416	17	56	0	0	A_42_P661992	TC596141	11285.6	309.427	2.624801e+002	2.644440e+001	310	32	8.631777e+000	0	0	0	0	0	0	239.732	1	1	57.5363	33.4848
DATA	1417	17	57	0	0	A_42_P565621	NM_001105971	11311	309.455	5.460511e+001	6.345214e+000	109	31.5	8.777441e+000	0	0	0	0	0	0	49.6416	1	1	55.8519	31.5
DATA	1418	17	58	0	0	A_44_P264600	NM_001013132	11336.2	309.296	1.713364e+002	1.743862e+001	221.5	28	6.564910e+000	0	0	0	0	0	0	155.027	1	1	47.2035	28.4118
DATA	1419	17	59	0	0	A_64_P034901	TC591400	11361.7	309.5	7.453824e+001	8.136628e+000	132.5	28	6.843295e+000	0	0	0	0	0	0	67.1211	1	1	57.5363	28.3571
DATA	1420	17	60	0	0	A_42_P468216	NM_001030026	11386.8	309.4	2.607510e+003	2.607716e+002	2230.5	29	7.469478e+000	0	0	0	1	0	0	2336.66	1	1	49.1849	28.6897
DATA	1421	17	61	0	0	A_64_P062855	XM_343708	11412.5	309.5	2.312711e+001	4.025648e+000	84	31	7.670377e+000	0	0	0	0	0	0	20.6215	1	1	57.5363	32.5625
DATA	1422	17	62	0	0	A_64_P048421	AABR03055399	11438	309.455	1.073762e+001	3.481455e+000	72.5	28	8.444779e+000	0	0	0	0	0	0	9.52599	1	0	55.8519	29.7429
DATA	1423	17	63	0	0	A_44_P342166	NM_013187	11463.1	309.507	1.581383e+002	1.616030e+001	199	29	7.025300e+000	0	0	0	0	0	0	139.591	1	1	49.1849	28.75
DATA	1424	17	64	0	0	A_42_P748154	XM_001059949	11488.3	309.662	3.991123e+003	3.991264e+002	3446.5	29	9.567914e+000	0	0	0	0	0	0	3505.22	1	1	48.5334	30.7143
DATA	1425	17	65	0	0	A_64_P157763	A_64_P157763	11514.3	309.5	2.525200e+003	2.525424e+002	1963	35	5.846657e+001	0	1	1	0	1	0	2205.92	1	1	57.5363	61.3913
DATA	1426	17	66	0	0	A_64_P155645	NM_022706	11539.4	309.64	1.154618e+004	1.154623e+003	9474	27.5	7.599342e+000	0	0	0	0	0	0	10034.7	1	1	48.8603	29.25
DATA	1427	17	67	0	0	A_42_P622436	NM_022298	11564.9	309.5	8.997226e+004	8.997227e+003	76442.5	31.5	8.935150e+000	0	0	0	0	0	0	77778.3	1	1	56.9804	32.2647
DATA	1428	17	68	0	0	A_44_P304190	NM_001014044	11590.1	309.382	1.675945e+002	1.710418e+001	206	30	9.053613e+000	0	0	0	0	0	0	144.116	1	1	46.1809	32.1765
DATA	1429	17	69	1028	1	(+)E1A_r60_a104	E1A_r60_a104	11615.7	309.5	3.448439e+000	3.435018e+000	62	30	8.721497e+000	0	0	0	0	0	0	-0.564499	0	0	57.5363	29.75
DATA	1430	17	70	0	0	A_42_P771373	NM_012614	11640.4	309.608	1.555710e+004	1.555714e+003	12625.5	35	9.550359e+000	0	0	0	1	0	0	13237.3	1	1	49.1849	33.069
DATA	1431	17	71	0	0	A_64_P101976	A_64_P101976	11666.2	309.714	2.486647e+001	4.270379e+000	83	36	8.095543e+000	0	0	0	0	0	0	21.044	1	1	47.2035	35.275
DATA	1432	17	72	0	0	A_42_P777935	ENSRNOT00000027369	11691.5	309.648	2.782923e+002	2.804726e+001	301	34	9.018944e+000	0	0	0	0	0	0	234.25	1	1	47.8731	32.8529
DATA	1433	17	73	0	0	A_64_P041521	NM_012945	11717.4	309.573	1.434286e+002	1.476604e+001	183	31.5	9.198701e+000	0	0	0	0	0	0	120.065	1	1	57.5363	30.9333
DATA	1434	17	74	0	0	A_44_P102661	NM_138862	11742	309.493	1.720319e+003	1.720681e+002	1410	31.5	8.268878e+000	0	0	0	0	0	0	1432.58	1	1	48.5334	30.3214
DATA	1435	17	75	0	0	A_42_P714166	NM_001017491	11768.1	309.5	2.561561e+001	4.375830e+000	83	26	6.238831e+000	0	0	0	1	0	0	21.2135	1	1	65	27.1389
DATA	1436	17	76	0	0	A_64_P098703	NM_198728	11793.4	309.722	8.555231e+002	8.562662e+001	786	28.5	7.076674e+000	0	0	0	0	0	0	704.769	1	1	48.5334	27.7
DATA	1437	17	77	0	0	A_44_P624151	NM_001107932	11818.4	309.608	7.063228e+002	7.072322e+001	625.5	28	6.599373e+000	0	0	0	0	0	0	578.785	1	1	49.1849	28.1379
DATA	1438	17	78	0	0	A_42_P674843	NM_001008880	11843.7	309.724	7.014304e+002	7.023558e+001	618	33	8.143598e+000	0	0	0	0	0	0	571.761	1	1	49.5074	33.5455
DATA	1439	17	79	0	0	A_44_P1039634	NM_001108924	11869.6	309.573	9.883811e+001	1.038502e+001	150	28	7.394844e+000	0	0	0	0	0	0	80.1308	1	1	57.5363	28.6061
DATA	1440	17	80	0	0	A_42_P517253	NM_001012275	11895	309.545	3.803834e+002	3.821240e+001	364	29.5	6.573050e+000	0	0	0	1	0	0	306.771	1	1	55.8519	29.3529
DATA	1441	17	81	0	0	A_42_P485589	NM_017246	11920.1	309.527	1.142293e+002	1.199550e+001	154	30	8.419376e+000	0	0	0	0	0	0	91.652	1	1	48.5334	30.0541
DATA	1442	17	82	66	1	DarkCorner	DarkCorner	11945.6	309.573	3.695099e+000	3.680717e+000	61	30.5	7.987441e+000	0	0	0	0	0	0	-0.857693	0	0	57.5363	31.0278
DATA	1443	17	83	66	1	DarkCorner	DarkCorner	11971.4	309.573	3.714254e+000	3.699798e+000	59.5	30.5	1.010064e+001	0	0	0	0	0	0	-4.74115	0	0	57.5363	32.3333
DATA	1444	17	84	66	1	DarkCorner	DarkCorner	11996.6	309.573	3.732759e+000	3.718231e+000	57	30	7.476271e+000	0	0	0	0	0	0	-6.61913	0	0	57.5363	30.1935
DATA	1445	17	85	66	1	DarkCorner	DarkCorner	12021.4	309.929	3.750438e+000	3.735841e+000	58	31	7.324011e+000	0	0	0	0	0	0	-3.78808	0	0	49.8279	31.4324
DATA	1446	18	1	66	1	DarkCorner	DarkCorner	9901.5	315.897	3.189260e+000	3.176847e+000	56	28	7.906540e+000	0	0	0	0	0	0	-2.86459	0	0	47.2035	27.8235
DATA	1447	18	2	66	1	DarkCorner	DarkCorner	9926.75	315.89	3.172016e+000	3.159670e+000	52	30	5.959841e+000	0	0	0	0	0	0	-7.51141	0	0	47.8731	29.6552
DATA	1448	18	3	66	1	DarkCorner	DarkCorner	9952.63	315.901	3.155225e+000	3.142945e+000	53.5	23	9.585241e+000	0	0	0	0	0	0	-2.83795	0	0	47.5395	26.6552
DATA	1449	18	4	0	0	A_42_P608713	TC595074	9977.61	315.931	5.542621e+002	5.551438e+001	575	32	1.313637e+001	0	0	0	0	0	0	520.663	1	1	53.8203	32.2222
DATA	1450	18	5	0	0	A_44_P411771	XM_001056376	10003.1	316.024	8.077540e+002	8.083536e+001	821	27.5	5.137757e+000	0	0	0	0	0	0	762.398	1	1	50.7771	28.5
DATA	1451	18	6	0	0	A_42_P703647	NM_001108688	10028.4	316	4.316227e+001	5.313516e+000	99.5	28	6.465479e+000	0	0	0	0	0	0	40.9208	1	1	48.5334	27.5625
DATA	1452	18	7	0	0	A_64_P139212	NM_001030052	10053.8	316.023	2.784313e+004	2.784315e+003	26557	30	5.471452e+000	0	0	0	0	0	0	26509.3	1	1	51.0895	29.8333
DATA	1453	18	8	0	0	A_64_P082461	FQ211879	10079.4	316.307	1.016318e+002	1.061770e+001	154	31	4.768061e+000	0	0	0	0	0	0	97.158	1	1	47.8731	30.4118
DATA	1454	18	9	0	0	A_64_P144053	NM_001108100	10104.5	316	3.998406e+002	4.010114e+001	434	30.5	8.874324e+000	0	0	0	0	0	0	383.647	1	1	48.5334	29.3333
DATA	1455	18	10	0	0	A_42_P455802	NM_001013929	10129.8	316	4.082057e+003	4.082172e+002	3894	28	6.190530e+000	0	0	0	0	0	0	3930.49	1	1	46.8651	27.4138
DATA	1456	18	11	0	0	A_44_P575367	ENSRNOT00000068160	10155.5	315.985	8.095383e+000	3.147081e+000	68	28	9.438859e+000	0	0	0	0	0	0	7.82083	1	0	47.2035	29.7778
DATA	1457	18	12	0	0	A_64_P008259	ENSRNOT00000040453	10180.9	316	3.542564e+003	3.542694e+002	3499	29	5.775891e+000	0	0	0	0	0	0	3432.89	1	1	46.8651	28.5333
DATA	1458	18	13	0	0	A_44_P433935	NM_001024894	10206.3	315.946	3.035213e+000	3.037509e+000	65	28	6.100640e+000	0	0	0	0	0	0	2.84174	0	0	48.8603	28.0303
DATA	1459	18	14	0	0	A_64_P027747	TC585156	10231.4	316.208	8.969617e+003	8.969668e+002	8612	30.5	8.529136e+000	0	0	0	0	0	0	8739.08	1	1	49.1849	29.1154
DATA	1460	18	15	0	0	A_44_P247880	ENSRNOT00000032333	10256.7	316.24	4.876789e+000	3.047728e+000	66	25.5	6.480741e+000	0	0	0	0	0	0	4.76264	1	0	48.5334	26
DATA	1461	18	16	0	0	A_44_P422321	NM_001105813	10282.1	316.211	2.113566e+003	2.113779e+002	2091.5	26	7.932853e+000	0	0	0	0	0	0	2068.52	1	1	47.2035	27.6111
DATA	1462	18	17	0	0	A_44_P374824	ENSRNOT00000025777	10307.9	316.065	2.048087e+001	3.629359e+000	80	31	6.976541e+000	0	0	0	0	0	0	20.0829	1	1	65	30.7632
DATA	1463	18	18	0	0	A_64_P029482	A_64_P029482	10333.1	316.189	4.992031e+001	5.819597e+000	109	27	8.077513e+000	0	0	0	0	0	0	49.033	1	1	47.5395	29.6061
DATA	1464	18	19	0	0	A_64_P083918	NM_053396	10358.4	316.1	1.596002e+001	3.386536e+000	75	27	6.492841e+000	0	0	0	0	0	0	15.6991	1	1	46.8651	27.0968
DATA	1465	18	20	1028	1	(+)E1A_r60_3	E1A_r60_3	10384.4	316.427	1.651358e+001	3.409528e+000	78.5	26	4.295069e+000	0	0	0	0	0	0	16.265	1	1	57.5363	25.381
DATA	1466	18	21	0	0	A_42_P508415	CV108834	10409.3	316.222	1.709257e+002	1.735039e+001	228	29	6.336422e+000	0	0	0	0	0	0	168.519	1	1	47.5395	28.3103
DATA	1467	18	22	0	0	A_64_P018331	NM_001107720	10434.9	316.288	2.078995e+003	2.079209e+002	2067	29	9.528164e+000	0	0	0	0	0	0	2051.43	1	1	48.5334	28.6053
DATA	1468	18	23	0	0	A_64_P142056	NM_001011938	10460.1	316.397	9.778415e+003	9.778460e+002	9544	34	1.017409e+001	0	0	0	0	0	0	9654.69	1	1	48.5334	33.3514
DATA	1469	18	24	0	0	A_44_P1030098	NM_001105866	10485.6	316.451	2.092353e+002	2.113390e+001	263	32	8.810917e+000	0	0	0	0	0	0	206.671	1	1	48.2044	31.9677
DATA	1470	18	25	0	0	A_64_P125958	NM_177933	10511.4	316.427	3.683035e+001	4.733812e+000	99	28	7.080137e+000	0	0	0	0	0	0	36.3859	1	1	57.5363	28.4118
DATA	1471	18	26	0	0	A_64_P002066	XM_001056138	10536.4	316.164	6.574461e+001	7.215857e+000	125.5	29	8.641647e+000	0	0	0	0	0	0	64.9482	1	1	48.5334	30.2963
DATA	1472	18	27	0	0	A_42_P521242	ENSRNOT00000003841	10561.6	315.882	8.970469e+002	8.975400e+001	942	28	8.785693e+000	0	0	0	0	0	0	885.962	1	1	46.5243	29.8333
DATA	1473	18	28	0	0	A_42_P652827	NM_001024274	10586.6	315.841	3.417741e+003	3.417871e+002	3361	31	9.394550e+000	0	0	0	0	0	0	3374.13	1	1	47.2035	32.8485
DATA	1474	18	29	0	0	A_42_P533792	NM_001106575	10612.4	316.295	1.012339e+004	1.012344e+003	9604	33	9.609172e+000	0	0	0	0	0	0	9988.57	1	1	50.4627	34.4815
DATA	1475	18	30	1028	1	(+)E1A_r60_1	E1A_r60_1	10638.1	316.5	1.209255e+002	1.245433e+001	171	31	6.818503e+000	0	0	0	1	0	0	119.221	1	1	56.9804	30.5882
DATA	1476	18	31	0	0	A_64_P210103	NM_001100666	10663.5	316.5	1.348966e+002	1.381554e+001	181	32	9.412300e+000	0	0	0	0	0	0	132.863	1	1	57.5363	32.5161
DATA	1477	18	32	0	0	A_64_P131745	A_64_P131745	10688.9	316.5	8.907399e+001	9.394742e+000	143.5	36	8.363728e+000	0	0	0	0	0	0	87.6274	1	1	56.9804	34.2162
DATA	1478	18	33	0	0	A_64_P017791	XM_002727063	10714.4	316.427	3.536511e+001	4.664929e+000	85	27	6.920594e+000	0	0	0	0	0	0	34.7427	1	1	57.5363	29.1935
DATA	1479	18	34	0	0	A_42_P560288	NM_198788	10739.3	316.338	1.088955e+004	1.088959e+003	10460.5	28	8.790211e+000	0	0	0	0	0	0	10681.6	1	1	48.5334	30.037
DATA	1480	18	35	0	0	A_42_P571463	NM_001013221	10765.1	316.5	2.127608e+003	2.127820e+002	2081.5	27	1.062844e+001	0	0	0	0	0	0	2083.37	1	1	56.9804	30.4375
DATA	1481	18	36	0	0	A_42_P648207	NM_001013882	10790.2	316.541	8.029027e+002	8.034652e+001	826	28.5	7.477476e+000	0	0	0	0	0	0	784.738	1	1	48.8603	30.5333
DATA	1482	18	37	0	0	A_64_P120833	NM_131910	10815.2	316.507	1.334302e+004	1.334305e+003	12694	35	1.493673e+001	0	0	0	0	0	0	13014.6	1	1	47.8731	39.0345
DATA	1483	18	38	0	0	A_42_P705337	TC582694	10840.8	316.59	2.329309e+003	2.329504e+002	2363	31	7.875196e+000	0	0	0	0	0	0	2266.89	1	1	50.1463	29.2647
DATA	1484	18	39	0	0	A_44_P544340	NM_001034939	10866	316.616	7.581441e+002	7.587478e+001	796	25	5.976437e+000	0	0	0	0	0	0	736.078	1	1	48.8603	26.0303
DATA	1486	18	41	0	0	A_44_P310596	NM_001014166	10917.5	316.5	5.749203e+002	5.757247e+001	624	25	8.086305e+000	0	0	0	0	0	0	555.202	1	1	57.5363	25.7368
DATA	1487	18	42	0	0	A_64_P013409	A_64_P013409	10942.7	316.5	1.191703e+001	3.275524e+000	71	28	6.686874e+000	0	0	0	0	0	0	11.4756	1	0	57.5363	27.8571
DATA	1488	18	43	0	0	A_64_P076485	A_64_P076485	10968	316.229	2.553042e+003	2.553225e+002	2483	31	1.119638e+001	0	0	0	0	0	0	2451	1	1	46.8651	32.6136
DATA	1489	18	44	0	0	A_64_P096121	ENSRNOT00000028891	10993.6	316.573	5.434664e+001	6.241826e+000	115	30	9.299454e+000	0	0	0	0	0	0	52.0108	1	1	57.5363	31.6875
DATA	1490	18	45	0	0	A_42_P521086	NM_001100857	11019.2	316.735	4.902219e+001	5.789573e+000	105	31	6.242631e+000	0	0	0	0	0	0	46.7602	1	1	46.1809	29.4483
DATA	1491	18	46	0	0	A_64_P143133	TC637520	11044.4	316.573	5.176791e+001	6.029276e+000	110.5	31	8.364029e+000	0	0	0	0	0	0	49.2094	1	1	57.5363	30.9032
DATA	1492	18	47	0	0	A_64_P067163	NM_017248	11069.6	316.573	5.160419e+004	5.160420e+003	47183.5	34	9.486482e+000	0	0	0	0	0	0	48880.3	1	1	57.5363	37.08
DATA	1493	18	48	0	0	A_64_P118288	NM_053448	11094.9	316.529	5.747630e+002	5.756055e+001	596	29	5.842464e+000	0	0	0	0	0	0	542.417	1	1	47.8731	30.0435
DATA	1494	18	49	0	0	A_64_P112342	A_64_P112342	11120.6	316.573	3.827009e+001	4.941011e+000	96.5	27.5	5.655594e+000	0	0	0	0	0	0	35.9768	1	1	57.5363	27.8824
DATA	1495	18	50	0	0	A_64_P074741	NM_001077680	11146	316.545	7.161969e+001	7.819144e+000	130	28.5	7.791479e+000	0	0	0	0	0	0	67.0621	1	1	55.8519	30.9167
DATA	1496	18	51	0	0	A_64_P153062	NM_001107890	11170.8	316.507	4.248911e+002	4.260573e+001	442	31	6.811867e+000	0	0	0	0	0	0	396.275	1	1	47.5395	32.1923
DATA	1497	18	52	0	0	A_64_P051942	A_64_P051942	11196.8	316.412	3.672472e+002	3.686075e+001	399	27	7.603578e+000	0	0	0	0	0	0	341.048	1	1	46.8651	29.7576
DATA	1498	18	53	0	0	A_44_P233080	ENSRNOT00000026303	11222.2	316.863	7.890245e+003	7.890309e+002	7147.5	29	6.968285e+000	0	0	0	0	0	0	7296.58	1	1	47.5395	29.9032
DATA	1499	18	54	0	0	A_64_P127747	A_64_P127747	11247.4	316.819	1.250352e+002	1.290428e+001	177	33	7.691832e+000	0	0	0	0	0	0	115.124	1	1	47.8731	34.4167
DATA	1500	18	55	0	0	A_42_P773155	NM_001106996	11273.1	316.713	3.463085e+004	3.463087e+003	30888	32	1.372338e+001	0	0	0	0	0	0	31741.1	1	1	52.9257	35.7419
DATA	1501	18	56	0	0	A_64_P003624	NM_175591	11298.5	316.667	4.525817e+001	5.554577e+000	102	32	8.669313e+000	0	0	0	0	0	0	41.2913	1	1	46.1809	33.9032
DATA	1502	18	57	0	0	A_64_P148728	NM_030989	11323.4	316.479	4.577152e+002	4.588571e+001	482	25	7.161061e+000	0	0	0	0	0	0	415.677	1	1	48.2044	27.931
DATA	1503	18	58	0	0	A_44_P436284	ENSRNOT00000031389	11348.8	316.907	5.045573e+002	5.056032e+001	522.5	27	5.271683e+000	0	0	0	0	0	0	456.087	1	1	48.2044	27.1724
DATA	1504	18	59	0	0	A_42_P626851	NM_001107917	11373.9	316.786	7.513049e+002	7.520144e+001	720.5	27	7.188109e+000	0	0	0	0	0	0	675.88	1	1	46.8651	28.0857
DATA	1505	18	60	0	0	A_42_P797303	TC587453	11399.7	316.829	1.670506e+004	1.670509e+003	14561	30.5	6.909262e+000	0	0	0	0	0	0	14953.7	1	1	47.2035	29.4375
DATA	1506	18	61	0	0	A_64_P096312	A_64_P096312	11424.4	316.828	4.813217e+003	4.813330e+002	4337	31	7.610942e+000	0	0	0	0	0	0	4287.82	1	1	42.9674	33.7333
DATA	1507	18	62	0	0	A_64_P150894	A_64_P150894	11450.5	317	3.811602e+002	3.825990e+001	402	29	9.478896e+000	0	0	0	0	0	0	337.817	1	1	54.1152	31.129
DATA	1508	18	63	0	0	A_64_P241372	NM_001000593	11476.1	316.935	4.310639e+001	5.448333e+000	98.5	29.5	6.935918e+000	0	0	0	0	0	0	38.0088	1	1	54.4085	30.1176
DATA	1509	18	64	0	0	A_44_P433621	NM_001025016	11501.5	317	5.157360e+002	5.168224e+001	494.5	32.5	1.262939e+001	0	0	0	0	0	0	452.423	1	1	54.1152	35.3077
DATA	1510	18	65	0	0	A_64_P163511	NM_013190	11526.5	316.916	2.780463e+003	2.780667e+002	2429	34	7.075498e+000	0	0	0	0	0	0	2426.66	1	1	49.8279	33.2963
DATA	1511	18	66	0	0	A_44_P129412	AF155959	11552.1	316.855	2.636891e+003	2.637108e+002	2260	29.5	6.876664e+000	0	0	0	0	0	0	2289.27	1	1	47.8731	30.2333
DATA	1512	18	67	0	0	A_64_P143037	NM_001025134	11577.5	317	6.121256e+002	6.130702e+001	592	33	9.352853e+000	0	0	0	0	0	0	528.653	1	1	48.5334	35.2
DATA	1513	18	68	0	0	A_64_P032693	XM_002724830	11603	316.797	2.259108e+001	4.098959e+000	80	32	7.540282e+000	0	0	0	0	0	0	19.4062	1	1	46.8651	31.2432
DATA	1514	18	69	0	0	A_42_P727368	NM_001025693	11628.3	316.706	1.005006e+002	1.062199e+001	150	32	8.961710e+000	0	0	0	0	0	0	85.8745	1	1	46.5243	32.3043
DATA	1515	18	70	0	0	A_64_P075765	A_64_P075765	11653.5	317	2.035037e+001	4.011040e+000	79	35.5	9.957051e+000	0	0	0	0	0	0	17.2981	1	1	54.1152	33.6667
DATA	1516	18	71	0	0	A_42_P639174	NM_001106592	11679.2	317.026	2.288975e+003	2.289239e+002	1930	34	8.471458e+000	0	0	0	0	0	0	1935.17	1	1	49.1849	33.8529
DATA	1517	18	72	0	0	A_64_P063135	NM_001109623	11704.6	316.897	9.659811e+001	1.027228e+001	142	31	8.107332e+000	0	0	0	0	0	0	81.2285	1	1	46.5243	30.3929
DATA	1518	18	73	0	0	A_64_P018236	NM_001108882	11730	317	3.526322e+000	3.512597e+000	62.5	34	6.320685e+000	0	0	0	0	0	0	-0.212082	0	0	54.9904	34.3929
DATA	1519	18	74	0	0	A_43_P14648	NM_001012034	11755.1	317.013	7.402796e+002	7.411214e+001	669	28	8.520030e+000	0	0	0	0	0	0	615.928	1	1	48.5334	30.1818
DATA	1520	18	75	0	0	A_42_P698520	NM_001108216	11780.5	317	8.555382e+003	8.555456e+002	7211	28	5.877385e+000	0	0	0	1	0	0	7080.38	1	1	48.5334	29.1071
DATA	1521	18	76	0	0	A_43_P19450	NM_001105713	11805.4	317.091	1.932837e+002	1.965504e+001	227	26.5	7.135499e+000	0	0	0	0	0	0	159.131	1	1	45.4864	27.2143
DATA	1522	18	77	0	0	A_64_P013012	XM_225619	11831.2	317.227	6.526810e+002	6.536663e+001	611	29	9.290860e+000	0	0	0	0	0	0	534.499	1	1	45.835	32.1515
DATA	1523	18	78	0	0	A_42_P499684	NM_001108642	11856.8	316.814	5.039513e+002	5.052406e+001	453	28	6.534428e+000	0	0	0	1	0	0	410.467	1	1	46.8651	29.2941
DATA	1524	18	79	0	0	A_64_P297479	ENSRNOT00000044350	11882.1	316.778	2.610819e+004	2.610822e+003	20610.5	29	7.619134e+000	0	0	0	0	0	0	21154.6	1	1	45.4864	28.9474
DATA	1525	18	80	0	0	A_64_P103238	NM_001014158	11907.4	317.156	4.981229e+002	4.994543e+001	448	30.5	7.268259e+000	0	0	0	0	0	0	401.575	1	1	49.8279	31
DATA	1526	18	81	0	0	A_42_P751562	NM_001037355	11932.9	317.068	4.961323e+003	4.961459e+002	3902	30.5	8.346085e+000	0	0	0	0	0	0	3979.05	1	1	46.8651	30.6667
DATA	1527	18	82	66	1	DarkCorner	DarkCorner	11958.5	317.352	3.696191e+000	3.681805e+000	55	30	9.943157e+000	0	0	0	0	0	0	-7.20078	0	0	65	31.5405
DATA	1528	18	83	66	1	DarkCorner	DarkCorner	11984	317.455	3.714714e+000	3.700256e+000	57	31	8.475523e+000	0	0	0	0	0	0	-5.71604	0	0	55.8519	31.6
DATA	1529	18	84	66	1	DarkCorner	DarkCorner	12009.4	317.425	3.733143e+000	3.718613e+000	60	31	8.377389e+000	0	0	0	0	0	0	-2.57673	0	0	52.6241	31.2258
DATA	1530	18	85	66	1	DarkCorner	DarkCorner	12034.6	317.427	3.751178e+000	3.736655e+000	62	30	8.404099e+000	0	0	0	0	0	0	0.188541	0	0	57.5363	31.0559
DATA	1531	19	1	66	1	DarkCorner	DarkCorner	9888.58	322.973	3.194495e+000	3.185544e+000	61	24	7.142169e+000	0	0	0	0	0	0	1.37492	0	0	48.5334	25.3221
DATA	1532	19	2	66	1	DarkCorner	DarkCorner	9914.2	323.026	3.176649e+000	3.164285e+000	58	31	6.816562e+000	0	0	0	0	0	0	-1.56034	0	0	49.1849	29.5862
DATA	1533	19	3	66	1	DarkCorner	DarkCorner	9939.47	323.123	3.159893e+000	3.147594e+000	53	27	8.194317e+000	0	0	0	0	0	0	-6.28021	0	0	49.8279	27.9643
DATA	1534	19	4	66	1	DarkCorner	DarkCorner	9965.39	323.069	3.143663e+000	3.131428e+000	53	23	1.141746e+001	0	0	0	0	0	0	-5.83593	0	0	65	27.9615
DATA	1535	19	5	0	0	A_44_P198705	NM_012578	9990.6	323.357	1.354836e+004	1.354840e+003	12591	27.5	5.025476e+000	0	0	0	0	0	0	12773.1	1	1	47.2035	27.7273
DATA	1536	19	6	0	0	A_42_P604252	NM_001108797	10015.7	323.605	8.601333e+002	8.606926e+001	864	27.5	4.995159e+000	0	0	0	0	0	0	814.611	1	1	49.5074	27.625
DATA	1537	19	7	0	0	A_43_P20016	NM_001107377	10041.4	323.427	9.515956e+001	1.000468e+001	149	29	6.864985e+000	0	0	0	0	0	0	90.5171	1	1	57.5363	27.9688
DATA	1538	19	8	0	0	A_42_P491486	NM_022533	10066.4	323.521	4.891089e+003	4.891186e+002	4594	31	5.388306e+000	0	0	0	0	0	0	4671.32	1	1	48.2044	31.0769
DATA	1539	19	9	0	0	A_64_P345929	NM_001191639	10091.9	322.913	2.259039e+001	3.807276e+000	80	28.5	7.197142e+000	0	0	0	0	0	0	21.6571	1	1	46.8651	27.8333
DATA	1540	19	10	0	0	A_64_P152047	NM_001000521	10117.5	322.912	1.273621e+001	3.308462e+000	71	30	8.096063e+000	0	0	0	0	0	0	12.2546	1	0	47.2035	29.2903
DATA	1541	19	11	0	0	A_42_P724510	NM_001007625	10142.7	323.222	1.590398e+004	1.590401e+003	14976.5	29	8.054502e+000	0	0	0	0	0	0	15354.8	1	1	47.5395	29
DATA	1542	19	12	0	0	A_42_P552906	NM_001007701	10168.1	323.145	2.020060e+003	2.020287e+002	1991	29	7.115153e+000	0	0	0	0	0	0	1956.43	1	1	46.8651	29.0556
DATA	1543	19	13	0	0	A_64_P121673	A_64_P121673	10193.2	323.667	7.987393e+000	3.128318e+000	67	30	5.312424e+000	0	0	0	0	0	0	7.75872	1	0	47.5395	29.1143
DATA	1544	19	14	0	0	A_64_P047470	NM_001008875	10219.1	323.5	5.675276e+001	6.427091e+000	115	28	6.770131e+000	0	0	0	0	0	0	55.2782	1	1	56.9804	27.3125
DATA	1545	19	15	0	0	A_43_P14911	NM_031512	10244.5	323.5	6.733261e+001	7.375019e+000	128	29	7.920084e+000	0	0	0	0	0	0	65.7446	1	1	57.5363	28.4857
DATA	1546	19	16	0	0	A_44_P117234	NM_001191788	10269.9	323.5	3.107534e+001	4.320941e+000	93	26	7.286701e+000	0	0	0	0	0	0	30.4103	1	1	56.9804	26.6579
DATA	1547	19	17	0	0	A_64_P066782	ENSRNOT00000046676	10295.4	323.427	5.546274e+002	5.554362e+001	609	30	9.804568e+000	0	0	0	0	0	0	543.849	1	1	57.5363	30.2308
DATA	1548	19	18	0	0	A_64_P125013	NM_019167	10320.6	323.427	5.481890e+004	5.481891e+003	53541	32	8.157018e+000	0	0	0	0	0	0	53848.8	1	1	57.5363	32.5862
DATA	1549	19	19	0	0	A_64_P143121	NM_001099510	10346.1	323.5	1.298773e+001	3.256445e+000	73	26.5	5.707946e+000	0	0	0	0	0	0	12.7781	1	0	65	27.25
DATA	1550	19	20	0	0	A_64_P065600	NM_022954	10371.5	323.5	2.993872e+000	2.982219e+000	57.5	26	6.494408e+000	0	0	0	0	0	0	-5.1254	0	0	57.5363	26.0345
DATA	1551	19	21	0	0	A_44_P300818	AF030087	10396.4	323.521	9.924378e+002	9.928848e+001	1023	29	5.153824e+000	0	0	0	0	0	0	978.825	1	1	48.2044	27.5238
DATA	1552	19	22	0	0	A_64_P103130	A_64_P103130	10422.1	323.648	2.638428e+003	2.638596e+002	2775.5	27	8.237205e+000	0	0	0	0	0	0	2604.7	1	1	47.8731	27.2051
DATA	1553	19	23	0	0	A_64_P064938	NM_001109332	10447.5	323.5	7.503956e+000	3.067242e+000	67	29.5	9.937253e+000	0	0	0	0	0	0	7.41313	1	0	57.5363	29.6563
DATA	1554	19	24	0	0	A_64_P087276	NM_138527	10473.1	323.5	2.984160e+000	2.972546e+000	53.5	33	8.952777e+000	0	0	0	0	0	0	-7.9963	0	0	56.9804	33.9063
DATA	1555	19	25	0	0	A_64_P032728	NM_001037778	10498	323.278	1.850177e+004	1.850179e+003	17629	30	8.216775e+000	0	0	0	0	0	0	18291.7	1	1	47.8731	30.65
DATA	1556	19	26	0	0	A_44_P956203	NM_001134992	10523.7	323.5	1.813440e+001	3.481091e+000	78.5	31	6.709672e+000	0	0	0	0	0	0	17.9306	1	1	57.5363	30.6552
DATA	1557	19	27	0	0	A_64_P106488	A_64_P106488	10549.3	323.5	5.569948e+001	6.313147e+000	117	32	7.345138e+000	0	0	0	0	0	0	55.067	1	1	57.5363	32.3929
DATA	1558	19	28	0	0	A_43_P10011	NM_001025274	10574.2	323.575	7.850747e+002	7.856373e+001	838	29	8.148242e+000	0	0	0	0	0	0	775.927	1	1	48.5334	30.9231
DATA	1559	19	29	0	0	A_44_P321009	NM_012540	10600	323.545	6.413355e+000	3.042586e+000	69	31	9.235851e+000	0	0	0	0	0	0	6.33532	1	0	55.8519	32.4103
DATA	1560	19	30	0	0	A_44_P133453	XM_236776	10625.1	323.743	3.722192e+003	3.722311e+002	3607	32	6.720344e+000	0	0	0	0	0	0	3674.43	1	1	48.2044	31.6857
DATA	1561	19	31	0	0	A_64_P027323	NM_001000088	10650.7	323.5	1.455043e+002	1.485225e+001	189	31	7.232249e+000	0	0	0	0	0	0	143.504	1	1	57.5363	30.6552
DATA	1562	19	32	0	0	A_44_P374568	NM_001107778	10675.7	324.116	4.454081e+002	4.464052e+001	490.5	34.5	1.139463e+001	0	0	0	0	0	0	438.849	1	1	46.1809	34.9688
DATA	1563	19	33	0	0	A_64_P040176	NM_001108498	10701.3	323.627	2.347545e+003	2.347735e+002	2294	28.5	6.829954e+000	0	0	0	0	0	0	2309.9	1	1	49.1849	29.2
DATA	1564	19	34	0	0	A_64_P347204	ENSRNOT00000002350	10727	323.545	1.573803e+002	1.601961e+001	216	27.5	6.500309e+000	0	0	0	0	0	0	154.628	1	1	55.8519	29.4333
DATA	1565	19	35	0	0	A_64_P142544	A_64_P142544	10752.4	323.573	1.477802e+001	3.339931e+000	76	28.5	7.694782e+000	0	0	0	0	0	0	14.496	1	0	57.5363	29.625
DATA	1566	19	36	0	0	A_64_P047367	NM_017050	10777.6	323.573	6.413719e+004	6.413720e+003	62620.5	32	8.015226e+000	0	0	0	0	0	0	62800.9	1	1	57.5363	32.6207
DATA	1567	19	37	0	0	A_64_P130858	NM_001003705	10803.4	323.573	1.015454e+002	1.059030e+001	159.5	29.5	9.983253e+000	0	0	0	0	0	0	99.2302	1	1	65	31.0357
DATA	1568	19	38	0	0	A_42_P647009	NM_053814	10828.1	324.328	2.826494e+003	2.826654e+002	2766.5	32	1.227140e+001	0	0	0	0	0	0	2756.57	1	1	45.1352	33.0714
DATA	1569	19	39	0	0	A_42_P618538	NM_001030031	10853.6	323.843	1.422441e+003	1.422761e+002	1433	25	6.248744e+000	0	0	0	0	0	0	1383.96	1	1	47.5395	26.2414
DATA	1570	19	40	0	0	A_64_P048225	NM_001108643	10879.5	324.045	2.713501e+001	4.065394e+000	86	25.5	6.692813e+000	0	0	0	0	0	0	26.3352	1	1	45.1352	25.7368
DATA	1571	19	41	0	0	A_64_P044826	A_64_P044826	10904.6	324.23	1.451057e+002	1.482458e+001	201.5	25	6.398005e+000	0	0	0	0	0	0	140.467	1	1	43.7019	23.6296
DATA	1572	19	42	0	0	A_64_P046273	NM_001168559	10929.6	324	2.617877e+002	2.635509e+001	309	27	6.457026e+000	0	0	0	0	0	0	252.72	1	1	48.5334	27.4545
DATA	1573	19	43	0	0	A_43_P16232	NM_024395	10955.1	323.896	1.709752e+003	1.710025e+002	1699	27.5	7.923353e+000	0	0	0	0	0	0	1645.67	1	1	46.8651	27.6316
DATA	1574	19	44	0	0	A_44_P147356	XM_225859	10980.9	324.262	1.493464e+004	1.493467e+003	14458.5	30	6.468800e+000	0	0	0	0	0	0	14330.7	1	1	44.7812	30.0857
DATA	1575	19	45	0	0	A_44_P979417	ENSRNOT00000068382	11006.4	323.573	2.920566e+001	4.238773e+000	90	31	7.771605e+000	0	0	0	0	0	0	27.9316	1	1	57.5363	30.7419
DATA	1576	19	46	0	0	A_44_P283784	NM_001107682	11031.4	323.919	4.069115e+002	4.080771e+001	440.5	31.5	9.757080e+000	0	0	0	0	0	0	387.898	1	1	49.1849	31.3438
DATA	1577	19	47	0	0	A_44_P112061	ENSRNOT00000046359	11057.1	323.935	6.082513e+002	6.090372e+001	621	33	7.188181e+000	0	0	0	0	0	0	577.786	1	1	54.4085	34.2069
DATA	1578	19	48	0	0	A_42_P541025	NM_212546	11082.4	324	3.352915e+002	3.367253e+001	381	33.5	7.881917e+000	0	0	0	0	0	0	317.355	1	1	48.5334	34.2692
DATA	1579	19	49	0	0	A_44_P156521	NM_001025135	11107.6	323.931	1.015987e+003	1.016465e+002	1005	29.5	5.998467e+000	0	0	0	0	0	0	958.057	1	1	53.8203	29.4667
DATA	1580	19	50	0	0	A_42_P562202	NM_001107959	11133	323.919	5.094465e+001	5.977999e+000	110	27	7.780638e+000	0	0	0	0	0	0	47.8545	1	1	46.8651	28.3529
DATA	1581	19	51	0	0	A_42_P522899	NM_021578	11158.4	323.973	1.039359e+002	1.085762e+001	157	30	7.359219e+000	0	0	0	0	0	0	97.2431	1	1	48.5334	30.3913
DATA	1582	19	52	0	0	A_42_P581060	NM_001108722	11183.4	323.973	1.276692e+004	1.276696e+003	11557	31	9.432545e+000	0	0	0	0	0	0	11896.7	1	1	48.5334	31.5172
DATA	1583	19	53	0	1	ERCC-00043_129	ERCC-00043_129	11209.5	324	3.178933e+000	3.166560e+000	59.5	31	7.543058e+000	0	0	0	0	0	0	-3.22656	0	0	54.1152	31.9091
DATA	1584	19	54	0	0	A_64_P098577	A_64_P098577	11234.5	324	3.192448e+000	3.180023e+000	60	30	7.736825e+000	0	0	0	0	0	0	-1.33208	0	0	54.1152	31.5385
DATA	1585	19	55	0	0	A_64_P043164	ENSRNOT00000009696	11260.5	324	4.866020e+002	4.876494e+001	503	31	1.035170e+001	0	0	0	0	0	0	447.549	1	1	54.1152	32.1892
DATA	1586	19	56	0	0	A_42_P576446	NM_001107673	11285	324.203	4.696116e+003	4.696225e+002	4212	30	9.593922e+000	0	0	0	0	0	0	4300.65	1	1	46.8651	31.72
DATA	1587	19	57	0	0	A_42_P801593	NM_001134744	11310.6	324	2.091765e+003	2.092013e+002	1931	27	9.228887e+000	0	0	0	0	0	0	1906.69	1	1	50.4627	29.7879
DATA	1588	19	58	0	0	A_42_P535743	NM_199393	11336.1	324.104	4.348315e+003	4.348435e+002	3899	25	6.610771e+000	0	0	0	0	0	0	3945.12	1	1	46.8651	26.7667
DATA	1589	19	59	0	0	A_64_P051890	ENSRNOT00000056631	11361.6	324.086	6.853224e+001	7.586432e+000	125.5	27	8.697573e+000	0	0	0	0	0	0	61.8814	1	1	47.8731	29.1724
DATA	1590	19	60	0	0	A_64_P098379	NM_001013890	11387.5	324	2.306844e+001	4.001775e+000	83	31	6.855027e+000	0	0	0	0	0	0	20.7268	1	1	65	30.4839
DATA	1591	19	61	0	0	A_64_P144513	XR_086096	11412.5	324	6.683238e+004	6.683239e+003	59538	32	7.848959e+000	0	0	0	0	0	0	59759.2	1	1	54.1152	31.6154
DATA	1592	19	62	0	0	A_44_P325337	NM_001030041	11438	324	1.287140e+002	1.328825e+001	176.5	30	8.894560e+000	0	0	0	0	0	0	114.519	1	1	54.9904	31.9118
DATA	1593	19	63	0	0	A_44_P142029	NM_001002851	11463.1	324.192	7.868340e+003	7.868410e+002	6806.5	29	7.617153e+000	0	0	0	0	0	0	6966.11	1	1	47.5395	28.9189
DATA	1594	19	64	0	0	A_44_P292568	NM_001000207	11488.6	324.027	1.824390e+002	1.854632e+001	225	30	7.470302e+000	0	0	0	0	0	0	160.695	1	1	48.5334	31.3448
DATA	1595	19	65	0	0	A_42_P624092	XR_007263	11513.5	324	8.979055e+003	8.979117e+002	7171.5	33	7.091720e+000	0	0	0	0	0	0	7869.09	1	1	48.5334	32.2609
DATA	1596	19	66	0	0	A_42_P597322	NM_001103357	11539.4	323.973	6.118981e+002	6.128255e+001	577	30.5	6.771085e+000	0	0	0	0	0	0	533.428	1	1	48.5334	30.9706
DATA	1597	19	67	0	0	A_64_P034409	NM_001108146	11564.9	324.386	2.381458e+003	2.381699e+002	2151	31.5	9.746441e+000	0	0	0	0	0	0	2065.42	1	1	57.259	33.2
DATA	1598	19	68	0	0	A_64_P112797	NM_001001121	11590.2	324.356	3.794151e+002	3.809402e+001	393	31	9.624025e+000	0	0	0	0	0	0	327.345	1	1	48.5334	33.2857
DATA	1599	19	69	0	0	A_42_P761023	NM_001144870	11615.5	324.394	3.276743e+002	3.294576e+001	327	32	8.542670e+000	0	0	0	1	0	0	281.229	1	1	47.8731	32.1481
DATA	1600	19	70	0	0	A_42_P465408	NM_031647	11640.6	324.311	8.302454e+002	8.309583e+001	736.5	35	1.186885e+001	0	0	0	1	0	0	708.842	1	1	48.5334	34.5
DATA	1601	19	71	0	0	A_64_P115761	NM_001109379	11666.2	324.329	3.255813e+001	4.750759e+000	90	34	8.181659e+000	0	0	0	0	0	0	27.6491	1	1	49.5074	33.9211
DATA	1602	19	72	0	0	A_64_P086487	A_64_P086487	11692	324.455	4.143018e+000	3.502891e+000	65.5	33	8.968062e+000	0	0	0	0	0	0	3.49951	1	0	65	32.6364
DATA	1603	19	73	0	0	A_42_P774028	NM_001017447	11716.8	324.26	3.051154e+003	3.051354e+002	2497.5	35.5	6.318735e+000	0	0	0	0	0	0	2563.77	1	1	48.5334	35.4063
DATA	1604	19	74	0	0	A_44_P233080	ENSRNOT00000026303	11742.6	324.222	7.900545e+003	7.900623e+002	6536.5	34	7.939032e+000	0	0	0	0	0	0	6602.7	1	1	47.8731	33.5625
DATA	1605	19	75	0	0	A_64_P078002	ENSRNOT00000056206	11768.1	324.5	2.553319e+001	4.359944e+000	84	29.5	9.864352e+000	0	0	0	0	0	0	21.2269	1	1	65	31.2813
DATA	1606	19	76	0	0	A_64_P047888	A_64_P047888	11793.4	324.378	1.351062e+001	3.801093e+000	73	29	6.494083e+000	0	0	0	0	0	0	11.1726	1	0	49.1849	28.3429
DATA	1607	19	77	0	0	A_44_P236001	NM_001000623	11818.9	324.5	1.010124e+002	1.071406e+001	146	29	1.076776e+001	0	0	0	0	0	0	83.0944	1	1	56.9804	30.7692
DATA	1608	19	78	0	0	A_42_P819040	TC636720	11844.4	324.427	3.604539e+000	3.605412e+000	65.5	28	1.136157e+001	0	0	0	1	0	0	2.67959	0	0	65	31.9091
DATA	1609	19	79	0	0	A_44_P168184	NM_001166675	11869.6	324.427	8.626210e+002	1.208286e+002	481	29	7.905308e+000	0	1	0	0	0	0	702.232	1	1	57.5363	29.3902
DATA	1610	19	80	0	0	A_64_P094925	NM_001024748	11894.9	324.5	4.918094e+002	4.931454e+001	477.5	29	5.534932e+000	0	0	0	0	0	0	398.319	1	1	47.2035	29.7241
DATA	1611	19	81	0	0	A_44_P332483	NM_173338	11920.5	324.5	1.232243e+001	3.848992e+000	71	30	7.893195e+000	0	0	0	0	0	0	9.9286	1	0	57.5363	30.1429
DATA	1612	19	82	0	0	A_42_P530071	NM_001107153	11945.5	324.432	8.307358e+003	8.307439e+002	6392	29.5	8.847921e+000	0	0	0	1	0	0	6660.1	1	1	49.1849	29.7143
DATA	1613	19	83	66	1	DarkCorner	DarkCorner	11971.3	324.716	3.697465e+000	3.683074e+000	56	30	8.077581e+000	0	0	0	0	0	0	-6.79005	0	0	48.2044	30.2258
DATA	1614	19	84	66	1	DarkCorner	DarkCorner	11996.8	324.48	3.716086e+000	3.701622e+000	58	30	9.367598e+000	0	0	0	0	0	0	-4.40266	0	0	49.1849	31.2424
DATA	1615	19	85	66	1	DarkCorner	DarkCorner	12021.6	324.655	3.733574e+000	3.719043e+000	57.5	32	9.332335e+000	0	0	0	0	0	0	-4.75163	0	0	52.3208	32.3226
DATA	1616	20	1	66	1	DarkCorner	DarkCorner	9901.42	330.297	3.181478e+000	3.169096e+000	56	28.5	6.213401e+000	0	0	0	0	0	0	-1.64511	0	0	48.5334	27.7222
DATA	1617	20	2	66	1	DarkCorner	DarkCorner	9927.03	330.13	3.164329e+000	3.152013e+000	56	29	6.789815e+000	0	0	0	0	0	0	-4.69292	0	0	46.8651	28.8889
DATA	1618	20	3	66	1	DarkCorner	DarkCorner	9952.5	330.5	3.147858e+000	3.135606e+000	53	23.5	1.011906e+001	0	0	0	0	0	0	-6.26246	0	0	65	27.1333
DATA	1619	20	4	0	0	A_42_P787775	NM_001127566	9977.5	330.288	5.851667e+002	5.859982e+001	609	28	9.684775e+000	0	0	0	0	0	0	550.931	1	1	46.5243	29.5556
DATA	1620	20	5	0	0	A_42_P607770	NM_001134616	10002.7	330.778	9.358828e+003	9.358880e+002	8708	28.5	4.487018e+000	0	0	0	0	0	0	8852.9	1	1	47.5395	28.7333
DATA	1621	20	6	0	0	A_42_P484738	NM_022266	10028.6	330.74	1.311288e+003	1.311652e+002	1288.5	29	5.354203e+000	0	0	0	0	0	0	1245.99	1	1	49.5074	28.1034
DATA	1622	20	7	0	0	A_64_P075273	NM_031743	10054	330.545	3.583987e+002	3.597190e+001	398	31	7.593673e+000	0	0	0	0	0	0	341.971	1	1	65	30.4286
DATA	1623	20	8	0	0	A_42_P674050	NM_001107225	10079.5	331	7.147126e+003	7.147192e+002	6737	31	7.617608e+000	0	0	0	0	0	0	6847.06	1	1	48.5334	29.8065
DATA	1624	20	9	1028	1	(+)E1A_r60_a107	E1A_r60_a107	10104.6	330.573	5.416538e+000	3.103388e+000	66	29	7.848095e+000	0	0	0	0	0	0	5.20788	1	0	57.5363	28.8519
DATA	1625	20	10	0	0	A_64_P144253	NM_201350	10130.4	330.573	2.701344e+001	4.070508e+000	83.5	31	6.555799e+000	0	0	0	0	0	0	26.0649	1	1	57.5363	28.3871
DATA	1626	20	11	0	0	A_44_P791729	NM_181377	10155.1	330.77	8.864758e+003	8.864810e+002	8911	29	7.845020e+000	0	0	0	0	0	0	8580.73	1	1	44.7812	30.5172
DATA	1627	20	12	0	0	A_42_P550624	NM_001109319	10180.7	330.662	2.435265e+003	2.435453e+002	2350.5	29	6.694088e+000	0	0	0	0	0	0	2364.39	1	1	48.5334	28.5405
DATA	1628	20	13	0	0	A_43_P11580	NM_012833	10206.1	330.727	1.911637e+002	1.935308e+001	246	29	6.188607e+000	0	0	0	0	0	0	186.12	1	1	49.5074	29.3333
DATA	1629	20	14	0	0	A_44_P417055	XM_223442	10231.6	330.753	9.351624e+002	9.356466e+001	952	28	7.541017e+000	0	0	0	0	0	0	912.835	1	1	48.5334	27.6875
DATA	1630	20	15	0	0	A_64_P142867	A_64_P142867	10257	331.226	9.912443e+003	9.912488e+002	9684	27.5	7.251037e+000	0	0	0	0	0	0	9698.97	1	1	45.4864	27.2941
DATA	1631	20	16	0	0	A_64_P013002	XM_001072551	10282.6	331	1.674464e+001	3.432548e+000	77	29	9.729680e+000	0	0	0	0	0	0	16.4184	1	1	44.0646	30
DATA	1632	20	17	0	0	A_42_P457692	NM_001008363	10308	330.545	5.350144e+003	5.350227e+002	5152	31.5	5.929926e+000	0	0	0	0	0	0	5255.52	1	1	55.8519	30.1429
DATA	1633	20	18	0	0	A_42_P788480	NM_019194	10333.4	331.155	7.769507e+003	7.769565e+002	7424	30	7.833898e+000	0	0	0	0	0	0	7645.39	1	1	47.5395	30.7188
DATA	1634	20	19	0	0	A_42_P518462	NM_001007020	10358.8	330.806	6.866074e+003	6.866139e+002	6760	27	5.576967e+000	0	0	0	0	0	0	6765.88	1	1	47.5395	27.1111
DATA	1635	20	20	0	0	A_64_P007578	NM_001000851	10384.4	330.931	7.495876e+000	3.070704e+000	68	26.5	6.316387e+000	0	0	0	0	0	0	7.39576	1	0	53.8203	27.625
DATA	1636	20	21	0	0	A_64_P139350	NM_001191727	10409.2	330.971	3.927962e+001	4.927326e+000	100.5	29	7.864020e+000	0	0	0	0	0	0	38.7937	1	1	46.8651	29.697
DATA	1637	20	22	0	0	A_64_P100442	ENSRNOT00000067861	10434.9	330.935	1.873693e+002	1.897124e+001	249	30	9.677923e+000	0	0	0	0	0	0	185.202	1	1	54.4085	30.7073
DATA	1638	20	23	1028	1	(+)E1A_r60_a135	E1A_r60_a135	10460.5	331	2.982219e+000	2.970612e+000	58	34	8.375959e+000	0	0	0	0	0	0	-3.82191	0	0	54.1152	33.1852
DATA	1639	20	24	0	0	A_44_P459760	NM_001108187	10485.5	331	4.029766e+001	5.005675e+000	97.5	29	8.108713e+000	0	0	0	0	0	0	39.8711	1	1	54.1152	31.4138
DATA	1640	20	25	0	0	A_64_P115536	NM_212545	10511.4	330.931	2.980536e+000	2.978172e+000	63.5	30	7.162738e+000	0	0	0	0	0	0	2.31936	0	0	53.8203	31.7059
DATA	1641	20	26	0	0	A_44_P538406	NM_013102	10536.4	330.73	1.670555e+004	1.670558e+003	16118	31	6.301927e+000	0	0	0	0	0	0	16531	1	1	47.8731	32
DATA	1642	20	27	0	0	A_64_P120871	NM_198743	10562	331	9.685182e+002	9.689733e+001	982	29	8.423789e+000	0	0	0	0	0	0	958.222	1	1	54.9904	31.0909
DATA	1643	20	28	0	0	A_44_P173048	NM_001009255	10586.9	330.986	1.554722e+003	1.555005e+002	1554	29.5	7.460470e+000	0	0	0	0	0	0	1537.57	1	1	46.8651	30.2632
DATA	1644	20	29	0	0	A_64_P058060	NM_001037541	10612.6	330.973	2.143835e+001	3.665043e+000	81	30.5	7.564400e+000	0	0	0	0	0	0	21.1889	1	1	49.1849	31.1471
DATA	1645	20	30	0	0	A_64_P145982	NM_001109366	10638	331	3.805753e+001	4.830561e+000	98	29	6.587740e+000	0	0	0	0	0	0	37.5848	1	1	54.9904	28.6857
DATA	1646	20	31	0	0	A_42_P514244	NM_012791	10663.2	331.194	1.967578e+002	1.989984e+001	250	31.5	7.368775e+000	0	0	0	0	0	0	194.129	1	1	47.5395	31.3333
DATA	1648	20	33	0	0	A_64_P159155	XM_001071429	10714.5	331	2.577144e+001	3.943958e+000	84	26	4.833432e+000	0	0	0	0	0	0	25.3619	1	1	54.1152	26.8276
DATA	1649	20	34	0	0	A_64_P030272	ENSRNOT00000041731	10739.5	330.901	2.183643e+002	2.204019e+001	270.5	31	7.459744e+000	0	0	0	0	0	0	214.567	1	1	47.8731	30.8276
DATA	1650	20	35	0	0	A_42_P733076	NM_001033867	10765.1	331.065	3.231688e+002	3.245537e+001	374	30	7.080035e+000	0	0	0	0	0	0	317.011	1	1	54.4085	30.2424
DATA	1651	20	36	0	0	A_44_P349475	NM_031333	10790.4	331.127	8.061336e+002	8.066919e+001	830	28	7.632637e+000	0	0	0	0	0	0	789.302	1	1	47.5395	28.9143
DATA	1652	20	37	0	0	A_64_P009848	NM_001034135	10815.6	331	5.159498e+003	5.159586e+002	5061	28	1.224745e+001	0	0	0	0	0	0	5041.43	1	1	49.8279	31.6
DATA	1653	20	38	0	0	A_64_P116685	NM_001166763	10841.2	331.103	4.459887e+003	4.459988e+002	4454	24	8.351760e+000	0	0	0	0	0	0	4348.2	1	1	46.5243	26.7576
DATA	1654	20	39	0	0	A_64_P072659	NM_001109296	10866.1	330.828	1.654788e+003	1.655064e+002	1676	29	6.125028e+000	0	0	0	0	0	0	1609.53	1	1	45.4864	28.1143
DATA	1655	20	40	0	0	A_42_P808442	NM_001108759	10892	331.455	4.275373e+002	4.286084e+001	483	24	7.963877e+000	0	0	0	1	0	0	414.807	1	1	55.8519	24.56
DATA	1656	20	41	0	0	A_64_P140836	NM_001017486	10917.3	331.333	1.544261e+002	1.573829e+001	205	27	4.788995e+000	0	0	0	0	0	0	149.425	1	1	48.8603	28.3704
DATA	1657	20	42	0	0	A_64_P034384	NM_019227	10942.6	331.427	2.488734e+002	2.507292e+001	301	25	7.353236e+000	0	0	0	0	0	0	240.137	1	1	57.5363	26.8485
DATA	1658	20	43	0	0	A_42_P730411	NM_001012181	10968.1	331	6.526889e+002	6.534031e+001	669	31	1.010962e+001	0	0	0	0	0	0	627.859	1	1	46.8651	32.275
DATA	1659	20	44	0	0	A_44_P396450	ENSRNOT00000018433	10993.2	330.939	1.663325e+002	1.691306e+001	218	31	5.649547e+000	0	0	0	0	0	0	159.508	1	1	45.835	31.9259
DATA	1660	20	45	0	0	A_44_P268610	NM_001109134	11018.7	331.42	6.180321e+003	6.180397e+002	5813	32	8.792358e+000	0	0	0	0	0	0	5907.75	1	1	52.3208	31.25
DATA	1661	20	46	0	0	A_64_P059105	NM_001134544	11044.4	331.427	1.032655e+002	1.077729e+001	153	32	9.005136e+000	0	0	0	0	0	0	98.3717	1	1	57.5363	32.3226
DATA	1662	20	47	0	0	A_42_P524851	NM_001130061	11069.5	331.296	1.342472e+003	1.342829e+002	1295.5	34	5.910040e+000	0	0	0	0	0	0	1274.38	1	1	47.8731	35.8571
DATA	1663	20	48	0	0	A_64_P141675	FM127585	11094.8	331.26	4.443353e+003	4.443462e+002	4147.5	33	6.308191e+000	0	0	0	0	0	0	4202.57	1	1	48.5334	30.8286
DATA	1664	20	49	0	0	A_64_P002979	ENSRNOT00000034762	11120.9	331.013	3.130808e+000	3.118622e+000	58.5	27	7.272041e+000	0	0	0	0	0	0	-2.43838	0	0	46.8651	28.1515
DATA	1665	20	50	0	0	A_44_P175822	NM_001109511	11146	331.455	1.359004e+002	1.394593e+001	184	29	7.694449e+000	0	0	0	0	0	0	127.547	1	1	55.8519	30.2727
DATA	1666	20	51	0	0	A_44_P1008751	NM_001137645	11171.3	330.942	1.839426e+002	1.866089e+001	237	26	6.801225e+000	0	0	0	0	0	0	171.933	1	1	46.1809	26.56
DATA	1667	20	52	0	0	A_44_P255350	NM_001007674	11196.4	331.186	3.473989e+002	3.488295e+001	383	31	7.936749e+000	0	0	0	0	0	0	323.409	1	1	47.5395	32.0882
DATA	1668	20	53	0	0	A_64_P017328	NM_012758	11222.3	331.5	8.249218e+002	8.255305e+001	832	29	6.567760e+000	0	0	0	0	0	0	764.677	1	1	57.5363	29.2759
DATA	1669	20	54	0	0	A_64_P132571	NM_001107703	11247.1	331.382	8.452996e+003	8.453056e+002	7808	28	7.044048e+000	0	0	0	0	0	0	7802.52	1	1	46.1809	28.2162
DATA	1670	20	55	0	0	A_44_P107535	NM_001170336	11272.9	331.5	6.491182e+002	6.499052e+001	661.5	31	1.043564e+001	0	0	0	0	0	0	596.485	1	1	56.9804	32.5429
DATA	1671	20	56	0	0	A_44_P353618	NM_053587	11297.9	331.347	6.143096e+001	6.931983e+000	120	30	7.651871e+000	0	0	0	0	0	0	56.1972	1	1	49.1849	30.6364
DATA	1672	20	57	0	0	A_44_P213336	A_44_P213336	11323.8	331.225	3.345325e+002	3.360851e+001	369	25	7.846100e+000	0	0	0	0	0	0	304.591	1	1	47.2035	28.1935
DATA	1673	20	58	0	0	A_42_P507072	FQ213070	11348.9	331.329	3.502004e+003	3.502154e+002	3089	27	6.174679e+000	0	0	0	0	0	0	3173.86	1	1	51.7088	27.28
DATA	1674	20	59	0	0	A_44_P428886	NM_001099516	11374.6	330.969	4.641456e+002	4.652874e+001	489.5	28	7.079686e+000	0	0	0	0	0	0	418.607	1	1	44.7812	29.3171
DATA	1675	20	60	0	0	A_64_P086784	NM_001108657	11399.9	331.237	4.079563e+003	4.079694e+002	3551.5	32	7.343775e+000	0	0	0	0	0	0	3661.76	1	1	49.1849	31
DATA	1676	20	61	0	0	A_42_P654682	NM_012724	11425.4	331.573	2.393903e+001	4.068143e+000	85	29.5	8.958687e+000	0	0	0	1	0	0	21.3831	1	1	57.5363	32.5
DATA	1677	20	62	0	0	A_44_P443008	NM_001013068	11450.6	331.466	5.561551e+002	5.571366e+001	546	27.5	6.155288e+000	0	0	0	0	0	0	494.327	1	1	49.1849	28.9643
DATA	1678	20	63	0	0	A_64_P027229	A_64_P027229	11475.8	331.548	1.490567e+003	1.490938e+002	1384	29	7.920772e+000	0	0	0	0	0	0	1318.28	1	1	48.2044	29.3636
DATA	1679	20	64	0	0	A_64_P134277	ENSRNOT00000029167	11501.5	331.5	8.920576e+001	9.525047e+000	144	30	7.524181e+000	0	0	0	0	0	0	78.4903	1	1	57.5363	32.5517
DATA	1680	20	65	0	0	A_64_P165548	XM_001055860	11526.3	331.565	1.086999e+002	1.137621e+001	159	31	6.045579e+000	0	0	0	0	0	0	95.1679	1	1	46.8651	31.2353
DATA	1681	20	66	0	0	A_64_P014737	NM_001000069	11552.4	331.573	6.098757e+000	3.428360e+000	67	32	6.864272e+000	0	0	0	0	0	0	5.31123	1	0	57.5363	33.7586
DATA	1682	20	67	0	0	A_42_P627330	NM_001106628	11577.2	331.606	5.006912e+002	5.018380e+001	492	32.5	9.621835e+000	0	0	0	0	0	0	433.832	1	1	47.5395	34.3333
DATA	1683	20	68	0	0	A_64_P039452	NM_001109063	11602.8	331.508	3.177598e+002	3.195830e+001	346	32	8.122745e+000	0	0	0	0	0	0	273.879	1	1	45.4864	33.5135
DATA	1684	20	69	0	0	A_44_P516885	ENSRNOT00000005601	11628.4	331.573	5.602595e+004	5.602596e+003	46961	33	7.677735e+000	0	0	0	0	0	0	48034.8	1	1	57.5363	32.619
DATA	1685	20	70	0	0	A_44_P839176	NM_001107114	11653.6	332.099	2.344767e+003	2.345020e+002	2060	30	9.329364e+000	0	0	0	0	0	0	2000.12	1	1	47.8731	32.037
DATA	1686	20	71	0	0	A_64_P083342	AABR03026150	11678.8	331.831	2.929193e+001	4.535381e+000	89	33	8.861051e+000	0	0	0	0	0	0	24.8545	1	1	47.2035	34.4615
DATA	1687	20	72	0	0	A_42_P618185	NM_001108486	11704.1	331.644	3.792883e+003	3.793042e+002	3123.5	33	8.902086e+000	0	0	0	1	0	0	3201.23	1	1	48.5334	32.8333
DATA	1688	20	73	0	0	A_42_P619957	NM_053830	11730	331.545	1.777565e+002	1.811693e+001	208.5	33	7.204244e+000	0	0	0	1	0	0	149.219	1	1	65	34.1316
DATA	1689	20	74	0	0	A_44_P375042	NM_001014243	11755	331.631	4.380606e+002	4.394710e+001	420	30	9.252375e+000	0	0	0	0	0	0	365.835	1	1	45.4864	32.1613
DATA	1690	20	75	0	0	A_44_P438053	NM_001004201	11780.6	331.952	1.156748e+002	1.209601e+001	154.5	31.5	6.410969e+000	0	0	0	0	0	0	96.0991	1	1	44.0646	30.7143
DATA	1691	20	76	0	0	A_43_P19181	ENSRNOT00000018440	11806.4	331.573	9.686014e+001	1.031805e+001	145	29	6.981457e+000	0	0	0	0	0	0	80.0335	1	1	57.5363	28
DATA	1692	20	77	0	0	A_42_P664259	NM_024396	11831.5	331.648	4.017681e+004	4.017682e+003	32480	30	1.148730e+001	0	0	0	1	0	0	33027.2	1	1	57.5363	31.3793
DATA	1693	20	78	0	0	A_44_P588645	FQ230244	11856.3	331.917	1.167125e+002	1.221148e+001	159	29	9.402116e+000	0	0	0	0	0	0	95.4645	1	1	43.7019	29.9302
DATA	1694	20	79	0	0	A_64_P030844	XM_001065657	11882.4	332.23	1.266541e+001	3.826355e+000	71.5	29	6.775345e+000	0	0	0	0	0	0	10.306	1	0	48.2044	30.0303
DATA	1695	20	80	0	0	A_64_P054823	A_64_P054823	11907.5	331.916	1.181245e+004	1.181251e+003	9499	31.5	8.174727e+000	0	0	0	0	0	0	9562.66	1	1	49.8279	31.8846
DATA	1696	20	81	0	0	A_42_P516860	XM_001059330	11933.4	331.931	1.105471e+002	1.164107e+001	152	29	8.311535e+000	0	0	0	0	0	0	89.0324	1	1	53.8203	29.4333
DATA	1697	20	82	0	0	A_64_P085772	NM_001191606	11958.2	331.806	1.289481e+002	1.340581e+001	164	30	7.785963e+000	0	0	0	0	0	0	103.342	1	1	47.5395	32.0606
DATA	1698	20	83	66	1	DarkCorner	DarkCorner	11983.8	332.028	3.698448e+000	3.684053e+000	54	29.5	9.858061e+000	0	0	0	0	0	0	-7.46812	0	0	46.8651	31.1842
DATA	1699	20	84	66	1	DarkCorner	DarkCorner	12010.1	332.038	3.717110e+000	3.702643e+000	56	35	1.013048e+001	0	0	0	0	0	0	-5.64121	0	0	49.1849	33.72
DATA	1700	20	85	66	1	DarkCorner	DarkCorner	12034.4	331.671	3.734548e+000	3.720013e+000	60	30.5	8.260445e+000	0	0	0	0	0	0	-1.53518	0	0	47.8731	31.0763
DATA	1701	21	1	66	1	DarkCorner	DarkCorner	9889.12	337.395	3.186180e+000	3.176812e+000	60	24	6.791407e+000	0	0	0	0	0	0	1.28486	0	0	50.7771	24.913
DATA	1702	21	2	66	1	DarkCorner	DarkCorner	9914.07	337.863	3.168844e+000	3.156510e+000	54	29	5.711186e+000	0	0	0	0	0	0	-3.90333	0	0	46.8651	28.5588
DATA	1703	21	3	66	1	DarkCorner	DarkCorner	9939.65	337.654	3.152287e+000	3.140018e+000	55	26	6.374369e+000	0	0	0	0	0	0	-3.25912	0	0	50.7771	26.5152
DATA	1704	21	4	0	0	A_44_P277669	NM_001163736	9964.77	338.273	7.538903e+002	7.545374e+001	758	23	7.177738e+000	0	0	0	0	0	0	708.959	1	1	45.4864	24.9583
DATA	1705	21	5	0	0	A_42_P788480	NM_019194	9990.44	338.466	7.492043e+003	7.492108e+002	7168.5	31.5	4.902903e+000	0	0	0	0	0	0	7079.66	1	1	47.8731	29.9615
DATA	1706	21	6	0	0	A_42_P558354	NM_001007686	10015.8	338.101	3.434412e+003	3.434552e+002	3264	31	6.120332e+000	0	0	0	1	0	0	3259.84	1	1	51.7088	28.5385
DATA	1707	21	7	0	0	A_44_P714409	NM_001047907	10041.2	338.122	3.779027e+003	3.779152e+002	3512	30	5.661984e+000	0	0	0	0	0	0	3602.31	1	1	49.8279	29.4839
DATA	1708	21	8	0	0	A_42_P604331	NM_001108533	10066.5	338	9.956914e+004	9.956914e+003	95716	31	7.948103e+000	0	0	0	0	0	0	95295.1	1	1	54.1152	30.7879
DATA	1709	21	9	0	0	A_64_P139472	NM_173119	10091.9	337.8	3.694272e+003	3.694399e+002	3551	28.5	7.741198e+000	0	0	0	0	0	0	3549.1	1	1	46.8651	28.3846
DATA	1710	21	10	0	0	A_42_P711589	NM_022948	10117.3	338	7.337797e+003	7.337860e+002	6831	27	5.901656e+000	0	0	0	0	0	0	7074.83	1	1	49.1849	27.7273
DATA	1711	21	11	0	0	A_42_P813567	NM_031841	10143	337.913	9.671564e+004	9.671564e+003	92842.5	32	8.375574e+000	0	0	0	0	0	0	93564.8	1	1	49.1849	31.3103
DATA	1712	21	12	0	0	A_42_P647505	TC640289	10168.2	338.194	2.848632e+003	2.848793e+002	2730	29	7.097668e+000	0	0	0	0	0	0	2764.46	1	1	47.5395	30.2424
DATA	1713	21	13	0	0	A_64_P094313	NM_032073	10193.3	338.118	9.083553e+002	9.088569e+001	963	29	7.106855e+000	0	0	0	0	0	0	884.019	1	1	48.8603	29.3103
DATA	1714	21	14	0	0	A_42_P577421	NM_001106819	10218.3	338.12	5.005035e+002	5.014084e+001	525	28	7.551370e+000	0	0	0	0	0	0	488.375	1	1	48.8603	28.5938
DATA	1715	21	15	0	0	A_42_P477311	NM_001013170	10244.2	338.216	1.144421e+004	1.144425e+003	10921	29	7.324281e+000	0	0	0	0	0	0	11194.7	1	1	47.8731	29.7632
DATA	1716	21	16	0	0	A_42_P630249	NM_031824	10269.5	338.25	2.492908e+003	2.493089e+002	2427	30.5	8.435715e+000	0	0	0	0	0	0	2443.95	1	1	47.5395	31.25
DATA	1717	21	17	0	0	A_42_P618256	NM_001024759	10295.2	338	6.513425e+002	6.520289e+001	696	27.5	7.920408e+000	0	0	0	0	0	0	639.815	1	1	46.8651	28.0938
DATA	1718	21	18	0	0	A_64_P101584	A_64_P101584	10320.6	338.092	4.579134e+002	4.588857e+001	511	32.5	1.052152e+001	0	0	0	0	0	0	450.609	1	1	49.1849	32.9643
DATA	1719	21	19	0	0	A_64_P045461	NM_001106750	10346	338	1.821865e+002	1.846093e+001	234	27	5.629845e+000	0	0	0	0	0	0	179.556	1	1	54.9904	27.8148
DATA	1720	21	20	0	0	A_64_P056485	ENSRNOT00000033663	10371.3	338	1.331486e+003	1.331819e+002	1322	26	5.450566e+000	0	0	0	0	0	0	1314	1	1	49.1849	25.9688
DATA	1721	21	21	0	0	A_64_P013077	A_64_P013077	10396.3	338.263	5.420129e+001	6.182313e+000	114	27	8.880128e+000	0	0	0	0	0	0	53.5503	1	1	48.8603	30.24
DATA	1722	21	22	0	0	A_44_P348952	NM_001000368	10422.1	338.417	2.982571e+000	2.970962e+000	57	29.5	9.348244e+000	0	0	0	0	0	0	-4.48304	0	0	43.3362	29.9762
DATA	1723	21	23	0	0	A_64_P147609	NM_001106295	10447.5	338.188	5.298742e+003	5.298826e+002	5239.5	30	9.465259e+000	0	0	0	0	0	0	5243.54	1	1	49.8279	30.3448
DATA	1724	21	24	0	0	A_44_P193928	NM_183328	10472.6	338.225	1.100214e+003	1.100614e+002	1125	29.5	7.276939e+000	0	0	0	0	0	0	1089.29	1	1	47.8731	30.9231
DATA	1725	21	25	0	0	A_44_P441947	XM_001079870	10498.1	338.104	1.087067e+003	1.087472e+002	1133	30	7.917246e+000	0	0	0	0	0	0	1076.57	1	1	46.8651	31.4211
DATA	1726	21	26	0	0	A_42_P666259	NM_001009661	10523.4	338	1.329451e+004	1.329454e+003	12720	31.5	5.506500e+000	0	0	0	0	0	0	13167	1	1	46.5243	31.8077
DATA	1727	21	27	0	0	A_64_P082486	A_64_P082486	10549.1	337.825	1.112808e+003	1.113203e+002	1171.5	30	5.403257e+000	0	0	0	0	0	0	1101.99	1	1	45.4864	29.6765
DATA	1728	21	28	0	0	A_64_P091940	NM_033237	10574.4	338.169	2.084781e+002	2.105798e+001	263.5	29	6.586562e+000	0	0	0	0	0	0	206.395	1	1	47.5395	29.129
DATA	1729	21	29	0	0	A_64_P144899	NM_001107736	10600	338.455	5.471129e+002	5.479180e+001	606	30	7.182465e+000	0	0	0	0	0	0	541.388	1	1	55.8519	30.3659
DATA	1730	21	30	0	0	A_44_P410062	XM_224553	10625.3	338.373	3.178736e+002	3.192591e+001	372	31.5	7.507809e+000	0	0	0	0	0	0	314.326	1	1	49.1849	31.7647
DATA	1731	21	31	0	0	A_42_P489764	NM_001004099	10650.4	338.5	1.957950e+003	1.958176e+002	1929.5	27	6.478085e+000	0	0	0	0	0	0	1934.43	1	1	49.8279	27.0323
DATA	1732	21	32	0	0	A_42_P640277	NM_001003401	10676.4	338.427	3.581299e+004	3.581300e+003	34615	30	8.515388e+000	0	0	0	0	0	0	35343.7	1	1	57.5363	31.6129
DATA	1733	21	33	0	0	A_44_P212850	NM_019305	10701.3	338.187	5.200879e+001	5.994521e+000	113	27.5	4.884040e+000	0	0	0	0	0	0	51.2628	1	1	49.5074	27.4231
DATA	1734	21	34	0	0	A_64_P125506	NM_021677	10726.9	338.333	3.556449e+002	3.568954e+001	407.5	31	6.663809e+000	0	0	0	0	0	0	350.044	1	1	46.5243	29.7778
DATA	1735	21	35	0	0	A_42_P802358	NM_001024341	10751.9	338.417	1.515228e+004	1.515231e+003	14480	31	6.229426e+000	0	0	0	0	0	0	14890.2	1	1	48.2044	31.5667
DATA	1736	21	36	0	0	A_44_P552852	XM_346367	10777.8	338.5	1.672797e+001	3.430622e+000	76.5	31	5.882470e+000	0	0	0	0	0	0	16.409	1	1	51.0895	31.5
DATA	1738	21	38	0	0	A_64_P141187	NM_001108899	10828.5	338.5	6.574068e+000	3.078370e+000	66	26	7.484927e+000	0	0	0	0	0	0	6.42254	1	0	57.5363	26.9
DATA	1739	21	39	0	0	A_44_P274823	NM_001105831	10853.6	338.608	2.142319e+003	2.142531e+002	2132	29	6.747680e+000	0	0	0	0	0	0	2088.26	1	1	49.1849	28.2581
DATA	1740	21	40	0	0	A_42_P804913	ENSRNOT00000022886	10879.2	338.633	6.119754e+001	6.825025e+000	117	29	6.915620e+000	0	0	0	0	0	0	59.5068	1	1	50.4627	28.3226
DATA	1741	21	41	0	0	A_64_P113970	NM_212501	10904.3	338.338	2.685518e+003	2.685689e+002	2674	26.5	5.583198e+000	0	0	0	0	0	0	2604.54	1	1	48.5334	27.2917
DATA	1742	21	42	1028	1	(+)E1A_r60_3	E1A_r60_3	10930.1	338.5	2.100955e+001	3.693531e+000	79	27	6.644836e+000	0	0	0	0	0	0	20.3197	1	1	56.9804	28
DATA	1743	21	43	0	0	A_42_P661992	TC596141	10955.5	338.5	2.375520e+002	2.394976e+001	292	29	8.532633e+000	0	0	0	0	0	0	229.087	1	1	57.5363	30.2895
DATA	1744	21	44	0	0	A_42_P577431	NM_001109422	10980.9	338.5	6.394829e+001	7.087470e+000	122	33	9.680043e+000	0	0	0	0	0	0	61.4823	1	1	56.9804	35.3548
DATA	1745	21	45	0	0	A_44_P524785	NM_001000184	11006.3	338.5	6.559277e+000	3.135024e+000	68	31	6.955495e+000	0	0	0	0	0	0	6.28626	1	0	65	32.9259
DATA	1746	21	46	0	0	A_64_P027634	NM_001000223	11031.3	338.527	5.700938e+001	6.477682e+000	117	34	8.603470e+000	0	0	0	0	0	0	54.4585	1	1	48.8603	33.6552
DATA	1747	21	47	0	0	A_42_P492976	NM_001126099	11057.1	338.5	2.433285e+002	2.452782e+001	283	34	8.729550e+000	0	0	0	0	0	0	231.628	1	1	56.9804	33.8286
DATA	1748	21	48	0	0	A_64_P157479	AABR03127998	11082.2	338.662	7.978859e+003	7.978919e+002	7590	34	6.368990e+000	0	0	0	0	0	0	7568.55	1	1	46.5243	36.7241
DATA	1749	21	49	0	0	A_44_P391706	NM_001007796	11107.7	338.5	2.231225e+002	2.252780e+001	272	32	7.993774e+000	0	0	0	0	0	0	210.859	1	1	57.5363	30.7895
DATA	1750	21	50	0	0	A_44_P184685	NM_001007735	11133.4	338.573	1.251530e+002	1.289857e+001	181	28	8.417212e+000	0	0	0	0	0	0	117.818	1	1	57.5363	29.871
DATA	1751	21	51	0	0	A_44_P475275	NM_001000893	11158.6	338.671	6.936368e+001	7.611154e+000	124	29	8.082456e+000	0	0	0	0	0	0	65.0447	1	1	47.8731	28.75
DATA	1752	21	52	0	0	A_44_P270056	NM_001007800	11183.6	338.568	1.377738e+002	1.413194e+001	189	27	9.174211e+000	0	0	0	0	0	0	128.678	1	1	49.1849	29.3846
DATA	1753	21	53	0	0	A_64_P059351	NM_001145175	11209.5	338.5	1.305190e+002	1.342877e+001	187.5	32	7.983702e+000	0	0	0	0	0	0	121.386	1	1	57.5363	31.7143
DATA	1754	21	54	0	0	A_42_P573441	NM_001105742	11234.5	338.769	6.308088e+003	6.308168e+002	5819	32	7.609091e+000	0	0	0	0	0	0	5842.37	1	1	49.8279	31.2273
DATA	1755	21	55	0	0	A_42_P485589	NM_017246	11259.8	338.712	1.143575e+002	1.187129e+001	164	28	9.829203e+000	0	0	0	0	0	0	105.454	1	1	48.2044	29.1429
DATA	1756	21	56	0	0	A_44_P149540	XM_223051	11285.5	338.882	1.581553e+004	1.581557e+003	14284	30	8.593571e+000	0	0	0	0	0	0	14519.3	1	1	49.8279	30.129
DATA	1757	21	57	0	0	A_44_P323236	NM_001000513	11311	338.545	2.537739e+001	4.096026e+000	85	29	8.792316e+000	0	0	0	0	0	0	23.19	1	1	55.8519	29.7059
DATA	1759	21	59	0	0	A_64_P100447	NM_001173469	11361.3	338.371	5.709320e+001	6.567113e+000	113	33	8.801977e+000	0	0	0	0	0	0	51.6909	1	1	47.5395	32.5938
DATA	1760	21	60	0	0	A_64_P150008	A_64_P150008	11387.4	338.573	1.178726e+002	1.223002e+001	172	31	7.049908e+000	0	0	0	0	0	0	106.2	1	1	57.5363	31.5135
DATA	1761	21	61	0	0	A_42_P481696	NM_022508	11412.3	338.816	2.286043e+003	2.286278e+002	2028	28	6.264032e+000	0	0	0	0	0	0	2049.99	1	1	49.5074	29.1429
DATA	1762	21	62	0	0	A_64_P033755	AABR03073220	11438.1	338.712	1.075386e+002	1.124668e+001	156	28	6.993097e+000	0	0	0	0	0	0	95.9536	1	1	45.835	28.8182
DATA	1763	21	63	0	0	A_64_P115980	NM_001109458	11463.7	339.087	3.108396e+002	3.125959e+001	340.5	28	5.852693e+000	0	0	0	0	0	0	275.989	1	1	46.1809	28.4412
DATA	1764	21	64	0	0	A_64_P001426	NM_001126301	11488.6	338.973	1.741258e+002	1.772728e+001	212.5	27.5	8.844557e+000	0	0	0	0	0	0	153.842	1	1	48.5334	29.1786
DATA	1765	21	65	0	0	A_64_P012987	NM_001108668	11513.8	338.974	1.503471e+003	1.503843e+002	1333	32.5	7.055930e+000	0	0	0	0	0	0	1321.67	1	1	49.1849	32.1154
DATA	1767	21	67	0	0	A_42_P668289	TC585832	11564.7	338.905	3.124611e+003	3.124794e+002	2689	33.5	1.557102e+001	0	0	0	0	0	0	2718.63	1	1	48.8603	37.75
DATA	1768	21	68	0	0	A_64_P052690	ENSRNOT00000036634	11590.1	338.8	6.249264e+002	6.258476e+001	580.5	31	8.170422e+000	0	0	0	0	0	0	540.914	1	1	46.8651	32.8235
DATA	1769	21	69	0	0	A_42_P593020	NM_013413	11615.7	338.811	9.184147e+001	9.797534e+000	136.5	33	9.589584e+000	0	0	0	0	0	0	79.0791	1	1	48.2044	35.037
DATA	1770	21	70	0	0	A_64_P037303	NM_001127530	11640.5	338.944	1.022941e+003	1.023516e+002	908	29.5	8.750139e+000	0	0	0	0	0	0	876.332	1	1	48.5334	31.2273
DATA	1771	21	71	0	0	A_44_P684180	NM_001037363	11666.2	339	6.705403e+003	6.705491e+002	5332	30	8.562937e+000	0	0	0	0	0	0	5714.05	1	1	47.8731	32.6923
DATA	1772	21	72	0	0	A_64_P104743	NM_133518	11691.9	338.935	1.917607e+002	1.948682e+001	225	37	8.268689e+000	0	0	0	0	0	0	162.543	1	1	54.4085	35.0606
DATA	1773	21	73	0	0	A_44_P941132	NM_001108128	11716.8	338.806	8.164292e+003	8.164366e+002	6597	35.5	8.278951e+000	0	0	0	0	0	0	6884.64	1	1	47.5395	34.35
DATA	1774	21	74	0	0	A_44_P187080	NM_001110823	11742.4	338.958	2.238999e+004	2.239002e+003	17976	35.5	9.540055e+000	0	0	0	0	0	0	18781.9	1	1	48.2044	34.4333
DATA	1775	21	75	0	0	A_42_P574960	ENSRNOT00000068719	11767.8	339	7.642876e+002	7.650981e+001	689.5	31	1.004375e+001	0	0	0	1	0	0	637.782	1	1	46.1809	33.3448
DATA	1776	21	76	0	0	A_64_P094850	A_64_P094850	11793.2	339.246	8.529401e+001	9.234479e+000	131.5	31	6.021383e+000	0	0	0	0	0	0	70.809	1	1	45.1352	30.4688
DATA	1777	21	77	0	0	A_43_P13418	NM_172042	11818.6	338.973	4.279303e+003	4.279450e+002	3478.5	24	7.761691e+000	0	0	0	0	0	0	3533.97	1	1	48.5334	26.3793
DATA	1778	21	78	66	-1	(-)3xSLv1	NegativeControl	11844.5	339	3.590467e+000	3.576492e+000	60	30	1.134638e+001	0	0	0	0	0	0	-0.98089	0	0	54.1152	31.5333
DATA	1779	21	79	0	0	A_44_P321594	ENSRNOT00000006966	11869.2	339.16	4.139881e+001	5.482454e+000	94.5	28	8.498685e+000	0	0	0	0	0	0	33.8404	1	1	48.2044	28.6667
DATA	1780	21	80	0	0	A_44_P792531	NM_001025700	11894.8	339.069	2.195706e+002	2.225230e+001	241	29.5	6.221230e+000	0	0	0	0	0	0	178.562	1	1	47.5395	30.5
DATA	1781	21	81	0	0	A_43_P14795	NM_001044248	11920.5	339.074	1.036996e+003	1.037632e+002	870	30	7.286901e+000	0	0	0	0	0	0	839.014	1	1	49.8279	29.9677
DATA	1782	21	82	0	0	A_42_P671502	NM_053467	11945.4	338.973	5.766567e+003	5.766682e+002	4471	30	8.418406e+000	0	0	0	0	0	0	4642.69	1	1	48.5334	29.5
DATA	1783	21	83	66	1	DarkCorner	DarkCorner	11971	338.952	3.681807e+000	3.667477e+000	56	30	8.989001e+000	0	0	0	0	0	0	-6.62499	0	0	51.0895	31.5294
DATA	1784	21	84	66	1	DarkCorner	DarkCorner	11996.5	339	3.699743e+000	3.685344e+000	57.5	33.5	1.013509e+001	0	0	0	0	0	0	-4.93336	0	0	54.1152	33.6471
DATA	1785	21	85	66	1	DarkCorner	DarkCorner	12022.6	339	3.717988e+000	3.703517e+000	55.5	31	8.005607e+000	0	0	0	0	0	0	-6.44776	0	0	49.1849	32.75
DATA	1786	22	1	66	1	DarkCorner	DarkCorner	9901.69	344.6	3.173609e+000	3.161257e+000	57	25	7.153708e+000	0	0	0	0	0	0	-1.47267	0	0	45.4864	26.125
DATA	1787	22	2	66	1	DarkCorner	DarkCorner	9927.13	345.267	3.156393e+000	3.144109e+000	53	27	5.290737e+000	0	0	0	0	0	0	-6.76495	0	0	49.1849	27.5385
DATA	1788	22	3	66	1	DarkCorner	DarkCorner	9952.29	345.012	3.140676e+000	3.128452e+000	53	26	4.006761e+000	0	0	0	0	0	0	-5.63269	0	0	49.8279	25.8519
DATA	1789	22	4	0	0	A_42_P704824	NM_001009640	9977.52	345.296	1.757020e+002	1.784389e+001	226	31	8.755125e+000	0	0	0	1	0	0	165.811	1	1	47.8731	30.1563
DATA	1790	22	5	0	0	A_42_P517554	NM_001107060	10003.4	345.427	1.294621e+002	1.331187e+001	182	30	5.883516e+000	0	0	0	0	0	0	122.752	1	1	57.5363	28.4828
DATA	1791	22	6	0	0	A_42_P586883	NM_001106416	10028.6	345.427	5.209430e+001	6.054506e+000	110.5	31	5.595328e+000	0	0	0	0	0	0	49.6083	1	1	57.5363	29.3333
DATA	1792	22	7	0	0	A_64_P060302	BF559343	10054	345.455	2.924708e+002	2.940802e+001	340	30	6.775760e+000	0	0	0	0	0	0	279.669	1	1	65	29.1714
DATA	1793	22	8	0	0	A_64_P055418	NM_001025641	10079.4	345.427	1.184469e+001	3.281771e+000	69.5	24.5	8.192985e+000	0	0	0	0	0	0	11.3705	1	0	57.5363	27.8125
DATA	1794	22	9	0	0	A_44_P317600	NM_012612	10104.6	345.235	7.138535e+002	7.145046e+001	746	28	6.213444e+000	0	0	0	0	0	0	687.758	1	1	51.7088	28.7917
DATA	1795	22	10	0	0	A_44_P433359	NM_022710	10130.4	345.427	3.778408e+002	3.790608e+001	428	27	5.892587e+000	0	0	0	0	0	0	365.31	1	1	57.5363	27.4516
DATA	1796	22	11	0	0	A_42_P788480	NM_019194	10155.6	345.392	7.694116e+003	7.694175e+002	7371	28	8.669132e+000	0	0	0	0	0	0	7462.55	1	1	49.1849	30
DATA	1797	22	12	0	0	A_44_P269808	NM_001025281	10181	345.455	8.576795e+001	9.093006e+000	144	28.5	8.157163e+000	0	0	0	0	0	0	83.4358	1	1	55.8519	28.0938
DATA	1798	22	13	0	0	A_64_P108165	NM_001108889	10206.4	345.427	1.608659e+001	3.414544e+000	74.5	31	8.366902e+000	0	0	0	0	0	0	15.6923	1	1	57.5363	33.6286
DATA	1799	22	14	0	0	A_42_P581567	NM_001011899	10231.7	345.5	1.484223e+002	1.514323e+001	204.5	28	7.324767e+000	0	0	0	0	0	0	145.15	1	1	57.5363	29.3438
DATA	1800	22	15	0	0	A_42_P746029	NM_144748	10257.3	345.5	1.522436e+001	3.361783e+000	75	28	6.287468e+000	0	0	0	1	0	0	14.9234	1	1	57.5363	27.625
DATA	1801	22	16	0	0	A_42_P481087	XM_232226	10282.3	345.778	7.552389e+002	7.558309e+001	785.5	30	9.704117e+000	0	0	0	0	0	0	741.848	1	1	47.5395	30.3548
DATA	1802	22	17	0	0	A_64_P031020	ENSRNOT00000032728	10308.2	345.268	2.997244e+000	2.985578e+000	58.5	33	9.325372e+000	0	0	0	0	0	0	-1.53843	0	0	47.5395	32.6471
DATA	1803	22	18	0	0	A_44_P344228	NM_183051	10333.5	345.5	2.758581e+001	4.061253e+000	88	27	7.298817e+000	0	0	0	0	0	0	27.1918	1	1	57.5363	28
DATA	1804	22	19	0	0	A_64_P009798	NM_021742	10358.6	345.526	2.988019e+000	2.976390e+000	55	28	8.097939e+000	0	0	0	0	0	0	-6.39901	0	0	49.8279	28.1875
DATA	1805	22	20	0	0	A_44_P775747	ENSRNOT00000051510	10384.1	345.5	2.126813e+004	2.126815e+003	21291	25	4.611508e+000	0	0	0	0	0	0	21019.7	1	1	44.4243	26.1379
DATA	1806	22	21	0	0	A_44_P349475	NM_031333	10409.5	345.824	8.133804e+002	8.139223e+001	847	31	6.698012e+000	0	0	0	0	0	0	804.716	1	1	48.8603	30.4324
DATA	1807	22	22	0	0	A_64_P114198	NM_001080153	10434.8	345.797	2.414258e+003	2.414440e+002	2426.5	27	7.740149e+000	0	0	0	0	0	0	2390.43	1	1	48.2044	28.0811
DATA	1808	22	23	0	0	A_42_P719060	NM_001108994	10460.4	345.836	2.920727e+003	2.920878e+002	2824	30.5	7.010432e+000	0	0	0	0	0	0	2893.63	1	1	48.5334	30.1154
DATA	1809	22	24	0	0	A_44_P163243	NM_175759	10485.6	345.573	2.976094e+000	2.964511e+000	56	29	7.323792e+000	0	0	0	0	0	0	-3.23857	0	0	65	30.931
DATA	1810	22	25	0	0	A_44_P156864	A_44_P156864	10511.1	345.5	1.182981e+002	1.219547e+001	180.5	30.5	8.976918e+000	0	0	0	0	0	0	117.262	1	1	56.9804	33.3667
DATA	1811	22	26	0	0	A_42_P758052	NM_001031645	10536.4	345.5	4.301102e+003	4.301204e+002	4167.5	31	4.908744e+000	0	0	0	0	0	0	4263.37	1	1	47.8731	30.0313
DATA	1812	22	27	0	0	A_44_P280659	NM_001100971	10561.9	345.5	5.669931e+001	6.398238e+000	118	29	7.370911e+000	0	0	0	0	0	0	56.1898	1	1	56.9804	28.9459
DATA	1813	22	28	0	0	A_42_P768380	NM_001100158	10587.1	345.603	5.533231e+003	5.533311e+002	5395.5	29	5.310367e+000	0	0	0	0	0	0	5481.35	1	1	48.5334	28.5
DATA	1814	22	29	0	0	A_44_P486312	NM_144737	10612.2	345.986	3.299871e+002	3.313187e+001	394	30.5	7.614118e+000	0	0	0	0	0	0	326.714	1	1	46.8651	30.6563
DATA	1815	22	30	0	0	A_64_P005288	XM_575125	10638.1	345.523	5.499613e+001	6.250334e+000	117	26	5.768758e+000	0	0	0	0	0	0	54.4042	1	1	55.8519	27.75
DATA	1816	22	31	0	0	A_64_P101885	ENSRNOT00000058341	10663.4	345.573	2.675178e+002	2.691646e+001	323	28.5	8.126945e+000	0	0	0	0	0	0	264.382	1	1	57.5363	28.7941
DATA	1817	22	32	0	0	A_64_P113645	ENSRNOT00000055538	10688.6	345.573	8.575828e+000	3.097377e+000	67	30	6.484395e+000	0	0	0	0	0	0	8.46561	1	0	57.5363	31.2188
DATA	1818	22	33	0	0	A_42_P588869	NM_001008348	10714	345.781	3.093485e+003	3.093628e+002	2994	28	4.958321e+000	0	0	0	0	0	0	3049.73	1	1	47.5395	27.4194
DATA	1819	22	34	0	0	A_64_P028027	NM_001000473	10739.6	345.573	3.262255e+001	4.421701e+000	92.5	31	5.248504e+000	0	0	0	0	0	0	32.1113	1	1	57.5363	30.7586
DATA	1820	22	35	0	0	A_42_P468805	NM_145721	10765	345.545	3.711598e+002	3.723621e+001	431.5	30	6.011299e+000	0	0	0	0	0	0	364.725	1	1	55.8519	30.4167
DATA	1821	22	36	0	0	A_42_P522194	NM_012914	10790.1	345.808	1.178142e+002	1.215621e+001	176	27	6.103856e+000	0	0	0	0	0	0	115.563	1	1	49.5074	28.0313
DATA	1822	22	37	0	0	A_64_P002969	A_64_P002969	10815.6	345.573	3.133193e+000	3.017751e+000	62	30	7.747811e+000	0	0	0	0	0	0	3.06701	1	0	57.5363	29.9714
DATA	1823	22	38	0	0	A_42_P453935	NM_001198580	10840.5	346.071	4.458784e+003	4.458886e+002	4325	28.5	7.491662e+000	0	0	0	0	0	0	4355.51	1	1	47.8731	27.9375
DATA	1824	22	39	0	0	A_42_P523551	NM_001014087	10866.5	346	3.026739e+000	3.022346e+000	61	29	6.354516e+000	0	0	0	0	0	0	2.05801	0	0	54.1152	28.8108
DATA	1825	22	40	0	0	A_64_P046076	NM_053952	10891.7	346.026	1.327782e+003	1.328126e+002	1341	29	9.278285e+000	0	0	0	0	0	0	1290.7	1	1	49.1849	28.0909
DATA	1826	22	41	0	0	A_42_P607770	NM_001134616	10916.8	345.897	7.673231e+003	7.673291e+002	7625.5	29	4.643716e+000	0	0	0	1	0	0	7439.23	1	1	46.5243	28.5556
DATA	1827	22	42	0	0	A_64_P089400	NM_022605	10942.2	346	3.238994e+002	3.253219e+001	369.5	29	6.210193e+000	0	0	0	0	0	0	313.147	1	1	46.1809	30.069
DATA	1828	22	43	0	0	A_64_P072064	FQ221714	10968.5	346	1.014521e+005	1.014521e+004	97286.5	33	1.034650e+001	0	0	0	0	0	0	97785.2	1	1	54.1152	34.75
DATA	1829	22	44	0	0	A_42_P555125	NM_012913	10993.3	345.9	6.143864e+003	6.143940e+002	5718.5	32.5	8.304621e+000	0	0	0	0	0	0	5903.85	1	1	47.2035	34.4688
DATA	1830	22	45	0	0	A_42_P768776	NM_001108443	11018.5	345.944	5.212722e+003	5.212812e+002	4956.5	34	7.925225e+000	0	0	0	0	0	0	4993.08	1	1	48.5334	34.4667
DATA	1831	22	46	0	0	A_42_P593930	NM_001195606	11044.5	346	3.089867e+000	3.078239e+000	62.5	32	9.230015e+000	0	0	0	0	0	0	0.472798	0	0	54.1152	31.5455
DATA	1832	22	47	0	0	A_64_P013545	NM_001115046	11069.5	346	2.250460e+002	2.271553e+001	272	34	7.491298e+000	0	0	0	0	0	0	214.086	1	1	48.5334	34.5333
DATA	1833	22	48	0	0	A_42_P548520	NM_001100834	11095.1	346.087	4.575331e+003	4.575436e+002	4322	34	7.828197e+000	0	0	0	0	0	0	4336.71	1	1	46.8651	33.1143
DATA	1834	22	49	0	0	A_42_P692317	NM_001107565	11120.2	345.884	8.223651e+002	8.229534e+001	830	32	8.522632e+000	0	0	0	0	0	0	776.57	1	1	46.5243	31.325
DATA	1835	22	50	0	0	A_64_P078303	NM_001106526	11145.8	345.958	3.381961e+001	4.603603e+000	93	29	8.954536e+000	0	0	0	0	0	0	31.8128	1	1	46.8651	31.0606
DATA	1836	22	51	0	0	A_64_P031771	A_64_P031771	11171.3	346.057	4.112872e+001	5.171935e+000	101	28	6.684939e+000	0	0	0	0	0	0	38.535	1	1	46.5243	27.5833
DATA	1837	22	52	0	0	A_44_P393929	NM_001039713	11196.3	345.882	8.422571e+001	8.991823e+000	138	26.5	8.140434e+000	0	0	0	0	0	0	78.5951	1	1	45.835	29.2
DATA	1838	22	53	0	0	A_44_P135730	XM_228802	11222.4	346.069	2.182120e+002	2.204911e+001	268.5	32	8.308167e+000	0	0	0	0	0	0	202.756	1	1	53.8203	30.8889
DATA	1839	22	54	0	0	A_43_P23215	NM_001025737	11246.9	346.313	1.361974e+002	1.398491e+001	188	29	7.170659e+000	0	0	0	0	0	0	126.033	1	1	45.835	28.9487
DATA	1840	22	55	0	0	A_64_P118427	A_64_P118427	11272.9	346.065	6.418234e+001	7.166994e+000	124.5	29	9.589236e+000	0	0	0	0	0	0	59.1246	1	1	65	29.8649
DATA	1841	22	56	0	0	A_64_P075560	NM_001037526	11297.7	345.956	1.490376e+001	3.533116e+000	76.5	31	8.162616e+000	0	0	0	0	0	0	13.6692	1	0	46.1809	31.0357
DATA	1842	22	57	0	0	A_64_P150311	NM_177935	11323.6	346.127	5.103110e+001	6.033127e+000	106	30	6.986666e+000	0	0	0	0	0	0	46.5884	1	1	47.5395	29.6563
DATA	1843	22	58	0	0	A_44_P272393	NM_001106892	11349.1	346.065	7.702047e+001	8.353165e+000	130	31.5	8.318746e+000	0	0	0	0	0	0	69.9884	1	1	54.4085	33.1923
DATA	1844	22	59	0	0	A_44_P421887	NM_001191565	11374	345.828	1.769706e+002	1.799271e+001	220	31	7.510202e+000	0	0	0	0	0	0	160.065	1	1	45.4864	31.7255
DATA	1845	22	60	0	0	A_64_P045102	A_64_P045102	11399.8	345.953	1.288189e+003	1.288602e+002	1225	29.5	6.700310e+000	0	0	0	0	0	0	1159.52	1	1	45.4864	29.5938
DATA	1846	22	61	0	0	A_42_P818546	NM_001191600	11425	345.828	5.368445e+002	5.378456e+001	532	27.5	6.772513e+000	0	0	0	0	0	0	480.889	1	1	45.4864	28.4375
DATA	1847	22	62	0	0	A_42_P777445	ENSRNOT00000012684	11450.6	346.27	7.080223e+001	7.809762e+000	127.5	28	6.215737e+000	0	0	0	0	0	0	63.1151	1	1	44.0646	28.6538
DATA	1848	22	63	0	0	A_64_P111709	NM_001000554	11476	346.455	2.163393e+002	2.188601e+001	255	28	5.956766e+000	0	0	0	0	0	0	191.902	1	1	55.8519	27.8235
DATA	1849	22	64	0	0	A_64_P107509	NM_001191874	11501.5	346.352	7.624247e+001	8.319319e+000	130	31	7.314741e+000	0	0	0	0	0	0	67.2894	1	1	57.5363	31.125
DATA	1850	22	65	0	0	A_64_P121836	ENSRNOT00000007828	11526	346.52	4.256484e+001	5.413650e+000	101	33	6.555492e+000	0	0	0	0	0	0	37.3847	1	1	48.5334	32.5676
DATA	1851	22	66	0	0	A_42_P684281	XR_008784	11552.4	346.427	3.066572e+003	3.066756e+002	2646.5	35	6.228096e+000	0	0	0	0	0	0	2679.1	1	1	57.5363	35.4074
DATA	1852	22	67	0	0	A_64_P060804	ENSRNOT00000000462	11577.6	346.427	5.547429e+001	6.496073e+000	114.5	30	7.538127e+000	0	0	0	0	0	0	48.2193	1	1	57.5363	32.1481
DATA	1853	22	68	0	0	A_64_P075675	A_64_P075675	11603	346.455	3.908520e+002	3.923259e+001	400	33	8.466829e+000	0	0	0	0	0	0	337.989	1	1	55.8519	34.4828
DATA	1854	22	69	0	0	A_44_P254973	NM_198051	11628	346.03	4.833438e+001	5.918290e+000	106	31	5.490440e+000	0	0	0	0	0	0	41.5805	1	1	46.8651	31.6667
DATA	1855	22	70	0	0	A_42_P492976	NM_001126099	11653.4	346.028	2.493186e+002	2.516711e+001	266	28	7.075618e+000	0	0	0	0	0	0	213.367	1	1	48.2044	28.7333
DATA	1856	22	71	0	0	A_42_P619114	NM_001014204	11679.4	346.427	2.856256e+001	4.479764e+000	88	30.5	8.693452e+000	0	0	0	0	0	0	24.3163	1	1	57.5363	32.7895
DATA	1857	22	72	0	0	A_42_P541625	NM_001126090	11703.9	346.268	2.370397e+004	2.370400e+003	19294	33	8.325527e+000	0	0	0	0	0	0	20078	1	1	47.5395	34.2424
DATA	1858	22	73	0	0	A_42_P469136	NM_001044288	11730	346.455	1.194749e+003	1.195258e+002	1038	34.5	8.617067e+000	0	0	0	1	0	0	1006.63	1	1	55.8519	33.95
DATA	1859	22	74	0	0	A_64_P101480	ENSRNOT00000034261	11755.5	346.5	6.696514e+001	7.558474e+000	119.5	34	9.096496e+000	0	0	0	0	0	0	56.1279	1	1	57.5363	33.2903
DATA	1860	22	75	0	0	A_64_P078554	ENSRNOT00000020079	11780.3	346.375	4.239224e+002	4.253840e+001	419.5	30.5	6.123348e+000	0	0	0	0	0	0	353.509	1	1	44.7812	29.8462
DATA	1861	22	76	0	0	A_44_P131067	ENSRNOT00000045483	11806.3	346.5	1.160105e+001	3.727008e+000	74	29	6.878672e+000	0	0	0	0	0	0	9.62329	1	0	65	27.871
DATA	1862	22	77	0	0	A_64_P055699	ENSRNOT00000010871	11831.4	346.5	1.105454e+003	1.106027e+002	947	24.5	7.523887e+000	0	0	0	0	0	0	912.354	1	1	48.5334	26.6875
DATA	1863	22	78	0	0	A_64_P117203	NM_001106002	11856.1	347.694	3.684963e+003	3.553362e+002	2938	27.5	8.512397e+000	0	1	0	0	0	0	3027.12	1	1	40.2912	28.525
DATA	1864	22	79	0	0	A_44_P357870	NM_031559	11881.8	346.5	3.003081e+002	3.024535e+001	306	29	8.810677e+000	0	0	0	0	0	0	245.358	1	1	48.5334	31.2813
DATA	1865	22	80	0	0	A_42_P732101	NM_022624	11907.4	346.5	6.313221e+003	6.313325e+002	4763	30	8.690491e+000	0	0	0	0	0	0	5131.9	1	1	48.5334	31.1034
DATA	1866	22	81	0	0	A_64_P155054	XM_001062835	11933.3	346.5	8.304721e+001	9.064526e+000	131	30.5	6.962427e+000	0	0	0	0	0	0	67.1647	1	1	57.5363	30.6538
DATA	1867	22	82	0	0	A_44_P534154	NM_001108852	11958.2	346.434	5.186656e+001	6.342481e+000	105	28.5	7.964022e+000	0	0	0	0	0	0	41.7446	1	1	49.5074	30.1
DATA	1868	22	83	66	1	DarkCorner	DarkCorner	11983.8	346.493	3.682641e+000	3.668308e+000	55	36	9.764103e+000	0	0	0	0	0	0	-7.15613	0	0	47.2035	33.7813
DATA	1869	22	84	66	1	DarkCorner	DarkCorner	12009.3	346.011	3.700918e+000	3.686514e+000	58	34	8.807568e+000	0	0	0	0	0	0	-5.41975	0	0	52.3208	34.6842
DATA	1870	22	85	66	1	DarkCorner	DarkCorner	12034.8	346.558	3.717851e+000	3.703381e+000	58	31	8.491000e+000	0	0	0	0	0	0	-4.28683	0	0	50.1463	31.153
DATA	1871	23	1	66	1	DarkCorner	DarkCorner	9888.69	352.329	3.178388e+000	3.166018e+000	56	24	5.838285e+000	0	0	0	0	0	0	-1.49389	0	0	48.2044	24.422
DATA	1872	23	2	66	1	DarkCorner	DarkCorner	9914.29	352.286	3.161132e+000	3.148828e+000	55	26	5.891976e+000	0	0	0	0	0	0	-4.22746	0	0	49.5074	25.95
DATA	1873	23	3	66	1	DarkCorner	DarkCorner	9939.78	352.684	3.144574e+000	3.132335e+000	54	26	3.763318e+000	0	0	0	0	0	0	-4.63112	0	0	49.5074	26.6552
DATA	1874	23	4	0	0	A_44_P246268	NM_001106862	9965.33	352.5	1.913866e+001	3.657611e+000	75.5	27	5.329304e+000	0	0	0	0	0	0	18.0402	1	1	57.5363	26.5172
DATA	1875	23	5	0	0	A_64_P028396	ENSRNOT00000051835	9990.5	352.5	3.480639e+001	4.662631e+000	95	32	7.769170e+000	0	0	0	0	0	0	32.9617	1	1	57.5363	30.12
DATA	1876	23	6	0	0	A_64_P020451	XM_219275	10015.9	352.5	2.674762e+001	4.085852e+000	84	30	7.549834e+000	0	0	0	0	0	0	25.4432	1	1	56.9804	30
DATA	1878	23	8	0	0	A_64_P106264	ENSRNOT00000029671	10066.7	352.9	1.738353e+003	1.738623e+002	1753	30	6.417878e+000	0	0	0	0	0	0	1667.32	1	1	47.2035	28.1786
DATA	1879	23	9	0	0	A_44_P524805	NM_214832	10092.5	352.621	2.787436e+001	4.133067e+000	88	23.5	5.833673e+000	0	0	0	0	0	0	26.8368	1	1	45.4864	26.4286
DATA	1880	23	10	0	0	A_42_P764228	NM_031707	10117.5	352.614	3.666149e+003	3.666275e+002	3550	26.5	6.917121e+000	0	0	0	0	0	0	3541.92	1	1	47.5395	27.0714
DATA	1881	23	11	0	0	A_44_P533760	NM_182843	10142.9	352.5	1.125098e+003	1.125506e+002	1101.5	29.5	9.017680e+000	0	0	0	0	0	0	1090.56	1	1	56.9804	29.6875
DATA	1882	23	12	0	0	A_42_P524610	NM_001108992	10168.3	352.611	2.251408e+003	2.251611e+002	2188	25	6.441844e+000	0	0	0	0	0	0	2189.05	1	1	48.2044	25.3571
DATA	1883	23	13	0	0	A_42_P570756	NM_134345	10193.6	352.573	1.172100e+005	1.172100e+004	114250	31	7.266361e+000	0	0	0	0	0	0	114286	1	1	57.5363	32
DATA	1884	23	14	0	0	A_44_P362969	NM_053688	10219.1	352.838	4.472198e+001	5.388098e+000	103	32	8.271679e+000	0	0	0	0	0	0	43.7229	1	1	47.8731	32.9412
DATA	1885	23	15	0	0	A_44_P308197	NM_001012190	10244.1	353.206	2.802256e+003	2.802417e+002	2728	28	8.164211e+000	0	0	0	0	0	0	2746.26	1	1	46.5243	29.6842
DATA	1886	23	16	0	1	ETG05_36762	ETG05_36762	10269.7	353.056	3.911227e+001	4.924040e+000	97.5	28	6.344956e+000	0	0	0	0	0	0	38.4146	1	1	47.2035	28.4615
DATA	1887	23	17	0	0	A_42_P744033	NM_001100846	10294.9	352.536	2.496009e+002	2.513804e+001	303	33	1.026555e+001	0	0	0	0	0	0	245.61	1	1	47.5395	33.1714
DATA	1888	23	18	0	0	A_42_P726363	NM_031536	10320.6	352.573	1.787791e+001	3.475572e+000	77	31.5	9.611157e+000	0	0	0	0	0	0	17.6232	1	1	57.5363	31.3214
DATA	1889	23	19	0	0	A_64_P010393	NM_053363	10345.6	352.873	4.347183e+003	4.347285e+002	4257	25	6.717257e+000	0	0	0	0	0	0	4291.87	1	1	47.5395	24.8077
DATA	1890	23	20	0	0	A_42_P612220	NM_001191711	10371.2	352.884	9.197507e+002	9.202308e+001	949.5	25	5.962839e+000	0	0	0	0	0	0	909.254	1	1	46.5243	25.8438
DATA	1891	23	21	0	0	A_44_P393551	NM_012567	10396.6	352.573	3.138498e+004	3.138499e+003	31449	30	6.319011e+000	0	0	0	0	0	0	31059.9	1	1	57.5363	29.6786
DATA	1892	23	22	0	0	A_44_P278688	NM_053682	10422.2	353.323	1.601112e+003	1.601386e+002	1588	27	8.296943e+000	0	0	0	0	0	0	1586.09	1	1	45.4864	28.8421
DATA	1893	23	23	0	0	A_44_P186989	NM_001000076	10447.6	352.573	6.185131e+000	3.027916e+000	67	27.5	6.679644e+000	0	0	0	0	0	0	6.13081	1	0	57.5363	28.5588
DATA	1894	23	24	0	0	A_42_P640277	NM_001003401	10473	352.545	3.663700e+004	3.663701e+003	35700	29	7.027419e+000	0	0	0	0	0	0	36332.7	1	1	55.8519	29.7692
DATA	1895	23	25	0	0	A_44_P398792	NM_053867	10498	352.921	1.204127e+004	1.204130e+003	12162	31.5	7.778175e+000	0	0	0	0	0	0	11945.1	1	1	45.4864	33.125
DATA	1896	23	26	0	0	A_64_P052552	ENSRNOT00000056797	10523.6	352.931	1.078399e+002	1.118323e+001	169	32.5	8.436988e+000	0	0	0	0	0	0	106.987	1	1	53.8203	33.3
DATA	1897	23	27	0	0	A_64_P119254	NM_001013202	10548.8	352.906	2.973365e+000	2.961792e+000	61	29	6.587414e+000	0	0	0	0	0	0	-0.617909	0	0	45.835	27.8947
DATA	1898	23	28	0	0	A_64_P159614	NM_053614	10574.2	353	4.061640e+003	4.061748e+002	4026	29	7.008290e+000	0	0	0	0	0	0	4027.87	1	1	46.1809	28.871
DATA	1899	23	29	0	0	A_42_P814107	NM_001024750	10600	353	1.239521e+002	1.274471e+001	184	29	6.677454e+000	0	0	0	0	0	0	122.859	1	1	54.9904	29.2051
DATA	1900	23	30	0	0	A_64_P150751	NM_212494	10625.5	353	6.170820e+002	6.177945e+001	647	30.5	7.071567e+000	0	0	0	0	0	0	611.215	1	1	54.1152	30.1563
DATA	1902	23	32	0	0	A_44_P838888	ENSRNOT00000038829	10675.8	353.191	4.871362e+001	5.706329e+000	111	29.5	7.365733e+000	0	0	0	0	0	0	48.159	1	1	46.1809	30.7667
DATA	1903	23	33	0	0	A_43_P12927	NM_053769	10701.6	352.93	4.450342e+002	4.460280e+001	498	30	5.337831e+000	0	0	0	0	0	0	439.4	1	1	47.5395	29.4857
DATA	1904	23	34	0	0	A_64_P140806	A_64_P140806	10726.9	353.012	2.831130e+004	2.831132e+003	27562.5	29	4.216455e+000	0	0	0	0	0	0	27913.7	1	1	51.0895	28.3871
DATA	1905	23	35	0	0	A_42_P607026	NM_001106839	10752.4	353.027	6.793402e+003	6.793467e+002	6731	29.5	6.156891e+000	0	0	0	0	0	0	6687.29	1	1	48.5334	30.8235
DATA	1906	23	36	0	0	A_44_P272186	NM_001107950	10777.6	353.063	2.418840e+001	3.845782e+000	85	28	5.521778e+000	0	0	0	0	0	0	23.7692	1	1	44.0646	28.5185
DATA	1907	23	37	0	0	A_44_P226658	NM_017046	10802.9	353.095	5.269012e+001	6.061034e+000	115	30	6.657720e+000	0	0	0	0	0	0	51.6776	1	1	47.5395	28.7949
DATA	1908	23	38	0	0	A_64_P119279	NM_001108109	10828	353.203	1.501420e+004	1.501423e+003	14572	31	6.752538e+000	0	0	0	0	0	0	14695.4	1	1	46.8651	30.375
DATA	1909	23	39	0	0	A_44_P1042876	NM_212504	10853.7	353.219	3.861207e+003	3.861324e+002	3591.5	29	7.138839e+000	0	0	0	0	0	0	3770.61	1	1	48.2044	28.5143
DATA	1910	23	40	0	0	A_64_P119607	ENSRNOT00000037601	10878.9	353.145	1.779018e+002	1.804400e+001	232	29.5	6.949839e+000	0	0	0	0	0	0	173.311	1	1	46.8651	28.8214
DATA	1911	23	41	0	0	A_42_P784252	NM_133557	10904.2	353	1.038684e+004	1.038688e+003	9694	29	8.921468e+000	0	0	0	1	0	0	10092.8	1	1	46.8651	30.1481
DATA	1912	23	42	0	0	A_44_P1033194	NM_139328	10929.9	353.037	3.052439e+003	3.052589e+002	3031	29	7.697211e+000	0	0	0	0	0	0	2957.91	1	1	49.8279	30.6
DATA	1913	23	43	0	0	A_42_P800048	NM_207610	10955.5	352.988	5.947109e+003	5.947186e+002	5732	33.5	9.067270e+000	0	0	0	0	0	0	5746.26	1	1	49.8279	35.3
DATA	1914	23	44	0	0	A_43_P11525	NM_012710	10980.9	353.065	5.578532e+001	6.357804e+000	116.5	33	8.979307e+000	0	0	0	0	0	0	53.74	1	1	65	35.8065
DATA	1915	23	45	0	0	A_64_P019037	NM_001013886	11006.5	353	4.750609e+004	4.750610e+003	44612	33.5	1.024269e+001	0	0	0	0	0	0	45618.9	1	1	54.1152	35.7647
DATA	1916	23	46	0	0	A_64_P003378	NM_001024336	11031.6	352.968	3.407554e+002	3.421351e+001	384	35	1.013638e+001	0	0	0	0	0	0	326.159	1	1	44.0646	33.3939
DATA	1917	23	47	0	0	A_44_P258855	NM_053431	11056.9	353.373	6.312690e+003	6.312765e+002	5932	34	9.685561e+000	0	0	0	0	0	0	6022.14	1	1	49.1849	33.6857
DATA	1918	23	48	0	1	ETG09_35454	ETG09_35454	11082.5	353.352	3.102901e+000	3.104474e+000	64	33	8.156933e+000	0	0	0	0	0	0	2.76421	0	0	57.5363	33.2895
DATA	1919	23	49	0	0	A_64_P089677	NM_001105977	11107.6	353.427	1.187785e+002	1.227622e+001	175	33	7.134355e+000	0	0	0	0	0	0	112.501	1	1	65	32.5517
DATA	1920	23	50	0	0	A_64_P013609	A_64_P013609	11132.9	352.942	3.126092e+000	3.114258e+000	62	36	1.074211e+001	0	0	0	0	0	0	0.429805	0	0	40.2912	36.5833
DATA	1921	23	51	0	0	A_44_P357470	NM_030849	11158.6	353.329	7.388540e+002	7.395150e+001	715	29	7.545034e+000	0	0	0	0	0	0	694.424	1	1	49.5074	29.3333
DATA	1922	23	52	0	0	A_44_P404064	ENSRNOT00000015387	11183.5	353.212	1.244283e+003	1.244679e+002	1220	28.5	7.838602e+000	0	0	0	0	0	0	1164.85	1	1	46.5243	29.7333
DATA	1923	23	53	0	0	A_64_P092167	A_64_P092167	11209.4	353.427	3.348521e+001	4.598300e+000	94	30	8.616404e+000	0	0	0	0	0	0	31.2174	1	1	57.5363	30
DATA	1924	23	54	0	0	A_42_P463036	ENSRNOT00000038596	11234.6	353.36	3.751467e+003	3.751600e+002	3459	32	8.040078e+000	0	0	0	0	0	0	3482.77	1	1	48.8603	31.5
DATA	1925	23	55	0	0	A_44_P1003794	NM_012576	11260.3	353.662	1.267395e+003	1.267793e+002	1208	29.5	1.034324e+001	0	0	0	0	0	0	1171.56	1	1	48.5334	30.4286
DATA	1926	23	56	0	0	A_64_P099006	BC105831	11285.7	353.464	3.204976e+000	3.199125e+000	66	31	8.306624e+000	0	0	0	0	0	0	1.8934	0	0	46.8651	31
DATA	1927	23	57	0	0	A_42_P795467	NM_001108055	11310.7	353.264	4.003167e+002	4.015990e+001	434	31	7.448234e+000	0	0	0	0	0	0	366.773	1	1	52.0157	30.9286
DATA	1928	23	58	0	0	A_42_P629321	NM_031590	11336.4	353.427	4.132302e+001	5.239655e+000	103.5	31	7.542239e+000	0	0	0	0	0	0	37.687	1	1	65	30.6087
DATA	1929	23	59	0	0	A_42_P549786	NM_022609	11361.2	353.338	4.620223e+003	4.620336e+002	4021	33.5	6.999543e+000	0	0	0	0	0	0	4194.57	1	1	46.5243	34.0789
DATA	1930	23	60	0	0	A_64_P006354	ENSRNOT00000043959	11387.3	353.5	7.842988e+001	8.490404e+000	133	32	6.925520e+000	0	0	0	0	0	0	70.8613	1	1	57.5363	32.4762
DATA	1931	23	61	0	0	A_64_P057109	A_64_P057109	11412.4	353.627	1.399556e+003	1.399937e+002	1322	29	8.196178e+000	0	0	0	0	0	0	1258.57	1	1	48.8603	28.9655
DATA	1932	23	62	0	0	A_44_P101361	NM_032070	11437.9	353.5	2.896271e+001	4.378091e+000	89	28	7.534598e+000	0	0	0	0	0	0	25.918	1	1	56.9804	28.4375
DATA	1933	23	63	0	0	A_64_P103354	ENSRNOT00000066893	11463	353.587	8.116745e+002	8.123447e+001	758	28	6.905591e+000	0	0	0	0	0	0	722.85	1	1	44.0646	29.4828
DATA	1934	23	64	0	0	A_42_P746868	NM_001127580	11488.6	353.577	2.762242e+004	2.762244e+003	23789	31	7.603055e+000	0	0	0	0	0	0	24476.8	1	1	47.8731	30.8387
DATA	1935	23	65	0	0	A_42_P707838	NM_012979	11513.6	353.36	1.990292e+003	1.990571e+002	1702	32	7.546474e+000	0	0	0	0	0	0	1754.88	1	1	48.8603	32.0833
DATA	1936	23	66	0	0	A_42_P628098	NM_001107991	11539.2	353.407	1.354218e+003	1.354632e+002	1240	32	7.092611e+000	0	0	0	0	0	0	1188.01	1	1	52.3208	31.45
DATA	1937	23	67	0	0	A_64_P028071	ENSRNOT00000042928	11564.9	353.5	2.385970e+005	2.385970e+004	208531	35	1.023768e+001	0	0	0	0	0	0	208243	1	1	56.9804	33.32
DATA	1938	23	68	0	0	A_64_P002944	A_64_P002944	11590.3	353.448	9.136360e+003	9.136423e+002	8046	31	9.889048e+000	0	0	0	0	0	0	7933.23	1	1	52.0157	33.0286
DATA	1939	23	69	0	0	A_64_P072159	XM_574060	11615.5	353.485	3.427385e+001	4.828359e+000	90	31	9.287950e+000	0	0	0	0	0	0	29.6092	1	1	46.5243	32.1379
DATA	1940	23	70	0	0	A_64_P052365	NM_001109318	11640.9	353.582	3.332899e+002	3.350383e+001	352	30.5	1.024998e+001	0	0	0	0	0	0	286.459	1	1	46.1809	33.1071
DATA	1941	23	71	0	0	A_64_P023150	ENSRNOT00000042777	11666.1	354.323	2.130260e+002	2.157782e+001	250	28	1.015162e+001	0	0	0	0	0	0	182.189	1	1	44.7812	32.6571
DATA	1942	23	72	0	0	A_44_P374902	NM_133429	11691.9	353.5	5.431799e+002	5.442770e+001	522.5	32	8.247617e+000	0	0	0	0	0	0	462.022	1	1	56.9804	34.0938
DATA	1943	23	73	0	0	A_44_P163271	NM_198733	11717.4	353.573	8.712642e+000	3.579742e+000	70	35	8.904712e+000	0	0	0	0	0	0	7.37251	1	0	57.5363	33.3902
DATA	1944	23	74	0	0	A_42_P548520	NM_001100834	11742.6	353.464	4.716059e+003	4.716189e+002	3893	36	8.324988e+000	0	0	0	0	0	0	3970.16	1	1	46.8651	34.3448
DATA	1945	23	75	0	0	A_64_P012154	XM_225935	11768.1	353.5	3.153292e+001	4.717044e+000	88	34	9.469628e+000	0	0	0	0	0	0	26.4083	1	1	56.9804	33.9231
DATA	1946	23	76	0	0	A_64_P033574	NM_001000606	11793.4	353.573	3.539927e+000	3.533354e+000	64	30	5.774877e+000	0	0	0	0	0	0	1.87905	0	0	57.5363	29.7222
DATA	1947	23	77	0	0	A_64_P027764	NM_022685	11818.3	353.924	1.843363e+002	1.877114e+001	218	24	7.044021e+000	0	0	0	0	0	0	152.835	1	1	45.835	25.8148
DATA	1948	23	78	0	0	A_42_P484738	NM_022266	11844.4	353.573	6.968744e+002	6.977845e+001	619.5	25	6.743108e+000	0	1	0	1	0	0	574.717	1	1	57.5363	25.9268
DATA	1949	23	79	0	0	A_64_P036355	NM_053311	11869.9	354.111	1.717673e+004	1.717677e+003	14777.5	28	8.476812e+000	0	0	0	0	0	0	14096	1	1	45.4864	28.4722
DATA	1950	23	80	0	0	A_42_P694928	NM_001109046	11895	353.545	2.346717e+002	2.374146e+001	247	30	8.382265e+000	0	0	0	0	0	0	191.601	1	1	55.8519	31.0645
DATA	1951	23	81	0	0	A_42_P588738	NM_133542	11920.5	353.648	6.409201e+001	7.359092e+000	115	30.5	6.831423e+000	0	0	0	0	0	0	52.0696	1	1	57.5363	30.9063
DATA	1952	23	82	0	0	A_64_P141254	XM_001060542	11945.6	353.573	3.938823e+001	5.359189e+000	97.5	29	7.785739e+000	0	0	0	0	0	0	31.8441	1	1	57.5363	30.8929
DATA	1953	23	83	0	0	A_42_P546054	NM_001013873	11971.4	353.573	2.744676e+002	2.768866e+001	283	30	8.412507e+000	0	0	0	1	0	0	220.804	1	1	57.5363	30.2973
DATA	1954	23	84	66	1	DarkCorner	DarkCorner	11996.4	353.792	3.683391e+000	3.669055e+000	56	36	9.347561e+000	0	0	0	0	0	0	-6.42617	0	0	49.5074	34.5758
DATA	1955	23	85	66	1	DarkCorner	DarkCorner	12022.1	353.614	3.701224e+000	3.686819e+000	61	31	7.175945e+000	0	0	0	0	0	0	-1.81771	0	0	57.259	32.25
DATA	1956	24	1	66	1	DarkCorner	DarkCorner	9901.15	359.848	3.165895e+000	3.153573e+000	56	23.5	6.818170e+000	0	0	0	0	0	0	-3.7028	0	0	49.1849	24.1522
DATA	1957	24	2	66	1	DarkCorner	DarkCorner	9926.85	359.973	3.149035e+000	3.136779e+000	52	27	4.459529e+000	0	0	0	0	0	0	-7.60209	0	0	47.2035	26.6286
DATA	1958	24	3	0	0	A_64_P000371	NM_017308	9952.21	359.806	1.658250e+003	1.658544e+002	1619.5	27	4.446705e+000	0	0	0	0	0	0	1560.95	1	1	47.5395	27.0313
DATA	1959	24	4	0	0	A_42_P772356	NM_001191597	9977.84	359.897	5.874799e+003	5.874881e+002	5607	28.5	7.803987e+000	0	0	0	0	0	0	5556.92	1	1	46.5243	29.5313
DATA	1961	24	6	0	0	A_42_P470757	NM_001004075	10028.3	360.303	4.337968e+003	4.338077e+002	4023.5	27	5.806703e+000	0	0	0	0	0	0	4139.8	1	1	48.5334	27.303
DATA	1962	24	7	0	0	A_64_P034250	ENSRNOT00000041464	10054.3	360.125	4.622966e+001	5.547237e+000	105.5	28	6.923714e+000	0	0	0	0	0	0	44.301	1	1	47.8731	27.6571
DATA	1963	24	8	0	0	A_64_P065063	NM_012954	10079.5	360	9.718268e+001	1.018692e+001	158	29	5.447304e+000	0	0	0	0	0	0	93.4839	1	1	54.1152	27.1613
DATA	1964	24	9	0	0	A_64_P088866	ENSRNOT00000049194	10104.7	359.754	4.613031e+002	4.623060e+001	500	24	8.027453e+000	0	0	0	0	0	0	445.329	1	1	45.1352	27.24
DATA	1965	24	10	0	0	A_44_P111759	NM_001000956	10130	359.931	3.044932e+000	3.034350e+000	61	26.5	6.348657e+000	0	0	0	0	0	0	0.849876	0	0	46.8651	27.2188
DATA	1966	24	11	0	0	A_64_P045019	ENSRNOT00000032417	10155.4	359.87	2.242466e+003	2.242670e+002	2262	25	6.164332e+000	0	0	0	0	0	0	2179.07	1	1	46.8651	24.5313
DATA	1967	24	12	0	0	A_64_P138989	XM_001053562	10181	360	8.691773e+001	9.199679e+000	144	27	7.701010e+000	0	0	0	0	0	0	84.7133	1	1	54.9904	27.25
DATA	1968	24	13	0	0	A_42_P537715	NM_001025743	10206.1	360.192	2.293486e+003	2.293683e+002	2218	32	8.897143e+000	0	0	0	0	0	0	2241.4	1	1	47.5395	34.7027
DATA	1969	24	14	0	0	A_42_P453171	NM_001107063	10231.4	360.157	2.087808e+003	2.088023e+002	2092	27.5	8.880876e+000	0	0	0	0	0	0	2045.46	1	1	47.5395	31.0313
DATA	1971	24	16	0	0	A_64_P096157	ENSRNOT00000059486	10282.1	360.412	2.027677e+002	2.049543e+001	255	30	7.970543e+000	0	0	0	0	0	0	199.523	1	1	46.1809	29.3793
DATA	1972	24	17	0	0	A_43_P10076	NM_031665	10307.7	360.219	1.300523e+004	1.300526e+003	12288	33	8.716114e+000	0	0	0	0	0	0	12820.6	1	1	48.2044	31.9722
DATA	1974	24	19	0	0	A_42_P772878	NM_001011936	10358.4	360.247	3.619358e+003	3.619480e+002	3496	25	7.196176e+000	0	0	0	0	0	0	3578.84	1	1	48.5334	25.4194
DATA	1976	24	21	0	0	A_44_P447394	NM_019193	10409.1	360.507	7.890923e+003	7.890978e+002	7605	30	6.789936e+000	0	0	0	0	0	0	7819.95	1	1	48.5334	29.3548
DATA	1977	24	22	0	0	A_42_P504250	NM_001134987	10434.6	360.479	1.031819e+003	1.032244e+002	1067	27	6.482615e+000	0	0	0	0	0	0	1023.34	1	1	48.2044	28.2308
DATA	1978	24	23	0	0	A_42_P675802	NM_145777	10460.2	360.442	2.091899e+003	2.092108e+002	2092	30	6.549636e+000	0	0	0	0	0	0	2075.93	1	1	49.8279	29.9091
DATA	1979	24	24	0	0	A_64_P111843	XM_001074913	10485.1	360.23	1.201771e+003	1.202135e+002	1241	32.5	7.171648e+000	0	0	0	0	0	0	1193.01	1	1	48.2044	33.1071
DATA	1980	24	25	0	0	A_44_P118724	NM_019361	10510.6	359.814	1.863558e+004	1.863560e+003	17778	31.5	8.056196e+000	0	0	0	0	0	0	18502.3	1	1	47.2035	31.8333
DATA	1981	24	26	0	0	A_43_P21749	NM_001108329	10536.5	360.352	3.723155e+001	4.755837e+000	98	30	8.123906e+000	0	0	0	0	0	0	36.9669	1	1	57.5363	30.2581
DATA	1982	24	27	0	0	A_43_P11879	NM_017250	10561.9	360.5	4.973974e+001	5.787916e+000	110	26.5	7.286593e+000	0	0	0	0	0	0	49.3765	1	1	56.9804	26.1389
DATA	1983	24	28	0	0	A_64_P023182	NM_001000033	10587.1	360.302	5.441924e+000	3.010501e+000	67	29	6.405469e+000	0	0	0	0	0	0	5.39989	1	0	45.1352	30.5676
DATA	1985	24	30	0	0	A_44_P368461	NM_001107085	10638.1	360.5	7.971657e+000	3.070227e+000	69	27	7.491662e+000	0	0	0	0	0	0	7.89935	1	0	56.9804	28
DATA	1986	24	31	0	0	A_64_P097257	A_64_P097257	10663.5	360.5	7.978823e+001	8.512897e+000	141	29	8.424235e+000	0	0	0	0	0	0	78.9883	1	1	57.5363	30.5
DATA	1987	24	32	0	0	A_64_P100634	NM_001100171	10688.4	360.908	3.672648e+002	3.684645e+001	420.5	30	7.644938e+000	0	0	0	0	0	0	363.192	1	1	49.1849	29.4848
DATA	1988	24	33	0	0	A_64_P041902	NM_001025653	10714	360.5	3.428658e+003	3.428787e+002	3396	31	4.386448e+000	0	0	0	0	0	0	3385.97	1	1	48.5334	30.2813
DATA	1990	24	35	0	0	A_64_P116171	NM_001004266	10765.1	360.5	1.467559e+002	1.497600e+001	206	28	5.459204e+000	0	0	0	0	0	0	144.468	1	1	56.9804	29.1071
DATA	1991	24	36	0	0	A_44_P243279	NM_001134780	10790.5	360.5	3.615433e+002	3.627776e+001	422	27.5	6.852469e+000	0	0	0	0	0	0	355.253	1	1	57.5363	27.7941
DATA	1992	24	37	0	0	A_64_P151468	XM_001062494	10815.7	360.5	1.289266e+001	3.261632e+000	77	30	6.711930e+000	0	0	0	0	0	0	12.6432	1	0	57.5363	28.75
DATA	1993	24	38	0	0	A_64_P075769	ENSRNOT00000043984	10841.1	360.621	4.255221e+003	4.255327e+002	4305	29.5	7.124373e+000	0	0	0	0	0	0	4163.94	1	1	45.4864	30.0294
DATA	1994	24	39	0	0	A_42_P508921	NM_031703	10866.8	360.38	3.021374e+000	3.022772e+000	64	29	6.568578e+000	0	0	0	0	0	0	2.75028	0	0	47.5395	28.8286
DATA	1995	24	40	0	0	A_44_P503376	NM_001000274	10892	360.545	3.028750e+000	3.030637e+000	63	32	9.587828e+000	0	0	0	0	0	0	2.80053	0	0	65	31.7333
DATA	1996	24	41	0	0	A_64_P093088	NM_001000816	10917.5	360.5	1.948517e+001	3.598203e+000	80.5	29	6.950284e+000	0	0	0	0	0	0	18.9253	1	1	57.5363	30.125
DATA	1997	24	42	0	0	A_44_P489608	NM_023967	10942.7	360.5	1.311994e+002	1.346602e+001	192	31	9.450624e+000	0	0	0	0	0	0	127.08	1	1	57.5363	33.7429
DATA	1998	24	43	0	0	A_44_P213088	ENSRNOT00000037507	10968.1	360.333	2.711069e+001	4.074927e+000	87.5	32.5	9.189495e+000	0	0	0	0	0	0	26.1822	1	1	48.2044	34.8056
DATA	1999	24	44	0	0	A_64_P060725	NM_001025278	10993.5	360.5	9.113379e+000	3.184674e+000	70	32	8.023076e+000	0	0	0	0	0	0	8.77454	1	0	57.5363	33.4286
DATA	2000	24	45	0	0	A_44_P384698	XM_216321	11018.8	360.632	3.259515e+003	3.259659e+002	3284	35	9.657781e+000	0	0	0	0	0	0	3128.4	1	1	49.5074	33.9091
DATA	2001	24	46	0	0	A_42_P696084	NM_031022	11044	360.729	2.211813e+003	2.212026e+002	2118	29.5	8.665607e+000	0	0	0	0	0	0	2115.88	1	1	46.8651	31.0625
DATA	2002	24	47	0	0	A_64_P014918	NM_001108246	11069.6	361	9.120147e+002	9.125353e+001	890	34	1.023012e+001	0	0	0	0	0	0	869.464	1	1	49.1849	35.303
DATA	2003	24	48	0	0	A_64_P032690	ENSRNOT00000049975	11095.4	360.573	7.202033e+004	7.202033e+003	68176	33.5	7.444147e+000	0	0	0	0	0	0	68406	1	1	57.5363	32.0625
DATA	2004	24	49	0	0	A_42_P481516	NM_134364	11119.9	360.534	4.150766e+003	4.150882e+002	3904	38	8.212041e+000	0	0	0	0	0	0	3928.38	1	1	48.5334	36.3235
DATA	2005	24	50	0	0	A_64_P166158	ENSRNOT00000013694	11146	360.545	1.564301e+002	1.595044e+001	210.5	34	8.807245e+000	0	0	0	0	0	0	147.471	1	1	65	35
DATA	2006	24	51	0	0	A_64_P140338	A_64_P140338	11171.4	360.573	3.141024e+000	3.132267e+000	63	27	7.997507e+000	0	0	0	0	0	0	1.3838	0	0	57.5363	28.963
DATA	2007	24	52	0	1	ERCC-00062_278	ERCC-00062_278	11196.8	360.836	2.587126e+002	2.606128e+001	314	29	7.574938e+000	0	0	0	0	0	0	241.97	1	1	45.1352	30.1176
DATA	2008	24	53	0	0	A_64_P110838	NM_001013175	11222.4	360.573	2.010148e+002	2.034750e+001	249.5	31	8.355406e+000	0	0	0	0	0	0	187.216	1	1	57.5363	30.2069
DATA	2009	24	54	0	0	A_42_P802358	NM_001024341	11247	360.84	1.513967e+004	1.513970e+003	13204	30	7.316441e+000	0	0	0	0	0	0	14043.3	1	1	47.8731	29.0303
DATA	2010	24	55	0	0	A_64_P010421	A_64_P010421	11272.3	360.971	4.261970e+001	5.318213e+000	100	31	6.884644e+000	0	0	0	0	0	0	39.364	1	1	45.835	30.3143
DATA	2011	24	56	0	0	A_43_P13320	NM_138880	11298.4	360.573	1.035074e+001	3.359163e+000	73	32	8.409396e+000	0	0	0	0	0	0	9.51614	1	0	57.5363	32.4444
DATA	2012	24	57	0	0	A_42_P800916	NM_022403	11323.7	360.908	5.479116e+001	6.350112e+000	113	31	4.944716e+000	0	0	0	0	0	0	50.1512	1	1	45.1352	30.5455
DATA	2013	24	58	0	0	A_42_P554610	XM_001064863	11348.6	360.853	1.152445e+004	1.152450e+003	10146	31	6.748837e+000	0	0	0	0	0	0	10501.1	1	1	48.8603	31.7586
DATA	2014	24	59	0	0	A_42_P476353	NM_001012113	11374	360.889	9.925729e+003	9.925782e+002	8476	32	7.275135e+000	0	0	0	0	0	0	9002.37	1	1	46.8651	32.8409
DATA	2015	24	60	0	0	A_43_P12234	NM_022516	11399.6	360.843	2.619705e+003	2.619907e+002	2273	31	7.794677e+000	0	0	0	0	0	0	2364.71	1	1	47.5395	32.0968
DATA	2016	24	61	0	0	A_64_P048315	ENSRNOT00000044039	11425.3	360.986	2.722901e+002	2.742473e+001	307.5	29	9.318037e+000	0	0	0	0	0	0	244.603	1	1	47.2035	29.3226
DATA	2017	24	62	0	0	A_44_P477047	NM_171983	11450.5	361	7.617399e+004	7.617400e+003	66218	32.5	9.323337e+000	0	0	0	0	0	0	68100.4	1	1	54.1152	34.2692
DATA	2018	24	63	0	0	A_43_P11871	NM_017230	11476.1	360.935	7.359604e+001	8.066685e+000	127	31	8.297428e+000	0	0	0	0	0	0	65.4707	1	1	54.4085	31.2258
DATA	2019	24	64	0	0	A_64_P060608	XM_001068783	11501.2	360.719	4.312948e+001	5.442176e+000	99.5	32	7.603055e+000	0	0	0	0	0	0	38.179	1	1	45.4864	31.5
DATA	2020	24	65	0	0	A_64_P115811	NM_001008516	11526.6	360.931	2.925007e+001	4.436352e+000	88	31	7.694014e+000	0	0	0	0	0	0	25.7646	1	1	53.8203	32.2581
DATA	2021	24	66	0	0	A_44_P131296	ENSRNOT00000039892	11552.5	361	4.129118e+001	5.318797e+000	95.5	34.5	6.964607e+000	0	0	0	0	0	0	36.1853	1	1	65	32.3333
DATA	2022	24	67	0	0	A_44_P668388	NM_001109245	11576.9	360.873	4.748871e+002	4.760807e+001	480	30	8.607168e+000	0	0	0	0	0	0	414.129	1	1	46.8651	30.6
DATA	2023	24	68	0	0	A_64_P069729	NM_019189	11602.7	360.882	6.724136e+001	7.528784e+000	120	30	6.197814e+000	0	0	0	0	0	0	58.3363	1	1	48.8603	31.2903
DATA	2024	24	69	1028	1	(+)E1A_r60_1	E1A_r60_1	11628.6	361.057	3.417378e+000	3.405068e+000	63	29	6.086827e+000	0	0	0	0	0	0	0.708605	0	0	47.8731	30.129
DATA	2025	24	70	0	0	A_64_P165441	NM_001109059	11653.5	361	5.297292e+001	6.306079e+000	106	29	1.019774e+001	0	0	0	0	0	0	45.4904	1	1	54.1152	33.0769
DATA	2026	24	71	0	0	A_44_P1034910	NM_201562	11678.8	361.026	4.758019e+003	4.758143e+002	4090.5	34	9.230939e+000	0	0	0	0	0	0	4065.09	1	1	49.1849	33.9091
DATA	2027	24	72	0	0	A_42_P631818	NM_030854	11704.6	361.132	3.470254e+000	3.456747e+000	58	32.5	7.842712e+000	0	0	0	0	0	0	-2.7614	0	0	46.8651	32.8333
DATA	2028	24	73	0	0	A_64_P095620	ENSRNOT00000031258	11729.8	361.014	5.380263e+001	6.404652e+000	108	32	8.664851e+000	0	0	0	0	0	0	45.4951	1	1	46.8651	32.2188
DATA	2029	24	74	0	0	A_42_P726573	NM_053838	11755.1	360.896	1.451542e+003	1.451962e+002	1234	33	7.456044e+000	0	0	0	0	0	0	1221.11	1	1	46.8651	33.5
DATA	2030	24	75	0	0	A_64_P029142	NM_001107866	11780.4	361.116	5.749936e+001	6.736670e+000	111	31	7.323624e+000	0	0	0	0	0	0	48.128	1	1	46.5243	29.7241
DATA	2031	24	76	0	0	A_43_P22902	NM_001106874	11806.4	361.328	3.542117e+000	3.528331e+000	48.5	28	5.347759e+000	0	0	0	0	0	0	-15.1858	0	0	44.0646	27.7931
DATA	2032	24	77	0	0	A_42_P619008	NM_001013079	11830.9	360.955	4.627327e+003	4.627462e+002	3942	25.5	6.948152e+000	0	0	0	0	0	0	3833.99	1	1	46.8651	26.1087
DATA	2033	24	78	0	0	A_64_P054421	A_64_P054421	11856.9	361.065	3.578180e+000	3.564253e+000	62	25.5	6.507392e+000	0	0	0	0	0	0	-1.00383	0	0	65	26.25
DATA	2034	24	79	0	0	A_42_P627330	NM_001106628	11881.9	361.014	5.000016e+002	5.012829e+001	464	27	7.828174e+000	0	0	0	0	0	0	410.122	1	1	46.8651	28.0303
DATA	2035	24	80	0	0	A_64_P049613	A_64_P049613	11907.4	361.082	3.669528e+001	5.140382e+000	95	31	7.686324e+000	0	0	0	0	0	0	29.95	1	1	48.2044	31.2903
DATA	2036	24	81	0	0	A_42_P708614	NM_001130505	11933.4	361.427	4.601341e+004	4.601343e+003	36809	28	5.200000e+000	0	0	0	1	0	0	37370.8	1	1	57.5363	28.04
DATA	2037	24	82	0	0	A_42_P660068	NM_031350	11958.1	361.125	2.206764e+003	2.207063e+002	1753	28	6.713874e+000	0	0	0	0	0	0	1783.69	1	1	46.8651	28.7105
DATA	2038	24	83	66	1	DarkCorner	DarkCorner	11983.6	361.15	3.666638e+000	3.652368e+000	55	31	8.690959e+000	0	0	0	0	0	0	-7.56796	0	0	50.4627	31.9259
DATA	2039	24	84	66	1	DarkCorner	DarkCorner	12009.1	361.507	3.683694e+000	3.669357e+000	57	30.5	7.884118e+000	0	0	0	0	0	0	-6.45443	0	0	47.8731	32.0526
DATA	2040	24	85	66	1	DarkCorner	DarkCorner	12034.6	361.231	3.701159e+000	3.686963e+000	63	29	8.226527e+000	0	0	0	0	0	0	0.312627	0	0	50.4627	29.5341
DATA	2041	25	1	66	1	DarkCorner	DarkCorner	9888.77	367.029	3.170466e+000	3.158126e+000	56	24	6.795116e+000	0	0	0	0	0	0	-3.625	0	0	46.8651	25.0775
DATA	2042	25	2	66	1	DarkCorner	DarkCorner	9914.11	367.093	3.153584e+000	3.141310e+000	56	29	7.492041e+000	0	0	0	0	0	0	-3.18348	0	0	47.5395	27.4545
DATA	2043	25	3	0	0	A_64_P106975	A_64_P106975	9939.7	367.1	2.023408e+002	2.047400e+001	251	27	4.639464e+000	0	0	0	0	0	0	190.224	1	1	47.2035	26.8966
DATA	2044	25	4	0	0	A_42_P799702	NM_145093	9964.8	367.319	5.457685e+002	5.466540e+001	563	27	5.593415e+000	0	0	0	1	0	0	515.579	1	1	46.8651	26.5625
DATA	2045	25	5	0	0	A_42_P704429	NM_053428	9990.47	367.343	2.888203e+004	2.888204e+003	26493	33	7.435052e+000	0	0	0	0	0	0	27412.7	1	1	46.8651	32
DATA	2046	25	6	0	0	A_64_P129730	NM_001033896	10015.9	367.386	1.046168e+002	1.090617e+001	158.5	30	7.457406e+000	0	0	0	0	0	0	99.7344	1	1	57.259	29.5
DATA	2047	25	7	0	0	A_64_P156308	NM_001008284	10041.1	367.658	8.267647e+002	8.273341e+001	847.5	27	6.982932e+000	0	0	0	0	0	0	791.48	1	1	49.1849	27.9429
DATA	2048	25	8	0	0	A_44_P152029	A_44_P152029	10066.6	367.427	1.067072e+001	3.237878e+000	70	30	5.687334e+000	0	0	0	0	0	0	10.2555	1	0	57.5363	27.9063
DATA	2049	25	9	0	0	A_42_P751152	NM_001106360	10092.1	367.407	4.687917e+004	4.687918e+003	44368.5	30	6.879922e+000	0	0	0	0	0	0	45223.6	1	1	56.9804	28
DATA	2050	25	10	0	0	A_64_P010494	NM_001001421	10117.6	367.247	1.537965e+002	1.567626e+001	210	27.5	6.244446e+000	0	0	0	0	0	0	148.881	1	1	48.5334	27.2
DATA	2051	25	11	0	0	A_64_P054606	NM_001107279	10142.8	367.194	4.088749e+002	4.099926e+001	458	26	5.343874e+000	0	0	0	0	0	0	397.086	1	1	46.1809	26.0968
DATA	2052	25	12	0	0	A_44_P335679	NM_001108168	10168.4	367.427	2.620932e+001	3.995623e+000	83	25	7.066596e+000	0	0	0	0	0	0	25.5326	1	1	65	25.8333
DATA	2053	25	13	0	0	A_64_P128766	NM_001034912	10193.4	367.74	1.321730e+002	1.355514e+001	187.5	32	9.359586e+000	0	0	0	0	0	0	129.123	1	1	49.5074	32.75
DATA	2054	25	14	0	0	A_42_P595591	NM_031011	10218.7	367.753	1.881779e+004	1.881781e+003	17449	31	7.983055e+000	0	0	0	0	0	0	18431	1	1	48.2044	32.3333
DATA	2055	25	15	0	0	A_44_P962846	ENSRNOT00000058887	10244.5	367.853	2.483691e+002	2.501653e+001	297.5	29	1.071709e+001	0	0	0	0	0	0	243.853	1	1	49.8279	31.4516
DATA	2056	25	16	0	0	A_64_P111878	XR_005569	10269.6	368.049	1.680790e+003	1.681056e+002	1785	25	5.958317e+000	0	0	0	0	0	0	1653.79	1	1	43.7019	25.6923
DATA	2057	25	17	0	0	A_64_P149225	NM_001100833	10295.4	367.427	1.128292e+005	1.128292e+004	110766	32	9.613366e+000	0	0	0	0	0	0	111227	1	1	57.5363	32.6286
DATA	2058	25	18	0	0	A_64_P032361	ENSRNOT00000061428	10320.4	367.438	1.116674e+003	1.117070e+002	1140	30.5	9.769296e+000	0	0	0	0	0	0	1102.68	1	1	48.2044	30.4286
DATA	2059	25	19	0	0	A_64_P038843	A_64_P038843	10346.1	367.477	1.563963e+001	3.357295e+000	74	26	8.909736e+000	0	0	0	0	0	0	15.4673	1	1	55.8519	26.2609
DATA	2060	25	20	1028	1	(+)E1A_r60_a97	E1A_r60_a97	10371.5	367.5	2.978491e+000	2.966899e+000	58	24.5	7.101723e+000	0	0	0	0	0	0	-4.36397	0	0	57.5363	26.2188
DATA	2061	25	21	0	0	A_42_P586883	NM_001106416	10396.7	367.5	4.573539e+001	5.449841e+000	108	30	8.795968e+000	0	0	0	0	0	0	45.3394	1	1	57.5363	30.4643
DATA	2062	25	22	0	0	A_42_P626023	NM_001107265	10422.1	367.957	6.716295e+002	6.722819e+001	721	29	7.108848e+000	0	0	0	0	0	0	666.438	1	1	46.8651	29.4167
DATA	2063	25	23	0	0	A_64_P304646	ENSRNOT00000046873	10447.5	367.5	5.446716e+001	6.198612e+000	115.5	28	6.338889e+000	0	0	0	0	0	0	54.0801	1	1	65	29.7714
DATA	2064	25	24	0	0	A_42_P540711	NM_133568	10473.1	367.708	1.151494e+004	1.151498e+003	11579	31.5	5.994155e+000	0	0	0	0	0	0	11438.9	1	1	53.2255	31.6786
DATA	2065	25	25	0	0	A_64_P079149	XM_001063529	10498.2	367.324	7.347183e+001	7.919870e+000	130	33	7.432945e+000	0	0	0	0	0	0	73.0032	1	1	48.8603	33.7143
DATA	2066	25	26	0	0	A_42_P507072	FQ213070	10523.6	367.392	3.767113e+003	3.767229e+002	3636	29.5	8.052186e+000	0	0	0	0	0	0	3743.41	1	1	49.1849	31.4688
DATA	2067	25	27	0	0	A_44_P314270	ENSRNOT00000015469	10548.7	367.514	2.189396e+002	2.209274e+001	277	26	7.110865e+000	0	0	0	0	0	0	217.541	1	1	48.2044	26.2424
DATA	2068	25	28	0	0	A_64_P026098	ENSRNOT00000027092	10574.5	367.5	1.036691e+002	1.078062e+001	163	26	7.476649e+000	0	0	0	0	0	0	102.975	1	1	57.5363	27.1481
DATA	2069	25	29	0	0	A_64_P018599	XM_229548	10600	367.545	2.970881e+000	2.959318e+000	58	31	7.000000e+000	0	0	0	0	0	0	-3.61937	0	0	55.8519	30
DATA	2070	25	30	0	0	A_43_P15907	NM_001134567	10625.4	367.573	4.556422e+001	5.434197e+000	103.5	30	9.075194e+000	0	0	0	0	0	0	45.2057	1	1	57.5363	29.6774
DATA	2071	25	31	0	0	A_64_P151804	A_64_P151804	10650.3	368.167	6.154115e+001	6.830548e+000	122.5	26.5	8.535341e+000	0	0	0	0	0	0	61.0092	1	1	45.835	27.2353
DATA	2072	25	32	0	0	A_42_P642743	NM_017005	10675.4	368.29	1.300682e+004	1.300685e+003	12642	30	8.701113e+000	0	0	0	0	0	0	12881.2	1	1	46.8651	32.069
DATA	2073	25	33	0	0	A_42_P630463	NM_022238	10701.4	368.265	5.618674e+002	5.626520e+001	616	31	7.705834e+000	0	0	0	0	0	0	555.746	1	1	46.5243	30.8108
DATA	2074	25	34	0	0	A_64_P119533	NM_001000351	10727	367.545	1.831873e+001	3.493642e+000	77	29	4.483214e+000	0	0	0	0	0	0	18.092	1	1	65	28.8929
DATA	2075	25	35	0	0	A_64_P158068	FQ219182	10752	368.078	3.760355e+003	3.760473e+002	3627	27	5.099020e+000	0	0	0	0	0	0	3708.29	1	1	46.1809	27.6
DATA	2076	25	36	0	0	A_64_P000779	XM_225838	10777.6	367.971	3.599071e+001	4.675561e+000	96	28.5	7.305800e+000	0	0	0	0	0	0	35.4298	1	1	46.1809	29.0667
DATA	2077	25	37	0	0	A_44_P630082	ENSRNOT00000020640	10802.9	368	1.973572e+002	1.996097e+001	256	27	6.743810e+000	0	0	0	0	0	0	193.913	1	1	46.8651	26.5135
DATA	2078	25	38	0	0	A_42_P717654	XM_001063683	10828.2	367.842	4.898286e+003	4.898378e+002	4723.5	31	6.956703e+000	0	0	0	0	0	0	4802.77	1	1	48.8603	30.2941
DATA	2079	25	39	0	0	A_42_P792382	NM_017257	10853.6	368.081	7.132366e+003	7.132429e+002	6921	29	7.792153e+000	0	0	0	0	0	0	6977.95	1	1	48.8603	30.4
DATA	2080	25	40	0	0	A_64_P075035	NM_001001014	10879.4	367.573	1.592810e+002	1.621012e+001	225	30	8.045653e+000	0	0	0	0	0	0	155.445	1	1	57.5363	30.1944
DATA	2081	25	41	0	0	A_64_P021281	NM_001039022	10904.6	367.985	5.412962e+003	5.413046e+002	5186	28.5	9.271051e+000	0	0	0	0	0	0	5269.58	1	1	45.4864	30.7857
DATA	2082	25	42	0	0	A_44_P729533	TC581820	10930	368.172	6.071696e+003	6.071771e+002	5870.5	31	1.067417e+001	0	0	0	0	0	0	5895.15	1	1	45.4864	34.0571
DATA	2083	25	43	0	0	A_42_P802358	NM_001024341	10955.1	367.884	1.415986e+004	1.415989e+003	13475	31	9.289230e+000	0	0	0	0	0	0	13709.2	1	1	46.8651	32.3514
DATA	2084	25	44	0	0	A_42_P481087	XM_232226	10980.4	368.299	7.756985e+002	7.762953e+001	797	32	9.179884e+000	0	0	0	0	0	0	748.828	1	1	46.1809	33.7027
DATA	2085	25	45	0	0	A_42_P561597	NM_001106486	11006.2	368.406	1.037330e+004	1.037335e+003	9813	33	9.182739e+000	0	0	0	0	0	0	9982.56	1	1	46.5243	32.9714
DATA	2086	25	46	0	0	A_64_P113381	A_64_P113381	11031.4	368.027	1.138893e+001	3.267926e+000	74	30.5	9.658776e+000	0	0	0	0	0	0	10.9241	1	0	48.5334	32.4667
DATA	2087	25	47	0	0	A_64_P088695	NM_001134414	11056.5	368.12	1.581477e+003	1.581775e+002	1477	30	7.806807e+000	0	0	0	0	0	0	1511.91	1	1	48.8603	31.2903
DATA	2088	25	48	0	0	A_44_P728586	ENSRNOT00000013367	11082	368.095	1.444343e+003	1.444672e+002	1433.5	32	9.814955e+000	0	0	0	0	0	0	1375.97	1	1	46.8651	34
DATA	2089	25	49	0	0	A_42_P544898	NM_001108279	11107.6	367.931	2.006293e+001	3.688711e+000	81.5	35	7.741736e+000	0	0	0	0	0	0	19.0431	1	1	53.8203	33.3704
DATA	2090	25	50	0	0	A_44_P432910	NM_012814	11133.5	368	1.342582e+005	1.342582e+004	127327	37	7.717790e+000	0	0	0	0	0	0	126950	1	1	54.1152	36.9167
DATA	2091	25	51	0	0	A_64_P157820	XM_001079095	11158.5	368	9.807608e+001	1.029161e+001	150.5	29.5	9.025817e+000	0	0	0	0	0	0	92.3868	1	1	48.5334	30.6818
DATA	2092	25	52	0	0	A_42_P601802	NM_134465	11183.7	368.067	3.304201e+003	3.304350e+002	3039	29	8.224668e+000	0	0	0	0	0	0	3100.38	1	1	49.1849	30.6129
DATA	2093	25	53	0	0	A_64_P039737	NM_001130508	11209.3	368.1	6.085207e+002	6.093323e+001	608	29	7.802446e+000	0	0	0	0	0	0	568.65	1	1	47.2035	30.5333
DATA	2094	25	54	0	0	A_42_P648800	AA998304	11234.5	368	9.880536e+001	1.037267e+001	152	32.5	6.746509e+000	0	0	0	0	0	0	91.9496	1	1	54.1152	31.6538
DATA	2095	25	55	0	0	A_64_P007009	ENSRNOT00000014567	11259.9	368.111	3.016972e+003	3.017139e+002	2859.5	30	6.316667e+000	0	0	0	0	0	0	2795.74	1	1	45.4864	29.8519
DATA	2096	25	56	0	0	A_64_P049527	TC606896	11285.4	368.232	1.857080e+002	1.884183e+001	232	31	7.306942e+000	0	0	0	0	0	0	171.344	1	1	46.8651	31.4839
DATA	2097	25	57	0	0	A_44_P281595	NM_001037556	11310.7	368.055	5.955705e+001	6.760250e+000	117.5	31	5.709768e+000	0	0	0	0	0	0	54.7067	1	1	47.8731	31.5833
DATA	2098	25	58	0	0	A_44_P374638	NM_024391	11336.5	368	5.562803e+001	6.424148e+000	112	31	4.614113e+000	0	0	0	0	0	0	50.8637	1	1	54.1152	30.3636
DATA	2100	25	60	0	0	A_64_P046416	A_64_P046416	11387.5	368	8.857272e+001	9.432384e+000	141.5	31.5	5.862355e+000	0	0	0	0	0	0	80.2377	1	1	54.1152	32.2353
DATA	2101	25	61	0	0	A_44_P428560	NM_001001358	11412.4	368.149	7.366089e+001	8.054521e+000	132	34	7.612136e+000	0	0	0	0	0	0	66.4222	1	1	48.5334	31.7692
DATA	2102	25	62	0	0	A_44_P208887	NM_001105774	11438	368	1.192745e+002	1.236866e+001	172.5	30	6.896260e+000	0	0	0	0	0	0	107.032	1	1	54.9904	30.4074
DATA	2103	25	63	0	0	A_42_P533792	NM_001106575	11462.7	368.219	1.065236e+004	1.065241e+003	9049	33.5	9.757080e+000	0	0	0	0	0	0	9514.43	1	1	48.2044	36.6563
DATA	2104	25	64	0	0	A_42_P802550	NM_017365	11488.2	368.304	3.216854e+002	3.233793e+001	341	33	8.715454e+000	0	0	0	0	0	0	285.919	1	1	46.8651	32.3226
DATA	2105	25	65	0	0	A_42_P545129	ENSRNOT00000007554	11513.8	368.116	8.411218e+002	8.417776e+001	786	33	8.473234e+000	0	0	0	0	0	0	743.863	1	1	46.5243	32.0645
DATA	2106	25	66	0	0	A_42_P500675	NM_013179	11539.6	368.352	5.728460e+002	5.738182e+001	583	30	9.157806e+000	0	0	0	0	0	0	504.071	1	1	47.8731	30.7941
DATA	2107	25	67	0	0	A_44_P127238	NM_001127655	11564.6	368.352	9.158584e+002	9.164728e+001	830	33	7.995191e+000	0	0	0	0	0	0	801.931	1	1	47.8731	31
DATA	2108	25	68	0	0	A_64_P042142	ENSRNOT00000027371	11590	368.369	1.280927e+002	1.324576e+001	176	30	6.387097e+000	0	0	0	0	0	0	111.596	1	1	45.4864	28.5882
DATA	2109	25	69	0	0	A_44_P279756	NM_022848	11615.3	368.068	3.402921e+000	3.389677e+000	59.5	27	9.535415e+000	0	0	0	0	0	0	-2.27586	0	0	52.6241	30.8
DATA	2110	25	70	0	0	A_64_P119597	NM_001106871	11641.2	368.43	9.041814e+000	3.524999e+000	69.5	31	1.072681e+001	0	0	0	0	0	0	7.7971	1	0	58.0869	32.5758
DATA	2111	25	71	0	0	A_44_P790674	NM_001191933	11666.5	368.352	3.922681e+001	5.207163e+000	97	31.5	8.947512e+000	0	0	0	0	0	0	33.6546	1	1	57.5363	32.6667
DATA	2112	25	72	0	0	A_44_P405618	ENSRNOT00000025426	11691.4	368.479	2.537758e+002	2.560988e+001	274	32	8.646461e+000	0	0	0	0	0	0	216.644	1	1	48.2044	31.8065
DATA	2113	25	73	0	0	A_42_P719478	NM_001191779	11717.4	368.427	2.476511e+001	4.254707e+000	85.5	31	7.961186e+000	0	0	0	0	0	0	21.0311	1	1	57.5363	32.3415
DATA	2114	25	74	0	0	A_64_P061424	A_64_P061424	11742.6	368.427	2.308043e+001	4.173508e+000	83.5	34	7.516166e+000	0	0	0	0	0	0	19.5015	1	1	57.5363	32.8333
DATA	2115	25	75	0	0	A_44_P1042876	NM_212504	11767.4	368.311	3.702492e+003	3.702656e+002	3066	33.5	5.719736e+000	0	0	0	0	0	0	3112.72	1	1	48.5334	33.3462
DATA	2116	25	76	0	0	A_44_P470043	NM_001108103	11793.3	368.569	1.111259e+002	1.165452e+001	157	29	7.974035e+000	0	0	0	0	0	0	92.9492	1	1	48.5334	31.9091
DATA	2117	25	77	0	0	A_64_P108484	ENSRNOT00000046584	11818.7	368.5	4.432344e+001	5.666532e+000	100	28	8.520496e+000	0	0	0	0	0	0	36.8862	1	1	57.5363	28.5667
DATA	2118	25	78	0	0	A_42_P666065	NM_001014069	11844.4	368.427	4.696569e+001	1.112038e+001	77	26	7.186098e+000	0	0	0	1	0	0	38.8857	1	1	57.5363	26
DATA	2119	25	79	0	0	A_64_P136571	NM_001134545	11869.4	368.577	8.306684e+001	9.039699e+000	130	24	5.537235e+000	0	0	0	0	0	0	68.4423	1	1	47.8731	24.7407
DATA	2120	25	80	0	0	A_42_P816740	NM_001108705	11894.7	368.556	3.801158e+002	3.818012e+001	370	28	7.302239e+000	0	0	0	0	0	0	311.65	1	1	48.5334	28.1714
DATA	2121	25	81	0	0	A_64_P018142	NM_001100716	11920.5	368.5	2.222148e+002	2.251142e+001	244.5	31	6.500620e+000	0	0	0	0	0	0	181.284	1	1	57.5363	31.25
DATA	2122	25	82	0	0	A_42_P779687	ENSRNOT00000034449	11945.4	368.466	5.925983e+003	5.926094e+002	4746	28.5	7.919431e+000	0	0	0	0	0	0	4811.46	1	1	49.1849	29.75
DATA	2124	25	84	66	1	DarkCorner	DarkCorner	11996.2	368.458	3.667364e+000	3.653090e+000	57	33	7.066538e+000	0	0	0	0	0	0	-4.01636	0	0	47.8731	31.6897
DATA	2125	25	85	66	1	DarkCorner	DarkCorner	12022.1	368.5	3.684734e+000	3.670393e+000	57	29.5	8.045215e+000	0	0	0	0	0	0	-4.41914	0	0	56.9804	29.5
DATA	2126	26	1	66	1	DarkCorner	DarkCorner	9901.58	374.573	3.157915e+000	3.145625e+000	55.5	29	8.346233e+000	0	0	0	0	0	0	-2.89174	0	0	65	28.9804
DATA	2127	26	2	66	1	DarkCorner	DarkCorner	9927.13	374.554	3.141489e+000	3.129262e+000	54	26	7.510606e+000	0	0	0	0	0	0	-3.8322	0	0	42.9674	26.7333
DATA	2128	26	3	0	0	A_42_P713844	NM_001106167	9952.07	374.507	8.904563e+002	8.910007e+001	877	27	5.380777e+000	0	0	0	0	0	0	840.116	1	1	47.8731	27.3235
DATA	2129	26	4	0	0	A_42_P627219	NM_001012468	9977.79	374.671	8.751450e+003	8.751505e+002	8201	29	7.668491e+000	0	0	0	0	0	0	8296.52	1	1	47.2035	29.7667
DATA	2130	26	5	0	0	A_42_P461003	NM_001044283	10002.7	374.778	1.243120e+004	1.243124e+003	11576	31	7.044711e+000	0	0	0	0	0	0	11837.3	1	1	47.5395	30.1935
DATA	2131	26	6	0	0	A_44_P1019923	NM_022522	10028.6	375	1.977713e+003	1.977952e+002	1934	30	6.174170e+000	0	0	0	0	0	0	1891.49	1	1	48.5334	28.25
DATA	2132	26	7	0	0	A_42_P814056	NM_001108866	10053.9	374.805	8.800428e+003	8.800481e+002	8451.5	27.5	7.285372e+000	0	0	0	0	0	0	8450.38	1	1	53.2255	28.1176
DATA	2133	26	8	0	0	A_42_P795269	NM_001134730	10079.2	375.141	8.540382e+003	8.540436e+002	8132	31	6.020095e+000	0	0	0	0	0	0	8232.22	1	1	45.4864	30.1923
DATA	2134	26	9	0	0	A_42_P763522	NM_001013980	10104.4	374.658	2.429047e+003	2.429237e+002	2369	30	8.444297e+000	0	0	0	0	0	0	2349.58	1	1	48.5334	28.8846
DATA	2135	26	10	0	0	A_44_P292437	NM_153309	10129.8	375.015	2.356907e+002	2.376266e+001	287	27	5.322502e+000	0	0	0	0	0	0	228.758	1	1	46.1809	26.9355
DATA	2136	26	11	0	0	A_64_P065313	ENSRNOT00000042070	10155.2	374.8	1.729520e+002	1.755650e+001	225	25	5.293925e+000	0	0	0	0	0	0	168.385	1	1	46.5243	24.8889
DATA	2137	26	12	0	0	A_64_P008047	NM_001033670	10180.7	374.9	2.878913e+004	2.878914e+003	27497	27.5	7.005827e+000	0	0	0	0	0	0	28111.4	1	1	47.2035	27.4333
DATA	2138	26	13	0	0	A_64_P080612	TC638889	10206.2	375.323	6.260249e+003	6.260321e+002	6096	30.5	6.961226e+000	0	0	0	0	0	0	6129.69	1	1	45.4864	32.1563
DATA	2139	26	14	0	0	A_43_P17696	NM_001004257	10231.4	375.188	2.655194e+003	2.655362e+002	2571	29.5	6.013873e+000	0	0	0	0	0	0	2606.15	1	1	47.2035	28.5
DATA	2140	26	15	0	0	A_64_P019608	NM_001105713	10257.2	375.197	6.633906e+002	6.640625e+001	683	27	7.885218e+000	0	0	0	0	0	0	652.626	1	1	45.835	26.48
DATA	2141	26	16	0	0	A_64_P108575	ENSRNOT00000046600	10282.5	374.648	4.462609e+001	5.366482e+000	102	27	8.366343e+000	0	0	0	0	0	0	43.9882	1	1	57.5363	27.9355
DATA	2142	26	17	0	0	A_64_P136859	NM_001109642	10307.9	374.61	5.519262e+003	5.519342e+002	5500.5	31	8.822106e+000	0	0	0	0	0	0	5450.23	1	1	49.8279	31.7273
DATA	2143	26	18	0	0	A_64_P021597	A_64_P021597	10333.5	374.636	2.982029e+000	2.979542e+000	62	30	1.019860e+001	0	0	0	0	0	0	2.30394	0	0	45.835	29.3704
DATA	2144	26	19	0	0	A_64_P148032	A_64_P148032	10358.8	374.912	2.098615e+002	2.119473e+001	277	25.5	7.596849e+000	0	0	0	0	0	0	207.868	1	1	46.5243	26.5
DATA	2145	26	20	0	0	A_42_P743580	NM_017214	10384	375	7.842781e+003	7.842837e+002	7740	28	7.566480e+000	0	0	0	0	0	0	7777.5	1	1	46.8651	29.5806
DATA	2146	26	21	0	0	A_42_P693964	NM_181087	10409.2	375	1.497785e+003	1.498077e+002	1486	28	7.775252e+000	0	0	0	0	0	0	1486.77	1	1	46.8651	28.7273
DATA	2147	26	22	0	0	A_44_P1058389	NM_012992	10435	375	1.398256e+004	1.398259e+003	13618	29	6.158686e+000	0	0	0	0	0	0	13890.6	1	1	51.4001	30.8
DATA	2148	26	23	0	0	A_44_P135224	NM_022187	10460.5	375	2.304446e+002	2.323325e+001	285	29.5	6.427558e+000	0	0	0	0	0	0	229.061	1	1	54.1152	29.9063
DATA	2149	26	24	0	0	A_64_P070249	ENSRNOT00000048236	10485.4	375	7.766324e+002	7.771943e+001	813	33	6.014939e+000	0	0	0	0	0	0	772.251	1	1	48.5334	32.4444
DATA	2150	26	25	0	0	A_42_P806899	NM_001108829	10510.6	374.958	6.326051e+001	6.981848e+000	123.5	28	8.849756e+000	0	0	0	0	0	0	62.9145	1	1	48.2044	30.5455
DATA	2151	26	26	0	0	A_42_P465144	NM_001107714	10536.5	375	3.980449e+001	4.956962e+000	103	27.5	7.146175e+000	0	0	0	0	0	0	39.5863	1	1	54.1152	27.9667
DATA	2152	26	27	0	0	A_43_P19712	NM_001106751	10561.9	374.947	1.012155e+001	3.123423e+000	70	24	7.035242e+000	0	0	0	0	0	0	10.0639	1	0	47.5395	24.8065
DATA	2153	26	28	0	0	A_42_P728472	NM_001007600	10586.9	374.786	7.434156e+003	7.434214e+002	7083	29	7.355821e+000	0	0	0	0	0	0	7388.74	1	1	46.8651	30
DATA	2154	26	29	66	-1	(-)3xSLv1	NegativeControl	10613.6	375.237	2.969338e+000	2.957781e+000	52	29	8.511692e+000	0	0	0	0	0	0	-9.15164	0	0	42.9674	28.4524
DATA	2155	26	30	0	0	A_42_P629394	NM_031683	10638	375	2.672915e+003	2.673079e+002	2544	31	9.356674e+000	0	0	0	0	0	0	2653.02	1	1	51.4001	30.2121
DATA	2156	26	31	0	0	A_64_P041977	A_64_P041977	10663.5	375	6.025958e+001	6.714983e+000	118.5	28	6.253115e+000	0	0	0	0	0	0	59.7538	1	1	54.1152	28.6667
DATA	2157	26	32	0	0	A_44_P126406	XM_228958	10688.6	375.239	6.107152e+003	6.107224e+002	6177.5	30	6.528745e+000	0	0	0	0	0	0	6049.29	1	1	46.5243	29.5217
DATA	2158	26	33	0	0	A_64_P021878	NM_001167664	10714.6	375.1	5.231375e+001	6.015743e+000	115	30	6.259377e+000	0	0	0	0	0	0	51.7479	1	1	47.5395	29.4138
DATA	2159	26	34	0	0	A_64_P058719	NM_001014175	10739.4	374.972	7.170045e+003	7.170107e+002	6966	27	5.474338e+000	0	0	0	0	0	0	7082.1	1	1	48.2044	27.8261
DATA	2160	26	35	0	0	A_42_P495579	NM_001107564	10764.7	375	2.594583e+002	2.611634e+001	322	28	6.806859e+000	0	0	0	0	0	0	255.856	1	1	49.1849	30
DATA	2161	26	36	0	0	A_64_P054979	NM_001109615	10790.5	375.206	7.544940e+001	8.113898e+000	136	26	6.436503e+000	0	0	0	0	0	0	74.2666	1	1	46.5243	25.4286
DATA	2162	26	37	0	0	A_44_P713838	ENSRNOT00000032874	10815.8	375.04	1.236622e+002	1.272274e+001	183	32	7.433604e+000	0	0	0	0	0	0	121.481	1	1	48.2044	29.8824
DATA	2163	26	38	0	0	A_64_P158913	NM_001108101	10841.4	375.069	3.008946e+000	3.004297e+000	64	31	7.688375e+000	0	0	0	0	0	0	2.01802	0	0	53.8203	31.5556
DATA	2164	26	39	0	0	A_43_P13018	NM_054004	10866.1	375.127	1.427091e+004	1.427094e+003	13922	30.5	7.444344e+000	0	0	0	0	0	0	13957.9	1	1	46.8651	30.3056
DATA	2165	26	40	0	0	A_64_P114383	A_64_P114383	10891.8	375.411	2.182167e+004	2.182169e+003	21641.5	32	8.533541e+000	0	0	0	0	0	0	21291	1	1	52.6241	32.1081
DATA	2166	26	41	0	0	A_43_P16629	XM_001080634	10917	375.104	4.703056e+003	4.703153e+002	4578	29	8.628349e+000	0	0	0	0	0	0	4576.72	1	1	46.8651	31.6786
DATA	2167	26	42	0	0	A_42_P810313	NM_001108677	10942.6	375.427	9.318255e+001	9.797698e+000	145	31	8.673777e+000	0	0	0	0	0	0	90.4327	1	1	57.5363	32.0882
DATA	2168	26	43	0	0	A_42_P537516	NM_001106023	10967.9	375.239	1.170696e+004	1.170700e+003	11210	32	9.324045e+000	0	0	0	1	0	0	11328.5	1	1	46.8651	32.0571
DATA	2169	26	44	0	0	A_64_P006964	A_64_P006964	10993.3	375.079	1.601463e+002	1.630163e+001	217.5	28	8.655976e+000	0	0	0	0	0	0	154.499	1	1	45.1352	30.5
DATA	2170	26	45	0	0	A_42_P829251	NM_133381	11019	375.455	1.339604e+001	3.335829e+000	74	33.5	9.046917e+000	0	0	0	0	0	0	12.883	1	0	55.8519	32.8235
DATA	2171	26	46	0	0	A_42_P687443	NM_020100	11044.4	375.427	1.815916e+002	1.841603e+001	240	32.5	9.920141e+000	0	0	0	0	0	0	174.063	1	1	57.5363	32.9333
DATA	2172	26	47	0	0	A_44_P196146	NM_031349	11069.3	375.442	1.508576e+002	1.539604e+001	207	30	7.521559e+000	0	0	0	0	0	0	144.121	1	1	49.8279	30.5769
DATA	2173	26	48	0	0	A_64_P050137	ENSRNOT00000058586	11095.4	375.427	2.551850e+002	2.570449e+001	306	29	8.143207e+000	0	0	0	0	0	0	242.902	1	1	57.5363	30.6129
DATA	2174	26	49	0	0	A_44_P637827	NM_001108797	11120.3	375.312	3.503750e+003	3.503887e+002	3329.5	35	6.769635e+000	0	0	0	0	0	0	3323.1	1	1	49.8279	36.8065
DATA	2175	26	50	0	0	A_64_P070073	NM_001109590	11145.9	375.5	1.321980e+002	1.358057e+001	181.5	34	7.351485e+000	0	0	0	0	0	0	124.91	1	1	65	33.4828
DATA	2176	26	51	0	0	A_64_P130572	NM_001109400	11170.7	375.222	1.464211e+003	1.464544e+002	1376.5	30	8.679149e+000	0	0	0	0	0	0	1378.19	1	1	47.5395	30.5926
DATA	2177	26	52	0	0	A_42_P658815	NM_198745	11196.4	375.043	1.317520e+003	1.317892e+002	1277	29	6.901224e+000	0	0	0	0	0	0	1235.1	1	1	46.8651	30.2424
DATA	2179	26	54	0	0	A_43_P14809	TC581403	11247.3	375.662	1.204063e+003	1.204478e+002	1195	31	6.141328e+000	0	0	0	0	0	0	1119.53	1	1	48.5334	30.8182
DATA	2180	26	55	0	0	A_42_P553319	TC597248	11272.9	375.5	1.141658e+002	1.184948e+001	165	31	4.451656e+000	0	0	0	0	0	0	105.691	1	1	56.9804	30.9
DATA	2181	26	56	0	0	A_64_P004162	NM_019139	11298.1	375.087	6.423542e+000	3.251720e+000	67	32.5	7.457851e+000	0	0	0	0	0	0	5.92055	1	0	46.8651	32.3667
DATA	2182	26	57	0	0	A_64_P032450	NM_172330	11323.6	375.13	2.215708e+002	2.238723e+001	268	31	5.589469e+000	0	0	0	0	0	0	203.314	1	1	46.8651	30.6296
DATA	2183	26	58	0	0	A_44_P470976	NM_001013133	11348.8	375.463	4.008528e+001	5.139213e+000	98	31.5	6.370726e+000	0	0	0	0	0	0	36.6197	1	1	46.5243	32.1154
DATA	2184	26	59	0	0	A_64_P166428	NM_001037205	11374.5	375.5	1.248511e+002	1.289643e+001	174.5	30.5	7.057083e+000	0	0	0	0	0	0	113.528	1	1	57.5363	31.4375
DATA	2185	26	60	0	0	A_43_P11576	NM_012821	11399.7	375.5	1.184291e+001	3.455343e+000	74	33.5	7.492854e+000	0	0	0	0	0	0	10.7192	1	0	57.5363	31.9286
DATA	2186	26	61	0	0	A_64_P156910	A_64_P156910	11425.4	375.573	2.119067e+002	2.144021e+001	249	35	8.830251e+000	0	0	0	0	0	0	190.884	1	1	57.5363	34.16
DATA	2187	26	62	0	0	A_64_P126140	NM_001191648	11450.6	375.573	8.866747e+001	9.452978e+000	146.5	32.5	7.788881e+000	0	0	0	0	0	0	79.4928	1	1	57.5363	34.3333
DATA	2188	26	63	0	0	A_42_P637122	NM_001108351	11475.7	375.707	2.092135e+003	2.092395e+002	1880	35.5	1.576643e+001	0	0	0	0	0	0	1866.74	1	1	49.1849	39.3611
DATA	2189	26	64	0	0	A_64_P081208	NM_001009712	11500.9	375.507	1.019553e+004	1.019559e+003	8614.5	33	7.550720e+000	0	0	0	0	0	0	9052.71	1	1	47.8731	31.3235
DATA	2190	26	65	0	0	A_42_P465608	NM_130894	11526.5	375.608	3.127460e+003	3.127637e+002	2759.5	30	9.403517e+000	0	0	0	0	0	0	2763.18	1	1	49.1849	31.6364
DATA	2191	26	66	0	0	A_42_P485589	NM_017246	11551.8	375.451	1.142966e+002	1.190823e+001	164	33	8.581801e+000	0	0	0	0	0	0	100.482	1	1	47.5395	32.7742
DATA	2192	26	67	0	0	A_64_P031383	NM_020308	11577.4	375.556	7.142872e+002	7.150765e+001	693	30	7.073063e+000	0	0	0	0	0	0	624.816	1	1	48.2044	28.8125
DATA	2193	26	68	0	0	A_44_P220647	NM_001107097	11602.8	375.754	7.909101e+001	8.599310e+000	129.5	28	7.325663e+000	0	0	0	0	0	0	68.8402	1	1	45.1352	30.4643
DATA	2194	26	69	0	0	A_44_P294687	NM_080885	11628.1	375.536	4.429101e+002	4.442076e+001	442	32	7.337766e+000	0	0	0	1	0	0	383.554	1	1	47.5395	31.9697
DATA	2195	26	70	0	0	A_42_P512838	NM_001106884	11653.5	375.711	8.234585e+002	8.241642e+001	752	32	8.697840e+000	0	0	0	0	0	0	709.523	1	1	49.1849	32.037
DATA	2196	26	71	0	0	A_42_P635228	NM_001107651	11679.2	375.903	6.038125e+001	6.942957e+000	115.5	28	7.588415e+000	0	0	0	0	0	0	51.7631	1	1	46.8651	29.7407
DATA	2197	26	72	0	0	A_44_P254687	NM_001105728	11703.4	376	2.017117e+002	2.046302e+001	239	32	7.895536e+000	0	0	0	0	0	0	172.091	1	1	40.6843	33.1143
DATA	2198	26	73	0	0	A_64_P049628	NM_001169145	11730	375.545	6.072403e+003	6.072502e+002	5056	34	8.737411e+000	0	0	0	0	0	0	5152.65	1	1	55.8519	33.1351
DATA	2199	26	74	0	0	A_64_P007703	NM_031674	11755.4	375.573	1.291046e+002	1.337127e+001	174	34	7.358812e+000	0	0	0	0	0	0	108.996	1	1	57.5363	32.8214
DATA	2200	26	75	0	0	A_42_P645376	NM_001014135	11780.6	375.479	3.164222e+004	3.164224e+003	26273	31	8.393162e+000	0	0	0	1	0	0	26580	1	1	48.2044	32.3871
DATA	2201	26	76	0	0	A_64_P040920	XM_577408	11806.1	376.048	4.564710e+003	4.564845e+002	3990	29	6.619991e+000	0	0	0	0	0	0	3815.65	1	1	45.1352	29.2083
DATA	2202	26	77	0	0	A_42_P819656	NM_130409	11830.8	375.875	2.930726e+003	2.930939e+002	2415	28	8.298290e+000	0	0	0	0	0	0	2437.8	1	1	47.5395	28.0444
DATA	2203	26	78	0	0	A_64_P018921	NM_001135012	11856.8	375.931	4.876358e+002	4.889263e+001	465	26	7.087962e+000	0	0	0	0	0	0	403.566	1	1	47.5395	26.6279
DATA	2204	26	79	0	0	A_43_P15253	NM_012967	11882.1	375.974	1.978068e+002	2.009981e+001	219	24	5.951528e+000	0	0	0	0	0	0	162.905	1	1	48.5334	25.6
DATA	2205	26	80	0	0	A_64_P093063	NM_001136272	11907.5	376	4.021409e+002	4.037357e+001	380	29	8.139657e+000	0	0	0	0	0	0	329.57	1	1	54.1152	30.4333
DATA	2206	26	81	0	0	A_44_P477406	NM_012751	11933.4	375.931	3.364902e+002	3.384134e+001	338	31	6.933734e+000	0	0	0	0	0	0	274.406	1	1	53.8203	31.08
DATA	2207	26	82	0	0	A_64_P056816	NM_001100697	11958.5	375.973	9.874827e+001	1.051736e+001	141	28	6.023313e+000	0	0	0	0	0	0	80.1506	1	1	48.5334	27.9697
DATA	2208	26	83	0	0	A_42_P580733	NM_001006981	11983.6	376	6.418984e+003	6.419087e+002	5069	31	9.659113e+000	0	0	0	0	0	0	5185.86	1	1	49.1849	32.5385
DATA	2209	26	84	66	1	DarkCorner	DarkCorner	12009.2	375.667	3.668310e+000	3.654033e+000	56	28	6.294732e+000	0	0	0	0	0	0	-7.17657	0	0	46.8651	29.0968
DATA	2210	26	85	66	1	DarkCorner	DarkCorner	12034.5	376	3.684654e+000	3.670313e+000	61	28	7.622040e+000	0	0	0	0	0	0	-2.42549	0	0	54.1152	28.1573
DATA	2211	27	1	66	1	DarkCorner	DarkCorner	9888.6	381.64	3.162873e+000	3.150562e+000	59	24	6.812666e+000	0	0	0	0	0	0	-1.66537	0	0	49.1849	24.9896
DATA	2212	27	2	66	1	DarkCorner	DarkCorner	9914.42	381.573	3.145992e+000	3.133748e+000	55.5	29	7.928831e+000	0	0	0	0	0	0	-3.00594	0	0	57.5363	28.4595
DATA	2213	27	3	0	0	A_44_P289922	NM_139103	9939.29	382.167	3.256936e+002	3.271827e+001	356	30	6.338147e+000	0	0	0	0	0	0	306.894	1	1	45.835	29.2083
DATA	2214	27	4	0	0	A_64_P117149	ENSRNOT00000065538	9965.42	381.573	3.115034e+000	3.102910e+000	61	29	6.136967e+000	0	0	0	0	0	0	-0.327596	0	0	65	29.0645
DATA	2215	27	5	0	0	A_42_P524308	NM_019213	9990.5	382.111	9.396008e+002	9.401083e+001	950.5	30	6.976867e+000	0	0	0	0	0	0	893.78	1	1	47.8731	29.48
DATA	2216	27	6	0	0	A_64_P037562	XM_001070892	10015.8	381.897	4.972224e+002	4.981725e+001	535	31.5	6.659623e+000	0	0	0	0	0	0	475.017	1	1	46.5243	31.8333
DATA	2217	27	7	0	0	A_44_P267706	XR_085883	10041.5	382	4.857280e+000	3.100834e+000	64	27	7.006449e+000	0	0	0	0	0	0	4.65979	1	0	54.1152	28.0968
DATA	2218	27	8	0	0	A_64_P082569	XM_001053354	10066.9	382.029	3.062562e+000	3.057559e+000	63	31	6.696302e+000	0	0	0	0	0	0	1.97966	0	0	46.8651	30.9259
DATA	2219	27	9	0	0	A_64_P000539	NM_053930	10091.8	382	1.602850e+004	1.602853e+003	15141	31	4.117327e+000	0	0	0	0	0	0	15492.3	1	1	51.4001	30
DATA	2220	27	10	0	0	A_43_P22124	NM_213625	10117.3	382.1	1.024621e+003	1.025068e+002	1025	28.5	6.525689e+000	0	0	0	0	0	0	993.799	1	1	47.2035	27.2308
DATA	2221	27	11	0	0	A_44_P1012556	NM_001013988	10142.7	381.985	1.061071e+002	1.103197e+001	164	29.5	5.812207e+000	0	0	0	0	0	0	103.246	1	1	46.1809	27.8214
DATA	2222	27	12	0	0	A_64_P115457	NM_001106361	10168.1	381.939	1.362416e+002	1.395279e+001	195	28	4.646504e+000	0	0	0	0	0	0	132.966	1	1	46.5243	28.44
DATA	2223	27	13	0	0	A_64_P064229	A_64_P064229	10193.5	382	2.405226e+001	3.846736e+000	82	30.5	6.327849e+000	0	0	0	0	0	0	23.5394	1	1	54.1152	30.7083
DATA	2224	27	14	0	0	A_64_P039066	ENSRNOT00000041345	10219	382	6.891059e+001	7.513504e+000	125	30	7.261918e+000	0	0	0	0	0	0	67.615	1	1	54.9904	29.9286
DATA	2225	27	15	0	0	A_42_P574960	ENSRNOT00000068719	10244.3	382.187	7.170021e+002	7.176241e+001	752	29	9.538770e+000	0	0	0	0	0	0	705.179	1	1	48.5334	29.4783
DATA	2226	27	16	0	0	A_42_P600215	NM_175844	10269.5	382.154	4.271784e+001	5.209078e+000	101.5	27	7.157185e+000	0	0	0	0	0	0	42.1022	1	1	45.1352	26.9565
DATA	2227	27	17	0	0	A_42_P607770	NM_001134616	10294.8	381.897	9.643433e+003	9.643479e+002	9251	29	8.008060e+000	0	0	0	0	0	0	9522.36	1	1	46.5243	30.9355
DATA	2228	27	18	0	0	A_64_P003348	NM_001077660	10320.3	382.1	6.069576e+002	6.076839e+001	658	30	1.065271e+001	0	0	0	0	0	0	600.376	1	1	47.2035	31.1379
DATA	2229	27	19	0	0	A_64_P057828	A_64_P057828	10345.7	381.894	1.099920e+003	1.100320e+002	1155	28.5	7.109406e+000	0	0	0	0	0	0	1089.59	1	1	45.835	27.3929
DATA	2230	27	20	0	0	A_64_P081765	NM_134355	10371.5	382	3.555204e+001	4.627402e+000	97	24.5	7.992885e+000	0	0	0	0	0	0	35.2646	1	1	54.1152	27.1
DATA	2231	27	21	0	0	A_42_P758886	NM_019258	10396.4	382.149	3.083061e+002	3.097226e+001	363	33	8.141867e+000	0	0	0	0	0	0	306.141	1	1	46.1809	32.04
DATA	2232	27	22	0	0	A_42_P745470	XM_001066818	10421.9	382.211	9.104793e+003	9.104841e+002	8735	28.5	7.413605e+000	0	0	0	0	0	0	9048.85	1	1	47.2035	29.25
DATA	2233	27	23	0	0	A_42_P800949	NM_031787	10447.3	382.071	2.750500e+002	2.766320e+001	330	29.5	7.057867e+000	0	0	0	0	0	0	273.54	1	1	46.5243	31.4643
DATA	2234	27	24	0	0	A_42_P738559	NM_012801	10472.7	382.343	1.465255e+004	1.465258e+003	14150.5	31	4.783259e+000	0	0	0	0	0	0	14579.4	1	1	46.8651	31.7097
DATA	2235	27	25	0	0	A_42_P749550	NM_001109359	10498.1	381.976	4.221133e+003	4.221237e+002	4157	29	7.929664e+000	0	0	0	0	0	0	4201.04	1	1	50.7771	31.2903
DATA	2236	27	26	0	0	A_64_P007493	ENSRNOT00000006658	10523.6	382.427	1.837405e+001	3.476870e+000	81	28	9.215146e+000	0	0	0	0	0	0	18.289	1	1	57.5363	29.5676
DATA	2237	27	27	0	0	A_64_P056182	NM_053363	10548.8	382.194	3.314859e+003	3.314990e+002	3268	25	7.117764e+000	0	0	0	0	0	0	3299.05	1	1	47.5395	26.3448
DATA	2238	27	28	0	0	A_42_P818546	NM_001191600	10574.4	381.899	5.270263e+002	5.278530e+001	581	26.5	7.678942e+000	0	0	0	0	0	0	524.335	1	1	47.5395	28.6154
DATA	2239	27	29	0	0	A_44_P407948	XM_001055260	10599.5	382.368	2.399214e+001	3.805874e+000	84	30	7.578078e+000	0	0	0	0	0	0	23.8593	1	1	49.8279	27.9333
DATA	2240	27	30	66	-1	(-)3xSLv1	NegativeControl	10625.4	382.427	2.967966e+000	2.956414e+000	52	29	9.091080e+000	0	0	0	0	0	0	-9.78021	0	0	65	28.9091
DATA	2241	27	31	0	0	A_64_P044505	NM_031587	10650.8	382.61	2.775269e+002	2.790998e+001	324	28	8.063042e+000	0	0	0	0	0	0	275.571	1	1	49.8279	28.4333
DATA	2242	27	32	0	0	A_42_P685138	NM_153621	10676.4	382.427	4.678076e+002	4.687444e+001	514	33.5	7.235055e+000	0	0	0	0	0	0	464.013	1	1	57.5363	33.4583
DATA	2243	27	33	0	0	A_64_P121747	ENSRNOT00000050332	10701	382.083	4.334754e+000	2.997174e+000	68	30	7.288229e+000	0	0	0	0	0	0	4.29438	1	0	46.8651	29.5806
DATA	2244	27	34	0	0	A_42_P791436	NM_012750	10726.7	382.324	1.320133e+003	1.320467e+002	1349.5	26.5	6.787074e+000	0	0	0	0	0	0	1306.04	1	1	48.2044	27.7333
DATA	2245	27	35	0	0	A_44_P349309	NM_001100890	10752.2	382.417	3.239156e+002	3.252784e+001	378.5	28.5	8.224103e+000	0	0	0	0	0	0	319.96	1	1	47.8731	30.625
DATA	2246	27	36	0	0	A_42_P502621	NM_024401	10777.3	382.361	1.088120e+002	1.128173e+001	168	27	4.690416e+000	0	0	0	0	0	0	107.3	1	1	48.2044	27
DATA	2247	27	37	0	0	A_43_P21574	NM_001012043	10802.8	382.606	6.486797e+001	7.140641e+000	126	30	7.176491e+000	0	0	0	0	0	0	63.8474	1	1	47.5395	28.1538
DATA	2248	27	38	0	0	A_44_P496331	NM_001001085	10828.1	382.651	6.136282e+001	6.826464e+000	123	31	5.986728e+000	0	0	0	0	0	0	60.2743	1	1	44.7812	30.1818
DATA	2249	27	39	0	0	A_64_P016503	ENSRNOT00000003659	10853.9	382.5	8.935299e+001	9.424789e+000	153	27.5	7.648078e+000	0	0	0	0	0	0	87.5703	1	1	65	29.3
DATA	2250	27	40	0	0	A_43_P13270	NM_134415	10878.8	382.553	1.776911e+004	1.776913e+003	17415	30.5	7.460254e+000	0	0	0	0	0	0	17374.6	1	1	49.5074	29.8636
DATA	2251	27	41	0	0	A_42_P553960	NM_001107831	10904.6	382.405	8.587335e+003	8.587388e+002	8264.5	29	8.822724e+000	0	0	0	0	0	0	8375.12	1	1	52.0157	31.0741
DATA	2252	27	42	0	0	A_44_P428997	NM_001107661	10929.4	382.587	3.282702e+002	3.296567e+001	377	28	1.057996e+001	0	0	0	0	0	0	319.334	1	1	49.5074	31.5
DATA	2253	27	43	0	0	A_42_P619926	NM_001106578	10955.5	382.5	8.436896e+001	8.964148e+000	140	31	6.538888e+000	0	0	0	0	0	0	81.8358	1	1	57.5363	29.7813
DATA	2255	27	45	0	0	A_44_P524471	NM_001106408	11006.2	382.618	9.760572e+002	9.765327e+001	1008	30	9.106918e+000	0	0	0	0	0	0	941.098	1	1	46.5243	31.3103
DATA	2256	27	46	0	0	A_43_P10009	XM_347035	11031.6	382.608	5.782079e+003	5.782159e+002	5550	31	8.862354e+000	0	0	0	0	0	0	5557.15	1	1	49.1849	31.1852
DATA	2257	27	47	0	0	A_64_P068112	A_64_P068112	11056.9	382.767	8.396842e+003	8.396898e+002	8439.5	31.5	1.135480e+001	0	0	0	0	0	0	8043.61	1	1	44.4243	33.8125
DATA	2258	27	48	0	0	A_44_P191715	NM_021666	11082.7	382.139	3.090181e+000	3.078154e+000	56	27	6.326336e+000	0	0	0	0	0	0	-5.1862	0	0	49.8279	28.7568
DATA	2259	27	49	0	0	A_64_P035769	NM_001108962	11107.6	382.373	1.730958e+003	1.731233e+002	1707	32	6.517396e+000	0	0	0	0	0	0	1646.43	1	1	45.835	31.7083
DATA	2260	27	50	0	0	A_64_P158469	XM_579990	11133.3	382.493	9.416686e+000	3.240233e+000	71	33	8.516913e+000	0	0	0	0	0	0	8.9236	1	0	49.1849	32.8571
DATA	2261	27	51	0	0	A_43_P12811	NM_053464	11158.3	382.592	2.068232e+003	2.068466e+002	2005	29	7.500000e+000	0	0	0	0	0	0	1952.65	1	1	47.8731	30.4
DATA	2262	27	52	0	0	A_44_P370694	NM_001107961	11184	382.545	1.332515e+001	3.396628e+000	75	30	7.773898e+000	0	0	0	0	0	0	12.5306	1	0	55.8519	31.1724
DATA	2263	27	53	0	0	A_42_P749550	NM_001109359	11209	382.722	4.150553e+003	4.150671e+002	3877	29.5	6.217236e+000	0	0	0	0	0	0	3887.77	1	1	47.8731	30.6333
DATA	2264	27	54	0	0	A_64_P125893	ENSRNOT00000021391	11234.7	382.662	1.688401e+004	1.688404e+003	15325.5	33	7.466340e+000	0	0	0	0	0	0	15749.2	1	1	48.5334	32.2903
DATA	2265	27	55	0	0	A_44_P1000653	NM_031531	11260.4	382.573	1.263842e+002	1.302827e+001	183.5	31	6.231748e+000	0	0	0	0	0	0	117.387	1	1	57.5363	31.4375
DATA	2266	27	56	0	0	A_64_P035992	A_64_P035992	11285.9	383.188	3.892760e+002	3.905699e+001	418	31	4.987942e+000	0	0	0	0	0	0	360.047	1	1	45.4864	31.7097
DATA	2267	27	57	0	0	A_42_P592385	NM_022935	11311	382.545	3.834542e+000	3.213669e+000	67	29	6.673008e+000	0	0	0	0	0	0	3.53088	1	0	55.8519	30.0645
DATA	2268	27	58	0	0	A_64_P065624	ENSRNOT00000039260	11336.4	382.836	1.431096e+001	3.509841e+000	75	31	7.161567e+000	0	0	0	0	0	0	13.1196	1	0	48.5334	31.375
DATA	2269	27	59	0	1	ERCC-00097_63	ERCC-00097_63	11361.8	382.594	3.518391e+001	4.769095e+000	98	30	5.088751e+000	0	0	0	0	0	0	32.108	1	1	46.8651	31.8462
DATA	2270	27	60	0	0	A_42_P477625	NM_001108719	11386.7	382.753	4.733968e+003	4.734079e+002	4189.5	33	7.846276e+000	0	0	0	0	0	0	4300.75	1	1	48.2044	32.7241
DATA	2271	27	61	0	0	A_42_P788030	NM_031618	11412.6	382.973	2.638955e+004	2.638957e+003	23591	32	7.324198e+000	0	0	0	0	0	0	23861.3	1	1	49.1849	31.5185
DATA	2272	27	62	0	0	A_44_P278247	XM_219377	11437.5	383	7.660918e+003	7.660987e+002	6569.5	32	4.994869e+000	0	0	0	0	0	0	6894.99	1	1	48.5334	32.8889
DATA	2273	27	63	0	0	A_44_P189262	NM_024000	11463.1	382.823	2.018213e+004	2.018216e+003	17885	33.5	1.062723e+001	0	0	0	0	0	0	18076.2	1	1	50.4627	36.6
DATA	2274	27	64	0	0	A_44_P212850	NM_019305	11488.6	382.573	5.357267e+001	6.290210e+000	107	36	1.017154e+001	0	0	0	0	0	0	47.7482	1	1	57.5363	36.9091
DATA	2275	27	65	0	0	A_64_P144278	NM_001106525	11513.5	382.589	1.304637e+004	1.304641e+003	11700	27.5	7.803330e+000	0	0	0	0	0	0	11572.4	1	1	48.5334	30.2667
DATA	2276	27	66	0	0	A_44_P683816	NM_001127488	11539.2	382.785	2.126899e+002	2.152788e+001	253	28	7.401680e+000	0	0	0	0	0	0	187.733	1	1	45.835	28.4571
DATA	2277	27	67	0	0	A_64_P048712	A_64_P048712	11564.9	383.015	7.323420e+001	8.051278e+000	126.5	30	6.178981e+000	0	0	0	0	0	0	64.3198	1	1	46.8651	29.4138
DATA	2278	27	68	0	0	A_64_P012813	NM_001106456	11590.1	382.986	1.088145e+001	3.533509e+000	71	30	9.754370e+000	0	0	0	0	0	0	9.50985	1	0	46.8651	30.0909
DATA	2280	27	70	0	0	A_42_P598602	NM_001077646	11641.1	382.935	2.610355e+001	4.283219e+000	86	31.5	6.698504e+000	0	0	0	0	0	0	22.5842	1	1	54.4085	31.0313
DATA	2281	27	71	0	0	A_44_P375380	NM_001191572	11666.5	382.873	1.816910e+002	1.848690e+001	213	27	6.791985e+000	0	0	0	0	0	0	156.403	1	1	47.8731	27.8519
DATA	2282	27	72	0	0	A_64_P113555	NM_001000025	11691.9	382.935	1.110167e+001	3.605463e+000	72	31	5.975907e+000	0	0	0	0	0	0	9.50857	1	0	54.4085	31.5652
DATA	2283	27	73	0	0	A_42_P590466	NM_001009676	11717.1	383	3.418442e+003	3.418616e+002	2905	30.5	8.552241e+000	0	0	0	0	0	0	2913.33	1	1	46.8651	31.3158
DATA	2284	27	74	0	0	A_44_P224987	XM_001058317	11742.4	382.926	5.082645e+001	6.151301e+000	104	37	8.662245e+000	0	0	0	0	0	0	43.0985	1	1	46.5243	36.9655
DATA	2285	27	75	0	0	A_42_P557315	NM_001106280	11767.9	383.1	5.186490e+003	5.186607e+002	4364.5	34	7.629315e+000	0	0	0	1	0	0	4376.01	1	1	46.8651	33.1613
DATA	2286	27	76	0	0	A_44_P375364	A_44_P375364	11793.5	383	6.544888e+001	7.421928e+000	117	33	8.583260e+000	0	0	0	0	0	0	54.9416	1	1	54.1152	33.1212
DATA	2287	27	77	0	0	A_44_P880152	NM_031553	11818.6	383.028	1.384559e+002	1.428533e+001	179	34.5	9.945776e+000	0	0	0	0	0	0	115.659	1	1	48.2044	34.9615
DATA	2288	27	78	0	0	A_64_P057575	NM_001191967	11843	383.868	1.659999e+002	1.697183e+001	208.5	26	7.479062e+000	0	0	0	0	0	0	138.039	1	1	40.2912	26.8
DATA	2289	27	79	0	0	A_64_P122183	ENSRNOT00000009823	11869.5	383.394	5.040416e+001	6.166137e+000	103	24	5.913998e+000	0	0	0	0	0	0	41.6939	1	1	45.4864	24.7586
DATA	2290	27	80	0	0	A_64_P057587	NM_019313	11894.8	383.155	8.088786e+001	8.841295e+000	128	28	7.828047e+000	0	0	0	0	0	0	66.5818	1	1	46.8651	28.7241
DATA	2291	27	81	0	0	A_42_P480769	XM_001081609	11920.3	383.014	4.308752e+002	4.323656e+001	408	33.5	7.274582e+000	0	0	0	0	0	0	352.942	1	1	47.2035	33.6667
DATA	2292	27	82	0	0	A_42_P623151	NM_031026	11945.4	382.973	1.910329e+004	1.910333e+003	14924	29	6.080271e+000	0	0	0	0	0	0	15574.2	1	1	48.5334	29.2727
DATA	2293	27	83	0	0	A_42_P550241	NM_022954	11971.5	383	1.332298e+001	3.858538e+000	71	28.5	8.042546e+000	0	0	0	0	0	0	10.8094	1	0	54.1152	30.3571
DATA	2294	27	84	66	1	DarkCorner	DarkCorner	11996.8	382.797	3.652432e+000	3.638217e+000	55	29	7.282986e+000	0	0	0	0	0	0	-6.54689	0	0	47.8731	30.5588
DATA	2295	27	85	66	1	DarkCorner	DarkCorner	12021.9	383.052	3.668689e+000	3.654410e+000	54	25	6.964692e+000	0	0	0	0	0	0	-7.88764	0	0	47.8731	27.4043
DATA	2296	28	1	66	1	DarkCorner	DarkCorner	9901.25	389.68	3.150348e+000	3.138087e+000	55	29	7.545213e+000	0	0	0	0	0	0	-3.88823	0	0	49.1849	27.6731
DATA	2297	28	2	0	0	A_42_P802550	NM_017365	9927	389.455	3.035398e+002	3.051411e+001	344	26	7.031897e+000	0	0	0	0	0	0	285.66	1	1	65	25.6875
DATA	2299	28	4	0	0	A_42_P619926	NM_001106578	9977.58	389.427	9.214496e+001	9.719552e+000	147.5	29	5.421562e+000	0	0	0	0	0	0	87.5462	1	1	57.5363	28.68
DATA	2300	28	5	0	0	A_64_P052441	ENSRNOT00000004876	10003.1	389.556	4.386756e+001	5.359210e+000	98.5	32.5	6.260990e+000	0	0	0	0	0	0	41.8653	1	1	50.4627	32.2
DATA	2301	28	6	0	0	A_64_P056823	CA510211	10028.4	389.329	8.567227e+000	3.183221e+000	69	31	6.970839e+000	0	0	0	0	0	0	8.21029	1	0	50.7771	29
DATA	2302	28	7	0	0	A_42_P669870	NM_001011919	10053.9	389.456	3.451504e+003	3.451639e+002	3319.5	30.5	6.932576e+000	0	0	0	0	0	0	3321.04	1	1	50.4627	30
DATA	2303	28	8	0	0	A_42_P683634	NM_012946	10079.4	389.427	5.038698e+004	5.038699e+003	48142	31	6.129876e+000	0	0	0	0	0	0	48665.4	1	1	57.5363	30.8462
DATA	2304	28	9	0	0	A_42_P542809	NM_021671	10104.5	389.265	5.574907e+002	5.583143e+001	581.5	30	5.751783e+000	0	0	0	0	0	0	540.314	1	1	46.5243	28.087
DATA	2305	28	10	0	0	A_64_P065887	ENSRNOT00000024693	10130.1	389.304	1.597585e+002	1.625903e+001	210	29	7.452935e+000	0	0	0	0	0	0	155.354	1	1	46.1809	28.7097
DATA	2306	28	11	0	0	A_64_P043406	NM_001024902	10155.3	389.23	1.231736e+003	1.232104e+002	1198	27	6.923872e+000	0	0	0	0	0	0	1201.46	1	1	48.8603	26.5
DATA	2307	28	12	0	0	A_64_P060769	NM_001191090	10181	388.774	1.477745e+003	1.478051e+002	1529	31	8.785974e+000	0	0	0	0	0	0	1445.53	1	1	45.4864	31.88
DATA	2308	28	13	0	0	A_64_P150789	A_64_P150789	10206.2	389.351	1.360584e+001	3.289922e+000	73	28	4.691223e+000	0	0	0	0	0	0	13.3453	1	0	48.8603	28.4848
DATA	2309	28	14	0	0	A_64_P110254	NM_022404	10231.6	389.534	8.756999e+003	8.757050e+002	8612.5	30.5	6.804523e+000	0	0	0	0	0	0	8610.42	1	1	49.1849	28.6923
DATA	2310	28	15	0	0	A_42_P700753	FQ212883	10256.8	389.74	2.248625e+003	2.248823e+002	2214.5	27	8.376014e+000	0	0	0	0	0	0	2215.93	1	1	48.5334	27.375
DATA	2311	28	16	0	0	A_42_P503768	NM_001009466	10282.4	389.878	3.493886e+002	3.506531e+001	397	29.5	6.694289e+000	0	0	0	0	0	0	345.012	1	1	48.5334	29.3438
DATA	2312	28	17	0	0	A_64_P106021	ENSRNOT00000017892	10307.9	389.5	7.869862e+001	8.411667e+000	135	30	8.204889e+000	0	0	0	0	0	0	77.8494	1	1	56.9804	32.0345
DATA	2313	28	18	0	0	A_43_P10861	NM_001024879	10333.4	389.474	2.807574e+002	2.823191e+001	335	29.5	5.633588e+000	0	0	0	0	0	0	278.169	1	1	49.8279	29.4583
DATA	2314	28	19	0	0	A_44_P562251	BF545174	10358.3	389.583	8.917989e+001	9.396807e+000	150.5	24.5	7.289044e+000	0	0	0	0	0	0	88.4786	1	1	48.5334	27.1111
DATA	2315	28	20	0	0	A_42_P608768	ENSRNOT00000009898	10384.1	389.5	1.660130e+002	1.686274e+001	228	26.5	8.445906e+000	0	0	0	0	0	0	164.902	1	1	47.8731	29
DATA	2316	28	21	0	0	A_64_P117115	NM_001109329	10409.5	389.5	1.436076e+001	3.285451e+000	77	28	7.917305e+000	0	0	0	0	0	0	14.2785	1	0	57.5363	29.3939
DATA	2317	28	22	0	0	A_64_P043331	ENSRNOT00000032411	10434.9	389.5	1.480109e+002	1.509274e+001	208	29.5	8.228813e+000	0	0	0	0	0	0	147.275	1	1	56.9804	29.4474
DATA	2318	28	23	0	0	A_42_P664274	NM_001079705	10460.4	389.6	1.268405e+003	1.268749e+002	1295.5	30.5	5.387939e+000	0	0	0	0	0	0	1262.83	1	1	49.5074	31.7333
DATA	2319	28	24	0	0	A_64_P044593	NM_001173451	10485.4	389.681	5.510956e+002	5.518846e+001	603.5	30	6.466028e+000	0	0	0	0	0	0	548.878	1	1	48.5334	30.5714
DATA	2320	28	25	0	0	A_64_P006978	NM_001109371	10511.1	389.5	3.689916e+001	4.723848e+000	98	26.5	8.396131e+000	0	0	0	0	0	0	36.7564	1	1	56.9804	28.2105
DATA	2321	28	26	0	0	A_64_P119390	NM_001109519	10536.5	389.493	1.380433e+001	3.256566e+000	73.5	23	5.758472e+000	0	0	0	0	0	0	13.7506	1	0	49.1849	25.08
DATA	2322	28	27	0	0	A_64_P034714	A_64_P034714	10561.7	389.706	1.732242e+001	3.421039e+000	79	25	6.699446e+000	0	0	0	0	0	0	17.2518	1	1	46.5243	26.8485
DATA	2323	28	28	0	0	A_44_P535959	NM_001107650	10586.8	389.727	3.388236e+002	3.401064e+001	397.5	28.5	8.141639e+000	0	0	0	0	0	0	337.312	1	1	45.835	28.8125
DATA	2324	28	29	0	0	A_64_P286274	ENSRNOT00000055318	10612.4	390.129	1.715334e+002	1.740563e+001	229	24	7.931959e+000	0	0	0	0	0	0	170.676	1	1	46.8651	26.7143
DATA	2325	28	30	0	0	A_44_P333384	NM_001024788	10637.9	390.186	1.868655e+001	3.496306e+000	77	29	9.396074e+000	0	0	0	0	0	0	18.579	1	1	46.8651	30.7
DATA	2326	28	31	0	0	A_42_P522194	NM_012914	10663.3	389.896	1.256347e+002	1.290698e+001	187	28	4.982828e+000	0	0	0	0	0	0	124.79	1	1	49.8279	29.8571
DATA	2327	28	32	0	0	A_44_P273859	NM_017021	10688.6	389.573	4.267853e+000	2.991931e+000	62	30	8.028411e+000	0	0	0	0	0	0	4.23428	1	0	57.5363	31.8462
DATA	2328	28	33	0	0	A_43_P11665	NM_013024	10714.3	389.765	6.253180e+001	6.920580e+000	124	30	6.690147e+000	0	0	0	0	0	0	61.9598	1	1	46.5243	28.875
DATA	2329	28	34	0	0	A_64_P118273	NM_001170593	10739.6	389.573	5.805115e+001	6.520550e+000	120	29	7.326244e+000	0	0	0	0	0	0	57.4352	1	1	57.5363	29.0769
DATA	2330	28	35	0	0	A_42_P762814	NM_031318	10764.5	389.836	3.310314e+003	3.310447e+002	3163	29	4.643480e+000	0	0	0	0	0	0	3270.06	1	1	47.8731	29.1905
DATA	2331	28	36	0	0	A_44_P384017	NM_031688	10790	390.226	4.397524e+002	4.407606e+001	494	30	6.329868e+000	0	0	0	0	0	0	433.641	1	1	45.4864	29.8571
DATA	2332	28	37	0	0	A_64_P118872	A_64_P118872	10815.9	389.855	7.981311e+000	3.090368e+000	70	30	6.749167e+000	0	0	0	0	0	0	7.85436	1	0	46.8651	29.4857
DATA	2333	28	38	0	0	A_42_P599210	NM_001008326	10840.6	390.043	1.090493e+003	1.090903e+002	1166	28	6.598064e+000	0	0	0	0	0	0	1070.96	1	1	46.8651	28.3714
DATA	2334	28	39	0	0	A_44_P305801	NM_001033894	10866.1	389.896	3.223914e+003	3.224054e+002	3190	31	7.536402e+000	0	0	0	0	0	0	3158.93	1	1	46.8651	30.1212
DATA	2335	28	40	0	0	A_64_P085462	A_64_P085462	10892	390	4.241861e+004	4.241862e+003	41971.5	32	7.678197e+000	0	0	0	0	0	0	41461.6	1	1	54.9904	33.1429
DATA	2336	28	41	0	0	A_42_P488000	NM_001108479	10917.5	390	1.022877e+003	1.023321e+002	1055	27.5	8.096884e+000	0	0	0	1	0	0	997.224	1	1	54.1152	29.3214
DATA	2337	28	42	0	0	A_42_P818546	NM_001191600	10942.7	389.827	4.377927e+002	4.388343e+001	493	29	8.522128e+000	0	0	0	0	0	0	425.656	1	1	49.8279	30.72
DATA	2338	28	43	0	0	A_44_P488489	TC610872	10967.8	389.897	1.307072e+003	1.307423e+002	1287	26	7.689671e+000	0	0	0	0	0	0	1267.26	1	1	46.5243	27.8
DATA	2339	28	44	0	0	A_64_P153971	A_64_P153971	10993.5	389.971	6.114044e+000	3.100359e+000	67	28	8.591555e+000	0	0	0	0	0	0	5.91	1	0	47.2035	30.7407
DATA	2340	28	45	0	0	A_64_P077985	NM_001170478	11019	390	4.427393e+001	5.375710e+000	104	29	7.929788e+000	0	0	0	0	0	0	42.6626	1	1	65	30.1923
DATA	2341	28	46	0	0	A_44_P576822	NM_080771	11043.5	390.043	8.837559e+002	8.842850e+001	897.5	29	9.184869e+000	0	0	0	0	0	0	848.93	1	1	47.8731	29.8519
DATA	2342	28	47	0	0	A_64_P134310	A_64_P134310	11069.5	390	7.002908e+001	7.645948e+000	127	27.5	9.235530e+000	0	0	0	0	0	0	67.037	1	1	54.1152	30.0882
DATA	2343	28	48	0	0	A_64_P134706	NM_001107533	11095.1	390.347	1.243006e+001	3.321216e+000	73.5	31.5	7.709078e+000	0	0	0	0	0	0	11.8578	1	0	47.5395	31.4667
DATA	2344	28	49	0	0	A_42_P469751	XM_001054007	11120	389.797	2.510369e+002	2.529328e+001	300.5	31	7.212268e+000	0	0	0	0	0	0	238.611	1	1	46.8651	31.5714
DATA	2345	28	50	0	0	A_64_P082653	ENSRNOT00000020906	11146	390	8.552682e+001	9.098106e+000	143	33	7.173182e+000	0	0	0	0	0	0	80.9862	1	1	54.9904	32
DATA	2346	28	51	0	0	A_43_P18902	NM_001109221	11171.3	390	1.365456e+002	1.400529e+001	190	29	8.687420e+000	0	0	0	0	0	0	128.803	1	1	48.5334	31.6667
DATA	2347	28	52	0	0	A_64_P086719	ENSRNOT00000065918	11196.3	389.725	1.407132e+001	3.428917e+000	74.5	28.5	5.390162e+000	0	0	0	0	0	0	13.2215	1	0	46.8651	29.4231
DATA	2348	28	53	0	0	A_64_P138585	TC587165	11221.7	390.093	3.449593e+003	3.449736e+002	3066.5	32	7.301671e+000	0	0	0	0	0	0	3228.36	1	1	48.8603	32.2424
DATA	2349	28	54	0	0	A_64_P230444	ENSRNOT00000010282	11247.5	390.265	3.961966e+003	3.962092e+002	3649.5	31	5.748828e+000	0	0	0	0	0	0	3692.44	1	1	46.5243	31.2647
DATA	2350	28	55	0	0	A_64_P124427	TC642834	11272.9	390.065	8.289392e+001	8.873406e+000	140	31	6.257576e+000	0	0	0	0	0	0	76.9262	1	1	54.4085	30.5625
DATA	2351	28	56	0	0	A_42_P778587	NM_001135767	11298.1	390	2.020026e+002	2.044897e+001	246	29	6.094230e+000	0	0	0	0	0	0	186.658	1	1	46.8651	30.1622
DATA	2352	28	57	0	0	A_42_P526030	NM_057197	11323.4	390	5.757908e+003	5.757996e+002	5210	29	5.183411e+000	0	0	0	0	0	0	5297.29	1	1	48.5334	28.7917
DATA	2353	28	58	0	0	A_64_P022561	XM_001070923	11349.1	390.065	8.441544e+001	9.030545e+000	137	32.5	5.783930e+000	0	0	0	0	0	0	77.3124	1	1	54.4085	32.5769
DATA	2354	28	59	0	0	A_64_P126226	NM_001105901	11374.5	390.352	1.886204e+002	1.913532e+001	237	35	9.573990e+000	0	0	0	0	0	0	171.974	1	1	65	35.625
DATA	2355	28	60	0	0	A_64_P089541	NM_001106214	11399.6	390.404	1.512171e+002	1.546432e+001	205	29.5	7.362924e+000	0	0	0	0	0	0	137.246	1	1	57.8122	30.1667
DATA	2356	28	61	0	0	A_44_P205869	NM_138891	11424.9	390	7.495059e+002	7.502113e+001	717	29	9.689775e+000	0	0	0	0	0	0	677.048	1	1	46.8651	31.7407
DATA	2357	28	62	0	0	A_44_P491796	NM_012881	11450.6	390.427	3.349174e+001	4.679251e+000	92.5	31	5.563782e+000	0	0	0	0	0	0	30.1121	1	1	57.5363	31.2069
DATA	2358	28	63	0	0	A_64_P132706	NM_001008304	11476	390.455	6.349729e+004	6.349730e+003	54369.5	35.5	1.187429e+001	0	0	0	0	0	0	56817.6	1	1	55.8519	38.3667
DATA	2359	28	64	0	0	A_64_P040715	NM_001011979	11501.4	390.28	1.149926e+003	1.150399e+002	1089	35	9.489251e+000	0	0	0	0	0	0	1023.96	1	1	48.8603	34.4872
DATA	2360	28	65	0	0	A_44_P191055	NM_001107693	11526.3	390.338	3.304269e+003	3.304435e+002	2896	29	9.206846e+000	0	0	0	0	0	0	2928.34	1	1	48.5334	31.1379
DATA	2361	28	66	0	0	A_64_P077493	XR_005942	11552.4	390.4	1.296640e+001	3.575315e+000	73	29	5.078311e+000	0	0	0	0	0	0	11.4336	1	0	49.1849	28.5484
DATA	2362	28	67	0	0	A_44_P317600	NM_012612	11577.1	390.232	7.035881e+002	7.043843e+001	658.5	28	7.482869e+000	0	0	0	0	0	0	617.424	1	1	46.5243	28.08
DATA	2363	28	68	0	0	A_42_P751368	NM_001047874	11602.7	390.288	1.901357e+003	1.901655e+002	1683	27	7.340723e+000	0	0	0	0	0	0	1660.18	1	1	48.2044	26.9
DATA	2364	28	69	0	0	A_42_P711568	NM_001107584	11627.8	390.301	8.787234e+003	8.787299e+002	7565	31	7.391510e+000	0	0	0	0	0	0	7635	1	1	48.2044	31.5263
DATA	2365	28	70	0	0	A_64_P091817	A_64_P091817	11653.7	390.645	1.241639e+003	1.242104e+002	1141.5	29	5.709842e+000	0	0	0	0	0	0	1073.43	1	1	49.5074	29.1333
DATA	2366	28	71	0	0	A_64_P006628	NM_172328	11678.9	390.557	7.248150e+001	8.012554e+000	124	29	7.335288e+000	0	0	0	0	0	0	62.3499	1	1	47.8731	28.8387
DATA	2367	28	72	0	0	A_64_P057760	NM_001191643	11704.6	390.427	2.547447e+002	2.570473e+001	279	30	5.342596e+000	0	0	0	0	0	0	218.024	1	1	57.5363	30.28
DATA	2368	28	73	0	0	A_44_P150013	NM_001134495	11730	390.455	3.463577e+000	3.450097e+000	61	31	1.022058e+001	0	0	0	0	0	0	-1.46626	0	0	55.8519	33.3571
DATA	2369	28	74	0	0	A_44_P526975	NM_001002822	11755	390.314	2.653873e+002	2.676426e+001	288	34	9.845492e+000	0	0	0	0	0	0	224.883	1	1	46.5243	34.3939
DATA	2370	28	75	66	-1	(-)3xSLv1	NegativeControl	11780.7	390.5	3.498183e+000	3.484568e+000	56.5	34	1.023057e+001	0	0	0	0	0	0	-6.46003	0	0	57.5363	32.2581
DATA	2371	28	76	0	0	A_42_P648937	NM_001191732	11805.6	390.222	1.091450e+003	1.092012e+002	956	33.5	7.861567e+000	0	0	0	0	0	0	915.727	1	1	47.8731	32.2143
DATA	2372	28	77	0	0	A_44_P533786	NM_053749	11831.5	390.5	1.540587e+001	3.841674e+000	77	32	9.965655e+000	0	0	0	0	0	0	12.8616	1	0	57.5363	33.2571
DATA	2373	28	78	0	0	A_64_P156165	S68987	11856.6	390.466	8.356388e+003	8.356463e+002	6808.5	27	8.303049e+000	0	0	0	0	0	0	6942.62	1	1	49.1849	27.8205
DATA	2374	28	79	0	0	A_64_P084293	NM_001000525	11882.2	390.563	2.093726e+001	4.124581e+000	76	29.5	7.567626e+000	0	0	0	0	0	0	17.3102	1	1	45.4864	30.2
DATA	2375	28	80	0	0	A_42_P708569	NM_001191837	11907.5	390.265	6.771890e+003	6.771985e+002	5464	34	8.001235e+000	0	0	0	0	0	0	5571.56	1	1	46.5243	34.2609
DATA	2376	28	81	0	0	A_64_P112215	NM_001110141	11933.3	390.5	2.753935e+002	2.777211e+001	291	33	7.370728e+000	0	0	0	0	0	0	225.499	1	1	57.5363	32.5926
DATA	2377	28	82	0	0	A_42_P567793	NM_001107668	11957.9	390.639	2.352654e+003	2.352930e+002	1873	29	6.739680e+000	0	0	0	0	0	0	1917.73	1	1	48.5334	28.6429
DATA	2378	28	83	0	0	A_42_P481087	XM_232226	11983.9	390.5	7.681269e+002	7.689802e+001	662.5	31	8.479929e+000	0	0	0	0	0	0	623.141	1	1	56.9804	33.5667
DATA	2379	28	84	66	1	DarkCorner	DarkCorner	12009.6	390.493	3.652605e+000	3.638388e+000	54	29	7.428980e+000	0	0	0	0	0	0	-7.8414	0	0	49.1849	28.7955
DATA	2380	28	85	66	1	DarkCorner	DarkCorner	12034.8	390.868	3.668522e+000	3.654244e+000	60	28	7.355068e+000	0	0	0	0	0	0	-2.43423	0	0	46.1809	28.6578
DATA	2381	29	1	66	1	DarkCorner	DarkCorner	9888.89	396.5	3.154946e+000	3.142667e+000	58	25	7.203468e+000	0	0	0	0	0	0	-2.54998	0	0	56.9804	25.1518
DATA	2382	29	2	66	1	DarkCorner	DarkCorner	9914.44	396.644	3.138395e+000	3.126180e+000	57	28	6.945131e+000	0	0	0	0	0	0	-3.18007	0	0	48.5334	27.1212
DATA	2383	29	3	0	0	A_64_P096512	NM_031782	9939.57	396.605	1.869950e+004	1.869953e+003	16829	31	7.727009e+000	0	0	0	0	0	0	17660.8	1	1	49.5074	29.96
DATA	2384	29	4	0	0	A_44_P172814	NM_173102	9964.88	396.488	2.903459e+004	2.903461e+003	26990	30	6.337192e+000	0	0	0	0	0	0	27551.4	1	1	50.4627	29.92
DATA	2385	29	5	0	0	A_42_P788040	NM_001025053	9990.01	396.97	8.501110e+001	9.042591e+000	140	29	5.759331e+000	0	0	0	0	0	0	81.0365	1	1	46.8651	29.3548
DATA	2386	29	6	0	0	A_42_P808945	NM_181368	10015.9	396.5	6.062554e+002	6.070317e+001	621	32	7.266079e+000	0	0	0	1	0	0	580.408	1	1	56.9804	30.8529
DATA	2387	29	7	0	0	A_64_P162713	A_64_P162713	10041.4	396.573	8.612570e+000	3.175348e+000	70	31	6.049181e+000	0	0	0	0	0	0	8.27927	1	0	65	30.1481
DATA	2388	29	8	0	0	A_44_P501204	NM_017361	10066.6	396.573	2.066584e+002	2.088892e+001	255	27	6.758209e+000	0	0	0	0	0	0	199.42	1	1	57.5363	28.5625
DATA	2389	29	9	0	0	A_42_P785926	NM_001108289	10092.1	396.5	1.097163e+003	1.097582e+002	1094	31	4.888884e+000	0	0	0	0	0	0	1062.58	1	1	56.9804	30.913
DATA	2390	29	10	0	0	A_42_P616287	NM_001134555	10117.4	396.577	2.041503e+002	2.063769e+001	257	30	6.641835e+000	0	0	0	0	0	0	198.389	1	1	47.8731	30.2258
DATA	2391	29	11	66	-1	(-)3xSLv1	NegativeControl	10142.9	396.5	3.025515e+000	3.013740e+000	52	27	6.020797e+000	0	0	0	0	0	0	-7.5379	0	0	65	27.8
DATA	2392	29	12	0	0	A_43_P12365	NM_023101	10168.4	396.573	2.844693e+001	4.137732e+000	85.5	30.5	8.316491e+000	0	0	0	0	0	0	27.8153	1	1	57.5363	29.1429
DATA	2393	29	13	0	0	A_64_P076643	ENSRNOT00000057620	10193.6	396.573	3.784840e+000	3.020402e+000	65.5	29	5.818724e+000	0	0	0	0	0	0	3.71088	1	0	57.5363	29.3704
DATA	2394	29	14	0	0	A_64_P074865	XR_008898	10219.1	396.5	5.679942e+000	3.042503e+000	67.5	28	6.965461e+000	0	0	0	0	0	0	5.58307	1	0	65	27.8
DATA	2395	29	15	0	0	A_64_P009582	XM_214287	10244.4	396.573	3.237962e+004	3.237963e+003	31535	31	9.979145e+000	0	0	0	0	0	0	31901.1	1	1	57.5363	31.2
DATA	2396	29	16	0	0	A_44_P527270	NM_020073	10269.5	397.092	8.401743e+001	8.913156e+000	142	27.5	6.657327e+000	0	0	0	0	0	0	82.9528	1	1	44.7812	27
DATA	2397	29	17	0	0	A_44_P530813	NM_012922	10295.4	397.016	3.690632e+002	3.702563e+001	420	31	7.472864e+000	0	0	0	0	0	0	365.086	1	1	44.0646	30.5429
DATA	2398	29	18	0	0	A_64_P078210	NM_001044303	10320.6	396.921	3.101090e+001	4.290538e+000	91.5	28	5.751232e+000	0	0	0	0	0	0	30.7276	1	1	44.7812	28.92
DATA	2399	29	19	0	0	A_42_P764985	NM_133402	10345.7	397.167	6.942506e+003	6.942569e+002	6724	28.5	8.699914e+000	0	0	0	0	0	0	6889.3	1	1	45.835	28.3667
DATA	2400	29	20	0	0	A_43_P23097	NM_001011965	10371.3	396.848	2.411583e+001	3.815747e+000	85	24	8.644246e+000	0	0	0	0	0	0	23.9607	1	1	45.835	26.9667
DATA	2401	29	21	0	0	A_43_P19450	NM_001105713	10396.6	397	1.830880e+002	1.854555e+001	240	29.5	8.515863e+000	0	0	0	0	0	0	182.106	1	1	48.5334	29.2083
DATA	2402	29	22	0	0	A_42_P514419	NM_001009599	10422.1	397.273	1.373291e+003	1.373608e+002	1443.5	29	7.758943e+000	0	0	0	0	0	0	1367.15	1	1	45.835	29.4865
DATA	2403	29	23	0	0	A_64_P123974	A_64_P123974	10447.6	396.573	4.158229e+000	2.978675e+000	65	30	7.678629e+000	0	0	0	0	0	0	4.14206	1	0	57.5363	30.5429
DATA	2404	29	24	0	0	A_64_P221399	NM_134415	10472.9	397.156	2.473828e+003	2.474003e+002	2513.5	30	5.857714e+000	0	0	0	0	0	0	2465.5	1	1	45.4864	31.2069
DATA	2405	29	25	0	0	A_44_P760124	A_44_P760124	10498.2	397.033	3.538629e+002	3.550881e+001	425	28	8.526085e+000	0	0	0	0	0	0	352.762	1	1	44.7812	31.2
DATA	2406	29	26	0	0	A_42_P589551	NM_001037093	10523.8	396.974	2.764231e+003	2.764388e+002	2777.5	26	6.704596e+000	0	0	0	0	0	0	2755.82	1	1	49.1849	27.375
DATA	2407	29	27	0	0	A_42_P645467	NM_001108804	10549.2	396.841	1.810802e+001	3.459201e+000	80	27	1.026316e+001	0	0	0	0	0	0	18.0506	1	1	46.1809	30.7586
DATA	2408	29	28	0	0	A_64_P036006	A_64_P036006	10574.8	396.634	2.959873e+000	2.949405e+000	60	28	7.666994e+000	0	0	0	0	0	0	0.785013	0	0	46.8651	28.129
DATA	2409	29	29	0	0	A_64_P088575	NM_001106355	10600	397	3.683243e+002	3.695035e+001	433	27.5	7.262850e+000	0	0	0	0	0	0	366.872	1	1	54.9904	27.3438
DATA	2410	29	30	0	0	A_42_P798776	XM_002725203	10625.3	397.014	4.553496e+003	4.553591e+002	4559	28	9.022459e+000	0	0	0	0	0	0	4532.52	1	1	47.2035	29.5
DATA	2411	29	31	0	0	A_64_P017424	XM_001067041	10650.6	397.029	2.965676e+000	2.956022e+000	63	28	8.516284e+000	0	0	0	0	0	0	1.05089	0	0	46.8651	29.7931
DATA	2412	29	32	0	0	A_64_P147358	NM_001105764	10675.8	397.194	1.983683e+003	1.983903e+002	2013	34	7.568114e+000	0	0	0	0	0	0	1970.91	1	1	47.5395	34.2593
DATA	2413	29	33	0	0	A_42_P522285	NM_001044263	10701.2	397	3.871156e+002	3.882462e+001	419	31	7.125973e+000	0	0	0	0	0	0	384.154	1	1	46.8651	30.8
DATA	2414	29	34	0	0	A_64_P130184	NM_017207	10727.2	397.103	2.309319e+003	2.309509e+002	2340.5	32	6.599902e+000	0	0	0	0	0	0	2288.46	1	1	46.5243	30.9394
DATA	2415	29	35	0	0	A_44_P167930	NM_012720	10752.2	397	2.959656e+003	2.959805e+002	2905	31	7.125453e+000	0	0	0	0	0	0	2928.43	1	1	46.8651	29.8148
DATA	2416	29	36	0	0	A_64_P135305	NM_001013426	10777.4	397	8.543965e+003	8.544017e+002	8383	29	4.976665e+000	0	0	0	0	0	0	8439.56	1	1	48.5334	29.2143
DATA	2417	29	37	0	0	A_64_P100182	NM_001077678	10803.1	397.065	1.158129e+001	3.197124e+000	73	30	6.356517e+000	0	0	0	0	0	0	11.4183	1	0	54.4085	30.0303
DATA	2418	29	38	0	0	A_44_P521699	NM_001007728	10828.4	396.973	2.130799e+002	2.151620e+001	271.5	29	5.085258e+000	0	0	0	0	0	0	209.653	1	1	48.5334	30.1212
DATA	2419	29	39	0	0	A_64_P053516	NM_001001280	10853.9	397.065	7.185258e+000	3.077615e+000	69	26	7.360891e+000	0	0	0	0	0	0	7.05434	1	0	65	27.3824
DATA	2420	29	40	0	0	A_64_P073183	XM_001061392	10878.8	397.243	5.116700e+003	5.116788e+002	4860	30.5	7.038049e+000	0	0	0	0	0	0	5012.11	1	1	46.8651	31.0789
DATA	2421	29	41	0	0	A_64_P067447	NM_001109440	10904.3	397.014	1.004412e+003	1.004862e+002	1031	28	9.242491e+000	0	0	0	0	0	0	981.405	1	1	47.2035	29.931
DATA	2422	29	42	0	0	A_64_P089251	NM_001014109	10929.9	397.181	5.465999e+001	6.242298e+000	113	28	5.858344e+000	0	0	0	0	0	0	53.2679	1	1	46.8651	27.9655
DATA	2423	29	43	0	0	A_64_P118192	NM_022797	10955.5	396.896	9.318202e+002	9.323106e+001	966	27	6.419170e+000	0	0	0	0	0	0	905.523	1	1	49.5074	27.0333
DATA	2424	29	44	0	0	A_64_P082584	ENSRNOT00000024258	10980.8	397.016	1.590925e+002	1.619561e+001	222	29	8.604863e+000	0	0	0	0	0	0	154.158	1	1	45.4864	30.6765
DATA	2425	29	45	0	0	A_42_P465677	NM_001106241	11006.3	397.083	2.486236e+002	2.504769e+001	298.5	29	7.812825e+000	0	0	0	0	0	0	240.181	1	1	50.1463	29.8333
DATA	2426	29	46	0	0	A_42_P781999	NM_001106378	11031.6	397.36	2.060492e+004	2.060494e+003	19531	29	7.861490e+000	0	0	0	0	0	0	19843.1	1	1	48.8603	30.7727
DATA	2427	29	47	0	0	A_44_P991472	NM_134374	11056.7	397.373	1.259350e+003	1.259722e+002	1227	30	8.042116e+000	0	0	0	0	0	0	1208.84	1	1	49.1849	28.9714
DATA	2428	29	48	0	0	A_42_P767737	AY724480	11082.3	397.312	3.375885e+003	3.376025e+002	3169.5	29	8.956560e+000	0	0	0	0	0	0	3229.33	1	1	49.8279	31.1282
DATA	2429	29	49	0	0	A_42_P648200	NM_001037356	11107.6	396.806	1.279900e+002	1.316495e+001	180	31.5	6.483496e+000	0	0	0	0	0	0	121.994	1	1	46.5243	30.4643
DATA	2430	29	50	0	0	A_64_P006062	NM_001191695	11132.9	396.825	1.514190e+002	1.545470e+001	203	31	8.165770e+000	0	0	0	0	0	0	143.802	1	1	45.4864	30.8444
DATA	2431	29	51	0	0	A_42_P728230	NM_001037782	11158.3	397.222	4.043971e+003	4.044090e+002	3872.5	33.5	7.952238e+000	0	0	0	0	0	0	3826.38	1	1	47.5395	33.1429
DATA	2432	29	52	0	0	A_64_P106011	A_64_P106011	11184	397.455	3.129373e+000	3.117193e+000	62.5	29	7.313112e+000	0	0	0	0	0	0	-0.406893	0	0	65	29.9667
DATA	2433	29	53	0	0	A_42_P622661	NM_001024292	11209.1	397.526	1.913950e+003	1.914206e+002	1747.5	30	6.381062e+000	0	0	0	0	0	0	1796.9	1	1	50.1463	31.1111
DATA	2434	29	54	0	0	A_42_P619844	NM_001030037	11234.6	397.5	7.186768e+003	7.186837e+002	6423.5	31.5	6.405560e+000	0	0	0	0	0	0	6719.75	1	1	49.8279	30.6176
DATA	2436	29	56	0	0	A_64_P128260	XM_001056985	11285.1	397.648	9.615801e+002	9.621020e+001	933	30	5.679050e+000	0	0	0	0	0	0	891.64	1	1	47.8731	29.4194
DATA	2437	29	57	0	0	A_44_P1034950	NM_053294	11311	397.455	3.009102e+002	3.025886e+001	341.5	27	3.526147e+000	0	0	0	0	0	0	277.786	1	1	55.8519	27.6061
DATA	2438	29	58	0	0	A_64_P080316	NM_139113	11336.3	397.247	4.107736e+002	4.120156e+001	428	31	8.459557e+000	0	0	0	0	0	0	377.53	1	1	48.2044	32.7778
DATA	2439	29	59	0	0	A_64_P053069	NM_001106820	11361.3	397.373	8.302497e+002	8.308703e+001	821	34	7.023009e+000	0	0	0	0	0	0	759.727	1	1	46.1809	34.4138
DATA	2440	29	60	0	0	A_42_P498066	NM_031136	11387.3	397.5	8.303548e+004	8.303549e+003	75781	34.5	7.272748e+000	0	0	0	0	0	0	75629.8	1	1	57.5363	34.3214
DATA	2441	29	61	0	0	A_44_P277068	ENSRNOT00000058491	11412.5	397.5	6.642894e+003	6.642973e+002	5912	26.5	7.889783e+000	0	0	0	0	0	0	6022.83	1	1	49.1849	28.7857
DATA	2442	29	62	0	0	A_44_P685613	XM_225679	11437.7	397.468	1.605108e+003	1.605438e+002	1428	29	6.906441e+000	0	0	0	0	0	0	1448.54	1	1	49.8279	30.0323
DATA	2443	29	63	0	0	A_64_P124364	ENSRNOT00000015807	11463.4	397.427	3.279155e+002	3.295431e+001	359	32	1.084481e+001	0	0	0	0	0	0	294.514	1	1	57.5363	33.7879
DATA	2444	29	64	0	0	A_42_P466362	NM_017142	11488.1	397.667	1.006535e+003	1.007071e+002	974	36	9.432545e+000	0	0	0	0	0	0	899.864	1	1	46.5243	36.5172
DATA	2445	29	65	0	0	A_64_P081517	ENSRNOT00000037639	11514.3	397.5	1.018296e+002	1.070520e+001	154	30	8.765571e+000	0	0	0	0	0	0	90.5827	1	1	57.5363	33.0909
DATA	2446	29	66	0	0	A_42_P629394	NM_031683	11538.9	397.464	2.779156e+003	2.779354e+002	2369	27	6.280079e+000	0	0	0	0	0	0	2460.57	1	1	47.5395	27.2424
DATA	2447	29	67	0	0	A_44_P500975	NM_001000833	11564.8	397.591	4.868270e+001	5.900981e+000	105	30	4.725213e+000	0	0	0	0	0	0	42.8894	1	1	46.1809	28.4074
DATA	2448	29	68	0	0	A_64_P165046	ENSRNOT00000015927	11590.3	397.676	1.005111e+002	1.059512e+001	148.5	27	6.643472e+000	0	0	0	0	0	0	88.1145	1	1	48.2044	26.25
DATA	2449	29	69	0	0	A_44_P222865	XM_235305	11615.3	397.662	9.967049e+003	9.967106e+002	8458	29.5	8.318717e+000	0	0	0	0	0	0	8695.33	1	1	48.5334	30.6429
DATA	2451	29	71	0	0	A_64_P131688	XM_574187	11666.5	397.5	3.415015e+000	3.401723e+000	58	29	4.583113e+000	0	0	0	0	0	0	-2.67229	0	0	57.5363	28.8276
DATA	2452	29	72	0	0	A_42_P556457	NM_001033931	11691.7	397.716	2.343449e+003	2.343699e+002	2012	26.5	5.203148e+000	0	0	0	0	0	0	2014.14	1	1	48.8603	26.0357
DATA	2453	29	73	0	0	A_42_P734384	NM_001108406	11716.8	397.356	2.504109e+003	2.504345e+002	2115.5	31	9.518177e+000	0	0	0	0	0	0	2141.52	1	1	48.5334	32.9355
DATA	2454	29	74	0	0	A_42_P728032	XM_001066058	11742.1	397.529	1.194427e+003	1.194926e+002	1071.5	33	1.085796e+001	0	0	0	0	0	0	1016.46	1	1	47.8731	34.3667
DATA	2455	29	75	0	0	A_64_P151525	A_64_P151525	11768.1	397.5	4.009114e+001	5.302271e+000	96	33	9.244753e+000	0	0	0	0	0	0	33.9448	1	1	56.9804	32.9189
DATA	2456	29	76	0	0	A_43_P19276	ENSRNOT00000039523	11793.1	397.896	6.270410e+002	6.280096e+001	590	33	7.054410e+000	0	0	0	0	0	0	528.389	1	1	46.8651	34
DATA	2457	29	77	0	0	A_44_P529811	NM_001107657	11818.2	397.569	1.683010e+001	3.887079e+000	74	36	1.178581e+001	0	0	0	0	0	0	14.1124	1	0	47.8731	35.9697
DATA	2458	29	78	0	0	A_64_P104640	A_64_P104640	11843.9	397.722	2.719788e+004	2.719790e+003	22429.5	28	9.001214e+000	0	0	0	0	0	0	22694.5	1	1	47.8731	28.4857
DATA	2459	29	79	0	0	A_64_P003234	NM_001109048	11869.6	397.573	3.683041e+001	5.107427e+000	92	31.5	7.107470e+000	0	0	0	0	0	0	30.5805	1	1	57.5363	31.25
DATA	2460	29	80	0	0	A_64_P097158	NM_001000875	11895	397.545	3.569478e+000	3.557942e+000	64	34	7.847550e+000	0	0	0	0	0	0	1.06987	0	0	65	32.2593
DATA	2461	29	81	0	0	A_64_P141814	NM_001134629	11919.9	397.764	2.342274e+002	2.369354e+001	253	32	7.418963e+000	0	0	0	0	0	0	192.658	1	1	47.8731	32.6786
DATA	2462	29	82	0	0	A_42_P463602	NM_001107592	11945.6	397.803	3.602979e+000	3.589385e+000	64	29.5	6.292159e+000	0	0	0	0	0	0	0.454084	0	0	47.5395	29.5357
DATA	2463	29	83	0	0	A_64_P083366	NM_001077643	11970.7	397.58	1.919536e+004	1.919539e+003	15341	29	9.572491e+000	0	0	0	0	0	0	15641	1	1	46.8651	32.4848
DATA	2464	29	84	0	0	A_44_P121039	NM_172008	11996.3	397.662	2.376880e+002	2.404322e+001	258.5	31	6.699359e+000	0	0	0	0	0	0	192.791	1	1	48.5334	30.125
DATA	2465	29	85	66	1	DarkCorner	DarkCorner	12021.9	397.609	3.652963e+000	3.638745e+000	58	29.5	8.749367e+000	0	0	0	0	0	0	-4.77623	0	0	52.0157	29.0417
DATA	2466	30	1	66	1	DarkCorner	DarkCorner	9901.2	404.039	3.143088e+000	3.130855e+000	53.5	25	7.070904e+000	0	0	0	0	0	0	-6.21832	0	0	49.1849	25.619
DATA	2467	30	2	0	0	A_42_P687443	NM_020100	9927.09	403.935	1.974810e+002	1.999223e+001	245	25	7.209736e+000	0	0	0	0	0	0	186.275	1	1	54.4085	25.1379
DATA	2468	30	3	0	0	A_42_P563382	ENSRNOT00000055321	9952.35	403.914	2.613657e+003	2.613840e+002	2497	32	7.622723e+000	0	0	0	0	0	0	2477.21	1	1	49.5074	29.9655
DATA	2469	30	4	0	0	A_42_P667100	NM_001013932	9977.56	403.973	1.416467e+003	1.416803e+002	1383	29	5.659165e+000	0	0	0	0	0	0	1348.69	1	1	48.5334	30.1154
DATA	2470	30	5	0	0	A_42_P553319	TC597248	10003.1	404.099	1.184195e+002	1.223393e+001	171	31	5.350368e+000	0	0	0	0	0	0	113.254	1	1	46.8651	30.1667
DATA	2471	30	6	0	0	A_64_P151358	NM_181695	10028.8	404	2.929695e+001	4.235769e+000	88	31	7.544278e+000	0	0	0	0	0	0	28.1367	1	1	47.8731	29.871
DATA	2472	30	7	0	0	A_44_P196743	ENSRNOT00000007795	10054	404	3.059197e+000	3.047290e+000	55	30	6.732213e+000	0	0	0	0	0	0	-4.94235	0	0	54.9904	30.0286
DATA	2474	30	9	0	0	A_64_P127111	NM_001106004	10104.5	403.926	9.924272e+003	9.924318e+002	9428	31.5	7.580136e+000	0	0	0	0	0	0	9637.14	1	1	49.8279	31.4615
DATA	2475	30	10	0	0	A_42_P470775	NM_001025126	10129.9	404.104	1.617455e+003	1.617736e+002	1606	28.5	7.413848e+000	0	0	0	0	0	0	1575.85	1	1	46.8651	29.1842
DATA	2476	30	11	0	0	A_44_P472855	NM_001000961	10155.4	403.823	1.302587e+002	1.336833e+001	184	26	7.549393e+000	0	0	0	0	0	0	127.294	1	1	49.5074	25.92
DATA	2477	30	12	0	0	A_64_P080682	NM_001109652	10181.3	403.863	3.009492e+000	2.997778e+000	59	27.5	7.643512e+000	0	0	0	0	0	0	-0.668777	0	0	49.5074	27.8571
DATA	2478	30	13	0	0	A_42_P727368	NM_001025693	10205.9	404.099	8.682601e+001	9.183039e+000	146	30	6.349527e+000	0	0	0	0	0	0	85.3145	1	1	46.8651	29.0238
DATA	2479	30	14	0	0	A_64_P034427	A_64_P034427	10231.7	404.246	3.661125e+003	3.661246e+002	3633	30.5	8.734202e+000	0	0	0	0	0	0	3606.26	1	1	45.1352	30.8125
DATA	2480	30	15	0	0	A_64_P042871	A_64_P042871	10256.9	404.313	5.554575e+002	5.562543e+001	624	29.5	8.489444e+000	0	0	0	0	0	0	548.332	1	1	45.835	30.625
DATA	2481	30	16	0	0	A_64_P152617	NM_001105747	10281.9	404.222	5.879429e+000	3.028075e+000	65	31	7.765410e+000	0	0	0	0	0	0	5.81528	1	0	45.4864	29.3889
DATA	2482	30	17	0	0	A_44_P468879	NM_001007798	10308.3	404.176	1.854835e+001	3.497371e+000	80	31	5.474527e+000	0	0	0	0	0	0	18.3797	1	1	45.835	29.4483
DATA	2483	30	18	0	0	A_44_P252976	NM_001012071	10333.5	404	1.269001e+002	1.303076e+001	182	27	6.387086e+000	0	0	0	0	0	0	125.939	1	1	54.1152	28.7778
DATA	2484	30	19	0	0	A_64_P014080	NM_022189	10358.6	404.427	2.967894e+000	2.957787e+000	62	27	8.205804e+000	0	0	0	0	0	0	0.918687	0	0	57.5363	28.0909
DATA	2485	30	20	0	0	A_44_P204789	NM_001025684	10384.4	404.404	5.034887e+002	5.043538e+001	571.5	23	8.034924e+000	0	0	0	0	0	0	500.957	1	1	65	26.32
DATA	2486	30	21	0	0	A_64_P030373	NM_001127319	10409.5	404.352	4.295455e+001	5.210961e+000	102	27	6.342412e+000	0	0	0	0	0	0	42.7787	1	1	57.5363	27.3214
DATA	2487	30	22	0	0	A_42_P558703	NM_001106810	10435	404.384	4.264506e+002	4.274683e+001	480.5	29	7.262659e+000	0	0	0	0	0	0	425.028	1	1	48.8603	29.0606
DATA	2488	30	23	0	0	A_44_P241190	NM_001013199	10460	404.343	7.424351e+002	7.430195e+001	791	30	4.590363e+000	0	0	0	0	0	0	740.362	1	1	45.4864	32
DATA	2489	30	24	0	0	A_42_P539095	XM_001081794	10485.6	404.64	9.883769e+002	9.888156e+001	1048	29	6.975856e+000	0	0	0	0	0	0	986.011	1	1	48.8603	30.6552
DATA	2490	30	25	0	0	A_64_P010905	ENSRNOT00000057216	10511	404.455	1.229378e+002	1.264152e+001	185	27	7.571002e+000	0	0	0	0	0	0	122.662	1	1	55.8519	28.4848
DATA	2491	30	26	0	0	A_44_P500660	NM_001007645	10536.4	403.768	3.893495e+002	3.904617e+001	449	27	6.126137e+000	0	0	0	0	0	0	388.439	1	1	46.8651	27.3793
DATA	2492	30	27	0	0	A_64_P056436	A_64_P056436	10561.7	404.043	3.049893e+002	3.064082e+001	369	29	1.268141e+001	0	0	0	0	0	0	304.222	1	1	46.5243	32.5455
DATA	2493	30	28	0	0	A_42_P773816	NM_017079	10587.4	404.427	8.478015e+001	8.975444e+000	145	28	8.052503e+000	0	0	0	0	0	0	84.5367	1	1	57.5363	28.9697
DATA	2494	30	29	0	0	A_64_P138604	NM_001009967	10612.6	404.427	5.510036e+004	5.510037e+003	54321.5	31	9.654822e+000	0	0	0	0	0	0	54910.8	1	1	57.5363	33.2083
DATA	2495	30	30	0	0	A_42_P705302	NM_001107361	10637.7	404.605	7.232908e+003	7.232968e+002	7332	30	8.485281e+000	0	0	0	0	0	0	7202.78	1	1	49.5074	30.6667
DATA	2496	30	31	0	0	A_64_P027259	NM_001191656	10663.3	404.395	2.203269e+004	2.203271e+003	21666	32	8.490404e+000	0	0	0	0	0	0	21919.8	1	1	49.5074	32
DATA	2497	30	32	0	0	A_44_P288333	ENSRNOT00000006659	10688.8	404.612	2.855298e+002	2.870562e+001	357	34	8.266958e+000	0	0	0	0	0	0	283.758	1	1	46.5243	32.75
DATA	2498	30	33	0	0	A_42_P618217	NM_130752	10714.3	404.403	7.496282e+001	8.059614e+000	136	31	5.976424e+000	0	0	0	0	0	0	74.4001	1	1	48.5334	30.6
DATA	2499	30	34	0	0	A_64_P151587	A_64_P151587	10739.9	404.295	2.976205e+000	2.966554e+000	63	32	7.228331e+000	0	0	0	0	0	0	1.06114	0	0	44.4243	30.9655
DATA	2500	30	35	0	0	A_42_P771107	NM_001108217	10764.7	404.458	8.406389e+002	8.411631e+001	874.5	29	6.093524e+000	0	0	0	0	0	0	831.803	1	1	48.2044	29.2
DATA	2501	30	36	0	0	A_42_P689013	NM_053800	10790.1	404.389	1.775598e+004	1.775601e+003	17314	28	6.554809e+000	0	0	0	0	0	0	17538.1	1	1	48.2044	28.4138
DATA	2502	30	37	0	0	A_64_P155334	NM_001100945	10815.6	404.64	3.377450e+003	3.377582e+002	3362.5	30	6.106690e+000	0	0	0	0	0	0	3329.61	1	1	48.8603	30.6667
DATA	2503	30	38	0	0	A_64_P049007	A_64_P049007	10840.9	404.535	2.675988e+001	4.010002e+000	89	27.5	7.186093e+000	0	0	0	0	0	0	26.3256	1	1	47.8731	27.7647
DATA	2504	30	39	0	0	A_44_P351461	ENSRNOT00000027179	10866.5	404.5	3.193852e+001	4.377259e+000	93	28	7.605742e+000	0	0	0	0	0	0	31.3491	1	1	57.5363	28.7742
DATA	2505	30	40	0	0	A_44_P604267	NM_022933	10892	404.545	3.324582e+002	3.338094e+001	384.5	29	8.278195e+000	0	0	0	0	0	0	325.541	1	1	55.8519	31.3235
DATA	2506	30	41	0	0	A_64_P070475	XM_001061514	10917.4	404.643	6.213251e+000	3.071549e+000	66	27	7.247750e+000	0	0	0	0	0	0	6.06864	1	0	41.4593	26.2333
DATA	2507	30	42	0	0	A_64_P119963	A_64_P119963	10942.5	404.386	1.597529e+003	1.597813e+002	1597	28	7.865401e+000	0	0	0	0	0	0	1556.15	1	1	47.5395	28.8824
DATA	2508	30	43	0	0	A_42_P658562	NM_001134416	10968.3	404.5	3.333338e+002	3.347033e+001	367.5	27	6.379012e+000	0	0	0	0	0	0	323.776	1	1	57.5363	27.8929
DATA	2509	30	44	0	0	A_64_P116830	A_64_P116830	10993.5	404.5	6.627446e+001	7.288763e+000	127.5	28	7.100204e+000	0	0	0	0	0	0	64.1857	1	1	57.5363	29.2903
DATA	2510	30	45	0	0	A_64_P048531	ENSRNOT00000019473	11019	404.545	1.273873e+002	1.309715e+001	185	29	7.317231e+000	0	0	0	0	0	0	122.991	1	1	55.8519	30.4483
DATA	2511	30	46	0	0	A_64_P122716	NM_139331	11044.4	404.573	4.946798e+000	3.092670e+000	66	28	7.579952e+000	0	0	0	0	0	0	4.76076	1	0	57.5363	29.7931
DATA	2512	30	47	0	0	A_64_P077323	NM_201992	11069.6	404.573	1.137736e+001	3.267448e+000	73	27.5	8.740249e+000	0	0	0	0	0	0	10.9133	1	0	65	28.2333
DATA	2513	30	48	0	0	A_42_P569711	NM_001108977	11095.2	404.824	2.142901e+002	2.164831e+001	259	32	7.412936e+000	0	0	0	0	0	0	204.841	1	1	48.2044	31.625
DATA	2514	30	49	0	0	A_42_P474100	NM_001191820	11120.1	404.507	5.198931e+003	5.199023e+002	4876	31.5	8.882410e+000	0	0	0	0	0	0	4952.11	1	1	47.8731	32.0714
DATA	2515	30	50	0	0	A_64_P026404	A_64_P026404	11146	404.545	3.108182e+000	3.103272e+000	62	32	6.887764e+000	0	0	0	0	0	0	2.00315	0	0	65	30.9231
DATA	2516	30	51	0	0	A_64_P026581	ENSRNOT00000029099	11171.3	404.395	3.890768e+003	3.890892e+002	3646	33	6.279760e+000	0	0	0	0	0	0	3678.14	1	1	49.5074	32.6538
DATA	2517	30	52	0	0	A_64_P043624	NM_133565	11196.6	404.521	2.698435e+003	2.698616e+002	2525	29	6.406325e+000	0	0	0	0	0	0	2541.15	1	1	48.2044	29.6786
DATA	2518	30	53	0	0	A_44_P417429	NM_001011983	11221.7	404.679	2.667640e+003	2.667824e+002	2451	28	6.846866e+000	0	0	0	0	0	0	2502.32	1	1	50.7771	28.2903
DATA	2519	30	54	0	0	A_64_P007574	ENSRNOT00000028681	11247.3	404.84	2.074244e+004	2.074246e+003	18508	31	6.441667e+000	0	0	0	0	0	0	19377.5	1	1	49.1849	31.069
DATA	2520	30	55	0	0	A_42_P529690	NM_001173510	11272.6	405	1.986227e+004	1.986230e+003	18640	30	7.420539e+000	0	0	0	0	0	0	18478.5	1	1	46.5243	30.5758
DATA	2521	30	56	0	0	A_42_P505070	TC624062	11298.2	404.946	2.422196e+003	2.422404e+002	2241	27	4.194195e+000	0	0	0	1	0	0	2243.76	1	1	48.5334	27.5357
DATA	2522	30	57	0	0	A_42_P504653	NM_017143	11323.6	404.573	3.285395e+001	4.576267e+000	92	29	7.057239e+000	0	0	0	0	0	0	30.3002	1	1	57.5363	30.7308
DATA	2523	30	58	0	0	A_64_P017891	A_64_P017891	11349.1	404.614	9.425885e+000	3.335747e+000	72	31.5	7.427961e+000	0	0	0	0	0	0	8.65479	1	0	57.259	33.7143
DATA	2524	30	59	0	0	A_42_P642724	NM_001107585	11374.1	404.896	3.826335e+003	3.826470e+002	3330	34	8.111558e+000	0	0	0	0	0	0	3498	1	1	46.8651	34.5938
DATA	2525	30	60	0	0	A_42_P780943	NM_001011906	11399.1	404.692	8.526424e+002	8.532534e+001	857.5	31.5	9.882354e+000	0	0	0	0	0	0	775.96	1	1	45.835	33.1667
DATA	2526	30	61	0	0	A_44_P482325	NM_145669	11425.2	404.893	8.011727e+002	8.018291e+001	767	28	9.188703e+000	0	0	0	0	0	0	725.695	1	1	48.2044	29.8529
DATA	2527	30	62	0	0	A_42_P716750	NM_001024757	11450.2	405	2.206450e+002	2.230381e+001	255	29	6.343027e+000	0	0	0	0	0	0	198.944	1	1	46.8651	29.3448
DATA	2528	30	63	0	0	A_64_P009565	NM_001191823	11475.8	405.096	1.970925e+002	1.997932e+001	239	32	1.036258e+001	0	0	0	0	0	0	176.87	1	1	47.8731	33.6875
DATA	2529	30	64	0	0	A_42_P495969	NM_012824	11501	404.912	8.893393e+003	8.893453e+002	7915.5	31	9.391443e+000	0	0	0	0	0	0	7942.87	1	1	46.8651	33.4722
DATA	2530	30	65	0	0	A_64_P154671	ENSRNOT00000024704	11526.5	405	2.708489e+002	2.728585e+001	296	29	8.877797e+000	0	0	0	0	0	0	240.74	1	1	54.1152	32.3793
DATA	2531	30	66	0	0	A_44_P111337	NM_001108724	11552.2	404.873	2.517756e+003	2.517975e+002	2221	26	6.346715e+000	0	0	0	0	0	0	2226.86	1	1	47.2035	27.069
DATA	2532	30	67	0	0	A_42_P665627	NM_023095	11577.6	405.015	7.624687e+001	8.323326e+000	132	27	6.563011e+000	0	0	0	0	0	0	67.1119	1	1	45.1352	26.1613
DATA	2533	30	68	0	0	A_44_P447585	NM_001166676	11603	405	5.659927e+000	3.401782e+000	68	26	7.051424e+000	0	0	0	0	0	0	4.95744	1	0	54.9904	27.4516
DATA	2534	30	69	0	0	A_42_P463754	NM_030994	11628	404.986	4.905705e+002	4.917271e+001	476	29	8.067005e+000	0	0	0	0	0	0	427.604	1	1	46.8651	30.0811
DATA	2535	30	70	0	0	A_42_P644717	NM_001108927	11653.8	404.985	1.029185e+001	3.540447e+000	71	28	6.117381e+000	0	0	0	0	0	0	8.92615	1	0	46.1809	27.2121
DATA	2536	30	71	0	0	A_42_P546539	NM_001135801	11679	404.917	6.049912e+002	6.059483e+001	588	27.5	5.631035e+000	0	0	0	0	0	0	522.131	1	1	46.8651	27.5588
DATA	2537	30	72	0	0	A_42_P818297	XM_001073988	11704.5	405	1.641027e+003	1.641383e+002	1401.5	27	7.519308e+000	0	0	0	0	0	0	1409.29	1	1	48.5334	26.96
DATA	2538	30	73	0	0	A_64_P047416	NM_001109501	11729.7	404.905	2.679293e+002	2.701261e+001	291	31	1.119740e+001	0	0	0	0	0	0	228.963	1	1	48.8603	32.1034
DATA	2539	30	74	0	0	A_43_P18389	XM_002726292	11755.3	404.672	1.393418e+001	3.725734e+000	73	26.5	7.026714e+000	0	0	0	0	0	0	11.848	1	0	44.7812	27.9333
DATA	2540	30	75	0	0	A_64_P044276	NM_001105946	11780.3	404.866	3.035205e+003	3.035404e+002	2835	31.5	8.749121e+000	0	0	0	0	0	0	2568.48	1	1	45.835	31.9333
DATA	2541	30	76	0	0	A_64_P059475	ENSRNOT00000029976	11806.4	405.069	3.502900e+000	3.489267e+000	63	32	9.361899e+000	0	0	0	0	0	0	-0.574638	0	0	65	30.6129
DATA	2542	30	77	0	0	A_64_P005496	A_64_P005496	11831.5	405	8.232408e+000	3.601497e+000	69.5	32	1.311443e+001	0	0	0	0	0	0	6.89849	1	0	54.1152	33.8
DATA	2544	30	79	0	0	A_42_P739860	NM_133578	11881.9	405.187	2.417670e+003	2.417930e+002	1895.5	31	7.591875e+000	0	0	0	1	0	0	2006.77	1	1	47.8731	31.3548
DATA	2545	30	80	0	0	A_42_P681251	NM_030844	11907.5	404.743	3.896206e+003	3.896369e+002	3137	34	8.005863e+000	0	0	0	0	0	0	3218.22	1	1	47.2035	35.4231
DATA	2546	30	81	0	0	A_42_P567793	NM_001107668	11932.6	405.027	2.487706e+003	2.487963e+002	1996	30	6.799920e+000	0	0	0	0	0	0	2045.48	1	1	48.5334	31.1034
DATA	2547	30	82	0	0	A_64_P041662	NM_182843	11958.3	404.716	4.108947e+002	4.124603e+001	393.5	30	5.862799e+000	0	0	0	0	0	0	336.241	1	1	46.1809	29.8
DATA	2548	30	83	0	0	A_42_P534679	NM_001134974	11983.8	404.812	2.872348e+003	2.872574e+002	2271	31	1.011685e+001	0	0	0	0	0	0	2339.81	1	1	46.1809	31.9737
DATA	2549	30	84	66	1	DarkCorner	DarkCorner	12009.4	405.427	3.636657e+000	3.622503e+000	56	32	7.229980e+000	0	0	0	0	0	0	-7.33133	0	0	57.5363	30.1282
DATA	2550	30	85	66	1	DarkCorner	DarkCorner	12034.7	405.481	3.652630e+000	3.638413e+000	60	28	7.458982e+000	0	0	0	0	0	0	-2.2018	0	0	50.4627	28.6477
DATA	2551	31	1	66	1	DarkCorner	DarkCorner	9888.58	411.208	3.147604e+000	3.135353e+000	54	24	6.395915e+000	0	0	0	0	0	0	-3.51845	0	0	47.8731	24.7831
DATA	2552	31	2	0	0	A_42_P576549	NM_001106490	9914.5	411	8.611260e+000	3.235735e+000	68	27.5	8.170472e+000	0	0	0	0	0	0	8.11152	1	0	54.1152	28.3571
DATA	2553	31	3	0	0	A_42_P542638	NM_001012202	9939.64	411.13	6.795644e+002	6.802729e+001	710	33	9.336909e+000	0	0	0	0	0	0	643.263	1	1	46.8651	30.2174
DATA	2554	31	4	0	0	A_42_P765736	NM_001025670	9965.3	411.132	3.289293e+001	4.512470e+000	91	32	7.167768e+000	0	0	0	0	0	0	31.2838	1	1	48.8603	30.7576
DATA	2555	31	5	0	0	A_44_P372461	NM_001170708	9990.79	411.194	7.987888e+002	7.993806e+001	831	29	6.061847e+000	0	0	0	0	0	0	763.13	1	1	47.5395	28.7353
DATA	2556	31	6	0	0	A_64_P070554	XM_001059856	10015.9	411.183	3.413790e+001	4.586146e+000	91	30	7.400860e+000	0	0	0	0	0	0	32.7507	1	1	46.8651	29.0909
DATA	2557	31	7	0	0	A_64_P030859	ENSRNOT00000045252	10040.9	411.268	1.703835e+004	1.703838e+003	16056	32	7.380576e+000	0	0	0	0	0	0	16411.3	1	1	47.5395	31.5172
DATA	2558	31	8	0	0	A_64_P079260	NM_001005546	10066.5	412.071	1.173271e+002	1.211974e+001	169	30	6.585256e+000	0	0	0	0	0	0	113.454	1	1	47.8731	29.0323
DATA	2559	31	9	0	0	A_64_P149846	A_64_P149846	10092	411.298	1.249537e+004	1.249540e+003	12245	30	7.611536e+000	0	0	0	0	0	0	12125.2	1	1	45.835	29.75
DATA	2560	31	10	0	0	A_64_P120624	NM_031634	10117	411.38	3.492996e+000	3.037843e+000	64	30	8.072787e+000	0	0	0	0	0	0	3.40079	1	0	47.8731	31.3548
DATA	2561	31	11	0	0	A_64_P158020	NM_001008909	10143.2	410.903	5.939106e+001	6.657452e+000	118	26	5.256742e+000	0	0	0	0	0	0	58.0077	1	1	47.2035	26.2333
DATA	2562	31	12	0	0	A_64_P116606	NM_153724	10168.4	411.23	5.968676e+001	6.679876e+000	118	28.5	8.509994e+000	0	0	0	0	0	0	58.4681	1	1	49.1849	28.5
DATA	2563	31	13	0	0	A_44_P532436	ENSRNOT00000006946	10193.4	411.423	1.561801e+001	3.374393e+000	76	28	7.115337e+000	0	0	0	0	0	0	15.3404	1	1	47.8731	27.7813
DATA	2564	31	14	0	0	A_64_P027545	NM_023095	10219.4	411.941	2.253510e+002	2.273172e+001	291	28.5	7.942452e+000	0	0	0	0	0	0	221.925	1	1	46.1809	29.0556
DATA	2565	31	15	0	0	A_64_P076705	NM_017088	10244.4	411.427	1.098082e+005	1.098082e+004	108088	32	1.099067e+001	0	0	0	0	0	0	108376	1	1	57.5363	33.4444
DATA	2566	31	16	0	0	A_44_P238642	NM_001127201	10269.4	411.556	4.633965e+003	4.634060e+002	4509	28.5	9.524379e+000	0	0	0	0	0	0	4582.94	1	1	48.2044	28.9
DATA	2567	31	17	0	0	A_64_P037249	NM_001105802	10295.7	411.432	8.185863e+001	8.706310e+000	141	31	6.873037e+000	0	0	0	0	0	0	81.113	1	1	48.8603	29.6364
DATA	2568	31	18	0	0	A_64_P061524	NM_172064	10320.4	411.605	3.222541e+002	3.236108e+001	374	27	6.062876e+000	0	0	0	0	0	0	319.84	1	1	49.5074	27.9615
DATA	2569	31	19	0	0	A_42_P536564	NM_001008344	10345.9	411.722	3.476330e+003	3.476455e+002	3468	27	5.277861e+000	0	0	0	0	0	0	3455.36	1	1	47.8731	27.1786
DATA	2570	31	20	0	0	A_64_P062433	NM_001135804	10371.6	411.582	5.375066e+002	5.383167e+001	592.5	26	9.380528e+000	0	0	0	0	0	0	534.933	1	1	45.835	28.0741
DATA	2571	31	21	0	0	A_42_P665509	NM_053777	10396.7	411.5	5.363272e+004	5.363273e+003	52846.5	30	8.525218e+000	0	0	0	0	0	0	53430.8	1	1	57.5363	30.625
DATA	2572	31	22	0	0	A_44_P250144	NM_001001373	10422.3	411.5	2.958126e+000	2.946613e+000	58.5	27.5	4.501006e+000	0	0	0	0	0	0	-3.20099	0	0	65	27.2083
DATA	2573	31	23	0	0	A_42_P746838	NM_001024286	10447.5	411.5	7.976975e+000	3.050843e+000	70	29.5	7.493472e+000	0	0	0	0	0	0	7.9589	1	0	57.5363	29.8214
DATA	2574	31	24	0	0	A_44_P210852	NM_001034187	10473	411.455	6.939635e+001	7.538036e+000	129	30	6.398725e+000	0	0	0	0	0	0	69.2706	1	1	55.8519	31.5667
DATA	2575	31	25	0	0	A_64_P019390	A_64_P019390	10498.5	411.5	2.514517e+001	3.870604e+000	85	27	6.263120e+000	0	0	0	0	0	0	25.1064	1	1	57.5363	28.32
DATA	2576	31	26	0	0	A_64_P134709	NM_001105760	10523.6	411.466	1.433425e+002	1.463313e+001	201	27.5	7.244499e+000	0	0	0	0	0	0	143.131	1	1	49.1849	29
DATA	2578	31	28	0	0	A_64_P028117	NM_001000372	10574.5	411.5	3.750098e+001	4.767381e+000	99	30.5	1.169050e+001	0	0	0	0	0	0	37.4303	1	1	57.5363	32.7667
DATA	2579	31	29	0	0	A_44_P391517	NM_001034144	10599.9	411.5	5.086649e+002	5.095167e+001	564.5	30	8.501364e+000	0	0	0	0	0	0	507.461	1	1	65	32.7188
DATA	2580	31	30	0	0	A_42_P743682	NM_133599	10625.4	411.573	5.548831e+001	6.282835e+000	120	31	8.954318e+000	0	0	0	0	0	0	55.3206	1	1	65	32.4138
DATA	2581	31	31	0	0	A_64_P163075	NM_001109321	10650.6	411.573	2.812472e+001	4.075411e+000	89.5	28	7.335047e+000	0	0	0	0	0	0	28.0163	1	1	65	28.3929
DATA	2582	31	32	0	0	A_44_P393422	NM_001013188	10676.3	411.5	1.340250e+003	1.340575e+002	1355	33	9.329612e+000	0	0	0	0	0	0	1333.7	1	1	57.5363	31.7917
DATA	2583	31	33	0	0	A_44_P288982	NM_001107913	10701.5	411.711	6.773055e+001	7.389960e+000	127	32	7.902361e+000	0	0	0	0	0	0	67.3217	1	1	49.1849	31.2258
DATA	2584	31	34	0	0	A_64_P009788	NM_001191099	10726.9	411.5	1.441656e+001	3.292379e+000	72	32	7.354081e+000	0	0	0	0	0	0	14.3098	1	0	65	31.8421
DATA	2585	31	35	0	0	A_42_P764228	NM_031707	10752.1	411.761	3.725771e+003	3.725889e+002	3701	31.5	7.194798e+000	0	0	0	0	0	0	3692.7	1	1	46.8651	30.9063
DATA	2586	31	36	0	0	A_64_P161621	NM_001101015	10777.4	411.957	3.725956e+002	3.737768e+001	427	28.5	5.873053e+000	0	0	0	0	0	0	368.677	1	1	46.8651	28.6667
DATA	2587	31	37	0	0	A_42_P763522	NM_001013980	10802.5	411.905	2.516534e+003	2.516710e+002	2506	28.5	6.069426e+000	0	0	0	0	0	0	2485.52	1	1	48.8603	29.3
DATA	2588	31	38	0	0	A_64_P029935	NM_001109299	10828.2	411.957	6.404956e+002	6.411888e+001	704	28	6.313466e+000	0	0	0	0	0	0	631.327	1	1	46.8651	28.7879
DATA	2589	31	39	0	0	A_64_P045053	A_64_P045053	10853.7	411.925	2.619357e+002	2.636335e+001	322	26	6.987321e+000	0	0	0	0	0	0	257.626	1	1	45.835	27.5862
DATA	2590	31	40	0	0	A_42_P540920	NM_001135045	10878.7	412.139	4.555729e+003	4.555828e+002	4334	27	9.228382e+000	0	0	0	0	0	0	4470.74	1	1	47.8731	29.3143
DATA	2591	31	41	0	0	A_64_P055323	NM_001191930	10904.1	411.896	3.180661e+002	3.194790e+001	377	27.5	7.958474e+000	0	0	0	0	0	0	311.359	1	1	46.8651	28.1786
DATA	2592	31	42	0	0	A_64_P047162	NM_153472	10929.9	411.824	3.759974e+003	3.760095e+002	3803	28	7.399914e+000	0	0	0	0	0	0	3670.96	1	1	47.8731	27.3889
DATA	2593	31	43	0	0	A_64_P279594	NM_001170476	10955.5	411.648	1.030441e+001	3.188740e+000	72	29	7.833345e+000	0	0	0	0	0	0	10.0325	1	0	57.5363	30.1935
DATA	2594	31	44	0	0	A_42_P665509	NM_053777	10980.6	411.573	5.080011e+004	5.080012e+003	48348	28	7.501260e+000	0	0	0	0	0	0	49319.2	1	1	57.5363	29.2857
DATA	2595	31	45	0	0	A_64_P106638	NM_001108198	11006.4	411.573	9.300367e+001	9.783213e+000	153	31	8.280308e+000	0	0	0	0	0	0	90.0167	1	1	57.5363	31.7813
DATA	2596	31	46	0	0	A_64_P141245	NM_001105920	11031.4	412.06	1.448768e+003	1.449088e+002	1383.5	29	8.695622e+000	0	0	0	0	0	0	1398.01	1	1	49.8279	31.5769
DATA	2597	31	47	0	0	A_42_P503739	FQ231471	11056.8	412.097	1.435707e+004	1.435710e+003	13403.5	28.5	7.892161e+000	0	0	0	0	0	0	13809	1	1	46.8651	29.3
DATA	2598	31	48	0	0	A_44_P282433	NM_033230	11082	412	7.496104e+002	7.502368e+001	754	29	8.227133e+000	0	0	0	0	0	0	718.578	1	1	46.8651	29.5
DATA	2599	31	49	0	0	A_42_P585750	NM_001202463	11107.7	411.96	3.354589e+000	3.094015e+000	67	32	8.413379e+000	0	0	0	0	0	0	3.20437	1	0	49.1849	31.5806
DATA	2600	31	50	0	0	A_42_P523517	FQ229104	11133	412	4.823399e+003	4.823497e+002	4408	31	7.849428e+000	0	0	0	0	0	0	4590.87	1	1	46.8651	30.1739
DATA	2601	31	51	0	0	A_64_P126190	NM_001113789	11158.3	411.89	2.120148e+001	3.754292e+000	80	34	6.699570e+000	0	0	0	0	0	0	20.1046	1	1	47.8731	33.2069
DATA	2602	31	52	0	0	A_42_P549675	NM_080577	11183.4	412.027	4.411957e+003	4.412067e+002	4089	30	8.300118e+000	0	0	0	0	0	0	4167.97	1	1	48.5334	31.0667
DATA	2603	31	53	0	0	A_42_P535644	NM_024400	11209.5	412	1.981894e+002	2.006342e+001	241	26.5	6.436335e+000	0	0	0	1	0	0	186.477	1	1	54.1152	27.8438
DATA	2604	31	54	0	0	A_64_P050233	XM_345239	11234.9	412.101	2.696449e+002	2.714614e+001	319	31	6.798109e+000	0	0	0	0	0	0	252.695	1	1	46.8651	30
DATA	2605	31	55	0	0	A_64_P121575	NM_001013144	11260.5	412	5.927469e+001	6.711619e+000	117	34	8.467294e+000	0	0	0	0	0	0	55.3184	1	1	54.1152	31.8485
DATA	2606	31	56	0	0	A_64_P018263	NM_012728	11285.4	412.194	3.246453e+002	3.261806e+001	372	28.5	5.524716e+000	0	0	0	0	0	0	301.743	1	1	46.5243	27.8214
DATA	2607	31	57	0	0	A_64_P164682	TC600307	11310.6	412	1.294705e+004	1.294708e+003	11952	29	6.296422e+000	0	0	0	0	0	0	11982.3	1	1	48.5334	30.0833
DATA	2608	31	58	0	0	A_44_P1045612	NM_172317	11336.2	412.072	3.706531e+002	3.720220e+001	407	29.5	7.418213e+000	0	0	0	0	0	0	341.536	1	1	49.8279	31.0667
DATA	2609	31	59	0	0	A_42_P529514	NM_001008308	11361.4	412.027	4.757680e+002	4.768447e+001	494	31	6.214185e+000	0	0	0	0	0	0	436.466	1	1	48.5334	31.9333
DATA	2610	31	60	0	0	A_44_P870348	NM_001107522	11387.2	412	3.434767e+002	3.449802e+001	366	31.5	9.355952e+000	0	0	0	0	0	0	313.667	1	1	46.1809	34.4231
DATA	2611	31	61	0	0	A_64_P108264	XM_223835	11412.4	412.227	8.635545e+001	9.220432e+000	140.5	27	7.451739e+000	0	0	0	0	0	0	78.509	1	1	45.835	28.1818
DATA	2612	31	62	0	0	A_42_P754784	CB328432	11437.9	412.309	5.980310e+003	5.980398e+002	5273	29.5	8.563802e+000	0	0	0	0	0	0	5411.86	1	1	45.835	31.375
DATA	2613	31	63	0	0	A_64_P084525	NM_001101001	11462.9	412.2	1.363370e+003	1.363760e+002	1245	29	8.263837e+000	0	0	0	0	0	0	1228.08	1	1	46.8651	28.0714
DATA	2614	31	64	0	0	A_64_P378583	NM_001099516	11488.5	412	4.367620e+000	3.306330e+000	65	30	7.195282e+000	0	0	0	0	0	0	3.91542	1	0	54.1152	29.8148
DATA	2615	31	65	0	0	A_64_P154172	NM_001000557	11514.4	412.069	3.306124e+000	3.293256e+000	60	28	5.682648e+000	0	0	0	0	0	0	-4.24296	0	0	53.8203	28.7391
DATA	2616	31	66	0	0	A_64_P074634	NM_001024287	11539.3	411.969	1.786761e+002	1.817140e+001	227	29	6.131610e+000	0	0	0	0	0	0	158.653	1	1	45.4864	28.1429
DATA	2617	31	67	1028	1	(+)E1A_r60_a22	E1A_r60_a22	11564.8	412.275	1.413678e+002	1.452247e+001	188	28	5.578816e+000	0	0	0	0	0	0	124.927	1	1	50.4627	27.0833
DATA	2618	31	68	0	0	A_43_P12780	NM_053350	11589.9	412.164	7.503794e+001	8.213897e+000	128	29.5	7.347605e+000	0	0	0	0	0	0	65.9908	1	1	46.5243	28.1111
DATA	2619	31	69	0	0	A_44_P442169	NM_001013034	11615.6	412.147	3.501562e+003	3.501723e+002	3030	26	6.781661e+000	0	0	0	0	0	0	3064.23	1	1	48.8603	28.5938
DATA	2620	31	70	0	0	A_64_P093894	A_64_P093894	11641.1	412.386	4.556711e+001	5.669702e+000	99	28	6.616029e+000	0	0	0	0	0	0	39.6827	1	1	57.259	27.5294
DATA	2621	31	71	0	0	A_64_P073378	NM_001025287	11666.1	412.378	7.491155e+002	7.498821e+001	701.5	29	7.528322e+000	0	0	0	0	0	0	649.239	1	1	49.1849	29.1714
DATA	2622	31	72	0	0	A_64_P096076	A_64_P096076	11691.8	412.43	3.420204e+000	3.406892e+000	60	29	6.078701e+000	0	0	0	0	0	0	-3.76287	0	0	65	28.2188
DATA	2623	31	73	0	0	A_42_P471835	TC610276	11717.2	412.239	2.988203e+003	2.988400e+002	2580.5	27.5	7.631813e+000	0	0	0	0	0	0	2564.24	1	1	46.8651	28.375
DATA	2624	31	74	0	0	A_42_P767737	AY724480	11742.4	412.36	3.358052e+003	3.358228e+002	2807.5	31	1.058784e+001	0	0	0	0	0	0	2867.73	1	1	48.8603	32.3667
DATA	2625	31	75	0	0	A_64_P016393	A_64_P016393	11767.8	412.457	3.910700e+003	3.910853e+002	3294	28	8.530912e+000	0	0	0	0	0	0	3323.46	1	1	51.0895	29.9643
DATA	2626	31	76	0	0	A_42_P803752	XM_580093	11792.9	412.466	1.754056e+001	3.891581e+000	76.5	30	7.263903e+000	0	0	0	0	0	0	14.835	1	1	48.5334	30.0833
DATA	2627	31	77	0	0	A_42_P589025	NM_134363	11818.7	412.5	5.838601e+004	5.838602e+003	48494	32	9.973628e+000	0	0	0	0	0	0	49139	1	1	57.5363	32.2647
DATA	2628	31	78	0	0	A_64_P107938	NM_001000930	11844.4	412.427	5.445567e+000	3.550076e+000	66	30	1.218929e+001	0	0	0	0	0	0	4.56072	1	0	57.5363	32.3103
DATA	2629	31	79	0	0	A_64_P088817	A_64_P088817	11869.7	412.689	4.036411e+002	4.051770e+001	398	28	6.382018e+000	0	0	0	0	0	0	336.474	1	1	48.2044	29.2857
DATA	2630	31	80	0	0	A_64_P000579	A_64_P000579	11894.8	412.5	1.370369e+004	1.370373e+003	10999.5	34	7.205732e+000	0	0	0	0	0	0	11369.6	1	1	52.9257	32.5484
DATA	2631	31	81	0	0	A_44_P570046	TC630334	11920.4	412.26	4.678387e+002	4.691899e+001	441	29.5	5.897588e+000	0	0	0	0	0	0	386.294	1	1	49.5074	31.3077
DATA	2632	31	82	0	0	A_44_P431629	NM_001106835	11945.7	412.5	8.173687e+001	8.921069e+000	130	29	5.954041e+000	0	0	0	0	0	0	67.1851	1	1	57.5363	27.9688
DATA	2634	31	84	0	0	A_42_P485932	NM_001034927	11996.4	412.411	1.390375e+004	1.390380e+003	10776	30.5	6.157418e+000	0	0	0	1	0	0	11325.1	1	1	48.5334	30.5
DATA	2635	31	85	66	1	DarkCorner	DarkCorner	12022	412.455	3.637185e+000	3.623029e+000	54	29.5	6.718386e+000	0	0	0	0	0	0	-6.53844	0	0	55.8519	28.587
DATA	2636	32	1	66	1	DarkCorner	DarkCorner	9901.74	418.188	3.135654e+000	3.123450e+000	54	27	7.972590e+000	0	0	0	0	0	0	-4.04341	0	0	46.5243	27.7073
DATA	2637	32	2	0	0	A_64_P048366	ENSRNOT00000059330	9927	418.5	1.329888e+003	1.330251e+002	1319	27.5	9.412575e+000	0	0	0	0	0	0	1257.24	1	1	47.2035	28.8214
DATA	2638	32	3	0	0	A_44_P1058980	NM_001012036	9952.12	418.644	2.404168e+003	2.404367e+002	2312	31.5	8.075506e+000	0	0	0	0	0	0	2283.64	1	1	42.9674	30.4
DATA	2639	32	4	0	0	A_64_P062562	ENSRNOT00000027655	9977.52	418.761	5.114042e+001	5.969393e+000	106	28	6.963530e+000	0	0	0	0	0	0	48.7992	1	1	46.5243	28.7429
DATA	2640	32	5	0	0	A_44_P490100	ENSRNOT00000043641	10003.3	418.5	2.774483e+001	4.134689e+000	87	27	7.073593e+000	0	0	0	0	0	0	26.5903	1	1	57.5363	27.4643
DATA	2641	32	6	0	0	A_42_P473886	NM_001165922	10028.6	418.573	4.783514e+002	4.793247e+001	526	28	6.777441e+000	0	0	0	0	0	0	460.327	1	1	57.5363	28.3939
DATA	2642	32	7	0	0	A_64_P393339	ENSRNOT00000057753	10054	418.545	4.456141e+001	5.395029e+000	103	33	6.713425e+000	0	0	0	0	0	0	43.0492	1	1	55.8519	31.8485
DATA	2643	32	8	0	0	A_44_P461154	NM_053819	10079.2	418.868	3.673500e+002	3.685975e+001	409.5	27.5	6.738715e+000	0	0	0	0	0	0	356.194	1	1	46.1809	27.5938
DATA	2644	32	9	0	0	A_42_P701991	NM_001100671	10104.7	418.556	3.475734e+003	3.475865e+002	3319	27	7.361362e+000	0	0	0	0	0	0	3381.74	1	1	48.5334	28.7586
DATA	2645	32	10	1028	1	(+)E1A_r60_1	E1A_r60_1	10129.8	418.54	3.021841e+000	3.010080e+000	58	26.5	7.601775e+000	0	0	0	0	0	0	-1.98337	0	0	44.4243	28.0294
DATA	2646	32	11	0	0	A_44_P541230	ENSRNOT00000010675	10155.5	418.864	1.728452e+003	1.728713e+002	1689	26	4.585683e+000	0	0	0	0	0	0	1692.31	1	1	45.4864	26.4815
DATA	2647	32	12	0	0	A_64_P004593	NM_001166761	10181	418.545	6.438699e+000	3.060960e+000	68	29	8.234285e+000	0	0	0	0	0	0	6.32157	1	0	65	28.3
DATA	2648	32	13	0	0	A_64_P018385	ENSRNOT00000063845	10206.8	419.061	9.876447e+000	3.143628e+000	69	30	7.118385e+000	0	0	0	0	0	0	9.72285	1	0	45.835	29.3684
DATA	2649	32	14	0	0	A_64_P017590	NM_001000096	10231.6	418.573	2.989339e+000	2.977704e+000	56	32	7.721680e+000	0	0	0	0	0	0	-4.46552	0	0	57.5363	31.9286
DATA	2650	32	15	0	0	A_42_P810118	XM_001075984	10257.4	418.573	5.671916e+002	5.679693e+001	596	30	9.698219e+000	0	0	0	0	0	0	560.87	1	1	57.5363	30.5938
DATA	2651	32	16	0	0	A_42_P772157	NM_017020	10282.6	419.298	1.620383e+003	1.620654e+002	1612	32	7.387901e+000	0	0	0	0	0	0	1605.57	1	1	46.1809	30.5946
DATA	2652	32	17	0	0	A_42_P542809	NM_021671	10307.8	419.224	5.606595e+002	5.614403e+001	615	32	7.221509e+000	0	0	0	0	0	0	556.496	1	1	46.1809	30.8261
DATA	2653	32	18	0	0	A_42_P645352	NM_001126371	10333	419.172	4.461527e+003	4.461625e+002	4395	27	4.467993e+000	0	0	0	0	0	0	4435.17	1	1	45.4864	27.5
DATA	2654	32	19	0	0	A_64_P106933	NM_001130493	10358.9	418.661	3.681765e+001	4.718844e+000	97.5	26	5.122313e+000	0	0	0	0	0	0	36.6482	1	1	42.9674	26.3571
DATA	2655	32	20	0	0	A_42_P614175	NM_033237	10384.1	418.935	7.719793e+002	7.725420e+001	788.5	29.5	8.571840e+000	0	0	0	0	0	0	769.32	1	1	54.4085	29.4583
DATA	2656	32	21	0	0	A_64_P147190	NM_031840	10409.4	418.987	3.158146e+003	3.158283e+002	3173.5	27.5	5.971715e+000	0	0	0	0	0	0	3150.25	1	1	49.1849	27.5714
DATA	2657	32	22	0	0	A_43_P11268	NM_031762	10434.7	419	5.132279e+003	5.132364e+002	5032	29.5	7.143965e+000	0	0	0	0	0	0	5123.26	1	1	49.8279	29.4167
DATA	2658	32	23	0	0	A_64_P022215	A_64_P022215	10460.1	419.061	1.316520e+002	1.348983e+001	192.5	31	8.444691e+000	0	0	0	0	0	0	131.494	1	1	46.5243	31.7931
DATA	2659	32	24	0	0	A_64_P001080	NM_001109379	10485.7	419.1	1.336018e+002	1.367995e+001	190.5	28	6.433506e+000	0	0	0	0	0	0	133.49	1	1	47.2035	29.16
DATA	2660	32	25	0	0	A_42_P468662	NM_001108886	10510.8	418.806	1.414476e+003	1.414781e+002	1445	27	5.092528e+000	0	0	0	0	0	0	1413.48	1	1	47.5395	26.4231
DATA	2661	32	26	0	0	A_42_P522285	NM_001044263	10536.1	418.687	3.949265e+002	3.960195e+001	438	27	7.389750e+000	0	0	0	0	0	0	394.637	1	1	45.835	28.7429
DATA	2662	32	27	0	0	A_42_P478500	NM_177421	10561.6	418.931	1.444904e+005	1.444904e+004	143628	34	1.009472e+001	0	0	0	0	0	0	144359	1	1	53.8203	35.4
DATA	2663	32	28	0	0	A_42_P739860	NM_133578	10586.8	418.806	2.493848e+003	2.494021e+002	2431	28	1.049534e+001	0	0	0	0	0	0	2490.58	1	1	47.5395	31.1786
DATA	2664	32	29	0	0	A_42_P708614	NM_001130505	10612.5	419	4.612760e+004	4.612761e+003	45460	34	9.433916e+000	0	0	0	0	0	0	46041.7	1	1	54.1152	35.4146
DATA	2665	32	30	0	0	A_64_P067000	NM_001108721	10637.9	419.176	3.224489e+002	3.237915e+001	385	30	9.146724e+000	0	0	0	0	0	0	321.614	1	1	47.5395	31.3448
DATA	2666	32	31	0	0	A_44_P590748	NM_001109199	10663.5	419	6.407481e+001	7.053316e+000	124	28	7.220635e+000	0	0	0	0	0	0	63.8482	1	1	54.1152	28.7143
DATA	2667	32	32	0	0	A_42_P742797	NM_001106761	10688.4	419.239	2.876283e+003	2.876435e+002	2777	26.5	1.107344e+001	0	0	0	0	0	0	2863.11	1	1	46.5243	31.1
DATA	2668	32	33	0	0	A_42_P761277	NM_001008297	10714	419	1.047119e+003	1.047536e+002	1042	31.5	8.352552e+000	0	0	0	0	0	0	1040.97	1	1	46.8651	30.9063
DATA	2669	32	34	0	0	A_42_P503739	FQ231471	10739.4	419.027	1.479643e+004	1.479645e+003	14660	28	8.162400e+000	0	0	0	0	0	0	14688.5	1	1	48.5334	29.2647
DATA	2670	32	35	0	0	A_42_P635760	ENSRNOT00000023806	10764.9	419.024	8.962915e+003	8.962964e+002	8811	31	6.027871e+000	0	0	0	0	0	0	8883.28	1	1	50.7771	30.0909
DATA	2671	32	36	0	0	A_64_P136337	ENSRNOT00000064588	10790.1	419.104	3.144470e+003	3.144610e+002	3035	29	6.052109e+000	0	0	0	0	0	0	3111.15	1	1	46.8651	29.2188
DATA	2672	32	37	0	0	A_64_P128316	ENSRNOT00000062007	10815.3	419.279	1.808114e+001	3.481448e+000	80	28	7.967452e+000	0	0	0	0	0	0	17.8559	1	1	44.4243	28.1379
DATA	2673	32	38	0	0	A_64_P050799	A_64_P050799	10841	419.162	1.497822e+002	1.527206e+001	209.5	25	6.477753e+000	0	0	0	0	0	0	147.605	1	1	46.8651	26.8065
DATA	2674	32	39	0	0	A_42_P701779	NM_001108048	10866.1	419.268	1.760914e+003	1.761167e+002	1698	23	6.683313e+000	0	0	0	0	0	0	1731.55	1	1	47.5395	25.4
DATA	2675	32	40	0	0	A_42_P604900	NM_199117	10891.9	419.257	4.078713e+003	4.078823e+002	3956.5	28	8.532469e+000	0	0	0	0	0	0	4001.08	1	1	48.2044	29.5
DATA	2676	32	41	0	0	A_44_P1060444	NM_001106644	10916.9	418.794	3.090303e+003	3.090449e+002	3076	27	7.280584e+000	0	0	0	0	0	0	3023.81	1	1	45.4864	26.4
DATA	2677	32	42	0	0	A_64_P090339	NM_001000756	10942.6	419.427	3.622831e+001	4.710390e+000	96	28	6.580936e+000	0	0	0	0	0	0	35.3568	1	1	57.5363	27.6061
DATA	2678	32	43	0	0	A_42_P770556	NM_033096	10967.7	419.222	5.345942e+003	5.346028e+002	5024	30	9.249151e+000	0	0	0	0	0	0	5202.82	1	1	47.5395	30.2414
DATA	2679	32	44	0	0	A_44_P606502	NM_001130502	10993.6	419.427	1.121049e+001	3.228644e+000	72	31	8.110165e+000	0	0	0	0	0	0	10.8782	1	0	65	31.0541
DATA	2680	32	45	0	0	A_64_P372189	NM_212516	11019	419.455	4.971787e+004	4.971788e+003	47697.5	29	9.096166e+000	0	0	0	0	0	0	48097.4	1	1	55.8519	30.8667
DATA	2681	32	46	0	0	A_42_P540518	NM_199399	11044	419.347	3.023007e+003	3.023161e+002	2926	28	6.475798e+000	0	0	0	0	0	0	2915.29	1	1	48.5334	28.6897
DATA	2682	32	47	0	0	A_64_P158955	ENSRNOT00000020260	11069.6	419.427	1.580183e+001	3.440975e+000	74.5	29	9.932159e+000	0	0	0	0	0	0	15.1885	1	1	65	30.1724
DATA	2683	32	48	0	0	A_44_P325841	NM_024130	11094.7	419.338	2.001403e+003	2.001638e+002	1898.5	31	8.146817e+000	0	0	0	0	0	0	1917.21	1	1	48.5334	31.4722
DATA	2684	32	49	0	0	A_64_P007743	XM_001071416	11120.5	419.5	1.380075e+002	1.413984e+001	194.5	31	8.555507e+000	0	0	0	0	0	0	131.731	1	1	57.5363	31.4324
DATA	2685	32	50	0	0	A_64_P136213	A_64_P136213	11145.9	419.5	4.103610e+000	3.116384e+000	69.5	32	6.765040e+000	0	0	0	0	0	0	3.90275	1	0	65	31.1081
DATA	2686	32	51	0	0	A_43_P17392	NM_001191693	11170.8	419.118	2.650781e+003	2.650963e+002	2486.5	30	8.458560e+000	0	0	0	0	0	0	2511.63	1	1	46.5243	29.2941
DATA	2687	32	52	0	0	A_42_P708569	NM_001191837	11196.7	419.1	6.611945e+003	6.612018e+002	6167.5	30	9.255673e+000	0	0	0	0	0	0	6240.33	1	1	47.2035	31.8966
DATA	2688	32	53	0	0	A_64_P062068	XM_002728030	11222.1	419.5	2.833513e+002	2.850695e+001	332	27	8.189796e+000	0	0	0	0	0	0	266.389	1	1	56.9804	28.4643
DATA	2689	32	54	0	0	A_43_P20266	NM_001106416	11247.4	419.507	1.342709e+002	1.378883e+001	186	31	7.402248e+000	0	0	0	0	0	0	125.726	1	1	49.5074	31.0286
DATA	2690	32	55	0	0	A_44_P248235	NM_001106048	11272.9	419.5	3.581705e+001	4.770303e+000	96	26	7.030410e+000	0	0	0	0	0	0	33.3991	1	1	56.9804	27.48
DATA	2691	32	56	0	0	A_64_P134717	NM_001101007	11298.4	419.427	3.176508e+000	3.165119e+000	63	26	6.706465e+000	0	0	0	0	0	0	0.729169	0	0	65	28.68
[truncated: 6,319,369 more chars]
